# Supplementary material for: ChiralN-triflylphosphoramide-catalyzed asymmetric hydroamination of unactivated alkenes: a hetero-ene reaction mechanism
Source: Royal Society of Chemistry journal article supplement (doi:10.1039/d1qo01874d), 2022-01-01
Supplement: d1qo01874d1.pdf [file d1qo01874d1.pdf]

*Electronic Supplementary Information*  
*for*  
**Chiral *N*-Triflylphosphoramidate-Catalyzed  
Asymmetric Hydroamination of Unactivated Alkenes:  
A Hetero-Ene Reaction Mechanism**

Na Wang,<sup>a,b,c</sup> Li-Wen Fan,<sup>c</sup> Jin Zhang,<sup>c</sup> Qiang-Shuai Gu,<sup>d</sup> Jin-Shun Lin,<sup>c</sup> Guo-Qiang  
Chen,<sup>\*a</sup> Xin-Yuan Liu,<sup>\*c</sup> and Peiyuan Yu<sup>\*c</sup>

<sup>a</sup>*College of Chemistry and Environmental Engineering, Shenzhen University,  
Shenzhen 518071, China*

<sup>b</sup>*College of Physics and Optoelectronic Engineering, Shenzhen University, Shenzhen  
518060, China*

<sup>c</sup>*Department of Chemistry and Shenzhen Grubbs Institute, Guangdong Provincial Key  
Laboratory of Catalysis, Southern University of Science and Technology, Shenzhen  
518055, China*

<sup>d</sup>*Academy for Advanced Interdisciplinary Studies and Department of Chemistry,  
Southern University of Science and Technology, Shenzhen 518055, China*

## Table of Contents

|                                                                       |     |
|-----------------------------------------------------------------------|-----|
| 1. Additional computational details .....                             | S3  |
| 1.1 Model computational study .....                                   | S3  |
| 1.2 The reaction of <b>AT-1</b> catalyzed by <b>NTPA-2R</b> .....     | S6  |
| 1.3 The reaction of <b>AT-2</b> catalyzed by <b>NTPA-2R</b> .....     | S13 |
| 1.4 The reaction of <b>AT-3</b> catalyzed by <b>NTPA-2R</b> .....     | S16 |
| 1.5 The reaction of <b>AT-4</b> catalyzed by <b>NTPA-2R</b> .....     | S18 |
| 1.6 The reaction of <b>AT-5</b> catalyzed by <b>NTPA-2R</b> .....     | S20 |
| 1.7 The reaction of <b>AT-6</b> catalyzed by <b>NTPA-2R</b> .....     | S22 |
| 1.8 The reaction of <b>AT-7</b> catalyzed by <b>NTPA-2R</b> .....     | S24 |
| 1.9 The reaction of <b>AT-1</b> catalyzed by <b>CPA-1R</b> .....      | S27 |
| 2. Energies and Cartesian coordinates of DFT-computed structures..... | S29 |

## 1. Additional computational details

### 1.1 Model computational study

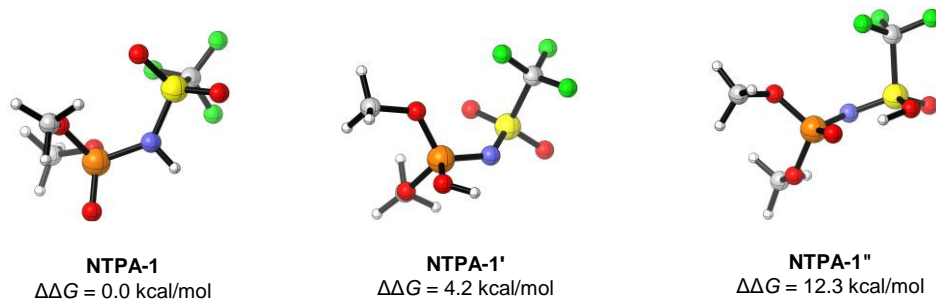

**Fig. S1** Computed relative free energies of model *N*-triflylphosphoramidate **NTPA-1** and its tautomers at the SMD(DCM)-M06-2X/6-311+G(d,p)//B3LYP/6-31G(d) theory level. Free energies are referred to that of **NTPA-1**.

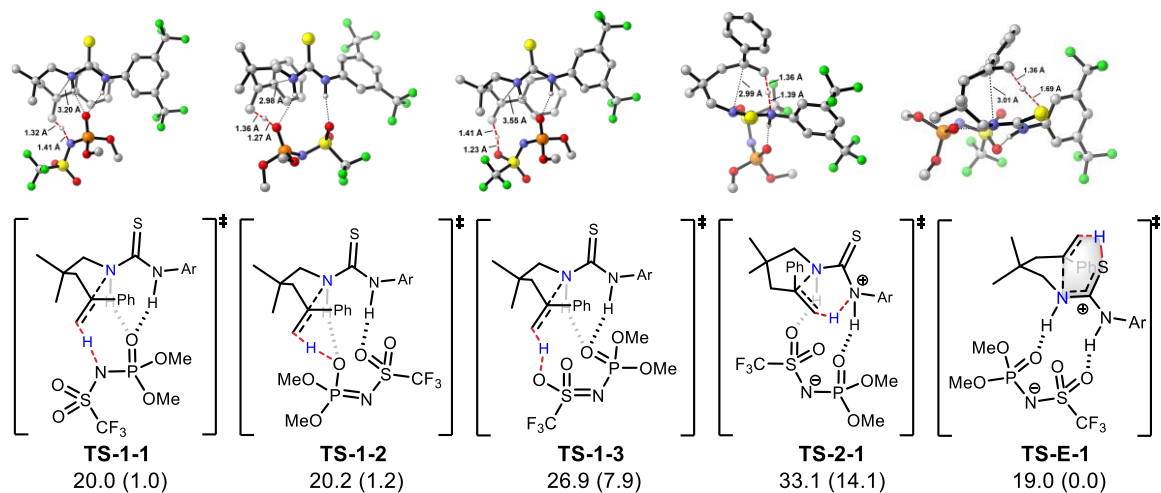

**Fig. S2** Computed activation energies ( $\Delta G^\ddagger$  in kcal/mol) of different pathways and 3D structures of corresponding transition states for the model reaction at the SMD(DCM)-M06-2X/6-311+G(d,p)//B3LYP/6-31G(d) theory level. Relative free energies ( $\Delta\Delta G^\ddagger$  in kcal/mol) are given in parenthesis and are referred to that of **TS-E-1**.

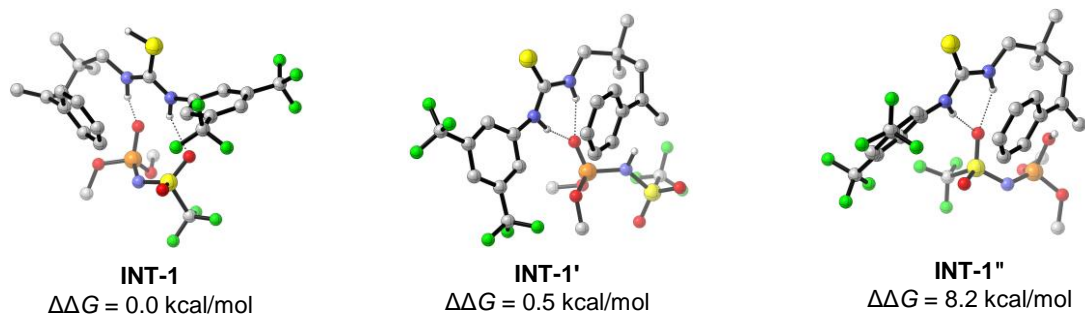

**Fig. S3** Computed relative free energies of precomplexes along different reactions pathways for the model reaction at the SMD(DCM)-M06-2X/6-311+G(d,p)//B3LYP/6-31G(d) theory level. Relative free energies are referred to that of **INT-1**.

## 1.2 The reaction of **AT-1** catalyzed by **NTPA-2R**

### 1.2.1 Comparison of the electronic and free energy differences of enantio-determining transition states calculated with different methods

For comparison with the B3LYP energies, geometry optimizations were also performed using the B3LYP-D3(BJ),  $\omega$ B97X-D, and M06-2X functionals together with the 6-31G(d) basis set for the transition states (**TS-EF-1S** & **TS-EF-1R**) along the heteroene reaction of **AT-1** catalyzed by **NTPA-2R**. Single-point energy calculations were calculated using the M06-2X functional together with the 6-311+G(d,p) basis set. The SMD model was used to account for solvent effects. Computations with B3LYP and  $\omega$ B97X-D were found to provide close agreement with the experimentally observed stereoselectivity. In addition, single-point energies were also evaluated within the SMD model using the  $\omega$ B97X-D and B3LYP-D3(BJ) functionals, which provided comparable enantioselectivities.

**Table S1.** Electronic and free energy differences of enantio-determining transition states calculated with different methods

| Entry               | Method                                                  | $\Delta\Delta E_{(R-S)}$ | $\Delta\Delta G_{(R-S)}$ |
|---------------------|---------------------------------------------------------|--------------------------|--------------------------|
| 1                   | SMD(DCM)-M06-2X/6-311+G(d,p)//B3LYP/6-31G(d)            | 1.2                      | 2.0                      |
| 2                   | SMD(DCM)-M06-2X/6-311+G(d,p)//B3LYP-D3(BJ)/6-31G(d)     | 3.9                      | 3.5                      |
| 3                   | SMD(DCM)-M06-2X/6-311+G(d,p)// $\omega$ B97X-D/6-31G(d) | 3.2                      | 1.8                      |
| 4                   | SMD(DCM)-M06-2X/6-311+G(d,p)//M06-2X/6-31G(d)           | 1.4                      | 1.0                      |
| 5                   | SMD(DCM)- $\omega$ B97X-D/6-311+G(d,p)//B3LYP/6-31G(d)  | 1.1                      | 1.9                      |
| 6                   | SMD(DCM)-B3LYP-D3(BJ)/6-311+G(d,p)//B3LYP/6-31G(d)      | 1.8                      | 2.6                      |
| Experimental result |                                                         | (S)- <b>1</b> , 94% ee   |                          |

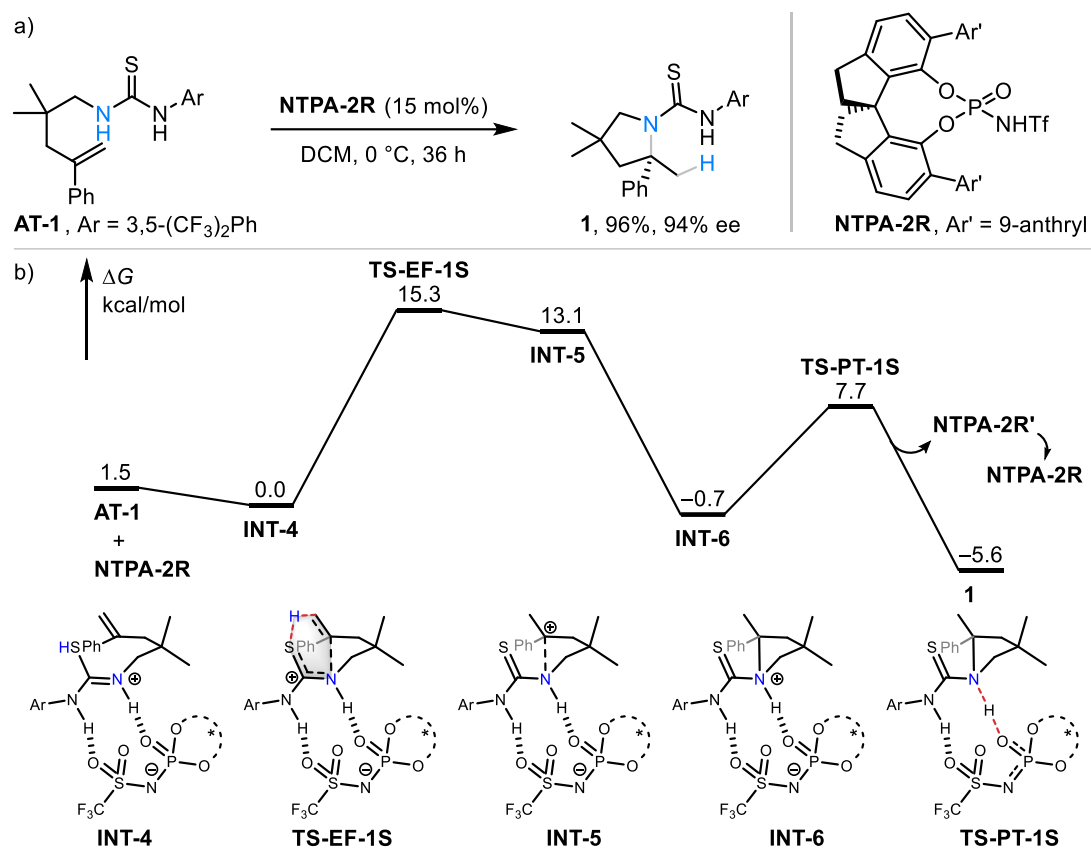

**Fig. S4** (a) Experimental results of the hydroamination reaction of **AT-1** catalyzed by **NTPA-2R**. (b) Free energy profile of the most favorable hetero-ene reaction pathway.

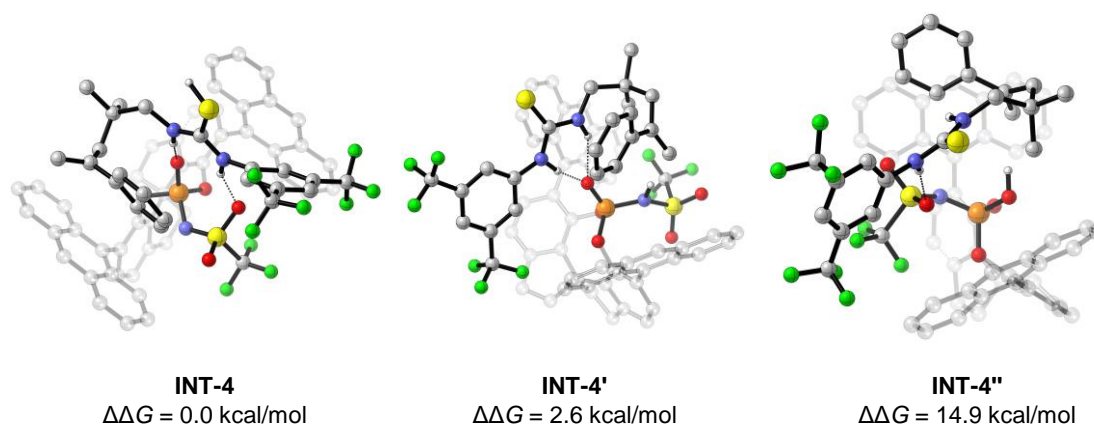

**Fig. S5** Computed relative free energies of precomplexes along different reactions pathways for the reaction of **AT-1** catalyzed by **NTPA-2R** at the SMD(DCM)-M06-2X/6-311+G(d,p)//B3LYP/6-31G(d) theory level. Relative free energies are referred to **INT-4**.



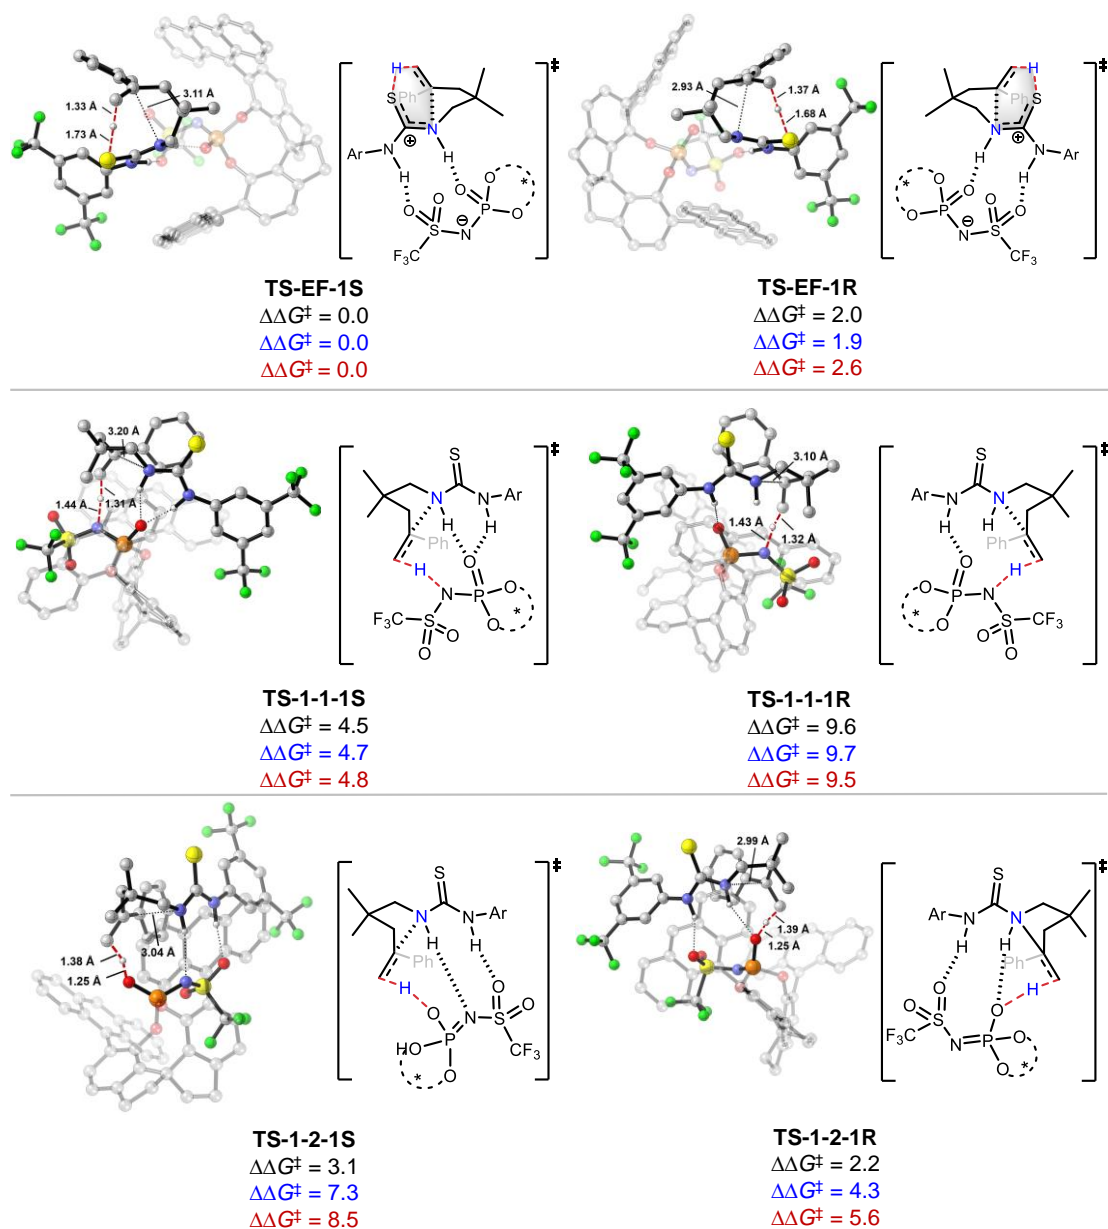

SMD(DCM)-M06-2X/6-311+G(d,p)//B3LYP/6-31G(d)  
SMD(DCM)- $\omega$ B97X-D/6-311+G(d,p)//B3LYP/6-31G(d)  
SMD(DCM)-B3LYP-D3(BJ)/6-311+G(d,p)//B3LYP/6-31G(d)

**Fig. S6** Computed favorable transition states of the reaction of **AT-1** catalyzed by **NTPA-2R** with three methods. Relative free energies are referred to **TS-EF-1S**.

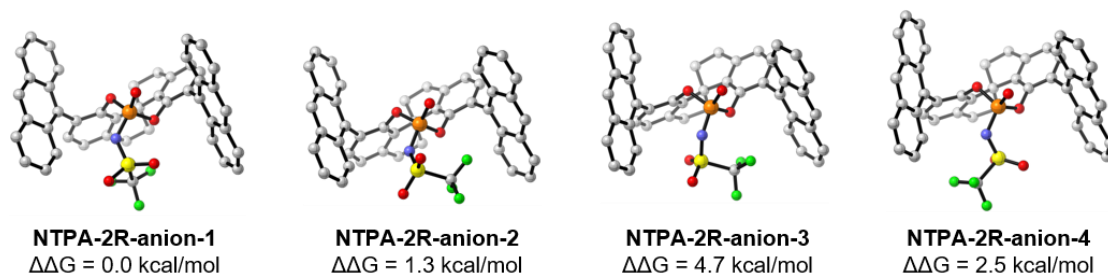

**Fig. S7** Computed relative free energies of the *N*-triflylphosphoramidate anion at the SMD(DCM)-M06-2X/6-311+G(d,p)//B3LYP/6-31G(d) theory level. Relative free energies are referred to **NTPA-2R-anion-1**.

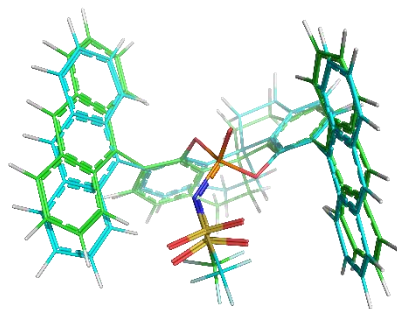

**Fig. S8** Superimposition of the catalyst fragment in **TS-EF-1S** with the corresponding fully relaxed free structure **NTPA-2R-anion-1**. Carbons in **NTPA-2R-anion-1** are drawn in green while that in **TS-EF-1S** blue.

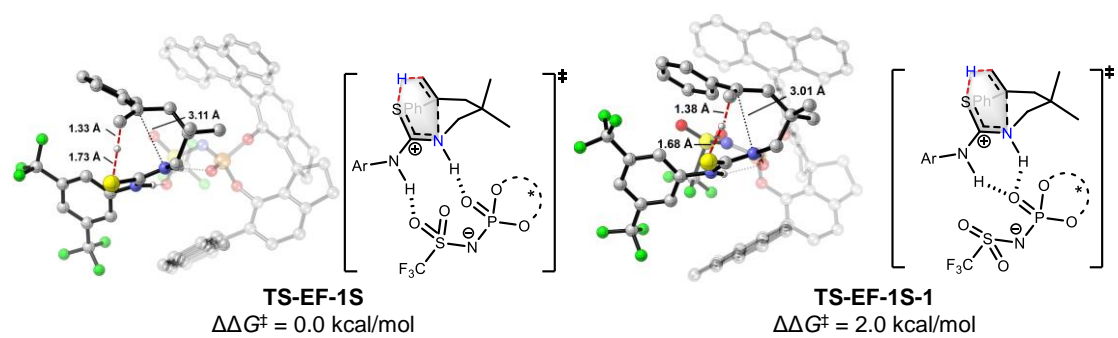

**Fig. S9** The Importance of the triflyl moiety in forming hydrogen bonding for lowering the reaction barrier.

### 1.3 The reaction of **AT-2** catalyzed by **NTPA-2R**

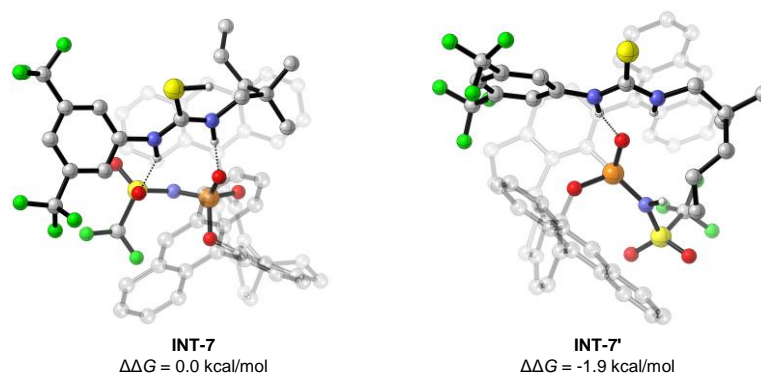

**Fig. S10** Computed relative free energies of precomplexes along different reactions pathways of the reaction of **AT-2** catalyzed by **NTPA-2R** at the SMD(DCM)-M06-2X/6-311+G(d,p)//B3LYP/6-31G(d) theory level. Relative free energies are referred to **INT-7**.

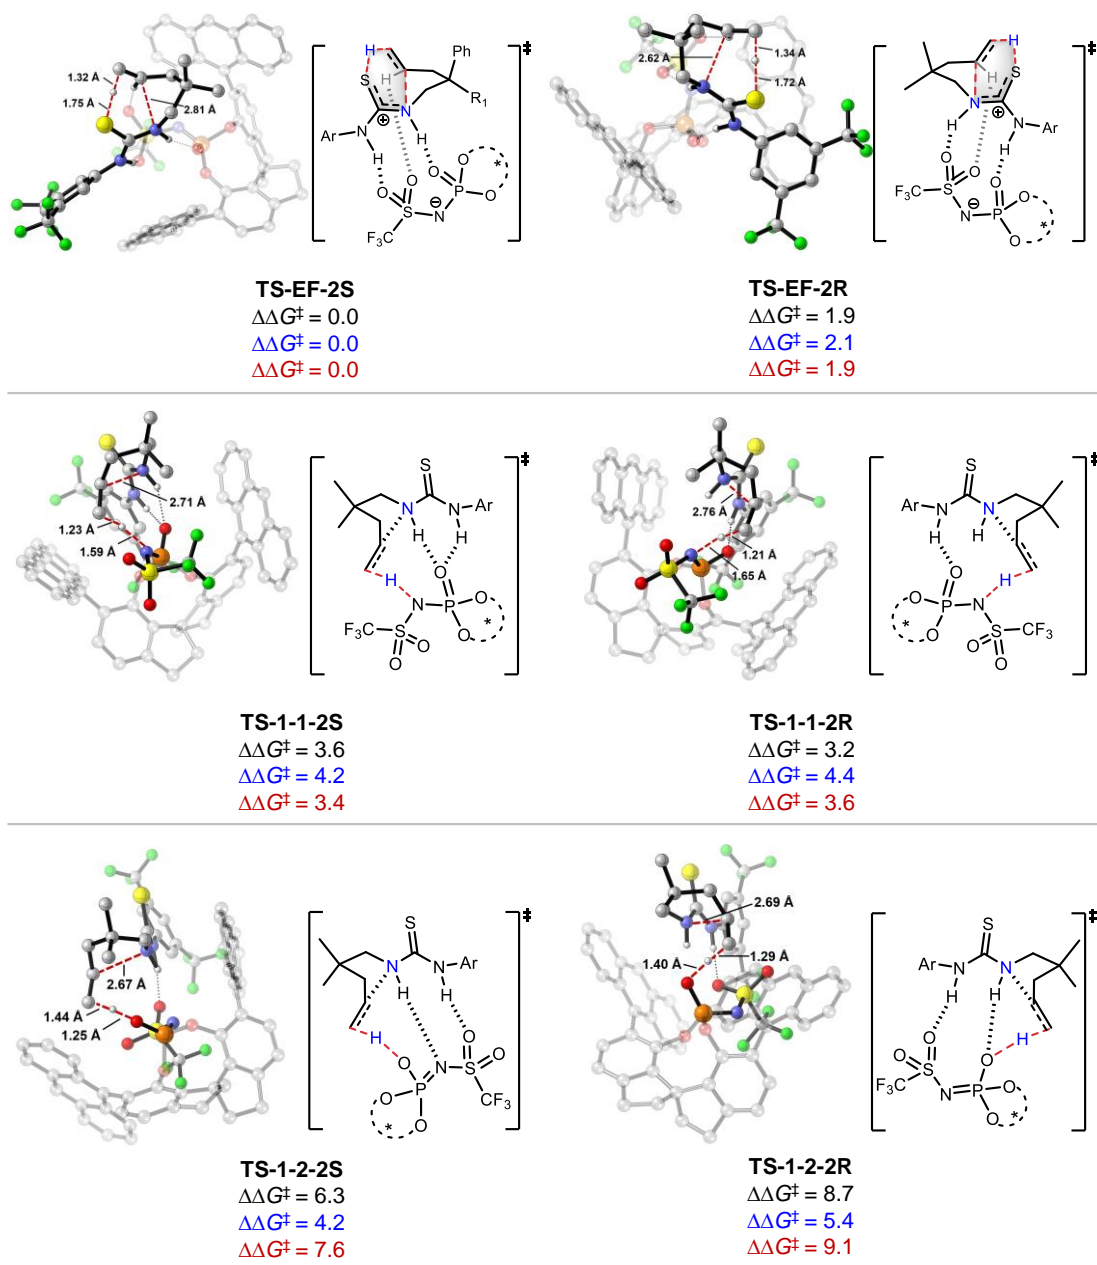

SMD(DCM)-M06-2X/6-311+G(d,p)//B3LYP/6-31G(d)  
SMD(DCM)- $\omega$ B97X-D/6-311+G(d,p)//B3LYP/6-31G(d)  
SMD(DCM)-B3LYP-D3(BJ)/6-311+G(d,p)//B3LYP/6-31G(d)

**Fig. S11** Computed favorable transition states of the reaction of **AT-2** catalyzed by **NTPA-2R** with three methods. Relative free energies are referred to **TS-EF-2S**.

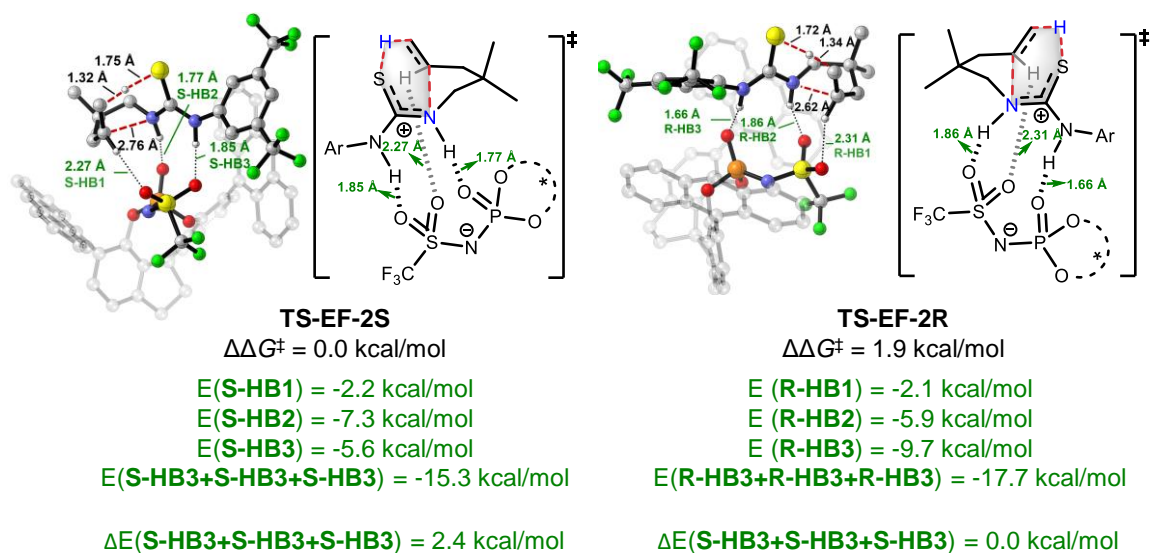

**Fig. S12** Comparison of the hydrogen bond interactions in **TS-EF-2S** and **TS-EF-2R**.

#### 1.4 The reaction of **AT-3** catalyzed by **NTPA-2R**

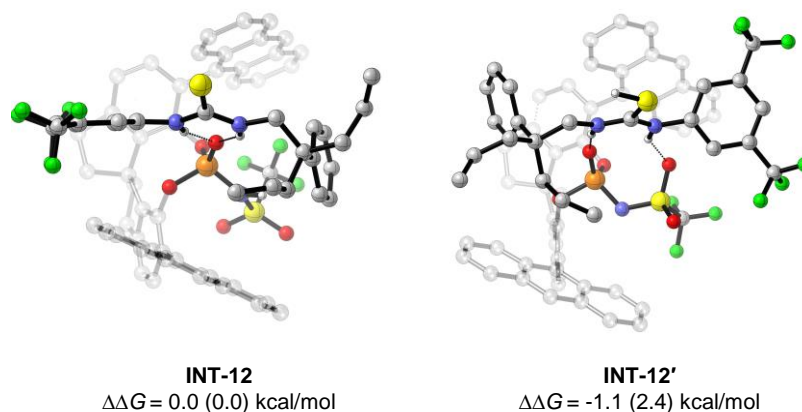

**Fig. S13** Computed relative free energies of precomplexes along different reactions pathways for the reaction of **AT-3** catalyzed by **NTPA-2R** at the SMD(DCM)-M06-2X/6-311+G(d,p)//B3LYP/6-31G(d) theory level. Energies in cyclohexane were also calculated at the SMD(cyclohexane)-M06-2X/6-311+G(d,p)//B3LYP/6-31G(d) theory level and shown in parenthesis. Relative free energies are referred to **INT-12**.



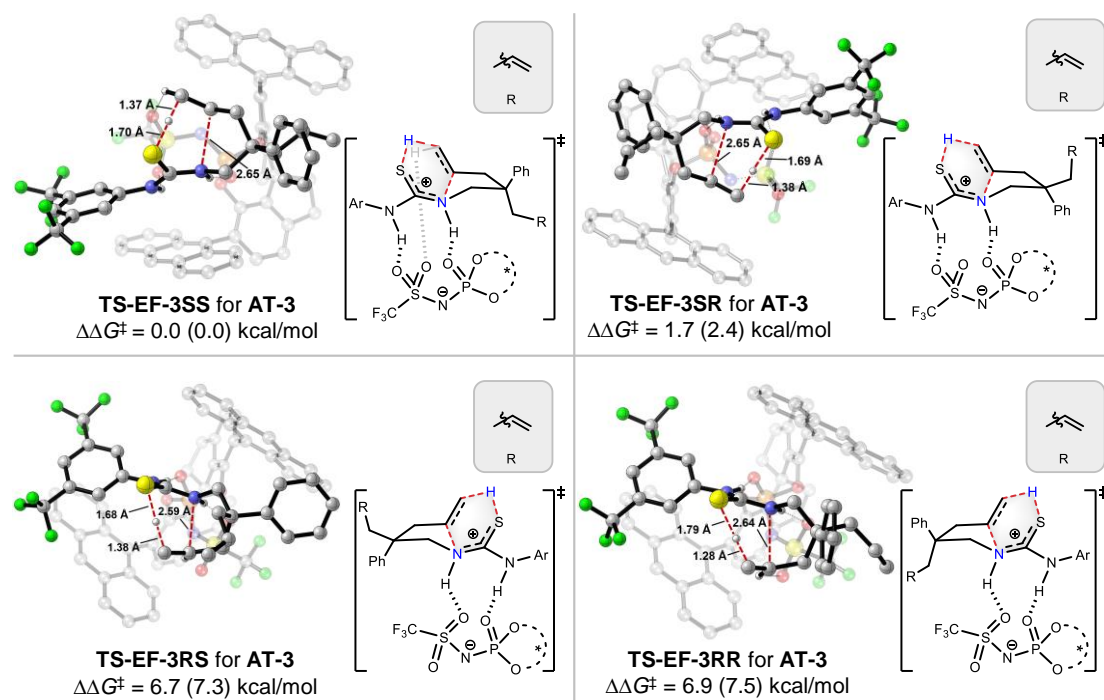

**Fig. S14** Geometries and energies of the four optimized hetero-ene transition states leading to the four product stereoisomers of **AT-3** at the SMD(DCM)-M06-2X/6-311+G(d,p)//B3LYP/6-31G(d) theory level. Energies in cyclohexane were also calculated at the SMD(cyclohexane)-M06-2X/6-311+G(d,p)//B3LYP/6-31G(d) theory level and shown in parenthesis. Relative free energies are referred to **TS-EF-3SS**.

## 1.5 The reaction of **AT-4** catalyzed by **NTPA-2R**

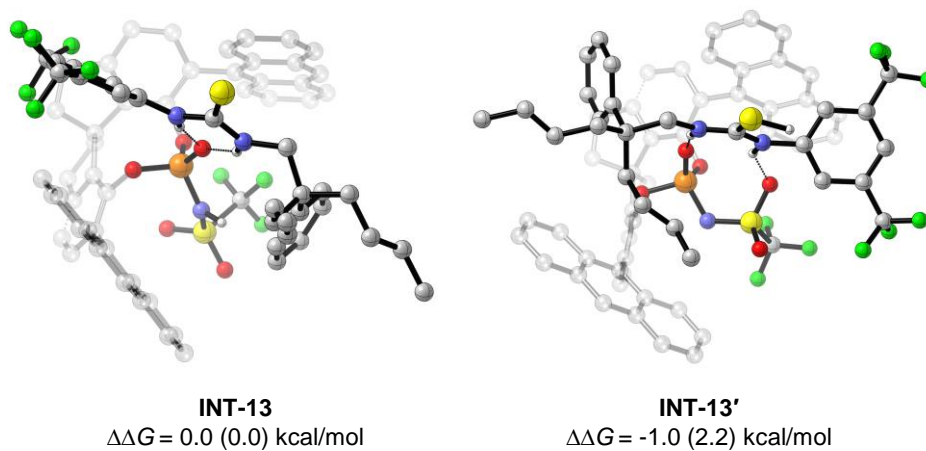

**Fig. S15** Computed relative free energies of precomplexes along different reactions pathways for the reaction of **AT-4** catalyzed by **NTPA-2R** at the SMD(DCM)-M06-2X/6-311+G(d,p)//B3LYP/6-31G(d) theory level. Energies in cyclohexane were also calculated at the SMD(cyclohexane)-M06-2X/6-311+G(d,p)//B3LYP/6-31G(d) theory level and shown in parenthesis. Relative free energies are referred to **INT-13**.

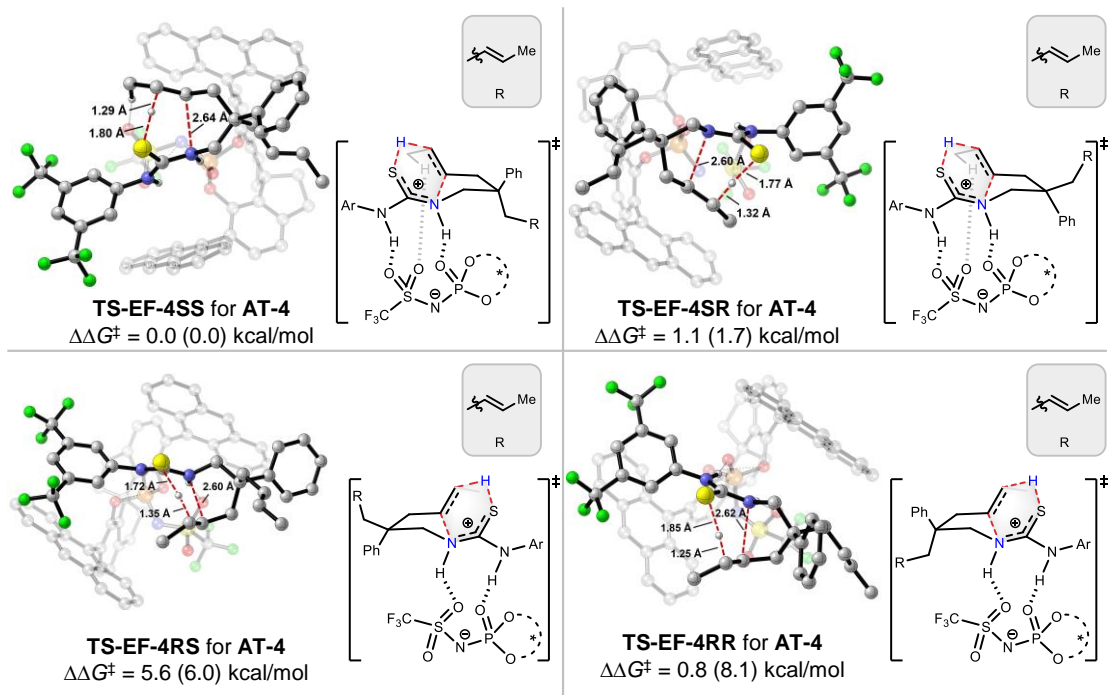

**Fig. S16** Geometries and energies of the four optimized hetero-ene transition states leading to the four product stereoisomers of **AT-4** at the SMD(DCM)-M06-2X/6-311+G(d,p)//B3LYP/6-31G(d) theory level. Energies in cyclohexane were also calculated at the SMD(cyclohexane)-M06-2X/6-311+G(d,p)//B3LYP/6-31G(d) theory level and shown in parenthesis. Relative free energies are referred to **TS-EF-4SS**.

## 1.6 The reaction of **AT-5** catalyzed by **NTPA-2R**

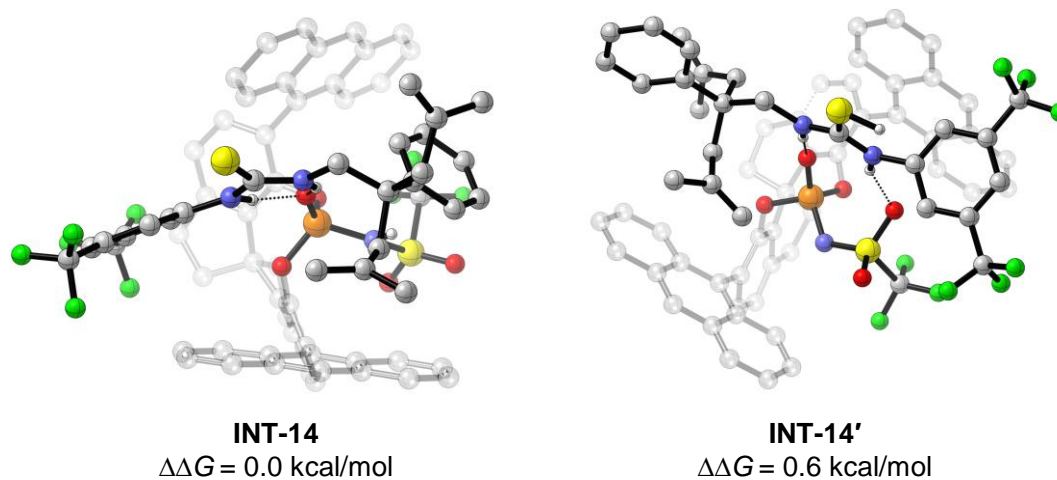

**Fig. S17** Computed relative free energies of precomplexes along different reactions pathways for the reaction of **AT-5** catalyzed by **NTPA-2R** at the SMD(DCM)-M06-2X/6-311+G(d,p)//B3LYP/6-31G(d) theory level. Relative free energies are referred to **INT-14**.

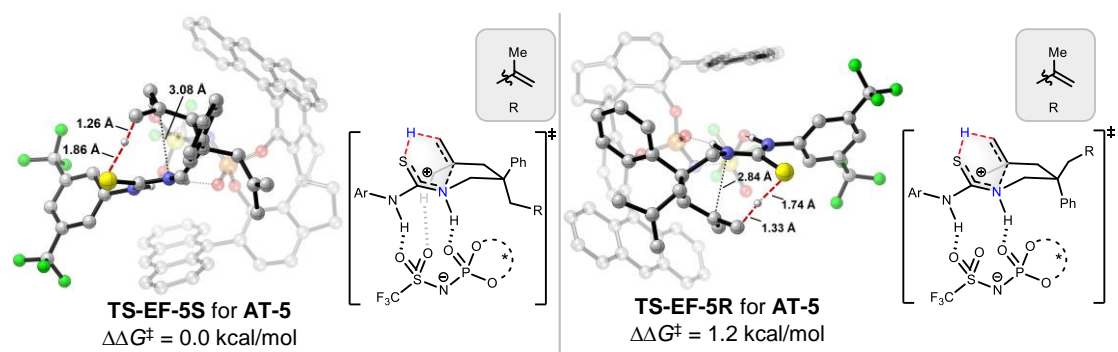

**Fig. S18** Geometries and energies of the two optimized hetero-ene transition states leading to the two product enantiomers of **AT-5** at the SMD(DCM)-M06-2X/6-311+G(d,p)//B3LYP/6-31G(d) theory level. Relative free energies are referred to **TS-EF-5S**.

## 1.7 The reaction of **AT-6** catalyzed by **NTPA-2R**

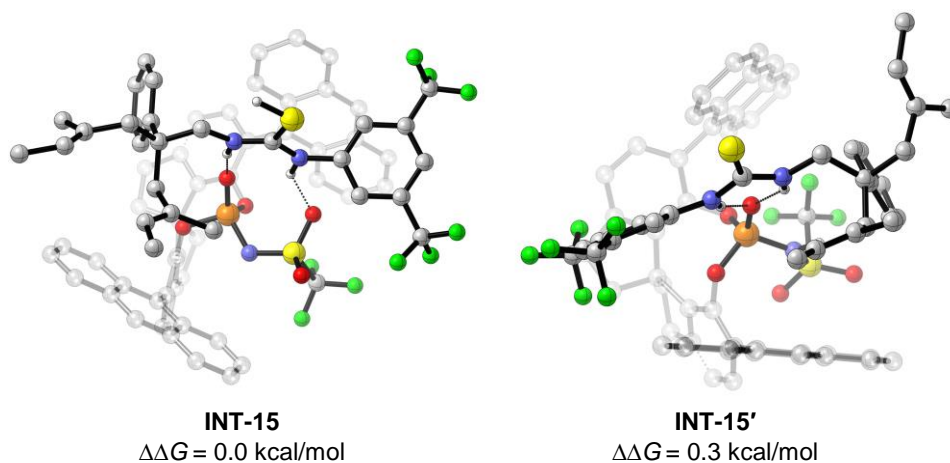

**Fig. S19** Computed relative free energies of precomplexes along different reactions pathways for the reaction of **AT-6** catalyzed by **NTPA-2R** at the SMD(DCM)-M06-2X/6-311+G(d,p)//B3LYP/6-31G(d) theory level. Relative free energies are compared to **INT-15**.

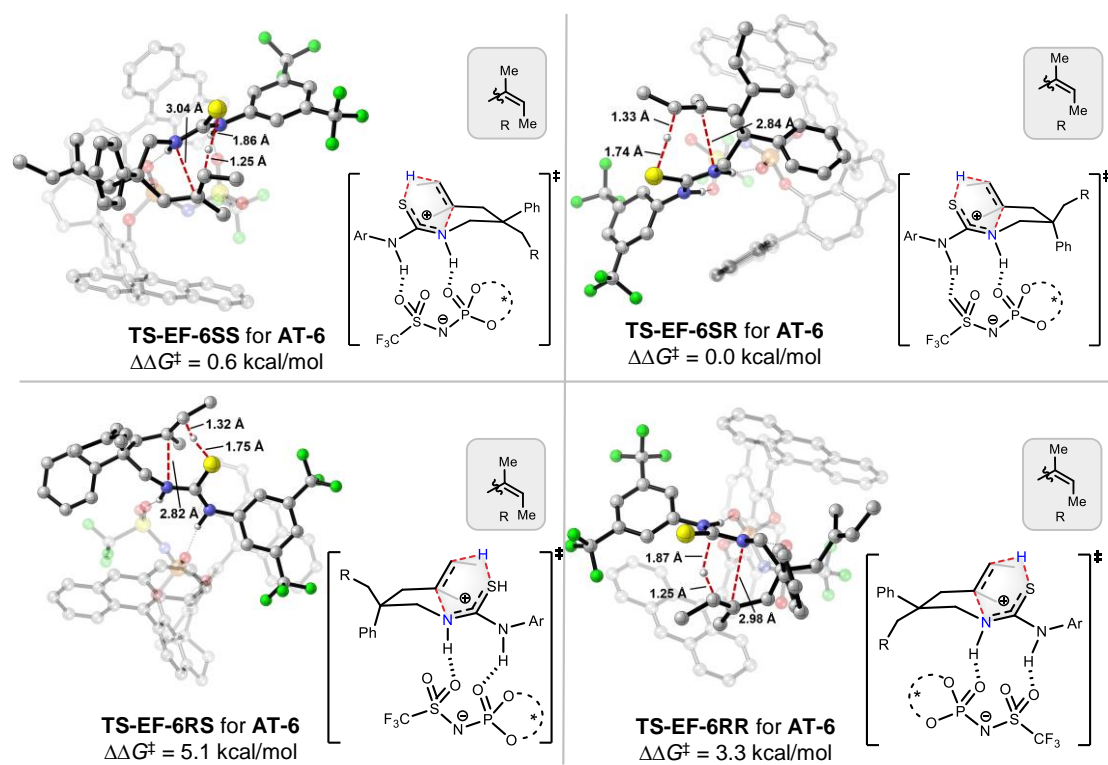

**Fig. S20** Geometries and energies of the four optimized hetero-ene transition states leading to the four product stereoisomers of **AT-6** at the SMD(DCM)-M06-2X/6-311+G(d,p)//B3LYP/6-31G(d) theory level. Relative free energies are referred to **TS-EF-6SR**.

## 1.8 The reaction of **AT-7** catalyzed by **NTPA-2R**

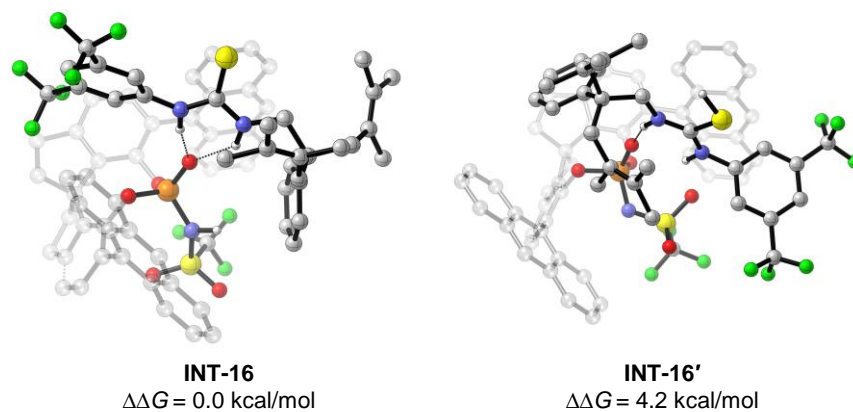

**Fig. S21** Computed relative free energies of precomplexes along different reactions pathways for the reaction of **AT-7** catalyzed by **NTPA-2R** at the SMD(DCM)-M06-2X/6-311+G(d,p)//B3LYP/6-31G(d) theory level. Relative free energies are referred to **INT-16**.



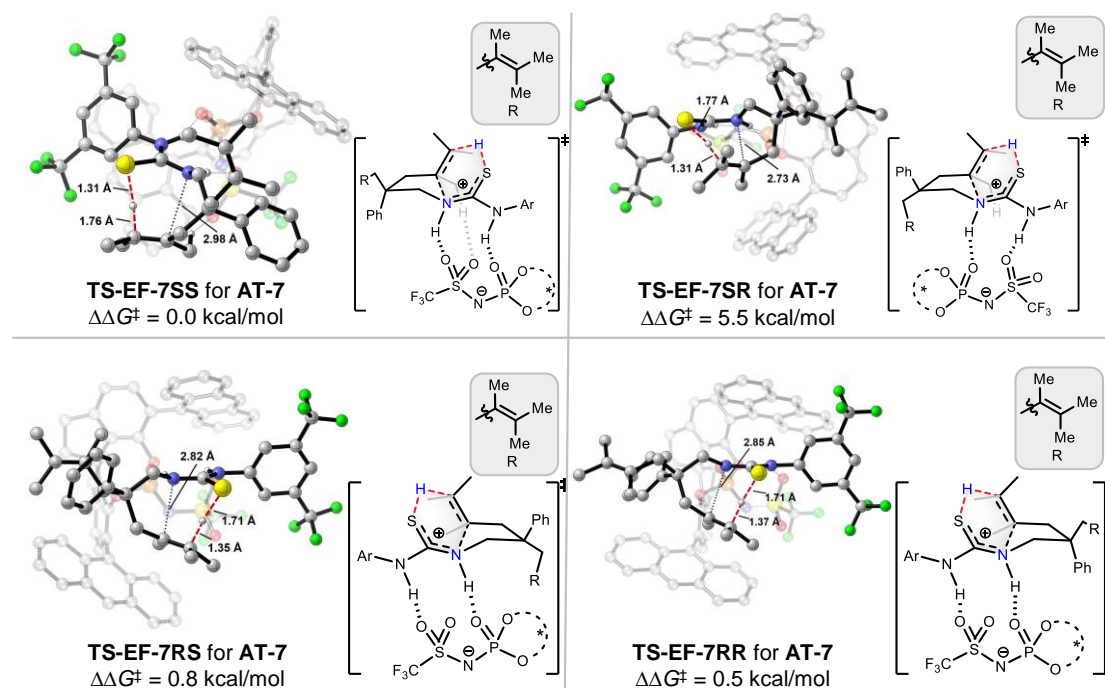

**Fig. S22** Geometries and energies of the four optimized hetero-ene transition states leading to the four product stereoisomers of **AT-7** at the SMD(DCM)-M06-2X/6-311+G(d,p)//B3LYP/6-31G(d) theory level. Relative free energies are referred to **TS-EF-7SS**.

## 1.9 Summary of computational results on different substituted alkenes

**Table S2.** Computational Results of Different Substituted Alkenes

| Compd.<br>No. | NPA charge in S.M. |       | NPA charge in T.S. |       | Length in T.S. (Å) |       |      | Reaction barrier<br>$\Delta G$ (kcal/mol) |
|---------------|--------------------|-------|--------------------|-------|--------------------|-------|------|-------------------------------------------|
|               | C1                 | C2    | C1'                | C2'   | C1'-N              | C2'-H | S-H  |                                           |
| <b>AT-3</b>   | -0.21              | -0.44 | 0.02               | -0.67 | 2.65               | 1.37  | 1.70 | 18.5 (19.1)                               |
| <b>AT-4</b>   | -0.22              | -0.22 | 0.05               | -0.49 | 2.64               | 1.29  | 1.80 | 20.8 (22.7)                               |
| <b>AT-5</b>   | -0.01              | -0.44 | 0.31               | -0.73 | 3.08               | 1.26  | 1.86 | 14.4                                      |
| <b>AT-6</b>   | -0.02              | -0.22 | 0.25               | -0.48 | 2.84               | 1.33  | 1.74 | 15.0                                      |
| <b>AT-7</b>   | -0.02              | -0.02 | 0.25               | -0.27 | 2.98               | 1.31  | 1.76 | 16.7                                      |

## 1.10 The reaction of **AT-1** catalyzed by **CPA-1R**

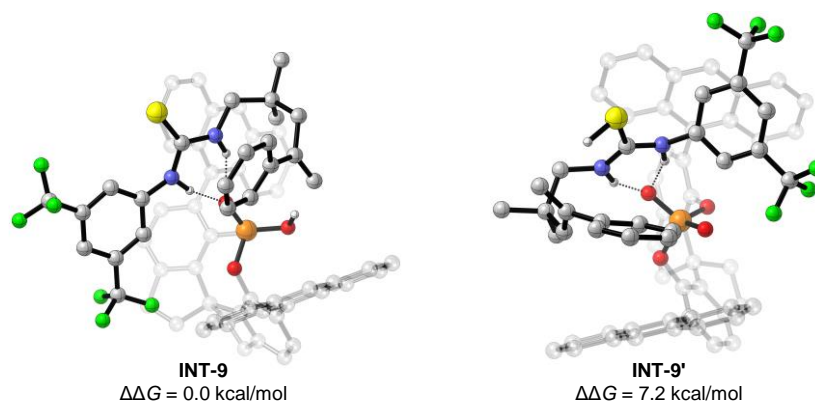

**Fig. S23** Computed relative free energies of precomplexes along different reactions pathways for the reaction of **AT-1** catalyzed by **CPA-1R** at the SMD(DCM)-M06-2X/6-311+G(d,p)//B3LYP/6-31G(d) theory level. Relative free energies are referred to **INT-9**.

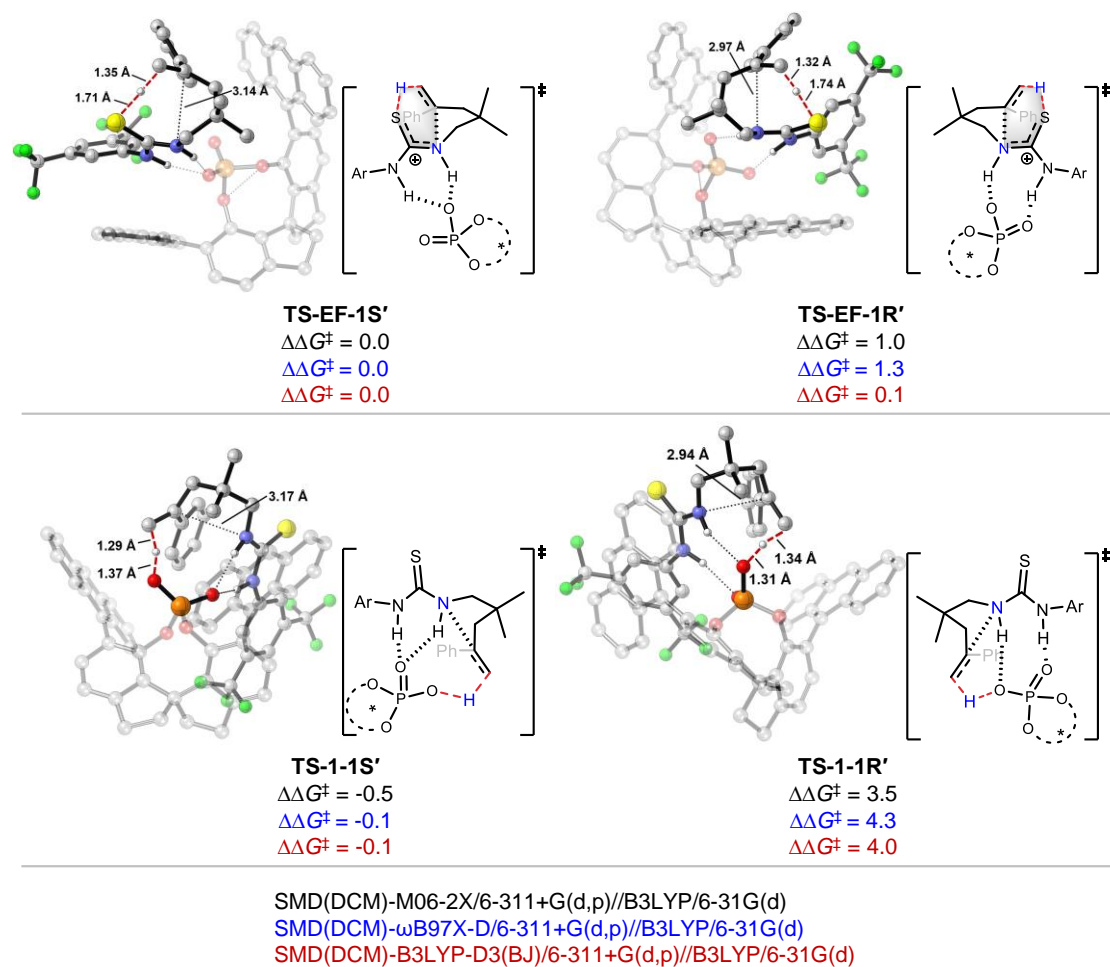

**Fig. S24** Computed favorable transition states of the reaction of **AT-1** catalyzed by **CPA-1R** with three methods. Relative free energies are referred to **TS-EF-1S'**.

## 2. Energies and Cartesian coordinates of DFT-computed structures

NTPA-1

0 imaginary frequency

H = -1588.293608

G = -1588.357204

E(M06-2X-DCM) = -1588.420716

|   |             |             |             |
|---|-------------|-------------|-------------|
| O | 1.26938300  | 1.55015600  | 0.00561600  |
| O | 2.08087200  | -0.58986000 | -0.90336500 |
| P | 1.67529800  | 0.08145300  | 0.48725500  |
| O | 2.60807300  | -0.06646300 | 1.62378600  |
| N | 0.15717000  | -0.57166500 | 0.93228900  |
| H | 0.03583300  | -0.74039500 | 1.92792400  |
| S | -1.21032400 | -0.95104400 | 0.04382200  |
| C | -2.11465200 | 0.68701700  | -0.11558600 |
| O | -2.03708100 | -1.77873400 | 0.91298800  |
| O | -0.82212800 | -1.33987600 | -1.30333100 |
| F | -3.34432500 | 0.43442300  | -0.56178800 |
| F | -2.18444700 | 1.27237400  | 1.08118100  |
| F | -1.48385700 | 1.48518500  | -0.97086400 |
| C | 2.52082200  | -1.96500700 | -0.95325500 |
| H | 3.22098700  | -2.17382800 | -0.14011900 |
| H | 1.65167800  | -2.62478900 | -0.89774700 |
| H | 3.01687800  | -2.08870800 | -1.91637100 |
| C | 2.26686700  | 2.41040100  | -0.58712000 |
| H | 1.78252200  | 3.37668100  | -0.72994300 |
| H | 3.12357600  | 2.51918400  | 0.08395400  |
| H | 2.58653700  | 2.00435700  | -1.55025100 |

NTPA-1'

0 imaginary frequency

H = -1588.274310

G = -1588.340037

E(M06-2X-DCM) = -1588.411007

|   |             |             |             |
|---|-------------|-------------|-------------|
| O | -2.59178400 | -0.95511900 | 0.09328500  |
| O | -1.49321700 | 1.23766300  | -0.64836100 |
| P | -1.50161400 | 0.13719000  | 0.50109100  |
| N | -0.07221300 | -0.36073200 | 0.93003100  |
| S | 1.14628600  | -0.86822700 | -0.01712600 |
| C | 2.22934700  | 0.65462600  | -0.06693300 |
| O | 0.72003900  | -1.09526600 | -1.40594000 |

|   |             |             |             |
|---|-------------|-------------|-------------|
| O | 1.92345300  | -1.88278700 | 0.68653700  |
| F | 1.54259700  | 1.69175500  | -0.56065100 |
| F | 2.65516000  | 0.96101900  | 1.16070600  |
| F | 3.28222100  | 0.41345900  | -0.85039300 |
| O | -2.19839700 | 0.81860600  | 1.77321200  |
| H | -1.61784500 | 0.73576700  | 2.54959400  |
| C | -2.70939800 | 1.84030800  | -1.14689000 |
| H | -3.17939900 | 2.43573900  | -0.35959100 |
| H | -2.40457800 | 2.48254300  | -1.97293300 |
| H | -3.39962300 | 1.07084600  | -1.50175400 |
| C | -2.24801200 | -2.11736200 | -0.70703700 |
| H | -1.58183600 | -2.76932800 | -0.13771700 |
| H | -3.19444000 | -2.62147800 | -0.90219000 |
| H | -1.76532800 | -1.82149600 | -1.63964300 |

NTPA-1''

0 imaginary frequency

H = -1588.277547

G = -1588.339452

E(M06-2X-DCM) = -1588.401143

|   |             |             |             |
|---|-------------|-------------|-------------|
| O | -2.72829000 | -1.01929900 | 0.10716900  |
| O | -1.80703100 | 1.27908000  | -0.55690300 |
| P | -1.47857400 | -0.03958700 | 0.30057800  |
| N | -0.20651300 | -0.71725000 | -0.50771100 |
| S | 1.20061800  | -0.86377900 | 0.11259700  |
| C | 2.19104900  | 0.65350300  | -0.35880800 |
| O | 1.98963400  | -2.01450700 | -0.28201300 |
| O | 1.17694400  | -0.68627600 | 1.69471700  |
| F | 1.53560800  | 1.74076600  | 0.05756400  |
| F | 3.39107200  | 0.60856300  | 0.21115900  |
| F | 2.32040200  | 0.68947600  | -1.68217300 |
| O | -1.22359100 | 0.21038400  | 1.76152200  |
| H | 0.24861300  | -0.30616300 | 1.95830400  |
| C | -3.06062300 | -1.55316000 | -1.19211200 |
| H | -2.23259900 | -2.15692900 | -1.57168700 |
| H | -3.94441400 | -2.17432400 | -1.04334800 |
| H | -3.28551000 | -0.74450200 | -1.89418300 |
| C | -2.77088100 | 2.22097700  | -0.03538000 |
| H | -2.46828400 | 2.56079600  | 0.95823700  |
| H | -2.78068600 | 3.05799000  | -0.73422000 |
| H | -3.76515800 | 1.76593400  | 0.01354800  |

NTPA-1''-1

0 imaginary frequency

H = -1588.256429

G = -1588.321577

E(M06-2X-DCM) = -1588.388744

|   |             |             |             |
|---|-------------|-------------|-------------|
| O | -2.78629400 | -1.01859000 | 0.11990600  |
| O | -1.62086200 | 1.16140000  | -0.59006900 |
| P | -1.54209000 | -0.06553300 | 0.46660300  |
| N | -0.24373300 | -0.91361300 | -0.18444700 |
| S | 1.20819800  | -0.85402500 | 0.22726400  |
| C | 1.97991100  | 0.78931300  | -0.27216500 |
| O | 1.74033700  | -1.16702700 | 1.55079300  |
| F | 1.49353800  | 1.73700800  | 0.52465900  |
| F | 3.30509600  | 0.71358200  | -0.12882100 |
| F | 1.68219100  | 1.06339100  | -1.53716500 |
| O | -1.49552500 | 0.32440800  | 1.88873500  |
| C | -2.97350500 | -1.56468800 | -1.19719100 |
| H | -2.14786300 | -2.23595400 | -1.44951200 |
| H | -3.91164900 | -2.12087300 | -1.16408500 |
| H | -3.04005500 | -0.76558200 | -1.94212000 |
| C | -2.45204800 | 2.28907200  | -0.24731800 |
| H | -2.19789300 | 2.66308200  | 0.74751000  |
| H | -2.25420400 | 3.05233000  | -1.00170100 |
| H | -3.51055600 | 2.00951800  | -0.27570500 |
| O | 1.93724900  | -1.80833400 | -0.87586300 |
| H | 2.71572300  | -2.20271400 | -0.43454400 |

NTPA-1''-2

0 imaginary frequency

H = -1588.255141

G = -1588.319820

E(M06-2X-DCM) = -1588.388967

|   |             |             |             |
|---|-------------|-------------|-------------|
| O | -2.76773100 | -0.92428800 | 0.11491800  |
| O | -1.24702800 | 0.99991700  | -0.69068200 |
| P | -1.62453500 | 0.09322000  | 0.60348200  |
| O | -2.02461800 | 0.83889500  | 1.80918000  |
| N | -0.24911800 | -0.85562200 | 0.73628600  |
| S | 1.04877500  | -0.91170000 | -0.02205300 |
| C | 1.94758300  | 0.75501600  | -0.07649700 |
| O | 1.21801400  | -1.48514800 | -1.35875300 |
| F | 3.26393500  | 0.52091300  | -0.12671500 |
| F | 1.57860500  | 1.42083300  | -1.16314900 |
| F | 1.65699800  | 1.45660400  | 1.01236200  |
| O | 2.03750600  | -1.69097100 | 1.01140800  |
| H | 2.74589900  | -2.10614600 | 0.48068300  |
| C | -1.97042300 | 2.22774200  | -0.91388400 |

|   |             |             |             |
|---|-------------|-------------|-------------|
| H | -2.03185700 | 2.80612200  | 0.01089500  |
| H | -1.40865900 | 2.77711800  | -1.67097100 |
| H | -2.97794900 | 2.01254300  | -1.28368300 |
| C | -2.57580000 | -1.78184600 | -1.02178600 |
| H | -1.73119700 | -2.45731400 | -0.85540000 |
| H | -3.49595500 | -2.35883300 | -1.12502400 |
| H | -2.40199400 | -1.19308200 | -1.92793600 |

NTPA-1''-3

0 imaginary frequency

H = -1588.266214

G = -1588.328206

E(M06-2X-DCM) = -1588.394693

|   |             |             |             |
|---|-------------|-------------|-------------|
| O | 2.75205000  | 0.67159000  | 0.87336600  |
| O | 1.63365500  | -0.68384500 | -1.02951200 |
| P | 1.47035400  | -0.23127800 | 0.56146500  |
| O | 1.34739700  | -1.38168000 | 1.47494200  |
| N | 0.23580200  | 0.87354600  | 0.42241800  |
| S | -1.05210500 | 0.81271300  | -0.39890700 |
| C | -2.25301000 | -0.41918700 | 0.35445300  |
| O | -1.78290900 | 2.04965200  | -0.59533200 |
| F | -3.35917400 | -0.47213100 | -0.38121500 |
| F | -1.67375900 | -1.61895400 | 0.38733500  |
| F | -2.54505100 | -0.02239900 | 1.58772600  |
| O | -0.81412300 | 0.07670500  | -1.81824200 |
| H | 0.10509500  | -0.31593000 | -1.79209400 |
| C | 2.41433700  | -1.87317700 | -1.30763200 |
| H | 2.02560600  | -2.71930200 | -0.73764000 |
| H | 2.32783700  | -2.05400600 | -2.37998200 |
| H | 3.46057000  | -1.69550100 | -1.04500400 |
| C | 3.01295100  | 1.90421000  | 0.17542500  |
| H | 2.19048600  | 2.60706300  | 0.32875100  |
| H | 3.93399400  | 2.30119500  | 0.60405000  |
| H | 3.15178400  | 1.71830600  | -0.89435400 |

NTPA-1'-1

0 imaginary frequency

H = -1588.284803

G = -1588.347318

E(M06-2X-DCM) = -1588.414184

|   |             |             |             |
|---|-------------|-------------|-------------|
| O | -2.73092300 | -0.96782900 | 0.05371400  |
| O | -1.78299900 | 1.33704900  | -0.52294800 |
| P | -1.44187000 | -0.04239300 | 0.20219200  |
| N | -0.16515000 | -0.69302600 | -0.47925800 |



|   |             |             |             |
|---|-------------|-------------|-------------|
| S | 1.26076700  | -0.84811300 | 0.24594600  |
| C | 2.20589000  | 0.63959600  | -0.37032700 |
| O | 1.98020700  | -2.01774300 | -0.23506300 |
| O | 1.15238800  | -0.61992800 | 1.71477900  |
| F | 1.54728900  | 1.75507900  | -0.02200800 |
| F | 3.41795700  | 0.65691200  | 0.18369300  |
| F | 2.32407800  | 0.59809900  | -1.69629300 |
| O | -1.36218500 | 0.23098200  | 1.76037600  |
| H | -0.45327600 | -0.04218500 | 2.07980200  |
| C | -2.98710400 | -1.67669200 | -1.18317700 |
| H | -2.12418800 | -2.29265300 | -1.44412100 |
| H | -3.85943800 | -2.30054100 | -0.98911000 |
| H | -3.20325700 | -0.96932500 | -1.98920700 |
| C | -2.88108500 | 2.16199800  | -0.06677100 |
| H | -2.69583000 | 2.49734100  | 0.95657700  |
| H | -2.91149100 | 3.01568700  | -0.74366800 |
| H | -3.82273100 | 1.60809800  | -0.11722300 |

NTPA-1' -2

0 imaginary frequency

H = -1588.284268

G = -1588.346514

E(M06-2X-DCM) = -1588.414337

|   |             |             |             |
|---|-------------|-------------|-------------|
| O | 1.75256500  | 1.40406500  | 0.48386200  |
| O | 2.71189700  | -0.61373800 | -0.76276800 |
| P | 1.45846100  | -0.11433900 | 0.08079500  |
| N | 0.17385100  | -0.30649100 | -0.83098000 |
| S | -1.20455000 | -0.94461000 | -0.31186100 |
| C | -2.19117700 | 0.57615100  | 0.13701300  |
| O | -1.02805600 | -1.65336000 | 0.98665400  |
| O | -1.93755800 | -1.60175700 | -1.38215700 |
| F | -3.39559200 | 0.22756600  | 0.58181000  |
| F | -1.54279500 | 1.25328100  | 1.10083000  |
| F | -2.32229800 | 1.37464100  | -0.92632400 |
| O | 1.46820600  | -0.86738400 | 1.47491200  |
| H | 0.58095100  | -1.31294100 | 1.59861600  |
| C | 4.04249700  | -0.58968400 | -0.19491100 |
| H | 4.09170800  | -1.25723100 | 0.66893600  |
| H | 4.70598500  | -0.94491000 | -0.98311600 |
| H | 4.31625200  | 0.42768500  | 0.09798300  |
| C | 1.46449800  | 2.47640000  | -0.44585000 |
| H | 0.40653300  | 2.46246100  | -0.71501600 |
| H | 1.71084700  | 3.39701400  | 0.08306900  |
| H | 2.08150100  | 2.38300300  | -1.34416200 |

NTPA-1-1

0 imaginary frequency

H = -1588.289452

G = -1588.352581

E(M06-2X-DCM) = -1588.418235

|   |             |             |             |
|---|-------------|-------------|-------------|
| O | 2.59667500  | 1.06737400  | 0.84353500  |
| O | 2.11461300  | -0.86013000 | -0.72125000 |
| P | 1.53926300  | -0.09781900 | 0.55571500  |
| O | 1.18127300  | -0.91415000 | 1.72836800  |
| N | 0.26188100  | 0.88150800  | -0.09623100 |
| H | 0.16033400  | 1.81112500  | 0.30539200  |
| S | -1.12055900 | 0.35792800  | -0.87235000 |
| C | -2.27287100 | -0.10168700 | 0.53655500  |
| O | -0.80723900 | -0.87875400 | -1.57486700 |
| O | -1.72409900 | 1.51836400  | -1.51251600 |
| F | -1.83722100 | -1.19599800 | 1.14801500  |
| F | -2.31839800 | 0.91405200  | 1.40505100  |
| F | -3.48832200 | -0.31543400 | 0.03623600  |
| C | 1.98195000  | -2.29554800 | -0.87338100 |
| H | 1.07464600  | -2.50103600 | -1.44274400 |
| H | 2.86453300  | -2.62436200 | -1.42386600 |
| H | 1.93971000  | -2.77938800 | 0.10433400  |
| C | 3.33895000  | 1.71718500  | -0.21050100 |
| H | 2.66077800  | 2.17544000  | -0.93704000 |
| H | 3.93790900  | 2.48672400  | 0.27755700  |
| H | 3.98644600  | 0.99646700  | -0.71406300 |

NTPA-1-2

0 imaginary frequency

H = -1588.289569

G = -1588.353369

E(M06-2X-DCM) = -1588.419117

|   |             |             |             |
|---|-------------|-------------|-------------|
| O | -2.65985700 | -0.96603600 | 0.09918100  |
| O | -1.30029700 | 1.08797600  | -0.60620400 |
| P | -1.67206600 | 0.16480700  | 0.65044600  |
| O | -2.18540900 | 0.79491900  | 1.87938800  |
| N | -0.13814200 | -0.55314100 | 0.94718800  |
| H | 0.06091400  | -0.69312200 | 1.93530700  |
| S | 1.16656000  | -0.92798500 | -0.02921100 |
| C | 2.15244400  | 0.66983900  | -0.07955800 |
| O | 0.70004800  | -1.18067300 | -1.38465600 |
| O | 1.99152100  | -1.86497300 | 0.72203900  |
| F | 3.34060300  | 0.40266100  | -0.61874200 |

|   |             |             |             |
|---|-------------|-------------|-------------|
| F | 1.52896800  | 1.59123300  | -0.80552900 |
| F | 2.31587500  | 1.11676000  | 1.16797000  |
| C | -2.38503100 | -1.79423200 | -1.04968100 |
| H | -1.60239400 | -2.51875300 | -0.81370600 |
| H | -3.31963900 | -2.31103700 | -1.27115900 |
| H | -2.07178100 | -1.18988900 | -1.90411600 |
| C | -2.29236200 | 2.00577100  | -1.11716600 |
| H | -1.80164300 | 2.56258200  | -1.91558200 |
| H | -3.15131400 | 1.45833800  | -1.51713900 |
| H | -2.61849100 | 2.68565800  | -0.32607900 |

NTPA-1-3

0 imaginary frequency

H = -1588.289569

G = -1588.353370

E(M06-2X-DCM) = -1588.419117

|   |             |             |             |
|---|-------------|-------------|-------------|
| O | -2.65985800 | -0.96603600 | 0.09918200  |
| O | -1.30029700 | 1.08797500  | -0.60620300 |
| P | -1.67206600 | 0.16480700  | 0.65044700  |
| O | -2.18540900 | 0.79491900  | 1.87938800  |
| N | -0.13814200 | -0.55314100 | 0.94718800  |
| H | 0.06091300  | -0.69312800 | 1.93530700  |
| S | 1.16656100  | -0.92798400 | -0.02921200 |
| C | 2.15244500  | 0.66983900  | -0.07955800 |
| O | 0.70004800  | -1.18067300 | -1.38465600 |
| O | 1.99152100  | -1.86497300 | 0.72203900  |
| F | 3.34060400  | 0.40266000  | -0.61874200 |
| F | 1.52896900  | 1.59123300  | -0.80552900 |
| F | 2.31587500  | 1.11675900  | 1.16797100  |
| C | -2.38503400 | -1.79423000 | -1.04968300 |
| H | -1.60239300 | -2.51874800 | -0.81371200 |
| H | -3.31964000 | -2.31103700 | -1.27115700 |
| H | -2.07179000 | -1.18988500 | -1.90411900 |
| C | -2.29236100 | 2.00577100  | -1.11716600 |
| H | -1.80164200 | 2.56258000  | -1.91558400 |
| H | -3.15131500 | 1.45834100  | -1.51713600 |
| H | -2.61848700 | 2.68566100  | -0.32608000 |

AT-1

0 imaginary frequency

H = -1957.907268

G = -1958.004909

E(M06-2X-DCM) = -1958.255431

|   |             |            |             |
|---|-------------|------------|-------------|
| C | -4.19281100 | 1.94412900 | -0.12929300 |
|---|-------------|------------|-------------|

|   |             |             |             |
|---|-------------|-------------|-------------|
| C | -4.63871700 | 0.88114700  | -1.19045500 |
| H | -3.78084500 | 0.68163700  | -1.84375600 |
| H | -5.39354700 | 1.36117200  | -1.82428800 |
| C | -4.25485800 | -1.56472700 | -0.41593400 |
| C | -3.26370800 | -1.91250300 | -1.35455800 |
| C | -4.33232600 | -2.32116000 | 0.76726300  |
| C | -2.38578200 | -2.97354100 | -1.11637600 |
| H | -3.19729400 | -1.37029000 | -2.29397100 |
| C | -3.45512700 | -3.37859800 | 1.00708200  |
| H | -5.07744700 | -2.05731200 | 1.51227900  |
| C | -2.47460100 | -3.70814900 | 0.06885900  |
| H | -1.64536200 | -3.23672200 | -1.86767300 |
| H | -3.53166300 | -3.94013800 | 1.93415900  |
| H | -1.79116800 | -4.53167800 | 0.25581500  |
| C | -5.19874700 | -0.43416900 | -0.66849000 |
| C | -3.23616700 | 1.36264800  | 0.94226900  |
| H | -2.89476100 | 2.16545500  | 1.59890000  |
| H | -3.77641600 | 0.63218800  | 1.55817100  |
| N | -2.04528900 | 0.71082400  | 0.41407800  |
| C | -0.75394800 | 1.07487400  | 0.63444100  |
| N | 0.12244000  | 0.10731400  | 0.16416100  |
| C | 1.52723300  | 0.08128400  | 0.10518000  |
| C | 2.32619200  | 1.22204500  | -0.05907800 |
| C | 2.13935600  | -1.17940700 | 0.14409500  |
| C | 3.70944600  | 1.08215000  | -0.16315100 |
| C | 3.52233100  | -1.30072100 | 0.02804600  |
| H | 1.53297600  | -2.07221200 | 0.26733300  |
| C | 4.32320500  | -0.17005800 | -0.12043700 |
| H | 5.39921700  | -0.26184500 | -0.20381800 |
| C | 4.15523200  | -2.66259000 | 0.13887500  |
| C | 4.55476100  | 2.30639600  | -0.41144600 |
| F | 3.34494000  | -3.63132700 | -0.34900000 |
| F | 5.32219700  | -2.73088500 | -0.53524000 |
| F | 4.42061100  | -2.98708800 | 1.42460000  |
| F | 4.71177700  | 2.53369800  | -1.73717700 |
| F | 4.00633900  | 3.41732600  | 0.11809500  |
| F | 5.79362000  | 2.17015700  | 0.11160800  |
| S | -0.29210600 | 2.49895800  | 1.39422100  |
| C | -5.42030700 | 2.49316400  | 0.62062600  |
| H | -5.11923800 | 3.24683800  | 1.35771100  |
| H | -5.96118600 | 1.70088600  | 1.14959000  |
| H | -6.11903800 | 2.97150500  | -0.07595800 |
| C | -3.49796700 | 3.09182400  | -0.88509900 |
| H | -3.22312800 | 3.90161600  | -0.20119700 |

|   |             |             |             |
|---|-------------|-------------|-------------|
| H | -4.15956700 | 3.50605600  | -1.65570600 |
| H | -2.58017200 | 2.74847100  | -1.37432400 |
| H | 1.87159800  | 2.20138400  | -0.09259400 |
| C | -6.51227300 | -0.59891800 | -0.44916400 |
| H | -0.29888900 | -0.79489500 | -0.02975500 |
| H | -7.22286700 | 0.20170500  | -0.63530700 |
| H | -6.92309500 | -1.54301700 | -0.10227600 |
| H | -2.21231000 | -0.17874500 | -0.04406700 |

AT-1-1

0 imaginary frequency

H = -1957.905743

G = -1958.001927

E(M06-2X-DCM) = -1958.254488

|   |             |             |             |
|---|-------------|-------------|-------------|
| C | -4.28173500 | -1.64878600 | 0.60346700  |
| C | -5.10351200 | -0.63638400 | -0.26508200 |
| H | -5.77032200 | -0.09153900 | 0.41683200  |
| H | -5.76389900 | -1.22594400 | -0.91201700 |
| C | -3.67404700 | 1.53985900  | -0.59075800 |
| C | -4.14019800 | 2.18953500  | 0.56461300  |
| C | -2.52301700 | 2.06466700  | -1.21289300 |
| C | -3.49083000 | 3.31503500  | 1.07239800  |
| H | -5.02826100 | 1.82315100  | 1.06894200  |
| C | -1.87108300 | 3.18912900  | -0.70579500 |
| H | -2.13969800 | 1.59151400  | -2.11438500 |
| C | -2.35186100 | 3.81936900  | 0.44404900  |
| H | -3.87904300 | 3.79898600  | 1.96438500  |
| H | -0.98973300 | 3.57475200  | -1.21192800 |
| H | -1.84377800 | 4.69185800  | 0.84427200  |
| C | -4.38081100 | 0.35706900  | -1.16741300 |
| C | -3.21931000 | -2.40685500 | -0.23894600 |
| H | -2.83231900 | -3.25486800 | 0.32998300  |
| H | -3.68441300 | -2.80273100 | -1.15129000 |
| N | -2.06976500 | -1.60207400 | -0.62220800 |
| C | -0.81389300 | -1.68972100 | -0.10844200 |
| N | -0.05589700 | -0.58117300 | -0.46754400 |
| C | 1.31158500  | -0.32977800 | -0.25721100 |
| C | 2.29708000  | -1.32025100 | -0.37305800 |
| C | 1.69560400  | 0.99129600  | 0.00414400  |
| C | 3.63770100  | -0.97812500 | -0.20687400 |
| C | 3.04314000  | 1.31933400  | 0.14817900  |
| H | 0.93897200  | 1.76342200  | 0.10921700  |
| C | 4.02666800  | 0.33749900  | 0.05175700  |
| H | 5.07299200  | 0.59045000  | 0.17125200  |

|   |             |             |             |
|---|-------------|-------------|-------------|
| C | 3.43200200  | 2.75928700  | 0.35160800  |
| C | 4.68724800  | -2.05906900 | -0.26714800 |
| F | 3.56690400  | 3.40841000  | -0.82963700 |
| F | 2.49909800  | 3.43580900  | 1.06076300  |
| F | 4.60652200  | 2.87898600  | 1.00378700  |
| F | 4.92782300  | -2.58607900 | 0.95346000  |
| F | 4.31695100  | -3.07623900 | -1.07360700 |
| F | 5.86569700  | -1.58211600 | -0.72885700 |
| S | -0.26422700 | -2.95459500 | 0.84580200  |
| C | -5.28345300 | -2.70818300 | 1.11052100  |
| H | -5.71589000 | -3.28344600 | 0.28227100  |
| H | -6.10952400 | -2.23663600 | 1.65574700  |
| H | -4.79288800 | -3.41329200 | 1.79088500  |
| C | -3.62002600 | -0.97668500 | 1.81931700  |
| H | -2.90526900 | -0.20264800 | 1.53024200  |
| H | -3.08098800 | -1.71743200 | 2.41964500  |
| H | -4.37811500 | -0.50921000 | 2.45933200  |
| H | 2.01732300  | -2.34123700 | -0.59004600 |
| C | -4.42286700 | 0.18373600  | -2.50195800 |
| H | -0.59894800 | 0.25627600  | -0.65432000 |
| H | -4.93494200 | -0.66582800 | -2.94533000 |
| H | -3.98818700 | 0.89763500  | -3.19545400 |
| H | -2.25907600 | -0.86779600 | -1.29282300 |

AT-1-2

0 imaginary frequency

H = -1957.905743

G = -1958.001929

E(M06-2X-DCM) = -1958.254485

|   |            |             |             |
|---|------------|-------------|-------------|
| C | 4.28162500 | -1.64895500 | -0.60364100 |
| C | 5.10344200 | -0.63671500 | 0.26504800  |
| H | 5.77036200 | -0.09187100 | -0.41675500 |
| H | 5.76368300 | -1.22641600 | 0.91200200  |
| C | 3.67424300 | 1.53970000  | 0.59076600  |
| C | 4.14073500 | 2.18959900  | -0.56433200 |
| C | 2.52307000 | 2.06445500  | 1.21271200  |
| C | 3.49155600 | 3.31524300  | -1.07206200 |
| H | 5.02892100 | 1.82330100  | -1.06850500 |
| C | 1.87134300 | 3.18905400  | 0.70568100  |
| H | 2.13947100 | 1.59111200  | 2.11398100  |
| C | 2.35245400 | 3.81950500  | -0.44391800 |
| H | 3.88004300 | 3.79935000  | -1.96384500 |
| H | 0.98987900 | 3.57462600  | 1.21165200  |
| H | 1.84451400 | 4.69210100  | -0.84409000 |

|   |             |             |             |
|---|-------------|-------------|-------------|
| C | 4.38073800  | 0.35673200  | 1.16738300  |
| C | 3.21913700  | -2.40705900 | 0.23865600  |
| H | 2.83207900  | -3.25493400 | -0.33043600 |
| H | 3.68422500  | -2.80314700 | 1.15091900  |
| N | 2.06967200  | -1.60222700 | 0.62204000  |
| C | 0.81365600  | -1.68999300 | 0.10863600  |
| N | 0.05569300  | -0.58147100 | 0.46820300  |
| C | -1.31172400 | -0.32988900 | 0.25762600  |
| C | -2.29738500 | -1.32018800 | 0.37323300  |
| C | -1.69552800 | 0.99128300  | -0.00371900 |
| C | -3.63796200 | -0.97783700 | 0.20680000  |
| C | -3.04295100 | 1.31952100  | -0.14803900 |
| H | -0.93876700 | 1.76331900  | -0.10853100 |
| C | -4.02667100 | 0.33781300  | -0.05187000 |
| H | -5.07292800 | 0.59093700  | -0.17158400 |
| C | -3.43156900 | 2.75951300  | -0.35166500 |
| C | -4.68756400 | -2.05873500 | 0.26691500  |
| F | -3.56669100 | 3.40874000  | 0.82950400  |
| F | -2.49840700 | 3.43586500  | -1.06062700 |
| F | -4.60591300 | 2.87932200  | -1.00414700 |
| F | -4.31747800 | -3.07576300 | 1.07371400  |
| F | -5.86613200 | -1.58171200 | 0.72820900  |
| F | -4.92777000 | -2.58603900 | -0.95362100 |
| S | 0.26381800  | -2.95483800 | -0.84547200 |
| C | 5.28326300  | -2.70836100 | -1.11084500 |
| H | 5.71572200  | -3.28371400 | -0.28267000 |
| H | 6.10932700  | -2.23681000 | -1.65607900 |
| H | 4.79263300  | -3.41339500 | -1.79123900 |
| C | 3.61992900  | -0.97665500 | -1.81938700 |
| H | 2.90513100  | -0.20269900 | -1.53019900 |
| H | 3.08094800  | -1.71732300 | -2.41986700 |
| H | 4.37801400  | -0.50903500 | -2.45929900 |
| H | -2.01786500 | -2.34123100 | 0.59024200  |
| C | 4.42243800  | 0.18314500  | 2.50190500  |
| H | 0.59891500  | 0.25606300  | 0.65413400  |
| H | 4.93424100  | -0.66660500 | 2.94523500  |
| H | 3.98767400  | 0.89696700  | 3.19542600  |
| H | 2.25901400  | -0.86806300 | 1.29277400  |

AT-1-3

0 imaginary frequency

H = -1957.907362

G = -1958.004781

E(M06-2X-DCM) = -1958.255547

|   |             |             |             |
|---|-------------|-------------|-------------|
| C | 4.18911600  | -1.94840100 | -0.12835700 |
| C | 4.64776000  | -0.88352500 | -1.18210900 |
| H | 3.79594300  | -0.67820700 | -1.84152000 |
| H | 5.40568600  | -1.36438100 | -1.81161000 |
| C | 4.26757400  | 1.56093500  | -0.40139800 |
| C | 3.28520500  | 1.91630700  | -1.34637500 |
| C | 4.33875300  | 2.31237600  | 0.78534700  |
| C | 2.40958800  | 2.97982400  | -1.11084800 |
| H | 3.22405300  | 1.37802700  | -2.28840700 |
| C | 3.46381700  | 3.37229800  | 1.02250500  |
| H | 5.07700600  | 2.04267600  | 1.53508800  |
| C | 2.49196400  | 3.70937300  | 0.07796700  |
| H | 1.67606100  | 3.24885800  | -1.86681700 |
| H | 3.53526600  | 3.92987000  | 1.95237700  |
| H | 1.81026200  | 4.53480100  | 0.26286100  |
| C | 5.20895500  | 0.42762300  | -0.65106000 |
| C | 3.22584300  | -1.36694100 | 0.93725000  |
| H | 2.87614900  | -2.17058900 | 1.58847300  |
| H | 3.76360100  | -0.64041700 | 1.55992300  |
| N | 2.04160100  | -0.70915100 | 0.40150400  |
| C | 0.74744000  | -1.06974800 | 0.60952700  |
| N | -0.12240500 | -0.09875400 | 0.13342800  |
| C | -1.52726300 | -0.07201700 | 0.07275600  |
| C | -2.32158100 | -1.21053200 | -0.12481300 |
| C | -2.14249400 | 1.18584200  | 0.13632800  |
| C | -3.70472600 | -1.07244100 | -0.23396600 |
| C | -3.52477000 | 1.30652600  | 0.01026200  |
| H | -1.53873400 | 2.07720600  | 0.28082000  |
| C | -4.32145200 | 0.17736400  | -0.16973200 |
| H | -5.39529500 | 0.27023900  | -0.27567400 |
| C | -4.16111200 | 2.66570500  | 0.13426100  |
| C | -4.55482600 | -2.30834300 | -0.39171200 |
| F | -5.32171100 | 2.74171000  | -0.54994800 |
| F | -4.43922200 | 2.97131400  | 1.42189800  |
| F | -3.34806400 | 3.64285600  | -0.33188500 |
| F | -4.92813200 | -2.80875500 | 0.80656100  |
| F | -5.68912800 | -2.04685700 | -1.08011000 |
| F | -3.89979100 | -3.29033400 | -1.04600900 |
| S | 0.27343100  | -2.49395700 | 1.36137900  |
| C | 5.40826900  | -2.50471100 | 0.62978400  |
| H | 5.09822700  | -3.25985700 | 1.36161800  |
| H | 5.94772300  | -1.71640800 | 1.16609400  |
| H | 6.11097900  | -2.98322000 | -0.06266900 |
| C | 3.49619800  | -3.09087600 | -0.89377600 |



|   |             |             |             |
|---|-------------|-------------|-------------|
| H | 2.58383200  | -2.74236800 | -1.38945700 |
| H | 3.21255800  | -3.90186000 | -0.21489900 |
| H | 4.16260400  | -3.50510600 | -1.66023000 |
| H | -1.86258200 | -2.18577100 | -0.19501500 |
| C | 6.52141200  | 0.58644800  | -0.42127900 |
| H | 0.30110100  | 0.80462600  | -0.04998600 |
| H | 7.23026200  | -0.21626700 | -0.60505200 |
| H | 6.93324100  | 1.52765100  | -0.06778700 |
| H | 2.21521200  | 0.18121200  | -0.05265400 |

AT-1-4

0 imaginary frequency

H = -1957.905640

G = -1958.001950

E(M06-2X-DCM) = -1958.254282

|   |             |             |             |
|---|-------------|-------------|-------------|
| C | 4.29812000  | -1.62760600 | -0.59376100 |
| C | 5.09157100  | -0.60903100 | 0.29386200  |
| H | 5.76174000  | -0.05168600 | -0.37452200 |
| H | 5.74948100  | -1.19326500 | 0.94814900  |
| C | 3.62962400  | 1.54772800  | 0.60733100  |
| C | 4.10761700  | 2.21053200  | -0.53569100 |
| C | 2.46042700  | 2.05326800  | 1.21145800  |
| C | 3.45190900  | 3.32983000  | -1.04896600 |
| H | 5.00982800  | 1.85952900  | -1.02567100 |
| C | 1.80101400  | 3.17062400  | 0.69791700  |
| H | 2.06824900  | 1.57022500  | 2.10392400  |
| C | 2.29405700  | 3.81387200  | -0.43945700 |
| H | 3.84965800  | 3.82448300  | -1.93082400 |
| H | 0.90278900  | 3.53932800  | 1.18688400  |
| H | 1.78057800  | 4.68083200  | -0.84477900 |
| C | 4.34221900  | 0.37103800  | 1.18955400  |
| C | 3.24005100  | -2.41348100 | 0.22863400  |
| H | 2.86934600  | -3.25815500 | -0.35600700 |
| H | 3.70383500  | -2.81679300 | 1.13839900  |
| N | 2.07730400  | -1.62994800 | 0.61504800  |
| C | 0.82750700  | -1.72015300 | 0.08575500  |
| N | 0.06251800  | -0.61758800 | 0.44536700  |
| C | -1.30329400 | -0.35880100 | 0.23720000  |
| C | -2.29456900 | -1.34887100 | 0.29352200  |
| C | -1.68010500 | 0.97617000  | 0.04274800  |
| C | -3.63257200 | -0.98914500 | 0.14238200  |
| C | -3.02399800 | 1.31945900  | -0.09285200 |
| H | -0.91949600 | 1.74992600  | -0.00547300 |
| C | -4.01377500 | 0.33992400  | -0.05096200 |

|   |             |             |             |
|---|-------------|-------------|-------------|
| H | -5.05819800 | 0.60413500  | -0.16328800 |
| C | -3.39117900 | 2.75543100  | -0.35674100 |
| C | -4.69981600 | -2.04617100 | 0.27528400  |
| F | -4.63698500 | 3.04460200  | 0.07331600  |
| F | -2.53885600 | 3.60929000  | 0.26023500  |
| F | -3.34849400 | 3.04982000  | -1.67589000 |
| F | -5.78212000 | -1.75865900 | -0.48158100 |
| F | -4.25579300 | -3.26464000 | -0.09080100 |
| F | -5.13281600 | -2.14894300 | 1.55447800  |
| S | 0.29628600  | -2.98010800 | -0.88504400 |
| C | 5.32479200  | -2.66346800 | -1.09951200 |
| H | 4.85433300  | -3.37224100 | -1.79020400 |
| H | 5.76036100  | -3.23718400 | -0.27184200 |
| H | 6.14676000  | -2.17184100 | -1.63306300 |
| C | 3.63803900  | -0.95555000 | -1.81052000 |
| H | 4.39425100  | -0.46628600 | -2.43627900 |
| H | 2.90459100  | -0.19888100 | -1.52229400 |
| H | 3.12109800  | -1.70027200 | -2.42520100 |
| H | -2.02076000 | -2.38327100 | 0.44485600  |
| C | 4.36656700  | 0.19277400  | 2.52393900  |
| H | 0.60321400  | 0.21702400  | 0.65040800  |
| H | 4.88252300  | -0.65215800 | 2.97169200  |
| H | 3.91269100  | 0.89856200  | 3.21346000  |
| H | 2.25413900  | -0.90100900 | 1.29490500  |

TS-1-1

l imaginary frequency

H = -3546.192069

G = -3546.326390

E(M06-2X-DCM) = -3546.664642

|   |            |             |             |
|---|------------|-------------|-------------|
| O | 0.89123100 | -2.35789400 | -0.36655600 |
| O | 2.86180100 | -2.10834000 | -2.00796800 |
| P | 1.95206200 | -1.30089300 | -0.96426000 |
| O | 1.16185000 | -0.17461800 | -1.55181900 |
| N | 2.98612800 | -0.77190000 | 0.21503000  |
| S | 4.33291900 | -1.49216800 | 0.79931400  |
| C | 5.69038800 | -0.69844500 | -0.21758200 |
| F | 6.87235300 | -1.14519300 | 0.20746700  |
| F | 5.54687400 | -0.98577600 | -1.51135500 |
| F | 5.64302100 | 0.63360400  | -0.06061500 |
| C | 1.98175800 | 3.88033600  | -0.52491300 |
| C | 1.72893200 | 3.65254700  | 1.01475200  |
| H | 2.60969700 | 4.05797900  | 1.52729300  |
| H | 0.88611000 | 4.29294000  | 1.28067100  |

|   |             |             |             |
|---|-------------|-------------|-------------|
| C | 0.22212500  | 1.80280800  | 2.04795600  |
| C | -0.83683500 | 2.69397000  | 2.32959300  |
| C | -0.00287100 | 0.41978900  | 2.27067100  |
| C | -2.04563800 | 2.22980400  | 2.84176500  |
| H | -0.72111300 | 3.75879500  | 2.17392500  |
| C | -1.22033700 | -0.04142400 | 2.74851700  |
| H | 0.77180000  | -0.29855500 | 2.02692200  |
| C | -2.24348600 | 0.86622200  | 3.04974900  |
| H | -2.84028200 | 2.93719900  | 3.05578100  |
| H | -1.38834700 | -1.10765700 | 2.86479400  |
| H | -3.19519700 | 0.50570200  | 3.42922800  |
| C | 1.53056100  | 2.26245400  | 1.58084900  |
| C | 0.66949200  | 3.75549300  | -1.33487900 |
| H | 0.89314800  | 4.00398700  | -2.38396300 |
| H | -0.06827300 | 4.48025700  | -0.98375000 |
| N | 0.05690400  | 2.44574200  | -1.26016700 |
| C | -1.27742600 | 2.20142500  | -1.12609300 |
| N | -1.53914700 | 0.85008300  | -1.20122300 |
| C | -2.67668500 | 0.10704300  | -0.85004500 |
| C | -4.00061700 | 0.56206100  | -0.94568200 |
| C | -2.43912500 | -1.20407100 | -0.40705500 |
| C | -5.04625300 | -0.28179300 | -0.56767800 |
| C | -3.49660100 | -2.02824600 | -0.03158800 |
| H | -1.41979600 | -1.57319200 | -0.34380700 |
| C | -4.81373100 | -1.57651600 | -0.10180100 |
| H | -5.63703500 | -2.21861800 | 0.18519200  |
| C | -3.17657200 | -3.38356000 | 0.53480000  |
| C | -6.45913200 | 0.24162200  | -0.61335900 |
| F | -2.21634200 | -4.01934900 | -0.18229600 |
| F | -4.25093400 | -4.19398700 | 0.57927700  |
| F | -2.69702600 | -3.29018700 | 1.80486500  |
| F | -7.35552100 | -0.75277000 | -0.80554300 |
| F | -6.63423600 | 1.14337700  | -1.60092700 |
| F | -6.79733300 | 0.85385900  | 0.54617800  |
| S | -2.42402900 | 3.41332700  | -0.87361000 |
| C | 2.44769400  | 5.34580400  | -0.66800300 |
| H | 3.41280000  | 5.50128500  | -0.17301400 |
| H | 2.56967600  | 5.60906900  | -1.72466700 |
| H | 1.72421500  | 6.04394300  | -0.23064800 |
| C | 3.07625900  | 2.96122100  | -1.09635900 |
| H | 3.27580900  | 3.23378900  | -2.13964400 |
| H | 4.01730000  | 3.06963300  | -0.54564800 |
| H | 2.80256800  | 1.90335800  | -1.08007100 |
| H | -4.20330200 | 1.55948400  | -1.30771400 |

|   |             |             |             |
|---|-------------|-------------|-------------|
| C | 2.65922700  | 1.43746900  | 1.74664600  |
| H | -0.70238000 | 0.27225800  | -1.30920300 |
| H | 3.62978900  | 1.90291900  | 1.58588700  |
| H | 2.65471200  | 0.76455200  | 2.60451300  |
| O | 4.38359800  | -2.92487600 | 0.50921500  |
| H | 0.64868800  | 1.64489800  | -1.47842300 |
| O | 4.55292500  | -0.99476000 | 2.15812500  |
| H | 2.69425700  | 0.44167700  | 0.87947900  |
| C | 1.26137500  | -3.60117900 | 0.27039000  |
| H | 1.74460000  | -3.40692900 | 1.23083500  |
| H | 0.32484300  | -4.13954300 | 0.41603600  |
| H | 1.94220500  | -4.17377600 | -0.36333200 |
| C | 2.28853800  | -2.55008200 | -3.25696000 |
| H | 1.89296200  | -1.69703800 | -3.81418400 |
| H | 3.10258000  | -3.01844600 | -3.81073600 |
| H | 1.49243400  | -3.27939600 | -3.07816300 |

TS-1-1-1

1 imaginary frequency

H = -3546.183571

G = -3546.319471

E(M06-2X-DCM) = -3546.656259

|   |             |             |             |
|---|-------------|-------------|-------------|
| O | 5.92818600  | 0.00067900  | -1.07980300 |
| O | 5.16090900  | -2.21068300 | -0.01532200 |
| P | 5.06727200  | -0.60530500 | 0.13704200  |
| O | 5.50976200  | -0.02519100 | 1.42351200  |
| N | 3.43082100  | -0.31331900 | -0.12831700 |
| S | 2.36251800  | -1.08538500 | -1.03678100 |
| C | 1.86356500  | -2.63682000 | -0.08610600 |
| F | 0.61923300  | -2.97991300 | -0.44266000 |
| F | 2.68547900  | -3.64320900 | -0.35236200 |
| F | 1.88062600  | -2.38997800 | 1.23372500  |
| C | 1.89888900  | 3.97001800  | -0.29274100 |
| C | 1.75810400  | 3.63928200  | 1.24299600  |
| H | 2.68212500  | 3.99836100  | 1.70979300  |
| H | 0.95166800  | 4.27200200  | 1.61871200  |
| C | 0.25650500  | 1.72211300  | 2.14436900  |
| C | -0.81964100 | 2.59263700  | 2.43009400  |
| C | 0.04025700  | 0.33132100  | 2.31986100  |
| C | -2.03576600 | 2.10156900  | 2.89647800  |
| H | -0.71464200 | 3.66307000  | 2.30930100  |
| C | -1.18265400 | -0.15651500 | 2.75563600  |
| H | 0.82414700  | -0.37197200 | 2.07004100  |
| C | -2.22359000 | 0.73000800  | 3.05836500  |

|   |             |             |             |
|---|-------------|-------------|-------------|
| H | -2.84291700 | 2.79424000  | 3.11157600  |
| H | -1.34134200 | -1.22745200 | 2.83917700  |
| H | -3.17977200 | 0.34762000  | 3.40355400  |
| C | 1.56878700  | 2.21535700  | 1.72470400  |
| C | 0.55630700  | 3.84361900  | -1.04828000 |
| H | 0.71705200  | 4.18282600  | -2.08327000 |
| H | -0.19230100 | 4.50857400  | -0.61230500 |
| N | -0.01078200 | 2.50775500  | -1.04882500 |
| C | -1.34564900 | 2.22896700  | -0.99856300 |
| N | -1.58132000 | 0.87704100  | -1.12360300 |
| C | -2.72957100 | 0.11280600  | -0.85233800 |
| C | -4.04999300 | 0.54658600  | -1.03866700 |
| C | -2.49995800 | -1.19521500 | -0.39994900 |
| C | -5.10421000 | -0.31662000 | -0.73526500 |
| C | -3.56469500 | -2.03906700 | -0.09791000 |
| H | -1.48179900 | -1.54939200 | -0.27682600 |
| C | -4.88088100 | -1.60814700 | -0.25654200 |
| H | -5.71033300 | -2.26566100 | -0.02786600 |
| C | -3.25982900 | -3.39061200 | 0.48773800  |
| C | -6.51964600 | 0.18227900  | -0.87854400 |
| F | -2.21416300 | -3.98393300 | -0.12823600 |
| F | -4.31054500 | -4.23119500 | 0.41652700  |
| F | -2.92292400 | -3.28919500 | 1.80291400  |
| F | -7.38280400 | -0.82724000 | -1.13164700 |
| F | -6.64089300 | 1.08147300  | -1.87662200 |
| F | -6.94696400 | 0.78810900  | 0.25426800  |
| S | -2.52754700 | 3.41072700  | -0.78265200 |
| C | 2.29697500  | 5.46121100  | -0.36614900 |
| H | 3.27359200  | 5.62907300  | 0.10104000  |
| H | 2.36636000  | 5.78967800  | -1.40910500 |
| H | 1.56327700  | 6.10091700  | 0.13823600  |
| C | 3.00164900  | 3.14037600  | -0.97248300 |
| H | 3.13796800  | 3.48238000  | -2.00534400 |
| H | 3.96185200  | 3.25919800  | -0.45765900 |
| H | 2.78199000  | 2.07093800  | -1.00263200 |
| H | -4.24508000 | 1.54102500  | -1.41235000 |
| C | 2.71346900  | 1.40105800  | 1.84584200  |
| H | -0.74043600 | 0.30560600  | -1.16486600 |
| H | 3.67695300  | 1.90891300  | 1.82855400  |
| H | 2.67918200  | 0.60639100  | 2.59048300  |
| O | 2.85379500  | -1.56684400 | -2.32785700 |
| H | 0.61816600  | 1.73448600  | -1.24730200 |
| O | 1.12821500  | -0.26504400 | -0.99991700 |
| H | 2.90082900  | 0.63226500  | 0.81013800  |

|   |            |             |             |
|---|------------|-------------|-------------|
| C | 5.78585000 | -0.41296600 | -2.45133800 |
| H | 4.84620100 | -0.04363800 | -2.86775200 |
| H | 6.63215500 | 0.02424800  | -2.98403600 |
| H | 5.80942800 | -1.50249500 | -2.53756400 |
| C | 6.35828400 | -2.88297200 | 0.42547400  |
| H | 6.58603200 | -2.61140300 | 1.45937500  |
| H | 6.15040300 | -3.95116700 | 0.35113700  |
| H | 7.20392000 | -2.62411800 | -0.21988100 |

TS-1-2

l imaginary frequency

H = -3546.187819

G = -3546.322496

E(M06-2X-DCM) = -3546.663485

|   |             |             |             |
|---|-------------|-------------|-------------|
| O | 4.27518300  | 2.00852100  | -0.93955100 |
| O | 4.91747600  | 0.97948300  | 1.34624300  |
| P | 3.71458600  | 1.16062000  | 0.30063200  |
| O | 3.38777600  | -0.26859800 | -0.19543700 |
| N | 2.58282000  | 2.00234500  | 1.05660400  |
| S | 1.13630700  | 2.30774600  | 0.45321400  |
| C | 1.19534600  | 4.13654100  | 0.07804700  |
| F | 0.02980200  | 4.50335600  | -0.45903500 |
| F | 2.18164100  | 4.39695700  | -0.78500600 |
| F | 1.40203900  | 4.82796400  | 1.20071500  |
| C | 2.74125000  | -3.91922200 | -1.21365400 |
| C | 2.06610300  | -4.08114000 | 0.19298100  |
| H | 2.63195700  | -4.86457300 | 0.71951100  |
| H | 1.06724700  | -4.47390500 | -0.00203700 |
| C | 0.66602600  | -2.55133900 | 1.72318900  |
| C | -0.37227600 | -3.49970200 | 1.84952800  |
| C | 0.42871700  | -1.23938600 | 2.19448800  |
| C | -1.58290800 | -3.15352500 | 2.44317900  |
| H | -0.22775500 | -4.52068000 | 1.51683600  |
| C | -0.79739400 | -0.88610100 | 2.74203700  |
| H | 1.18462500  | -0.47031400 | 2.08090700  |
| C | -1.80680400 | -1.84526500 | 2.87594500  |
| H | -2.36359600 | -3.90172300 | 2.54297700  |
| H | -0.96619000 | 0.14508300  | 3.03394300  |
| H | -2.77341200 | -1.56880500 | 3.28535800  |
| C | 1.96893100  | -2.91426500 | 1.15381400  |
| C | 1.88103400  | -3.01203400 | -2.15555500 |
| H | 2.54516700  | -2.56277300 | -2.90489800 |
| H | 1.15599300  | -3.63345400 | -2.68269200 |
| N | 1.11130400  | -1.94720500 | -1.52784700 |

|   |             |             |             |
|---|-------------|-------------|-------------|
| C | -0.26341900 | -1.91412500 | -1.52623000 |
| N | -0.75587700 | -0.68784300 | -1.17597200 |
| C | -2.07400300 | -0.26887600 | -0.89988100 |
| C | -3.07374700 | -1.10013700 | -0.38120800 |
| C | -2.34735900 | 1.09520500  | -1.08362700 |
| C | -4.31787300 | -0.56035700 | -0.05251200 |
| C | -3.59528000 | 1.61512900  | -0.75206700 |
| H | -1.57189300 | 1.75085200  | -1.46251000 |
| C | -4.59637400 | 0.79347700  | -0.23400800 |
| H | -5.56489900 | 1.20026100  | 0.02953000  |
| C | -3.87675600 | 3.07237100  | -1.00777000 |
| C | -5.33495500 | -1.45190300 | 0.60733800  |
| F | -2.76453100 | 3.82904200  | -0.88934400 |
| F | -4.35896600 | 3.27507200  | -2.25696000 |
| F | -4.79827700 | 3.56269900  | -0.14897900 |
| F | -6.59279900 | -0.98216700 | 0.46943600  |
| F | -5.30994000 | -2.70714500 | 0.11402000  |
| F | -5.10463500 | -1.55921700 | 1.94551000  |
| S | -1.20516200 | -3.25930300 | -1.92180900 |
| H | -2.87972600 | -2.15166100 | -0.23153800 |
| C | 3.11605600  | -2.21502600 | 1.54728300  |
| H | -0.08475300 | 0.08223300  | -1.11710800 |
| H | 4.07876100  | -2.68196800 | 1.35580800  |
| H | 3.07047300  | -1.65743700 | 2.48135800  |
| O | 0.91010700  | 1.67905000  | -0.87720200 |
| H | 1.61193400  | -1.08736100 | -1.31514700 |
| O | 0.09618500  | 2.15297600  | 1.47211400  |
| H | 3.19879500  | -1.19257100 | 0.65591600  |
| C | 2.75442700  | -5.33189000 | -1.84211500 |
| H | 3.42677400  | -6.00354200 | -1.29521600 |
| H | 1.75278200  | -5.77541500 | -1.85055400 |
| H | 3.10738500  | -5.28359900 | -2.87901700 |
| C | 4.20058100  | -3.42176700 | -1.16924800 |
| H | 4.80507700  | -4.01092800 | -0.46865900 |
| H | 4.65003600  | -3.54387400 | -2.16231600 |
| H | 4.28629100  | -2.36629800 | -0.90560000 |
| C | 5.19342900  | 1.42282900  | -1.88445700 |
| H | 4.72080700  | 0.58370100  | -2.40017400 |
| H | 5.43550400  | 2.21292500  | -2.59607400 |
| H | 6.10389000  | 1.08563900  | -1.37919700 |
| C | 5.35238600  | 2.08927900  | 2.16238000  |
| H | 4.51931100  | 2.46216000  | 2.76184400  |
| H | 6.14237200  | 1.69720700  | 2.80415600  |
| H | 5.74855100  | 2.89219500  | 1.53336000  |

TS-1-2-1

l imaginary frequency

H = -3546.175647

G = -3546.310796

E(M06-2X-DCM) = -3546.652195

|   |             |             |             |
|---|-------------|-------------|-------------|
| O | 4.94922100  | -0.36401100 | 1.77044300  |
| O | 3.09886500  | -1.72782700 | 2.93621400  |
| P | 3.35925300  | -0.52372500 | 1.90533700  |
| O | 2.87188900  | 0.79959000  | 2.52485300  |
| N | 2.59440200  | -1.02673700 | 0.58410300  |
| S | 2.86775200  | -0.78253600 | -0.95163100 |
| C | 2.96629800  | -2.52951400 | -1.60136500 |
| F | 3.23698200  | -2.49758100 | -2.90778800 |
| F | 3.94269200  | -3.19356900 | -0.96855600 |
| F | 1.80887000  | -3.16690200 | -1.40893200 |
| C | 1.19224700  | 4.51006000  | -1.43986400 |
| C | 1.09048700  | 4.38633200  | 0.13583500  |
| H | 2.08895800  | 4.61986200  | 0.52912700  |
| H | 0.42891900  | 5.17529900  | 0.49899900  |
| C | -0.59373100 | 2.89790800  | 1.40836400  |
| C | -1.64953500 | 3.82109000  | 1.24789900  |
| C | -0.81886600 | 1.77259000  | 2.23929100  |
| C | -2.88192800 | 3.61349300  | 1.86198700  |
| H | -1.53084300 | 4.68621600  | 0.60719500  |
| C | -2.04783500 | 1.56966900  | 2.84937800  |
| H | -0.01336500 | 1.06979900  | 2.42157500  |
| C | -3.08856000 | 2.48636800  | 2.65641700  |
| H | -3.68694000 | 4.32338000  | 1.69973500  |
| H | -2.20396600 | 0.69485200  | 3.47286200  |
| H | -4.05576500 | 2.31192700  | 3.11819200  |
| C | 0.68860600  | 3.05440700  | 0.72060800  |
| C | -0.02560700 | 3.89252700  | -2.17247500 |
| H | 0.08504800  | 4.09075600  | -3.24898300 |
| H | -0.95731400 | 4.37139500  | -1.86284000 |
| N | -0.18174900 | 2.46818000  | -1.93048700 |
| C | -1.37366500 | 1.81006000  | -1.80522200 |
| N | -1.18487600 | 0.47530600  | -1.52851000 |
| C | -2.07602700 | -0.50306500 | -1.05356200 |
| C | -3.26318800 | -0.21987800 | -0.36771500 |
| C | -1.67326400 | -1.84165300 | -1.19826200 |
| C | -4.01963100 | -1.26517300 | 0.16407400  |
| C | -2.44778400 | -2.87026800 | -0.67044700 |
| H | -0.73897900 | -2.07174200 | -1.69998600 |



|   |             |             |             |
|---|-------------|-------------|-------------|
| C | -3.63098500 | -2.59454900 | 0.01836300  |
| H | -4.22532400 | -3.39580800 | 0.43918600  |
| C | -2.03311200 | -4.30187900 | -0.88967200 |
| C | -5.22792600 | -0.90857000 | 0.98844600  |
| F | -2.42153900 | -5.09579500 | 0.13347400  |
| F | -0.69491200 | -4.42812400 | -1.01744500 |
| F | -2.58704000 | -4.81288000 | -2.01364900 |
| F | -4.86297800 | -0.39042200 | 2.19367800  |
| F | -6.01106400 | -1.97707500 | 1.24346100  |
| F | -5.99322400 | 0.02616600  | 0.38827200  |
| S | -2.86152900 | 2.57744300  | -1.98362700 |
| C | 1.19200200  | 6.02223300  | -1.75190300 |
| H | 2.03036200  | 6.52298800  | -1.25443800 |
| H | 1.29284400  | 6.19659400  | -2.82887300 |
| H | 0.26444400  | 6.50245200  | -1.41901800 |
| C | 2.50788800  | 3.92003600  | -1.99252500 |
| H | 2.59676200  | 4.15684400  | -3.05917400 |
| H | 3.37578400  | 4.35598600  | -1.48431700 |
| H | 2.59001800  | 2.83347400  | -1.90123500 |
| H | -3.58429200 | 0.80431800  | -0.24369100 |
| C | 1.57771800  | 1.97670700  | 0.62759700  |
| H | -0.22504000 | 0.13480900  | -1.60166600 |
| H | 1.10977500  | 1.00233100  | 0.49690100  |
| H | 2.44214200  | 2.12663000  | -0.01530600 |
| O | 4.15093900  | -0.14484300 | -1.28753100 |
| H | 0.65755100  | 1.89716500  | -1.96100500 |
| O | 1.66818200  | -0.23995900 | -1.64289100 |
| H | 2.19855400  | 1.56269800  | 1.72192600  |
| C | 5.78203500  | -1.42605300 | 1.25509000  |
| H | 5.73544200  | -1.42883200 | 0.16532100  |
| H | 6.79577900  | -1.19715500 | 1.58729900  |
| H | 5.47199900  | -2.39598500 | 1.65524000  |
| C | 3.36075800  | -1.52524100 | 4.33927300  |
| H | 2.74719600  | -0.70830700 | 4.72700800  |
| H | 3.09691100  | -2.46237900 | 4.83104800  |
| H | 4.41933000  | -1.30323200 | 4.50825200  |

TS-1-2-2

l imaginary frequency

H = -3546.185483

G = -3546.316633

E(M06-2X-DCM) = -3546.657946

|   |            |             |            |
|---|------------|-------------|------------|
| O | 3.01961900 | -1.75551400 | 2.53494100 |
| O | 0.82943600 | -1.78801200 | 1.36961200 |

|   |             |             |             |
|---|-------------|-------------|-------------|
| P | 2.07536300  | -0.82590400 | 1.62300900  |
| O | 1.69112400  | 0.42001100  | 2.44429300  |
| N | 2.75016000  | -0.39877900 | 0.23096100  |
| S | 2.98942300  | -1.22221000 | -1.12466200 |
| C | 4.12312700  | -2.64878600 | -0.69118300 |
| F | 4.48630600  | -3.28116000 | -1.80502200 |
| F | 5.21973400  | -2.18874800 | -0.07036000 |
| F | 3.49868700  | -3.50770900 | 0.12173800  |
| C | 2.50984900  | 3.73893700  | -0.97106900 |
| C | 1.53876200  | 4.38784900  | 0.08209500  |
| H | 2.12550300  | 5.15652100  | 0.60416300  |
| H | 0.77436100  | 4.90402100  | -0.50010700 |
| C | -0.57622700 | 3.45118300  | 1.23693600  |
| C | -1.42944000 | 4.40701000  | 0.64509100  |
| C | -1.17252400 | 2.38075100  | 1.94684700  |
| C | -2.81229700 | 4.31377800  | 0.78115000  |
| H | -1.02005400 | 5.25286900  | 0.10660500  |
| C | -2.55277400 | 2.27099200  | 2.04446100  |
| H | -0.54665900 | 1.60564500  | 2.37533500  |
| C | -3.37995000 | 3.24268100  | 1.46927100  |
| H | -3.44590900 | 5.06936600  | 0.32691900  |
| H | -2.99502800 | 1.41839200  | 2.54955800  |
| H | -4.45860400 | 3.14201000  | 1.53797600  |
| C | 0.88512900  | 3.56336000  | 1.16880000  |
| C | 1.72806600  | 2.84675600  | -1.96241200 |
| H | 2.44327200  | 2.42656100  | -2.68319900 |
| H | 1.00079000  | 3.44463800  | -2.51497900 |
| N | 0.99341000  | 1.75601100  | -1.34208300 |
| C | -0.28432900 | 1.39234300  | -1.66538200 |
| N | -0.54932100 | 0.09175500  | -1.27923400 |
| C | -1.76201000 | -0.55495900 | -1.01514600 |
| C | -2.96715700 | 0.10936500  | -0.74625500 |
| C | -1.72470300 | -1.95764400 | -0.93204500 |
| C | -4.09622200 | -0.62489300 | -0.38382100 |
| C | -2.86530700 | -2.67040700 | -0.57131500 |
| H | -0.79654100 | -2.48039100 | -1.14069100 |
| C | -4.06591900 | -2.01568200 | -0.29226400 |
| H | -4.95202400 | -2.57475800 | -0.01890200 |
| C | -2.77066500 | -4.16175700 | -0.39982100 |
| C | -5.34253000 | 0.12200300  | 0.00828500  |
| F | -1.90595000 | -4.72354300 | -1.26683100 |
| F | -3.96460500 | -4.77017200 | -0.55459500 |
| F | -2.33173300 | -4.48482700 | 0.85087100  |
| F | -6.45466200 | -0.62937300 | -0.12319100 |

|   |             |             |             |
|---|-------------|-------------|-------------|
| F | -5.51785800 | 1.24699800  | -0.71492900 |
| F | -5.29126800 | 0.51296200  | 1.31550200  |
| S | -1.37084300 | 2.41102000  | -2.44696100 |
| C | 3.08754300  | 4.90967400  | -1.79696200 |
| H | 3.70708800  | 5.56339100  | -1.17242500 |
| H | 3.71905600  | 4.52926600  | -2.60744800 |
| H | 2.29482300  | 5.51891500  | -2.24704700 |
| C | 3.68395700  | 2.97466400  | -0.33461100 |
| H | 4.36387700  | 2.62537700  | -1.11940000 |
| H | 4.25637400  | 3.62741700  | 0.33652200  |
| H | 3.37349100  | 2.08909300  | 0.22313200  |
| H | -3.01931700 | 1.18523300  | -0.82241200 |
| C | 1.66723400  | 2.99458800  | 2.18750800  |
| H | 0.25494200  | -0.53798700 | -1.26980500 |
| H | 2.71661900  | 3.27784800  | 2.21949900  |
| H | 1.19859100  | 2.93726200  | 3.17124700  |
| O | 3.75684600  | -0.38173000 | -2.04526900 |
| H | 1.56228600  | 1.06834800  | -0.85093900 |
| O | 1.75243600  | -1.86396300 | -1.61656800 |
| H | 1.70234400  | 1.64359800  | 2.08722300  |
| C | 4.25507900  | -1.23240300 | 3.06078100  |
| H | 4.06817100  | -0.32406400 | 3.64075900  |
| H | 4.66124200  | -2.01031500 | 3.70851500  |
| H | 4.95232500  | -1.02716800 | 2.24459300  |
| C | 0.12305200  | -2.43046600 | 2.45607900  |
| H | -0.30009400 | -1.67765100 | 3.12730800  |
| H | -0.67251400 | -3.01170600 | 1.99171100  |
| H | 0.80210100  | -3.08685300 | 3.00478100  |

TS-1-2-3

l imaginary frequency

H = -3546.184309

G = -3546.318283

E(M06-2X-DCM) = -3546.658903

|   |            |             |             |
|---|------------|-------------|-------------|
| O | 4.81556200 | 0.42602600  | -1.43907100 |
| O | 5.01528000 | -1.79381600 | -0.14931600 |
| P | 4.17682100 | -0.43099500 | -0.23373500 |
| O | 4.40429100 | 0.41692200  | 1.02023300  |
| N | 2.61607200 | -0.76563700 | -0.47822800 |
| S | 1.98319600 | -1.98935000 | -1.29600500 |
| C | 1.69991300 | -3.30693600 | 0.00343400  |
| F | 1.28087000 | -4.42621300 | -0.58380500 |
| F | 2.82180800 | -3.55573400 | 0.68375000  |
| F | 0.75847700 | -2.89263400 | 0.87016900  |

|   |             |             |             |
|---|-------------|-------------|-------------|
| C | 2.17913400  | 3.90536300  | 0.07710000  |
| C | 1.42699000  | 3.56053800  | 1.41277500  |
| H | 1.73853900  | 4.32890300  | 2.13546800  |
| H | 0.36986200  | 3.71529600  | 1.19907100  |
| C | 0.46720400  | 1.37661800  | 2.39002200  |
| C | -0.83114100 | 1.91459800  | 2.52948600  |
| C | 0.63722800  | -0.01351200 | 2.58765400  |
| C | -1.90639200 | 1.09894000  | 2.87152500  |
| H | -1.00366900 | 2.97572300  | 2.39944900  |
| C | -0.44471900 | -0.82580000 | 2.89931900  |
| H | 1.61201900  | -0.46289500 | 2.43423800  |
| C | -1.72155400 | -0.27289800 | 3.04725800  |
| H | -2.89434300 | 1.53580800  | 2.98000900  |
| H | -0.29872900 | -1.89556300 | 3.00689400  |
| H | -2.56775900 | -0.91681200 | 3.26622100  |
| C | 1.62360500  | 2.23366200  | 2.10749200  |
| C | 1.73734300  | 2.97657500  | -1.12228800 |
| H | 2.63642200  | 2.53724800  | -1.56706700 |
| H | 1.25405000  | 3.59344100  | -1.88380100 |
| N | 0.84928200  | 1.85733800  | -0.83653200 |
| C | -0.51119400 | 1.89687900  | -0.96171200 |
| N | -1.06381700 | 0.64370200  | -1.00622700 |
| C | -2.38463600 | 0.20257500  | -0.79996500 |
| C | -3.53597200 | 0.95460300  | -1.07130100 |
| C | -2.52467700 | -1.10709000 | -0.30995500 |
| C | -4.79400600 | 0.40540900  | -0.81410800 |
| C | -3.78775500 | -1.63391200 | -0.05799100 |
| H | -1.64053000 | -1.70522900 | -0.11717800 |
| C | -4.93792000 | -0.88243700 | -0.30229100 |
| H | -5.92028000 | -1.29732600 | -0.11310000 |
| C | -3.89894900 | -2.99100200 | 0.58101900  |
| C | -6.01904800 | 1.25128400  | -1.04948200 |
| F | -2.91962500 | -3.82674200 | 0.17881100  |
| F | -5.08108800 | -3.58426400 | 0.31729600  |
| F | -3.80083100 | -2.90426200 | 1.93729100  |
| F | -7.11106000 | 0.49486400  | -1.30110200 |
| F | -5.85978200 | 2.09502700  | -2.08983600 |
| F | -6.31009100 | 2.01095200  | 0.03362200  |
| S | -1.36437600 | 3.35428600  | -1.02856400 |
| C | 1.77438800  | 5.35994200  | -0.25652600 |
| H | 2.10614700  | 6.05186500  | 0.52706100  |
| H | 2.24460600  | 5.67555700  | -1.19526300 |
| H | 0.69088300  | 5.44995500  | -0.37525800 |
| C | 3.71504000  | 3.86858400  | 0.20636200  |

|   |             |             |             |
|---|-------------|-------------|-------------|
| H | 4.16563500  | 4.26688900  | -0.71079600 |
| H | 4.06048700  | 4.49954800  | 1.03463200  |
| H | 4.11378600  | 2.86128300  | 0.34467500  |
| H | -3.44531000 | 1.95031700  | -1.47996300 |
| C | 2.89497100  | 1.85187500  | 2.56094200  |
| H | -0.40301300 | -0.12929600 | -1.11583800 |
| H | 3.64663300  | 2.63668700  | 2.62036400  |
| H | 2.93181100  | 1.14397200  | 3.38828900  |
| O | 2.86419100  | -2.60483100 | -2.29236500 |
| H | 1.29896200  | 0.94377500  | -0.76242700 |
| O | 0.61529600  | -1.60959200 | -1.70077900 |
| H | 3.50283200  | 1.09663400  | 1.64016600  |
| C | 4.76876700  | -0.04632300 | -2.80461000 |
| H | 3.74279500  | -0.02126800 | -3.17998400 |
| H | 5.39514600  | 0.63975400  | -3.37616700 |
| H | 5.15310900  | -1.06601500 | -2.87952000 |
| C | 6.40423900  | -1.77109800 | 0.24155000  |
| H | 6.50435700  | -1.36664700 | 1.25186000  |
| H | 6.73964400  | -2.80820500 | 0.21400100  |
| H | 6.99150100  | -1.17050300 | -0.45964100 |

TS-1-3

l imaginary frequency

H = -3546.180537

G = -3546.315210

E(M06-2X-DCM) = -3546.652887

|   |             |             |             |
|---|-------------|-------------|-------------|
| O | 0.68417700  | -2.41512800 | -0.32409600 |
| O | 2.65785600  | -2.49011200 | -1.98232900 |
| P | 1.73802800  | -1.48823300 | -1.11861900 |
| O | 0.95445100  | -0.51042900 | -1.93491000 |
| N | 2.75323600  | -0.76360700 | -0.06307200 |
| S | 4.09843100  | -1.13810300 | 0.59755500  |
| C | 5.48328500  | -0.92913600 | -0.65744400 |
| F | 5.30655300  | 0.20798100  | -1.33676100 |
| F | 6.65162600  | -0.88695900 | -0.01916400 |
| F | 5.47700700  | -1.95498100 | -1.50533900 |
| C | 2.17530000  | 3.68675200  | -0.38199000 |
| C | 1.70806600  | 3.62491800  | 1.13313000  |
| H | 2.31878500  | 4.35860300  | 1.67015400  |
| H | 0.68112800  | 3.99418300  | 1.15611500  |
| C | 0.63916600  | 1.53358700  | 2.26622800  |
| C | -0.66781400 | 2.06240400  | 2.22996300  |
| C | 0.79642300  | 0.19001700  | 2.68472800  |
| C | -1.76417700 | 1.28627200  | 2.59951700  |

|   |             |             |             |
|---|-------------|-------------|-------------|
| H | -0.84807100 | 3.08222300  | 1.91622800  |
| C | -0.30013800 | -0.58474500 | 3.03400900  |
| H | 1.78272400  | -0.25770500 | 2.69188100  |
| C | -1.58873100 | -0.03943800 | 2.99442100  |
| H | -2.75825400 | 1.71898300  | 2.55133300  |
| H | -0.15655500 | -1.62033900 | 3.32837300  |
| H | -2.44616500 | -0.65651200 | 3.24474300  |
| C | 1.81858700  | 2.34816500  | 1.94692500  |
| C | 0.97525700  | 3.51330800  | -1.35016300 |
| H | 1.35803300  | 3.61966600  | -2.37610400 |
| H | 0.24691300  | 4.31031300  | -1.18702900 |
| N | 0.25844900  | 2.25703500  | -1.24336800 |
| C | -1.09227000 | 2.13647800  | -1.10176200 |
| N | -1.49933400 | 0.83172900  | -1.25523200 |
| C | -2.70254500 | 0.21208900  | -0.87180600 |
| C | -3.97336500 | 0.77807800  | -1.04232600 |
| C | -2.59413900 | -1.07640700 | -0.32688300 |
| C | -5.10367900 | 0.06449300  | -0.63792800 |
| C | -3.73288600 | -1.77100500 | 0.07308200  |
| H | -1.61323300 | -1.52405900 | -0.20247700 |
| C | -5.00058000 | -1.20699600 | -0.07367400 |
| H | -5.88701600 | -1.74998100 | 0.23084100  |
| C | -3.57169900 | -3.09351600 | 0.76923500  |
| C | -6.46084300 | 0.70612500  | -0.77179300 |
| F | -2.50828200 | -3.79181800 | 0.30304700  |
| F | -4.66015100 | -3.87820700 | 0.64041000  |
| F | -3.36353800 | -2.92956400 | 2.10419700  |
| F | -7.44022200 | -0.21707200 | -0.90680300 |
| F | -6.52820800 | 1.52878000  | -1.83909300 |
| F | -6.76884100 | 1.44665800  | 0.31848000  |
| S | -2.11920600 | 3.43483700  | -0.74930000 |
| C | 2.70177400  | 5.11978800  | -0.61851200 |
| H | 3.61519700  | 5.30103800  | -0.04067400 |
| H | 2.94086600  | 5.27579500  | -1.67679700 |
| H | 1.96009800  | 5.87350400  | -0.32835700 |
| C | 3.28861100  | 2.68555000  | -0.71962600 |
| H | 3.61717000  | 2.83433000  | -1.75542000 |
| H | 4.16718800  | 2.82394900  | -0.07960900 |
| H | 2.96185600  | 1.64778600  | -0.61889400 |
| H | -4.07208200 | 1.75828700  | -1.48608400 |
| C | 3.06144800  | 2.00176800  | 2.47996700  |
| H | -0.74104900 | 0.17150500  | -1.45074600 |
| H | 3.86211300  | 2.73518400  | 2.40134000  |
| H | 3.06963200  | 1.43456300  | 3.41048600  |

|   |            |             |             |
|---|------------|-------------|-------------|
| O | 4.28690500 | -2.46840000 | 1.17710600  |
| H | 0.76056300 | 1.41064500  | -1.51579800 |
| O | 4.44630900 | 0.01251900  | 1.56446600  |
| H | 3.64828600 | 0.92399500  | 1.78496500  |
| C | 1.09165300 | -3.50537800 | 0.52549900  |
| H | 1.70437300 | -3.14142500 | 1.35452800  |
| H | 0.16698700 | -3.94809800 | 0.89720700  |
| H | 1.66089600 | -4.24511500 | -0.04466600 |
| C | 2.13013200 | -3.06610600 | -3.19620200 |
| H | 1.77743600 | -2.27831600 | -3.86617100 |
| H | 2.95558600 | -3.61234000 | -3.65410000 |
| H | 1.31003200 | -3.75436100 | -2.96859300 |

TS-2-1

l imaginary frequency

H = -3546.167524

G = -3546.301052

E(M06-2X-DCM) = -3546.644529

|   |             |             |             |
|---|-------------|-------------|-------------|
| O | 3.81947900  | -1.72206300 | 2.31182900  |
| P | 3.62758900  | -0.79839700 | 1.00990700  |
| N | 3.87840000  | -1.77444900 | -0.26422800 |
| S | 2.76669700  | -2.41004800 | -1.16789800 |
| C | 2.50627900  | -1.15438300 | -2.52977400 |
| F | 1.59636600  | -1.60869300 | -3.40956200 |
| F | 2.03790900  | 0.00376100  | -2.01813800 |
| F | 3.64270900  | -0.89781800 | -3.17896500 |
| C | -1.58174000 | -4.03766100 | 0.88608000  |
| C | -1.65790600 | -3.48547700 | -0.60106700 |
| H | -0.63657400 | -3.47520900 | -0.98289400 |
| H | -2.19026400 | -4.25208900 | -1.18121200 |
| C | -3.70763300 | -1.89831000 | -0.84734700 |
| C | -4.63290300 | -2.96380000 | -0.83612200 |
| C | -4.22360100 | -0.58307200 | -0.81751600 |
| C | -6.00387300 | -2.72402100 | -0.78654300 |
| H | -4.28356600 | -3.98625300 | -0.90620400 |
| C | -5.58904400 | -0.34442700 | -0.74384900 |
| H | -3.54789000 | 0.26258400  | -0.83177000 |
| C | -6.48723300 | -1.41625300 | -0.72822600 |
| H | -6.69491800 | -3.56174500 | -0.79553100 |
| H | -5.95023400 | 0.67860700  | -0.69801100 |
| H | -7.55635400 | -1.23125900 | -0.67714200 |
| C | -2.26339200 | -2.14335800 | -0.96793500 |
| C | -1.34832800 | -2.93385900 | 1.96010800  |
| H | -0.86246500 | -3.38760100 | 2.83295200  |

|   |             |             |             |
|---|-------------|-------------|-------------|
| H | -2.29704300 | -2.51585800 | 2.30404400  |
| N | -0.56369600 | -1.81473500 | 1.46431700  |
| C | -0.92453400 | -0.52911700 | 1.60482000  |
| N | -0.27978000 | 0.23661300  | 0.54437900  |
| C | -0.44535200 | 1.66158600  | 0.40423900  |
| C | 0.70011700  | 2.45134900  | 0.28576300  |
| C | -1.71084300 | 2.23446800  | 0.27617300  |
| C | 0.56809700  | 3.81716300  | 0.03652400  |
| C | -1.82623700 | 3.60158700  | 0.02750000  |
| H | -2.59907800 | 1.63044400  | 0.38712800  |
| C | -0.69132900 | 4.40274500  | -0.09491000 |
| H | -0.78684400 | 5.46400600  | -0.29304200 |
| C | -3.20111000 | 4.21016200  | -0.06935100 |
| C | 1.80377100  | 4.65771500  | -0.16326900 |
| F | -4.09491300 | 3.32873300  | -0.58557700 |
| F | -3.20982600 | 5.30433700  | -0.85812300 |
| F | -3.67306800 | 4.58366400  | 1.13785300  |
| F | 2.87518100  | 4.13815900  | 0.47548400  |
| F | 1.62702900  | 5.91664800  | 0.29039300  |
| F | 2.12915500  | 4.75102100  | -1.47222200 |
| S | -2.03425500 | 0.08466600  | 2.67520400  |
| C | -2.84944700 | -4.80043200 | 1.31756400  |
| H | -3.04802400 | -5.64482500 | 0.64656400  |
| H | -2.71330200 | -5.21186000 | 2.32486900  |
| H | -3.73517300 | -4.15929200 | 1.34315000  |
| C | -0.39845300 | -5.03345200 | 0.88743600  |
| H | -0.31768400 | -5.52695100 | 1.86278000  |
| H | -0.54667000 | -5.81329000 | 0.13116800  |
| H | 0.55129100  | -4.53707400 | 0.66732400  |
| H | 1.67557900  | 1.99288200  | 0.40322800  |
| C | -1.41978800 | -1.16385400 | -1.52206800 |
| H | -0.85193800 | -0.43706900 | -0.52846700 |
| H | -0.46931000 | -1.52135600 | -1.91713500 |
| H | -1.88527700 | -0.37534100 | -2.11242700 |
| O | 1.39902000  | -2.46809500 | -0.55582400 |
| H | 0.23169700  | -2.03185000 | 0.85196900  |
| O | 3.21915000  | -3.61304300 | -1.86208500 |
| O | 4.94330800  | 0.13085800  | 1.10199900  |
| C | 3.72111300  | -1.12277300 | 3.61496900  |
| H | 2.78835000  | -0.55892600 | 3.71301800  |
| H | 3.73491200  | -1.94566500 | 4.33194000  |
| H | 4.57500300  | -0.46244700 | 3.79423000  |
| C | 5.19265200  | 1.09229400  | 0.06549200  |
| H | 6.20296800  | 1.47012300  | 0.23247500  |



|   |            |            |             |
|---|------------|------------|-------------|
| H | 5.13845100 | 0.61793600 | -0.91997200 |
| H | 4.47812400 | 1.92010200 | 0.12515300  |
| O | 2.35880300 | 0.02200700 | 1.06608200  |
| H | 0.75021500 | 0.00481400 | 0.53659800  |

TS-2-1-1

l imaginary frequency

H = -3546.162530

G = -3546.296049

E(M06-2X-DCM) = -3546.631341

|   |             |             |             |
|---|-------------|-------------|-------------|
| O | 2.84351800  | 1.30325000  | -1.12967300 |
| O | 3.06158600  | 1.75377800  | 1.29955400  |
| P | 2.52740700  | 2.43626000  | -0.05319400 |
| O | 2.95112500  | 3.83158600  | -0.27688800 |
| N | 0.81575200  | 2.23105900  | -0.06271000 |
| S | -0.26859500 | 3.33453900  | 0.50259800  |
| C | -0.63298900 | 4.42085800  | -0.98080800 |
| F | -1.55952400 | 5.31075100  | -0.61904900 |
| F | 0.45810700  | 5.04365400  | -1.39550600 |
| F | -1.11934300 | 3.65188900  | -1.96005500 |
| C | -4.72214200 | 0.75889400  | -0.40753500 |
| C | -4.22841800 | 0.46738900  | 1.07528100  |
| H | -3.70762200 | 1.35751800  | 1.43411700  |
| H | -5.12575800 | 0.37134800  | 1.70304500  |
| C | -3.81138900 | -2.08390500 | 1.20684000  |
| C | -5.18398100 | -2.39710500 | 1.32438100  |
| C | -2.90204500 | -3.14823500 | 1.00485900  |
| C | -5.62581500 | -3.71411600 | 1.24781700  |
| H | -5.90388200 | -1.61257700 | 1.52492100  |
| C | -3.35124600 | -4.45804400 | 0.89900100  |
| H | -1.84668200 | -2.93899700 | 0.87593400  |
| C | -4.71315000 | -4.74734900 | 1.02486000  |
| H | -6.68309900 | -3.93413700 | 1.36328500  |
| H | -2.63849000 | -5.25478000 | 0.70989600  |
| H | -5.06075000 | -5.77388700 | 0.95060900  |
| C | -3.32806900 | -0.71214100 | 1.36221400  |
| C | -3.75758200 | 0.15138900  | -1.46041000 |
| H | -3.88822200 | 0.68169500  | -2.41457300 |
| H | -3.98552700 | -0.89990200 | -1.65395600 |
| N | -2.38626700 | 0.20727700  | -1.00704400 |
| C | -1.40953000 | -0.73409100 | -1.22626000 |
| N | -0.38126400 | -0.50178900 | -0.34523300 |
| C | 0.79209100  | -1.26568700 | -0.24404300 |
| C | 1.40414800  | -1.98047000 | -1.29203800 |

|   |             |             |             |
|---|-------------|-------------|-------------|
| C | 1.46219800  | -1.21146400 | 0.99451700  |
| C | 2.62480800  | -2.62352700 | -1.08219000 |
| C | 2.67890500  | -1.85812300 | 1.18642400  |
| H | 1.03053400  | -0.63673200 | 1.80589800  |
| C | 3.27190200  | -2.58371700 | 0.15218000  |
| H | 4.21384000  | -3.09765800 | 0.30286000  |
| C | 3.41821600  | -1.69725100 | 2.48557600  |
| C | 3.30569000  | -3.28944600 | -2.24822800 |
| F | 4.36962000  | -0.72989200 | 2.39973000  |
| F | 4.05797400  | -2.83154600 | 2.84608800  |
| F | 2.60221500  | -1.34909800 | 3.50519900  |
| F | 2.43033800  | -3.81828100 | -3.12351600 |
| F | 4.13920500  | -4.27720400 | -1.85325700 |
| F | 4.06504400  | -2.39812700 | -2.94469800 |
| S | -1.64307100 | -2.00215800 | -2.32156000 |
| C | -6.13170400 | 0.20485700  | -0.68969400 |
| H | -6.87050300 | 0.63419600  | -0.00204500 |
| H | -6.44108900 | 0.46863800  | -1.70788900 |
| H | -6.17254700 | -0.88473500 | -0.60920000 |
| C | -4.77957800 | 2.29708100  | -0.55273300 |
| H | -5.19057900 | 2.57204100  | -1.53080900 |
| H | -5.42750000 | 2.73607400  | 0.21557400  |
| H | -3.79212900 | 2.75903700  | -0.45501400 |
| H | 0.92639900  | -2.02673100 | -2.25976600 |
| C | -2.02172400 | -0.49408700 | 1.90343700  |
| H | -1.21167000 | -0.50838300 | 0.96688600  |
| H | -1.85991800 | 0.50754600  | 2.30486300  |
| H | -1.65401100 | -1.28351900 | 2.56122800  |
| O | 0.30537100  | 4.18425100  | 1.53528400  |
| H | -2.09169900 | 1.03911100  | -0.50091700 |
| O | -1.52440400 | 2.60080400  | 0.73212400  |
| H | 0.39783500  | 1.28758100  | -0.22510700 |
| C | 4.19562300  | 0.80668600  | -1.28449200 |
| H | 4.13491600  | -0.00037000 | -2.01322300 |
| H | 4.84509000  | 1.60497000  | -1.65416700 |
| H | 4.56229600  | 0.42179800  | -0.33026600 |
| C | 3.34919700  | 2.55472900  | 2.46729400  |
| H | 2.42159500  | 2.94736100  | 2.89309400  |
| H | 3.83387100  | 1.87591200  | 3.16928900  |
| H | 4.01249600  | 3.38232100  | 2.20650800  |

TS-2-1-2

l imaginary frequency

H = -3546.155757

G = -3546.289653

E(M06-2X-DCM) = -3546.628855

|   |             |             |             |
|---|-------------|-------------|-------------|
| O | 1.09190900  | -2.50339400 | 1.62191700  |
| P | 2.16772800  | -1.31363300 | 1.44779800  |
| O | 1.76978100  | -0.02543000 | 2.13483900  |
| N | 2.25427200  | -1.29077400 | -0.18065800 |
| S | 3.39541500  | -0.61586500 | -1.02776100 |
| C | 4.36765500  | -2.05464700 | -1.71199800 |
| F | 4.87932400  | -2.77241300 | -0.70429000 |
| F | 3.58565700  | -2.84259200 | -2.45427500 |
| F | 5.37160500  | -1.60043500 | -2.47234500 |
| C | 2.04271300  | 3.61347200  | 0.63027600  |
| C | 0.88883100  | 3.83728200  | 1.70481800  |
| H | 1.11958000  | 3.22091700  | 2.57644200  |
| H | 0.95569600  | 4.88047100  | 2.04624200  |
| C | -1.22220300 | 4.36475600  | 0.31734800  |
| C | -0.83642900 | 5.69652800  | 0.04843600  |
| C | -2.32300600 | 3.83395200  | -0.39360700 |
| C | -1.52552200 | 6.46295600  | -0.88602500 |
| H | -0.02545500 | 6.14924700  | 0.60599500  |
| C | -2.98621100 | 4.59129900  | -1.35115200 |
| H | -2.62662800 | 2.80772000  | -0.22238700 |
| C | -2.59388500 | 5.91051400  | -1.59614700 |
| H | -1.22795500 | 7.49250200  | -1.06101000 |
| H | -3.81067400 | 4.15437600  | -1.90622700 |
| H | -3.12157200 | 6.50627900  | -2.33532100 |
| C | -0.54660200 | 3.56641600  | 1.34146600  |
| C | 1.59412200  | 2.61888700  | -0.47079000 |
| H | 2.47949200  | 2.19160300  | -0.95386400 |
| H | 1.00940600  | 3.12866300  | -1.24257100 |
| N | 0.75433000  | 1.58656800  | 0.11368900  |
| C | -0.24438700 | 0.88903200  | -0.48262700 |
| N | -1.15777100 | 0.44001000  | 0.33647200  |
| C | -2.09992800 | -0.56700000 | 0.07928900  |
| C | -1.67133800 | -1.88839800 | -0.12729100 |
| C | -3.47070400 | -0.29147500 | 0.14886900  |
| C | -2.61415600 | -2.90539700 | -0.26173800 |
| C | -4.40147100 | -1.32031900 | -0.00008300 |
| H | -3.81218200 | 0.72511900  | 0.31274400  |
| C | -3.98257300 | -2.63434000 | -0.20360800 |
| H | -4.70644400 | -3.43154100 | -0.31836300 |
| C | -5.86872300 | -1.00876800 | 0.12757400  |
| C | -2.13043900 | -4.32858900 | -0.38238500 |
| F | -6.63441100 | -1.88908500 | -0.54909100 |

|   |             |             |             |
|---|-------------|-------------|-------------|
| F | -6.15984900 | 0.22883600  | -0.33930500 |
| F | -6.27459100 | -1.04056900 | 1.41874200  |
| F | -3.08856200 | -5.14757200 | -0.86997200 |
| F | -1.77047900 | -4.82227100 | 0.82958800  |
| F | -1.05597700 | -4.42991400 | -1.18477100 |
| S | -0.32348100 | 0.71457600  | -2.25305000 |
| C | 2.48746800  | 4.91628100  | -0.05917200 |
| H | 2.83858500  | 5.65098600  | 0.67537300  |
| H | 3.32272400  | 4.70881500  | -0.73746800 |
| H | 1.69009600  | 5.37198100  | -0.65379200 |
| C | 3.24836500  | 3.04376000  | 1.41172900  |
| H | 4.09800600  | 2.88536400  | 0.74061900  |
| H | 3.55599900  | 3.74353900  | 2.19893300  |
| H | 3.01377200  | 2.08125000  | 1.87613500  |
| H | -0.60956500 | -2.10921800 | -0.15188400 |
| C | -1.30376000 | 2.58927900  | 2.06453700  |
| H | -1.33393500 | 1.57140300  | 1.37097200  |
| H | -0.82914700 | 2.22987600  | 2.97929700  |
| H | -2.36056700 | 2.82882700  | 2.19687700  |
| O | 4.38789400  | 0.17895200  | -0.27153300 |
| H | 1.09234800  | 1.12297100  | 0.98336500  |
| O | 2.83445800  | 0.02780400  | -2.24487100 |
| H | 1.02182200  | 0.48539100  | -2.38736000 |
| O | 3.47490600  | -1.96526100 | 2.14347400  |
| C | 0.64518800  | -2.87413400 | 2.93264700  |
| H | 0.28890700  | -1.99883000 | 3.48585100  |
| H | -0.17478500 | -3.57818100 | 2.78014600  |
| H | 1.45502800  | -3.35852700 | 3.48729600  |
| C | 4.49333900  | -1.14180800 | 2.74024000  |
| H | 5.14410800  | -1.82211100 | 3.29388400  |
| H | 5.06099900  | -0.62451900 | 1.96366000  |
| H | 4.04553600  | -0.41431500 | 3.42313000  |

TS-2-1-3

l imaginary frequency

H = -3546.162530

G = -3546.296049

E(M06-2X-DCM) = -3546.631341

|   |             |            |             |
|---|-------------|------------|-------------|
| O | 2.84351400  | 1.30325800 | -1.12966900 |
| O | 3.06158000  | 1.75378100 | 1.29955900  |
| P | 2.52740000  | 2.43626500 | -0.05318900 |
| O | 2.95111500  | 3.83159200 | -0.27688000 |
| N | 0.81574500  | 2.23106000 | -0.06270500 |
| S | -0.26860400 | 3.33453900 | 0.50259900  |

|   |             |             |             |
|---|-------------|-------------|-------------|
| C | -0.63299900 | 4.42085400  | -0.98080900 |
| F | -1.55953200 | 5.31075000  | -0.61905200 |
| F | 0.45809700  | 5.04364700  | -1.39551200 |
| F | -1.11935700 | 3.65188300  | -1.96005300 |
| C | -4.72214100 | 0.75888500  | -0.40754000 |
| C | -4.22841700 | 0.46738400  | 1.07527600  |
| H | -3.70762000 | 1.35751300  | 1.43411000  |
| H | -5.12575700 | 0.37134400  | 1.70304000  |
| C | -3.81138700 | -2.08390900 | 1.20684100  |
| C | -5.18397900 | -2.39711000 | 1.32438300  |
| C | -2.90204200 | -3.14824000 | 1.00486100  |
| C | -5.62581200 | -3.71412100 | 1.24782300  |
| H | -5.90388000 | -1.61258100 | 1.52492300  |
| C | -3.35124300 | -4.45804900 | 0.89900600  |
| H | -1.84668000 | -2.93900100 | 0.87593500  |
| C | -4.71314700 | -4.74735400 | 1.02486700  |
| H | -6.68309600 | -3.93414300 | 1.36329200  |
| H | -2.63848700 | -5.25478500 | 0.70990300  |
| H | -5.06074600 | -5.77389300 | 0.95061800  |
| C | -3.32806700 | -0.71214600 | 1.36221200  |
| C | -3.75757800 | 0.15138000  | -1.46041500 |
| H | -3.88822000 | 0.68168500  | -2.41457800 |
| H | -3.98552100 | -0.89991100 | -1.65396000 |
| N | -2.38626300 | 0.20727200  | -1.00704800 |
| C | -1.40952500 | -0.73409400 | -1.22626100 |
| N | -0.38125800 | -0.50178600 | -0.34523600 |
| C | 0.79209700  | -1.26568400 | -0.24404500 |
| C | 1.40415600  | -1.98046500 | -1.29204100 |
| C | 1.46220300  | -1.21146100 | 0.99451600  |
| C | 2.62481600  | -2.62352100 | -1.08219300 |
| C | 2.67891100  | -1.85811800 | 1.18642200  |
| H | 1.03053800  | -0.63673000 | 1.80589600  |
| C | 3.27190900  | -2.58371100 | 0.15217800  |
| H | 4.21384800  | -3.09765200 | 0.30285800  |
| C | 3.41822100  | -1.69724700 | 2.48557500  |
| C | 3.30569900  | -3.28943800 | -2.24823100 |
| F | 4.36962300  | -0.72988600 | 2.39973100  |
| F | 4.05798100  | -2.83154200 | 2.84608500  |
| F | 2.60221800  | -1.34909700 | 3.50519800  |
| F | 2.43034900  | -3.81826800 | -3.12352300 |
| F | 4.13921100  | -4.27719800 | -1.85326100 |
| F | 4.06505800  | -2.39811800 | -2.94469600 |
| S | -1.64306400 | -2.00216600 | -2.32155500 |
| C | -6.13170100 | 0.20484300  | -0.68970000 |

|   |             |             |             |
|---|-------------|-------------|-------------|
| H | -6.87050100 | 0.63418300  | -0.00205200 |
| H | -6.44108600 | 0.46862200  | -1.70789600 |
| H | -6.17254200 | -0.88474900 | -0.60920300 |
| C | -4.77958000 | 2.29707100  | -0.55274100 |
| H | -5.19058200 | 2.57202900  | -1.53081800 |
| H | -5.42750200 | 2.73606400  | 0.21556600  |
| H | -3.79213200 | 2.75902900  | -0.45502300 |
| H | 0.92640700  | -2.02672500 | -2.25976900 |
| C | -2.02172200 | -0.49408900 | 1.90343500  |
| H | -1.21166800 | -0.50838200 | 0.96688500  |
| H | -1.85991900 | 0.50754300  | 2.30486300  |
| H | -1.65400900 | -1.28352100 | 2.56122600  |
| O | 0.30535800  | 4.18425400  | 1.53528400  |
| H | -2.09169800 | 1.03910800  | -0.50092300 |
| O | -1.52441200 | 2.60080200  | 0.73212500  |
| H | 0.39783000  | 1.28758100  | -0.22510300 |
| C | 4.19562000  | 0.80669800  | -1.28448900 |
| H | 4.13491600  | -0.00035700 | -2.01322200 |
| H | 4.84508400  | 1.60498500  | -1.65416300 |
| H | 4.56229400  | 0.42180900  | -0.33026400 |
| C | 3.34918700  | 2.55473100  | 2.46730000  |
| H | 2.42158300  | 2.94735800  | 2.89310100  |
| H | 3.83386300  | 1.87591400  | 3.16929400  |
| H | 4.01248200  | 3.38232600  | 2.20651700  |

TS-2-1-4

l imaginary frequency

H = -3546.160293

G = -3546.294389

E(M06-2X-DCM) = -3546.631513

|   |             |            |             |
|---|-------------|------------|-------------|
| O | 0.12790500  | 4.24676900 | 1.68047600  |
| O | -0.83693100 | 4.35347300 | -0.70022400 |
| P | -0.00227300 | 3.43503800 | 0.30999400  |
| O | 1.34275600  | 2.97839900 | -0.13240800 |
| N | -1.03938700 | 2.11308700 | 0.49090400  |
| S | -2.71182100 | 2.03928600 | 0.45481100  |
| C | -3.11947600 | 1.94720000 | -1.38829400 |
| F | -4.28959900 | 1.33117400 | -1.51584900 |
| F | -3.19826200 | 3.17030100 | -1.90547200 |
| F | -2.17270700 | 1.25718800 | -2.03091900 |
| C | 4.68524500  | 1.32044300 | 0.56561400  |
| C | 4.15472400  | 1.13046200 | -0.91799700 |
| H | 3.52896500  | 1.99292900 | -1.15585900 |
| H | 5.02624000  | 1.19181500 | -1.58585300 |

|   |             |             |             |
|---|-------------|-------------|-------------|
| C | 3.97789800  | -1.42556300 | -1.30257000 |
| C | 5.36702500  | -1.58958000 | -1.49977800 |
| C | 3.18146700  | -2.58830200 | -1.18447500 |
| C | 5.93279200  | -2.85807400 | -1.57909000 |
| H | 6.00076500  | -0.72176700 | -1.63893000 |
| C | 3.75543600  | -3.85220600 | -1.23427400 |
| H | 2.11755100  | -2.49814800 | -0.99951300 |
| C | 5.13131600  | -3.99289500 | -1.43632100 |
| H | 6.99997200  | -2.96099000 | -1.75311300 |
| H | 3.12881200  | -4.72956800 | -1.10720300 |
| H | 5.57626600  | -4.98284600 | -1.48349400 |
| C | 3.36138500  | -0.09863800 | -1.29563900 |
| C | 3.79937000  | 0.55539700  | 1.58752400  |
| H | 3.88325800  | 1.04241300  | 2.56967000  |
| H | 4.14020600  | -0.47447400 | 1.72010000  |
| N | 2.42362500  | 0.48492700  | 1.14929500  |
| C | 1.57210500  | -0.57990600 | 1.32080200  |
| N | 0.48290800  | -0.41356100 | 0.49946300  |
| C | -0.55813700 | -1.35763700 | 0.38454300  |
| C | -1.11843000 | -2.06301700 | 1.46706900  |
| C | -1.15397200 | -1.50306200 | -0.87761300 |
| C | -2.22361900 | -2.88721000 | 1.26804000  |
| C | -2.26691700 | -2.32396700 | -1.05962700 |
| H | -0.75367600 | -0.95512100 | -1.72287400 |
| C | -2.81136300 | -3.02976500 | 0.00915700  |
| H | -3.67832500 | -3.66370000 | -0.12902000 |
| C | -2.91553200 | -2.36393400 | -2.41480400 |
| C | -2.77081900 | -3.67983700 | 2.42652200  |
| F | -3.72865900 | -3.43006900 | -2.56602900 |
| F | -1.99635200 | -2.41097100 | -3.41029300 |
| F | -3.66609300 | -1.25697500 | -2.64194000 |
| F | -4.10238000 | -3.88946300 | 2.30583600  |
| F | -2.56332100 | -3.06369700 | 3.60890100  |
| F | -2.19209100 | -4.90142800 | 2.51076700  |
| S | 1.98607100  | -1.90123400 | 2.29432000  |
| C | 6.13718700  | 0.84156400  | 0.75575100  |
| H | 6.82253900  | 1.37958200  | 0.08916000  |
| H | 6.46274600  | 1.03629900  | 1.78456700  |
| H | 6.24764400  | -0.23134200 | 0.57733300  |
| C | 4.64542300  | 2.84049500  | 0.84369200  |
| H | 5.05905200  | 3.05777000  | 1.83533200  |
| H | 5.24900900  | 3.38459800  | 0.10637500  |
| H | 3.62557100  | 3.23433300  | 0.79823200  |
| H | -0.69866500 | -1.95159500 | 2.45603100  |

|   |             |             |             |
|---|-------------|-------------|-------------|
| C | 2.02114600  | 0.04040500  | -1.78044900 |
| H | 1.25282700  | -0.18682000 | -0.84018300 |
| H | 1.73985600  | 1.06073800  | -2.04599800 |
| H | 1.72276700  | -0.69624800 | -2.52866500 |
| O | -3.26195500 | 3.30312500  | 0.93014000  |
| H | 2.02041600  | 1.32597000  | 0.73293900  |
| O | -3.09476400 | 0.75211900  | 1.01287100  |
| H | -0.54426500 | 1.18632000  | 0.51463600  |
| C | -0.98353600 | 4.66540600  | 2.50468200  |
| H | -1.46090100 | 3.79513700  | 2.95922600  |
| H | -0.54980000 | 5.30291000  | 3.27587400  |
| H | -1.72018400 | 5.21802000  | 1.91846100  |
| C | -0.31147500 | 5.62923700  | -1.12405700 |
| H | 0.62978900  | 5.48799700  | -1.66195300 |
| H | -1.06323800 | 6.05632300  | -1.78774300 |
| H | -0.15548000 | 6.28616400  | -0.26346900 |

TS-2-1-5

l imaginary frequency

H = -3546.157571

G = -3546.290486

E(M06-2X-DCM) = -3546.630809

|   |             |             |             |
|---|-------------|-------------|-------------|
| O | 4.15175600  | -1.71765400 | -1.82710200 |
| P | 2.69580500  | -1.87694400 | -1.20398000 |
| N | 2.53140000  | -0.80913800 | -0.04208500 |
| S | 2.55986700  | -0.96254100 | 1.54598500  |
| C | 4.38038200  | -0.91910000 | 1.96694900  |
| F | 4.54007500  | -1.04352600 | 3.28547200  |
| F | 5.01030300  | -1.92762500 | 1.35052600  |
| F | 4.92171400  | 0.23728000  | 1.56807300  |
| C | 2.07140400  | 3.82013500  | 0.20767900  |
| C | 0.91109600  | 4.13572600  | 1.24215400  |
| H | 1.16937600  | 3.66949000  | 2.19675000  |
| H | 0.90632400  | 5.21793000  | 1.43457600  |
| C | -1.22687100 | 4.33352700  | -0.20528700 |
| C | -0.91257800 | 5.63471900  | -0.65077100 |
| C | -2.30851700 | 3.66482500  | -0.81945800 |
| C | -1.64876900 | 6.24061600  | -1.66492500 |
| H | -0.11885000 | 6.19582900  | -0.17222800 |
| C | -3.02124400 | 4.26134700  | -1.85365100 |
| H | -2.56490300 | 2.65753200  | -0.51374500 |
| C | -2.69795400 | 5.55246900  | -2.27742500 |
| H | -1.40265700 | 7.25167400  | -1.97643300 |
| H | -3.82892000 | 3.71486700  | -2.33089400 |



|   |             |             |             |
|---|-------------|-------------|-------------|
| H | -3.26297700 | 6.02100900  | -3.07826200 |
| C | -0.50418500 | 3.71214300  | 0.91594100  |
| C | 1.63220700  | 2.67923200  | -0.75127500 |
| H | 2.51464900  | 2.13636700  | -1.11401400 |
| H | 1.10444500  | 3.06686600  | -1.62591800 |
| N | 0.72545200  | 1.79748400  | -0.05025200 |
| C | -0.23992500 | 0.98057100  | -0.60652800 |
| N | -1.05009500 | 0.54560300  | 0.35848500  |
| C | -2.04378300 | -0.42354000 | 0.23127600  |
| C | -1.82863300 | -1.63403400 | -0.45068700 |
| C | -3.26529000 | -0.24632300 | 0.90059300  |
| C | -2.80673500 | -2.62486500 | -0.45397000 |
| C | -4.24262200 | -1.24104600 | 0.87557000  |
| H | -3.45251300 | 0.67602300  | 1.43930000  |
| C | -4.02589200 | -2.44169700 | 0.20100600  |
| H | -4.78728200 | -3.21123800 | 0.18101800  |
| C | -5.52091400 | -1.03380500 | 1.64316800  |
| C | -2.49813400 | -3.94098300 | -1.11491200 |
| F | -6.54264000 | -1.75090100 | 1.12739400  |
| F | -5.89945200 | 0.26612700  | 1.64751600  |
| F | -5.39323200 | -1.40481800 | 2.93841400  |
| F | -3.61146500 | -4.63021400 | -1.43603500 |
| F | -1.75870400 | -4.74243700 | -0.30185900 |
| F | -1.77393100 | -3.78422100 | -2.24823700 |
| S | -0.34372400 | 0.73822800  | -2.31085500 |
| C | 2.47772400  | 5.04104000  | -0.63859100 |
| H | 2.82130200  | 5.86628200  | -0.00302000 |
| H | 3.30754500  | 4.77462000  | -1.30383600 |
| H | 1.65989000  | 5.40335800  | -1.26735400 |
| C | 3.30060000  | 3.38482500  | 1.03707400  |
| H | 4.16289100  | 3.21362800  | 0.38271400  |
| H | 3.57769700  | 4.16667100  | 1.75501300  |
| H | 3.11608000  | 2.46181200  | 1.59506300  |
| H | -0.89540300 | -1.79095000 | -0.97361700 |
| C | -1.24150000 | 2.86454400  | 1.80283400  |
| H | -1.25840800 | 1.73503500  | 1.24902700  |
| H | -0.75860500 | 2.66003400  | 2.76024800  |
| H | -2.30041900 | 3.10862900  | 1.90285400  |
| O | 2.07603300  | -2.25264200 | 2.04787500  |
| H | 1.06487500  | 1.43376400  | 0.84411700  |
| O | 2.02511100  | 0.27799800  | 2.14012400  |
| O | 2.63245600  | -3.42788700 | -0.85989000 |
| C | 4.54448800  | -2.47431000 | -2.99397300 |
| H | 3.85210800  | -2.28511900 | -3.81869400 |

|   |            |             |             |
|---|------------|-------------|-------------|
| H | 5.54255400 | -2.12108900 | -3.25419900 |
| H | 4.57203500 | -3.54072500 | -2.75724500 |
| C | 1.38487600 | -4.10812600 | -0.55155700 |
| H | 1.65420500 | -5.15481500 | -0.41042900 |
| H | 0.96335200 | -3.70576400 | 0.37042400  |
| H | 0.69077700 | -4.00705700 | -1.38703600 |
| O | 1.62596700 | -1.64284800 | -2.34094100 |
| H | 1.06819100 | -0.78920000 | -2.29891200 |

TS-2-1-6

l imaginary frequency

H = -3546.158148

G = -3546.292272

E(M06-2X-DCM) = -3546.630499

|   |             |             |             |
|---|-------------|-------------|-------------|
| O | -3.22095200 | 0.41112500  | 2.61532100  |
| P | -3.28462400 | -0.78964300 | 1.57731700  |
| N | -4.24640400 | -0.41817600 | 0.35935400  |
| S | -3.86117000 | 0.48079100  | -0.89680100 |
| C | -3.42948800 | -0.77852900 | -2.21095200 |
| F | -2.89624300 | -0.14714900 | -3.26485100 |
| F | -2.52636800 | -1.65299800 | -1.73627300 |
| F | -4.51256700 | -1.44742400 | -2.60078400 |
| C | -0.64640600 | 4.34113100  | 0.17027900  |
| C | -0.32984300 | 3.69828900  | -1.25091300 |
| H | -1.24611800 | 3.22135200  | -1.60334500 |
| H | -0.13973600 | 4.53362800  | -1.93975400 |
| C | 2.18500200  | 3.06353100  | -1.27231000 |
| C | 2.62419600  | 4.39341900  | -1.45571900 |
| C | 3.16070600  | 2.08128000  | -0.98430400 |
| C | 3.97306000  | 4.72060600  | -1.35229200 |
| H | 1.91453500  | 5.16657300  | -1.72550100 |
| C | 4.50240400  | 2.41358200  | -0.85478200 |
| H | 2.85915300  | 1.05383200  | -0.82254100 |
| C | 4.91450300  | 3.73672000  | -1.04058900 |
| H | 4.29035200  | 5.74626000  | -1.51662200 |
| H | 5.21867000  | 1.63713900  | -0.60330000 |
| H | 5.96438200  | 3.99895400  | -0.94547900 |
| C | 0.77996100  | 2.68739600  | -1.43058300 |
| C | -0.22201400 | 3.42845800  | 1.35547700  |
| H | -0.82692100 | 3.68921700  | 2.23492700  |
| H | 0.82121300  | 3.59921100  | 1.63383500  |
| N | -0.34169500 | 2.02300700  | 1.02715800  |
| C | 0.53435400  | 1.04223500  | 1.39525800  |
| N | 0.36460700  | -0.04972200 | 0.55064000  |

|   |              |              |              |
|---|--------------|--------------|--------------|
| C | 1. 27556600  | -1. 12661400 | 0. 41996500  |
| C | 2. 64311900  | -1. 08467500 | 0. 73882900  |
| C | 0. 78099600  | -2. 28118600 | -0. 21724100 |
| C | 3. 47625000  | -2. 15841900 | 0. 41960900  |
| C | 1. 62006100  | -3. 35310600 | -0. 50850600 |
| H | -0. 26381000 | -2. 32476500 | -0. 50147200 |
| C | 2. 98108600  | -3. 30355900 | -0. 19803900 |
| H | 3. 63593100  | -4. 13020100 | -0. 44320700 |
| C | 1. 04075400  | -4. 59857300 | -1. 12624700 |
| C | 4. 94731100  | -2. 00895000 | 0. 70398100  |
| F | -0. 00478700 | -4. 31996400 | -1. 93617000 |
| F | 0. 58791000  | -5. 45783400 | -0. 18365000 |
| F | 1. 95646800  | -5. 26819100 | -1. 86039400 |
| F | 5. 18109300  | -1. 64099800 | 1. 97977800  |
| F | 5. 49884400  | -1. 04243500 | -0. 08256000 |
| F | 5. 63652200  | -3. 14429000 | 0. 47143700  |
| S | 1. 59362300  | 1. 24002800  | 2. 69470000  |
| C | 0. 04653800  | 5. 70217900  | 0. 37440000  |
| H | -0. 25419100 | 6. 41808600  | -0. 40013300 |
| H | -0. 24255300 | 6. 12833700  | 1. 34245400  |
| H | 1. 13691500  | 5. 61877700  | 0. 36774100  |
| C | -2. 17433000 | 4. 57459200  | 0. 19577600  |
| H | -2. 46595500 | 5. 09072400  | 1. 11769400  |
| H | -2. 48553600 | 5. 20103300  | -0. 64879200 |
| H | -2. 73151500 | 3. 63510000  | 0. 13380200  |
| H | 3. 04886500  | -0. 22014900 | 1. 24620000  |
| C | 0. 45356400  | 1. 35948500  | -1. 82635700 |
| H | 0. 37665400  | 0. 66340000  | -0. 78076100 |
| H | -0. 55342400 | 1. 22180600  | -2. 22129000 |
| H | 1. 21980900  | 0. 82786200  | -2. 39251400 |
| O | -2. 58084700 | 1. 21828300  | -0. 71879400 |
| H | -1. 12076400 | 1. 74373100  | 0. 43169200  |
| O | -5. 00926100 | 1. 21128400  | -1. 41981100 |
| O | -3. 96250500 | -1. 97242700 | 2. 39499700  |
| C | -2. 44879500 | 0. 31477600  | 3. 84077200  |
| H | -1. 38527700 | 0. 20417100  | 3. 61638100  |
| H | -2. 62177500 | 1. 25270600  | 4. 36807400  |
| H | -2. 80665700 | -0. 52489500 | 4. 44114500  |
| C | -4. 27387800 | -3. 22723200 | 1. 74938000  |
| H | -4. 78733300 | -3. 82892900 | 2. 49950100  |
| H | -4. 92899400 | -3. 05187000 | 0. 89251700  |
| H | -3. 35334400 | -3. 72604000 | 1. 43435800  |
| O | -1. 83427800 | -1. 30072600 | 1. 25639300  |
| H | -1. 07115600 | -0. 68906000 | 0. 88518400  |

TS-2-1-7

l imaginary frequency

H = -3546.149247

G = -3546.286009

E(M06-2X-DCM) = -3546.623723

|   |             |             |             |
|---|-------------|-------------|-------------|
| O | -3.47688100 | -0.89975800 | 1.99205300  |
| P | -2.89450200 | -2.13451600 | 1.17168000  |
| N | -3.57733800 | -2.28995300 | -0.24667400 |
| S | -3.41330000 | -1.39750600 | -1.56573400 |
| C | -4.98502800 | -0.38797600 | -1.52334400 |
| F | -5.00156300 | 0.44501800  | -2.57319100 |
| F | -6.06227800 | -1.16982500 | -1.57197000 |
| F | -5.03201200 | 0.34732000  | -0.39785800 |
| C | -2.05058600 | 3.48446400  | -0.48792200 |
| C | -0.81104700 | 4.02983100  | -1.31886600 |
| H | -0.93316300 | 3.71256700  | -2.35787400 |
| H | -0.86852200 | 5.12689400  | -1.34016900 |
| C | 1.15885100  | 4.14400600  | 0.35442900  |
| C | 0.67298100  | 5.31968300  | 0.96634700  |
| C | 2.25551400  | 3.48778600  | 0.95761300  |
| C | 1.25846800  | 5.81711300  | 2.12653000  |
| H | -0.13675600 | 5.87531000  | 0.50938100  |
| C | 2.81894500  | 3.97182300  | 2.13246700  |
| H | 2.64126200  | 2.57110200  | 0.52809500  |
| C | 2.32635000  | 5.14000400  | 2.71918300  |
| H | 0.88148000  | 6.73545500  | 2.56723700  |
| H | 3.64183600  | 3.43326900  | 2.59221300  |
| H | 2.77489300  | 5.52251700  | 3.63162400  |
| C | 0.59200300  | 3.64552900  | -0.90568600 |
| C | -1.62057600 | 2.28666500  | 0.40194300  |
| H | -2.49456500 | 1.66384500  | 0.63039300  |
| H | -1.19144900 | 2.62176900  | 1.34906500  |
| N | -0.60272400 | 1.52915300  | -0.29243500 |
| C | 0.39192700  | 0.73994800  | 0.25316700  |
| N | 1.29475600  | 0.45964900  | -0.68265900 |
| C | 2.37082800  | -0.42223800 | -0.53142100 |
| C | 2.19485500  | -1.73418800 | -0.05514200 |
| C | 3.64298600  | -0.03373700 | -0.97279400 |
| C | 3.27627700  | -2.60906400 | -0.00292300 |
| C | 4.71830300  | -0.92185000 | -0.91407700 |
| H | 3.79240500  | 0.96131800  | -1.37743400 |
| C | 4.54842100  | -2.21464400 | -0.42564800 |
| H | 5.38001400  | -2.90775700 | -0.39535000 |

|   |             |             |             |
|---|-------------|-------------|-------------|
| C | 6.08300400  | -0.44684200 | -1.33442400 |
| C | 3.08399900  | -3.99319500 | 0.56102500  |
| F | 6.88354400  | -1.46624300 | -1.70994200 |
| F | 6.71668200  | 0.20281100  | -0.32813500 |
| F | 6.01553800  | 0.42125300  | -2.37105300 |
| F | 3.92718300  | -4.88592200 | -0.00588000 |
| F | 1.82650100  | -4.44781100 | 0.37409800  |
| F | 3.32077700  | -4.02442100 | 1.89321800  |
| S | 0.40906300  | 0.34355500  | 1.93376400  |
| C | -2.68780200 | 4.55786900  | 0.41393300  |
| H | -3.03117600 | 5.41644700  | -0.17549600 |
| H | -3.56358000 | 4.14374400  | 0.92697200  |
| H | -1.99871300 | 4.91776600  | 1.18332100  |
| C | -3.11169200 | 3.03692800  | -1.51765900 |
| H | -4.02251600 | 2.70120900  | -1.01324400 |
| H | -3.37887400 | 3.86885400  | -2.18054200 |
| H | -2.76337300 | 2.20660000  | -2.14039900 |
| H | 1.21121400  | -2.06864900 | 0.24818700  |
| C | 1.45629200  | 2.95262000  | -1.81193900 |
| H | 1.49098900  | 1.76345900  | -1.40363000 |
| H | 1.07956300  | 2.85857900  | -2.83216500 |
| H | 2.50427100  | 3.25458700  | -1.77719000 |
| O | -3.51370600 | -2.21983900 | -2.76714600 |
| H | -0.86286100 | 1.21662300  | -1.22395400 |
| O | -2.34057300 | -0.38454700 | -1.47815000 |
| O | -3.31409800 | -3.39734500 | 2.04871600  |
| C | -3.12970600 | -0.66121500 | 3.37938800  |
| H | -2.10924200 | -0.27502200 | 3.44298300  |
| H | -3.83706900 | 0.08923700  | 3.73365300  |
| H | -3.23851700 | -1.57979500 | 3.96036400  |
| C | -3.00503900 | -4.73401200 | 1.59026300  |
| H | -3.43545700 | -5.40945900 | 2.32998600  |
| H | -3.45783700 | -4.90329600 | 0.61056300  |
| H | -1.92139000 | -4.87256700 | 1.54087000  |
| O | -1.31359000 | -2.09247400 | 1.19674800  |
| H | -0.84013400 | -1.23535100 | 1.47322500  |

TS-E-1

l imaginary frequency

H = -3546.193030

G = -3546.327946

E(M06-2X-DCM) = -3546.664627

|   |            |            |             |
|---|------------|------------|-------------|
| O | 3.73926100 | 2.77126700 | -0.72825000 |
| O | 4.52349800 | 1.39153900 | 1.29520800  |

|   |             |             |             |
|---|-------------|-------------|-------------|
| P | 3.28388200  | 1.58500800  | 0.27957300  |
| O | 3.08694000  | 0.27716500  | -0.44329900 |
| C | 3.43103100  | -3.22227800 | -1.46941900 |
| C | 3.00446000  | -3.34064500 | 0.03196900  |
| H | 3.66057200  | -4.09560400 | 0.49501900  |
| H | 3.26144600  | -2.40249700 | 0.52615500  |
| C | 0.96735200  | -3.03281300 | 1.56273700  |
| C | 1.20633600  | -1.66206600 | 1.81339900  |
| C | 0.04804300  | -3.71203000 | 2.39646700  |
| C | 0.51631600  | -0.98974100 | 2.81880300  |
| H | 1.88061900  | -1.09395600 | 1.18142200  |
| C | -0.61339800 | -3.04489100 | 3.42097500  |
| H | -0.11609300 | -4.77682400 | 2.26461600  |
| C | -0.39245400 | -1.67930700 | 3.62504000  |
| H | 0.66853400  | 0.07740700  | 2.94436200  |
| H | -1.30752100 | -3.58709300 | 4.05621200  |
| H | -0.93001600 | -1.15302800 | 4.40850400  |
| C | 1.59838400  | -3.72597500 | 0.43103100  |
| C | 2.33073300  | -2.56249800 | -2.36073800 |
| H | 1.68084200  | -3.32128300 | -2.79539100 |
| H | 2.83002500  | -2.05271200 | -3.19490600 |
| N | 1.47237200  | -1.58860600 | -1.68628600 |
| C | 0.13115600  | -1.58656300 | -1.68835000 |
| N | -0.48354300 | -0.46013300 | -1.28309200 |
| C | -1.85969500 | -0.30520300 | -0.94276200 |
| C | -2.47902900 | -1.13668000 | -0.00825900 |
| C | -2.55856400 | 0.76832100  | -1.49844500 |
| C | -3.81185400 | -0.91385900 | 0.33480900  |
| C | -3.88792500 | 0.98727700  | -1.13761500 |
| H | -2.06165600 | 1.42940300  | -2.19857500 |
| C | -4.52527200 | 0.14405000  | -0.22803500 |
| H | -5.55955400 | 0.31469400  | 0.04520500  |
| C | -4.62842900 | 2.17552900  | -1.69628500 |
| C | -4.48683500 | -1.85514400 | 1.29732600  |
| F | -4.50330800 | 3.25949600  | -0.90236300 |
| F | -5.95153100 | 1.92268800  | -1.81490500 |
| F | -4.16849500 | 2.52089700  | -2.91828500 |
| F | -4.93087800 | -2.97119600 | 0.67388000  |
| F | -5.55260000 | -1.28654500 | 1.89813600  |
| F | -3.64041500 | -2.26539400 | 2.27089900  |
| S | -0.79017500 | -2.98583700 | -2.18146900 |
| H | -1.92336900 | -1.93994100 | 0.45837900  |
| H | 0.06915900  | 0.40500300  | -1.15103700 |
| H | 1.96091300  | -0.77076400 | -1.27470300 |

|   |             |             |             |
|---|-------------|-------------|-------------|
| C | 0.87003100  | -4.69073000 | -0.26875200 |
| H | 1.39961900  | -5.38129800 | -0.91915400 |
| H | 0.17853900  | -3.94328900 | -1.17632300 |
| H | -0.01649900 | -5.11035000 | 0.20529900  |
| N | 2.09142500  | 2.18562800  | 1.19897900  |
| S | 0.64463300  | 2.53415500  | 0.66499000  |
| O | -0.38945600 | 2.18994800  | 1.64783800  |
| O | 0.39713200  | 2.12675100  | -0.75206900 |
| C | 0.61837000  | 4.39989200  | 0.57663800  |
| F | 0.84568500  | 4.91725900  | 1.78868800  |
| F | -0.58091600 | 4.80891700  | 0.14844400  |
| F | 1.55578400  | 4.84329300  | -0.26656000 |
| C | 4.71290900  | -2.35734000 | -1.48569200 |
| H | 5.48442700  | -2.80184300 | -0.84530500 |
| H | 5.12093000  | -2.30214900 | -2.50232900 |
| H | 4.51452700  | -1.34229800 | -1.13084700 |
| C | 3.78856000  | -4.58320600 | -2.10571600 |
| H | 4.13568000  | -4.43785000 | -3.13581100 |
| H | 4.60209000  | -5.06588500 | -1.55236800 |
| H | 2.94675200  | -5.28057000 | -2.14674500 |
| C | 4.63060900  | 2.47157500  | -1.81099300 |
| H | 4.21341200  | 1.68643400  | -2.44794900 |
| H | 4.74158500  | 3.39479600  | -2.38293000 |
| H | 5.60976300  | 2.15404700  | -1.43449700 |
| C | 4.88593000  | 2.45044400  | 2.19718300  |
| H | 4.05090900  | 2.68389900  | 2.86268400  |
| H | 5.73802300  | 2.08309800  | 2.77265400  |
| H | 5.17547300  | 3.34922400  | 1.64249600  |

NTPA-2R

0 imaginary frequency

H = -3240.820973

G = -3240.946808

E(M06-2X-DCM) = -3241.305406

|   |             |             |             |
|---|-------------|-------------|-------------|
| O | 1.21037900  | 1.07065800  | -0.67193600 |
| O | -1.08820400 | 0.82719700  | 0.50903700  |
| P | -0.04573500 | 0.06172600  | -0.47418200 |
| O | -0.55896700 | -0.41632200 | -1.76512300 |
| C | 3.01636300  | 3.19881100  | 2.45361700  |
| C | 1.77378500  | 3.59270300  | 1.96865600  |
| C | 1.18152300  | 2.94250300  | 0.87188200  |
| C | 3.09088300  | 1.41466900  | 0.78986700  |
| C | 3.67855600  | 2.13617800  | 1.84070000  |
| C | -1.84491900 | 1.83626700  | -0.11886900 |

|   |             |             |             |
|---|-------------|-------------|-------------|
| C | -1.27656900 | 3.09968000  | -0.24651100 |
| C | -1.91965100 | 4.05959700  | -1.04223800 |
| C | -3.16368000 | 3.79048400  | -1.60338800 |
| C | -3.76555000 | 2.55445800  | -1.36251100 |
| C | -3.11942800 | 1.54159100  | -0.63371800 |
| H | 4.66362700  | 1.83623400  | 2.18589500  |
| H | -4.75044800 | 2.34403800  | -1.76861100 |
| C | -0.05726400 | 3.71891300  | 0.42610900  |
| C | -0.46047800 | 4.39471600  | 1.78089300  |
| H | -1.08738900 | 5.27907400  | 1.63348700  |
| H | -1.03356500 | 3.67455300  | 2.37595600  |
| H | -1.00025400 | 5.66360000  | -2.20045100 |
| H | -1.46655500 | 6.12926600  | -0.56845000 |
| C | 1.81344700  | 1.81504600  | 0.34805200  |
| H | 3.47194700  | 3.71483100  | 3.29479500  |
| H | -3.66882500 | 4.53178800  | -2.21743800 |
| C | 0.87939800  | 4.69994500  | 2.48036800  |
| H | 1.26725800  | 5.68727300  | 2.19333800  |
| H | 0.79771600  | 4.69975700  | 3.57313100  |
| C | -1.06312400 | 5.30140800  | -1.16810600 |
| C | 0.30254600  | 4.82465900  | -0.62307300 |
| H | 0.90411300  | 5.63081700  | -0.19168900 |
| H | 0.88489700  | 4.36784700  | -1.43153000 |
| C | -3.80908200 | 0.23411300  | -0.40320000 |
| C | -4.27952900 | -0.08199700 | 0.89508500  |
| C | -4.05904100 | -0.63986500 | -1.48812800 |
| C | -4.09490500 | 0.77866300  | 2.02441100  |
| C | -5.00665500 | -1.31212300 | 1.10759300  |
| C | -4.80876700 | -1.85510800 | -1.26316200 |
| C | -4.56551200 | 0.44082700  | 3.26647800  |
| H | -3.57658400 | 1.72124200  | 1.88721400  |
| C | -5.47627000 | -1.62983600 | 2.41991300  |
| C | -5.25444900 | -2.15959100 | 0.02499200  |
| C | -5.26150000 | -0.78350800 | 3.47351900  |
| H | -4.40909700 | 1.11493400  | 4.10469600  |
| H | -6.01271400 | -2.56541100 | 2.56005500  |
| H | -5.81149100 | -3.07989300 | 0.18949000  |
| H | -5.62314800 | -1.03721100 | 4.46631600  |
| C | 3.82604200  | 0.26967800  | 0.16486800  |
| C | 4.33168300  | 0.39052400  | -1.15302800 |
| C | 4.04756200  | -0.91747000 | 0.90796000  |
| C | 4.18112600  | 1.57953100  | -1.93581600 |
| C | 5.05202900  | -0.71347500 | -1.74499400 |
| C | 4.76691000  | -2.01607200 | 0.29960100  |



|   |             |             |             |
|---|-------------|-------------|-------------|
| C | 4.68601100  | 1.66466500  | -3.20674200 |
| H | 3.66233000  | 2.42872000  | -1.50571900 |
| C | 5.55772100  | -0.58565800 | -3.07633900 |
| C | 5.24631400  | -1.88344400 | -1.00575000 |
| C | 5.37991300  | 0.56739500  | -3.79119100 |
| H | 4.55742900  | 2.58003700  | -3.77790800 |
| H | 6.09076000  | -1.42983900 | -3.50697800 |
| H | 5.78433300  | -2.71350900 | -1.45888400 |
| H | 5.76853200  | 0.65306900  | -4.80208900 |
| C | -3.87386100 | -1.24277700 | -3.84791200 |
| H | -3.49892800 | -1.02826800 | -4.84505500 |
| C | -3.59162700 | -0.38477300 | -2.81783600 |
| H | -2.97910200 | 0.48985400  | -2.99842100 |
| C | -4.63561800 | -2.42517800 | -3.62565600 |
| H | -4.84873700 | -3.09279100 | -4.45634300 |
| C | -5.08105200 | -2.72296300 | -2.36666900 |
| H | -5.65111400 | -3.62983700 | -2.17831900 |
| C | 3.76489600  | -2.28305400 | 2.92060700  |
| H | 3.36817100  | -2.40145100 | 3.92436500  |
| C | 4.48071300  | -3.35455300 | 2.31804000  |
| H | 4.63143300  | -4.27805500 | 2.86943800  |
| C | 4.96692900  | -3.21886400 | 1.04560600  |
| H | 5.51151900  | -4.03155400 | 0.57094000  |
| C | 3.56134800  | -1.10599700 | 2.24563900  |
| H | 3.02064000  | -0.29968000 | 2.72994100  |
| N | 0.58382000  | -1.10403200 | 0.59789800  |
| H | 1.55680300  | -1.04461600 | 0.89930200  |
| S | -0.19264600 | -2.50179000 | 1.10611800  |
| C | 0.41483700  | -3.75970400 | -0.14540500 |
| O | -1.62178300 | -2.34267700 | 0.90371700  |
| O | 0.40324400  | -2.89350600 | 2.37626700  |
| F | -0.03513600 | -3.46345200 | -1.35723000 |
| F | 1.75210800  | -3.75882000 | -0.14849200 |
| F | -0.02712000 | -4.96358500 | 0.22106600  |

NTPA-2R'

0 imaginary frequency

H = -3240.815105

G = -3240.939264

E(M06-2X-DCM) = -3241.302876

|   |             |            |             |
|---|-------------|------------|-------------|
| O | -1.23233500 | 1.07818800 | 0.59629600  |
| O | 1.03258900  | 0.78124700 | -0.58712000 |
| P | -0.07793700 | 0.00652000 | 0.28909200  |
| C | -3.27061200 | 2.68509900 | -2.69647800 |

|   |             |             |             |
|---|-------------|-------------|-------------|
| C | -2.04084000 | 3.20527400  | -2.30758100 |
| C | -1.39708500 | 2.73063800  | -1.15388200 |
| C | -3.20834800 | 1.11768400  | -0.81600100 |
| C | -3.85629200 | 1.67716900  | -1.93087600 |
| C | 1.67846200  | 1.90822000  | -0.03492700 |
| C | 1.04522100  | 3.14643500  | -0.08458800 |
| C | 1.62668100  | 4.22839900  | 0.59689800  |
| C | 2.86322700  | 4.09541700  | 1.21873100  |
| C | 3.52379000  | 2.86802700  | 1.16404900  |
| C | 2.94501600  | 1.74264400  | 0.55508300  |
| H | -4.82936200 | 1.28342300  | -2.20780700 |
| H | 4.50217900  | 2.75747800  | 1.62195400  |
| C | -0.19757300 | 3.61653700  | -0.83377000 |
| C | 0.15827900  | 4.12728500  | -2.27091800 |
| H | 0.74112600  | 5.05321600  | -2.25209900 |
| H | 0.75903600  | 3.36394800  | -2.77856000 |
| H | 0.63049100  | 5.93639400  | 1.51694200  |
| H | 1.09635700  | 6.18945700  | -0.16177100 |
| C | -1.95189800 | 1.65007500  | -0.47502100 |
| H | -3.77665600 | 3.05955100  | -3.58266600 |
| H | 3.31556300  | 4.93528200  | 1.73983600  |
| C | -1.20634400 | 4.27418500  | -2.97922000 |
| H | -1.63463300 | 5.27383400  | -2.82162800 |
| H | -1.13631800 | 4.13003400  | -4.06321500 |
| C | 0.71888400  | 5.43768300  | 0.54529200  |
| C | -0.61621300 | 4.83103000  | 0.06327100  |
| H | -1.25149800 | 5.54391600  | -0.47084600 |
| H | -1.18391500 | 4.45609300  | 0.92260100  |
| C | 3.69467800  | 0.44735300  | 0.52937200  |
| C | 4.24178400  | -0.01768800 | -0.69200700 |
| C | 3.92091900  | -0.26566600 | 1.73214700  |
| C | 4.08268400  | 0.67891200  | -1.93285800 |
| C | 5.01893600  | -1.23595200 | -0.70569200 |
| C | 4.70982700  | -1.47717600 | 1.70324000  |
| C | 4.62581100  | 0.19941600  | -3.09610800 |
| H | 3.52538400  | 1.60895200  | -1.94564400 |
| C | 5.56405200  | -1.70442800 | -1.94169500 |
| C | 5.23124100  | -1.92926500 | 0.48865200  |
| C | 5.37313400  | -1.01228500 | -3.10660100 |
| H | 4.48794500  | 0.74988000  | -4.02293000 |
| H | 6.13885500  | -2.62745800 | -1.93212700 |
| H | 5.81971200  | -2.84436600 | 0.47273600  |
| H | 5.79260700  | -1.37865900 | -4.03949400 |
| C | -3.87182400 | 0.02399300  | -0.04177000 |

|   |             |             |             |
|---|-------------|-------------|-------------|
| C | -4.29397300 | 0.26270200  | 1.29035600  |
| C | -4.14196400 | -1.21849800 | -0.66759800 |
| C | -4.10369300 | 1.51398300  | 1.96068400  |
| C | -4.97850700 | -0.78244700 | 2.01667400  |
| C | -4.85108200 | -2.24313700 | 0.06500300  |
| C | -4.52388400 | 1.70693900  | 3.25086600  |
| H | -3.62552700 | 2.32867600  | 1.42837300  |
| C | -5.39373000 | -0.54322700 | 3.36395900  |
| C | -5.23946400 | -2.00097400 | 1.38454200  |
| C | -5.17128600 | 0.66313200  | 3.97042000  |
| H | -4.36544200 | 2.66883700  | 3.73142000  |
| H | -5.89774200 | -1.34713800 | 3.89533300  |
| H | -5.76311000 | -2.78084900 | 1.93380400  |
| H | -5.49281500 | 0.83256000  | 4.99441600  |
| C | 3.63422100  | -0.56554400 | 4.14122600  |
| H | 3.21445700  | -0.22966500 | 5.08561600  |
| C | 3.39002900  | 0.14890800  | 2.99737900  |
| H | 2.77102000  | 1.03710900  | 3.04014800  |
| C | 4.42381200  | -1.75026800 | 4.10811200  |
| H | 4.60452800  | -2.30296900 | 5.02584800  |
| C | 4.94069000  | -2.19137900 | 2.92063800  |
| H | 5.53684600  | -3.09970200 | 2.87763400  |
| C | -4.03371200 | -2.73212900 | -2.58229700 |
| H | -3.70286500 | -2.94067500 | -3.59612100 |
| C | -4.75495600 | -3.72674600 | -1.86411200 |
| H | -4.97894200 | -4.67799700 | -2.33880900 |
| C | -5.14253100 | -3.48807900 | -0.57464000 |
| H | -5.67765700 | -4.24447400 | -0.00558700 |
| C | -3.73287700 | -1.52696100 | -2.00520400 |
| H | -3.15506900 | -0.79725100 | -2.55947600 |
| N | -0.57154300 | -1.24822400 | -0.53737000 |
| S | -0.25849800 | -2.77435800 | -0.13448000 |
| C | 1.10076100  | -3.23109000 | -1.32982900 |
| O | -1.37189600 | -3.66076200 | -0.43766400 |
| O | 0.38726000  | -2.86395600 | 1.20549400  |
| F | 2.13876300  | -2.40471700 | -1.16366000 |
| F | 1.49319600  | -4.48428900 | -1.09104600 |
| F | 0.66114900  | -3.13903300 | -2.58514800 |
| O | 0.48400100  | -0.26789100 | 1.73797400  |
| H | 0.60562400  | -1.25542700 | 1.85034100  |

NTPA-2R'-1

0 imaginary frequency

H = -3240.814424

G = -3240.937395

E(M06-2X-DCM) = -3241.302748

|   |             |             |             |
|---|-------------|-------------|-------------|
| O | -0.89169200 | 1.11370100  | 0.64817700  |
| O | 1.32275300  | 0.77781800  | -0.63292700 |
| P | 0.15775100  | 0.00168400  | 0.17090300  |
| C | -2.71656300 | 3.53222500  | -2.25187600 |
| C | -1.42904500 | 3.81607000  | -1.81040700 |
| C | -0.84116700 | 3.06500800  | -0.77920600 |
| C | -2.84402500 | 1.65700500  | -0.68360500 |
| C | -3.42151900 | 2.48449800  | -1.66252100 |
| C | 2.12454900  | 1.70213800  | 0.06720200  |
| C | 1.65143400  | 2.99452100  | 0.26105500  |
| C | 2.37799500  | 3.86233400  | 1.09219700  |
| C | 3.60474300  | 3.47513200  | 1.62074300  |
| C | 4.10458800  | 2.20591100  | 1.32502600  |
| C | 3.37197800  | 1.28138200  | 0.56300600  |
| H | -4.43949600 | 2.27372300  | -1.97494500 |
| H | 5.07202000  | 1.90056800  | 1.71237400  |
| C | 0.46286000  | 3.73130200  | -0.34463100 |
| C | 0.86485600  | 4.44620800  | -1.67894200 |
| H | 1.55913900  | 5.27561800  | -1.51400200 |
| H | 1.36084900  | 3.71967100  | -2.33261400 |
| H | 1.61227700  | 5.47781300  | 2.34176900  |
| H | 2.07106700  | 5.97731600  | 0.71748900  |
| C | -1.52634500 | 1.95452600  | -0.29068700 |
| H | -3.17528000 | 4.12213100  | -3.04124100 |
| H | 4.17273900  | 4.14933400  | 2.25669600  |
| C | -0.47637200 | 4.88175500  | -2.30534500 |
| H | -0.77761200 | 5.87946000  | -1.95686400 |
| H | -0.43602500 | 4.93000200  | -3.39929200 |
| C | 1.62103800  | 5.15720800  | 1.29400200  |
| C | 0.21182000  | 4.80568300  | 0.76773300  |
| H | -0.34196800 | 5.67208200  | 0.39378300  |
| H | -0.38035100 | 4.35157600  | 1.57057500  |
| C | 3.92339900  | -0.08322500 | 0.29423500  |
| C | 4.32922100  | -0.42761600 | -1.01909600 |
| C | 4.08251500  | -1.00645600 | 1.35727100  |
| C | 4.24008200  | 0.47725000  | -2.12518200 |
| C | 4.88297700  | -1.73787800 | -1.27249700 |
| C | 4.65136900  | -2.30836700 | 1.08888300  |
| C | 4.64159600  | 0.10952700  | -3.38270100 |
| H | 3.85363300  | 1.47636700  | -1.95723400 |
| C | 5.28316600  | -2.08420500 | -2.60067900 |
| C | 5.02836600  | -2.63879100 | -0.21465800 |

|   |             |             |             |
|---|-------------|-------------|-------------|
| C | 5.16473100  | -1.19103400 | -3.63031000 |
| H | 4.56171000  | 0.81793400  | -4.20296500 |
| H | 5.68578300  | -3.07948300 | -2.77220700 |
| H | 5.44518100  | -3.62418000 | -0.41171000 |
| H | 5.47062700  | -1.46645200 | -4.63573100 |
| C | -3.65789100 | 0.54898700  | -0.09465700 |
| C | -4.03353700 | 0.59761800  | 1.27184200  |
| C | -4.14287100 | -0.48657400 | -0.93267700 |
| C | -3.62632000 | 1.64417800  | 2.16065700  |
| C | -4.89706500 | -0.42979800 | 1.80858400  |
| C | -5.04525500 | -1.47743400 | -0.39061500 |
| C | -4.00513900 | 1.65384700  | 3.47762900  |
| H | -3.01167100 | 2.45079400  | 1.77788500  |
| C | -5.26245800 | -0.38772900 | 3.19051200  |
| C | -5.38481000 | -1.42969500 | 0.96327900  |
| C | -4.82712400 | 0.61961300  | 4.00769300  |
| H | -3.67822800 | 2.46202700  | 4.12651400  |
| H | -5.90344500 | -1.17731700 | 3.57557200  |
| H | -6.05415900 | -2.18581800 | 1.36882500  |
| H | -5.11257600 | 0.64100600  | 5.05583500  |
| C | 3.85707400  | -1.64413800 | 3.70743400  |
| H | 3.54335500  | -1.40223800 | 4.71945000  |
| C | 3.68593000  | -0.72374700 | 2.70580900  |
| H | 3.22918700  | 0.23327000  | 2.92874200  |
| C | 4.43386400  | -2.91798900 | 3.43887800  |
| H | 4.56012500  | -3.63365700 | 4.24649200  |
| C | 4.81394300  | -3.23707300 | 2.16389400  |
| H | 5.24385900  | -4.21026900 | 1.93978700  |
| C | -4.30022900 | -1.60203500 | -3.10215600 |
| H | -3.99618400 | -1.67727900 | -4.14253300 |
| C | -5.22536800 | -2.54593600 | -2.57307300 |
| H | -5.63390800 | -3.31936600 | -3.21760700 |
| C | -5.57531700 | -2.48862600 | -1.25182200 |
| H | -6.26293100 | -3.21607000 | -0.82676600 |
| C | -3.77497500 | -0.61353400 | -2.31171800 |
| H | -3.05144800 | 0.07698100  | -2.72821000 |
| N | -0.45029400 | -1.09650900 | -0.79267100 |
| S | -0.01789600 | -2.64773100 | -0.69902300 |
| C | -1.58492900 | -3.45073000 | -0.07634300 |
| O | 0.95976900  | -2.87532700 | 0.40121800  |
| O | 0.24394000  | -3.23610700 | -2.00527000 |
| F | -1.31572100 | -4.71756200 | 0.25154300  |
| F | -2.02669100 | -2.80326900 | 1.00846600  |
| F | -2.52426800 | -3.43217600 | -1.01836900 |

|   |            |             |            |
|---|------------|-------------|------------|
| O | 0.71432400 | -0.48241100 | 1.56956500 |
| H | 0.99860200 | -1.43376700 | 1.47786000 |

NTPA-2R' -2

0 imaginary frequency

H = -3240.805121

G = -3240.929781

E(M06-2X-DCM) = -3241.298742

|   |             |             |             |
|---|-------------|-------------|-------------|
| O | 1.20409900  | -0.92438500 | 0.36613900  |
| O | -1.16837400 | -0.34272100 | -0.51888900 |
| P | 0.03615200  | 0.17973200  | 0.42123600  |
| C | 3.17036900  | -1.15711000 | -3.32047700 |
| C | 1.92918800  | -1.76108400 | -3.14950500 |
| C | 1.32086100  | -1.79530200 | -1.88545400 |
| C | 3.19747200  | -0.52600900 | -0.95672900 |
| C | 3.81251500  | -0.59289400 | -2.21795900 |
| C | -1.70753300 | -1.63194400 | -0.37639300 |
| C | -1.05598400 | -2.70694700 | -0.97010800 |
| C | -1.55569700 | -4.00006300 | -0.74224800 |
| C | -2.72066500 | -4.19654900 | -0.00810200 |
| C | -3.39409400 | -3.09117000 | 0.51378200  |
| C | -2.89919400 | -1.78773900 | 0.35498500  |
| H | 4.80355900  | -0.16378700 | -2.32931300 |
| H | -4.31454600 | -3.22956100 | 1.07344700  |
| C | 0.13743700  | -2.76095500 | -1.91949500 |
| C | -0.28582600 | -2.61973200 | -3.41853500 |
| H | -0.87213500 | -3.47495500 | -3.76942600 |
| H | -0.90121500 | -1.71977500 | -3.52801800 |
| H | -0.47584400 | -5.89597400 | -0.71570800 |
| H | -1.08412100 | -5.42759500 | -2.30073000 |
| C | 1.91398800  | -1.08812100 | -0.84439700 |
| H | 3.64686100  | -1.13532400 | -4.29709500 |
| H | -3.10581000 | -5.19873900 | 0.16139800  |
| C | 1.04817200  | -2.43655600 | -4.17910200 |
| H | 1.46649800  | -3.40196100 | -4.49610200 |
| H | 0.93292800  | -1.83065200 | -5.08459100 |
| C | -0.64989400 | -5.03496900 | -1.37064400 |
| C | 0.63326300  | -4.22494100 | -1.64687200 |
| H | 1.23044200  | -4.62137900 | -2.47303100 |
| H | 1.26501000  | -4.22079600 | -0.75109100 |
| C | -3.64333500 | -0.62132500 | 0.93029400  |
| C | -4.39088000 | 0.22087500  | 0.07141900  |
| C | -3.64007200 | -0.39285600 | 2.32868500  |
| C | -4.47993400 | 0.00450100  | -1.34067400 |

|   |             |             |             |
|---|-------------|-------------|-------------|
| C | -5.12026300 | 1.33879000  | 0.62559100  |
| C | -4.38428000 | 0.72404500  | 2.87026000  |
| C | -5.21385300 | 0.83735400  | -2.14375500 |
| H | -3.95508000 | -0.83822300 | -1.77643600 |
| C | -5.86554000 | 2.18967100  | -0.24895200 |
| C | -5.09402700 | 1.56090800  | 2.00494300  |
| C | -5.91275000 | 1.94998300  | -1.59541600 |
| H | -5.26279700 | 0.65058400  | -3.21295800 |
| H | -6.39964800 | 3.03166800  | 0.18453000  |
| H | -5.64572500 | 2.40340800  | 2.41680900  |
| H | -6.48371100 | 2.60245500  | -2.25003200 |
| C | 3.92519200  | 0.06557200  | 0.20945000  |
| C | 4.32614000  | -0.77753900 | 1.27759700  |
| C | 4.27549500  | 1.43826100  | 0.21273500  |
| C | 4.05489600  | -2.18357700 | 1.31174200  |
| C | 5.07319900  | -0.22010800 | 2.38229000  |
| C | 5.04029300  | 1.97518900  | 1.31677400  |
| C | 4.45814300  | -2.96718100 | 2.36145800  |
| H | 3.52858400  | -2.63751800 | 0.47963100  |
| C | 5.46862700  | -1.07039600 | 3.46190700  |
| C | 5.41005800  | 1.13589400  | 2.36998300  |
| C | 5.16858100  | -2.40548500 | 3.45953800  |
| H | 4.23829100  | -4.03161300 | 2.35532300  |
| H | 6.02184300  | -0.62732900 | 4.28682500  |
| H | 5.97868200  | 1.54789600  | 3.20147100  |
| H | 5.47672500  | -3.04107100 | 4.28527600  |
| C | -2.93592700 | -0.96542600 | 4.60037900  |
| H | -2.37656100 | -1.60665000 | 5.27599200  |
| C | -2.91760200 | -1.21885600 | 3.25295600  |
| H | -2.34083400 | -2.05242500 | 2.86921100  |
| C | -3.67613300 | 0.13157000  | 5.12720100  |
| H | -3.67788300 | 0.31514900  | 6.19793600  |
| C | -4.37589700 | 0.95040700  | 4.28276500  |
| H | -4.94171600 | 1.79412600  | 4.67044600  |
| C | 4.24326700  | 3.66564800  | -0.78884000 |
| H | 3.90871300  | 4.33153500  | -1.57834000 |
| C | 5.01636300  | 4.18312300  | 0.28812200  |
| H | 5.28784800  | 5.23522400  | 0.29891800  |
| C | 5.39840900  | 3.35937900  | 1.31179700  |
| H | 5.97811600  | 3.74276300  | 2.14833400  |
| C | 3.88871200  | 2.34246700  | -0.82789100 |
| H | 3.27824300  | 1.97854200  | -1.64567000 |
| N | 0.32610700  | 1.68671500  | 0.12404800  |
| S | 0.28116700  | 2.56123000  | -1.24339300 |

|   |             |             |             |
|---|-------------|-------------|-------------|
| C | -1.56148200 | 2.77013000  | -1.58462100 |
| O | 0.79790000  | 1.83087200  | -2.40756600 |
| O | 0.75725300  | 3.90781200  | -0.94589800 |
| F | -2.01926400 | 1.74772200  | -2.31064600 |
| F | -2.25303800 | 2.83821100  | -0.43949800 |
| F | -1.74114900 | 3.90187600  | -2.26892800 |
| O | -0.34096000 | -0.04751500 | 1.95103600  |
| H | -0.98537000 | 0.60293500  | 2.28058400  |

NTPA-2R-1

0 imaginary frequency

H = -3240.813507

G = -3240.938401

E(M06-2X-DCM) = -3241.296948

|   |             |             |             |
|---|-------------|-------------|-------------|
| O | 0.95572800  | -1.07033500 | -0.09212600 |
| O | -1.30912300 | 0.07386000  | -0.55487500 |
| P | -0.15668500 | -0.08903300 | 0.55961100  |
| O | -0.49425100 | -0.51770600 | 1.92544100  |
| C | 3.15912200  | 0.41782600  | -3.31270200 |
| C | 1.85343700  | -0.02034100 | -3.50655400 |
| C | 1.14993900  | -0.65188700 | -2.46775100 |
| C | 3.06460700  | -0.31843300 | -0.98341700 |
| C | 3.77050300  | 0.21603000  | -2.07247500 |
| C | -1.94082300 | -1.04060700 | -1.12614900 |
| C | -1.34501000 | -1.66500700 | -2.21765700 |
| C | -1.95197500 | -2.81999000 | -2.73822500 |
| C | -3.15906400 | -3.28551300 | -2.22773400 |
| C | -3.76452300 | -2.59939700 | -1.17512700 |
| C | -3.16683700 | -1.47173000 | -0.59056200 |
| H | 4.80888400  | 0.49945500  | -1.92726000 |
| H | -4.71230200 | -2.94545700 | -0.77363700 |
| C | -0.10806800 | -1.30447300 | -3.03633600 |
| C | -0.41346100 | -0.32371500 | -4.21442400 |
| H | -1.04957900 | -0.77719200 | -4.98116100 |
| H | -0.92954100 | 0.55584600  | -3.81623000 |
| H | -1.03385500 | -4.50888600 | -3.77129300 |
| H | -1.51280500 | -3.18343400 | -4.82818200 |
| C | 1.72055500  | -0.68015400 | -1.20017600 |
| H | 3.70939900  | 0.89650700  | -4.11876300 |
| H | -3.62632600 | -4.17709800 | -2.63810100 |
| C | 0.98309900  | 0.08543300  | -4.74198100 |
| H | 1.32921700  | -0.58892200 | -5.53739500 |
| H | 0.98922500  | 1.09734900  | -5.16209600 |
| C | -1.10162900 | -3.41714200 | -3.83600800 |



|   |             |             |             |
|---|-------------|-------------|-------------|
| C | 0.25471200  | -2.72030100 | -3.61212300 |
| H | 0.86843700  | -2.65733700 | -4.51535600 |
| H | 0.82841900  | -3.27007700 | -2.85683000 |
| C | -3.84246200 | -0.77343500 | 0.54795100  |
| C | -4.46784400 | 0.47763400  | 0.33052900  |
| C | -3.90262200 | -1.39532300 | 1.81770900  |
| C | -4.46174100 | 1.14100800  | -0.93824600 |
| C | -5.16659700 | 1.12121800  | 1.41939800  |
| C | -4.61782900 | -0.74625800 | 2.89303600  |
| C | -5.07801700 | 2.35225300  | -1.11266300 |
| H | -3.95840700 | 0.66987500  | -1.77535500 |
| C | -5.79556600 | 2.38543800  | 1.19492000  |
| C | -5.22518600 | 0.49122400  | 2.66543600  |
| C | -5.75256900 | 2.98863900  | -0.03254200 |
| H | -5.05211200 | 2.83547700  | -2.08557600 |
| H | -6.31159600 | 2.85734200  | 2.02784600  |
| H | -5.75873600 | 0.97725200  | 3.47998700  |
| H | -6.23218900 | 3.95090600  | -0.18953100 |
| C | 3.73764300  | -0.55071300 | 0.33444400  |
| C | 3.96854500  | -1.88087000 | 0.77030600  |
| C | 4.18482100  | 0.53876800  | 1.12046300  |
| C | 3.59652100  | -3.02972000 | 0.00075700  |
| C | 4.63145200  | -2.11366100 | 2.03340100  |
| C | 4.85605600  | 0.29035700  | 2.37694300  |
| C | 3.83514500  | -4.30161700 | 0.45166500  |
| H | 3.12529800  | -2.88450600 | -0.96458200 |
| C | 4.85462400  | -3.45644000 | 2.47137400  |
| C | 5.05351000  | -1.02516200 | 2.80139100  |
| C | 4.46622100  | -4.52341900 | 1.70801100  |
| H | 3.54265000  | -5.15315400 | -0.15690300 |
| H | 5.34652200  | -3.60860000 | 3.42915500  |
| H | 5.55235100  | -1.20771700 | 3.75103800  |
| H | 4.64233700  | -5.53911200 | 2.05134000  |
| C | -3.36086800 | -3.22713600 | 3.34087500  |
| H | -2.86587800 | -4.17579900 | 3.53016400  |
| C | -3.27137900 | -2.64911200 | 2.10207400  |
| H | -2.70226400 | -3.13904500 | 1.32032000  |
| C | -4.08328900 | -2.59250500 | 4.39099900  |
| H | -4.14258500 | -3.06687600 | 5.36685600  |
| C | -4.68811700 | -1.38510200 | 4.17040000  |
| H | -5.23397200 | -0.88353400 | 4.96617200  |
| C | 4.43211700  | 2.93877900  | 1.51526300  |
| H | 4.26364300  | 3.96310000  | 1.19502700  |
| C | 5.10132800  | 2.68806600  | 2.74688700  |

|   |             |            |             |
|---|-------------|------------|-------------|
| H | 5.44573100  | 3.52143900 | 3.35306900  |
| C | 5.30222000  | 1.39956300 | 3.16206800  |
| H | 5.80683600  | 1.19212300 | 4.10275300  |
| C | 3.99017200  | 1.90293700 | 0.73379100  |
| H | 3.47901900  | 2.10844800 | -0.19697100 |
| N | 0.43173300  | 1.53358800 | 0.49173100  |
| H | 0.63921300  | 1.86194700 | 1.43597400  |
| S | -0.29529400 | 2.78542000 | -0.41763600 |
| C | 1.02316600  | 4.10360100 | -0.17713400 |
| O | -1.47537100 | 3.31509200 | 0.25245100  |
| O | -0.28694300 | 2.43165100 | -1.82916800 |
| F | 0.48431900  | 5.27302300 | -0.50877000 |
| F | 1.40335100  | 4.13581000 | 1.10749700  |
| F | 2.08269000  | 3.87285400 | -0.95016900 |

NTPA-2R-2

0 imaginary frequency

H = -3240.820887

G = -3240.944275

E(M06-2X-DCM) = -3241.306621

|   |             |             |             |
|---|-------------|-------------|-------------|
| O | -1.25957000 | 0.93502000  | 0.38373500  |
| O | 1.09126900  | 0.26184600  | -0.44426100 |
| P | -0.06474100 | -0.13102000 | 0.61907600  |
| O | 0.25234200  | -0.24156200 | 2.05094200  |
| C | -3.19585200 | 1.04096600  | -3.32270300 |
| C | -1.94842200 | 1.63514300  | -3.16853800 |
| C | -1.34252600 | 1.71007900  | -1.90450200 |
| C | -3.22565600 | 0.48286400  | -0.94287900 |
| C | -3.84209500 | 0.51348300  | -2.20380200 |
| C | 1.67684200  | 1.54100500  | -0.37017100 |
| C | 1.05250000  | 2.60259900  | -1.02009100 |
| C | 1.58137200  | 3.89409200  | -0.85760200 |
| C | 2.74732900  | 4.10258400  | -0.12965800 |
| C | 3.39154200  | 3.01014700  | 0.44984800  |
| C | 2.86994600  | 1.71010500  | 0.35709100  |
| H | -4.83545500 | 0.08594700  | -2.30296000 |
| H | 4.31115500  | 3.15494400  | 1.00903100  |
| C | -0.13660200 | 2.64239600  | -1.97668400 |
| C | 0.28781800  | 2.42139600  | -3.46565500 |
| H | 0.90272500  | 3.24047900  | -3.85196000 |
| H | 0.87292500  | 1.49722200  | -3.53067800 |
| H | 0.55054600  | 5.81544000  | -0.92719500 |
| H | 1.14677400  | 5.25414900  | -2.48653000 |
| C | -1.93997500 | 1.04740000  | -0.83798100 |

|   |             |             |             |
|---|-------------|-------------|-------------|
| H | -3.67066200 | 0.99170600  | -4.29922100 |
| H | 3.15349200  | 5.10352600  | -0.00824500 |
| C | -1.04917400 | 2.24607000  | -4.22247800 |
| H | -1.43992700 | 3.20939000  | -4.57857100 |
| H | -0.95023900 | 1.60120200  | -5.10265900 |
| C | 0.70305200  | 4.91895600  | -1.53851500 |
| C | -0.59866600 | 4.12843100  | -1.77564400 |
| H | -1.18751000 | 4.49862700  | -2.61986500 |
| H | -1.22925300 | 4.18144100  | -0.88059200 |
| C | 3.61094200  | 0.57901500  | 1.00355600  |
| C | 4.42437900  | -0.26195900 | 0.20700900  |
| C | 3.56759800  | 0.41249800  | 2.40774900  |
| C | 4.56737900  | -0.09177000 | -1.20737000 |
| C | 5.17613100  | -1.32602200 | 0.83265900  |
| C | 4.33891200  | -0.64497000 | 3.02200600  |
| C | 5.36828900  | -0.92065300 | -1.94922200 |
| H | 4.02938000  | 0.71403700  | -1.69468800 |
| C | 5.99030300  | -2.17600900 | 0.02069500  |
| C | 5.10900100  | -1.49000400 | 2.21893500  |
| C | 6.08589900  | -1.98407600 | -1.33134000 |
| H | 5.45897500  | -0.76658800 | -3.02121100 |
| H | 6.54113400  | -2.97747500 | 0.50750700  |
| H | 5.68201700  | -2.28842300 | 2.68641600  |
| H | 6.71222800  | -2.63417500 | -1.93615100 |
| C | -3.94140200 | -0.09255400 | 0.23930300  |
| C | -4.36380700 | 0.76637500  | 1.28564400  |
| C | -4.24342200 | -1.47590300 | 0.28933600  |
| C | -4.14161700 | 2.18091000  | 1.27065600  |
| C | -5.07649600 | 0.21709700  | 2.41653400  |
| C | -4.96459200 | -2.00911600 | 1.42435500  |
| C | -4.56537700 | 2.98288200  | 2.29782700  |
| H | -3.63534700 | 2.62322300  | 0.42022200  |
| C | -5.49484900 | 1.08724700  | 3.47137900  |
| C | -5.35432600 | -1.15174500 | 2.45582100  |
| C | -5.24591300 | 2.43167700  | 3.42008700  |
| H | -4.38352500 | 4.05353600  | 2.25645900  |
| H | -6.02189800 | 0.65189700  | 4.31711500  |
| H | -5.89152700 | -1.55939200 | 3.30988600  |
| H | -5.57006300 | 3.08271800  | 4.22735100  |
| C | 2.78694100  | 1.07465000  | 4.62469100  |
| H | 2.18232900  | 1.72341500  | 5.25237100  |
| C | 2.78872100  | 1.25259900  | 3.26684600  |
| H | 2.18094700  | 2.03350400  | 2.82543800  |
| C | 3.55485600  | 0.03664800  | 5.22532200  |

|   |             |             |             |
|---|-------------|-------------|-------------|
| H | 3.53702800  | -0.09000700 | 6.30442900  |
| C | 4.30301300  | -0.80025000 | 4.44316100  |
| H | 4.88937400  | -1.60093400 | 4.88785100  |
| C | -4.14519900 | -3.73247400 | -0.64863600 |
| H | -3.81322600 | -4.40548400 | -1.43342500 |
| C | -4.86516900 | -4.24852100 | 0.46594000  |
| H | -5.09246600 | -5.30988700 | 0.51567000  |
| C | -5.26008900 | -3.40771200 | 1.47103900  |
| H | -5.80591700 | -3.78811400 | 2.33133500  |
| C | -3.84859000 | -2.39686900 | -0.73459900 |
| H | -3.29905500 | -2.02482300 | -1.59114600 |
| N | -0.48184800 | -1.64467100 | -0.05131300 |
| H | -0.75969700 | -2.33782500 | 0.64035500  |
| S | -0.24708100 | -2.35448400 | -1.55958300 |
| C | 1.62942500  | -2.54748100 | -1.73331100 |
| O | -0.65386200 | -1.44675900 | -2.62190300 |
| O | -0.77115900 | -3.70894100 | -1.42460300 |
| F | 1.84603200  | -3.67534600 | -2.40968900 |
| F | 2.12517900  | -1.52267400 | -2.41532600 |
| F | 2.19830800  | -2.62950700 | -0.53363700 |

NTPA-2R-3

0 imaginary frequency

H = -3240.820890

G = -3240.944266

E(M06-2X-DCM) = -3241.306619

|   |             |             |             |
|---|-------------|-------------|-------------|
| O | -1.25963700 | 0.93502400  | 0.38425400  |
| O | 1.09120100  | 0.26207600  | -0.44387100 |
| P | -0.06494600 | -0.13141400 | 0.61908900  |
| O | 0.25185900  | -0.24292700 | 2.05094900  |
| C | -3.19585600 | 1.04284600  | -3.32217200 |
| C | -1.94843500 | 1.63698700  | -3.16765900 |
| C | -1.34257400 | 1.71123600  | -1.90357400 |
| C | -3.22566700 | 0.48343800  | -0.94263300 |
| C | -3.84208400 | 0.51472200  | -2.20357100 |
| C | 1.67683200  | 1.54116900  | -0.36927200 |
| C | 1.05253700  | 2.60311400  | -1.01864800 |
| C | 1.58157700  | 3.89448900  | -0.85563300 |
| C | 2.74768900  | 4.10253000  | -0.12782800 |
| C | 3.39186600  | 3.00973900  | 0.45110000  |
| C | 2.87007200  | 1.70982600  | 0.35790400  |
| H | -4.83542300 | 0.08718700  | -2.30298200 |
| H | 4.31160500  | 3.15417400  | 1.01017800  |
| C | -0.13661500 | 2.64354400  | -1.97518900 |

|   |             |             |             |
|---|-------------|-------------|-------------|
| C | 0.28785000  | 2.42326700  | -3.46430100 |
| H | 0.90287100  | 3.24248500  | -3.85015100 |
| H | 0.87284400  | 1.49905300  | -3.52974900 |
| H | 0.55080600  | 5.81586200  | -0.92390500 |
| H | 1.14689300  | 5.25565400  | -2.48368200 |
| C | -1.94003300 | 1.04797900  | -0.83740800 |
| H | -3.67062200 | 0.99405200  | -4.29873700 |
| H | 3.15399800  | 5.10336900  | -0.00604400 |
| C | -1.04915000 | 2.24850700  | -4.22123300 |
| H | -1.43981500 | 3.21213600  | -4.57661600 |
| H | -0.95031500 | 1.60427400  | -5.10188500 |
| C | 0.70324400  | 4.91980200  | -1.53587200 |
| C | -0.59854200 | 4.12948100  | -1.77338900 |
| H | -1.18732200 | 4.50015200  | -2.61745100 |
| H | -1.22918000 | 4.18212000  | -0.87835400 |
| C | 3.61091400  | 0.57836400  | 1.00390900  |
| C | 4.42438200  | -0.26228900 | 0.20705000  |
| C | 3.56737100  | 0.41116200  | 2.40801000  |
| C | 4.56753200  | -0.09141700 | -1.20723300 |
| C | 5.17592000  | -1.32676300 | 0.83225800  |
| C | 4.33845500  | -0.64673700 | 3.02183600  |
| C | 5.36843300  | -0.92002500 | -1.94941400 |
| H | 4.02969000  | 0.71471300  | -1.69419400 |
| C | 5.99009000  | -2.17643400 | 0.01996000  |
| C | 5.10855000  | -1.49146000 | 2.21844300  |
| C | 6.08585900  | -1.98383600 | -1.33197500 |
| H | 5.45928300  | -0.76541700 | -3.02131300 |
| H | 6.54077600  | -2.97821400 | 0.50642400  |
| H | 5.68132300  | -2.29025300 | 2.68559100  |
| H | 6.71216900  | -2.63372100 | -1.93704000 |
| C | -3.94135200 | -0.09271700 | 0.23921500  |
| C | -4.36375300 | 0.76555900  | 1.28609900  |
| C | -4.24320200 | -1.47611700 | 0.28846700  |
| C | -4.14180700 | 2.18013900  | 1.27186500  |
| C | -5.07614400 | 0.21552200  | 2.41681300  |
| C | -4.96411000 | -2.01009900 | 1.42329700  |
| C | -4.56554000 | 2.98146600  | 2.29955600  |
| H | -3.63578800 | 2.62302300  | 0.42157200  |
| C | -5.49443400 | 1.08500200  | 3.47223800  |
| C | -5.35374800 | -1.15339600 | 2.45536000  |
| C | -5.24575500 | 2.42951100  | 3.42164900  |
| H | -4.38391800 | 4.05218100  | 2.25872300  |
| H | -6.02123900 | 0.64907300  | 4.31783000  |
| H | -5.89066000 | -1.56164600 | 3.30932000  |

|   |             |             |             |
|---|-------------|-------------|-------------|
| H | -5.56984600 | 3.08004100  | 4.22935100  |
| C | 2.78660400  | 1.07236900  | 4.62520500  |
| H | 2.18209700  | 1.72098000  | 5.25314900  |
| C | 2.78856300  | 1.25098800  | 3.26744900  |
| H | 2.18104900  | 2.03228700  | 2.82636700  |
| C | 3.55423400  | 0.03389900  | 5.22540600  |
| H | 3.53622500  | -0.09332000 | 6.30444600  |
| C | 4.30233500  | -0.80274000 | 4.44291100  |
| H | 4.88850100  | -1.60375300 | 4.88727000  |
| C | -4.14497900 | -3.73208800 | -0.65095900 |
| H | -3.81318100 | -4.40456100 | -1.43629000 |
| C | -4.86466200 | -4.24890500 | 0.46345300  |
| H | -5.09184800 | -5.31032500 | 0.51257400  |
| C | -5.25944500 | -3.40875900 | 1.46916900  |
| H | -5.80505800 | -3.78975600 | 2.32934200  |
| C | -3.84849600 | -2.39639900 | -0.73613500 |
| H | -3.29918500 | -2.02374200 | -1.59256800 |
| N | -0.48222200 | -1.64452800 | -0.05240000 |
| H | -0.76038600 | -2.33817500 | 0.63865000  |
| S | -0.24714600 | -2.35338000 | -1.56112300 |
| C | 1.62946500  | -2.54598400 | -1.73489100 |
| O | -0.65396300 | -1.44504600 | -2.62289800 |
| O | -0.77107100 | -3.70798100 | -1.42697300 |
| F | 1.84625000  | -3.67345000 | -2.41188600 |
| F | 2.12502100  | -1.52070300 | -2.41630700 |
| F | 2.19835700  | -2.62863500 | -0.53523700 |

NTPA-2R-anion-1

0 imaginary frequency

H = -3240.322970

G = -3240.447065

E(M06-2X-DCM) = -3240.862063

|   |             |             |             |
|---|-------------|-------------|-------------|
| O | 1.21076300  | 0.06398000  | -0.55431800 |
| O | -1.09368400 | 1.03480300  | 0.13621100  |
| P | 0.08144600  | -0.02607000 | 0.67177900  |
| O | 0.58291300  | 0.50443500  | 1.95922000  |
| C | 2.88362500  | 3.78232100  | -1.46135700 |
| C | 1.70137300  | 3.36289800  | -2.06411000 |
| C | 1.17137800  | 2.09511000  | -1.79104000 |
| C | 3.01135000  | 1.65549800  | -0.25456800 |
| C | 3.53589000  | 2.91723800  | -0.58228900 |
| C | -1.80261700 | 0.73581100  | -1.00763400 |
| C | -1.23740500 | 0.96916300  | -2.26372200 |
| C | -1.86316300 | 0.45514200  | -3.40959400 |

|   |             |             |             |
|---|-------------|-------------|-------------|
| C | -3.10936400 | -0.15580600 | -3.32500500 |
| C | -3.73827700 | -0.23094600 | -2.08131900 |
| C | -3.10505600 | 0.20070500  | -0.90563800 |
| H | 4.47102300  | 3.22084900  | -0.11933600 |
| H | -4.73424100 | -0.65836800 | -2.00285200 |
| C | -0.03497500 | 1.81569500  | -2.67925700 |
| C | -0.49040900 | 3.28488000  | -2.98946700 |
| H | -1.11564000 | 3.63554800  | -2.16016100 |
| H | -1.08406200 | 3.35510700  | -3.90691600 |
| H | -1.39208800 | 1.44533500  | -5.28867300 |
| H | -0.90137700 | -0.24621600 | -5.23677700 |
| C | 1.79435800  | 1.27045700  | -0.85293600 |
| H | 3.29849300  | 4.76593900  | -1.67067700 |
| H | -3.59611900 | -0.55768200 | -4.21078900 |
| C | 0.81312000  | 4.10992000  | -3.03489700 |
| H | 0.66148600  | 5.15878000  | -2.75178700 |
| H | 1.24599500  | 4.11587400  | -4.04642500 |
| C | -0.98868900 | 0.66259900  | -4.62928700 |
| C | 0.36012900  | 1.08871100  | -4.00548300 |
| H | 0.94014500  | 0.19587900  | -3.74790300 |
| H | 0.96912500  | 1.71616100  | -4.66591200 |
| C | -3.85836200 | 0.14965000  | 0.38824500  |
| C | -4.20023600 | -1.09128700 | 0.97737100  |
| C | -4.32176100 | 1.35919600  | 0.96589700  |
| C | -3.72238000 | -2.34077300 | 0.46900800  |
| C | -5.04167300 | -1.11909500 | 2.15390900  |
| C | -5.14442100 | 1.31741500  | 2.15398400  |
| C | -4.06711400 | -3.52705500 | 1.06073900  |
| H | -3.03499700 | -2.33733200 | -0.36563100 |
| C | -5.39384000 | -2.38017600 | 2.72850500  |
| C | -5.48834800 | 0.08223600  | 2.70901400  |
| C | -4.92482700 | -3.55098900 | 2.19642300  |
| H | -3.64175700 | -4.45105200 | 0.68277000  |
| H | -6.03331600 | -2.38337100 | 3.60908800  |
| H | -6.11647500 | 0.05598400  | 3.59816500  |
| H | -5.18718200 | -4.50312100 | 2.65198200  |
| C | 3.78152100  | 0.76671200  | 0.67162700  |
| C | 3.93450700  | 1.12520100  | 2.03201600  |
| C | 4.43790200  | -0.37982400 | 0.16152600  |
| C | 3.25090000  | 2.23847900  | 2.61860900  |
| C | 4.79814600  | 0.34242900  | 2.88597600  |
| C | 5.27869500  | -1.16836400 | 1.03286800  |
| C | 3.44362700  | 2.58174100  | 3.93064800  |
| H | 2.54296700  | 2.78980300  | 2.01246800  |

|   |             |             |             |
|---|-------------|-------------|-------------|
| C | 4.97399800  | 0.73690300  | 4.24948100  |
| C | 5.44490200  | -0.78044000 | 2.36460600  |
| C | 4.32553100  | 1.82938500  | 4.75801000  |
| H | 2.89908200  | 3.42196800  | 4.35377700  |
| H | 5.63262400  | 0.13883000  | 4.87609500  |
| H | 6.08994300  | -1.37116200 | 3.01297100  |
| H | 4.46405300  | 2.11527500  | 5.79815100  |
| C | -4.50106700 | 3.80004900  | 0.98623300  |
| H | -4.26074100 | 4.76228300  | 0.54065000  |
| C | -4.03551900 | 2.64733600  | 0.40904500  |
| H | -3.43511000 | 2.70260800  | -0.49154100 |
| C | -5.29470300 | 3.75216600  | 2.16720200  |
| H | -5.65128600 | 4.67598600  | 2.61663300  |
| C | -5.60624800 | 2.54319200  | 2.72814400  |
| H | -6.21587600 | 2.48925800  | 3.62800800  |
| C | 4.98536100  | -1.90147200 | -1.67099800 |
| H | 4.87208500  | -2.19788400 | -2.71063200 |
| C | 5.80305000  | -2.68079300 | -0.80485200 |
| H | 6.30773800  | -3.56368500 | -1.18951300 |
| C | 5.94376700  | -2.31964900 | 0.50718800  |
| H | 6.56308900  | -2.90674300 | 1.18214800  |
| C | 4.33004800  | -0.79266900 | -1.20488500 |
| H | 3.70718900  | -0.21504700 | -1.87751700 |
| N | -0.58008000 | -1.48195500 | 0.47290100  |
| S | 0.12745800  | -2.87416700 | 0.20499000  |
| O | -0.74929400 | -3.98008500 | 0.62017100  |
| O | 1.55925700  | -2.95191600 | 0.53146100  |
| C | 0.08125800  | -3.03237700 | -1.66674800 |
| F | -1.16300600 | -2.82560900 | -2.14255000 |
| F | 0.45647700  | -4.27266200 | -2.02955900 |
| F | 0.90333600  | -2.16253900 | -2.27853400 |

NTPA-2R-anion-2

0 imaginary frequency

H = -3240.321172

G = -3240.445393

E(M06-2X-DCM) = -3240.859810

|   |             |             |             |
|---|-------------|-------------|-------------|
| O | 1.09463000  | 0.53187300  | -0.60821800 |
| O | -1.26343100 | 0.84898200  | 0.42193000  |
| P | -0.01648000 | -0.26152700 | 0.37135300  |
| O | 0.47975600  | -0.43045700 | 1.75575800  |
| C | 2.49256300  | 4.25598600  | 0.68852100  |
| C | 1.33647300  | 4.15143700  | -0.07838800 |
| C | 0.90516500  | 2.90662200  | -0.55595400 |



|   |              |              |              |
|---|--------------|--------------|--------------|
| C | 2. 79309400  | 1. 83019600  | 0. 54081300  |
| C | 3. 21994800  | 3. 09917200  | 0. 96747700  |
| C | -1. 95544000 | 1. 16031000  | -0. 72837500 |
| C | -1. 41256600 | 2. 06223800  | -1. 64654700 |
| C | -2. 00573400 | 2. 20828600  | -2. 90857000 |
| C | -3. 20442500 | 1. 56856800  | -3. 20700200 |
| C | -3. 82497700 | 0. 80822500  | -2. 21447600 |
| C | -3. 22427200 | 0. 58964000  | -0. 96447600 |
| H | 4. 13920700  | 3. 16427200  | 1. 54344700  |
| H | -4. 79249700 | 0. 35256400  | -2. 40694400 |
| C | -0. 28585900 | 3. 07968900  | -1. 49036200 |
| C | -0. 85655900 | 4. 44013700  | -0. 95690800 |
| H | -1. 49320800 | 4. 23210600  | -0. 08919000 |
| H | -1. 46787700 | 4. 95925100  | -1. 70266200 |
| H | -1. 64170300 | 4. 08870600  | -3. 93730500 |
| H | -1. 00301800 | 2. 68499400  | -4. 78779700 |
| C | 1. 59417400  | 1. 74515900  | -0. 19837400 |
| H | 2. 83007600  | 5. 22008600  | 1. 06262200  |
| H | -3. 66640800 | 1. 67412700  | -4. 18606300 |
| C | 0. 38097700  | 5. 24414300  | -0. 50581200 |
| H | 0. 15637900  | 5. 95122600  | 0. 30213700  |
| H | 0. 79682500  | 5. 83536200  | -1. 33531700 |
| C | -1. 16362800 | 3. 10907100  | -3. 78913600 |
| C | 0. 14972500  | 3. 24007600  | -2. 98333200 |
| H | 0. 82462200  | 2. 41546400  | -3. 23856500 |
| H | 0. 68103000  | 4. 18062200  | -3. 16724000 |
| C | -3. 99391600 | -0. 14264400 | 0. 09250100  |
| C | -4. 28180300 | -1. 52156000 | -0. 04197400 |
| C | -4. 53817600 | 0. 59134600  | 1. 17769700  |
| C | -3. 71503500 | -2. 32524700 | -1. 08140600 |
| C | -5. 15729200 | -2. 16878100 | 0. 91090000  |
| C | -5. 38877300 | -0. 07472800 | 2. 13864300  |
| C | -4. 01374700 | -3. 65817500 | -1. 19079600 |
| H | -2. 98902800 | -1. 88402300 | -1. 75173000 |
| C | -5. 46061300 | -3. 55624800 | 0. 74657600  |
| C | -5. 68340200 | -1. 43040400 | 1. 97320300  |
| C | -4. 91124500 | -4. 27976800 | -0. 27746400 |
| H | -3. 51912600 | -4. 24841300 | -1. 95507600 |
| H | -6. 12742700 | -4. 02561100 | 1. 46724700  |
| H | -6. 33563800 | -1. 92372400 | 2. 69221700  |
| H | -5. 13678100 | -5. 33855000 | -0. 38191600 |
| C | 3. 65993100  | 0. 64762900  | 0. 84446600  |
| C | 3. 80829300  | 0. 19837700  | 2. 17787600  |
| C | 4. 41904700  | 0. 05337400  | -0. 19259700 |

|   |             |             |             |
|---|-------------|-------------|-------------|
| C | 3.03194000  | 0.72591000  | 3.25935100  |
| C | 4.76565200  | -0.84074000 | 2.48128700  |
| C | 5.35071100  | -1.00623000 | 0.11976900  |
| C | 3.22144100  | 0.29605600  | 4.54592600  |
| H | 2.25707000  | 1.44832000  | 3.03656100  |
| C | 4.93348200  | -1.25909600 | 3.83860400  |
| C | 5.50822200  | -1.41443900 | 1.44650200  |
| C | 4.19216400  | -0.70225800 | 4.84495700  |
| H | 2.60645100  | 0.70076600  | 5.34546500  |
| H | 5.66168300  | -2.03958900 | 4.04947900  |
| H | 6.22178100  | -2.20336600 | 1.67831700  |
| H | 4.32522700  | -1.03346500 | 5.87221900  |
| C | -4.85150200 | 2.67697600  | 2.42032700  |
| H | -4.65308100 | 3.73991900  | 2.53438500  |
| C | -4.30967700 | 1.99314700  | 1.36317700  |
| H | -3.69197800 | 2.51899300  | 0.64453900  |
| C | -5.67047900 | 2.00962700  | 3.37455500  |
| H | -6.08765900 | 2.56478100  | 4.21141100  |
| C | -5.93046200 | 0.67361300  | 3.23042600  |
| H | -6.55922900 | 0.14980700  | 3.94775400  |
| C | 5.05980800  | -0.13513300 | -2.54432900 |
| H | 4.95151600  | 0.18996600  | -3.57597200 |
| C | 5.96656100  | -1.18757300 | -2.23223900 |
| H | 6.54190100  | -1.65719100 | -3.02637400 |
| C | 6.10662300  | -1.60445500 | -0.93624700 |
| H | 6.79525600  | -2.40773300 | -0.68248700 |
| C | 4.31813600  | 0.46401000  | -1.56026100 |
| H | 3.63058600  | 1.26200000  | -1.81538800 |
| N | -0.53752300 | -1.40497800 | -0.62916700 |
| S | -0.07966100 | -2.90732300 | -0.84298000 |
| O | -0.81445500 | -3.47412000 | -1.98677400 |
| O | 0.04816000  | -3.72312700 | 0.37290300  |
| C | 1.67758400  | -2.78833400 | -1.47842200 |
| F | 1.76438600  | -1.96626200 | -2.53450300 |
| F | 2.11281300  | -4.00331300 | -1.85820500 |
| F | 2.49606500  | -2.33278300 | -0.51747600 |

NTPA-2R-anion-3

0 imaginary frequency

H = -3240.320042

G = -3240.442978

E(M06-2X-DCM) = -3240.859289

|   |             |            |             |
|---|-------------|------------|-------------|
| O | -1.21232700 | 0.94445900 | 0.19761000  |
| O | 1.14027300  | 0.13417300 | -0.54768500 |

|   |             |             |             |
|---|-------------|-------------|-------------|
| P | -0.00034200 | -0.11895000 | 0.64779600  |
| O | 0.44588100  | 0.33149700  | 1.98468800  |
| C | -3.18715400 | 0.24906900  | -3.41825000 |
| C | -1.93665800 | 0.85612000  | -3.40238600 |
| C | -1.32581700 | 1.20655600  | -2.19044100 |
| C | -3.20512600 | 0.25438800  | -0.97403600 |
| C | -3.82977500 | 0.00221800  | -2.20552600 |
| C | 1.69397900  | 1.38394000  | -0.69895500 |
| C | 1.06180300  | 2.30126900  | -1.54076600 |
| C | 1.56622400  | 3.60517800  | -1.64881900 |
| C | 2.72776200  | 3.97815400  | -0.98037700 |
| C | 3.38821100  | 3.03056200  | -0.19877900 |
| C | 2.89103000  | 1.72722300  | -0.03534300 |
| H | -4.82813800 | -0.42679600 | -2.19894800 |
| H | 4.30683300  | 3.29861800  | 0.31633900  |
| C | -0.12910400 | 2.11236700  | -2.47421700 |
| C | 0.29395400  | 1.56712900  | -3.87621700 |
| H | 0.90475900  | 2.28147200  | -4.44005700 |
| H | 0.88163100  | 0.65463200  | -3.72707800 |
| H | 0.50206000  | 5.45256300  | -2.12830600 |
| H | 1.11953600  | 4.58311400  | -3.53152400 |
| C | -1.90160500 | 0.79603400  | -0.98652700 |
| H | -3.66455000 | -0.02278700 | -4.35691700 |
| H | 3.11860800  | 4.98999600  | -1.06294000 |
| C | -1.04203000 | 1.21511500  | -4.57094100 |
| H | -1.43668700 | 2.06963300  | -5.14067300 |
| H | -0.93825200 | 0.38430000  | -5.27873400 |
| C | 0.67538900  | 4.44825600  | -2.53402400 |
| C | -0.61076800 | 3.60048300  | -2.60465900 |
| H | -1.19859300 | 3.77170500  | -3.51225800 |
| H | -1.24966000 | 3.83376900  | -1.74492500 |
| C | 3.67843400  | 0.76223700  | 0.79802800  |
| C | 4.44539600  | -0.24566800 | 0.16450200  |
| C | 3.74689200  | 0.92741500  | 2.20163000  |
| C | 4.44177100  | -0.44469600 | -1.25284600 |
| C | 5.29504600  | -1.10424400 | 0.95822900  |
| C | 4.62173700  | 0.08078000  | 2.98061800  |
| C | 5.19866300  | -1.42427700 | -1.83998000 |
| H | 3.81311600  | 0.18999500  | -1.86619200 |
| C | 6.06579700  | -2.11740900 | 0.30710100  |
| C | 5.36603100  | -0.91293200 | 2.34043800  |
| C | 6.02137800  | -2.27743300 | -1.05147400 |
| H | 5.16323000  | -1.56032700 | -2.91771400 |
| H | 6.69081800  | -2.76136900 | 0.92243600  |

|   |             |             |             |
|---|-------------|-------------|-------------|
| H | 6.01827900  | -1.55304000 | 2.93234100  |
| H | 6.60918100  | -3.05522100 | -1.53293400 |
| C | -3.95984400 | 0.00163700  | 0.29447700  |
| C | -4.39640800 | 1.09951200  | 1.07867600  |
| C | -4.31831400 | -1.31704500 | 0.66577700  |
| C | -4.10043100 | 2.45987600  | 0.74324400  |
| C | -5.20064100 | 0.86524900  | 2.25690500  |
| C | -5.13585700 | -1.53626500 | 1.83877700  |
| C | -4.54090600 | 3.50289100  | 1.51552600  |
| H | -3.51420200 | 2.65940400  | -0.14615200 |
| C | -5.63536300 | 1.98075700  | 3.03938700  |
| C | -5.55218400 | -0.44246700 | 2.60120500  |
| C | -5.31580100 | 3.26374700  | 2.68572400  |
| H | -4.29475700 | 4.52416400  | 1.23520700  |
| H | -6.23102200 | 1.78173800  | 3.92815300  |
| H | -6.16246400 | -0.61282400 | 3.48683800  |
| H | -5.65190200 | 4.10177600  | 3.29185300  |
| C | 3.08673300  | 2.06988500  | 4.25615600  |
| H | 2.47481200  | 2.81081300  | 4.76389300  |
| C | 2.97183100  | 1.90758100  | 2.90114500  |
| H | 2.25818700  | 2.49897000  | 2.34209700  |
| C | 3.97421400  | 1.25437300  | 5.01496400  |
| H | 4.04833800  | 1.39548300  | 6.09078200  |
| C | 4.71087100  | 0.28288200  | 4.39381700  |
| H | 5.37747200  | -0.36104200 | 4.96396700  |
| C | -4.23041600 | -3.73255000 | 0.32104900  |
| H | -3.83718700 | -4.58241600 | -0.22778300 |
| C | -5.05910900 | -3.94114100 | 1.45923600  |
| H | -5.32779900 | -4.95390800 | 1.75083000  |
| C | -5.49575300 | -2.87313000 | 2.19612400  |
| H | -6.11576500 | -3.02001300 | 3.07841300  |
| C | -3.87907800 | -2.46615200 | -0.06577500 |
| H | -3.22755700 | -2.32805000 | -0.91974300 |
| N | -0.43636900 | -1.64825800 | 0.44411500  |
| S | -0.37135300 | -2.66489000 | -0.76564900 |
| C | 1.46265700  | -2.95614200 | -1.12265700 |
| O | -0.88360700 | -2.15982400 | -2.05656500 |
| O | -0.84064600 | -3.98643900 | -0.32412300 |
| F | 1.91161700  | -2.12313500 | -2.07417500 |
| F | 2.21183300  | -2.79735800 | -0.02391000 |
| F | 1.63326900  | -4.21316900 | -1.57030000 |

NTPA-2R-anion-4

0 imaginary frequency

H = -3240.317923

G = -3240.442752

E(M06-2X-DCM) = -3240.853867

|   |             |             |             |
|---|-------------|-------------|-------------|
| O | 1.36590500  | -0.09359400 | -0.64910600 |
| O | -0.92807100 | 0.96914400  | -0.02939400 |
| P | 0.17893000  | -0.16506500 | 0.51858900  |
| O | 0.62393300  | 0.30847600  | 1.84806600  |
| C | 3.02868900  | 3.48445600  | -2.01032000 |
| C | 1.85805100  | 2.98185700  | -2.57039600 |
| C | 1.30869200  | 1.77136900  | -2.12536800 |
| C | 3.11478000  | 1.56402900  | -0.49804900 |
| C | 3.65061100  | 2.76568300  | -0.98990800 |
| C | -1.70158800 | 0.66466200  | -1.12867700 |
| C | -1.15380200 | 0.69472000  | -2.41115600 |
| C | -1.84823900 | 0.09184700  | -3.47008500 |
| C | -3.15047300 | -0.36347600 | -3.29454300 |
| C | -3.76121900 | -0.19586900 | -2.04925300 |
| C | -3.05451200 | 0.30554300  | -0.94577500 |
| H | 4.57024200  | 3.13859700  | -0.54685400 |
| H | -4.79839000 | -0.48947200 | -1.90976500 |
| C | 0.09049100  | 1.39063600  | -2.96134700 |
| C | -0.31919300 | 2.80910000  | -3.50162700 |
| H | -0.93705300 | 3.30330600  | -2.74261100 |
| H | -0.90813000 | 2.75103300  | -4.42247300 |
| H | -1.31471200 | 0.69957100  | -5.49366200 |
| H | -0.95322900 | -0.98871500 | -5.13081600 |
| C | 1.91944300  | 1.08580700  | -1.07280300 |
| H | 3.45375000  | 4.42369700  | -2.35756200 |
| H | -3.69359700 | -0.83223200 | -4.11195800 |
| C | 1.00389000  | 3.58202300  | -3.66392100 |
| H | 0.87941500  | 4.66712100  | -3.56175200 |
| H | 1.44902400  | 3.40636000  | -4.65468700 |
| C | -0.96742300 | 0.01966400  | -4.70160600 |
| C | 0.41967400  | 0.43955400  | -4.15471700 |
| H | 0.93544300  | -0.44232700 | -3.76110800 |
| H | 1.05877400  | 0.91361600  | -4.90867700 |
| C | -3.76063800 | 0.51728400  | 0.35941900  |
| C | -4.18424600 | -0.58073100 | 1.14431300  |
| C | -4.07968300 | 1.83772900  | 0.76698700  |
| C | -3.85945600 | -1.93027600 | 0.80119500  |
| C | -4.95434500 | -0.35516500 | 2.34729600  |
| C | -4.83481200 | 2.05201400  | 1.98120700  |
| C | -4.28177600 | -2.98172100 | 1.57116600  |
| H | -3.23721200 | -2.10840700 | -0.06395600 |

|   |             |             |             |
|---|-------------|-------------|-------------|
| C | -5.38579800 | -1.48107800 | 3.11643300  |
| C | -5.25655700 | 0.95243300  | 2.73369400  |
| C | -5.06421800 | -2.75737000 | 2.73939300  |
| H | -3.98901800 | -3.99090000 | 1.29893300  |
| H | -5.96924900 | -1.29602900 | 4.01620000  |
| H | -5.83136700 | 1.11987800  | 3.64320900  |
| H | -5.39104100 | -3.60384300 | 3.33902100  |
| C | 3.84602600  | 0.83720600  | 0.58798500  |
| C | 3.90096400  | 1.38969400  | 1.88953500  |
| C | 4.55724100  | -0.34982200 | 0.29001700  |
| C | 3.15943300  | 2.55565900  | 2.26534700  |
| C | 4.72034100  | 0.76132000  | 2.90031300  |
| C | 5.35801100  | -0.97935700 | 1.31529000  |
| C | 3.25187700  | 3.08428300  | 3.52572600  |
| H | 2.49384500  | 3.00416100  | 1.53776500  |
| C | 4.79211700  | 1.34759600  | 4.20283500  |
| C | 5.42655800  | -0.40212700 | 2.58585000  |
| C | 4.08683700  | 2.47986500  | 4.50839200  |
| H | 2.66542700  | 3.96129600  | 3.78740000  |
| H | 5.41806500  | 0.86351600  | 4.94986600  |
| H | 6.04049300  | -0.87442300 | 3.35109300  |
| H | 4.14619400  | 2.91177600  | 5.50472500  |
| C | -4.03052900 | 4.26014300  | 0.42479900  |
| H | -3.72768100 | 5.11799900  | -0.17055500 |
| C | -3.70588800 | 2.99466100  | 0.01028900  |
| H | -3.15287800 | 2.85486300  | -0.91134200 |
| C | -4.75919900 | 4.46479900  | 1.63058200  |
| H | -5.00411700 | 5.47536600  | 1.94887500  |
| C | -5.14943700 | 3.38866200  | 2.38102700  |
| H | -5.71047600 | 3.52893100  | 3.30285700  |
| C | 5.24039000  | -2.10610600 | -1.26469100 |
| H | 5.18874400  | -2.55805500 | -2.25150100 |
| C | 6.02356400  | -2.72459100 | -0.24967600 |
| H | 6.56840300  | -3.63885200 | -0.47209200 |
| C | 6.07942100  | -2.17319800 | 1.00133400  |
| H | 6.67058000  | -2.63745100 | 1.78811400  |
| C | 4.53729100  | -0.95994100 | -1.00455600 |
| H | 3.93815600  | -0.50799400 | -1.78611600 |
| N | -0.45779300 | -1.62704900 | 0.26902400  |
| S | 0.24521300  | -2.80617500 | -0.53996100 |
| O | 1.53138600  | -3.26814900 | 0.00817800  |
| O | 0.13627700  | -2.70415600 | -2.00998200 |
| C | -0.93357300 | -4.19476300 | -0.12266300 |
| F | -1.15721300 | -4.30478500 | 1.19253400  |

|   |             |             |             |
|---|-------------|-------------|-------------|
| F | -0.40171800 | -5.35150800 | -0.55513200 |
| F | -2.12588900 | -4.04751500 | -0.73862600 |

INT-1

0 imaginary frequencies

H = -3546.208826

G = -3546.348273

E(M06-2X-DCM) = -3546.693470

|   |             |             |             |
|---|-------------|-------------|-------------|
| O | -2.27307500 | 3.68711400  | -1.27637400 |
| O | -3.81353300 | 2.11985200  | 0.06436700  |
| P | -2.29564100 | 2.28074900  | -0.47464800 |
| O | -2.02420400 | 1.12003700  | -1.40309900 |
| C | -4.04605000 | -2.12619100 | -1.72050600 |
| C | -4.50557400 | -1.47309300 | -0.37490100 |
| H | -5.56749400 | -1.22990100 | -0.49868900 |
| H | -3.99415900 | -0.51273800 | -0.25909900 |
| C | -3.03807700 | -2.27642300 | 1.61546400  |
| C | -2.37733900 | -1.06196600 | 1.87113000  |
| C | -2.45277300 | -3.46245600 | 2.09638800  |
| C | -1.17958000 | -1.03057100 | 2.58835200  |
| H | -2.80943500 | -0.12361700 | 1.53764700  |
| C | -1.25150300 | -3.43540700 | 2.80520300  |
| H | -2.94318600 | -4.41232500 | 1.89835200  |
| C | -0.60980700 | -2.21946200 | 3.05342500  |
| H | -0.69367400 | -0.07628000 | 2.77308300  |
| H | -0.81561500 | -4.36555000 | 3.16125500  |
| H | 0.32972600  | -2.19511800 | 3.59965100  |
| C | -4.34000800 | -2.31271900 | 0.88394800  |
| C | -2.57932900 | -2.61260800 | -1.67600500 |
| H | -2.48125800 | -3.34892100 | -0.86972600 |
| H | -2.35453100 | -3.11065300 | -2.62919000 |
| N | -1.59857000 | -1.54192800 | -1.46003400 |
| C | -0.29677800 | -1.69812300 | -1.30265800 |
| N | 0.50697900  | -0.64510200 | -1.12130600 |
| C | 1.89569700  | -0.75608100 | -0.77098200 |
| C | 2.24963100  | -1.03501900 | 0.55078300  |
| C | 2.87140700  | -0.54297300 | -1.74202300 |
| C | 3.59727200  | -1.12306800 | 0.89121900  |
| C | 4.21941400  | -0.62179000 | -1.38522600 |
| H | 2.58064400  | -0.31569600 | -2.76137600 |
| C | 4.58591500  | -0.91485000 | -0.07250100 |
| H | 5.63358400  | -0.97830000 | 0.19881100  |
| C | 5.28126500  | -0.33584800 | -2.41705700 |
| C | 3.99983100  | -1.50359500 | 2.29413200  |

|   |             |             |             |
|---|-------------|-------------|-------------|
| F | 6.42698700  | -0.99726100 | -2.14704800 |
| F | 4.87875200  | -0.70129500 | -3.65428200 |
| F | 5.58198500  | 0.97833600  | -2.46919400 |
| F | 5.10024200  | -0.83360700 | 2.69258900  |
| F | 3.01922100  | -1.26077500 | 3.18631400  |
| F | 4.29263300  | -2.82368600 | 2.37164900  |
| S | 0.51785600  | -3.27538100 | -1.35208500 |
| H | 1.47674100  | -1.16575100 | 1.29874100  |
| H | 0.10577200  | 0.30442700  | -1.06339200 |
| H | -1.92546900 | -0.55174100 | -1.39539400 |
| C | -5.35306900 | -3.06216200 | 1.34759900  |
| H | -6.31278300 | -3.09941800 | 0.83846700  |
| H | -0.60120800 | -4.00172800 | -1.51842100 |
| H | -5.26656200 | -3.63831700 | 2.26453300  |
| N | -1.41724800 | 2.48474900  | 0.86800900  |
| S | 0.16864600  | 2.48210000  | 0.90514700  |
| O | 0.66755500  | 1.88758400  | 2.15258000  |
| O | 0.80055400  | 2.03536500  | -0.36528600 |
| C | 0.63762600  | 4.28658000  | 1.02687000  |
| F | 0.08845000  | 4.83343600  | 2.11606700  |
| F | 1.96852100  | 4.39525800  | 1.11088800  |
| F | 0.21534700  | 4.95265500  | -0.05289300 |
| C | -4.24279700 | -1.10329100 | -2.85809300 |
| H | -3.93353400 | -1.52680300 | -3.82203000 |
| H | -3.68071700 | -0.18018300 | -2.68817700 |
| H | -5.30239200 | -0.83525900 | -2.93929100 |
| C | -4.89647300 | -3.37613800 | -2.02369500 |
| H | -4.61023900 | -3.82508700 | -2.98269300 |
| H | -5.95548900 | -3.10376700 | -2.09054100 |
| H | -4.79793300 | -4.13683300 | -1.24261300 |
| C | -4.33200600 | 3.04355700  | 1.03897400  |
| H | -3.73010900 | 3.00901300  | 1.95026700  |
| H | -5.35574200 | 2.72609500  | 1.24641000  |
| H | -4.33483300 | 4.06245000  | 0.63828700  |
| C | -2.80932400 | 3.75188400  | -2.60705600 |
| H | -2.62177200 | 4.76650000  | -2.96325700 |
| H | -3.88799200 | 3.55847600  | -2.60137500 |
| H | -2.31094300 | 3.02795900  | -3.25722100 |

INT-1'

0 imaginary frequencies

H = -3546.212781

G = -3546.353592

E(M06-2X-DCM) = -3546.692934



|   |             |             |             |
|---|-------------|-------------|-------------|
| O | 0.90783500  | -2.24937800 | -0.00524300 |
| O | 2.66703700  | -2.20868400 | -1.88065800 |
| P | 1.88856000  | -1.29971100 | -0.82878700 |
| O | 1.13186300  | -0.12685400 | -1.33712400 |
| N | 3.16469200  | -0.76195900 | 0.15724200  |
| S | 4.53446500  | -1.54117900 | 0.72985000  |
| C | 5.82935300  | -1.05762600 | -0.53956100 |
| F | 7.00604300  | -1.52065500 | -0.12703500 |
| F | 5.53059000  | -1.57447800 | -1.72699000 |
| F | 5.87174000  | 0.27274800  | -0.62643400 |
| C | 1.70517500  | 4.17266500  | -0.71808100 |
| C | 1.88336400  | 4.08236400  | 0.83626900  |
| H | 2.88477900  | 4.47539400  | 1.04635500  |
| H | 1.18600200  | 4.80084400  | 1.28124500  |
| C | 0.45295800  | 2.26522700  | 2.07308700  |
| C | -0.56940100 | 3.15394300  | 2.44659200  |
| C | 0.20699800  | 0.88766700  | 2.23624200  |
| C | -1.77457400 | 2.68878300  | 2.97267700  |
| H | -0.42902400 | 4.22453700  | 2.34421500  |
| C | -0.99716600 | 0.41977300  | 2.75597000  |
| H | 0.96282000  | 0.16800700  | 1.93795300  |
| C | -1.99575400 | 1.32171200  | 3.13012700  |
| H | -2.54574500 | 3.40168400  | 3.24952300  |
| H | -1.16727000 | -0.64996000 | 2.84538300  |
| H | -2.94053200 | 0.96083500  | 3.52626700  |
| C | 1.77246500  | 2.75135400  | 1.57326900  |
| C | 0.24844200  | 3.96087300  | -1.19641200 |
| H | 0.17282400  | 4.29651900  | -2.24228100 |
| H | -0.43280500 | 4.59348800  | -0.62145700 |
| N | -0.22469200 | 2.59159200  | -1.09095800 |
| C | -1.53487100 | 2.23129300  | -1.05464300 |
| N | -1.67254500 | 0.85511000  | -1.04364600 |
| C | -2.75896200 | 0.03321000  | -0.71837800 |
| C | -4.11226100 | 0.35377300  | -0.91515000 |
| C | -2.43448100 | -1.22594900 | -0.19092500 |
| C | -5.09559900 | -0.57124800 | -0.56209600 |
| C | -3.43079000 | -2.13478300 | 0.15417200  |
| H | -1.39330500 | -1.48585400 | -0.02977100 |
| C | -4.77615100 | -1.81961600 | -0.02351300 |
| H | -5.55323200 | -2.52472200 | 0.24301100  |
| C | -3.00179200 | -3.44649400 | 0.74695300  |
| C | -6.54597000 | -0.19059800 | -0.71860500 |
| F | -2.20504800 | -4.14882900 | -0.10405800 |
| F | -4.03754700 | -4.24091000 | 1.07124100  |

|   |             |             |             |
|---|-------------|-------------|-------------|
| F | -2.26054200 | -3.26626300 | 1.87384700  |
| F | -7.32523300 | -1.27492400 | -0.94071600 |
| F | -6.73873400 | 0.66356500  | -1.74444400 |
| F | -7.02404800 | 0.41173600  | 0.39468300  |
| S | -2.79638900 | 3.34530700  | -1.02816000 |
| C | 2.05844800  | 5.62843000  | -1.10174700 |
| H | 3.08162200  | 5.87560400  | -0.79710800 |
| H | 1.98650800  | 5.77727400  | -2.18507000 |
| H | 1.38161000  | 6.34414700  | -0.61984400 |
| C | 2.68450800  | 3.23364500  | -1.44674700 |
| H | 2.58524200  | 3.34095000  | -2.53366700 |
| H | 3.72015100  | 3.48020800  | -1.18278600 |
| H | 2.53032000  | 2.17877700  | -1.20072500 |
| H | -4.38164400 | 1.31320800  | -1.33274900 |
| C | 2.90261300  | 2.07515900  | 1.87171500  |
| H | -0.78691500 | 0.35199700  | -1.03945100 |
| H | 3.87784800  | 2.44160800  | 1.56102500  |
| H | 2.90453500  | 1.20434700  | 2.52152800  |
| O | 4.34101600  | -2.98013100 | 0.62240900  |
| H | 0.46067600  | 1.85139900  | -1.19951500 |
| O | 4.91868500  | -0.87409100 | 1.96555000  |
| H | 3.04779500  | 0.18902000  | 0.53019600  |
| C | 1.23547400  | -3.53340600 | 0.58497100  |
| H | 1.79634500  | -3.38095000 | 1.50848400  |
| H | 0.27475300  | -4.00436700 | 0.78835000  |
| H | 1.82690000  | -4.13640200 | -0.10655000 |
| C | 1.95680200  | -2.76593700 | -3.01486700 |
| H | 1.52700800  | -1.96181900 | -3.61662000 |
| H | 2.70320400  | -3.31263100 | -3.59020200 |
| H | 1.17028300  | -3.44681000 | -2.67768300 |

INT-1''

0 imaginary frequencies

H = -3546.197632

G = -3546.336646

E(M06-2X-DCM) = -3546.68586

|   |             |             |             |
|---|-------------|-------------|-------------|
| O | -4.93135700 | 2.24783900  | -0.37640400 |
| O | -5.07343300 | 1.29263700  | 2.02579800  |
| P | -4.21823300 | 1.30143900  | 0.68167300  |
| O | -4.43251400 | -0.15210300 | 0.08589000  |
| N | -2.76257700 | 1.80178400  | 1.03151500  |
| S | -1.40915700 | 1.76760400  | 0.17158400  |
| C | -1.45145900 | 3.36126700  | -0.81020200 |
| F | -0.30447500 | 3.47840900  | -1.48440300 |

|   |             |             |             |
|---|-------------|-------------|-------------|
| F | -2.47052500 | 3.33919300  | -1.67366400 |
| F | -1.59140600 | 4.40045000  | 0.01105200  |
| C | -2.36858100 | -3.77164000 | -1.58365900 |
| C | -2.58181700 | -4.13716200 | -0.07273000 |
| H | -3.61648000 | -4.48928900 | 0.01072700  |
| H | -1.95327300 | -5.01077000 | 0.13711300  |
| C | -1.00169100 | -2.81174600 | 1.53259100  |
| C | -0.00148100 | -3.79912400 | 1.56821900  |
| C | -0.67945600 | -1.53293700 | 2.02346900  |
| C | 1.26690500  | -3.51700400 | 2.07377200  |
| H | -0.20783700 | -4.80243400 | 1.21051800  |
| C | 0.59150100  | -1.24566000 | 2.51382900  |
| H | -1.41972600 | -0.74010900 | 1.99045600  |
| C | 1.57383900  | -2.23847700 | 2.54182600  |
| H | 2.02200800  | -4.29767000 | 2.08469900  |
| H | 0.81692300  | -0.23607100 | 2.84330900  |
| H | 2.57592500  | -2.00956200 | 2.89354900  |
| C | -2.37221100 | -3.11070900 | 1.03201600  |
| C | -0.89086200 | -3.54126200 | -1.98061500 |
| H | -0.81363200 | -3.59528400 | -3.07631500 |
| H | -0.26766500 | -4.35327200 | -1.59380000 |
| N | -0.32119100 | -2.28355600 | -1.52439100 |
| C | 1.01056300  | -2.01346900 | -1.54104700 |
| N | 1.27950600  | -0.71187000 | -1.17640900 |
| C | 2.48700800  | -0.11150700 | -0.78741400 |
| C | 3.53648600  | -0.80560600 | -0.17410100 |
| C | 2.58955900  | 1.27896200  | -0.94483300 |
| C | 4.65360200  | -0.10547500 | 0.28291400  |
| C | 3.71359200  | 1.96059800  | -0.48803900 |
| H | 1.77901500  | 1.82844900  | -1.40997700 |
| C | 4.75975300  | 1.27600800  | 0.13305400  |
| H | 5.62911200  | 1.80775600  | 0.49924100  |
| C | 3.82768300  | 3.44384000  | -0.71658000 |
| C | 5.70449100  | -0.87305700 | 1.03894100  |
| F | 2.61727600  | 4.03644500  | -0.82211900 |
| F | 4.50168100  | 3.72372200  | -1.85741800 |
| F | 4.49372600  | 4.05591200  | 0.28823600  |
| F | 6.83798000  | -0.16045900 | 1.21225700  |
| F | 6.03647400  | -2.02395000 | 0.41862100  |
| F | 5.26239800  | -1.21712100 | 2.27906600  |
| S | 2.16517200  | -3.14686800 | -2.01112300 |
| H | 3.47070200  | -1.87672300 | -0.04523200 |
| C | -3.45413400 | -2.55193400 | 1.62512500  |
| H | 0.47095900  | -0.09775600 | -1.10405700 |

|   |             |             |             |
|---|-------------|-------------|-------------|
| H | -4.46271900 | -2.83657600 | 1.33220600  |
| H | -3.36266200 | -1.93236500 | 2.51383000  |
| O | -1.40438200 | 0.69972400  | -0.85872300 |
| H | -0.95116400 | -1.53547500 | -1.26040700 |
| O | -0.25732700 | 1.88207300  | 1.05999100  |
| H | -3.93906900 | -0.88825000 | 0.53395200  |
| C | -2.81828600 | -5.02090400 | -2.37760600 |
| H | -3.86168300 | -5.27159900 | -2.15511800 |
| H | -2.20218600 | -5.89399600 | -2.13153400 |
| H | -2.73786100 | -4.84806900 | -3.45639000 |
| C | -3.25735300 | -2.58939700 | -2.00955200 |
| H | -4.31213800 | -2.80132400 | -1.79557500 |
| H | -3.16678600 | -2.41395500 | -3.08802300 |
| H | -3.00845100 | -1.65105900 | -1.50585800 |
| C | -6.24546300 | 1.95281600  | -0.91102200 |
| H | -6.20800800 | 1.03419700  | -1.49977800 |
| H | -6.50162600 | 2.80088100  | -1.54556600 |
| H | -6.97229200 | 1.85586200  | -0.09997600 |
| C | -4.91952200 | 2.33310700  | 3.02454100  |
| H | -3.87297200 | 2.40770100  | 3.32434600  |
| H | -5.54290800 | 2.02674500  | 3.86438500  |
| H | -5.26845800 | 3.29023900  | 2.62734400  |

TS-E-1

1 imaginary frequencies

H = -3546.193030

G = -3546.327946

E(M06-2X-DCM) = -3546.664627

|   |             |             |             |
|---|-------------|-------------|-------------|
| O | -3.73926100 | 2.77126700  | -0.72825000 |
| O | -4.52349800 | 1.39153900  | 1.29520800  |
| P | -3.28388200 | 1.58500800  | 0.27957300  |
| O | -3.08694000 | 0.27716500  | -0.44329900 |
| C | -3.43103100 | -3.22227800 | -1.46941900 |
| C | -3.00446000 | -3.34064500 | 0.03196900  |
| H | -3.66057200 | -4.09560400 | 0.49501900  |
| H | -3.26144600 | -2.40249700 | 0.52615500  |
| C | -0.96735200 | -3.03281300 | 1.56273700  |
| C | -1.20633600 | -1.66206600 | 1.81339900  |
| C | -0.04804300 | -3.71203000 | 2.39646700  |
| C | -0.51631600 | -0.98974100 | 2.81880300  |
| H | -1.88061900 | -1.09395600 | 1.18142200  |
| C | 0.61339800  | -3.04489100 | 3.42097500  |
| H | 0.11609300  | -4.77682400 | 2.26461600  |
| C | 0.39245400  | -1.67930700 | 3.62504000  |

|   |             |             |             |
|---|-------------|-------------|-------------|
| H | -0.66853400 | 0.07740700  | 2.94436200  |
| H | 1.30752100  | -3.58709300 | 4.05621200  |
| H | 0.93001600  | -1.15302800 | 4.40850400  |
| C | -1.59838400 | -3.72597500 | 0.43103100  |
| C | -2.33073300 | -2.56249800 | -2.36073800 |
| H | -1.68084200 | -3.32128300 | -2.79539100 |
| H | -2.83002500 | -2.05271200 | -3.19490600 |
| N | -1.47237200 | -1.58860600 | -1.68628600 |
| C | -0.13115600 | -1.58656300 | -1.68835000 |
| N | 0.48354300  | -0.46013300 | -1.28309200 |
| C | 1.85969500  | -0.30520300 | -0.94276200 |
| C | 2.47902900  | -1.13668000 | -0.00825900 |
| C | 2.55856400  | 0.76832100  | -1.49844500 |
| C | 3.81185400  | -0.91385900 | 0.33480900  |
| C | 3.88792500  | 0.98727700  | -1.13761500 |
| H | 2.06165600  | 1.42940300  | -2.19857500 |
| C | 4.52527200  | 0.14405000  | -0.22803500 |
| H | 5.55955400  | 0.31469400  | 0.04520500  |
| C | 4.62842900  | 2.17552900  | -1.69628500 |
| C | 4.48683500  | -1.85514400 | 1.29732600  |
| F | 4.50330800  | 3.25949600  | -0.90236300 |
| F | 5.95153100  | 1.92268800  | -1.81490500 |
| F | 4.16849500  | 2.52089700  | -2.91828500 |
| F | 4.93087800  | -2.97119600 | 0.67388000  |
| F | 5.55260000  | -1.28654500 | 1.89813600  |
| F | 3.64041500  | -2.26539400 | 2.27089900  |
| S | 0.79017500  | -2.98583700 | -2.18146900 |
| H | 1.92336900  | -1.93994100 | 0.45837900  |
| H | -0.06915900 | 0.40500300  | -1.15103700 |
| H | -1.96091300 | -0.77076400 | -1.27470300 |
| C | -0.87003100 | -4.69073000 | -0.26875200 |
| H | -1.39961900 | -5.38129800 | -0.91915400 |
| H | -0.17853900 | -3.94328900 | -1.17632300 |
| H | 0.01649900  | -5.11035000 | 0.20529900  |
| N | -2.09142500 | 2.18562800  | 1.19897900  |
| S | -0.64463300 | 2.53415500  | 0.66499000  |
| O | 0.38945600  | 2.18994800  | 1.64783800  |
| O | -0.39713200 | 2.12675100  | -0.75206900 |
| C | -0.61837000 | 4.39989200  | 0.57663800  |
| F | -0.84568500 | 4.91725900  | 1.78868800  |
| F | 0.58091600  | 4.80891700  | 0.14844400  |
| F | -1.55578400 | 4.84329300  | -0.26656000 |
| C | -4.71290900 | -2.35734000 | -1.48569200 |
| H | -5.48442700 | -2.80184300 | -0.84530500 |

|   |             |             |             |
|---|-------------|-------------|-------------|
| H | -5.12093000 | -2.30214900 | -2.50232900 |
| H | -4.51452700 | -1.34229800 | -1.13084700 |
| C | -3.78856000 | -4.58320600 | -2.10571600 |
| H | -4.13568000 | -4.43785000 | -3.13581100 |
| H | -4.60209000 | -5.06588500 | -1.55236800 |
| H | -2.94675200 | -5.28057000 | -2.14674500 |
| C | -4.63060900 | 2.47157500  | -1.81099300 |
| H | -4.21341200 | 1.68643400  | -2.44794900 |
| H | -4.74158500 | 3.39479600  | -2.38293000 |
| H | -5.60976300 | 2.15404700  | -1.43449700 |
| C | -4.88593000 | 2.45044400  | 2.19718300  |
| H | -4.05090900 | 2.68389900  | 2.86268400  |
| H | -5.73802300 | 2.08309800  | 2.77265400  |
| H | -5.17547300 | 3.34922400  | 1.64249600  |

INT-2

0 imaginary frequencies

H = -3546.193130

G = -3546.330877

E(M06-2X-DCM) = -3546.673294

|   |             |             |             |
|---|-------------|-------------|-------------|
| O | -3.88435500 | 2.28346700  | -1.11042600 |
| O | -4.72330200 | 0.98356400  | 0.94784400  |
| P | -3.40465700 | 1.25137000  | 0.04490700  |
| O | -2.98334800 | -0.07840400 | -0.51934100 |
| C | -3.21646200 | -3.55123800 | -1.20508900 |
| C | -2.99241500 | -3.33050900 | 0.34353100  |
| H | -3.58087500 | -4.09924400 | 0.86953300  |
| H | -3.42166900 | -2.36245300 | 0.59239100  |
| C | -1.03841900 | -2.46867200 | 1.79080300  |
| C | -1.77886100 | -1.35250500 | 2.27056400  |
| C | 0.32520100  | -2.57587800 | 2.18922900  |
| C | -1.18058300 | -0.39590900 | 3.07508500  |
| H | -2.81580300 | -1.21663300 | 1.99503200  |
| C | 0.92273600  | -1.60390800 | 2.97438100  |
| H | 0.92991700  | -3.40397700 | 1.84047400  |
| C | 0.17295800  | -0.50536500 | 3.41230700  |
| H | -1.74879900 | 0.47073700  | 3.39087600  |
| H | 1.97797100  | -1.68400500 | 3.21675100  |
| H | 0.64342900  | 0.27853500  | 3.99694400  |
| C | -1.59416900 | -3.42834000 | 0.87418700  |
| C | -1.98944000 | -3.02850900 | -2.01783500 |
| H | -1.33317600 | -3.84918000 | -2.30946600 |
| H | -2.35122200 | -2.55586500 | -2.94080300 |
| N | -1.17111700 | -2.07348700 | -1.27719400 |

|   |             |             |             |
|---|-------------|-------------|-------------|
| C | 0.19481500  | -1.97555900 | -1.40204900 |
| N | 0.69434900  | -0.78211200 | -0.98515800 |
| C | 2.05724100  | -0.43660000 | -0.79056900 |
| C | 2.94225100  | -1.27201900 | -0.10655600 |
| C | 2.48959200  | 0.82473600  | -1.21801800 |
| C | 4.24673600  | -0.84851500 | 0.14534100  |
| C | 3.79978200  | 1.23035600  | -0.96886900 |
| H | 1.79705500  | 1.48788400  | -1.72123500 |
| C | 4.69023400  | 0.39903900  | -0.28781600 |
| H | 5.70571400  | 0.72151800  | -0.09340400 |
| C | 4.24685700  | 2.60837400  | -1.38515600 |
| C | 5.15620900  | -1.77400800 | 0.90652000  |
| F | 4.07614900  | 3.50845600  | -0.39282900 |
| F | 5.56067700  | 2.62463700  | -1.70838800 |
| F | 3.55887200  | 3.05849200  | -2.45517900 |
| F | 5.51925400  | -2.84762700 | 0.17247900  |
| F | 6.28611900  | -1.16347800 | 1.31514800  |
| F | 4.53694500  | -2.26146900 | 2.01664000  |
| S | 1.14577100  | -3.26601900 | -1.96605000 |
| H | 2.61292500  | -2.24115900 | 0.23977300  |
| H | 0.05248900  | 0.00882900  | -0.83768200 |
| H | -1.68273500 | -1.22387800 | -0.98310700 |
| C | -0.83797500 | -4.66902700 | 0.56411600  |
| H | -1.50000000 | -5.47582400 | 0.25293400  |
| H | -0.13417300 | -4.47320500 | -0.27827300 |
| H | -0.23133000 | -5.01483100 | 1.40276600  |
| N | -2.42109600 | 2.08453300  | 1.02803700  |
| S | -0.92333300 | 2.46137100  | 0.68114700  |
| O | -0.07254800 | 2.42111700  | 1.87679200  |
| O | -0.40197100 | 1.81307000  | -0.55677900 |
| C | -0.98935700 | 4.26948600  | 0.21443600  |
| F | -1.47464500 | 4.98872100  | 1.23225800  |
| F | 0.24402200  | 4.70051700  | -0.07201200 |
| F | -1.77146100 | 4.44931500  | -0.85479100 |
| C | -4.49180900 | -2.75973200 | -1.57248000 |
| H | -5.34542600 | -3.10439400 | -0.97599900 |
| H | -4.74258800 | -2.91785100 | -2.62814300 |
| H | -4.35514400 | -1.69001300 | -1.39534200 |
| C | -3.46434300 | -5.02572400 | -1.58908600 |
| H | -3.68132100 | -5.09478800 | -2.66155500 |
| H | -4.33224700 | -5.42956200 | -1.05503200 |
| H | -2.60728100 | -5.67671600 | -1.39627600 |
| C | -4.59249100 | 1.78501900  | -2.25378600 |
| H | -4.00143700 | 1.02457500  | -2.77182400 |

|   |             |            |             |
|---|-------------|------------|-------------|
| H | -4.75538800 | 2.64095500 | -2.91152000 |
| H | -5.55941600 | 1.35996000 | -1.96068600 |
| C | -5.33570800 | 2.07157100 | 1.66001300  |
| H | -4.62814900 | 2.50751100 | 2.37035400  |
| H | -6.19261300 | 1.64921200 | 2.18916000  |
| H | -5.67749900 | 2.84518100 | 0.96452100  |

INT-3

0 imaginary frequencies

H = -3546.213997

G = -3546.346872

E(M06-2X-DCM) = -3546.706010

|   |             |             |             |
|---|-------------|-------------|-------------|
| O | -1.21403300 | 2.67541300  | -1.92499800 |
| O | -3.68930500 | 2.82046200  | -1.23437700 |
| P | -2.27514400 | 2.18560600  | -0.79513000 |
| O | -2.43554800 | 0.68466900  | -0.82310000 |
| C | -4.29732200 | -2.38036900 | -1.15689100 |
| C | -4.00311100 | -2.53954800 | 0.36765000  |
| H | -4.56117900 | -3.36925200 | 0.81230200  |
| H | -4.30476700 | -1.63407200 | 0.89871500  |
| C | -1.95503100 | -2.23363200 | 1.89370400  |
| C | -2.22418600 | -0.90941200 | 2.27893300  |
| C | -1.23083200 | -3.04574800 | 2.78032200  |
| C | -1.77949500 | -0.41110900 | 3.50222600  |
| H | -2.75862100 | -0.23795200 | 1.61282700  |
| C | -0.79974700 | -2.55290700 | 4.01264500  |
| H | -1.00200600 | -4.07464600 | 2.52943800  |
| C | -1.07112500 | -1.23546000 | 4.37685500  |
| H | -1.96073900 | 0.62883000  | 3.75234000  |
| H | -0.24524300 | -3.20416200 | 4.68271200  |
| H | -0.72468500 | -0.84717500 | 5.33028800  |
| C | -2.48531600 | -2.77724200 | 0.56773100  |
| C | -2.89354400 | -2.19443300 | -1.79507300 |
| H | -2.53285600 | -3.08389900 | -2.30919100 |
| H | -2.83321800 | -1.34011800 | -2.47018700 |
| N | -1.94287300 | -1.91428300 | -0.65195700 |
| C | -0.48391400 | -2.04056500 | -0.99138900 |
| N | 0.23264400  | -1.10500500 | -0.35202100 |
| C | 1.65074000  | -0.94751300 | -0.43585100 |
| C | 2.51878900  | -2.01285300 | -0.18757400 |
| C | 2.15201400  | 0.32554800  | -0.70925100 |
| C | 3.89437300  | -1.79605800 | -0.22790000 |
| C | 3.53264100  | 0.52868200  | -0.73425300 |
| H | 1.47342500  | 1.15158700  | -0.87896700 |



|   |             |             |             |
|---|-------------|-------------|-------------|
| C | 4.41014000  | -0.52704400 | -0.49970300 |
| H | 5.48084300  | -0.36402700 | -0.52041000 |
| C | 4.05633000  | 1.92421900  | -0.96682900 |
| C | 4.83626300  | -2.95420300 | -0.02144200 |
| F | 3.94377800  | 2.68475200  | 0.14178400  |
| F | 5.36073400  | 1.91695100  | -1.31913500 |
| F | 3.37196200  | 2.54944300  | -1.94871400 |
| F | 5.16109300  | -3.54416100 | -1.19348100 |
| F | 5.99152500  | -2.55992700 | 0.55538700  |
| F | 4.29104300  | -3.90887800 | 0.76412400  |
| S | 0.06013200  | -3.19548300 | -2.04441200 |
| H | 2.12981200  | -2.99485800 | 0.04582000  |
| H | -0.22711600 | -0.33912900 | 0.16373400  |
| H | -2.11190000 | -0.89506100 | -0.44525600 |
| C | -2.13279200 | -4.25013800 | 0.33635100  |
| H | -2.47653700 | -4.60500100 | -0.63536400 |
| H | -1.06083100 | -4.44228000 | 0.39481100  |
| H | -2.63440200 | -4.84398500 | 1.10583800  |
| N | -1.86842700 | 2.94558400  | 0.56902000  |
| S | -0.64424600 | 2.56148800  | 1.49576500  |
| O | -0.93116500 | 2.83821900  | 2.90527200  |
| O | -0.01850900 | 1.24980800  | 1.16924200  |
| C | 0.69786700  | 3.78247200  | 1.03909800  |
| F | 0.26113700  | 5.03623900  | 1.17904400  |
| F | 1.75787900  | 3.59653700  | 1.83053900  |
| F | 1.07648900  | 3.59794100  | -0.23715000 |
| C | -5.18585800 | -1.14454300 | -1.40145600 |
| H | -6.13579300 | -1.24826800 | -0.86394500 |
| H | -5.41864500 | -1.04087800 | -2.46819000 |
| H | -4.69423600 | -0.22492100 | -1.07212700 |
| C | -4.99209200 | -3.61876100 | -1.75501700 |
| H | -5.11179200 | -3.51050600 | -2.83957600 |
| H | -5.99212900 | -3.73947400 | -1.32366200 |
| H | -4.43433100 | -4.54314300 | -1.57135500 |
| C | -1.31472300 | 2.15931800  | -3.25993200 |
| H | -1.17409900 | 1.07373200  | -3.26774800 |
| H | -0.52057900 | 2.63721600  | -3.83646000 |
| H | -2.28736900 | 2.40419000  | -3.70052300 |
| C | -3.90956700 | 4.23947900  | -1.13289100 |
| H | -3.79367200 | 4.56608900  | -0.09698700 |
| H | -4.93130500 | 4.41277500  | -1.47586100 |
| H | -3.20776900 | 4.78641100  | -1.77126100 |

l imaginary frequencies

H = -3546.207282

G = -3546.339078

E(M06-2X-DCM) = -3546.697169

|   |             |             |             |
|---|-------------|-------------|-------------|
| O | -3.03816300 | 2.48416000  | -1.87002500 |
| O | -4.44364900 | 0.86784700  | -0.42848200 |
| P | -2.95917000 | 1.44224800  | -0.65707200 |
| O | -2.13948600 | 0.23865900  | -1.18746600 |
| C | -3.44268400 | -3.36573600 | -1.05436200 |
| C | -3.11811400 | -3.28344300 | 0.46522500  |
| H | -3.32806300 | -4.22395400 | 0.98493200  |
| H | -3.74423100 | -2.52347700 | 0.93587900  |
| C | -1.36256800 | -2.09861400 | 1.90056000  |
| C | -2.18245300 | -1.00291400 | 2.21890300  |
| C | -0.34165000 | -2.42838800 | 2.80494000  |
| C | -1.99233900 | -0.26781500 | 3.38712300  |
| H | -2.98395400 | -0.70459100 | 1.55031200  |
| C | -0.15111000 | -1.69774400 | 3.97927500  |
| H | 0.31797300  | -3.26531500 | 2.60892900  |
| C | -0.97457600 | -0.61427400 | 4.27585600  |
| H | -2.62418000 | 0.59106800  | 3.58969100  |
| H | 0.64909400  | -1.97933600 | 4.65825600  |
| H | -0.82161400 | -0.03732400 | 5.18307500  |
| C | -1.61837600 | -2.92444700 | 0.63321200  |
| C | -2.17280300 | -2.79719700 | -1.73626300 |
| H | -1.57022300 | -3.58645400 | -2.18809600 |
| H | -2.39526200 | -2.06813500 | -2.51950500 |
| N | -1.36558700 | -2.10675400 | -0.67605200 |
| C | 0.04649100  | -1.92004300 | -1.03016900 |
| N | 0.63908800  | -0.99901200 | -0.23981100 |
| C | 2.01357700  | -0.61955200 | -0.31268400 |
| C | 3.02628900  | -1.55220900 | -0.07671400 |
| C | 2.33280400  | 0.71452400  | -0.56529600 |
| C | 4.35776900  | -1.14450900 | -0.10322200 |
| C | 3.67172400  | 1.11110100  | -0.58345400 |
| H | 1.54366700  | 1.43631700  | -0.73057400 |
| C | 4.68973700  | 0.18821000  | -0.35678400 |
| H | 5.72722000  | 0.50039200  | -0.37415400 |
| C | 4.01130500  | 2.54146500  | -0.91635100 |
| C | 5.44836400  | -2.13230500 | 0.21938100  |
| F | 3.07968700  | 3.39817600  | -0.44900600 |
| F | 5.20348800  | 2.90661400  | -0.39675200 |
| F | 4.08798800  | 2.73243600  | -2.25390100 |
| F | 6.58553100  | -1.85819200 | -0.45532200 |

|   |             |             |             |
|---|-------------|-------------|-------------|
| F | 5.75917500  | -2.11410700 | 1.53690300  |
| F | 5.08713800  | -3.39790300 | -0.08193400 |
| S | 0.80420600  | -2.72390700 | -2.27488400 |
| H | 2.77716900  | -2.58719300 | 0.12000200  |
| H | 0.06283100  | -0.37541200 | 0.33081200  |
| H | -1.89296700 | -0.75471900 | -0.75424700 |
| C | -0.77452300 | -4.21042400 | 0.59313100  |
| H | -0.98133800 | -4.79176400 | -0.30714800 |
| H | 0.29898400  | -4.00936300 | 0.60636500  |
| H | -1.01878600 | -4.83131200 | 1.46017400  |
| N | -2.56373300 | 2.23164300  | 0.65971300  |
| S | -1.12861300 | 2.53428700  | 1.29339400  |
| O | -1.29035900 | 3.07862700  | 2.63782400  |
| O | -0.15623800 | 1.44219800  | 1.07625500  |
| C | -0.43965000 | 3.92956200  | 0.25442800  |
| F | -1.29967200 | 4.94629200  | 0.19315700  |
| F | 0.71027000  | 4.35168400  | 0.77944500  |
| F | -0.20861700 | 3.48074100  | -0.99360500 |
| C | -4.68750100 | -2.52206300 | -1.38771900 |
| H | -5.56281600 | -2.89682000 | -0.84299900 |
| H | -4.91742800 | -2.57547400 | -2.45902900 |
| H | -4.55089600 | -1.46962300 | -1.12273200 |
| C | -3.69361900 | -4.81292500 | -1.52012600 |
| H | -3.83909200 | -4.85357900 | -2.60639100 |
| H | -4.59683500 | -5.21852000 | -1.04928300 |
| H | -2.85915400 | -5.47732400 | -1.27179500 |
| C | -3.26998600 | 2.03630400  | -3.22215200 |
| H | -2.44647900 | 1.40035400  | -3.55436800 |
| H | -3.31857600 | 2.93963800  | -3.83096600 |
| H | -4.21639600 | 1.49078000  | -3.29017200 |
| C | -5.45461400 | 1.68493700  | 0.20442700  |
| H | -5.11443600 | 2.00343600  | 1.19172300  |
| H | -6.34052400 | 1.05402300  | 0.28536700  |
| H | -5.67470700 | 2.56018600  | -0.41377100 |

1

0 imaginary frequencies

H = -1957.923291

G = -1958.016713

E(M06-2X-DCM) = -1958.271552

|   |             |             |             |
|---|-------------|-------------|-------------|
| C | -4.76464200 | 1.39964300  | 0.32479000  |
| C | -4.42093900 | 0.67216600  | -0.99292300 |
| H | -4.50598800 | 1.37977500  | -1.82621800 |
| H | -5.09457300 | -0.16331300 | -1.20534500 |

|   |             |             |             |
|---|-------------|-------------|-------------|
| C | -2.85342800 | -1.30919200 | -0.55783600 |
| C | -2.52963400 | -1.76631300 | 0.72894000  |
| C | -3.13549200 | -2.27144500 | -1.54252600 |
| C | -2.47992400 | -3.13292400 | 1.02009400  |
| H | -2.31634300 | -1.04719800 | 1.51379300  |
| C | -3.09283300 | -3.63431100 | -1.25242400 |
| H | -3.39910500 | -1.95951100 | -2.54853300 |
| C | -2.76063000 | -4.07327700 | 0.03086700  |
| H | -2.22357500 | -3.45538700 | 2.02557900  |
| H | -3.31668500 | -4.35502200 | -2.03427300 |
| H | -2.72208300 | -5.13546000 | 0.25488300  |
| C | -2.93585400 | 0.19291700  | -0.90504900 |
| C | -3.39986700 | 1.99775000  | 0.71453100  |
| H | -3.25210000 | 2.99081400  | 0.26974400  |
| H | -3.27211700 | 2.11292200  | 1.79377000  |
| N | -2.38757200 | 1.06503100  | 0.18728300  |
| C | -1.06434400 | 1.28075900  | 0.46918800  |
| N | -0.21830900 | 0.28897500  | 0.00259200  |
| C | 1.18725500  | 0.21531600  | 0.03772100  |
| C | 2.02522300  | 1.32156400  | -0.16267700 |
| C | 1.75764800  | -1.05410100 | 0.19801100  |
| C | 3.40698300  | 1.14273300  | -0.18086700 |
| C | 3.14223400  | -1.21616700 | 0.16832200  |
| H | 1.11829400  | -1.91889600 | 0.34960000  |
| C | 3.98078300  | -0.11903900 | -0.01451000 |
| H | 5.05675600  | -0.24279300 | -0.03044400 |
| C | 3.72958200  | -2.58132700 | 0.41079100  |
| C | 4.30035900  | 2.32242000  | -0.46962300 |
| F | 2.93348700  | -3.56140300 | -0.07555600 |
| F | 4.94189900  | -2.71738100 | -0.16709200 |
| F | 3.89039800  | -2.82844800 | 1.73100800  |
| F | 5.49468000  | 2.20684000  | 0.15247400  |
| F | 4.55862200  | 2.43057000  | -1.79506300 |
| F | 3.74605100  | 3.48718200  | -0.07923000 |
| S | -0.53960000 | 2.61196200  | 1.35339500  |
| H | 1.60143000  | 2.30665400  | -0.29389200 |
| H | -0.66133500 | -0.60513000 | -0.17560800 |
| C | -2.24252900 | 0.50046200  | -2.25548500 |
| H | -2.20739500 | 1.58408500  | -2.40488600 |
| H | -1.22411700 | 0.11235600  | -2.31513400 |
| H | -2.81791500 | 0.07058000  | -3.08068700 |
| C | -5.28695200 | 0.43154000  | 1.40344100  |
| H | -6.22461700 | -0.03568600 | 1.07933300  |
| H | -5.48765300 | 0.97058700  | 2.33693400  |

|   |             |             |             |
|---|-------------|-------------|-------------|
| H | -4.57760600 | -0.36968200 | 1.62481600  |
| C | -5.80585100 | 2.50787000  | 0.10115700  |
| H | -5.98966400 | 3.06630300  | 1.02679000  |
| H | -6.76335600 | 2.08419200  | -0.22421000 |
| H | -5.47458800 | 3.22186400  | -0.66192900 |

INT-4

0 imaginary frequencies

H = -5198.743377

G = -5198.936847

E(M06-2X-DCM) = -5199.589909

|   |            |             |             |
|---|------------|-------------|-------------|
| O | 1.73030800 | -2.28461700 | -0.21529400 |
| O | 3.12428800 | -0.14038200 | 0.18923000  |
| P | 1.59238200 | -0.65568700 | -0.05080800 |
| O | 0.80199700 | -0.28148200 | 1.16772700  |
| C | 3.31988300 | -4.43553400 | 3.01251800  |
| C | 4.15502000 | -3.82663400 | 2.08207800  |
| C | 3.62107300 | -3.17020900 | 0.96285600  |
| C | 1.36648500 | -3.66941900 | 1.75017800  |
| C | 1.94037000 | -4.37802500 | 2.82050600  |
| C | 4.08348200 | -0.33523700 | -0.80935800 |
| C | 4.70106300 | -1.57907300 | -0.93356500 |
| C | 5.52746400 | -1.82472400 | -2.04166100 |
| C | 5.82941100 | -0.80868700 | -2.94139300 |
| C | 5.30676100 | 0.46531700  | -2.72171100 |
| C | 4.41814100 | 0.73099700  | -1.66661800 |
| H | 1.27677000 | -4.87455800 | 3.52238400  |
| H | 5.56782500 | 1.28009200  | -3.39049600 |
| C | 4.74254500 | -2.77934400 | 0.00749200  |
| C | 5.93335800 | -2.65180700 | 1.01836300  |
| H | 5.89168100 | -1.66131800 | 1.48616300  |
| H | 6.90790200 | -2.74902400 | 0.53024700  |
| H | 7.03024300 | -3.36904000 | -1.78190300 |
| H | 5.87074000 | -3.72398300 | -3.05765700 |
| C | 2.23848800 | -3.03829800 | 0.84091200  |
| H | 3.73061200 | -4.95588700 | 3.87416600  |
| H | 6.47363600 | -0.99531300 | -3.79695700 |
| C | 5.66540800 | -3.73983500 | 2.07983400  |
| H | 6.07312200 | -3.48174000 | 3.06401200  |
| H | 6.11854300 | -4.69941300 | 1.79358300  |
| C | 5.97263900 | -3.27119100 | -2.06474300 |
| C | 5.04607100 | -3.92407500 | -1.01604200 |
| H | 4.10632800 | -4.22896200 | -1.49054200 |
| H | 5.48209700 | -4.80733900 | -0.53862900 |

|   |              |              |              |
|---|--------------|--------------|--------------|
| C | 3. 92314800  | 2. 12903400  | -1. 47086300 |
| C | 3. 10853900  | 2. 73966500  | -2. 45561500 |
| C | 4. 36698700  | 2. 87551400  | -0. 34981600 |
| C | 2. 60674700  | 2. 03212800  | -3. 59527100 |
| C | 2. 74110100  | 4. 13132200  | -2. 31559800 |
| C | 3. 97310600  | 4. 25963400  | -0. 21323000 |
| C | 1. 83218500  | 2. 65722500  | -4. 53594200 |
| H | 2. 81318000  | 0. 97331900  | -3. 68679600 |
| C | 1. 93514400  | 4. 74675900  | -3. 32426200 |
| C | 3. 17620800  | 4. 84892700  | -1. 19852900 |
| C | 1. 49868700  | 4. 03539500  | -4. 40842200 |
| H | 1. 44416700  | 2. 08792800  | -5. 37548700 |
| H | 1. 67290800  | 5. 79521800  | -3. 20369600 |
| H | 2. 89018600  | 5. 89355200  | -1. 09441000 |
| H | 0. 88265300  | 4. 51222800  | -5. 16611500 |
| C | -0. 12325700 | -3. 65597300 | 1. 61669300  |
| C | -0. 91382800 | -3. 06100700 | 2. 63189900  |
| C | -0. 74504100 | -4. 33139600 | 0. 53718000  |
| C | -0. 34980100 | -2. 34063500 | 3. 73481200  |
| C | -2. 35404200 | -3. 17083400 | 2. 57447600  |
| C | -2. 18763200 | -4. 40496100 | 0. 47534500  |
| C | -1. 13954900 | -1. 81288000 | 4. 72426600  |
| H | 0. 72467500  | -2. 21013900 | 3. 77641400  |
| C | -3. 14247400 | -2. 60186600 | 3. 62407700  |
| C | -2. 95134800 | -3. 83580000 | 1. 49947600  |
| C | -2. 55676000 | -1. 95003800 | 4. 67644300  |
| H | -0. 67962400 | -1. 28656900 | 5. 55717900  |
| H | -4. 22345000 | -2. 70836500 | 3. 56973200  |
| H | -4. 03564800 | -3. 91048700 | 1. 45560300  |
| H | -3. 16782300 | -1. 53951300 | 5. 47648400  |
| C | 5. 64403400  | 3. 08445600  | 1. 72725500  |
| H | 6. 30057500  | 2. 64427900  | 2. 47341300  |
| C | 5. 22753600  | 2. 33311800  | 0. 65912100  |
| H | 5. 56206900  | 1. 30644000  | 0. 56520200  |
| C | 5. 23442200  | 4. 44155300  | 1. 86676300  |
| H | 5. 57726500  | 5. 02416500  | 2. 71797200  |
| C | 4. 42497700  | 5. 00829700  | 0. 91892900  |
| H | 4. 11140000  | 6. 04590300  | 1. 00447300  |
| C | -0. 63918000 | -5. 62718100 | -1. 53132600 |
| H | -0. 05147300 | -6. 10930600 | -2. 30773000 |
| C | -2. 06026000 | -5. 66909800 | -1. 60183300 |
| H | -2. 54350500 | -6. 17412900 | -2. 43364500 |
| C | -2. 81076800 | -5. 07819300 | -0. 62246100 |
| H | -3. 89597300 | -5. 09941200 | -0. 66360800 |

|   |             |             |             |
|---|-------------|-------------|-------------|
| C | -0.00614100 | -4.98537100 | -0.49983800 |
| H | 1.07653200  | -4.96958900 | -0.46279400 |
| C | 0.73650900  | 2.43602000  | 3.74157900  |
| C | 1.27677300  | 3.18203100  | 2.47827600  |
| H | 2.32991800  | 3.40924100  | 2.67623300  |
| H | 1.27845700  | 2.47757300  | 1.64063700  |
| C | -0.56682800 | 4.42385100  | 1.11468100  |
| C | -0.49962200 | 3.64371900  | -0.05414600 |
| C | -1.71493500 | 5.21071800  | 1.31907500  |
| C | -1.53125900 | 3.66368300  | -0.99391600 |
| H | 0.37899800  | 3.03982500  | -0.25980400 |
| C | -2.75054400 | 5.22910500  | 0.38443200  |
| H | -1.79495100 | 5.80492100  | 2.22561500  |
| C | -2.66112900 | 4.45893400  | -0.77809300 |
| H | -1.44109500 | 3.05312200  | -1.88762600 |
| H | -3.62888100 | 5.84354500  | 0.56638700  |
| H | -3.47148500 | 4.46712800  | -1.50251500 |
| C | 0.56729600  | 4.47003400  | 2.08438200  |
| C | -0.75813600 | 2.05566400  | 3.61616200  |
| H | -1.34852700 | 2.97559500  | 3.56268100  |
| H | -1.04602100 | 1.51225700  | 4.52799900  |
| N | -1.10331600 | 1.23676100  | 2.44311700  |
| C | -2.32560500 | 1.08085900  | 1.96317700  |
| N | -2.54205300 | 0.44922100  | 0.80448800  |
| C | -3.80323500 | 0.32047800  | 0.14728900  |
| C | -4.56800700 | 1.44801600  | -0.15524200 |
| C | -4.22625200 | -0.94780100 | -0.25617400 |
| C | -5.78834000 | 1.29556300  | -0.81615800 |
| C | -5.44287600 | -1.08216300 | -0.92394200 |
| H | -3.60145700 | -1.81022800 | -0.05511800 |
| C | -6.23522800 | 0.03342800  | -1.20028600 |
| H | -7.18008600 | -0.07977500 | -1.71600600 |
| C | -5.88846400 | -2.46230100 | -1.33733300 |
| C | -6.58259900 | 2.53417700  | -1.14147100 |
| F | -7.09873700 | -2.45117700 | -1.93073900 |
| F | -5.97692100 | -3.29172700 | -0.26385800 |
| F | -5.01696700 | -3.03201000 | -2.19252000 |
| F | -7.78845300 | 2.24346300  | -1.66774900 |
| F | -5.93071300 | 3.31918200  | -2.03136800 |
| F | -6.78771200 | 3.28801300  | -0.03779200 |
| S | -3.76018100 | 1.67907700  | 2.83315500  |
| H | -4.19987000 | 2.43917200  | 0.08715600  |
| H | -1.75390400 | 0.02429200  | 0.28464900  |
| H | -0.34180000 | 0.72756700  | 1.94863200  |

|   |             |             |             |
|---|-------------|-------------|-------------|
| C | 0.97589900  | 5.65196200  | 2.57526000  |
| H | 1.81205900  | 5.72125000  | 3.26566000  |
| H | -3.15487400 | 1.72196600  | 4.03403900  |
| H | 0.51055600  | 6.58774700  | 2.27849600  |
| N | 1.17050000  | -0.10283300 | -1.50496300 |
| S | -0.26516100 | -0.28192400 | -2.14485000 |
| O | -0.69741800 | 0.90927600  | -2.88332000 |
| O | -1.26065500 | -0.90805700 | -1.22717800 |
| C | 0.00272700  | -1.57308600 | -3.46799100 |
| F | 0.89511200  | -1.12562400 | -4.36212900 |
| F | -1.15178400 | -1.81699000 | -4.09723000 |
| F | 0.45791700  | -2.71011800 | -2.93555600 |
| C | 1.60942400  | 1.18815200  | 3.98499300  |
| H | 1.26917400  | 0.64617900  | 4.87671100  |
| H | 1.60169000  | 0.50108100  | 3.13546400  |
| H | 2.64827600  | 1.49181300  | 4.15732300  |
| C | 0.82746800  | 3.33952200  | 4.98887300  |
| H | 0.47618600  | 2.80933200  | 5.88291700  |
| H | 1.86886200  | 3.62912700  | 5.16695300  |
| H | 0.24051700  | 4.25653700  | 4.87802400  |

INT-4'

0 imaginary frequencies

H = -5198.748664

G = -5198.944452

E(M06-2X-DCM) = -5199.586957

|   |             |             |            |
|---|-------------|-------------|------------|
| C | 0.10562400  | -2.25127100 | 4.51449800 |
| C | 0.23377400  | -0.89102700 | 5.27818100 |
| H | -0.72748300 | -0.72281900 | 5.77867300 |
| H | 0.96871900  | -1.03889500 | 6.07760300 |
| C | 2.02594300  | 0.69388300  | 4.26800000 |
| C | 2.99986900  | 0.45791700  | 5.25381000 |
| C | 2.44202900  | 1.28897000  | 3.06412900 |
| C | 4.33377700  | 0.80869700  | 5.04691600 |
| H | 2.71682700  | 0.02071100  | 6.20643200 |
| C | 3.77571700  | 1.63001400  | 2.85149900 |
| H | 1.71541500  | 1.45741800  | 2.27496300 |
| C | 4.72887000  | 1.39206500  | 3.84376100 |
| H | 5.06498500  | 0.61911100  | 5.82817900 |
| H | 4.06969500  | 2.07115400  | 1.90359000 |
| H | 5.77123700  | 1.64856700  | 3.67550100 |
| C | 0.58931400  | 0.36706200  | 4.50258300 |
| C | 1.39558600  | -2.67241500 | 3.76521000 |
| H | 1.34893000  | -3.75245500 | 3.56723800 |



|   |              |              |              |
|---|--------------|--------------|--------------|
| H | 2. 27049300  | -2. 51262400 | 4. 40305100  |
| N | 1. 61528900  | -1. 97402800 | 2. 50611900  |
| C | 2. 73856100  | -2. 11361900 | 1. 75494800  |
| N | 2. 63761200  | -1. 41928000 | 0. 56452200  |
| C | 3. 48442200  | -1. 26413300 | -0. 53587400 |
| C | 4. 78859900  | -1. 76857700 | -0. 65631100 |
| C | 2. 95063700  | -0. 51272900 | -1. 60356400 |
| C | 5. 51736000  | -1. 52472400 | -1. 82349700 |
| C | 3. 69631100  | -0. 27955600 | -2. 75170900 |
| H | 1. 95288900  | -0. 09609800 | -1. 51786500 |
| C | 4. 99274700  | -0. 78490000 | -2. 88009700 |
| H | 5. 58080400  | -0. 59217500 | -3. 76921900 |
| C | 3. 09610100  | 0. 50026700  | -3. 88792900 |
| C | 6. 89315100  | -2. 12794000 | -1. 95393900 |
| F | 2. 66582700  | -0. 30160300 | -4. 89320500 |
| F | 3. 98555500  | 1. 36119400  | -4. 43509300 |
| F | 2. 02408300  | 1. 23469000  | -3. 49622600 |
| F | 7. 66340400  | -1. 43809200 | -2. 82727300 |
| F | 6. 83401900  | -3. 40228500 | -2. 40632500 |
| F | 7. 54685400  | -2. 15866400 | -0. 77475300 |
| S | 4. 05188700  | -3. 04162600 | 2. 25904000  |
| C | -0. 12507000 | -3. 33305600 | 5. 59339400  |
| H | -0. 97774400 | -3. 07238600 | 6. 23094400  |
| H | -0. 33354300 | -4. 30590300 | 5. 13405900  |
| H | 0. 75465800  | -3. 44712300 | 6. 23849200  |
| C | -1. 11949100 | -2. 23431200 | 3. 58207400  |
| H | -1. 20557300 | -3. 17449600 | 3. 02695800  |
| H | -2. 03883500 | -2. 10308000 | 4. 16560000  |
| H | -1. 08646800 | -1. 41979700 | 2. 85239000  |
| H | 5. 22129200  | -2. 33190900 | 0. 15844500  |
| C | -0. 37800700 | 1. 21796600  | 4. 10562900  |
| H | 1. 73565200  | -0. 96791100 | 0. 42303700  |
| H | -1. 42560200 | 1. 02878700  | 4. 33189700  |
| H | -0. 14630000 | 2. 17259800  | 3. 64086300  |
| H | 0. 80852500  | -1. 54755900 | 2. 06405700  |
| H | -1. 58498100 | 0. 96917100  | 2. 01152000  |
| O | -0. 54919600 | 1. 51146900  | -1. 04296700 |
| O | -2. 40674500 | -0. 31748600 | -1. 03987700 |
| P | -1. 21587500 | 0. 33180400  | -0. 17208000 |
| O | -0. 13308300 | -0. 54960000 | 0. 32889600  |
| C | -2. 91958900 | 4. 65156500  | -2. 48666600 |
| C | -2. 95258100 | 3. 40563800  | -3. 10346600 |
| C | -2. 08705900 | 2. 38225900  | -2. 68942700 |
| C | -1. 17615700 | 3. 85507900  | -0. 96255000 |

|   |             |             |             |
|---|-------------|-------------|-------------|
| C | -2.00464700 | 4.87673300  | -1.45921300 |
| C | -2.05157800 | -0.97997000 | -2.24734900 |
| C | -1.80963000 | -0.21284300 | -3.38392900 |
| C | -1.27418400 | -0.84378600 | -4.51906800 |
| C | -1.08925700 | -2.22149700 | -4.54629600 |
| C | -1.45915400 | -2.97805000 | -3.43588500 |
| C | -1.93817600 | -2.38221300 | -2.25698700 |
| H | -1.93089300 | 5.86088900  | -1.00684000 |
| H | -1.36318200 | -4.05932600 | -3.45866800 |
| C | -2.12119800 | 1.24478900  | -3.70269400 |
| C | -3.57731200 | 1.40752900  | -4.25342600 |
| H | -3.69983000 | 0.95162500  | -5.24079400 |
| H | -4.27378700 | 0.91489100  | -3.56536300 |
| H | 0.05161300  | 0.02051800  | -6.00553900 |
| H | -1.65895400 | 0.09206100  | -6.43542300 |
| C | -1.28963100 | 2.59136100  | -1.56938400 |
| H | -3.58084200 | 5.45054000  | -2.81169200 |
| H | -0.67441700 | -2.70808300 | -5.42501300 |
| C | -3.82662000 | 2.93248200  | -4.24479300 |
| H | -3.52579900 | 3.39482000  | -5.19494600 |
| H | -4.88195500 | 3.18452700  | -4.09226600 |
| C | -0.95395600 | 0.16731200  | -5.59618100 |
| C | -1.08734600 | 1.51183300  | -4.85055100 |
| H | -1.39529100 | 2.33882400  | -5.49694500 |
| H | -0.12365200 | 1.77453300  | -4.40624400 |
| C | -2.36896100 | -3.26836000 | -1.12915200 |
| C | -3.75345700 | -3.48930700 | -0.92304500 |
| C | -1.40983100 | -3.98402400 | -0.37436200 |
| C | -4.76848500 | -2.88839200 | -1.73534200 |
| C | -4.18160600 | -4.39699100 | 0.11705600  |
| C | -1.85411600 | -4.91635000 | 0.63857600  |
| C | -6.09866400 | -3.13471500 | -1.51549900 |
| H | -4.47199000 | -2.23000500 | -2.54440900 |
| C | -5.58011000 | -4.60887000 | 0.32796500  |
| C | -3.22235400 | -5.07865000 | 0.87108300  |
| C | -6.51556700 | -3.99656500 | -0.46180000 |
| H | -6.84626500 | -2.66801000 | -2.15127700 |
| H | -5.88288500 | -5.28409400 | 1.12483300  |
| H | -3.55021700 | -5.77427000 | 1.64107300  |
| H | -7.57490500 | -4.17326100 | -0.29732000 |
| C | -0.18670500 | 4.17461100  | 0.11420000  |
| C | 1.20122300  | 4.16303800  | -0.18291900 |
| C | -0.63911900 | 4.59885100  | 1.38906800  |
| C | 1.72786100  | 3.77881700  | -1.45816100 |

|   |             |             |             |
|---|-------------|-------------|-------------|
| C | 2.14814100  | 4.58091700  | 0.82669700  |
| C | 0.32293700  | 5.01104600  | 2.38772200  |
| C | 3.07529800  | 3.78407000  | -1.71025000 |
| H | 1.04447700  | 3.47854400  | -2.24293500 |
| C | 3.54586500  | 4.58005500  | 0.52176100  |
| C | 1.68540000  | 4.98952900  | 2.08002600  |
| C | 4.00159800  | 4.18961200  | -0.70842600 |
| H | 3.44140300  | 3.46915800  | -2.68273100 |
| H | 4.23898000  | 4.90141300  | 1.29544200  |
| H | 2.40442300  | 5.29974500  | 2.83504000  |
| H | 5.06565700  | 4.19172500  | -0.92772600 |
| C | 0.90116800  | -4.59158900 | 0.13886900  |
| H | 1.96664500  | -4.47044800 | -0.03051600 |
| C | 0.00145200  | -3.84673000 | -0.57825200 |
| H | 0.35715900  | -3.13729500 | -1.31651900 |
| C | 0.45734400  | -5.51740700 | 1.12652300  |
| H | 1.18979700  | -6.09552300 | 1.68243300  |
| C | -0.88122000 | -5.66693600 | 1.37182100  |
| H | -1.23399400 | -6.36961000 | 2.12333000  |
| C | -2.42553100 | 5.03917800  | 3.00007900  |
| H | -3.48207500 | 5.03226300  | 3.25083100  |
| C | -1.47415700 | 5.45367900  | 3.97417600  |
| H | -1.81238100 | 5.77517200  | 4.95526000  |
| C | -0.13911100 | 5.43587300  | 3.67309600  |
| H | 0.60092600  | 5.74220600  | 4.40844400  |
| C | -2.02402700 | 4.62920300  | 1.75494800  |
| H | -2.76650700 | 4.31146000  | 1.03233800  |
| N | -2.09897800 | 0.96573900  | 1.12474700  |
| S | -3.72254500 | 1.36739800  | 1.33278200  |
| C | -4.62037300 | -0.30006500 | 1.35827200  |
| O | -4.21341900 | 2.08272900  | 0.16540000  |
| O | -3.81377300 | 1.88228900  | 2.69301500  |
| F | -5.09068500 | -0.56990300 | 0.15062800  |
| F | -3.78944100 | -1.26290800 | 1.75844200  |
| F | -5.62847800 | -0.19252900 | 2.22101000  |

INT-4''

0 imaginary frequencies

H = -5198.729834

G = -5198.925503

E(M06-2X-DCM) = -5199.572203

|   |            |             |             |
|---|------------|-------------|-------------|
| O | 1.92895800 | -2.10241500 | -0.00387400 |
| O | 3.66493500 | -0.17635100 | 0.19236900  |
| P | 2.09523800 | -0.52184500 | 0.15616300  |

|   |             |             |             |
|---|-------------|-------------|-------------|
| O | 1.63543000  | -0.19594000 | 1.63835200  |
| N | 1.42332900  | 0.26850500  | -1.02986800 |
| S | -0.09946400 | 0.27705300  | -1.54457700 |
| C | -0.06762800 | -0.96429800 | -2.94586100 |
| F | -1.31166600 | -1.13465400 | -3.39371400 |
| F | 0.42214900  | -2.13305500 | -2.52996400 |
| F | 0.69886500  | -0.49948800 | -3.93865300 |
| C | -1.26288900 | 2.50900100  | 4.11186300  |
| C | -0.03766200 | 3.44891600  | 3.85360300  |
| H | 0.75320100  | 3.13501900  | 4.54491000  |
| H | -0.32644400 | 4.46010500  | 4.16869800  |
| C | -0.13052200 | 4.32108900  | 1.41320100  |
| C | -0.77158100 | 5.53648800  | 1.72065800  |
| C | -0.14158700 | 3.89262900  | 0.07401300  |
| C | -1.39411300 | 6.28996900  | 0.72658500  |
| H | -0.76633100 | 5.91324100  | 2.73868600  |
| C | -0.77853800 | 4.63749900  | -0.91839300 |
| H | 0.33952700  | 2.96191700  | -0.20285000 |
| C | -1.40713800 | 5.84075100  | -0.59562100 |
| H | -1.87441100 | 7.22897700  | 0.98864800  |
| H | -0.78140200 | 4.25835900  | -1.93488800 |
| H | -1.90855300 | 6.42151900  | -1.36501700 |
| C | 0.56309800  | 3.51979800  | 2.46293700  |
| C | -2.54568400 | 2.90400300  | 3.31541300  |
| H | -3.42208000 | 2.60972600  | 3.89509500  |
| H | -2.59101300 | 3.99271200  | 3.19044000  |
| N | -2.72370900 | 2.27184100  | 2.01397600  |
| C | -3.79944100 | 1.51176900  | 1.66569100  |
| N | -3.68231400 | 1.00466700  | 0.38052300  |
| C | -4.70277600 | 0.42559800  | -0.39603100 |
| C | -6.00088000 | 0.95771000  | -0.42392900 |
| C | -4.38860100 | -0.65570900 | -1.22985400 |
| C | -6.96541400 | 0.39505100  | -1.25508600 |
| C | -5.36684200 | -1.19902200 | -2.06625000 |
| H | -3.38336300 | -1.06283600 | -1.22912800 |
| C | -6.66231300 | -0.68701200 | -2.08309000 |
| H | -7.41427000 | -1.10669900 | -2.73998300 |
| C | -5.04142800 | -2.39841400 | -2.91330600 |
| C | -8.36903000 | 0.94092900  | -1.23750000 |
| F | -3.74854300 | -2.41897000 | -3.30270300 |
| F | -5.26176200 | -3.56166500 | -2.23974400 |
| F | -5.80192100 | -2.45473200 | -4.02829500 |
| F | -8.97246200 | 0.80558300  | -2.44158100 |
| F | -9.14581500 | 0.29562700  | -0.33793800 |

|   |             |             |             |
|---|-------------|-------------|-------------|
| F | -8.39927300 | 2.25251600  | -0.91591200 |
| S | -5.10324300 | 1.19291600  | 2.68455000  |
| H | -6.24859700 | 1.80982900  | 0.19343200  |
| C | 1.74339800  | 2.91929700  | 2.19880100  |
| H | -2.73612400 | 0.79172900  | 0.06436200  |
| H | 2.29430100  | 2.40560800  | 2.98484500  |
| H | 2.25199300  | 3.04131500  | 1.24643000  |
| O | -1.05549600 | -0.25137400 | -0.54724500 |
| H | -2.11593500 | 2.57857800  | 1.26160200  |
| O | -0.40638100 | 1.55426300  | -2.18520800 |
| H | 1.46990500  | 0.76106200  | 1.81109000  |
| C | 5.72289600  | -0.90330700 | -3.38844300 |
| C | 5.44074900  | -1.94602800 | -2.51290700 |
| C | 4.84358400  | -1.69217200 | -1.26725000 |
| C | 4.73068800  | 0.69096700  | -1.81705700 |
| C | 5.40395400  | 0.40218500  | -3.01681600 |
| C | 2.54668000  | -3.03026000 | 0.86718400  |
| C | 3.90173200  | -3.30429700 | 0.70131000  |
| C | 4.53836100  | -4.13089100 | 1.64214900  |
| C | 3.80825200  | -4.75990900 | 2.64423300  |
| C | 2.43147700  | -4.55583200 | 2.71222200  |
| C | 1.76429300  | -3.67185500 | 1.84535100  |
| H | 5.65190000  | 1.22815900  | -3.67615000 |
| H | 1.84496600  | -5.07253900 | 3.46524400  |
| C | 4.88336000  | -2.95856600 | -0.41654900 |
| C | 4.86017300  | -4.04609500 | -1.54339100 |
| H | 3.82374600  | -4.19817700 | -1.86591500 |
| H | 5.24734600  | -5.00997300 | -1.20015000 |
| H | 6.30827600  | -5.16956300 | 0.94237100  |
| H | 6.62030000  | -4.07790600 | 2.28711100  |
| C | 4.42609200  | -0.39625700 | -0.97927900 |
| H | 6.19525400  | -1.09642100 | -4.34812800 |
| H | 4.29849300  | -5.41469000 | 3.36010100  |
| C | 5.68181900  | -3.42850800 | -2.69565400 |
| H | 5.36070200  | -3.78452600 | -3.68091700 |
| H | 6.74894600  | -3.67394700 | -2.60502200 |
| C | 6.02540500  | -4.19992500 | 1.37495400  |
| C | 6.23644600  | -3.05021200 | 0.36848700  |
| H | 6.39518600  | -2.10917300 | 0.90780600  |
| H | 7.09291400  | -3.20226600 | -0.29485900 |
| C | 0.28688300  | -3.48896700 | 1.97364500  |
| C | -0.26203300 | -3.01270400 | 3.19170900  |
| C | -0.56658400 | -3.88361100 | 0.91206300  |
| C | 0.53695200  | -2.60584200 | 4.31026200  |

|   |             |             |             |
|---|-------------|-------------|-------------|
| C | -1.69798300 | -2.92951600 | 3.33890700  |
| C | -1.99640700 | -3.72906300 | 1.05338500  |
| C | -0.03484400 | -2.22414800 | 5.49671800  |
| H | 1.61634700  | -2.60225700 | 4.21225200  |
| C | -2.25424800 | -2.51671600 | 4.59051100  |
| C | -2.52171000 | -3.26116700 | 2.26039200  |
| C | -1.45003800 | -2.19117900 | 5.64905400  |
| H | 0.59929600  | -1.93404700 | 6.33065300  |
| H | -3.33663900 | -2.46896700 | 4.67895600  |
| H | -3.59971700 | -3.16395600 | 2.36775800  |
| H | -1.88444000 | -1.88954300 | 6.59814200  |
| C | 4.41271300  | 2.11235400  | -1.48007300 |
| C | 3.55033400  | 2.85905700  | -2.32129800 |
| C | 5.05519800  | 2.73490200  | -0.37964700 |
| C | 2.84553400  | 2.28164200  | -3.42641000 |
| C | 3.34407900  | 4.26593400  | -2.05998600 |
| C | 4.80896600  | 4.13437500  | -0.11134100 |
| C | 2.04108400  | 3.04134900  | -4.23396100 |
| H | 2.92660300  | 1.21634900  | -3.60334500 |
| C | 2.50157000  | 5.02444600  | -2.93182700 |
| C | 3.96847300  | 4.86007400  | -0.96032300 |
| C | 1.87560100  | 4.43517000  | -3.99647600 |
| H | 1.50462300  | 2.57060100  | -5.05266300 |
| H | 2.36728100  | 6.08298200  | -2.72328800 |
| H | 3.80023800  | 5.91667800  | -0.76258000 |
| H | 1.23841500  | 5.02130500  | -4.65305900 |
| C | -0.94155700 | -4.82236500 | -1.31356500 |
| H | -0.54564000 | -5.26662400 | -2.22301000 |
| C | -0.08671300 | -4.47234600 | -0.30134400 |
| H | 0.97609800  | -4.65338000 | -0.41566300 |
| C | -2.34295100 | -4.60887200 | -1.19302400 |
| H | -3.00484400 | -4.86107100 | -2.01433100 |
| C | -2.85193100 | -4.08418600 | -0.03591600 |
| H | -3.92143400 | -3.92717500 | 0.07244400  |
| C | 6.57394500  | 2.68733900  | 1.53758200  |
| H | 7.26903500  | 2.14194400  | 2.17044300  |
| C | 6.30272000  | 4.05735800  | 1.81419800  |
| H | 6.78373300  | 4.54272200  | 2.65889200  |
| C | 5.44808600  | 4.75714700  | 1.00662200  |
| H | 5.24079900  | 5.80773900  | 1.19558600  |
| C | 5.97559800  | 2.05254400  | 0.48048800  |
| H | 6.21064400  | 1.01324000  | 0.28079300  |
| C | -1.61452500 | 2.68069000  | 5.60699000  |
| H | -0.74370100 | 2.48402100  | 6.24353800  |

|   |             |            |            |
|---|-------------|------------|------------|
| H | -1.96195200 | 3.69950400 | 5.82196000 |
| H | -2.41021400 | 1.98673800 | 5.89848800 |
| C | -0.89267600 | 1.04505500 | 3.84722500 |
| H | -0.03419000 | 0.74210900 | 4.45771400 |
| H | -1.72581600 | 0.38129000 | 4.09652600 |
| H | -0.64666200 | 0.86481300 | 2.79718400 |

TS-EF-1S

1 imaginary frequencies

H = -5198.729113

G = -5198.921647

E(M06-2X-DCM) = -5199.563207

|   |            |             |             |
|---|------------|-------------|-------------|
| O | 2.20192100 | -2.02064900 | -0.27462500 |
| O | 3.23761300 | 0.28281200  | 0.29518800  |
| P | 1.79967000 | -0.46479600 | 0.06175100  |
| O | 1.03108200 | -0.33342400 | 1.34066000  |
| C | 4.14770200 | -4.16406700 | 2.75393400  |
| C | 4.86476000 | -3.34387100 | 1.88934700  |
| C | 4.22217400 | -2.68984900 | 0.82742200  |
| C | 2.08496500 | -3.61962800 | 1.55186900  |
| C | 2.77576000 | -4.31840900 | 2.55721300  |
| C | 4.18858100 | 0.31387400  | -0.72464000 |
| C | 5.01096600 | -0.79397500 | -0.93156500 |
| C | 5.85739100 | -0.81688100 | -2.05181500 |
| C | 5.97054000 | 0.29300700  | -2.88140400 |
| C | 5.22858100 | 1.43555800  | -2.58582000 |
| C | 4.31483700 | 1.47087300  | -1.51915600 |
| H | 2.20759000 | -4.97562200 | 3.20899600  |
| H | 5.33197100 | 2.32227900  | -3.20415900 |
| C | 5.25812400 | -2.03876600 | -0.08208800 |
| C | 6.41374300 | -1.79661300 | 0.94786200  |
| H | 6.20599800 | -0.87114700 | 1.49744000  |
| H | 7.38902300 | -1.68537400 | 0.46392400  |
| H | 7.60353000 | -2.09464600 | -1.88830400 |
| H | 6.52058800 | -2.54817900 | -3.19987900 |
| C | 2.83634100 | -2.77808500 | 0.70829300  |
| H | 4.64431500 | -4.68322400 | 3.56994600  |
| H | 6.63198100 | 0.27849200  | -3.74401700 |
| C | 6.33866300 | -3.00166600 | 1.91045900  |
| H | 6.69987900 | -2.76228900 | 2.91730600  |
| H | 6.94883700 | -3.84145400 | 1.54920000  |
| C | 6.54449400 | -2.15940200 | -2.17541300 |
| C | 5.74509000 | -3.03511600 | -1.18730700 |
| H | 4.86751900 | -3.45570100 | -1.69142000 |

|   |              |              |              |
|---|--------------|--------------|--------------|
| H | 6. 32433400  | -3. 86684700 | -0. 77426000 |
| C | 3. 56157500  | 2. 73774000  | -1. 26044800 |
| C | 2. 66070000  | 3. 23410200  | -2. 23490400 |
| C | 3. 83699900  | 3. 49790000  | -0. 09568300 |
| C | 2. 31013900  | 2. 49707900  | -3. 41183000 |
| C | 2. 04605900  | 4. 52929400  | -2. 04811500 |
| C | 3. 18453000  | 4. 77423400  | 0. 09594500  |
| C | 1. 45981400  | 3. 01702600  | -4. 35123000 |
| H | 2. 69772800  | 1. 49413700  | -3. 53503100 |
| C | 1. 17356700  | 5. 04133600  | -3. 05954000 |
| C | 2. 31497400  | 5. 25724600  | -0. 88620700 |
| C | 0. 89531700  | 4. 31364300  | -4. 18490100 |
| H | 1. 19357400  | 2. 42350300  | -5. 22091600 |
| H | 0. 73396100  | 6. 02473900  | -2. 90938600 |
| H | 1. 84634900  | 6. 23005500  | -0. 74878700 |
| H | 0. 23146000  | 4. 71331500  | -4. 94714500 |
| C | 0. 60811000  | -3. 81365100 | 1. 41490700  |
| C | -0. 25126300 | -3. 42127000 | 2. 47143700  |
| C | 0. 07944900  | -4. 46544400 | 0. 27320500  |
| C | 0. 21447700  | -2. 73306400 | 3. 63925300  |
| C | -1. 66469400 | -3. 71253600 | 2. 38903800  |
| C | -1. 34161400 | -4. 71518100 | 0. 18703100  |
| C | -0. 63815000 | -2. 40196200 | 4. 66107300  |
| H | 1. 26207100  | -2. 46469400 | 3. 70216000  |
| C | -2. 52089000 | -3. 34323100 | 3. 47428400  |
| C | -2. 17110500 | -4. 34752500 | 1. 25105000  |
| C | -2. 02615200 | -2. 71365000 | 4. 58433100  |
| H | -0. 25294700 | -1. 89356600 | 5. 54174200  |
| H | -3. 57996700 | -3. 57737800 | 3. 39573100  |
| H | -3. 23650000 | -4. 55931800 | 1. 18915400  |
| H | -2. 68726000 | -2. 44245200 | 5. 40280600  |
| C | 5. 02367400  | 3. 84079600  | 2. 01685100  |
| H | 5. 74256300  | 3. 49679700  | 2. 75573200  |
| C | 4. 77230800  | 3. 07920700  | 0. 90516400  |
| H | 5. 29754800  | 2. 14099500  | 0. 76960600  |
| C | 4. 35814300  | 5. 08491900  | 2. 21226700  |
| H | 4. 57281300  | 5. 67855000  | 3. 09716400  |
| C | 3. 46729400  | 5. 53472200  | 1. 27456600  |
| H | 2. 96734300  | 6. 49304900  | 1. 39887500  |
| C | 0. 35059500  | -5. 54076800 | -1. 90368000 |
| H | 0. 99556000  | -5. 87258600 | -2. 71290800 |
| C | -1. 05432500 | -5. 74996800 | -1. 99808900 |
| H | -1. 46956100 | -6. 22803100 | -2. 88106100 |
| C | -1. 87441800 | -5. 35156800 | -0. 97797100 |



|   |             |             |             |
|---|-------------|-------------|-------------|
| H | -2.94946700 | -5.49781300 | -1.03784400 |
| C | 0.89635800  | -4.92303300 | -0.80936200 |
| H | 1.96867100  | -4.77530200 | -0.75619800 |
| C | 0.19539300  | 2.59315500  | 3.79263400  |
| C | -0.21306700 | 3.62743200  | 2.69158900  |
| H | 0.24108900  | 4.59262100  | 2.97226600  |
| H | 0.29193500  | 3.35878200  | 1.76161500  |
| C | -2.04096200 | 4.21418600  | 0.99346000  |
| C | -1.45200700 | 3.52388500  | -0.09011600 |
| C | -3.07013100 | 5.14388700  | 0.71005200  |
| C | -1.89993500 | 3.72264100  | -1.39327500 |
| H | -0.68070200 | 2.78051900  | 0.07793600  |
| C | -3.49271300 | 5.36396900  | -0.59476200 |
| H | -3.50634100 | 5.72654500  | 1.51509900  |
| C | -2.91761800 | 4.64464900  | -1.64728500 |
| H | -1.46091700 | 3.13487400  | -2.19137200 |
| H | -4.27247900 | 6.09382600  | -0.79236900 |
| H | -3.26369300 | 4.80274900  | -2.66484700 |
| C | -1.65485600 | 3.94273100  | 2.38200300  |
| C | -0.72382400 | 1.33488700  | 3.81781700  |
| H | -1.61276800 | 1.51041500  | 4.42282400  |
| H | -0.16931700 | 0.51512400  | 4.28966600  |
| N | -1.16167700 | 0.86763200  | 2.50324500  |
| C | -2.42499600 | 0.61003700  | 2.13618100  |
| N | -2.59609300 | -0.05631400 | 0.97579100  |
| C | -3.81273300 | -0.27166800 | 0.26790500  |
| C | -4.68334200 | 0.77569800  | -0.04622600 |
| C | -4.07372100 | -1.55930300 | -0.19922800 |
| C | -5.83276300 | 0.51468900  | -0.78909800 |
| C | -5.22534600 | -1.80575400 | -0.94904100 |
| H | -3.37154800 | -2.35649700 | 0.01586000  |
| C | -6.11587700 | -0.77590900 | -1.24232300 |
| H | -7.00769300 | -0.96966100 | -1.82529100 |
| C | -5.46932100 | -3.20359800 | -1.45456300 |
| C | -6.79612000 | 1.63658400  | -1.07342500 |
| F | -4.59263500 | -3.54956200 | -2.42034700 |
| F | -6.71047100 | -3.35411900 | -1.96109800 |
| F | -5.32760700 | -4.12058300 | -0.46102700 |
| F | -7.70880600 | 1.77440400  | -0.08373000 |
| F | -7.48477400 | 1.43087800  | -2.21684200 |
| F | -6.16192900 | 2.82591700  | -1.18801500 |
| S | -3.79663300 | 1.10874800  | 3.09160200  |
| H | -4.45825000 | 1.78520500  | 0.27108400  |
| H | -1.77577900 | -0.45345900 | 0.49555000  |

|   |             |             |             |
|---|-------------|-------------|-------------|
| H | -0.40251200 | 0.45284400  | 1.92870700  |
| C | -2.65044200 | 3.92997000  | 3.36736700  |
| H | -2.35533300 | 3.99386600  | 4.41108100  |
| H | -3.10694500 | 2.68743600  | 3.28312000  |
| H | -3.59813800 | 4.41750200  | 3.14000500  |
| N | 1.22118900  | 0.14521800  | -1.31675100 |
| S | -0.17426900 | -0.25318000 | -1.94928400 |
| O | -0.84405700 | 0.90567500  | -2.55434100 |
| O | -1.00336800 | -1.14471000 | -1.09349100 |
| C | 0.28891700  | -1.32329600 | -3.40953800 |
| F | 1.04086600  | -0.61920600 | -4.26968800 |
| F | -0.81926000 | -1.72494800 | -4.04030500 |
| F | 0.97945300  | -2.39462300 | -3.01326300 |
| C | 1.65037700  | 2.18028300  | 3.47536000  |
| H | 2.29606800  | 3.06192200  | 3.39635500  |
| H | 2.04633000  | 1.54504900  | 4.27669700  |
| H | 1.72515400  | 1.61595300  | 2.54241800  |
| C | 0.19013800  | 3.20170600  | 5.21204600  |
| H | 0.52031500  | 2.45423200  | 5.94317400  |
| H | 0.88698400  | 4.04549400  | 5.27038300  |
| H | -0.79399200 | 3.55500500  | 5.53491800  |

TS-EF-1S-1

l imaginary frequencies

H= -5198.720562

G= -5198.909501

E(M06-2X-DCM) = -5199.563555

|   |            |             |             |
|---|------------|-------------|-------------|
| O | 2.77240800 | -0.37898700 | 0.16802600  |
| O | 1.21569400 | -2.42949700 | -0.24703900 |
| P | 1.18967600 | -0.81095400 | 0.01273000  |
| O | 0.56480400 | -0.46253800 | 1.33711000  |
| C | 5.26499200 | -0.93112900 | -3.15813800 |
| C | 4.89867100 | -2.01097500 | -2.36400200 |
| C | 4.16876500 | -1.81626700 | -1.18164000 |
| C | 4.09933800 | 0.57899800  | -1.62584200 |
| C | 4.90870000 | 0.35251200  | -2.75245800 |
| C | 1.77868700 | -3.27901300 | 0.70548700  |
| C | 3.15266300 | -3.50327600 | 0.67267400  |
| C | 3.74724100 | -4.27675600 | 1.68186500  |
| C | 2.97125000 | -4.88706400 | 2.66090600  |
| C | 1.58725800 | -4.72176000 | 2.62537200  |
| C | 0.96159700 | -3.91260200 | 1.66239200  |
| H | 5.23798300 | 1.21162500  | -3.32899800 |
| H | 0.96362800 | -5.21608700 | 3.36469900  |

|   |              |              |              |
|---|--------------|--------------|--------------|
| C | 4. 19287200  | -3. 10662200 | -0. 36587500 |
| C | 4. 29501500  | -4. 16010300 | -1. 51677000 |
| H | 4. 68608900  | -5. 12224800 | -1. 17030400 |
| H | 3. 29267500  | -4. 32894700 | -1. 92584900 |
| H | 5. 78369700  | -4. 16485500 | 2. 46058900  |
| H | 5. 58327900  | -5. 27018000 | 1. 10471100  |
| C | 3. 67574100  | -0. 54455900 | -0. 88687300 |
| H | 5. 83793600  | -1. 07764900 | -4. 07010500 |
| H | 3. 43022200  | -5. 49182500 | 3. 43905800  |
| C | 5. 18544200  | -3. 48117000 | -2. 58081400 |
| H | 6. 24860100  | -3. 71178000 | -2. 42402700 |
| H | 4. 94057000  | -3. 80251100 | -3. 59944100 |
| C | 5. 24979600  | -4. 30598600 | 1. 51371600  |
| C | 5. 49164600  | -3. 15750700 | 0. 51326400  |
| H | 6. 39716300  | -3. 28453100 | -0. 08742000 |
| H | 5. 58318300  | -2. 20981000 | 1. 05693000  |
| C | -0. 53090700 | -3. 80700900 | 1. 67219900  |
| C | -1. 28444600 | -4. 47522900 | 0. 67581000  |
| C | -1. 18755700 | -3. 13514700 | 2. 73135500  |
| C | -0. 67792300 | -5. 22533000 | -0. 38168600 |
| C | -2. 72854200 | -4. 43903200 | 0. 72786900  |
| C | -2. 63245900 | -3. 12631100 | 2. 78512900  |
| C | -1. 43573400 | -5. 86668600 | -1. 32566400 |
| H | 0. 40318000  | -5. 28280400 | -0. 43053400 |
| C | -3. 48283700 | -5. 10807600 | -0. 28649100 |
| C | -3. 36229200 | -3. 76739000 | 1. 77891800  |
| C | -2. 85708700 | -5. 80289500 | -1. 28537900 |
| H | -0. 94820100 | -6. 42572700 | -2. 11957500 |
| H | -4. 56628800 | -5. 04279400 | -0. 24819900 |
| H | -4. 44925400 | -3. 74661400 | 1. 81458800  |
| H | -3. 44026800 | -6. 30710400 | -2. 05097700 |
| C | 3. 81207900  | 1. 99647600  | -1. 23896600 |
| C | 4. 38196800  | 2. 52943700  | -0. 05329000 |
| C | 3. 11129500  | 2. 84785400  | -2. 13080700 |
| C | 5. 16918600  | 1. 74773700  | 0. 85342800  |
| C | 4. 22333800  | 3. 93540000  | 0. 24854100  |
| C | 2. 98572200  | 4. 25716700  | -1. 82900600 |
| C | 5. 73485900  | 2. 29827700  | 1. 97423900  |
| H | 5. 33178400  | 0. 69937000  | 0. 63309000  |
| C | 4. 81725100  | 4. 46843800  | 1. 43659200  |
| C | 3. 53110500  | 4. 75829800  | -0. 64436100 |
| C | 5. 55356400  | 3. 67801200  | 2. 27829900  |
| H | 6. 33476400  | 1. 67898800  | 2. 63581300  |
| H | 4. 68904300  | 5. 52916600  | 1. 64236500  |

|   |             |             |             |
|---|-------------|-------------|-------------|
| H | 3.43619500  | 5.82005000  | -0.42371700 |
| H | 6.01397500  | 4.10000300  | 3.16796500  |
| C | -1.14578100 | -1.84149800 | 4.80492700  |
| H | -0.58316100 | -1.34811900 | 5.59395800  |
| C | -0.47982500 | -2.45365200 | 3.77477900  |
| H | 0.60241500  | -2.42369300 | 3.73406300  |
| C | -2.56981000 | -1.84423000 | 4.85847000  |
| H | -3.08016500 | -1.35138900 | 5.68143700  |
| C | -3.28746700 | -2.46277600 | 3.87065700  |
| H | -4.37463800 | -2.46759700 | 3.89526300  |
| C | 1.87415600  | 3.22637900  | -4.20307200 |
| H | 1.41354500  | 2.83008400  | -5.10303000 |
| C | 1.78595500  | 4.61832700  | -3.91799100 |
| H | 1.28410800  | 5.28093300  | -4.61839200 |
| C | 2.31851200  | 5.11441000  | -2.75872200 |
| H | 2.24573000  | 6.17325700  | -2.52094300 |
| C | 2.51257100  | 2.37166200  | -3.34217700 |
| H | 2.54873800  | 1.31298000  | -3.56888100 |
| N | 0.44076300  | -0.14333500 | -1.22912600 |
| S | 0.30455200  | -0.51319400 | -2.77619300 |
| C | -0.85007500 | -2.00181000 | -2.82635500 |
| O | 1.53780100  | -0.99556500 | -3.41805300 |
| O | -0.46290400 | 0.55276600  | -3.43596600 |
| F | -0.15958900 | -3.13747800 | -2.69669700 |
| F | -1.76142600 | -1.93548300 | -1.84137500 |
| F | -1.48987000 | -2.01977500 | -3.99988900 |
| C | 1.00919500  | 2.84211300  | 3.90795000  |
| C | 0.88724800  | 3.74992500  | 2.63419300  |
| H | 1.55264900  | 4.61454600  | 2.78785600  |
| H | 1.33024700  | 3.22203600  | 1.78831000  |
| C | -0.75896500 | 4.37124000  | 0.76415300  |
| C | -0.35918300 | 3.33662900  | -0.11282700 |
| C | -1.55983900 | 5.41406400  | 0.24037600  |
| C | -0.78101400 | 3.31739800  | -1.43958300 |
| H | 0.22464200  | 2.49746600  | 0.24773200  |
| C | -1.95501200 | 5.40871100  | -1.09167900 |
| H | -1.83861500 | 6.25014500  | 0.87412500  |
| C | -1.57775300 | 4.35462600  | -1.93025300 |
| H | -0.50226800 | 2.48483400  | -2.07843300 |
| H | -2.56187400 | 6.22320400  | -1.47635900 |
| H | -1.90987300 | 4.33624300  | -2.96358700 |
| C | -0.43794300 | 4.33019000  | 2.19617900  |
| C | -0.23821900 | 1.94207000  | 4.12779400  |
| H | -1.05079500 | 2.48573400  | 4.60746400  |

|   |             |             |             |
|---|-------------|-------------|-------------|
| H | 0.04205600  | 1.12352700  | 4.80341500  |
| N | -0.74022100 | 1.35914700  | 2.89216000  |
| C | -1.99459000 | 1.37090800  | 2.43189000  |
| N | -2.22898400 | 0.58566200  | 1.35720800  |
| C | -3.33458100 | 0.63111300  | 0.46124100  |
| C | -3.82856900 | 1.84263800  | -0.03539800 |
| C | -3.87335000 | -0.57508100 | 0.01597800  |
| C | -4.87749400 | 1.83526900  | -0.95012200 |
| C | -4.91866700 | -0.56693500 | -0.91161500 |
| H | -3.48022300 | -1.51381000 | 0.39106400  |
| C | -5.43271900 | 0.63273200  | -1.39396600 |
| H | -6.24979900 | 0.63385400  | -2.10447000 |
| C | -5.47585300 | -1.88597700 | -1.38073300 |
| C | -5.36132300 | 3.13848500  | -1.53064600 |
| F | -4.55666000 | -2.60239200 | -2.05688300 |
| F | -6.54646100 | -1.73020900 | -2.18656900 |
| F | -5.87435100 | -2.65263300 | -0.33127500 |
| F | -5.21352600 | 4.16392800  | -0.66254800 |
| F | -6.66629700 | 3.07950000  | -1.87369000 |
| F | -4.67591400 | 3.47208700  | -2.65000400 |
| S | -3.24948900 | 2.33390400  | 3.16472100  |
| H | -3.39547200 | 2.78055800  | 0.28276900  |
| H | -1.44788500 | -0.02551900 | 1.09051300  |
| H | -0.09046600 | 0.74022500  | 2.37567500  |
| C | -1.39521100 | 4.76759800  | 3.11241600  |
| H | -1.10378900 | 4.93980400  | 4.14515500  |
| H | -2.20755200 | 3.65557600  | 3.20126600  |
| H | -2.19632100 | 5.41374100  | 2.75503800  |
| C | 2.25205700  | 1.94932300  | 3.69361700  |
| H | 3.13793900  | 2.55930900  | 3.48994900  |
| H | 2.45301300  | 1.35228200  | 4.59144000  |
| H | 2.12759800  | 1.26060500  | 2.85078100  |
| C | 1.22945400  | 3.66439400  | 5.19457700  |
| H | 1.32144500  | 3.00048900  | 6.06256800  |
| H | 2.15683000  | 4.24369800  | 5.12502400  |
| H | 0.41239600  | 4.36283600  | 5.40292800  |

TS-EF-1S-2

1 imaginary frequencies

H = -5198.726621

G = -5198.918062

E(M06-2X-DCM) = -5199.560199

|   |            |             |             |
|---|------------|-------------|-------------|
| 0 | 1.98619700 | -2.31294300 | -0.31419600 |
| 0 | 3.16569000 | -0.04724900 | 0.13369600  |

|   |             |              |              |
|---|-------------|--------------|--------------|
| P | 1. 69552900 | -0. 70116900 | -0. 20037000 |
| O | 0. 80066100 | -0. 35810700 | 0. 94950700  |
| C | 3. 78258500 | -4. 33907000 | 2. 88459900  |
| C | 4. 55400500 | -3. 66162000 | 1. 94654300  |
| C | 3. 95481500 | -3. 03261000 | 0. 84454800  |
| C | 1. 75833300 | -3. 71470500 | 1. 65876300  |
| C | 2. 39918800 | -4. 38205500 | 2. 71643900  |
| C | 4. 18161800 | -0. 10752000 | -0. 82172100 |
| C | 4. 88631300 | -1. 29653100 | -1. 00485300 |
| C | 5. 73792300 | -1. 42332800 | -2. 11323600 |
| C | 5. 98949400 | -0. 33519100 | -2. 94185100 |
| C | 5. 40322700 | 0. 89382500  | -2. 63863500 |
| C | 4. 48645200 | 1. 03758800  | -1. 58399700 |
| H | 1. 78513100 | -4. 93116000 | 3. 42443500  |
| H | 5. 63888300 | 1. 76812300  | -3. 23828300 |
| C | 5. 02517700 | -2. 53013900 | -0. 11710200 |
| C | 6. 22207300 | -2. 34173700 | 0. 87959100  |
| H | 6. 11605800 | -1. 36872900 | 1. 37352900  |
| H | 7. 19239000 | -2. 35413600 | 0. 37397000  |
| H | 7. 33794100 | -2. 88180800 | -1. 94883700 |
| H | 6. 18452800 | -3. 24318900 | -3. 22789300 |
| C | 2. 56478000 | -3. 01040000 | 0. 74208500  |
| H | 4. 24618300 | -4. 83540100 | 3. 73353200  |
| H | 6. 65082200 | -0. 42827300 | -3. 79959800 |
| C | 6. 05395200 | -3. 46967600 | 1. 91829000  |
| H | 6. 46474100 | -3. 20732800 | 2. 90009000  |
| H | 6. 56564600 | -4. 38837400 | 1. 59820500  |
| C | 6. 27227100 | -2. 83673300 | -2. 21378000 |
| C | 5. 40271900 | -3. 60283600 | -1. 19076900 |
| H | 4. 48418900 | -3. 95538800 | -1. 67333500 |
| H | 5. 90778000 | -4. 47100200 | -0. 75526600 |
| C | 3. 95992000 | 2. 40282000  | -1. 26365600 |
| C | 3. 13679800 | 3. 09258300  | -2. 18744100 |
| C | 4. 40532200 | 3. 05634500  | -0. 08541200 |
| C | 2. 64052800 | 2. 48270200  | -3. 38345000 |
| C | 2. 76520600 | 4. 46735400  | -1. 93010500 |
| C | 4. 00127600 | 4. 42101500  | 0. 17264500  |
| C | 1. 87480400 | 3. 18680500  | -4. 27562100 |
| H | 2. 84407900 | 1. 43434000  | -3. 56052600 |
| C | 1. 97004600 | 5. 16745400  | -2. 89009000 |
| C | 3. 19668500 | 5. 08813000  | -0. 75515000 |
| C | 1. 54617800 | 4. 55090800  | -4. 03661600 |
| H | 1. 48891400 | 2. 68661300  | -5. 15800700 |
| H | 1. 71095600 | 6. 20389100  | -2. 68607300 |

|   |             |             |             |
|---|-------------|-------------|-------------|
| H | 2.91549300  | 6.12291600  | -0.56742400 |
| H | 0.94453800  | 5.09411000  | -4.76085600 |
| C | 0.27074900  | -3.81279900 | 1.53448400  |
| C | -0.56170800 | -3.22058700 | 2.51531400  |
| C | -0.29835600 | -4.56964600 | 0.48159100  |
| C | -0.04768600 | -2.45136100 | 3.60956100  |
| C | -1.99531600 | -3.38532400 | 2.42977200  |
| C | -1.73483800 | -4.70243100 | 0.39194500  |
| C | -0.87914300 | -1.92285000 | 4.56329800  |
| H | 1.02187200  | -2.29021100 | 3.67510800  |
| C | -2.82798700 | -2.80293300 | 3.43696900  |
| C | -2.54327000 | -4.11004000 | 1.36695100  |
| C | -2.29060700 | -2.09892600 | 4.48070000  |
| H | -0.45946700 | -1.36151200 | 5.39459200  |
| H | -3.90377500 | -2.94024800 | 3.35662600  |
| H | -3.62351600 | -4.21207600 | 1.29251000  |
| H | -2.93415000 | -1.66889800 | 5.24308000  |
| C | 5.71120400  | 3.10484300  | 1.98497300  |
| H | 6.38234700  | 2.61049900  | 2.68230600  |
| C | 5.28488200  | 2.44120600  | 0.86380800  |
| H | 5.62746700  | 1.42976400  | 0.67930400  |
| C | 5.29094100  | 4.44059100  | 2.24409300  |
| H | 5.64165200  | 4.95365300  | 3.13579500  |
| C | 4.46117600  | 5.07572500  | 1.35909200  |
| H | 4.14747600  | 6.10308400  | 1.53218200  |
| C | -0.09173000 | -5.94038300 | -1.52991000 |
| H | 0.53223900  | -6.42987800 | -2.27286700 |
| C | -1.50854500 | -6.04188600 | -1.62930500 |
| H | -1.95190600 | -6.59864400 | -2.45035100 |
| C | -2.30459700 | -5.44198300 | -0.69196100 |
| H | -3.38696200 | -5.50446500 | -0.75789900 |
| C | 0.49096200  | -5.23140900 | -0.51270400 |
| H | 1.57130600  | -5.16746400 | -0.45239300 |
| C | 0.59926500  | 2.84262500  | 3.40663400  |
| C | 0.22073900  | 3.86267700  | 2.28420500  |
| H | 0.76999600  | 4.79580000  | 2.49244200  |
| H | 0.64375600  | 3.51151900  | 1.34082200  |
| C | -1.61866800 | 4.53886400  | 0.64465200  |
| C | -1.17212300 | 3.71991600  | -0.41463300 |
| C | -2.50643300 | 5.59703400  | 0.34409700  |
| C | -1.61499900 | 3.93241600  | -1.71709200 |
| H | -0.53143000 | 2.86689100  | -0.22619300 |
| C | -2.91977000 | 5.82740700  | -0.96292300 |
| H | -2.83209600 | 6.26742900  | 1.13360000  |

|   |             |             |             |
|---|-------------|-------------|-------------|
| C | -2.48141600 | 4.99132200  | -1.99503800 |
| H | -1.28437400 | 3.25883800  | -2.50074300 |
| H | -3.58406700 | 6.65942000  | -1.17870000 |
| H | -2.81782400 | 5.16495500  | -3.01340300 |
| C | -1.20704800 | 4.28659400  | 2.03335200  |
| C | -0.44583300 | 1.70134300  | 3.55586400  |
| H | -1.26806100 | 2.00113400  | 4.20394000  |
| H | 0.04332900  | 0.84395200  | 4.03309000  |
| N | -1.01307600 | 1.23419500  | 2.29255700  |
| C | -2.31528100 | 1.07329100  | 2.02230500  |
| N | -2.60567300 | 0.41989800  | 0.88147600  |
| C | -3.86207900 | 0.13590100  | 0.27993700  |
| C | -4.90679100 | 1.06257600  | 0.19752100  |
| C | -3.99477400 | -1.11542200 | -0.32727800 |
| C | -6.09015400 | 0.70770400  | -0.44764800 |
| C | -5.18196200 | -1.45127000 | -0.97929800 |
| H | -3.17206000 | -1.82046600 | -0.29166000 |
| C | -6.24174900 | -0.54972500 | -1.03498500 |
| H | -7.16584800 | -0.81640600 | -1.53294200 |
| C | -5.31136600 | -2.82624200 | -1.58140600 |
| C | -7.19352600 | 1.72474300  | -0.58514800 |
| F | -4.21613700 | -3.16677700 | -2.28853800 |
| F | -6.37907800 | -2.92604500 | -2.39874700 |
| F | -5.46282300 | -3.77579500 | -0.61756300 |
| F | -7.17501100 | 2.62821000  | 0.41875100  |
| F | -8.41181300 | 1.14061700  | -0.58658500 |
| F | -7.08914400 | 2.41849300  | -1.74191500 |
| S | -3.55671400 | 1.71019300  | 3.07464500  |
| H | -4.80077200 | 2.04706600  | 0.62989900  |
| H | -1.80877400 | 0.15121800  | 0.28967400  |
| H | -0.34574400 | 0.72115700  | 1.68575100  |
| C | -2.14683400 | 4.42457200  | 3.05517000  |
| H | -1.80421000 | 4.50470200  | 4.08359200  |
| H | -2.74893600 | 3.19145300  | 3.08499800  |
| H | -3.06181800 | 4.97487400  | 2.83685100  |
| N | 1.34634200  | -0.30294400 | -1.72476200 |
| S | -0.08086500 | -0.03300500 | -2.33988800 |
| O | 0.01879400  | 0.57284100  | -3.66847000 |
| O | -1.05673300 | 0.58089100  | -1.39622300 |
| C | -0.82443700 | -1.72130300 | -2.64332400 |
| F | -0.03453000 | -2.46835300 | -3.41279500 |
| F | -2.01921600 | -1.59418800 | -3.23224700 |
| F | -0.99885500 | -2.34625600 | -1.46213700 |
| C | 1.96959200  | 2.24691200  | 3.01581100  |



|   |             |            |            |
|---|-------------|------------|------------|
| H | 2.70851100  | 3.03905000 | 2.85644300 |
| H | 2.34308900  | 1.59851200 | 3.81738500 |
| H | 1.91398100  | 1.64478300 | 2.10449200 |
| C | 0.75795400  | 3.51631000 | 4.78640700 |
| H | 1.03591600  | 2.77243400 | 5.54263800 |
| H | 1.55613100  | 4.26649100 | 4.75679000 |
| H | -0.15456900 | 4.00969500 | 5.13641200 |

TS-EF-1S-3

l imaginary frequencies

H = -5198.729379

G = -5198.920227

E(M06-2X-DCM) = -5199.561272

|   |            |             |             |
|---|------------|-------------|-------------|
| O | 1.40983300 | -2.56809400 | -0.49846400 |
| O | 3.09534000 | -0.74792800 | 0.25759700  |
| P | 1.53678300 | -0.95757800 | -0.21467600 |
| O | 0.67572600 | -0.50229700 | 0.92020700  |
| C | 2.37902600 | -5.29347000 | 2.53326000  |
| C | 3.36668500 | -4.75840900 | 1.71342200  |
| C | 3.03324000 | -3.89024100 | 0.66291000  |
| C | 0.68015300 | -4.03666000 | 1.29577200  |
| C | 1.04874600 | -4.94949100 | 2.29982300  |
| C | 4.12894500 | -0.98108700 | -0.65126700 |
| C | 4.51768600 | -2.29019100 | -0.93184300 |
| C | 5.38981300 | -2.52927400 | -2.00515600 |
| C | 5.97331000 | -1.47101200 | -2.69336900 |
| C | 5.69686900 | -0.16590000 | -2.28566000 |
| C | 4.76843900 | 0.11203600  | -1.26851000 |
| H | 0.26386800 | -5.38002600 | 2.91472200  |
| H | 6.19083300 | 0.66906700  | -2.77378400 |
| C | 4.26646800 | -3.59683700 | -0.18406800 |
| C | 5.39289100 | -3.82863300 | 0.88315100  |
| H | 5.50294400 | -2.91533900 | 1.47956500  |
| H | 6.36290700 | -4.04626600 | 0.42600800  |
| H | 6.54412100 | -4.36677000 | -1.92844600 |
| H | 5.43894800 | -4.28593100 | -3.29557900 |
| C | 1.70725300 | -3.49098300 | 0.50015500  |
| H | 2.63403000 | -5.97478900 | 3.34117100  |
| H | 6.65274300 | -1.65188200 | -3.52246800 |
| C | 4.86292700 | -4.96847700 | 1.77686700  |
| H | 5.25289700 | -4.92200300 | 2.80021400  |
| H | 5.14286300 | -5.95365100 | 1.37763700  |
| C | 5.54956100 | -4.01694000 | -2.23882900 |
| C | 4.43614100 | -4.62162300 | -1.35325900 |

|   |              |              |              |
|---|--------------|--------------|--------------|
| H | 3. 49774700  | -4. 67037900 | -1. 91710900 |
| H | 4. 66552300  | -5. 63047900 | -0. 99550500 |
| C | 4. 57334200  | 1. 53209300  | -0. 83415500 |
| C | 4. 03630800  | 2. 48964800  | -1. 72987500 |
| C | 5. 05723000  | 1. 94236700  | 0. 43522900  |
| C | 3. 51087600  | 2. 13626300  | -3. 01366800 |
| C | 4. 00028500  | 3. 88581000  | -1. 35106000 |
| C | 4. 98811100  | 3. 33742700  | 0. 81098900  |
| C | 3. 02927000  | 3. 08964000  | -3. 87235900 |
| H | 3. 45918200  | 1. 09070700  | -3. 28928800 |
| C | 3. 49606200  | 4. 84908800  | -2. 27951100 |
| C | 4. 46625000  | 4. 26874900  | -0. 09083200 |
| C | 3. 03475100  | 4. 46615000  | -3. 51034100 |
| H | 2. 61072700  | 2. 78544400  | -4. 82637100 |
| H | 3. 48915900  | 5. 89538600  | -1. 98257500 |
| H | 4. 43934600  | 5. 32072800  | 0. 18796800  |
| H | 2. 65690800  | 5. 20788600  | -4. 20936500 |
| C | -0. 77237100 | -3. 72965600 | 1. 10888800  |
| C | -1. 49499900 | -3. 09432500 | 2. 14911100  |
| C | -1. 44788500 | -4. 17181900 | -0. 05528900 |
| C | -0. 86842600 | -2. 59002000 | 3. 33550500  |
| C | -2. 92643100 | -2. 93235900 | 2. 03141200  |
| C | -2. 87286700 | -3. 96093700 | -0. 17796800 |
| C | -1. 60158000 | -2. 01817900 | 4. 34367200  |
| H | 0. 20915200  | -2. 66141400 | 3. 42497400  |
| C | -3. 65618400 | -2. 33875900 | 3. 11067300  |
| C | -3. 57520200 | -3. 35955300 | 0. 86976900  |
| C | -3. 01743400 | -1. 89753900 | 4. 23867500  |
| H | -1. 09972700 | -1. 65582400 | 5. 23761000  |
| H | -4. 73561200 | -2. 25311100 | 3. 01161400  |
| H | -4. 64925300 | -3. 21387900 | 0. 77848000  |
| H | -3. 58339400 | -1. 45305200 | 5. 05279200  |
| C | 6. 13264800  | 1. 46966900  | 2. 58320400  |
| H | 6. 58807200  | 0. 75894400  | 3. 26768200  |
| C | 5. 66008100  | 1. 03968800  | 1. 37044100  |
| H | 5. 75200600  | -0. 00620800 | 1. 10217000  |
| C | 6. 04200700  | 2. 84126300  | 2. 95506400  |
| H | 6. 42594100  | 3. 16599400  | 3. 91863800  |
| C | 5. 48658800  | 3. 74482300  | 2. 08902400  |
| H | 5. 42805600  | 4. 79952900  | 2. 34977500  |
| C | -1. 46294000 | -5. 23749300 | -2. 25446100 |
| H | -0. 93031800 | -5. 73712100 | -3. 05911700 |
| C | -2. 86166700 | -5. 00312800 | -2. 38077600 |
| H | -3. 38200300 | -5. 32004500 | -3. 28048600 |

|   |             |             |             |
|---|-------------|-------------|-------------|
| C | -3.54362600 | -4.38828700 | -1.36636400 |
| H | -4.61405300 | -4.21277100 | -1.44293000 |
| C | -0.78406500 | -4.84283900 | -1.13174100 |
| H | 0.27892900  | -5.03783400 | -1.05263600 |
| C | 0.95107300  | 2.52528900  | 3.61635700  |
| C | 0.90323400  | 3.65574700  | 2.54067700  |
| H | 1.64858800  | 4.41538100  | 2.83102800  |
| H | 1.29172900  | 3.25646300  | 1.60100000  |
| C | -0.53790500 | 4.93024300  | 0.86781000  |
| C | -0.17551600 | 4.15073600  | -0.25126500 |
| C | -1.11401200 | 6.20141300  | 0.64167300  |
| C | -0.40244200 | 4.61245100  | -1.54468000 |
| H | 0.21645600  | 3.14832900  | -0.12971200 |
| C | -1.30643000 | 6.67306700  | -0.65120000 |
| H | -1.36461600 | 6.83689100  | 1.48553200  |
| C | -0.95819500 | 5.87685100  | -1.74749300 |
| H | -0.14831900 | 3.97176700  | -2.38265600 |
| H | -1.72795700 | 7.66216200  | -0.80644400 |
| H | -1.12339300 | 6.24244000  | -2.75722700 |
| C | -0.35422800 | 4.43341300  | 2.23732700  |
| C | -0.32888400 | 1.64493600  | 3.62121100  |
| H | -1.12495100 | 2.10269700  | 4.20671100  |
| H | -0.08648800 | 0.68965300  | 4.10354400  |
| N | -0.86285500 | 1.33920200  | 2.29570600  |
| C | -2.13865800 | 1.46548100  | 1.91075500  |
| N | -2.44916400 | 0.93525700  | 0.70857500  |
| C | -3.73111400 | 0.80437200  | 0.12294200  |
| C | -3.88078600 | 1.11177200  | -1.23381700 |
| C | -4.80938600 | 0.29039300  | 0.84541500  |
| C | -5.11228800 | 0.90721100  | -1.85400700 |
| C | -6.03747000 | 0.10068400  | 0.21179600  |
| H | -4.68078000 | 0.00751700  | 1.88292000  |
| C | -6.20071300 | 0.40610400  | -1.13828600 |
| H | -7.15557900 | 0.25349000  | -1.62519200 |
| C | -7.16080200 | -0.50107400 | 1.01212900  |
| C | -5.24158100 | 1.17885400  | -3.33131600 |
| F | -6.85889400 | -1.77001700 | 1.40503500  |
| F | -8.31269400 | -0.56656600 | 0.31709300  |
| F | -7.40143900 | 0.19734500  | 2.14197400  |
| F | -4.52154000 | 2.25751300  | -3.70458900 |
| F | -6.52668800 | 1.40289000  | -3.68779000 |
| F | -4.80237600 | 0.13428900  | -4.06635800 |
| S | -3.31459500 | 2.35383200  | 2.84807900  |
| H | -3.03467500 | 1.49832900  | -1.79018400 |

|   |             |             |             |
|---|-------------|-------------|-------------|
| H | -1.66463700 | 0.70394500  | 0.08496000  |
| H | -0.27174100 | 0.71204000  | 1.71930100  |
| C | -1.35098200 | 4.67519100  | 3.18713400  |
| H | -1.10813300 | 4.58035700  | 4.24256200  |
| H | -2.18280300 | 3.62625900  | 3.03514200  |
| H | -2.08887400 | 5.44478600  | 2.96090400  |
| N | 1.41683000  | -0.34479900 | -1.70375100 |
| S | 0.17673800  | 0.36613200  | -2.36033800 |
| O | 0.52810000  | 0.98042800  | -3.64087500 |
| O | -0.62680100 | 1.20278900  | -1.41694400 |
| C | -1.03264900 | -0.99410200 | -2.79641400 |
| F | -0.44888200 | -1.94970600 | -3.51685300 |
| F | -2.05549800 | -0.48089000 | -3.49498500 |
| F | -1.52081900 | -1.53215700 | -1.66471000 |
| C | 2.17947600  | 1.65061500  | 3.28003300  |
| H | 3.08861200  | 2.25828200  | 3.22203600  |
| H | 2.33224100  | 0.89642500  | 4.06118700  |
| H | 2.06270200  | 1.12166400  | 2.32964700  |
| C | 1.14759700  | 3.07882900  | 5.04390900  |
| H | 1.18821400  | 2.25658900  | 5.76825000  |
| H | 2.09521700  | 3.62444200  | 5.11526900  |
| H | 0.34707100  | 3.75392700  | 5.36306500  |

TS-EF-1S-4

1 imaginary frequencies

H = -5198.723515

G = -5198.913607

E(M06-2X-DCM) = -5199.557805

|   |             |             |             |
|---|-------------|-------------|-------------|
| O | -1.94142700 | 2.30568100  | -0.27055500 |
| O | -3.18815700 | 0.07869200  | 0.19682300  |
| P | -1.69754900 | 0.68436900  | -0.14679400 |
| O | -0.81520200 | 0.33241500  | 1.01073600  |
| C | -3.59141000 | 4.37701100  | 2.97902300  |
| C | -4.40671600 | 3.72347600  | 2.06137400  |
| C | -3.85520900 | 3.08359300  | 0.94111800  |
| C | -1.62029000 | 3.70781200  | 1.69090400  |
| C | -2.21315900 | 4.38738300  | 2.76875700  |
| C | -4.21192000 | 0.18324900  | -0.74479600 |
| C | -4.88351000 | 1.39568600  | -0.90047900 |
| C | -5.75208000 | 1.56387700  | -1.98998500 |
| C | -6.05115600 | 0.49654000  | -2.82953700 |
| C | -5.49492700 | -0.75258100 | -2.55566100 |
| C | -4.56437100 | -0.93991800 | -1.51952200 |
| H | -1.56506500 | 4.92047400  | 3.45841900  |

|   |             |             |             |
|---|-------------|-------------|-------------|
| H | -5.76686000 | -1.61020900 | -3.16386100 |
| C | -4.96453400 | 2.62156900  | 0.00453400  |
| C | -6.14020700 | 2.45910000  | 1.03006300  |
| H | -6.05038000 | 1.47888100  | 1.51286000  |
| H | -7.12256100 | 2.50479900  | 0.55012100  |
| H | -7.30604000 | 3.06328500  | -1.76939600 |
| H | -6.17250900 | 3.41073500  | -3.07004300 |
| C | -2.46983800 | 3.02317100  | 0.79842800  |
| H | -4.01698200 | 4.88161900  | 3.84287200  |
| H | -6.72585500 | 0.62150800  | -3.67268300 |
| C | -5.91170700 | 3.57240700  | 2.07338500  |
| H | -6.30207200 | 3.31209600  | 3.06405600  |
| H | -6.40684400 | 4.50764000  | 1.77596400  |
| C | -6.24834900 | 2.99265900  | -2.05969200 |
| C | -5.33470700 | 3.71895200  | -1.04686300 |
| H | -4.41707500 | 4.05089200  | -1.54551900 |
| H | -5.80383900 | 4.59564700  | -0.58889400 |
| C | -4.08127700 | -2.32915000 | -1.23703100 |
| C | -3.32769000 | -3.03617200 | -2.20620900 |
| C | -4.51555400 | -2.98901700 | -0.05782600 |
| C | -2.83397900 | -2.41824200 | -3.39934000 |
| C | -3.03128900 | -4.43789100 | -2.00262000 |
| C | -4.17599900 | -4.37937300 | 0.15129700  |
| C | -2.14973500 | -3.13820800 | -4.34301600 |
| H | -2.97130900 | -1.35272500 | -3.53154900 |
| C | -2.32686900 | -5.15691600 | -3.01942800 |
| C | -3.45121600 | -5.06647900 | -0.82690500 |
| C | -1.90975200 | -4.52988400 | -4.16404900 |
| H | -1.76082400 | -2.63375600 | -5.22156300 |
| H | -2.13805400 | -6.21699800 | -2.86394300 |
| H | -3.23078700 | -6.12261500 | -0.68071000 |
| H | -1.38309100 | -5.08840800 | -4.93392400 |
| C | -0.13606200 | 3.78034800  | 1.51912600  |
| C | 0.71795400  | 3.17626400  | 2.47365000  |
| C | 0.41079500  | 4.53144600  | 0.45025300  |
| C | 0.22680900  | 2.41155400  | 3.58155600  |
| C | 2.15027500  | 3.32421900  | 2.34614800  |
| C | 1.84551200  | 4.64456800  | 0.31659400  |
| C | 1.07925800  | 1.87288600  | 4.51062000  |
| H | -0.84212900 | 2.26106600  | 3.67588900  |
| C | 3.00484300  | 2.73302400  | 3.32960500  |
| C | 2.67524100  | 4.04185500  | 1.26706000  |
| C | 2.48960900  | 2.03490600  | 4.38847700  |
| H | 0.67784800  | 1.31350900  | 5.35213800  |

|   |              |              |              |
|---|--------------|--------------|--------------|
| H | 4. 07934400  | 2. 85914100  | 3. 21899900  |
| H | 3. 75399200  | 4. 13032800  | 1. 16006100  |
| H | 3. 14964300  | 1. 59826800  | 5. 13275100  |
| C | -5. 74345500 | -3. 02322000 | 2. 05977000  |
| H | -6. 36083100 | -2. 51287800 | 2. 79421200  |
| C | -5. 32593300 | -2. 35409400 | 0. 93859700  |
| H | -5. 62190500 | -1. 32219400 | 0. 79148200  |
| C | -5. 38394800 | -4. 38471200 | 2. 27106800  |
| H | -5. 72628100 | -4. 90132000 | 3. 16394000  |
| C | -4. 62360400 | -5. 03948900 | 1. 33934700  |
| H | -4. 35809500 | -6. 08569500 | 1. 47595800  |
| C | 0. 16160200  | 5. 91099400  | -1. 55042000 |
| H | -0. 47807200 | 6. 41186800  | -2. 27215000 |
| C | 1. 57588400  | 5. 99152700  | -1. 69431400 |
| H | 2. 00147800  | 6. 54358800  | -2. 52785200 |
| C | 2. 39189500  | 5. 37750300  | -0. 78371000 |
| H | 3. 47250500  | 5. 42379400  | -0. 88362400 |
| C | -0. 39933100 | 5. 20729100  | -0. 51747100 |
| H | -1. 47806100 | 5. 15879300  | -0. 42373200 |
| C | -0. 60295800 | -2. 90129600 | 3. 38123900  |
| C | -0. 20006500 | -3. 87808800 | 2. 22470500  |
| H | -0. 77257300 | -4. 80727900 | 2. 37308500  |
| H | -0. 58444100 | -3. 44021400 | 1. 30333100  |
| C | 1. 72382800  | -4. 42002000 | 0. 61177900  |
| C | 0. 83393100  | -4. 50253600 | -0. 48248400 |
| C | 3. 11114200  | -4. 44083300 | 0. 32887800  |
| C | 1. 30679100  | -4. 58996800 | -1. 78810300 |
| H | -0. 23849900 | -4. 51167700 | -0. 32662700 |
| C | 3. 58144400  | -4. 50651400 | -0. 97658900 |
| H | 3. 83199600  | -4. 36359600 | 1. 13505500  |
| C | 2. 67887800  | -4. 58031500 | -2. 04139900 |
| H | 0. 59503000  | -4. 64016800 | -2. 60554800 |
| H | 4. 65037100  | -4. 46882900 | -1. 16440400 |
| H | 3. 04434700  | -4. 61854800 | -3. 06348800 |
| C | 1. 24479100  | -4. 27531400 | 1. 99419700  |
| C | 0. 42176100  | -1. 74415500 | 3. 56130000  |
| H | 1. 23504100  | -2. 03379900 | 4. 22491800  |
| H | -0. 09027900 | -0. 89577500 | 4. 03039900  |
| N | 1. 00434800  | -1. 26402100 | 2. 30986100  |
| C | 2. 30443200  | -1. 10129300 | 2. 04616800  |
| N | 2. 60271800  | -0. 45387300 | 0. 90443000  |
| C | 3. 85447600  | -0. 19512600 | 0. 28508400  |
| C | 4. 90691300  | -1. 11235300 | 0. 24943000  |
| C | 3. 97421000  | 1. 01955800  | -0. 39939000 |

|   |             |             |             |
|---|-------------|-------------|-------------|
| C | 6.07755100  | -0.79684500 | -0.44030600 |
| C | 5.15229500  | 1.32219700  | -1.08073100 |
| H | 3.14621200  | 1.71901100  | -0.40180900 |
| C | 6.21618100  | 0.42052000  | -1.10445500 |
| H | 7.12798400  | 0.65741200  | -1.63776300 |
| C | 5.27756200  | 2.66584000  | -1.75144100 |
| C | 7.16138600  | -1.83959400 | -0.50885000 |
| F | 4.15290700  | 3.00675100  | -2.40830000 |
| F | 6.29873100  | 2.70060000  | -2.63192800 |
| F | 5.51117900  | 3.65035000  | -0.84011600 |
| F | 7.40252000  | -2.38840400 | 0.70252100  |
| F | 8.32436300  | -1.34161200 | -0.97221200 |
| F | 6.81146900  | -2.86430900 | -1.33023800 |
| S | 3.53930700  | -1.72446800 | 3.12369800  |
| H | 4.81398900  | -2.06778700 | 0.74338900  |
| H | 1.80598200  | -0.20079100 | 0.30251600  |
| H | 0.33626300  | -0.76644000 | 1.68897800  |
| C | 2.12732200  | -4.43700200 | 3.06113800  |
| H | 1.72080200  | -4.50172300 | 4.06471900  |
| H | 2.76419200  | -3.18429400 | 3.13377700  |
| H | 3.02688900  | -5.03026600 | 2.91287400  |
| N | -1.36949000 | 0.25171500  | -1.66297800 |
| S | 0.04867700  | -0.02767800 | -2.30246300 |
| O | -0.08393300 | -0.68405000 | -3.60294400 |
| O | 1.05686200  | -0.58152600 | -1.36069400 |
| C | 0.74776300  | 1.65964100  | -2.69747000 |
| F | -0.08702900 | 2.36781600  | -3.45769000 |
| F | 1.91749200  | 1.53026000  | -3.33534800 |
| F | 0.96440500  | 2.33152700  | -1.54936900 |
| C | -1.97870600 | -2.31653900 | 2.98967300  |
| H | -2.70234500 | -3.11565400 | 2.79809100  |
| H | -2.37344300 | -1.69873600 | 3.80499500  |
| H | -1.92121400 | -1.68617500 | 2.09795900  |
| C | -0.77597500 | -3.60609600 | 4.74373900  |
| H | -1.10190300 | -2.88425700 | 5.50221300  |
| H | -1.54845000 | -4.38043900 | 4.67745600  |
| H | 0.13868600  | -4.07591100 | 5.11782400  |

TS-EF-1R

1 imaginary frequencies

H = -5198.724770

G = -5198.916070

E(M06-2X-DCM) = 5199.561361

|   |             |            |             |
|---|-------------|------------|-------------|
| O | -3.19743700 | 0.11786600 | -0.92546200 |
|---|-------------|------------|-------------|

|   |             |             |             |
|---|-------------|-------------|-------------|
| O | -2.11681500 | -1.73780200 | 0.53521200  |
| P | -1.74729100 | -0.43113300 | -0.39084400 |
| O | -1.04271900 | 0.52068300  | 0.53489600  |
| C | -6.27916900 | 1.11947100  | 1.72720500  |
| C | -6.03627600 | -0.20833900 | 1.39257600  |
| C | -5.05274400 | -0.54341500 | 0.44838200  |
| C | -4.49153000 | 1.82172100  | 0.20974400  |
| C | -5.53285800 | 2.11953200  | 1.10601100  |
| C | -2.65888500 | -2.88161500 | -0.04992400 |
| C | -4.01511700 | -2.91171700 | -0.36362300 |
| C | -4.51394100 | -3.97172300 | -1.13639700 |
| C | -3.69954300 | -5.04808000 | -1.47211800 |
| C | -2.38209200 | -5.06932000 | -1.01262200 |
| C | -1.82895800 | -3.99092100 | -0.30299200 |
| H | -5.74466000 | 3.16297100  | 1.31996100  |
| H | -1.75039200 | -5.92801600 | -1.22027700 |
| C | -5.16831100 | -2.02300700 | 0.08997800  |
| C | -5.79250400 | -2.57744500 | 1.41679900  |
| H | -4.98623400 | -2.73892200 | 2.14199700  |
| H | -6.30432600 | -3.53332700 | 1.27001100  |
| H | -6.63386500 | -4.39507100 | -0.93372800 |
| H | -6.16586900 | -3.90585200 | -2.55825200 |
| C | -4.23487700 | 0.46259100  | -0.06795900 |
| H | -7.05191000 | 1.38018000  | 2.44616400  |
| H | -4.08339500 | -5.87294700 | -2.06703800 |
| C | -6.72200000 | -1.45151900 | 1.91470400  |
| H | -6.83305900 | -1.44397000 | 3.00527500  |
| H | -7.73354000 | -1.55245000 | 1.49692100  |
| C | -5.96448700 | -3.72860700 | -1.49561300 |
| C | -6.16976000 | -2.25092300 | -1.09172300 |
| H | -5.88551100 | -1.59639900 | -1.92351100 |
| H | -7.20268500 | -2.01471400 | -0.81718200 |
| C | -0.42892600 | -4.09034500 | 0.21734100  |
| C | 0.66737700  | -4.16394100 | -0.67652600 |
| C | -0.21498400 | -4.21449900 | 1.61455900  |
| C | 0.51999300  | -4.01792200 | -2.09339300 |
| C | 2.00211800  | -4.37352600 | -0.15768400 |
| C | 1.12761600  | -4.39752100 | 2.11979500  |
| C | 1.59941400  | -4.10051000 | -2.93355100 |
| H | -0.45830400 | -3.79223800 | -2.49858600 |
| C | 3.10010500  | -4.46237900 | -1.07068600 |
| C | 2.19660400  | -4.47444300 | 1.22226500  |
| C | 2.90641400  | -4.33675300 | -2.42120600 |
| H | 1.46007200  | -3.94637300 | -3.99852800 |



|   |             |             |             |
|---|-------------|-------------|-------------|
| H | 4.09804900  | -4.61727700 | -0.66750200 |
| H | 3.20297600  | -4.62569500 | 1.60760400  |
| H | 3.75237500  | -4.38343100 | -3.10021700 |
| C | -3.75554000 | 2.94554500  | -0.44861500 |
| C | -3.02411200 | 3.87121400  | 0.33680000  |
| C | -3.87823200 | 3.14502100  | -1.84760600 |
| C | -2.86789600 | 3.73928400  | 1.75543500  |
| C | -2.40393100 | 5.01467600  | -0.29497600 |
| C | -3.22046900 | 4.27182500  | -2.46953400 |
| C | -2.20029400 | 4.68321400  | 2.49343600  |
| H | -3.29489400 | 2.87383000  | 2.24855800  |
| C | -1.70694600 | 5.96938700  | 0.51073400  |
| C | -2.50582400 | 5.17483000  | -1.67867900 |
| C | -1.61495200 | 5.82023200  | 1.86757300  |
| H | -2.11447600 | 4.56360000  | 3.57060400  |
| H | -1.25544500 | 6.82575500  | 0.01520200  |
| H | -2.02976800 | 6.03214900  | -2.15063200 |
| H | -1.09083400 | 6.55821600  | 2.46872200  |
| C | -1.04220600 | -4.33477500 | 3.91638300  |
| H | -1.87513400 | -4.33369100 | 4.61497100  |
| C | -1.28149300 | -4.20195900 | 2.57205000  |
| H | -2.30088000 | -4.10142900 | 2.21757800  |
| C | 0.28560700  | -4.49085900 | 4.40787700  |
| H | 0.45758800  | -4.59724800 | 5.47573200  |
| C | 1.33565800  | -4.52214300 | 3.52990900  |
| H | 2.35428000  | -4.65231500 | 3.88764700  |
| C | -4.74923300 | 2.50794400  | -4.04112200 |
| H | -5.34572100 | 1.83902700  | -4.65542900 |
| C | -4.06947700 | 3.59901700  | -4.65192300 |
| H | -4.14615500 | 3.74918300  | -5.72527900 |
| C | -3.33278800 | 4.45781100  | -3.88283100 |
| H | -2.81954400 | 5.30496100  | -4.33180400 |
| C | -4.65859900 | 2.29143000  | -2.69136400 |
| H | -5.19115700 | 1.45864800  | -2.24801000 |
| N | -1.08551200 | -0.96493000 | -1.75348100 |
| S | 0.08384600  | -0.32755200 | -2.60322500 |
| O | 0.36770200  | -1.14358900 | -3.78238200 |
| O | 1.24248100  | 0.14168400  | -1.79602400 |
| C | -0.58536700 | 1.28095300  | -3.28660800 |
| F | -1.71524500 | 1.07398200  | -3.96298400 |
| F | 0.31723500  | 1.83881500  | -4.10060000 |
| F | -0.83676100 | 2.13964100  | -2.27875700 |
| C | -0.28425100 | 0.43641700  | 4.23068600  |
| C | 0.08540000  | 1.91212100  | 3.84739400  |

|   |             |             |             |
|---|-------------|-------------|-------------|
| H | -0.26796400 | 2.55241800  | 4.67125700  |
| H | -0.51909700 | 2.20051300  | 2.98757800  |
| C | 1.82850100  | 3.14009200  | 2.40793100  |
| C | 1.08706000  | 3.01340600  | 1.21116800  |
| C | 2.92252500  | 4.03740200  | 2.41804200  |
| C | 1.45601200  | 3.71375400  | 0.06619500  |
| H | 0.25287200  | 2.32544100  | 1.13691600  |
| C | 3.27226200  | 4.75356800  | 1.27874200  |
| H | 3.47921900  | 4.20285200  | 3.33481000  |
| C | 2.54707700  | 4.58432000  | 0.09493000  |
| H | 0.89203300  | 3.55713900  | -0.84761200 |
| H | 4.11310000  | 5.43996300  | 1.31144400  |
| H | 2.83282200  | 5.13075500  | -0.79954000 |
| C | 1.51690900  | 2.32585400  | 3.59341400  |
| C | 0.58828400  | -0.63063600 | 3.49660500  |
| H | 1.43572300  | -0.92451200 | 4.11431700  |
| H | -0.02187800 | -1.52705200 | 3.33927500  |
| N | 1.12111000  | -0.22187200 | 2.19608300  |
| C | 2.40379400  | -0.30253000 | 1.81589300  |
| N | 2.67463900  | -0.20229400 | 0.50437000  |
| C | 3.96602900  | -0.05355500 | -0.08538500 |
| C | 4.77596700  | 1.04544400  | 0.21187500  |
| C | 4.37132600  | -0.98719500 | -1.03687200 |
| C | 6.00931000  | 1.18188900  | -0.42160400 |
| C | 5.61031700  | -0.83824300 | -1.66579100 |
| H | 3.72448900  | -1.82236500 | -1.28260200 |
| C | 6.43723700  | 0.23958300  | -1.36021100 |
| H | 7.39397100  | 0.35370100  | -1.85429100 |
| C | 6.03772800  | -1.88227500 | -2.66519200 |
| C | 6.90073900  | 2.33897400  | -0.05589600 |
| F | 5.14454700  | -2.00915600 | -3.66839200 |
| F | 7.23573600  | -1.60002000 | -3.21799200 |
| F | 6.14240700  | -3.10384200 | -2.08351900 |
| F | 7.64834800  | 2.06786700  | 1.03868600  |
| F | 7.75686300  | 2.65144900  | -1.05150300 |
| F | 6.18442600  | 3.45230700  | 0.22903600  |
| S | 3.69373200  | -0.48476400 | 2.98184600  |
| H | 4.43749700  | 1.79204100  | 0.91955100  |
| H | 1.90341400  | -0.19694300 | -0.18400700 |
| H | 0.40558700  | -0.02651200 | 1.47143800  |
| C | 2.54479800  | 1.92521800  | 4.44945700  |
| H | 2.28505500  | 1.55734800  | 5.43867100  |
| H | 3.01764900  | 0.78617500  | 3.85087800  |
| H | 3.49744600  | 2.45079300  | 4.40324100  |

|   |             |             |            |
|---|-------------|-------------|------------|
| C | -1.76971300 | 0.25016200  | 3.84712900 |
| H | -2.39508500 | 1.00020400  | 4.34724600 |
| H | -2.12246300 | -0.73981100 | 4.15841800 |
| H | -1.91583500 | 0.34019600  | 2.76756500 |
| C | -0.15864000 | 0.16649600  | 5.74575200 |
| H | -0.46384300 | -0.86249000 | 5.97027700 |
| H | -0.81318000 | 0.83603800  | 6.31575900 |
| H | 0.86213300  | 0.28800000  | 6.12139400 |

TS-EF-1R-1

l imaginary frequencies

H = -5198.724349

G = -5198.915022

E(M06-2X-DCM) = -5199.559749

|   |            |             |             |
|---|------------|-------------|-------------|
| O | 1.89283600 | 2.09051100  | 0.08248400  |
| O | 2.58706100 | -0.12568700 | -1.08452600 |
| P | 1.41116700 | 0.54266500  | -0.17043000 |
| O | 1.25858300 | -0.05170800 | 1.20012100  |
| C | 1.73938600 | 4.66951200  | -3.20740700 |
| C | 2.78468900 | 3.76423900  | -3.06850000 |
| C | 2.91155200 | 2.99744000  | -1.90123200 |
| C | 0.84262700 | 3.96273900  | -1.04255300 |
| C | 0.81213600 | 4.79690500  | -2.17359600 |
| C | 3.93934300 | -0.04807000 | -0.74666400 |
| C | 4.66508300 | 1.09982300  | -1.07385700 |
| C | 6.01151300 | 1.18447500  | -0.67842600 |
| C | 6.64384500 | 0.12322000  | -0.04208100 |
| C | 5.91966100 | -1.03867100 | 0.21033600  |
| C | 4.55934100 | -1.14923200 | -0.12197200 |
| H | 0.01799700 | 5.53354200  | -2.24919400 |
| H | 6.40183300 | -1.88568000 | 0.68949600  |
| C | 4.28793500 | 2.34176800  | -1.88199300 |
| C | 4.52016800 | 2.15802700  | -3.41682500 |
| H | 5.57770100 | 2.03033200  | -3.67020000 |
| H | 3.97755500 | 1.26608000  | -3.74806100 |
| H | 7.21073300 | 2.94935200  | -0.22587400 |
| H | 7.23679900 | 2.46619200  | -1.91958700 |
| C | 1.88772600 | 3.02020100  | -0.96057300 |
| H | 1.64329800 | 5.27727700  | -4.10343500 |
| H | 7.68750600 | 0.19466600  | 0.25357400  |
| C | 3.88368700 | 3.41795300  | -4.05081200 |
| H | 4.61356200 | 4.23340000  | -4.15133000 |
| H | 3.48658200 | 3.22376500  | -5.05326100 |
| C | 6.59378500 | 2.53328500  | -1.03059400 |

|   |             |             |             |
|---|-------------|-------------|-------------|
| C | 5.33161400  | 3.36685300  | -1.31233300 |
| H | 5.50313100  | 4.20647300  | -1.99183200 |
| H | 4.94310900  | 3.77486200  | -0.37177100 |
| C | 3.87500600  | -2.44648900 | 0.18341400  |
| C | 3.59002500  | -3.35847100 | -0.86210800 |
| C | 3.65628400  | -2.82088200 | 1.53155700  |
| C | 3.84533300  | -3.06246600 | -2.23881800 |
| C | 3.05636700  | -4.66492700 | -0.54575500 |
| C | 3.14664800  | -4.13929000 | 1.83523500  |
| C | 3.57046700  | -3.97087300 | -3.22704000 |
| H | 4.26018300  | -2.09531000 | -2.49784900 |
| C | 2.77544700  | -5.58053800 | -1.60804100 |
| C | 2.85274700  | -5.01971400 | 0.79093200  |
| C | 3.02236300  | -5.24636000 | -2.91209300 |
| H | 3.76783100  | -3.71541600 | -4.26435000 |
| H | 2.36860000  | -6.55620400 | -1.35212800 |
| H | 2.46906800  | -6.01090800 | 1.02448900  |
| H | 2.80715900  | -5.95159300 | -3.71021000 |
| C | -0.18699700 | 4.13888100  | 0.02885200  |
| C | 0.20630200  | 4.55175900  | 1.32930800  |
| C | -1.56461400 | 3.98884000  | -0.27806700 |
| C | 1.57214200  | 4.77418500  | 1.69905300  |
| C | -0.80064000 | 4.79774300  | 2.33805600  |
| C | -2.56063600 | 4.27796100  | 0.73112500  |
| C | 1.92063100  | 5.16320000  | 2.96636800  |
| H | 2.34483500  | 4.63808600  | 0.95201300  |
| C | -0.39576300 | 5.19708800  | 3.65157500  |
| C | -2.15281400 | 4.66307800  | 2.01032100  |
| C | 0.92614900  | 5.36910800  | 3.96436600  |
| H | 2.96680900  | 5.32423000  | 3.21248700  |
| H | -1.17009700 | 5.37482900  | 4.39473800  |
| H | -2.90640300 | 4.87047800  | 2.76767300  |
| H | 1.21971400  | 5.68009200  | 4.96356100  |
| C | 3.75987700  | -2.35675000 | 3.92967000  |
| H | 3.99288000  | -1.67695700 | 4.74512200  |
| C | 3.93370600  | -1.94717800 | 2.63288800  |
| H | 4.28619900  | -0.94366900 | 2.42604000  |
| C | 3.27426900  | -3.66374700 | 4.22294700  |
| H | 3.14824900  | -3.97317100 | 5.25733400  |
| C | 2.96734800  | -4.52200100 | 3.20181700  |
| H | 2.58839100  | -5.51986200 | 3.41009300  |
| C | -3.36997500 | 3.42308200  | -1.82698300 |
| H | -3.68810800 | 3.05134400  | -2.79606000 |
| C | -4.34605800 | 3.75395400  | -0.84432300 |

|   |             |             |             |
|---|-------------|-------------|-------------|
| H | -5.40115700 | 3.65464700  | -1.08311800 |
| C | -3.94816400 | 4.15977800  | 0.40174800  |
| H | -4.68032600 | 4.39916900  | 1.16959300  |
| C | -2.03175100 | 3.53819500  | -1.55543200 |
| H | -1.31108100 | 3.26278300  | -2.31440600 |
| N | 0.05183300  | 0.42499200  | -1.03700800 |
| S | -0.21137700 | 0.38306300  | -2.62439400 |
| C | 0.17206700  | -1.39431500 | -3.12028300 |
| O | 0.70566500  | 1.18981500  | -3.43818500 |
| O | -1.65813000 | 0.49868200  | -2.83898300 |
| F | 1.46470000  | -1.53406700 | -3.41798300 |
| F | -0.13298600 | -2.25070700 | -2.12346600 |
| F | -0.55646200 | -1.71851200 | -4.19086600 |
| C | -0.00250700 | 0.32872500  | 4.72059300  |
| C | -0.00288200 | -1.21448000 | 4.44203100  |
| H | 0.42181000  | -1.70598500 | 5.33262300  |
| H | 0.71725700  | -1.41666000 | 3.64853100  |
| C | -1.28116100 | -2.99870900 | 3.10313600  |
| C | -0.46991600 | -2.88790900 | 1.95094600  |
| C | -2.14943800 | -4.11153200 | 3.20079600  |
| C | -0.56867200 | -3.82245300 | 0.92265900  |
| H | 0.19786800  | -2.04330100 | 1.81587000  |
| C | -2.22528500 | -5.05303400 | 2.18199600  |
| H | -2.74184600 | -4.25725500 | 4.09823400  |
| C | -1.44885900 | -4.90139000 | 1.02929300  |
| H | 0.03781600  | -3.69649600 | 0.03185900  |
| H | -2.89375300 | -5.90318100 | 2.28294800  |
| H | -1.53078200 | -5.61929000 | 0.21840700  |
| C | -1.28138400 | -1.96088700 | 4.14296900  |
| C | -1.02645500 | 1.10035800  | 3.83683400  |
| H | -2.00274300 | 1.14376900  | 4.31798400  |
| H | -0.67734700 | 2.13473300  | 3.72742300  |
| N | -1.22080200 | 0.53842100  | 2.50049100  |
| C | -2.40092700 | 0.30432200  | 1.90161900  |
| N | -2.38528300 | 0.10093900  | 0.57282300  |
| C | -3.45056100 | -0.42680700 | -0.21632800 |
| C | -3.21780300 | -1.60487100 | -0.92344100 |
| C | -4.66835000 | 0.23918900  | -0.34806600 |
| C | -4.21016700 | -2.12500000 | -1.75345400 |
| C | -5.65585600 | -0.29309600 | -1.17767600 |
| H | -4.83181900 | 1.17538900  | 0.17056300  |
| C | -5.43646400 | -1.47642100 | -1.88435300 |
| H | -6.20609800 | -1.88182500 | -2.52882400 |
| C | -6.93908700 | 0.47520100  | -1.34821100 |

|   |             |             |             |
|---|-------------|-------------|-------------|
| C | -3.91519700 | -3.40211800 | -2.49370000 |
| F | -6.76020900 | 1.57698000  | -2.12011300 |
| F | -7.90444300 | -0.26431000 | -1.93270600 |
| F | -7.41977000 | 0.91186500  | -0.16285100 |
| F | -3.63587700 | -4.41465700 | -1.63194500 |
| F | -4.95169100 | -3.80392700 | -3.25816300 |
| F | -2.83847900 | -3.27486700 | -3.29654500 |
| S | -3.88049600 | 0.18983800  | 2.81761700  |
| H | -2.26165600 | -2.10542800 | -0.83270600 |
| H | -1.49521200 | 0.24235300  | 0.05288800  |
| H | -0.36226600 | 0.42743100  | 1.93473900  |
| C | -2.48022200 | -1.65922700 | 4.80055200  |
| H | -2.43709800 | -1.09235100 | 5.72671100  |
| H | -3.06586300 | -0.79478400 | 3.96682400  |
| H | -3.28463900 | -2.39297800 | 4.76486800  |
| C | 1.42826500  | 0.83055400  | 4.41758100  |
| H | 2.16113500  | 0.29144800  | 5.02983400  |
| H | 1.51383900  | 1.89795100  | 4.65228200  |
| H | 1.69249500  | 0.68622200  | 3.36629500  |
| C | -0.30915000 | 0.67168100  | 6.19442700  |
| H | -0.26052400 | 1.75659100  | 6.34624300  |
| H | 0.43256000  | 0.21437200  | 6.85928900  |
| H | -1.30128600 | 0.34400700  | 6.52034200  |

TS-EF-1R-2

l imaginary frequencies

H = -5198.722679

G = -5198.915084

E(M06-2X-DCM) = -5199.559568

|   |             |             |             |
|---|-------------|-------------|-------------|
| O | -2.03074200 | -1.93630200 | 0.48898900  |
| O | -2.73226600 | 0.09001600  | -0.97093700 |
| P | -1.51390400 | -0.47599100 | -0.04733600 |
| O | -1.23944700 | 0.33414600  | 1.18752900  |
| C | -2.33809000 | -4.93619000 | -2.41287600 |
| C | -3.33509000 | -3.97568400 | -2.28474200 |
| C | -3.29835200 | -3.04377800 | -1.23535700 |
| C | -1.17487600 | -3.98020300 | -0.48354800 |
| C | -1.29731700 | -4.95890000 | -1.48466500 |
| C | -4.04247500 | 0.18871000  | -0.50614900 |
| C | -4.85957800 | -0.94184500 | -0.54161600 |
| C | -6.15491200 | -0.86328900 | -0.00518700 |
| C | -6.65983700 | 0.34244100  | 0.46820100  |
| C | -5.85760900 | 1.47961000  | 0.40879800  |
| C | -4.53400000 | 1.43205200  | -0.06266400 |

|   |             |             |             |
|---|-------------|-------------|-------------|
| H | -0.53550700 | -5.73003900 | -1.54709800 |
| H | -6.24772000 | 2.43493600  | 0.74693900  |
| C | -4.63964300 | -2.32120400 | -1.15768600 |
| C | -5.06061300 | -2.36960600 | -2.66356000 |
| H | -6.13693200 | -2.22906000 | -2.80447200 |
| H | -4.53935400 | -1.56805600 | -3.19785100 |
| H | -7.35608100 | -2.44403300 | 0.89989800  |
| H | -7.57858300 | -2.26796600 | -0.83793300 |
| C | -2.17435100 | -2.98991500 | -0.41481200 |
| H | -2.36946700 | -5.66872600 | -3.21542300 |
| H | -7.66744100 | 0.40365600  | 0.87171200  |
| C | -4.54814100 | -3.74105700 | -3.16009500 |
| H | -5.30291500 | -4.52784800 | -3.02288100 |
| H | -4.29364600 | -3.73319900 | -4.22609200 |
| C | -6.83045600 | -2.21538400 | -0.03434500 |
| C | -5.64838200 | -3.16649900 | -0.30393100 |
| H | -5.93971000 | -4.09622800 | -0.80137200 |
| H | -5.16657800 | -3.43326700 | 0.64399200  |
| C | -3.74892800 | 2.70488300  | -0.10200300 |
| C | -3.40330400 | 3.28917700  | -1.34609000 |
| C | -3.46549700 | 3.38700400  | 1.10794000  |
| C | -3.68540000 | 2.66791800  | -2.60445900 |
| C | -2.76593800 | 4.58681000  | -1.37109800 |
| C | -2.85003500 | 4.69414000  | 1.06520300  |
| C | -3.33942000 | 3.26319600  | -3.78833200 |
| H | -4.17855000 | 1.70363800  | -2.61647600 |
| C | -2.42081400 | 5.17334600  | -2.62902300 |
| C | -2.51658600 | 5.25568500  | -0.16974300 |
| C | -2.69341900 | 4.53127400  | -3.80574600 |
| H | -3.55571800 | 2.76101200  | -4.72713400 |
| H | -1.93734400 | 6.14760500  | -2.62641400 |
| H | -2.05280900 | 6.23973700  | -0.19695800 |
| H | -2.42254100 | 4.98465100  | -4.75527800 |
| C | -0.02926600 | -4.05353500 | 0.47452300  |
| C | -0.26986400 | -4.28146800 | 1.85478300  |
| C | 1.30142400  | -3.99983100 | -0.01275800 |
| C | -1.58475200 | -4.38791200 | 2.41281100  |
| C | 0.84807200  | -4.44628200 | 2.75740800  |
| C | 2.40575300  | -4.22841300 | 0.89295200  |
| C | -1.78247600 | -4.59054200 | 3.75396100  |
| H | -2.44116200 | -4.31135300 | 1.75368400  |
| C | 0.59983200  | -4.64964200 | 4.15211300  |
| C | 2.15088000  | -4.43173400 | 2.25129300  |
| C | -0.67684500 | -4.71284300 | 4.64285600  |

|   |             |             |             |
|---|-------------|-------------|-------------|
| H | -2.79379200 | -4.66610500 | 4.14455700  |
| H | 1.45556900  | -4.76588200 | 4.81350000  |
| H | 2.98638100  | -4.58886500 | 2.93076700  |
| H | -0.85172500 | -4.87399800 | 5.70335800  |
| C | -3.51182400 | 3.54179800  | 3.54940100  |
| H | -3.75902500 | 3.10327500  | 4.51301600  |
| C | -3.76253600 | 2.83910100  | 2.39867300  |
| H | -4.18923500 | 1.84486700  | 2.45814600  |
| C | -2.92866900 | 4.84036200  | 3.49836600  |
| H | -2.74387700 | 5.38648600  | 4.41985400  |
| C | -2.60032900 | 5.39111800  | 2.28897700  |
| H | -2.14411300 | 6.37682100  | 2.23375800  |
| C | 2.91060500  | -3.70876000 | -1.82906100 |
| H | 3.11779900  | -3.46312400 | -2.86635200 |
| C | 3.98945900  | -3.99796900 | -0.94599200 |
| H | 5.00897500  | -3.99169100 | -1.31903700 |
| C | 3.74112500  | -4.23653800 | 0.37939000  |
| H | 4.55741400  | -4.43513300 | 1.07048600  |
| C | 1.61584700  | -3.70910000 | -1.38047700 |
| H | 0.81390800  | -3.45223900 | -2.06017500 |
| N | -0.26616000 | -0.74688400 | -1.03892300 |
| S | 0.14111500  | 0.04629500  | -2.36703100 |
| C | -0.84185900 | -0.75597800 | -3.75047600 |
| O | 1.53177200  | -0.29952900 | -2.69121100 |
| O | -0.25628200 | 1.46333200  | -2.39093600 |
| F | -0.73356700 | -2.09185300 | -3.69199200 |
| F | -2.14162700 | -0.43448700 | -3.68379900 |
| F | -0.36052500 | -0.33800700 | -4.92516600 |
| C | 0.00324100  | 0.56370500  | 4.62818800  |
| C | 0.06249400  | 2.00679900  | 4.02320300  |
| H | -0.38190800 | 2.68985300  | 4.76520300  |
| H | -0.62225400 | 2.04400300  | 3.17527900  |
| C | 1.42022300  | 3.45898600  | 2.39558400  |
| C | 0.65046200  | 3.12593800  | 1.25841100  |
| C | 2.29667400  | 4.56554500  | 2.30589400  |
| C | 0.79779700  | 3.83316300  | 0.06674400  |
| H | -0.02919300 | 2.28051600  | 1.27299000  |
| C | 2.41460300  | 5.28939400  | 1.12565900  |
| H | 2.85853000  | 4.88127000  | 3.17927700  |
| C | 1.68066200  | 4.91332800  | -0.00372100 |
| H | 0.23231600  | 3.52162900  | -0.80620300 |
| H | 3.08434500  | 6.14364100  | 1.08273000  |
| H | 1.79779800  | 5.45890500  | -0.93544400 |
| C | 1.37093800  | 2.64655200  | 3.61984700  |



|   |             |             |             |
|---|-------------|-------------|-------------|
| C | 0.98000400  | -0.42875200 | 3.92475500  |
| H | 1.94775200  | -0.43908300 | 4.42453900  |
| H | 0.56487900  | -1.44110300 | 4.00832200  |
| N | 1.22718100  | -0.15909700 | 2.50591900  |
| C | 2.42807000  | -0.08460300 | 1.91567000  |
| N | 2.47889100  | -0.16004800 | 0.56999500  |
| C | 3.62069600  | 0.18312600  | -0.22769000 |
| C | 3.55312000  | 1.30589200  | -1.05198700 |
| C | 4.76987900  | -0.60571200 | -0.20223600 |
| C | 4.65157400  | 1.64722000  | -1.84132000 |
| C | 5.86581500  | -0.24940300 | -0.98922800 |
| H | 4.79900800  | -1.49745300 | 0.41047800  |
| C | 5.81299500  | 0.87672100  | -1.81051200 |
| H | 6.66567000  | 1.14861600  | -2.42144500 |
| C | 7.13805100  | -1.04998600 | -0.90730700 |
| C | 4.56623300  | 2.83267600  | -2.76752300 |
| F | 6.90055300  | -2.35073500 | -0.61475900 |
| F | 7.82915300  | -1.01523800 | -2.06692200 |
| F | 7.96260200  | -0.57991400 | 0.05657900  |
| F | 3.75884500  | 3.79840300  | -2.27018100 |
| F | 5.78258200  | 3.39087200  | -2.97102900 |
| F | 4.08059900  | 2.49398000  | -3.97793900 |
| S | 3.88647800  | 0.16826100  | 2.84028700  |
| H | 2.65378500  | 1.90863900  | -1.07461100 |
| H | 1.62188700  | -0.40633700 | 0.05607900  |
| H | 0.38135400  | -0.11474000 | 1.91157800  |
| C | 2.54521600  | 2.45291200  | 4.35005900  |
| H | 2.47789900  | 2.08549400  | 5.37010900  |
| H | 3.10984400  | 1.38413600  | 3.71705800  |
| H | 3.38283000  | 3.12501000  | 4.16790100  |
| C | -1.45400200 | 0.07605300  | 4.45234500  |
| H | -2.15061100 | 0.76845400  | 4.94014200  |
| H | -1.58268600 | -0.91013600 | 4.91382200  |
| H | -1.72945100 | 0.00410100  | 3.39713200  |
| C | 0.31538600  | 0.52676200  | 6.14040500  |
| H | 0.20081500  | -0.49459400 | 6.52302900  |
| H | -0.38441700 | 1.16355900  | 6.69354100  |
| H | 1.33159300  | 0.84938800  | 6.38576500  |

TS-EF-1R-3

l imaginary frequencies

H = -5198.721004

G= -5198.912222

E(M06-2X-DCM) = -5199.556062

|   |             |             |             |
|---|-------------|-------------|-------------|
| O | -3.10675300 | -0.18737400 | -1.14206800 |
| O | -1.97429100 | -1.96082700 | 0.38085500  |
| P | -1.72032800 | -0.51114100 | -0.33516000 |
| O | -1.44205500 | 0.45513000  | 0.78304300  |
| C | -6.69891100 | 0.17840000  | 0.97599800  |
| C | -6.20573600 | -1.07347000 | 0.62410500  |
| C | -5.04188100 | -1.19151500 | -0.15092600 |
| C | -4.80613400 | 1.23929900  | -0.16018500 |
| C | -6.01634600 | 1.31770200  | 0.55138600  |
| C | -2.24526700 | -3.11327100 | -0.35417900 |
| C | -3.51946200 | -3.31435600 | -0.88434600 |
| C | -3.72530700 | -4.38298000 | -1.77198000 |
| C | -2.72101600 | -5.31546900 | -2.00746400 |
| C | -1.50441900 | -5.18169500 | -1.33971600 |
| C | -1.23066100 | -4.07898100 | -0.51263400 |
| H | -6.41128600 | 2.30166100  | 0.78623700  |
| H | -0.73153800 | -5.93327400 | -1.46937700 |
| C | -4.85848900 | -2.64040800 | -0.59003900 |
| C | -5.59270100 | -3.37493400 | 0.58480800  |
| H | -4.90045200 | -3.46276300 | 1.43047500  |
| H | -5.91367400 | -4.38466000 | 0.31153900  |
| H | -5.75874000 | -5.12210800 | -1.94649300 |
| H | -5.11792200 | -4.46189600 | -3.44671900 |
| C | -4.31517400 | -0.04545600 | -0.46827500 |
| H | -7.60960900 | 0.27375400  | 1.56215500  |
| H | -2.88379500 | -6.15025800 | -2.68449800 |
| C | -6.76028100 | -2.43941800 | 0.96376600  |
| H | -7.04774800 | -2.52644700 | 2.01801800  |
| H | -7.66016100 | -2.66270400 | 0.37356900  |
| C | -5.11949200 | -4.32887600 | -2.35877500 |
| C | -5.61038600 | -2.92812700 | -1.93229400 |
| H | -5.30056600 | -2.18353600 | -2.67429600 |
| H | -6.69755900 | -2.86192400 | -1.82512400 |
| C | 0.07940000  | -4.01498100 | 0.20728500  |
| C | 1.29255300  | -3.98663500 | -0.52543900 |
| C | 0.11038600  | -4.09961600 | 1.62438200  |
| C | 1.33422400  | -3.87815400 | -1.95286100 |
| C | 2.55628100  | -4.06055100 | 0.17492400  |
| C | 1.38205700  | -4.13484000 | 2.31191200  |
| C | 2.52284100  | -3.89029200 | -2.63456100 |
| H | 0.40546600  | -3.75026800 | -2.49463200 |
| C | 3.77443300  | -4.06789900 | -0.57531500 |
| C | 2.56726100  | -4.11968500 | 1.57090500  |
| C | 3.76176300  | -3.99343500 | -1.94187700 |

|   |              |              |              |
|---|--------------|--------------|--------------|
| H | 2. 52112800  | -3. 78808600 | -3. 71599400 |
| H | 4. 71486300  | -4. 12108900 | -0. 03281600 |
| H | 3. 52049000  | -4. 17242700 | 2. 09343000  |
| H | 4. 69569900  | -3. 98463200 | -2. 49573700 |
| C | -4. 12652300 | 2. 50137200  | -0. 58717500 |
| C | -3. 68955600 | 3. 43125700  | 0. 38988500  |
| C | -4. 01054700 | 2. 81285900  | -1. 96570000 |
| C | -3. 77073200 | 3. 18060100  | 1. 79864200  |
| C | -3. 13642300 | 4. 70045500  | -0. 02676800 |
| C | -3. 41697100 | 4. 06831000  | -2. 36648500 |
| C | -3. 39146400 | 4. 12544800  | 2. 71794500  |
| H | -4. 14232900 | 2. 22089500  | 2. 13724100  |
| C | -2. 74632000 | 5. 65506200  | 0. 96459200  |
| C | -3. 00188900 | 4. 97677500  | -1. 38970500 |
| C | -2. 87906300 | 5. 38650600  | 2. 29978300  |
| H | -3. 48169000 | 3. 91029800  | 3. 77994900  |
| H | -2. 34268900 | 6. 60729000  | 0. 62822100  |
| H | -2. 57843900 | 5. 93060800  | -1. 69874900 |
| H | -2. 58755300 | 6. 12515300  | 3. 04173200  |
| C | -1. 00689200 | -4. 28114900 | 3. 79593100  |
| H | -1. 92355000 | -4. 36072600 | 4. 37467300  |
| C | -1. 07177800 | -4. 19308500 | 2. 42870900  |
| H | -2. 03837000 | -4. 20937500 | 1. 93955600  |
| C | 0. 24936200  | -4. 28582300 | 4. 46700900  |
| H | 0. 28303300  | -4. 35898800 | 5. 55089700  |
| C | 1. 40731000  | -4. 21759900 | 3. 74002400  |
| H | 2. 37554700  | -4. 23610800 | 4. 23475700  |
| C | -4. 36415200 | 2. 28511600  | -4. 32495900 |
| H | -4. 73380100 | 1. 60737100  | -5. 08958300 |
| C | -3. 74865900 | 3. 50803600  | -4. 71308100 |
| H | -3. 64736500 | 3. 74941400  | -5. 76759200 |
| C | -3. 29405900 | 4. 37418400  | -3. 75756800 |
| H | -2. 83162000 | 5. 31790200  | -4. 03703300 |
| C | -4. 49165300 | 1. 95182800  | -3. 00291500 |
| H | -4. 96976100 | 1. 01829800  | -2. 73165200 |
| N | -0. 62234700 | -0. 73384000 | -1. 49542300 |
| S | -0. 02501800 | 0. 50780300  | -2. 29364800 |
| O | 0. 79107100  | 1. 40895400  | -1. 42154500 |
| O | -0. 91657300 | 1. 17186000  | -3. 24749100 |
| C | 1. 25566700  | -0. 36775200 | -3. 32690400 |
| F | 2. 25640800  | -0. 81187200 | -2. 55500000 |
| F | 1. 75404900  | 0. 50754300  | -4. 20695500 |
| F | 0. 72729400  | -1. 39665200 | -3. 99648900 |
| C | -0. 58215500 | 0. 60714600  | 4. 42218700  |

|   |             |             |             |
|---|-------------|-------------|-------------|
| C | -0.37788400 | 2.11550200  | 4.05654400  |
| H | -0.81375000 | 2.70787600  | 4.87728700  |
| H | -1.00080400 | 2.34307700  | 3.19049900  |
| C | 1.19442100  | 3.61948800  | 2.69760700  |
| C | 0.50556900  | 3.45203300  | 1.47581600  |
| C | 2.11480600  | 4.68745200  | 2.80248700  |
| C | 0.76279300  | 4.28984000  | 0.39358200  |
| H | -0.19707700 | 2.63767700  | 1.33588800  |
| C | 2.34401600  | 5.54147800  | 1.73012500  |
| H | 2.62070600  | 4.87278500  | 3.74469200  |
| C | 1.67805900  | 5.33743400  | 0.51775400  |
| H | 0.25293000  | 4.10550700  | -0.54601800 |
| H | 3.04293200  | 6.36603800  | 1.83811100  |
| H | 1.87089900  | 5.99475700  | -0.32565800 |
| C | 0.99897700  | 2.69420900  | 3.82542100  |
| C | 0.39794200  | -0.34194100 | 3.66422500  |
| H | 1.28225500  | -0.54229300 | 4.26725400  |
| H | -0.10553100 | -1.30197100 | 3.50222800  |
| N | 0.86010200  | 0.13671000  | 2.35843200  |
| C | 2.13610100  | 0.19407500  | 1.95556100  |
| N | 2.37542200  | 0.40331900  | 0.64747500  |
| C | 3.65444800  | 0.50338400  | 0.03180400  |
| C | 3.93690900  | 1.62271800  | -0.75331400 |
| C | 4.58573100  | -0.53173000 | 0.14204700  |
| C | 5.16952900  | 1.71389800  | -1.40198800 |
| C | 5.81446100  | -0.42472900 | -0.50645600 |
| H | 4.34097200  | -1.41988900 | 0.71003500  |
| C | 6.11661300  | 0.69862500  | -1.27777500 |
| H | 7.07258700  | 0.77665200  | -1.78238700 |
| C | 6.79927000  | -1.56253700 | -0.44645300 |
| C | 5.50667000  | 2.95809800  | -2.18237100 |
| F | 6.69607000  | -2.37264500 | -1.52796800 |
| F | 8.07387500  | -1.11775900 | -0.41538900 |
| F | 6.61198200  | -2.34024000 | 0.64402700  |
| F | 6.06989900  | 3.90002000  | -1.38798700 |
| F | 6.38786600  | 2.70399600  | -3.17396000 |
| F | 4.41199400  | 3.51583800  | -2.73753900 |
| S | 3.45340600  | 0.12029200  | 3.10685600  |
| H | 3.19440000  | 2.40408100  | -0.86379300 |
| H | 1.59133100  | 0.63388900  | 0.01241900  |
| H | 0.10842300  | 0.22821300  | 1.64747400  |
| C | 2.08122500  | 2.36769400  | 4.64284700  |
| H | 1.88919900  | 1.92295100  | 5.61580100  |
| H | 2.66321700  | 1.30350100  | 3.98970400  |

|   |             |             |            |
|---|-------------|-------------|------------|
| H | 2.96957600  | 2.99643700  | 4.60056400 |
| C | -2.04125600 | 0.26177200  | 4.04602500 |
| H | -2.74082300 | 0.93424900  | 4.55791700 |
| H | -2.27951000 | -0.76337400 | 4.35323100 |
| H | -2.20494600 | 0.34232600  | 2.96788400 |
| C | -0.41585100 | 0.33013400  | 5.93218600 |
| H | -0.60546100 | -0.72919300 | 6.14281700 |
| H | -1.13608500 | 0.91545900  | 6.51544000 |
| H | 0.58736800  | 0.55733900  | 6.30576500 |

TS-EF-1R-4

1 imaginary frequencies

H = -5198.723060

G = -5198.916123

E(M06-2X-DCM) = 5199.558647

|   |             |             |             |
|---|-------------|-------------|-------------|
| O | -3.12427100 | 0.20378000  | -0.97075300 |
| O | -2.35951700 | -1.54092800 | 0.78266200  |
| P | -1.80877100 | -0.30372500 | -0.14065400 |
| O | -1.25083000 | 0.70971900  | 0.81785000  |
| C | -6.47952700 | 1.59802900  | 1.10994400  |
| C | -6.27221800 | 0.23436600  | 0.93140400  |
| C | -5.19064400 | -0.23151900 | 0.16795700  |
| C | -4.45186600 | 2.07128900  | -0.17886400 |
| C | -5.59135200 | 2.49956800  | 0.52503600  |
| C | -2.86782600 | -2.69617600 | 0.19131900  |
| C | -4.17740300 | -2.70311800 | -0.28599000 |
| C | -4.62519600 | -3.80392200 | -1.03366800 |
| C | -3.82478500 | -4.93044600 | -1.18830500 |
| C | -2.56760100 | -4.95521000 | -0.58509400 |
| C | -2.05354900 | -3.84288600 | 0.10223700  |
| H | -5.76246000 | 3.56722800  | 0.62533500  |
| H | -1.94896100 | -5.84445000 | -0.66161900 |
| C | -5.33500800 | -1.73272100 | -0.06528800 |
| C | -6.15560100 | -2.12909300 | 1.20964900  |
| H | -5.46210300 | -2.24761800 | 2.05041600  |
| H | -6.69198700 | -3.07465300 | 1.08451700  |
| H | -6.77107500 | -4.12901400 | -1.05689900 |
| H | -6.09018200 | -3.81201000 | -2.64866200 |
| C | -4.25300600 | 0.68243100  | -0.31157600 |
| H | -7.32675500 | 1.96169000  | 1.68613000  |
| H | -4.17349700 | -5.78725700 | -1.75930400 |
| C | -7.08503700 | -0.92395200 | 1.46700800  |
| H | -7.33947900 | -0.80396800 | 2.52647400  |
| H | -8.03584700 | -1.02845400 | 0.92571400  |

|   |             |             |             |
|---|-------------|-------------|-------------|
| C | -6.00864000 | -3.54313200 | -1.58927800 |
| C | -6.18807800 | -2.02890900 | -1.34453600 |
| H | -5.76767700 | -1.46504800 | -2.18505400 |
| H | -7.23380700 | -1.72730100 | -1.22925400 |
| C | -0.70449000 | -3.94350600 | 0.74257300  |
| C | 0.44610600  | -4.15841800 | -0.05633700 |
| C | -0.59205100 | -3.93010200 | 2.15685000  |
| C | 0.40840900  | -4.13810900 | -1.48787700 |
| C | 1.72642500  | -4.38845200 | 0.57606400  |
| C | 0.70093000  | -4.12797800 | 2.77397800  |
| C | 1.53418000  | -4.36545600 | -2.23460400 |
| H | -0.52374900 | -3.89686900 | -1.98146300 |
| C | 2.87568600  | -4.63417900 | -0.24079000 |
| C | 1.82086500  | -4.35856500 | 1.96968700  |
| C | 2.78452400  | -4.63215900 | -1.60757300 |
| H | 1.47902900  | -4.31527800 | -3.31781200 |
| H | 3.83030300  | -4.81123600 | 0.24927000  |
| H | 2.78741800  | -4.52543400 | 2.44092100  |
| H | 3.66910000  | -4.79935400 | -2.21480100 |
| C | -3.53494800 | 3.09014600  | -0.77644400 |
| C | -2.88625100 | 4.03045400  | 0.06351900  |
| C | -3.38556500 | 3.17445900  | -2.18389900 |
| C | -2.97244100 | 3.99092400  | 1.49378300  |
| C | -2.09202900 | 5.08611700  | -0.52358400 |
| C | -2.55362700 | 4.21003900  | -2.75288400 |
| C | -2.37152800 | 4.94509500  | 2.27463500  |
| H | -3.52394600 | 3.18413600  | 1.96162100  |
| C | -1.47925800 | 6.05914400  | 0.32707500  |
| C | -1.93899500 | 5.14005400  | -1.91106600 |
| C | -1.62064200 | 6.00257000  | 1.68687200  |
| H | -2.46687400 | 4.89383900  | 3.35654200  |
| H | -0.89467400 | 6.85002000  | -0.13709800 |
| H | -1.33310800 | 5.93160900  | -2.34786900 |
| H | -1.15542100 | 6.75291200  | 2.32060500  |
| C | -1.57465500 | -3.75129500 | 4.39207900  |
| H | -2.44963300 | -3.62555300 | 5.02460000  |
| C | -1.71668300 | -3.75775900 | 3.02792300  |
| H | -2.70238100 | -3.64166700 | 2.59282600  |
| C | -0.29412800 | -3.92272600 | 4.99191300  |
| H | -0.19994500 | -3.91858900 | 6.07466000  |
| C | 0.80752100  | -4.10898300 | 4.20074900  |
| H | 1.79021600  | -4.25540600 | 4.64301400  |
| C | -3.87785200 | 2.39694400  | -4.44858800 |
| H | -4.39292300 | 1.70810800  | -5.11270500 |

|   |             |             |             |
|---|-------------|-------------|-------------|
| C | -3.03209700 | 3.40014800  | -5.00015800 |
| H | -2.90193300 | 3.46345000  | -6.07705700 |
| C | -2.39562300 | 4.28315700  | -4.17203900 |
| H | -1.75565500 | 5.06318200  | -4.57776000 |
| C | -4.05153500 | 2.29238800  | -3.09379100 |
| H | -4.71008200 | 1.52840500  | -2.69845900 |
| N | -0.84331600 | -0.96409800 | -1.24571200 |
| S | 0.08479000  | -0.12129200 | -2.21906500 |
| O | 1.50293700  | -0.51472100 | -2.03573300 |
| O | -0.20037000 | 1.32088400  | -2.31289100 |
| C | -0.37434100 | -0.80891500 | -3.89242100 |
| F | -0.19166200 | -2.13602200 | -3.94190300 |
| F | 0.39308600  | -0.23733000 | -4.82672800 |
| F | -1.65600500 | -0.54201200 | -4.15722200 |
| C | -0.16969100 | 0.99817400  | 4.27364500  |
| C | 0.19367700  | 2.39302200  | 3.65886700  |
| H | -0.13791300 | 3.15379900  | 4.38331000  |
| H | -0.43599900 | 2.54737400  | 2.78251600  |
| C | 1.90037900  | 3.40778300  | 2.01875900  |
| C | 1.12464200  | 3.13932800  | 0.86819400  |
| C | 3.00438800  | 4.28325900  | 1.88454400  |
| C | 1.47390200  | 3.67354600  | -0.36984600 |
| H | 0.27238600  | 2.47008300  | 0.90868900  |
| C | 3.33263800  | 4.83819100  | 0.65301900  |
| H | 3.58557300  | 4.55972700  | 2.75835400  |
| C | 2.57719300  | 4.52210300  | -0.48097300 |
| H | 0.88762800  | 3.39994000  | -1.24130200 |
| H | 4.18150700  | 5.51102200  | 0.57491900  |
| H | 2.84896800  | 4.93844300  | -1.44705900 |
| C | 1.61897800  | 2.75648700  | 3.30829800  |
| C | 0.59594300  | -0.19519300 | 3.60717200  |
| H | 1.44372500  | -0.49425300 | 4.22212200  |
| H | -0.08268300 | -1.05311300 | 3.55022300  |
| N | 1.11128500  | 0.03968400  | 2.25430800  |
| C | 2.38121500  | -0.12874300 | 1.86309000  |
| N | 2.64447200  | -0.23264300 | 0.54740100  |
| C | 3.94043500  | -0.17290100 | -0.05305900 |
| C | 4.72158700  | 0.98140200  | 0.03237300  |
| C | 4.37783100  | -1.26524200 | -0.79774600 |
| C | 5.96204800  | 1.01863900  | -0.60196100 |
| C | 5.62092200  | -1.21336400 | -1.43266000 |
| H | 3.74931900  | -2.14472700 | -0.88202200 |
| C | 6.42178300  | -0.07832400 | -1.33471900 |
| H | 7.38381200  | -0.04159900 | -1.83017000 |

|   |             |             |             |
|---|-------------|-------------|-------------|
| C | 6.07286000  | -2.41636900 | -2.21900700 |
| C | 6.82419100  | 2.24462000  | -0.45621400 |
| F | 5.24548600  | -2.67675100 | -3.25466500 |
| F | 7.31558700  | -2.26286900 | -2.72078200 |
| F | 6.08435400  | -3.53146000 | -1.44673900 |
| F | 7.51081900  | 2.23580400  | 0.71000500  |
| F | 7.73244600  | 2.34598500  | -1.44933400 |
| F | 6.08567400  | 3.37899400  | -0.46272100 |
| S | 3.69142200  | -0.17468300 | 3.01994900  |
| H | 4.35709600  | 1.84364900  | 0.57785900  |
| H | 1.89400200  | -0.40101200 | -0.13554900 |
| H | 0.37472000  | 0.19068700  | 1.54361700  |
| C | 2.67217100  | 2.45505700  | 4.17130200  |
| H | 2.45105000  | 2.22921500  | 5.21048400  |
| H | 3.08544700  | 1.21355300  | 3.71615900  |
| H | 3.63509700  | 2.93703000  | 4.01074000  |
| C | -1.69203700 | 0.82361700  | 4.06467600  |
| H | -2.24170700 | 1.65098000  | 4.53064900  |
| H | -2.03466800 | -0.10802200 | 4.53001300  |
| H | -1.94438800 | 0.79052000  | 3.00200000  |
| C | 0.09197500  | 0.91874500  | 5.79415700  |
| H | -0.26031500 | -0.04442400 | 6.18243100  |
| H | -0.45509400 | 1.70648200  | 6.32509700  |
| H | 1.15034900  | 1.00031300  | 6.05841200  |

TS-EF-1R-5

l imaginary frequencies

H = -5198.730764

G = -5198.922840

E(M06-2X-DCM) = -5199.559918

|   |             |             |             |
|---|-------------|-------------|-------------|
| O | -3.08809100 | 0.01473100  | -0.29653300 |
| O | -1.61264900 | -2.09961200 | -0.11395900 |
| P | -1.51985700 | -0.47774000 | -0.27777000 |
| O | -0.77335200 | 0.05207800  | 0.90431600  |
| C | -5.49921700 | -0.95532000 | 2.99349300  |
| C | -5.33587200 | -1.84943000 | 1.94128000  |
| C | -4.57313000 | -1.50325000 | 0.81515400  |
| C | -4.05589200 | 0.64985600  | 1.84151900  |
| C | -4.87681500 | 0.28957700  | 2.92381600  |
| C | -2.18102100 | -2.87239200 | -1.12665800 |
| C | -3.56833100 | -2.95876000 | -1.22847200 |
| C | -4.13383100 | -3.56831900 | -2.35921100 |
| C | -3.32860100 | -4.20954400 | -3.29441100 |
| C | -1.94844100 | -4.23954100 | -3.09258600 |



|   |             |             |             |
|---|-------------|-------------|-------------|
| C | -1.33920700 | -3.56005100 | -2.02385500 |
| H | -5.00109000 | 1.00232700  | 3.73392300  |
| H | -1.31313000 | -4.77750500 | -3.78980900 |
| C | -4.67665300 | -2.59833500 | -0.24217500 |
| C | -5.00167900 | -3.83110500 | 0.67243500  |
| H | -4.06258000 | -4.21940900 | 1.08329600  |
| H | -5.48507400 | -4.64362100 | 0.12166300  |
| H | -6.14881300 | -4.34790900 | -2.13227700 |
| H | -6.02132300 | -3.06138200 | -3.32608700 |
| C | -3.90438400 | -0.27920100 | 0.79357600  |
| H | -6.09596400 | -1.22081600 | 3.86250600  |
| H | -3.76344200 | -4.69529100 | -4.16445400 |
| C | -5.86703400 | -3.25920600 | 1.81317800  |
| H | -5.77488800 | -3.83040700 | 2.74395800  |
| H | -6.93347600 | -3.26007400 | 1.54630800  |
| C | -5.63900200 | -3.40044200 | -2.35635200 |
| C | -5.86177400 | -2.36045200 | -1.23416300 |
| H | -5.78056000 | -1.34721400 | -1.64389700 |
| H | -6.83881200 | -2.44863600 | -0.74824900 |
| C | 0.14547400  | -3.62824200 | -1.85389300 |
| C | 1.00212100  | -3.14709100 | -2.87641300 |
| C | 0.69560900  | -4.26079400 | -0.70889000 |
| C | 0.51868300  | -2.47323800 | -4.04457900 |
| C | 2.43219200  | -3.32263800 | -2.75266600 |
| C | 2.13040500  | -4.37589600 | -0.57481000 |
| C | 1.36811100  | -2.07390700 | -5.04285000 |
| H | -0.53902200 | -2.25469500 | -4.12111500 |
| C | 3.28451900  | -2.89703100 | -3.81987500 |
| C | 2.95815900  | -3.90887400 | -1.59892800 |
| C | 2.76972700  | -2.30572800 | -4.94287700 |
| H | 0.97137400  | -1.55641600 | -5.91149700 |
| H | 4.35435900  | -3.06757900 | -3.71951800 |
| H | 4.03697500  | -4.00380600 | -1.49448500 |
| H | 3.42552900  | -2.00041400 | -5.75463800 |
| C | -3.40346300 | 1.99721200  | 1.86765100  |
| C | -2.40760400 | 2.27006500  | 2.83704300  |
| C | -3.85872600 | 3.02516400  | 1.00700400  |
| C | -1.87846300 | 1.26258300  | 3.70814300  |
| C | -1.88172900 | 3.61014500  | 2.96613700  |
| C | -3.31452400 | 4.35816100  | 1.13581700  |
| C | -0.92626300 | 1.55821100  | 4.64925000  |
| H | -2.23151900 | 0.24441300  | 3.59986700  |
| C | -0.89356200 | 3.87849900  | 3.96641100  |
| C | -2.35194500 | 4.61635000  | 2.11665300  |

|   |             |             |             |
|---|-------------|-------------|-------------|
| C | -0.42876700 | 2.88650400  | 4.78705100  |
| H | -0.53760800 | 0.77010300  | 5.28914200  |
| H | -0.51927800 | 4.89567400  | 4.06047000  |
| H | -1.97078200 | 5.62995700  | 2.23164600  |
| H | 0.32306700  | 3.10441100  | 5.54065400  |
| C | 0.45586600  | -5.41524000 | 1.43481500  |
| H | -0.18158300 | -5.82858900 | 2.21152100  |
| C | -0.10751000 | -4.82669400 | 0.33347600  |
| H | -1.18652700 | -4.79052000 | 0.24220300  |
| C | 1.87010100  | -5.49067600 | 1.57712400  |
| H | 2.29749500  | -5.95306400 | 2.46278100  |
| C | 2.68028600  | -4.99037000 | 0.59448400  |
| H | 3.76229400  | -5.04090400 | 0.68621000  |
| C | -5.29998500 | 3.83211900  | -0.79378400 |
| H | -6.06632000 | 3.64178900  | -1.54020500 |
| C | -4.75273800 | 5.14055300  | -0.66991300 |
| H | -5.10572800 | 5.93559300  | -1.32124500 |
| C | -3.79174300 | 5.39266200  | 0.27142700  |
| H | -3.37490300 | 6.39115400  | 0.38467000  |
| C | -4.87219200 | 2.81479600  | 0.01817900  |
| H | -5.30385800 | 1.82599500  | -0.08509400 |
| N | -0.99832200 | -0.22795700 | -1.78887700 |
| S | -0.59020400 | 1.14402900  | -2.43562800 |
| O | 0.44823800  | 0.97986900  | -3.46184100 |
| O | -0.38817300 | 2.26358700  | -1.46938900 |
| C | -2.09000300 | 1.69709200  | -3.40383000 |
| F | -2.39414400 | 0.78916900  | -4.33757500 |
| F | -1.81831500 | 2.86317000  | -4.00808300 |
| F | -3.14213200 | 1.86390500  | -2.59912500 |
| C | 1.54959800  | 5.48212600  | -0.62499000 |
| C | 2.54636300  | 4.85256400  | -1.65253300 |
| H | 2.87032300  | 5.66160700  | -2.32881000 |
| H | 1.98590500  | 4.17043900  | -2.29342600 |
| C | 4.26837800  | 2.99463400  | -1.97924600 |
| C | 3.34319800  | 2.08587500  | -2.54016600 |
| C | 5.64890600  | 2.72483500  | -2.13780600 |
| C | 3.77793400  | 0.94102500  | -3.20031900 |
| H | 2.27538100  | 2.22435900  | -2.42584000 |
| C | 6.07876300  | 1.59488600  | -2.82180700 |
| H | 6.38434000  | 3.43002100  | -1.76398800 |
| C | 5.14441500  | 0.69417400  | -3.34502100 |
| H | 3.03960100  | 0.24888100  | -3.59082800 |
| H | 7.14241900  | 1.41543900  | -2.94983900 |
| H | 5.48016300  | -0.19797800 | -3.86601000 |

|   |              |              |              |
|---|--------------|--------------|--------------|
| C | 3. 81953900  | 4. 16609800  | -1. 22329400 |
| C | 1. 40530500  | 4. 64454300  | 0. 67824300  |
| H | 2. 18211400  | 4. 90585900  | 1. 39625400  |
| H | 0. 44285400  | 4. 89868500  | 1. 14070500  |
| N | 1. 44877700  | 3. 19362700  | 0. 50000700  |
| C | 2. 14976700  | 2. 32883400  | 1. 25750600  |
| N | 1. 72265000  | 1. 05567500  | 1. 26534500  |
| C | 2. 39671300  | -0. 05116600 | 1. 85813400  |
| C | 3. 59926200  | -0. 52931500 | 1. 33744000  |
| C | 1. 77419700  | -0. 71202500 | 2. 91889100  |
| C | 4. 19295300  | -1. 65659300 | 1. 90677700  |
| C | 2. 38070000  | -1. 83370400 | 3. 48193400  |
| H | 0. 82490600  | -0. 34340500 | 3. 28894700  |
| C | 3. 59448700  | -2. 30815600 | 2. 98490200  |
| H | 4. 06007800  | -3. 18265800 | 3. 42214000  |
| C | 1. 69351100  | -2. 57305000 | 4. 59986600  |
| C | 5. 50067500  | -2. 15618200 | 1. 35341500  |
| F | 0. 91472300  | -1. 75125000 | 5. 34125600  |
| F | 0. 89572300  | -3. 56034300 | 4. 13761500  |
| F | 2. 58575300  | -3. 14885200 | 5. 43716800  |
| F | 6. 55417700  | -1. 46193200 | 1. 83975100  |
| F | 5. 71462000  | -3. 45828200 | 1. 65511200  |
| F | 5. 54801200  | -2. 04314500 | 0. 00568900  |
| S | 3. 55267100  | 2. 81057000  | 2. 16621800  |
| H | 4. 05145100  | -0. 03883000 | 0. 48323500  |
| H | 0. 74066300  | 0. 84097600  | 0. 98914000  |
| H | 0. 71179300  | 2. 78468100  | -0. 08963800 |
| C | 4. 55903500  | 4. 59035700  | -0. 11007500 |
| H | 4. 39655500  | 5. 59653800  | 0. 26825000  |
| H | 4. 07776500  | 3. 85049900  | 0. 86816700  |
| H | 5. 58951200  | 4. 24587600  | -0. 02535700 |
| C | 0. 18604700  | 5. 57561200  | -1. 34918300 |
| H | 0. 28227600  | 6. 15999800  | -2. 27240700 |
| H | -0. 55184100 | 6. 07864000  | -0. 71377200 |
| H | -0. 20950700 | 4. 59043000  | -1. 61238000 |
| C | 1. 95203900  | 6. 91424300  | -0. 21043500 |
| H | 1. 21229600  | 7. 32999100  | 0. 48416200  |
| H | 1. 98547700  | 7. 57337900  | -1. 08530000 |
| H | 2. 92611800  | 6. 96498500  | 0. 28617400  |

INT-5

0 imaginary frequencies

H = -5198. 727929

G = -5198. 920989

E(M06-2X-DCM) = -5199.571873

|   |            |             |             |
|---|------------|-------------|-------------|
| O | 1.79612400 | -2.18878600 | -0.14599200 |
| O | 3.10133000 | -0.00075200 | 0.35457400  |
| P | 1.59550900 | -0.56597000 | 0.01701100  |
| O | 0.73979200 | -0.21007500 | 1.19336700  |
| C | 3.18561700 | -4.35713100 | 3.16340200  |
| C | 4.07176700 | -3.69161400 | 2.32354000  |
| C | 3.60935300 | -3.03304500 | 1.17419700  |
| C | 1.31858600 | -3.64521000 | 1.74601200  |
| C | 1.82799500 | -4.35655900 | 2.84673400  |
| C | 4.14037700 | -0.17410600 | -0.55775800 |
| C | 4.80013200 | -1.40175900 | -0.62610600 |
| C | 5.72598600 | -1.62654400 | -1.65757500 |
| C | 6.08266000 | -0.60381000 | -2.52882800 |
| C | 5.51175300 | 0.65574100  | -2.35819600 |
| C | 4.52591500 | 0.89918400  | -1.38608100 |
| H | 1.12780000 | -4.90191500 | 3.47261800  |
| H | 5.81350200 | 1.47657200  | -3.00180700 |
| C | 4.79346500 | -2.60118000 | 0.31767400  |
| C | 5.89136300 | -2.44280300 | 1.42449900  |
| H | 5.77711800 | -1.45848400 | 1.89362900  |
| H | 6.90617000 | -2.50279100 | 1.01926100  |
| H | 7.24047200 | -3.13030600 | -1.26907300 |
| H | 6.20376800 | -3.51367300 | -2.63897600 |
| C | 2.23823000 | -2.94987600 | 0.93476900  |
| H | 3.54111200 | -4.88145400 | 4.04700200  |
| H | 6.80528400 | -0.77399600 | -3.32287500 |
| C | 5.57264300 | -3.54938500 | 2.45235800  |
| H | 5.88420800 | -3.28489800 | 3.46954000  |
| H | 6.08527600 | -4.48867700 | 2.20148600  |
| C | 6.20855400 | -3.06051200 | -1.64104700 |
| C | 5.21314300 | -3.73694000 | -0.67475200 |
| H | 4.32511600 | -4.06519200 | -1.22674000 |
| H | 5.62880000 | -4.60898300 | -0.16040600 |
| C | 4.00087000 | 2.29402200  | -1.25456700 |
| C | 3.34726600 | 2.90476600  | -2.35490600 |
| C | 4.28993600 | 3.05567900  | -0.09226300 |
| C | 2.95538000 | 2.17338900  | -3.52335300 |
| C | 3.04011400 | 4.31761500  | -2.31383300 |
| C | 3.92230700 | 4.45448000  | -0.04311300 |
| C | 2.36231700 | 2.79954600  | -4.58861600 |
| H | 3.09459700 | 1.09978400  | -3.53910800 |
| C | 2.43821900 | 4.93558900  | -3.45527600 |
| C | 3.32662000 | 5.05033100  | -1.15868000 |

|   |              |              |              |
|---|--------------|--------------|--------------|
| C | 2. 11807900  | 4. 20253200  | -4. 56634200 |
| H | 2. 05394900  | 2. 21565300  | -5. 45067700 |
| H | 2. 23478900  | 6. 00325800  | -3. 41507200 |
| H | 3. 08726500  | 6. 11171500  | -1. 12969600 |
| H | 1. 65894700  | 4. 68236100  | -5. 42662200 |
| C | -0. 15091200 | -3. 69073900 | 1. 47302600  |
| C | -1. 06024900 | -3. 15435800 | 2. 41823200  |
| C | -0. 63501600 | -4. 36030100 | 0. 32154400  |
| C | -0. 63964700 | -2. 48767600 | 3. 61527500  |
| C | -2. 48253400 | -3. 28180700 | 2. 19315000  |
| C | -2. 05908900 | -4. 44282800 | 0. 08923200  |
| C | -1. 54854800 | -2. 03212100 | 4. 53576800  |
| H | 0. 42072400  | -2. 34824000 | 3. 78932200  |
| C | -3. 39629000 | -2. 77142100 | 3. 16827200  |
| C | -2. 94262900 | -3. 90495200 | 1. 02970600  |
| C | -2. 94844200 | -2. 17304500 | 4. 31438800  |
| H | -1. 19970200 | -1. 55322900 | 5. 44754800  |
| H | -4. 46161500 | -2. 87469400 | 2. 97717600  |
| H | -4. 01296000 | -3. 97500600 | 0. 85154000  |
| H | -3. 65267500 | -1. 79299800 | 5. 04857300  |
| C | 5. 23654000  | 3. 27791900  | 2. 15413800  |
| H | 5. 76235600  | 2. 83884500  | 2. 99784500  |
| C | 4. 97381300  | 2. 51575300  | 1. 04506900  |
| H | 5. 29539100  | 1. 48162500  | 1. 01940600  |
| C | 4. 84073300  | 4. 64527500  | 2. 20895300  |
| H | 5. 06118700  | 5. 23585500  | 3. 09436800  |
| C | 4. 20719600  | 5. 21329300  | 1. 13656500  |
| H | 3. 92101000  | 6. 26272400  | 1. 15279100  |
| C | -0. 27736900 | -5. 64579100 | -1. 72499000 |
| H | 0. 40077900  | -6. 12644300 | -2. 42510900 |
| C | -1. 67891900 | -5. 68343100 | -1. 97096600 |
| H | -2. 05658600 | -6. 18053700 | -2. 86028600 |
| C | -2. 54320100 | -5. 09865200 | -1. 08616200 |
| H | -3. 61543700 | -5. 11408300 | -1. 25956500 |
| C | 0. 22533000  | -5. 00512300 | -0. 62321800 |
| H | 1. 29599200  | -4. 98707700 | -0. 45522000 |
| C | 0. 57717400  | 2. 42671400  | 3. 91045200  |
| C | 0. 60659100  | 3. 43556300  | 2. 68801700  |
| H | 1. 16058900  | 4. 32767800  | 3. 02098600  |
| H | 1. 20007700  | 2. 97720000  | 1. 89928300  |
| C | -1. 01369100 | 3. 91928800  | 0. 74500400  |
| C | -0. 06522000 | 3. 55267100  | -0. 25072900 |
| C | -2. 33577200 | 4. 24075400  | 0. 31740400  |
| C | -0. 42522100 | 3. 49553800  | -1. 58635000 |

|   |             |             |             |
|---|-------------|-------------|-------------|
| H | 0.95622300  | 3.31413200  | 0.01645200  |
| C | -2.69617900 | 4.15204500  | -1.01668600 |
| H | -3.09143200 | 4.51000000  | 1.04493600  |
| C | -1.74277300 | 3.77278800  | -1.96941900 |
| H | 0.29687700  | 3.18588400  | -2.32900900 |
| H | -3.72315300 | 4.34497700  | -1.31116200 |
| H | -2.02412300 | 3.67457600  | -3.01327300 |
| C | -0.70100500 | 3.91665800  | 2.14358700  |
| C | -0.70881100 | 1.55079000  | 3.88566300  |
| H | -1.52168500 | 2.02131400  | 4.43942200  |
| H | -0.49170500 | 0.59485300  | 4.37834100  |
| N | -1.19362600 | 1.29045300  | 2.53525400  |
| C | -2.50876000 | 1.15163900  | 2.19065900  |
| N | -2.69296700 | 0.56408300  | 0.97337900  |
| C | -3.90662000 | 0.40282600  | 0.25777700  |
| C | -4.85218200 | 1.42690300  | 0.14713800  |
| C | -4.11138300 | -0.79715900 | -0.43113600 |
| C | -5.99325700 | 1.24082600  | -0.63120800 |
| C | -5.26513800 | -0.97349800 | -1.19635500 |
| H | -3.36189300 | -1.57771800 | -0.38522000 |
| C | -6.21752700 | 0.03882700  | -1.30212600 |
| H | -7.10317800 | -0.09809200 | -1.90921400 |
| C | -5.47583900 | -2.29525300 | -1.88723000 |
| C | -6.98433400 | 2.36839000  | -0.72693900 |
| F | -4.38240000 | -2.68848100 | -2.56887000 |
| F | -6.50991000 | -2.25978700 | -2.75400700 |
| F | -5.74860000 | -3.28533800 | -0.99229100 |
| F | -7.74769100 | 2.47183400  | 0.38252500  |
| F | -7.82077000 | 2.22623100  | -1.77574300 |
| F | -6.35691500 | 3.56733800  | -0.87296300 |
| S | -3.77538700 | 1.72440000  | 3.17561500  |
| H | -4.69089000 | 2.36759600  | 0.65192500  |
| H | -1.88994200 | 0.11978300  | 0.51851700  |
| H | -0.51095200 | 0.79761800  | 1.93593200  |
| C | -1.66565400 | 4.50455000  | 3.10293900  |
| H | -1.19906100 | 4.75997200  | 4.05257600  |
| H | -2.46484900 | 3.75037400  | 3.30936900  |
| H | -2.17152800 | 5.38597900  | 2.70343400  |
| N | 1.26556300  | -0.01290100 | -1.46275500 |
| S | -0.12399500 | -0.22262200 | -2.20589600 |
| O | -0.43046400 | 0.91089000  | -3.08885000 |
| O | -1.20966500 | -0.72850900 | -1.33103500 |
| C | 0.21901200  | -1.60887300 | -3.41205500 |
| F | 1.19678600  | -1.23841700 | -4.25309800 |

|   |             |             |             |
|---|-------------|-------------|-------------|
| F | -0.88389000 | -1.86586700 | -4.12372800 |
| F | 0.59787500  | -2.72050900 | -2.77851800 |
| C | 1.84168600  | 1.54947800  | 3.77426900  |
| H | 2.74130700  | 2.17355500  | 3.72099500  |
| H | 1.93833800  | 0.89561000  | 4.64940300  |
| H | 1.80713500  | 0.92129400  | 2.88039800  |
| C | 0.65213000  | 3.13611100  | 5.27879400  |
| H | 0.66828400  | 2.38970100  | 6.08165400  |
| H | 1.57294100  | 3.72459800  | 5.36195900  |
| H | -0.19644100 | 3.79806800  | 5.47527700  |

INT-6

0 imaginary frequencies

H = -5198.745139

G = -5198.932271

E(M06-2X-DCM) = -5199.602155

|   |             |             |             |
|---|-------------|-------------|-------------|
| O | -1.38398100 | 2.35093500  | -0.20506800 |
| O | -2.96810100 | 0.34501400  | 0.28306000  |
| P | -1.42826000 | 0.71196000  | -0.15756000 |
| O | -0.53758100 | 0.13529000  | 0.90747700  |
| C | -2.47401100 | 4.66285100  | 3.12317100  |
| C | -3.44238900 | 4.11096200  | 2.29239400  |
| C | -3.07798100 | 3.39958600  | 1.13817800  |
| C | -0.72442500 | 3.74010600  | 1.67959300  |
| C | -1.13107200 | 4.50497400  | 2.78709000  |
| C | -4.03292200 | 0.64079100  | -0.57386900 |
| C | -4.50441100 | 1.95043200  | -0.64927100 |
| C | -5.41826000 | 2.29581900  | -1.65696500 |
| C | -5.95719600 | 1.32070300  | -2.48822100 |
| C | -5.59501700 | -0.00991700 | -2.28619000 |
| C | -4.62662100 | -0.38389900 | -1.33788500 |
| H | -0.36333800 | 4.97280600  | 3.39616400  |
| H | -6.05433700 | -0.79085800 | -2.88456900 |
| C | -4.31514200 | 3.13768800  | 0.28754600  |
| C | -5.41919400 | 3.12707900  | 1.40036000  |
| H | -5.44000100 | 2.13353900  | 1.86348800  |
| H | -6.41738800 | 3.32808000  | 0.99998700  |
| H | -6.68551600 | 4.01547900  | -1.27437800 |
| H | -5.61581100 | 4.22325000  | -2.65624200 |
| C | -1.72922600 | 3.14625800  | 0.88732000  |
| H | -2.75462900 | 5.22803400  | 4.00846000  |
| H | -6.66932000 | 1.58166800  | -3.26694600 |
| C | -4.94727800 | 4.17195900  | 2.43188700  |
| H | -5.28479800 | 3.94562300  | 3.44999700  |

|   |             |             |             |
|---|-------------|-------------|-------------|
| H | -5.32785800 | 5.17439500  | 2.19075000  |
| C | -5.67943400 | 3.78669100  | -1.65292400 |
| C | -4.58374700 | 4.31916000  | -0.70335200 |
| H | -3.66628700 | 4.51813200  | -1.26881200 |
| H | -4.86583800 | 5.24213100  | -0.18713400 |
| C | -4.36546100 | -1.84400700 | -1.13745500 |
| C | -3.86994900 | -2.63102800 | -2.20741100 |
| C | -4.77573000 | -2.46825200 | 0.06965100  |
| C | -3.40313700 | -2.05945800 | -3.43486600 |
| C | -3.81799500 | -4.07056900 | -2.07547000 |
| C | -4.66484500 | -3.90445000 | 0.20566500  |
| C | -2.97216800 | -2.84963800 | -4.46878500 |
| H | -3.35487700 | -0.98174500 | -3.52579600 |
| C | -3.37337700 | -4.85853300 | -3.18289700 |
| C | -4.20094200 | -4.66482700 | -0.87089400 |
| C | -2.97379700 | -4.26865300 | -4.35197500 |
| H | -2.59843700 | -2.38570100 | -5.37632700 |
| H | -3.35620400 | -5.94004700 | -3.07027100 |
| H | -4.14838100 | -5.74733700 | -0.77253400 |
| H | -2.63743700 | -4.87751200 | -5.18705300 |
| C | 0.73392500  | 3.65067300  | 1.36488400  |
| C | 1.62279800  | 3.04897600  | 2.28940600  |
| C | 1.23793100  | 4.26636100  | 0.19175600  |
| C | 1.18638800  | 2.44799600  | 3.51566900  |
| C | 3.04172600  | 3.03992400  | 2.01358000  |
| C | 2.65437600  | 4.21380400  | -0.08985100 |
| C | 2.08085800  | 1.92480200  | 4.41408000  |
| H | 0.12498900  | 2.42375700  | 3.73532000  |
| C | 3.93841300  | 2.46828900  | 2.96997400  |
| C | 3.51568800  | 3.59886200  | 0.82353700  |
| C | 3.47878300  | 1.93585000  | 4.14367000  |
| H | 1.72172200  | 1.49184700  | 5.34438700  |
| H | 5.00174100  | 2.47332100  | 2.74302700  |
| H | 4.57975700  | 3.56026100  | 0.60545100  |
| H | 4.17140700  | 1.51219900  | 4.86499500  |
| C | -5.74827800 | -2.38465300 | 2.31497500  |
| H | -6.19204800 | -1.80967100 | 3.12367300  |
| C | -5.35189200 | -1.74870700 | 1.16651000  |
| H | -5.48864600 | -0.67760100 | 1.07552700  |
| C | -5.59680800 | -3.79360400 | 2.45747000  |
| H | -5.91436500 | -4.28103000 | 3.37548800  |
| C | -5.07282200 | -4.52722000 | 1.42758200  |
| H | -4.97140400 | -5.60700700 | 1.51074800  |
| C | 0.92685500  | 5.55328100  | -1.86194600 |



|   |             |             |             |
|---|-------------|-------------|-------------|
| H | 0.27152900  | 6.08664700  | -2.54536900 |
| C | 2.31714300  | 5.46134700  | -2.15412300 |
| H | 2.70779000  | 5.91323700  | -3.06176700 |
| C | 3.15457600  | 4.81105200  | -1.28962600 |
| H | 4.21725800  | 4.72868100  | -1.49835300 |
| C | 0.40705200  | 4.97577900  | -0.73362300 |
| H | -0.65363000 | 5.06166600  | -0.52843800 |
| C | -1.10489400 | -2.01115600 | 3.79986700  |
| C | -1.13925100 | -3.13853100 | 2.71761900  |
| H | -1.52807600 | -4.08096900 | 3.11465300  |
| H | -1.80136600 | -2.84564900 | 1.89962600  |
| C | 0.38967600  | -3.86780100 | 0.75131600  |
| C | -0.36213500 | -3.26945500 | -0.27180400 |
| C | 1.21853700  | -4.95064400 | 0.41345500  |
| C | -0.27555100 | -3.72101700 | -1.58751700 |
| H | -1.01280800 | -2.42730900 | -0.06014700 |
| C | 1.29142400  | -5.41608100 | -0.89951200 |
| H | 1.81142500  | -5.45281800 | 1.16800500  |
| C | 0.54899800  | -4.79974700 | -1.90477300 |
| H | -0.83988800 | -3.21855800 | -2.36448700 |
| H | 1.93775000  | -6.25834800 | -1.13134500 |
| H | 0.61281200  | -5.15075200 | -2.93063700 |
| C | 0.29875500  | -3.35421000 | 2.18686400  |
| C | 0.26682000  | -1.31352800 | 3.57591600  |
| H | 1.00556100  | -1.55760900 | 4.33795700  |
| H | 0.20179500  | -0.22995100 | 3.47708300  |
| N | 0.79503000  | -1.83854600 | 2.25746100  |
| C | 2.25560200  | -1.59681100 | 2.00249300  |
| N | 2.46548700  | -1.25999700 | 0.72096600  |
| C | 3.74163600  | -1.03630200 | 0.12205500  |
| C | 4.78143700  | -1.95700000 | 0.26592300  |
| C | 3.90504200  | 0.09588300  | -0.68008100 |
| C | 5.99437600  | -1.72931000 | -0.38151300 |
| C | 5.12423200  | 0.30550500  | -1.32596100 |
| H | 3.08459800  | 0.78871000  | -0.81463900 |
| C | 6.17482300  | -0.59922700 | -1.17883300 |
| H | 7.11348700  | -0.43814600 | -1.69564700 |
| C | 5.32746600  | 1.54379700  | -2.16094700 |
| C | 7.13362300  | -2.69563900 | -0.18534400 |
| F | 4.17669900  | 1.99717300  | -2.68798800 |
| F | 6.19186400  | 1.32503500  | -3.17455800 |
| F | 5.85238000  | 2.55919900  | -1.42029900 |
| F | 7.90457000  | -2.34653600 | 0.86921800  |
| F | 7.94164600  | -2.74092800 | -1.26638300 |

|   |             |             |             |
|---|-------------|-------------|-------------|
| F | 6.69151400  | -3.95101500 | 0.04791900  |
| S | 3.37262000  | -1.75431100 | 3.21143600  |
| H | 4.64337400  | -2.84997800 | 0.85999100  |
| H | 1.67852000  | -1.05505700 | 0.08645900  |
| H | 0.25492000  | -1.29023100 | 1.54352900  |
| C | 1.10732300  | -4.20800600 | 3.16970700  |
| H | 1.08657900  | -3.80405700 | 4.18043900  |
| H | 2.15341900  | -4.31154600 | 2.88415900  |
| H | 0.65240600  | -5.20288300 | 3.19563900  |
| N | -1.29612000 | 0.27641300  | -1.69915900 |
| S | 0.01350900  | -0.11343900 | -2.49721300 |
| O | -0.32666700 | -0.83030100 | -3.72687800 |
| O | 1.10429300  | -0.67446400 | -1.65829700 |
| C | 0.74299700  | 1.50726100  | -3.07721400 |
| F | -0.18012100 | 2.26636100  | -3.66990700 |
| F | 1.73528500  | 1.27048100  | -3.94088300 |
| F | 1.24151200  | 2.17183600  | -2.02136300 |
| C | -2.26820200 | -1.02504900 | 3.58594700  |
| H | -3.22784400 | -1.54823600 | 3.65530800  |
| H | -2.25348600 | -0.24238200 | 4.35477400  |
| H | -2.21459700 | -0.54374100 | 2.60772000  |
| C | -1.20132300 | -2.56189500 | 5.23690700  |
| H | -1.10034700 | -1.75004800 | 5.96725600  |
| H | -2.18009000 | -3.02789100 | 5.39680800  |
| H | -0.43494500 | -3.30959300 | 5.46332300  |

TS-PT-1S

l imaginary frequencies

H = -5198.731392

G = -5198.917520

E(M06-2X-DCM) = -5199.584425

|   |             |            |             |
|---|-------------|------------|-------------|
| O | -1.25612300 | 2.36449900 | -0.24258000 |
| O | -2.88833000 | 0.40740800 | 0.32971900  |
| P | -1.38887300 | 0.75528800 | -0.18979300 |
| O | -0.45013600 | 0.28633300 | 0.95341000  |
| C | -2.16550600 | 4.79665600 | 3.06033100  |
| C | -3.17803000 | 4.23763700 | 2.28952700  |
| C | -2.87350700 | 3.48961800 | 1.14105600  |
| C | -0.48962300 | 3.80163200 | 1.57388600  |
| C | -0.84137400 | 4.60759100 | 2.67214800  |
| C | -3.98719100 | 0.72693500 | -0.50018100 |
| C | -4.40684700 | 2.05449400 | -0.57329700 |
| C | -5.34337500 | 2.42246100 | -1.55275700 |
| C | -5.94427900 | 1.46028700 | -2.35513400 |

|   |             |             |             |
|---|-------------|-------------|-------------|
| C | -5.62500700 | 0.12031100  | -2.15045900 |
| C | -4.64068200 | -0.28435000 | -1.23055600 |
| H | -0.04150700 | 5.07916000  | 3.23439600  |
| H | -6.13260500 | -0.64922700 | -2.72357900 |
| C | -4.14761000 | 3.24585000  | 0.34243200  |
| C | -5.20912900 | 3.27949800  | 1.49514500  |
| H | -5.23591700 | 2.29482600  | 1.97636800  |
| H | -6.21623200 | 3.49771400  | 1.12783800  |
| H | -6.54353400 | 4.18127000  | -1.14343800 |
| H | -5.51822100 | 4.34457500  | -2.56435900 |
| C | -1.54089800 | 3.20819500  | 0.84761900  |
| H | -2.39832300 | 5.39211300  | 3.93946300  |
| H | -6.67283300 | 1.73998900  | -3.11166800 |
| C | -4.67433400 | 4.33103200  | 2.48855200  |
| H | -4.97336600 | 4.12662000  | 3.52298800  |
| H | -5.04507700 | 5.33698700  | 2.24759700  |
| C | -5.55877400 | 3.91986000  | -1.55493600 |
| C | -4.41535000 | 4.42608300  | -0.65062700 |
| H | -3.51290200 | 4.59304500  | -1.24966900 |
| H | -4.65008300 | 5.36094900  | -0.13284900 |
| C | -4.45031000 | -1.75579500 | -1.03116600 |
| C | -4.01791700 | -2.56597700 | -2.11084700 |
| C | -4.89801400 | -2.35644300 | 0.17410300  |
| C | -3.54538500 | -2.02013900 | -3.34774800 |
| C | -4.04888700 | -4.00608000 | -1.98196800 |
| C | -4.87232700 | -3.79706800 | 0.30491900  |
| C | -3.18201100 | -2.83222600 | -4.39089900 |
| H | -3.44238200 | -0.94649700 | -3.44314500 |
| C | -3.66773500 | -4.81640400 | -3.09671800 |
| C | -4.45530300 | -4.57941600 | -0.77495400 |
| C | -3.25876000 | -4.24911000 | -4.27360400 |
| H | -2.80527700 | -2.38867000 | -5.30741000 |
| H | -3.70808200 | -5.89713300 | -2.98404300 |
| H | -4.46465000 | -5.66322200 | -0.67914500 |
| H | -2.97216700 | -4.87486700 | -5.11448300 |
| C | 0.95489500  | 3.67187800  | 1.21542000  |
| C | 1.86298500  | 3.11280700  | 2.14942300  |
| C | 1.42937400  | 4.21366100  | -0.00548700 |
| C | 1.45774300  | 2.58143700  | 3.41760700  |
| C | 3.27326800  | 3.07632900  | 1.83536200  |
| C | 2.83448900  | 4.11487600  | -0.32865200 |
| C | 2.37468900  | 2.10870000  | 4.32010300  |
| H | 0.40283000  | 2.56294900  | 3.66612100  |
| C | 4.19478600  | 2.56418800  | 2.80113100  |

|   |              |              |              |
|---|--------------|--------------|--------------|
| C | 3. 71548100  | 3. 54918500  | 0. 59703800  |
| C | 3. 76504600  | 2. 10597000  | 4. 01598700  |
| H | 2. 03830200  | 1. 71761100  | 5. 27638600  |
| H | 5. 25111700  | 2. 54965300  | 2. 54448000  |
| H | 4. 77105200  | 3. 47851600  | 0. 34900500  |
| H | 4. 47459700  | 1. 72083500  | 4. 74219000  |
| C | -5. 88296100 | -2. 22493800 | 2. 41070200  |
| H | -6. 29914200 | -1. 62847000 | 3. 21838500  |
| C | -5. 43966400 | -1. 60809400 | 1. 26910900  |
| H | -5. 51332200 | -0. 53009700 | 1. 18285100  |
| C | -5. 81204500 | -3. 64026100 | 2. 54999200  |
| H | -6. 16166700 | -4. 11103200 | 3. 46475600  |
| C | -5. 32145500 | -4. 39926100 | 1. 52232600  |
| H | -5. 27948100 | -5. 48290900 | 1. 60361000  |
| C | 1. 07662600  | 5. 38061800  | -2. 12384400 |
| H | 0. 41058300  | 5. 89029000  | -2. 81506600 |
| C | 2. 45224000  | 5. 23117400  | -2. 45954900 |
| H | 2. 81984100  | 5. 61203600  | -3. 40840900 |
| C | 3. 30453900  | 4. 61722800  | -1. 58279000 |
| H | 4. 35692200  | 4. 49212500  | -1. 82163000 |
| C | 0. 58399400  | 4. 88863700  | -0. 94359700 |
| H | -0. 46602400 | 5. 01911500  | -0. 70746000 |
| C | -1. 25315400 | -1. 91438300 | 3. 76824500  |
| C | -1. 27830900 | -3. 03659600 | 2. 68478000  |
| H | -1. 63985200 | -3. 99064600 | 3. 08161300  |
| H | -1. 95892000 | -2. 75712800 | 1. 87722400  |
| C | 0. 23787600  | -3. 74464900 | 0. 71312500  |
| C | -0. 58399600 | -3. 22984000 | -0. 30047000 |
| C | 1. 12090100  | -4. 78110500 | 0. 36678000  |
| C | -0. 51633600 | -3. 71326900 | -1. 60611700 |
| H | -1. 29231400 | -2. 43617200 | -0. 08541400 |
| C | 1. 18244000  | -5. 27755000 | -0. 93580900 |
| H | 1. 77284700  | -5. 22207600 | 1. 11049300  |
| C | 0. 36693300  | -4. 74217200 | -1. 92968600 |
| H | -1. 14296400 | -3. 27386100 | -2. 37305800 |
| H | 1. 87702700  | -6. 08066200 | -1. 16800400 |
| H | 0. 41845000  | -5. 11611200 | -2. 94827100 |
| C | 0. 16429000  | -3. 19719900 | 2. 14318200  |
| C | 0. 11802900  | -1. 22043900 | 3. 54035800  |
| H | 0. 83737400  | -1. 47325100 | 4. 32147700  |
| H | 0. 04857500  | -0. 13105900 | 3. 49774100  |
| N | 0. 62915000  | -1. 70555800 | 2. 21489200  |
| C | 2. 06991300  | -1. 51371300 | 2. 02317700  |
| N | 2. 38250800  | -1. 40431500 | 0. 71360600  |

|   |             |             |             |
|---|-------------|-------------|-------------|
| C | 3.68779200  | -1.23484900 | 0.16844900  |
| C | 4.71880700  | -2.13461700 | 0.44871600  |
| C | 3.90503100  | -0.17311100 | -0.71281100 |
| C | 5.96612100  | -1.96068000 | -0.14884500 |
| C | 5.15652400  | -0.01601200 | -1.31035800 |
| H | 3.10033400  | 0.51377400  | -0.93768100 |
| C | 6.19444200  | -0.90341800 | -1.03091300 |
| H | 7.16545900  | -0.77815300 | -1.49571500 |
| C | 5.40724700  | 1.15268400  | -2.22688000 |
| C | 7.05738700  | -2.96919800 | 0.09775300  |
| F | 4.27754900  | 1.59200300  | -2.81437100 |
| F | 6.28732600  | 0.84246800  | -3.20301100 |
| F | 5.93880400  | 2.21177200  | -1.55517600 |
| F | 8.28322200  | -2.40345700 | 0.03593400  |
| F | 7.03631000  | -3.95989500 | -0.82470500 |
| F | 6.93816700  | -3.55603000 | 1.30745700  |
| S | 3.17308400  | -1.44002800 | 3.26770900  |
| H | 4.54973200  | -2.96042300 | 1.12665500  |
| H | 1.63237700  | -1.31735000 | 0.02476300  |
| H | -0.10020100 | -0.67965200 | 1.30343500  |
| C | 0.98145100  | -4.06682800 | 3.11759300  |
| H | 0.94511500  | -3.67947300 | 4.13474900  |
| H | 2.03532300  | -4.13268300 | 2.84491300  |
| H | 0.56031200  | -5.07709300 | 3.12516200  |
| N | -1.25980400 | 0.21473900  | -1.66765100 |
| S | 0.00071700  | -0.18732400 | -2.56411700 |
| O | -0.45342400 | -0.83665300 | -3.79012600 |
| O | 1.08628800  | -0.81353100 | -1.78255900 |
| C | 0.74621200  | 1.43957300  | -3.10761900 |
| F | -0.18894400 | 2.25611200  | -3.59437400 |
| F | 1.66803300  | 1.21258200  | -4.04390000 |
| F | 1.33056000  | 2.02085100  | -2.05017400 |
| C | -2.42051300 | -0.93099200 | 3.57143100  |
| H | -3.38069500 | -1.44968500 | 3.66338400  |
| H | -2.38950100 | -0.14047700 | 4.33204700  |
| H | -2.39615700 | -0.45487300 | 2.58924000  |
| C | -1.35052100 | -2.47266300 | 5.20245500  |
| H | -1.24946500 | -1.66543100 | 5.93838400  |
| H | -2.32725200 | -2.94451200 | 5.36216600  |
| H | -0.58076900 | -3.21853200 | 5.42196700  |

TS-1-1-IS

l imaginary frequencies

H = -5198.724532

G = -5198.915476

E(M06-2X-DCM) = -5199.558744

|   |             |             |             |
|---|-------------|-------------|-------------|
| C | 0.64177300  | -2.25497400 | -4.28725900 |
| C | 0.44492600  | -0.83025800 | -4.93565800 |
| H | 1.40984400  | -0.56310600 | -5.37768800 |
| H | -0.25534900 | -0.95640600 | -5.76689800 |
| C | -1.43218500 | 0.57514700  | -3.86687400 |
| C | -2.41782400 | 0.06342300  | -4.74195900 |
| C | -1.86349100 | 1.35880100  | -2.77039600 |
| C | -3.76635500 | 0.32880700  | -4.53539200 |
| H | -2.13566600 | -0.52421500 | -5.60705100 |
| C | -3.21393300 | 1.59329200  | -2.54933200 |
| H | -1.13936000 | 1.74819900  | -2.06358400 |
| C | -4.16961800 | 1.08621900  | -3.43516400 |
| H | -4.50323500 | -0.07091200 | -5.22491600 |
| H | -3.52339500 | 2.17163300  | -1.68561900 |
| H | -5.22528400 | 1.27507900  | -3.26228700 |
| C | -0.00717500 | 0.33306000  | -4.08620000 |
| C | -0.65287300 | -2.85062100 | -3.68607100 |
| H | -0.47715500 | -3.91888500 | -3.49191600 |
| H | -1.46999600 | -2.80101100 | -4.41153300 |
| N | -1.09400900 | -2.19878500 | -2.46643800 |
| C | -2.33681700 | -2.35039000 | -1.92833800 |
| N | -2.43883500 | -1.68008800 | -0.72886500 |
| C | -3.46684600 | -1.50979000 | 0.20180000  |
| C | -4.74547700 | -2.08408100 | 0.14142500  |
| C | -3.14825600 | -0.67925100 | 1.29657100  |
| C | -5.66758400 | -1.81976800 | 1.15782200  |
| C | -4.08101700 | -0.43356100 | 2.29573100  |
| H | -2.16671400 | -0.21928200 | 1.35065600  |
| C | -5.35727000 | -1.00012900 | 2.24002700  |
| H | -6.08701800 | -0.80577800 | 3.01654600  |
| C | -3.70056400 | 0.41503400  | 3.47780300  |
| C | -7.05848200 | -2.38798400 | 1.03443400  |
| F | -3.32055200 | -0.33089900 | 4.54362200  |
| F | -4.72709300 | 1.19175100  | 3.89291200  |
| F | -2.66360900 | 1.24476200  | 3.19870800  |
| F | -7.66485600 | -2.50101200 | 2.23827500  |
| F | -7.05715700 | -3.61059100 | 0.46459300  |
| F | -7.84970100 | -1.59790900 | 0.27011600  |
| S | -3.55141800 | -3.24668500 | -2.68184700 |
| C | 1.04541000  | -3.18714000 | -5.45126500 |
| H | 1.93913300  | -2.81200400 | -5.96225100 |
| H | 1.27209200  | -4.19079400 | -5.07594600 |

|   |             |             |             |
|---|-------------|-------------|-------------|
| H | 0.24282700  | -3.27873900 | -6.19312600 |
| C | 1.79074900  | -2.22813200 | -3.26466700 |
| H | 1.95985000  | -3.22990600 | -2.85559900 |
| H | 2.72247900  | -1.89929000 | -3.73896100 |
| H | 1.60626900  | -1.55784100 | -2.42252000 |
| H | -5.00625400 | -2.72592500 | -0.68834400 |
| C | 0.96901700  | 1.20593600  | -3.56568500 |
| H | -1.58353400 | -1.19203900 | -0.45647900 |
| H | 1.94548400  | 1.17142300  | -4.04969700 |
| H | 0.64678500  | 2.22014800  | -3.32970600 |
| H | -0.37702500 | -1.81678400 | -1.85418000 |
| H | 1.40710900  | 0.88486800  | -2.37869900 |
| O | 0.37937100  | 1.50717000  | 0.92234700  |
| O | 2.29798200  | -0.25571400 | 1.20751000  |
| P | 1.20032400  | 0.32136600  | 0.15786500  |
| O | 0.16954500  | -0.65748100 | -0.29647600 |
| C | 2.44279900  | 4.73073200  | 2.63541200  |
| C | 2.43869100  | 3.48669800  | 3.25567700  |
| C | 1.66652000  | 2.43372700  | 2.74296600  |
| C | 0.90726600  | 3.87931900  | 0.92931400  |
| C | 1.64190700  | 4.92642300  | 1.51290300  |
| C | 1.82439300  | -0.92695200 | 2.35459700  |
| C | 1.39797300  | -0.16661900 | 3.44012500  |
| C | 0.75311600  | -0.80707200 | 4.51004400  |
| C | 0.63936400  | -2.19253900 | 4.54147800  |
| C | 1.18982700  | -2.94039700 | 3.50192000  |
| C | 1.78294000  | -2.33415900 | 2.38090200  |
| H | 1.58264100  | 5.90967900  | 1.05614200  |
| H | 1.15017600  | -4.02507600 | 3.53521100  |
| C | 1.60680600  | 1.30564800  | 3.76813200  |
| C | 2.97172400  | 1.52242400  | 4.50278400  |
| H | 2.97807000  | 1.08028200  | 5.50403900  |
| H | 3.76601400  | 1.04454800  | 3.91810600  |
| H | -0.79306700 | 0.01813200  | 5.79572700  |
| H | 0.84201200  | 0.17389200  | 6.44142100  |
| C | 1.00197300  | 2.60953100  | 1.53032400  |
| H | 3.03632000  | 5.54991200  | 3.03285500  |
| H | 0.14337500  | -2.69118300 | 5.37013200  |
| C | 3.17477400  | 3.05284000  | 4.50431700  |
| H | 2.74185800  | 3.51575900  | 5.40200100  |
| H | 4.23298000  | 3.33675200  | 4.48308400  |
| C | 0.25013500  | 0.20358500  | 5.51621600  |
| C | 0.42185600  | 1.54240700  | 4.76658600  |
| H | 0.60476600  | 2.39240200  | 5.43073700  |

|   |             |             |             |
|---|-------------|-------------|-------------|
| H | -0.48648200 | 1.75384200  | 4.19487400  |
| C | 2.39268700  | -3.21233800 | 1.33243400  |
| C | 3.80397200  | -3.31975100 | 1.25486100  |
| C | 1.57063600  | -4.03265800 | 0.52287600  |
| C | 4.68812000  | -2.60174800 | 2.12236600  |
| C | 4.39891700  | -4.22560900 | 0.29830500  |
| C | 2.18057900  | -4.96003000 | -0.40482100 |
| C | 6.04838000  | -2.73939700 | 2.02995600  |
| H | 4.26617100  | -1.93954300 | 2.86985600  |
| C | 5.82329400  | -4.32460700 | 0.22024700  |
| C | 3.57314900  | -5.01563600 | -0.50588400 |
| C | 6.62909200  | -3.60303000 | 1.05877800  |
| H | 6.69392100  | -2.18217800 | 2.70340800  |
| H | 6.25170000  | -5.00111100 | -0.51560600 |
| H | 4.02683700  | -5.71018400 | -1.21034300 |
| H | 7.71005700  | -3.69246000 | 0.99476100  |
| C | 0.00249900  | 4.21782300  | -0.21698100 |
| C | -1.40265200 | 4.24078100  | -0.01288000 |
| C | 0.54796400  | 4.67882800  | -1.44163100 |
| C | -2.02547700 | 3.79713100  | 1.19863800  |
| C | -2.26577300 | 4.76038600  | -1.05122400 |
| C | -0.33123700 | 5.17495100  | -2.47835500 |
| C | -3.38484300 | 3.84839100  | 1.36918400  |
| H | -1.40501700 | 3.41055300  | 1.99762100  |
| C | -3.67822800 | 4.81237500  | -0.82791400 |
| C | -1.70928800 | 5.20938400  | -2.25177400 |
| C | -4.22689300 | 4.36733700  | 0.34490400  |
| H | -3.82477400 | 3.48401300  | 2.29239100  |
| H | -4.30749400 | 5.21571100  | -1.61805400 |
| H | -2.36534500 | 5.59940900  | -3.02743900 |
| H | -5.30130800 | 4.41088400  | 0.50137900  |
| C | -0.62697100 | -4.84458600 | -0.17777600 |
| H | -1.71003700 | -4.80216700 | -0.11301000 |
| C | 0.13958500  | -4.00370700 | 0.58677200  |
| H | -0.33827200 | -3.29615600 | 1.25404200  |
| C | -0.01986600 | -5.76706200 | -1.07795600 |
| H | -0.64688800 | -6.42577200 | -1.67223800 |
| C | 1.34386500  | -5.81414100 | -1.19116700 |
| H | 1.82124500  | -6.51286100 | -1.87467800 |
| C | 2.45192100  | 5.10876800  | -2.91264200 |
| H | 3.52114300  | 5.06347900  | -3.09577900 |
| C | 1.58231800  | 5.60175800  | -3.92635500 |
| H | 1.99647600  | 5.94899200  | -4.86910700 |
| C | 0.23053400  | 5.63175500  | -3.71213100 |



|   |             |             |             |
|---|-------------|-------------|-------------|
| H | -0.44611800 | 6.00466800  | -4.47757400 |
| C | 1.95468000  | 4.66971600  | -1.71274600 |
| H | 2.63336700  | 4.29030800  | -0.95854100 |
| N | 2.09228600  | 0.87784000  | -1.10677000 |
| S | 3.61793600  | 1.46694800  | -1.15892600 |
| C | 4.74837400  | -0.03064100 | -0.93283100 |
| O | 3.93643000  | 2.34929000  | -0.03483800 |
| O | 3.85311400  | 1.89900600  | -2.53872500 |
| F | 5.07775500  | -0.16481500 | 0.34728400  |
| F | 4.15077000  | -1.14783100 | -1.36316600 |
| F | 5.85466100  | 0.17536100  | -1.65135100 |

TS-1-1-1S-1

1 imaginary frequencies

H = -5198.720781

G = -5198.912014

E(M06-2X-DCM) = -5199.557055

|   |             |             |             |
|---|-------------|-------------|-------------|
| C | 0.23760200  | -2.24838700 | -4.33471100 |
| C | 0.25692100  | -0.77211300 | -4.89318900 |
| H | 1.24758900  | -0.63295800 | -5.33661800 |
| H | -0.46072200 | -0.73819400 | -5.71965500 |
| C | -1.37817200 | 0.82545600  | -3.69837500 |
| C | -2.45252600 | 0.49442500  | -4.55466300 |
| C | -1.66060400 | 1.60853600  | -2.55516500 |
| C | -3.74381600 | 0.93334900  | -4.28533800 |
| H | -2.28253500 | -0.08760000 | -5.45237600 |
| C | -2.95685400 | 2.01859900  | -2.27317900 |
| H | -0.86698900 | 1.86130400  | -1.86151500 |
| C | -4.00212600 | 1.68953100  | -3.14146100 |
| H | -4.55130700 | 0.66910000  | -4.96081900 |
| H | -3.15305200 | 2.59477100  | -1.37551900 |
| H | -5.01505800 | 2.01425000  | -2.92129100 |
| C | -0.00507100 | 0.40782300  | -3.98609800 |
| C | -1.12654600 | -2.68887100 | -3.75238100 |
| H | -1.10474500 | -3.78145400 | -3.62727000 |
| H | -1.93415400 | -2.47728300 | -4.45926400 |
| N | -1.45754900 | -2.06019000 | -2.48696400 |
| C | -2.70204600 | -2.04897100 | -1.93776400 |
| N | -2.69160800 | -1.42404500 | -0.70771400 |
| C | -3.68693800 | -1.08189100 | 0.21000100  |
| C | -5.03127400 | -1.48259000 | 0.16185500  |
| C | -3.26204100 | -0.26618900 | 1.27899100  |
| C | -5.91161000 | -1.06162500 | 1.16145700  |
| C | -4.15591800 | 0.13674300  | 2.26366900  |

|   |             |             |             |
|---|-------------|-------------|-------------|
| H | -2.22774000 | 0.06054500  | 1.32353600  |
| C | -5.49625700 | -0.25411000 | 2.21799600  |
| H | -6.19479200 | 0.06286300  | 2.98252000  |
| C | -3.66200000 | 0.96138900  | 3.42016800  |
| C | -7.36613700 | -1.44195200 | 1.05025800  |
| F | -3.28684800 | 0.19255400  | 4.47247100  |
| F | -4.60543500 | 1.81336900  | 3.87663100  |
| F | -2.57830000 | 1.71039200  | 3.08714900  |
| F | -7.97751300 | -1.44982900 | 2.25708900  |
| F | -7.53011100 | -2.66441400 | 0.50465400  |
| F | -8.04806200 | -0.56787700 | 0.27222500  |
| S | -4.04486400 | -2.71803200 | -2.70946000 |
| C | 0.49346000  | -3.15392600 | -5.56037600 |
| H | 1.43141000  | -2.88394400 | -6.05813200 |
| H | 0.56998000  | -4.20191200 | -5.25151100 |
| H | -0.31650100 | -3.07822200 | -6.29618900 |
| C | 1.38230900  | -2.45685700 | -3.32875500 |
| H | 1.40154300  | -3.49452200 | -2.97906200 |
| H | 2.35223000  | -2.24343200 | -3.79103700 |
| H | 1.30248800  | -1.82025700 | -2.44522000 |
| H | -5.37388100 | -2.11135900 | -0.64789500 |
| C | 1.08976600  | 1.14046000  | -3.49160000 |
| H | -1.77193700 | -1.07639800 | -0.43233800 |
| H | 2.04037300  | 0.98372700  | -4.00159600 |
| H | 0.90453000  | 2.18108100  | -3.22771500 |
| H | -0.68598700 | -1.79418100 | -1.88041600 |
| H | 1.53185100  | 0.76042900  | -2.30331700 |
| O | 0.58048600  | 1.36072500  | 0.85100100  |
| O | 2.20553200  | -0.66059000 | 1.19589300  |
| P | 1.22232500  | 0.04524700  | 0.12257300  |
| O | 0.05824500  | -0.76964300 | -0.33177400 |
| C | 3.13438100  | 4.18966000  | 2.60455200  |
| C | 2.89155100  | 2.97510100  | 3.23511400  |
| C | 1.96349500  | 2.06206700  | 2.70740500  |
| C | 1.52348100  | 3.59753000  | 0.86017500  |
| C | 2.41616900  | 4.50637700  | 1.45378400  |
| C | 1.61570000  | -1.27189200 | 2.31999400  |
| C | 1.28240100  | -0.46318600 | 3.39987300  |
| C | 0.53511300  | -1.00638000 | 4.45492400  |
| C | 0.22735900  | -2.36330900 | 4.47160600  |
| C | 0.68173400  | -3.17709800 | 3.43346500  |
| C | 1.37303900  | -2.65666200 | 2.32473900  |
| H | 2.54465300  | 5.47769500  | 0.98570600  |
| H | 0.48569100  | -4.24479000 | 3.45888300  |

|   |              |              |              |
|---|--------------|--------------|--------------|
| C | 1. 70246000  | 0. 96005600  | 3. 73389900  |
| C | 3. 07150600  | 0. 96018400  | 4. 49315400  |
| H | 2. 99452900  | 0. 51508600  | 5. 48982700  |
| H | 3. 79134600  | 0. 37034200  | 3. 91360600  |
| H | -0. 89126000 | 0. 03998900  | 5. 72193100  |
| H | 0. 73990200  | -0. 04677500 | 6. 38920000  |
| C | 1. 37195100  | 2. 33796900  | 1. 47321500  |
| H | 3. 85029900  | 4. 89709500  | 3. 01496900  |
| H | -0. 34646300 | -2. 79296400 | 5. 28862100  |
| C | 3. 50843700  | 2. 43905900  | 4. 50807200  |
| H | 3. 11777600  | 2. 96568900  | 5. 38979900  |
| H | 4. 59767100  | 2. 55862400  | 4. 52770000  |
| C | 0. 17097000  | 0. 06785400  | 5. 45621600  |
| C | 0. 54751000  | 1. 36881400  | 4. 71107400  |
| H | 0. 83876300  | 2. 18382500  | 5. 38061000  |
| H | -0. 31119900 | 1. 70856200  | 4. 12387000  |
| C | 1. 86298600  | -3. 58295000 | 1. 25745900  |
| C | 3. 25588900  | -3. 80214700 | 1. 11100900  |
| C | 0. 93853100  | -4. 30828400 | 0. 46641400  |
| C | 4. 23945100  | -3. 14677600 | 1. 91861600  |
| C | 3. 72748800  | -4. 75305100 | 0. 13071000  |
| C | 1. 42623500  | -5. 27615200 | -0. 49120600 |
| C | 5. 57801700  | -3. 38475500 | 1. 74969300  |
| H | 3. 91356000  | -2. 45360200 | 2. 68546700  |
| C | 5. 13296000  | -4. 96721600 | -0. 01914800 |
| C | 2. 80294400  | -5. 46448200 | -0. 63776800 |
| C | 6. 03684400  | -4. 30137200 | 0. 76242100  |
| H | 6. 30042600  | -2. 87020200 | 2. 37774800  |
| H | 5. 46640300  | -5. 67897400 | -0. 77062700 |
| H | 3. 16457600  | -6. 19006900 | -1. 36384700 |
| H | 7. 10272300  | -4. 47253500 | 0. 63920600  |
| C | 0. 71657600  | 4. 08713100  | -0. 30494700 |
| C | -0. 65432500 | 4. 40265600  | -0. 11042900 |
| C | 1. 35107500  | 4. 40884700  | -1. 53028500 |
| C | -1. 36330800 | 4. 09982400  | 1. 09709000  |
| C | -1. 38467200 | 5. 08452800  | -1. 15648800 |
| C | 0. 60124700  | 5. 07422500  | -2. 57386800 |
| C | -2. 68353000 | 4. 43336700  | 1. 25803000  |
| H | -0. 84332800 | 3. 59207600  | 1. 90010100  |
| C | -2. 75592300 | 5. 43138100  | -0. 94235100 |
| C | -0. 73916400 | 5. 40141700  | -2. 35474000 |
| C | -3. 39195700 | 5. 11586400  | 0. 22833800  |
| H | -3. 19457200 | 4. 16807700  | 2. 17856800  |
| H | -3. 28343200 | 5. 95163700  | -1. 73839100 |

|   |             |             |             |
|---|-------------|-------------|-------------|
| H | -1.29411700 | 5.91743900  | -3.13560600 |
| H | -4.43447700 | 5.38329700  | 0.37767600  |
| C | -1.34732700 | -4.86263300 | -0.20696500 |
| H | -2.41756800 | -4.69842100 | -0.12336400 |
| C | -0.47995500 | -4.12769500 | 0.55945600  |
| H | -0.86854300 | -3.38374900 | 1.24497400  |
| C | -0.86093500 | -5.83012400 | -1.13236300 |
| H | -1.56560300 | -6.40463200 | -1.72704900 |
| C | 0.48743700  | -6.02370500 | -1.27055500 |
| H | 0.87428900  | -6.75583200 | -1.97601800 |
| C | 3.30546300  | 4.40436800  | -2.99895000 |
| H | 4.33978400  | 4.12745700  | -3.18045300 |
| C | 2.56558900  | 5.07023000  | -4.01750600 |
| H | 3.04719500  | 5.31421200  | -4.96046200 |
| C | 1.25190600  | 5.39231100  | -3.80794400 |
| H | 0.67337100  | 5.89697100  | -4.57817900 |
| C | 2.72199900  | 4.09070200  | -1.79891200 |
| H | 3.29481200  | 3.56851800  | -1.04460400 |
| N | 2.23656400  | 0.56413800  | -1.07312400 |
| S | 3.76692800  | 0.04128000  | -1.39976500 |
| C | 4.86907400  | 0.79354000  | -0.05725200 |
| O | 4.16859100  | 0.72346000  | -2.63290400 |
| O | 3.94405100  | -1.40327200 | -1.26660600 |
| F | 4.43457900  | 2.00931500  | 0.30158000  |
| F | 4.91623300  | 0.01890000  | 1.02455300  |
| F | 6.09626300  | 0.90537100  | -0.56850700 |

TS-1-1-1R

1 imaginary frequencies

H = -5198.716238

G = -5198.905118

E(M06-2X-DCM) = -5199.552514

|   |             |             |            |
|---|-------------|-------------|------------|
| C | 1.06418900  | 3.31537800  | 3.74253600 |
| C | -0.13017200 | 2.64295500  | 4.52714100 |
| H | -0.96120900 | 3.35375500  | 4.49126200 |
| H | 0.17796400  | 2.57098200  | 5.57411900 |
| C | 0.03878300  | 0.08272000  | 4.55365400 |
| C | 0.78162900  | 0.07218800  | 5.75697500 |
| C | -0.06427400 | -1.12550100 | 3.82585500 |
| C | 1.38316800  | -1.09408300 | 6.21702400 |
| H | 0.86229900  | 0.96588700  | 6.36422200 |
| C | 0.56887500  | -2.27736100 | 4.27336900 |
| H | -0.57893900 | -1.14139300 | 2.87146000 |
| C | 1.28652600  | -2.27001300 | 5.47300600 |

|   |              |              |              |
|---|--------------|--------------|--------------|
| H | 1. 93575300  | -1. 08041100 | 7. 15171000  |
| H | 0. 50227700  | -3. 18155500 | 3. 67955100  |
| H | 1. 77442500  | -3. 17596900 | 5. 82151300  |
| C | -0. 62996000 | 1. 29450800  | 4. 07876500  |
| C | 2. 26981800  | 2. 37876700  | 3. 50687100  |
| H | 3. 13179200  | 2. 99476400  | 3. 21331500  |
| H | 2. 55804900  | 1. 87730200  | 4. 43519800  |
| N | 2. 03768000  | 1. 35131100  | 2. 49986500  |
| C | 2. 93911800  | 0. 34916100  | 2. 24375300  |
| N | 2. 49698800  | -0. 48173500 | 1. 23995400  |
| C | 3. 15706100  | -1. 42715300 | 0. 44221200  |
| C | 4. 52682600  | -1. 72774900 | 0. 49366400  |
| C | 2. 35729200  | -2. 08047900 | -0. 51403100 |
| C | 5. 06562400  | -2. 64641500 | -0. 40904300 |
| C | 2. 91703500  | -2. 99101700 | -1. 40310300 |
| H | 1. 29812000  | -1. 85426200 | -0. 56096100 |
| C | 4. 27998800  | -3. 28876000 | -1. 36440200 |
| H | 4. 71417100  | -4. 00316100 | -2. 05283400 |
| C | 2. 04896200  | -3. 57962600 | -2. 47941000 |
| C | 6. 55332600  | -2. 87826300 | -0. 40656400 |
| F | 0. 78451800  | -3. 80994100 | -2. 05316000 |
| F | 1. 94269800  | -2. 74357400 | -3. 54992100 |
| F | 2. 53495800  | -4. 74736600 | -2. 95024500 |
| F | 6. 87444100  | -4. 10949600 | -0. 86409600 |
| F | 7. 19250300  | -1. 98837400 | -1. 21250700 |
| F | 7. 09249100  | -2. 74684600 | 0. 82143400  |
| S | 4. 36103900  | 0. 18725600  | 3. 12692300  |
| C | 1. 56929500  | 4. 46213000  | 4. 64520200  |
| H | 0. 74503900  | 5. 12728600  | 4. 92621200  |
| H | 2. 31830500  | 5. 06375700  | 4. 11932500  |
| H | 2. 02769700  | 4. 08000400  | 5. 56565400  |
| C | 0. 55700900  | 3. 92523400  | 2. 42644700  |
| H | 1. 37831500  | 4. 41223900  | 1. 89239200  |
| H | -0. 21172500 | 4. 68005900  | 2. 61875900  |
| H | 0. 09957000  | 3. 19594800  | 1. 75373500  |
| H | 5. 15648800  | -1. 25106500 | 1. 23067500  |
| C | -1. 76578300 | 1. 23553300  | 3. 24963600  |
| H | 1. 50150500  | -0. 40257800 | 1. 01028700  |
| H | -2. 41520900 | 2. 11134600  | 3. 30045900  |
| H | -2. 30082000 | 0. 28779400  | 3. 20736500  |
| H | 1. 41700200  | 1. 60061800  | 1. 73920700  |
| H | -1. 50361900 | 1. 40763500  | 1. 97017900  |
| O | -2. 49943900 | -0. 29672700 | -0. 93536000 |
| O | -0. 15327300 | 0. 65771500  | -1. 56744400 |

|   |             |             |             |
|---|-------------|-------------|-------------|
| P | -1.12327900 | 0.30060600  | -0.31429100 |
| O | -0.35043500 | -0.62151900 | 0.56838400  |
| C | -2.32299000 | -3.89761000 | -3.08821500 |
| C | -1.99361000 | -2.69174200 | -3.69397900 |
| C | -2.13223500 | -1.47728200 | -3.00142500 |
| C | -2.84125500 | -2.70776700 | -1.01301100 |
| C | -2.77397700 | -3.89000000 | -1.77102900 |
| C | -0.46304600 | 1.48877800  | -2.65570300 |
| C | -1.39009900 | 1.06872000  | -3.60705600 |
| C | -1.83931900 | 1.99151000  | -4.56538700 |
| C | -1.25685900 | 3.24905400  | -4.66820100 |
| C | -0.19723400 | 3.57154900  | -3.82371000 |
| C | 0.22184400  | 2.71280700  | -2.79281700 |
| H | -3.05570400 | -4.82210400 | -1.29108500 |
| H | 0.32096100  | 4.51752400  | -3.94517100 |
| C | -1.92927400 | -0.31430800 | -3.96515500 |
| C | -0.97330900 | -0.99399800 | -5.00707300 |
| H | -0.97409000 | -0.47977300 | -5.97239900 |
| H | 0.04868100  | -0.96998700 | -4.61222700 |
| H | -2.60652200 | 1.19876700  | -6.43432500 |
| H | -3.81210700 | 2.06163400  | -5.48573600 |
| C | -2.48618000 | -1.50543600 | -1.65569900 |
| H | -2.22929300 | -4.83574600 | -3.62884600 |
| H | -1.59322500 | 3.95912400  | -5.41928700 |
| C | -1.44871800 | -2.45822800 | -5.08400400 |
| H | -0.63395200 | -3.14912900 | -5.32727100 |
| H | -2.22553000 | -2.59516200 | -5.84902000 |
| C | -2.94584300 | 1.39474900  | -5.40779600 |
| C | -3.27268600 | 0.08429400  | -4.65995400 |
| H | -4.02384000 | 0.27538000  | -3.88481400 |
| H | -3.65621200 | -0.70614300 | -5.31241300 |
| C | 1.42029900  | 3.09744000  | -1.98411800 |
| C | 1.43589200  | 4.32342100  | -1.26992000 |
| C | 2.59851800  | 2.30699800  | -2.06237600 |
| C | 0.27868600  | 5.15873900  | -1.13018100 |
| C | 2.66180100  | 4.77207000  | -0.64632200 |
| C | 3.79636500  | 2.73923200  | -1.37708800 |
| C | 0.34411300  | 6.36460000  | -0.47990600 |
| H | -0.66789400 | 4.81738100  | -1.53186000 |
| C | 2.68775500  | 6.04166900  | 0.01386600  |
| C | 3.79838200  | 3.96137600  | -0.69947900 |
| C | 1.56683800  | 6.82450500  | 0.08620900  |
| H | -0.55165200 | 6.97236900  | -0.38674400 |
| H | 3.62575500  | 6.37082900  | 0.45552300  |

|   |             |             |             |
|---|-------------|-------------|-------------|
| H | 4.71283200  | 4.29525500  | -0.21314600 |
| H | 1.60117900  | 7.78907000  | 0.58579500  |
| C | -3.30634800 | -2.80989100 | 0.40491300  |
| C | -2.55796800 | -3.58465900 | 1.32755000  |
| C | -4.56026000 | -2.26856700 | 0.78379900  |
| C | -1.29138300 | -4.17513300 | 1.00457800  |
| C | -3.08743100 | -3.82475000 | 2.65185300  |
| C | -5.04447700 | -2.46285100 | 2.13229600  |
| C | -0.64711000 | -5.00497200 | 1.88618800  |
| H | -0.83989700 | -3.96627500 | 0.04228400  |
| C | -2.37728600 | -4.68788800 | 3.54450900  |
| C | -4.29762300 | -3.23471400 | 3.02646000  |
| C | -1.20353500 | -5.28284200 | 3.16821500  |
| H | 0.30303300  | -5.45216200 | 1.60633900  |
| H | -2.80312900 | -4.87202700 | 4.52803700  |
| H | -4.68458800 | -3.40824400 | 4.02867100  |
| H | -0.68440600 | -5.95362400 | 3.84774000  |
| C | 3.83275400  | 0.35274300  | -2.86565600 |
| H | 3.85093100  | -0.56754700 | -3.44206500 |
| C | 2.68441000  | 1.09937900  | -2.82729800 |
| H | 1.82234500  | 0.77273000  | -3.39570600 |
| C | 4.99171600  | 0.75684400  | -2.14453900 |
| H | 5.87938300  | 0.13183700  | -2.15583400 |
| C | 4.97039200  | 1.92346600  | -1.42957700 |
| H | 5.84999500  | 2.25536500  | -0.88350300 |
| C | -6.62486200 | -1.06731400 | 0.26631900  |
| H | -7.25007200 | -0.54202900 | -0.45051900 |
| C | -7.07564100 | -1.22264800 | 1.60760900  |
| H | -8.03576800 | -0.80969800 | 1.90470300  |
| C | -6.30537200 | -1.90374400 | 2.51060800  |
| H | -6.64546200 | -2.04839300 | 3.53339000  |
| C | -5.41327000 | -1.57057700 | -0.12930000 |
| H | -5.09036000 | -1.44428500 | -1.15595100 |
| N | -1.62281600 | 1.61579200  | 0.55818700  |
| S | -2.67962100 | 2.81307900  | 0.19195700  |
| C | -4.39212300 | 2.05146900  | 0.37545000  |
| O | -2.61011100 | 3.78149600  | 1.28837700  |
| O | -2.60209500 | 3.24281900  | -1.20438500 |
| F | -5.26069200 | 3.03162000  | 0.63503200  |
| F | -4.39829200 | 1.18211900  | 1.39384300  |
| F | -4.75917300 | 1.43407000  | -0.74612900 |

TS-1-1-1R-1

1 imaginary frequencies

H = -5198.708876

G = -5198.898736

E(M06-2X-DCM) = -5199.543815

|   |             |             |             |
|---|-------------|-------------|-------------|
| C | -0.25683900 | 3.08571700  | 3.88850100  |
| C | -0.98673000 | 1.94756300  | 4.70139000  |
| H | -2.02797700 | 2.26761000  | 4.80702000  |
| H | -0.55985600 | 1.94641400  | 5.70832300  |
| C | 0.15979400  | -0.33654800 | 4.44502400  |
| C | 1.04582500  | -0.07356600 | 5.51721000  |
| C | 0.39275700  | -1.49474900 | 3.66594400  |
| C | 2.10865700  | -0.92449400 | 5.79559300  |
| H | 0.89410600  | 0.78339200  | 6.16176700  |
| C | 1.47203800  | -2.32712300 | 3.93158800  |
| H | -0.23229200 | -1.70255100 | 2.80702600  |
| C | 2.33018900  | -2.04923400 | 4.99947100  |
| H | 2.76863000  | -0.70422800 | 6.62917600  |
| H | 1.64722700  | -3.19262700 | 3.30226700  |
| H | 3.17079900  | -2.70555900 | 5.20670200  |
| C | -0.97763100 | 0.53923400  | 4.16064200  |
| C | 1.22162200  | 2.78759300  | 3.55471100  |
| H | 1.69895000  | 3.72884700  | 3.25451800  |
| H | 1.75582400  | 2.45557300  | 4.45291400  |
| N | 1.42895400  | 1.80837000  | 2.49739400  |
| C | 2.66718200  | 1.43780900  | 2.06554600  |
| N | 2.60224400  | 0.48689000  | 1.07273600  |
| C | 3.57191000  | -0.06209000 | 0.22633200  |
| C | 4.90950600  | 0.35250100  | 0.13544100  |
| C | 3.12353500  | -1.08954400 | -0.62629100 |
| C | 5.75583100  | -0.24638900 | -0.79919000 |
| C | 3.98687600  | -1.67457900 | -1.54605200 |
| H | 2.08970600  | -1.41302700 | -0.56980800 |
| C | 5.31660300  | -1.26048200 | -1.64674900 |
| H | 5.98649400  | -1.71104900 | -2.36894400 |
| C | 3.50125000  | -2.79837800 | -2.41828900 |
| C | 7.15132900  | 0.29385500  | -0.96456900 |
| F | 3.77233900  | -4.01553100 | -1.87625800 |
| F | 2.16203500  | -2.75556500 | -2.61531300 |
| F | 4.08693200  | -2.78358900 | -3.63535700 |
| F | 8.00591800  | -0.64456900 | -1.43056400 |
| F | 7.17908400  | 1.31899200  | -1.85891600 |
| F | 7.65882900  | 0.77072700  | 0.18857400  |
| S | 4.06551600  | 2.09195400  | 2.74587500  |
| C | -0.24523400 | 4.31759300  | 4.82156100  |
| H | -1.25647300 | 4.54786200  | 5.17550900  |



|   |             |             |             |
|---|-------------|-------------|-------------|
| H | 0.13100700  | 5.19760500  | 4.28941000  |
| H | 0.39249600  | 4.15352600  | 5.69870300  |
| C | -1.05991500 | 3.44509100  | 2.62953600  |
| H | -0.57169700 | 4.26215400  | 2.09135300  |
| H | -2.06666300 | 3.77975400  | 2.90068200  |
| H | -1.18099600 | 2.61379400  | 1.93087600  |
| H | 5.27439400  | 1.13439600  | 0.78536800  |
| C | -2.09546100 | 0.10387800  | 3.42733600  |
| H | 1.66336200  | 0.12545900  | 0.88404600  |
| H | -3.02782900 | 0.62851400  | 3.64097900  |
| H | -2.23177100 | -0.96991200 | 3.30821800  |
| H | 0.62601000  | 1.43860900  | 2.00241500  |
| H | -2.11273700 | 0.46053000  | 2.14498300  |
| O | -2.14055900 | -1.43438000 | -0.68486700 |
| O | -0.73436000 | 0.63954300  | -1.41705200 |
| P | -1.30704600 | -0.17477200 | -0.13365700 |
| O | -0.11797800 | -0.47328600 | 0.72098800  |
| C | -0.92149000 | -4.23778700 | -3.53589300 |
| C | -1.30604800 | -2.96096300 | -3.92701100 |
| C | -1.77803400 | -2.02564900 | -2.98934100 |
| C | -1.39188300 | -3.66295200 | -1.20678400 |
| C | -1.00018100 | -4.58706300 | -2.19040100 |
| C | -1.50237700 | 1.33874400  | -2.35693200 |
| C | -2.33943200 | 0.64165800  | -3.22344600 |
| C | -3.29261800 | 1.36220400  | -3.96233700 |
| C | -3.25212800 | 2.75130400  | -3.99913300 |
| C | -2.24597300 | 3.41885800  | -3.29964200 |
| C | -1.36136700 | 2.74253300  | -2.44089700 |
| H | -0.73656900 | -5.59211900 | -1.87643000 |
| H | -2.14671000 | 4.49546000  | -3.39624300 |
| C | -2.33614100 | -0.80453700 | -3.72083300 |
| C | -1.47511800 | -0.86922100 | -5.03454100 |
| H | -1.93353800 | -0.31890400 | -5.86053300 |
| H | -0.49713900 | -0.41543500 | -4.83536000 |
| H | -4.12277300 | 0.45211000  | -5.75441000 |
| H | -5.29189100 | 0.66593100  | -4.45645500 |
| C | -1.74006000 | -2.36755000 | -1.63945500 |
| H | -0.57276500 | -4.96055700 | -4.26881400 |
| H | -3.96717500 | 3.31348700  | -4.59445400 |
| C | -1.29841800 | -2.37179400 | -5.31760100 |
| H | -0.37447200 | -2.59626300 | -5.86228700 |
| H | -2.12669600 | -2.76702300 | -5.92220500 |
| C | -4.24516300 | 0.41566700  | -4.66341300 |
| C | -3.84742500 | -0.96428200 | -4.08634400 |

|   |             |             |             |
|---|-------------|-------------|-------------|
| H | -4.41103200 | -1.15999900 | -3.16855900 |
| H | -4.02454600 | -1.79023900 | -4.78203800 |
| C | -0.26502900 | 3.50075300  | -1.75712700 |
| C | -0.56132400 | 4.61122300  | -0.92165900 |
| C | 1.09034100  | 3.17583000  | -2.04199600 |
| C | -1.89662900 | 5.02054400  | -0.60048800 |
| C | 0.51827600  | 5.38574500  | -0.34834500 |
| C | 2.15458300  | 3.93353400  | -1.42209000 |
| C | -2.14571900 | 6.12085000  | 0.17925400  |
| H | -2.72658300 | 4.44186400  | -0.97908200 |
| C | 0.21602900  | 6.52483200  | 0.46362400  |
| C | 1.84098300  | 5.01324100  | -0.59420600 |
| C | -1.07791500 | 6.89409900  | 0.71494400  |
| H | -3.17257200 | 6.40111600  | 0.39889700  |
| H | 1.04663800  | 7.09651200  | 0.87120800  |
| H | 2.64807000  | 5.58595700  | -0.14249500 |
| H | -1.29411500 | 7.76666200  | 1.32545500  |
| C | -1.45232100 | -4.11413700 | 0.21880200  |
| C | -0.27916800 | -4.61930300 | 0.83851300  |
| C | -2.69153200 | -4.14959400 | 0.90991500  |
| C | 1.01298600  | -4.57439900 | 0.21929800  |
| C | -0.36269300 | -5.20767400 | 2.15697400  |
| C | -2.74482500 | -4.68891900 | 2.25128000  |
| C | 2.11898900  | -5.11337000 | 0.82497900  |
| H | 1.11619100  | -4.10329800 | -0.75006000 |
| C | 0.81122000  | -5.77425200 | 2.74751700  |
| C | -1.58648700 | -5.21374200 | 2.83049800  |
| C | 2.01750200  | -5.73971000 | 2.09997000  |
| H | 3.08040900  | -5.05427100 | 0.32489000  |
| H | 0.72027400  | -6.23343700 | 3.72928700  |
| H | -1.64166000 | -5.64646700 | 3.82751500  |
| H | 2.90050200  | -6.17819300 | 2.55730500  |
| C | 2.79627500  | 1.85448000  | -3.19820700 |
| H | 3.05295000  | 1.06489100  | -3.89924100 |
| C | 1.47835800  | 2.14542000  | -2.95843300 |
| H | 0.71065700  | 1.59322600  | -3.48670700 |
| C | 3.83672500  | 2.56991700  | -2.54150100 |
| H | 4.87439500  | 2.30272600  | -2.71523200 |
| C | 3.51689200  | 3.58575800  | -1.68325000 |
| H | 4.29544100  | 4.15288800  | -1.17955500 |
| C | -5.09655700 | -3.72683700 | 1.04141700  |
| H | -6.00885400 | -3.35927600 | 0.58096200  |
| C | -5.13482200 | -4.22871000 | 2.37276800  |
| H | -6.07465300 | -4.23916400 | 2.91768200  |

|   |             |             |             |
|---|-------------|-------------|-------------|
| C | -3.99073600 | -4.70253000 | 2.95408800  |
| H | -4.00536100 | -5.10495200 | 3.96433900  |
| C | -3.92283200 | -3.69730300 | 0.33478800  |
| H | -3.92633500 | -3.31670800 | -0.67873300 |
| N | -2.46074800 | 0.62121600  | 0.76379800  |
| S | -4.10464100 | 0.55359500  | 0.58273400  |
| C | -4.57670800 | 2.34663300  | 0.34444400  |
| O | -4.55903200 | -0.09996400 | -0.64344700 |
| O | -4.69313000 | 0.20402500  | 1.87751600  |
| F | -5.89611200 | 2.45356100  | 0.51520700  |
| F | -4.26803100 | 2.74455600  | -0.89382800 |
| F | -3.95881600 | 3.13554300  | 1.23018700  |

TS-1-2-2S

l imaginary frequencies

H = -5198.715898

G = -5198.909190

E(M06-2X-DCM) = -5199.556672

|   |             |             |             |
|---|-------------|-------------|-------------|
| O | 2.97645400  | 1.38013200  | 0.18368000  |
| O | 2.90664500  | -1.05883800 | -0.72741500 |
| P | 2.08436300  | 0.02502700  | 0.14916500  |
| O | 2.02033800  | -0.37033800 | 1.62638600  |
| N | 0.70483500  | 0.31176300  | -0.61476700 |
| S | -0.07176100 | -0.59039800 | -1.68393100 |
| C | 0.79653200  | -0.34668600 | -3.33474200 |
| F | -0.00848600 | -0.78410800 | -4.30407900 |
| F | 1.06928300  | 0.94759100  | -3.54525800 |
| F | 1.94176000  | -1.03550600 | -3.37782700 |
| C | -0.77395500 | 1.58949100  | 3.92650000  |
| C | -1.44171700 | 0.17885100  | 4.08331300  |
| H | -1.27368300 | -0.12016900 | 5.12852700  |
| H | -2.51120800 | 0.34695200  | 3.96098800  |
| C | -2.00424500 | -1.73981100 | 2.45210000  |
| C | -3.37563100 | -1.72673800 | 2.78943100  |
| C | -1.59998000 | -2.52676400 | 1.35089200  |
| C | -4.29596200 | -2.47938500 | 2.06399900  |
| H | -3.72922900 | -1.14861900 | 3.63451700  |
| C | -2.52533000 | -3.25024800 | 0.60899900  |
| H | -0.56460900 | -2.53512000 | 1.03306600  |
| C | -3.87591000 | -3.23614300 | 0.96833500  |
| H | -5.34776600 | -2.44948800 | 2.33212500  |
| H | -2.18647600 | -3.80569100 | -0.25965300 |
| H | -4.60110500 | -3.80008900 | 0.38836100  |
| C | -1.00611700 | -0.99705500 | 3.23751800  |

|   |             |             |             |
|---|-------------|-------------|-------------|
| C | -1.00416300 | 2.21042900  | 2.49468300  |
| H | -0.03293100 | 2.45561700  | 2.05749600  |
| H | -1.56092100 | 3.14355200  | 2.59954700  |
| N | -1.68795500 | 1.39366100  | 1.49540200  |
| C | -3.03415700 | 1.42529500  | 1.26388300  |
| N | -3.37893400 | 0.81153200  | 0.08617300  |
| C | -4.62740200 | 0.40844700  | -0.41708700 |
| C | -5.77343500 | 0.20775800  | 0.36278000  |
| C | -4.68552700 | 0.12200000  | -1.79308000 |
| C | -6.93967600 | -0.27889600 | -0.22938800 |
| C | -5.86276200 | -0.34916800 | -2.36627800 |
| H | -3.80216700 | 0.26009100  | -2.40680100 |
| C | -7.00603700 | -0.55736200 | -1.59196800 |
| H | -7.92184600 | -0.92038500 | -2.04121400 |
| C | -5.88594900 | -0.70154700 | -3.82995000 |
| C | -8.11186000 | -0.57101600 | 0.66821900  |
| F | -5.00849800 | 0.03602000  | -4.54426400 |
| F | -7.11086900 | -0.51232000 | -4.37068700 |
| F | -5.56598800 | -2.00137700 | -4.03523000 |
| F | -9.24487200 | -0.81112800 | -0.02460300 |
| F | -8.36263400 | 0.44182500  | 1.52318100  |
| F | -7.87801700 | -1.67217400 | 1.43422700  |
| S | -4.11653900 | 2.15921500  | 2.33337100  |
| H | -5.75313500 | 0.43173300  | 1.41913900  |
| C | 0.31899600  | -1.43510000 | 3.26549100  |
| H | -2.60877400 | 0.58936800  | -0.54893300 |
| H | 0.94116300  | -1.07396600 | 4.08124700  |
| H | 0.51856100  | -2.46627300 | 2.98186200  |
| O | -1.38773800 | 0.04100600  | -1.90959100 |
| H | -1.09048900 | 1.04167600  | 0.74906000  |
| O | -0.01516300 | -2.03635100 | -1.44563600 |
| H | 1.04698300  | -0.82257200 | 2.27249700  |
| C | 6.80862700  | -2.10376800 | 0.37829600  |
| C | 6.56543000  | -0.94675800 | -0.35424600 |
| C | 5.26661700  | -0.63037100 | -0.78186400 |
| C | 4.41892900  | -2.63264500 | 0.33703100  |
| C | 5.74273300  | -2.94694200 | 0.69005800  |
| C | 3.22384800  | 2.07370600  | -1.01466200 |
| C | 4.18297400  | 1.58601700  | -1.90196200 |
| C | 4.28181900  | 2.16354000  | -3.17873900 |
| C | 3.53790100  | 3.29068800  | -3.50730800 |
| C | 2.69620400  | 3.84881300  | -2.54698700 |
| C | 2.50276200  | 3.25239800  | -1.28877000 |
| H | 5.92331700  | -3.86723200 | 1.23735100  |

|   |              |              |              |
|---|--------------|--------------|--------------|
| H | 2. 14804300  | 4. 75845800  | -2. 77197000 |
| C | 5. 30505300  | 0. 56269200  | -1. 72927000 |
| C | 6. 61164200  | 1. 26900100  | -1. 22529100 |
| H | 7. 04877400  | 1. 92713700  | -1. 98183100 |
| H | 6. 36357500  | 1. 88388400  | -0. 35237400 |
| H | 4. 85634500  | 1. 18436000  | -5. 03857600 |
| H | 6. 19194800  | 1. 95247700  | -4. 18801800 |
| C | 4. 20958700  | -1. 44000000 | -0. 37860700 |
| H | 7. 81568400  | -2. 35623300 | 0. 70026000  |
| H | 3. 62088200  | 3. 74512300  | -4. 49123100 |
| C | 7. 54475400  | 0. 11611600  | -0. 79966500 |
| H | 8. 15667900  | -0. 23628100 | -1. 64178200 |
| H | 8. 24117600  | 0. 40631200  | -0. 00489900 |
| C | 5. 25815600  | 1. 39251200  | -4. 04049000 |
| C | 5. 49114000  | 0. 10880400  | -3. 21497900 |
| H | 6. 46631700  | -0. 35485100 | -3. 39267400 |
| H | 4. 71608000  | -0. 62778300 | -3. 45449200 |
| C | 1. 61133400  | 3. 94356000  | -0. 30432800 |
| C | 2. 17276100  | 4. 52184200  | 0. 86395100  |
| C | 0. 24056900  | 4. 14428700  | -0. 60925600 |
| C | 3. 55433900  | 4. 38973100  | 1. 21874400  |
| C | 1. 33777700  | 5. 31774100  | 1. 73678000  |
| C | -0. 57186900 | 4. 96944800  | 0. 25722000  |
| C | 4. 05994400  | 4. 95770400  | 2. 35878500  |
| H | 4. 21395600  | 3. 83166800  | 0. 56478500  |
| C | 1. 90352800  | 5. 88909100  | 2. 92024200  |
| C | -0. 00194000 | 5. 53234300  | 1. 40203100  |
| C | 3. 22443700  | 5. 71149100  | 3. 23085300  |
| H | 5. 11253300  | 4. 83617500  | 2. 60021600  |
| H | 1. 25541700  | 6. 47736000  | 3. 56575500  |
| H | -0. 61885400 | 6. 14975800  | 2. 05203400  |
| H | 3. 64239500  | 6. 15192400  | 4. 13192600  |
| C | 3. 31800800  | -3. 57542000 | 0. 70490900  |
| C | 2. 62689000  | -4. 28701600 | -0. 30731200 |
| C | 3. 03077100  | -3. 81795200 | 2. 07167200  |
| C | 2. 90003800  | -4. 12105200 | -1. 70270100 |
| C | 1. 61541800  | -5. 25088300 | 0. 06389600  |
| C | 2. 03986600  | -4. 80969900 | 2. 42698800  |
| C | 2. 20842800  | -4. 82291800 | -2. 65392800 |
| H | 3. 67301600  | -3. 42575000 | -2. 00836000 |
| C | 0. 91310600  | -5. 95960300 | -0. 96074200 |
| C | 1. 35518000  | -5. 48998000 | 1. 41584000  |
| C | 1. 19474600  | -5. 75080800 | -2. 28297700 |
| H | 2. 43375200  | -4. 67105800 | -3. 70590700 |

|   |             |             |             |
|---|-------------|-------------|-------------|
| H | 0.15168300  | -6.67572100 | -0.66069500 |
| H | 0.60494700  | -6.22944900 | 1.68867000  |
| H | 0.65404500  | -6.29388100 | -3.05306100 |
| C | -1.72434100 | 3.77309100  | -2.01470700 |
| H | -2.18329500 | 3.29581200  | -2.87597100 |
| C | -0.39877300 | 3.55022500  | -1.74516100 |
| H | 0.17358800  | 2.89226600  | -2.38513100 |
| C | -2.51234000 | 4.60601300  | -1.17100500 |
| H | -3.56214600 | 4.76636900  | -1.39866200 |
| C | -1.94905800 | 5.18198600  | -0.06483000 |
| H | -2.54363100 | 5.80256200  | 0.60065200  |
| C | 3.38641700  | -3.38913800 | 4.45386100  |
| H | 3.88908800  | -2.83633200 | 5.24309700  |
| C | 2.43372500  | -4.39058300 | 4.79716300  |
| H | 2.22643700  | -4.60223200 | 5.84258100  |
| C | 1.77601800  | -5.07217400 | 3.80887300  |
| H | 1.03599300  | -5.83004400 | 4.05512400  |
| C | 3.67032000  | -3.10999900 | 3.14169300  |
| H | 4.38308000  | -2.33026100 | 2.90060900  |
| C | 0.73625100  | 1.60328300  | 4.24025000  |
| H | 1.09295900  | 2.64014800  | 4.26050200  |
| H | 0.94123800  | 1.16940200  | 5.22712200  |
| H | 1.33621100  | 1.07782700  | 3.49479600  |
| C | -1.46752200 | 2.49031700  | 4.97542600  |
| H | -1.28897200 | 2.11901900  | 5.99214800  |
| H | -1.06441700 | 3.50832500  | 4.92097600  |
| H | -2.54538300 | 2.54415500  | 4.79994200  |

TS-1-2-2S-1

l imaginary frequencies

H = -5198.710220

G = -5198.903587

E(M06-2X-DCM) = -5199.546336

|   |             |             |             |
|---|-------------|-------------|-------------|
| O | 3.32394200  | -0.59166700 | 0.15354800  |
| O | 2.21005400  | 1.68509000  | 0.77095300  |
| P | 1.96529800  | 0.28724800  | 0.00333200  |
| O | 1.87349200  | 0.45626100  | -1.51341800 |
| N | 0.68005400  | -0.37143300 | 0.70652000  |
| S | -0.15066100 | 0.18379100  | 1.96734300  |
| C | -0.58912600 | -1.39851100 | 2.85393300  |
| F | -1.45776100 | -1.10121500 | 3.82607500  |
| F | -1.16766200 | -2.27121400 | 2.01630800  |
| F | 0.49257600  | -1.96270800 | 3.39875200  |
| C | -0.51195900 | -2.15464000 | -3.61244200 |

|   |             |             |             |
|---|-------------|-------------|-------------|
| C | -1.34905500 | -0.88335400 | -3.99433200 |
| H | -1.16458600 | -0.70927800 | -5.06480000 |
| H | -2.39348100 | -1.17519000 | -3.88531700 |
| C | -2.24464500 | 1.13981400  | -2.67003400 |
| C | -3.57561200 | 0.92458600  | -3.08917800 |
| C | -2.01538600 | 2.08596300  | -1.64660300 |
| C | -4.62687100 | 1.63898600  | -2.52002700 |
| H | -3.79421500 | 0.21931600  | -3.88206200 |
| C | -3.06957500 | 2.77570400  | -1.06049000 |
| H | -1.01045400 | 2.25096000  | -1.27523100 |
| C | -4.37846000 | 2.55998900  | -1.50088800 |
| H | -5.64507900 | 1.45536500  | -2.84987200 |
| H | -2.86559900 | 3.47325500  | -0.25448700 |
| H | -5.20364600 | 3.09732900  | -1.04205800 |
| C | -1.11584500 | 0.44175500  | -3.30464400 |
| C | -0.72624500 | -2.57572700 | -2.10828100 |
| H | 0.24775900  | -2.65227200 | -1.61838600 |
| H | -1.18880600 | -3.56386400 | -2.07500400 |
| N | -1.51972600 | -1.67975800 | -1.27357700 |
| C | -2.85739400 | -1.83191900 | -1.03805100 |
| N | -3.31018400 | -1.01782600 | -0.03229200 |
| C | -4.61413200 | -0.77535000 | 0.43857100  |
| C | -5.76454100 | -0.85681800 | -0.35428900 |
| C | -4.73364900 | -0.34763300 | 1.77170100  |
| C | -7.00322700 | -0.50488700 | 0.18328400  |
| C | -5.97955400 | -0.00782700 | 2.29214600  |
| H | -3.84940300 | -0.28568700 | 2.39673300  |
| C | -7.12979100 | -0.08197700 | 1.50411000  |
| H | -8.09821200 | 0.17809600  | 1.91254000  |
| C | -6.08057000 | 0.50408900  | 3.70454600  |
| C | -8.19572100 | -0.52738400 | -0.73472300 |
| F | -5.11178000 | -0.00069300 | 4.49786100  |
| F | -7.27046900 | 0.19278400  | 4.26593600  |
| F | -5.96704200 | 1.85294500  | 3.75404200  |
| F | -9.35575000 | -0.31299600 | -0.07946400 |
| F | -8.30820300 | -1.70056200 | -1.39106500 |
| F | -8.09498900 | 0.43861500  | -1.68802300 |
| S | -3.81493900 | -2.91546300 | -1.91167200 |
| H | -5.68972400 | -1.18973600 | -1.37918400 |
| C | 0.14077400  | 1.05349500  | -3.33964700 |
| H | -2.60450000 | -0.47594300 | 0.47073700  |
| H | 0.84900700  | 0.67979900  | -4.07620800 |
| H | 0.17893800  | 2.13208800  | -3.19843800 |
| O | -1.47133300 | 0.67602200  | 1.51064400  |

|   |             |             |             |
|---|-------------|-------------|-------------|
| H | -0.97452500 | -1.13861900 | -0.60366900 |
| O | 0.57849500  | 0.97798900  | 2.95740300  |
| H | 0.87385600  | 0.68897500  | -2.25380000 |
| C | 5.74172700  | 3.92626700  | 0.71630700  |
| C | 5.64763900  | 2.78295100  | 1.50182600  |
| C | 4.45930300  | 2.03431500  | 1.55973700  |
| C | 3.44307700  | 3.59004900  | -0.03359000 |
| C | 4.63595800  | 4.33013700  | -0.02882300 |
| C | 3.58685800  | -1.22973200 | 1.37595300  |
| C | 3.96191100  | -0.46960400 | 2.47823400  |
| C | 3.92612100  | -1.06056400 | 3.75101300  |
| C | 3.71097600  | -2.42854800 | 3.88350800  |
| C | 3.54400600  | -3.20627800 | 2.73496800  |
| C | 3.45416400  | -2.62998600 | 1.45646000  |
| H | 4.68603700  | 5.23146200  | -0.63251100 |
| H | 3.44904000  | -4.28454300 | 2.82209400  |
| C | 4.59417800  | 0.91572700  | 2.59279000  |
| C | 6.15726400  | 0.74345900  | 2.59871100  |
| H | 6.51979700  | 0.27371700  | 3.51712300  |
| H | 6.44162400  | 0.09687600  | 1.76020000  |
| H | 3.38037200  | -0.05155000 | 5.59936800  |
| H | 5.11657300  | -0.15004100 | 5.32716700  |
| C | 3.39189500  | 2.42528000  | 0.75293000  |
| H | 6.66366700  | 4.50100200  | 0.68305000  |
| H | 3.69826400  | -2.89762500 | 4.86400200  |
| C | 6.71620800  | 2.15823500  | 2.36727700  |
| H | 6.82662000  | 2.70540000  | 3.31410900  |
| H | 7.70126200  | 2.15465400  | 1.88725800  |
| C | 4.15118600  | -0.01143700 | 4.82165800  |
| C | 4.10712400  | 1.31563300  | 4.02217300  |
| H | 4.71902800  | 2.10692600  | 4.46692400  |
| H | 3.07451500  | 1.67314300  | 3.95531500  |
| C | 3.31924100  | -3.49560800 | 0.24128700  |
| C | 4.38820000  | -3.55106200 | -0.69208700 |
| C | 2.17967200  | -4.31902400 | 0.06033400  |
| C | 5.59748800  | -2.79775400 | -0.54484400 |
| C | 4.29179900  | -4.42777000 | -1.83785700 |
| C | 2.10868900  | -5.20826600 | -1.07870000 |
| C | 6.60968200  | -2.87651000 | -1.46533000 |
| H | 5.71679300  | -2.16075800 | 0.32361400  |
| C | 5.36676000  | -4.47470200 | -2.77998400 |
| C | 3.15959400  | -5.23117900 | -1.99861100 |
| C | 6.49391400  | -3.71902000 | -2.60647100 |
| H | 7.51523800  | -2.29315500 | -1.32141700 |



|   |             |             |             |
|---|-------------|-------------|-------------|
| H | 5.26754500  | -5.13507300 | -3.63831000 |
| H | 3.10084400  | -5.89952400 | -2.85553000 |
| H | 7.30502600  | -3.76562300 | -3.32794500 |
| C | 2.28579000  | 4.09569000  | -0.83730600 |
| C | 1.17902500  | 4.69048100  | -0.18266500 |
| C | 2.35367800  | 4.07717400  | -2.25131400 |
| C | 1.05428300  | 4.74041900  | 1.24326900  |
| C | 0.12856500  | 5.29745400  | -0.96952100 |
| C | 1.30258600  | 4.70023200  | -3.02537300 |
| C | -0.02844700 | 5.32679600  | 1.84411900  |
| H | 1.83093900  | 4.29752400  | 1.85554400  |
| C | -0.98165600 | 5.90501200  | -0.30227500 |
| C | 0.22234300  | 5.29280500  | -2.36453100 |
| C | -1.06276800 | 5.91876300  | 1.06446200  |
| H | -0.10210200 | 5.33928900  | 2.92768300  |
| H | -1.75973900 | 6.36076700  | -0.91012500 |
| H | -0.56441700 | 5.76385700  | -2.95033200 |
| H | -1.91042100 | 6.38394400  | 1.56014000  |
| C | -0.02313700 | -5.11819300 | 0.75973600  |
| H | -0.85971000 | -5.07263200 | 1.45090400  |
| C | 1.06350600  | -4.30618000 | 0.95659200  |
| H | 1.08306900  | -3.63001200 | 1.79940600  |
| C | -0.07660300 | -6.00854800 | -0.35008900 |
| H | -0.94547700 | -6.64574400 | -0.48793500 |
| C | 0.96034300  | -6.04565500 | -1.24301400 |
| H | 0.93140700  | -6.71495600 | -2.09978300 |
| C | 3.46541500  | 3.45697400  | -4.33811700 |
| H | 4.28612500  | 2.96771300  | -4.85558600 |
| C | 2.44087400  | 4.09506000  | -5.09479900 |
| H | 2.49555500  | 4.09777800  | -6.18002100 |
| C | 1.39030500  | 4.69420500  | -4.45380600 |
| H | 0.59700200  | 5.17717800  | -5.01955700 |
| C | 3.42364800  | 3.44856900  | -2.96813600 |
| H | 4.20474600  | 2.94800400  | -2.40749800 |
| C | 0.99801600  | -2.00703500 | -3.88849400 |
| H | 1.48985600  | -2.97628400 | -3.74416400 |
| H | 1.18532500  | -1.69724900 | -4.92448500 |
| H | 1.49145900  | -1.30168200 | -3.21690100 |
| C | -1.04191400 | -3.28684800 | -4.52258700 |
| H | -0.87152500 | -3.05567100 | -5.58140700 |
| H | -0.51666200 | -4.22276900 | -4.29958100 |
| H | -2.11080600 | -3.45518400 | -4.36252900 |

TS-1-2-2S-2

l imaginary frequencies

H = -5198.717305

G = -5198.909283

E(M06-2X-DCM) = -5199.553965

|   |             |             |             |
|---|-------------|-------------|-------------|
| O | 3.47865800  | 0.29668900  | -0.05617900 |
| O | 2.07623900  | -1.85943900 | -0.44965600 |
| P | 2.02250600  | -0.37703700 | 0.21547900  |
| O | 1.94386100  | -0.43454100 | 1.73761000  |
| N | 0.76111900  | 0.35973200  | -0.43785200 |
| S | 0.15388500  | 0.35167200  | -1.90927800 |
| C | -0.68554600 | -1.32140600 | -2.13871700 |
| F | -1.66102900 | -1.19140400 | -3.04614400 |
| F | 0.19082700  | -2.22507100 | -2.57716600 |
| F | -1.22088400 | -1.74723400 | -0.98715600 |
| C | -0.25063000 | 3.35421400  | 2.94077400  |
| C | -1.01111400 | 2.26190700  | 3.79484800  |
| H | -0.54778200 | 2.28011500  | 4.78869700  |
| H | -2.03735500 | 2.61833600  | 3.90460500  |
| C | -2.21625000 | 0.17471300  | 2.84492600  |
| C | -3.50127600 | 0.59397000  | 3.25324500  |
| C | -2.12097600 | -0.94227900 | 1.98274600  |
| C | -4.63769500 | -0.09477000 | 2.83790900  |
| H | -3.61944700 | 1.43825700  | 3.92073300  |
| C | -3.26071400 | -1.59993400 | 1.53923400  |
| H | -1.14953800 | -1.26129300 | 1.62416700  |
| C | -4.52400600 | -1.18384700 | 1.97389800  |
| H | -5.61834900 | 0.23755400  | 3.16358700  |
| H | -3.16233700 | -2.42989000 | 0.84675800  |
| H | -5.42052600 | -1.68685400 | 1.62398500  |
| C | -1.00186500 | 0.81338400  | 3.35929200  |
| C | -1.14564000 | 3.91478300  | 1.80456800  |
| H | -0.54112600 | 4.61206000  | 1.20902100  |
| H | -1.97650000 | 4.47665800  | 2.23481200  |
| N | -1.73669900 | 2.92920300  | 0.91286500  |
| C | -3.07731100 | 2.83274300  | 0.65528000  |
| N | -3.33100500 | 1.99203900  | -0.39970800 |
| C | -4.50089000 | 1.36642500  | -0.85472100 |
| C | -5.72936300 | 1.35403700  | -0.18378300 |
| C | -4.37666800 | 0.63914600  | -2.05488900 |
| C | -6.78704700 | 0.59624900  | -0.69195400 |
| C | -5.44765600 | -0.09315900 | -2.55151500 |
| H | -3.43227900 | 0.64066700  | -2.58716500 |
| C | -6.66921300 | -0.12953500 | -1.87308900 |
| H | -7.50189800 | -0.70510900 | -2.25855300 |

|   |             |             |             |
|---|-------------|-------------|-------------|
| C | -5.27825300 | -0.92440400 | -3.79545300 |
| C | -8.03845900 | 0.50172600  | 0.13783000  |
| F | -4.21854300 | -0.53661700 | -4.53393200 |
| F | -6.37318000 | -0.86291900 | -4.58708300 |
| F | -5.09362300 | -2.23282300 | -3.49299200 |
| F | -9.07357700 | -0.02986900 | -0.54494100 |
| F | -8.43212600 | 1.70154900  | 0.61011600  |
| F | -7.83642300 | -0.29320800 | 1.22757100  |
| S | -4.24826700 | 3.67187100  | 1.54060500  |
| H | -5.84982200 | 1.92153800  | 0.72732000  |
| C | 0.15551500  | 0.04288200  | 3.54836000  |
| H | -2.50485400 | 1.70107600  | -0.92515300 |
| H | 0.91665300  | 0.47052900  | 4.20004400  |
| H | 0.00885900  | -1.02768400 | 3.69093300  |
| O | 1.11387000  | 0.41922400  | -3.01511400 |
| H | -1.10538300 | 2.46896400  | 0.26133600  |
| O | -0.97306100 | 1.31236400  | -1.91893300 |
| H | 0.93299800  | -0.09147400 | 2.45804200  |
| C | 5.09119300  | -4.56718800 | 0.62272100  |
| C | 5.32384900  | -3.59333800 | -0.34185800 |
| C | 4.30149100  | -2.71790400 | -0.74257300 |
| C | 2.79059900  | -3.77230500 | 0.86346900  |
| C | 3.82502900  | -4.66257000 | 1.19737600  |
| C | 3.90612500  | 0.59408300  | -1.36310200 |
| C | 4.32294600  | -0.43640700 | -2.20324600 |
| C | 4.51645900  | -0.16264900 | -3.56625500 |
| C | 4.45677300  | 1.14145000  | -4.04260800 |
| C | 4.21242000  | 2.17813300  | -3.14411800 |
| C | 3.91310100  | 1.93549200  | -1.79270900 |
| H | 3.62225600  | -5.43089900 | 1.93754500  |
| H | 4.22183000  | 3.20704000  | -3.49059800 |
| C | 4.76953200  | -1.86920800 | -1.91895500 |
| C | 6.32005400  | -1.89562800 | -1.67393400 |
| H | 6.88879700  | -1.68108400 | -2.58313000 |
| H | 6.57088500  | -1.12533600 | -0.93536600 |
| H | 4.14754500  | -1.51310500 | -5.23185000 |
| H | 5.81716400  | -1.50650000 | -4.67372100 |
| C | 3.06851300  | -2.78495800 | -0.10008000 |
| H | 5.88167300  | -5.24875000 | 0.92624800  |
| H | 4.61652300  | 1.35789000  | -5.09564600 |
| C | 6.60571000  | -3.29017500 | -1.08311600 |
| H | 6.78946400  | -4.03085200 | -1.87408100 |
| H | 7.48465700  | -3.30333400 | -0.42878400 |
| C | 4.77375000  | -1.44085800 | -4.33564300 |

|   |             |             |             |
|---|-------------|-------------|-------------|
| C | 4.44428600  | -2.53534200 | -3.29522700 |
| H | 4.99853000  | -3.46627800 | -3.45154300 |
| H | 3.37382500  | -2.76792000 | -3.32808900 |
| C | 3.69918300  | 3.10692200  | -0.88480300 |
| C | 4.65180500  | 3.39143800  | 0.12797900  |
| C | 2.62481100  | 4.00173400  | -1.11989800 |
| C | 5.78238000  | 2.55394100  | 0.39600700  |
| C | 4.51867600  | 4.59692500  | 0.91549900  |
| C | 2.51824200  | 5.21440900  | -0.33848000 |
| C | 6.68546200  | 2.86096000  | 1.37991200  |
| H | 5.92770800  | 1.66175600  | -0.20151900 |
| C | 5.48036900  | 4.87856400  | 1.93597100  |
| C | 3.46545300  | 5.47807700  | 0.65455100  |
| C | 6.53242400  | 4.03551400  | 2.16934000  |
| H | 7.53248400  | 2.20387600  | 1.55827300  |
| H | 5.35675700  | 5.78725800  | 2.52063200  |
| H | 3.38285800  | 6.39321600  | 1.23804800  |
| H | 7.25733300  | 4.26166100  | 2.94657700  |
| C | 1.45851300  | -3.94353900 | 1.52423000  |
| C | 0.36401800  | -4.45811500 | 0.78646700  |
| C | 1.32933800  | -3.69841100 | 2.91353600  |
| C | 0.44163500  | -4.75892200 | -0.61112600 |
| C | -0.88734800 | -4.72564200 | 1.45974200  |
| C | 0.07832400  | -3.99115400 | 3.57721400  |
| C | -0.63746300 | -5.25206600 | -1.29666200 |
| H | 1.37599000  | -4.58813300 | -1.13300400 |
| C | -1.98968200 | -5.24124100 | 0.70725100  |
| C | -0.99410300 | -4.49140100 | 2.83339700  |
| C | -1.87420900 | -5.49279700 | -0.63347100 |
| H | -0.55092600 | -5.46391300 | -2.35871200 |
| H | -2.92273800 | -5.43668300 | 1.23069700  |
| H | -1.93426300 | -4.70663700 | 3.33688100  |
| H | -2.71848700 | -5.88389700 | -1.19431900 |
| C | 0.58021700  | 4.63667700  | -2.30075100 |
| H | -0.18379800 | 4.40863700  | -3.03811900 |
| C | 1.61023800  | 3.75387400  | -2.10105000 |
| H | 1.65123500  | 2.84098300  | -2.68271200 |
| C | 0.49349900  | 5.84044400  | -1.54487800 |
| H | -0.32495800 | 6.53219400  | -1.72465100 |
| C | 1.43732200  | 6.11722600  | -0.59171200 |
| H | 1.38279000  | 7.03157500  | -0.00499100 |
| C | 2.24052700  | -2.95061400 | 5.05558300  |
| H | 3.06285900  | -2.53687400 | 5.63301500  |
| C | 1.01376300  | -3.26383300 | 5.70838200  |

|   |             |             |            |
|---|-------------|-------------|------------|
| H | 0.91481800  | -3.09837600 | 6.77776600 |
| C | -0.03647800 | -3.76230900 | 4.98534700 |
| H | -0.98203300 | -3.99676600 | 5.46856500 |
| C | 2.39141200  | -3.15623000 | 3.70874000 |
| H | 3.32384300  | -2.89223600 | 3.22431800 |
| C | 1.08917800  | 2.86192000  | 2.37889700 |
| H | 1.62882400  | 3.70037000  | 1.92809500 |
| H | 1.73191400  | 2.44302100  | 3.16045000 |
| H | 0.95928000  | 2.10211700  | 1.60573600 |
| C | 0.01656200  | 4.53888400  | 3.89518500 |
| H | 0.74413800  | 4.26324700  | 4.66713600 |
| H | 0.42615600  | 5.39174200  | 3.34186700 |
| H | -0.90216300 | 4.87131700  | 4.39300200 |

TS-1-2-2R

1 imaginary frequencies

H = -5198.719019

G = -5198.910972

E(M06-2X-DCM) = -5199.560738

|   |             |             |             |
|---|-------------|-------------|-------------|
| O | 1.87423700  | -1.85267100 | -0.43973300 |
| O | 3.27530400  | 0.27672300  | 0.11414600  |
| P | 1.76889800  | -0.28497600 | -0.08111300 |
| O | 1.10599600  | -0.10082600 | 1.30588800  |
| N | 1.12552300  | 0.47706800  | -1.32417300 |
| S | -0.26160300 | 0.08998300  | -2.02180600 |
| C | 0.28944900  | -0.83379300 | -3.55495000 |
| F | -0.78102800 | -1.29273700 | -4.20523900 |
| F | 1.08377200  | -1.86467100 | -3.23954900 |
| F | 0.96679800  | -0.00286400 | -4.35744800 |
| C | -0.33080200 | 1.06362400  | 4.78930500  |
| C | -0.45272300 | 2.48435300  | 4.13686800  |
| H | 0.26871900  | 3.13013000  | 4.65694200  |
| H | -1.44852000 | 2.84440300  | 4.39633300  |
| C | -1.26983500 | 3.20235800  | 1.78826200  |
| C | -2.37621200 | 3.90804000  | 2.31006300  |
| C | -1.19516900 | 3.04348100  | 0.38495100  |
| C | -3.35056200 | 4.43692900  | 1.46745600  |
| H | -2.47356900 | 4.07706600  | 3.37540300  |
| C | -2.18552100 | 3.54244300  | -0.45061900 |
| H | -0.37955500 | 2.48942800  | -0.06416300 |
| C | -3.26793400 | 4.24617600  | 0.08723500  |
| H | -4.18716400 | 4.98155600  | 1.89519000  |
| H | -2.11206800 | 3.35555100  | -1.51632600 |
| H | -4.05612700 | 4.61538500  | -0.56236000 |

|   |             |             |             |
|---|-------------|-------------|-------------|
| C | -0.20479800 | 2.67286100  | 2.65355100  |
| C | -1.45582600 | 0.11786600  | 4.29360700  |
| H | -1.24366600 | -0.89606200 | 4.65485200  |
| H | -2.40719500 | 0.42661800  | 4.72992800  |
| N | -1.68233900 | 0.08131000  | 2.85259700  |
| C | -2.93312600 | 0.15554800  | 2.29318000  |
| N | -2.94348100 | -0.11558600 | 0.95037700  |
| C | -4.04265700 | -0.05609900 | 0.05968300  |
| C | -4.95109000 | 1.00846000  | 0.05112800  |
| C | -4.16616700 | -1.07034900 | -0.89366900 |
| C | -5.97312400 | 1.03767000  | -0.89651200 |
| C | -5.19748800 | -1.02967300 | -1.83334700 |
| H | -3.44809700 | -1.88170400 | -0.91040500 |
| C | -6.11272800 | 0.02029500  | -1.84252800 |
| H | -6.91390100 | 0.04886000  | -2.56980300 |
| C | -5.30541600 | -2.16050400 | -2.81968600 |
| C | -6.87987800 | 2.23767200  | -0.93413100 |
| F | -4.17264500 | -2.30751600 | -3.54410200 |
| F | -5.51180600 | -3.35018800 | -2.19427500 |
| F | -6.32236400 | -1.99112600 | -3.69019100 |
| F | -8.00756500 | 2.00636800  | -1.63990800 |
| F | -7.24654600 | 2.63561600  | 0.30245100  |
| F | -6.26750000 | 3.30539400  | -1.51470400 |
| S | -4.31992400 | 0.54710400  | 3.17578600  |
| H | -4.85396300 | 1.80535400  | 0.77432300  |
| C | 1.06156700  | 2.40286300  | 2.13274300  |
| H | -2.09131800 | -0.45815100 | 0.50621000  |
| H | 1.88205800  | 2.29527000  | 2.83861500  |
| H | 1.34395200  | 2.87564600  | 1.19418400  |
| O | -1.05510300 | -0.88377900 | -1.23967800 |
| H | -0.93751500 | -0.31456900 | 2.28414900  |
| O | -0.92763700 | 1.28412100  | -2.54458900 |
| H | 1.01041100  | 1.08283900  | 1.69258900  |
| C | 5.39716800  | 0.61380800  | -3.48115500 |
| C | 5.27103200  | -0.61902800 | -2.85113800 |
| C | 4.66768600  | -0.71905300 | -1.58618600 |
| C | 4.22550500  | 1.68496800  | -1.62009700 |
| C | 4.91532500  | 1.75603200  | -2.84139400 |
| C | 2.65173300  | -2.79899500 | 0.23847300  |
| C | 4.02690900  | -2.82937000 | 0.00844200  |
| C | 4.81399900  | -3.73065000 | 0.74426300  |
| C | 4.22580000  | -4.66103500 | 1.59347300  |
| C | 2.83882100  | -4.68178600 | 1.71891900  |
| C | 2.01628500  | -3.74376700 | 1.06907000  |

|   |             |             |             |
|---|-------------|-------------|-------------|
| H | 5.04015000  | 2.72984800  | -3.30511800 |
| H | 2.36566900  | -5.42874100 | 2.34852700  |
| C | 4.90238500  | -2.11916600 | -1.02438000 |
| C | 4.97995600  | -2.93409200 | -2.35890500 |
| H | 3.95959700  | -3.13292300 | -2.70668900 |
| H | 5.48711100  | -3.89560300 | -2.23432700 |
| H | 6.67696300  | -4.33603200 | -0.18248500 |
| H | 6.89470000  | -3.51406400 | 1.35858100  |
| C | 4.07543500  | 0.41371100  | -1.03678300 |
| H | 5.87106200  | 0.69381600  | -4.45608900 |
| H | 4.83466100  | -5.37436700 | 2.14307600  |
| C | 5.69150100  | -1.98528900 | -3.34847600 |
| H | 5.39171600  | -2.15868700 | -4.38809000 |
| H | 6.78259600  | -2.10927100 | -3.31097800 |
| C | 6.28292500  | -3.52791900 | 0.44935600  |
| C | 6.28814300  | -2.17749300 | -0.29374800 |
| H | 6.33715900  | -1.35588400 | 0.43033300  |
| H | 7.12869900  | -2.06228700 | -0.98411200 |
| C | 0.53571000  | -3.81794300 | 1.26895400  |
| C | 0.00287200  | -3.71687200 | 2.58178200  |
| C | -0.32354100 | -4.08967100 | 0.17304800  |
| C | 0.80584400  | -3.44918900 | 3.73963600  |
| C | -1.41696600 | -3.89586400 | 2.79169800  |
| C | -1.74699100 | -4.21160200 | 0.39537500  |
| C | 0.26561700  | -3.43637200 | 5.00056300  |
| H | 1.86487800  | -3.25875800 | 3.61254500  |
| C | -1.94344600 | -3.85766200 | 4.12125000  |
| C | -2.25282300 | -4.11632400 | 1.69398200  |
| C | -1.12724800 | -3.65467600 | 5.20136500  |
| H | 0.90730700  | -3.25051600 | 5.85816700  |
| H | -3.01294200 | -4.00088700 | 4.25296300  |
| H | -3.32251100 | -4.22902000 | 1.85659500  |
| H | -1.53758600 | -3.64443000 | 6.20738200  |
| C | 3.72306100  | 2.94312800  | -0.98563200 |
| C | 2.72090700  | 3.71127300  | -1.62949500 |
| C | 4.32249200  | 3.40983500  | 0.21214900  |
| C | 2.05479800  | 3.27938600  | -2.82202700 |
| C | 2.32410800  | 4.98233400  | -1.06341200 |
| C | 3.89747700  | 4.67087300  | 0.77757600  |
| C | 1.09825400  | 4.05466400  | -3.42268400 |
| H | 2.28857500  | 2.30483400  | -3.23120100 |
| C | 1.32708300  | 5.76368600  | -1.72769200 |
| C | 2.91757000  | 5.42253700  | 0.12279400  |
| C | 0.73484500  | 5.31920900  | -2.87829600 |

|   |             |             |             |
|---|-------------|-------------|-------------|
| H | 0.59352000  | 3.68914000  | -4.31184900 |
| H | 1.04806700  | 6.71980300  | -1.29129000 |
| H | 2.61170200  | 6.37757400  | 0.54552600  |
| H | -0.02352000 | 5.92004100  | -3.37284500 |
| C | -0.71510700 | -4.50603200 | -2.20399600 |
| H | -0.32450000 | -4.62947000 | -3.21018000 |
| C | 0.14879100  | -4.28201900 | -1.16441800 |
| H | 1.21421400  | -4.24614300 | -1.35705100 |
| C | -2.11997200 | -4.57022200 | -1.98626400 |
| H | -2.79439200 | -4.71504900 | -2.82444500 |
| C | -2.61609300 | -4.44260700 | -0.71738200 |
| H | -3.68591400 | -4.50203200 | -0.53558300 |
| C | 5.91889700  | 3.17969600  | 2.05147900  |
| H | 6.70887400  | 2.61857400  | 2.54361400  |
| C | 5.47842100  | 4.41059700  | 2.61570300  |
| H | 5.92964900  | 4.77483800  | 3.53465900  |
| C | 4.49926000  | 5.13354300  | 1.98994400  |
| H | 4.16156700  | 6.08234300  | 2.40056300  |
| C | 5.36439300  | 2.70062600  | 0.89319500  |
| H | 5.72513200  | 1.76837000  | 0.47373800  |
| C | -0.57656200 | 1.26822500  | 6.30254600  |
| H | 0.23288600  | 1.85119100  | 6.75737200  |
| H | -1.52229900 | 1.78854200  | 6.49261700  |
| H | -0.61816100 | 0.30113800  | 6.81686200  |
| C | 1.06108200  | 0.42015000  | 4.63597600  |
| H | 1.85203300  | 1.10821800  | 4.95946400  |
| H | 1.11754200  | -0.46891100 | 5.27368700  |
| H | 1.28410600  | 0.09305300  | 3.61998100  |

TS-EF-1S-B3LYP-D3 (BJ)

1 imaginary frequencies

H = -5199.192896

G = -5199.374211

E(M06-2X-DCM) = -5199.57817

|   |            |             |             |
|---|------------|-------------|-------------|
| O | 2.29432700 | -1.78133500 | -0.21143600 |
| O | 2.52865500 | 0.77811500  | 0.03842100  |
| P | 1.41351600 | -0.41311700 | -0.10944500 |
| O | 0.62456500 | -0.36681400 | 1.16715700  |
| C | 4.53261400 | -2.71865300 | 3.18971500  |
| C | 5.05549700 | -1.89731200 | 2.19554500  |
| C | 4.32246900 | -1.64836400 | 1.02782400  |
| C | 2.46800800 | -2.97251900 | 1.89802400  |
| C | 3.25946300 | -3.26696600 | 3.02090000  |
| C | 3.48046500 | 0.92360000  | -0.97347900 |



|   |              |              |              |
|---|--------------|--------------|--------------|
| C | 4. 59349400  | 0. 08745300  | -1. 00536500 |
| C | 5. 43867700  | 0. 12743600  | -2. 12593400 |
| C | 5. 22918000  | 1. 04969500  | -3. 14499300 |
| C | 4. 16953900  | 1. 94974800  | -3. 03785800 |
| C | 3. 27132400  | 1. 89925500  | -1. 96147200 |
| H | 2. 84213500  | -3. 91260200 | 3. 78734900  |
| H | 4. 00666000  | 2. 69675900  | -3. 80836800 |
| C | 5. 16386200  | -0. 87591600 | 0. 02883300  |
| C | 6. 14632300  | -0. 14578900 | 1. 00205000  |
| H | 5. 65046700  | 0. 75345700  | 1. 38517000  |
| H | 7. 07040000  | 0. 16476700  | 0. 50610500  |
| H | 7. 47558700  | -0. 51324300 | -1. 76170400 |
| H | 6. 63996900  | -1. 48262800 | -2. 97223000 |
| C | 3. 03497400  | -2. 15009700 | 0. 90895500  |
| H | 5. 10082400  | -2. 92980900 | 4. 09170800  |
| H | 5. 88349900  | 1. 07579200  | -4. 01204200 |
| C | 6. 37029300  | -1. 14952700 | 2. 15525300  |
| H | 6. 60581100  | -0. 65791500 | 3. 10545500  |
| H | 7. 20547200  | -1. 82796300 | 1. 93363800  |
| C | 6. 50092500  | -0. 94461100 | -2. 02845200 |
| C | 5. 96012900  | -1. 84637800 | -0. 90040000 |
| H | 5. 25914800  | -2. 57903200 | -1. 31503300 |
| H | 6. 74007400  | -2. 39144000 | -0. 36089700 |
| C | 2. 17447300  | 2. 90643100  | -1. 88362100 |
| C | 1. 15276500  | 2. 91310900  | -2. 85742400 |
| C | 2. 22888300  | 3. 92319000  | -0. 90133700 |
| C | 1. 00655700  | 1. 86297200  | -3. 81638700 |
| C | 0. 18965300  | 3. 98834600  | -2. 87559800 |
| C | 1. 24177600  | 4. 97812900  | -0. 91364800 |
| C | -0. 01131100 | 1. 87717600  | -4. 73029200 |
| H | 1. 68251100  | 1. 02079700  | -3. 77291100 |
| C | -0. 83428500 | 3. 98527200  | -3. 87144100 |
| C | 0. 25691100  | 4. 98792500  | -1. 90444400 |
| C | -0. 93571900 | 2. 95964800  | -4. 77130200 |
| H | -0. 13210600 | 1. 03977800  | -5. 40915500 |
| H | -1. 54800200 | 4. 80487900  | -3. 87652600 |
| H | -0. 48120800 | 5. 78651200  | -1. 91194600 |
| H | -1. 73173700 | 2. 95641200  | -5. 51055700 |
| C | 1. 07155200  | -3. 47890500 | 1. 79006700  |
| C | 0. 11691700  | -3. 10218700 | 2. 76640200  |
| C | 0. 69417500  | -4. 30242500 | 0. 70568900  |
| C | 0. 41244100  | -2. 21223400 | 3. 84768400  |
| C | -1. 23668000 | -3. 59334600 | 2. 66211600  |
| C | -0. 67377900 | -4. 74771300 | 0. 58992000  |

|   |             |             |             |
|---|-------------|-------------|-------------|
| C | -0.54135900 | -1.86622200 | 4.76917400  |
| H | 1.40884400  | -1.79388100 | 3.92033600  |
| C | -2.20382700 | -3.19858100 | 3.63684800  |
| C | -1.59301500 | -4.40662900 | 1.58251000  |
| C | -1.87126700 | -2.36125400 | 4.66687800  |
| H | -0.28638800 | -1.19393800 | 5.58397700  |
| H | -3.21913100 | -3.57177900 | 3.53022800  |
| H | -2.62209600 | -4.74295900 | 1.48904500  |
| H | -2.61692900 | -2.06051300 | 5.39657700  |
| C | 3.29759600  | 4.99952700  | 1.01504600  |
| H | 4.09532500  | 5.02647900  | 1.75235500  |
| C | 3.25296900  | 3.98304800  | 0.09608700  |
| H | 4.01372000  | 3.21131000  | 0.10837100  |
| C | 2.31585400  | 6.03110700  | 1.00565300  |
| H | 2.36943300  | 6.83300500  | 1.73700600  |
| C | 1.31638300  | 6.01244300  | 0.06941600  |
| H | 0.56383000  | 6.79681900  | 0.04502500  |
| C | 1.19162200  | -5.43462800 | -1.39452200 |
| H | 1.90434000  | -5.70958400 | -2.16665000 |
| C | -0.17103000 | -5.82166600 | -1.53097100 |
| H | -0.48727800 | -6.37307900 | -2.41146400 |
| C | -1.07315600 | -5.50072900 | -0.55589800 |
| H | -2.11851900 | -5.77786400 | -0.64782600 |
| C | 1.61042600  | -4.70955100 | -0.31218800 |
| H | 2.65157900  | -4.42279600 | -0.22691100 |
| C | 0.77548200  | 2.76688800  | 3.72558800  |
| C | 0.26919100  | 3.50448000  | 2.44347100  |
| H | 0.69656900  | 4.51623600  | 2.44732200  |
| H | 0.71740800  | 3.03434900  | 1.56892100  |
| C | -1.74062400 | 3.44009000  | 0.86044600  |
| C | -1.17676900 | 2.45745800  | 0.01881900  |
| C | -2.89485700 | 4.11919000  | 0.40891400  |
| C | -1.76977300 | 2.13134400  | -1.19266300 |
| H | -0.30792200 | 1.89705700  | 0.33472200  |
| C | -3.47516700 | 3.80439700  | -0.81356000 |
| H | -3.31840900 | 4.91937900  | 1.00647200  |
| C | -2.92297000 | 2.79716900  | -1.60798800 |
| H | -1.34124300 | 1.35464400  | -1.81132800 |
| H | -4.36843900 | 4.32808200  | -1.13827800 |
| H | -3.38709700 | 2.52539800  | -2.54877700 |
| C | -1.20490800 | 3.68638200  | 2.19906300  |
| C | -0.21444000 | 1.67044200  | 4.19032400  |
| H | -1.04921000 | 2.08179000  | 4.75386200  |
| H | 0.31492900  | 0.97776800  | 4.85651700  |

|   |             |             |             |
|---|-------------|-------------|-------------|
| N | -0.72727200 | 0.92664700  | 3.05903700  |
| C | -1.98552300 | 0.60449700  | 2.75854400  |
| N | -2.12571700 | -0.24580600 | 1.72155200  |
| C | -3.24506100 | -0.47421900 | 0.88699800  |
| C | -4.17929400 | 0.51982300  | 0.57896800  |
| C | -3.31972700 | -1.71903800 | 0.26512800  |
| C | -5.19467000 | 0.24037300  | -0.32917200 |
| C | -4.33378500 | -1.97577400 | -0.65641700 |
| H | -2.56801500 | -2.46758300 | 0.47150600  |
| C | -5.28455800 | -1.00614200 | -0.95433100 |
| H | -6.07781100 | -1.21149600 | -1.66214300 |
| C | -4.36469500 | -3.32234600 | -1.32777600 |
| C | -6.17416200 | 1.31327000  | -0.71257300 |
| F | -3.31329300 | -3.51102400 | -2.14251300 |
| F | -5.48656300 | -3.49757500 | -2.05983100 |
| F | -4.33117700 | -4.32782900 | -0.40879100 |
| F | -7.43432000 | 0.83204900  | -0.79401700 |
| F | -5.88806500 | 1.84383400  | -1.92972000 |
| F | -6.18612400 | 2.33923900  | 0.16633600  |
| S | -3.33013600 | 1.25439900  | 3.64458200  |
| H | -4.10500800 | 1.50119800  | 1.02151600  |
| H | -1.24544400 | -0.64883900 | 1.37723400  |
| H | -0.01977300 | 0.51358500  | 2.43349500  |
| C | -2.08682900 | 4.01587900  | 3.22875300  |
| H | -1.68676900 | 4.36740200  | 4.17525200  |
| H | -2.62247300 | 2.76941600  | 3.51606300  |
| H | -3.05961600 | 4.42933600  | 2.96749500  |
| N | 0.70392800  | -0.20090500 | -1.53048700 |
| S | -0.34134700 | -1.26256900 | -2.11045100 |
| O | -1.37636300 | -0.59132600 | -2.90496600 |
| O | -0.75244100 | -2.28152200 | -1.13041600 |
| C | 0.66855100  | -2.18602400 | -3.38194900 |
| F | 0.97446000  | -1.37045200 | -4.40680400 |
| F | -0.04113000 | -3.21620900 | -3.85207000 |
| F | 1.80843700  | -2.64525300 | -2.85771800 |
| C | 2.12430100  | 2.11342200  | 3.35774700  |
| H | 2.81877400  | 2.86757500  | 2.97427100  |
| H | 2.57687800  | 1.64402500  | 4.23919900  |
| H | 2.01550800  | 1.35298900  | 2.57880300  |
| C | 1.00887600  | 3.73399100  | 4.89816300  |
| H | 1.36463500  | 3.19012800  | 5.78119000  |
| H | 1.77121300  | 4.47490600  | 4.63456000  |
| H | 0.10143200  | 4.27371300  | 5.18657200  |

TS-EF-1S-1-B3LYP-D3 (BJ)

1 imaginary frequencies

H = -5199.184356

G = -5199.36683

E(M06-2X-DCM) = -5199.57346

|   |            |             |             |
|---|------------|-------------|-------------|
| O | 1.93475300 | -2.28511200 | -0.38049800 |
| O | 2.82376300 | 0.12230100  | -0.05793400 |
| P | 1.44727900 | -0.72364600 | -0.35076600 |
| O | 0.53939800 | -0.44839700 | 0.81251900  |
| C | 4.14837000 | -3.76576900 | 2.84501800  |
| C | 4.77732500 | -3.12522900 | 1.78235400  |
| C | 4.03501800 | -2.66764900 | 0.68472800  |
| C | 1.98620400 | -3.44857700 | 1.74901700  |
| C | 2.76406000 | -3.93706500 | 2.81075400  |
| C | 3.77360500 | 0.15433400  | -1.08232600 |
| C | 4.59178700 | -0.94715100 | -1.29592400 |
| C | 5.33809100 | -1.02140200 | -2.48128200 |
| C | 5.35549500 | 0.04587000  | -3.37311500 |
| C | 4.64970000 | 1.20905500  | -3.05528600 |
| C | 3.84371100 | 1.28558300  | -1.91115300 |
| H | 2.25757900 | -4.44225600 | 3.62748700  |
| H | 4.70168100 | 2.07492300  | -3.70818900 |
| C | 4.95585500 | -2.11161300 | -0.38773000 |
| C | 6.19918100 | -1.72934500 | 0.48549700  |
| H | 6.02126400 | -0.74141100 | 0.92548600  |
| H | 7.11865400 | -1.67369400 | -0.10390700 |
| H | 7.11272100 | -2.26566500 | -2.41114000 |
| H | 5.90556400 | -2.82641700 | -3.56391600 |
| C | 2.65219800 | -2.80282700 | 0.69302200  |
| H | 4.72260300 | -4.12664800 | 3.69405400  |
| H | 5.92667700 | -0.01031600 | -4.29566500 |
| C | 6.24086900 | -2.79244300 | 1.60168900  |
| H | 6.70984800 | -2.42632500 | 2.52139000  |
| H | 6.80887900 | -3.67816000 | 1.28509600  |
| C | 6.03159700 | -2.36414900 | -2.57903800 |
| C | 5.35982200 | -3.17999200 | -1.44970100 |
| H | 4.44872000 | -3.65759100 | -1.82577700 |
| H | 6.00459400 | -3.95899500 | -1.03180100 |
| C | 3.19349400 | 2.57531900  | -1.53222800 |
| C | 2.10803200 | 3.09685300  | -2.26826800 |
| C | 3.76299200 | 3.32455700  | -0.47424500 |
| C | 1.49834000 | 2.37835800  | -3.34209600 |
| C | 1.58357200 | 4.40434400  | -1.93949800 |
| C | 3.20908700 | 4.61432200  | -0.13421400 |

|   |             |             |             |
|---|-------------|-------------|-------------|
| C | 0.47072300  | 2.92662700  | -4.06299100 |
| H | 1.83529000  | 1.37355900  | -3.55781100 |
| C | 0.51667500  | 4.94126400  | -2.72149000 |
| C | 2.13673600  | 5.11834400  | -0.87449900 |
| C | -0.01644600 | 4.22937600  | -3.76076800 |
| H | 0.00477000  | 2.34118100  | -4.84751300 |
| H | 0.13207400  | 5.92446800  | -2.46283200 |
| H | 1.73357100  | 6.09832900  | -0.62698800 |
| H | -0.83359300 | 4.64446900  | -4.34387600 |
| C | 0.50664800  | -3.62757600 | 1.76090200  |
| C | -0.27539800 | -2.95763200 | 2.72930800  |
| C | -0.10316000 | -4.48550700 | 0.81981700  |
| C | 0.28604600  | -2.06931400 | 3.70017100  |
| C | -1.70580100 | -3.15214700 | 2.74669100  |
| C | -1.53623400 | -4.66179700 | 0.83921400  |
| C | -0.50195500 | -1.44741000 | 4.63258400  |
| H | 1.35466100  | -1.89102400 | 3.68508600  |
| C | -2.49421000 | -2.45740500 | 3.71456700  |
| C | -2.29702800 | -3.99885500 | 1.80469100  |
| C | -1.91330700 | -1.63262200 | 4.63899700  |
| H | -0.04955900 | -0.79443100 | 5.37371900  |
| H | -3.57149400 | -2.60017200 | 3.69703900  |
| H | -3.37694000 | -4.12209600 | 1.80381900  |
| H | -2.52255900 | -1.10801300 | 5.36815600  |
| C | 5.43748300  | 3.62528600  | 1.28076400  |
| H | 6.30488600  | 3.26042400  | 1.82327800  |
| C | 4.90416600  | 2.87645000  | 0.26447800  |
| H | 5.35251600  | 1.92516300  | 0.00355100  |
| C | 4.86411900  | 4.87882100  | 1.63722900  |
| H | 5.29593700  | 5.45793500  | 2.44857500  |
| C | 3.78274800  | 5.35572400  | 0.94492600  |
| H | 3.34931700  | 6.32249900  | 1.19100400  |
| C | 0.01442100  | -5.97266700 | -1.10779700 |
| H | 0.60094900  | -6.48604100 | -1.86429500 |
| C | -1.40176400 | -6.12016600 | -1.10167000 |
| H | -1.88072100 | -6.73524400 | -1.85790700 |
| C | -2.15297900 | -5.48861700 | -0.14933900 |
| H | -3.23469900 | -5.57821400 | -0.14072900 |
| C | 0.64164500  | -5.18886500 | -0.17717200 |
| H | 1.72011600  | -5.08579300 | -0.19479800 |
| C | 1.09004000  | 2.91932800  | 3.19960400  |
| C | 0.54230600  | 3.68851900  | 1.95619700  |
| H | 1.09938400  | 4.63389000  | 1.88061900  |
| H | 0.82337000  | 3.14677600  | 1.05251800  |

|   |             |             |             |
|---|-------------|-------------|-------------|
| C | -1.59233800 | 3.98910100  | 0.57159600  |
| C | -1.28734000 | 2.98916100  | -0.37642600 |
| C | -2.65319900 | 4.88082200  | 0.28514500  |
| C | -2.03572500 | 2.87134500  | -1.54322200 |
| H | -0.51663900 | 2.25270100  | -0.18354300 |
| C | -3.38652600 | 4.76656600  | -0.88714300 |
| H | -2.87508300 | 5.68978000  | 0.97267600  |
| C | -3.08344000 | 3.75378100  | -1.80057400 |
| H | -1.81383100 | 2.06519000  | -2.22699900 |
| H | -4.19704000 | 5.46043500  | -1.08709600 |
| H | -3.67369100 | 3.64260400  | -2.70378900 |
| C | -0.91203300 | 4.05932300  | 1.86493900  |
| C | 0.06159200  | 1.89315400  | 3.73255700  |
| H | -0.70750600 | 2.35084500  | 4.35084500  |
| H | 0.58853700  | 1.16551400  | 4.36050200  |
| N | -0.57157600 | 1.18714600  | 2.63804600  |
| C | -1.87121800 | 0.98615700  | 2.40923200  |
| N | -2.14770200 | 0.17662900  | 1.37070300  |
| C | -3.36752900 | -0.00133700 | 0.68161200  |
| C | -4.22537500 | 1.06015500  | 0.38405700  |
| C | -3.62681300 | -1.27254000 | 0.17768800  |
| C | -5.35651800 | 0.82355100  | -0.39026200 |
| C | -4.76481300 | -1.49389500 | -0.59505500 |
| H | -2.92649400 | -2.07581100 | 0.36656900  |
| C | -5.64331100 | -0.45342400 | -0.88024900 |
| H | -6.52736700 | -0.62726200 | -1.48086900 |
| C | -5.01310900 | -2.88780000 | -1.09903900 |
| C | -6.23729000 | 1.97344800  | -0.78995800 |
| F | -3.96050900 | -3.36233400 | -1.79509900 |
| F | -6.10004200 | -2.96312300 | -1.89279100 |
| F | -5.21302000 | -3.75624800 | -0.06790000 |
| F | -6.09146700 | 3.04043800  | 0.02570700  |
| F | -7.54419800 | 1.62982300  | -0.78324700 |
| F | -5.95787900 | 2.40101600  | -2.04749800 |
| S | -3.10505900 | 1.72903700  | 3.38047300  |
| H | -4.00304300 | 2.05836900  | 0.73066800  |
| H | -1.33396200 | -0.27125500 | 0.92886000  |
| H | 0.06025000  | 0.66853700  | 2.01033400  |
| C | -1.66897200 | 4.39444600  | 2.99125200  |
| H | -1.15893700 | 4.63675900  | 3.91816800  |
| H | -2.27135500 | 3.21469100  | 3.23714400  |
| H | -2.60687900 | 4.92661200  | 2.84028700  |
| N | 1.03550400  | -0.43164000 | -1.86769400 |
| S | -0.42035900 | -0.55274000 | -2.48280700 |

|   |             |             |             |
|---|-------------|-------------|-------------|
| O | -0.42153000 | -0.09571600 | -3.87407300 |
| O | -1.49087300 | -0.06705400 | -1.58701500 |
| C | -0.76589700 | -2.38426000 | -2.57059000 |
| F | 0.29102400  | -3.06124300 | -3.02410500 |
| F | -1.81040700 | -2.61346200 | -3.36993300 |
| F | -1.06116300 | -2.81791600 | -1.33501600 |
| C | 2.35290500  | 2.16759700  | 2.73726100  |
| H | 3.09538800  | 2.86668500  | 2.34939800  |
| H | 2.80460500  | 1.63111900  | 3.58026500  |
| H | 2.14355200  | 1.44214600  | 1.94661700  |
| C | 1.49517700  | 3.86293900  | 4.34444300  |
| H | 1.88317900  | 3.28726700  | 5.19288900  |
| H | 2.29060000  | 4.53749600  | 4.01000600  |
| H | 0.66578600  | 4.47370300  | 4.71377200  |

TS-EF-1S-2-B3LYP-D3 (BJ)

1 imaginary frequencies

H = -5199.184665

G = -5199.366202

E(M06-2X-DCM) = -5199.571799

|   |             |            |             |
|---|-------------|------------|-------------|
| O | 0.92538100  | 2.66560100 | -0.02944100 |
| O | 2.51485500  | 0.63588500 | -0.27854700 |
| P | 1.06351500  | 1.08217500 | 0.35414100  |
| O | 0.05641600  | 0.25881400 | -0.39941600 |
| C | 1.38740300  | 3.88367100 | -4.00888300 |
| C | 2.48905400  | 3.72440300 | -3.17530500 |
| C | 2.31819700  | 3.35947000 | -1.83263800 |
| C | -0.09311800 | 3.21079500 | -2.17640500 |
| C | 0.11233400  | 3.64966800 | -3.49657600 |
| C | 3.66468700  | 1.16601500 | 0.31158600  |
| C | 4.03023800  | 2.47873500 | 0.04222500  |
| C | 5.01079900  | 3.09057400 | 0.83643100  |
| C | 5.69632700  | 2.35844600 | 1.80025400  |
| C | 5.42367000  | 0.99581400 | 1.93807500  |
| C | 4.40465400  | 0.37326200 | 1.20231400  |
| H | -0.75785300 | 3.78475600 | -4.13088700 |
| H | 5.99194300  | 0.39349200 | 2.64005400  |
| C | 3.64925000  | 3.40533400 | -1.10124900 |
| C | 4.63174300  | 3.18575100 | -2.30119200 |
| H | 4.70087600  | 2.10941200 | -2.49755500 |
| H | 5.63879500  | 3.55302700 | -2.08552900 |
| H | 6.08511900  | 4.74126500 | -0.07066200 |
| H | 5.15138100  | 5.20477400 | 1.34831400  |
| C | 1.04368800  | 3.07348200 | -1.35492600 |

|   |              |              |              |
|---|--------------|--------------|--------------|
| H | 1. 51281500  | 4. 18794700  | -5. 04452700 |
| H | 6. 45177100  | 2. 82951600  | 2. 42302500  |
| C | 3. 95689600  | 3. 88718900  | -3. 49631200 |
| H | 4. 23117900  | 3. 44577400  | -4. 46062300 |
| H | 4. 23409100  | 4. 94931700  | -3. 54216800 |
| C | 5. 14651800  | 4. 55300300  | 0. 46813900  |
| C | 3. 91895300  | 4. 79265500  | -0. 44112200 |
| H | 3. 04958100  | 5. 06148000  | 0. 16840900  |
| H | 4. 07218600  | 5. 58341400  | -1. 18155600 |
| C | 4. 22280500  | -1. 10559200 | 1. 29289400  |
| C | 3. 72586400  | -1. 70672800 | 2. 46790700  |
| C | 4. 67985900  | -1. 91012000 | 0. 22104400  |
| C | 3. 20938600  | -0. 93786400 | 3. 55577000  |
| C | 3. 71881500  | -3. 14668000 | 2. 58751300  |
| C | 4. 62314000  | -3. 34928500 | 0. 33506500  |
| C | 2. 74437800  | -1. 54638900 | 4. 69137700  |
| H | 3. 14847200  | 0. 13747700  | 3. 45567200  |
| C | 3. 25976200  | -3. 73852600 | 3. 80294700  |
| C | 4. 15100900  | -3. 92797600 | 1. 51568300  |
| C | 2. 78954700  | -2. 96286300 | 4. 82745500  |
| H | 2. 31397100  | -0. 93783300 | 5. 47845500  |
| H | 3. 27526900  | -4. 82209500 | 3. 88363000  |
| H | 4. 12210200  | -5. 01135700 | 1. 60215100  |
| H | 2. 43110800  | -3. 42439000 | 5. 74347200  |
| C | -1. 47685300 | 2. 91216300  | -1. 70975700 |
| C | -2. 25046500 | 1. 93380000  | -2. 38450000 |
| C | -2. 03916200 | 3. 64257800  | -0. 63825800 |
| C | -1. 76480500 | 1. 18093800  | -3. 50079400 |
| C | -3. 60123400 | 1. 66586400  | -1. 94530700 |
| C | -3. 37450700 | 3. 33235400  | -0. 18352300 |
| C | -2. 56211800 | 0. 28211000  | -4. 16058800 |
| H | -0. 74298100 | 1. 33241100  | -3. 82775700 |
| C | -4. 39510500 | 0. 71064700  | -2. 65058100 |
| C | -4. 11277100 | 2. 34615900  | -0. 83800100 |
| C | -3. 89664900 | 0. 03989800  | -3. 73475700 |
| H | -2. 16814000 | -0. 26795700 | -5. 01065700 |
| H | -5. 40534200 | 0. 52075600  | -2. 30095200 |
| H | -5. 11522000 | 2. 11186500  | -0. 48851800 |
| H | -4. 51017700 | -0. 68194100 | -4. 26560400 |
| C | 5. 68666900  | -2. 16741800 | -1. 99255800 |
| H | 6. 11630600  | -1. 72184900 | -2. 88558100 |
| C | 5. 24016600  | -1. 36211300 | -0. 97607000 |
| H | 5. 31987300  | -0. 28514000 | -1. 06764900 |
| C | 5. 60345200  | -3. 58509900 | -1. 88625000 |



|   |             |             |             |
|---|-------------|-------------|-------------|
| H | 5.96099400  | -4.20923800 | -2.70039600 |
| C | 5.08483300  | -4.15313500 | -0.75230300 |
| H | 5.02572400  | -5.23405200 | -0.65070100 |
| C | -1.90608800 | 5.37389700  | 1.07339500  |
| H | -1.35240200 | 6.17010700  | 1.56224200  |
| C | -3.20557000 | 5.03464000  | 1.54527400  |
| H | -3.62557100 | 5.56729900  | 2.39338000  |
| C | -3.91885400 | 4.04498600  | 0.92825300  |
| H | -4.90968000 | 3.77063100  | 1.27745600  |
| C | -1.34419200 | 4.70352700  | 0.02089600  |
| H | -0.35487800 | 4.97701500  | -0.32466100 |
| C | 1.75987900  | -1.96164500 | -3.43171200 |
| C | 2.04338800  | -2.70344600 | -2.09540100 |
| H | 3.05921700  | -3.12030000 | -2.14327400 |
| H | 2.09435000  | -1.97485400 | -1.28416600 |
| C | 0.96513200  | -4.04667800 | -0.22147600 |
| C | 0.72041500  | -2.96157200 | 0.64350000  |
| C | 0.94605900  | -5.35368500 | 0.30820800  |
| C | 0.41923500  | -3.18343300 | 1.98267400  |
| H | 0.70042800  | -1.94679600 | 0.26480500  |
| C | 0.68469600  | -5.56751300 | 1.65579600  |
| H | 1.18080700  | -6.19523400 | -0.33591300 |
| C | 0.40403800  | -4.48303100 | 2.48974800  |
| H | 0.19592300  | -2.33570500 | 2.61863900  |
| H | 0.69520800  | -6.57811700 | 2.05390700  |
| H | 0.18711700  | -4.64616500 | 3.54062500  |
| C | 1.16809300  | -3.84500900 | -1.65804000 |
| C | 0.23899200  | -1.81320700 | -3.65833200 |
| H | -0.20696400 | -2.70840700 | -4.08433500 |
| H | 0.06148800  | -0.99826100 | -4.37167400 |
| N | -0.44159900 | -1.49422900 | -2.41645600 |
| C | -1.59772000 | -1.97967400 | -1.94969800 |
| N | -2.09657200 | -1.31328600 | -0.89250100 |
| C | -3.33474500 | -1.36192200 | -0.23291900 |
| C | -3.37301800 | -0.73201000 | 1.01726100  |
| C | -4.50941100 | -1.85600600 | -0.80275600 |
| C | -4.58913800 | -0.57191900 | 1.67303300  |
| C | -5.71506900 | -1.69394500 | -0.12252900 |
| H | -4.50172300 | -2.31940100 | -1.77810900 |
| C | -5.77310200 | -1.04672700 | 1.11035900  |
| H | -6.71864900 | -0.91461200 | 1.62010500  |
| C | -6.98302100 | -2.09739900 | -0.81868900 |
| C | -4.61510400 | 0.20564300  | 2.96240500  |
| F | -7.39023700 | -1.12707700 | -1.68178900 |

|   |             |             |             |
|---|-------------|-------------|-------------|
| F | -7.99867400 | -2.30474400 | 0.04324900  |
| F | -6.82618200 | -3.22093900 | -1.55004600 |
| F | -3.60149100 | -0.13305200 | 3.77636000  |
| F | -5.77106000 | 0.01749400  | 3.63929300  |
| F | -4.50904000 | 1.53664600  | 2.72470600  |
| S | -2.28791600 | -3.43172800 | -2.60149900 |
| H | -2.45561600 | -0.36636000 | 1.46692400  |
| H | -1.47334200 | -0.57670600 | -0.53521900 |
| H | -0.07692500 | -0.68652400 | -1.89639200 |
| C | 0.50926000  | -4.70341100 | -2.53602900 |
| H | 0.80093500  | -4.73706200 | -3.58125000 |
| H | -0.75842100 | -4.10959200 | -2.60366500 |
| H | 0.12745400  | -5.64147900 | -2.13474500 |
| N | 1.21759100  | 1.08469700  | 1.93609000  |
| S | 0.14995500  | 0.77757100  | 3.06871400  |
| O | 0.77102200  | 0.90617200  | 4.38718800  |
| O | -0.69441900 | -0.40347400 | 2.79339700  |
| C | -1.06291100 | 2.18569100  | 2.96117300  |
| F | -0.43212300 | 3.36127500  | 2.95175800  |
| F | -1.91291700 | 2.15040500  | 3.98781200  |
| F | -1.75851000 | 2.05272200  | 1.81726000  |
| C | 2.38877200  | -0.55629500 | -3.32896400 |
| H | 3.45397100  | -0.63189800 | -3.09165800 |
| H | 2.28253500  | -0.02039500 | -4.27953100 |
| H | 1.93220400  | 0.04669400  | -2.54098700 |
| C | 2.38587800  | -2.67227700 | -4.64322500 |
| H | 2.15944400  | -2.12808200 | -5.56779800 |
| H | 3.47502700  | -2.70806400 | -4.53490400 |
| H | 2.02975000  | -3.69894300 | -4.76820500 |

TS-EF-1R-B3LYP-D3 (BJ)

1 imaginary frequencies

H = -5199.185456

G = -5199.367502

E(M06-2X-DCM) = -5199.571972

|   |             |             |             |
|---|-------------|-------------|-------------|
| O | -3.18844700 | 0.46088500  | -0.98872000 |
| O | -2.12130100 | -1.52070000 | 0.27739400  |
| P | -1.73816000 | -0.18579800 | -0.60416400 |
| O | -0.93942600 | 0.66056300  | 0.34287700  |
| C | -5.68853100 | 1.51699100  | 2.18685400  |
| C | -5.68540000 | 0.21760500  | 1.68920200  |
| C | -4.89843000 | -0.11705200 | 0.57819600  |
| C | -4.04428900 | 2.16782900  | 0.49708500  |
| C | -4.89556800 | 2.48482500  | 1.56827100  |

|   |             |             |             |
|---|-------------|-------------|-------------|
| C | -2.81091400 | -2.55644200 | -0.34890100 |
| C | -4.18231500 | -2.45508500 | -0.52790700 |
| C | -4.83238500 | -3.39207700 | -1.34422100 |
| C | -4.13195400 | -4.46911100 | -1.87891400 |
| C | -2.77871900 | -4.62724300 | -1.56508100 |
| C | -2.09308100 | -3.67576800 | -0.79836700 |
| H | -4.91324800 | 3.50960300  | 1.92576500  |
| H | -2.23202100 | -5.49350000 | -1.92490400 |
| C | -5.20080900 | -1.53587100 | 0.12473100  |
| C | -5.70603200 | -2.15358100 | 1.47094400  |
| H | -4.83285400 | -2.45764900 | 2.05992000  |
| H | -6.33012000 | -3.03787200 | 1.31395900  |
| H | -6.93738500 | -3.69385200 | -0.92541200 |
| H | -6.62646600 | -3.07683100 | -2.54515100 |
| C | -4.04859800 | 0.83881700  | 0.03597200  |
| H | -6.30729000 | 1.78282900  | 3.03974100  |
| H | -4.63145800 | -5.19422700 | -2.51552300 |
| C | -6.43760400 | -0.99725200 | 2.18459100  |
| H | -6.41705300 | -1.09055000 | 3.27584600  |
| H | -7.49483600 | -0.95375500 | 1.88906700  |
| C | -6.29127600 | -3.01956700 | -1.50404600 |
| C | -6.33930100 | -1.57925900 | -0.94331200 |
| H | -6.09726400 | -0.86370600 | -1.73664100 |
| H | -7.31283600 | -1.30555800 | -0.52581700 |
| C | -0.68458100 | -3.88665700 | -0.35626700 |
| C | 0.39401200  | -3.81015000 | -1.26197300 |
| C | -0.45567300 | -4.20932000 | 1.00273300  |
| C | 0.21212100  | -3.49802700 | -2.64424400 |
| C | 1.74031200  | -4.04220700 | -0.78725700 |
| C | 0.89566600  | -4.40087000 | 1.47228700  |
| C | 1.27747800  | -3.45158300 | -3.50363900 |
| H | -0.78166900 | -3.25477200 | -2.99784400 |
| C | 2.82134700  | -3.99252700 | -1.71987200 |
| C | 1.95717100  | -4.30323100 | 0.56786900  |
| C | 2.59782900  | -3.71313400 | -3.04193500 |
| H | 1.11693600  | -3.17012200 | -4.53792100 |
| H | 3.83122700  | -4.15735300 | -1.35382300 |
| H | 2.97316700  | -4.45097600 | 0.92543000  |
| H | 3.43290100  | -3.65109800 | -3.73236200 |
| C | -3.19433800 | 3.21416800  | -0.13801000 |
| C | -2.22413600 | 3.90350200  | 0.62668400  |
| C | -3.39338500 | 3.54713100  | -1.49917100 |
| C | -1.98477500 | 3.63126100  | 2.01019500  |
| C | -1.42548000 | 4.93420800  | 0.00501500  |

|   |             |             |             |
|---|-------------|-------------|-------------|
| C | -2.57622400 | 4.56780900  | -2.11092200 |
| C | -1.06150300 | 4.34420100  | 2.72979500  |
| H | -2.54963400 | 2.84106900  | 2.48878600  |
| C | -0.45849500 | 5.63859400  | 0.78665300  |
| C | -1.61523300 | 5.23027000  | -1.34554400 |
| C | -0.28468200 | 5.36411400  | 2.11483800  |
| H | -0.90625500 | 4.11858500  | 3.78103000  |
| H | 0.13662800  | 6.40433000  | 0.29564200  |
| H | -1.00420500 | 6.00023800  | -1.81127700 |
| H | 0.45562500  | 5.90403700  | 2.69756300  |
| C | -1.26578300 | -4.71019600 | 3.25455900  |
| H | -2.09278600 | -4.85276700 | 3.94494500  |
| C | -1.51904000 | -4.38717800 | 1.94581500  |
| H | -2.54215500 | -4.27911100 | 1.60502400  |
| C | 0.07091500  | -4.86498200 | 3.71881400  |
| H | 0.25462000  | -5.11163000 | 4.76066800  |
| C | 1.11738500  | -4.71142700 | 2.84932500  |
| H | 2.14290400  | -4.82746200 | 3.18750800  |
| C | -4.55534700 | 3.26672500  | -3.62684200 |
| H | -5.32261100 | 2.77708200  | -4.21955400 |
| C | -3.72585400 | 4.25136800  | -4.23245900 |
| H | -3.86058700 | 4.49743900  | -5.28166400 |
| C | -2.76899400 | 4.88598200  | -3.48974300 |
| H | -2.13359700 | 5.64774600  | -3.93426100 |
| C | -4.39690200 | 2.93023900  | -2.30927500 |
| H | -5.04549900 | 2.18542200  | -1.86485300 |
| N | -1.19340700 | -0.64580600 | -2.03605500 |
| S | 0.04701100  | -0.03615400 | -2.80599400 |
| O | 0.16019300  | -0.61712500 | -4.14120100 |
| O | 1.27811900  | 0.05821300  | -1.98124500 |
| C | -0.37366800 | 1.75981400  | -3.10284700 |
| F | -1.58254800 | 1.86818300  | -3.65465100 |
| F | 0.53369200  | 2.31349900  | -3.91247200 |
| F | -0.36995500 | 2.43011000  | -1.93590800 |
| C | -0.79352300 | -0.29643400 | 3.95434600  |
| C | -0.16559900 | 1.13054900  | 3.85234000  |
| H | -0.53246900 | 1.70961500  | 4.71410800  |
| H | -0.58565500 | 1.62029700  | 2.97710100  |
| C | 1.92833300  | 2.21185000  | 2.83448300  |
| C | 1.35904700  | 2.35873100  | 1.55191900  |
| C | 3.14393300  | 2.88185000  | 3.10375700  |
| C | 2.01401200  | 3.07997600  | 0.56041400  |
| H | 0.43448100  | 1.86590100  | 1.28886200  |
| C | 3.77744600  | 3.63180200  | 2.12086600  |

|   |             |             |             |
|---|-------------|-------------|-------------|
| H | 3.58074300  | 2.83421000  | 4.09551900  |
| C | 3.22633800  | 3.71250800  | 0.83799500  |
| H | 1.57075700  | 3.12532800  | -0.42830300 |
| H | 4.71760000  | 4.12570800  | 2.34100700  |
| H | 3.74821200  | 4.26234800  | 0.06099100  |
| C | 1.32809200  | 1.31929100  | 3.83129200  |
| C | 0.02022000  | -1.35484700 | 3.16154200  |
| H | 0.76443200  | -1.83451100 | 3.79363100  |
| H | -0.66441800 | -2.13347500 | 2.81810300  |
| N | 0.70663600  | -0.81510300 | 1.99963900  |
| C | 1.99151800  | -0.97226700 | 1.68023300  |
| N | 2.34787600  | -0.62207400 | 0.43256500  |
| C | 3.66093200  | -0.36612400 | -0.03407500 |
| C | 4.52736900  | 0.48091400  | 0.65828300  |
| C | 4.03926900  | -0.90656000 | -1.25904000 |
| C | 5.78631600  | 0.75232900  | 0.13113400  |
| C | 5.31254300  | -0.64421000 | -1.76382300 |
| H | 3.34301100  | -1.52414700 | -1.80839300 |
| C | 6.19699900  | 0.18234600  | -1.07675000 |
| H | 7.18366000  | 0.38471100  | -1.47385800 |
| C | 5.71538800  | -1.32873400 | -3.04030400 |
| C | 6.67126300  | 1.74538300  | 0.82865800  |
| F | 4.79018500  | -1.16903600 | -4.00807900 |
| F | 6.89373900  | -0.87602800 | -3.51646900 |
| F | 5.84831700  | -2.66870500 | -2.85275500 |
| F | 7.98009600  | 1.50754400  | 0.60265100  |
| F | 6.42653800  | 3.01383700  | 0.40589800  |
| F | 6.47999900  | 1.74494700  | 2.16750300  |
| S | 3.16143500  | -1.55518600 | 2.82761700  |
| H | 4.21560600  | 0.93245700  | 1.58848900  |
| H | 1.62490600  | -0.45703500 | -0.28133400 |
| H | 0.10179700  | -0.34225900 | 1.30528900  |
| C | 2.15972500  | 0.61413300  | 4.70540500  |
| H | 1.71511500  | 0.13386500  | 5.57188700  |
| H | 2.54436100  | -0.42282900 | 3.93779600  |
| H | 3.17259900  | 0.98093400  | 4.86447400  |
| C | -2.21943600 | -0.17981500 | 3.37649900  |
| H | -2.80814400 | 0.55375200  | 3.94007200  |
| H | -2.73649100 | -1.14376600 | 3.43593200  |
| H | -2.20207200 | 0.12930400  | 2.33141800  |
| C | -0.91601700 | -0.80464800 | 5.40211400  |
| H | -1.39277900 | -1.79177200 | 5.40895400  |
| H | -1.53768300 | -0.12956300 | 6.00080500  |
| H | 0.05148700  | -0.91130000 | 5.90092800  |

TS-EF-1R-1-B3LYP-D3 (BJ)

1 imaginary frequencies

H = -5199.185576

G = -5199.367288

E(M06-2X-DCM) = -5199.569618

|   |             |             |             |
|---|-------------|-------------|-------------|
| O | -2.93907500 | 0.87467000  | 0.06243000  |
| O | -2.16034100 | -1.56047000 | -0.00574600 |
| P | -1.59190600 | -0.04027300 | -0.09819500 |
| O | -0.63523500 | 0.15583900  | 1.02632100  |
| C | -5.17203200 | 0.38936000  | 3.56551800  |
| C | -5.42745300 | -0.39144300 | 2.44306600  |
| C | -4.70571600 | -0.19310500 | 1.25768800  |
| C | -3.36145800 | 1.51241900  | 2.36555000  |
| C | -4.15204000 | 1.33932500  | 3.51336500  |
| C | -3.02264800 | -2.00447700 | -1.00835700 |
| C | -4.37367600 | -1.67653100 | -0.95758300 |
| C | -5.18111200 | -1.95475100 | -2.07143600 |
| C | -4.67386500 | -2.66117700 | -3.15653300 |
| C | -3.34252300 | -3.07575000 | -3.13561300 |
| C | -2.48118000 | -2.73339200 | -2.08038500 |
| H | -3.92103400 | 1.93656100  | 4.38998800  |
| H | -2.93623500 | -3.64032600 | -3.96855200 |
| C | -5.23591500 | -1.09722000 | 0.15765200  |
| C | -5.85582100 | -2.24635000 | 1.02144000  |
| H | -5.05490800 | -2.93893200 | 1.30295300  |
| H | -6.61462100 | -2.81420200 | 0.47596400  |
| H | -7.30426400 | -2.13484600 | -1.66064400 |
| H | -6.91030700 | -0.83677000 | -2.78369000 |
| C | -3.67882300 | 0.74196300  | 1.23352800  |
| H | -5.73807400 | 0.24624300  | 4.48194300  |
| H | -5.30175000 | -2.88596900 | -4.01448500 |
| C | -6.39717900 | -1.53974200 | 2.28126600  |
| H | -6.42492200 | -2.19519800 | 3.15823700  |
| H | -7.42151200 | -1.17501000 | 2.12289500  |
| C | -6.56000500 | -1.35919300 | -1.88691800 |
| C | -6.35542100 | -0.41140900 | -0.68485700 |
| H | -5.98219300 | 0.55779300  | -1.03387500 |
| H | -7.26614500 | -0.23658700 | -0.10441200 |
| C | -1.04690900 | -3.13049900 | -2.14235300 |
| C | -0.27183700 | -2.72803600 | -3.25736200 |
| C | -0.47406900 | -3.94976500 | -1.13927200 |
| C | -0.72709900 | -1.75658400 | -4.20404100 |
| C | 1.05381900  | -3.27125600 | -3.43879800 |

|   |             |             |             |
|---|-------------|-------------|-------------|
| C | 0.89089200  | -4.40091700 | -1.28415500 |
| C | 0.04259800  | -1.39612300 | -5.27741000 |
| H | -1.67220200 | -1.26048600 | -4.02784600 |
| C | 1.80320300  | -2.90750200 | -4.60024900 |
| C | 1.59601100  | -4.09541300 | -2.45001200 |
| C | 1.31329400  | -1.99762300 | -5.49682000 |
| H | -0.30928900 | -0.62357500 | -5.95389200 |
| H | 2.78793600  | -3.34776300 | -4.73595100 |
| H | 2.59716300  | -4.50059000 | -2.58173700 |
| H | 1.90238900  | -1.71033100 | -6.36315500 |
| C | -2.18098600 | 2.42040900  | 2.40911500  |
| C | -1.12234800 | 2.11672900  | 3.29910500  |
| C | -2.10573700 | 3.55554800  | 1.57335600  |
| C | -1.09120700 | 0.92604000  | 4.09245300  |
| C | 0.01625200  | 2.99913300  | 3.37712800  |
| C | -0.96904700 | 4.44020100  | 1.67407200  |
| C | -0.02877000 | 0.63866800  | 4.90909800  |
| H | -1.90779600 | 0.22029500  | 4.00839300  |
| C | 1.10468600  | 2.66598100  | 4.24158800  |
| C | 0.04807300  | 4.14922600  | 2.58532800  |
| C | 1.08736000  | 1.51882300  | 4.98689800  |
| H | -0.01359100 | -0.29332900 | 5.46553400  |
| H | 1.95911600  | 3.33665700  | 4.27461500  |
| H | 0.89497500  | 4.82563700  | 2.67502500  |
| H | 1.92854000  | 1.26663200  | 5.62572000  |
| C | -0.57369800 | -5.10400000 | 1.01021400  |
| H | -1.12724100 | -5.37979400 | 1.90215400  |
| C | -1.18392300 | -4.36822200 | 0.02988400  |
| H | -2.22191800 | -4.08344500 | 0.14412400  |
| C | 0.78716100  | -5.50096100 | 0.88315000  |
| H | 1.25551800  | -6.06799000 | 1.68123500  |
| C | 1.49313800  | -5.16692100 | -0.23928500 |
| H | 2.53474900  | -5.45546900 | -0.35125300 |
| C | -3.00687800 | 4.97335700  | -0.19560800 |
| H | -3.77954500 | 5.18126900  | -0.92966200 |
| C | -1.88770100 | 5.84564800  | -0.08990600 |
| H | -1.82126400 | 6.71606700  | -0.73649900 |
| C | -0.90850200 | 5.59169800  | 0.83084200  |
| H | -0.06104200 | 6.26476500  | 0.93839000  |
| C | -3.12001100 | 3.88044000  | 0.62070600  |
| H | -3.98505600 | 3.23433800  | 0.53921100  |
| N | -1.12619100 | 0.17043700  | -1.63528900 |
| S | -0.62494200 | 1.55572700  | -2.18188600 |
| O | 0.34349500  | 1.40105400  | -3.27653300 |

|   |             |             |             |
|---|-------------|-------------|-------------|
| O | -0.27101900 | 2.54499800  | -1.12272900 |
| C | -2.10112900 | 2.31235500  | -3.03762900 |
| F | -2.45330500 | 1.53579700  | -4.07131100 |
| F | -1.76701000 | 3.52469500  | -3.49845100 |
| F | -3.14702600 | 2.43471900  | -2.21874900 |
| C | 2.92591600  | 4.75582500  | -1.21775200 |
| C | 3.60260700  | 3.67790800  | -2.12891100 |
| H | 4.17779400  | 4.22067000  | -2.89432800 |
| H | 2.82093800  | 3.15398600  | -2.67819600 |
| C | 4.37652500  | 1.25394700  | -1.84546200 |
| C | 3.09200100  | 0.74183400  | -2.11949200 |
| C | 5.45920200  | 0.34588400  | -1.78804300 |
| C | 2.88107400  | -0.61990700 | -2.27917500 |
| H | 2.23465600  | 1.39359000  | -2.17417900 |
| C | 5.25103400  | -1.01362300 | -1.97752200 |
| H | 6.46817200  | 0.71122200  | -1.62974900 |
| C | 3.95977400  | -1.50123200 | -2.20478500 |
| H | 1.87517500  | -0.98032100 | -2.45560400 |
| H | 6.08850300  | -1.70061900 | -1.92372200 |
| H | 3.79329400  | -2.56576000 | -2.30698300 |
| C | 4.55255300  | 2.66900700  | -1.53995000 |
| C | 2.63229900  | 4.24363600  | 0.21717100  |
| H | 3.51118500  | 4.33686900  | 0.85326600  |
| H | 1.85294300  | 4.88117300  | 0.64426300  |
| N | 2.17905700  | 2.86282400  | 0.29254800  |
| C | 2.68004400  | 1.89721100  | 1.07945100  |
| N | 1.94322800  | 0.78282900  | 1.19357000  |
| C | 2.34952000  | -0.49439700 | 1.65493600  |
| C | 3.51932900  | -1.11008000 | 1.20423200  |
| C | 1.46658000  | -1.19118700 | 2.48007400  |
| C | 3.79518700  | -2.41947400 | 1.59580400  |
| C | 1.76129500  | -2.49612500 | 2.86573600  |
| H | 0.54699500  | -0.71968400 | 2.79161300  |
| C | 2.92485200  | -3.12204100 | 2.43097100  |
| H | 3.14652400  | -4.13960400 | 2.72403200  |
| C | 0.81124100  | -3.18733100 | 3.80227100  |
| C | 4.99224500  | -3.12863500 | 1.03312000  |
| F | 0.92980500  | -2.70781100 | 5.06881200  |
| F | -0.47484900 | -3.00400900 | 3.44192300  |
| F | 1.03260500  | -4.52003500 | 3.87096800  |
| F | 6.01145000  | -2.28292600 | 0.76294700  |
| F | 5.46213100  | -4.07663700 | 1.87133500  |
| F | 4.69768800  | -3.76361900 | -0.13634500 |
| S | 4.19077500  | 2.06524400  | 1.92112800  |



|   |            |             |             |
|---|------------|-------------|-------------|
| H | 4.19271700 | -0.58339900 | 0.54336800  |
| H | 0.92952300 | 0.81096500  | 0.97127500  |
| H | 1.28463100 | 2.66157600  | -0.17685900 |
| C | 5.53693000 | 3.05095200  | -0.62239600 |
| H | 5.78427600 | 4.10430000  | -0.53064600 |
| H | 4.93001400 | 2.73278700  | 0.51790800  |
| H | 6.37789200 | 2.37865200  | -0.45853300 |
| C | 1.61174200 | 5.15646200  | -1.91828500 |
| H | 1.81271200 | 5.48131800  | -2.94575700 |
| H | 1.13510500 | 5.98850500  | -1.38943200 |
| H | 0.89522900 | 4.33271100  | -1.95136600 |
| C | 3.78899600 | 6.02347800  | -1.07499600 |
| H | 3.27307500 | 6.76403000  | -0.45271500 |
| H | 3.96472700 | 6.48127300  | -2.05444200 |
| H | 4.76073100 | 5.82931200  | -0.61138000 |

TS-EF-1R-2-B3LYP-D3 (BJ)

1 imaginary frequencies

H = -5199.189295

G = -5199.370294

E(M06-2X-DCM) = -5199.570313

|   |             |             |             |
|---|-------------|-------------|-------------|
| O | -2.67683500 | 0.29560400  | -1.19340800 |
| O | -2.41513000 | -0.97900700 | 1.02493900  |
| P | -1.59406900 | -0.04701900 | -0.03799900 |
| O | -1.14093700 | 1.13626600  | 0.76214600  |
| C | -6.23016600 | 2.20622500  | -0.11145200 |
| C | -6.12602400 | 0.82020800  | -0.05501800 |
| C | -4.94947600 | 0.17511800  | -0.46419700 |
| C | -3.92607500 | 2.34605900  | -0.91348900 |
| C | -5.13967600 | 2.95470100  | -0.55680400 |
| C | -2.86086300 | -2.23196500 | 0.60370300  |
| C | -4.02611300 | -2.33396400 | -0.14735600 |
| C | -4.35063100 | -3.56795300 | -0.73236900 |
| C | -3.60045700 | -4.70394800 | -0.45179800 |
| C | -2.49986200 | -4.59911900 | 0.39838400  |
| C | -2.08389500 | -3.36098100 | 0.91331200  |
| H | -5.20729000 | 4.03683600  | -0.60873600 |
| H | -1.91403700 | -5.48032400 | 0.63866300  |
| C | -5.13669500 | -1.33256900 | -0.43926300 |
| C | -6.27030000 | -1.45136000 | 0.63374700  |
| H | -5.80955700 | -1.42525700 | 1.62764800  |
| H | -6.82816800 | -2.38769100 | 0.54761300  |
| H | -6.44425200 | -3.84601700 | -1.23797300 |
| H | -5.36294600 | -3.91643200 | -2.62689000 |

|   |             |             |             |
|---|-------------|-------------|-------------|
| C | -3.86309100 | 0.94387200  | -0.85635800 |
| H | -7.14575300 | 2.70552700  | 0.19387600  |
| H | -3.85907700 | -5.66263200 | -0.89294200 |
| C | -7.13804400 | -0.19269600 | 0.43003000  |
| H | -7.64917300 | 0.12483500  | 1.34523600  |
| H | -7.91637100 | -0.36550900 | -0.32595900 |
| C | -5.53000900 | -3.41482900 | -1.66771400 |
| C | -5.64251600 | -1.88105400 | -1.81000700 |
| H | -4.95902600 | -1.53312300 | -2.59187200 |
| H | -6.65090000 | -1.53390900 | -2.05348600 |
| C | -0.85449100 | -3.28204600 | 1.75212300  |
| C | 0.37472100  | -3.75018200 | 1.22783200  |
| C | -0.93009900 | -2.84346200 | 3.09764700  |
| C | 0.52575900  | -4.17513000 | -0.13107400 |
| C | 1.54030400  | -3.80839600 | 2.07981400  |
| C | 0.25185400  | -2.87964400 | 3.92761800  |
| C | 1.70399300  | -4.70949900 | -0.58055700 |
| H | -0.29936500 | -4.04123200 | -0.81675300 |
| C | 2.75674800  | -4.35513200 | 1.56551400  |
| C | 1.45378500  | -3.35410000 | 3.39702800  |
| C | 2.83183600  | -4.82280500 | 0.28247500  |
| H | 1.79984800  | -4.99976300 | -1.62131000 |
| H | 3.62091700  | -4.39169900 | 2.22347300  |
| H | 2.33601900  | -3.39146600 | 4.03093600  |
| H | 3.76303800  | -5.22179100 | -0.10500400 |
| C | -2.74544100 | 3.15997500  | -1.31279200 |
| C | -2.17605000 | 4.06727500  | -0.38832200 |
| C | -2.19860700 | 3.02222300  | -2.60860700 |
| C | -2.66591500 | 4.23183800  | 0.94600900  |
| C | -1.03433900 | 4.85777100  | -0.78195400 |
| C | -1.03615100 | 3.79448200  | -2.97558800 |
| C | -2.10988600 | 5.14572400  | 1.80225400  |
| H | -3.48784200 | 3.61169800  | 1.28109500  |
| C | -0.46548600 | 5.77849900  | 0.15035200  |
| C | -0.49299100 | 4.69558500  | -2.05853700 |
| C | -0.99491200 | 5.93522700  | 1.40247300  |
| H | -2.51122100 | 5.25648300  | 2.80599100  |
| H | 0.40116800  | 6.35451400  | -0.16357000 |
| H | 0.38391900  | 5.27420300  | -2.33844500 |
| H | -0.56147400 | 6.64922100  | 2.09755300  |
| C | -2.19266600 | -2.00883600 | 5.01778100  |
| H | -3.13388700 | -1.68010600 | 5.44928800  |
| C | -2.14689800 | -2.39763100 | 3.70381000  |
| H | -3.05220100 | -2.38224500 | 3.11014800  |

|   |             |             |             |
|---|-------------|-------------|-------------|
| C | -1.02333200 | -2.04432400 | 5.82936100  |
| H | -1.07924300 | -1.73818400 | 6.87019200  |
| C | 0.16284700  | -2.46785700 | 5.29349100  |
| H | 1.06605100  | -2.50272000 | 5.89715000  |
| C | -2.17950800 | 2.01187900  | -4.82677700 |
| H | -2.61149600 | 1.32581000  | -5.54929500 |
| C | -1.01092800 | 2.74657100  | -5.17076200 |
| H | -0.56065000 | 2.61222600  | -6.14990000 |
| C | -0.46345800 | 3.61940900  | -4.27206900 |
| H | 0.42203200  | 4.19736700  | -4.52459000 |
| C | -2.75583800 | 2.15054800  | -3.59406500 |
| H | -3.64591200 | 1.58398600  | -3.34990900 |
| N | -0.46584600 | -0.96958000 | -0.73316900 |
| S | -0.03193400 | -0.89846000 | -2.27667300 |
| O | 1.14274400  | -1.75620100 | -2.45989600 |
| O | -0.01934700 | 0.45807000  | -2.84089300 |
| C | -1.37090800 | -1.82587700 | -3.22502600 |
| F | -1.79903400 | -2.88031900 | -2.51164900 |
| F | -0.84548500 | -2.26766300 | -4.37092400 |
| F | -2.42717600 | -1.05728000 | -3.51445600 |
| C | -0.14186400 | 2.05875500  | 4.04340800  |
| C | 0.41949000  | 3.08873000  | 3.01312200  |
| H | 0.21400200  | 4.09588300  | 3.40524400  |
| H | -0.17779800 | 3.02270700  | 2.10542300  |
| C | 2.26049900  | 3.27243100  | 1.23385800  |
| C | 1.48002800  | 2.73721400  | 0.18824800  |
| C | 3.47632200  | 3.91161300  | 0.89940300  |
| C | 1.93750900  | 2.75863600  | -1.12612900 |
| H | 0.53646000  | 2.24927000  | 0.39173900  |
| C | 3.90480800  | 3.97782800  | -0.42001700 |
| H | 4.07104200  | 4.38210300  | 1.67518500  |
| C | 3.15115500  | 3.37522700  | -1.43226900 |
| H | 1.34543800  | 2.27760700  | -1.89803100 |
| H | 4.84464100  | 4.46427200  | -0.65751700 |
| H | 3.51729100  | 3.38102200  | -2.45410800 |
| C | 1.87846400  | 3.08648200  | 2.63904200  |
| C | 0.48270700  | 0.64704400  | 3.86314100  |
| H | 1.35880200  | 0.51509000  | 4.49521800  |
| H | -0.25256600 | -0.10046500 | 4.16790800  |
| N | 0.87730900  | 0.36051000  | 2.49144800  |
| C | 2.05661300  | -0.09342500 | 2.06914200  |
| N | 2.12846300  | -0.52406900 | 0.79353000  |
| C | 3.31132700  | -0.61866300 | 0.01248700  |
| C | 4.25569600  | 0.41033700  | -0.00291800 |

|   |             |             |             |
|---|-------------|-------------|-------------|
| C | 3.47611500  | -1.73233800 | -0.80424800 |
| C | 5.38206700  | 0.29359500  | -0.81231000 |
| C | 4.60094600  | -1.82823800 | -1.62244700 |
| H | 2.72080800  | -2.50089900 | -0.81615400 |
| C | 5.56564600  | -0.82543200 | -1.62679000 |
| H | 6.44200100  | -0.90779100 | -2.25773500 |
| C | 4.79738500  | -3.06607500 | -2.45277300 |
| C | 6.37809900  | 1.41584500  | -0.87410500 |
| F | 3.63465400  | -3.54695500 | -2.93202500 |
| F | 5.61693900  | -2.84406600 | -3.50320400 |
| F | 5.36327300  | -4.06567000 | -1.72343100 |
| F | 6.39366600  | 2.14919300  | 0.26185900  |
| F | 7.63353500  | 0.96229700  | -1.08138500 |
| F | 6.10804900  | 2.27701500  | -1.88967100 |
| S | 3.45274800  | -0.09489700 | 3.10693200  |
| H | 4.11246200  | 1.29239400  | 0.60319400  |
| H | 1.24715900  | -0.75617700 | 0.30943800  |
| H | 0.13563000  | 0.51689600  | 1.78985100  |
| C | 2.88307000  | 2.86032300  | 3.58185200  |
| H | 2.64535600  | 2.95578800  | 4.63649300  |
| H | 3.10428400  | 1.51900900  | 3.45659400  |
| H | 3.90384900  | 3.13558800  | 3.32074100  |
| C | -1.66606000 | 1.98019600  | 3.81173600  |
| H | -2.12337100 | 2.96749400  | 3.93857100  |
| H | -2.12092700 | 1.29673100  | 4.53765200  |
| H | -1.89881400 | 1.62540500  | 2.80591700  |
| C | 0.07730700  | 2.47959400  | 5.50843000  |
| H | -0.38180400 | 1.74354300  | 6.17884100  |
| H | -0.39505400 | 3.44815900  | 5.70623500  |
| H | 1.13250400  | 2.55285300  | 5.78513200  |

TS-EF-1S-M06-2X-DCM

l imaginary frequencies

H = -5197.135089

G = -5197.313067

E(M06-2X-DCM) = -5199.579491

|   |            |             |             |
|---|------------|-------------|-------------|
| O | 2.46757000 | -1.50172000 | -0.42952500 |
| O | 2.63024100 | 1.01013400  | -0.00943100 |
| P | 1.55156000 | -0.19713700 | -0.13753800 |
| O | 0.86176500 | -0.27884800 | 1.18136900  |
| C | 5.28592500 | -2.61777600 | 2.43346400  |
| C | 5.60146700 | -1.69795200 | 1.44210700  |
| C | 4.66538800 | -1.36867800 | 0.45888200  |
| C | 3.01712100 | -2.78903800 | 1.54488100  |

|   |              |              |              |
|---|--------------|--------------|--------------|
| C | 4. 00603500  | -3. 16684000 | 2. 46295200  |
| C | 3. 39835200  | 1. 30227300  | -1. 12920200 |
| C | 4. 53453300  | 0. 55227500  | -1. 41016200 |
| C | 5. 19199200  | 0. 75301700  | -2. 62978200 |
| C | 4. 79200500  | 1. 75801200  | -3. 49861600 |
| C | 3. 71151100  | 2. 56186800  | -3. 14851800 |
| C | 2. 98185600  | 2. 33864400  | -1. 97459300 |
| H | 3. 73883000  | -3. 87876700 | 3. 23885700  |
| H | 3. 38924300  | 3. 36131600  | -3. 80931800 |
| C | 5. 29903500  | -0. 47848000 | -0. 59182300 |
| C | 6. 41670500  | 0. 19251200  | 0. 25927300  |
| H | 5. 97362800  | 1. 02165200  | 0. 82261900  |
| H | 7. 22474600  | 0. 59560000  | -0. 35828100 |
| H | 7. 27714800  | 0. 17021900  | -2. 64496500 |
| H | 6. 29201800  | -0. 69387800 | -3. 82391300 |
| C | 3. 38370700  | -1. 89126200 | 0. 53210500  |
| H | 6. 01754200  | -2. 89639200 | 3. 18653300  |
| H | 5. 30759800  | 1. 91320800  | -4. 44190100 |
| C | 6. 87420800  | -0. 90938500 | 1. 23379200  |
| H | 7. 27626800  | -0. 50905700 | 2. 16912900  |
| H | 7. 65742500  | -1. 53547000 | 0. 78809300  |
| C | 6. 28740300  | -0. 27218600 | -2. 81464400 |
| C | 5. 94409200  | -1. 31224300 | -1. 73371900 |
| H | 5. 19206800  | -2. 01063000 | -2. 11798900 |
| H | 6. 80634300  | -1. 89115100 | -1. 38933800 |
| C | 1. 80744900  | 3. 20971800  | -1. 67947900 |
| C | 0. 75030900  | 3. 27144800  | -2. 61151000 |
| C | 1. 79959000  | 4. 05438300  | -0. 54755600 |
| C | 0. 62083000  | 2. 32756200  | -3. 68407800 |
| C | -0. 26909300 | 4. 27201400  | -2. 46861700 |
| C | 0. 73721300  | 5. 00991400  | -0. 38430700 |
| C | -0. 42202500 | 2. 39707900  | -4. 55906100 |
| H | 1. 33346800  | 1. 51413500  | -3. 75124000 |
| C | -1. 31524400 | 4. 34607500  | -3. 44255900 |
| C | -0. 25404300 | 5. 11540700  | -1. 36010800 |
| C | -1. 39232500 | 3. 43868900  | -4. 45574600 |
| H | -0. 52746700 | 1. 63975000  | -5. 32903300 |
| H | -2. 06621700 | 5. 12425600  | -3. 32968800 |
| H | -1. 04125800 | 5. 85791000  | -1. 24344300 |
| H | -2. 20286600 | 3. 48874000  | -5. 17656000 |
| C | 1. 61599100  | -3. 27578100 | 1. 68955600  |
| C | 0. 90272800  | -2. 96634400 | 2. 87099000  |
| C | 0. 99879700  | -4. 01162600 | 0. 66026900  |
| C | 1. 46510400  | -2. 20572900 | 3. 94950300  |

|   |             |             |             |
|---|-------------|-------------|-------------|
| C | -0.45476800 | -3.41111700 | 3.01512300  |
| C | -0.36602500 | -4.43497200 | 0.81039400  |
| C | 0.76433800  | -1.98253600 | 5.09971500  |
| H | 2.47071200  | -1.81372900 | 3.84974200  |
| C | -1.17604800 | -3.10305600 | 4.21248200  |
| C | -1.05592300 | -4.13075200 | 1.98150500  |
| C | -0.58355700 | -2.42640700 | 5.23625400  |
| H | 1.23265800  | -1.43842300 | 5.91621200  |
| H | -2.20921800 | -3.43263400 | 4.28741800  |
| H | -2.08987300 | -4.45446500 | 2.09091900  |
| H | -1.13551300 | -2.21105900 | 6.14608900  |
| C | 2.80426800  | 4.87922600  | 1.51857200  |
| H | 3.60687900  | 4.85021100  | 2.24974200  |
| C | 2.83366000  | 4.03504500  | 0.44596300  |
| H | 3.65935600  | 3.34148300  | 0.33110000  |
| C | 1.74061700  | 5.81549600  | 1.68199800  |
| H | 1.74045000  | 6.48593400  | 2.53678600  |
| C | 0.73891800  | 5.87162700  | 0.75889600  |
| H | -0.07399500 | 6.58668000  | 0.86029700  |
| C | 1.01719900  | -4.99716600 | -1.56513400 |
| H | 1.53842900  | -5.21547100 | -2.49218800 |
| C | -0.34977600 | -5.37769800 | -1.42643200 |
| H | -0.85917000 | -5.86525900 | -2.25148300 |
| C | -1.01151600 | -5.12409400 | -0.26514500 |
| H | -2.05374000 | -5.40883600 | -0.14503700 |
| C | 1.66990300  | -4.35103000 | -0.55865100 |
| H | 2.71003300  | -4.06939200 | -0.68307300 |
| C | 0.33533900  | 2.24823100  | 4.11237200  |
| C | -0.17925400 | 3.08765900  | 2.90586100  |
| H | 0.12809300  | 4.13389400  | 3.06254300  |
| H | 0.35537100  | 2.78514100  | 2.00048000  |
| C | -2.11560400 | 3.06256100  | 1.23730500  |
| C | -1.42464700 | 2.27873700  | 0.28929400  |
| C | -3.31641900 | 3.69254100  | 0.84681300  |
| C | -1.93907700 | 2.10657700  | -0.98689700 |
| H | -0.52026700 | 1.74246500  | 0.56512100  |
| C | -3.82252400 | 3.52141600  | -0.43305000 |
| H | -3.83477400 | 4.34837100  | 1.53850000  |
| C | -3.14166100 | 2.71479900  | -1.34421500 |
| H | -1.41048200 | 1.49064600  | -1.70500800 |
| H | -4.75438600 | 4.00002200  | -0.71577600 |
| H | -3.54174400 | 2.55617500  | -2.33970200 |
| C | -1.64916100 | 3.15510400  | 2.61495400  |
| C | -0.54630800 | 1.00971800  | 4.38126200  |

|   |             |             |             |
|---|-------------|-------------|-------------|
| H | -1.46445100 | 1.26125800  | 4.91032300  |
| H | 0.01614500  | 0.32436000  | 5.02285100  |
| N | -0.88290300 | 0.32444200  | 3.14833600  |
| C | -2.08178800 | -0.06699200 | 2.71793600  |
| N | -2.08597700 | -0.75871500 | 1.55682900  |
| C | -3.17744600 | -0.95920600 | 0.67195100  |
| C | -4.13634500 | 0.02944500  | 0.43607900  |
| C | -3.20998700 | -2.14056600 | -0.05991600 |
| C | -5.12757000 | -0.19483100 | -0.50813400 |
| C | -4.18465600 | -2.32297700 | -1.03589500 |
| H | -2.44286300 | -2.89107500 | 0.09161400  |
| C | -5.16061300 | -1.36626300 | -1.26270000 |
| H | -5.92822300 | -1.52229400 | -2.01240400 |
| C | -4.13404800 | -3.59161100 | -1.83778200 |
| C | -6.15916600 | 0.86290200  | -0.77651300 |
| F | -2.95784300 | -3.73549000 | -2.45755700 |
| F | -5.09734700 | -3.63953800 | -2.76732500 |
| F | -4.28960600 | -4.67370700 | -1.04895000 |
| F | -7.37415200 | 0.32604700  | -0.96010900 |
| F | -5.88416200 | 1.56744100  | -1.89079400 |
| F | -6.25406800 | 1.74684900  | 0.22737700  |
| S | -3.52917300 | 0.29640500  | 3.58902800  |
| H | -4.10568200 | 0.96740500  | 0.97696100  |
| H | -1.17305100 | -1.04999600 | 1.18640500  |
| H | -0.09172400 | 0.08497000  | 2.53423300  |
| C | -2.59936600 | 3.23368400  | 3.64329300  |
| H | -2.26375900 | 3.48805700  | 4.64421800  |
| H | -2.95363400 | 1.98773700  | 3.69459300  |
| H | -3.59378000 | 3.60050900  | 3.39247100  |
| N | 0.71407600  | 0.06909500  | -1.48634200 |
| S | -0.30012700 | -1.04415900 | -1.98690600 |
| O | -1.45377200 | -0.46755600 | -2.66354800 |
| O | -0.53092000 | -2.08737100 | -0.98314900 |
| C | 0.60749500  | -1.88201000 | -3.35437500 |
| F | 0.75177800  | -1.03657000 | -4.37550500 |
| F | -0.09135900 | -2.93525700 | -3.76381600 |
| F | 1.81249000  | -2.28511000 | -2.96994100 |
| C | 1.75980500  | 1.79381300  | 3.75109400  |
| H | 2.38248500  | 2.66393400  | 3.51477600  |
| H | 2.21501400  | 1.26186700  | 4.59439200  |
| H | 1.77186800  | 1.13520800  | 2.87552500  |
| C | 0.41459100  | 3.06841600  | 5.40653700  |
| H | 0.78872900  | 2.44485800  | 6.22607500  |
| H | 1.10901500  | 3.90582500  | 5.28218100  |

H                    -0.55200200      3.47476200      5.71772900

TS-EF-1S-1-M06-2X-DCM

1 imaginary frequencies

H = -5197.128685

G = -5197.30906

E(M06-2X-DCM) = -5199.576558

|   |            |             |             |
|---|------------|-------------|-------------|
| O | 1.97341400 | -2.25655100 | -0.33553600 |
| O | 2.87734900 | 0.12658900  | -0.00123700 |
| P | 1.50288300 | -0.70125300 | -0.28706100 |
| O | 0.60333800 | -0.42935600 | 0.87314800  |
| C | 4.03671900 | -3.65272800 | 3.00793800  |
| C | 4.71277400 | -3.06152300 | 1.94856000  |
| C | 4.01971600 | -2.63245800 | 0.81406200  |
| C | 1.92679200 | -3.35857800 | 1.81813200  |
| C | 2.65472000 | -3.81026200 | 2.92566000  |
| C | 3.81992800 | 0.12696400  | -1.02009800 |
| C | 4.64664700 | -0.97259700 | -1.18440500 |
| C | 5.42133700 | -1.07386500 | -2.34395900 |
| C | 5.44969000 | -0.03578300 | -3.26555300 |
| C | 4.72422100 | 1.12678800  | -3.00102100 |
| C | 3.89651900 | 1.23058300  | -1.87954800 |
| H | 2.11009800 | -4.28262200 | 3.73845200  |
| H | 4.78299800 | 1.97367300  | -3.67883600 |
| C | 4.98157600 | -2.11182000 | -0.23757500 |
| C | 6.18757200 | -1.71618200 | 0.66746300  |
| H | 5.99508200 | -0.71983400 | 1.08221400  |
| H | 7.12802400 | -1.67616700 | 0.10963700  |
| H | 7.19834700 | -2.29690100 | -2.16997900 |
| H | 6.04133700 | -2.90051200 | -3.35377100 |
| C | 2.63880100 | -2.75311700 | 0.77410200  |
| H | 4.57357500 | -3.98778500 | 3.89079100  |
| H | 6.04408200 | -0.11357200 | -4.17123500 |
| C | 6.18498300 | -2.75257300 | 1.80526800  |
| H | 6.62912300 | -2.37115100 | 2.72932900  |
| H | 6.74555500 | -3.65334600 | 1.52423900  |
| C | 6.12733200 | -2.41236400 | -2.37868700 |
| C | 5.41748600 | -3.19948900 | -1.25674700 |
| H | 4.51847900 | -3.68303500 | -1.65451800 |
| H | 6.04686200 | -3.96870700 | -0.79837900 |
| C | 3.23875300 | 2.52811100  | -1.53312700 |
| C | 2.15704100 | 3.03588400  | -2.27919700 |
| C | 3.80406200 | 3.29698700  | -0.48998900 |
| C | 1.55338400 | 2.30216600  | -3.35086100 |



|   |              |              |              |
|---|--------------|--------------|--------------|
| C | 1. 63153700  | 4. 34165700  | -1. 97367500 |
| C | 3. 25229800  | 4. 58634300  | -0. 17708100 |
| C | 0. 53406000  | 2. 84044600  | -4. 08052400 |
| H | 1. 89434800  | 1. 29294200  | -3. 55293900 |
| C | 0. 56248000  | 4. 86860700  | -2. 76502000 |
| C | 2. 18216900  | 5. 07688400  | -0. 92569100 |
| C | 0. 03983500  | 4. 14748100  | -3. 79521600 |
| H | 0. 07338300  | 2. 24711500  | -4. 86259300 |
| H | 0. 17961200  | 5. 85625500  | -2. 52028200 |
| H | 1. 78043900  | 6. 06349600  | -0. 69914600 |
| H | -0. 77350600 | 4. 55334300  | -4. 38963600 |
| C | 0. 45065500  | -3. 56617100 | 1. 75123000  |
| C | -0. 40492800 | -2. 89133000 | 2. 64738900  |
| C | -0. 07686500 | -4. 47432300 | 0. 81216000  |
| C | 0. 06928900  | -1. 92746900 | 3. 59716900  |
| C | -1. 81676800 | -3. 15094100 | 2. 60908600  |
| C | -1. 49484900 | -4. 70272000 | 0. 76521600  |
| C | -0. 78952400 | -1. 30526400 | 4. 45667000  |
| H | 1. 12857400  | -1. 69087800 | 3. 61319600  |
| C | -2. 68563100 | -2. 45792500 | 3. 51043000  |
| C | -2. 32687800 | -4. 05221200 | 1. 67355300  |
| C | -2. 19088600 | -1. 56891300 | 4. 41644300  |
| H | -0. 41008000 | -0. 58855200 | 5. 18008100  |
| H | -3. 75218000 | -2. 65971400 | 3. 45106800  |
| H | -3. 40098600 | -4. 22108400 | 1. 62683700  |
| H | -2. 85523400 | -1. 04520400 | 5. 09606800  |
| C | 5. 47679400  | 3. 63313600  | 1. 25651900  |
| H | 6. 34600300  | 3. 28368100  | 1. 80486200  |
| C | 4. 94812800  | 2. 86459400  | 0. 26007700  |
| H | 5. 40292600  | 1. 91027800  | 0. 01682400  |
| C | 4. 89987200  | 4. 89402000  | 1. 58894900  |
| H | 5. 33074200  | 5. 48916800  | 2. 38831500  |
| C | 3. 82205000  | 5. 35235900  | 0. 88987000  |
| H | 3. 38458300  | 6. 32282400  | 1. 11458600  |
| C | 0. 18956800  | -5. 99276700 | -1. 07229800 |
| H | 0. 82874500  | -6. 50200700 | -1. 78695300 |
| C | -1. 22226300 | -6. 18944400 | -1. 13442700 |
| H | -1. 64003300 | -6. 83553000 | -1. 90002300 |
| C | -2. 03607800 | -5. 57050300 | -0. 23587900 |
| H | -3. 11445000 | -5. 69853000 | -0. 27160300 |
| C | 0. 74231700  | -5. 17389300 | -0. 13336600 |
| H | 1. 81797400  | -5. 03743900 | -0. 10114000 |
| C | 1. 05022000  | 3. 06158100  | 3. 06600200  |
| C | 0. 49116200  | 3. 78247000  | 1. 80033300  |

|   |             |             |             |
|---|-------------|-------------|-------------|
| H | 0.99299800  | 4.76137400  | 1.72493700  |
| H | 0.81382100  | 3.24379200  | 0.90505400  |
| C | -1.67918700 | 3.89491000  | 0.43166600  |
| C | -1.30419900 | 2.89623100  | -0.49182600 |
| C | -2.81566700 | 4.68498100  | 0.14244400  |
| C | -2.04135600 | 2.70338700  | -1.65503400 |
| H | -0.47840800 | 2.21891000  | -0.28432200 |
| C | -3.54881400 | 4.48262200  | -1.01443500 |
| H | -3.09861900 | 5.49285800  | 0.80797400  |
| C | -3.15967300 | 3.49044100  | -1.91531100 |
| H | -1.75218600 | 1.92085400  | -2.34526100 |
| H | -4.42178100 | 5.09427700  | -1.21693100 |
| H | -3.73747900 | 3.32233800  | -2.81793900 |
| C | -0.97535300 | 4.07886700  | 1.69735600  |
| C | 0.03330200  | 2.04905900  | 3.63586100  |
| H | -0.73037100 | 2.51680600  | 4.25715800  |
| H | 0.57667800  | 1.33748100  | 4.27180500  |
| N | -0.60506800 | 1.32566000  | 2.55777300  |
| C | -1.90445300 | 1.07112500  | 2.37350800  |
| N | -2.16572900 | 0.23381500  | 1.35507200  |
| C | -3.38995200 | 0.01950800  | 0.68651800  |
| C | -4.28474600 | 1.05164000  | 0.40570500  |
| C | -3.61120800 | -1.25161000 | 0.16829100  |
| C | -5.41620900 | 0.78009100  | -0.35242800 |
| C | -4.74744500 | -1.50098900 | -0.59092300 |
| H | -2.86852300 | -2.02954900 | 0.31878700  |
| C | -5.66921300 | -0.49592000 | -0.85186900 |
| H | -6.55436500 | -0.69372200 | -1.44607000 |
| C | -4.94183500 | -2.89638500 | -1.11161000 |
| C | -6.33806400 | 1.90544300  | -0.72517100 |
| F | -3.83066900 | -3.36039500 | -1.69584900 |
| F | -5.93924400 | -2.97018500 | -2.00086400 |
| F | -5.23607600 | -3.75791500 | -0.11558200 |
| F | -6.25031500 | 2.93587700  | 0.12795600  |
| F | -7.61784700 | 1.50865900  | -0.75636600 |
| F | -6.05775300 | 2.39246300  | -1.94912800 |
| S | -3.12819500 | 1.78789100  | 3.35392100  |
| H | -4.08995700 | 2.05878600  | 0.75588200  |
| H | -1.35437800 | -0.20586800 | 0.89931900  |
| H | 0.03034700  | 0.78772500  | 1.94955800  |
| C | -1.71239100 | 4.48077400  | 2.82580300  |
| H | -1.16630700 | 4.80130400  | 3.70760500  |
| H | -2.25197200 | 3.36808900  | 3.12376800  |
| H | -2.64982800 | 5.01003300  | 2.66359000  |

|   |             |             |             |
|---|-------------|-------------|-------------|
| N | 1.07857400  | -0.38623000 | -1.79682300 |
| S | -0.38787300 | -0.54157200 | -2.34970700 |
| O | -0.49565200 | 0.00473500  | -3.69379800 |
| O | -1.42485700 | -0.17678700 | -1.37607700 |
| C | -0.64639800 | -2.35488000 | -2.55051300 |
| F | 0.40912600  | -2.93346800 | -3.10579300 |
| F | -1.71388900 | -2.57243800 | -3.30754700 |
| F | -0.85212200 | -2.88817100 | -1.34760800 |
| C | 2.30657900  | 2.30372900  | 2.61296600  |
| H | 3.03034300  | 2.99820400  | 2.17846600  |
| H | 2.78193600  | 1.81190400  | 3.46927500  |
| H | 2.08514300  | 1.54045600  | 1.85882700  |
| C | 1.46868700  | 4.03818800  | 4.17149500  |
| H | 1.85987700  | 3.48412600  | 5.03189700  |
| H | 2.26789900  | 4.69241800  | 3.80658600  |
| H | 0.64914000  | 4.66692500  | 4.53094400  |

TS-EF-1S-2-M06-2X-DCM

1 imaginary frequencies

H = -5197.126935

G = -5197.306524

E(M06-2X-DCM) = -5199.573542

|   |             |             |             |
|---|-------------|-------------|-------------|
| O | 1.05932000  | -2.66996600 | -0.26819600 |
| O | 2.79509500  | -0.91857900 | 0.40856200  |
| P | 1.29192800  | -1.06258800 | -0.20652400 |
| O | 0.35074100  | -0.39396200 | 0.73534900  |
| C | 1.73537600  | -4.89371000 | 3.20059400  |
| C | 2.76094200  | -4.64973800 | 2.29691400  |
| C | 2.52136800  | -3.92783800 | 1.12518300  |
| C | 0.20362500  | -3.62408700 | 1.78696400  |
| C | 0.46697700  | -4.38750200 | 2.93194600  |
| C | 3.83153200  | -1.31121400 | -0.43173600 |
| C | 4.13227000  | -2.65666400 | -0.57943500 |
| C | 4.98814400  | -3.05361600 | -1.61204700 |
| C | 5.62805000  | -2.10901600 | -2.40224700 |
| C | 5.42630100  | -0.75536600 | -2.13501100 |
| C | 4.52251200  | -0.33161700 | -1.15592900 |
| H | -0.34863700 | -4.56169400 | 3.62810200  |
| H | 5.95712900  | -0.00008800 | -2.70758900 |
| C | 3.77472900  | -3.85943700 | 0.27501700  |
| C | 4.86255600  | -4.07048300 | 1.37209200  |
| H | 5.05413600  | -3.10721400 | 1.85883200  |
| H | 5.80655800  | -4.43335900 | 0.95493500  |
| H | 5.99855100  | -4.94599400 | -1.31607200 |

|   |             |             |             |
|---|-------------|-------------|-------------|
| H | 4.93115400  | -4.92659600 | -2.71756600 |
| C | 1.25672600  | -3.40773800 | 0.88874200  |
| H | 1.91857300  | -5.45943300 | 4.10955300  |
| H | 6.28924400  | -2.41443300 | -3.20792800 |
| C | 4.21915100  | -5.03405600 | 2.38346300  |
| H | 4.62544200  | -4.92644700 | 3.39335900  |
| H | 4.36484000  | -6.08011300 | 2.08488200  |
| C | 5.04080800  | -4.56422300 | -1.69132500 |
| C | 3.86936500  | -4.99169400 | -0.78244600 |
| H | 2.93821000  | -5.00926100 | -1.35911000 |
| H | 4.00909200  | -5.97602900 | -0.32483200 |
| C | 4.38958700  | 1.12039500  | -0.83558600 |
| C | 3.88443900  | 2.02810000  | -1.78793300 |
| C | 4.90611600  | 1.59403000  | 0.39213700  |
| C | 3.33038500  | 1.59673300  | -3.03694100 |
| C | 3.92917100  | 3.44136700  | -1.51953900 |
| C | 4.90070100  | 3.00432500  | 0.66742900  |
| C | 2.91625500  | 2.50325800  | -3.96825300 |
| H | 3.20982900  | 0.53452800  | -3.21941800 |
| C | 3.49442400  | 4.35789100  | -2.52821600 |
| C | 4.42007300  | 3.89266500  | -0.29545400 |
| C | 3.02473700  | 3.90413700  | -3.72325100 |
| H | 2.47082900  | 2.14821700  | -4.89167400 |
| H | 3.54561200  | 5.42248600  | -2.31368400 |
| H | 4.45080900  | 4.96297900  | -0.09630700 |
| H | 2.69716100  | 4.60741300  | -4.48350200 |
| C | -1.16484900 | -3.07684000 | 1.56725300  |
| C | -1.68976900 | -2.13389800 | 2.47573500  |
| C | -1.94758500 | -3.53856500 | 0.49239500  |
| C | -0.91559800 | -1.57598900 | 3.54644100  |
| C | -3.04926600 | -1.69565100 | 2.33558400  |
| C | -3.28131700 | -3.03188300 | 0.31981500  |
| C | -1.47002400 | -0.70177900 | 4.43643400  |
| H | 0.12750700  | -1.86006000 | 3.63928000  |
| C | -3.59668400 | -0.78788600 | 3.29794100  |
| C | -3.81077300 | -2.14703300 | 1.25722600  |
| C | -2.83386800 | -0.29976100 | 4.31709300  |
| H | -0.87065100 | -0.31275400 | 5.25507000  |
| H | -4.64364100 | -0.51303400 | 3.19987700  |
| H | -4.83342100 | -1.79007500 | 1.14124300  |
| H | -3.25883100 | 0.38827100  | 5.04140600  |
| C | 5.98982400  | 1.21727000  | 2.54710100  |
| H | 6.42897700  | 0.53915200  | 3.27204500  |
| C | 5.48976500  | 0.72803300  | 1.37534000  |

|   |             |             |             |
|---|-------------|-------------|-------------|
| H | 5.53986800  | -0.33608300 | 1.17173000  |
| C | 5.94145500  | 2.61315600  | 2.83366700  |
| H | 6.33848400  | 2.98381400  | 3.77379400  |
| C | 5.41423600  | 3.47586200  | 1.91830400  |
| H | 5.39298400  | 4.54654300  | 2.11040400  |
| C | -2.22132000 | -4.85530600 | -1.53626300 |
| H | -1.82802500 | -5.56374600 | -2.25876300 |
| C | -3.52520500 | -4.30989400 | -1.73084800 |
| H | -4.10236500 | -4.59425100 | -2.60509100 |
| C | -4.04154400 | -3.43846200 | -0.82101200 |
| H | -5.03304000 | -3.01403300 | -0.95380200 |
| C | -1.46383800 | -4.49056400 | -0.46327900 |
| H | -0.47186000 | -4.90948300 | -0.33201500 |
| C | 1.44970900  | 2.69430900  | 3.07317500  |
| C | 1.59678700  | 3.43156800  | 1.71957100  |
| H | 2.53097900  | 4.01926500  | 1.75115900  |
| H | 1.78056300  | 2.70544800  | 0.91896100  |
| C | 0.37959200  | 4.58921000  | -0.18100500 |
| C | 0.36251900  | 3.48449100  | -1.05076600 |
| C | 0.15138900  | 5.88011200  | -0.69890300 |
| C | 0.08822100  | 3.66795500  | -2.40090600 |
| H | 0.47997600  | 2.47270700  | -0.67352000 |
| C | -0.07037700 | 6.05945700  | -2.05421000 |
| H | 0.19757600  | 6.74157300  | -0.03976900 |
| C | -0.11526900 | 4.95103000  | -2.90137600 |
| H | 0.04014100  | 2.80240100  | -3.05218000 |
| H | -0.21761900 | 7.05882500  | -2.45071200 |
| H | -0.30997000 | 5.08956400  | -3.96075100 |
| C | 0.56216600  | 4.40462200  | 1.25338500  |
| C | -0.01001600 | 2.28209000  | 3.34006800  |
| H | -0.62245300 | 3.10523600  | 3.70497300  |
| H | -0.01083000 | 1.51295600  | 4.12263200  |
| N | -0.63217000 | 1.71981800  | 2.15513100  |
| C | -1.85868300 | 1.96688200  | 1.68709500  |
| N | -2.25605800 | 1.15149100  | 0.68518100  |
| C | -3.55054300 | 0.98294400  | 0.15274400  |
| C | -3.66460600 | 0.52969900  | -1.16411100 |
| C | -4.70062400 | 1.13714400  | 0.92675300  |
| C | -4.91568400 | 0.21584900  | -1.68039400 |
| C | -5.93951300 | 0.81209300  | 0.38768800  |
| H | -4.63359100 | 1.46986200  | 1.95476500  |
| C | -6.06885400 | 0.34280400  | -0.91364600 |
| H | -7.04105900 | 0.09317400  | -1.32162000 |
| C | -7.12812300 | 0.86620100  | 1.30205700  |

|   |             |             |             |
|---|-------------|-------------|-------------|
| C | -4.99884200 | -0.30306600 | -3.09076400 |
| F | -7.08129400 | -0.14162700 | 2.19810900  |
| F | -8.28516700 | 0.75201300  | 0.64077700  |
| F | -7.16740600 | 2.00293500  | 2.00775800  |
| F | -4.20163100 | 0.38411000  | -3.91561400 |
| F | -6.24922600 | -0.22536300 | -3.57172300 |
| F | -4.62773900 | -1.59058000 | -3.16640700 |
| S | -2.79330200 | 3.30510500  | 2.24483900  |
| H | -2.77446400 | 0.44319000  | -1.77733700 |
| H | -1.53709200 | 0.53357300  | 0.28995200  |
| H | -0.16805800 | 0.88779100  | 1.76339800  |
| C | -0.27224800 | 5.12657600  | 2.12531100  |
| H | 0.01475800  | 5.21807300  | 3.16903800  |
| H | -1.27130500 | 4.34907800  | 2.16297100  |
| H | -0.77801000 | 5.99843500  | 1.71077600  |
| N | 1.38866000  | -0.64149900 | -1.75187100 |
| S | 0.18836600  | -0.07939500 | -2.59172000 |
| O | 0.61759700  | 0.32442200  | -3.92110500 |
| O | -0.68096900 | 0.84602400  | -1.84524400 |
| C | -0.94600800 | -1.50888000 | -2.83683700 |
| F | -0.31100600 | -2.58231300 | -3.27790500 |
| F | -1.90588100 | -1.17613500 | -3.69436200 |
| F | -1.50782800 | -1.78366200 | -1.65791300 |
| C | 2.31894300  | 1.43128200  | 2.98009700  |
| H | 3.35550400  | 1.70029100  | 2.75910200  |
| H | 2.30508300  | 0.89255000  | 3.93469700  |
| H | 1.97653400  | 0.74922500  | 2.19487400  |
| C | 1.96305800  | 3.52828600  | 4.25374300  |
| H | 1.82711300  | 2.97750200  | 5.19100500  |
| H | 3.03501900  | 3.71897100  | 4.13241800  |
| H | 1.45631300  | 4.49175300  | 4.36050900  |

TS-EF-1R-M06-2X-DCM

l imaginary frequencies

H = -5197.126729

G = -5197.305862

E(M06-2X-DCM) = -5199.577199

|   |            |             |             |
|---|------------|-------------|-------------|
| O | 3.00997300 | 0.64135200  | 0.15035000  |
| O | 1.96756200 | -1.67951200 | -0.03440200 |
| P | 1.56846700 | -0.12172400 | 0.15504900  |
| O | 0.72326500 | 0.26787700  | -0.99888100 |
| C | 5.05519800 | 0.24328600  | -3.46302900 |
| C | 5.24243300 | -0.67151000 | -2.43539200 |
| C | 4.59978100 | -0.50123900 | -1.20627700 |

|   |             |             |             |
|---|-------------|-------------|-------------|
| C | 3.49726300  | 1.48843500  | -2.06007700 |
| C | 4.19817000  | 1.32347900  | -3.26001000 |
| C | 2.76643100  | -2.26934000 | 0.93229800  |
| C | 4.14444700  | -2.11135200 | 0.87588100  |
| C | 4.92558700  | -2.57101400 | 1.94045900  |
| C | 4.34784600  | -3.26778800 | 2.99322800  |
| C | 2.97605400  | -3.50918400 | 2.97321300  |
| C | 2.15721700  | -3.00852500 | 1.95374100  |
| H | 4.03464800  | 2.04641700  | -4.05435400 |
| H | 2.51066100  | -4.07769100 | 3.77332300  |
| C | 5.04215300  | -1.56701800 | -0.22282200 |
| C | 5.46204800  | -2.69400600 | -1.21204900 |
| H | 4.56209300  | -3.23864800 | -1.51934400 |
| H | 6.15397500  | -3.40898800 | -0.75674700 |
| H | 6.97605600  | -3.03209300 | 1.42662900  |
| H | 6.82348900  | -1.77506300 | 2.65249800  |
| C | 3.71538200  | 0.55264700  | -1.03990300 |
| H | 5.55472600  | 0.11426500  | -4.41884800 |
| H | 4.95402200  | -3.62681500 | 3.82000300  |
| C | 6.05095800  | -1.94862000 | -2.42455400 |
| H | 5.95620300  | -2.51283900 | -3.35680300 |
| H | 7.11810600  | -1.73592800 | -2.28146200 |
| C | 6.37054600  | -2.17192900 | 1.73922000  |
| C | 6.27031700  | -1.11997900 | 0.61754500  |
| H | 6.05547700  | -0.13672100 | 1.05069200  |
| H | 7.17852800  | -1.03648600 | 0.01261700  |
| C | 0.69605800  | -3.31138900 | 1.96079700  |
| C | -0.09623000 | -2.90068000 | 3.05333400  |
| C | 0.13107400  | -4.09647200 | 0.93096600  |
| C | 0.38657700  | -1.99793800 | 4.05709900  |
| C | -1.45118300 | -3.36755100 | 3.16490700  |
| C | -1.24307800 | -4.50765900 | 1.02647200  |
| C | -0.40008300 | -1.62691200 | 5.10692700  |
| H | 1.37387100  | -1.56575400 | 3.93603700  |
| C | -2.22750400 | -2.98874500 | 4.30696700  |
| C | -1.99040700 | -4.15802400 | 2.15035500  |
| C | -1.72010100 | -2.14595200 | 5.24936200  |
| H | -0.02847800 | -0.90647900 | 5.82810600  |
| H | -3.23873400 | -3.37983800 | 4.39447700  |
| H | -3.01511900 | -4.51686300 | 2.23599000  |
| H | -2.32308900 | -1.85135800 | 6.10272300  |
| C | 2.54391600  | 2.62185800  | -1.88615300 |
| C | 1.37479900  | 2.68243200  | -2.67099600 |
| C | 2.83184800  | 3.64197900  | -0.95727500 |

|   |             |             |             |
|---|-------------|-------------|-------------|
| C | 1.00694900  | 1.64124700  | -3.58656800 |
| C | 0.48878600  | 3.80536900  | -2.54143900 |
| C | 1.92109700  | 4.74206400  | -0.80917800 |
| C | -0.13357400 | 1.72156900  | -4.32990100 |
| H | 1.64034700  | 0.76307900  | -3.65261100 |
| C | -0.68550100 | 3.86384300  | -3.36095400 |
| C | 0.78410000  | 4.80592400  | -1.61452400 |
| C | -0.99372200 | 2.85543400  | -4.22347500 |
| H | -0.40039900 | 0.90991300  | -5.00091600 |
| H | -1.33478200 | 4.73236000  | -3.27415300 |
| H | 0.12977300  | 5.67295000  | -1.53416300 |
| H | -1.89855700 | 2.90297600  | -4.82096500 |
| C | 0.29318600  | -5.28877900 | -1.19016700 |
| H | 0.87204800  | -5.58834400 | -2.05785000 |
| C | 0.87382600  | -4.53384900 | -0.21437000 |
| H | 1.91734700  | -4.25452900 | -0.30483900 |
| C | -1.07413800 | -5.68008100 | -1.09509500 |
| H | -1.51469100 | -6.27823300 | -1.88731700 |
| C | -1.81648200 | -5.30046100 | -0.01812400 |
| H | -2.86175000 | -5.58539000 | 0.07048900  |
| C | 4.27781400  | 4.65221600  | 0.72189900  |
| H | 5.18762600  | 4.63519500  | 1.31379400  |
| C | 3.35218800  | 5.72289100  | 0.89293000  |
| H | 3.56556500  | 6.50613700  | 1.61366200  |
| C | 2.21464700  | 5.76656000  | 0.14506200  |
| H | 1.50951400  | 6.58740000  | 0.25129900  |
| C | 4.02670700  | 3.64985200  | -0.16702800 |
| H | 4.73717500  | 2.83843300  | -0.28478100 |
| N | 1.04144200  | 0.02395300  | 1.67559000  |
| S | 0.39811000  | 1.33791400  | 2.22540500  |
| O | -0.55049100 | 1.08157500  | 3.30182000  |
| O | -0.03808700 | 2.28949500  | 1.17748900  |
| C | 1.75722800  | 2.23949800  | 3.07201500  |
| F | 2.21070800  | 1.51211200  | 4.08793200  |
| F | 1.28408900  | 3.39149700  | 3.54355700  |
| F | 2.75208100  | 2.49084100  | 2.23606200  |
| C | -2.91028900 | 4.91744200  | 0.84557200  |
| C | -3.58511300 | 3.85677900  | 1.77369900  |
| H | -4.17086800 | 4.40471200  | 2.52918900  |
| H | -2.80839200 | 3.33175700  | 2.33282000  |
| C | -4.41610400 | 1.44840400  | 1.51787900  |
| C | -3.15496100 | 0.90989900  | 1.84114100  |
| C | -5.52811700 | 0.57745200  | 1.46082500  |
| C | -2.99762100 | -0.44475700 | 2.09157400  |



|   |             |             |             |
|---|-------------|-------------|-------------|
| H | -2.27814800 | 1.54181000  | 1.85362100  |
| C | -5.37124100 | -0.77353800 | 1.72120300  |
| H | -6.52081200 | 0.96629600  | 1.26114100  |
| C | -4.10724200 | -1.28515400 | 2.03043200  |
| H | -2.01117700 | -0.83034800 | 2.33672400  |
| H | -6.22870100 | -1.43628000 | 1.67729400  |
| H | -3.98525800 | -2.34640700 | 2.21310800  |
| C | -4.54130900 | 2.85660600  | 1.19065400  |
| C | -2.67240900 | 4.37559900  | -0.57954900 |
| H | -3.57351300 | 4.43070800  | -1.19150700 |
| H | -1.91942600 | 5.01284700  | -1.05850400 |
| N | -2.20518200 | 3.00373300  | -0.58361600 |
| C | -2.64987500 | 1.99848500  | -1.35890200 |
| N | -1.86889600 | 0.90864800  | -1.36637900 |
| C | -2.22330900 | -0.39612000 | -1.78600500 |
| C | -3.39795500 | -1.00713100 | -1.34565400 |
| C | -1.31080400 | -1.11405500 | -2.55347900 |
| C | -3.64769400 | -2.32954400 | -1.68989200 |
| C | -1.58575500 | -2.43486300 | -2.89217100 |
| H | -0.38226700 | -0.64298800 | -2.85467700 |
| C | -2.75282900 | -3.05584800 | -2.47226400 |
| H | -2.95868300 | -4.08602700 | -2.73649000 |
| C | -0.59839700 | -3.14575700 | -3.77256900 |
| C | -4.86118300 | -3.01571900 | -1.13590300 |
| F | -0.57622100 | -2.60718100 | -5.00468700 |
| F | 0.64858200  | -3.05740600 | -3.29479300 |
| F | -0.89029000 | -4.44812700 | -3.91735400 |
| F | -5.89396200 | -2.17333700 | -0.98458100 |
| F | -5.26915600 | -4.02427500 | -1.91707200 |
| F | -4.62296000 | -3.54883200 | 0.08246400  |
| S | -4.11444200 | 2.08864400  | -2.25718000 |
| H | -4.10180600 | -0.45340100 | -0.73314000 |
| H | -0.88288300 | 0.97861700  | -1.05832100 |
| H | -1.34350400 | 2.81433500  | -0.05915700 |
| C | -5.52034400 | 3.26012300  | 0.25592300  |
| H | -5.73161200 | 4.32205300  | 0.17139900  |
| H | -4.94560100 | 2.90913000  | -0.78629700 |
| H | -6.39803500 | 2.62488800  | 0.14219000  |
| C | -1.56065700 | 5.27163100  | 1.49338500  |
| H | -1.71170000 | 5.61966000  | 2.52132400  |
| H | -1.07730600 | 6.08032200  | 0.93364100  |
| H | -0.87573200 | 4.41754500  | 1.52427400  |
| C | -3.72924700 | 6.20994800  | 0.73045600  |
| H | -3.20795000 | 6.92534200  | 0.08496700  |

|   |             |            |            |
|---|-------------|------------|------------|
| H | -3.84806300 | 6.67739600 | 1.71320900 |
| H | -4.72408400 | 6.05281700 | 0.30470200 |

TS-EF-1R-1-M06-2X-DCM

l imaginary frequencies

H = -5197.130915

G = -5197.30987

E(M06-2X-DCM) = -5199.571065

|   |             |             |             |
|---|-------------|-------------|-------------|
| O | -2.77824700 | 0.45025500  | -1.25027700 |
| O | -2.75179800 | -0.95349900 | 0.88105200  |
| P | -1.83078200 | 0.05339100  | -0.00259700 |
| O | -1.43911400 | 1.17227000  | 0.89222000  |
| C | -6.33232100 | 2.37480800  | -0.25733500 |
| C | -6.27685600 | 0.98936200  | -0.34427100 |
| C | -5.09421700 | 0.34981300  | -0.72401400 |
| C | -3.97057100 | 2.50746700  | -0.85206200 |
| C | -5.18557100 | 3.12130100  | -0.52576900 |
| C | -3.12886600 | -2.14918000 | 0.28535800  |
| C | -4.22495700 | -2.17753400 | -0.56557300 |
| C | -4.48906200 | -3.34483400 | -1.29053700 |
| C | -3.74289000 | -4.49543300 | -1.07757600 |
| C | -2.71187400 | -4.47207800 | -0.14045100 |
| C | -2.36711100 | -3.29894500 | 0.54014000  |
| H | -5.21235700 | 4.20513800  | -0.45635900 |
| H | -2.13112000 | -5.36955900 | 0.05262400  |
| C | -5.30821600 | -1.14635600 | -0.84874800 |
| C | -6.51797100 | -1.32755400 | 0.11574800  |
| H | -6.13652100 | -1.39297800 | 1.14108600  |
| H | -7.08363200 | -2.24001300 | -0.09450700 |
| H | -6.54346800 | -3.56631100 | -1.94018200 |
| H | -5.38281800 | -3.51868200 | -3.26600500 |
| C | -3.95983800 | 1.11027100  | -0.94843700 |
| H | -7.25286500 | 2.87484200  | 0.02991500  |
| H | -3.95296300 | -5.40338500 | -1.63546200 |
| C | -7.34471600 | -0.03748700 | -0.04393800 |
| H | -7.92536000 | 0.20809700  | 0.84993800  |
| H | -8.05348000 | -0.12000500 | -0.87774100 |
| C | -5.60792000 | -3.10392200 | -2.27916200 |
| C | -5.71092400 | -1.56646800 | -2.28914300 |
| H | -4.97291600 | -1.15380300 | -2.98621300 |
| H | -6.70031700 | -1.19313200 | -2.57071300 |
| C | -1.24244500 | -3.29614200 | 1.52199000  |
| C | 0.06093100  | -3.65181000 | 1.10824900  |
| C | -1.49322900 | -3.00062600 | 2.88054500  |

|   |             |             |             |
|---|-------------|-------------|-------------|
| C | 0.39439200  | -3.91048300 | -0.26200100 |
| C | 1.11758500  | -3.74513600 | 2.07781200  |
| C | -0.42096500 | -3.07545000 | 3.83460800  |
| C | 1.65300500  | -4.29577200 | -0.62008400 |
| H | -0.36557400 | -3.76967100 | -1.02105300 |
| C | 2.43116600  | -4.13113300 | 1.65817300  |
| C | 0.85354100  | -3.45034600 | 3.41453500  |
| C | 2.68914300  | -4.42151400 | 0.35291900  |
| H | 1.88225000  | -4.47397200 | -1.66717800 |
| H | 3.21335500  | -4.18547900 | 2.41084600  |
| H | 1.66192800  | -3.50409900 | 4.14077400  |
| H | 3.68657600  | -4.71102500 | 0.03525300  |
| C | -2.72151600 | 3.29181500  | -1.06569900 |
| C | -2.17922500 | 4.05082600  | -0.00600600 |
| C | -2.07058700 | 3.24638700  | -2.31517000 |
| C | -2.76124300 | 4.09034300  | 1.30351300  |
| C | -0.96898500 | 4.79383800  | -0.21639900 |
| C | -0.84415100 | 3.96972600  | -2.50045700 |
| C | -2.22349000 | 4.85824700  | 2.29571100  |
| H | -3.63770900 | 3.48434300  | 1.50539100  |
| C | -0.42543100 | 5.57299200  | 0.85416300  |
| C | -0.33054800 | 4.73269400  | -1.45446100 |
| C | -1.04256400 | 5.62479100  | 2.06823500  |
| H | -2.69101400 | 4.87575400  | 3.27597700  |
| H | 0.49000000  | 6.12911300  | 0.66713400  |
| H | 0.60064200  | 5.27749200  | -1.59941700 |
| H | -0.63260700 | 6.23318600  | 2.86942100  |
| C | -2.97793800 | -2.27455900 | 4.67651000  |
| H | -3.96476500 | -1.97495400 | 5.01551600  |
| C | -2.78580300 | -2.61516900 | 3.36982500  |
| H | -3.62335300 | -2.59135200 | 2.68191200  |
| C | -1.90035600 | -2.31926700 | 5.61105600  |
| H | -2.07541200 | -2.04674500 | 6.64736000  |
| C | -0.66699300 | -2.72652000 | 5.20139000  |
| H | 0.16449300  | -2.78256500 | 5.89994000  |
| C | -1.91005300 | 2.45916200  | -4.61385100 |
| H | -2.31121900 | 1.87920600  | -5.43920100 |
| C | -0.67537000 | 3.15215800  | -4.78145100 |
| H | -0.15015200 | 3.08958100  | -5.72933000 |
| C | -0.16568600 | 3.89016400  | -3.75792000 |
| H | 0.76932900  | 4.43414900  | -3.87003700 |
| C | -2.58292200 | 2.50686100  | -3.43066400 |
| H | -3.52107500 | 1.97285600  | -3.32268400 |
| N | -0.63846600 | -0.83057600 | -0.64097400 |

|   |             |             |             |
|---|-------------|-------------|-------------|
| S | -0.05319500 | -0.63314500 | -2.09555100 |
| O | 1.20425200  | -1.37760000 | -2.17375100 |
| O | -0.08063100 | 0.73585500  | -2.60029500 |
| C | -1.19742200 | -1.55910600 | -3.22674700 |
| F | -1.68753400 | -2.63700200 | -2.61400900 |
| F | -0.52079400 | -1.94652000 | -4.30080200 |
| F | -2.21218100 | -0.79615900 | -3.61337900 |
| C | -0.06702500 | 1.48678200  | 3.91041900  |
| C | 0.48450600  | 2.59940400  | 2.97514800  |
| H | 0.30782800  | 3.56081700  | 3.48435200  |
| H | -0.13826100 | 2.62965300  | 2.07631400  |
| C | 2.35360800  | 2.87683800  | 1.21302700  |
| C | 1.58933800  | 2.44789700  | 0.10998700  |
| C | 3.59275200  | 3.50587400  | 0.96750500  |
| C | 2.09995800  | 2.55009600  | -1.18074700 |
| H | 0.60154900  | 2.01140000  | 0.24755600  |
| C | 4.07765900  | 3.64646600  | -0.32338400 |
| H | 4.16853700  | 3.91031900  | 1.79315500  |
| C | 3.34625600  | 3.13655400  | -1.39604700 |
| H | 1.51152100  | 2.16742000  | -2.00931300 |
| H | 5.03566900  | 4.12671500  | -0.48959400 |
| H | 3.74444600  | 3.20608700  | -2.40397400 |
| C | 1.93769300  | 2.61894900  | 2.59684800  |
| C | 0.14136100  | 0.04934300  | 3.33053200  |
| H | 0.66438700  | -0.57627300 | 4.05499400  |
| H | -0.83870400 | -0.39995400 | 3.13829500  |
| N | 0.87100000  | -0.04616700 | 2.07535100  |
| C | 2.09145300  | -0.52666400 | 1.85760200  |
| N | 2.36654400  | -0.86561200 | 0.57705900  |
| C | 3.62960000  | -0.81637500 | -0.05223100 |
| C | 4.55089100  | 0.18696900  | 0.25207500  |
| C | 3.91609800  | -1.73273800 | -1.05855500 |
| C | 5.76411200  | 0.23061500  | -0.41739700 |
| C | 5.14382000  | -1.67869200 | -1.70968800 |
| H | 3.17464500  | -2.47023600 | -1.33574100 |
| C | 6.08506300  | -0.70854900 | -1.39509100 |
| H | 7.04564400  | -0.68079500 | -1.89840100 |
| C | 5.42140200  | -2.68537600 | -2.79059400 |
| C | 6.73124900  | 1.34537000  | -0.14245700 |
| F | 4.92087100  | -2.30317000 | -3.97117700 |
| F | 6.73717200  | -2.87813000 | -2.96060700 |
| F | 4.87095300  | -3.87637700 | -2.49818800 |
| F | 6.72882700  | 2.25256100  | -1.13644100 |
| F | 6.44110300  | 2.00563000  | 0.98972700  |

|   |             |             |             |
|---|-------------|-------------|-------------|
| F | 7.98902700  | 0.89590800  | -0.03907100 |
| S | 3.24228000  | -0.66758700 | 3.13435400  |
| H | 4.31710800  | 0.93529900  | 0.99849600  |
| H | 1.57527900  | -1.09734700 | -0.03349500 |
| H | 0.30636500  | 0.15536400  | 1.25102500  |
| C | 2.92915000  | 2.35532600  | 3.54670500  |
| H | 2.69052500  | 2.48146800  | 4.59732600  |
| H | 2.98047800  | 1.03800100  | 3.44363300  |
| H | 3.96489300  | 2.56125900  | 3.28255100  |
| C | -1.57897600 | 1.74589100  | 4.02813700  |
| H | -1.76643900 | 2.70271600  | 4.52911900  |
| H | -2.04377200 | 0.95203000  | 4.62419500  |
| H | -2.04654200 | 1.76129700  | 3.04048300  |
| C | 0.50538400  | 1.50258300  | 5.33958700  |
| H | -0.13073100 | 0.87849100  | 5.97755600  |
| H | 0.50919700  | 2.51428200  | 5.76165800  |
| H | 1.51276900  | 1.08380700  | 5.40115400  |

TS-EF-1R-2-M06-2X-DCM

l imaginary frequencies

H = -5197.128413

G = -5197.307488

E(M06-2X-DCM) = -5199.575229

|   |             |             |             |
|---|-------------|-------------|-------------|
| O | -3.16298400 | 0.52739800  | -0.93993800 |
| O | -2.13736400 | -1.49351800 | 0.25986900  |
| P | -1.73032800 | -0.14452100 | -0.56689100 |
| O | -0.93536500 | 0.66758100  | 0.40487500  |
| C | -5.55537600 | 1.49428400  | 2.32901700  |
| C | -5.60399500 | 0.22447100  | 1.76676300  |
| C | -4.85035500 | -0.07704400 | 0.62967100  |
| C | -3.93696400 | 2.17882300  | 0.63516500  |
| C | -4.74786100 | 2.46614200  | 1.74067700  |
| C | -2.82895700 | -2.47509400 | -0.43542500 |
| C | -4.19832100 | -2.35675100 | -0.59445000 |
| C | -4.86227700 | -3.23619700 | -1.45455300 |
| C | -4.17499900 | -4.27669400 | -2.06584500 |
| C | -2.81938100 | -4.45558600 | -1.78326400 |
| C | -2.12291500 | -3.56116600 | -0.96642500 |
| H | -4.72565200 | 3.47360000  | 2.14694500  |
| H | -2.27904800 | -5.29805500 | -2.20553000 |
| C | -5.19530800 | -1.46115700 | 0.11387700  |
| C | -5.69783100 | -2.12669800 | 1.42896800  |
| H | -4.82555400 | -2.48075000 | 1.99125500  |
| H | -6.34801700 | -2.98544100 | 1.23622200  |

|   |             |             |             |
|---|-------------|-------------|-------------|
| H | -6.95771400 | -3.53785100 | -1.00783800 |
| H | -6.67255200 | -2.84614500 | -2.60317700 |
| C | -3.98605200 | 0.87797000  | 0.11530800  |
| H | -6.14788500 | 1.73501100  | 3.20716200  |
| H | -4.68566400 | -4.95814500 | -2.74002200 |
| C | -6.38792100 | -0.99074400 | 2.20732800  |
| H | -6.35901300 | -1.13977800 | 3.29088600  |
| H | -7.44356300 | -0.89689200 | 1.92241400  |
| C | -6.31937100 | -2.84288400 | -1.56798000 |
| C | -6.33799200 | -1.43351700 | -0.93974900 |
| H | -6.08835800 | -0.68680300 | -1.70180700 |
| H | -7.30280300 | -1.16383800 | -0.49889400 |
| C | -0.71678400 | -3.80847900 | -0.53364700 |
| C | 0.36820900  | -3.69585400 | -1.42255200 |
| C | -0.50482300 | -4.21383400 | 0.80333300  |
| C | 0.20308700  | -3.29881400 | -2.78904600 |
| C | 1.69954000  | -3.98070500 | -0.95508300 |
| C | 0.83346900  | -4.44046700 | 1.27158500  |
| C | 1.27198300  | -3.23645100 | -3.63447800 |
| H | -0.78264700 | -3.00438700 | -3.13362900 |
| C | 2.79036300  | -3.91825400 | -1.88027900 |
| C | 1.90382700  | -4.31180000 | 0.38407900  |
| C | 2.58319900  | -3.57058600 | -3.18249500 |
| H | 1.12708800  | -2.89197700 | -4.65234400 |
| H | 3.79154200  | -4.13483300 | -1.51524600 |
| H | 2.91519100  | -4.49399200 | 0.74171700  |
| H | 3.42090200  | -3.50787300 | -3.87008100 |
| C | -3.08861500 | 3.23001400  | 0.00359000  |
| C | -2.07483000 | 3.86832600  | 0.74721700  |
| C | -3.33805900 | 3.61696200  | -1.33145800 |
| C | -1.77784000 | 3.52800800  | 2.10740000  |
| C | -1.29307900 | 4.90901600  | 0.13853200  |
| C | -2.53383700 | 4.64357100  | -1.93389200 |
| C | -0.81419600 | 4.19172800  | 2.81027500  |
| H | -2.33518800 | 2.72201500  | 2.57465900  |
| C | -0.27934800 | 5.56740800  | 0.90582700  |
| C | -1.53579400 | 5.26559100  | -1.18601200 |
| C | -0.04911500 | 5.23090500  | 2.20500600  |
| H | -0.61162700 | 3.91798100  | 3.84264400  |
| H | 0.30152400  | 6.34818500  | 0.42137000  |
| H | -0.93508500 | 6.04745200  | -1.64627700 |
| H | 0.72391300  | 5.73389500  | 2.77785400  |
| C | -1.34239400 | -4.85779600 | 3.00515400  |
| H | -2.17601000 | -5.05022000 | 3.67449600  |

|   |             |             |             |
|---|-------------|-------------|-------------|
| C | -1.58185900 | -4.45221400 | 1.72271300  |
| H | -2.60340500 | -4.32906400 | 1.37793200  |
| C | -0.00866600 | -5.03807800 | 3.47596500  |
| H | 0.16241900  | -5.34995300 | 4.50177000  |
| C | 1.04297100  | -4.83144400 | 2.63276000  |
| H | 2.06651200  | -4.96805200 | 2.97104300  |
| C | -4.58302300 | 3.42810300  | -3.41748900 |
| H | -5.37919300 | 2.97353500  | -3.99862800 |
| C | -3.75730800 | 4.42069400  | -4.02084600 |
| H | -3.92577200 | 4.70312800  | -5.05517700 |
| C | -2.76912600 | 5.01304900  | -3.29560200 |
| H | -2.13658300 | 5.77984500  | -3.73501800 |
| C | -4.38400300 | 3.04317700  | -2.12494600 |
| H | -5.02928400 | 2.29165100  | -1.68364000 |
| N | -1.16654600 | -0.57587400 | -1.99433700 |
| S | 0.01141500  | 0.12606600  | -2.76819300 |
| O | 0.12372000  | -0.38675200 | -4.12011400 |
| O | 1.24323600  | 0.25639700  | -1.96976900 |
| C | -0.51718700 | 1.88313800  | -2.95988800 |
| F | -1.74640800 | 1.95227300  | -3.45004300 |
| F | 0.31672300  | 2.52295900  | -3.77031500 |
| F | -0.49739900 | 2.48007600  | -1.76549000 |
| C | -0.77544200 | -0.49960800 | 3.93862100  |
| C | -0.12638300 | 0.91501800  | 3.86433100  |
| H | -0.49310900 | 1.49524000  | 4.72792700  |
| H | -0.51684400 | 1.42008900  | 2.97964700  |
| C | 2.01770000  | 1.98049900  | 2.94288400  |
| C | 1.48816700  | 2.18959400  | 1.65264600  |
| C | 3.23907900  | 2.60595800  | 3.27887800  |
| C | 2.18752300  | 2.93964800  | 0.71612300  |
| H | 0.55708900  | 1.72762300  | 1.34180800  |
| C | 3.91398200  | 3.38408200  | 2.35124900  |
| H | 3.64387600  | 2.50848200  | 4.28083100  |
| C | 3.40041900  | 3.53285100  | 1.06033900  |
| H | 1.77649800  | 3.03928500  | -0.28335800 |
| H | 4.85553300  | 3.85108100  | 2.61919100  |
| H | 3.95647400  | 4.10570300  | 0.32490800  |
| C | 1.36498600  | 1.07216000  | 3.88232300  |
| C | 0.03689900  | -1.54125500 | 3.12975400  |
| H | 0.78888100  | -2.02926700 | 3.75190600  |
| H | -0.65015900 | -2.31718500 | 2.77432100  |
| N | 0.71171000  | -0.96459300 | 1.98189300  |
| C | 1.99235900  | -1.11786900 | 1.63315800  |
| N | 2.30895800  | -0.67766000 | 0.40182900  |

|   |             |             |             |
|---|-------------|-------------|-------------|
| C | 3.60799800  | -0.39951400 | -0.08608800 |
| C | 4.50905800  | 0.36552600  | 0.65301100  |
| C | 3.93980500  | -0.82234700 | -1.36697000 |
| C | 5.74951800  | 0.67212300  | 0.11211200  |
| C | 5.20035700  | -0.52952400 | -1.87923300 |
| H | 3.21315000  | -1.36907600 | -1.95692100 |
| C | 6.11810500  | 0.21628300  | -1.15238900 |
| H | 7.09618800  | 0.44425600  | -1.56092000 |
| C | 5.55850600  | -1.10646100 | -3.21921800 |
| C | 6.66640500  | 1.58598300  | 0.87116700  |
| F | 4.58162400  | -0.92647700 | -4.11420200 |
| F | 6.67983800  | -0.56850600 | -3.71693400 |
| F | 5.76040600  | -2.43542000 | -3.13182700 |
| F | 6.49461200  | 1.48405500  | 2.19783300  |
| F | 7.95511900  | 1.33952500  | 0.60500800  |
| F | 6.44693100  | 2.87876700  | 0.55620000  |
| S | 3.17047400  | -1.78048000 | 2.70381800  |
| H | 4.23612500  | 0.72226700  | 1.63936900  |
| H | 1.56295900  | -0.44601300 | -0.26655600 |
| H | 0.10224200  | -0.45633100 | 1.32063700  |
| C | 2.16101900  | 0.30623200  | 4.75715500  |
| H | 1.67163800  | -0.17277700 | 5.59968400  |
| H | 2.49609400  | -0.62308100 | 3.98244600  |
| H | 3.16707500  | 0.66606700  | 4.96956700  |
| C | -2.18952100 | -0.34192600 | 3.35013900  |
| H | -2.77737500 | 0.36648200  | 3.94731100  |
| H | -2.71132300 | -1.30584000 | 3.35433900  |
| H | -2.15878100 | 0.02412100  | 2.32073500  |
| C | -0.93346800 | -1.04318700 | 5.36532100  |
| H | -1.44318000 | -2.01279800 | 5.32642900  |
| H | -1.54491000 | -0.36889800 | 5.97403600  |
| H | 0.01855600  | -1.20450100 | 5.87712700  |

TS-EF-1S-蠅B97X-D

1 imaginary frequencies

H = -5197.532778

G = -5197.712137

E(M06-2X-DCM) = -5199.581798

|   |            |             |             |
|---|------------|-------------|-------------|
| O | 2.23985400 | -1.85196700 | -0.24187300 |
| O | 2.52629500 | 0.68879100  | 0.04009200  |
| P | 1.39823300 | -0.47227300 | -0.13643800 |
| O | 0.59993200 | -0.42008600 | 1.12661500  |
| C | 4.43931000 | -2.89529200 | 3.13375600  |
| C | 4.97895800 | -2.07057900 | 2.15687000  |



|   |             |             |             |
|---|-------------|-------------|-------------|
| C | 4.25546800  | -1.78294300 | 0.99947400  |
| C | 2.37354300  | -3.06851400 | 1.84481400  |
| C | 3.15556600  | -3.40536000 | 2.95587400  |
| C | 3.48020300  | 0.83762400  | -0.95406600 |
| C | 4.57182000  | -0.02052400 | -1.00005700 |
| C | 5.42378300  | 0.02960700  | -2.10708100 |
| C | 5.25523100  | 0.99045300  | -3.09258400 |
| C | 4.22819400  | 1.91905400  | -2.96019000 |
| C | 3.31833100  | 1.85608000  | -1.90048400 |
| H | 2.72235000  | -4.05463200 | 3.71108200  |
| H | 4.10076700  | 2.70096900  | -3.70280100 |
| C | 5.11492400  | -1.01748000 | 0.01368100  |
| C | 6.10807500  | -0.33087700 | 0.99808800  |
| H | 5.63213400  | 0.57164700  | 1.39925100  |
| H | 7.04015900  | -0.03046900 | 0.51021900  |
| H | 7.43702400  | -0.67945200 | -1.75972300 |
| H | 6.56983500  | -1.59394800 | -2.99179200 |
| C | 2.95654400  | -2.24375100 | 0.87373900  |
| H | 5.00321700  | -3.13877900 | 4.02986500  |
| H | 5.91886900  | 1.02673300  | -3.95169900 |
| C | 6.30999200  | -1.35712800 | 2.12895900  |
| H | 6.55551700  | -0.88784500 | 3.08690100  |
| H | 7.12565800  | -2.05331800 | 1.89442200  |
| C | 6.45083900  | -1.07505600 | -2.03562700 |
| C | 5.88123500  | -1.98425300 | -0.93330600 |
| H | 5.16115100  | -2.68687400 | -1.36731400 |
| H | 6.64511100  | -2.56469700 | -0.40716400 |
| C | 2.26249900  | 2.90562200  | -1.78885500 |
| C | 1.24485900  | 2.99004800  | -2.75703400 |
| C | 2.36849700  | 3.89195600  | -0.78523300 |
| C | 1.05227900  | 1.97882100  | -3.75233100 |
| C | 0.34473000  | 4.10757500  | -2.74767200 |
| C | 1.44072700  | 4.98725600  | -0.76674600 |
| C | 0.05260100  | 2.07892000  | -4.67123700 |
| H | 1.68345100  | 1.10001000  | -3.73239900 |
| C | -0.66824000 | 4.19370300  | -3.75365000 |
| C | 0.45776800  | 5.07308100  | -1.75158300 |
| C | -0.81190700 | 3.21142100  | -4.68529400 |
| H | -0.10319300 | 1.27512300  | -5.38259300 |
| H | -1.33631200 | 5.05094800  | -3.73907200 |
| H | -0.23626500 | 5.91072000  | -1.74053000 |
| H | -1.59541800 | 3.27688700  | -5.43449100 |
| C | 0.96493100  | -3.54382100 | 1.72837000  |
| C | 0.01502100  | -3.14827900 | 2.69555800  |

|   |             |             |             |
|---|-------------|-------------|-------------|
| C | 0.58088000  | -4.36717700 | 0.65253800  |
| C | 0.32455900  | -2.27039100 | 3.78558100  |
| C | -1.33828600 | -3.61110500 | 2.58618200  |
| C | -0.78577800 | -4.78508200 | 0.53151500  |
| C | -0.62104000 | -1.91923800 | 4.70407000  |
| H | 1.32878200  | -1.86948600 | 3.86671600  |
| C | -2.30421700 | -3.20395300 | 3.55920200  |
| C | -1.70437700 | -4.41881300 | 1.51007700  |
| C | -1.96051000 | -2.38731500 | 4.59341100  |
| H | -0.35728900 | -1.26135300 | 5.52778800  |
| H | -3.32595300 | -3.55730600 | 3.44662300  |
| H | -2.73859700 | -4.74043800 | 1.41470600  |
| H | -2.70163700 | -2.07880500 | 5.32405800  |
| C | 3.49840000  | 4.86542600  | 1.14634400  |
| H | 4.29915100  | 4.83598000  | 1.87997300  |
| C | 3.39934500  | 3.87762100  | 0.21000200  |
| H | 4.12284500  | 3.06955400  | 0.20302000  |
| C | 2.57042900  | 5.94590200  | 1.16455700  |
| H | 2.66868700  | 6.72789800  | 1.91207700  |
| C | 1.57089900  | 5.99663600  | 0.23870600  |
| H | 0.85968500  | 6.81904000  | 0.23504400  |
| C | 1.07888900  | -5.54457400 | -1.41772200 |
| H | 1.79270600  | -5.85051800 | -2.17656300 |
| C | -0.28995600 | -5.91060600 | -1.55877800 |
| H | -0.60717100 | -6.47616700 | -2.42941800 |
| C | -1.19063800 | -5.55203400 | -0.60494200 |
| H | -2.24010700 | -5.81401800 | -0.69971300 |
| C | 1.49960800  | -4.80726200 | -0.35288500 |
| H | 2.54672000  | -4.54060800 | -0.26457300 |
| C | 0.86350400  | 2.65516500  | 3.71380300  |
| C | 0.38674900  | 3.40396900  | 2.43269800  |
| H | 0.85980400  | 4.39636700  | 2.42248100  |
| H | 0.80500900  | 2.90446400  | 1.55691100  |
| C | -1.62407900 | 3.47057300  | 0.85330800  |
| C | -1.13776100 | 2.45263500  | 0.01341600  |
| C | -2.71291300 | 4.24290000  | 0.40524800  |
| C | -1.74466200 | 2.18636100  | -1.20362200 |
| H | -0.32033200 | 1.81700400  | 0.33239800  |
| C | -3.30723900 | 3.98584900  | -0.82105900 |
| H | -3.07455100 | 5.07259800  | 1.00410000  |
| C | -2.83315600 | 2.94690400  | -1.61850500 |
| H | -1.37162700 | 1.38482600  | -1.83080500 |
| H | -4.14978700 | 4.58575500  | -1.14886400 |
| H | -3.30661700 | 2.72657300  | -2.56841100 |

|   |             |             |             |
|---|-------------|-------------|-------------|
| C | -1.07389800 | 3.66411700  | 2.19647900  |
| C | -0.16497900 | 1.59794600  | 4.17949000  |
| H | -0.97743900 | 2.03854400  | 4.75625600  |
| H | 0.34300700  | 0.88102200  | 4.83675600  |
| N | -0.71327700 | 0.88232200  | 3.05028600  |
| C | -1.98214100 | 0.61834200  | 2.74801200  |
| N | -2.15271700 | -0.21190700 | 1.70268100  |
| C | -3.28481400 | -0.39633200 | 0.87480500  |
| C | -4.16858100 | 0.63712700  | 0.56360500  |
| C | -3.42259400 | -1.63689000 | 0.26462100  |
| C | -5.20605900 | 0.39848800  | -0.32470200 |
| C | -4.45861500 | -1.85339900 | -0.63801500 |
| H | -2.69992400 | -2.41888100 | 0.46619200  |
| C | -5.36437000 | -0.84592200 | -0.93138400 |
| H | -6.17673000 | -1.01990900 | -1.62669600 |
| C | -4.56380900 | -3.20526700 | -1.29393300 |
| C | -6.14373100 | 1.51194800  | -0.70326400 |
| F | -3.53949600 | -3.44779800 | -2.11509800 |
| F | -5.69629700 | -3.33127600 | -2.00564800 |
| F | -4.56789800 | -4.19335700 | -0.37040100 |
| F | -7.41876800 | 1.08979000  | -0.74456800 |
| F | -5.86307400 | 2.00371800  | -1.92707100 |
| F | -6.08805800 | 2.54316300  | 0.15490000  |
| S | -3.29059500 | 1.32202100  | 3.63395200  |
| H | -4.03839200 | 1.62083700  | 0.99369900  |
| H | -1.29177100 | -0.64400300 | 1.34979100  |
| H | -0.02425900 | 0.44150000  | 2.42665500  |
| C | -1.93775300 | 4.02502700  | 3.22757500  |
| H | -1.52122200 | 4.34293800  | 4.17912300  |
| H | -2.50846800 | 2.82580400  | 3.48115700  |
| H | -2.88765600 | 4.49204700  | 2.96960900  |
| N | 0.70986100  | -0.23674400 | -1.55535500 |
| S | -0.35128400 | -1.24614600 | -2.16997300 |
| O | -1.34369700 | -0.53270500 | -2.96270000 |
| O | -0.81149200 | -2.25983200 | -1.22303600 |
| C | 0.63960400  | -2.16836300 | -3.43745100 |
| F | 1.01918900  | -1.33738200 | -4.41343600 |
| F | -0.10780600 | -3.13197700 | -3.96709700 |
| F | 1.72930900  | -2.70966700 | -2.90324400 |
| C | 2.18430300  | 1.95254000  | 3.34671800  |
| H | 2.90298400  | 2.67933500  | 2.95405400  |
| H | 2.62393500  | 1.47529700  | 4.23026900  |
| H | 2.04641100  | 1.18920800  | 2.57416500  |
| C | 1.14048200  | 3.61259200  | 4.88152000  |

|   |            |            |            |
|---|------------|------------|------------|
| H | 1.47669200 | 3.05456700 | 5.76307700 |
| H | 1.93301900 | 4.31914600 | 4.61269700 |
| H | 0.25964300 | 4.19174700 | 5.17505700 |

TS-EF-1S-1-蠅B97X-D

l imaginary frequencies

H = -5197.524509

G = -5197.706545

E(M06-2X-DCM) = -5199.574667

|   |             |             |             |
|---|-------------|-------------|-------------|
| O | -0.93413500 | -2.64299400 | 0.16377100  |
| O | -2.69568800 | -0.84814000 | -0.35790700 |
| P | -1.20511500 | -1.04482500 | 0.27482900  |
| O | -0.27063800 | -0.25888400 | -0.58775100 |
| C | -1.60074600 | -4.71236200 | -3.39299000 |
| C | -2.63270200 | -4.48746800 | -2.49375100 |
| C | -2.39839500 | -3.81921000 | -1.29085100 |
| C | -0.07240600 | -3.51485400 | -1.91824400 |
| C | -0.33002800 | -4.23732300 | -3.08956500 |
| C | -3.75957200 | -1.29962700 | 0.41170900  |
| C | -4.03848600 | -2.65531300 | 0.47750800  |
| C | -4.90891400 | -3.12262000 | 1.46505600  |
| C | -5.60003400 | -2.23425600 | 2.27524000  |
| C | -5.43636000 | -0.86625100 | 2.06885400  |
| C | -4.51104000 | -0.37430800 | 1.14519300  |
| H | 0.49086800  | -4.40194600 | -3.78124700 |
| H | -6.01332500 | -0.15393400 | 2.65112400  |
| C | -3.65507600 | -3.80135100 | -0.44116900 |
| C | -4.73824100 | -3.95388600 | -1.55454600 |
| H | -4.93427800 | -2.96509000 | -1.98542500 |
| H | -5.68367500 | -4.34296200 | -1.16567500 |
| H | -5.87153200 | -5.02513400 | 1.08173400  |
| H | -4.80493700 | -5.04040800 | 2.48365400  |
| C | -1.13293500 | -3.31575300 | -1.02520500 |
| H | -1.77966300 | -5.24315700 | -4.32372200 |
| H | -6.27547600 | -2.59370700 | 3.04610500  |
| C | -4.09025600 | -4.85686900 | -2.61529500 |
| H | -4.48739600 | -4.68524800 | -3.62065100 |
| H | -4.24514900 | -5.91890700 | -2.38404100 |
| C | -4.92381400 | -4.63470100 | 1.47423900  |
| C | -3.74042500 | -4.99218100 | 0.55133900  |
| H | -2.81229400 | -5.03083300 | 1.13183200  |
| H | -3.86303100 | -5.95270300 | 0.04122800  |
| C | -4.42168900 | 1.09313800  | 0.88342400  |
| C | -3.87108100 | 1.97219800  | 1.83413400  |

|   |             |             |             |
|---|-------------|-------------|-------------|
| C | -5.00251400 | 1.59932200  | -0.29928000 |
| C | -3.27548500 | 1.50549700  | 3.04885300  |
| C | -3.91062500 | 3.38946300  | 1.59952400  |
| C | -5.00796500 | 3.01424500  | -0.53769000 |
| C | -2.78679500 | 2.38179000  | 3.97103900  |
| H | -3.18993700 | 0.43919300  | 3.21875900  |
| C | -3.39380700 | 4.27451500  | 2.59618900  |
| C | -4.46736900 | 3.87416000  | 0.41802600  |
| C | -2.86191300 | 3.78664800  | 3.75027500  |
| H | -2.31402300 | 1.99670900  | 4.86818000  |
| H | -3.42845100 | 5.34423600  | 2.40691800  |
| H | -4.49325100 | 4.94854000  | 0.24393400  |
| H | -2.46790500 | 4.46747900  | 4.49896300  |
| C | 1.30093600  | -2.98862700 | -1.67609300 |
| C | 1.83682800  | -2.02701700 | -2.55697900 |
| C | 2.08529400  | -3.50315600 | -0.62659700 |
| C | 1.07770500  | -1.44200700 | -3.62363800 |
| C | 3.20018300  | -1.60934800 | -2.40410400 |
| C | 3.42126500  | -3.01459500 | -0.43596700 |
| C | 1.64844200  | -0.56568300 | -4.49929600 |
| H | 0.03218900  | -1.71018800 | -3.72991100 |
| C | 3.76378500  | -0.69681600 | -3.35094100 |
| C | 3.95318700  | -2.09454600 | -1.33658100 |
| C | 3.01543100  | -0.18769300 | -4.36897100 |
| H | 1.05819200  | -0.15306000 | -5.31300400 |
| H | 4.81044100  | -0.42835900 | -3.23978900 |
| H | 4.97657800  | -1.74827300 | -1.20836000 |
| H | 3.45405300  | 0.50373700  | -5.08177100 |
| C | -6.17121500 | 1.27348400  | -2.41599500 |
| H | -6.63691500 | 0.61252600  | -3.14066500 |
| C | -5.62662700 | 0.75734300  | -1.27708200 |
| H | -5.66481900 | -0.31159800 | -1.09917500 |
| C | -6.13468900 | 2.67454400  | -2.66803000 |
| H | -6.56755500 | 3.06832500  | -3.58285300 |
| C | -5.57458000 | 3.51527500  | -1.75268100 |
| H | -5.56104100 | 4.58950900  | -1.92263600 |
| C | 2.38097200  | -4.96438500 | 1.29626700  |
| H | 1.99464100  | -5.72422900 | 1.96875800  |
| C | 3.68705500  | -4.43903800 | 1.51180000  |
| H | 4.27636300  | -4.79260900 | 2.35213600  |
| C | 4.19144400  | -3.49910600 | 0.66653500  |
| H | 5.18527600  | -3.08876400 | 0.81964800  |
| C | 1.60933800  | -4.51505200 | 0.26742600  |
| H | 0.61443200  | -4.92032700 | 0.12123600  |

|   |             |             |             |
|---|-------------|-------------|-------------|
| C | -1.60493900 | 2.64687200  | -3.03115200 |
| C | -1.67645100 | 3.30317000  | -1.63002000 |
| H | -2.65184800 | 3.80579100  | -1.53515900 |
| H | -1.72233900 | 2.52280200  | -0.86253800 |
| C | -0.42851900 | 4.50160100  | 0.23203000  |
| C | -0.21887200 | 3.39684800  | 1.07308200  |
| C | -0.31112000 | 5.80019800  | 0.76166500  |
| C | 0.14550300  | 3.59667900  | 2.39893700  |
| H | -0.27546300 | 2.37903300  | 0.69713800  |
| C | 0.00571600  | 5.98947100  | 2.09679700  |
| H | -0.50882000 | 6.65953900  | 0.12782100  |
| C | 0.25360500  | 4.88543000  | 2.90992500  |
| H | 0.33911700  | 2.72942600  | 3.01762900  |
| H | 0.07078800  | 6.99526700  | 2.50002000  |
| H | 0.52570400  | 5.02982100  | 3.95125800  |
| C | -0.68078700 | 4.33277400  | -1.19942300 |
| C | -0.15198800 | 2.28077200  | -3.40503800 |
| H | 0.41761200  | 3.13187900  | -3.77479500 |
| H | -0.17606400 | 1.54042600  | -4.21359200 |
| N | 0.55116400  | 1.69566500  | -2.28340300 |
| C | 1.74968800  | 2.00953500  | -1.79365900 |
| N | 2.17970000  | 1.19989700  | -0.80490400 |
| C | 3.46001800  | 1.09756600  | -0.22344200 |
| C | 3.52745100  | 0.65115700  | 1.09588200  |
| C | 4.62873400  | 1.30249200  | -0.94884800 |
| C | 4.76441000  | 0.39088700  | 1.66957300  |
| C | 5.85724100  | 1.03204600  | -0.35768900 |
| H | 4.58625600  | 1.62929200  | -1.97899300 |
| C | 5.94067500  | 0.57009500  | 0.94918500  |
| H | 6.90285100  | 0.36090900  | 1.40057100  |
| C | 7.08860400  | 1.12477400  | -1.21370900 |
| C | 4.82587400  | -0.14711100 | 3.07591700  |
| F | 7.18297700  | 0.04703900  | -2.02716500 |
| F | 8.21502000  | 1.16776800  | -0.48942000 |
| F | 7.07042100  | 2.20459300  | -2.00886300 |
| F | 3.82411600  | 0.31516900  | 3.83163600  |
| F | 5.98127700  | 0.18721900  | 3.67975900  |
| F | 4.75364000  | -1.48991700 | 3.09085200  |
| S | 2.61568600  | 3.41211100  | -2.31496000 |
| H | 2.61158700  | 0.51504700  | 1.66273300  |
| H | 1.49871100  | 0.50426100  | -0.48199500 |
| H | 0.11218500  | 0.86711900  | -1.86669300 |
| C | 0.06999600  | 5.11369500  | -2.08139800 |
| H | -0.24810600 | 5.21033000  | -3.11505900 |

|   |             |             |             |
|---|-------------|-------------|-------------|
| H | 1.13597900  | 4.36121200  | -2.17856100 |
| H | 0.56787100  | 5.99214800  | -1.67063000 |
| N | -1.33374400 | -0.80286600 | 1.84041300  |
| S | -0.23037500 | -0.40011000 | 2.87997400  |
| O | -0.80932700 | -0.24476200 | 4.20372400  |
| O | 0.68088300  | 0.64791900  | 2.39950500  |
| C | 0.89054900  | -1.87313600 | 2.99574200  |
| F | 0.20020100  | -3.00360700 | 3.08153700  |
| F | 1.67893400  | -1.76287100 | 4.05847400  |
| F | 1.65169900  | -1.90948300 | 1.89873600  |
| C | -2.44319800 | 1.35917700  | -2.96271200 |
| H | -3.47499300 | 1.58697600  | -2.68496400 |
| H | -2.46096200 | 0.86665000  | -3.94202300 |
| H | -2.05876700 | 0.64783200  | -2.22673000 |
| C | -2.20885900 | 3.53084500  | -4.13233500 |
| H | -2.13459500 | 3.02830900  | -5.10357600 |
| H | -3.27133100 | 3.70266200  | -3.92840300 |
| H | -1.72163100 | 4.50530800  | -4.22918700 |

TS-EF-1R-蠅B97X-D

l imaginary frequencies

H = -5197.524857

G = - 5197.706299

E(M06-2X-DCM) = -5199.576684

|   |            |             |             |
|---|------------|-------------|-------------|
| O | 3.04748500 | 0.32108600  | 0.09236100  |
| O | 1.74823100 | -1.88016900 | -0.02291700 |
| P | 1.53590300 | -0.28511600 | 0.14712300  |
| O | 0.71103100 | 0.17021500  | -0.99993300 |
| C | 5.02967200 | -0.31395000 | -3.51745800 |
| C | 5.10019400 | -1.24662600 | -2.49303400 |
| C | 4.48707100 | -0.99959700 | -1.26359300 |
| C | 3.63316200 | 1.10757200  | -2.11502600 |
| C | 4.31494500 | 0.86262000  | -3.31138900 |
| C | 2.49833300 | -2.55973100 | 0.92004600  |
| C | 3.88358700 | -2.54717900 | 0.83771700  |
| C | 4.63011800 | -3.09223100 | 1.88485200  |
| C | 4.00397100 | -3.74518300 | 2.93633800  |
| C | 2.61661000 | -3.85158200 | 2.93487300  |
| C | 1.83618400 | -3.25052100 | 1.94154300  |
| H | 4.24484300 | 1.60141900  | -4.10439600 |
| H | 2.11180800 | -4.38548300 | 3.73440600  |
| C | 4.81656200 | -2.10347500 | -0.27730300 |
| C | 5.09259000 | -3.27657200 | -1.26505200 |
| H | 4.13350100 | -3.72020800 | -1.55548500 |

|   |             |             |             |
|---|-------------|-------------|-------------|
| H | 5.70539500  | -4.06434800 | -0.81685100 |
| H | 6.62256900  | -3.75283000 | 1.35950200  |
| H | 6.60004400  | -2.47978500 | 2.57765600  |
| C | 3.73136200  | 0.14976900  | -1.09784300 |
| H | 5.51085200  | -0.50059700 | -4.47329100 |
| H | 4.58430700  | -4.17542400 | 3.74762100  |
| C | 5.74599600  | -2.61139900 | -2.48960600 |
| H | 5.56546800  | -3.16286800 | -3.41748600 |
| H | 6.83427300  | -2.53216500 | -2.36798700 |
| C | 6.10352400  | -2.83668200 | 1.66984700  |
| C | 6.09755900  | -1.78567500 | 0.54444300  |
| H | 5.99662100  | -0.78241600 | 0.97332400  |
| H | 7.00230600  | -1.80091800 | -0.07104000 |
| C | 0.35159700  | -3.39293800 | 1.98286300  |
| C | -0.36621100 | -2.89040600 | 3.08695000  |
| C | -0.31856500 | -4.11030400 | 0.96887700  |
| C | 0.23735300  | -2.05578100 | 4.08274500  |
| C | -1.76270400 | -3.19357900 | 3.22343800  |
| C | -1.73019900 | -4.34438400 | 1.08220200  |
| C | -0.47788300 | -1.60008400 | 5.14872300  |
| H | 1.26587300  | -1.74367700 | 3.94821200  |
| C | -2.46627700 | -2.73103100 | 4.38076900  |
| C | -2.41019600 | -3.90793700 | 2.21730600  |
| C | -1.84535600 | -1.95945000 | 5.31515300  |
| H | -0.00832500 | -0.93479500 | 5.86581900  |
| H | -3.51571600 | -2.99567400 | 4.48691200  |
| H | -3.46966900 | -4.13588600 | 2.31867100  |
| H | -2.39375600 | -1.59883600 | 6.18029200  |
| C | 2.81653400  | 2.34633100  | -1.96187500 |
| C | 1.65850300  | 2.51850000  | -2.74548600 |
| C | 3.22307500  | 3.35158100  | -1.06374900 |
| C | 1.16817600  | 1.50318500  | -3.63031200 |
| C | 0.91231100  | 3.73935600  | -2.64938600 |
| C | 2.45488900  | 4.55751900  | -0.95529200 |
| C | 0.03849800  | 1.69158100  | -4.36894100 |
| H | 1.69698800  | 0.55848200  | -3.67989600 |
| C | -0.26000200 | 3.90437400  | -3.45432400 |
| C | 1.33440200  | 4.73077500  | -1.76482100 |
| C | -0.68906200 | 2.91362800  | -4.28414500 |
| H | -0.32291100 | 0.89779400  | -5.01652400 |
| H | -0.81224900 | 4.83823000  | -3.38017400 |
| H | 0.78690400  | 5.67048000  | -1.71358600 |
| H | -1.59222600 | 3.04431300  | -4.87177800 |
| C | -0.33308900 | -5.31319400 | -1.15116300 |



|   |             |             |             |
|---|-------------|-------------|-------------|
| H | 0.19461600  | -5.68878000 | -2.02168600 |
| C | 0.34955700  | -4.64353000 | -0.18061600 |
| H | 1.42020500  | -4.50838700 | -0.27884300 |
| C | -1.73783700 | -5.51624900 | -1.04539900 |
| H | -2.26273100 | -6.04538400 | -1.83488300 |
| C | -2.41208100 | -5.04943100 | 0.04105000  |
| H | -3.48442700 | -5.19497500 | 0.13610000  |
| C | 4.76388900  | 4.22024000  | 0.60906800  |
| H | 5.65637100  | 4.10424500  | 1.21641800  |
| C | 3.98114600  | 5.40280200  | 0.73517700  |
| H | 4.28259200  | 6.17347300  | 1.43825800  |
| C | 2.86681100  | 5.56650400  | -0.02986300 |
| H | 2.26854200  | 6.47125900  | 0.04690700  |
| C | 4.40054300  | 3.23459500  | -0.25842000 |
| H | 5.00594700  | 2.33898100  | -0.34327900 |
| N | 1.05768700  | -0.05268700 | 1.66669000  |
| S | 0.65169200  | 1.33797800  | 2.25229100  |
| O | -0.34700200 | 1.22050000  | 3.30775900  |
| O | 0.40246600  | 2.37925600  | 1.23132600  |
| C | 2.14843900  | 1.94257000  | 3.15822900  |
| F | 2.42592300  | 1.10914200  | 4.15983500  |
| F | 1.89423000  | 3.15048600  | 3.66135800  |
| F | 3.20287400  | 2.02069800  | 2.35991900  |
| C | -2.26189400 | 5.18122800  | 0.91436600  |
| C | -3.09933300 | 4.24538700  | 1.84593600  |
| H | -3.60842300 | 4.88576500  | 2.58231400  |
| H | -2.41137100 | 3.63120800  | 2.42809600  |
| C | -4.24246900 | 1.96088800  | 1.63239400  |
| C | -3.06621000 | 1.26287600  | 1.95682400  |
| C | -5.45501400 | 1.24097000  | 1.58143700  |
| C | -3.08381100 | -0.10243100 | 2.19094200  |
| H | -2.11271400 | 1.76905200  | 1.99173600  |
| C | -5.47467300 | -0.12068100 | 1.83403400  |
| H | -6.39054900 | 1.75308400  | 1.38304700  |
| C | -4.28811900 | -0.79505700 | 2.12651000  |
| H | -2.15410900 | -0.61122000 | 2.42195600  |
| H | -6.41173600 | -0.66475500 | 1.78930600  |
| H | -4.30120400 | -1.86530000 | 2.29368000  |
| C | -4.18054900 | 3.37144700  | 1.27299500  |
| C | -2.04665200 | 4.58235700  | -0.49474600 |
| H | -2.90412000 | 4.77025600  | -1.14110100 |
| H | -1.18809800 | 5.08885200  | -0.94700400 |
| N | -1.79147200 | 3.15601800  | -0.49555000 |
| C | -2.39289700 | 2.23539200  | -1.26532800 |

|   |             |             |             |
|---|-------------|-------------|-------------|
| N | -1.79710100 | 1.03805400  | -1.29415500 |
| C | -2.33345100 | -0.18937400 | -1.74951700 |
| C | -3.56859900 | -0.65888000 | -1.31027400 |
| C | -1.53101600 | -0.98746100 | -2.55674000 |
| C | -3.99467100 | -1.92297700 | -1.69882700 |
| C | -1.97233200 | -2.24903700 | -2.93649900 |
| H | -0.55558100 | -0.62517500 | -2.85566200 |
| C | -3.20502200 | -2.72682400 | -2.51643300 |
| H | -3.54275400 | -3.71193400 | -2.81103500 |
| C | -1.09535000 | -3.04884000 | -3.85983100 |
| C | -5.29156300 | -2.45927400 | -1.16169900 |
| F | -1.05125500 | -2.48925600 | -5.08568000 |
| F | 0.16957300  | -3.10861600 | -3.41972300 |
| F | -1.53248600 | -4.31007600 | -4.01875600 |
| F | -6.21218300 | -1.49305300 | -1.00485700 |
| F | -5.82123600 | -3.39637100 | -1.96315800 |
| F | -5.13268200 | -3.03646400 | 0.05114800  |
| S | -3.84316500 | 2.55547500  | -2.14488300 |
| H | -4.18357900 | -0.04514400 | -0.66373900 |
| H | -0.80050000 | 0.95593400  | -1.02466100 |
| H | -0.96254900 | 2.84545900  | 0.02331900  |
| C | -5.08294300 | 3.87329100  | 0.32455100  |
| H | -5.15318500 | 4.94994900  | 0.20018100  |
| H | -4.52986800 | 3.41878300  | -0.73822900 |
| H | -6.02785900 | 3.34891900  | 0.18634900  |
| C | -0.90199400 | 5.38872200  | 1.60668100  |
| H | -1.04423300 | 5.78820900  | 2.61741500  |
| H | -0.29741600 | 6.10990700  | 1.04482100  |
| H | -0.33006500 | 4.45970500  | 1.68560900  |
| C | -2.91039400 | 6.56322900  | 0.73400100  |
| H | -2.28065400 | 7.19328200  | 0.09553600  |
| H | -3.01187000 | 7.07041900  | 1.69935100  |
| H | -3.89933700 | 6.51726100  | 0.26863700  |

TS-EF-1R-1-蠅B97X-D

1 imaginary frequencies

H = -5197.526414

G = -5197.705988

E(M06-2X-DCM) = -5199.576092

|   |             |             |             |
|---|-------------|-------------|-------------|
| O | -3.16546700 | 0.52507900  | -0.97603600 |
| O | -2.12385600 | -1.50399300 | 0.21088700  |
| P | -1.73275700 | -0.15374800 | -0.62319600 |
| O | -0.92310900 | 0.64782200  | 0.34446300  |
| C | -5.63440700 | 1.50258500  | 2.22956800  |

|   |             |             |             |
|---|-------------|-------------|-------------|
| C | -5.64328000 | 0.22354300  | 1.69165300  |
| C | -4.86654000 | -0.08198000 | 0.57287900  |
| C | -3.99185900 | 2.18627600  | 0.56191100  |
| C | -4.83646500 | 2.47817300  | 1.63907900  |
| C | -2.82057000 | -2.50578200 | -0.43998900 |
| C | -4.18758700 | -2.38444800 | -0.61341300 |
| C | -4.84978900 | -3.28922100 | -1.44545800 |
| C | -4.17102300 | -4.36705600 | -1.99628700 |
| C | -2.82704400 | -4.55683400 | -1.67649400 |
| C | -2.12887100 | -3.63310700 | -0.89594300 |
| H | -4.84465700 | 3.49241300  | 2.02733100  |
| H | -2.29670700 | -5.43057500 | -2.04350900 |
| C | -5.19052800 | -1.47641700 | 0.07056900  |
| C | -5.69386300 | -2.13068600 | 1.39261500  |
| H | -4.82164700 | -2.46492400 | 1.96708200  |
| H | -6.32952400 | -3.00233400 | 1.21066100  |
| H | -6.95664800 | -3.57154500 | -1.04170700 |
| H | -6.62954300 | -2.90614400 | -2.63991600 |
| C | -4.00458400 | 0.87655700  | 0.06231100  |
| H | -6.24971300 | 1.74751200  | 3.09075200  |
| H | -4.68178800 | -5.07184100 | -2.64607100 |
| C | -6.40739400 | -0.99591500 | 2.14792800  |
| H | -6.37972000 | -1.12696700 | 3.23432800  |
| H | -7.46419700 | -0.92682800 | 1.85907700  |
| C | -6.29985800 | -2.88901900 | -1.59650900 |
| C | -6.32487400 | -1.46983200 | -0.99310400 |
| H | -6.07379200 | -0.73383800 | -1.76491100 |
| H | -7.29518500 | -1.19599500 | -0.56733600 |
| C | -0.73557100 | -3.89045400 | -0.42953900 |
| C | 0.36522900  | -3.80821800 | -1.29991400 |
| C | -0.55138900 | -4.26644100 | 0.91835600  |
| C | 0.22657900  | -3.45053800 | -2.67858900 |
| C | 1.68404800  | -4.08718300 | -0.80172600 |
| C | 0.77364200  | -4.50173000 | 1.41386000  |
| C | 1.30963500  | -3.41025600 | -3.50502500 |
| H | -0.75143200 | -3.17087500 | -3.05307600 |
| C | 2.79236400  | -4.03926700 | -1.70461200 |
| C | 1.85965500  | -4.39967300 | 0.54464200  |
| C | 2.61064300  | -3.72237500 | -3.01761000 |
| H | 1.18381500  | -3.09866200 | -4.53557900 |
| H | 3.78689900  | -4.24510900 | -1.31734800 |
| H | 2.86241200  | -4.58288000 | 0.92351100  |
| H | 3.46227200  | -3.67049100 | -3.68826100 |
| C | -3.14083900 | 3.25084800  | -0.04387500 |

|   |             |             |             |
|---|-------------|-------------|-------------|
| C | -2.15822900 | 3.89917300  | 0.73197300  |
| C | -3.36049000 | 3.64516300  | -1.38056900 |
| C | -1.89962700 | 3.56411200  | 2.10048900  |
| C | -1.37324800 | 4.95072500  | 0.15046500  |
| C | -2.55337700 | 4.68237500  | -1.95556000 |
| C | -0.97243300 | 4.24283500  | 2.83509100  |
| H | -2.45725600 | 2.75137100  | 2.55264100  |
| C | -0.39496900 | 5.62244600  | 0.94998200  |
| C | -1.58155300 | 5.30824300  | -1.17889400 |
| C | -0.20441300 | 5.29122100  | 2.25612900  |
| H | -0.80188800 | 3.97123200  | 3.87326200  |
| H | 0.19238200  | 6.41102600  | 0.48658700  |
| H | -0.97711400 | 6.09866700  | -1.61875300 |
| H | 0.54211800  | 5.80567600  | 2.85326600  |
| C | -1.43347900 | -4.81229900 | 3.12782500  |
| H | -2.28061600 | -4.95768600 | 3.79226500  |
| C | -1.64496800 | -4.45008000 | 1.82875300  |
| H | -2.65824500 | -4.31310800 | 1.46690100  |
| C | -0.11266800 | -5.00952000 | 3.62206900  |
| H | 0.03757200  | -5.28886900 | 4.66068600  |
| C | 0.95405000  | -4.85773600 | 2.78755100  |
| H | 1.96795600  | -5.00667300 | 3.14826000  |
| C | -4.55791100 | 3.46267700  | -3.49417700 |
| H | -5.33636700 | 3.00428600  | -4.09645200 |
| C | -3.73154800 | 4.46906900  | -4.06881000 |
| H | -3.88095000 | 4.76090100  | -5.10378300 |
| C | -2.76443500 | 5.06272500  | -3.31759600 |
| H | -2.13144300 | 5.83936000  | -3.73891700 |
| C | -4.38173400 | 3.06820900  | -2.20210600 |
| H | -5.02848200 | 2.30591100  | -1.78323600 |
| N | -1.19454700 | -0.56732500 | -2.06212600 |
| S | 0.03731700  | 0.03662600  | -2.83080400 |
| O | 0.15054700  | -0.54266300 | -4.15557000 |
| O | 1.25745800  | 0.13102200  | -2.01133800 |
| C | -0.38606300 | 1.81864600  | -3.12659400 |
| F | -1.58092400 | 1.92907500  | -3.69081600 |
| F | 0.52616100  | 2.37339200  | -3.91958000 |
| F | -0.39629900 | 2.48026100  | -1.96490700 |
| C | -0.77794600 | -0.44858600 | 3.91164000  |
| C | -0.14624600 | 0.97444800  | 3.84734700  |
| H | -0.51388700 | 1.54113100  | 4.71751300  |
| H | -0.55477600 | 1.48390500  | 2.97563000  |
| C | 1.95283100  | 2.10139500  | 2.90264400  |
| C | 1.41573600  | 2.27964300  | 1.61445600  |

|   |              |              |              |
|---|--------------|--------------|--------------|
| C | 3. 13975700  | 2. 78629500  | 3. 23353400  |
| C | 2. 07600400  | 3. 05731800  | 0. 67421200  |
| H | 0. 50775200  | 1. 77639400  | 1. 30514100  |
| C | 3. 77584500  | 3. 59205600  | 2. 30212000  |
| H | 3. 55211500  | 2. 71257200  | 4. 23453200  |
| C | 3. 25670000  | 3. 71068100  | 1. 01278300  |
| H | 1. 65891300  | 3. 13513300  | -0. 32349700 |
| H | 4. 69275300  | 4. 10565100  | 2. 56939600  |
| H | 3. 78008600  | 4. 30957700  | 0. 27456200  |
| C | 1. 34318000  | 1. 16383100  | 3. 84944600  |
| C | 0. 03672600  | -1. 48440400 | 3. 09514500  |
| H | 0. 78019800  | -1. 97936300 | 3. 71960900  |
| H | -0. 64901200 | -2. 25521800 | 2. 73320100  |
| N | 0. 72289700  | -0. 91607100 | 1. 95183000  |
| C | 2. 00805700  | -1. 06156600 | 1. 62764000  |
| N | 2. 35435400  | -0. 65044400 | 0. 39730300  |
| C | 3. 66532600  | -0. 37886400 | -0. 06514800 |
| C | 4. 52381900  | 0. 45602900  | 0. 64472900  |
| C | 4. 04615500  | -0. 88624500 | -1. 29883200 |
| C | 5. 77888500  | 0. 74503200  | 0. 12838600  |
| C | 5. 31154700  | -0. 59680700 | -1. 79945200 |
| H | 3. 35140300  | -1. 49726400 | -1. 86181800 |
| C | 6. 18868400  | 0. 21399800  | -1. 09275100 |
| H | 7. 17334400  | 0. 43480300  | -1. 48663900 |
| C | 5. 71930700  | -1. 23621400 | -3. 09920400 |
| C | 6. 66857800  | 1. 71099500  | 0. 86018800  |
| F | 4. 78141000  | -1. 08276400 | -4. 04372000 |
| F | 6. 86772600  | -0. 73127100 | -3. 57592800 |
| F | 5. 90241300  | -2. 56453700 | -2. 94642100 |
| F | 6. 47326800  | 1. 66947100  | 2. 18946600  |
| F | 7. 96880500  | 1. 46840400  | 0. 63424700  |
| F | 6. 43785400  | 2. 98422400  | 0. 47589600  |
| S | 3. 17329200  | -1. 68268300 | 2. 74377300  |
| H | 4. 20861300  | 0. 87954100  | 1. 58979400  |
| H | 1. 62765100  | -0. 44417100 | -0. 29840500 |
| H | 0. 11838700  | -0. 42628000 | 1. 27438900  |
| C | 2. 16781300  | 0. 42739100  | 4. 70830200  |
| H | 1. 70836200  | -0. 07608100 | 5. 55410100  |
| H | 2. 53461600  | -0. 53335800 | 3. 92297300  |
| H | 3. 17278400  | 0. 80184600  | 4. 90099300  |
| C | -2. 19840900 | -0. 30527100 | 3. 33239000  |
| H | -2. 78694500 | 0. 40937000  | 3. 92068600  |
| H | -2. 71870900 | -1. 26925400 | 3. 35182600  |
| H | -2. 17522100 | 0. 04436900  | 2. 29874600  |

|   |             |             |            |
|---|-------------|-------------|------------|
| C | -0.91565000 | -0.99762900 | 5.34023200 |
| H | -1.39997000 | -1.98047300 | 5.30920500 |
| H | -1.53812400 | -0.33757900 | 5.95429300 |
| H | 0.04515700  | -1.13100900 | 5.84537000 |

TS-EF-1R-2-蠅B97X-D

l imaginary frequencies

H = -5197.527958

G = -5197.706877

E(M06-2X-DCM) = -5199.574272

|   |             |             |             |
|---|-------------|-------------|-------------|
| O | -2.70865400 | 0.35295900  | -1.20541200 |
| O | -2.41636500 | -1.01789800 | 0.93888200  |
| P | -1.61700600 | -0.04600000 | -0.08937500 |
| O | -1.15059700 | 1.09461900  | 0.75260300  |
| C | -6.23066200 | 2.21268600  | -0.00021900 |
| C | -6.12556700 | 0.82933800  | -0.00571900 |
| C | -4.96011500 | 0.20542500  | -0.45571300 |
| C | -3.93845900 | 2.38522800  | -0.80798600 |
| C | -5.14509300 | 2.97645800  | -0.41944600 |
| C | -2.86336400 | -2.24138600 | 0.46937300  |
| C | -4.03475800 | -2.31014200 | -0.27062900 |
| C | -4.36756400 | -3.51297100 | -0.89900700 |
| C | -3.62479800 | -4.66082800 | -0.66940500 |
| C | -2.52525200 | -4.59572800 | 0.18052900  |
| C | -2.10192800 | -3.38509400 | 0.73891000  |
| H | -5.21140300 | 4.06041500  | -0.41990000 |
| H | -1.94610300 | -5.49067400 | 0.38667800  |
| C | -5.14872800 | -1.29962500 | -0.49807000 |
| C | -6.25742800 | -1.46237800 | 0.58595100  |
| H | -5.77993500 | -1.47495700 | 1.57245500  |
| H | -6.81754900 | -2.39512100 | 0.47371800  |
| H | -6.46205600 | -3.77578900 | -1.38892300 |
| H | -5.39790300 | -3.77235200 | -2.79372400 |
| C | -3.87538100 | 0.98646200  | -0.81713900 |
| H | -7.14274000 | 2.69819500  | 0.33519800  |
| H | -3.89149400 | -5.59967500 | -1.14607500 |
| C | -7.12887500 | -0.20245400 | 0.44912400  |
| H | -7.62309500 | 0.07539900  | 1.38527700  |
| H | -7.91704800 | -0.34219000 | -0.30216600 |
| C | -5.55692700 | -3.31970300 | -1.81010200 |
| C | -5.67532900 | -1.78545100 | -1.87724800 |
| H | -5.01126800 | -1.39780200 | -2.65714000 |
| H | -6.69040100 | -1.43397600 | -2.08568500 |
| C | -0.88053500 | -3.35014400 | 1.59620700  |

|   |             |             |             |
|---|-------------|-------------|-------------|
| C | 0.35495200  | -3.77636900 | 1.06461600  |
| C | -0.97868700 | -3.00390400 | 2.96237000  |
| C | 0.52480800  | -4.12348800 | -0.31607100 |
| C | 1.50121100  | -3.88332500 | 1.92277300  |
| C | 0.18222200  | -3.09143700 | 3.80241900  |
| C | 1.70386500  | -4.62869500 | -0.77617400 |
| H | -0.29342400 | -3.95504100 | -1.00413600 |
| C | 2.73005500  | -4.39185000 | 1.39366200  |
| C | 1.39298500  | -3.52216000 | 3.26328700  |
| C | 2.82224000  | -4.78474900 | 0.09377800  |
| H | 1.81168800  | -4.86671900 | -1.82895900 |
| H | 3.58589400  | -4.46339900 | 2.05937800  |
| H | 2.26593300  | -3.59777300 | 3.90721200  |
| H | 3.75868500  | -5.16278100 | -0.30273700 |
| C | -2.75782700 | 3.21886900  | -1.17081200 |
| C | -2.17272400 | 4.05766800  | -0.19917100 |
| C | -2.23176900 | 3.16685800  | -2.47617100 |
| C | -2.64700800 | 4.13801600  | 1.15094500  |
| C | -1.04086000 | 4.86389100  | -0.55292200 |
| C | -1.07893100 | 3.95361800  | -2.80602000 |
| C | -2.08132500 | 4.99207900  | 2.05097500  |
| H | -3.46703000 | 3.49984300  | 1.45895800  |
| C | -0.45404300 | 5.72136300  | 0.42984400  |
| C | -0.51916000 | 4.78780700  | -1.84223200 |
| C | -0.96631800 | 5.80072000  | 1.68924700  |
| H | -2.47052400 | 5.04198400  | 3.06433700  |
| H | 0.41186100  | 6.31264600  | 0.14316500  |
| H | 0.35487100  | 5.38350800  | -2.09644400 |
| H | -0.52259800 | 6.46768700  | 2.42308100  |
| C | -2.27329000 | -2.29012700 | 4.90448000  |
| H | -3.22064800 | -1.98779600 | 5.34109600  |
| C | -2.20750200 | -2.59545200 | 3.57619600  |
| H | -3.10498700 | -2.54173800 | 2.97102000  |
| C | -1.11665600 | -2.37691300 | 5.73119300  |
| H | -1.19008200 | -2.13682000 | 6.78778300  |
| C | 0.07195300  | -2.76709600 | 5.19189000  |
| H | 0.96520000  | -2.84001700 | 5.80687000  |
| C | -2.25301800 | 2.30820800  | -4.75282800 |
| H | -2.69869000 | 1.67650700  | -5.51497700 |
| C | -1.08673300 | 3.06233200  | -5.06429900 |
| H | -0.65290600 | 2.99365600  | -6.05712700 |
| C | -0.52482400 | 3.86603700  | -4.12130600 |
| H | 0.35940000  | 4.45647400  | -4.34783400 |
| C | -2.80729400 | 2.36232900  | -3.51070300 |

|   |             |             |             |
|---|-------------|-------------|-------------|
| H | -3.69729200 | 1.78260600  | -3.29453700 |
| N | -0.50904500 | -0.93557600 | -0.83759100 |
| S | -0.03507400 | -0.76974200 | -2.34809200 |
| O | 1.16078300  | -1.57700600 | -2.54149700 |
| O | -0.04385200 | 0.60480900  | -2.83575000 |
| C | -1.31771700 | -1.66286900 | -3.36919700 |
| F | -1.70857700 | -2.78104300 | -2.75361200 |
| F | -0.77594100 | -1.98693900 | -4.53922700 |
| F | -2.39280700 | -0.91343700 | -3.59694100 |
| C | -0.18127300 | 1.75703000  | 4.10002600  |
| C | 0.38701700  | 2.85803700  | 3.15631000  |
| H | 0.17798000  | 3.83579500  | 3.61681200  |
| H | -0.20094900 | 2.85591200  | 2.23767400  |
| C | 2.24514200  | 3.19273700  | 1.42020200  |
| C | 1.49173800  | 2.71870800  | 0.33202900  |
| C | 3.44612400  | 3.88035200  | 1.15434200  |
| C | 1.96236900  | 2.85001800  | -0.96851100 |
| H | 0.55281900  | 2.19835400  | 0.48316900  |
| C | 3.88658600  | 4.05548000  | -0.14813100 |
| H | 4.02241000  | 4.30716900  | 1.96886600  |
| C | 3.16008500  | 3.51552100  | -1.20965900 |
| H | 1.38735400  | 2.41868200  | -1.78285100 |
| H | 4.81519600  | 4.58300600  | -0.33642100 |
| H | 3.53485000  | 3.61077400  | -2.22368200 |
| C | 1.84648700  | 2.89600600  | 2.80179300  |
| C | 0.44018200  | 0.36222300  | 3.82142500  |
| H | 1.29664400  | 0.17221300  | 4.46819300  |
| H | -0.31146900 | -0.39895900 | 4.04564400  |
| N | 0.87028700  | 0.17813700  | 2.44695900  |
| C | 2.06165500  | -0.23748700 | 2.02178000  |
| N | 2.15655200  | -0.56630400 | 0.71926000  |
| C | 3.35535800  | -0.60840000 | -0.04021300 |
| C | 4.28207300  | 0.42954700  | 0.01809900  |
| C | 3.55729500  | -1.67520700 | -0.90343000 |
| C | 5.43066400  | 0.36582700  | -0.75896600 |
| C | 4.70523200  | -1.71954100 | -1.68645100 |
| H | 2.80738900  | -2.44950900 | -0.97579300 |
| C | 5.65387200  | -0.70893700 | -1.61464600 |
| H | 6.55151300  | -0.75228700 | -2.22009900 |
| C | 4.94997400  | -2.92020200 | -2.55969800 |
| C | 6.41513700  | 1.50154400  | -0.73125600 |
| F | 3.81557700  | -3.41386100 | -3.07046600 |
| F | 5.77086700  | -2.63542200 | -3.58376100 |
| F | 5.53244400  | -3.91916600 | -1.86130600 |



|   |             |             |             |
|---|-------------|-------------|-------------|
| F | 6.39714200  | 2.15956700  | 0.44065900  |
| F | 7.67265800  | 1.07594000  | -0.93418500 |
| F | 6.15677500  | 2.41162500  | -1.69308200 |
| S | 3.42942100  | -0.30018300 | 3.07946600  |
| H | 4.11051900  | 1.27942400  | 0.66584200  |
| H | 1.28802600  | -0.77612700 | 0.21079900  |
| H | 0.14268800  | 0.37312800  | 1.74493000  |
| C | 2.84083400  | 2.61523500  | 3.74062300  |
| H | 2.58328200  | 2.64064700  | 4.79504800  |
| H | 3.05372900  | 1.32881800  | 3.52066900  |
| H | 3.86097900  | 2.92541200  | 3.51607400  |
| C | -1.70017300 | 1.70385400  | 3.84597000  |
| H | -2.15376100 | 2.68303700  | 4.03685000  |
| H | -2.16750100 | 0.97388600  | 4.51656600  |
| H | -1.92283700 | 1.42143900  | 2.81425800  |
| C | 0.01707200  | 2.06265900  | 5.59369600  |
| H | -0.45344700 | 1.27593400  | 6.19483600  |
| H | -0.45753800 | 3.01326900  | 5.86041800  |
| H | 1.06724900  | 2.10907700  | 5.89418700  |

INT-7

0 imaginary frequencies

H = -4967.768516

G = -4967.955012

E(M06-2X-DCM) = -4968.556560

|   |            |             |             |
|---|------------|-------------|-------------|
| O | 1.50016900 | -2.12966700 | -0.26982700 |
| O | 3.02673700 | -0.09703000 | 0.21522400  |
| P | 1.46821400 | -0.49923300 | -0.06550900 |
| O | 0.68748000 | -0.11093800 | 1.15528700  |
| C | 2.90230600 | -4.47631000 | 2.90739900  |
| C | 3.78719500 | -3.90281300 | 2.00075700  |
| C | 3.31214900 | -3.17630000 | 0.89828200  |
| C | 1.02089700 | -3.52811300 | 1.66014600  |
| C | 1.53222300 | -4.30879800 | 2.71164700  |
| C | 3.98672400 | -0.32254300 | -0.77546500 |
| C | 4.52161300 | -1.60065600 | -0.93334400 |
| C | 5.34560000 | -1.86484000 | -2.03883300 |
| C | 5.72934700 | -0.84186400 | -2.89876100 |
| C | 5.28968600 | 0.45646900  | -2.64290800 |
| C | 4.40349200 | 0.74664700  | -1.59197500 |
| H | 0.82859200 | -4.77263400 | 3.39677400  |
| H | 5.61424400 | 1.27308900  | -3.28089000 |
| C | 4.46833900 | -2.83279200 | -0.03412500 |
| C | 5.65395400 | -2.82253900 | 0.99107800  |

|   |              |              |              |
|---|--------------|--------------|--------------|
| H | 5. 67576400  | -1. 84796400 | 1. 49245200  |
| H | 6. 62483500  | -2. 97059200 | 0. 50852800  |
| H | 6. 73366100  | -3. 51913200 | -1. 81654200 |
| H | 5. 57033100  | -3. 74688600 | -3. 11759400 |
| C | 1. 94374800  | -2. 94174300 | 0. 77089800  |
| H | 3. 26709400  | -5. 05120200 | 3. 75494600  |
| H | 6. 37242400  | -1. 04308200 | -3. 75189300 |
| C | 5. 29980800  | -3. 92434500 | 2. 01215800  |
| H | 5. 71569800  | -3. 73010600 | 3. 00751300  |
| H | 5. 68606600  | -4. 90340300 | 1. 69534600  |
| C | 5. 68959500  | -3. 33724400 | -2. 10801000 |
| C | 4. 70482000  | -3. 95966800 | -1. 09424300 |
| H | 3. 75264200  | -4. 18046600 | -1. 59003500 |
| H | 5. 07129100  | -4. 88770400 | -0. 64401500 |
| C | 3. 99518100  | 2. 16767800  | -1. 36177100 |
| C | 3. 24592200  | 2. 85889500  | -2. 34524900 |
| C | 4. 46062600  | 2. 85177600  | -0. 20998400 |
| C | 2. 71990400  | 2. 21764000  | -3. 51268500 |
| C | 2. 97484800  | 4. 26915400  | -2. 17633200 |
| C | 4. 16426300  | 4. 25729600  | -0. 04654400 |
| C | 2. 01221800  | 2. 91958000  | -4. 45180200 |
| H | 2. 85134000  | 1. 14909400  | -3. 62720000 |
| C | 2. 23878600  | 4. 96579800  | -3. 18532000 |
| C | 3. 43604000  | 4. 92651900  | -1. 03352100 |
| C | 1. 77606400  | 4. 31461300  | -4. 29585600 |
| H | 1. 60190200  | 2. 40051900  | -5. 31300100 |
| H | 2. 05132400  | 6. 02776800  | -3. 04370900 |
| H | 3. 22536200  | 5. 98696900  | -0. 90988600 |
| H | 1. 21219700  | 4. 85267400  | -5. 05315500 |
| C | -0. 46202200 | -3. 38539100 | 1. 52550600  |
| C | -1. 20241500 | -2. 74935600 | 2. 55368000  |
| C | -1. 13566500 | -3. 97402400 | 0. 42671800  |
| C | -0. 58339400 | -2. 11991300 | 3. 68255500  |
| C | -2. 64616400 | -2. 72180700 | 2. 48426200  |
| C | -2. 57819500 | -3. 90974800 | 0. 35358200  |
| C | -1. 32897000 | -1. 55649900 | 4. 68679500  |
| H | 0. 49818400  | -2. 09122100 | 3. 73430500  |
| C | -3. 38712300 | -2. 11590900 | 3. 54786600  |
| C | -3. 29403100 | -3. 29528000 | 1. 38604700  |
| C | -2. 75254100 | -1. 55895600 | 4. 62631400  |
| H | -0. 82904200 | -1. 10720000 | 5. 54158800  |
| H | -4. 47285900 | -2. 12003000 | 3. 48431200  |
| H | -4. 38006300 | -3. 26456700 | 1. 33222000  |
| H | -3. 32987700 | -1. 12392500 | 5. 43854400  |

|   |              |              |              |
|---|--------------|--------------|--------------|
| C | 5. 69293400  | 2. 91612000  | 1. 90419700  |
| H | 6. 29501900  | 2. 41056300  | 2. 65482100  |
| C | 5. 25194700  | 2. 22401200  | 0. 80593900  |
| H | 5. 51332400  | 1. 17810800  | 0. 69390100  |
| C | 5. 38250200  | 4. 29652500  | 2. 06746300  |
| H | 5. 74606000  | 4. 83232900  | 2. 94053000  |
| C | 4. 64290800  | 4. 94377400  | 1. 11383900  |
| H | 4. 41150400  | 6. 00192600  | 1. 21424700  |
| C | -1. 13332500 | -5. 22814400 | -1. 66971300 |
| H | -0. 58673500 | -5. 74629300 | -2. 45288300 |
| C | -2. 55142700 | -5. 13482100 | -1. 75052200 |
| H | -3. 07259000 | -5. 57458500 | -2. 59638300 |
| C | -3. 25194500 | -4. 49713100 | -0. 76345900 |
| H | -4. 33403900 | -4. 41667000 | -0. 81185200 |
| C | -0. 45199200 | -4. 67090300 | -0. 62006100 |
| H | 0. 62711800  | -4. 75679600 | -0. 57513900 |
| C | 0. 84693800  | 2. 54418200  | 3. 77440900  |
| C | 1. 27791000  | 3. 33761600  | 2. 50340800  |
| H | 2. 31303800  | 3. 66511300  | 2. 65388800  |
| H | 1. 29934400  | 2. 64609100  | 1. 65131800  |
| C | 0. 42170400  | 4. 52774900  | 2. 15862600  |
| C | -0. 65138700 | 2. 15275200  | 3. 72189500  |
| H | -1. 24547800 | 3. 06455700  | 3. 82959300  |
| H | -0. 87548300 | 1. 49219900  | 4. 57120200  |
| N | -1. 07383600 | 1. 49240500  | 2. 47539600  |
| C | -2. 30397100 | 1. 48321200  | 1. 99011300  |
| N | -2. 56845900 | 0. 97842200  | 0. 77968700  |
| C | -3. 84585000 | 0. 95658200  | 0. 14257700  |
| C | -4. 56332100 | 2. 13709500  | -0. 06912600 |
| C | -4. 33958600 | -0. 26192900 | -0. 32546400 |
| C | -5. 81017800 | 2. 08297000  | -0. 69157600 |
| C | -5. 58241100 | -0. 29806100 | -0. 95873300 |
| H | -3. 75148800 | -1. 16325300 | -0. 19787100 |
| C | -6. 32887600 | 0. 86609600  | -1. 13438200 |
| H | -7. 29853900 | 0. 82750100  | -1. 61524000 |
| C | -6. 11272000 | -1. 63056900 | -1. 42610200 |
| C | -6. 57077300 | 3. 35836700  | -0. 95364700 |
| F | -7. 30539800 | -1. 51664700 | -2. 04293500 |
| F | -6. 28289500 | -2. 48335400 | -0. 38097700 |
| F | -5. 26226800 | -2. 23186100 | -2. 27967300 |
| F | -7. 90494700 | 3. 15475600  | -0. 91197100 |
| F | -6. 28391000 | 3. 86736200  | -2. 16995300 |
| F | -6. 27230000 | 4. 31039200  | -0. 04237000 |
| S | -3. 68372100 | 2. 14145500  | 2. 90975000  |

|   |             |             |             |
|---|-------------|-------------|-------------|
| H | -4.15045300 | 3.09359000  | 0.23142100  |
| H | -1.82323900 | 0.50415600  | 0.23272500  |
| H | -0.36281600 | 0.93429900  | 1.95141500  |
| C | 0.79764400  | 5.80308900  | 2.27354200  |
| H | 1.78732100  | 6.07373600  | 2.63577300  |
| H | -3.10543900 | 1.97614300  | 4.11361100  |
| H | 0.14037900  | 6.62259600  | 1.99428400  |
| N | 1.10833700  | 0.11321800  | -1.51009400 |
| S | -0.33720400 | 0.09616600  | -2.15346400 |
| O | -0.64987900 | 1.33320600  | -2.86982000 |
| O | -1.39080000 | -0.44312400 | -1.24103800 |
| C | -0.20273200 | -1.20348900 | -3.48776600 |
| F | 0.72497800  | -0.83676400 | -4.38250400 |
| F | -1.37850900 | -1.32787700 | -4.11356300 |
| F | 0.14141900  | -2.38540300 | -2.96924800 |
| C | 1.74592400  | 1.30256100  | 3.92742100  |
| H | 1.50350200  | 0.75942200  | 4.85009100  |
| H | 1.65218100  | 0.61591900  | 3.08258600  |
| H | 2.79571400  | 1.61144000  | 3.98805400  |
| C | 1.00522100  | 3.42942300  | 5.02779000  |
| H | 0.66094700  | 2.90760600  | 5.92980000  |
| H | 2.06104000  | 3.68072900  | 5.17613200  |
| H | 0.44829200  | 4.36798200  | 4.93594300  |
| H | -0.57524900 | 4.31471800  | 1.76891900  |

INT-7'

0 imaginary frequencies

H = -4967.786356

G = -4967.970063

E(M06-2X-DCM) = -4968.564088

|   |             |             |             |
|---|-------------|-------------|-------------|
| C | 0.75144900  | -3.06305400 | -4.21769600 |
| C | 0.47246000  | -1.79296600 | -5.07908200 |
| H | 1.34768100  | -1.63107100 | -5.72241000 |
| H | -0.36741500 | -2.02708800 | -5.75087400 |
| C | 0.15731000  | -0.49804700 | -4.37644400 |
| C | -0.50816300 | -3.56838200 | -3.47320200 |
| H | -0.29368300 | -4.56150200 | -3.05079000 |
| H | -1.33198100 | -3.70198400 | -4.17939000 |
| N | -0.97535000 | -2.68427800 | -2.41330600 |
| C | -2.21512000 | -2.75619300 | -1.85521400 |
| N | -2.32409600 | -1.91655500 | -0.76351400 |
| C | -3.38105300 | -1.64188200 | 0.11004800  |
| C | -4.74210600 | -1.82586600 | -0.18289100 |
| C | -3.02665600 | -1.08508500 | 1.35161200  |

|   |             |             |             |
|---|-------------|-------------|-------------|
| C | -5.70425100 | -1.46926900 | 0.76183600  |
| C | -4.00327200 | -0.73619300 | 2.27972700  |
| H | -1.97950300 | -0.92192100 | 1.58515400  |
| C | -5.35577600 | -0.93113300 | 2.00083000  |
| H | -6.11645800 | -0.67253100 | 2.72724200  |
| C | -3.59241700 | -0.06598500 | 3.55986500  |
| C | -7.16237000 | -1.57328100 | 0.39811800  |
| F | -4.49146100 | -0.24518100 | 4.54756000  |
| F | -3.45626400 | 1.28211300  | 3.39857500  |
| F | -2.39537800 | -0.51144000 | 4.01248300  |
| F | -7.61501500 | -0.41082000 | -0.14447500 |
| F | -7.93479700 | -1.81728000 | 1.48054500  |
| F | -7.40137600 | -2.54409500 | -0.50275600 |
| S | -3.42904000 | -3.76628500 | -2.44283400 |
| C | 1.14411100  | -4.19316200 | -5.19429300 |
| H | 2.03430700  | -3.91622300 | -5.77048800 |
| H | 1.36988100  | -5.12016200 | -4.65464300 |
| H | 0.33639600  | -4.40619100 | -5.90494800 |
| C | 1.92882600  | -2.81927100 | -3.25526800 |
| H | 2.14921400  | -3.71858600 | -2.66995100 |
| H | 2.83167700  | -2.55423600 | -3.81906200 |
| H | 1.74191300  | -2.00351700 | -2.54964900 |
| H | -5.03362800 | -2.24694200 | -1.13423700 |
| C | 0.90510100  | 0.60902100  | -4.46810000 |
| H | -1.45492900 | -1.45380500 | -0.49755400 |
| H | 1.83211600  | 0.62848700  | -5.03846200 |
| H | 0.59061600  | 1.55341100  | -4.03263800 |
| H | -0.26190500 | -2.19405000 | -1.88204700 |
| H | 1.63253600  | 0.73170000  | -2.21744700 |
| O | -0.07268800 | 1.44410800  | 0.52754600  |
| O | 2.19514600  | 0.32149300  | 1.11605300  |
| P | 1.04267200  | 0.41260900  | -0.00303900 |
| O | 0.36128300  | -0.84016400 | -0.41455200 |
| C | 0.96859500  | 5.40143400  | 1.42555700  |
| C | 1.29694300  | 4.37359900  | 2.30237900  |
| C | 0.85610900  | 3.06261800  | 2.06375400  |
| C | -0.18716100 | 3.80287700  | -0.02386400 |
| C | 0.19415700  | 5.11594300  | 0.30190400  |
| C | 1.84123900  | -0.17493400 | 2.39746100  |
| C | 1.26895800  | 0.69874700  | 3.31830800  |
| C | 0.79561600  | 0.17540600  | 4.53395600  |
| C | 0.97567700  | -1.16557700 | 4.85194600  |
| C | 1.62995500  | -1.99737900 | 3.94532900  |
| C | 2.06275500  | -1.53318700 | 2.69225400  |

|   |             |             |             |
|---|-------------|-------------|-------------|
| H | -0.10948600 | 5.91811100  | -0.36358800 |
| H | 1.79501300  | -3.04272700 | 4.18826200  |
| C | 1.09732100  | 2.21530600  | 3.30949400  |
| C | 2.35046600  | 2.94377000  | 3.89845800  |
| H | 2.48291300  | 2.74615700  | 4.96660800  |
| H | 3.24505000  | 2.58743900  | 3.37515000  |
| H | -0.85399900 | 0.88379400  | 5.75798100  |
| H | 0.71198800  | 1.57806200  | 6.18229100  |
| C | 0.21099400  | 2.78536200  | 0.86335500  |
| H | 1.29554500  | 6.42018400  | 1.61681800  |
| H | 0.60965700  | -1.56527400 | 5.79388200  |
| C | 2.11533200  | 4.43609300  | 3.57395500  |
| H | 1.56624400  | 4.94181300  | 4.38000800  |
| H | 3.05168100  | 4.98814200  | 3.43620500  |
| C | 0.09180400  | 1.24239500  | 5.33966200  |
| C | -0.11101700 | 2.36135100  | 4.29905300  |
| H | -0.16674300 | 3.36148300  | 4.73836100  |
| H | -1.04398400 | 2.18237900  | 3.75506300  |
| C | 2.75101400  | -2.49340900 | 1.77100600  |
| C | 4.15996500  | -2.44320600 | 1.63880700  |
| C | 2.00886700  | -3.51715300 | 1.13465400  |
| C | 4.97229300  | -1.49131400 | 2.33415800  |
| C | 4.83204500  | -3.41269700 | 0.80357600  |
| C | 2.69783400  | -4.49512100 | 0.32217100  |
| C | 6.33559800  | -1.47795700 | 2.19308100  |
| H | 4.49276100  | -0.77180500 | 2.98877800  |
| C | 6.25449000  | -3.35334100 | 0.67030500  |
| C | 4.08368100  | -4.40658000 | 0.16685500  |
| C | 6.98925100  | -2.41419200 | 1.34255300  |
| H | 6.92720100  | -0.74568100 | 2.73590100  |
| H | 6.74146300  | -4.08383600 | 0.02863500  |
| H | 4.59606800  | -5.14188000 | -0.45039400 |
| H | 8.07037900  | -2.38434200 | 1.23892900  |
| C | -1.01860200 | 3.55221700  | -1.24250700 |
| C | -2.34507300 | 3.06823300  | -1.10260100 |
| C | -0.51245800 | 3.88237500  | -2.52593900 |
| C | -2.94676700 | 2.78652500  | 0.16545900  |
| C | -3.16012800 | 2.86926600  | -2.28057500 |
| C | -1.35474700 | 3.71236800  | -3.69011000 |
| C | -4.22767200 | 2.30876200  | 0.25921100  |
| H | -2.37947000 | 2.96168900  | 1.07217300  |
| C | -4.48548200 | 2.34985500  | -2.13961600 |
| C | -2.64505800 | 3.19887200  | -3.53665600 |
| C | -5.00755500 | 2.06715400  | -0.90691000 |

|   |             |             |             |
|---|-------------|-------------|-------------|
| H | -4.64773100 | 2.10241300  | 1.23778500  |
| H | -5.06991400 | 2.18422100  | -3.04144300 |
| H | -3.26792600 | 3.05907300  | -4.41782300 |
| H | -6.00504900 | 1.64924900  | -0.80895500 |
| C | -0.09753100 | -4.66041200 | 0.64808200  |
| H | -1.17601500 | -4.73043400 | 0.75613900  |
| C | 0.58723400  | -3.64370000 | 1.26106100  |
| H | 0.04877600  | -2.91572800 | 1.85666900  |
| C | 0.58853800  | -5.62731200 | -0.14210900 |
| H | 0.02718000  | -6.42791700 | -0.61531000 |
| C | 1.94572300  | -5.54158200 | -0.29995200 |
| H | 2.48277600  | -6.27437100 | -0.89787300 |
| C | 1.26842900  | 4.69022200  | -3.99662100 |
| H | 2.28725000  | 5.04365800  | -4.12555100 |
| C | 0.42430600  | 4.54721700  | -5.13358600 |
| H | 0.79797000  | 4.80987400  | -6.11936000 |
| C | -0.84773800 | 4.06568000  | -4.98002500 |
| H | -1.50044800 | 3.93646400  | -5.84004700 |
| C | 0.81804200  | 4.37009700  | -2.74153000 |
| H | 1.48334300  | 4.47894800  | -1.89314700 |
| N | 1.92981000  | 1.05652700  | -1.28852700 |
| S | 3.34142300  | 1.97618200  | -1.35619100 |
| C | 4.71232300  | 0.76383600  | -0.86856500 |
| O | 3.32005000  | 3.00252000  | -0.32529900 |
| O | 3.54678200  | 2.26010400  | -2.76993700 |
| F | 4.34458000  | -0.48438800 | -1.15224000 |
| F | 5.79378300  | 1.08423500  | -1.57615500 |
| F | 4.97354900  | 0.88693300  | 0.42536500  |
| H | -0.77309600 | -0.46212300 | -3.81204700 |

TS-EF-2S

l imaginary frequencies

H = -4967.753505

G = -4967.933851

E(M06-2X-DCM) = -4968.529806

|   |             |             |             |
|---|-------------|-------------|-------------|
| O | 3.10693300  | 0.50955400  | -0.69800300 |
| O | 1.24438400  | 2.17331200  | 0.00681100  |
| P | 1.52508100  | 0.58638400  | -0.28374200 |
| O | 0.73699800  | 0.05347300  | -1.44095300 |
| N | 1.43494900  | -0.14463100 | 1.15817400  |
| S | 0.10103500  | -0.33700500 | 1.97807900  |
| C | 0.32389700  | 0.76696500  | 3.46832700  |
| F | -0.76030200 | 0.68435900  | 4.24544400  |
| F | 1.39329200  | 0.38109200  | 4.18024300  |

|   |             |             |             |
|---|-------------|-------------|-------------|
| F | 0.49501400  | 2.03269200  | 3.08423700  |
| O | -0.01443000 | -1.69685300 | 2.53144800  |
| O | -1.11817400 | 0.21848700  | 1.32365000  |
| C | 1.65402400  | 4.70787800  | -3.30251600 |
| C | 2.75861200  | 4.35660500  | -2.53339700 |
| C | 2.60288900  | 3.57298900  | -1.38088400 |
| C | 0.20346400  | 3.42213500  | -1.80406900 |
| C | 0.38962100  | 4.26575200  | -2.91358500 |
| C | 4.08857200  | 0.96953100  | 0.18312300  |
| C | 4.34372900  | 2.33882600  | 0.27505900  |
| C | 5.21042500  | 2.80649000  | 1.27613900  |
| C | 5.89867200  | 1.91821900  | 2.09466000  |
| C | 5.72765700  | 0.54892900  | 1.89821200  |
| C | 4.82071200  | 0.04260400  | 0.95212600  |
| H | -0.48409900 | 4.55668200  | -3.48921200 |
| H | 6.29240800  | -0.15838500 | 2.49836200  |
| C | 3.91688900  | 3.50594800  | -0.61348600 |
| C | 4.93210300  | 3.72017000  | -1.78782600 |
| H | 5.90300300  | 4.08617800  | -1.43968100 |
| H | 5.09730100  | 2.75929700  | -2.28894400 |
| H | 5.16044900  | 4.72722700  | 2.30789300  |
| H | 6.18224700  | 4.70298300  | 0.87477100  |
| C | 1.34681000  | 3.06127400  | -1.06634100 |
| H | 1.76691900  | 5.32326900  | -4.19159600 |
| H | 6.57256000  | 2.28009300  | 2.86706900  |
| C | 4.21777800  | 4.69303600  | -2.75191600 |
| H | 4.42845500  | 5.74016500  | -2.49265900 |
| H | 4.52891400  | 4.55943400  | -3.79435000 |
| C | 5.24148700  | 4.31915500  | 1.29393300  |
| C | 4.03560600  | 4.68903800  | 0.40488100  |
| H | 4.14107400  | 5.65837300  | -0.09224200 |
| H | 3.12390000  | 4.72178800  | 1.01224900  |
| C | 4.74535400  | -1.44262300 | 0.77041800  |
| C | 5.29142200  | -2.03082800 | -0.39894200 |
| C | 4.26117900  | -2.26408100 | 1.81785900  |
| C | 5.82373900  | -1.26033400 | -1.48280900 |
| C | 5.35619700  | -3.47141300 | -0.51120500 |
| C | 4.34566100  | -3.70306900 | 1.69888000  |
| C | 6.35318000  | -1.85893100 | -2.59633200 |
| H | 5.80911900  | -0.17900600 | -1.41220600 |
| C | 5.91628800  | -4.05679000 | -1.69060600 |
| C | 4.89029700  | -4.26616500 | 0.54111500  |
| C | 6.39813500  | -3.27769200 | -2.70813200 |
| H | 6.74831700  | -1.24643500 | -3.40227400 |



|   |             |             |             |
|---|-------------|-------------|-------------|
| H | 5.95826400  | -5.14192800 | -1.75534700 |
| H | 4.96565700  | -5.34945900 | 0.46157200  |
| H | 6.82403200  | -3.73548700 | -3.59693800 |
| C | -1.18125100 | 2.98450100  | -1.44667400 |
| C | -1.77674700 | 3.43245000  | -0.24098800 |
| C | -1.92826300 | 2.19755600  | -2.35882300 |
| C | -1.08826900 | 4.24756400  | 0.71353300  |
| C | -3.14783500 | 3.08066200  | 0.05093600  |
| C | -3.31678100 | 1.90502600  | -2.08123200 |
| C | -1.68694800 | 4.64050900  | 1.88159600  |
| H | -0.07156000 | 4.55779500  | 0.50306800  |
| C | -3.73285400 | 3.50008100  | 1.28677200  |
| C | -3.88536600 | 2.34950800  | -0.88456900 |
| C | -3.02316700 | 4.25270800  | 2.18232200  |
| H | -1.13611900 | 5.25350800  | 2.59000300  |
| H | -4.75042900 | 3.18959300  | 1.50722000  |
| H | -4.92720100 | 2.11771900  | -0.67378500 |
| H | -3.47544700 | 4.55938800  | 3.12146200  |
| C | 3.21002400  | -2.54755400 | 4.00424700  |
| H | 2.73612800  | -2.11241200 | 4.87890100  |
| C | 3.66774200  | -1.72920400 | 3.00583800  |
| H | 3.54638500  | -0.65744500 | 3.09036800  |
| C | 3.32041400  | -3.96273700 | 3.89388200  |
| H | 2.95704000  | -4.59491000 | 4.69969800  |
| C | 3.86885500  | -4.52130900 | 2.77118000  |
| H | 3.95216800  | -5.60131300 | 2.67090700  |
| C | -2.12431700 | 0.92218300  | -4.43642400 |
| H | -1.66954300 | 0.52106700  | -5.33868900 |
| C | -3.50481800 | 0.67984700  | -4.18046000 |
| H | -4.09446300 | 0.11319000  | -4.89645800 |
| C | -4.07986100 | 1.15412900  | -3.03183900 |
| H | -5.12813300 | 0.96160500  | -2.81560700 |
| C | -1.36485600 | 1.65211900  | -3.55875200 |
| H | -0.31120200 | 1.80776000  | -3.75647200 |
| C | 1.11624200  | -3.55579100 | -2.34254500 |
| C | 1.36094200  | -3.59956500 | -0.79808700 |
| H | 2.19101300  | -4.30044900 | -0.61190500 |
| H | 1.72430700  | -2.62322900 | -0.46913400 |
| C | 0.24289000  | -3.98958300 | 0.10813600  |
| C | -0.30017700 | -2.98128000 | -2.67299900 |
| H | -0.99498200 | -3.78614200 | -2.91077000 |
| H | -0.22102600 | -2.33872700 | -3.55791100 |
| N | -0.92002500 | -2.17454400 | -1.61570000 |
| C | -2.18790200 | -2.31215300 | -1.18622200 |

|   |             |             |             |
|---|-------------|-------------|-------------|
| N | -2.69031700 | -1.30441600 | -0.44198800 |
| C | -4.02005000 | -1.15193500 | 0.02079000  |
| C | -5.11129000 | -1.39611100 | -0.81481300 |
| C | -4.22574400 | -0.64466000 | 1.31063700  |
| C | -6.40531400 | -1.15430800 | -0.35271100 |
| C | -5.52501200 | -0.40786100 | 1.75468200  |
| H | -3.37328200 | -0.42544500 | 1.94324600  |
| C | -6.62465900 | -0.66560200 | 0.93276300  |
| H | -7.63229700 | -0.48395700 | 1.28724500  |
| C | -5.76438400 | 0.19124300  | 3.11633400  |
| C | -7.55150900 | -1.33271800 | -1.31193300 |
| F | -6.03971200 | 1.51790100  | 3.02750400  |
| F | -4.70187300 | 0.05755000  | 3.93015400  |
| F | -6.82707900 | -0.37958100 | 3.72656200  |
| F | -7.42858200 | -2.46481400 | -2.03657000 |
| F | -7.60347400 | -0.30661200 | -2.20056000 |
| F | -8.74333600 | -1.37334100 | -0.68355500 |
| S | -3.05212000 | -3.80146500 | -1.43242100 |
| H | -4.95622800 | -1.74027200 | -1.82938400 |
| H | -2.02461800 | -0.61957500 | -0.05676700 |
| H | -0.43561400 | -1.26976300 | -1.44894700 |
| C | 1.23163200  | -4.94963200 | -2.99415400 |
| H | 2.23332000  | -5.36604400 | -2.83991300 |
| H | 0.50027800  | -5.66525600 | -2.60485700 |
| H | 1.06966300  | -4.87676500 | -4.07648600 |
| C | 2.20823700  | -2.65088100 | -2.95188400 |
| H | 2.11746400  | -1.62173500 | -2.59426700 |
| H | 3.20792600  | -3.01913600 | -2.69938500 |
| H | 2.12290500  | -2.64351000 | -4.04569900 |
| C | -0.63352500 | -5.06378200 | -0.02752400 |
| H | -0.37777700 | -5.87397000 | -0.70954200 |
| H | -1.66038900 | -4.54402300 | -0.66469700 |
| H | -1.15893100 | -5.37822900 | 0.87537900  |
| H | 0.10692200  | -3.34845700 | 0.98195800  |

TS-EF-2S-1

l imaginary frequencies

H = -4967.750498

G = -4967.929329

E(M06-2X-DCM) = -4968.524649

|   |            |             |            |
|---|------------|-------------|------------|
| O | 2.63186200 | 0.61956000  | 0.51169300 |
| O | 0.44245300 | 1.98686700  | 0.34540800 |
| O | 0.23245200 | -0.46448300 | 0.75658500 |
| C | 3.53467600 | 1.81932200  | 4.41683100 |

|   |              |              |              |
|---|--------------|--------------|--------------|
| C | 3. 32444800  | 2. 76509300  | 3. 41899400  |
| C | 3. 06117500  | 2. 37495600  | 2. 09528700  |
| C | 3. 16381300  | 0. 03207500  | 2. 79501700  |
| C | 3. 46947700  | 0. 46369100  | 4. 09480700  |
| C | 0. 85736200  | 3. 12774400  | -0. 34706600 |
| C | 2. 07364000  | 3. 72452700  | -0. 03328700 |
| C | 2. 58393100  | 4. 70749800  | -0. 89488200 |
| C | 1. 81448300  | 5. 19729600  | -1. 94455000 |
| C | 0. 52280300  | 4. 70083200  | -2. 13256300 |
| C | 0. 02235400  | 3. 64490000  | -1. 35624900 |
| H | 3. 64067700  | -0. 28598100 | 4. 86198500  |
| H | -0. 10697800 | 5. 11166100  | -2. 91643300 |
| C | 2. 98494000  | 3. 60071100  | 1. 18651700  |
| C | 2. 59288800  | 4. 69459400  | 2. 24328400  |
| H | 1. 50764300  | 4. 66117100  | 2. 39417800  |
| H | 2. 85119200  | 5. 70444400  | 1. 91184000  |
| H | 4. 06351000  | 6. 06910200  | -0. 06183400 |
| H | 4. 67998700  | 5. 05638400  | -1. 36396300 |
| C | 2. 94718200  | 1. 01628300  | 1. 81187000  |
| H | 3. 74119100  | 2. 12828200  | 5. 43837400  |
| H | 2. 20437100  | 5. 96444000  | -2. 60862600 |
| C | 3. 30580600  | 4. 27136400  | 3. 54213900  |
| H | 2. 78743700  | 4. 61547100  | 4. 44422500  |
| H | 4. 32654000  | 4. 67672200  | 3. 58910500  |
| C | 4. 00319200  | 5. 06414300  | -0. 50235200 |
| C | 4. 35621200  | 3. 96865800  | 0. 53310400  |
| H | 4. 74665000  | 3. 08458400  | 0. 01660000  |
| H | 5. 10014800  | 4. 29030400  | 1. 26940100  |
| C | -1. 36974200 | 3. 12932600  | -1. 55603200 |
| C | -1. 72217300 | 2. 42912900  | -2. 73525200 |
| C | -2. 34848200 | 3. 37996400  | -0. 56013600 |
| C | -0. 78090500 | 2. 14617300  | -3. 77712800 |
| C | -3. 07795200 | 1. 95201000  | -2. 90613500 |
| C | -3. 69398500 | 2. 88287300  | -0. 73670500 |
| C | -1. 15004300 | 1. 45824900  | -4. 90397300 |
| H | 0. 24564800  | 2. 47239900  | -3. 66003200 |
| C | -3. 42220700 | 1. 24430900  | -4. 10096400 |
| C | -4. 02181700 | 2. 18187000  | -1. 90125300 |
| C | -2. 48944800 | 1. 00499100  | -5. 07451000 |
| H | -0. 40655500 | 1. 24552100  | -5. 66637500 |
| H | -4. 44873600 | 0. 90390300  | -4. 21898300 |
| H | -5. 03644400 | 1. 80803600  | -2. 02384200 |
| H | -2. 76600100 | 0. 46866600  | -5. 97866700 |
| C | 3. 09652800  | -1. 43418200 | 2. 49592300  |

|   |              |              |              |
|---|--------------|--------------|--------------|
| C | 2. 01520200  | -2. 20804000 | 2. 98134000  |
| C | 4. 14871400  | -2. 05058800 | 1. 77607300  |
| C | 0. 91801900  | -1. 64063200 | 3. 70778100  |
| C | 1. 98891800  | -3. 63229000 | 2. 73221800  |
| C | 4. 10317100  | -3. 47257600 | 1. 52148900  |
| C | -0. 11191100 | -2. 41747000 | 4. 17114600  |
| H | 0. 90348900  | -0. 57054600 | 3. 87752600  |
| C | 0. 89648700  | -4. 40889600 | 3. 23517000  |
| C | 3. 02678900  | -4. 22278900 | 2. 00514200  |
| C | -0. 12304400 | -3. 82319400 | 3. 93649500  |
| H | -0. 93514900 | -1. 96004400 | 4. 71102900  |
| H | 0. 90170700  | -5. 48150200 | 3. 05309800  |
| H | 3. 00426700  | -5. 29596800 | 1. 82368300  |
| H | -0. 94440000 | -4. 42391700 | 4. 31822900  |
| C | -3. 04024600 | 4. 35284700  | 1. 57416900  |
| H | -2. 80241100 | 4. 93085400  | 2. 46328600  |
| C | -2. 07422600 | 4. 13206600  | 0. 62753800  |
| H | -1. 08060900 | 4. 54157400  | 0. 76927300  |
| C | -4. 35528100 | 3. 83386100  | 1. 40732000  |
| H | -5. 10559800 | 4. 01120800  | 2. 17323000  |
| C | -4. 67012400 | 3. 12192500  | 0. 28162000  |
| H | -5. 66793700 | 2. 71563500  | 0. 14053400  |
| C | 6. 29139700  | -1. 95115500 | 0. 60579800  |
| H | 7. 14265000  | -1. 37578700 | 0. 25235000  |
| C | 6. 23345100  | -3. 34941800 | 0. 34380300  |
| H | 7. 03893900  | -3. 82752900 | -0. 20703400 |
| C | 5. 16984700  | -4. 08515000 | 0. 79207600  |
| H | 5. 11909100  | -5. 15605400 | 0. 60824400  |
| C | 5. 28714500  | -1. 32628900 | 1. 29755000  |
| H | 5. 34808200  | -0. 26124700 | 1. 48982400  |
| C | 0. 49446800  | -3. 85814400 | -3. 44434700 |
| C | 1. 19952600  | -4. 01812600 | -2. 05389700 |
| H | 1. 73099400  | -4. 98045200 | -2. 07857200 |
| H | 1. 95629000  | -3. 23726800 | -1. 95457700 |
| C | 0. 32873800  | -3. 99088400 | -0. 83677900 |
| C | -0. 43723400 | -2. 59170600 | -3. 46082500 |
| H | -1. 37398400 | -2. 83119700 | -3. 96643600 |
| H | 0. 06280000  | -1. 78647800 | -4. 00287300 |
| N | -0. 76334500 | -1. 99869900 | -2. 15361400 |
| C | -1. 93324800 | -2. 06911000 | -1. 49805400 |
| N | -2. 08827400 | -1. 23165900 | -0. 45456600 |
| C | -3. 21466700 | -1. 07734100 | 0. 38433500  |
| C | -4. 51408800 | -0. 99162000 | -0. 12089200 |
| C | -2. 98301700 | -0. 90996400 | 1. 75414300  |

|   |             |             |             |
|---|-------------|-------------|-------------|
| C | -5.57734800 | -0.76147100 | 0.75126100  |
| C | -4.05880400 | -0.68616800 | 2.61228300  |
| H | -1.96630900 | -0.94754700 | 2.13248600  |
| C | -5.36254800 | -0.61269800 | 2.12125500  |
| H | -6.19345700 | -0.43020800 | 2.79092600  |
| C | -3.79858300 | -0.58005400 | 4.09237500  |
| C | -6.95511600 | -0.58858900 | 0.16957400  |
| F | -2.67135600 | 0.11634300  | 4.35505000  |
| F | -3.63436500 | -1.80472400 | 4.65407900  |
| F | -4.81396700 | 0.02061500  | 4.74603700  |
| F | -7.21978900 | -1.51649800 | -0.77388900 |
| F | -7.08708100 | 0.62286400  | -0.43632400 |
| F | -7.92009500 | -0.66666500 | 1.10685000  |
| S | -3.03698500 | -3.37502000 | -1.82762500 |
| H | -4.69283800 | -1.07560500 | -1.18530800 |
| H | -1.22190300 | -0.78503500 | -0.08491200 |
| H | -0.11957200 | -1.22435200 | -1.89389900 |
| C | -0.30733700 | -5.11766300 | -3.83481600 |
| H | 0.32561200  | -6.01221200 | -3.79487700 |
| H | -1.18344500 | -5.28099700 | -3.20421000 |
| H | -0.67035700 | -5.02003300 | -4.86466500 |
| C | 1.60616900  | -3.65999600 | -4.49696700 |
| H | 2.20905400  | -2.77247000 | -4.28428500 |
| H | 2.26525000  | -4.53545700 | -4.53510600 |
| H | 1.16873000  | -3.53324500 | -5.49440400 |
| C | -0.69770700 | -4.87877800 | -0.54837400 |
| H | -0.73177400 | -5.83353300 | -1.07257000 |
| H | -1.77236800 | -4.29020700 | -1.16335400 |
| H | -1.07019200 | -4.89548500 | 0.47574900  |
| H | 0.52194300  | -3.19787400 | -0.11574100 |
| N | 1.18043700  | 0.13910300  | -1.55814900 |
| S | 2.25937300  | 0.47712400  | -2.69658700 |
| O | 1.83662800  | -0.22803900 | -3.91838300 |
| O | 2.66889600  | 1.88273100  | -2.79047500 |
| C | 3.84481900  | -0.42747900 | -2.20502100 |
| F | 4.50073000  | -0.77717100 | -3.31763700 |
| F | 4.63864600  | 0.34874900  | -1.46601700 |
| F | 3.56280500  | -1.54587400 | -1.51236800 |
| P | 1.08574700  | 0.52108200  | 0.01274100  |

TS-EF-2R

l imaginary frequencies

H = -4967.751444

G = -4967.932684

E(M06-2X-DCM) = -4968.525651

|   |             |             |             |
|---|-------------|-------------|-------------|
| O | 0.24693300  | -2.29713500 | -0.02968200 |
| O | 2.56625800  | -1.16669300 | -0.15824400 |
| P | 0.98062600  | -0.84874200 | 0.10696300  |
| O | 0.39550200  | 0.04725500  | -0.94119800 |
| N | 0.89321100  | -0.45142200 | 1.67323300  |
| S | 1.50861200  | 0.83850200  | 2.32930700  |
| C | 3.07543700  | 0.25209300  | 3.16379900  |
| F | 3.64754100  | 1.27998600  | 3.80439300  |
| F | 2.78278000  | -0.70233500 | 4.05524000  |
| F | 3.93842100  | -0.23661200 | 2.27097200  |
| C | 0.98480500  | 5.59769500  | 1.39086500  |
| C | 0.59208200  | 4.78384000  | 2.66629200  |
| H | 1.33889300  | 4.00363200  | 2.82848600  |
| H | 0.64969600  | 5.47621800  | 3.51967300  |
| C | -0.75455100 | 4.13500500  | 2.68553800  |
| C | 0.75211400  | 4.74935200  | 0.09154700  |
| H | 1.71819800  | 4.42287700  | -0.30421200 |
| H | 0.26413900  | 5.36211600  | -0.66826700 |
| N | -0.02937300 | 3.51208300  | 0.24464800  |
| C | -1.22413800 | 3.25543700  | -0.33847900 |
| N | -1.46357900 | 1.98498300  | -0.68638300 |
| C | -2.68021800 | 1.41944900  | -1.15719700 |
| C | -3.88325000 | 1.53596900  | -0.45961400 |
| C | -2.61183300 | 0.64287600  | -2.31776400 |
| C | -5.02424100 | 0.90107200  | -0.95043000 |
| C | -3.75986000 | 0.01443100  | -2.79538200 |
| H | -1.66316200 | 0.53563700  | -2.83114000 |
| C | -4.97382300 | 0.14558400  | -2.12142600 |
| H | -5.86342900 | -0.34708600 | -2.49444000 |
| C | -3.67931900 | -0.86515900 | -4.01611400 |
| C | -6.32765900 | 1.05408200  | -0.21194800 |
| F | -3.45728300 | -2.15626800 | -3.68959600 |
| F | -2.67829300 | -0.48660600 | -4.84330400 |
| F | -4.82847900 | -0.83080700 | -4.72774400 |
| F | -7.15233000 | 0.00223900  | -0.42314600 |
| F | -6.99820700 | 2.16260600  | -0.59538900 |
| F | -6.13673600 | 1.15389000  | 1.12455900  |
| S | -2.38959200 | 4.53131200  | -0.48080400 |
| H | -3.92693600 | 2.09638000  | 0.46501100  |
| C | -1.98079000 | 4.77269400  | 2.53703000  |
| H | -0.65598500 | 1.31976500  | -0.73646200 |
| H | -2.15985800 | 4.74290200  | 1.20589900  |
| H | -2.86837400 | 4.22493300  | 2.85454000  |

|   |             |             |             |
|---|-------------|-------------|-------------|
| O | 0.68338300  | 1.33907800  | 3.44183700  |
| H | 0.56925800  | 2.70516300  | 0.47671600  |
| O | 1.97939300  | 1.87198100  | 1.35970100  |
| H | -2.03520900 | 5.85151700  | 2.68107200  |
| C | 3.62161100  | -2.91222900 | -3.81513400 |
| C | 3.22950300  | -3.69979400 | -2.73774500 |
| C | 2.93025000  | -3.11893100 | -1.49591500 |
| C | 3.34263600  | -0.90555400 | -2.44394900 |
| C | 3.69443800  | -1.52902000 | -3.65289400 |
| C | 0.54579700  | -3.31138500 | 0.88235300  |
| C | 1.71152100  | -4.05833900 | 0.72537300  |
| C | 2.10014700  | -4.93320800 | 1.75244600  |
| C | 1.26939700  | -5.15754100 | 2.84531100  |
| C | 0.03824300  | -4.50273600 | 2.90891100  |
| C | -0.34542700 | -3.55598100 | 1.94547700  |
| H | 4.00550300  | -0.90266900 | -4.48401100 |
| H | -0.63850800 | -4.70195500 | 3.73463200  |
| C | 2.66907500  | -4.20480200 | -0.45618800 |
| C | 2.20089000  | -5.37171700 | -1.39446700 |
| H | 2.31936900  | -6.35488000 | -0.92899400 |
| H | 1.13680700  | -5.23508600 | -1.61918600 |
| H | 4.13124800  | -5.46914100 | 2.33864100  |
| H | 3.40596000  | -6.56923700 | 1.17213900  |
| C | 2.94703700  | -1.73084900 | -1.37399100 |
| H | 3.86110900  | -3.36254900 | -4.77515300 |
| H | 1.56439500  | -5.84200900 | 3.63680400  |
| C | 3.02806300  | -5.19776400 | -2.68515300 |
| H | 3.98959700  | -5.72643800 | -2.61873200 |
| H | 2.51596000  | -5.58577900 | -3.57295700 |
| C | 3.46994300  | -5.51207200 | 1.46559100  |
| C | 3.97113300  | -4.63191500 | 0.29764800  |
| H | 4.68496700  | -5.14294800 | -0.35636900 |
| H | 4.46003700  | -3.73389200 | 0.69236400  |
| C | -1.67527300 | -2.87678500 | 2.04293100  |
| C | -2.66748100 | -3.14208000 | 1.06449600  |
| C | -1.96525700 | -2.02240000 | 3.13532400  |
| C | -2.45897500 | -4.03350900 | -0.03720600 |
| C | -3.96345600 | -2.51108800 | 1.17089300  |
| C | -3.27741300 | -1.42355000 | 3.24371000  |
| C | -3.43308300 | -4.25580000 | -0.97483000 |
| H | -1.50773800 | -4.54578300 | -0.12383400 |
| C | -4.95298900 | -2.76687300 | 0.16968100  |
| C | -4.23301400 | -1.67115700 | 2.25488100  |
| C | -4.69705800 | -3.60832200 | -0.87889400 |

|   |             |             |             |
|---|-------------|-------------|-------------|
| H | -3.24177400 | -4.93422000 | -1.80184000 |
| H | -5.91346800 | -2.26544800 | 0.25767600  |
| H | -5.20732200 | -1.19209200 | 2.32602800  |
| H | -5.45468300 | -3.79244000 | -1.63584800 |
| C | 3.40279600  | 0.58720100  | -2.35012600 |
| C | 4.39989700  | 1.21083500  | -1.56178800 |
| C | 2.50364500  | 1.37249500  | -3.11266800 |
| C | 5.34334900  | 0.47189600  | -0.77875100 |
| C | 4.50410600  | 2.65237700  | -1.55078200 |
| C | 2.62849800  | 2.81233500  | -3.10609100 |
| C | 6.29877300  | 1.10402000  | -0.02742400 |
| H | 5.29419100  | -0.61080700 | -0.78549300 |
| C | 5.51848900  | 3.27290300  | -0.75634500 |
| C | 3.62554200  | 3.41148000  | -2.32993600 |
| C | 6.38922600  | 2.52479200  | -0.01141900 |
| H | 6.99810600  | 0.51732600  | 0.56195400  |
| H | 5.58407800  | 4.35874300  | -0.76184600 |
| H | 3.72756700  | 4.49557500  | -2.34074800 |
| H | 7.15481000  | 3.00867600  | 0.58915300  |
| C | -1.32370700 | -0.87995600 | 5.19775400  |
| H | -0.56672600 | -0.63525800 | 5.93714900  |
| C | -1.00330500 | -1.69552600 | 4.14488500  |
| H | 0.00613300  | -2.07559700 | 4.04869300  |
| C | -2.62803700 | -0.32246400 | 5.31821200  |
| H | -2.86414500 | 0.31744500  | 6.16463900  |
| C | -3.57161300 | -0.58060400 | 4.36130000  |
| H | -4.56869600 | -0.15125700 | 4.43143600  |
| C | 0.58885000  | 1.58762200  | -4.62083700 |
| H | -0.21461900 | 1.12583300  | -5.18905500 |
| C | 0.73538200  | 3.00508000  | -4.63215900 |
| H | 0.05579100  | 3.61208100  | -5.22442200 |
| C | 1.72515100  | 3.59517900  | -3.89337800 |
| H | 1.84483200  | 4.67653800  | -3.89047300 |
| C | 1.44185200  | 0.80278700  | -3.88855700 |
| H | 1.30548400  | -0.27159200 | -3.87367000 |
| H | -0.74827200 | 3.06012200  | 2.86305600  |
| C | 0.21723200  | 6.93245100  | 1.28808200  |
| H | 0.62409700  | 7.53446400  | 0.46679400  |
| H | -0.84683500 | 6.79285200  | 1.08245600  |
| H | 0.32134200  | 7.51971100  | 2.20798900  |
| C | 2.49112500  | 5.91276200  | 1.50443900  |
| H | 2.83575800  | 6.47398700  | 0.62750500  |
| H | 2.69891500  | 6.52456500  | 2.38995500  |
| H | 3.08193600  | 4.99288700  | 1.57381200  |



TS-EF-2R-1

l imaginary frequencies

H = -4967.742059

G = -4967.926565

E(M06-2X-DCM) = -4968.519667

|   |             |             |             |
|---|-------------|-------------|-------------|
| O | -2.33554200 | -1.42514000 | 0.42430200  |
| O | -2.93870800 | 0.72699800  | -0.89219800 |
| P | -1.70531600 | -0.00179200 | -0.10459300 |
| O | -1.23278500 | 0.72181300  | 1.12052500  |
| N | -0.64095700 | -0.39349600 | -1.25107600 |
| S | 0.24188000  | 0.66189200  | -2.03891500 |
| C | -0.19459600 | 0.31976200  | -3.82192900 |
| F | 0.53208100  | 1.11498400  | -4.61312600 |
| F | 0.05583600  | -0.95606800 | -4.15416200 |
| F | -1.49119600 | 0.56738000  | -4.02427300 |
| C | -0.07774600 | -0.44868600 | 4.35457300  |
| C | -0.20278000 | 1.10200400  | 4.20432300  |
| H | -0.99044300 | 1.31485300  | 3.47959000  |
| H | -0.52394200 | 1.49698500  | 5.17939500  |
| C | 1.02456000  | 1.84199100  | 3.78137200  |
| C | 0.54901300  | -1.07175000 | 3.06245400  |
| H | -0.24262500 | -1.53043200 | 2.46683500  |
| H | 1.26563600  | -1.84868300 | 3.32958900  |
| N | 1.21621000  | -0.13237600 | 2.13681400  |
| C | 2.53161600  | -0.14606000 | 1.82914300  |
| N | 2.89279900  | 0.18550300  | 0.57756800  |
| C | 4.22051900  | 0.36285000  | 0.08746000  |
| C | 5.11236900  | 1.27165200  | 0.66300300  |
| C | 4.59093000  | -0.36307500 | -1.04469400 |
| C | 6.38736900  | 1.41794100  | 0.12165000  |
| C | 5.87098500  | -0.20266200 | -1.57888400 |
| H | 3.88023300  | -1.04145400 | -1.50273400 |
| C | 6.77842500  | 0.67876100  | -0.99784200 |
| H | 7.77383900  | 0.79275900  | -1.40954500 |
| C | 6.26078800  | -1.04367200 | -2.76740100 |
| C | 7.33542200  | 2.43402300  | 0.70385800  |
| F | 6.37584100  | -2.35211800 | -2.42489300 |
| F | 7.44287000  | -0.66497200 | -3.29429100 |
| F | 5.33422800  | -0.98176200 | -3.74493500 |
| F | 7.06050600  | 2.69355400  | 2.00126700  |
| F | 7.26909800  | 3.61155900  | 0.04266200  |
| F | 8.61736000  | 2.01514500  | 0.63332400  |
| S | 3.67945400  | -0.45301300 | 3.09169900  |

|   |             |             |             |
|---|-------------|-------------|-------------|
| H | 4.81865800  | 1.85512500  | 1.52547000  |
| C | 2.24271300  | 1.87036100  | 4.45110400  |
| H | 2.19430700  | 0.14649400  | -0.18527500 |
| H | 2.88589900  | 0.80457800  | 3.92807900  |
| H | 2.94508000  | 2.66057400  | 4.18545100  |
| O | 1.67647200  | 0.27793400  | -1.94680000 |
| H | 0.53796200  | 0.26128900  | 1.46259200  |
| O | -0.07867100 | 2.08015800  | -1.83158000 |
| H | 2.26993100  | 1.56893400  | 5.49785200  |
| C | -6.38250600 | 1.67516200  | 1.28261000  |
| C | -6.20858500 | 0.40256600  | 0.74737900  |
| C | -5.08780800 | 0.10853300  | -0.04329500 |
| C | -4.25240700 | 2.37896800  | 0.30222900  |
| C | -5.42277000 | 2.65635500  | 1.02897600  |
| C | -2.81623200 | -2.36430700 | -0.48698200 |
| C | -4.07913700 | -2.19180800 | -1.05326900 |
| C | -4.47401400 | -3.03639800 | -2.10363100 |
| C | -3.67784000 | -4.10773500 | -2.49383400 |
| C | -2.48209300 | -4.34570500 | -1.81537300 |
| C | -2.02016500 | -3.48259300 | -0.80909900 |
| H | -5.56368900 | 3.66183100  | 1.41494300  |
| H | -1.87420000 | -5.20749000 | -2.07531600 |
| C | -5.23952300 | -1.27084700 | -0.67571200 |
| C | -6.17216100 | -1.95348700 | 0.38344200  |
| H | -6.72043800 | -2.80578800 | -0.02966300 |
| H | -5.55327700 | -2.32343000 | 1.20929700  |
| H | -5.79563400 | -2.56327500 | -3.77256100 |
| H | -6.61323900 | -3.26839300 | -2.38239000 |
| C | -4.09524300 | 1.07237700  | -0.19940800 |
| H | -7.25679500 | 1.91063300  | 1.88449100  |
| H | -3.98558000 | -4.76336100 | -3.30449400 |
| C | -7.09029100 | -0.81920100 | 0.88981500  |
| H | -7.99540800 | -0.73158900 | 0.27243700  |
| H | -7.42825500 | -0.97724200 | 1.92050600  |
| C | -5.80137800 | -2.58854400 | -2.67689100 |
| C | -5.98297600 | -1.18860400 | -2.05083500 |
| H | -7.03121700 | -0.89303200 | -1.94201200 |
| H | -5.48555800 | -0.43660500 | -2.67382800 |
| C | -0.75790900 | -3.82085400 | -0.07547200 |
| C | -0.83867900 | -4.27806700 | 1.26515400  |
| C | 0.49484700  | -3.78131000 | -0.73487200 |
| C | -2.07796400 | -4.39278200 | 1.97535800  |
| C | 0.36507300  | -4.68047300 | 1.95911700  |
| C | 1.68924100  | -4.19686900 | -0.03198200 |

|   |             |             |             |
|---|-------------|-------------|-------------|
| C | -2.12499000 | -4.84488300 | 3.26898400  |
| H | -2.99739400 | -4.12444900 | 1.46782600  |
| C | 0.27392300  | -5.13935100 | 3.31137000  |
| C | 1.59341800  | -4.62786600 | 1.29381800  |
| C | -0.93291200 | -5.21876100 | 3.95355500  |
| H | -3.08202900 | -4.92763100 | 3.77731800  |
| H | 1.19091000  | -5.43734300 | 3.81491200  |
| H | 2.49501500  | -4.94008700 | 1.81746900  |
| H | -0.98884500 | -5.57909700 | 4.97735700  |
| C | -3.24027200 | 3.45317300  | 0.06032300  |
| C | -3.01510100 | 3.92420000  | -1.25695200 |
| C | -2.54404600 | 4.03202300  | 1.14981800  |
| C | -3.72505000 | 3.42295500  | -2.39443000 |
| C | -2.05013100 | 4.97467400  | -1.48511200 |
| C | -1.59852400 | 5.09854100  | 0.90767500  |
| C | -3.48039900 | 3.89775800  | -3.65590900 |
| H | -4.47611500 | 2.65533700  | -2.24825100 |
| C | -1.81992600 | 5.43839500  | -2.81758000 |
| C | -1.37067400 | 5.53247900  | -0.40014600 |
| C | -2.50946600 | 4.91509400  | -3.87654600 |
| H | -4.03396300 | 3.49561900  | -4.50026300 |
| H | -1.07997500 | 6.22078500  | -2.96818000 |
| H | -0.64971600 | 6.32789100  | -0.57792000 |
| H | -2.32414900 | 5.27370000  | -4.88537300 |
| C | 1.86942300  | -3.29525800 | -2.69470100 |
| H | 1.95296400  | -2.91745100 | -3.70902900 |
| C | 0.64359200  | -3.32479000 | -2.08314400 |
| H | -0.22920300 | -2.96284300 | -2.60959700 |
| C | 3.04073300  | -3.72134200 | -2.00446000 |
| H | 4.00617600  | -3.68026100 | -2.50140800 |
| C | 2.94917400  | -4.15375300 | -0.70816200 |
| H | 3.83583400  | -4.47300600 | -0.16521900 |
| C | -2.05755100 | 4.21147600  | 3.54154600  |
| H | -2.23028300 | 3.87751800  | 4.56181600  |
| C | -1.13951700 | 5.27322000  | 3.29747100  |
| H | -0.62376700 | 5.74472100  | 4.13016200  |
| C | -0.91435800 | 5.69349100  | 2.01407100  |
| H | -0.21238400 | 6.49872500  | 1.80920000  |
| C | -2.72420600 | 3.60722300  | 2.50617200  |
| H | -3.40347500 | 2.78769600  | 2.70940600  |
| H | 0.93340800  | 2.43317300  | 2.87204000  |
| C | 0.74114800  | -0.86115500 | 5.59539300  |
| H | 0.67980100  | -1.94716900 | 5.73216800  |
| H | 1.80125600  | -0.61110300 | 5.50969600  |

|   |             |             |            |
|---|-------------|-------------|------------|
| H | 0.34354000  | -0.39190800 | 6.50326500 |
| C | -1.50857400 | -1.00264200 | 4.51596900 |
| H | -1.49284900 | -2.09584200 | 4.58795500 |
| H | -1.97714600 | -0.61227900 | 5.42744600 |
| H | -2.13121400 | -0.73029200 | 3.65777000 |

TS-EF-2R-2

1 imaginary frequencies

H = -4967.743966

G = -4967.926010

E(M06-2X-DCM) = -4968.522122

|   |             |             |             |
|---|-------------|-------------|-------------|
| O | -1.89572900 | -1.67284800 | 0.22177500  |
| O | -3.12516700 | 0.36158400  | -0.82592000 |
| P | -1.63645900 | -0.15880800 | -0.38061000 |
| O | -1.04684900 | 0.62290000  | 0.75723400  |
| N | -0.91027900 | -0.32355100 | -1.80287500 |
| S | 0.20690600  | 0.57510100  | -2.46514500 |
| C | -0.56228700 | 2.26020000  | -2.73150100 |
| F | 0.29229200  | 3.04543700  | -3.39590200 |
| F | -1.69155200 | 2.15120800  | -3.43398600 |
| F | -0.83893300 | 2.82773400  | -1.54828900 |
| C | -0.20664100 | -0.76072700 | 4.22235400  |
| C | -0.39453700 | 0.78865400  | 4.17057500  |
| H | -1.14333200 | 1.01831500  | 3.40919200  |
| H | -0.79944900 | 1.10246000  | 5.14409300  |
| C | 0.82165100  | 1.60842800  | 3.87690700  |
| C | 0.53293300  | -1.25060200 | 2.93309600  |
| H | -0.18735500 | -1.72147400 | 2.26076200  |
| H | 1.28883600  | -1.99250200 | 3.19132900  |
| N | 1.17291400  | -0.19791500 | 2.12015500  |
| C | 2.49565300  | -0.10859000 | 1.86641900  |
| N | 2.85738300  | 0.37875800  | 0.66851300  |
| C | 4.17562700  | 0.64451300  | 0.19859500  |
| C | 5.06608500  | 1.46947500  | 0.89113400  |
| C | 4.54189800  | 0.09116900  | -1.02984500 |
| C | 6.33594700  | 1.70164800  | 0.36691700  |
| C | 5.81926000  | 0.33030400  | -1.54026400 |
| H | 3.83613000  | -0.52468200 | -1.57662000 |
| C | 6.72493200  | 1.12856100  | -0.84591500 |
| H | 7.71756600  | 1.30453000  | -1.24208300 |
| C | 6.22059800  | -0.34772900 | -2.82575300 |
| C | 7.27765600  | 2.63671700  | 1.08055400  |
| F | 6.40855300  | -1.67912100 | -2.63781300 |
| F | 7.37188500  | 0.14848000  | -3.32366800 |

|   |             |             |             |
|---|-------------|-------------|-------------|
| F | 5.27206400  | -0.22095900 | -3.77447500 |
| F | 7.02882000  | 2.68442500  | 2.40792200  |
| F | 7.16994500  | 3.90124600  | 0.61337800  |
| F | 8.56571500  | 2.26554800  | 0.91877500  |
| S | 3.62120300  | -0.47664700 | 3.13364600  |
| H | 4.77639100  | 1.92082800  | 1.83048000  |
| C | 1.99853000  | 1.63761800  | 4.61660000  |
| H | 2.13349100  | 0.44354700  | -0.06991300 |
| H | 2.73308700  | 0.65319100  | 4.04145300  |
| H | 2.67157700  | 2.47999700  | 4.45650100  |
| O | 0.52868300  | 0.09537000  | -3.80787300 |
| H | 0.50746700  | 0.19245200  | 1.42075900  |
| O | 1.35115600  | 0.88872400  | -1.56350300 |
| H | 1.98695400  | 1.25036100  | 5.63474100  |
| C | -6.15926000 | 0.60446600  | 2.04454300  |
| C | -5.86494100 | -0.60568800 | 1.42432300  |
| C | -4.89784800 | -0.67330200 | 0.40963800  |
| C | -4.46197400 | 1.71552800  | 0.67463900  |
| C | -5.48275100 | 1.75563100  | 1.63971700  |
| C | -2.37750300 | -2.68856800 | -0.60366200 |
| C | -3.73743000 | -2.73707400 | -0.90357000 |
| C | -4.18686700 | -3.62905500 | -1.88986700 |
| C | -3.31456700 | -4.54367800 | -2.47036500 |
| C | -1.98725700 | -4.58024500 | -2.04067000 |
| C | -1.48705700 | -3.65763100 | -1.10817700 |
| H | -5.73466300 | 2.71444200  | 2.08366400  |
| H | -1.30824100 | -5.32659100 | -2.44276800 |
| C | -4.93425100 | -2.04641200 | -0.25441300 |
| C | -5.49069100 | -2.90775900 | 0.93159700  |
| H | -5.95495400 | -3.83806000 | 0.59033700  |
| H | -4.65729100 | -3.17410000 | 1.59242500  |
| H | -5.87881000 | -3.36846100 | -3.24099800 |
| H | -6.26732300 | -4.23299800 | -1.75792800 |
| C | -4.15408600 | 0.46470100  | 0.10218400  |
| H | -6.91753800 | 0.66162400  | 2.82159600  |
| H | -3.66061800 | -5.23639400 | -3.23327600 |
| C | -6.46605900 | -1.97126100 | 1.67651900  |
| H | -7.48180200 | -2.04013600 | 1.26242900  |
| H | -6.54677300 | -2.20610200 | 2.74423500  |
| C | -5.65941600 | -3.41437500 | -2.16821500 |
| C | -5.94900900 | -2.07942600 | -1.44604300 |
| H | -6.98741200 | -1.98077700 | -1.11409900 |
| H | -5.72973900 | -1.24061800 | -2.11634400 |
| C | -0.07636000 | -3.79135600 | -0.62073400 |

|   |             |             |             |
|---|-------------|-------------|-------------|
| C | 0.15247100  | -4.28319200 | 0.69010400  |
| C | 1.01860100  | -3.52616500 | -1.47845400 |
| C | -0.90903200 | -4.63960800 | 1.58488400  |
| C | 1.50778400  | -4.47426000 | 1.15792400  |
| C | 2.36959900  | -3.73447400 | -1.00126800 |
| C | -0.65616300 | -5.12126800 | 2.84427500  |
| H | -1.93368200 | -4.53935900 | 1.24520100  |
| C | 1.72880100  | -4.96791800 | 2.48277700  |
| C | 2.57679500  | -4.19092300 | 0.30304500  |
| C | 0.68142900  | -5.28145000 | 3.30769000  |
| H | -1.48386900 | -5.39795900 | 3.49241300  |
| H | 2.75564300  | -5.10090900 | 2.81566700  |
| H | 3.59458400  | -4.34282400 | 0.65728100  |
| H | 0.86445900  | -5.66795900 | 4.30684400  |
| C | -3.78855400 | 2.98338400  | 0.25220200  |
| C | -3.99533600 | 3.48328100  | -1.05850600 |
| C | -3.01063700 | 3.72195700  | 1.17691400  |
| C | -4.81417200 | 2.81712700  | -2.02556600 |
| C | -3.38250300 | 4.73137600  | -1.45272000 |
| C | -2.41916100 | 4.97802500  | 0.77335200  |
| C | -4.98749300 | 3.32370500  | -3.28674400 |
| H | -5.30934500 | 1.89410600  | -1.74775200 |
| C | -3.58373600 | 5.22306500  | -2.78010900 |
| C | -2.61328100 | 5.44296400  | -0.52891000 |
| C | -4.35846500 | 4.53934800  | -3.67692700 |
| H | -5.61193900 | 2.79260300  | -4.00001500 |
| H | -3.10463700 | 6.15845500  | -3.05950400 |
| H | -2.15945800 | 6.38505700  | -0.82982100 |
| H | -4.50161900 | 4.92133100  | -4.68395600 |
| C | 1.93266600  | -2.79422700 | -3.62112500 |
| H | 1.77488100  | -2.39070400 | -4.61559300 |
| C | 0.85259100  | -3.03925400 | -2.81410100 |
| H | -0.14565100 | -2.82248200 | -3.17291500 |
| C | 3.25902100  | -3.01084900 | -3.15154400 |
| H | 4.10326200  | -2.79192900 | -3.79815000 |
| C | 3.46887600  | -3.46099600 | -1.87483900 |
| H | 4.47883500  | -3.61107400 | -1.50072700 |
| C | -2.04161200 | 4.03922400  | 3.40128000  |
| H | -1.89880400 | 3.69119000  | 4.42153200  |
| C | -1.46990200 | 5.28059700  | 2.99955400  |
| H | -0.89413000 | 5.86642500  | 3.71124500  |
| C | -1.65067500 | 5.72737600  | 1.71886300  |
| H | -1.21681000 | 6.67026800  | 1.39417800  |
| C | -2.77411400 | 3.28485900  | 2.52043400  |

|   |             |             |            |
|---|-------------|-------------|------------|
| H | -3.19518000 | 2.33868300  | 2.83984500 |
| H | 0.74924400  | 2.27073600  | 3.01640500 |
| C | 0.55518400  | -1.22492300 | 5.48094500 |
| H | 0.54518700  | -2.31972100 | 5.53390500 |
| H | 1.60378100  | -0.91780700 | 5.48024400 |
| H | 0.08007300  | -0.84509000 | 6.39345000 |
| C | -1.61494600 | -1.38986000 | 4.25197900 |
| H | -1.54493600 | -2.48328600 | 4.24509400 |
| H | -2.15863200 | -1.09240900 | 5.15670000 |
| H | -2.20039100 | -1.08654200 | 3.37752100 |

INT-8

0 imaginary frequencies

H = -4967.796089

G = -4967.976330

E(M06-2X-DCM) = -4968.585630

|   |            |             |             |
|---|------------|-------------|-------------|
| O | 1.55217500 | -2.11807700 | -0.07204000 |
| O | 3.12168100 | -0.12694100 | 0.46416000  |
| P | 1.56222900 | -0.49531900 | 0.13201800  |
| O | 0.74592300 | -0.05030100 | 1.31239400  |
| C | 2.58212700 | -4.38996200 | 3.29495700  |
| C | 3.56595900 | -3.87805200 | 2.45538200  |
| C | 3.21660200 | -3.18741400 | 1.28537800  |
| C | 0.85406900 | -3.45862400 | 1.83187000  |
| C | 1.24111100 | -4.20482400 | 2.95833400  |
| C | 4.12983000 | -0.44107400 | -0.45453800 |
| C | 4.62420500 | -1.74476900 | -0.50942500 |
| C | 5.51185900 | -2.09680300 | -1.53905400 |
| C | 5.98672800 | -1.13917900 | -2.42777200 |
| C | 5.57970100 | 0.18498500  | -2.27315300 |
| C | 4.64317600 | 0.56505500  | -1.29736300 |
| H | 0.46268000 | -4.62602600 | 3.58774400  |
| H | 5.97629300 | 0.95334700  | -2.93018900 |
| C | 4.45912600 | -2.92469100 | 0.44512300  |
| C | 5.55095100 | -2.89833600 | 1.56866600  |
| H | 5.56373600 | -1.90071400 | 2.02283800  |
| H | 6.55417900 | -3.10140600 | 1.18138000  |
| H | 6.82923100 | -3.76760100 | -1.11979000 |
| H | 5.76122200 | -4.04284600 | -2.49168000 |
| C | 1.87465100 | -2.92497400 | 1.02337900  |
| H | 2.84803100 | -4.93446500 | 4.19755700  |
| H | 6.67657400 | -1.41024200 | -3.22295600 |
| C | 5.07064800 | -3.93652800 | 2.60660100  |
| H | 5.40041300 | -3.70004400 | 3.62475300  |

|   |             |             |             |
|---|-------------|-------------|-------------|
| H | 5.45532900  | -4.94009300 | 2.37681100  |
| C | 5.81559000  | -3.57863000 | -1.50037600 |
| C | 4.74063900  | -4.11530800 | -0.53184900 |
| H | 3.82187100  | -4.33962400 | -1.08570500 |
| H | 5.04353800  | -5.02516500 | -0.00435600 |
| C | 4.30590600  | 2.01834600  | -1.16601100 |
| C | 3.61218100  | 2.68594500  | -2.20435300 |
| C | 4.80497000  | 2.74962600  | -0.05803600 |
| C | 3.07630800  | 2.00073900  | -3.34166200 |
| C | 3.41865900  | 4.11736500  | -2.13029600 |
| C | 4.58725900  | 4.17763700  | 0.01204400  |
| C | 2.42151900  | 2.67726300  | -4.33606600 |
| H | 3.16162700  | 0.92272100  | -3.38973100 |
| C | 2.73620300  | 4.78575100  | -3.19494100 |
| C | 3.90516700  | 4.82098700  | -1.02514100 |
| C | 2.25557300  | 4.08968700  | -4.27031500 |
| H | 2.00115700  | 2.12676900  | -5.17246300 |
| H | 2.60785400  | 5.86375400  | -3.12729900 |
| H | 3.76221400  | 5.89915500  | -0.97741600 |
| H | 1.73439200  | 4.60756700  | -5.07090600 |
| C | -0.59938500 | -3.29556900 | 1.52249500  |
| C | -1.43460000 | -2.57909900 | 2.41347100  |
| C | -1.15143600 | -3.93080600 | 0.38242500  |
| C | -0.93286400 | -1.89029100 | 3.56616600  |
| C | -2.85708200 | -2.51774400 | 2.16494200  |
| C | -2.57154600 | -3.83758400 | 0.13177900  |
| C | -1.77344000 | -1.22785200 | 4.42371400  |
| H | 0.13500300  | -1.89082000 | 3.74902400  |
| C | -3.69816600 | -1.81449500 | 3.08438900  |
| C | -3.38581000 | -3.14310000 | 1.03216900  |
| C | -3.17820700 | -1.19240900 | 4.18703400  |
| H | -1.36666500 | -0.72299100 | 5.29651500  |
| H | -4.76666300 | -1.78601800 | 2.88470800  |
| H | -4.45461300 | -3.08409100 | 0.84179100  |
| H | -3.82846700 | -0.66293600 | 4.87745500  |
| C | 6.03845000  | 2.88177400  | 2.05125200  |
| H | 6.61175600  | 2.39425500  | 2.83528900  |
| C | 5.56006600  | 2.14496000  | 0.99864400  |
| H | 5.76200100  | 1.08087200  | 0.95427700  |
| C | 5.79826200  | 4.28370000  | 2.12721200  |
| H | 6.18543900  | 4.85263800  | 2.96827100  |
| C | 5.09501400  | 4.90862500  | 1.13227700  |
| H | 4.91932400  | 5.98160000  | 1.16745900  |
| C | -0.93326800 | -5.29575400 | -1.63286700 |



|   |             |             |             |
|---|-------------|-------------|-------------|
| H | -0.31170300 | -5.86858200 | -2.31595900 |
| C | -2.32902500 | -5.17953800 | -1.88659300 |
| H | -2.75874900 | -5.65647900 | -2.76324800 |
| C | -3.12354600 | -4.47379500 | -1.02466200 |
| H | -4.18971000 | -4.37564300 | -1.20488600 |
| C | -0.36701200 | -4.69671500 | -0.53837800 |
| H | 0.69616800  | -4.80596300 | -0.35844800 |
| C | 1.06758200  | 3.08191900  | 2.84466600  |
| C | 1.11376000  | 3.27614100  | 1.29829500  |
| H | 1.52106300  | 4.25166900  | 1.01888000  |
| H | 1.75904300  | 2.52001200  | 0.84659300  |
| C | -0.31385200 | 3.11682600  | 0.75850900  |
| C | -0.28564400 | 2.36182700  | 3.09963300  |
| H | -0.99637700 | 2.98336200  | 3.64127400  |
| H | -0.18721100 | 1.40493100  | 3.61410000  |
| N | -0.89536700 | 2.06081100  | 1.74268500  |
| C | -2.40095300 | 1.94073100  | 1.70139300  |
| N | -2.78027100 | 1.28921200  | 0.59038100  |
| C | -4.10236800 | 1.07351300  | 0.10859700  |
| C | -5.13968000 | 1.99588400  | 0.28691200  |
| C | -4.32323100 | -0.08724400 | -0.64446400 |
| C | -6.39376300 | 1.73616100  | -0.26384700 |
| C | -5.58644600 | -0.32943500 | -1.18315000 |
| H | -3.50944100 | -0.78059700 | -0.82025700 |
| C | -6.63175600 | 0.57343000  | -0.99472600 |
| H | -7.60714500 | 0.38478900  | -1.42645500 |
| C | -5.83422200 | -1.61112400 | -1.93590600 |
| C | -7.51992100 | 2.70902100  | -0.02197600 |
| F | -4.75245300 | -2.00734300 | -2.63165200 |
| F | -6.86415200 | -1.49724100 | -2.79945700 |
| F | -6.14964000 | -2.62798200 | -1.08637400 |
| F | -8.19690000 | 2.41072100  | 1.10944100  |
| F | -8.41488300 | 2.69585700  | -1.03312600 |
| F | -7.06884600 | 3.97522700  | 0.10910700  |
| S | -3.34309500 | 2.59792400  | 2.88716500  |
| H | -4.97728400 | 2.91047800  | 0.83726800  |
| H | -2.06814400 | 0.79388600  | 0.02264400  |
| H | -0.44069300 | 1.14702400  | 1.45834700  |
| C | -1.14262700 | 4.39593600  | 0.71172300  |
| H | -1.25544200 | 4.86978000  | 1.69020100  |
| H | -2.13884500 | 4.22257800  | 0.29574000  |
| H | -0.62676800 | 5.09679900  | 0.04773600  |
| N | 1.27993900  | 0.13518600  | -1.32727300 |
| S | -0.14978800 | 0.25808200  | -1.98369700 |

|   |             |             |             |
|---|-------------|-------------|-------------|
| O | -0.38712800 | 1.58281600  | -2.56988700 |
| O | -1.25547700 | -0.28766700 | -1.13735200 |
| C | -0.07106700 | -0.92083800 | -3.42932900 |
| F | 0.90376600  | -0.54683200 | -4.26899100 |
| F | -1.23592500 | -0.90039000 | -4.08320500 |
| F | 0.17339400  | -2.15992700 | -3.00172100 |
| C | 2.24892900  | 2.22304900  | 3.33044900  |
| H | 3.20021200  | 2.71053700  | 3.09333800  |
| H | 2.20390800  | 2.08712600  | 4.41863500  |
| H | 2.24040400  | 1.23896000  | 2.85556000  |
| C | 1.09420700  | 4.43224700  | 3.58880200  |
| H | 0.99288700  | 4.28353900  | 4.67072800  |
| H | 2.04798400  | 4.94132100  | 3.41092900  |
| H | 0.28912300  | 5.10248700  | 3.26829200  |
| H | -0.32122500 | 2.65075700  | -0.22968400 |

TS-PT-2

l imaginary frequencies

H = -4967.788320

G = -4967.967693

E(M06-2X-DCM) = -4968.573471

|   |             |             |             |
|---|-------------|-------------|-------------|
| O | -1.31439800 | 2.18798100  | -0.18782500 |
| O | -2.91392300 | 0.20932500  | 0.35537000  |
| P | -1.37662800 | 0.59077400  | -0.00170400 |
| O | -0.57803100 | 0.19762500  | 1.26263600  |
| C | -2.60017800 | 4.71584800  | 2.89452900  |
| C | -3.51644200 | 4.13779000  | 2.02180000  |
| C | -3.07657200 | 3.34785300  | 0.94934800  |
| C | -0.75985900 | 3.66533200  | 1.66450100  |
| C | -1.23716400 | 4.50191400  | 2.68887000  |
| C | -3.91564300 | 0.45040900  | -0.60752400 |
| C | -4.35871300 | 1.75523800  | -0.82214400 |
| C | -5.17658300 | 2.01718100  | -1.93411300 |
| C | -5.64283500 | 0.98019700  | -2.73400000 |
| C | -5.32100200 | -0.33302500 | -2.39298400 |
| C | -4.45484100 | -0.63288400 | -1.32848500 |
| H | -0.51077900 | 4.97635300  | 3.34167900  |
| H | -5.73675200 | -1.15866100 | -2.96283300 |
| C | -4.24190500 | 3.02093000  | 0.02607100  |
| C | -5.43063900 | 3.10549900  | 1.04596800  |
| H | -5.50259700 | 2.15168500  | 1.58162200  |
| H | -6.39113700 | 3.28406000  | 0.55322700  |
| H | -6.46460200 | 3.75587700  | -1.80114100 |
| H | -5.28036400 | 3.85667400  | -3.09898200 |

|   |             |             |             |
|---|-------------|-------------|-------------|
| C | -1.72015400 | 3.06814800  | 0.82958300  |
| H | -2.93544100 | 5.33772800  | 3.72071000  |
| H | -6.27484300 | 1.18212800  | -3.59492700 |
| C | -5.02682100 | 4.22416700  | 2.03076400  |
| H | -5.45157500 | 4.07945700  | 3.03058400  |
| H | -5.37072800 | 5.20802900  | 1.68216000  |
| C | -5.43041300 | 3.50276500  | -2.07274700 |
| C | -4.41894800 | 4.11418400  | -1.07925200 |
| H | -3.45544200 | 4.27048200  | -1.57747100 |
| H | -4.74126200 | 5.07480900  | -0.66607200 |
| C | -4.27056300 | -2.07160900 | -0.94831000 |
| C | -3.56435800 | -2.96180900 | -1.79189700 |
| C | -4.94781900 | -2.56256400 | 0.19833400  |
| C | -2.85559800 | -2.52334700 | -2.95518400 |
| C | -3.53979800 | -4.37472300 | -1.48219600 |
| C | -4.90239500 | -3.97562300 | 0.50284100  |
| C | -2.18340200 | -3.41021600 | -3.75482800 |
| H | -2.83310700 | -1.46601000 | -3.18350600 |
| C | -2.83241400 | -5.26714500 | -2.34772400 |
| C | -4.20751700 | -4.84110000 | -0.34702400 |
| C | -2.17501800 | -4.80204900 | -3.45425200 |
| H | -1.63646000 | -3.04605400 | -4.61884100 |
| H | -2.83057300 | -6.32703800 | -2.10382600 |
| H | -4.19146200 | -5.90579900 | -0.12148600 |
| H | -1.63851700 | -5.48881500 | -4.10323000 |
| C | 0.71033900  | 3.47782100  | 1.47603500  |
| C | 1.47820400  | 2.85555100  | 2.49019900  |
| C | 1.33825600  | 3.99199000  | 0.31457800  |
| C | 0.90331600  | 2.31508100  | 3.68667800  |
| C | 2.91041800  | 2.74516300  | 2.32924900  |
| C | 2.76419000  | 3.83154000  | 0.14783100  |
| C | 1.68599600  | 1.76348700  | 4.66764300  |
| H | -0.17310500 | 2.34417300  | 3.81064900  |
| C | 3.68869300  | 2.16001400  | 3.37625700  |
| C | 3.50954100  | 3.21349500  | 1.15635500  |
| C | 3.10026900  | 1.69319700  | 4.51978000  |
| H | 1.22342600  | 1.36740400  | 5.56803600  |
| H | 4.76480800  | 2.09080300  | 3.23848000  |
| H | 4.58208300  | 3.09391200  | 1.02305900  |
| H | 3.70313000  | 1.25032700  | 5.30726000  |
| C | -6.36172900 | -2.23511900 | 2.16839200  |
| H | -6.93779500 | -1.57407100 | 2.81030500  |
| C | -5.71666800 | -1.72586400 | 1.07108900  |
| H | -5.79328900 | -0.66739700 | 0.85055700  |

|   |             |             |             |
|---|-------------|-------------|-------------|
| C | -6.29159800 | -3.62352200 | 2.47610600  |
| H | -6.80813800 | -4.00914100 | 3.35073400  |
| C | -5.58426500 | -4.46558800 | 1.66088400  |
| H | -5.53345200 | -5.53088300 | 1.87399100  |
| C | 1.27103900  | 5.17930600  | -1.82006800 |
| H | 0.70659500  | 5.71509400  | -2.57888600 |
| C | 2.66975000  | 4.98418500  | -1.99587600 |
| H | 3.15815100  | 5.35996900  | -2.89077500 |
| C | 3.39309600  | 4.33074900  | -1.03594600 |
| H | 4.46059600  | 4.17311200  | -1.15496500 |
| C | 0.62988800  | 4.69990400  | -0.70824200 |
| H | -0.43485500 | 4.86827200  | -0.59147500 |
| C | -1.25977600 | -2.86909100 | 2.94156000  |
| C | -1.35080600 | -3.15259300 | 1.41136600  |
| H | -1.78159500 | -4.13422700 | 1.19713700  |
| H | -1.99945500 | -2.41526400 | 0.93162000  |
| C | 0.06963500  | -3.04231600 | 0.83622000  |
| C | 0.14984300  | -2.24305300 | 3.11961300  |
| H | 0.83452100  | -2.91995000 | 3.63480800  |
| H | 0.14335000  | -1.30201600 | 3.67328000  |
| N | 0.67988800  | -1.97300900 | 1.73963000  |
| C | 2.11454800  | -1.77294800 | 1.65404100  |
| N | 2.54782800  | -1.60754700 | 0.37967800  |
| C | 3.90489700  | -1.37556400 | 0.00077200  |
| C | 4.89843300  | -2.31167100 | 0.30020700  |
| C | 4.21551700  | -0.22318500 | -0.72245200 |
| C | 6.20821000  | -2.08315400 | -0.11430900 |
| C | 5.53584800  | -0.00799700 | -1.12999800 |
| H | 3.43627900  | 0.49338300  | -0.96152000 |
| C | 6.53631600  | -0.92879800 | -0.82802100 |
| H | 7.55772200  | -0.75298300 | -1.14435800 |
| C | 5.89577900  | 1.27134700  | -1.83785800 |
| C | 7.26860800  | -3.12073100 | 0.14518500  |
| F | 4.88950300  | 1.72942200  | -2.60482000 |
| F | 6.98233100  | 1.12323000  | -2.62653300 |
| F | 6.19627300  | 2.26062800  | -0.95042400 |
| F | 8.48255100  | -2.55739200 | 0.33216100  |
| F | 7.39064800  | -3.97638100 | -0.89716600 |
| F | 6.99032400  | -3.86581900 | 1.23545400  |
| S | 3.09278700  | -1.72034600 | 2.99516300  |
| H | 4.65078000  | -3.20521400 | 0.85880100  |
| H | 1.88112500  | -1.55100700 | -0.39476000 |
| H | 0.00629000  | -0.75990300 | 1.38729100  |
| C | 0.85459000  | -4.35669700 | 0.84645600  |

|   |             |             |             |
|---|-------------|-------------|-------------|
| H | 0.95063400  | -4.77583800 | 1.85261300  |
| H | 1.85779500  | -4.23225700 | 0.42930100  |
| H | 0.32424500  | -5.08457600 | 0.22352900  |
| N | -1.00627500 | -0.10451000 | -1.38468600 |
| S | 0.42142000  | -0.00350400 | -2.09787700 |
| O | 1.06031100  | -1.33799200 | -2.16173700 |
| O | 1.26584300  | 1.11505500  | -1.65490800 |
| C | -0.05386400 | 0.40249600  | -3.85787100 |
| F | -0.81699200 | -0.55961100 | -4.39170700 |
| F | 1.06166300  | 0.51816400  | -4.57929700 |
| F | -0.72465000 | 1.55440400  | -3.88788000 |
| C | -2.36643200 | -1.89966900 | 3.39630300  |
| H | -3.35743100 | -2.32528800 | 3.20422700  |
| H | -2.28860400 | -1.70314800 | 4.47311500  |
| H | -2.30294800 | -0.94321600 | 2.87009800  |
| C | -1.37196400 | -4.16551200 | 3.76744400  |
| H | -1.22461100 | -3.96375900 | 4.83555300  |
| H | -2.36689800 | -4.60950100 | 3.64644500  |
| H | -0.63048500 | -4.91330300 | 3.46486000  |
| H | 0.04239300  | -2.65038500 | -0.18370600 |

TS-1-1-3S

l imaginary frequencies

H = -4967.752016

G = -4967.931576

E(M06-2X-DCM) = -4968.525288

|   |             |             |             |
|---|-------------|-------------|-------------|
| C | 1.11210800  | -2.39211700 | -4.38532000 |
| C | 0.38159100  | -1.16371000 | -5.05837500 |
| H | 1.13387000  | -0.60830900 | -5.62928200 |
| H | -0.36134900 | -1.57261500 | -5.75491300 |
| C | -0.32107400 | -0.24111200 | -4.13367000 |
| C | 0.09902500  | -3.18772800 | -3.54244800 |
| H | 0.61578400  | -4.04534200 | -3.08914200 |
| H | -0.70545000 | -3.57284600 | -4.17226500 |
| N | -0.51718900 | -2.39150800 | -2.48844100 |
| C | -1.85734400 | -2.48317100 | -2.14842100 |
| N | -2.07789500 | -1.99455400 | -0.89164300 |
| C | -3.21412900 | -1.90327900 | -0.07447200 |
| C | -4.53614600 | -2.16888600 | -0.45997000 |
| C | -2.95782600 | -1.50380300 | 1.25025100  |
| C | -5.56227000 | -2.04030000 | 0.47814100  |
| C | -3.99449400 | -1.38987200 | 2.16889200  |
| H | -1.93988100 | -1.28245200 | 1.55478100  |
| C | -5.31154300 | -1.66142700 | 1.79592300  |

|   |             |             |             |
|---|-------------|-------------|-------------|
| H | -6.11892900 | -1.58438500 | 2.51389300  |
| C | -3.69146200 | -0.89226600 | 3.55562100  |
| C | -6.98894700 | -2.23858600 | 0.03530000  |
| F | -4.61355100 | -1.28981700 | 4.45463200  |
| F | -3.66105900 | 0.46879200  | 3.60230100  |
| F | -2.48242600 | -1.31256200 | 3.99569700  |
| F | -7.54806100 | -1.06522700 | -0.36065600 |
| F | -7.76277700 | -2.71611900 | 1.03515200  |
| F | -7.09016500 | -3.09049600 | -1.00303100 |
| S | -3.02127400 | -3.06528300 | -3.21799400 |
| C | 1.62613600  | -3.30271700 | -5.51479700 |
| H | 2.33790000  | -2.76979600 | -6.15502300 |
| H | 2.14491300  | -4.17249900 | -5.09609400 |
| H | 0.80671700  | -3.66827600 | -6.14467500 |
| C | 2.30027300  | -1.90896800 | -3.53694500 |
| H | 2.82900400  | -2.76665300 | -3.10605500 |
| H | 3.01667400  | -1.34813600 | -4.14808000 |
| H | 2.00064400  | -1.26197300 | -2.70908800 |
| H | -4.75237900 | -2.47582800 | -1.47288100 |
| C | 0.20490200  | 0.97049700  | -3.66037700 |
| H | -1.23878000 | -1.61261300 | -0.43949200 |
| H | 1.05956800  | 1.38075400  | -4.20329700 |
| H | -0.53667000 | 1.71413800  | -3.36019900 |
| H | 0.10358000  | -2.11407200 | -1.72629400 |
| H | 0.76650300  | 0.80957800  | -2.57260900 |
| O | -0.22500000 | 1.28241800  | 0.75259800  |
| O | 2.19122500  | 0.38720800  | 1.19166000  |
| P | 0.98131200  | 0.39517100  | 0.10486500  |
| O | 0.38863400  | -0.95657200 | -0.14712500 |
| C | 0.45440400  | 5.18284400  | 2.13281100  |
| C | 0.87647500  | 4.08667100  | 2.87634800  |
| C | 0.56866400  | 2.78082000  | 2.46545900  |
| C | -0.55310900 | 3.67601700  | 0.48706400  |
| C | -0.29067900 | 4.96791700  | 0.97575400  |
| C | 1.95017200  | -0.30935400 | 2.39122300  |
| C | 1.25678300  | 0.33785700  | 3.40984700  |
| C | 0.85866800  | -0.39963300 | 4.53692000  |
| C | 1.23737600  | -1.72938000 | 4.68496900  |
| C | 2.02254900  | -2.32575900 | 3.69825700  |
| C | 2.38246900  | -1.64281200 | 2.52498900  |
| H | -0.67218200 | 5.81527600  | 0.41440700  |
| H | 2.35204600  | -3.35403200 | 3.81571900  |
| C | 0.89288400  | 1.80635100  | 3.59584700  |
| C | 2.05052700  | 2.58260800  | 4.30829700  |

|   |              |              |              |
|---|--------------|--------------|--------------|
| H | 2. 18688200  | 2. 26425000  | 5. 34656100  |
| H | 2. 98599600  | 2. 38968100  | 3. 77104600  |
| H | -0. 89200500 | -0. 08285300 | 5. 78864800  |
| H | 0. 56157800  | 0. 73986400  | 6. 35632900  |
| C | -0. 05342600 | 2. 58905500  | 1. 23263600  |
| H | 0. 68142400  | 6. 19549100  | 2. 45596700  |
| H | 0. 93296400  | -2. 29944300 | 5. 55891600  |
| C | 1. 66580300  | 4. 07079100  | 4. 16684900  |
| H | 1. 05280600  | 4. 41037900  | 5. 01336500  |
| H | 2. 54059000  | 4. 72964000  | 4. 12753000  |
| C | 0. 00583500  | 0. 44740900  | 5. 45465200  |
| C | -0. 32771800 | 1. 66743700  | 4. 56973300  |
| H | -0. 50794700 | 2. 58294500  | 5. 14112100  |
| H | -1. 23016200 | 1. 45547900  | 3. 98684100  |
| C | 3. 23428000  | -2. 33770100 | 1. 50799100  |
| C | 4. 60481200  | -1. 99528700 | 1. 40186600  |
| C | 2. 70337500  | -3. 39602900 | 0. 73231600  |
| C | 5. 22168700  | -1. 00182800 | 2. 22797000  |
| C | 5. 44398200  | -2. 69239100 | 0. 45392500  |
| C | 3. 56117200  | -4. 10304800 | -0. 19281500 |
| C | 6. 55267300  | -0. 70000500 | 2. 10771500  |
| H | 4. 61717500  | -0. 48377300 | 2. 96387200  |
| C | 6. 82448400  | -2. 33486200 | 0. 34785300  |
| C | 4. 89956400  | -3. 72143000 | -0. 31915800 |
| C | 7. 36676500  | -1. 36633600 | 1. 14847000  |
| H | 6. 99448300  | 0. 05799700  | 2. 74872000  |
| H | 7. 43772700  | -2. 86147200 | -0. 37961200 |
| H | 5. 53944500  | -4. 25270000 | -1. 02109600 |
| H | 8. 41847600  | -1. 10746600 | 1. 06222200  |
| C | -1. 39641200 | 3. 53361100  | -0. 74216300 |
| C | -2. 68363000 | 2. 94341500  | -0. 64869500 |
| C | -0. 96248500 | 4. 09813600  | -1. 96997600 |
| C | -3. 22263100 | 2. 43246000  | 0. 57542900  |
| C | -3. 52870100 | 2. 87863900  | -1. 82109100 |
| C | -1. 83726300 | 4. 06197100  | -3. 12314100 |
| C | -4. 47057800 | 1. 86893800  | 0. 62815200  |
| H | -2. 63358700 | 2. 50335700  | 1. 48212100  |
| C | -4. 81438000 | 2. 25843700  | -1. 72850600 |
| C | -3. 08535200 | 3. 44104900  | -3. 02085400 |
| C | -5. 27510400 | 1. 75896400  | -0. 54108400 |
| H | -4. 84535500 | 1. 49486900  | 1. 57473200  |
| H | -5. 42103400 | 2. 19804100  | -2. 62905900 |
| H | -3. 73482000 | 3. 40769200  | -3. 89366500 |
| H | -6. 24319800 | 1. 27027400  | -0. 48463000 |

|   |             |             |             |
|---|-------------|-------------|-------------|
| C | 0.86104300  | -4.86868100 | 0.08410600  |
| H | -0.17788900 | -5.17216000 | 0.18092800  |
| C | 1.33692800  | -3.81775300 | 0.82472900  |
| H | 0.67385200  | -3.28456200 | 1.49490700  |
| C | 1.71531700  | -5.57198100 | -0.81467400 |
| H | 1.32402800  | -6.41180700 | -1.38288000 |
| C | 3.02384600  | -5.19122700 | -0.95159600 |
| H | 3.68799200  | -5.72118200 | -1.63078700 |
| C | 0.70849500  | 5.24687900  | -3.33667400 |
| H | 1.70081000  | 5.67650500  | -3.43632400 |
| C | -0.16904300 | 5.23653800  | -4.45708100 |
| H | 0.14969500  | 5.68177600  | -5.39577300 |
| C | -1.40276600 | 4.65339800  | -4.35138600 |
| H | -2.08063700 | 4.62665300  | -5.20163700 |
| C | 0.32736300  | 4.69971900  | -2.13885300 |
| H | 1.02429200  | 4.69443000  | -1.30976600 |
| N | 1.60265800  | 1.06527900  | -1.24941300 |
| S | 2.83450400  | 2.11187800  | -1.44779300 |
| C | 4.39954900  | 1.08786500  | -1.19202800 |
| O | 2.89737500  | 3.15438400  | -0.42049700 |
| O | 2.86701000  | 2.46588600  | -2.86983500 |
| F | 4.20005900  | -0.18601300 | -1.55737300 |
| F | 5.36713300  | 1.60866700  | -1.95171500 |
| F | 4.77776000  | 1.12656600  | 0.08178200  |
| H | -1.34651100 | -0.49725900 | -3.87783000 |

TS-1-1-3R

l imaginary frequencies

H = -4967.742182

G = -4967.923832

E(M06-2X-DCM) = -4968.523086

|   |             |             |             |
|---|-------------|-------------|-------------|
| C | 0.21336700  | 3.45382400  | -3.85856800 |
| C | 0.26604500  | 2.10332500  | -4.69100800 |
| H | 1.11783100  | 2.19759300  | -5.37555200 |
| H | -0.65927700 | 2.04577500  | -5.27448400 |
| C | 0.42707000  | 0.85942100  | -3.90720100 |
| C | -1.08647300 | 3.46950500  | -3.02836300 |
| H | -1.06022300 | 4.33085600  | -2.34642700 |
| H | -1.95156000 | 3.59436200  | -3.68182900 |
| N | -1.31504500 | 2.24622600  | -2.26817500 |
| C | -2.58789400 | 1.69729800  | -2.10313200 |
| N | -2.56935000 | 0.68871000  | -1.18715000 |
| C | -3.60530700 | -0.01033500 | -0.54103000 |
| C | -4.90363300 | -0.18732300 | -1.03763800 |



|   |             |             |             |
|---|-------------|-------------|-------------|
| C | -3.26155200 | -0.58662600 | 0.69545000  |
| C | -5.83288300 | -0.91705500 | -0.29120400 |
| C | -4.20420500 | -1.30364200 | 1.42465500  |
| H | -2.25899400 | -0.45158100 | 1.08592400  |
| C | -5.50254300 | -1.47699600 | 0.94034300  |
| H | -6.23628600 | -2.03456700 | 1.50944400  |
| C | -3.84533700 | -1.81944700 | 2.79151300  |
| C | -7.19995700 | -1.16276400 | -0.87707100 |
| F | -2.52812100 | -2.11582300 | 2.89381100  |
| F | -4.11189800 | -0.90458000 | 3.75933800  |
| F | -4.53736200 | -2.93278400 | 3.11189300  |
| F | -8.12127700 | -1.40735300 | 0.08134300  |
| F | -7.63491200 | -0.11227400 | -1.60229400 |
| F | -7.19616100 | -2.23689800 | -1.70229300 |
| S | -3.92301800 | 2.22707400  | -2.97555900 |
| C | 0.14526200  | 4.60822200  | -4.87628800 |
| H | 1.07320100  | 4.67707200  | -5.45462400 |
| H | 0.01042400  | 5.56255900  | -4.35468100 |
| H | -0.68971600 | 4.48527000  | -5.57567900 |
| C | 1.45986200  | 3.63054900  | -2.97811500 |
| H | 1.45351400  | 4.62766500  | -2.52478600 |
| H | 2.38189500  | 3.54308000  | -3.56336100 |
| H | 1.52838200  | 2.90912400  | -2.16095700 |
| H | -5.18350300 | 0.24827100  | -1.98582100 |
| C | 1.66226800  | 0.35047200  | -3.45701000 |
| H | -1.63411900 | 0.37453000  | -0.88931100 |
| H | 2.55852800  | 0.77904900  | -3.90923000 |
| H | 1.68470800  | -0.73686700 | -3.33961200 |
| H | -0.69568300 | 2.11224900  | -1.47441900 |
| H | 1.77300600  | 0.65793500  | -2.29645300 |
| O | 1.99233600  | -1.42544000 | 0.55268400  |
| O | 0.49819600  | 0.49359800  | 1.45980700  |
| P | 1.12249500  | -0.13354500 | 0.09120700  |
| O | -0.05939800 | -0.41823700 | -0.77792700 |
| C | -0.09749200 | -4.59000000 | 2.32313100  |
| C | 0.33471300  | -3.51341400 | 3.08990800  |
| C | 1.09855600  | -2.48256300 | 2.51792500  |
| C | 0.92893400  | -3.59211800 | 0.34368200  |
| C | 0.22456300  | -4.63409900 | 0.96598400  |
| C | 1.25615300  | 0.91687600  | 2.55666200  |
| C | 1.83275700  | -0.02470500 | 3.40490400  |
| C | 2.74205700  | 0.41914300  | 4.37815800  |
| C | 2.94534400  | 1.77799600  | 4.59372500  |
| C | 2.22565600  | 2.70260500  | 3.83706100  |

|   |              |              |              |
|---|--------------|--------------|--------------|
| C | 1. 37791100  | 2. 30008100  | 2. 79253300  |
| H | -0. 09399500 | -5. 47694400 | 0. 35940600  |
| H | 2. 33140400  | 3. 76454400  | 4. 03709500  |
| C | 1. 57519800  | -1. 51947900 | 3. 60159500  |
| C | 0. 44133900  | -1. 73449000 | 4. 66511300  |
| H | 0. 75134600  | -1. 43752200 | 5. 67126900  |
| H | -0. 42405500 | -1. 12351500 | 4. 38509300  |
| H | 3. 01820800  | -0. 85952600 | 6. 11125300  |
| H | 4. 47457600  | -0. 65679400 | 5. 14326700  |
| C | 1. 33550200  | -2. 51075200 | 1. 14814900  |
| H | -0. 68575600 | -5. 38732800 | 2. 76986700  |
| H | 3. 63938100  | 2. 12119100  | 5. 35661900  |
| C | 0. 06483900  | -3. 22617100 | 4. 54943800  |
| H | -0. 97829700 | -3. 41749500 | 4. 82201600  |
| H | 0. 68863500  | -3. 85235900 | 5. 20241000  |
| C | 3. 38519700  | -0. 75767600 | 5. 08051300  |
| C | 2. 95128900  | -1. 95465700 | 4. 20458900  |
| H | 3. 66587600  | -2. 09313500 | 3. 38525400  |
| H | 2. 88563600  | -2. 89687500 | 4. 75770000  |
| C | 0. 59473900  | 3. 31887200  | 2. 02454100  |
| C | 1. 26015600  | 4. 33214200  | 1. 28751900  |
| C | -0. 82372800 | 3. 31441300  | 2. 10299400  |
| C | 2. 68527200  | 4. 37997500  | 1. 14236500  |
| C | 0. 48672200  | 5. 36478700  | 0. 63174800  |
| C | -1. 58317100 | 4. 32609000  | 1. 40257200  |
| C | 3. 29706400  | 5. 38581700  | 0. 43998900  |
| H | 3. 28519600  | 3. 58780500  | 1. 57271000  |
| C | 1. 16688400  | 6. 40464700  | -0. 07798900 |
| C | -0. 90880700 | 5. 32675400  | 0. 69648700  |
| C | 2. 53314200  | 6. 42233000  | -0. 16727500 |
| H | 4. 37793200  | 5. 38386900  | 0. 33415400  |
| H | 0. 56848300  | 7. 18511900  | -0. 54314400 |
| H | -1. 48592700 | 6. 10233300  | 0. 19609300  |
| H | 3. 03824300  | 7. 21882700  | -0. 70733000 |
| C | 1. 23699700  | -3. 66195900 | -1. 12036400 |
| C | 0. 20371500  | -3. 49493900 | -2. 07367600 |
| C | 2. 55998100  | -3. 94084900 | -1. 54261700 |
| C | -1. 15494300 | -3. 22256300 | -1. 70907500 |
| C | 0. 51400300  | -3. 58479100 | -3. 48377600 |
| C | 2. 85817800  | -4. 01881800 | -2. 95463600 |
| C | -2. 13162900 | -3. 06795700 | -2. 65751100 |
| H | -1. 40337200 | -3. 12430000 | -0. 65926600 |
| C | -0. 53488800 | -3. 41250800 | -4. 44231700 |
| C | 1. 83035900  | -3. 83408500 | -3. 88445200 |

|   |             |             |             |
|---|-------------|-------------|-------------|
| C | -1.82137200 | -3.16519600 | -4.04487600 |
| H | -3.15310200 | -2.85902200 | -2.35235800 |
| H | -0.28484800 | -3.49210800 | -5.49800300 |
| H | 2.05811500  | -3.90117900 | -4.94674100 |
| H | -2.61063000 | -3.04303000 | -4.78183500 |
| C | -2.93283800 | 2.36228900  | 2.90316300  |
| H | -3.45989100 | 1.60665500  | 3.47797100  |
| C | -1.56231400 | 2.35640500  | 2.87066300  |
| H | -1.02038400 | 1.61482100  | 3.44556700  |
| C | -3.67289100 | 3.33916400  | 2.17855200  |
| H | -4.75869900 | 3.32454200  | 2.20800800  |
| C | -3.01246100 | 4.29718000  | 1.45884200  |
| H | -3.56350300 | 5.05890300  | 0.91261200  |
| C | 4.90220200  | -4.44611800 | -1.06401900 |
| H | 5.69716000  | -4.62037700 | -0.34409100 |
| C | 5.19393700  | -4.50221500 | -2.45638800 |
| H | 6.20722500  | -4.71495900 | -2.78593400 |
| C | 4.19757600  | -4.29553700 | -3.37168600 |
| H | 4.40457600  | -4.34515600 | -4.43820000 |
| C | 3.63286100  | -4.17548000 | -0.62437600 |
| H | 3.42795900  | -4.14011200 | 0.43964900  |
| N | 2.18614200  | 0.81794900  | -0.70465300 |
| S | 3.75505400  | 1.15064900  | -0.44080200 |
| C | 4.69908900  | -0.39834200 | -0.95709800 |
| O | 4.15511100  | 2.14889800  | -1.43507200 |
| O | 4.08692100  | 1.32760700  | 0.97639200  |
| F | 5.93508400  | -0.03965000 | -1.31465700 |
| F | 4.09887400  | -0.98116900 | -2.00816900 |
| F | 4.77581200  | -1.27048000 | 0.04578000  |
| H | -0.46017900 | 0.27077300  | -3.68979100 |

TS-1-2-3S

l imaginary frequencies

H = -4967.741922

G = -4967.924203

E(M06-2X-DCM) = -4968.522027

|   |            |             |             |
|---|------------|-------------|-------------|
| O | 2.18805500 | 1.85249200  | 0.49925300  |
| O | 3.15711000 | -0.16276100 | -0.82287600 |
| P | 1.94715300 | 0.28210100  | 0.17058900  |
| O | 2.02644400 | -0.40955500 | 1.52145000  |
| N | 0.56803600 | 0.18710800  | -0.65919800 |
| S | 0.02067400 | -1.10444700 | -1.41688900 |
| C | 0.46185200 | -0.82700100 | -3.21478400 |
| F | 0.03034000 | -1.86484000 | -3.93375100 |

|   |             |             |             |
|---|-------------|-------------|-------------|
| F | -0.12140800 | 0.28904800  | -3.66916700 |
| F | 1.78411800  | -0.71109700 | -3.35560400 |
| C | -0.65406900 | -0.35798900 | 4.38602800  |
| C | -1.04097800 | -1.83508700 | 3.97593600  |
| H | -0.58921700 | -2.49087900 | 4.73186700  |
| H | -2.12823600 | -1.92018100 | 4.04225900  |
| C | -0.60264100 | -2.29470300 | 2.63300000  |
| C | -1.05772900 | 0.66221300  | 3.25584900  |
| H | -0.15969600 | 1.17642500  | 2.90661200  |
| H | -1.73481000 | 1.41251000  | 3.66940300  |
| N | -1.67127400 | 0.08461100  | 2.05665100  |
| C | -3.04004700 | -0.07745200 | 1.90605500  |
| N | -3.36994700 | -0.50617400 | 0.65211300  |
| C | -4.62941500 | -0.74024600 | 0.05798900  |
| C | -5.77841900 | -1.14104400 | 0.75249500  |
| C | -4.68471200 | -0.61050000 | -1.33855700 |
| C | -6.96331000 | -1.36991100 | 0.05046800  |
| C | -5.87794400 | -0.83659900 | -2.01876100 |
| H | -3.79078800 | -0.33530100 | -1.88619400 |
| C | -7.03228600 | -1.21370100 | -1.33251900 |
| H | -7.95737400 | -1.39697800 | -1.86504500 |
| C | -5.93046400 | -0.58497200 | -3.50146700 |
| C | -8.20388000 | -1.74650200 | 0.81870200  |
| F | -6.15651800 | 0.72914000  | -3.76999700 |
| F | -6.92126900 | -1.27864800 | -4.10021000 |
| F | -4.77305900 | -0.90982000 | -4.11380700 |
| F | -7.91504200 | -2.48582500 | 1.91170300  |
| F | -9.06485500 | -2.46215600 | 0.06046200  |
| F | -8.87466500 | -0.65338000 | 1.24875600  |
| S | -4.11950100 | 0.19828700  | 3.16630200  |
| H | -5.74862800 | -1.27289700 | 1.82356700  |
| C | 0.70541300  | -2.60894500 | 2.26182500  |
| H | -2.60203600 | -0.58400200 | -0.02285000 |
| H | 1.42203300  | -2.81001100 | 3.05971800  |
| H | 0.82326500  | -3.20718300 | 1.35728100  |
| O | -1.45796200 | -1.05944000 | -1.41883300 |
| H | -1.14560600 | 0.24154200  | 1.19692300  |
| O | 0.65986400  | -2.37515100 | -1.04085900 |
| H | 1.17979400  | -1.52680900 | 1.84619300  |
| C | 7.03061900  | -0.02050000 | 0.77827800  |
| C | 6.42876400  | 1.12644500  | 0.27261400  |
| C | 5.16824800  | 1.06042700  | -0.34136300 |
| C | 5.05958000  | -1.33058400 | 0.14828800  |
| C | 6.35809500  | -1.23779700 | 0.67954300  |

|   |              |              |              |
|---|--------------|--------------|--------------|
| C | 2. 25976400  | 2. 80237400  | -0. 53134000 |
| C | 3. 44683300  | 2. 94153300  | -1. 25111800 |
| C | 3. 46891300  | 3. 79430600  | -2. 36714000 |
| C | 2. 36852900  | 4. 58266300  | -2. 68258700 |
| C | 1. 23459700  | 4. 51274100  | -1. 87670900 |
| C | 1. 14064100  | 3. 61460400  | -0. 79896100 |
| H | 6. 82879200  | -2. 14556600 | 1. 04482900  |
| H | 0. 37986700  | 5. 14694100  | -2. 09051100 |
| C | 4. 85185300  | 2. 39395900  | -1. 00804100 |
| C | 5. 68396100  | 3. 36016800  | -0. 09804800 |
| H | 5. 91006000  | 4. 30917000  | -0. 59342900 |
| H | 5. 10134300  | 3. 58422200  | 0. 80297700  |
| H | 4. 66644000  | 3. 60997900  | -4. 17919900 |
| H | 5. 41281600  | 4. 58382900  | -2. 91721300 |
| C | 4. 47203900  | -0. 14531100 | -0. 33325600 |
| H | 8. 01373700  | 0. 02389100  | 1. 24001800  |
| H | 2. 39042800  | 5. 25206200  | -3. 53873100 |
| C | 6. 94215900  | 2. 54971300  | 0. 28177300  |
| H | 7. 74640400  | 2. 68889100  | -0. 45401700 |
| H | 7. 35417300  | 2. 83958300  | 1. 25505600  |
| C | 4. 79175900  | 3. 69454100  | -3. 09379400 |
| C | 5. 42069600  | 2. 43353700  | -2. 46667000 |
| H | 6. 51469800  | 2. 43397600  | -2. 48813000 |
| H | 5. 07597600  | 1. 54160100  | -3. 00237000 |
| C | -0. 11912800 | 3. 60750700  | 0. 00811500  |
| C | -0. 10516200 | 4. 04993100  | 1. 35529200  |
| C | -1. 34808000 | 3. 28313900  | -0. 62105400 |
| C | 1. 09326700  | 4. 43068400  | 2. 04190800  |
| C | -1. 35094100 | 4. 15971900  | 2. 08220600  |
| C | -2. 58759100 | 3. 43421500  | 0. 10781000  |
| C | 1. 06952400  | 4. 84794300  | 3. 34733800  |
| H | 2. 03722300  | 4. 39259300  | 1. 51087800  |
| C | -1. 33155900 | 4. 59623400  | 3. 44479800  |
| C | -2. 55487300 | 3. 85864100  | 1. 43901600  |
| C | -0. 15738200 | 4. 92594100  | 4. 06605900  |
| H | 1. 99644600  | 5. 12942900  | 3. 84001400  |
| H | -2. 27908100 | 4. 66546700  | 3. 97388800  |
| H | -3. 48902300 | 3. 95666800  | 1. 98739100  |
| H | -0. 15655100 | 5. 25911800  | 5. 10037400  |
| C | 4. 38530400  | -2. 66411200 | 0. 10380300  |
| C | 4. 09602600  | -3. 27389400 | -1. 14227000 |
| C | 4. 11966700  | -3. 35512400 | 1. 31331200  |
| C | 4. 38590400  | -2. 65341000 | -2. 39921000 |
| C | 3. 50980700  | -4. 59447700 | -1. 17146900 |

|   |             |             |             |
|---|-------------|-------------|-------------|
| C | 3.56797300  | -4.69110300 | 1.26584100  |
| C | 4.08758700  | -3.26960900 | -3.58591000 |
| H | 4.85593400  | -1.67697900 | -2.40749400 |
| C | 3.20886200  | -5.20053200 | -2.43085000 |
| C | 3.26920700  | -5.26796000 | 0.02856300  |
| C | 3.48314000  | -4.55822200 | -3.60699500 |
| H | 4.31623600  | -2.77163000 | -4.52426500 |
| H | 2.75705700  | -6.18950400 | -2.43010400 |
| H | 2.84550700  | -6.26978200 | -0.00155200 |
| H | 3.24858900  | -5.02795100 | -4.55816500 |
| C | -2.63451800 | 2.52067300  | -2.55433200 |
| H | -2.66182200 | 2.13470900  | -3.56967900 |
| C | -1.42752600 | 2.79057100  | -1.96392400 |
| H | -0.51108200 | 2.60290400  | -2.50816300 |
| C | -3.85533100 | 2.71504000  | -1.84664900 |
| H | -4.79826600 | 2.48676000  | -2.33410300 |
| C | -3.82637800 | 3.14602100  | -0.54761100 |
| H | -4.74691000 | 3.27180100  | 0.01684300  |
| C | 4.12539000  | -3.49740900 | 3.75710600  |
| H | 4.32460500  | -3.04046000 | 4.72302100  |
| C | 3.61552200  | -4.82678400 | 3.70132500  |
| H | 3.44309300  | -5.37826600 | 4.62174300  |
| C | 3.33645400  | -5.39745300 | 2.48847100  |
| H | 2.93367300  | -6.40598600 | 2.42962700  |
| C | 4.36101600  | -2.78687200 | 2.60750100  |
| H | 4.72486500  | -1.76847700 | 2.67151600  |
| H | -1.37538000 | -2.41815800 | 1.87770500  |
| C | -1.42044400 | -0.05098700 | 5.68944800  |
| H | -1.17027600 | 0.95732900  | 6.03945400  |
| H | -2.50124300 | -0.09849500 | 5.53620800  |
| H | -1.13974000 | -0.75416000 | 6.48288500  |
| C | 0.85358200  | -0.22949900 | 4.68001900  |
| H | 1.06836400  | 0.78594100  | 5.03431700  |
| H | 1.15874900  | -0.92356400 | 5.47262600  |
| H | 1.47851100  | -0.39750000 | 3.80076500  |

TS-1-2-3S-1

l imaginary frequencies

H = -4967.741923

G = -4967.924204

E(M06-2X-DCM) = -4968.522021

|   |            |             |             |
|---|------------|-------------|-------------|
| O | 2.18825400 | 1.85237900  | 0.49969200  |
| O | 3.15710300 | -0.16274300 | -0.82280000 |
| P | 1.94716900 | 0.28206100  | 0.17071500  |

|   |             |             |             |
|---|-------------|-------------|-------------|
| O | 2.02636800  | -0.40983900 | 1.52146200  |
| N | 0.56807700  | 0.18740300  | -0.65913600 |
| S | 0.02051200  | -1.10390800 | -1.41712200 |
| C | 0.46184100  | -0.82612200 | -3.21494900 |
| F | 0.03045100  | -1.86389100 | -3.93412200 |
| F | -0.12143300 | 0.28996100  | -3.66924500 |
| F | 1.78410500  | -0.71012300 | -3.35560500 |
| C | -0.65426100 | -0.35895600 | 4.38620400  |
| C | -1.04122500 | -1.83590400 | 3.97571400  |
| H | -0.58955600 | -2.49192600 | 4.73150900  |
| H | -2.12848800 | -1.92097200 | 4.04195500  |
| C | -0.60281800 | -2.29524300 | 2.63270200  |
| C | -1.05795200 | 0.66156200  | 3.25630200  |
| H | -0.15996500 | 1.17600900  | 2.90729900  |
| H | -1.73517400 | 1.41162000  | 3.67005400  |
| N | -1.67137900 | 0.08424000  | 2.05691900  |
| C | -3.04015300 | -0.07783300 | 1.90619500  |
| N | -3.36991100 | -0.50650900 | 0.65220900  |
| C | -4.62937900 | -0.74025300 | 0.05793600  |
| C | -5.77836400 | -1.14141900 | 0.75224400  |
| C | -4.68463100 | -0.60987700 | -1.33855500 |
| C | -6.96323300 | -1.37002000 | 0.05008800  |
| C | -5.87782900 | -0.83576200 | -2.01889400 |
| H | -3.79070400 | -0.33437700 | -1.88603300 |
| C | -7.03217000 | -1.21321500 | -1.33283200 |
| H | -7.95722600 | -1.39635100 | -1.86546400 |
| C | -5.93038700 | -0.58352200 | -3.50149700 |
| C | -8.20381800 | -1.74700900 | 0.81810200  |
| F | -6.15703700 | 0.73060300  | -3.76948200 |
| F | -6.92085400 | -1.27739300 | -4.10058300 |
| F | -4.77281400 | -0.90757100 | -4.11392600 |
| F | -7.91497100 | -2.48655600 | 1.91095400  |
| F | -9.06458900 | -2.46262500 | 0.05959300  |
| F | -8.87483800 | -0.65411200 | 1.24834900  |
| S | -4.11974800 | 0.19781000  | 3.16633600  |
| H | -5.74858900 | -1.27372000 | 1.82326300  |
| C | 0.70526600  | -2.60933100 | 2.26144500  |
| H | -2.60194300 | -0.58429300 | -0.02270600 |
| H | 1.42186200  | -2.81059100 | 3.05931400  |
| H | 0.82310000  | -3.20748000 | 1.35683900  |
| O | -1.45811300 | -1.05867800 | -1.41909600 |
| H | -1.14566900 | 0.24138700  | 1.19725700  |
| O | 0.65945500  | -2.37478700 | -1.04131400 |
| H | 1.17971300  | -1.52714100 | 1.84602900  |

|   |             |             |             |
|---|-------------|-------------|-------------|
| C | 7.03057000  | -0.02118100 | 0.77849500  |
| C | 6.42883800  | 1.12593300  | 0.27306800  |
| C | 5.16834100  | 1.06016200  | -0.34097400 |
| C | 5.05944400  | -1.33095100 | 0.14811500  |
| C | 6.35794400  | -1.23840100 | 0.67944500  |
| C | 2.26004900  | 2.80242400  | -0.53074400 |
| C | 3.44715300  | 2.94160900  | -1.25045200 |
| C | 3.46936700  | 3.79458200  | -2.36632200 |
| C | 2.36906800  | 4.58309500  | -2.68166600 |
| C | 1.23509200  | 4.51312100  | -1.87584700 |
| C | 1.14100500  | 3.61480100  | -0.79826500 |
| H | 6.82855100  | -2.14629700 | 1.04453100  |
| H | 0.38043200  | 5.14744300  | -2.08957300 |
| C | 4.85210500  | 2.39386300  | -1.00739200 |
| C | 5.68424600  | 3.35980400  | -0.09715300 |
| H | 5.91045200  | 4.30889500  | -0.59231300 |
| H | 5.10159700  | 3.58371200  | 0.80388800  |
| H | 4.66700200  | 3.61050300  | -4.17834100 |
| H | 5.41336900  | 4.58404600  | -2.91611200 |
| C | 4.47202000  | -0.14551100 | -0.33315500 |
| H | 8.01367000  | 0.02301400  | 1.24028800  |
| H | 2.39105700  | 5.25265400  | -3.53768300 |
| C | 6.94235400  | 2.54915600  | 0.28256500  |
| H | 7.74665300  | 2.68842800  | -0.45314700 |
| H | 7.35433600  | 2.83877900  | 1.25593600  |
| C | 4.79225100  | 3.69484100  | -3.09291000 |
| C | 5.42104100  | 2.43366800  | -2.46598400 |
| H | 6.51504300  | 2.43400800  | -2.48738100 |
| H | 5.07626700  | 1.54186300  | -3.00186700 |
| C | -0.11881000 | 3.60763700  | 0.00873200  |
| C | -0.10490900 | 4.04982300  | 1.35598300  |
| C | -1.34773800 | 3.28344400  | -0.62057500 |
| C | 1.09349600  | 4.43040900  | 2.04273600  |
| C | -1.35072900 | 4.15953800  | 2.08284200  |
| C | -2.58728100 | 3.43438300  | 0.10825600  |
| C | 1.06969200  | 4.84746600  | 3.34822800  |
| H | 2.03748200  | 4.39235600  | 1.51175500  |
| C | -1.33141000 | 4.59585100  | 3.44550000  |
| C | -2.55462900 | 3.85857700  | 1.43954100  |
| C | -0.15725800 | 4.92541200  | 4.06688300  |
| H | 1.99659600  | 5.12883100  | 3.84100700  |
| H | -2.27896300 | 4.66505700  | 3.97453900  |
| H | -3.48880700 | 3.95651800  | 1.98788400  |
| H | -0.15647600 | 5.25843200  | 5.10124900  |



|   |             |             |             |
|---|-------------|-------------|-------------|
| C | 4.38504500  | -2.66440300 | 0.10325400  |
| C | 4.09574600  | -3.27383100 | -1.14298800 |
| C | 4.11929000  | -3.35570100 | 1.31257300  |
| C | 4.38572000  | -2.65304700 | -2.39976100 |
| C | 3.50940000  | -4.59435000 | -1.17255100 |
| C | 3.56747200  | -4.69161500 | 1.26473600  |
| C | 4.08737300  | -3.26890500 | -3.58663000 |
| H | 4.85585200  | -1.67666300 | -2.40777800 |
| C | 3.20843100  | -5.20004600 | -2.43210100 |
| C | 3.26869700  | -5.26812300 | 0.02729600  |
| C | 3.48280000  | -4.55745400 | -3.60807000 |
| H | 4.31610000  | -2.77070500 | -4.52484900 |
| H | 2.75653000  | -6.18897500 | -2.43162500 |
| H | 2.84490600  | -6.26989800 | -0.00309300 |
| H | 3.24822700  | -5.02690700 | -4.55937100 |
| C | -2.63408400 | 2.52138800  | -2.55408400 |
| H | -2.66133200 | 2.13562100  | -3.56950400 |
| C | -1.42712900 | 2.79119300  | -1.96356100 |
| H | -0.51066700 | 2.60370200  | -2.50782900 |
| C | -3.85492700 | 2.71559700  | -1.84640900 |
| H | -4.79786300 | 2.48744100  | -2.33392700 |
| C | -3.82603400 | 3.14631100  | -0.54727800 |
| H | -4.74659700 | 3.27199100  | 0.01714700  |
| C | 4.12488800  | -3.49860800 | 3.75632900  |
| H | 4.32410100  | -3.04192100 | 4.72236900  |
| C | 3.61490700  | -4.82792300 | 3.70018700  |
| H | 3.44238800  | -5.37962500 | 4.62045500  |
| C | 3.33583900  | -5.39825700 | 2.48717400  |
| H | 2.93296600  | -6.40673700 | 2.42805400  |
| C | 4.36063200  | -2.78779800 | 2.60691600  |
| H | 4.72456000  | -1.76944900 | 2.67120800  |
| H | -1.37556300 | -2.41870400 | 1.87741200  |
| C | -1.42068200 | -0.05224500 | 5.68967000  |
| H | -1.17055800 | 0.95600400  | 6.03989600  |
| H | -2.50147900 | -0.09975000 | 5.53638300  |
| H | -1.13999700 | -0.75557500 | 6.48297400  |
| C | 0.85338200  | -0.23056700 | 4.68024600  |
| H | 1.06817400  | 0.78478100  | 5.03480200  |
| H | 1.15853500  | -0.92483200 | 5.47268400  |
| H | 1.47831900  | -0.39836100 | 3.80095800  |

TS-1-2-3S-2

l imaginary frequencies

H = -4967.741359

G = -4967.923966

E(M06-2X-DCM) = -4968.520519

|   |             |             |             |
|---|-------------|-------------|-------------|
| O | 2.06917700  | 1.87186100  | 0.41529900  |
| O | 3.30786500  | 0.04223500  | -0.93866900 |
| P | 1.89977000  | 0.37733300  | -0.19454700 |
| O | 1.66129100  | -0.48089600 | 1.04046900  |
| N | 0.86248700  | 0.41982200  | -1.41658800 |
| S | -0.28107000 | -0.59158700 | -1.80131600 |
| C | 0.58542200  | -2.06528200 | -2.56076200 |
| F | -0.31721600 | -2.96658400 | -2.95371200 |
| F | 1.32069300  | -1.68995500 | -3.60376600 |
| F | 1.39012500  | -2.63427700 | -1.64195600 |
| C | -0.51716200 | -1.02330300 | 4.23188000  |
| C | -0.91082100 | -2.42485900 | 3.62172100  |
| H | -0.39322500 | -3.18041300 | 4.22809400  |
| H | -1.98853300 | -2.54951000 | 3.75601700  |
| C | -0.58093000 | -2.66902500 | 2.19124900  |
| C | -1.03460700 | 0.15004700  | 3.31651200  |
| H | -0.18119600 | 0.74657700  | 2.98563800  |
| H | -1.69702200 | 0.79810400  | 3.89290500  |
| N | -1.73326600 | -0.25537400 | 2.10291200  |
| C | -3.10006800 | -0.36681600 | 1.98134800  |
| N | -3.46988000 | -0.63880500 | 0.68976100  |
| C | -4.73067900 | -0.76073000 | 0.07388500  |
| C | -5.92185500 | -1.08464900 | 0.73688900  |
| C | -4.74819800 | -0.58602100 | -1.32121600 |
| C | -7.10544300 | -1.20631300 | 0.00608800  |
| C | -5.93990700 | -0.71064700 | -2.02899300 |
| H | -3.83020600 | -0.34502100 | -1.84946000 |
| C | -7.13298700 | -1.01904300 | -1.37367000 |
| H | -8.05686200 | -1.12459200 | -1.92883300 |
| C | -5.95418100 | -0.43137800 | -3.50852400 |
| C | -8.38656600 | -1.50091900 | 0.74337200  |
| F | -6.17292100 | 0.88664800  | -3.76008800 |
| F | -6.93654600 | -1.11148700 | -4.13909000 |
| F | -4.78740000 | -0.75338700 | -4.09946300 |
| F | -8.18104000 | -2.30244600 | 1.81082900  |
| F | -9.29494000 | -2.10953300 | -0.05215200 |
| F | -8.96529300 | -0.36926700 | 1.20650200  |
| S | -4.13641600 | -0.20881100 | 3.29914900  |
| H | -5.92202300 | -1.24013100 | 1.80551800  |
| C | 0.68903800  | -2.86246000 | 1.65845100  |
| H | -2.69586000 | -0.69519500 | 0.02455300  |
| H | 1.50579700  | -3.09307700 | 2.34180800  |

|   |             |             |             |
|---|-------------|-------------|-------------|
| H | 0.73958100  | -3.34113600 | 0.68004900  |
| O | -1.13987100 | -0.06524900 | -2.85892000 |
| H | -1.20488600 | -0.18534000 | 1.23683600  |
| O | -0.96374200 | -1.19425700 | -0.61449200 |
| H | 1.02144300  | -1.68302300 | 1.28599100  |
| C | 6.98045400  | 0.37229200  | 1.05787100  |
| C | 6.34552300  | 1.50183700  | 0.55434900  |
| C | 5.14887100  | 1.39295100  | -0.17355400 |
| C | 5.17294000  | -1.02530800 | 0.18372000  |
| C | 6.40664700  | -0.87852700 | 0.84120100  |
| C | 2.16589800  | 2.97347900  | -0.44846900 |
| C | 3.38095200  | 3.24041400  | -1.07272300 |
| C | 3.42562700  | 4.21025800  | -2.08630000 |
| C | 2.31135700  | 4.99535600  | -2.36217900 |
| C | 1.14849200  | 4.80907100  | -1.61482100 |
| C | 1.03559800  | 3.78623500  | -0.65704000 |
| H | 6.90660700  | -1.77255600 | 1.20145500  |
| H | 0.28789600  | 5.44803300  | -1.78728400 |
| C | 4.79509900  | 2.74789900  | -0.78239700 |
| C | 5.49327400  | 3.70115800  | 0.24876500  |
| H | 5.69087100  | 4.69287800  | -0.16826800 |
| H | 4.83100700  | 3.82907900  | 1.11284800  |
| H | 4.71833000  | 4.22154900  | -3.84117000 |
| H | 5.35860800  | 5.12248400  | -2.47212800 |
| C | 4.54212400  | 0.14263700  | -0.28958900 |
| H | 7.91487600  | 0.45772400  | 1.60661600  |
| H | 2.34489200  | 5.75683600  | -3.13718000 |
| C | 6.76807900  | 2.94823500  | 0.67802800  |
| H | 7.61197800  | 3.17419100  | 0.01129000  |
| H | 7.09214200  | 3.20505200  | 1.69294700  |
| C | 4.78756500  | 4.22499300  | -2.74745500 |
| C | 5.44759200  | 2.94248500  | -2.19149200 |
| H | 6.53932700  | 3.00189600  | -2.14278500 |
| H | 5.18621100  | 2.08567200  | -2.82294900 |
| C | -0.23449500 | 3.63893800  | 0.11946900  |
| C | -0.23461000 | 3.86833200  | 1.52018500  |
| C | -1.45239100 | 3.36993200  | -0.55675500 |
| C | 0.94581400  | 4.20048000  | 2.26140900  |
| C | -1.47882700 | 3.80102500  | 2.25429800  |
| C | -2.69218300 | 3.33935800  | 0.18888000  |
| C | 0.90848200  | 4.41093300  | 3.61545100  |
| H | 1.88715500  | 4.29876600  | 1.73340500  |
| C | -1.47419400 | 4.02020200  | 3.66833900  |
| C | -2.67020400 | 3.54333000  | 1.57100400  |

|   |             |             |             |
|---|-------------|-------------|-------------|
| C | -0.31549700 | 4.31146300  | 4.33605900  |
| H | 1.82240600  | 4.66443600  | 4.14636300  |
| H | -2.42119500 | 3.95598100  | 4.19887600  |
| H | -3.60327300 | 3.50087800  | 2.12839600  |
| H | -0.32580600 | 4.48082800  | 5.40941900  |
| C | 4.61873100  | -2.40215900 | -0.00154400 |
| C | 4.50744900  | -2.95814800 | -1.30057900 |
| C | 4.30121400  | -3.18712900 | 1.13635400  |
| C | 4.84849900  | -2.23558400 | -2.48863100 |
| C | 4.05009200  | -4.32064300 | -1.45795600 |
| C | 3.88233000  | -4.56067500 | 0.96402800  |
| C | 4.70718300  | -2.79579900 | -3.73086200 |
| H | 5.22654300  | -1.22422700 | -2.39846200 |
| C | 3.91614500  | -4.86796200 | -2.77238000 |
| C | 3.76004300  | -5.08548800 | -0.32535500 |
| C | 4.22660200  | -4.12771700 | -3.88026400 |
| H | 4.96724100  | -2.21992900 | -4.61470000 |
| H | 3.56196500  | -5.89147300 | -2.86935500 |
| H | 3.43649300  | -6.11691900 | -0.45028500 |
| H | 4.11773900  | -4.55268800 | -4.87417900 |
| C | -2.72038400 | 2.87163500  | -2.58553000 |
| H | -2.73714000 | 2.65065600  | -3.64852500 |
| C | -1.52211500 | 3.10466900  | -1.96255600 |
| H | -0.60412400 | 3.05374700  | -2.53451400 |
| C | -3.94042900 | 2.87560500  | -1.85251600 |
| H | -4.87461800 | 2.66941300  | -2.36580500 |
| C | -3.92056700 | 3.09323800  | -0.50090400 |
| H | -4.83981300 | 3.07487100  | 0.07934000  |
| C | 4.08117200  | -3.47600900 | 3.55744600  |
| H | 4.14373600  | -3.06316000 | 4.56081000  |
| C | 3.70179100  | -4.83799700 | 3.38112600  |
| H | 3.49060400  | -5.45649100 | 4.24927700  |
| C | 3.59750300  | -5.35674900 | 2.11829200  |
| H | 3.29697100  | -6.39087900 | 1.96676100  |
| C | 4.36329900  | -2.68009800 | 2.47615400  |
| H | 4.63322500  | -1.64211400 | 2.63051500  |
| H | -1.41415800 | -2.71438700 | 1.49493000  |
| C | -1.18449000 | -0.94807700 | 5.62047400  |
| H | -0.92407300 | -0.00219100 | 6.10967000  |
| H | -2.27385300 | -0.99686500 | 5.53826000  |
| H | -0.83848300 | -1.76159100 | 6.26970100  |
| C | 1.00695300  | -0.89514800 | 4.41518100  |
| H | 1.23629000  | 0.05661300  | 4.90935500  |
| H | 1.39733400  | -1.69874700 | 5.05132900  |

H 1.54962100 -0.90164100 3.46699300

TS-1-2-3R

1 imaginary frequencies

H = -4967.742916

G = -4967.925010

E(M06-2X-DCM) = -4968.520385

|   |             |             |             |
|---|-------------|-------------|-------------|
| O | 1.74434700  | -1.80242700 | -0.45795100 |
| O | 3.49991000  | -0.02940700 | 0.23494100  |
| P | 1.90731100  | -0.28495100 | 0.07846100  |
| O | 1.31556200  | -0.07623400 | 1.47520700  |
| N | 1.37356900  | 0.66740500  | -1.09801400 |
| S | -0.17073600 | 0.87713900  | -1.39396000 |
| C | -0.29758300 | 0.43957900  | -3.20468700 |
| F | -1.57827800 | 0.52735300  | -3.57766700 |
| F | 0.13593800  | -0.80511100 | -3.40845700 |
| F | 0.43127600  | 1.28333400  | -3.94385000 |
| C | -0.64483900 | 1.63798400  | 4.51646300  |
| C | -0.74970900 | 2.90781400  | 3.59631300  |
| H | -0.17393500 | 3.70256700  | 4.09200300  |
| H | -1.79927200 | 3.20990800  | 3.56489700  |
| C | -0.24083800 | 2.77804600  | 2.20440800  |
| C | -1.34861600 | 0.40794000  | 3.83698700  |
| H | -0.65370600 | -0.43420700 | 3.81937500  |
| H | -2.21781800 | 0.11537700  | 4.42789200  |
| N | -1.78717600 | 0.59612600  | 2.45243500  |
| C | -3.10521700 | 0.86388700  | 2.11650600  |
| N | -3.34192000 | 0.65532000  | 0.78840000  |
| C | -4.51726000 | 0.67829100  | 0.01419600  |
| C | -5.73790700 | 1.25758800  | 0.38889700  |
| C | -4.41426600 | 0.06020200  | -1.24485600 |
| C | -6.82624500 | 1.19160100  | -0.48383900 |
| C | -5.51500700 | -0.00423000 | -2.09231900 |
| H | -3.47092900 | -0.37736200 | -1.55309700 |
| C | -6.73652300 | 0.55909900  | -1.72237400 |
| H | -7.59408500 | 0.50576000  | -2.38142000 |
| C | -5.38930900 | -0.76993500 | -3.38188100 |
| C | -8.11068500 | 1.87969700  | -0.09725500 |
| F | -4.18107900 | -0.59861200 | -3.95921800 |
| F | -5.53242100 | -2.10829700 | -3.17694300 |
| F | -6.32874300 | -0.41251900 | -4.28167600 |
| F | -9.18477400 | 1.29929700  | -0.67938800 |
| F | -8.31307400 | 1.86284300  | 1.23647300  |
| F | -8.11157400 | 3.17812800  | -0.48018100 |

|   |              |              |              |
|---|--------------|--------------|--------------|
| S | -4. 21932000 | 1. 41040300  | 3. 25438700  |
| H | -5. 83699400 | 1. 73785500  | 1. 35105300  |
| C | 1. 08402200  | 2. 57377300  | 1. 83199900  |
| H | -2. 52991200 | 0. 35097900  | 0. 24234900  |
| H | 1. 86595800  | 2. 73983500  | 2. 57241100  |
| H | 1. 34128500  | 2. 84049800  | 0. 80511800  |
| O | -1. 04825800 | -0. 12698000 | -0. 72430000 |
| H | -1. 25021000 | 0. 06676800  | 1. 76844100  |
| O | -0. 58736700 | 2. 28155100  | -1. 28699600 |
| H | 1. 10564800  | 1. 29167600  | 1. 70385200  |
| C | 5. 69884900  | 0. 04036700  | -3. 32580000 |
| C | 5. 35684100  | -1. 17078300 | -2. 73423600 |
| C | 4. 71221100  | -1. 20257900 | -1. 48668200 |
| C | 4. 67818400  | 1. 24277400  | -1. 45622300 |
| C | 5. 39437200  | 1. 23050500  | -2. 66430700 |
| C | 2. 29264700  | -2. 91639300 | 0. 18626400  |
| C | 3. 64384400  | -3. 20486100 | 0. 00331600  |
| C | 4. 21412400  | -4. 25964700 | 0. 73436600  |
| C | 3. 42264600  | -5. 08569300 | 1. 52506600  |
| C | 2. 05138600  | -4. 84625300 | 1. 59674300  |
| C | 1. 45334200  | -3. 74790900 | 0. 95362800  |
| H | 5. 69004400  | 2. 18139500  | -3. 09733300 |
| H | 1. 41825100  | -5. 50738500 | 2. 18036400  |
| C | 4. 68142800  | -2. 63668800 | -0. 96393700 |
| C | 4. 67905000  | -3. 42009600 | -2. 32039400 |
| H | 3. 65423800  | -3. 45082800 | -2. 70783000 |
| H | 5. 02410100  | -4. 45228900 | -2. 20745200 |
| H | 5. 98379200  | -5. 16381400 | -0. 13431100 |
| H | 6. 26689100  | -4. 44323700 | 1. 44617200  |
| C | 4. 30629500  | -0. 00137700 | -0. 91293600 |
| H | 6. 20559500  | 0. 06546000  | -4. 28713300 |
| H | 3. 86068400  | -5. 91603000 | 2. 07310900  |
| C | 5. 56773600  | -2. 57454500 | -3. 25887000 |
| H | 5. 28217500  | -2. 67314600 | -4. 31223900 |
| H | 6. 62285300  | -2. 87369100 | -3. 18992700 |
| C | 5. 70911500  | -4. 31795400 | 0. 51111900  |
| C | 5. 99573200  | -2. 96686200 | -0. 17710400 |
| H | 6. 15636900  | -2. 19127000 | 0. 58071400  |
| H | 6. 87655300  | -2. 98628500 | -0. 82573900 |
| C | -0. 01948300 | -3. 52678100 | 1. 08768800  |
| C | -0. 58666100 | -3. 35100600 | 2. 37720600  |
| C | -0. 85714900 | -3. 56961000 | -0. 05657900 |
| C | 0. 19634300  | -3. 27097100 | 3. 57646200  |
| C | -2. 02211800 | -3. 24042400 | 2. 51693100  |

|   |             |             |             |
|---|-------------|-------------|-------------|
| C | -2.28356400 | -3.38984900 | 0.09524100  |
| C | -0.39193100 | -3.16892100 | 4.81172900  |
| H | 1.27698000  | -3.29112200 | 3.49975000  |
| C | -2.59542800 | -3.13193500 | 3.82344900  |
| C | -2.82688200 | -3.24291900 | 1.37405300  |
| C | -1.80875700 | -3.11443400 | 4.94354600  |
| H | 0.23069400  | -3.12261700 | 5.70160300  |
| H | -3.67747500 | -3.06414100 | 3.90439600  |
| H | -3.90399300 | -3.13605100 | 1.48405300  |
| H | -2.25793200 | -3.04230600 | 5.93026700  |
| C | 4.37964700  | 2.54600300  | -0.78387000 |
| C | 3.53802900  | 3.49605100  | -1.41457100 |
| C | 5.00903900  | 2.85793500  | 0.44859800  |
| C | 2.84553400  | 3.23061300  | -2.64020500 |
| C | 3.33534600  | 4.78973400  | -0.79951700 |
| C | 4.77390500  | 4.14490400  | 1.06431200  |
| C | 2.04541000  | 4.17588700  | -3.22562100 |
| H | 2.93248400  | 2.24907600  | -3.08832100 |
| C | 2.50068100  | 5.75186200  | -1.45087600 |
| C | 3.95123400  | 5.07468900  | 0.42194000  |
| C | 1.87760000  | 5.45946200  | -2.63301000 |
| H | 1.51435900  | 3.93655900  | -4.14216500 |
| H | 2.36979000  | 6.72247700  | -0.97810300 |
| H | 3.79139700  | 6.04807700  | 0.88191200  |
| H | 1.24107500  | 6.19592000  | -3.11562000 |
| C | -1.19695700 | -3.79636800 | -2.46727000 |
| H | -0.78893100 | -3.96918600 | -3.45940700 |
| C | -0.36386500 | -3.80660200 | -1.37957600 |
| H | 0.69304300  | -3.99936700 | -1.52043400 |
| C | -2.59285500 | -3.56199800 | -2.31654400 |
| H | -3.23824100 | -3.52923000 | -3.18879100 |
| C | -3.11858000 | -3.37949000 | -1.06644100 |
| H | -4.18526400 | -3.21636800 | -0.93753900 |
| C | 6.49167200  | 2.29378100  | 2.31096200  |
| H | 7.16683300  | 1.59196500  | 2.79325600  |
| C | 6.23422200  | 3.55219300  | 2.92500300  |
| H | 6.70824700  | 3.79769200  | 3.87146300  |
| C | 5.40257900  | 4.45010000  | 2.31256200  |
| H | 5.20863200  | 5.42206200  | 2.76056700  |
| C | 5.90385300  | 1.96190300  | 1.11823300  |
| H | 6.12489300  | 1.00367900  | 0.66233400  |
| C | -1.36556700 | 1.98705700  | 5.83470600  |
| H | -0.88204900 | 2.83275900  | 6.33842600  |
| H | -2.41564200 | 2.23535700  | 5.65450200  |

|   |             |            |            |
|---|-------------|------------|------------|
| H | -1.33248600 | 1.13210800 | 6.52026200 |
| C | 0.81804100  | 1.27536700 | 4.84291200 |
| H | 1.35518600  | 2.12746000 | 5.27702700 |
| H | 0.83597500  | 0.46572100 | 5.58208700 |
| H | 1.37097900  | 0.91780500 | 3.97046500 |
| H | -0.96212800 | 2.86754800 | 1.39407900 |

INT-9

0 imaginary frequencies

H = -4333.090486

G = -4333.270521

E(M06-2X-DCM) = -4333.893400

|   |             |             |             |
|---|-------------|-------------|-------------|
| C | 0.00049200  | -3.35021800 | 3.79353800  |
| C | 0.31241700  | -2.21523600 | 4.82514200  |
| H | -0.55409100 | -2.15882800 | 5.49503800  |
| H | 1.14989100  | -2.56063300 | 5.44149400  |
| C | 2.01354000  | -0.44282600 | 3.98047600  |
| C | 3.09872100  | -0.91333000 | 4.74011900  |
| C | 2.28926200  | 0.42542000  | 2.90950000  |
| C | 4.40529100  | -0.52462300 | 4.44593600  |
| H | 2.92767100  | -1.56883300 | 5.58842200  |
| C | 3.59452800  | 0.80687700  | 2.60835300  |
| H | 1.47310200  | 0.77710800  | 2.28588200  |
| C | 4.65981200  | 0.33404500  | 3.37730000  |
| H | 5.22525800  | -0.90031000 | 5.05207200  |
| H | 3.77783100  | 1.46757800  | 1.76646600  |
| H | 5.67939100  | 0.62285800  | 3.13733100  |
| C | 0.60965000  | -0.81186600 | 4.32185200  |
| C | 1.15703600  | -3.62806400 | 2.80049600  |
| H | 1.00183300  | -4.61917900 | 2.35106500  |
| H | 2.10912800  | -3.67798800 | 3.33803200  |
| N | 1.28667400  | -2.64249400 | 1.73743100  |
| C | 2.32516700  | -2.60949400 | 0.86287100  |
| N | 2.14035500  | -1.63517500 | -0.09985400 |
| C | 2.93865300  | -1.13676400 | -1.13137500 |
| C | 4.18353700  | -1.64518700 | -1.53480500 |
| C | 2.41154900  | -0.02177800 | -1.81575900 |
| C | 4.86748000  | -1.03784600 | -2.59060800 |
| C | 3.10998200  | 0.56366700  | -2.86444100 |
| H | 1.45636900  | 0.39192500  | -1.50903900 |
| C | 4.35104300  | 0.06449200  | -3.26736800 |
| H | 4.89791200  | 0.52248800  | -4.08249100 |
| C | 2.50521700  | 1.72024900  | -3.60973500 |
| C | 6.23424700  | -1.55610000 | -2.95962300 |



|   |              |              |              |
|---|--------------|--------------|--------------|
| F | 1. 87686300  | 1. 32555100  | -4. 74585100 |
| F | 3. 43517700  | 2. 62965800  | -3. 97757500 |
| F | 1. 57755200  | 2. 38043100  | -2. 86885400 |
| F | 6. 54476900  | -1. 28022000 | -4. 24804400 |
| F | 6. 33118000  | -2. 89145300 | -2. 79740000 |
| F | 7. 20079400  | -0. 99405900 | -2. 19631900 |
| S | 3. 63971400  | -3. 65875600 | 0. 97963300  |
| C | -0. 16456700 | -4. 64777200 | 4. 61646900  |
| H | -0. 91943600 | -4. 51917000 | 5. 40078900  |
| H | -0. 48328900 | -5. 47798100 | 3. 97623800  |
| H | 0. 77675300  | -4. 93744200 | 5. 09938600  |
| C | -1. 32762600 | -3. 06915500 | 3. 06772800  |
| H | -1. 54486100 | -3. 84828900 | 2. 33033900  |
| H | -2. 15512600 | -3. 04941900 | 3. 78766600  |
| H | -1. 33345500 | -2. 10669800 | 2. 54725800  |
| H | 4. 60062300  | -2. 50223000 | -1. 02490100 |
| C | -0. 37167700 | 0. 11235400  | 4. 26817500  |
| H | 1. 25230200  | -1. 14090000 | -0. 02259400 |
| H | -1. 38552100 | -0. 12843500 | 4. 58209300  |
| H | -0. 16396300 | 1. 15213500  | 4. 02977200  |
| H | 0. 46998400  | -2. 08299200 | 1. 51479400  |
| H | -1. 69310000 | 0. 60281500  | 2. 37045100  |
| O | -0. 95675500 | 1. 73893900  | -0. 41250500 |
| O | -2. 92151000 | 0. 06216500  | -0. 62617200 |
| P | -1. 59824700 | 0. 39876400  | 0. 23018200  |
| O | -0. 54131500 | -0. 64134300 | 0. 30439200  |
| C | -3. 38650700 | 5. 13315400  | -0. 82538100 |
| C | -3. 44796700 | 4. 10543600  | -1. 76020400 |
| C | -2. 58497700 | 3. 00183700  | -1. 67076500 |
| C | -1. 60981400 | 3. 94240000  | 0. 36241700  |
| C | -2. 44990500 | 5. 05776300  | 0. 20456900  |
| C | -2. 71278600 | -0. 34469300 | -1. 96430400 |
| C | -2. 49610100 | 0. 62822100  | -2. 93649800 |
| C | -2. 09069300 | 0. 22834500  | -4. 21932800 |
| C | -2. 03058300 | -1. 12100700 | -4. 55171000 |
| C | -2. 38221100 | -2. 07269500 | -3. 59540100 |
| C | -2. 71302800 | -1. 71604600 | -2. 27584700 |
| H | -2. 36598200 | 5. 86895100  | 0. 92154200  |
| H | -2. 37931900 | -3. 12680400 | -3. 85517800 |
| C | -2. 72124800 | 2. 13488700  | -2. 91618400 |
| C | -4. 19062300 | 2. 48009000  | -3. 33715900 |
| H | -4. 37546600 | 2. 27908800  | -4. 39670600 |
| H | -4. 88177500 | 1. 86073200  | -2. 75368900 |
| H | -0. 78803500 | 1. 31807000  | -5. 57840100 |

|   |             |             |             |
|---|-------------|-------------|-------------|
| H | -2.50874900 | 1.59486600  | -5.85227100 |
| C | -1.73098100 | 2.90244100  | -0.57589000 |
| H | -4.05001900 | 5.99103700  | -0.89782500 |
| H | -1.72475100 | -1.43524200 | -5.54618500 |
| C | -4.37005400 | 3.96361800  | -2.95107100 |
| H | -4.06460000 | 4.63057300  | -3.76918800 |
| H | -5.40894100 | 4.21597000  | -2.71062900 |
| C | -1.75266200 | 1.43194600  | -5.07193900 |
| C | -1.73122300 | 2.58416700  | -4.04225800 |
| H | -2.00419800 | 3.55346100  | -4.47071800 |
| H | -0.72646700 | 2.67519300  | -3.61998600 |
| C | -3.09258900 | -2.78957200 | -1.30592000 |
| C | -4.42717000 | -2.86760300 | -0.83199200 |
| C | -2.15166400 | -3.79033300 | -0.95740600 |
| C | -5.43809300 | -1.91351500 | -1.17673000 |
| C | -4.81848000 | -3.97266300 | 0.01388100  |
| C | -2.56974200 | -4.90890200 | -0.14160000 |
| C | -6.71755700 | -2.02040900 | -0.69745600 |
| H | -5.18402100 | -1.09394200 | -1.83897300 |
| C | -6.16242200 | -4.04436700 | 0.49745600  |
| C | -3.88540700 | -4.96520900 | 0.32516500  |
| C | -7.08806300 | -3.09518400 | 0.15920100  |
| H | -7.46154500 | -1.27928300 | -0.97716100 |
| H | -6.43273600 | -4.87970100 | 1.13917400  |
| H | -4.19296500 | -5.80603900 | 0.94384500  |
| H | -8.10648800 | -3.16154400 | 0.53198400  |
| C | -0.60665200 | 3.94516400  | 1.47298400  |
| C | 0.76922200  | 4.11153200  | 1.17294300  |
| C | -1.04355300 | 3.90119800  | 2.81958800  |
| C | 1.27486900  | 4.16122100  | -0.16577700 |
| C | 1.72040100  | 4.25518100  | 2.25196000  |
| C | -0.07980700 | 4.05119200  | 3.88793100  |
| C | 2.61208400  | 4.32106800  | -0.42036700 |
| H | 0.58454000  | 4.06372300  | -0.99461200 |
| C | 3.10561300  | 4.43427400  | 1.94402100  |
| C | 1.27104300  | 4.22620100  | 3.57515600  |
| C | 3.54344300  | 4.46436500  | 0.64713400  |
| H | 2.96519000  | 4.32956500  | -1.44737700 |
| H | 3.80497000  | 4.54158500  | 2.76942900  |
| H | 1.99177300  | 4.33947300  | 4.38206500  |
| H | 4.59887900  | 4.59771200  | 0.42630000  |
| C | 0.09988200  | -4.74389900 | -1.03000000 |
| H | 1.13947300  | -4.67745400 | -1.33644100 |
| C | -0.77903100 | -3.74724100 | -1.36695700 |

|   |             |             |             |
|---|-------------|-------------|-------------|
| H | -0.43019500 | -2.89618200 | -1.93971100 |
| C | -0.32803800 | -5.86100500 | -0.25660700 |
| H | 0.38347100  | -6.64298800 | -0.00709100 |
| C | -1.62436800 | -5.93478900 | 0.17723100  |
| H | -1.96287100 | -6.77619700 | 0.77764600  |
| C | -2.80316000 | 3.66333500  | 4.50068600  |
| H | -3.84876800 | 3.50237100  | 4.74915400  |
| C | -1.85220200 | 3.83142900  | 5.54787500  |
| H | -2.18067200 | 3.80505300  | 6.58315000  |
| C | -0.53021300 | 4.01591800  | 5.24565100  |
| H | 0.20837900  | 4.13485600  | 6.03465300  |
| C | -2.41468600 | 3.69723800  | 3.18635100  |
| H | -3.14956200 | 3.55337100  | 2.40292400  |
| O | -2.29016800 | 0.78364800  | 1.61442000  |

INT-9'

0 imaginary frequencies

H = -4333.080397

G = -4333.257910

E(M06-2X-DCM) = -4333.881586

|   |             |             |             |
|---|-------------|-------------|-------------|
| O | -0.29282000 | -2.77302700 | 0.13750400  |
| O | -2.45691200 | -1.37909300 | -0.11867600 |
| P | -0.82473000 | -1.20314400 | 0.11693500  |
| O | -0.33854900 | -0.54077900 | -1.16759400 |
| C | -1.01198000 | -5.11662700 | -3.25453900 |
| C | -1.97409500 | -4.99401900 | -2.25698400 |
| C | -1.70491700 | -4.26528700 | -1.08949500 |
| C | 0.49922200  | -3.69127400 | -1.96041400 |
| C | 0.22180000  | -4.48803200 | -3.08423700 |
| C | -3.16438600 | -1.99536300 | 0.90527700  |
| C | -3.23763000 | -3.38852400 | 0.94616200  |
| C | -3.80797600 | -4.01482800 | 2.06492100  |
| C | -4.38987600 | -3.26455700 | 3.08140500  |
| C | -4.40050600 | -1.87370100 | 2.97363500  |
| C | -3.78300200 | -1.21219600 | 1.90008300  |
| H | 0.98905300  | -4.59052700 | -3.84656800 |
| H | -4.87529700 | -1.27440200 | 3.74542100  |
| C | -2.84421900 | -4.43830000 | -0.09025800 |
| C | -4.02668100 | -4.74237200 | -1.07183500 |
| H | -4.41647600 | -3.79253200 | -1.45582900 |
| H | -4.85231500 | -5.26892500 | -0.58251600 |
| H | -4.60155700 | -6.00235100 | 1.70519300  |
| H | -3.32314600 | -5.96532500 | 2.91526700  |
| C | -0.50047300 | -3.57187400 | -0.97191000 |

|   |             |             |             |
|---|-------------|-------------|-------------|
| H | -1.21263100 | -5.69113300 | -4.15555800 |
| H | -4.83306300 | -3.74916600 | 3.94787200  |
| C | -3.38383200 | -5.54395900 | -2.22501000 |
| H | -3.90943200 | -5.41105400 | -3.17779300 |
| H | -3.38645800 | -6.62251800 | -2.01238400 |
| C | -3.65121100 | -5.51733500 | 1.97022500  |
| C | -2.60704200 | -5.67275500 | 0.84313100  |
| H | -1.59734900 | -5.60462700 | 1.26384900  |
| H | -2.68303700 | -6.62410300 | 0.30665200  |
| C | -3.84795300 | 0.28272300  | 1.83448100  |
| C | -3.13297500 | 1.07195400  | 2.76734600  |
| C | -4.70955900 | 0.90104700  | 0.89398300  |
| C | -2.20623500 | 0.50940300  | 3.70406100  |
| C | -3.31471500 | 2.50657000  | 2.77921100  |
| C | -4.86564300 | 2.33821400  | 0.90211800  |
| C | -1.53338200 | 1.29757400  | 4.60014300  |
| H | -2.00926100 | -0.55382500 | 3.66318300  |
| C | -2.60422700 | 3.29217800  | 3.74214400  |
| C | -4.17487100 | 3.09962600  | 1.85007100  |
| C | -1.74207900 | 2.70663500  | 4.63030500  |
| H | -0.81456900 | 0.84857900  | 5.27930000  |
| H | -2.76736700 | 4.36764800  | 3.75029900  |
| H | -4.31197800 | 4.17933600  | 1.86596800  |
| H | -1.20849000 | 3.31362100  | 5.35747000  |
| C | 1.82889700  | -3.01231900 | -1.85267100 |
| C | 2.19427900  | -2.01904700 | -2.79664900 |
| C | 2.75066400  | -3.40467800 | -0.84961400 |
| C | 1.29850000  | -1.54430900 | -3.80982400 |
| C | 3.51343000  | -1.42843800 | -2.74377400 |
| C | 4.05039000  | -2.77502600 | -0.78299800 |
| C | 1.68794400  | -0.59955900 | -4.72452700 |
| H | 0.28955200  | -1.93690900 | -3.83435200 |
| C | 3.88107600  | -0.44725900 | -3.71908000 |
| C | 4.40164100  | -1.81512600 | -1.73625500 |
| C | 3.00068100  | -0.04643900 | -4.68802500 |
| H | 0.98909700  | -0.26896800 | -5.48920800 |
| H | 4.88618400  | -0.03262600 | -3.67697600 |
| H | 5.38532900  | -1.35359800 | -1.68384400 |
| H | 3.29727700  | 0.69192700  | -5.42863400 |
| C | -6.29498900 | 0.78391300  | -0.96489600 |
| H | -6.85727600 | 0.19349800  | -1.68358100 |
| C | -5.46721300 | 0.15897700  | -0.06887700 |
| H | -5.38020600 | -0.92137300 | -0.07980800 |
| C | -6.43344600 | 2.20141800  | -0.96099400 |

|   |             |             |             |
|---|-------------|-------------|-------------|
| H | -7.09874100 | 2.68021900  | -1.67492800 |
| C | -5.73992400 | 2.95214300  | -0.04965400 |
| H | -5.84333600 | 4.03472300  | -0.02828000 |
| C | 3.36791200  | -4.77244400 | 1.07908700  |
| H | 3.11966500  | -5.54934400 | 1.79711800  |
| C | 4.63204200  | -4.12190800 | 1.16105500  |
| H | 5.33119400  | -4.40159300 | 1.94459200  |
| C | 4.96215200  | -3.15353300 | 0.25239800  |
| H | 5.92075200  | -2.64298900 | 0.30225600  |
| C | 2.46197700  | -4.42613900 | 0.11142200  |
| H | 1.50457200  | -4.93147000 | 0.06497200  |
| C | -1.68889600 | 2.76594200  | -3.39065100 |
| C | -2.49251400 | 3.42314200  | -2.22322700 |
| H | -3.55520500 | 3.29479100  | -2.45591100 |
| H | -2.31583100 | 2.83544200  | -1.31608200 |
| C | -1.17076700 | 5.29569600  | -0.97659700 |
| C | -0.32082800 | 6.38710400  | -1.24394800 |
| C | -1.03527600 | 4.64344000  | 0.26278700  |
| C | 0.60700900  | 6.82782600  | -0.29706600 |
| H | -0.39622900 | 6.89290300  | -2.20291700 |
| C | -0.11195500 | 5.08712000  | 1.21025200  |
| H | -1.68250000 | 3.80849700  | 0.51137700  |
| C | 0.71122300  | 6.18218900  | 0.93679000  |
| H | 1.24779200  | 7.67546100  | -0.52651300 |
| H | -0.04796000 | 4.57501700  | 2.16624900  |
| H | 1.43075400  | 6.52479800  | 1.67516800  |
| C | -2.23072600 | 4.89694400  | -1.94992900 |
| C | -0.16298800 | 2.79970800  | -3.14188900 |
| H | 0.16250800  | 3.83520900  | -3.02875100 |
| H | 0.35263100  | 2.38653000  | -4.02003000 |
| N | 0.24627700  | 2.02400800  | -1.96684500 |
| C | 1.38227100  | 2.11763800  | -1.28128100 |
| N | 1.75581800  | 1.06444800  | -0.55576100 |
| C | 2.77441700  | 0.97852900  | 0.43732500  |
| C | 4.11582800  | 1.15451800  | 0.09962400  |
| C | 2.40216700  | 0.62219700  | 1.73800600  |
| C | 5.09550200  | 1.00129600  | 1.08177300  |
| C | 3.39550100  | 0.48425000  | 2.70799400  |
| H | 1.35388400  | 0.43350600  | 1.96328000  |
| C | 4.74133900  | 0.67374300  | 2.38959300  |
| H | 5.50405000  | 0.56462600  | 3.15084900  |
| C | 3.00408300  | 0.07983500  | 4.10870500  |
| C | 6.54360600  | 1.09733900  | 0.68484300  |
| F | 1.84970200  | 0.66673000  | 4.48950000  |

|   |             |             |             |
|---|-------------|-------------|-------------|
| F | 3.95296100  | 0.42930800  | 5.00868000  |
| F | 2.83009400  | -1.25246700 | 4.21234300  |
| F | 6.97768400  | -0.05995000 | 0.11732400  |
| F | 7.34692800  | 1.34314700  | 1.73818400  |
| F | 6.74925800  | 2.07177300  | -0.22798700 |
| S | 2.41302000  | 3.55888200  | -1.28433900 |
| H | 4.39663900  | 1.37399600  | -0.92431600 |
| H | 1.09865800  | 0.25432300  | -0.65276400 |
| H | -0.23450700 | 1.11719900  | -1.80950200 |
| C | -2.97293100 | 5.84664800  | -2.54232400 |
| H | -3.76773600 | 5.59283700  | -3.23855400 |
| H | 1.40722300  | 4.43582200  | -1.49429800 |
| H | -2.83142900 | 6.90294000  | -2.33155500 |
| C | -2.18425300 | 1.31227100  | -3.55098100 |
| H | -3.23516400 | 1.30992700  | -3.86090400 |
| H | -1.60739800 | 0.78495800  | -4.32066100 |
| H | -2.11928200 | 0.72907200  | -2.62675400 |
| C | -1.92889300 | 3.51285100  | -4.71691600 |
| H | -1.41629200 | 3.00864900  | -5.54488200 |
| H | -2.99834000 | 3.53310500  | -4.95444200 |
| H | -1.57802300 | 4.54900400  | -4.67631700 |
| O | -0.47841000 | -0.61360800 | 1.44028700  |

TS-EF-1S'

l imaginary frequencies

H = -4333.064446

G = -4333.238914

E(M06-2X-DCM) = -4333.863838

|   |             |            |             |
|---|-------------|------------|-------------|
| O | 0.57996300  | 2.50407500 | 0.39855000  |
| O | 2.61980400  | 1.10981200 | -0.39729800 |
| P | 1.01524100  | 0.94808700 | 0.02085000  |
| O | 0.34572000  | 0.55431000 | -1.28646600 |
| C | 0.70904400  | 5.28089400 | -2.73822900 |
| C | 1.85589000  | 4.96876200 | -2.01622800 |
| C | 1.79117600  | 4.10968900 | -0.90948200 |
| C | -0.59273000 | 3.79430000 | -1.29061200 |
| C | -0.50568400 | 4.72143500 | -2.34429900 |
| C | 3.51105400  | 1.60577900 | 0.54213500  |
| C | 3.65416700  | 2.98865100 | 0.68696000  |
| C | 4.46197400  | 3.49984000 | 1.71428000  |
| C | 5.20328500  | 2.65088700 | 2.52816000  |
| C | 5.12856700  | 1.27777800 | 2.30796800  |
| C | 4.28131900  | 0.72602000 | 1.33090300  |
| H | -1.41665200 | 4.98400300 | -2.87432000 |

|   |              |              |              |
|---|--------------|--------------|--------------|
| H | 5. 72166800  | 0. 60052800  | 2. 91563100  |
| C | 3. 11875000  | 4. 13639900  | -0. 16276000 |
| C | 4. 09171400  | 4. 48744300  | -1. 33749100 |
| H | 4. 33007000  | 3. 56647700  | -1. 88216000 |
| H | 5. 03337200  | 4. 92205100  | -0. 98692500 |
| H | 5. 27156700  | 5. 47994200  | 1. 35930400  |
| H | 4. 25649500  | 5. 38399300  | 2. 79478500  |
| C | 0. 59351100  | 3. 46324400  | -0. 60219400 |
| H | 0. 75012600  | 5. 95725100  | -3. 58856300 |
| H | 5. 83489300  | 3. 04611900  | 3. 31986000  |
| C | 3. 27762400  | 5. 43546000  | -2. 24575600 |
| H | 3. 57511700  | 5. 37099400  | -3. 29901400 |
| H | 3. 40736200  | 6. 48539800  | -1. 94733900 |
| C | 4. 36774600  | 5. 00844400  | 1. 77100000  |
| C | 3. 13331700  | 5. 29479000  | 0. 89201300  |
| H | 2. 22382200  | 5. 22505700  | 1. 49965900  |
| H | 3. 14834300  | 6. 28504100  | 0. 42598600  |
| C | 4. 29290700  | -0. 76181900 | 1. 16945100  |
| C | 3. 85570400  | -1. 58430800 | 2. 23694700  |
| C | 4. 89293800  | -1. 34720600 | 0. 02649300  |
| C | 3. 21128100  | -1. 05501300 | 3. 40244100  |
| C | 4. 06481100  | -3. 01331400 | 2. 17581000  |
| C | 5. 05321500  | -2. 78318300 | -0. 04251300 |
| C | 2. 86314600  | -1. 86503900 | 4. 45182800  |
| H | 2. 97961000  | 0. 00233500  | 3. 43284200  |
| C | 3. 69028200  | -3. 82192500 | 3. 29468700  |
| C | 4. 64413100  | -3. 57476800 | 1. 03477600  |
| C | 3. 12065700  | -3. 26561500 | 4. 40783200  |
| H | 2. 37503400  | -1. 43778600 | 5. 32365900  |
| H | 3. 87186600  | -4. 89282700 | 3. 23923600  |
| H | 4. 79981200  | -4. 65126000 | 0. 99268800  |
| H | 2. 84914400  | -3. 88976100 | 5. 25536500  |
| C | -1. 93562700 | 3. 23879400  | -0. 93656400 |
| C | -2. 66529100 | 2. 49334100  | -1. 89755100 |
| C | -2. 52815500 | 3. 54856900  | 0. 31454000  |
| C | -2. 10988900 | 2. 09882500  | -3. 15949500 |
| C | -4. 02200800 | 2. 08471200  | -1. 61011600 |
| C | -3. 86948800 | 3. 09289700  | 0. 60423100  |
| C | -2. 84981200 | 1. 40081400  | -4. 07870200 |
| H | -1. 07653900 | 2. 34594100  | -3. 37081200 |
| C | -4. 76187800 | 1. 36193500  | -2. 59948900 |
| C | -4. 58414600 | 2. 38680900  | -0. 36725800 |
| C | -4. 19905000 | 1. 03426400  | -3. 80372000 |
| H | -2. 40248400 | 1. 11640700  | -5. 02788100 |

|   |             |             |             |
|---|-------------|-------------|-------------|
| H | -5.78168000 | 1.06840500  | -2.36135900 |
| H | -5.59398100 | 2.04813400  | -0.14615000 |
| H | -4.77162500 | 0.48645300  | -4.54752400 |
| C | 6.00032900  | -1.16271800 | -2.14717400 |
| H | 6.38251700  | -0.54662800 | -2.95676500 |
| C | 5.40178500  | -0.57142800 | -1.06480100 |
| H | 5.31487600  | 0.50787600  | -1.02147400 |
| C | 6.13385300  | -2.57936800 | -2.22068000 |
| H | 6.61625300  | -3.03149700 | -3.08353700 |
| C | 5.67194600  | -3.36199900 | -1.19597900 |
| H | 5.78761200  | -4.44341800 | -1.22846100 |
| C | -2.45962500 | 4.59476900  | 2.52289300  |
| H | -1.92820700 | 5.18230700  | 3.26675100  |
| C | -3.76715400 | 4.11345600  | 2.81481400  |
| H | -4.21867600 | 4.33022000  | 3.77912000  |
| C | -4.45084800 | 3.38948300  | 1.87684700  |
| H | -5.45612800 | 3.02694500  | 2.07854000  |
| C | -1.86524300 | 4.32543800  | 1.31822900  |
| H | -0.87193500 | 4.70632800  | 1.11414900  |
| C | 1.45599100  | -2.81340300 | -3.63207500 |
| C | 1.64008300  | -3.49491400 | -2.23387600 |
| H | 2.52701100  | -4.14618700 | -2.30338200 |
| H | 1.93527900  | -2.73120500 | -1.51200100 |
| C | 0.39968700  | -4.31660700 | -0.15046400 |
| C | 0.56253500  | -3.11947600 | 0.58110100  |
| C | -0.00509400 | -5.47747300 | 0.54987300  |
| C | 0.28934600  | -3.07414200 | 1.94463700  |
| H | 0.83941700  | -2.19084600 | 0.09686600  |
| C | -0.24214800 | -5.43588800 | 1.91779900  |
| H | -0.08974600 | -6.42280300 | 0.02270400  |
| C | -0.10881700 | -4.23086100 | 2.61612000  |
| H | 0.39637400  | -2.12726700 | 2.46192600  |
| H | -0.53219700 | -6.34242000 | 2.44161300  |
| H | -0.31123100 | -4.19488300 | 3.68270200  |
| C | 0.56435300  | -4.34821500 | -1.60683900 |
| C | 0.00989300  | -2.29254300 | -3.86501300 |
| H | -0.67099500 | -3.09273000 | -4.15246500 |
| H | 0.03723400  | -1.58249300 | -4.70290700 |
| N | -0.53861500 | -1.61511700 | -2.70245800 |
| C | -1.70237600 | -1.84675200 | -2.07666000 |
| N | -1.98999800 | -0.96757200 | -1.09580400 |
| C | -2.97856600 | -1.03276200 | -0.08465600 |
| C | -4.32320700 | -1.28245000 | -0.36517300 |
| C | -2.57266700 | -0.75032200 | 1.22507300  |



|   |             |             |             |
|---|-------------|-------------|-------------|
| C | -5.25487300 | -1.26281700 | 0.67208800  |
| C | -3.51660500 | -0.75449200 | 2.25212900  |
| H | -1.52700300 | -0.53042500 | 1.43165800  |
| C | -4.86151700 | -1.00987900 | 1.98623100  |
| H | -5.59023200 | -1.00792600 | 2.78701500  |
| C | -3.06252800 | -0.44553800 | 3.65590400  |
| C | -6.71195000 | -1.40567100 | 0.32811700  |
| F | -1.91377000 | -1.09471000 | 3.95795500  |
| F | -3.98492400 | -0.81479800 | 4.57476700  |
| F | -2.83062500 | 0.87053600  | 3.82987900  |
| F | -7.20985000 | -0.24431700 | -0.17897300 |
| F | -7.46571300 | -1.71823400 | 1.40207000  |
| F | -6.92115400 | -2.35292600 | -0.61040800 |
| S | -2.72563300 | -3.20158200 | -2.46562100 |
| H | -4.64506200 | -1.44955300 | -1.38429800 |
| H | -1.26292000 | -0.23934600 | -0.96895800 |
| H | -0.00992000 | -0.80409500 | -2.33491900 |
| C | -0.33247000 | -5.10700500 | -2.36499800 |
| H | -0.09761400 | -5.32589900 | -3.40332900 |
| H | -1.36803400 | -4.24819600 | -2.46348000 |
| H | -0.89895200 | -5.88698500 | -1.85671000 |
| C | 2.43612600  | -1.61813000 | -3.66292600 |
| H | 3.46078400  | -1.95184800 | -3.46941700 |
| H | 2.41892800  | -1.13463400 | -4.64718600 |
| H | 2.19324800  | -0.86185000 | -2.90791700 |
| C | 1.81749100  | -3.75538800 | -4.79890100 |
| H | 1.69528100  | -3.23977300 | -5.75900100 |
| H | 2.86445400  | -4.07039400 | -4.72663400 |
| H | 1.19817800  | -4.65761900 | -4.83205100 |
| O | 0.82565400  | 0.12284000  | 1.25052500  |

TS-EF-1S'-1

l imaginary frequencies

H = -4333.066311

G = -4333.238693

E(M06-2X-DCM) = -4333.856208

|   |             |             |             |
|---|-------------|-------------|-------------|
| O | -2.81488900 | 1.14219200  | -0.00930100 |
| O | -0.61427000 | 1.98821700  | -1.08335500 |
| P | -1.17596800 | 0.96599100  | 0.10129600  |
| O | -0.73039700 | -0.41129600 | -0.33025600 |
| C | -4.62619700 | 0.15288500  | -3.66326000 |
| C | -4.04514400 | 1.40112600  | -3.47382400 |
| C | -3.51080100 | 1.76437600  | -2.22782100 |
| C | -4.07860300 | -0.43656100 | -1.35007300 |

|   |             |             |             |
|---|-------------|-------------|-------------|
| C | -4.66743700 | -0.73569600 | -2.59256000 |
| C | -0.83582600 | 3.35039900  | -0.96031500 |
| C | -2.04699700 | 3.87998900  | -1.40718800 |
| C | -2.34947900 | 5.22917000  | -1.17361900 |
| C | -1.40227400 | 6.07936700  | -0.61389600 |
| C | -0.15322300 | 5.56237600  | -0.27646000 |
| C | 0.15397100  | 4.19599600  | -0.41500200 |
| H | -5.14976800 | -1.70097400 | -2.71274300 |
| H | 0.60786300  | 6.22098600  | 0.13124400  |
| C | -3.15030300 | 3.24664700  | -2.24425500 |
| C | -2.86960100 | 3.44893700  | -3.77183700 |
| H | -1.84679900 | 3.11827900  | -3.98614000 |
| H | -2.95277900 | 4.49655100  | -4.07765800 |
| H | -3.78126900 | 6.12755700  | -2.53481900 |
| H | -4.31246600 | 6.12674900  | -0.85683400 |
| C | -3.45837000 | 0.82123800  | -1.19773100 |
| H | -5.05037900 | -0.12634200 | -4.62449800 |
| H | -1.62265900 | 7.13091400  | -0.44736700 |
| C | -3.87597500 | 2.51866500  | -4.47888300 |
| H | -3.51274700 | 2.15860800  | -5.44843300 |
| H | -4.82962300 | 3.03073900  | -4.67080500 |
| C | -3.76607600 | 5.54104100  | -1.60530000 |
| C | -4.36724000 | 4.13423900  | -1.81674700 |
| H | -4.76261900 | 3.75396000  | -0.86776900 |
| H | -5.17991800 | 4.11316300  | -2.54970500 |
| C | 1.51560500  | 3.73669200  | -0.00050800 |
| C | 1.94765300  | 3.95527700  | 1.33418300  |
| C | 2.42230500  | 3.20922100  | -0.95555200 |
| C | 1.07277200  | 4.43112100  | 2.36575600  |
| C | 3.32257100  | 3.69388700  | 1.69764500  |
| C | 3.77655000  | 2.89036000  | -0.55915100 |
| C | 1.53696000  | 4.70911300  | 3.62667200  |
| H | 0.02146500  | 4.55685100  | 2.13827200  |
| C | 3.76752400  | 3.99896800  | 3.02337900  |
| C | 4.19437400  | 3.15530100  | 0.74775600  |
| C | 2.90837500  | 4.51039700  | 3.95903700  |
| H | 0.85025200  | 5.07891700  | 4.38380200  |
| H | 4.81152200  | 3.81711900  | 3.26810200  |
| H | 5.22426200  | 2.94563800  | 1.02921900  |
| H | 3.26276300  | 4.75116700  | 4.95808700  |
| C | -4.20682800 | -1.46259000 | -0.26907500 |
| C | -3.69500300 | -2.76713700 | -0.48970800 |
| C | -4.98494200 | -1.19703400 | 0.88684000  |
| C | -2.82555400 | -3.08384500 | -1.58588700 |

|   |             |             |             |
|---|-------------|-------------|-------------|
| C | -4.04545700 | -3.83915900 | 0.41458200  |
| C | -5.26263900 | -2.26412500 | 1.82299200  |
| C | -2.40707000 | -4.36949100 | -1.81988600 |
| H | -2.47739700 | -2.28072100 | -2.22429000 |
| C | -3.61053600 | -5.17089100 | 0.12069800  |
| C | -4.80725700 | -3.55709700 | 1.55112200  |
| C | -2.82975300 | -5.43522100 | -0.97306600 |
| H | -1.73277300 | -4.57386500 | -2.64533600 |
| H | -3.91648400 | -5.97022600 | 0.79206200  |
| H | -5.06121200 | -4.36449500 | 2.23537200  |
| H | -2.51454400 | -6.45269300 | -1.19087300 |
| C | 2.96589000  | 2.46756500  | -3.22152500 |
| H | 2.66652800  | 2.31178700  | -4.25444200 |
| C | 2.07263100  | 2.99863700  | -2.32832600 |
| H | 1.07732500  | 3.26491800  | -2.66166200 |
| C | 4.28402000  | 2.11509000  | -2.81482400 |
| H | 4.97007800  | 1.66795000  | -3.52763300 |
| C | 4.67637200  | 2.33276500  | -1.52182000 |
| H | 5.68546100  | 2.08507300  | -1.19982900 |
| C | -6.29767100 | 0.31159200  | 2.29414700  |
| H | -6.71091000 | 1.29939300  | 2.47963200  |
| C | -6.53857200 | -0.73513900 | 3.22856400  |
| H | -7.12802600 | -0.53737500 | 4.11996800  |
| C | -6.03855300 | -1.98657000 | 2.99222400  |
| H | -6.22838800 | -2.80129600 | 3.68743100  |
| C | -5.55464100 | 0.08705200  | 1.16499800  |
| H | -5.38957800 | 0.89640300  | 0.46498500  |
| C | 0.92072300  | 0.35722300  | 4.79542000  |
| C | 0.43687400  | -1.12495500 | 4.68474000  |
| H | 0.07506200  | -1.42582500 | 5.68288000  |
| H | -0.45308600 | -1.15277800 | 4.05202600  |
| C | 0.82012600  | -3.30013800 | 3.40551100  |
| C | -0.08240800 | -3.01525800 | 2.35706500  |
| C | 1.24386600  | -4.63633000 | 3.58594100  |
| C | -0.51270200 | -4.02482600 | 1.50398500  |
| H | -0.39671800 | -1.99698300 | 2.15432700  |
| C | 0.77501400  | -5.64806400 | 2.75659200  |
| H | 1.90518700  | -4.88351600 | 4.41064400  |
| C | -0.09520600 | -5.34220200 | 1.70657000  |
| H | -1.16792100 | -3.77880100 | 0.67734700  |
| H | 1.09034200  | -6.67368400 | 2.92584400  |
| H | -0.45242400 | -6.12540400 | 1.04472300  |
| C | 1.35825600  | -2.23356000 | 4.25150400  |
| C | 1.90904200  | 0.75213300  | 3.65992400  |

|   |              |              |              |
|---|--------------|--------------|--------------|
| H | 2. 92772900  | 0. 45397600  | 3. 90447700  |
| H | 1. 90570000  | 1. 84358200  | 3. 57664200  |
| N | 1. 57761500  | 0. 20333800  | 2. 34609200  |
| C | 2. 41363200  | -0. 45217900 | 1. 52122800  |
| N | 1. 93961300  | -0. 69719800 | 0. 28039800  |
| C | 2. 53667000  | -1. 36336500 | -0. 81189900 |
| C | 3. 89179400  | -1. 25499700 | -1. 14678700 |
| C | 1. 67350000  | -2. 08684100 | -1. 64584600 |
| C | 4. 37448900  | -1. 90630500 | -2. 28027500 |
| C | 2. 17446900  | -2. 72839600 | -2. 77791100 |
| H | 0. 61409700  | -2. 11622300 | -1. 41431800 |
| C | 3. 52842700  | -2. 65537700 | -3. 09990000 |
| H | 3. 91483100  | -3. 15685700 | -3. 97907900 |
| C | 1. 23420800  | -3. 54541400 | -3. 62395600 |
| C | 5. 81283100  | -1. 72932600 | -2. 68811000 |
| F | 0. 96591600  | -4. 74812000 | -3. 05580300 |
| F | 1. 73809200  | -3. 79438400 | -4. 85117000 |
| F | 0. 04232200  | -2. 92755100 | -3. 79107300 |
| F | 5. 94162800  | -0. 80012100 | -3. 66975000 |
| F | 6. 33781700  | -2. 87561300 | -3. 17556500 |
| F | 6. 59166600  | -1. 32670100 | -1. 66272600 |
| S | 3. 97323400  | -1. 02723100 | 2. 05281500  |
| H | 4. 55861600  | -0. 65043800 | -0. 54968900 |
| H | 0. 92754000  | -0. 49642000 | 0. 10563800  |
| H | 0. 70356100  | 0. 60230600  | 1. 93868000  |
| C | 2. 72482600  | -2. 25629900 | 4. 57098600  |
| H | 3. 08039600  | -1. 63849400 | 5. 39179900  |
| H | 3. 24623500  | -1. 67922200 | 3. 52499300  |
| H | 3. 24752700  | -3. 20757200 | 4. 46698300  |
| C | -0. 35131100 | 1. 23262300  | 4. 72028400  |
| H | -1. 07509300 | 0. 92462100  | 5. 48516900  |
| H | -0. 09752700 | 2. 28283300  | 4. 90190700  |
| H | -0. 83185000 | 1. 17623800  | 3. 73891900  |
| C | 1. 61532100  | 0. 65568500  | 6. 14126100  |
| H | 1. 92320400  | 1. 70702700  | 6. 17857600  |
| H | 0. 92738700  | 0. 48374600  | 6. 97718200  |
| H | 2. 51108700  | 0. 05034400  | 6. 31329400  |
| O | -0. 77579700 | 1. 46482400  | 1. 46486200  |

TS-EF-1R'

l imaginary frequencies

H = -4333. 068995

G = -4333. 244472

E(M06-2X-DCM) = -4333. 860937

|   |             |             |             |
|---|-------------|-------------|-------------|
| O | -2.73607500 | -0.94156900 | 0.27477500  |
| O | -2.29654300 | 1.12692600  | -1.21337100 |
| P | -1.50996100 | 0.06375300  | -0.22312900 |
| O | -0.52808700 | -0.67284000 | -1.09431000 |
| C | -4.43158900 | -3.31723400 | -2.73002200 |
| C | -4.87346800 | -2.01556200 | -2.51821300 |
| C | -4.37029600 | -1.25577300 | -1.45215400 |
| C | -2.88549500 | -3.08785100 | -0.84607000 |
| C | -3.47092700 | -3.85077300 | -1.87112000 |
| C | -3.35771200 | 1.87508300  | -0.72709300 |
| C | -4.64101800 | 1.32209300  | -0.70651300 |
| C | -5.69236900 | 2.03886600  | -0.11381700 |
| C | -5.49816400 | 3.33205300  | 0.35845100  |
| C | -4.23550400 | 3.90791100  | 0.23859300  |
| C | -3.14243500 | 3.19778100  | -0.28802600 |
| H | -3.13590800 | -4.87508100 | -2.00675400 |
| H | -4.07278500 | 4.92782600  | 0.57469700  |
| C | -5.17959000 | 0.02638100  | -1.30688200 |
| C | -5.65144400 | 0.22397300  | -2.78640200 |
| H | -4.84444600 | 0.70490400  | -3.35097000 |
| H | -6.53888900 | 0.86044100  | -2.86251700 |
| H | -7.67458300 | 1.54239600  | -0.83929000 |
| H | -7.47054000 | 1.26646500  | 0.88753900  |
| C | -3.32949500 | -1.76067500 | -0.67409200 |
| H | -4.82678400 | -3.91550000 | -3.54725700 |
| H | -6.31531000 | 3.89068500  | 0.80815300  |
| C | -5.87630600 | -1.21005900 | -3.31668400 |
| H | -5.71231800 | -1.29105300 | -4.39745400 |
| H | -6.90459800 | -1.55006600 | -3.12873600 |
| C | -6.95546400 | 1.20726700  | -0.07833500 |
| C | -6.42711800 | -0.20797400 | -0.38865400 |
| H | -6.09379300 | -0.68902400 | 0.53821200  |
| H | -7.17221700 | -0.86069700 | -0.85411800 |
| C | -1.82907000 | 3.90767400  | -0.38527800 |
| C | -1.18811200 | 4.35520400  | 0.79686300  |
| C | -1.29919900 | 4.25645600  | -1.65278400 |
| C | -1.63796000 | 3.98621000  | 2.10658500  |
| C | -0.03036000 | 5.21553500  | 0.70516700  |
| C | -0.11449500 | 5.08229700  | -1.73022000 |
| C | -1.02548800 | 4.46998600  | 3.23417600  |
| H | -2.46981500 | 3.29820700  | 2.19433700  |
| C | 0.57468900  | 5.70368900  | 1.90623400  |
| C | 0.47596500  | 5.55282700  | -0.55329800 |
| C | 0.08910400  | 5.35211300  | 3.13653900  |

|   |             |             |             |
|---|-------------|-------------|-------------|
| H | -1.39232300 | 4.17725600  | 4.21478800  |
| H | 1.43572900  | 6.36209400  | 1.81702300  |
| H | 1.34639100  | 6.20320500  | -0.61918000 |
| H | 0.55554300  | 5.73480400  | 4.04068500  |
| C | -1.84001400 | -3.71528800 | 0.01982400  |
| C | -0.62036900 | -4.15524000 | -0.55327200 |
| C | -2.10152000 | -3.95129500 | 1.39365800  |
| C | -0.27682900 | -3.91536800 | -1.92437100 |
| C | 0.34184200  | -4.86249100 | 0.26217500  |
| C | -1.11900800 | -4.63795000 | 2.20244500  |
| C | 0.90085500  | -4.37388900 | -2.45582900 |
| H | -0.95638200 | -3.33567600 | -2.53662600 |
| C | 1.55896600  | -5.32452900 | -0.33181200 |
| C | 0.07006400  | -5.07990900 | 1.61529100  |
| C | 1.83015900  | -5.09652600 | -1.65318400 |
| H | 1.14696600  | -4.16302300 | -3.49255300 |
| H | 2.26708400  | -5.85825300 | 0.29748400  |
| H | 0.80060400  | -5.60743300 | 2.22516600  |
| H | 2.75908100  | -5.44897900 | -2.09308800 |
| C | -1.36861000 | 4.20746200  | -4.09567000 |
| H | -1.84731000 | 3.88058100  | -5.01472100 |
| C | -1.90530200 | 3.85338100  | -2.88588100 |
| H | -2.80687600 | 3.25382400  | -2.85423100 |
| C | -0.18865100 | 5.00123800  | -4.16493900 |
| H | 0.22363300  | 5.27011600  | -5.13376400 |
| C | 0.41448500  | 5.42836100  | -3.01349800 |
| H | 1.30895200  | 6.04611700  | -3.05130000 |
| C | -3.54648500 | -3.79758000 | 3.36238300  |
| H | -4.48465100 | -3.48893200 | 3.81590700  |
| C | -2.56539500 | -4.45508800 | 4.15875700  |
| H | -2.76109800 | -4.64071400 | 5.21174300  |
| C | -1.38994100 | -4.86640800 | 3.58915200  |
| H | -0.63818500 | -5.38540500 | 4.17982300  |
| C | -3.32315700 | -3.55984000 | 2.03090400  |
| H | -4.08609200 | -3.06853300 | 1.43881500  |
| C | 0.19674400  | -0.24338200 | 4.53107500  |
| C | 1.09566300  | 1.02527900  | 4.30292700  |
| H | 1.12758900  | 1.57356600  | 5.25868600  |
| H | 0.57936200  | 1.69505500  | 3.61333900  |
| C | 3.06359700  | 1.76516400  | 2.81568400  |
| C | 2.25053700  | 2.20558400  | 1.74602000  |
| C | 4.43466700  | 2.11889300  | 2.79958600  |
| C | 2.80385300  | 2.91838500  | 0.68548600  |
| H | 1.20003100  | 1.93811000  | 1.69451100  |

|   |              |              |              |
|---|--------------|--------------|--------------|
| C | 4. 97462200  | 2. 85025500  | 1. 74942100  |
| H | 5. 07238100  | 1. 84761800  | 3. 63451500  |
| C | 4. 16255200  | 3. 23863100  | 0. 67962700  |
| H | 2. 16709400  | 3. 21799600  | -0. 14008800 |
| H | 6. 02859100  | 3. 11121900  | 1. 75839400  |
| H | 4. 59043400  | 3. 78649800  | -0. 15479700 |
| C | 2. 53458400  | 0. 89082500  | 3. 86873400  |
| C | 0. 53316600  | -1. 40101800 | 3. 54638400  |
| H | 1. 34918700  | -2. 01602100 | 3. 92424200  |
| H | -0. 34626700 | -2. 05147100 | 3. 46730600  |
| N | 0. 89330100  | -0. 94669100 | 2. 20696500  |
| C | 1. 94108100  | -1. 35077400 | 1. 47232800  |
| N | 1. 87765200  | -1. 05806800 | 0. 15543300  |
| C | 2. 91401700  | -0. 97489500 | -0. 79836800 |
| C | 4. 20796400  | -0. 53557700 | -0. 49678800 |
| C | 2. 56994500  | -1. 24398600 | -2. 12953900 |
| C | 5. 15004500  | -0. 40720100 | -1. 51672500 |
| C | 3. 52829700  | -1. 12213200 | -3. 13406600 |
| H | 1. 55279000  | -1. 53591700 | -2. 36409700 |
| C | 4. 82729200  | -0. 70775200 | -2. 84010400 |
| H | 5. 56692100  | -0. 61021500 | -3. 62467800 |
| C | 3. 15250600  | -1. 50362100 | -4. 54176500 |
| C | 6. 50407600  | 0. 15380800  | -1. 17533300 |
| F | 4. 01443800  | -1. 00088600 | -5. 45205400 |
| F | 3. 15147200  | -2. 85224800 | -4. 70513800 |
| F | 1. 91655400  | -1. 07431000 | -4. 86639900 |
| F | 6. 96777800  | -0. 32515600 | 0. 00026600  |
| F | 7. 42613300  | -0. 12351000 | -2. 12076600 |
| F | 6. 46409500  | 1. 50644100  | -1. 04925100 |
| S | 3. 28998600  | -2. 19586100 | 2. 18205300  |
| H | 4. 47852600  | -0. 28482400 | 0. 51949700  |
| H | 0. 92504300  | -0. 88942500 | -0. 25212900 |
| H | 0. 17936200  | -0. 35096500 | 1. 73256300  |
| C | 3. 36984200  | -0. 10022700 | 4. 40613500  |
| H | 3. 06395400  | -0. 59093600 | 5. 32645200  |
| H | 3. 28895900  | -1. 05668200 | 3. 49874400  |
| H | 4. 44747000  | 0. 03120600  | 4. 31309500  |
| C | -1. 26621100 | 0. 21205600  | 4. 32504500  |
| H | -1. 50625300 | 1. 04467200  | 4. 99817400  |
| H | -1. 95440600 | -0. 61052300 | 4. 55215500  |
| H | -1. 44953700 | 0. 53475200  | 3. 29561400  |
| C | 0. 31579100  | -0. 80436300 | 5. 96404100  |
| H | -0. 33867200 | -1. 67616200 | 6. 08134000  |
| H | 0. 00132200  | -0. 05532400 | 6. 69986600  |

|   |             |             |            |
|---|-------------|-------------|------------|
| H | 1.33082900  | -1.12402400 | 6.22136500 |
| O | -1.01922800 | 0.72824600  | 1.04342900 |

TS-1-1S

l imaginary frequencies

H = -4333.071361

G = -4333.246591

E(M06-2X-DCM) = -4333.864626

|   |             |             |             |
|---|-------------|-------------|-------------|
| C | -1.24939300 | -2.70181500 | 3.90488900  |
| C | -0.55669400 | -1.55088200 | 4.73252000  |
| H | -1.30681600 | -1.20086200 | 5.44970900  |
| H | 0.24061200  | -2.02257400 | 5.31184300  |
| C | 1.38423000  | -0.24702900 | 3.63752600  |
| C | 2.37734600  | -1.05993000 | 4.23148700  |
| C | 1.79256300  | 0.68241600  | 2.65011300  |
| C | 3.71311900  | -0.93683400 | 3.86783000  |
| H | 2.11767700  | -1.77952200 | 4.99800400  |
| C | 3.12283500  | 0.77868400  | 2.26716500  |
| H | 1.05649600  | 1.30160100  | 2.15085000  |
| C | 4.08940200  | -0.02402800 | 2.88160500  |
| H | 4.45714800  | -1.56967900 | 4.34095800  |
| H | 3.40672000  | 1.47656700  | 1.48742600  |
| H | 5.13099700  | 0.05556700  | 2.58361600  |
| C | -0.02172400 | -0.33221400 | 4.02084400  |
| C | -0.25243800 | -3.47776100 | 3.01353200  |
| H | -0.77434000 | -4.35793800 | 2.60954500  |
| H | 0.57975100  | -3.85542800 | 3.61320700  |
| N | 0.30722400  | -2.69583600 | 1.92830200  |
| C | 1.50160100  | -2.96023900 | 1.32356700  |
| N | 1.70243700  | -2.11868500 | 0.25327200  |
| C | 2.76244500  | -1.91012900 | -0.63117700 |
| C | 3.93450700  | -2.67749500 | -0.72011700 |
| C | 2.59858500  | -0.81924700 | -1.50961900 |
| C | 4.90545500  | -2.34315800 | -1.66688500 |
| C | 3.57683300  | -0.50981000 | -2.44726300 |
| H | 1.70139800  | -0.21095000 | -1.44297600 |
| C | 4.74640300  | -1.26758500 | -2.53875700 |
| H | 5.51011900  | -1.02576900 | -3.26721500 |
| C | 3.33701700  | 0.62216400  | -3.40863000 |
| C | 6.18915300  | -3.13219100 | -1.69527500 |
| F | 2.61555600  | 0.22851600  | -4.48740500 |
| F | 4.48911800  | 1.14683700  | -3.87786500 |
| F | 2.64043200  | 1.63816900  | -2.83497900 |
| F | 6.77857400  | -3.09226700 | -2.91237300 |



|   |             |             |             |
|---|-------------|-------------|-------------|
| F | 5.99535000  | -4.42956600 | -1.38126400 |
| F | 7.09057100  | -2.64330000 | -0.80922300 |
| S | 2.56048100  | -4.15976000 | 1.86508300  |
| C | -1.77053800 | -3.71255500 | 4.95059200  |
| H | -2.49470600 | -3.24176500 | 5.62491500  |
| H | -2.27271400 | -4.54974600 | 4.45387700  |
| H | -0.95540400 | -4.12288900 | 5.55874400  |
| C | -2.44970500 | -2.16990300 | 3.10302500  |
| H | -2.95579300 | -2.99427800 | 2.59035600  |
| H | -3.17981600 | -1.69518300 | 3.76955900  |
| H | -2.17536700 | -1.43229900 | 2.34551700  |
| H | 4.07435800  | -3.52014800 | -0.05767300 |
| C | -0.90097000 | 0.74871900  | 3.78163600  |
| H | 0.93148200  | -1.46172500 | 0.09837100  |
| H | -1.84119200 | 0.71538900  | 4.33202300  |
| H | -0.44853700 | 1.74120200  | 3.77242000  |
| H | -0.32711200 | -2.08006100 | 1.41931800  |
| H | -1.34814200 | 0.79892000  | 2.57138700  |
| O | -0.45691300 | 1.75144400  | -0.61550500 |
| O | -2.74650300 | 0.54370600  | -0.87721500 |
| P | -1.43829100 | 0.63842000  | 0.10552400  |
| O | -0.65236400 | -0.63828300 | 0.13315500  |
| C | -2.06517800 | 5.49252600  | -1.63925600 |
| C | -2.23803000 | 4.39282600  | -2.47198800 |
| C | -1.65000700 | 3.15676300  | -2.16316000 |
| C | -0.71068600 | 4.12026600  | -0.13255200 |
| C | -1.28126400 | 5.35253000  | -0.49686500 |
| C | -2.54057400 | -0.06910900 | -2.12029500 |
| C | -1.99343400 | 0.68080000  | -3.15926000 |
| C | -1.58010200 | 0.03740500  | -4.33498300 |
| C | -1.84150200 | -1.31542300 | -4.52546700 |
| C | -2.51921100 | -2.01878700 | -3.53029400 |
| C | -2.86392600 | -1.42790100 | -2.30099800 |
| H | -1.10207900 | 6.21025400  | 0.14484900  |
| H | -2.76786200 | -3.06452400 | -3.68427900 |
| C | -1.84372500 | 2.18669100  | -3.32223900 |
| C | -3.13679700 | 2.78401200  | -3.97749200 |
| H | -3.23942800 | 2.49734900  | -5.02855500 |
| H | -4.01215700 | 2.40093200  | -3.44024600 |
| H | 0.09269800  | 0.60390900  | -5.60805400 |
| H | -1.46264500 | 1.24551400  | -6.13596800 |
| C | -0.94976700 | 3.00945600  | -0.96426500 |
| H | -2.51962200 | 6.45064500  | -1.87823200 |
| H | -1.53586300 | -1.81989700 | -5.43854700 |

|   |             |             |             |
|---|-------------|-------------|-------------|
| C | -3.02293700 | 4.30605500  | -3.76141400 |
| H | -2.47993400 | 4.78886100  | -4.58616700 |
| H | -3.99901500 | 4.80021100  | -3.69551900 |
| C | -0.86040800 | 1.00717200  | -5.24833200 |
| C | -0.65946600 | 2.24460500  | -4.34265200 |
| H | -0.63460700 | 3.18787400  | -4.89772600 |
| H | 0.28686600  | 2.15058800  | -3.80020700 |
| C | -3.58615000 | -2.25290700 | -1.28379400 |
| C | -4.92273300 | -1.93279600 | -0.93137600 |
| C | -2.97748900 | -3.42396200 | -0.76516400 |
| C | -5.61351900 | -0.78924300 | -1.44696700 |
| C | -5.65525300 | -2.80420800 | -0.04007200 |
| C | -3.73758900 | -4.30701600 | 0.09191600  |
| C | -6.90499300 | -0.50858600 | -1.08507800 |
| H | -5.10072900 | -0.13706800 | -2.14370900 |
| C | -6.99982600 | -2.47273200 | 0.31733600  |
| C | -5.04933800 | -3.97003600 | 0.43597300  |
| C | -7.60988300 | -1.35520500 | -0.18356200 |
| H | -7.40049500 | 0.36849900  | -1.49269700 |
| H | -7.52946000 | -3.13803400 | 0.99538800  |
| H | -5.61636400 | -4.63593500 | 1.08385900  |
| H | -8.63251100 | -1.11485800 | 0.09448800  |
| C | 0.17806600  | 4.11232800  | 1.07327400  |
| C | 1.58551000  | 4.08633400  | 0.90086700  |
| C | -0.37512800 | 4.31429000  | 2.36066400  |
| C | 2.20761900  | 3.85802600  | -0.36896300 |
| C | 2.44896200  | 4.31764700  | 2.03777600  |
| C | 0.50050500  | 4.52869400  | 3.49216900  |
| C | 3.57163400  | 3.85698600  | -0.50786600 |
| H | 1.58304300  | 3.67370400  | -1.23452700 |
| C | 3.86672300  | 4.32941100  | 1.84632300  |
| C | 1.88482800  | 4.53520800  | 3.29825800  |
| C | 4.41623700  | 4.10617300  | 0.61195700  |
| H | 4.01038700  | 3.65787800  | -1.48114300 |
| H | 4.50010000  | 4.51645900  | 2.71034500  |
| H | 2.53938000  | 4.71692500  | 4.14837300  |
| H | 5.49496600  | 4.11564700  | 0.48103000  |
| C | -1.06747800 | -4.93928400 | -0.55414900 |
| H | -0.03018400 | -5.17891300 | -0.76933600 |
| C | -1.61746700 | -3.78227100 | -1.04273000 |
| H | -1.01210200 | -3.10789500 | -1.63609000 |
| C | -1.83596700 | -5.82558600 | 0.25453100  |
| H | -1.38546200 | -6.74337100 | 0.62243200  |
| C | -3.12986100 | -5.51022600 | 0.57280400  |

|   |             |             |            |
|---|-------------|-------------|------------|
| H | -3.72521600 | -6.17143200 | 1.19871100 |
| C | -2.29577000 | 4.51794100  | 3.85722600 |
| H | -3.37095100 | 4.50189900  | 4.01344800 |
| C | -1.42962600 | 4.74494100  | 4.96573000 |
| H | -1.85187800 | 4.91277600  | 5.95293100 |
| C | -0.07261100 | 4.74440700  | 4.78590400 |
| H | 0.59919500  | 4.91118100  | 5.62474500 |
| C | -1.78816000 | 4.31014600  | 2.60117900 |
| H | -2.45607200 | 4.11127500  | 1.77186600 |
| O | -1.98193900 | 1.19336800  | 1.42456000 |

TS-1-1R

l imaginary frequencies

H = -4333.068995

G = -4333.244472

E(M06-2X-DCM) = -4333.860704

|   |             |             |             |
|---|-------------|-------------|-------------|
| O | -0.56600000 | 1.82170400  | -1.16597200 |
| O | -2.81783900 | 0.98268300  | -0.18352400 |
| P | -1.19561000 | 0.78894200  | -0.07437000 |
| O | -0.87827900 | 1.29268100  | 1.35944000  |
| C | 0.76960200  | 0.95905600  | 4.91273100  |
| C | -0.06726400 | -0.35842400 | 5.08905300  |
| H | -0.89204600 | -0.11578100 | 5.77164100  |
| H | 0.58310800  | -1.06118300 | 5.60964400  |
| C | -0.16609400 | -2.31828100 | 3.41938400  |
| C | 0.54528100  | -3.18106300 | 4.28422800  |
| C | -0.41148200 | -2.76317300 | 2.09918600  |
| C | 0.97713000  | -4.43119900 | 3.85416700  |
| H | 0.73442500  | -2.90219800 | 5.31360400  |
| C | 0.05021100  | -3.99951000 | 1.66573400  |
| H | -0.91324800 | -2.11732000 | 1.38755300  |
| C | 0.73976400  | -4.84163800 | 2.54229400  |
| H | 1.51034400  | -5.07946100 | 4.54317900  |
| H | -0.13019600 | -4.30335700 | 0.64043900  |
| H | 1.09566400  | -5.80986400 | 2.20128400  |
| C | -0.66876100 | -1.01555000 | 3.86852100  |
| C | 1.99013000  | 0.74065900  | 3.98799700  |
| H | 2.54479500  | 1.68736500  | 3.91952600  |
| H | 2.66647000  | 0.01057000  | 4.43690300  |
| N | 1.68790500  | 0.24832300  | 2.64813900  |
| C | 2.54260400  | -0.56390600 | 1.94547800  |
| N | 2.09464000  | -0.81675600 | 0.66876100  |
| C | 2.72786800  | -1.48848300 | -0.39452200 |
| C | 4.11492500  | -1.50602900 | -0.59366700 |

|   |              |              |              |
|---|--------------|--------------|--------------|
| C | 1. 89519400  | -2. 09682100 | -1. 34761200 |
| C | 4. 64444000  | -2. 13108000 | -1. 72244800 |
| C | 2. 44552700  | -2. 72429600 | -2. 46330600 |
| H | 0. 81931700  | -2. 04301700 | -1. 22594900 |
| C | 3. 82539800  | -2. 75364100 | -2. 66370000 |
| H | 4. 25035400  | -3. 23842200 | -3. 53370400 |
| C | 1. 53174200  | -3. 42994500 | -3. 42727000 |
| C | 6. 12485900  | -2. 03357000 | -1. 97107200 |
| F | 0. 35263600  | -2. 78413800 | -3. 58127500 |
| F | 2. 08397600  | -3. 56070600 | -4. 65302800 |
| F | 1. 22566300  | -4. 68533400 | -3. 00276400 |
| F | 6. 57015100  | -3. 00730500 | -2. 79500300 |
| F | 6. 45199900  | -0. 84894000 | -2. 56017200 |
| F | 6. 84160500  | -2. 10345500 | -0. 83118100 |
| S | 3. 94502500  | -1. 21922100 | 2. 61404600  |
| H | 4. 77048800  | -1. 03255800 | 0. 12211100  |
| C | -1. 74044800 | -0. 38226900 | 3. 21586600  |
| H | 1. 11101700  | -0. 61928300 | 0. 46904900  |
| H | -2. 26746000 | 0. 37921100  | 3. 79017700  |
| H | -2. 39820600 | -1. 00107900 | 2. 60692400  |
| H | 1. 02139400  | 0. 79353500  | 2. 10243200  |
| H | -1. 23908400 | 0. 42135700  | 2. 27312400  |
| C | -4. 53134600 | -0. 16063800 | -3. 83551500 |
| C | -3. 98029400 | 1. 10556100  | -3. 67546400 |
| C | -3. 47879600 | 1. 51789300  | -2. 43073200 |
| C | -4. 01877200 | -0. 67208600 | -1. 49743800 |
| C | -4. 57308100 | -1. 02203300 | -2. 74118400 |
| C | -0. 81454600 | 3. 19353500  | -1. 16405200 |
| C | -2. 02817900 | 3. 67257700  | -1. 65711500 |
| C | -2. 33021100 | 5. 03701800  | -1. 52149700 |
| C | -1. 37623800 | 5. 93056400  | -1. 04755200 |
| C | -0. 11490500 | 5. 45006900  | -0. 69995800 |
| C | 0. 19291500  | 4. 07767900  | -0. 72184100 |
| H | -5. 02285600 | -2. 00483500 | -2. 84453000 |
| H | 0. 65615400  | 6. 14489100  | -0. 38192600 |
| C | -3. 12048800 | 2. 99903300  | -2. 48490200 |
| C | -2. 81029100 | 3. 14946100  | -4. 01475000 |
| H | -1. 78288900 | 2. 81482900  | -4. 19872300 |
| H | -2. 88943200 | 4. 18555100  | -4. 35727000 |
| H | -3. 76649900 | 5. 86139700  | -2. 92443500 |
| H | -4. 29751100 | 5. 93598300  | -1. 24876200 |
| C | -3. 44168400 | 0. 60672200  | -1. 37683200 |
| H | -4. 92685200 | -0. 47863100 | -4. 79676700 |
| H | -1. 59767400 | 6. 99191200  | -0. 96758300 |

|   |             |             |             |
|---|-------------|-------------|-------------|
| C | -3.80026000 | 2.19296100  | -4.71075800 |
| H | -3.41828000 | 1.80657200  | -5.66244300 |
| H | -4.75294500 | 2.69386100  | -4.93351600 |
| C | -3.74843700 | 5.31863700  | -1.96918500 |
| C | -4.34395900 | 3.90099300  | -2.11338600 |
| H | -4.74869400 | 3.56685500  | -1.15105400 |
| H | -5.14814600 | 3.84024400  | -2.85311300 |
| C | 1.56268000  | 3.62630600  | -0.32545700 |
| C | 2.07553800  | 3.95915500  | 0.95682900  |
| C | 2.38894500  | 2.95122000  | -1.26290900 |
| C | 1.31512800  | 4.65820800  | 1.95136600  |
| C | 3.43306200  | 3.59572600  | 1.30093500  |
| C | 3.72322100  | 2.54595300  | -0.88049400 |
| C | 1.87057500  | 5.03386400  | 3.14804600  |
| H | 0.27787700  | 4.89526500  | 1.74781100  |
| C | 3.96762800  | 3.98659800  | 2.56930200  |
| C | 4.20820500  | 2.87932700  | 0.38626000  |
| C | 3.21915000  | 4.70336800  | 3.46402000  |
| H | 1.27083300  | 5.58255800  | 3.86988700  |
| H | 4.99319000  | 3.70842500  | 2.79960000  |
| H | 5.21914800  | 2.58702800  | 0.66154000  |
| H | 3.64377100  | 5.01225100  | 4.41549000  |
| C | -4.11177200 | -1.66138700 | -0.37928300 |
| C | -3.48556000 | -2.92670700 | -0.51224000 |
| C | -4.93656400 | -1.39114800 | 0.74236600  |
| C | -2.58072900 | -3.23811400 | -1.58004400 |
| C | -3.74571200 | -3.95949800 | 0.46572200  |
| C | -5.13695000 | -2.41503300 | 1.74443100  |
| C | -2.03778800 | -4.49052700 | -1.71309300 |
| H | -2.30275000 | -2.45724100 | -2.27728000 |
| C | -3.17409500 | -5.25775500 | 0.28067700  |
| C | -4.55216200 | -3.67281200 | 1.57022500  |
| C | -2.35744100 | -5.52372700 | -0.78505400 |
| H | -1.33899900 | -4.69056900 | -2.51877500 |
| H | -3.40285600 | -6.02885500 | 1.01262800  |
| H | -4.73670500 | -4.45036900 | 2.30888900  |
| H | -1.93218800 | -6.51517000 | -0.91729200 |
| C | 2.79762700  | 1.99816700  | -3.47811000 |
| H | 2.45608000  | 1.80016700  | -4.49060400 |
| C | 1.98149500  | 2.67152700  | -2.60702100 |
| H | 1.00843100  | 3.00901200  | -2.94273400 |
| C | 4.08664600  | 1.55047800  | -3.07443100 |
| H | 4.71027100  | 0.98879700  | -3.76322000 |
| C | 4.53604500  | 1.82793300  | -1.81268500 |

|   |             |             |             |
|---|-------------|-------------|-------------|
| H | 5.52221500  | 1.49997700  | -1.49596700 |
| C | -6.40588600 | 0.08396100  | 2.02581800  |
| H | -6.91068700 | 1.03986100  | 2.13742000  |
| C | -6.57468100 | -0.91785300 | 3.02362700  |
| H | -7.20007600 | -0.71678800 | 3.88927100  |
| C | -5.96037700 | -2.13211900 | 2.87974800  |
| H | -6.09277900 | -2.91326200 | 3.62483500  |
| C | -5.62103600 | -0.14614300 | 0.92621100  |
| H | -5.51537000 | 0.62602200  | 0.17345800  |
| C | 1.34027700  | 1.29033200  | 6.31089700  |
| H | 0.53323000  | 1.48676500  | 7.02625900  |
| H | 1.95339100  | 0.47117600  | 6.70445700  |
| H | 1.96837700  | 2.18686800  | 6.26419200  |
| C | -0.09662900 | 2.15424700  | 4.47312500  |
| H | -0.95431500 | 2.27540100  | 5.14704900  |
| H | 0.49712100  | 3.07198500  | 4.52274800  |
| H | -0.47382900 | 2.07896500  | 3.45291800  |
| O | -0.71895500 | -0.58307000 | -0.41782700 |

INT-10

0 imaginary frequencies

H = -4333.075321

G = -4333.249265

E(M06-2X-DCM) = -4333.871089

|   |             |             |             |
|---|-------------|-------------|-------------|
| C | -0.96701500 | -4.41294700 | 1.99471600  |
| C | 0.34126700  | -4.19703900 | 2.85131200  |
| H | 0.04815800  | -4.32809100 | 3.90287300  |
| H | 1.01583300  | -5.01474500 | 2.59586100  |
| C | 2.37505700  | -2.71717200 | 2.30121600  |
| C | 3.21222000  | -3.82652100 | 1.99298100  |
| C | 2.92484400  | -1.41108100 | 2.13502100  |
| C | 4.53377300  | -3.63739200 | 1.60286500  |
| H | 2.84619900  | -4.83835500 | 2.10202000  |
| C | 4.22244400  | -1.23396200 | 1.69190500  |
| H | 2.31299600  | -0.53798300 | 2.32641700  |
| C | 5.03714100  | -2.34832400 | 1.43631400  |
| H | 5.15719800  | -4.50018400 | 1.39140000  |
| H | 4.60469200  | -0.22982600 | 1.54065800  |
| H | 6.05312000  | -2.20288500 | 1.08111600  |
| C | 1.02646100  | -2.86959100 | 2.76803700  |
| C | -0.58808700 | -4.33338000 | 0.50086100  |
| H | -1.49831700 | -4.45395500 | -0.10060200 |
| H | 0.09525100  | -5.14291500 | 0.23731200  |
| N | 0.05826500  | -3.08177100 | 0.14617200  |

|   |              |              |              |
|---|--------------|--------------|--------------|
| C | 1. 15559800  | -2. 99436200 | -0. 68195300 |
| N | 1. 35037000  | -1. 70950800 | -1. 10131300 |
| C | 2. 40028100  | -1. 07313000 | -1. 77203200 |
| C | 3. 67779200  | -1. 60811000 | -1. 98433400 |
| C | 2. 13372700  | 0. 24411800  | -2. 19562400 |
| C | 4. 66094700  | -0. 82535200 | -2. 59431800 |
| C | 3. 12212600  | 0. 99717100  | -2. 81741400 |
| H | 1. 15573500  | 0. 67712800  | -2. 00902300 |
| C | 4. 40192300  | 0. 47366600  | -3. 02246000 |
| H | 5. 17496900  | 1. 06703000  | -3. 49437500 |
| C | 2. 79346800  | 2. 37766000  | -3. 32017100 |
| C | 6. 05110100  | -1. 39326400 | -2. 69702200 |
| F | 2. 33670800  | 2. 35665600  | -4. 59184000 |
| F | 3. 87982600  | 3. 18846600  | -3. 30957000 |
| F | 1. 83976700  | 2. 97995000  | -2. 57080400 |
| F | 6. 82108600  | -0. 71496700 | -3. 57307400 |
| F | 6. 04492700  | -2. 68841800 | -3. 07451600 |
| F | 6. 69004800  | -1. 34575400 | -1. 49503700 |
| S | 2. 11666700  | -4. 33232800 | -1. 06531200 |
| C | -1. 45440200 | -5. 84760600 | 2. 28137800  |
| H | -1. 76658800 | -5. 95651200 | 3. 32623500  |
| H | -2. 31835300 | -6. 08569100 | 1. 65119600  |
| H | -0. 67493700 | -6. 59134500 | 2. 07734200  |
| C | -2. 10638300 | -3. 43395100 | 2. 33572700  |
| H | -2. 99845100 | -3. 70662300 | 1. 76060200  |
| H | -2. 37147900 | -3. 49430400 | 3. 39824500  |
| H | -1. 88476100 | -2. 38874600 | 2. 10698200  |
| H | 3. 89641900  | -2. 62075900 | -1. 67757200 |
| C | 0. 33347200  | -1. 71814000 | 3. 40750300  |
| H | 0. 55426000  | -1. 07947500 | -0. 89119300 |
| H | -0. 47205400 | -2. 05753800 | 4. 05960000  |
| H | 1. 02535800  | -1. 10545800 | 3. 99223800  |
| H | -0. 54919400 | -2. 24773800 | 0. 12443400  |
| H | -0. 14779100 | -1. 02671200 | 2. 68422700  |
| O | -0. 51000700 | 1. 83954400  | 0. 12725600  |
| O | -2. 98042100 | 1. 03651400  | 0. 07343900  |
| P | -1. 46785600 | 0. 52996500  | 0. 51745600  |
| O | -1. 00122200 | -0. 54435800 | -0. 44657100 |
| C | -1. 53578500 | 5. 53093300  | 1. 83839600  |
| C | -2. 13804800 | 5. 09809000  | 0. 66248000  |
| C | -1. 75214700 | 3. 89305000  | 0. 05646000  |
| C | -0. 15377200 | 3. 51181300  | 1. 85379000  |
| C | -0. 53470900 | 4. 74707100  | 2. 40646700  |
| C | -3. 21952600 | 1. 20437400  | -1. 28394900 |

|   |             |             |             |
|---|-------------|-------------|-------------|
| C | -2.85619100 | 2.40282100  | -1.89654200 |
| C | -2.92378200 | 2.51896200  | -3.29259100 |
| C | -3.46726400 | 1.49470600  | -4.06112900 |
| C | -3.94010900 | 0.34912800  | -3.42065600 |
| C | -3.81162800 | 0.16713100  | -2.03266500 |
| H | -0.03462400 | 5.08136300  | 3.31100800  |
| H | -4.39829100 | -0.44414200 | -4.00432400 |
| C | -2.45581300 | 3.74119100  | -1.28900300 |
| C | -3.72830400 | 4.62250800  | -1.04002700 |
| H | -4.18271100 | 4.97221100  | -1.97224500 |
| H | -4.47411600 | 4.01765500  | -0.51138500 |
| H | -1.64997600 | 3.72402700  | -4.59109400 |
| H | -3.12070400 | 4.53718900  | -4.06731600 |
| C | -0.80608300 | 3.07574100  | 0.68255500  |
| H | -1.83409900 | 6.46498600  | 2.30787400  |
| H | -3.53295600 | 1.58235700  | -5.14280300 |
| C | -3.24545500 | 5.76359500  | -0.12314300 |
| H | -2.86200200 | 6.61225500  | -0.70744300 |
| H | -4.04069300 | 6.15811000  | 0.51987400  |
| C | -2.33545200 | 3.83951100  | -3.74357200 |
| C | -1.62172400 | 4.34367500  | -2.46790200 |
| H | -1.54918100 | 5.43485400  | -2.41401900 |
| H | -0.60502600 | 3.93752700  | -2.43010300 |
| C | -4.33207800 | -1.09229800 | -1.41557600 |
| C | -5.44642800 | -1.04556200 | -0.53923900 |
| C | -3.78136900 | -2.34329200 | -1.79121200 |
| C | -6.07418100 | 0.17966200  | -0.14546900 |
| C | -6.01209600 | -2.27572800 | -0.03246700 |
| C | -4.38567200 | -3.56699500 | -1.31243600 |
| C | -7.14967000 | 0.19269900  | 0.70331100  |
| H | -5.68655100 | 1.11379600  | -0.53367100 |
| C | -7.13214900 | -2.21861600 | 0.85508300  |
| C | -5.47554900 | -3.50046500 | -0.44016500 |
| C | -7.68525700 | -1.02126800 | 1.21912700  |
| H | -7.60223600 | 1.13933600  | 0.98608100  |
| H | -7.53867200 | -3.15520900 | 1.23008100  |
| H | -5.92721300 | -4.42371100 | -0.08149700 |
| H | -8.53700500 | -0.99128100 | 1.89342900  |
| C | 0.96741000  | 2.78593600  | 2.53526000  |
| C | 2.27136700  | 2.83413500  | 1.98162000  |
| C | 0.76381300  | 2.21870900  | 3.81693300  |
| C | 2.54270100  | 3.37808700  | 0.68478000  |
| C | 3.39477400  | 2.34766700  | 2.75241700  |
| C | 1.89501100  | 1.73329300  | 4.57647600  |



|   |             |             |             |
|---|-------------|-------------|-------------|
| C | 3.81781600  | 3.43603900  | 0.18497300  |
| H | 1.71594600  | 3.74091000  | 0.08616000  |
| C | 4.71229100  | 2.44047300  | 2.20022300  |
| C | 3.17855400  | 1.81857600  | 4.02852700  |
| C | 4.92110400  | 2.96630000  | 0.95308400  |
| H | 3.99016700  | 3.83581700  | -0.80915200 |
| H | 5.54801700  | 2.09073200  | 2.80295900  |
| H | 4.03014000  | 1.47353600  | 4.61223600  |
| H | 5.92678600  | 3.03285000  | 0.54652100  |
| C | -2.14549200 | -3.68406200 | -3.02152600 |
| H | -1.26616000 | -3.74299100 | -3.65689100 |
| C | -2.62746800 | -2.46035900 | -2.63396900 |
| H | -2.12155700 | -1.55541600 | -2.94650200 |
| C | -2.77761700 | -4.88558500 | -2.58831100 |
| H | -2.38965600 | -5.84614700 | -2.91686500 |
| C | -3.85795100 | -4.82431700 | -1.74862000 |
| H | -4.34272900 | -5.73380000 | -1.39984900 |
| C | -0.70323200 | 1.56780600  | 5.65840500  |
| H | -1.70165700 | 1.47979500  | 6.07775900  |
| C | 0.41667200  | 1.11324500  | 6.41260000  |
| H | 0.26464900  | 0.70250700  | 7.40753300  |
| C | 1.67695300  | 1.18868600  | 5.88237500  |
| H | 2.54005500  | 0.84255600  | 6.44694600  |
| C | -0.53649700 | 2.10001300  | 4.40665700  |
| H | -1.39797600 | 2.40751500  | 3.82794500  |
| O | -1.49399100 | 0.28199900  | 1.99180500  |

TS-1-1S'

l imaginary frequencies

H = -4333.074824

G = -4333.249823

E(M06-2X-DCM) = -4333.870171

|   |             |            |            |
|---|-------------|------------|------------|
| C | 0.66383100  | 4.41783000 | 2.18800800 |
| C | -0.60615800 | 4.07776300 | 3.03909700 |
| H | -0.32116200 | 4.07673600 | 4.10069500 |
| H | -1.31416300 | 4.89471700 | 2.89398300 |
| C | -2.65409900 | 2.60291000 | 2.46179400 |
| C | -3.53561100 | 3.70857100 | 2.38125200 |
| C | -3.19852000 | 1.31035600 | 2.24499700 |
| C | -4.89647700 | 3.52416800 | 2.15856100 |
| H | -3.16935200 | 4.71715600 | 2.52206900 |
| C | -4.54919300 | 1.13556300 | 1.98301000 |
| H | -2.55587000 | 0.43846200 | 2.27309900 |
| C | -5.40619600 | 2.24198400 | 1.95464400 |

|   |             |             |             |
|---|-------------|-------------|-------------|
| H | -5.55489600 | 4.38663200  | 2.12283000  |
| H | -4.93135700 | 0.13543200  | 1.80465300  |
| H | -6.46677400 | 2.10285100  | 1.76415400  |
| C | -1.23678700 | 2.74400500  | 2.75406600  |
| C | 0.22157900  | 4.25273000  | 0.72437500  |
| H | 1.08290500  | 4.32712900  | 0.05056600  |
| H | -0.49570800 | 5.02717900  | 0.44728100  |
| N | -0.43112700 | 2.95588500  | 0.53590200  |
| C | -1.47605400 | 2.80001900  | -0.39860700 |
| N | -1.54919600 | 1.50935000  | -0.81579800 |
| C | -2.44999900 | 0.82945800  | -1.65055700 |
| C | -3.68146800 | 1.32417700  | -2.09981500 |
| C | -2.05670400 | -0.47322800 | -2.01681700 |
| C | -4.49295800 | 0.52011300  | -2.90460500 |
| C | -2.87926900 | -1.25143500 | -2.82144200 |
| H | -1.11455800 | -0.87256500 | -1.65357200 |
| C | -4.10773300 | -0.76418700 | -3.27644400 |
| H | -4.74815200 | -1.37461700 | -3.90152200 |
| C | -2.42996100 | -2.62142400 | -3.25482900 |
| C | -5.84658100 | 1.04183600  | -3.31246300 |
| F | -1.87033400 | -2.60455400 | -4.48459900 |
| F | -3.46844600 | -3.49064200 | -3.31097500 |
| F | -1.51360700 | -3.14998000 | -2.41105900 |
| F | -6.31215300 | 0.42725800  | -4.42172700 |
| F | -5.82298300 | 2.36809700  | -3.56015800 |
| F | -6.76648800 | 0.84248400  | -2.33676400 |
| S | -2.48208500 | 4.07308300  | -0.82407600 |
| C | 1.03677900  | 5.89007000  | 2.44005200  |
| H | 1.35553000  | 6.04208000  | 3.47763700  |
| H | 1.86855900  | 6.18817400  | 1.79215300  |
| H | 0.19506600  | 6.56330900  | 2.23869800  |
| C | 1.89258500  | 3.54073600  | 2.50489200  |
| H | 2.75049300  | 3.89935500  | 1.92507600  |
| H | 2.15984800  | 3.61190700  | 3.56621600  |
| H | 1.76669600  | 2.48218200  | 2.26403100  |
| H | -3.99404800 | 2.32369900  | -1.83582900 |
| C | -0.50181000 | 1.54576300  | 3.28924500  |
| H | -0.70904400 | 0.94539400  | -0.57583600 |
| H | 0.36237100  | 1.84716600  | 3.87975700  |
| H | -1.16127200 | 0.95228100  | 3.92973800  |
| H | 0.24184800  | 2.16774500  | 0.48479000  |
| H | -0.10640600 | 0.86128800  | 2.52930300  |
| O | 0.67061800  | -1.83087200 | 0.19092500  |
| O | 3.05422200  | -0.81932700 | 0.00740400  |

|   |             |              |              |
|---|-------------|--------------|--------------|
| P | 1. 55787100 | -0. 48359800 | 0. 62842700  |
| O | 0. 90809900 | 0. 62141700  | -0. 19144200 |
| C | 2. 04451400 | -5. 45844800 | 1. 78061400  |
| C | 2. 57184100 | -4. 95505600 | 0. 59649100  |
| C | 2. 05913200 | -3. 78168700 | 0. 02340900  |
| C | 0. 49718300 | -3. 56569100 | 1. 88113900  |
| C | 0. 99600900 | -4. 77543100 | 2. 39398500  |
| C | 3. 18893000 | -0. 94889800 | -1. 36620600 |
| C | 2. 91831900 | -2. 17937900 | -1. 96550200 |
| C | 2. 91204000 | -2. 28264900 | -3. 36439000 |
| C | 3. 28145200 | -1. 20037700 | -4. 15663100 |
| C | 3. 65590500 | -0. 00793600 | -3. 53793600 |
| C | 3. 60373400 | 0. 15255600  | -2. 14236900 |
| H | 0. 55678600 | -5. 16745700 | 3. 30691200  |
| H | 3. 97805400 | 0. 83512700  | -4. 14240300 |
| C | 2. 69501400 | -3. 55401600 | -1. 34510000 |
| C | 4. 05686900 | -4. 30249400 | -1. 14613800 |
| H | 4. 51434400 | -4. 59669000 | -2. 09608800 |
| H | 4. 75432300 | -3. 63108400 | -0. 63205900 |
| H | 1. 71940600 | -3. 62581700 | -4. 60247500 |
| H | 3. 30302000 | -4. 26043200 | -4. 16512600 |
| C | 1. 07219900 | -3. 05883700 | 0. 69788600  |
| H | 2. 43847700 | -6. 36937700 | 2. 22440800  |
| H | 3. 28769500 | -1. 27898400 | -5. 24096400 |
| C | 3. 71731500 | -5. 49683100 | -0. 23006700 |
| H | 3. 40625900 | -6. 37422700 | -0. 81480000 |
| H | 4. 56675000 | -5. 81448200 | 0. 38561400  |
| C | 2. 45915000 | -3. 66150200 | -3. 79427800 |
| C | 1. 87916400 | -4. 24715400 | -2. 48744400 |
| H | 1. 93714900 | -5. 33928000 | -2. 43804800 |
| H | 0. 82625300 | -3. 96315900 | -2. 39566900 |
| C | 4. 02166500 | 1. 46091900  | -1. 54906000 |
| C | 5. 19705700 | 1. 53986100  | -0. 75939700 |
| C | 3. 30512000 | 2. 64156200  | -1. 86800600 |
| C | 5. 98873600 | 0. 39351800  | -0. 42841600 |
| C | 5. 65515800 | 2. 82539700  | -0. 28199700 |
| C | 3. 80052300 | 3. 92527100  | -1. 42269300 |
| C | 7. 12002700 | 0. 50162700  | 0. 33681300  |
| H | 5. 68175700 | -0. 57784100 | -0. 79672600 |
| C | 6. 83859900 | 2. 89457700  | 0. 51819300  |
| C | 4. 95325400 | 3. 98174700  | -0. 63450900 |
| C | 7. 55096600 | 1. 76752600  | 0. 82521700  |
| H | 7. 69782300 | -0. 38761200 | 0. 57395600  |
| H | 7. 16272900 | 3. 87044700  | 0. 87273200  |

|   |             |             |             |
|---|-------------|-------------|-------------|
| H | 5.32290300  | 4.94974600  | -0.30077600 |
| H | 8.44923600  | 1.83338500  | 1.43333400  |
| C | -0.64359400 | -2.92227000 | 2.61040600  |
| C | -1.95367000 | -2.99555900 | 2.07339900  |
| C | -0.43901400 | -2.38153200 | 3.90374200  |
| C | -2.22958700 | -3.52555900 | 0.77186400  |
| C | -3.07883500 | -2.54850900 | 2.86521000  |
| C | -1.57342600 | -1.94689200 | 4.68880900  |
| C | -3.50853500 | -3.59984600 | 0.28363900  |
| H | -1.40321700 | -3.86840400 | 0.16145100  |
| C | -4.39988600 | -2.65626500 | 2.32437400  |
| C | -2.86028200 | -2.04504800 | 4.15120100  |
| C | -4.61236300 | -3.16299000 | 1.06997200  |
| H | -3.68344900 | -3.99093400 | -0.71392300 |
| H | -5.23583300 | -2.33739100 | 2.94379300  |
| H | -3.71282100 | -1.73236200 | 4.75159700  |
| H | -5.62092600 | -3.24254100 | 0.67289700  |
| C | 1.43896100  | 3.78951900  | -2.95846600 |
| H | 0.51374100  | 3.74926200  | -3.52649900 |
| C | 2.08501800  | 2.62812500  | -2.62059900 |
| H | 1.66526200  | 1.67192700  | -2.90762300 |
| C | 1.96157300  | 5.05448000  | -2.56143300 |
| H | 1.44295700  | 5.96500500  | -2.84952000 |
| C | 3.10210600  | 5.11504500  | -1.80565300 |
| H | 3.50523900  | 6.07323900  | -1.48444300 |
| C | 1.03125500  | -1.73308000 | 5.74342500  |
| H | 2.03218000  | -1.62287500 | 6.15144500  |
| C | -0.09167500 | -1.33528300 | 6.52429300  |
| H | 0.06093600  | -0.94738000 | 7.52827000  |
| C | -1.35533200 | -1.43299300 | 6.00688000  |
| H | -2.22112200 | -1.12664600 | 6.59005000  |
| C | 0.86477300  | -2.23511800 | 4.47943900  |
| H | 1.72796200  | -2.49455100 | 3.88048000  |
| O | 1.69954600  | -0.35638700 | 2.10570300  |

INT-11

0 imaginary frequencies

H = -4333.089913

G = -4333.261962

E(M06-2X-DCM) = -4333.901223

|   |             |            |            |
|---|-------------|------------|------------|
| C | 0.51655400  | 4.60478700 | 1.22029200 |
| C | -0.63542100 | 4.19591500 | 2.18420700 |
| H | -0.23117100 | 3.85701800 | 3.14201200 |
| H | -1.27673600 | 5.05174400 | 2.40032100 |

|   |             |             |             |
|---|-------------|-------------|-------------|
| C | -2.94577300 | 3.40044000  | 1.32941000  |
| C | -3.35000900 | 4.70881800  | 1.01610700  |
| C | -3.94374500 | 2.41877200  | 1.43669800  |
| C | -4.69267400 | 5.02614700  | 0.82123900  |
| H | -2.61575400 | 5.50002500  | 0.90769700  |
| C | -5.28992500 | 2.73417300  | 1.24308300  |
| H | -3.68648700 | 1.39564900  | 1.68356600  |
| C | -5.67148400 | 4.03876500  | 0.93546100  |
| H | -4.97137700 | 6.04741900  | 0.57710900  |
| H | -6.03888000 | 1.95276300  | 1.33832000  |
| H | -6.71922800 | 4.28481000  | 0.78695000  |
| C | -1.47155700 | 3.04440800  | 1.54716800  |
| C | -0.01374600 | 4.15417800  | -0.14998300 |
| H | 0.75944400  | 3.97508500  | -0.89937000 |
| H | -0.74931900 | 4.84871100  | -0.55927600 |
| N | -0.72412300 | 2.86201600  | 0.12047000  |
| C | -1.56654600 | 2.32902800  | -1.00931400 |
| N | -1.49646800 | 0.98454600  | -0.99397800 |
| C | -2.18671000 | 0.06141200  | -1.80916100 |
| C | -3.53161600 | 0.21841700  | -2.16342000 |
| C | -1.49007700 | -1.09186000 | -2.18688800 |
| C | -4.16079900 | -0.77767500 | -2.90672500 |
| C | -2.13561900 | -2.07149100 | -2.94012500 |
| H | -0.45617400 | -1.22160100 | -1.88294600 |
| C | -3.47007800 | -1.92141000 | -3.31165700 |
| H | -3.96559500 | -2.68147800 | -3.90365400 |
| C | -1.39546100 | -3.33682900 | -3.28103800 |
| C | -5.63415200 | -0.66823100 | -3.20170900 |
| F | -0.10000900 | -3.09664000 | -3.58048200 |
| F | -1.94558300 | -3.98362400 | -4.32787600 |
| F | -1.39782500 | -4.20507000 | -2.23455100 |
| F | -5.94916400 | -1.22580900 | -4.39033000 |
| F | -6.05605300 | 0.61169900  | -3.22243200 |
| F | -6.36935600 | -1.31254900 | -2.26050400 |
| S | -2.37377200 | 3.32274700  | -2.04567600 |
| C | 0.74825000  | 6.12443700  | 1.21806400  |
| H | 1.07686200  | 6.46471800  | 2.20636100  |
| H | 1.52721900  | 6.39899500  | 0.49732700  |
| H | -0.16377800 | 6.67503400  | 0.95663100  |
| C | 1.83173600  | 3.88975300  | 1.59260000  |
| H | 2.61424900  | 4.10597600  | 0.85730900  |
| H | 2.17998600  | 4.24423800  | 2.56969500  |
| H | 1.73304300  | 2.80257800  | 1.66324400  |
| H | -4.08095600 | 1.09636700  | -1.85259200 |

|   |             |             |             |
|---|-------------|-------------|-------------|
| C | -1.27818300 | 1.74173200  | 2.32406300  |
| H | -0.64762600 | 0.59821800  | -0.52192000 |
| H | -1.79089800 | 1.83053300  | 3.28597600  |
| H | -1.69091500 | 0.87050100  | 1.81095700  |
| H | 0.02772400  | 2.13284000  | 0.27530400  |
| H | -0.22366600 | 1.53853900  | 2.52486000  |
| O | 0.67427400  | -1.60130300 | 0.72877300  |
| O | 3.08018000  | -0.65828600 | 0.49605200  |
| P | 1.57089100  | -0.21887800 | 1.00296600  |
| O | 0.95735900  | 0.74246600  | -0.01920200 |
| C | 1.76277600  | -4.80553800 | 3.19540600  |
| C | 2.44533200  | -4.56016300 | 2.00858900  |
| C | 2.01763500  | -3.55092700 | 1.13323600  |
| C | 0.23185700  | -2.96621000 | 2.68476700  |
| C | 0.64345600  | -4.03229300 | 3.50259700  |
| C | 3.28070700  | -1.10772000 | -0.79894400 |
| C | 3.06232500  | -2.45445700 | -1.09617100 |
| C | 3.16170700  | -2.89408600 | -2.42500600 |
| C | 3.57030200  | -2.02563300 | -3.43222100 |
| C | 3.87921400  | -0.70687300 | -3.10213100 |
| C | 3.73053600  | -0.21502300 | -1.79363200 |
| H | 0.07989800  | -4.23395700 | 4.40901400  |
| H | 4.22982000  | -0.02569200 | -3.87222700 |
| C | 2.79524800  | -3.64093000 | -0.17551700 |
| C | 4.12639300  | -4.28472700 | 0.33799200  |
| H | 4.68492400  | -4.78297800 | -0.46095300 |
| H | 4.76327800  | -3.49412700 | 0.75113700  |
| H | 2.10223300  | -4.53995000 | -3.38253400 |
| H | 3.65619400  | -4.98826400 | -2.68051800 |
| C | 0.97125700  | -2.71016100 | 1.51275100  |
| H | 2.08744300  | -5.59056600 | 3.87384800  |
| H | 3.65715200  | -2.36681400 | -4.46075900 |
| C | 3.68453700  | -5.24141000 | 1.46805800  |
| H | 3.45262900  | -6.24242800 | 1.07776200  |
| H | 4.45666700  | -5.37486400 | 2.23454800  |
| C | 2.77187900  | -4.35143400 | -2.53683400 |
| C | 2.09407800  | -4.62135500 | -1.17676700 |
| H | 2.16584900  | -5.66506000 | -0.85502700 |
| H | 1.03134600  | -4.36714100 | -1.24274000 |
| C | 4.09218900  | 1.20981900  | -1.51435700 |
| C | 5.22060400  | 1.51171200  | -0.71067900 |
| C | 3.37238100  | 2.25653600  | -2.14264500 |
| C | 6.01387800  | 0.50243800  | -0.07631600 |
| C | 5.62762600  | 2.88772500  | -0.53416600 |

|   |             |             |             |
|---|-------------|-------------|-------------|
| C | 3.81241600  | 3.62537100  | -1.98732400 |
| C | 7.10043500  | 0.82554900  | 0.69305200  |
| H | 5.74448100  | -0.53778900 | -0.21347800 |
| C | 6.76539800  | 3.18285700  | 0.28056500  |
| C | 4.92080700  | 3.90429500  | -1.18293700 |
| C | 7.48130300  | 2.18422300  | 0.88229800  |
| H | 7.68074800  | 0.03730100  | 1.16489000  |
| H | 7.05120500  | 4.22470400  | 0.40613700  |
| H | 5.24957000  | 4.93568400  | -1.06909100 |
| H | 8.34420200  | 2.42112100  | 1.49888400  |
| C | -0.98886200 | -2.19230600 | 3.07404200  |
| C | -2.17626900 | -2.31655200 | 2.30842900  |
| C | -0.99246800 | -1.42687200 | 4.26622000  |
| C | -2.24699400 | -3.08219400 | 1.10022300  |
| C | -3.38923400 | -1.66755100 | 2.75671000  |
| C | -2.22366200 | -0.82525500 | 4.72875100  |
| C | -3.40382700 | -3.16351300 | 0.36950700  |
| H | -1.36196800 | -3.60489900 | 0.75706300  |
| C | -4.57423800 | -1.77265600 | 1.96033100  |
| C | -3.38530600 | -0.96009800 | 3.96311700  |
| C | -4.58363200 | -2.48819500 | 0.79296700  |
| H | -3.41584400 | -3.74647300 | -0.54599300 |
| H | -5.47354400 | -1.26955500 | 2.30980300  |
| H | -4.30861300 | -0.50162800 | 4.31304500  |
| H | -5.48147500 | -2.53944800 | 0.18316400  |
| C | 1.54818000  | 3.05244300  | -3.56816500 |
| H | 0.66224600  | 2.84670600  | -4.16240700 |
| C | 2.20155900  | 2.02519400  | -2.93674400 |
| H | 1.82754800  | 1.01244000  | -3.02463600 |
| C | 2.01195500  | 4.39455800  | -3.44375700 |
| H | 1.48826500  | 5.19492900  | -3.95971300 |
| C | 3.10540900  | 4.66887100  | -2.66629900 |
| H | 3.46485400  | 5.68959700  | -2.55434900 |
| C | 0.15101200  | -0.48229400 | 6.20658800  |
| H | 1.06575900  | -0.31645800 | 6.76897400  |
| C | -1.07310200 | 0.06982200  | 6.68128600  |
| H | -1.08565000 | 0.62992600  | 7.61275300  |
| C | -2.22335700 | -0.09085000 | 5.95680600  |
| H | -3.16172000 | 0.33955800  | 6.29967400  |
| C | 0.19143300  | -1.20168400 | 5.04110400  |
| H | 1.13532200  | -1.57908100 | 4.66877700  |
| O | 1.66483900  | 0.14848600  | 2.43920600  |

INT-11'

0 imaginary frequencies

H = -4333.082008

G = -4333.253910

E(M06-2X-DCM) = -4333.898583

|   |             |             |             |
|---|-------------|-------------|-------------|
| O | 0.51118100  | 2.37420600  | 0.42125000  |
| O | 2.56786000  | 0.93215700  | -0.24861200 |
| P | 0.99696100  | 0.79931100  | 0.29245300  |
| O | 0.29290100  | 0.14802000  | -0.90002300 |
| C | 0.60092100  | 4.90801800  | -2.91718700 |
| C | 1.75632900  | 4.65269400  | -2.18675700 |
| C | 1.70897200  | 3.87092700  | -1.02273500 |
| C | -0.67661300 | 3.50974400  | -1.36291100 |
| C | -0.60528500 | 4.36791100  | -2.47540600 |
| C | 3.50182000  | 1.51737600  | 0.59745800  |
| C | 3.61129600  | 2.90892000  | 0.63832500  |
| C | 4.43279400  | 3.51228700  | 1.60302700  |
| C | 5.22602200  | 2.74125600  | 2.44496500  |
| C | 5.19638000  | 1.35493700  | 2.31034000  |
| C | 4.33555300  | 0.71415200  | 1.40225900  |
| H | -1.52357700 | 4.59422600  | -3.00913400 |
| H | 5.83687000  | 0.73786700  | 2.93370000  |
| C | 3.03766100  | 3.97863500  | -0.28373000 |
| C | 4.00128400  | 4.26371600  | -1.48457400 |
| H | 4.25746800  | 3.31076800  | -1.96224100 |
| H | 4.93474000  | 4.73992700  | -1.16865400 |
| H | 5.17335200  | 5.48987800  | 1.10587700  |
| H | 4.18183400  | 5.45612500  | 2.56004300  |
| C | 0.51891300  | 3.23495600  | -0.66406900 |
| H | 0.62864400  | 5.53121500  | -3.80770600 |
| H | 5.86736000  | 3.20633000  | 3.18943800  |
| C | 3.16799400  | 5.12753400  | -2.45546800 |
| H | 3.46365400  | 4.99313700  | -3.50265400 |
| H | 3.27772500  | 6.19855400  | -2.23426200 |
| C | 4.29108500  | 5.01800400  | 1.56125400  |
| C | 3.03489100  | 5.20892600  | 0.68573700  |
| H | 2.13679500  | 5.15827700  | 1.31189300  |
| H | 3.01598300  | 6.16365800  | 0.15087800  |
| C | 4.40458500  | -0.77787900 | 1.31418800  |
| C | 4.04707200  | -1.56516600 | 2.43608800  |
| C | 4.97367400  | -1.39371700 | 0.17076200  |
| C | 3.41115400  | -1.00980200 | 3.59435300  |
| C | 4.31236800  | -2.98617800 | 2.43050800  |
| C | 5.18775200  | -2.82421000 | 0.16002400  |
| C | 3.11192100  | -1.78895300 | 4.68189700  |



|   |             |             |             |
|---|-------------|-------------|-------------|
| H | 3.13376800  | 0.03689900  | 3.58365500  |
| C | 3.99458400  | -3.75990000 | 3.59096800  |
| C | 4.86684500  | -3.57738100 | 1.29275800  |
| C | 3.42167300  | -3.17977300 | 4.69046200  |
| H | 2.62051000  | -1.34524100 | 5.54342000  |
| H | 4.21516200  | -4.82469700 | 3.57532400  |
| H | 5.05653800  | -4.64893400 | 1.28943300  |
| H | 3.18624500  | -3.77799100 | 5.56685200  |
| C | -2.01192900 | 2.97010300  | -0.96101500 |
| C | -2.76141700 | 2.19276300  | -1.88097600 |
| C | -2.57847200 | 3.32132100  | 0.29181600  |
| C | -2.24876400 | 1.78178800  | -3.15613000 |
| C | -4.10480600 | 1.77839700  | -1.54369000 |
| C | -3.90560800 | 2.85978500  | 0.63223000  |
| C | -3.01634300 | 1.06857600  | -4.04118800 |
| H | -1.23207300 | 2.05053300  | -3.41820400 |
| C | -4.86955100 | 1.02772900  | -2.49242100 |
| C | -4.63545400 | 2.11116100  | -0.29512600 |
| C | -4.34933700 | 0.68955000  | -3.71185600 |
| H | -2.60455100 | 0.78377300  | -5.00632100 |
| H | -5.87352400 | 0.72055700  | -2.21039600 |
| H | -5.63623800 | 1.77147000  | -0.03843700 |
| H | -4.94028200 | 0.12112200  | -4.42444200 |
| C | 5.94681400  | -1.27840500 | -2.07126900 |
| H | 6.26383100  | -0.68869400 | -2.92765400 |
| C | 5.39250300  | -0.65478300 | -0.98285800 |
| H | 5.27310500  | 0.42240300  | -0.98385100 |
| C | 6.12594700  | -2.69159100 | -2.08786600 |
| H | 6.56803100  | -3.16924400 | -2.95837600 |
| C | 5.75863800  | -3.43712100 | -1.00006600 |
| H | 5.90627200  | -4.51475200 | -0.99054200 |
| C | -2.47293800 | 4.45385500  | 2.45591900  |
| H | -1.93328600 | 5.07917400  | 3.16196100  |
| C | -3.76190500 | 3.95935300  | 2.80207800  |
| H | -4.19013600 | 4.20018100  | 3.77109700  |
| C | -4.45828600 | 3.19189200  | 1.90887600  |
| H | -5.44975800 | 2.81835700  | 2.15255900  |
| C | -1.90517700 | 4.14877200  | 1.24689200  |
| H | -0.92563900 | 4.54103000  | 1.00299400  |
| C | 1.49045500  | -1.83108400 | -3.84032800 |
| C | 1.83876300  | -2.85343800 | -2.69943500 |
| H | 2.46237400  | -3.67567600 | -3.06159200 |
| H | 2.40418400  | -2.35141700 | -1.91033800 |
| C | 0.50980800  | -3.82316100 | -0.66224600 |

|   |             |             |             |
|---|-------------|-------------|-------------|
| C | 0.99453300  | -2.94528800 | 0.31881400  |
| C | -0.02301200 | -5.05206400 | -0.24149000 |
| C | 0.91058000  | -3.25803200 | 1.67380800  |
| H | 1.42592700  | -1.99033300 | 0.04619000  |
| C | -0.07585000 | -5.38327000 | 1.11328100  |
| H | -0.40548000 | -5.76702600 | -0.95952100 |
| C | 0.37848800  | -4.48345400 | 2.07587500  |
| H | 1.25350600  | -2.53021300 | 2.40019100  |
| H | -0.48857900 | -6.34355800 | 1.41077800  |
| H | 0.32069200  | -4.73217000 | 3.13179600  |
| C | 0.50892000  | -3.41266600 | -2.13400700 |
| C | -0.03650600 | -1.57339500 | -3.66814700 |
| H | -0.66184900 | -2.12155100 | -4.37288800 |
| H | -0.30962100 | -0.51719000 | -3.69344400 |
| N | -0.34427300 | -2.08048000 | -2.28561900 |
| C | -1.79002900 | -2.12237200 | -1.86753000 |
| N | -1.90988600 | -1.46742200 | -0.70320700 |
| C | -2.99237200 | -1.33023500 | 0.19397600  |
| C | -4.32084400 | -1.64049100 | -0.10925000 |
| C | -2.65800900 | -0.81406600 | 1.45964600  |
| C | -5.30659300 | -1.41930600 | 0.85446200  |
| C | -3.65625800 | -0.62143800 | 2.40783100  |
| H | -1.62563800 | -0.56316900 | 1.69530400  |
| C | -4.98889400 | -0.92036600 | 2.11407500  |
| H | -5.76442900 | -0.75326700 | 2.85223000  |
| C | -3.31075000 | -0.12017300 | 3.78787600  |
| C | -6.74834800 | -1.61696200 | 0.47001000  |
| F | -3.25946200 | -1.14148400 | 4.67719200  |
| F | -4.25183900 | 0.74082400  | 4.24323600  |
| F | -2.12509400 | 0.50577500  | 3.82372200  |
| F | -7.24409900 | -0.50791400 | -0.14515700 |
| F | -7.53418700 | -1.85007100 | 1.54135600  |
| F | -6.91063500 | -2.64166600 | -0.39082700 |
| S | -2.91410500 | -2.90212900 | -2.79437300 |
| H | -4.58585100 | -2.02162500 | -1.08403500 |
| H | -1.09787000 | -0.86998100 | -0.45319300 |
| H | 0.11832900  | -1.36823400 | -1.66282400 |
| C | -0.02126000 | -4.51941600 | -3.05246600 |
| H | -0.06597700 | -4.20593600 | -4.09481500 |
| H | -1.01263000 | -4.86971000 | -2.77163200 |
| H | 0.68083300  | -5.35701300 | -2.98957200 |
| C | 2.28512700  | -0.52555900 | -3.64152300 |
| H | 3.36078100  | -0.73255000 | -3.65546300 |
| H | 2.06540400  | 0.18513100  | -4.44791700 |

|   |            |             |             |
|---|------------|-------------|-------------|
| H | 2.04791300 | -0.04625100 | -2.68785900 |
| C | 1.79125000 | -2.38356200 | -5.24581100 |
| H | 1.46917200 | -1.67376300 | -6.01734900 |
| H | 2.86922200 | -2.53630700 | -5.36889700 |
| H | 1.29407900 | -3.33900600 | -5.44258600 |
| O | 0.89885300 | 0.18725900  | 1.64495900  |

TS-PT-4

1 imaginary frequencies

H = -4333.082577

G = -4333.254037

E(M06-2X-DCM) = -4333.893064

|   |             |             |             |
|---|-------------|-------------|-------------|
| C | -1.45727200 | 3.44680700  | -2.58759000 |
| C | -0.11581500 | 3.55061100  | -3.35500700 |
| H | -0.22293500 | 3.25147300  | -4.40280900 |
| H | 0.22199900  | 4.58940900  | -3.35831600 |
| C | 2.27518900  | 3.38691600  | -2.43860800 |
| C | 2.30027800  | 4.68852800  | -1.90922100 |
| C | 3.50362500  | 2.80294500  | -2.78450600 |
| C | 3.49825100  | 5.37901400  | -1.73659500 |
| H | 1.37634500  | 5.17345000  | -1.61264400 |
| C | 4.70595600  | 3.49486900  | -2.61831000 |
| H | 3.54091000  | 1.80209700  | -3.19907600 |
| C | 4.70941800  | 4.78603500  | -2.09396600 |
| H | 3.48192400  | 6.38147000  | -1.31812900 |
| H | 5.63994900  | 3.01877900  | -2.90501000 |
| H | 5.64416800  | 5.32449800  | -1.96427200 |
| C | 0.94374000  | 2.65062500  | -2.65160400 |
| C | -0.96974100 | 3.19777400  | -1.15159400 |
| H | -1.70715200 | 2.70942200  | -0.50886100 |
| H | -0.66648400 | 4.12842600  | -0.66588100 |
| N | 0.22602900  | 2.30463000  | -1.27452200 |
| C | 1.08718400  | 2.25958700  | -0.08532900 |
| N | 1.84262700  | 1.13652200  | -0.10250900 |
| C | 2.69608600  | 0.72123500  | 0.97216200  |
| C | 4.07122500  | 0.69706700  | 0.76656700  |
| C | 2.13780900  | 0.27758600  | 2.17444100  |
| C | 4.90675500  | 0.21542300  | 1.77863200  |
| C | 2.98647500  | -0.17782400 | 3.18167600  |
| H | 1.05866400  | 0.27810900  | 2.29145400  |
| C | 4.37015200  | -0.21285100 | 2.99042800  |
| H | 5.02148400  | -0.56967100 | 3.77990200  |
| C | 2.41011200  | -0.71589100 | 4.46584600  |
| C | 6.37975900  | 0.07833300  | 1.51445700  |

|   |              |              |              |
|---|--------------|--------------|--------------|
| F | 3. 22192600  | -0. 45936200 | 5. 51829300  |
| F | 2. 25396500  | -2. 05991400 | 4. 41533900  |
| F | 1. 20261900  | -0. 18535400 | 4. 74348400  |
| F | 7. 10845700  | 0. 09513800  | 2. 64828500  |
| F | 6. 84561800  | 1. 05602800  | 0. 70917600  |
| F | 6. 65969300  | -1. 10099100 | 0. 88852800  |
| S | 1. 12056700  | 3. 40988500  | 1. 09747300  |
| C | -2. 24218300 | 4. 76656200  | -2. 67341700 |
| H | -2. 52286300 | 4. 97913100  | -3. 71199800 |
| H | -3. 16486500 | 4. 71330000  | -2. 08567900 |
| H | -1. 64882700 | 5. 61227700  | -2. 30509000 |
| C | -2. 35200100 | 2. 30231100  | -3. 10526100 |
| H | -2. 58869600 | 2. 45779300  | -4. 16502100 |
| H | -1. 89312500 | 1. 31644700  | -2. 99825500 |
| H | -3. 29669700 | 2. 27667600  | -2. 55131600 |
| H | 4. 48145300  | 1. 05524100  | -0. 17100700 |
| C | 1. 12241800  | 1. 34790200  | -3. 43823800 |
| H | 1. 56315800  | 0. 40212800  | -0. 74785000 |
| H | 0. 16302000  | 0. 86167800  | -3. 61456800 |
| H | 1. 57266100  | 1. 57328500  | -4. 40939600 |
| H | -0. 25731100 | 1. 07493400  | -1. 34092400 |
| H | 1. 76849800  | 0. 62530100  | -2. 93703400 |
| O | -0. 93890100 | -2. 26077800 | -0. 05513500 |
| O | -2. 86344000 | -0. 56827700 | -0. 43715300 |
| P | -1. 25828100 | -0. 65666900 | -0. 08941200 |
| O | -0. 88457900 | -0. 07577700 | 1. 22129000  |
| C | -1. 76254000 | -4. 75954600 | -3. 31190000 |
| C | -2. 78428200 | -4. 33936700 | -2. 46701600 |
| C | -2. 49860200 | -3. 57824800 | -1. 32297000 |
| C | -0. 13510400 | -3. 54847900 | -1. 93966600 |
| C | -0. 44893900 | -4. 39731500 | -3. 01617400 |
| C | -3. 73581300 | -1. 04590900 | 0. 54456900  |
| C | -4. 03960900 | -2. 40698300 | 0. 56913500  |
| C | -4. 79510100 | -2. 92244100 | 1. 63433400  |
| C | -5. 31875800 | -2. 08058700 | 2. 60876300  |
| C | -5. 08029000 | -0. 71027800 | 2. 51563400  |
| C | -4. 27867100 | -0. 16430000 | 1. 49972200  |
| H | 0. 36170700  | -4. 75789400 | -3. 64213900 |
| H | -5. 49908900 | -0. 03601700 | 3. 25701300  |
| C | -3. 73885900 | -3. 51598400 | -0. 43476000 |
| C | -4. 85999000 | -3. 63840700 | -1. 51944900 |
| H | -5. 81085500 | -3. 98296200 | -1. 10114900 |
| H | -5. 02826300 | -2. 65105000 | -1. 96466800 |
| H | -4. 72855500 | -4. 92011100 | 2. 50838500  |

|   |             |             |             |
|---|-------------|-------------|-------------|
| H | -5.88128500 | -4.74630000 | 1.18870500  |
| C | -1.19921200 | -3.11472400 | -1.11899600 |
| H | -1.97650500 | -5.37397200 | -4.18290300 |
| H | -5.90462500 | -2.47938300 | 3.43306600  |
| C | -4.27174800 | -4.59824400 | -2.57756100 |
| H | -4.51375000 | -5.64548100 | -2.34881900 |
| H | -4.65508100 | -4.40199800 | -3.58563300 |
| C | -4.88985000 | -4.42908000 | 1.54199700  |
| C | -3.79208300 | -4.76481700 | 0.51184000  |
| H | -3.97429600 | -5.69575400 | -0.03377200 |
| H | -2.82602100 | -4.85964700 | 1.02091900  |
| C | -4.08425800 | 1.32114500  | 1.47326600  |
| C | -4.79749000 | 2.09850500  | 0.52759800  |
| C | -3.29786700 | 1.95295800  | 2.46703900  |
| C | -5.62808300 | 1.51942800  | -0.48617500 |
| C | -4.72451500 | 3.54137600  | 0.58855000  |
| C | -3.23595400 | 3.39682900  | 2.51771700  |
| C | -6.32073700 | 2.29894700  | -1.37661300 |
| H | -5.71054300 | 0.43959500  | -0.53919000 |
| C | -5.46601600 | 4.31811200  | -0.35736600 |
| C | -3.94952300 | 4.14913400  | 1.58083600  |
| C | -6.24050500 | 3.71969100  | -1.31532900 |
| H | -6.94429500 | 1.83072400  | -2.13364100 |
| H | -5.40654200 | 5.40226300  | -0.29020400 |
| H | -3.90581000 | 5.23561400  | 1.62887100  |
| H | -6.80152500 | 4.32248800  | -2.02444900 |
| C | 1.28769600  | -3.15951300 | -1.69170400 |
| C | 1.91932000  | -3.50357500 | -0.46718100 |
| C | 2.03217200  | -2.50384000 | -2.70893700 |
| C | 1.26403400  | -4.24762000 | 0.56616700  |
| C | 3.29409700  | -3.12120400 | -0.23596700 |
| C | 3.42210100  | -2.17166300 | -2.47788500 |
| C | 1.89404200  | -4.54068800 | 1.74673400  |
| H | 0.24917200  | -4.58953300 | 0.40393400  |
| C | 3.91323900  | -3.43534000 | 1.01518500  |
| C | 4.00671200  | -2.46448600 | -1.24281100 |
| C | 3.23166000  | -4.11666400 | 1.98589600  |
| H | 1.36734900  | -5.10247500 | 2.51316700  |
| H | 4.93740600  | -3.10930500 | 1.17403000  |
| H | 5.04109400  | -2.18185300 | -1.06001600 |
| H | 3.70528100  | -4.34195500 | 2.93703700  |
| C | -1.78865600 | 1.86111300  | 4.38456300  |
| H | -1.19818000 | 1.27996500  | 5.08721600  |
| C | -2.53788500 | 1.21933500  | 3.43448100  |

|   |             |             |             |
|---|-------------|-------------|-------------|
| H | -2.53066300 | 0.13852500  | 3.38005300  |
| C | -1.74635000 | 3.28377000  | 4.44108900  |
| H | -1.14516100 | 3.77368300  | 5.20227500  |
| C | -2.44736200 | 4.02693100  | 3.53110800  |
| H | -2.41453500 | 5.11359300  | 3.55639400  |
| C | 2.24178500  | -1.56698800 | -4.96310800 |
| H | 1.79110900  | -1.31962400 | -5.92071200 |
| C | 3.61690000  | -1.27247700 | -4.73867600 |
| H | 4.20993200  | -0.82197800 | -5.53014300 |
| C | 4.18041100  | -1.55285600 | -3.52265400 |
| H | 5.22711000  | -1.32806000 | -3.33044700 |
| C | 1.47685200  | -2.14242800 | -3.98124700 |
| H | 0.42581200  | -2.32873100 | -4.16475200 |
| O | -0.60237300 | -0.07327400 | -1.37725300 |

TS-PT-4鈦?1 imaginary frequencies

H = -4333.080442

G = -4333.250448

E(M06-2X-DCM) = -4333.889867

|   |             |            |             |
|---|-------------|------------|-------------|
| O | -0.31045100 | 2.10257200 | -0.64204700 |
| O | -2.58700000 | 1.09767300 | 0.09661100  |
| P | -0.99845000 | 0.71812800 | -0.10893600 |
| O | -0.55241700 | 0.46182500 | 1.35011500  |
| C | -0.48758700 | 5.63370600 | 1.61491100  |
| C | -1.57863400 | 5.21921000 | 0.86011600  |
| C | -1.49024100 | 4.08656400 | 0.03571200  |
| C | 0.79658900  | 3.71331400 | 0.79687300  |
| C | 0.69595400  | 4.90324000 | 1.54121200  |
| C | -3.37196600 | 1.46074200 | -0.99719000 |
| C | -3.30643900 | 2.76756700 | -1.48272200 |
| C | -3.97346600 | 3.09550500 | -2.67384000 |
| C | -4.80871100 | 2.17559200 | -3.29644100 |
| C | -4.97402100 | 0.92024800 | -2.71692500 |
| C | -4.25460700 | 0.52388900 | -1.57457300 |
| H | 1.57173800  | 5.24136900 | 2.08633900  |
| H | -5.66148800 | 0.20796700 | -3.16260500 |
| C | -2.70817200 | 4.03298200 | -0.87855900 |
| C | -3.76160800 | 4.76533300 | 0.02043700  |
| H | -4.16844500 | 4.04618700 | 0.74092100  |
| H | -4.59891300 | 5.16697700 | -0.55831300 |
| H | -4.50137700 | 5.18244500 | -2.94223200 |
| H | -3.39005500 | 4.57500100 | -4.16423700 |
| C | -0.34354300 | 3.29358400 | 0.08032900  |
| H | -0.54488100 | 6.52250400 | 2.23834800  |

|   |             |             |             |
|---|-------------|-------------|-------------|
| H | -5.34066500 | 2.43210900  | -4.20908900 |
| C | -2.95125400 | 5.84790000  | 0.76343700  |
| H | -3.37060100 | 6.09021000  | 1.74685800  |
| H | -2.92140800 | 6.78810600  | 0.19514900  |
| C | -3.64693900 | 4.50965900  | -3.10067700 |
| C | -2.46397100 | 4.87171200  | -2.17846400 |
| H | -1.52287700 | 4.54474200  | -2.63532300 |
| H | -2.38142200 | 5.94373200  | -1.97535800 |
| C | -4.51865400 | -0.83894400 | -1.01972000 |
| C | -4.32385600 | -1.97785100 | -1.84322300 |
| C | -5.10128000 | -0.98774900 | 0.26593900  |
| C | -3.69962400 | -1.90724100 | -3.13247000 |
| C | -4.75518400 | -3.27892500 | -1.38335200 |
| C | -5.47357700 | -2.30476700 | 0.73394000  |
| C | -3.57342900 | -3.01782400 | -3.92727400 |
| H | -3.30314500 | -0.95725500 | -3.46977700 |
| C | -4.60900200 | -4.41094600 | -2.24561200 |
| C | -5.30300000 | -3.40907000 | -0.10519900 |
| C | -4.04878800 | -4.28665500 | -3.48820000 |
| H | -3.09257400 | -2.93284700 | -4.89800400 |
| H | -4.95265100 | -5.37776600 | -1.88562200 |
| H | -5.61320700 | -4.39258000 | 0.24191100  |
| H | -3.94765900 | -5.15381600 | -4.13522100 |
| C | 2.11173500  | 3.00276100  | 0.77393100  |
| C | 2.69736000  | 2.57895700  | 1.99481800  |
| C | 2.83492500  | 2.87432000  | -0.44049000 |
| C | 2.01744700  | 2.65407300  | 3.25550100  |
| C | 4.04100400  | 2.04637800  | 1.99805500  |
| C | 4.15358300  | 2.28207400  | -0.42647600 |
| C | 2.63765200  | 2.29895400  | 4.42610000  |
| H | 0.99106100  | 3.00145200  | 3.27525700  |
| C | 4.65032500  | 1.68728000  | 3.24113300  |
| C | 4.72363200  | 1.89363900  | 0.78910300  |
| C | 3.97870900  | 1.82202100  | 4.42579100  |
| H | 2.09817100  | 2.37666700  | 5.36676500  |
| H | 5.66651900  | 1.30126500  | 3.22031700  |
| H | 5.71988800  | 1.45751100  | 0.79049700  |
| H | 4.45568900  | 1.54999000  | 5.36329800  |
| C | -5.94944400 | -0.05926400 | 2.36456700  |
| H | -6.15537600 | 0.80308900  | 2.99293300  |
| C | -5.38643100 | 0.12016900  | 1.12786800  |
| H | -5.15858400 | 1.12254100  | 0.78670500  |
| C | -6.27602400 | -1.36300500 | 2.83504300  |
| H | -6.71980900 | -1.48624100 | 3.81935400  |

|   |             |             |             |
|---|-------------|-------------|-------------|
| C | -6.04729500 | -2.45058300 | 2.03647000  |
| H | -6.31005700 | -3.45122300 | 2.37185600  |
| C | 3.05643900  | 3.17855700  | -2.85661000 |
| H | 2.64675000  | 3.53232500  | -3.79878300 |
| C | 4.33568600  | 2.55495200  | -2.84069300 |
| H | 4.88271100  | 2.42555000  | -3.77025300 |
| C | 4.86946500  | 2.12801200  | -1.65565200 |
| H | 5.84557100  | 1.65204300  | -1.62141500 |
| C | 2.33689500  | 3.33610800  | -1.70126800 |
| H | 1.36993000  | 3.82265100  | -1.73876200 |
| C | -1.20014500 | -1.28058500 | 4.27111300  |
| C | -1.52365500 | -2.50410200 | 3.35073200  |
| H | -1.95020900 | -3.34286900 | 3.91016400  |
| H | -2.25991900 | -2.21841600 | 2.59504200  |
| C | -0.35301200 | -3.64843600 | 1.32868000  |
| C | -1.16418500 | -3.11166400 | 0.31934100  |
| C | 0.33652300  | -4.84023000 | 1.04679800  |
| C | -1.25021300 | -3.71389400 | -0.93513300 |
| H | -1.71856800 | -2.19563900 | 0.48432500  |
| C | 0.22629400  | -5.46334500 | -0.19645100 |
| H | 0.97288100  | -5.30114700 | 1.79138400  |
| C | -0.56026200 | -4.89672300 | -1.19714000 |
| H | -1.84611800 | -3.24417500 | -1.70721500 |
| H | 0.77016800  | -6.38616300 | -0.38042600 |
| H | -0.63517400 | -5.36739300 | -2.17354300 |
| C | -0.20169500 | -2.93456900 | 2.67439400  |
| C | 0.23159000  | -0.85014400 | 3.82802900  |
| H | 1.00504700  | -1.17567200 | 4.52463400  |
| H | 0.33700500  | 0.22629300  | 3.68524800  |
| N | 0.44422400  | -1.51312900 | 2.49539200  |
| C | 1.82433600  | -1.52767700 | 1.97307300  |
| N | 1.78901600  | -1.47760800 | 0.61976700  |
| C | 2.80200200  | -1.50170100 | -0.36501100 |
| C | 4.16849600  | -1.65980300 | -0.11017700 |
| C | 2.35293600  | -1.35263600 | -1.69102100 |
| C | 5.06678500  | -1.66279000 | -1.18021700 |
| C | 3.26587100  | -1.37402300 | -2.73784300 |
| H | 1.29457200  | -1.20552800 | -1.88841000 |
| C | 4.63279200  | -1.52969600 | -2.49491300 |
| H | 5.33975800  | -1.54931100 | -3.31561600 |
| C | 2.79479000  | -1.16336000 | -4.15364900 |
| C | 6.54116300  | -1.72817900 | -0.88431700 |
| F | 1.49671800  | -1.48658600 | -4.31315400 |
| F | 3.51215400  | -1.91100300 | -5.02588700 |



|   |             |             |             |
|---|-------------|-------------|-------------|
| F | 2.93786200  | 0.12540000  | -4.54015200 |
| F | 7.04925900  | -0.49016700 | -0.63006300 |
| F | 7.24625700  | -2.22854400 | -1.92066900 |
| F | 6.81176400  | -2.48418700 | 0.19909400  |
| S | 3.14825300  | -1.60662000 | 2.96538000  |
| H | 4.52630500  | -1.77234800 | 0.90174700  |
| H | 0.86496200  | -1.36746100 | 0.20032800  |
| H | -0.18223800 | -0.61322800 | 1.76405100  |
| C | 0.62475600  | -3.78065000 | 3.66089000  |
| H | 0.74451500  | -3.28866100 | 4.62436500  |
| H | 1.62415500  | -4.00912200 | 3.29071300  |
| H | 0.09204300  | -4.72114100 | 3.83299700  |
| C | -2.23131600 | -0.15704500 | 4.04497600  |
| H | -3.23920400 | -0.51606600 | 4.28450400  |
| H | -2.01727300 | 0.70049000  | 4.69505100  |
| H | -2.23165500 | 0.19549800  | 3.01132200  |
| C | -1.21458300 | -1.64376800 | 5.76890600  |
| H | -0.90810500 | -0.78376900 | 6.37686400  |
| H | -2.22654800 | -1.92477300 | 6.08313700  |
| H | -0.54740700 | -2.47673400 | 6.01208100  |
| O | -0.72956500 | -0.35199100 | -1.10908400 |

AT-3

0 imaginary frequencies

H = -1995.965760

G = -1996.065642

E(M06-2X-DCM) = -1996.320217

|   |             |             |             |
|---|-------------|-------------|-------------|
| C | 4.17414400  | 0.76567600  | -0.43859600 |
| C | 5.44519600  | 0.46732500  | -1.31008600 |
| H | 5.47465400  | 1.18077600  | -2.14486700 |
| H | 6.32412000  | 0.67833500  | -0.68500700 |
| C | 5.54687100  | -0.93464200 | -1.84625100 |
| C | 2.95006200  | 0.52571100  | -1.35905400 |
| H | 2.91813900  | -0.50493900 | -1.71328300 |
| H | 3.07245800  | 1.15449500  | -2.25336700 |
| N | 1.66709400  | 0.81919300  | -0.73438100 |
| C | 0.51358800  | 0.13026800  | -0.92413600 |
| N | -0.55567800 | 0.74770000  | -0.29237900 |
| C | -1.90299700 | 0.35685000  | -0.17718400 |
| C | -2.31692200 | -0.97798900 | -0.06751000 |
| C | -2.85902500 | 1.37759200  | -0.08906000 |
| C | -3.67038200 | -1.26540300 | 0.10496500  |
| C | -4.20550800 | 1.07286900  | 0.09949700  |
| H | -2.55160600 | 2.41674000  | -0.16389800 |

|   |             |             |             |
|---|-------------|-------------|-------------|
| C | -4.62591800 | -0.25268400 | 0.19151200  |
| H | -5.67117200 | -0.49075000 | 0.34585100  |
| C | -5.21725400 | 2.18789500  | 0.13865300  |
| C | -4.11165700 | -2.70634800 | 0.16737900  |
| F | -5.66280300 | 2.50034100  | -1.09923900 |
| F | -4.69346000 | 3.32013300  | 0.66322300  |
| F | -6.29800900 | 1.85908600  | 0.87683700  |
| F | -5.22960000 | -2.85226500 | 0.91383100  |
| F | -3.16010600 | -3.50135500 | 0.70096300  |
| F | -4.39229400 | -3.19195000 | -1.06173100 |
| S | 0.40424900  | -1.28507700 | -1.82355900 |
| C | 4.26656900  | 2.28207400  | -0.05131100 |
| H | 4.19194500  | 2.87672700  | -0.97110700 |
| H | 5.27541400  | 2.46864000  | 0.34265700  |
| H | -1.59033400 | -1.77593000 | -0.11198200 |
| C | 5.63530500  | -1.24635100 | -3.14025400 |
| H | -0.39273500 | 1.70640200  | -0.00684100 |
| H | 5.72119100  | -2.27646800 | -3.47497700 |
| H | 1.64613000  | 1.64727800  | -0.14770900 |
| C | 4.19146000  | -0.13976300 | 0.80577600  |
| C | 3.33562500  | -1.24252200 | 0.94983300  |
| C | 5.13224800  | 0.08977200  | 1.82582200  |
| C | 3.41169400  | -2.07260600 | 2.07147600  |
| H | 2.59927800  | -1.47502300 | 0.18816600  |
| C | 5.20888300  | -0.73618700 | 2.94662500  |
| H | 5.82535400  | 0.92340600  | 1.74990700  |
| C | 4.34428800  | -1.82392800 | 3.07667300  |
| H | 2.73359300  | -2.91805100 | 2.15195400  |
| H | 5.94784300  | -0.52892100 | 3.71634500  |
| H | 4.40026000  | -2.46969200 | 3.94876000  |
| C | 3.27872500  | 2.79948300  | 0.96340000  |
| C | 2.47806600  | 3.85612700  | 0.78311300  |
| H | 2.47577800  | 4.42250200  | -0.14680100 |
| H | 5.62819000  | -0.48361900 | -3.91681400 |
| H | 1.81919400  | 4.21347500  | 1.57065200  |
| H | 5.55672500  | -1.73210200 | -1.10401000 |
| H | 3.25575600  | 2.27449100  | 1.91798500  |

AT-3-1

0 imaginary frequencies

H = -1995.963958

G = -1996.064069

E(M06-2X-DCM) = -1996.319612

0 1

|   |             |             |             |
|---|-------------|-------------|-------------|
| C | -4.13045300 | 0.80502800  | 0.57980100  |
| C | -5.39628600 | 0.50209300  | 1.46237900  |
| H | -5.39546800 | 1.21724200  | 2.29928300  |
| H | -6.28454300 | 0.72452600  | 0.86044600  |
| C | -5.50710500 | -0.89671600 | 2.00809600  |
| C | -2.89141200 | 0.51597400  | 1.46464600  |
| H | -2.85410400 | -0.53112500 | 1.76522700  |
| H | -2.98835000 | 1.10457400  | 2.38931800  |
| N | -1.61823500 | 0.82175200  | 0.82721400  |
| C | -0.46541800 | 0.12546400  | 0.99162600  |
| N | 0.59638300  | 0.73903900  | 0.34506800  |
| C | 1.94069500  | 0.34216100  | 0.21293900  |
| C | 2.34458100  | -0.99399800 | 0.08533600  |
| C | 2.90312100  | 1.35760000  | 0.13535200  |
| C | 3.69594500  | -1.28891000 | -0.09094900 |
| C | 4.24697900  | 1.04566900  | -0.06072800 |
| H | 2.60533600  | 2.39671300  | 0.24178300  |
| C | 4.65812400  | -0.28162800 | -0.16719500 |
| H | 5.70355600  | -0.52570300 | -0.31065300 |
| C | 5.24992100  | 2.15855100  | -0.21390000 |
| C | 4.12886900  | -2.73204800 | -0.15941700 |
| F | 6.48138600  | 1.78500700  | 0.19046800  |
| F | 4.89835800  | 3.25241000  | 0.49972300  |
| F | 5.35920700  | 2.55293700  | -1.50420300 |
| F | 5.24594500  | -2.88116400 | -0.90654600 |
| F | 3.17248800  | -3.51869800 | -0.69648600 |
| F | 4.40675900  | -3.22465100 | 1.06752500  |
| S | -0.35019500 | -1.29529300 | 1.88266500  |
| C | -4.20377200 | 2.33607200  | 0.24658200  |
| H | -4.09209800 | 2.89769100  | 1.18327500  |
| H | -5.21964200 | 2.55401600  | -0.11143000 |
| H | 1.61296000  | -1.78763300 | 0.12489800  |
| C | -6.41979900 | -1.78784700 | 1.61965200  |
| H | 0.43268400  | 1.69770000  | 0.05979000  |
| H | -6.46503500 | -2.78398600 | 2.05128000  |
| H | -1.60517500 | 1.65743800  | 0.25118400  |
| C | -4.18580900 | -0.05694500 | -0.69248600 |
| C | -3.35480500 | -1.16953400 | -0.88875300 |
| C | -5.13679700 | 0.22676000  | -1.68854000 |
| C | -3.46325900 | -1.95724300 | -2.03752500 |
| H | -2.61172200 | -1.44365500 | -0.14791800 |
| C | -5.24719500 | -0.55730500 | -2.83633900 |
| H | -5.81210000 | 1.07046500  | -1.57253400 |
| C | -4.40595500 | -1.65570800 | -3.01843200 |

|   |             |             |             |
|---|-------------|-------------|-------------|
| H | -2.80338100 | -2.81226900 | -2.15833900 |
| H | -5.99344700 | -0.30854100 | -3.58656500 |
| H | -4.48752500 | -2.26892300 | -3.91177700 |
| C | -3.23627000 | 2.87086500  | -0.77885900 |
| C | -2.41073700 | 3.90603400  | -0.58610100 |
| H | -2.37008200 | 4.43906500  | 0.36246900  |
| H | -7.15526600 | -1.55655300 | 0.85189800  |
| H | -1.76902400 | 4.27924200  | -1.38043500 |
| H | -4.79597700 | -1.17969000 | 2.78404200  |
| H | -3.25177400 | 2.37963900  | -1.75129100 |

AT-3-2

0 imaginary frequencies

H = -1995.962103

G = -1996.062812

E(M06-2X-DCM) = -1996.316907

|   |             |             |             |
|---|-------------|-------------|-------------|
| C | 3.96784100  | 0.54940700  | -0.32080600 |
| C | 4.05085100  | 1.19500100  | -1.75244800 |
| H | 5.01404800  | 1.71607500  | -1.82240400 |
| H | 4.09103500  | 0.38370300  | -2.49039200 |
| C | 2.98556600  | 2.18593600  | -2.15164900 |
| C | 2.79600400  | -0.46112900 | -0.23931800 |
| H | 2.80004400  | -0.96143800 | 0.73007700  |
| H | 2.91966200  | -1.23788300 | -1.00671300 |
| N | 1.48668900  | 0.16318000  | -0.38634200 |
| C | 0.32525500  | -0.42457100 | 0.01987000  |
| N | -0.76773000 | 0.37579200  | -0.28857300 |
| C | -2.14569900 | 0.14195300  | -0.13111100 |
| C | -2.73639000 | -1.12236800 | -0.26922300 |
| C | -2.96271900 | 1.25430300  | 0.11029500  |
| C | -4.11836600 | -1.25195700 | -0.14473400 |
| C | -4.34461100 | 1.10826200  | 0.21841700  |
| H | -2.51803600 | 2.23768300  | 0.23327800  |
| C | -4.93586900 | -0.14756400 | 0.10019300  |
| H | -6.00714900 | -0.26606300 | 0.20755900  |
| C | -5.20292900 | 2.32956000  | 0.41785600  |
| C | -4.75382400 | -2.60393000 | -0.35283400 |
| F | -5.54801200 | 2.89051600  | -0.76487600 |
| F | -4.56035000 | 3.28413600  | 1.12883300  |
| F | -6.34916700 | 2.03888200  | 1.06660900  |
| F | -3.91936200 | -3.61210700 | -0.03192300 |
| F | -5.11401100 | -2.78241000 | -1.64599200 |
| F | -5.87464400 | -2.74592400 | 0.38868200  |
| S | 0.24657100  | -1.89370400 | 0.81828700  |

|   |             |             |             |
|---|-------------|-------------|-------------|
| C | 3.78245900  | 1.65770900  | 0.76646000  |
| H | 2.82052500  | 2.15626700  | 0.60750400  |
| H | 4.55908700  | 2.42100500  | 0.61593500  |
| H | -2.12175000 | -1.99121500 | -0.45459500 |
| C | 2.17905500  | 2.06105300  | -3.21146900 |
| H | -0.54112600 | 1.34827600  | -0.46156600 |
| H | 1.46708500  | 2.83597000  | -3.48421700 |
| H | 1.41781500  | 0.85599000  | -1.12603700 |
| C | 5.30482600  | -0.19389000 | -0.09057700 |
| C | 5.39357900  | -1.58220100 | 0.09003100  |
| C | 6.50612500  | 0.53726700  | -0.05904800 |
| C | 6.62641400  | -2.21116800 | 0.28711700  |
| H | 4.50399200  | -2.20110400 | 0.08582300  |
| C | 7.73664800  | -0.08503900 | 0.14020300  |
| H | 6.48836200  | 1.61650800  | -0.18571800 |
| C | 7.80411000  | -1.46867500 | 0.31252400  |
| H | 6.65667700  | -3.28891000 | 0.42342800  |
| H | 8.64326900  | 0.51403600  | 0.16135500  |
| H | 8.76165900  | -1.95829700 | 0.46686700  |
| C | 3.84286600  | 1.15927500  | 2.18621000  |
| C | 2.83675100  | 1.23400400  | 3.05838500  |
| H | 1.87410700  | 1.66451800  | 2.79010300  |
| H | 2.21924400  | 1.18842900  | -3.86082000 |
| H | 2.93313300  | 0.86280000  | 4.07497700  |
| H | 2.91696800  | 3.09257300  | -1.54937700 |
| H | 4.78576900  | 0.71227200  | 2.49867200  |

AT-3-3

0 imaginary frequencies

H = -1995.960250

G = -1996.060119

E(M06-2X-DCM) = -1996.316409

|   |             |             |             |
|---|-------------|-------------|-------------|
| C | -3.77022800 | -0.68391800 | 0.02606700  |
| C | -4.24743800 | -2.09528100 | 0.49818600  |
| H | -4.86429700 | -1.96945400 | 1.39429400  |
| H | -4.89163500 | -2.51583400 | -0.28406200 |
| C | -3.17046400 | -3.11432000 | 0.78234400  |
| C | -2.74722300 | -0.83185000 | -1.15101300 |
| H | -2.67405000 | 0.09380700  | -1.71757900 |
| H | -3.10901600 | -1.60681400 | -1.83941800 |
| N | -1.38330400 | -1.16039100 | -0.75185700 |
| C | -0.31034800 | -0.32594500 | -0.84486400 |
| N | 0.84299800  | -0.94125900 | -0.38074500 |
| C | 2.14737900  | -0.42679600 | -0.23906300 |

|   |             |             |             |
|---|-------------|-------------|-------------|
| C | 2.41136800  | 0.87926600  | 0.19561500  |
| C | 3.21562300  | -1.30294700 | -0.46417400 |
| C | 3.73108800  | 1.28932500  | 0.37545500  |
| C | 4.52951700  | -0.88169700 | -0.26369200 |
| H | 3.02405700  | -2.32010200 | -0.79364700 |
| C | 4.80005000  | 0.42025100  | 0.15140600  |
| H | 5.81995200  | 0.74607700  | 0.31520000  |
| C | 5.66203100  | -1.82914600 | -0.56178000 |
| C | 4.01081300  | 2.71198600  | 0.79122200  |
| F | 6.75804500  | -1.54813300 | 0.17326700  |
| F | 6.02986100  | -1.77219900 | -1.86146700 |
| F | 5.31779600  | -3.11307700 | -0.30820200 |
| F | 5.14015200  | 2.80006100  | 1.52929000  |
| F | 3.00337100  | 3.22921400  | 1.52550900  |
| F | 4.17688600  | 3.51706900  | -0.28076500 |
| S | -0.36396000 | 1.22742500  | -1.47800700 |
| C | -3.10052900 | 0.07484800  | 1.21802700  |
| H | -2.65700300 | 0.99895100  | 0.82449800  |
| H | -2.26970600 | -0.52541700 | 1.60390800  |
| H | 1.59679700  | 1.56023700  | 0.39547600  |
| C | -2.73287000 | -3.46977700 | 1.99380600  |
| H | 0.80434500  | -1.95350900 | -0.34741700 |
| H | -1.97760600 | -4.24030600 | 2.12721900  |
| H | -1.28346200 | -1.97990200 | -0.16351000 |
| C | -4.95860600 | 0.15084100  | -0.50485300 |
| C | -4.71715800 | 1.43309800  | -1.03357100 |
| C | -6.29030900 | -0.28593000 | -0.45803000 |
| C | -5.75611500 | 2.23279200  | -1.50529600 |
| H | -3.70260800 | 1.82041600  | -1.07882600 |
| C | -7.33489600 | 0.51386100  | -0.93085300 |
| H | -6.53904700 | -1.25599600 | -0.04332000 |
| C | -7.07443100 | 1.77542500  | -1.45980900 |
| H | -5.53185500 | 3.21634500  | -1.90956400 |
| H | -8.35509000 | 0.14217600  | -0.88028000 |
| H | -7.88593500 | 2.39657400  | -1.82900300 |
| C | -4.02992100 | 0.41509500  | 2.35230800  |
| C | -3.84004700 | 0.05936700  | 3.62467200  |
| H | -2.97705900 | -0.52775600 | 3.93403100  |
| H | -3.12940500 | -3.01389100 | 2.89806500  |
| H | -4.52946400 | 0.35652700  | 4.41060100  |
| H | -2.75754500 | -3.63065300 | -0.08799400 |
| H | -4.90358900 | 1.01357600  | 2.09632600  |

0 imaginary frequencies

H = -1995.960049

G = -1996.059913

E(M06-2X-DCM) = -1996.316346

|   |             |             |             |
|---|-------------|-------------|-------------|
| C | -4.15619100 | -0.74841200 | -0.59349400 |
| C | -5.41077800 | -0.32013300 | -1.44231600 |
| H | -5.41813900 | -0.89937600 | -2.37551000 |
| H | -6.30243600 | -0.62331900 | -0.87617700 |
| C | -5.50810000 | 1.14604500  | -1.76427200 |
| C | -2.92153900 | -0.36416500 | -1.44799200 |
| H | -2.89649400 | 0.70862100  | -1.64161200 |
| H | -3.02843400 | -0.84854700 | -2.42983800 |
| N | -1.64243300 | -0.74000100 | -0.86150200 |
| C | -0.48475500 | -0.04256100 | -0.97909900 |
| N | 0.57672600  | -0.71804900 | -0.39434100 |
| C | 1.92628100  | -0.34819700 | -0.24341900 |
| C | 2.34844600  | 0.96932400  | -0.01761500 |
| C | 2.87667700  | -1.37805100 | -0.25146000 |
| C | 3.70474000  | 1.23335400  | 0.16956600  |
| C | 4.22576400  | -1.09837700 | -0.04339600 |
| H | 2.56506200  | -2.40240700 | -0.43418400 |
| C | 4.65471600  | 0.21177200  | 0.16074300  |
| H | 5.70419900  | 0.43146700  | 0.31372200  |
| C | 5.21556600  | -2.23170900 | 0.01623400  |
| C | 4.15639900  | 2.66165200  | 0.34436700  |
| F | 6.44807800  | -1.84404200 | -0.37155300 |
| F | 4.84361700  | -3.26500200 | -0.77328200 |
| F | 5.33179500  | -2.72264300 | 1.27243100  |
| F | 4.43174300  | 3.24340600  | -0.84350800 |
| F | 5.28069400  | 2.73981000  | 1.09162200  |
| F | 3.21407700  | 3.41662100  | 0.94782800  |
| S | -0.36389300 | 1.44509000  | -1.75074500 |
| C | -4.26491300 | -2.30232500 | -0.46642700 |
| H | -4.17635900 | -2.70795300 | -1.48457300 |
| H | -5.29266700 | -2.55972400 | -0.16790700 |
| H | 1.62685300  | 1.77256100  | 0.00883200  |
| C | -5.57039700 | 1.64711400  | -2.99899100 |
| H | 0.40625900  | -1.69673100 | -0.19390900 |
| H | -5.65627300 | 2.71535200  | -3.17800500 |
| H | -1.64039800 | -1.59769100 | -0.31929600 |
| C | -4.21965300 | -0.02598600 | 0.76253600  |
| C | -3.39115500 | 1.06255200  | 1.07663400  |
| C | -5.18235600 | -0.40798500 | 1.71296300  |
| C | -3.51378100 | 1.73179300  | 2.29778900  |

|   |             |             |             |
|---|-------------|-------------|-------------|
| H | -2.63830400 | 1.40535100  | 0.37474000  |
| C | -5.30739500 | 0.25893500  | 2.93035600  |
| H | -5.84556000 | -1.24390900 | 1.50772600  |
| C | -4.46946900 | 1.33434700  | 3.23096000  |
| H | -2.85532100 | 2.56933100  | 2.51233800  |
| H | -6.06031700 | -0.06422700 | 3.64455000  |
| H | -4.56260500 | 1.85529600  | 4.17995300  |
| C | -3.34756300 | -3.11634700 | 0.42507200  |
| C | -2.61821400 | -2.75149200 | 1.48596200  |
| H | -2.58039400 | -1.73330900 | 1.85846300  |
| H | -5.54050500 | 1.00917000  | -3.88043300 |
| H | -2.04782300 | -3.49412800 | 2.03878600  |
| H | -5.54081200 | 1.82376200  | -0.91201300 |
| H | -3.34134800 | -4.17492000 | 0.15714700  |

AT-4

0 imaginary frequencies

H = -2074.545648

G = -2074.653087

E(M06-2X-DCM) = -2074.938512

|   |             |             |             |
|---|-------------|-------------|-------------|
| C | -3.94624100 | 0.72531700  | 0.42906800  |
| C | -5.26551800 | 0.24020900  | 1.12982000  |
| H | -5.31206700 | 0.68903000  | 2.13164500  |
| H | -6.10622700 | 0.66030500  | 0.55986100  |
| C | -5.43285500 | -1.25052900 | 1.23982500  |
| C | -2.77508600 | 0.18878500  | 1.28942500  |
| H | -2.78936000 | -0.90010400 | 1.34075400  |
| H | -2.91973400 | 0.54721100  | 2.31933400  |
| N | -1.45802300 | 0.59526100  | 0.81697700  |
| C | -0.33069600 | -0.15607900 | 0.86331700  |
| N | 0.77840700  | 0.56351700  | 0.44174700  |
| C | 2.11976700  | 0.17015300  | 0.28069000  |
| C | 2.50751600  | -1.10828900 | -0.14440400 |
| C | 3.10272900  | 1.14616700  | 0.49313300  |
| C | 3.86098100  | -1.39134000 | -0.32362300 |
| C | 4.44945200  | 0.85142900  | 0.29045200  |
| H | 2.81784800  | 2.13818500  | 0.83156000  |
| C | 4.84314000  | -0.42338300 | -0.11189200 |
| H | 5.89029000  | -0.65636700 | -0.26126000 |
| C | 5.47741700  | 1.93945700  | 0.45453500  |
| C | 4.27282600  | -2.78819000 | -0.71575800 |
| F | 5.66249300  | 2.62462300  | -0.69828500 |
| F | 6.67920000  | 1.44589700  | 0.81748300  |
| F | 5.10646400  | 2.84361300  | 1.38979600  |



|   |             |             |             |
|---|-------------|-------------|-------------|
| F | 4.48789500  | -3.56448000 | 0.36895800  |
| F | 5.41984600  | -2.78565100 | -1.43204800 |
| F | 3.32918100  | -3.40020600 | -1.46194400 |
| S | -0.29065500 | -1.75470100 | 1.38160900  |
| C | -3.98045900 | 2.29157400  | 0.48296000  |
| H | -3.93676700 | 2.59675500  | 1.53684400  |
| H | -4.96623500 | 2.61753700  | 0.12215600  |
| H | 1.76136200  | -1.86704300 | -0.32911200 |
| C | -5.55854200 | -1.91900600 | 2.39042400  |
| H | 0.64894800  | 1.56766500  | 0.39826600  |
| H | -1.40037400 | 1.54302700  | 0.45656000  |
| C | -3.92536100 | 0.20726000  | -1.01968800 |
| C | -4.80299600 | 0.75497300  | -1.97253400 |
| C | -3.09843500 | -0.84860000 | -1.43317700 |
| C | -4.84633000 | 0.27996500  | -3.28281700 |
| H | -5.47211800 | 1.56454700  | -1.69366400 |
| C | -3.14083200 | -1.32732100 | -2.74535700 |
| H | -2.41137400 | -1.31795700 | -0.73748100 |
| C | -4.01072500 | -0.76557300 | -3.67801200 |
| H | -5.53674400 | 0.72749500  | -3.99321200 |
| H | -2.48621600 | -2.14602000 | -3.03244800 |
| H | -4.04066400 | -1.13815100 | -4.69833800 |
| C | -2.93132400 | 3.04017800  | -0.30119900 |
| C | -2.12224700 | 3.98214300  | 0.20343600  |
| H | -2.19155100 | 4.21930000  | 1.26755700  |
| H | -5.53045300 | -1.36088500 | 3.32887700  |
| H | -5.45962400 | -1.80392600 | 0.30071600  |
| H | -2.87360100 | 2.81241400  | -1.36627600 |
| C | -5.74350400 | -3.40400600 | 2.51371400  |
| H | -5.76123100 | -3.89012300 | 1.53267100  |
| H | -4.93377100 | -3.85561200 | 3.10215600  |
| H | -6.68151600 | -3.64636900 | 3.03157900  |
| C | -1.13247800 | 4.78937600  | -0.58949700 |
| H | -0.11734100 | 4.70719100  | -0.17709100 |
| H | -1.10301000 | 4.47626400  | -1.63841200 |
| H | -1.38759100 | 5.85723800  | -0.56273800 |

AT-4-1

0 imaginary frequencies

H = -2074.544259

G = -2074.651909

E(M06-2X-DCM) = -2074.936929

|   |             |             |            |
|---|-------------|-------------|------------|
| C | -3.91318600 | -0.09747300 | 0.08051900 |
| C | -5.17538600 | -0.62133700 | 0.86397400 |

|   |             |             |             |
|---|-------------|-------------|-------------|
| H | -6.00046200 | -0.69643400 | 0.14591000  |
| H | -4.95123100 | -1.64820500 | 1.18432200  |
| C | -5.62416800 | 0.18783700  | 2.05342200  |
| C | -2.74287800 | -0.03856200 | 1.09591300  |
| H | -2.59944400 | -0.99987400 | 1.59257000  |
| H | -2.99995000 | 0.68508200  | 1.87997600  |
| N | -1.46532200 | 0.33782700  | 0.50427000  |
| C | -0.25247100 | -0.15507000 | 0.85407900  |
| N | 0.77509700  | 0.49498800  | 0.18696600  |
| C | 2.16550600  | 0.27759200  | 0.21131300  |
| C | 2.74961300  | -0.99068000 | 0.33543800  |
| C | 2.99118600  | 1.39489700  | 0.02829600  |
| C | 4.13805000  | -1.11368500 | 0.29963800  |
| C | 4.37617600  | 1.25108800  | -0.02471900 |
| H | 2.55278400  | 2.38473300  | -0.05992000 |
| C | 4.96423400  | -0.00409400 | 0.11915500  |
| H | 6.04103800  | -0.11611600 | 0.08705000  |
| C | 5.23512900  | 2.45781700  | -0.29590400 |
| C | 4.75962400  | -2.47290700 | 0.50165700  |
| F | 5.40535500  | 2.65688300  | -1.62403700 |
| F | 6.46440800  | 2.33234900  | 0.24513900  |
| F | 4.68268500  | 3.58864900  | 0.19989800  |
| F | 5.94587100  | -2.57729900 | -0.13907000 |
| F | 3.96316200  | -3.46286200 | 0.04622100  |
| F | 4.99496400  | -2.72088900 | 1.80876900  |
| S | -0.03161800 | -1.39289700 | 1.97129000  |
| C | -4.23483900 | 1.33808000  | -0.45057100 |
| H | -4.37320100 | 1.99700000  | 0.41412200  |
| H | -5.21461400 | 1.30391500  | -0.94744900 |
| H | 2.12658300  | -1.86424600 | 0.45927800  |
| C | -6.76910600 | 0.87580200  | 2.11672700  |
| H | 0.51483000  | 1.36474400  | -0.26330300 |
| H | -1.51648300 | 1.07744900  | -0.18984700 |
| C | -3.66076800 | -1.09858800 | -1.06171800 |
| C | -4.45334800 | -1.06476300 | -2.22234100 |
| C | -2.70786800 | -2.12444300 | -0.95938300 |
| C | -4.29438600 | -2.00271000 | -3.24245500 |
| H | -5.21509200 | -0.29919800 | -2.33960900 |
| C | -2.54728800 | -3.06557900 | -1.97893300 |
| H | -2.07341300 | -2.20658900 | -0.08315200 |
| C | -3.33596100 | -3.00978100 | -3.12688600 |
| H | -4.92394500 | -1.94478300 | -4.12674300 |
| H | -1.79766600 | -3.84468300 | -1.86815600 |
| H | -3.20800400 | -3.74161300 | -3.91986800 |

|   |             |            |             |
|---|-------------|------------|-------------|
| C | -3.24616300 | 1.95680900 | -1.40767700 |
| C | -2.65112800 | 3.14513200 | -1.23347100 |
| H | -2.86351100 | 3.71016700 | -0.32313900 |
| H | -7.43083200 | 0.87260100 | 1.24786200  |
| H | -4.97717600 | 0.17790500 | 2.93196000  |
| H | -3.04467100 | 1.39876900 | -2.32318400 |
| C | -7.24796800 | 1.65744200 | 3.30625300  |
| H | -7.40683700 | 2.71405600 | 3.05124200  |
| H | -8.21170300 | 1.27593000 | 3.66970100  |
| H | -6.53212200 | 1.61169800 | 4.13386800  |
| C | -1.72581800 | 3.80396700 | -2.21827700 |
| H | -1.54327400 | 3.16744900 | -3.09059800 |
| H | -2.14614500 | 4.75355700 | -2.57572700 |
| H | -0.75672600 | 4.05111000 | -1.76302100 |

AT-4-2

0 imaginary frequencies

H = -2074.544173

G = -2074.652075

E(M06-2X-DCM) = -2074.936832

|   |             |             |             |
|---|-------------|-------------|-------------|
| C | 3.91449900  | 0.09515700  | 0.08503600  |
| C | 5.17471200  | 0.60790300  | 0.87894100  |
| H | 6.00266900  | 0.68926500  | 0.16487900  |
| H | 4.95130000  | 1.63163000  | 1.20969100  |
| C | 5.61739800  | -0.21507400 | 2.06119000  |
| C | 2.74031400  | 0.02685700  | 1.09537800  |
| H | 2.59708100  | 0.98262000  | 1.60268400  |
| H | 2.99293000  | -0.70639000 | 1.87193800  |
| N | 1.46427700  | -0.33979700 | 0.49452200  |
| C | 0.25095500  | 0.15091900  | 0.84629400  |
| N | -0.77508700 | -0.48838100 | 0.16699300  |
| C | -2.16570400 | -0.27206000 | 0.18771600  |
| C | -2.75322000 | 0.99138900  | 0.34133600  |
| C | -2.98788600 | -1.38419300 | -0.03871700 |
| C | -4.14122300 | 1.11440300  | 0.28790700  |
| C | -4.37205300 | -1.24050000 | -0.10542100 |
| H | -2.54608000 | -2.36806600 | -0.16777100 |
| C | -4.96357400 | 0.01005200  | 0.06424700  |
| H | -6.03894900 | 0.12468200  | 0.00481100  |
| C | -5.23427700 | -2.46023000 | -0.29800700 |
| C | -4.76603800 | 2.46935300  | 0.50867500  |
| F | -4.60350400 | -3.40868100 | -1.02892200 |
| F | -6.39031900 | -2.16291700 | -0.92756600 |
| F | -5.56198800 | -3.03077000 | 0.88339300  |

|   |             |             |             |
|---|-------------|-------------|-------------|
| F | -3.96433300 | 3.46861000  | 0.08367900  |
| F | -5.01815900 | 2.69094900  | 1.81740900  |
| F | -5.94388300 | 2.58631200  | -0.14509000 |
| S | 0.02925000  | 1.37454800  | 1.97897900  |
| C | 4.23558600  | -1.33486300 | -0.46108600 |
| H | 4.36994900  | -2.00363200 | 0.39664600  |
| H | 5.21706800  | -1.29680000 | -0.95430200 |
| H | -2.13279300 | 1.86201400  | 0.49517500  |
| C | 6.76076700  | -0.90592100 | 2.12136100  |
| H | -0.51304100 | -1.34992700 | -0.29782000 |
| H | 1.51669100  | -1.07184400 | -0.20748000 |
| C | 3.66797400  | 1.10965000  | -1.04664000 |
| C | 4.46404500  | 1.08712000  | -2.20514300 |
| C | 2.71713000  | 2.13651700  | -0.93562900 |
| C | 4.31038600  | 2.03692300  | -3.21505600 |
| H | 5.22440000  | 0.32117600  | -2.32875500 |
| C | 2.56183300  | 3.08949000  | -1.94494700 |
| H | 2.08016800  | 2.21024800  | -0.06046700 |
| C | 3.35391800  | 3.04484400  | -3.09104200 |
| H | 4.94255300  | 1.98754800  | -4.09800200 |
| H | 1.81364500  | 3.86901500  | -1.82764500 |
| H | 3.23008800  | 3.78588800  | -3.87608600 |
| C | 3.24903600  | -1.94116300 | -1.42829500 |
| C | 2.65093200  | -3.13005100 | -1.26906200 |
| H | 2.85897400  | -3.70537100 | -0.36419200 |
| H | 7.42580600  | -0.89457600 | 1.25509600  |
| H | 4.96706800  | -0.21339600 | 2.93731500  |
| H | 3.05181500  | -1.37279300 | -2.33836100 |
| C | 7.23360200  | -1.70131800 | 3.30415600  |
| H | 8.19666800  | -1.32563000 | 3.67536100  |
| H | 6.51469400  | -1.66313500 | 4.12949600  |
| H | 7.39143400  | -2.75542000 | 3.03833300  |
| C | 1.72759600  | -3.77613600 | -2.26411100 |
| H | 0.75647700  | -4.02626400 | -1.81484600 |
| H | 1.54930300  | -3.12970500 | -3.13000700 |
| H | 2.14718800  | -4.72261100 | -2.63057400 |

AT-4-3

0 imaginary frequencies

H = -2074.544175

G = -2074.652066

E(M06-2X-DCM) = -2074.936830

|   |            |             |             |
|---|------------|-------------|-------------|
| C | 3.91438000 | -0.09531400 | -0.08507900 |
| C | 5.17477500 | -0.60803800 | -0.87877600 |

|   |             |             |             |
|---|-------------|-------------|-------------|
| H | 6.00258900  | -0.68939200 | -0.16455000 |
| H | 4.95142500  | -1.63176200 | -1.20957100 |
| C | 5.61768500  | 0.21499200  | -2.06090000 |
| C | 2.74038900  | -0.02718900 | -1.09564000 |
| H | 2.59711200  | -0.98309100 | -1.60268100 |
| H | 2.99324400  | 0.70578900  | -1.87237000 |
| N | 1.46426800  | 0.33984100  | -0.49513600 |
| C | 0.25095200  | -0.15081100 | -0.84699900 |
| N | -0.77513000 | 0.48878700  | -0.16807600 |
| C | -2.16571200 | 0.27226200  | -0.18839000 |
| C | -2.75314700 | -0.99129100 | -0.34175800 |
| C | -2.98797100 | 1.38428900  | 0.03816300  |
| C | -4.14109100 | -1.11445700 | -0.28790700 |
| C | -4.37213200 | 1.24043900  | 0.10527000  |
| H | -2.54624500 | 2.36823300  | 0.16704000  |
| C | -4.96354300 | -0.01016800 | -0.06410800 |
| H | -6.03888600 | -0.12492200 | -0.00437300 |
| C | -5.23412900 | 2.46029600  | 0.29805600  |
| C | -4.76598500 | -2.46941600 | -0.50838600 |
| F | -5.55808000 | 3.03362900  | -0.88304200 |
| F | -4.60463800 | 3.40674900  | 1.03270100  |
| F | -6.39208700 | 2.16252100  | 0.92379900  |
| F | -5.94253200 | -2.58704600 | 0.14762300  |
| F | -3.96326500 | -3.46880200 | -0.08568400 |
| F | -5.02069500 | -2.69011200 | -1.81678700 |
| S | 0.02928600  | -1.37458000 | -1.97956700 |
| C | 4.23529900  | 1.33476000  | 0.46101700  |
| H | 4.36950600  | 2.00357600  | -0.39670500 |
| H | 5.21683400  | 1.29680900  | 0.95413500  |
| H | -2.13267000 | -1.86184700 | -0.49577300 |
| C | 6.76107500  | 0.90584100  | -2.12077200 |
| H | -0.51305900 | 1.35033900  | 0.29671000  |
| H | 1.51669500  | 1.07167400  | 0.20708600  |
| C | 3.66777300  | -1.10969700 | 1.04666800  |
| C | 4.46402800  | -1.08732600 | 2.20503900  |
| C | 2.71658800  | -2.13629100 | 0.93587300  |
| C | 4.31024800  | -2.03703300 | 3.21503500  |
| H | 5.22462400  | -0.32159200 | 2.32849700  |
| C | 2.56117600  | -3.08916100 | 1.94526300  |
| H | 2.07947600  | -2.20985300 | 0.06080700  |
| C | 3.35347000  | -3.04468200 | 3.09123000  |
| H | 4.94257000  | -1.98777600 | 4.09787800  |
| H | 1.81275000  | -3.86848600 | 1.82813400  |
| H | 3.22955500  | -3.78565800 | 3.87632600  |

|   |            |            |             |
|---|------------|------------|-------------|
| C | 3.24877000 | 1.94092500 | 1.42834100  |
| C | 2.65077500 | 3.12989800 | 1.26932300  |
| H | 2.85885700 | 3.70536200 | 0.36455200  |
| H | 7.42593200 | 0.89441900 | -1.25436700 |
| H | 4.96755600 | 0.21337900 | -2.93717400 |
| H | 3.05149200 | 1.37242500 | 2.33831300  |
| C | 7.23417800 | 1.70135800 | -3.30338300 |
| H | 8.19740200 | 1.32580900 | -3.67431900 |
| H | 6.51552600 | 1.66315500 | -4.12894700 |
| H | 7.39180400 | 2.75546200 | -3.03743800 |
| C | 1.72752200 | 3.77590700 | 2.26450700  |
| H | 1.54919400 | 3.12935200 | 3.13030600  |
| H | 2.14721400 | 4.72228300 | 2.63111400  |
| H | 0.75641100 | 4.02619000 | 1.81531100  |

AT-5

0 imaginary frequencies

H = -2074.531282

G = -2074.637582

E(M06-2X-DCM) = -2074.934353

|   |             |             |             |
|---|-------------|-------------|-------------|
| C | 3.65053100  | 0.47442500  | -0.48209300 |
| C | 3.63916700  | 0.26376800  | -2.04309600 |
| H | 2.77563100  | 0.80122500  | -2.46416000 |
| H | 4.51285600  | 0.78285800  | -2.44847800 |
| C | 3.62666600  | -1.17021800 | -2.55695600 |
| C | 2.47927600  | -0.28324000 | 0.18062500  |
| H | 2.49989800  | -0.13904800 | 1.26231700  |
| H | 2.57712000  | -1.36084300 | 0.00358000  |
| N | 1.17754900  | 0.17402500  | -0.29804100 |
| C | -0.00691300 | -0.21115800 | 0.25517600  |
| N | -1.08556300 | 0.35916400  | -0.40909500 |
| C | -2.46612600 | 0.16757300  | -0.20610800 |
| C | -3.02513100 | -1.07935700 | 0.10524600  |
| C | -3.31019500 | 1.26709700  | -0.40282200 |
| C | -4.40754200 | -1.19861900 | 0.23586100  |
| C | -4.69233600 | 1.12600700  | -0.28718300 |
| H | -2.88929000 | 2.24113100  | -0.63498100 |
| C | -5.25374800 | -0.10594700 | 0.04127900  |
| H | -6.32690900 | -0.21443600 | 0.13968800  |
| C | -5.58226500 | 2.30617500  | -0.57676200 |
| C | -4.99696400 | -2.52792800 | 0.63653700  |
| F | -4.98728700 | 3.47483900  | -0.24666400 |
| F | -6.74756400 | 2.23490500  | 0.09840000  |
| F | -5.88986900 | 2.38245200  | -1.89266700 |

|   |             |             |             |
|---|-------------|-------------|-------------|
| F | -5.09886900 | -2.63996900 | 1.97873400  |
| F | -4.24279800 | -3.56165400 | 0.20668500  |
| F | -6.24002300 | -2.69224300 | 0.13111800  |
| S | -0.11288400 | -1.20955500 | 1.59304900  |
| C | 3.52250900  | 2.02143300  | -0.22795000 |
| H | 2.62924000  | 2.37843600  | -0.75757100 |
| H | 4.37253700  | 2.50436100  | -0.72073800 |
| H | -2.38887000 | -1.94168700 | 0.24289900  |
| C | 4.75721500  | -1.86817800 | -2.71039300 |
| H | -0.86703000 | 1.20186100  | -0.92814500 |
| H | 4.74483700  | -2.88933900 | -3.08359500 |
| H | 1.14688900  | 0.54474400  | -1.23933600 |
| C | 4.98989300  | -0.03703800 | 0.08802900  |
| C | 6.19830600  | 0.50843900  | -0.38159200 |
| C | 5.07648300  | -1.03188300 | 1.07116600  |
| C | 7.43267300  | 0.08179000  | 0.10406900  |
| H | 6.18519600  | 1.28545700  | -1.14126000 |
| C | 6.31198500  | -1.46431500 | 1.56195000  |
| H | 4.18261900  | -1.49166100 | 1.47651000  |
| C | 7.49663100  | -0.91217200 | 1.08267300  |
| H | 8.34489700  | 0.52815600  | -0.28335600 |
| H | 6.33889800  | -2.23820700 | 2.32444200  |
| H | 8.45671600  | -1.24838100 | 1.46436000  |
| C | 3.45374600  | 2.49214400  | 1.21916300  |
| C | 4.56275500  | 2.73365400  | 1.92710900  |
| H | 5.55635900  | 2.58619700  | 1.51448300  |
| H | 5.73001000  | -1.45432700 | -2.46274600 |
| H | 4.51209500  | 3.08053400  | 2.95638000  |
| C | 2.28843500  | -1.76027300 | -2.94128800 |
| H | 1.79964100  | -1.15077400 | -3.71520800 |
| H | 2.39987200  | -2.77393200 | -3.33746800 |
| H | 1.59368600  | -1.81046800 | -2.09347400 |
| C | 2.08427900  | 2.73841500  | 1.81081800  |
| H | 1.52144400  | 3.46088000  | 1.20261800  |
| H | 1.47608500  | 1.82743400  | 1.85805500  |
| H | 2.15951500  | 3.14184500  | 2.82516600  |

AT-5-1

0 imaginary frequencies

H = -2074.534410

G = -2074.639542

E(M06-2X-DCM) = -2074.933667

|   |            |            |             |
|---|------------|------------|-------------|
| C | 3.54221800 | 0.54127900 | 0.07841900  |
| C | 3.47591000 | 1.95233800 | -0.61702700 |

|   |              |              |              |
|---|--------------|--------------|--------------|
| H | 2. 62784000  | 2. 49365000  | -0. 18066100 |
| H | 4. 37102500  | 2. 51236700  | -0. 32022400 |
| C | 3. 34993300  | 2. 01165900  | -2. 12890300 |
| C | 2. 44097400  | -0. 37736900 | -0. 52354300 |
| H | 2. 34742500  | -1. 30947100 | 0. 03196400  |
| H | 2. 70081500  | -0. 63373300 | -1. 55780000 |
| N | 1. 12092100  | 0. 24485900  | -0. 53374800 |
| C | -0. 04511700 | -0. 36753800 | -0. 17093900 |
| N | -1. 12934900 | 0. 46824200  | -0. 39803000 |
| C | -2. 50689800 | 0. 22793700  | -0. 22556500 |
| C | -3. 11354900 | -0. 99692600 | -0. 53486700 |
| C | -3. 30222100 | 1. 29792000  | 0. 20188300  |
| C | -4. 49262900 | -1. 13631200 | -0. 38911700 |
| C | -4. 68283600 | 1. 14722000  | 0. 32387700  |
| H | -2. 84327500 | 2. 24958300  | 0. 45362400  |
| C | -5. 29013400 | -0. 07349600 | 0. 03774700  |
| H | -6. 36164000 | -0. 19395400 | 0. 14048400  |
| C | -5. 52444300 | 2. 33377600  | 0. 71408900  |
| C | -5. 12963200 | -2. 47636600 | -0. 65983000 |
| F | -6. 65646500 | 1. 96138800  | 1. 34572900  |
| F | -5. 89390200 | 3. 05592700  | -0. 36948600 |
| F | -4. 85465400 | 3. 17505500  | 1. 53398500  |
| F | -6. 40200800 | -2. 34208800 | -1. 09661800 |
| F | -5. 17372700 | -3. 23806000 | 0. 45487500  |
| F | -4. 45051200 | -3. 17585900 | -1. 59342300 |
| S | -0. 15434600 | -1. 89979500 | 0. 49611100  |
| C | 3. 25457700  | 0. 82312700  | 1. 60234800  |
| H | 2. 16487100  | 0. 93926200  | 1. 69582900  |
| H | 3. 68432100  | 1. 80119400  | 1. 84740400  |
| H | -2. 51606400 | -1. 82642900 | -0. 88439700 |
| C | 2. 29199300  | 2. 60994300  | -2. 69675900 |
| H | -0. 89760900 | 1. 45182900  | -0. 47648800 |
| H | 2. 19236000  | 2. 69966600  | -3. 77541100 |
| H | 1. 03793700  | 1. 00313800  | -1. 20374500 |
| C | 4. 93501000  | -0. 09205300 | -0. 09663900 |
| C | 6. 07620500  | 0. 61406700  | 0. 32240600  |
| C | 5. 13482100  | -1. 37366300 | -0. 63304300 |
| C | 7. 35567700  | 0. 07883200  | 0. 19175400  |
| H | 5. 96869300  | 1. 59719000  | 0. 77153400  |
| C | 6. 41679400  | -1. 91566500 | -0. 76572400 |
| H | 4. 29282100  | -1. 97492500 | -0. 95807500 |
| C | 7. 53455500  | -1. 19139200 | -0. 35924500 |
| H | 8. 21432400  | 0. 65467800  | 0. 52711500  |
| H | 6. 53327300  | -2. 91006900 | -1. 18857800 |



|   |            |             |             |
|---|------------|-------------|-------------|
| H | 8.53127300 | -1.61118300 | -0.46319900 |
| C | 3.74073600 | -0.16426700 | 2.64740700  |
| C | 4.56874100 | 0.24509400  | 3.61562200  |
| H | 4.94509300 | 1.26447200  | 3.66027500  |
| H | 1.50754400 | 3.07680300  | -2.10220500 |
| H | 4.89967500 | -0.42609500 | 4.40427900  |
| C | 4.47310800 | 1.45705500  | -2.97134400 |
| H | 4.29469900 | 1.63588700  | -4.03599200 |
| H | 5.42688900 | 1.92612800  | -2.69734800 |
| H | 4.61224900 | 0.38149400  | -2.81920200 |
| C | 3.22761600 | -1.58276300 | 2.61185600  |
| H | 3.51971100 | -2.12744400 | 3.51506900  |
| H | 2.13496000 | -1.61811400 | 2.52299500  |
| H | 3.63226300 | -2.13282900 | 1.75268500  |

AT-5-2

0 imaginary frequencies

H = -2074.533739

G = -2074.640430

E(M06-2X-DCM) = -2074.933959

|   |             |             |             |
|---|-------------|-------------|-------------|
| C | 3.77253700  | 0.55831700  | 0.09438400  |
| C | 3.84347700  | 2.05467500  | -0.41797300 |
| H | 4.63742400  | 2.54826000  | 0.15197600  |
| H | 4.19363600  | 2.01518000  | -1.45588100 |
| C | 2.59979900  | 2.93424100  | -0.37111000 |
| C | 2.58641100  | -0.21096900 | -0.53259600 |
| H | 2.64904200  | -1.26977300 | -0.26824600 |
| H | 2.63083000  | -0.15241000 | -1.62746500 |
| N | 1.28982600  | 0.27576900  | -0.07951700 |
| C | 0.11290500  | -0.32635500 | -0.38223200 |
| N | -0.97142100 | 0.37244500  | 0.12869800  |
| C | -2.35273100 | 0.11519200  | 0.05308500  |
| C | -2.90582100 | -1.17250100 | 0.01207300  |
| C | -3.20911700 | 1.22433900  | 0.09874700  |
| C | -4.29222500 | -1.32364200 | -0.00360500 |
| C | -4.59147000 | 1.05363900  | 0.09814600  |
| H | -2.79550200 | 2.22798400  | 0.13976200  |
| C | -5.14787400 | -0.22309200 | 0.04018800  |
| H | -6.22251800 | -0.35791600 | 0.04789200  |
| C | -5.48655300 | 2.26485400  | 0.09429200  |
| C | -4.87664400 | -2.71071500 | -0.10363500 |
| F | -6.67378000 | 2.01316200  | 0.68416700  |
| F | -5.75054600 | 2.68536800  | -1.16372800 |
| F | -4.92032200 | 3.30802600  | 0.74452400  |

|   |             |             |             |
|---|-------------|-------------|-------------|
| F | -4.08420100 | -3.63451200 | 0.47881400  |
| F | -5.04434900 | -3.08478900 | -1.39127300 |
| F | -6.09004400 | -2.78281400 | 0.48885500  |
| S | 0.02269100  | -1.73547200 | -1.28903600 |
| C | 3.65565500  | 0.54933800  | 1.65792300  |
| H | 2.81631500  | 1.19207400  | 1.94262000  |
| H | 4.55145500  | 1.03894600  | 2.06182400  |
| H | -2.26054700 | -2.03850700 | -0.00330100 |
| C | 2.23230200  | 3.60201600  | 0.73341500  |
| H | -0.76077400 | 1.29965500  | 0.47958500  |
| H | 1.36451100  | 4.25811100  | 0.73941700  |
| H | 1.28204300  | 1.16424000  | 0.40760800  |
| C | 5.10181400  | -0.08758400 | -0.36153500 |
| C | 5.16417100  | -1.15064100 | -1.27609800 |
| C | 6.32223200  | 0.42181400  | 0.11696900  |
| C | 6.38919000  | -1.68693200 | -1.68319100 |
| H | 4.25992500  | -1.58693300 | -1.68454400 |
| C | 7.54533300  | -0.10921500 | -0.28765600 |
| H | 6.32774100  | 1.24710200  | 0.82319800  |
| C | 7.58623200  | -1.17143500 | -1.19200900 |
| H | 6.39848600  | -2.51304200 | -2.38921600 |
| H | 8.46762800  | 0.30892900  | 0.10711600  |
| H | 8.53784900  | -1.58937300 | -1.50842500 |
| C | 3.47673500  | -0.79550300 | 2.34465400  |
| C | 2.29957600  | -1.13134800 | 2.88519900  |
| H | 1.42998000  | -0.48225700 | 2.82450600  |
| H | 2.80513000  | 3.55293500  | 1.65579500  |
| H | 2.15910000  | -2.07651200 | 3.40346000  |
| C | 1.84232100  | 3.08941900  | -1.67001700 |
| H | 1.53872100  | 2.12078600  | -2.08510800 |
| H | 0.94813500  | 3.70963600  | -1.55063700 |
| H | 2.48305800  | 3.56549300  | -2.42432900 |
| C | 4.67390700  | -1.71028900 | 2.46024200  |
| H | 5.52932300  | -1.18573100 | 2.90649800  |
| H | 4.44249800  | -2.57881200 | 3.08454100  |
| H | 5.01081000  | -2.07369700 | 1.48348800  |

AT-5-3

0 imaginary frequencies

H = -2074.534264

G = -2074.640235

E(M06-2X-DCM) = -2074.933297

|   |            |            |             |
|---|------------|------------|-------------|
| C | 3.48528700 | 0.15612500 | 0.03324500  |
| C | 3.45912300 | 1.56159500 | -0.65286700 |

|   |             |             |             |
|---|-------------|-------------|-------------|
| H | 2.57111600  | 2.08804200  | -0.28764300 |
| H | 4.31538500  | 2.14688800  | -0.30032700 |
| C | 3.43546900  | 1.60909000  | -2.17288600 |
| C | 2.41039900  | -0.75581500 | -0.63509100 |
| H | 2.25283500  | -1.66124600 | -0.04843500 |
| H | 2.74910000  | -1.05412600 | -1.63406900 |
| N | 1.10374900  | -0.12599300 | -0.77423400 |
| C | -0.06598700 | -0.59304600 | -0.25087300 |
| N | -1.13826700 | 0.19066100  | -0.65105500 |
| C | -2.51359400 | 0.05716400  | -0.37539100 |
| C | -3.16701000 | -1.18094200 | -0.30735200 |
| C | -3.26215400 | 1.23395100  | -0.25013100 |
| C | -4.54410100 | -1.21950300 | -0.09456300 |
| C | -4.64103200 | 1.17770700  | -0.05387100 |
| H | -2.76953100 | 2.20022100  | -0.30985200 |
| C | -5.29439100 | -0.04982700 | 0.03281100  |
| H | -6.36687700 | -0.09479800 | 0.17738500  |
| C | -5.41394400 | 2.45758700  | 0.12897800  |
| C | -5.23172200 | -2.55610200 | 0.03164300  |
| F | -6.69790300 | 2.32900300  | -0.26527300 |
| F | -4.86911500 | 3.47494900  | -0.57769300 |
| F | -5.43321400 | 2.84702500  | 1.42363400  |
| F | -6.51264600 | -2.49774000 | -0.39710000 |
| F | -5.26439400 | -2.97634700 | 1.31509600  |
| F | -4.60598200 | -3.51349800 | -0.68489700 |
| S | -0.18489500 | -1.91459400 | 0.77350300  |
| C | 3.07002900  | 0.29149300  | 1.54846000  |
| H | 3.12313600  | -0.71632400 | 1.97317500  |
| H | 2.01002600  | 0.57591700  | 1.56399800  |
| H | -2.60727700 | -2.09729900 | -0.42531500 |
| C | 2.43291800  | 2.23103600  | -2.81221800 |
| H | -0.88945300 | 1.10449800  | -1.01203000 |
| H | 2.40764900  | 2.31595200  | -3.89564600 |
| H | 1.04492700  | 0.53687200  | -1.54059300 |
| C | 4.86601200  | -0.52521700 | -0.05607700 |
| C | 4.99447800  | -1.91213400 | -0.24830200 |
| C | 6.05419600  | 0.20584900  | 0.11884000  |
| C | 6.24487900  | -2.53314800 | -0.28696800 |
| H | 4.11690700  | -2.53684500 | -0.37036900 |
| C | 7.30507100  | -0.41011200 | 0.08106200  |
| H | 6.01551900  | 1.27331700  | 0.30162300  |
| C | 7.40953500  | -1.78523800 | -0.12692300 |
| H | 6.30110700  | -3.60734500 | -0.44257100 |
| H | 8.19999100  | 0.19124200  | 0.21892600  |

|   |            |             |             |
|---|------------|-------------|-------------|
| H | 8.38332500 | -2.26619200 | -0.15899700 |
| C | 3.84477400 | 1.24107500  | 2.44677700  |
| C | 4.87278300 | 0.80810200  | 3.18626600  |
| H | 5.21062100 | -0.22386300 | 3.15040000  |
| H | 1.62597000 | 2.72438200  | -2.27186700 |
| H | 5.41320800 | 1.47217300  | 3.85695700  |
| C | 4.58749400 | 1.01013100  | -2.94335900 |
| H | 4.46528100 | 1.16645900  | -4.01949400 |
| H | 5.53776100 | 1.46374400  | -2.63468900 |
| H | 4.69398200 | -0.06435100 | -2.75885600 |
| C | 3.35860300 | 2.66938600  | 2.55602600  |
| H | 3.94600200 | 3.23432300  | 3.28662400  |
| H | 3.40850400 | 3.20602700  | 1.60089700  |
| H | 2.30734700 | 2.69739100  | 2.87441900  |

AT-5-4

0 imaginary frequencies

H = -2074.531320

G = -2074.637757

E(M06-2X-DCM) = -2074.930032

|   |             |             |             |
|---|-------------|-------------|-------------|
| C | 3.57309400  | 0.20445500  | -0.36011000 |
| C | 4.04188600  | 1.31856000  | -1.36110800 |
| H | 4.61122700  | 2.05959200  | -0.79065700 |
| H | 4.74373900  | 0.85234000  | -2.06065800 |
| C | 2.99875100  | 2.04181600  | -2.21023200 |
| C | 2.50701600  | -0.71950400 | -1.03567700 |
| H | 2.37579600  | -1.64259700 | -0.47689300 |
| H | 2.86282600  | -1.00229700 | -2.03481300 |
| N | 1.17548300  | -0.13952500 | -1.14049300 |
| C | 0.04336700  | -0.64939900 | -0.58659200 |
| N | -1.02833400 | 0.21676500  | -0.73816600 |
| C | -2.38222100 | 0.06314400  | -0.38078000 |
| C | -3.06969700 | -1.15507700 | -0.47044000 |
| C | -3.07988500 | 1.21590600  | 0.00128700  |
| C | -4.42736800 | -1.20175300 | -0.15760800 |
| C | -4.44109700 | 1.15450300  | 0.29472500  |
| H | -2.56081000 | 2.16777700  | 0.06731100  |
| C | -5.12673200 | -0.05644900 | 0.22493200  |
| H | -6.18612000 | -0.10404600 | 0.44527200  |
| C | -5.15514500 | 2.39928200  | 0.75230700  |
| C | -5.14730200 | -2.52636700 | -0.20397200 |
| F | -4.63051600 | 3.51187300  | 0.18817500  |
| F | -5.06618000 | 2.56084300  | 2.09176100  |
| F | -6.46840900 | 2.36647800  | 0.44374400  |

|   |             |             |             |
|---|-------------|-------------|-------------|
| F | -4.61213200 | -3.35832200 | -1.12208800 |
| F | -6.45533200 | -2.37027900 | -0.50886200 |
| F | -5.09352300 | -3.16073000 | 0.98765900  |
| S | -0.04097800 | -2.13426200 | 0.19590500  |
| C | 2.94362000  | 0.84182800  | 0.93163900  |
| H | 2.44916500  | 0.03634300  | 1.48878300  |
| H | 2.14708700  | 1.52008600  | 0.60962900  |
| H | -2.55104600 | -2.04883600 | -0.78539400 |
| C | 2.27250700  | 3.08084700  | -1.77020000 |
| H | -0.78393000 | 1.17074400  | -0.97854200 |
| H | 1.57652200  | 3.60101700  | -2.42510200 |
| H | 1.12743500  | 0.77399600  | -1.57804400 |
| C | 4.77146500  | -0.69269200 | 0.03446000  |
| C | 4.55293400  | -1.89625400 | 0.73119000  |
| C | 6.10427400  | -0.33420600 | -0.21931800 |
| C | 5.61127300  | -2.70979500 | 1.13286800  |
| H | 3.54486200  | -2.20699300 | 0.98902400  |
| C | 7.16811000  | -1.14486300 | 0.18538100  |
| H | 6.33810600  | 0.59478500  | -0.72568400 |
| C | 6.92885900  | -2.34079600 | 0.85823200  |
| H | 5.40126400  | -3.63351200 | 1.66550800  |
| H | 8.18687300  | -0.83230600 | -0.02876600 |
| H | 7.75517800  | -2.97404100 | 1.16928300  |
| C | 3.87755900  | 1.59177800  | 1.87188400  |
| C | 4.06984700  | 2.91302100  | 1.76684900  |
| H | 3.58370000  | 3.51600100  | 1.00488800  |
| H | 2.37033000  | 3.47601700  | -0.76394500 |
| H | 4.71897800  | 3.44910800  | 2.45480300  |
| C | 2.87679100  | 1.57831100  | -3.64636700 |
| H | 3.83565200  | 1.70274200  | -4.16699200 |
| H | 2.62554300  | 0.51227300  | -3.71690900 |
| H | 2.11841900  | 2.14492400  | -4.19564100 |
| C | 4.52424600  | 0.81055700  | 2.99262100  |
| H | 5.10262100  | 1.46799200  | 3.64930200  |
| H | 3.75965200  | 0.30966400  | 3.60206000  |
| H | 5.19043400  | 0.02686400  | 2.61897800  |

AT-6

0 imaginary frequencies

H = -2153.108644

G = -2153.222908

E(M06-2X-DCM) = -2153.547427

|   |            |             |             |
|---|------------|-------------|-------------|
| C | 3.49690700 | 0.37287200  | -0.48413900 |
| C | 3.33139700 | -0.38783100 | -1.85456700 |

|   |             |             |             |
|---|-------------|-------------|-------------|
| H | 2.34431500  | -0.11112900 | -2.24265600 |
| H | 4.06885300  | 0.03260500  | -2.55207800 |
| C | 3.44512800  | -1.90553500 | -1.85729800 |
| C | 2.34857100  | -0.03075900 | 0.47591800  |
| H | 2.52705900  | 0.38744300  | 1.47490200  |
| H | 2.30158500  | -1.11473000 | 0.57655700  |
| N | 1.03709700  | 0.40995500  | 0.00878800  |
| C | -0.13436000 | -0.23288700 | 0.30005800  |
| N | -1.21767500 | 0.48227200  | -0.19496300 |
| C | -2.59865700 | 0.24174600  | -0.06838600 |
| C | -3.18456300 | -0.27579900 | 1.09535400  |
| C | -3.42090200 | 0.62322600  | -1.13603800 |
| C | -4.56924000 | -0.41925400 | 1.16208900  |
| C | -4.80527800 | 0.48659500  | -1.04698000 |
| H | -2.98110400 | 1.03371100  | -2.04047500 |
| C | -5.39282800 | -0.04184700 | 0.10043500  |
| H | -6.46889800 | -0.14072200 | 0.17394400  |
| C | -5.66140000 | 0.85671000  | -2.22976900 |
| C | -5.18727800 | -1.02646000 | 2.39667700  |
| F | -6.90245000 | 1.22996500  | -1.85373300 |
| F | -5.80127000 | -0.17944500 | -3.08703100 |
| F | -5.12354200 | 1.87858300  | -2.93524300 |
| F | -4.45277100 | -0.77811000 | 3.50161800  |
| F | -5.29851700 | -2.36828900 | 2.28586100  |
| F | -6.43110300 | -0.54462300 | 2.61761200  |
| S | -0.24489600 | -1.69879600 | 1.09911100  |
| C | 3.40611800  | 1.90417000  | -0.83459800 |
| H | 2.61419800  | 2.02489200  | -1.58405800 |
| H | 4.33238200  | 2.18967900  | -1.34766500 |
| H | -2.56670400 | -0.55587900 | 1.93610400  |
| C | 2.32317600  | -2.64394800 | -1.80056400 |
| H | -0.98622500 | 1.12989000  | -0.93950200 |
| H | 0.96385200  | 1.41700400  | -0.09673200 |
| C | 4.85878400  | 0.02409100  | 0.14894100  |
| C | 4.97983900  | -0.75350000 | 1.31176300  |
| C | 6.05110900  | 0.44138300  | -0.46952900 |
| C | 6.23119800  | -1.08634000 | 1.83851700  |
| H | 4.09877100  | -1.12170000 | 1.82464300  |
| C | 7.30086000  | 0.11232300  | 0.05174700  |
| H | 6.01315500  | 1.02238100  | -1.38644500 |
| C | 7.39916900  | -0.65351300 | 1.21475300  |
| H | 6.28487400  | -1.69014500 | 2.74063300  |
| H | 8.19966200  | 0.45293000  | -0.45587100 |
| H | 8.37186900  | -0.91140700 | 1.62440800  |

|   |            |             |             |
|---|------------|-------------|-------------|
| C | 3.15102200 | 2.89358000  | 0.29260800  |
| C | 2.05820500 | 3.67890300  | 0.23972400  |
| H | 1.40473200 | 3.56512700  | -0.63026900 |
| H | 1.37481200 | -2.10962000 | -1.73917000 |
| C | 4.83195200 | -2.49358900 | -1.99400100 |
| H | 4.80861400 | -3.56524400 | -2.20561700 |
| H | 5.37494500 | -2.00625000 | -2.81506100 |
| H | 5.43441400 | -2.34514100 | -1.09133100 |
| C | 4.19947300 | 2.98674900  | 1.37535900  |
| H | 4.00318500 | 3.79577700  | 2.08202700  |
| H | 4.28279100 | 2.05401600  | 1.94411500  |
| H | 5.18874800 | 3.15776100  | 0.93202000  |
| C | 1.61347400 | 4.74944000  | 1.19731400  |
| H | 2.26877200 | 4.85150000  | 2.06537300  |
| H | 1.56769900 | 5.72533800  | 0.69507700  |
| H | 0.60107600 | 4.54340300  | 1.56994900  |
| C | 2.17718800 | -4.13898700 | -1.79202900 |
| H | 1.56832300 | -4.47581600 | -2.64245000 |
| H | 3.13098700 | -4.67139500 | -1.82938800 |
| H | 1.64814900 | -4.46110500 | -0.88546800 |

AT-6-1

0 imaginary frequencies

H = -2153.107164

G = -2153.220733

E(M06-2X-DCM) = -2153.545669

|   |             |             |             |
|---|-------------|-------------|-------------|
| C | 3.34886900  | -0.39305700 | 0.28019000  |
| C | 3.13909300  | 0.34416600  | 1.65980200  |
| H | 2.05868900  | 0.31255900  | 1.86439200  |
| H | 3.61180500  | -0.27110400 | 2.43421300  |
| C | 3.64237500  | 1.76744800  | 1.82802500  |
| C | 2.21355500  | -0.02868500 | -0.71666000 |
| H | 2.41674700  | -0.49053500 | -1.69090000 |
| H | 2.14471200  | 1.04625400  | -0.87361200 |
| N | 0.89892300  | -0.47502400 | -0.26690400 |
| C | -0.26103500 | 0.23282500  | -0.40068800 |
| N | -1.34415800 | -0.51437900 | 0.04396700  |
| C | -2.71892400 | -0.20940600 | 0.02730200  |
| C | -3.49895300 | -0.67420300 | 1.09306400  |
| C | -3.34002700 | 0.46175100  | -1.03499300 |
| C | -4.87796200 | -0.46894900 | 1.10167600  |
| C | -4.71682300 | 0.67499500  | -1.00155700 |
| H | -2.75485900 | 0.81077800  | -1.87345300 |
| C | -5.49902100 | 0.21465000  | 0.05881000  |

|   |             |             |             |
|---|-------------|-------------|-------------|
| H | -6.56910900 | 0.38191100  | 0.06877700  |
| C | -5.36838500 | 1.45572100  | -2.11535800 |
| C | -5.70333900 | -1.04344000 | 2.22282000  |
| F | -5.40365000 | 2.77755700  | -1.83913500 |
| F | -6.64568000 | 1.06080800  | -2.31706800 |
| F | -4.70838800 | 1.31063000  | -3.28388800 |
| F | -6.82890800 | -0.33123900 | 2.43503100  |
| F | -5.01403500 | -1.07776800 | 3.38573600  |
| F | -6.08296200 | -2.31520300 | 1.95632100  |
| S | -0.36481300 | 1.80057400  | -0.97963100 |
| C | 3.26671400  | -1.92940600 | 0.62069100  |
| H | 2.45262100  | -2.05910800 | 1.34473200  |
| H | 4.18395700  | -2.19807400 | 1.15931000  |
| H | -3.02892800 | -1.18725700 | 1.92708300  |
| C | 4.58366300  | 2.01500100  | 2.75436700  |
| H | -1.10460100 | -1.26857400 | 0.67731300  |
| H | 0.80317700  | -1.48512000 | -0.23862300 |
| C | 4.72330600  | -0.02947700 | -0.31090800 |
| C | 4.87985000  | 0.65361400  | -1.52692900 |
| C | 5.89349900  | -0.35323600 | 0.39815600  |
| C | 6.14629000  | 0.97885800  | -2.02231400 |
| H | 4.01516600  | 0.94468800  | -2.11320800 |
| C | 7.15769800  | -0.03223800 | -0.09117100 |
| H | 5.82165500  | -0.85701100 | 1.35772300  |
| C | 7.29245600  | 0.63415700  | -1.31065700 |
| H | 6.22822900  | 1.50508800  | -2.96978200 |
| H | 8.03948200  | -0.30009400 | 0.48527300  |
| H | 8.27709800  | 0.88489900  | -1.69561600 |
| C | 3.06191600  | -2.92226700 | -0.51299200 |
| C | 1.97190200  | -3.71356600 | -0.50353000 |
| H | 1.28287700  | -3.60160600 | 0.33890300  |
| H | 4.96172600  | 1.16382500  | 3.32349500  |
| C | 3.01277300  | 2.83678100  | 0.96786900  |
| H | 3.38976900  | 2.79272900  | -0.06265400 |
| H | 1.92464300  | 2.71488500  | 0.90978800  |
| H | 3.21636300  | 3.84394100  | 1.33949400  |
| C | 4.15737000  | -3.01617200 | -1.54833700 |
| H | 4.25232400  | -2.09153400 | -2.12817700 |
| H | 5.12842000  | -3.16389900 | -1.05884100 |
| H | 4.00478500  | -3.83978000 | -2.24897700 |
| C | 1.57511400  | -4.79111000 | -1.47443200 |
| H | 0.57632900  | -4.59621300 | -1.88765100 |
| H | 2.26520200  | -4.88926300 | -2.31556700 |
| H | 1.51869500  | -5.76596500 | -0.97125600 |



|   |             |             |             |
|---|-------------|-------------|-------------|
| C | 5. 21627800 | 3. 32671900 | 3. 12418300 |
| H | 6. 29407500 | 3. 30941400 | 2. 90985900 |
| H | 4. 79004700 | 4. 17956000 | 2. 59004900 |
| H | 5. 11566100 | 3. 51934200 | 4. 20103800 |

AT-6-2

0 imaginary frequencies

H = -2153.107068

G = -2153.220747

E(M06-2X-DCM) = -2153.545601

|   |              |              |              |
|---|--------------|--------------|--------------|
| C | -3. 34820200 | 0. 38419700  | 0. 28804200  |
| C | -3. 13504700 | -0. 38510800 | 1. 64958600  |
| H | -2. 05418500 | -0. 35783400 | 1. 85235400  |
| H | -3. 60615900 | 0. 21162900  | 2. 43931500  |
| C | -3. 63746400 | -1. 81214800 | 1. 78558600  |
| C | -2. 21377700 | 0. 04502500  | -0. 71874900 |
| H | -2. 41946600 | 0. 52857200  | -1. 68186000 |
| H | -2. 14298000 | -1. 02591200 | -0. 90030800 |
| N | -0. 89930800 | 0. 48384100  | -0. 26117000 |
| C | 0. 26186600  | -0. 21890500 | -0. 41161500 |
| N | 1. 34393300  | 0. 52066000  | 0. 04728500  |
| C | 2. 72011200  | 0. 22314000  | 0. 02146100  |
| C | 3. 50250100  | 0. 69043000  | 1. 08448800  |
| C | 3. 34174900  | -0. 43448000 | -1. 04909400 |
| C | 4. 88365700  | 0. 50088300  | 1. 08285500  |
| C | 4. 72154600  | -0. 62923000 | -1. 02764500 |
| H | 2. 75543400  | -0. 78196500 | -1. 88733500 |
| C | 5. 50583400  | -0. 16644000 | 0. 03005400  |
| H | 6. 57976700  | -0. 30701400 | 0. 02379700  |
| C | 5. 37613800  | -1. 38458600 | -2. 15721000 |
| C | 5. 69444300  | 0. 96911600  | 2. 26287700  |
| F | 4. 70382600  | -1. 23612100 | -3. 31825500 |
| F | 5. 43571400  | -2. 70902300 | -1. 89800200 |
| F | 6. 64485700  | -0. 96585200 | -2. 36468300 |
| F | 6. 96633300  | 1. 25629200  | 1. 91554900  |
| F | 5. 75031300  | 0. 02937000  | 3. 23320900  |
| F | 5. 16322000  | 2. 08012500  | 2. 82389100  |
| S | 0. 36694900  | -1. 77417200 | -1. 02334200 |
| C | -3. 26788700 | 1. 91216100  | 0. 66445200  |
| H | -2. 45261300 | 2. 02620400  | 1. 38978900  |
| H | -4. 18456600 | 2. 16651700  | 1. 21092000  |
| H | 3. 03463000  | 1. 20896400  | 1. 91641400  |
| C | -4. 57579300 | -2. 08177500 | 2. 70878000  |
| H | 1. 10322000  | 1. 26313900  | 0. 69389600  |

|   |             |             |             |
|---|-------------|-------------|-------------|
| H | -0.80549000 | 1.49329100  | -0.21155500 |
| C | -4.72304600 | 0.03269400  | -0.30937900 |
| C | -4.88058900 | -0.62126200 | -1.54119100 |
| C | -5.89254000 | 0.33746500  | 0.40918800  |
| C | -6.14734400 | -0.93653900 | -2.04216900 |
| H | -4.01643600 | -0.89689100 | -2.13565900 |
| C | -7.15706100 | 0.02627600  | -0.08563300 |
| H | -5.81988700 | 0.81823100  | 1.38043500  |
| C | -7.29284500 | -0.61086500 | -1.32054300 |
| H | -6.23005800 | -1.44004200 | -3.00184100 |
| H | -8.03828400 | 0.27880500  | 0.49853500  |
| H | -8.27774200 | -0.85389700 | -1.70976700 |
| C | -3.06693500 | 2.93182200  | -0.44595100 |
| C | -1.97816700 | 3.72449700  | -0.41988900 |
| H | -1.28738700 | 3.59390100  | 0.41841100  |
| H | -4.95231400 | -1.24433600 | 3.29891500  |
| C | -3.01004100 | -2.86053400 | 0.89856600  |
| H | -1.92184400 | -2.73830400 | 0.84229800  |
| H | -3.21429200 | -3.87637200 | 1.24535500  |
| H | -3.38819500 | -2.79044500 | -0.13006700 |
| C | -4.16456900 | 3.04857700  | -1.47666200 |
| H | -4.25922900 | 2.13800300  | -2.07838000 |
| H | -5.13487900 | 3.18296800  | -0.98188700 |
| H | -4.01471900 | 3.88901200  | -2.15763800 |
| C | -1.58506000 | 4.82528900  | -1.36593300 |
| H | -0.58638600 | 4.64238100  | -1.78484800 |
| H | -2.27646400 | 4.94136000  | -2.20369800 |
| H | -1.53026700 | 5.78831900  | -0.84031200 |
| C | -5.20673100 | -3.40206400 | 3.04981300  |
| H | -5.10180000 | -3.62019000 | 4.12137900  |
| H | -6.28536800 | -3.37993600 | 2.84022500  |
| H | -4.78245400 | -4.24185800 | 2.49389800  |

AT-6-3

0 imaginary frequencies

H = -2153.107031

G = -2153.221216

E(M06-2X-DCM) = -2153.545836

|   |             |            |             |
|---|-------------|------------|-------------|
| C | -3.25985200 | 0.07241300 | 0.10116500  |
| C | -3.24155300 | 1.01351700 | -1.15079700 |
| H | -2.37970000 | 0.72051200 | -1.76013700 |
| H | -4.11467500 | 0.79177700 | -1.77291600 |
| C | -3.16207000 | 2.51834300 | -0.92466200 |
| C | -2.14975800 | 0.52833000 | 1.09791200  |

|   |             |             |             |
|---|-------------|-------------|-------------|
| H | -1.99428000 | -0.22021700 | 1.87482300  |
| H | -2.45326100 | 1.46430600  | 1.58190500  |
| N | -0.84950800 | 0.74633200  | 0.47952900  |
| C | 0.30430300  | 0.08952400  | 0.77506400  |
| N | 1.39476100  | 0.67428800  | 0.14792000  |
| C | 2.74921800  | 0.28771800  | 0.12811100  |
| C | 3.70662900  | 1.30716600  | 0.05304400  |
| C | 3.16887800  | -1.04929600 | 0.09550400  |
| C | 5.06220400  | 0.99905400  | -0.04789700 |
| C | 4.52971500  | -1.33968900 | 0.01058100  |
| H | 2.44142600  | -1.84713100 | 0.13067100  |
| C | 5.48759500  | -0.32768300 | -0.06312800 |
| H | 6.54004000  | -0.56867400 | -0.14927400 |
| C | 4.97637100  | -2.78025700 | 0.03031300  |
| C | 6.07369400  | 2.11473100  | -0.07538500 |
| F | 6.12754600  | -2.95266400 | -0.65776100 |
| F | 4.05204800  | -3.60118500 | -0.51118400 |
| F | 5.20231000  | -3.21114500 | 1.29061600  |
| F | 6.44840600  | 2.47856100  | 1.17175400  |
| F | 5.57889800  | 3.22288100  | -0.67433500 |
| F | 7.19444100  | 1.75962100  | -0.73775100 |
| S | 0.39704900  | -1.24912900 | 1.78356600  |
| C | -2.88469300 | -1.38927300 | -0.35524400 |
| H | -2.76928800 | -1.98823800 | 0.55585400  |
| H | -1.88712100 | -1.32983800 | -0.80516600 |
| H | 3.39452400  | 2.34745000  | 0.06982200  |
| C | -2.14013000 | 3.20567000  | -1.47255500 |
| H | 1.24386400  | 1.61479400  | -0.19806300 |
| H | -0.80485500 | 1.56368800  | -0.11989400 |
| C | -4.62265500 | 0.06524600  | 0.82383100  |
| C | -4.71880200 | -0.04511900 | 2.22190200  |
| C | -5.83071700 | 0.10575700  | 0.10435400  |
| C | -5.95571500 | -0.09488700 | 2.86936400  |
| H | -3.82572500 | -0.09837400 | 2.83421600  |
| C | -7.06772900 | 0.05387100  | 0.74617300  |
| H | -5.81619300 | 0.15847500  | -0.97852100 |
| C | -7.13922000 | -0.04187000 | 2.13630100  |
| H | -5.98636400 | -0.17739500 | 3.95268800  |
| H | -7.97832600 | 0.08694400  | 0.15338900  |
| H | -8.10209400 | -0.07883900 | 2.63835900  |
| C | -3.82330600 | -2.12072200 | -1.30612600 |
| C | -3.69094300 | -1.97584400 | -2.63582700 |
| H | -2.89796700 | -1.31510300 | -2.98982100 |
| H | -1.41643600 | 2.63400600  | -2.06056800 |

|   |             |             |             |
|---|-------------|-------------|-------------|
| C | -4.28985900 | 3.17147700  | -0.16162800 |
| H | -5.25232000 | 2.94597900  | -0.63788100 |
| H | -4.36623300 | 2.78809700  | 0.86181100  |
| H | -4.18833500 | 4.25748100  | -0.10888000 |
| C | -4.79944300 | -3.07078700 | -0.65020900 |
| H | -5.37377400 | -2.57521100 | 0.13918100  |
| H | -5.50791500 | -3.51363900 | -1.35432700 |
| H | -4.25073600 | -3.89367500 | -0.17020300 |
| C | -4.48142200 | -2.62673800 | -3.73685800 |
| H | -5.29818800 | -3.25362600 | -3.37050700 |
| H | -4.91513800 | -1.87091400 | -4.40608900 |
| H | -3.83314800 | -3.25701600 | -4.36155100 |
| C | -1.87473500 | 4.68655700  | -1.45215800 |
| H | -2.58197300 | 5.24516400  | -0.83477400 |
| H | -0.86587900 | 4.90093300  | -1.07403900 |
| H | -1.91837300 | 5.10213300  | -2.46822600 |

AT-7

0 imaginary frequencies

H = -2231.670987

G = -2231.790814

E(M06-2X-DCM) = -2232.156489

|   |             |             |             |
|---|-------------|-------------|-------------|
| C | -3.58038100 | -0.10327300 | -0.33514700 |
| C | -3.53400000 | 1.33862900  | 0.28982300  |
| H | -2.76997100 | 1.89699000  | -0.25038400 |
| H | -4.48406700 | 1.83177200  | 0.04399200  |
| C | -3.30742600 | 1.45880400  | 1.79133500  |
| C | -2.35904600 | -0.92262000 | 0.13965900  |
| H | -2.34976300 | -1.91104400 | -0.33679500 |
| H | -2.42225900 | -1.09395100 | 1.21745400  |
| N | -1.09146200 | -0.25300500 | -0.12102900 |
| C | 0.10781800  | -0.75498400 | 0.26772800  |
| N | 1.15343500  | 0.08158200  | -0.10816200 |
| C | 2.54446100  | -0.08883800 | 0.00511700  |
| C | 3.18251500  | -1.33397300 | -0.09141100 |
| C | 3.32370500  | 1.06722600  | 0.14801200  |
| C | 4.57328700  | -1.40008400 | -0.02720000 |
| C | 4.71372400  | 0.98319000  | 0.19995300  |
| H | 2.84424000  | 2.03929500  | 0.22020400  |
| C | 5.35306900  | -0.25215200 | 0.11937500  |
| H | 6.43307200  | -0.31957800 | 0.16660900  |
| C | 5.52094900  | 2.23551600  | 0.41956300  |
| C | 5.25522000  | -2.73356500 | -0.20435100 |
| F | 4.92760700  | 3.31655600  | -0.13804500 |

|   |             |             |             |
|---|-------------|-------------|-------------|
| F | 6.75919700  | 2.13368000  | -0.10731000 |
| F | 5.67134200  | 2.50778500  | 1.73562800  |
| F | 5.54486700  | -2.96730900 | -1.50653200 |
| F | 4.48718400  | -3.75640600 | 0.21951300  |
| F | 6.42371600  | -2.78892800 | 0.47237000  |
| S | 0.27021700  | -2.18487500 | 1.12688800  |
| C | -3.64249700 | 0.00873900  | -1.91833300 |
| H | -4.47862800 | 0.67251700  | -2.15403600 |
| H | -3.94593400 | -0.98103900 | -2.28026800 |
| H | 2.59815700  | -2.23564300 | -0.20380800 |
| C | -2.21344000 | 2.04393900  | 2.32940300  |
| H | 0.87839900  | 1.03811600  | -0.29857700 |
| H | -1.10238000 | 0.45674300  | -0.84652000 |
| C | -4.87852500 | -0.84920600 | 0.05566900  |
| C | -4.88500100 | -2.12388300 | 0.64349900  |
| C | -6.12752900 | -0.26965100 | -0.23091500 |
| C | -6.08185600 | -2.78091200 | 0.94300600  |
| H | -3.95701900 | -2.62872400 | 0.88652700  |
| C | -7.32327700 | -0.92131200 | 0.06504500  |
| H | -6.17756800 | 0.71290200  | -0.69136400 |
| C | -7.30774400 | -2.18489800 | 0.65745900  |
| H | -6.04638800 | -3.76517100 | 1.40254500  |
| H | -8.26856200 | -0.43815000 | -0.16839100 |
| H | -8.23773400 | -2.69583500 | 0.89096600  |
| C | -2.40634500 | 0.41744800  | -2.71889400 |
| C | -2.13025900 | 1.69186700  | -3.08859500 |
| C | -4.44695000 | 0.93645200  | 2.64816300  |
| H | -5.41077400 | 1.17468300  | 2.18462400  |
| H | -4.42553500 | -0.15510200 | 2.75479700  |
| H | -4.45351200 | 1.36733700  | 3.65074200  |
| C | -1.60373100 | -0.77549600 | -3.21319000 |
| H | -0.59832300 | -0.52772100 | -3.55834700 |
| H | -1.50525500 | -1.54517700 | -2.44151700 |
| H | -2.13009100 | -1.24695300 | -4.05552900 |
| C | -3.00470600 | 2.88620300  | -2.76985100 |
| H | -3.94101800 | 2.63453300  | -2.27165300 |
| H | -2.47492500 | 3.61021800  | -2.13501100 |
| H | -3.25093700 | 3.42019500  | -3.69817500 |
| C | -1.96383100 | 2.15021600  | 3.82037500  |
| H | -0.94319100 | 1.81725100  | 4.05181300  |
| H | -2.03120200 | 3.19498200  | 4.15748800  |
| H | -2.64237400 | 1.55389800  | 4.43064900  |
| C | -1.08600000 | 2.68970400  | 1.55139300  |
| H | -1.26660200 | 2.78050200  | 0.47836800  |

|   |             |            |             |
|---|-------------|------------|-------------|
| H | -0.90313600 | 3.70290600 | 1.93560800  |
| H | -0.14855800 | 2.13471600 | 1.69801300  |
| C | -0.94826600 | 2.08727900 | -3.95067600 |
| H | -1.28589200 | 2.35434400 | -4.96231800 |
| H | -0.46150800 | 2.98463300 | -3.54565300 |
| H | -0.18689500 | 1.31293000 | -4.05460900 |

AT-7-1

0 imaginary frequencies

H = -2231.670960

G = -2231.791877

E(M06-2X-DCM) = -2232.155531

|   |             |             |             |
|---|-------------|-------------|-------------|
| C | 3.45774100  | 0.01392700  | 0.53205200  |
| C | 3.33437200  | 1.03754700  | 1.72976700  |
| H | 2.62542900  | 0.60816800  | 2.44127500  |
| H | 4.29367000  | 1.04202100  | 2.26078400  |
| C | 2.95988000  | 2.48050700  | 1.41413600  |
| C | 2.27401400  | 0.17316200  | -0.45166900 |
| H | 2.27532800  | -0.64431100 | -1.17344100 |
| H | 2.37203500  | 1.10867400  | -1.01650500 |
| N | 0.97338600  | 0.15621400  | 0.21120400  |
| C | -0.20036800 | -0.03994900 | -0.45920400 |
| N | -1.28547400 | 0.08965800  | 0.39982400  |
| C | -2.66596400 | 0.03916800  | 0.12863100  |
| C | -3.23829700 | 0.56794000  | -1.03700000 |
| C | -3.49998800 | -0.49853600 | 1.11666200  |
| C | -4.62176200 | 0.53334600  | -1.19941300 |
| C | -4.88315300 | -0.51512500 | 0.94274200  |
| H | -3.07025500 | -0.90840700 | 2.02616200  |
| C | -5.45725500 | -0.00567300 | -0.21966100 |
| H | -6.53128900 | -0.02459700 | -0.35914900 |
| C | -5.75135000 | -1.15806000 | 1.99232700  |
| C | -5.23785000 | 1.16697000  | -2.42150800 |
| F | -5.22678900 | -1.01253600 | 3.23114400  |
| F | -5.88979300 | -2.48608100 | 1.77951600  |
| F | -6.99236200 | -0.62834700 | 2.01037200  |
| F | -4.40177700 | 1.14909700  | -3.47816900 |
| F | -5.56146000 | 2.46178100  | -2.19227500 |
| F | -6.37648600 | 0.53784000  | -2.78696600 |
| S | -0.30449900 | -0.43005500 | -2.08269300 |
| C | 3.42325300  | -1.42098300 | 1.19483300  |
| H | 2.49500100  | -1.47391100 | 1.76903500  |
| H | 4.23608700  | -1.44687500 | 1.93380500  |
| H | -2.60959100 | 0.99131100  | -1.80695900 |

|   |             |             |             |
|---|-------------|-------------|-------------|
| C | 1.85417000  | 3.08439600  | 1.91075500  |
| H | -1.06009400 | -0.03929100 | 1.37956100  |
| H | 0.91015700  | 0.75909000  | 1.02265600  |
| C | 4.78849800  | 0.20993200  | -0.22671900 |
| C | 4.86216200  | 0.31842400  | -1.62445400 |
| C | 6.00294800  | 0.24619000  | 0.48141900  |
| C | 6.08720400  | 0.46967700  | -2.28076000 |
| H | 3.96438200  | 0.28240900  | -2.23083600 |
| C | 7.22696400  | 0.39662500  | -0.16757200 |
| H | 6.00408400  | 0.14417800  | 1.56301200  |
| C | 7.27685700  | 0.51292900  | -1.55767200 |
| H | 6.10279300  | 0.55236600  | -3.36438000 |
| H | 8.14355900  | 0.42027100  | 0.41626600  |
| H | 8.22899500  | 0.63199400  | -2.06730600 |
| C | 3.54985700  | -2.64108500 | 0.29413600  |
| C | 2.50394700  | -3.43753300 | -0.02365600 |
| C | 3.97486900  | 3.21579700  | 0.56040200  |
| H | 3.84337600  | 4.29833300  | 0.57501400  |
| H | 4.98910400  | 3.00294200  | 0.91799100  |
| H | 3.95283500  | 2.88895000  | -0.48605400 |
| C | 4.96104400  | -2.96983500 | -0.17334800 |
| H | 5.12872300  | -4.04791300 | -0.24494200 |
| H | 5.19900300  | -2.53142800 | -1.15028800 |
| H | 5.70093700  | -2.57368400 | 0.52863300  |
| C | 1.08547800  | -3.27907400 | 0.47642400  |
| H | 0.72540800  | -4.23803200 | 0.87507100  |
| H | 0.96631400  | -2.52769400 | 1.25807300  |
| H | 0.41138300  | -3.01044200 | -0.34770500 |
| C | 1.45784800  | 4.51341600  | 1.59732400  |
| H | 2.00607700  | 4.95722600  | 0.76616600  |
| H | 0.39027500  | 4.55967300  | 1.34368700  |
| H | 1.59292100  | 5.15960200  | 2.47678200  |
| C | 0.86151500  | 2.45459000  | 2.87083100  |
| H | 0.72670700  | 3.10767900  | 3.74378700  |
| H | -0.13527700 | 2.36982400  | 2.41098000  |
| H | 1.14908200  | 1.47332900  | 3.25579200  |
| C | 2.63546800  | -4.64057900 | -0.93578600 |
| H | 3.57164600  | -4.67233000 | -1.49487100 |
| H | 2.54688200  | -5.57775900 | -0.36631500 |
| H | 1.81632200  | -4.64604000 | -1.66658300 |

AT-7-2

0 imaginary frequencies

H = -2231.671363

G = -2231.792413

E(M06-2X-DCM) = -2232.155546

|   |             |             |             |
|---|-------------|-------------|-------------|
| C | 3.08104300  | 0.00971600  | 0.18505600  |
| C | 2.72772100  | -0.47880600 | -1.27667400 |
| H | 2.67261900  | -1.56851700 | -1.22862800 |
| H | 1.70208300  | -0.14119900 | -1.47482300 |
| C | 3.60375400  | -0.04788900 | -2.44232200 |
| C | 1.96782400  | -0.56221900 | 1.11327900  |
| H | 2.24782700  | -0.41840300 | 2.16303500  |
| H | 1.83323700  | -1.63087600 | 0.94407700  |
| N | 0.66277300  | 0.05298300  | 0.91242500  |
| C | -0.48535700 | -0.59375900 | 0.56568600  |
| N | -1.55549900 | 0.28928400  | 0.51593300  |
| C | -2.91762300 | 0.05077400  | 0.25051200  |
| C | -3.59799300 | -1.09369200 | 0.68925400  |
| C | -3.63029000 | 1.05744800  | -0.41294000 |
| C | -4.96354700 | -1.21896800 | 0.43921000  |
| C | -4.99891100 | 0.92319000  | -0.64068400 |
| H | -3.11740900 | 1.95341000  | -0.75074500 |
| C | -5.67779300 | -0.21951100 | -0.22295000 |
| H | -6.74267800 | -0.32148700 | -0.39234900 |
| C | -5.72910500 | 1.99853100  | -1.40160400 |
| C | -5.67689800 | -2.47737100 | 0.86644300  |
| F | -5.66586700 | 1.79477300  | -2.73682200 |
| F | -5.20049100 | 3.22225400  | -1.16741700 |
| F | -7.03610400 | 2.04918200  | -1.07004800 |
| F | -6.97554500 | -2.23775700 | 1.15706000  |
| F | -5.11089900 | -3.03038800 | 1.95987800  |
| F | -5.65747000 | -3.41263100 | -0.10823800 |
| S | -0.58292200 | -2.22860200 | 0.20834400  |
| C | 3.04505100  | 1.58036900  | 0.24099000  |
| H | 2.23715700  | 1.89560600  | -0.41811200 |
| H | 3.95904900  | 1.96763500  | -0.22160600 |
| H | -3.06746800 | -1.86929300 | 1.22209400  |
| C | 4.55193200  | -0.84556100 | -2.98368100 |
| H | -1.29734600 | 1.26719300  | 0.44580600  |
| H | 0.57767600  | 0.98067900  | 1.31154900  |
| C | 4.44759600  | -0.57282700 | 0.59483300  |
| C | 4.56055800  | -1.72584600 | 1.39060500  |
| C | 5.64508500  | -0.00390400 | 0.12528600  |
| C | 5.80446000  | -2.27296600 | 1.71528800  |
| H | 3.67603500  | -2.22229400 | 1.77341200  |
| C | 6.88897300  | -0.54677200 | 0.44556400  |
| H | 5.61681600  | 0.87237100  | -0.51228900 |



|   |             |             |             |
|---|-------------|-------------|-------------|
| C | 6.97769200  | -1.68586200 | 1.24697600  |
| H | 5.84844700  | -3.16345800 | 2.33695100  |
| H | 7.79156200  | -0.07506500 | 0.06518200  |
| H | 7.94614100  | -2.10875200 | 1.49989300  |
| C | 2.89635700  | 2.24790800  | 1.60535600  |
| C | 1.88530300  | 3.10081400  | 1.90477400  |
| C | 3.29395100  | 1.32827400  | -3.01684700 |
| H | 3.92019100  | 2.12311000  | -2.58785100 |
| H | 3.42487800  | 1.36884200  | -4.10138500 |
| H | 2.25344800  | 1.60506700  | -2.81389100 |
| C | 4.03328300  | 1.95687200  | 2.56443600  |
| H | 4.99388300  | 2.15050900  | 2.07116900  |
| H | 4.00368800  | 2.55984000  | 3.47208700  |
| H | 4.06240000  | 0.90240800  | 2.86171100  |
| C | 0.79276800  | 3.53732800  | 0.94436200  |
| H | 0.84011000  | 4.62520800  | 0.79606800  |
| H | 0.83601400  | 3.07914800  | -0.04518400 |
| H | -0.20424200 | 3.34721000  | 1.37259200  |
| C | 5.42484100  | -0.42762000 | -4.14817300 |
| H | 5.29263800  | 0.61003800  | -4.45805100 |
| H | 6.48467000  | -0.56027000 | -3.88987900 |
| H | 5.24146400  | -1.06915800 | -5.02216700 |
| C | 4.88466800  | -2.24418100 | -2.51475100 |
| H | 5.90046000  | -2.27742600 | -2.09835900 |
| H | 4.21189300  | -2.63584100 | -1.75170300 |
| H | 4.87142000  | -2.93895000 | -3.36621400 |
| C | 1.72848400  | 3.80435800  | 3.23888300  |
| H | 2.38935500  | 3.43501400  | 4.02290000  |
| H | 1.90615000  | 4.88405700  | 3.13114600  |
| H | 0.69807400  | 3.69952900  | 3.60482300  |

AT-7-3

0 imaginary frequencies

H = -2231.671040

G = -2231.791671

E(M06-2X-DCM) = -2232.155680

|   |            |             |             |
|---|------------|-------------|-------------|
| C | 3.45705500 | 0.02008000  | 0.53283700  |
| C | 3.34408000 | 1.06930500  | 1.70915700  |
| H | 2.63514900 | 0.65937000  | 2.43214200  |
| H | 4.30524400 | 1.07895200  | 2.23670100  |
| C | 2.97735500 | 2.50758700  | 1.36433200  |
| C | 2.27081800 | 0.16574200  | -0.44977500 |
| H | 2.26617400 | -0.66555500 | -1.15559000 |
| H | 2.37112800 | 1.08972400  | -1.03291200 |

|   |             |             |             |
|---|-------------|-------------|-------------|
| N | 0.97233400  | 0.16726700  | 0.21750100  |
| C | -0.20460500 | -0.03154600 | -0.44593800 |
| N | -1.28670400 | 0.11864000  | 0.41387100  |
| C | -2.66736900 | 0.06674400  | 0.14364600  |
| C | -3.23829300 | 0.59033900  | -1.02475500 |
| C | -3.50282000 | -0.45906800 | 1.13680600  |
| C | -4.62226600 | 0.56123200  | -1.18596200 |
| C | -4.88638200 | -0.46685100 | 0.96595000  |
| H | -3.07416700 | -0.86086900 | 2.05039400  |
| C | -5.45930800 | 0.03733000  | -0.19959900 |
| H | -6.53456800 | 0.03928100  | -0.32968500 |
| C | -5.75815200 | -1.08513100 | 2.02740100  |
| C | -5.22496500 | 1.07815700  | -2.46827700 |
| F | -5.22692400 | -0.93058300 | 3.26232300  |
| F | -5.91412600 | -2.41388000 | 1.83212800  |
| F | -6.99233500 | -0.53961500 | 2.04355300  |
| F | -4.47370900 | 2.05482900  | -3.01965200 |
| F | -6.46360000 | 1.58157600  | -2.26714500 |
| F | -5.34297400 | 0.09806200  | -3.39047300 |
| S | -0.31640200 | -0.44579400 | -2.06295000 |
| C | 3.41698300  | -1.40062700 | 1.22525300  |
| H | 2.48973000  | -1.43720200 | 1.80242300  |
| H | 4.23128500  | -1.41524100 | 1.96287800  |
| H | -2.60940400 | 1.01882200  | -1.79165100 |
| C | 1.87598800  | 3.12804400  | 1.84993100  |
| H | -1.06032900 | 0.00184600  | 1.39490200  |
| H | 0.91549500  | 0.78018900  | 1.02179800  |
| C | 4.78605700  | 0.19249800  | -0.23475100 |
| C | 4.85499500  | 0.27109100  | -1.63473500 |
| C | 6.00335400  | 0.23681600  | 0.46800500  |
| C | 6.07838200  | 0.40139000  | -2.29857800 |
| H | 3.95473000  | 0.22761700  | -2.23693900 |
| C | 7.22572900  | 0.36645500  | -0.18851700 |
| H | 6.00803000  | 0.15770700  | 1.55150200  |
| C | 7.27100200  | 0.45303700  | -1.58094000 |
| H | 6.09032700  | 0.46112400  | -3.38375100 |
| H | 8.14464900  | 0.39719200  | 0.39132200  |
| H | 8.22185700  | 0.55582200  | -2.09647900 |
| C | 3.53578200  | -2.63948000 | 0.34939700  |
| C | 2.48504800  | -3.43587400 | 0.04786200  |
| C | 3.99505500  | 3.21900300  | 0.49378000  |
| H | 5.00871000  | 3.00760300  | 0.85387200  |
| H | 3.96901200  | 2.87075600  | -0.54565400 |
| H | 3.86997500  | 4.30237000  | 0.48625000  |

|   |             |             |             |
|---|-------------|-------------|-------------|
| C | 4.94475700  | -2.98631700 | -0.11170400 |
| H | 5.10550400  | -4.06665800 | -0.16193700 |
| H | 5.18533800  | -2.56888200 | -1.09715100 |
| H | 5.68730500  | -2.58112900 | 0.58229400  |
| C | 1.06783400  | -3.25926900 | 0.54537500  |
| H | 0.39521800  | -3.00012100 | -0.28300700 |
| H | 0.70144500  | -4.20885300 | 0.96033600  |
| H | 0.95415600  | -2.49397300 | 1.31425900  |
| C | 1.48714200  | 4.55237300  | 1.50720300  |
| H | 1.62589600  | 5.21582700  | 2.37313100  |
| H | 2.03738300  | 4.97608200  | 0.66694100  |
| H | 0.41973200  | 4.59897600  | 1.25288700  |
| C | 0.88116000  | 2.52405800  | 2.82416000  |
| H | 1.16458800  | 1.55016400  | 3.23038100  |
| H | 0.75005800  | 3.19661300  | 3.68277800  |
| H | -0.11632100 | 2.43379900  | 2.36689000  |
| C | 2.60926700  | -4.65749900 | -0.84032500 |
| H | 3.54339000  | -4.70356100 | -1.40187100 |
| H | 2.51964200  | -5.58278100 | -0.25186100 |
| H | 1.78755800  | -4.67485800 | -1.56802200 |

INT-12

0 imaginary frequency

H = -5236.813398

G = -5237.009413

E(M06-2X-DCM) = -5237.659624

E(M06-2X-cyclohexane) = -5237.635116

|   |             |             |             |
|---|-------------|-------------|-------------|
| C | -0.78395300 | 4.96565500  | 0.35201100  |
| C | -1.69814500 | 4.63640600  | 1.57925200  |
| H | -1.62643200 | 3.56617800  | 1.80260200  |
| H | -1.29521700 | 5.16814600  | 2.45177800  |
| C | -3.15110400 | 5.01108200  | 1.44598300  |
| C | -1.42772400 | 4.39747600  | -0.93704100 |
| H | -0.85801900 | 4.69606700  | -1.82449800 |
| H | -2.42646300 | 4.81984200  | -1.05605600 |
| N | -1.57991500 | 2.95085900  | -0.88654400 |
| C | -2.60269000 | 2.26433500  | -1.45424600 |
| N | -2.48456300 | 0.90028400  | -1.24763200 |
| C | -3.41377800 | -0.12871500 | -1.43275500 |
| C | -4.80621900 | 0.06170300  | -1.44272100 |
| C | -2.91253800 | -1.43649500 | -1.53306100 |
| C | -5.65582600 | -1.03473900 | -1.56883200 |
| C | -3.78108800 | -2.52028200 | -1.65219900 |
| H | -1.84075100 | -1.60511000 | -1.50537600 |

|   |             |             |             |
|---|-------------|-------------|-------------|
| C | -5.16178200 | -2.33454900 | -1.68232900 |
| H | -5.83389600 | -3.17700300 | -1.78952500 |
| C | -3.22202500 | -3.91316000 | -1.65460900 |
| C | -7.14402900 | -0.82480200 | -1.47316200 |
| F | -4.04308100 | -4.80051200 | -2.25013400 |
| F | -3.01456900 | -4.36744700 | -0.38483500 |
| F | -2.02314100 | -3.98446500 | -2.28175800 |
| F | -7.52226100 | 0.39266600  | -1.90462000 |
| F | -7.57233000 | -0.93713700 | -0.18613200 |
| F | -7.82948500 | -1.74586200 | -2.18637300 |
| S | -3.83517300 | 2.99919800  | -2.34153700 |
| H | -5.21226900 | 1.05883400  | -1.35630500 |
| C | -4.16218900 | 4.14210100  | 1.48284100  |
| H | -1.57012100 | 0.59083100  | -0.91807300 |
| H | -0.79496100 | 2.41551100  | -0.52306200 |
| H | 1.93743100  | 1.31994700  | 1.66433000  |
| O | 0.11050100  | -1.46734400 | 0.95801500  |
| O | 2.30092100  | -1.27040500 | -0.39402000 |
| P | 1.15450400  | -0.41024000 | 0.33814900  |
| O | 0.39011300  | 0.60318900  | -0.42860700 |
| C | 1.38983500  | -4.03775800 | 3.99689400  |
| C | 1.72117000  | -4.30354500 | 2.67313900  |
| C | 1.19317500  | -3.52273600 | 1.63210300  |
| C | 0.07124100  | -2.10700700 | 3.28616600  |
| C | 0.53297600  | -2.97439000 | 4.28810100  |
| C | 1.97220900  | -2.19482100 | -1.41153700 |
| C | 1.55356900  | -3.47400300 | -1.05380500 |
| C | 1.14561000  | -4.34830700 | -2.07678500 |
| C | 1.22925100  | -3.97626800 | -3.41371600 |
| C | 1.72391400  | -2.71475500 | -3.74200500 |
| C | 2.09651700  | -1.79040700 | -2.75400900 |
| H | 0.23554900  | -2.78271800 | 5.31476700  |
| H | 1.81262100  | -2.41836200 | -4.78294100 |
| C | 1.49735100  | -4.19284300 | 0.29451200  |
| C | 2.84560800  | -4.90093600 | 0.65145000  |
| H | 3.07905200  | -5.72339300 | -0.03184700 |
| H | 3.65740600  | -4.16710900 | 0.59191700  |
| H | -0.30345700 | -5.96664000 | -1.98817900 |
| H | 1.35129500  | -6.45249500 | -1.61403200 |
| C | 0.46569400  | -2.38775100 | 1.96481700  |
| H | 1.78833300  | -4.65018900 | 4.80157500  |
| H | 0.91031800  | -4.65820900 | -4.19743200 |
| C | 2.65932700  | -5.35487500 | 2.11846700  |
| H | 2.22163200  | -6.36076200 | 2.17638600  |

|   |             |             |             |
|---|-------------|-------------|-------------|
| H | 3.60595200  | -5.39028800 | 2.66878300  |
| C | 0.61940100  | -5.64094000 | -1.49864400 |
| C | 0.40486500  | -5.27513100 | -0.01759600 |
| H | 0.46956200  | -6.13353000 | 0.65696100  |
| H | -0.58663000 | -4.82901400 | 0.10425900  |
| C | 2.63773600  | -0.45300500 | -3.16120300 |
| C | 4.03714300  | -0.23915200 | -3.14053900 |
| C | 1.76603900  | 0.55622100  | -3.63358200 |
| C | 4.97159100  | -1.25197700 | -2.75206900 |
| C | 4.56893500  | 1.03963700  | -3.55344500 |
| C | 2.31194800  | 1.82989800  | -4.04817500 |
| C | 6.32175800  | -1.01497800 | -2.74997200 |
| H | 4.59627200  | -2.22669500 | -2.46031200 |
| C | 5.98315100  | 1.24940100  | -3.52577500 |
| C | 3.69253000  | 2.03919000  | -3.98701500 |
| C | 6.83863800  | 0.25479600  | -3.13467500 |
| H | 7.00801800  | -1.80420700 | -2.45475100 |
| H | 6.36504200  | 2.21998400  | -3.83378600 |
| H | 4.09773500  | 2.99835900  | -4.30415700 |
| H | 7.91166600  | 0.42522400  | -3.12410200 |
| C | -0.82855300 | -0.95617100 | 3.61413800  |
| C | -2.17553000 | -0.97786000 | 3.17060900  |
| C | -0.34969900 | 0.13147100  | 4.38559700  |
| C | -2.73580600 | -2.06918300 | 2.43270900  |
| C | -3.04668900 | 0.13411300  | 3.47763300  |
| C | -1.23644000 | 1.23300900  | 4.69171600  |
| C | -4.03825500 | -2.05070800 | 2.00694400  |
| H | -2.11596200 | -2.92975200 | 2.20843300  |
| C | -4.39783500 | 0.11714900  | 3.00746100  |
| C | -2.55351400 | 1.20742500  | 4.22543000  |
| C | -4.88325400 | -0.93912800 | 2.28444300  |
| H | -4.42518800 | -2.89115300 | 1.43964800  |
| H | -5.03229300 | 0.96949400  | 3.23890800  |
| H | -3.21231400 | 2.04376900  | 4.45014500  |
| H | -5.90168800 | -0.93235800 | 1.90787700  |
| C | -0.46702200 | 1.37773500  | -4.19514400 |
| H | -1.54040400 | 1.22425900  | -4.25189500 |
| C | 0.34788200  | 0.37940800  | -3.72938000 |
| H | -0.08184100 | -0.56956000 | -3.42835800 |
| C | 0.07571200  | 2.63374800  | -4.59224700 |
| H | -0.59086300 | 3.41273100  | -4.95070700 |
| C | 1.42565400  | 2.84933000  | -4.52006500 |
| H | 1.85397400  | 3.80010000  | -4.82934700 |
| C | 1.43001900  | 1.28691900  | 5.60260700  |

|   |             |             |             |
|---|-------------|-------------|-------------|
| H | 2.46044500  | 1.32083200  | 5.94390000  |
| C | 0.54969900  | 2.36386500  | 5.90787700  |
| H | 0.90962900  | 3.20444800  | 6.49504100  |
| C | -0.74450100 | 2.33368500  | 5.46198200  |
| H | -1.42938100 | 3.14775900  | 5.68788500  |
| C | 0.99588900  | 0.21191500  | 4.87095000  |
| H | 1.68258000  | -0.59659000 | 4.64929200  |
| N | 2.11661600  | 0.32142800  | 1.52744600  |
| S | 3.57547300  | -0.14421100 | 2.24160600  |
| C | 4.87143400  | -0.05728500 | 0.85646800  |
| O | 3.51388900  | -1.54210700 | 2.63775100  |
| O | 3.91372600  | 0.93173600  | 3.16449600  |
| F | 6.00166100  | 0.38457200  | 1.40664300  |
| F | 5.06730100  | -1.26940100 | 0.35320900  |
| F | 4.48216100  | 0.78599300  | -0.09658100 |
| C | 0.64142000  | 4.41724700  | 0.58032900  |
| C | 1.16541900  | 4.23199500  | 1.87214100  |
| C | 1.49616700  | 4.13661900  | -0.50196200 |
| C | 2.48376200  | 3.81414200  | 2.07465700  |
| H | 0.55070500  | 4.40951200  | 2.74680400  |
| C | 2.81317400  | 3.71818800  | -0.30645600 |
| H | 1.13754400  | 4.23592500  | -1.52063300 |
| C | 3.31966600  | 3.56503400  | 0.98425800  |
| H | 2.85350800  | 3.67765700  | 3.08677900  |
| H | 3.43634600  | 3.49945800  | -1.16903900 |
| H | 4.34383500  | 3.24136000  | 1.14271000  |
| C | -0.71252900 | 6.52798500  | 0.20468500  |
| H | -1.73274000 | 6.90931800  | 0.08028300  |
| H | -0.33816900 | 6.92243200  | 1.16054100  |
| C | 0.14215700  | 7.06849400  | -0.91067700 |
| C | -0.31888500 | 7.77976900  | -1.94151000 |
| H | -1.37745800 | 8.00554300  | -2.05566600 |
| H | -3.99299000 | 3.07205000  | 1.58240200  |
| H | -3.37891500 | 6.07223300  | 1.34238900  |
| H | 1.21127700  | 6.87257300  | -0.83973200 |
| H | -5.19608700 | 4.46530000  | 1.39905600  |
| H | 0.34415700  | 8.16813200  | -2.71030300 |

INT-12'

0 imaginary frequency

H = -5236.796689

G = -5236.995619

E(M06-2X-DCM) = -5237.655289

E(M06-2X-cyclohexane) = -5237.625075

|   |             |             |             |
|---|-------------|-------------|-------------|
| O | -0.83445400 | -2.31161100 | 0.64075200  |
| O | -2.76999500 | -0.63733200 | 0.22866200  |
| P | -1.14203900 | -0.71666200 | 0.39876300  |
| O | -0.53056700 | -0.20899200 | -0.87225900 |
| C | -1.80323300 | -4.89432500 | -2.51166200 |
| C | -2.76822200 | -4.50406200 | -1.58869100 |
| C | -2.41989000 | -3.70521000 | -0.48997200 |
| C | -0.11085800 | -3.62632700 | -1.27288600 |
| C | -0.48431400 | -4.48240200 | -2.32478100 |
| C | -3.59926300 | -1.07350900 | 1.26823000  |
| C | -3.85316700 | -2.43801600 | 1.41446700  |
| C | -4.54590400 | -2.88795500 | 2.54995900  |
| C | -5.07460500 | -1.98504300 | 3.46498700  |
| C | -4.91947000 | -0.61999400 | 3.23081200  |
| C | -4.17762800 | -0.13157200 | 2.14201600  |
| H | 0.28586600  | -4.81186400 | -3.01578100 |
| H | -5.36383300 | 0.09987800  | 3.91166700  |
| C | -3.59126100 | -3.61544700 | 0.47914400  |
| C | -4.78648600 | -3.83093600 | -0.51030500 |
| H | -5.02440200 | -2.87302600 | -0.98817800 |
| H | -5.69081900 | -4.18240100 | -0.00402200 |
| H | -5.59246600 | -4.77541000 | 2.32951300  |
| H | -4.34950300 | -4.80278500 | 3.57568500  |
| C | -1.12066700 | -3.21285400 | -0.38281000 |
| H | -2.06356700 | -5.52405200 | -3.35890300 |
| H | -5.61354100 | -2.33224800 | 4.34294600  |
| C | -4.24791000 | -4.82239400 | -1.56521900 |
| H | -4.72248200 | -4.69753900 | -2.54554200 |
| H | -4.42570600 | -5.86379500 | -1.26219900 |
| C | -4.59161600 | -4.39987000 | 2.58558800  |
| C | -3.55220100 | -4.79009300 | 1.51407200  |
| H | -2.55349700 | -4.82727300 | 1.96393200  |
| H | -3.74640300 | -5.76238000 | 1.05039000  |
| C | -4.11150600 | 1.34989400  | 1.93932300  |
| C | -3.45426300 | 2.16950100  | 2.88840500  |
| C | -4.82871700 | 1.93738200  | 0.86701600  |
| C | -2.68643400 | 1.63494600  | 3.97207400  |
| C | -3.53555200 | 3.60800900  | 2.76927300  |
| C | -4.88465300 | 3.37713600  | 0.75007000  |
| C | -2.06564800 | 2.45471500  | 4.87672400  |
| H | -2.56442200 | 0.56226000  | 4.04640200  |
| C | -2.88348000 | 4.42755100  | 3.74345500  |
| C | -4.24613800 | 4.17051100  | 1.70664200  |
| C | -2.17240000 | 3.87053000  | 4.77107800  |

|   |             |             |             |
|---|-------------|-------------|-------------|
| H | -1.46381700 | 2.01974900  | 5.66920200  |
| H | -2.96239500 | 5.50766400  | 3.64234100  |
| H | -4.30241100 | 5.25384500  | 1.61994600  |
| H | -1.67406800 | 4.50337300  | 5.50057000  |
| C | 1.33030700  | -3.25278200 | -1.12922500 |
| C | 1.98062300  | -2.54932900 | -2.17370000 |
| C | 2.07445000  | -3.70789800 | -0.01118900 |
| C | 1.27747400  | -1.99969600 | -3.29563300 |
| C | 3.41228100  | -2.35500300 | -2.12311400 |
| C | 3.49548300  | -3.45060200 | 0.05297100  |
| C | 1.94150100  | -1.36505200 | -4.31415100 |
| H | 0.19678300  | -2.07336000 | -3.32442700 |
| C | 4.07016700  | -1.70988700 | -3.21938600 |
| C | 4.12859000  | -2.79847500 | -1.00843900 |
| C | 3.35963200  | -1.23257000 | -4.28905600 |
| H | 1.37583800  | -0.95757200 | -5.14726200 |
| H | 5.15246900  | -1.60970100 | -3.17992700 |
| H | 5.20152700  | -2.62551500 | -0.96316100 |
| H | 3.87288600  | -0.75133100 | -5.11789800 |
| C | -6.22932500 | 1.76889300  | -1.13325100 |
| H | -6.76312100 | 1.15768300  | -1.85639500 |
| C | -5.54356400 | 1.16892100  | -0.10830500 |
| H | -5.54746000 | 0.08820500  | -0.02251100 |
| C | -6.25991500 | 3.18726900  | -1.25606800 |
| H | -6.80672200 | 3.64665200  | -2.07501000 |
| C | -5.60882900 | 3.96327000  | -0.33499100 |
| H | -5.63313700 | 5.04819600  | -0.40808500 |
| C | 2.23752100  | -4.86131900 | 2.13778800  |
| H | 1.76314900  | -5.41428000 | 2.94401900  |
| C | 3.63049100  | -4.57777200 | 2.20878700  |
| H | 4.20524800  | -4.90982300 | 3.06905200  |
| C | 4.23864900  | -3.89718800 | 1.18985600  |
| H | 5.30447700  | -3.68398400 | 1.22220000  |
| C | 1.49060500  | -4.44785300 | 1.06624200  |
| H | 0.43406900  | -4.68417000 | 1.02980000  |
| C | -1.40879200 | 2.55655800  | -3.32822600 |
| C | -2.03342000 | 2.81507000  | -1.92348200 |
| H | -3.12424100 | 2.82883100  | -2.03811100 |
| H | -1.79722000 | 1.98050800  | -1.25841500 |
| C | -1.59897100 | 4.10095400  | -1.26710900 |
| C | 0.13286700  | 2.69529000  | -3.23865000 |
| H | 0.34771100  | 3.72682400  | -2.94360400 |
| H | 0.57567200  | 2.51205500  | -4.22548600 |
| N | 0.76606200  | 1.80387600  | -2.25580800 |



|   |              |              |              |
|---|--------------|--------------|--------------|
| C | 1. 98758100  | 1. 96417300  | -1. 77305300 |
| N | 2. 44439100  | 1. 22789300  | -0. 75778000 |
| C | 3. 75831000  | 1. 34750600  | -0. 19191200 |
| C | 3. 90224500  | 1. 88307200  | 1. 09181100  |
| C | 4. 86330900  | 0. 87951000  | -0. 89909200 |
| C | 5. 17702700  | 1. 96016700  | 1. 65174700  |
| C | 6. 13321100  | 0. 96724500  | -0. 32477100 |
| H | 4. 72492500  | 0. 43843600  | -1. 87960900 |
| C | 6. 29609100  | 1. 50815000  | 0. 94815500  |
| H | 7. 28225600  | 1. 57688900  | 1. 39065100  |
| C | 7. 31289100  | 0. 46645100  | -1. 11489900 |
| C | 5. 34399500  | 2. 49106000  | 3. 05478300  |
| F | 8. 45596600  | 0. 49401000  | -0. 40430100 |
| F | 7. 50835600  | 1. 20131100  | -2. 23235400 |
| F | 7. 12358600  | -0. 81437000 | -1. 52766900 |
| F | 6. 57112800  | 3. 03400500  | 3. 23150700  |
| F | 5. 20816100  | 1. 51298800  | 3. 97324100  |
| F | 4. 43234300  | 3. 44129200  | 3. 33804100  |
| S | 3. 12525900  | 3. 17891200  | -2. 40377700 |
| H | 3. 02893700  | 2. 21110900  | 1. 64616100  |
| H | 1. 81266200  | 0. 59284900  | -0. 24292800 |
| H | 0. 20522700  | 1. 03467100  | -1. 83535900 |
| C | -0. 93058300 | 4. 17609200  | -0. 11335500 |
| H | -0. 64775100 | 3. 29286300  | 0. 45591300  |
| H | 2. 37925900  | 3. 52914200  | -3. 46550200 |
| H | -0. 67131400 | 5. 13442000  | 0. 32972300  |
| N | -0. 82388300 | 0. 00601800  | 1. 80589800  |
| S | 0. 65236700  | 0. 23813400  | 2. 32704400  |
| O | 0. 86738200  | 1. 60388800  | 2. 82758700  |
| O | 1. 70520600  | -0. 30808000 | 1. 42563200  |
| C | 0. 74611400  | -0. 85278800 | 3. 84038100  |
| F | -0. 17153200 | -0. 47579200 | 4. 74315100  |
| F | 1. 95908800  | -0. 74447600 | 4. 39213800  |
| F | 0. 52778300  | -2. 12779400 | 3. 51020900  |
| C | -1. 80052500 | 1. 18230500  | -3. 91167200 |
| C | -2. 67341500 | 0. 30326000  | -3. 25745900 |
| C | -1. 30001100 | 0. 78857300  | -5. 16629900 |
| C | -3. 02274500 | -0. 92296300 | -3. 82979300 |
| H | -3. 08348200 | 0. 55162300  | -2. 28718200 |
| C | -1. 64981900 | -0. 43169900 | -5. 74211300 |
| H | -0. 62952900 | 1. 44320300  | -5. 71809000 |
| C | -2. 51482500 | -1. 29875600 | -5. 07118200 |
| H | -3. 68835900 | -1. 58857400 | -3. 28770900 |
| H | -1. 24877300 | -0. 70212400 | -6. 71567000 |

|   |             |             |             |
|---|-------------|-------------|-------------|
| H | -2.78682300 | -2.25373800 | -5.51235300 |
| C | -1.85793700 | 3.67930100  | -4.32836000 |
| H | -1.50231100 | 4.65257500  | -3.96959200 |
| H | -1.35500600 | 3.50330600  | -5.29005300 |
| C | -3.34204300 | 3.74995800  | -4.56464500 |
| C | -4.08103600 | 4.84977500  | -4.41310100 |
| H | -3.64921500 | 5.79301200  | -4.08343800 |
| H | -5.14812600 | 4.85256200  | -4.61809100 |
| H | -3.81804800 | 2.82809900  | -4.89650900 |
| H | -1.88793100 | 5.02747300  | -1.76472500 |

INT-12' -1

0 imaginary frequency

H = -5236.801616

G = -5236.999510

E(M06-2X-DCM) = -5237.652666

E(M06-2X-cyclohexane) = -5237.625220

|   |             |             |             |
|---|-------------|-------------|-------------|
| O | -0.74340600 | -2.58710900 | -0.89192100 |
| O | -2.68528700 | -1.01370300 | -0.19677300 |
| P | -1.05684100 | -1.15527900 | -0.15653500 |
| O | -0.50868300 | -0.00126600 | -0.94822800 |
| C | -1.81512100 | -2.86043900 | -4.93038000 |
| C | -2.74690400 | -3.10875500 | -3.92771700 |
| C | -2.36262700 | -3.09311800 | -2.57876700 |
| C | -0.08759800 | -2.48930100 | -3.23259300 |
| C | -0.49425800 | -2.58641500 | -4.57525800 |
| C | -3.48646700 | -1.98217400 | 0.41361100  |
| C | -3.74074000 | -3.18069200 | -0.25406700 |
| C | -4.40702200 | -4.21184100 | 0.42753600  |
| C | -4.90875200 | -4.01070000 | 1.70861500  |
| C | -4.75133700 | -2.76168400 | 2.30812100  |
| C | -4.03388400 | -1.72670900 | 1.68621100  |
| H | 0.24804900  | -2.41811000 | -5.34995600 |
| H | -5.17233300 | -2.57609200 | 3.29190300  |
| C | -3.50618200 | -3.59704500 | -1.70538800 |
| C | -4.72860600 | -3.21187200 | -2.60683600 |
| H | -4.96992300 | -2.15593700 | -2.43850200 |
| H | -5.62163200 | -3.80005700 | -2.37385400 |
| H | -5.46523900 | -5.63514500 | -0.82136300 |
| H | -4.19204400 | -6.36471100 | 0.15111700  |
| C | -1.06258400 | -2.72209200 | -2.24222100 |
| H | -2.10446200 | -2.88397400 | -5.97809700 |
| H | -5.42732300 | -4.80822800 | 2.23476300  |
| C | -4.22540400 | -3.40540800 | -4.05424100 |

|   |              |              |              |
|---|--------------|--------------|--------------|
| H | -4. 72756200 | -2. 74299400 | -4. 76862700 |
| H | -4. 39695000 | -4. 43320700 | -4. 40392700 |
| C | -4. 45699100 | -5. 46605900 | -0. 41758800 |
| C | -3. 44564500 | -5. 15289000 | -1. 54062100 |
| H | -2. 43618800 | -5. 43230700 | -1. 21793900 |
| H | -3. 65563600 | -5. 68039100 | -2. 47638100 |
| C | -3. 94147400 | -0. 39956000 | 2. 37444400  |
| C | -3. 20541300 | -0. 26969200 | 3. 57668300  |
| C | -4. 69334300 | 0. 69522400  | 1. 87844400  |
| C | -2. 41539200 | -1. 33359900 | 4. 11847100  |
| C | -3. 22658800 | 0. 98439400  | 4. 29649800  |
| C | -4. 69461500 | 1. 94718400  | 2. 60204400  |
| C | -1. 71838000 | -1. 17801500 | 5. 28679800  |
| H | -2. 33947500 | -2. 26146400 | 3. 56666600  |
| C | -2. 49267100 | 1. 10094500  | 5. 51856900  |
| C | -3. 96413300 | 2. 05677200  | 3. 78869300  |
| C | -1. 76298800 | 0. 05069200  | 6. 00457300  |
| H | -1. 10225300 | -1. 99242400 | 5. 65589700  |
| H | -2. 52631100 | 2. 04911800  | 6. 05046200  |
| H | -3. 97922700 | 2. 99729400  | 4. 33646100  |
| H | -1. 20308500 | 0. 15292800  | 6. 93026400  |
| C | 1. 34376700  | -2. 17746500 | -2. 92636700 |
| C | 1. 90188800  | -0. 94377000 | -3. 34634400 |
| C | 2. 16558100  | -3. 15007900 | -2. 30353400 |
| C | 1. 12276000  | 0. 10306500  | -3. 93973800 |
| C | 3. 31572400  | -0. 69948700 | -3. 16790800 |
| C | 3. 56701000  | -2. 86973000 | -2. 08706200 |
| C | 1. 69835800  | 1. 27115700  | -4. 36968700 |
| H | 0. 05310100  | -0. 03408700 | -4. 03697000 |
| C | 3. 88201900  | 0. 52516600  | -3. 64841600 |
| C | 4. 10629500  | -1. 65985100 | -2. 53179900 |
| C | 3. 10105300  | 1. 48399800  | -4. 23774800 |
| H | 1. 07823000  | 2. 04199100  | -4. 82040800 |
| H | 4. 95373300  | 0. 67182400  | -3. 53490400 |
| H | 5. 16387300  | -1. 45751800 | -2. 37587900 |
| H | 3. 54529800  | 2. 40524100  | -4. 60591400 |
| C | -6. 23094100 | 1. 68645500  | 0. 25180800  |
| H | -6. 83520000 | 1. 59213300  | -0. 64645800 |
| C | -5. 49804700 | 0. 61605700  | 0. 69582400  |
| H | -5. 53182500 | -0. 31914700 | 0. 14864000  |
| C | -6. 21606000 | 2. 92191700  | 0. 96092200  |
| H | -6. 81275900 | 3. 75689000  | 0. 60249300  |
| C | -5. 46807000 | 3. 04286000  | 2. 10273400  |
| H | -5. 46386800 | 3. 97293200  | 2. 66733100  |

|   |              |              |              |
|---|--------------|--------------|--------------|
| C | 2. 49782600  | -5. 34637000 | -1. 28451100 |
| H | 2. 09733300  | -6. 30903500 | -0. 97838100 |
| C | 3. 87039200  | -5. 05256900 | -1. 04851800 |
| H | 4. 50290600  | -5. 78856200 | -0. 55978000 |
| C | 4. 38664500  | -3. 84927200 | -1. 44479600 |
| H | 5. 43564100  | -3. 61378200 | -1. 28192100 |
| C | 1. 67874700  | -4. 43177600 | -1. 89244900 |
| H | 0. 63897000  | -4. 67992700 | -2. 06964000 |
| C | -1. 75749800 | 3. 93163600  | -0. 89690800 |
| C | -1. 76352700 | 4. 07157700  | 0. 65691400  |
| H | -2. 80832100 | 4. 16678900  | 0. 97891400  |
| H | -1. 40117500 | 3. 14019100  | 1. 10594500  |
| C | -0. 98975400 | 5. 24180200  | 1. 20199500  |
| C | -0. 31607600 | 3. 65789500  | -1. 40208300 |
| H | 0. 29876100  | 4. 55094900  | -1. 30865100 |
| H | -0. 35277900 | 3. 38758400  | -2. 46360400 |
| N | 0. 37034400  | 2. 55608800  | -0. 71194500 |
| C | 1. 60945400  | 2. 55458400  | -0. 24527500 |
| N | 2. 21606700  | 1. 40474400  | 0. 06363300  |
| C | 3. 55400000  | 1. 28533600  | 0. 57071800  |
| C | 4. 62401500  | 1. 48940300  | -0. 29560800 |
| C | 3. 76688200  | 0. 90263900  | 1. 89729900  |
| C | 5. 92967400  | 1. 32363300  | 0. 17216000  |
| C | 5. 07656400  | 0. 75010000  | 2. 35104800  |
| H | 2. 92355400  | 0. 70976400  | 2. 55230900  |
| C | 6. 16162400  | 0. 95828200  | 1. 49522500  |
| H | 7. 17435400  | 0. 83596600  | 1. 85916800  |
| C | 5. 32207900  | 0. 30058200  | 3. 77096000  |
| C | 7. 06385700  | 1. 50803700  | -0. 79973200 |
| F | 6. 53485900  | 0. 70761500  | 4. 21335600  |
| F | 5. 29253900  | -1. 04333900 | 3. 87688700  |
| F | 4. 39420400  | 0. 79278600  | 4. 61465200  |
| F | 7. 02600200  | 0. 56935900  | -1. 78256600 |
| F | 8. 26945400  | 1. 41773500  | -0. 20782800 |
| F | 6. 99660300  | 2. 70803800  | -1. 41769600 |
| S | 2. 55017600  | 4. 04819900  | 0. 01892000  |
| H | 4. 43528000  | 1. 74746700  | -1. 33227100 |
| H | 1. 71365500  | 0. 51231900  | -0. 05113100 |
| H | -0. 05942700 | 1. 60987600  | -0. 80793900 |
| C | -0. 11632200 | 5. 18022200  | 2. 21410400  |
| H | 0. 11225900  | 4. 24320500  | 2. 71884300  |
| H | 1. 48037500  | 4. 75916700  | 0. 46073300  |
| H | 0. 37124000  | 6. 07156500  | 2. 60183800  |
| N | -0. 66761000 | -1. 35451900 | 1. 39291200  |

|   |             |             |             |
|---|-------------|-------------|-------------|
| S | 0.83375500  | -1.47553600 | 1.89273200  |
| O | 1.06534000  | -0.72945800 | 3.13750900  |
| O | 1.84212900  | -1.30502500 | 0.81362700  |
| C | 0.97656900  | -3.27074500 | 2.39057400  |
| F | 0.09995800  | -3.54833400 | 3.36784700  |
| F | 2.21164700  | -3.51081000 | 2.84227200  |
| F | 0.72841700  | -4.07026200 | 1.35043900  |
| C | -2.30791100 | 5.21959800  | -1.54656000 |
| C | -1.61874100 | 5.95507600  | -2.52268000 |
| C | -3.58129500 | 5.68527000  | -1.16937700 |
| C | -2.16867700 | 7.10921300  | -3.08892700 |
| H | -0.64184100 | 5.63780000  | -2.87098600 |
| C | -4.13175700 | 6.83582100  | -1.73016800 |
| H | -4.16008600 | 5.13902900  | -0.43003500 |
| C | -3.42598200 | 7.55850100  | -2.69419500 |
| H | -1.60564200 | 7.65263100  | -3.84323600 |
| H | -5.11717200 | 7.16698300  | -1.41288100 |
| H | -3.85363300 | 8.45587900  | -3.13264400 |
| C | -2.68816100 | 2.73021900  | -1.27793300 |
| H | -2.31152800 | 1.81049900  | -0.81938200 |
| H | -3.66825100 | 2.91504600  | -0.82032600 |
| C | -2.87239800 | 2.51957900  | -2.75821300 |
| C | -2.58267500 | 1.38819800  | -3.40555400 |
| H | -2.16462700 | 0.52880100  | -2.88886300 |
| H | -2.76831600 | 1.28427500  | -4.47223400 |
| H | -3.29610400 | 3.35696900  | -3.31304100 |
| H | -1.20284100 | 6.21025200  | 0.74884400  |

INT-12' -2

0 imaginary frequency

H = -5236.783695

G = -5236.978241

E(M06-2X-DCM) = -5237.637328

E(M06-2X-cyclohexane) = -5237.609816

|   |             |            |             |
|---|-------------|------------|-------------|
| O | 0.16077100  | 2.49998900 | -0.28475000 |
| O | 2.54819100  | 1.53381900 | -0.67901000 |
| P | 1.00019600  | 1.09640900 | -0.36608800 |
| O | 0.57759300  | 0.20908100 | -1.49838900 |
| C | 0.22141900  | 5.05293700 | -3.61102300 |
| C | 1.23783100  | 5.09001200 | -2.66286400 |
| C | 1.18100000  | 4.27608500 | -1.52212300 |
| C | -0.93460200 | 3.34093000 | -2.29373000 |
| C | -0.86346500 | 4.20374400 | -3.40195600 |
| C | 3.26161300  | 2.29439100 | 0.24968400  |

|   |              |              |              |
|---|--------------|--------------|--------------|
| C | 3. 00057100  | 3. 65864800  | 0. 37607900  |
| C | 3. 55085600  | 4. 36538200  | 1. 45687500  |
| C | 4. 46698700  | 3. 75730500  | 2. 30781800  |
| C | 4. 85024500  | 2. 44101700  | 2. 05397100  |
| C | 4. 25668200  | 1. 67678900  | 1. 03392200  |
| H | -1. 68425500 | 4. 19052800  | -4. 11301000 |
| H | 5. 61719500  | 1. 97485300  | 2. 66516000  |
| C | 2. 30426700  | 4. 64040700  | -0. 56148000 |
| C | 3. 34619100  | 5. 24109800  | -1. 56945800 |
| H | 3. 91583000  | 4. 41741500  | -2. 01538900 |
| H | 4. 05945400  | 5. 91265300  | -1. 08211000 |
| H | 3. 78827400  | 6. 50861200  | 1. 20909700  |
| H | 2. 67124500  | 6. 06813000  | 2. 49570700  |
| C | 0. 13657200  | 3. 36417100  | -1. 38045000 |
| H | 0. 26007100  | 5. 68393500  | -4. 49543300 |
| H | 4. 90379700  | 4. 30329100  | 3. 14020900  |
| C | 2. 49605900  | 5. 92865100  | -2. 65719100 |
| H | 2. 99412500  | 5. 95098200  | -3. 63331600 |
| H | 2. 27476700  | 6. 97239500  | -2. 39245600 |
| C | 3. 01576400  | 5. 78137100  | 1. 49544600  |
| C | 1. 86731400  | 5. 73845400  | 0. 46228500  |
| H | 0. 94139600  | 5. 41330700  | 0. 95026000  |
| H | 1. 67529900  | 6. 70422700  | -0. 01586400 |
| C | 4. 78178900  | 0. 30008600  | 0. 77331900  |
| C | 4. 72084200  | -0. 69008500 | 1. 78496000  |
| C | 5. 48157600  | 0. 03579000  | -0. 43344300 |
| C | 4. 01563800  | -0. 49279400 | 3. 01555200  |
| C | 5. 39170500  | -1. 95661700 | 1. 59387500  |
| C | 6. 11629500  | -1. 24912300 | -0. 62403900 |
| C | 4. 01797200  | -1. 44593200 | 4. 00099900  |
| H | 3. 45996700  | 0. 42409800  | 3. 15555500  |
| C | 5. 37059200  | -2. 92462400 | 2. 64800900  |
| C | 6. 05830200  | -2. 20646000 | 0. 39216800  |
| C | 4. 71535200  | -2. 67579900 | 3. 82401400  |
| H | 3. 47232400  | -1. 26476000 | 4. 92312800  |
| H | 5. 89524500  | -3. 86450600 | 2. 49225200  |
| H | 6. 55402300  | -3. 16401600 | 0. 24734900  |
| H | 4. 71216200  | -3. 41687300 | 4. 61875500  |
| C | -2. 17203800 | 2. 51624600  | -2. 12587200 |
| C | -2. 47077600 | 1. 49360000  | -3. 05811800 |
| C | -3. 10838200 | 2. 85712700  | -1. 11896600 |
| C | -1. 54576700 | 1. 07258800  | -4. 06874300 |
| C | -3. 74717100 | 0. 81804400  | -2. 99478800 |
| C | -4. 37558300 | 2. 16455700  | -1. 06125900 |

|   |             |             |             |
|---|-------------|-------------|-------------|
| C | -1.86712100 | 0.08167500  | -4.96054600 |
| H | -0.56682000 | 1.53589700  | -4.10521800 |
| C | -4.04381200 | -0.20964800 | -3.94496900 |
| C | -4.66396700 | 1.17212400  | -2.00201500 |
| C | -3.13547100 | -0.56632600 | -4.90550600 |
| H | -1.14388500 | -0.22183300 | -5.71293400 |
| H | -5.00332400 | -0.71520300 | -3.86987900 |
| H | -5.61855500 | 0.65295400  | -1.95497800 |
| H | -3.37118400 | -1.34997500 | -5.62070300 |
| C | 6.32611100  | 0.71899800  | -2.62608600 |
| H | 6.42337700  | 1.47692700  | -3.39880300 |
| C | 5.63403000  | 1.00397000  | -1.47824500 |
| H | 5.19824000  | 1.98732500  | -1.35026500 |
| C | 6.92645200  | -0.55748500 | -2.81736800 |
| H | 7.47259700  | -0.76523600 | -3.73374200 |
| C | 6.82440600  | -1.50931100 | -1.83938200 |
| H | 7.28546600  | -2.48601300 | -1.96325700 |
| C | -3.80380300 | 4.19599200  | 0.80391800  |
| H | -3.59420800 | 4.97930000  | 1.52738200  |
| C | -5.04180000 | 3.49663600  | 0.86843100  |
| H | -5.76263300 | 3.74050200  | 1.64353400  |
| C | -5.31865400 | 2.51772700  | -0.04658500 |
| H | -6.26367700 | 1.98320800  | -0.01268100 |
| C | -2.87565700 | 3.89129300  | -0.15657300 |
| H | -1.94176600 | 4.43991200  | -0.19186400 |
| C | 1.57613600  | -4.37630400 | -0.29344900 |
| C | 0.51677600  | -5.45706400 | -0.71662300 |
| H | 0.44122100  | -5.43628000 | -1.81022300 |
| H | 0.95130200  | -6.43623800 | -0.46989200 |
| C | -0.88385300 | -5.43006000 | -0.15386500 |
| C | 1.02672500  | -2.93242300 | -0.46212500 |
| H | 0.70215000  | -2.77533700 | -1.48856000 |
| H | 1.81347400  | -2.20558100 | -0.24336500 |
| N | -0.10098800 | -2.60907200 | 0.41141000  |
| C | -1.31843700 | -2.22644000 | 0.06419100  |
| N | -2.21546800 | -2.06471700 | 1.06255400  |
| C | -3.59229000 | -1.74775200 | 0.96750800  |
| C | -4.42405700 | -2.39284400 | 0.04882500  |
| C | -4.12684900 | -0.82849200 | 1.87760900  |
| C | -5.78305700 | -2.08032700 | 0.01638200  |
| C | -5.49454000 | -0.56574100 | 1.86179800  |
| H | -3.47020300 | -0.29454100 | 2.55441300  |
| C | -6.33062700 | -1.18094800 | 0.92916100  |
| H | -7.39175700 | -0.96046700 | 0.91282700  |

|   |             |             |             |
|---|-------------|-------------|-------------|
| C | -6.09773600 | 0.36233300  | 2.88605200  |
| C | -6.66048300 | -2.67573200 | -1.05223400 |
| F | -6.63747500 | -0.33347200 | 3.91417900  |
| F | -7.09932400 | 1.10382300  | 2.35328200  |
| F | -5.19274300 | 1.20898600  | 3.40649900  |
| F | -6.76238500 | -1.84468600 | -2.12239000 |
| F | -7.91631800 | -2.89141600 | -0.60939600 |
| F | -6.17820900 | -3.84945400 | -1.51073700 |
| S | -1.73967500 | -1.86859100 | -1.61593600 |
| H | -4.02763000 | -3.14303200 | -0.62348600 |
| H | -1.78585700 | -1.90665000 | 1.97970900  |
| H | 0.10146900  | -2.62321500 | 1.41254500  |
| C | -1.98349300 | -5.55192100 | -0.90219900 |
| H | -1.93555100 | -5.61383400 | -1.98740600 |
| H | -0.71426700 | -0.92870300 | -1.69456400 |
| H | -2.97328800 | -5.61240400 | -0.45623200 |
| N | 1.00455300  | 0.49985600  | 1.14233100  |
| S | -0.18157100 | 0.42929600  | 2.17384800  |
| O | -0.22408700 | -0.90457700 | 2.84426300  |
| O | -1.48686100 | 0.94769900  | 1.72917100  |
| C | 0.34420200  | 1.58597000  | 3.54501700  |
| F | 0.61427900  | 2.79449500  | 3.04298300  |
| F | 1.43343300  | 1.12679600  | 4.17835300  |
| F | -0.64775300 | 1.69323400  | 4.43502800  |
| C | 2.76843500  | -4.55027600 | -1.27360100 |
| C | 3.21319100  | -3.54088200 | -2.14069100 |
| C | 3.43127900  | -5.79011000 | -1.33670800 |
| C | 4.26604300  | -3.76357400 | -3.03352200 |
| H | 2.75887800  | -2.55706500 | -2.14093200 |
| C | 4.48047000  | -6.01554000 | -2.22464900 |
| H | 3.12520100  | -6.60529000 | -0.68718300 |
| C | 4.90420700  | -4.99979900 | -3.08330700 |
| H | 4.58775000  | -2.95371100 | -3.68140700 |
| H | 4.96444700  | -6.98863100 | -2.24550100 |
| H | 5.72040300  | -5.17203500 | -3.77979500 |
| C | 2.14321800  | -4.58964700 | 1.15638000  |
| H | 2.75729500  | -5.49807400 | 1.13140200  |
| H | 2.83623700  | -3.76658900 | 1.36692000  |
| C | 1.18359400  | -4.74092100 | 2.31192100  |
| C | 1.07756800  | -3.89232300 | 3.33933500  |
| H | 1.66136100  | -2.97721300 | 3.39654400  |
| H | 0.39842200  | -4.08559600 | 4.16601500  |
| H | 0.58652700  | -5.65274100 | 2.32668500  |
| H | -0.99492400 | -5.37849100 | 0.92665200  |



INT-12-1

0 imaginary frequency

H = -5236.811538

G = -5237.007330

E(M06-2X-DCM) = -5237.654220

E(M06-2X-cyclohexane) = -5237.628983

|   |             |             |             |
|---|-------------|-------------|-------------|
| C | -0.85055700 | 5.32143900  | -0.43496100 |
| C | -2.15673000 | 5.80021700  | 0.27341100  |
| H | -1.89244100 | 6.48322400  | 1.08849600  |
| H | -2.69006500 | 6.41129500  | -0.47091400 |
| C | -3.13661500 | 4.77605100  | 0.78828900  |
| C | -1.17938900 | 4.35321000  | -1.61123800 |
| H | -0.33221000 | 4.32715100  | -2.30898500 |
| H | -2.04005900 | 4.72923000  | -2.16755500 |
| N | -1.48893000 | 2.98668700  | -1.21695500 |
| C | -2.53744500 | 2.25652300  | -1.67603100 |
| N | -2.45040200 | 0.93278300  | -1.29698700 |
| C | -3.38558500 | -0.10251600 | -1.43854800 |
| C | -4.77534700 | 0.09298600  | -1.38805600 |
| C | -2.88919600 | -1.40792000 | -1.56360100 |
| C | -5.63269300 | -0.99930700 | -1.49504200 |
| C | -3.76413400 | -2.48965300 | -1.66128700 |
| H | -1.81741500 | -1.57584100 | -1.58222100 |
| C | -5.14379700 | -2.29838400 | -1.64215700 |
| H | -5.82189800 | -3.13778400 | -1.73774600 |
| C | -3.21032400 | -3.88438100 | -1.70579600 |
| C | -7.11777000 | -0.79323700 | -1.35253800 |
| F | -2.02271300 | -3.94468200 | -2.35457100 |
| F | -4.04574600 | -4.75328000 | -2.30853800 |
| F | -2.98375100 | -4.37074200 | -0.45137100 |
| F | -7.50142500 | 0.44998500  | -1.69631100 |
| F | -7.51971500 | -0.98947900 | -0.06741500 |
| F | -7.81954700 | -1.66583400 | -2.10941300 |
| S | -3.78775200 | 2.90169000  | -2.61357300 |
| H | -5.17567600 | 1.08938800  | -1.27292600 |
| C | -3.61247500 | 4.74623000  | 2.03466300  |
| H | -1.53462500 | 0.63329100  | -0.95827000 |
| H | -4.36479800 | 4.02338400  | 2.33902200  |
| H | -0.74873300 | 2.48545200  | -0.73240900 |
| H | 1.85345900  | 1.22585200  | 1.69335400  |
| O | 0.12588300  | -1.57576000 | 0.91382100  |
| O | 2.31465000  | -1.30827700 | -0.44049700 |
| P | 1.14672000  | -0.48929700 | 0.30678800  |

|   |             |             |             |
|---|-------------|-------------|-------------|
| O | 0.36946600  | 0.52060700  | -0.45215100 |
| C | 1.47148200  | -4.24028500 | 3.84838800  |
| C | 1.79033100  | -4.45236900 | 2.51219500  |
| C | 1.24438400  | -3.63731800 | 1.50747300  |
| C | 0.12684500  | -2.29541700 | 3.22427900  |
| C | 0.60906900  | -3.19708400 | 4.18682600  |
| C | 2.00257100  | -2.20190700 | -1.49157000 |
| C | 1.58519700  | -3.49317200 | -1.17810500 |
| C | 1.18093200  | -4.33585100 | -2.22851100 |
| C | 1.27425000  | -3.92433300 | -3.55300600 |
| C | 1.77301600  | -2.65449200 | -3.83855400 |
| C | 2.13612800  | -1.75816800 | -2.82087100 |
| H | 0.32070100  | -3.04672700 | 5.22276200  |
| H | 1.87010400  | -2.32696900 | -4.86931600 |
| C | 1.53654600  | -4.25794600 | 0.14375200  |
| C | 2.89075600  | -4.97491200 | 0.45872400  |
| H | 3.11727600  | -5.77168100 | -0.25655200 |
| H | 3.70017700  | -4.23734000 | 0.41436800  |
| H | -0.27514000 | -5.94941500 | -2.18939400 |
| H | 1.37847500  | -6.45607800 | -1.83973400 |
| C | 0.50736000  | -2.52236600 | 1.88824300  |
| H | 1.88234400  | -4.88013400 | 4.62503500  |
| H | 0.96129700  | -4.58203800 | -4.35955000 |
| C | 2.72458700  | -5.48029800 | 1.91026100  |
| H | 2.28972900  | -6.48873200 | 1.93844400  |
| H | 3.67801000  | -5.53269900 | 2.44741400  |
| C | 0.65144100  | -5.64535100 | -1.69260800 |
| C | 0.44424200  | -5.33060200 | -0.19861300 |
| H | 0.51448000  | -6.21138200 | 0.44587000  |
| H | -0.54709100 | -4.89066400 | -0.05536200 |
| C | 2.66813900  | -0.40776900 | -3.19338800 |
| C | 4.06235700  | -0.16827500 | -3.13215700 |
| C | 1.79367800  | 0.58522700  | -3.69478000 |
| C | 5.00545300  | -1.16978400 | -2.73636500 |
| C | 4.58141100  | 1.12400200  | -3.51868400 |
| C | 2.32958500  | 1.86701600  | -4.09711300 |
| C | 6.35057700  | -0.90851200 | -2.69738800 |
| H | 4.64118200  | -2.15576800 | -2.46941200 |
| C | 5.98962200  | 1.36113100  | -3.44646900 |
| C | 3.70111700  | 2.10671300  | -3.98014000 |
| C | 6.85319200  | 0.37695500  | -3.04687100 |
| H | 7.04377000  | -1.69004300 | -2.39797600 |
| H | 6.36080200  | 2.34295500  | -3.73083900 |
| H | 4.09759000  | 3.07504100  | -4.27941200 |

|   |             |             |             |
|---|-------------|-------------|-------------|
| H | 7.92207600  | 0.56723100  | -3.00442100 |
| C | -0.77873200 | -1.17375300 | 3.62719200  |
| C | -2.13038200 | -1.17709800 | 3.19740000  |
| C | -0.30703000 | -0.14968600 | 4.48646900  |
| C | -2.68865700 | -2.21458300 | 2.38426600  |
| C | -3.01242600 | -0.10749700 | 3.60720500  |
| C | -1.20799600 | 0.90268600  | 4.90265600  |
| C | -3.99857200 | -2.18167900 | 1.98344400  |
| H | -2.06300800 | -3.04698000 | 2.08339500  |
| C | -4.36869000 | -0.10318300 | 3.15321700  |
| C | -2.52763200 | 0.90005800  | 4.44505500  |
| C | -4.85257000 | -1.10595400 | 2.35754600  |
| H | -4.38528600 | -2.98331500 | 1.36283300  |
| H | -5.00881100 | 0.72151300  | 3.45777400  |
| H | -3.19689800 | 1.70106500  | 4.75233700  |
| H | -5.87657500 | -1.08380200 | 1.99730300  |
| C | -0.43033200 | 1.35284800  | -4.36023200 |
| H | -1.49719000 | 1.17648300  | -4.45931400 |
| C | 0.38336000  | 0.38020500  | -3.84107400 |
| H | -0.04078600 | -0.57125300 | -3.54055900 |
| C | 0.10452800  | 2.61199700  | -4.75851700 |
| H | -0.56009100 | 3.36833100  | -5.16593400 |
| C | 1.44411100  | 2.86012500  | -4.62344400 |
| H | 1.86629700  | 3.81496400  | -4.92870800 |
| C | 1.46379300  | 0.91494500  | 5.79660700  |
| H | 2.49727600  | 0.93586100  | 6.12968600  |
| C | 0.56672400  | 1.93753800  | 6.21721500  |
| H | 0.91598000  | 2.72016800  | 6.88540800  |
| C | -0.72961200 | 1.92933100  | 5.77620500  |
| H | -1.42672600 | 2.70461600  | 6.08573500  |
| C | 1.04234900  | -0.08971600 | 4.96453700  |
| H | 1.74317200  | -0.85679600 | 4.65717900  |
| N | 2.08341400  | 0.24248000  | 1.51641500  |
| S | 3.54475000  | -0.19815100 | 2.23671300  |
| C | 4.85210200  | 0.00211000  | 0.87919300  |
| O | 3.53300100  | -1.61251300 | 2.57381100  |
| O | 3.83065700  | 0.85057500  | 3.20768500  |
| F | 5.08094100  | -1.17174900 | 0.30615800  |
| F | 4.44751900  | 0.89288800  | -0.02646100 |
| F | 5.96585800  | 0.43667000  | 1.46488700  |
| H | -3.53106100 | 4.07404800  | 0.05785300  |
| H | -3.27854300 | 5.44713700  | 2.79886900  |
| C | 0.18896200  | 4.69507000  | 0.51012400  |
| C | 0.01020600  | 4.62040200  | 1.89885200  |

|   |             |            |             |
|---|-------------|------------|-------------|
| C | 1.39538100  | 4.19606800 | -0.01427000 |
| C | 0.99590900  | 4.08833800 | 2.73188600  |
| H | -0.91328400 | 4.96425300 | 2.34491000  |
| C | 2.38898200  | 3.67221800 | 0.81310800  |
| H | 1.57476000  | 4.21657300 | -1.08585900 |
| C | 2.19759900  | 3.62051400 | 2.19782600  |
| H | 0.82070400  | 4.03385100 | 3.80263500  |
| H | 3.31179100  | 3.30225100 | 0.37397200  |
| H | 2.97102100  | 3.22290800 | 2.84819500  |
| C | -0.20881000 | 6.58265600 | -1.12324400 |
| H | 0.70813500  | 6.27391500 | -1.63726500 |
| H | -0.90863200 | 6.91732900 | -1.90399300 |
| C | 0.10630700  | 7.74143600 | -0.21590300 |
| H | -0.74387200 | 8.28272300 | 0.19838500  |
| C | 1.33790400  | 8.15051300 | 0.09160300  |
| H | 2.22163800  | 7.64906200 | -0.29743600 |
| H | 1.51138800  | 9.00102800 | 0.74558400  |

INT-12-2

0 imaginary frequency

H = -5236.813701

G = -5237.008911

E(M06-2X-DCM) = -5237.657575

E(M06-2X-cyclohexane) = -5237.633088

|   |             |             |             |
|---|-------------|-------------|-------------|
| C | -0.78277600 | 5.22403600  | 0.42919800  |
| C | -2.09924400 | 5.20574700  | 1.26970100  |
| H | -1.96945100 | 5.90504600  | 2.10934200  |
| H | -2.89543500 | 5.63556300  | 0.65043000  |
| C | -2.56721100 | 3.88056900  | 1.81524500  |
| C | -1.03052200 | 4.54769600  | -0.94402400 |
| H | -0.17052500 | 4.69899000  | -1.60558600 |
| H | -1.88419900 | 5.02971600  | -1.42376300 |
| N | -1.33798800 | 3.12915900  | -0.87215500 |
| C | -2.44800000 | 2.53429600  | -1.37306800 |
| N | -2.41525100 | 1.16504400  | -1.19172500 |
| C | -3.39509900 | 0.19365400  | -1.42938400 |
| C | -4.77639600 | 0.43586900  | -1.34591800 |
| C | -2.95221900 | -1.11164800 | -1.69167400 |
| C | -5.67532200 | -0.60832600 | -1.55000300 |
| C | -3.86836800 | -2.14440500 | -1.88654000 |
| H | -1.88789700 | -1.31777300 | -1.74076100 |
| C | -5.23954600 | -1.90445400 | -1.83094300 |
| H | -5.95080400 | -2.70367300 | -2.00085300 |
| C | -3.36739600 | -3.54640000 | -2.07898800 |

|   |             |             |             |
|---|-------------|-------------|-------------|
| C | -7.15006400 | -0.36329300 | -1.36792900 |
| F | -4.24168300 | -4.32067200 | -2.75142500 |
| F | -3.14184800 | -4.16481400 | -0.88345100 |
| F | -2.19076900 | -3.58400500 | -2.74989600 |
| F | -7.49005200 | 0.92226500  | -1.57433000 |
| F | -7.54813200 | -0.67936400 | -0.10554000 |
| F | -7.89159200 | -1.12491800 | -2.20328500 |
| S | -3.68940700 | 3.36568800  | -2.16028800 |
| H | -5.13458000 | 1.43108300  | -1.12757700 |
| C | -3.82529200 | 3.44258300  | 1.74203500  |
| H | -1.51178100 | 0.78675200  | -0.90659800 |
| H | -4.12101700 | 2.49189800  | 2.17708900  |
| H | -0.62043000 | 2.52378700  | -0.48409200 |
| H | 1.93188700  | 1.04792100  | 1.77571100  |
| O | 0.08922700  | -1.61664400 | 0.76428000  |
| O | 2.28799400  | -1.30152200 | -0.56175600 |
| P | 1.15014900  | -0.51654900 | 0.26238100  |
| O | 0.41252300  | 0.59098200  | -0.39239700 |
| C | 1.33450300  | -4.62918600 | 3.38976600  |
| C | 1.64547500  | -4.70933900 | 2.03728100  |
| C | 1.13051900  | -3.77260400 | 1.12648100  |
| C | 0.05722000  | -2.58508300 | 2.98006400  |
| C | 0.50768900  | -3.59951500 | 3.84000100  |
| C | 1.94185100  | -2.06163200 | -1.70399000 |
| C | 1.47401400  | -3.36097700 | -1.52992300 |
| C | 1.03506600  | -4.06854000 | -2.66266800 |
| C | 1.14410200  | -3.51925400 | -3.93517300 |
| C | 1.69252600  | -2.24602000 | -4.08408800 |
| C | 2.09105600  | -1.48019800 | -2.97719800 |
| H | 0.22274200  | -3.55105600 | 4.88662300  |
| H | 1.80071500  | -1.81244000 | -5.07379000 |
| C | 1.39591400  | -4.25832300 | -0.29666500 |
| C | 2.72080600  | -5.05731400 | -0.06617200 |
| H | 2.91355300  | -5.78345700 | -0.86194200 |
| H | 3.55918800  | -4.35183000 | -0.03925500 |
| H | -0.48541300 | -5.61738800 | -2.78704700 |
| H | 1.14690800  | -6.22462800 | -2.50314500 |
| C | 0.43437600  | -2.67864300 | 1.62757600  |
| H | 1.72225000  | -5.36226200 | 4.09235000  |
| H | 0.80447900  | -4.07230100 | -4.80684700 |
| C | 2.53784000  | -5.70408500 | 1.32586000  |
| H | 2.06363200  | -6.69221000 | 1.25160500  |
| H | 3.48948400  | -5.84953200 | 1.84889400  |
| C | 0.45361300  | -5.40562000 | -2.26641100 |

|   |             |             |             |
|---|-------------|-------------|-------------|
| C | 0.26097900  | -5.24412000 | -0.74580700 |
| H | 0.29620500  | -6.19085800 | -0.19939200 |
| H | -0.71201600 | -4.78299400 | -0.55170400 |
| C | 2.66974400  | -0.11532200 | -3.19346300 |
| C | 4.07035200  | 0.06905900  | -3.09971100 |
| C | 1.82944500  | 0.96119800  | -3.56401800 |
| C | 4.97867600  | -1.00456600 | -2.83205600 |
| C | 4.63192500  | 1.38332300  | -3.31405900 |
| C | 2.40661400  | 2.26870000  | -3.78696200 |
| C | 6.33108500  | -0.79362400 | -2.75610400 |
| H | 4.58180300  | -2.00461700 | -2.69546100 |
| C | 6.04649100  | 1.56374300  | -3.20898600 |
| C | 3.78474800  | 2.44653900  | -3.63916400 |
| C | 6.87613700  | 0.50930400  | -2.93697500 |
| H | 6.99745500  | -1.62890000 | -2.55788600 |
| H | 6.45020600  | 2.56163400  | -3.36344400 |
| H | 4.21211700  | 3.43392400  | -3.80269000 |
| H | 7.95018800  | 0.65828100  | -2.86798600 |
| C | -0.81883800 | -1.48865200 | 3.50163800  |
| C | -2.17472200 | -1.42292500 | 3.09050800  |
| C | -0.31629700 | -0.56488900 | 4.45158800  |
| C | -2.75907400 | -2.35371000 | 2.17319600  |
| C | -3.03351100 | -0.39092200 | 3.62680200  |
| C | -1.19006700 | 0.45850800  | 4.98240900  |
| C | -4.07239000 | -2.25597800 | 1.79415900  |
| H | -2.15000300 | -3.15521600 | 1.77146600  |
| C | -4.39779900 | -0.32225700 | 3.20154400  |
| C | -2.51831200 | 0.51977900  | 4.55347900  |
| C | -4.90619200 | -1.22054800 | 2.30254800  |
| H | -4.47752300 | -2.97428000 | 1.08908500  |
| H | -5.02424600 | 0.46576300  | 3.61308100  |
| H | -3.16967100 | 1.29404200  | 4.95380700  |
| H | -5.93443800 | -1.14366800 | 1.96240000  |
| C | -0.36607900 | 1.88198500  | -4.11908300 |
| H | -1.43716500 | 1.75399400  | -4.24344100 |
| C | 0.41476200  | 0.82139300  | -3.74112700 |
| H | -0.03963600 | -0.14928600 | -3.57721500 |
| C | 0.20754300  | 3.16865600  | -4.33147300 |
| H | -0.43299900 | 3.99651400  | -4.62092400 |
| C | 1.55361100  | 3.35369800  | -4.16495000 |
| H | 2.00415700  | 4.33028300  | -4.32605200 |
| C | 1.49414800  | 0.33483600  | 5.82821400  |
| H | 2.53223400  | 0.30342500  | 6.14581700  |
| C | 0.62587600  | 1.33275200  | 6.35447900  |

|   |             |             |             |
|---|-------------|-------------|-------------|
| H | 1.00262400  | 2.04517900  | 7.08347600  |
| C | -0.67692600 | 1.39009900  | 5.93873000  |
| H | -1.35232100 | 2.14778900  | 6.32917700  |
| C | 1.03976100  | -0.57960200 | 4.91360200  |
| H | 1.71838200  | -1.33021800 | 4.52612800  |
| N | 2.11288500  | 0.07051800  | 1.53088100  |
| S | 3.54975400  | -0.48321100 | 2.22301100  |
| C | 4.87460200  | -0.26056700 | 0.88670300  |
| O | 3.47021200  | -1.91445000 | 2.46708000  |
| O | 3.87664400  | 0.48994400  | 3.25750900  |
| F | 5.02759100  | -1.39266000 | 0.21341800  |
| F | 4.53762400  | 0.73102700  | 0.06101600  |
| F | 6.01132600  | 0.04513600  | 1.50870800  |
| H | -1.82738400 | 3.27592800  | 2.33911500  |
| H | -4.59852800 | 4.00404400  | 1.22278900  |
| C | 0.40920100  | 4.61621700  | 1.19235000  |
| C | 0.53190800  | 4.77891500  | 2.58460100  |
| C | 1.45174000  | 3.94355000  | 0.53426800  |
| C | 1.62590500  | 4.27884000  | 3.28855000  |
| H | -0.24354800 | 5.29789900  | 3.13848500  |
| C | 2.55956500  | 3.45170100  | 1.23345400  |
| H | 1.42233400  | 3.79812300  | -0.54071700 |
| C | 2.65110000  | 3.60913600  | 2.61745100  |
| H | 1.67503200  | 4.40900200  | 4.36610000  |
| H | 3.35282800  | 2.94978500  | 0.68591200  |
| H | 3.50218500  | 3.21270600  | 3.16218300  |
| C | -0.47631600 | 6.73907400  | 0.14320000  |
| H | -1.36054700 | 7.18232000  | -0.33336900 |
| H | -0.36209100 | 7.23367000  | 1.11858200  |
| C | 0.73942600  | 7.03231700  | -0.69319900 |
| H | 1.69453600  | 6.69896700  | -0.28797200 |
| C | 0.72167700  | 7.68236100  | -1.85871000 |
| H | -0.20592200 | 8.03859900  | -2.30284000 |
| H | 1.63445000  | 7.89153300  | -2.41071700 |

INT-12-3

0 imaginary frequency

H = -5236.813582

G = -5237.008796

E(M06-2X-DCM) = -5237.659189

E(M06-2X-cyclohexane) = -5237.634542

|   |             |            |            |
|---|-------------|------------|------------|
| C | -1.17206900 | 5.06872400 | 0.24750100 |
| C | -2.29660700 | 4.99255700 | 1.32066200 |
| H | -1.95707900 | 5.56100600 | 2.19991600 |

|   |             |             |             |
|---|-------------|-------------|-------------|
| H | -3.15766900 | 5.54726300  | 0.93366300  |
| C | -2.76299100 | 3.62695200  | 1.75821100  |
| C | -1.63318500 | 4.37397100  | -1.06279400 |
| H | -0.97197000 | 4.65471300  | -1.89433000 |
| H | -2.63377600 | 4.71719900  | -1.32714000 |
| N | -1.70399800 | 2.92680800  | -0.96729200 |
| C | -2.72684300 | 2.16898800  | -1.43415100 |
| N | -2.51730500 | 0.82323500  | -1.20314000 |
| C | -3.36274100 | -0.27263600 | -1.41940000 |
| C | -4.76475400 | -0.20333500 | -1.35740100 |
| C | -2.75687100 | -1.51911500 | -1.63774800 |
| C | -5.52409600 | -1.35563800 | -1.54592900 |
| C | -3.53511900 | -2.66258600 | -1.81458700 |
| H | -1.67460500 | -1.59292500 | -1.66658100 |
| C | -4.92621400 | -2.59381800 | -1.78525800 |
| H | -5.52947400 | -3.47965000 | -1.94313600 |
| C | -2.86316400 | -3.99698700 | -1.95808200 |
| C | -7.02108900 | -1.29074900 | -1.39438300 |
| F | -2.59093800 | -4.55176800 | -0.74146000 |
| F | -1.67657000 | -3.90772900 | -2.60603900 |
| F | -3.62179900 | -4.88960900 | -2.62453100 |
| F | -7.51255400 | -0.06179600 | -1.63611400 |
| F | -7.40277400 | -1.62759500 | -0.13209100 |
| F | -7.64630100 | -2.15553900 | -2.22449700 |
| S | -4.06908800 | 2.80698800  | -2.23597600 |
| H | -5.24753400 | 0.74415500  | -1.16949000 |
| C | -4.04209400 | 3.24732400  | 1.77446800  |
| H | -1.57692200 | 0.57549000  | -0.89413100 |
| H | -4.33645100 | 2.25874200  | 2.11603400  |
| H | -0.88393800 | 2.44742700  | -0.60520600 |
| H | 1.81568500  | 1.32220200  | 1.77706700  |
| O | 0.27417400  | -1.55773800 | 0.82810400  |
| O | 2.43877300  | -1.03645200 | -0.48664900 |
| P | 1.21189400  | -0.35846500 | 0.30551300  |
| O | 0.36129200  | 0.63955800  | -0.38672700 |
| C | 1.81404500  | -4.29141900 | 3.59654800  |
| C | 2.15478300  | -4.39170100 | 2.25261900  |
| C | 1.54919800  | -3.56107100 | 1.29581300  |
| C | 0.31632000  | -2.42890200 | 3.08344000  |
| C | 0.86637700  | -3.34638900 | 3.99236000  |
| C | 2.19484000  | -1.87810700 | -1.59632100 |
| C | 1.88516100  | -3.21693100 | -1.37130400 |
| C | 1.54929700  | -4.01715300 | -2.47740200 |
| C | 1.60289900  | -3.50963600 | -3.77058900 |



|   |              |              |              |
|---|--------------|--------------|--------------|
| C | 1. 99284400  | -2. 18587200 | -3. 96855400 |
| C | 2. 28574200  | -1. 33448300 | -2. 89159800 |
| H | 0. 56126000  | -3. 28694200 | 5. 03279100  |
| H | 2. 05782600  | -1. 78229800 | -4. 97459800 |
| C | 1. 89748900  | -4. 06737200 | -0. 10190300 |
| C | 3. 30471000  | -4. 68936800 | 0. 18049500  |
| H | 3. 59927200  | -5. 41782600 | -0. 58134200 |
| H | 4. 05104600  | -3. 88684600 | 0. 19088800  |
| H | 0. 23468800  | -5. 74695900 | -2. 55277800 |
| H | 1. 92540300  | -6. 13397300 | -2. 22797000 |
| C | 0. 72302600  | -2. 53603400 | 1. 74034800  |
| H | 2. 27351200  | -4. 94311000 | 4. 33517700  |
| H | 1. 34230500  | -4. 13457900 | -4. 62061200 |
| C | 3. 17383200  | -5. 29853600 | 1. 59568500  |
| H | 2. 82411700  | -6. 33914300 | 1. 55550900  |
| H | 4. 12576500  | -5. 30630000 | 2. 13793400  |
| C | 1. 13218300  | -5. 39916200 | -2. 03204200 |
| C | 0. 89891500  | -5. 20244300 | -0. 52163700 |
| H | 1. 04234500  | -6. 11521800 | 0. 06344600  |
| H | -0. 12597000 | -4. 85778000 | -0. 35581700 |
| C | 2. 70737400  | 0. 07736600  | -3. 16577900 |
| C | 4. 07881100  | 0. 42004900  | -3. 08425500 |
| C | 1. 75474100  | 1. 03514000  | -3. 58707000 |
| C | 5. 09842700  | -0. 53042000 | -2. 75810100 |
| C | 4. 49395800  | 1. 77403100  | -3. 37297500 |
| C | 2. 18635500  | 2. 38248300  | -3. 88803100 |
| C | 6. 41904100  | -0. 16818400 | -2. 69576500 |
| H | 4. 81319600  | -1. 55847500 | -2. 56373800 |
| C | 5. 87996800  | 2. 11408100  | -3. 28206400 |
| C | 3. 53679800  | 2. 71775000  | -3. 75777200 |
| C | 6. 81885600  | 1. 17413000  | -2. 95193500 |
| H | 7. 17193500  | -0. 91250100 | -2. 45064200 |
| H | 6. 17270800  | 3. 13966900  | -3. 49458200 |
| H | 3. 85535200  | 3. 73337400  | -3. 98503200 |
| H | 7. 86980800  | 1. 44362500  | -2. 89374100 |
| C | -0. 68769400 | -1. 41575500 | 3. 53889100  |
| C | -2. 03531800 | -1. 53089200 | 3. 11271400  |
| C | -0. 30805600 | -0. 38209500 | 4. 43071700  |
| C | -2. 49570700 | -2. 58165700 | 2. 25635600  |
| C | -3. 01260300 | -0. 56739500 | 3. 56730200  |
| C | -1. 29804700 | 0. 57381000  | 4. 87693300  |
| C | -3. 80537200 | -2. 65939200 | 1. 86061600  |
| H | -1. 79323800 | -3. 33399100 | 1. 91656400  |
| C | -4. 36839000 | -0. 68178400 | 3. 12537100  |

|   |             |             |             |
|---|-------------|-------------|-------------|
| C | -2.61708700 | 0.45828000  | 4.43059400  |
| C | -4.75815000 | -1.69221200 | 2.28835900  |
| H | -4.11592500 | -3.46482700 | 1.20306700  |
| H | -5.08566800 | 0.05782700  | 3.47354400  |
| H | -3.35526900 | 1.18442200  | 4.76453900  |
| H | -5.78283900 | -1.75556100 | 1.93539400  |
| C | -0.52992100 | 1.68110400  | -4.17155200 |
| H | -1.58152300 | 1.43162800  | -4.27656800 |
| C | 0.36280800  | 0.73415200  | -3.74260500 |
| H | 0.01669000  | -0.26883300 | -3.51954200 |
| C | -0.09814500 | 3.00619700  | -4.46769000 |
| H | -0.82406800 | 3.74008300  | -4.80574200 |
| C | 1.22104100  | 3.34387100  | -4.32579600 |
| H | 1.56568300  | 4.34941600  | -4.55683000 |
| C | 1.36695800  | 0.80281500  | 5.76241300  |
| H | 2.39532500  | 0.90473300  | 6.09617500  |
| C | 0.38666800  | 1.73779000  | 6.20107800  |
| H | 0.67002800  | 2.53761600  | 6.87997200  |
| C | -0.90670200 | 1.62302100  | 5.76691300  |
| H | -1.66722400 | 2.32867800  | 6.09299700  |
| C | 1.03135000  | -0.21818300 | 4.91119000  |
| H | 1.79312200  | -0.91855300 | 4.58985200  |
| N | 2.09054300  | 0.35844500  | 1.56697400  |
| S | 3.57673600  | -0.02401100 | 2.27142000  |
| C | 4.87643700  | 0.33124000  | 0.93637100  |
| O | 3.65485600  | -1.45270400 | 2.53066400  |
| O | 3.78881200  | 0.98704600  | 3.29956600  |
| F | 5.95528500  | 0.80705400  | 1.55630300  |
| F | 5.18696600  | -0.79367700 | 0.30558600  |
| F | 4.42209000  | 1.23978700  | 0.07490900  |
| H | -2.00556200 | 2.92752700  | 2.11023100  |
| H | -4.83897200 | 3.89978100  | 1.42440500  |
| C | 0.18378100  | 4.51811700  | 0.73283000  |
| C | 0.46421000  | 4.27399200  | 2.08620800  |
| C | 1.23142800  | 4.32202900  | -0.18695000 |
| C | 1.73477500  | 3.86645400  | 2.50588600  |
| H | -0.30600800 | 4.40217900  | 2.83784400  |
| C | 2.50116400  | 3.92093100  | 0.22377300  |
| H | 1.06124000  | 4.48244000  | -1.24737000 |
| C | 2.76444000  | 3.69984000  | 1.57770800  |
| H | 1.91695300  | 3.68162800  | 3.56106200  |
| H | 3.28178600  | 3.77411700  | -0.51731600 |
| H | 3.75260800  | 3.39487800  | 1.90791200  |
| C | -0.92501500 | 6.58860900  | -0.08076800 |

|   |             |            |             |
|---|-------------|------------|-------------|
| H | -0.56964800 | 7.07722400 | 0.83470000  |
| H | -0.09611400 | 6.64150700 | -0.80043900 |
| C | -2.09905700 | 7.35377600 | -0.63310800 |
| H | -2.48827200 | 7.02653500 | -1.59744900 |
| C | -2.66282300 | 8.40855000 | -0.04142100 |
| H | -2.30941100 | 8.78318800 | 0.91750200  |
| H | -3.49467500 | 8.94181800 | -0.49380900 |

INT-12-4

0 imaginary frequency

H = -5236.804627

G = -5237.002441

E(M06-2X-DCM) = -5237.647830

E(M06-2X-cyclohexane) = -5237.621621

|   |             |             |             |
|---|-------------|-------------|-------------|
| C | 0.58842300  | 5.12683600  | 0.93966900  |
| C | -0.39846300 | 5.14972800  | 2.15180800  |
| H | 0.10444600  | 5.66786000  | 2.98204300  |
| H | -1.24736600 | 5.78764400  | 1.87794200  |
| C | -0.92126800 | 3.83056800  | 2.65888000  |
| C | -0.18519800 | 4.75742200  | -0.35080000 |
| H | 0.46097800  | 4.86046200  | -1.22990300 |
| H | -1.01300400 | 5.45700400  | -0.48173900 |
| N | -0.76334400 | 3.42427700  | -0.34656300 |
| C | -2.05356000 | 3.12643400  | -0.63318300 |
| N | -2.27939600 | 1.76386300  | -0.60524800 |
| C | -3.45838700 | 1.03679800  | -0.81499400 |
| C | -4.73581000 | 1.49448500  | -0.45102800 |
| C | -3.33073800 | -0.24946000 | -1.36068300 |
| C | -5.84796200 | 0.68407400  | -0.66697000 |
| C | -4.45593200 | -1.04834000 | -1.56282800 |
| H | -2.34817400 | -0.62230700 | -1.63130800 |
| C | -5.72795300 | -0.58723800 | -1.23132100 |
| H | -6.60394200 | -1.19967900 | -1.40799800 |
| C | -4.28462400 | -2.44738700 | -2.08073100 |
| C | -7.20454200 | 1.14217800  | -0.20024200 |
| F | -3.24989600 | -2.55127100 | -2.94802100 |
| F | -5.38685200 | -2.90371800 | -2.70797800 |
| F | -4.02184800 | -3.32805200 | -1.07128600 |
| F | -8.18628600 | 0.72719100  | -1.03205400 |
| F | -7.29194100 | 2.48080400  | -0.09781200 |
| F | -7.50110900 | 0.63168400  | 1.02625900  |
| S | -3.22499500 | 4.28452900  | -1.00925300 |
| H | -4.84934000 | 2.47455100  | -0.01192400 |
| C | -2.20661100 | 3.57684300  | 2.91036100  |

|   |             |             |             |
|---|-------------|-------------|-------------|
| H | -1.44034400 | 1.18809100  | -0.53773000 |
| H | -2.52751700 | 2.61729900  | 3.30592400  |
| H | -0.12635100 | 2.64783200  | -0.19258900 |
| H | 2.47777800  | 0.30775800  | 1.37100700  |
| O | -0.11508800 | -1.70022200 | 0.49921800  |
| O | 1.79695200  | -1.53478200 | -1.23861000 |
| P | 1.05137000  | -0.74372500 | -0.06186200 |
| O | 0.46900900  | 0.59100600  | -0.34167500 |
| C | 0.92788500  | -5.27644500 | 2.39718800  |
| C | 1.00551900  | -5.17480500 | 1.01261800  |
| C | 0.53267900  | -4.02897200 | 0.35110800  |
| C | -0.02140800 | -3.02499300 | 2.51720600  |
| C | 0.36798700  | -4.22773600 | 3.12929700  |
| C | 1.10598300  | -2.03883400 | -2.35735500 |
| C | 0.45802400  | -3.26450600 | -2.25214900 |
| C | -0.29780500 | -3.71027800 | -3.34985400 |
| C | -0.31977400 | -2.99218200 | -4.54073300 |
| C | 0.40910300  | -1.80720600 | -4.63935500 |
| C | 1.12588000  | -1.29144600 | -3.54796400 |
| H | 0.24560100  | -4.32208400 | 4.20406400  |
| H | 0.41369600  | -1.24711900 | -5.56958400 |
| C | 0.44454100  | -4.31823600 | -1.14734800 |
| C | 1.61426900  | -5.34589000 | -1.29282400 |
| H | 1.51932800  | -5.95940000 | -2.19395900 |
| H | 2.56096500  | -4.79809700 | -1.34972500 |
| H | -2.07480000 | -4.96214000 | -3.34718200 |
| H | -0.55936400 | -5.85740700 | -3.47391900 |
| C | 0.14167200  | -2.93849500 | 1.12063100  |
| H | 1.27921500  | -6.16930500 | 2.90797300  |
| H | -0.90205100 | -3.34550400 | -5.38755800 |
| C | 1.56484500  | -6.16793400 | 0.01595400  |
| H | 0.91442500  | -7.04762700 | -0.08316100 |
| H | 2.55192900  | -6.53781800 | 0.31486000  |
| C | -1.03478200 | -4.98387100 | -3.00672100 |
| C | -0.91909500 | -5.02654100 | -1.46977100 |
| H | -0.96861500 | -6.03791700 | -1.05645100 |
| H | -1.73697300 | -4.44534900 | -1.03230900 |
| C | 1.88315500  | -0.00783700 | -3.67979900 |
| C | 3.29941400  | -0.02824200 | -3.69870500 |
| C | 1.18071800  | 1.21200000  | -3.83234200 |
| C | 4.06255200  | -1.23530700 | -3.59676800 |
| C | 4.02648800  | 1.21153700  | -3.85041400 |
| C | 1.92244900  | 2.44265800  | -3.99701800 |
| C | 5.43248100  | -1.21725900 | -3.61798000 |

|   |             |             |             |
|---|-------------|-------------|-------------|
| H | 3.54090600  | -2.18168000 | -3.50674400 |
| C | 5.45630300  | 1.18662600  | -3.86368600 |
| C | 3.31964000  | 2.40908300  | -3.99450600 |
| C | 6.14344400  | 0.00904200  | -3.74746900 |
| H | 5.98516100  | -2.14907700 | -3.53577100 |
| H | 5.98555800  | 2.13028100  | -3.97310100 |
| H | 3.87204400  | 3.33887200  | -4.11536900 |
| H | 7.22981200  | 0.00297500  | -3.75829800 |
| C | -0.64299100 | -1.92851800 | 3.32735300  |
| C | -2.00827100 | -1.59894600 | 3.12363100  |
| C | 0.09909000  | -1.27606300 | 4.34315100  |
| C | -2.83928600 | -2.26091700 | 2.16436200  |
| C | -2.62158400 | -0.56770100 | 3.93114500  |
| C | -0.53212400 | -0.25693000 | 5.15154000  |
| C | -4.15311800 | -1.91106700 | 1.99251000  |
| H | -2.42180700 | -3.06161000 | 1.56500500  |
| C | -3.99270400 | -0.22473400 | 3.71095000  |
| C | -1.86886500 | 0.07375700  | 4.91874800  |
| C | -4.74049800 | -0.86859800 | 2.76304100  |
| H | -4.74916100 | -2.43091500 | 1.25006400  |
| H | -4.42782500 | 0.56514700  | 4.31865500  |
| H | -2.33848100 | 0.84449800  | 5.52645100  |
| H | -5.77216900 | -0.58253000 | 2.58317200  |
| C | -0.89593500 | 2.49726000  | -3.97118800 |
| H | -1.98065300 | 2.53811700  | -3.94285500 |
| C | -0.24972700 | 1.29822600  | -3.81908300 |
| H | -0.82889700 | 0.39133000  | -3.68537900 |
| C | -0.15964600 | 3.70394900  | -4.14611300 |
| H | -0.69337600 | 4.64263000  | -4.26196000 |
| C | 1.20901500  | 3.67297200  | -4.15690100 |
| H | 1.78478800  | 4.58611000  | -4.29008700 |
| C | 2.16318900  | -0.93081300 | 5.60786400  |
| H | 3.20582100  | -1.18035400 | 5.78454100  |
| C | 1.53350100  | 0.06504300  | 6.40665200  |
| H | 2.09578100  | 0.56289000  | 7.19187400  |
| C | 0.22436000  | 0.39169800  | 6.17752500  |
| H | -0.27051200 | 1.15362100  | 6.77498600  |
| C | 1.47220600  | -1.57290600 | 4.61334400  |
| H | 1.96722500  | -2.32326500 | 4.01239300  |
| N | 2.35886200  | -0.65596200 | 1.04270500  |
| S | 3.89426900  | -1.37573000 | 0.77580900  |
| C | 4.58105000  | -1.31817900 | 2.53105100  |
| O | 4.75309800  | -0.47949200 | 0.01239400  |
| O | 3.71806400  | -2.77972000 | 0.44109000  |

|   |             |             |             |
|---|-------------|-------------|-------------|
| F | 4.19131200  | -0.20014800 | 3.14906500  |
| F | 4.18258500  | -2.38181900 | 3.22295400  |
| F | 5.90742700  | -1.33069500 | 2.43078700  |
| H | -0.17914500 | 3.06168300  | 2.87275900  |
| H | -2.98559600 | 4.30834000  | 2.70668900  |
| C | 1.80832700  | 4.22267900  | 1.19200900  |
| C | 2.40884600  | 4.17189500  | 2.46333500  |
| C | 2.41450100  | 3.47848000  | 0.16824000  |
| C | 3.54982600  | 3.40803200  | 2.70398700  |
| H | 1.98261600  | 4.73693700  | 3.28652500  |
| C | 3.55899000  | 2.70941900  | 0.40084800  |
| H | 2.00813000  | 3.48785000  | -0.83720400 |
| C | 4.13382100  | 2.66962500  | 1.67161700  |
| H | 3.98414400  | 3.39310700  | 3.70038400  |
| H | 4.00300700  | 2.14854600  | -0.41655000 |
| H | 5.02841700  | 2.08030300  | 1.84992800  |
| C | 1.09677700  | 6.60859100  | 0.77556200  |
| H | 0.20694600  | 7.25393100  | 0.73483500  |
| H | 1.63935500  | 6.87592300  | 1.68996400  |
| C | 1.96774700  | 6.90085800  | -0.41696400 |
| H | 1.47684500  | 6.91101500  | -1.39021900 |
| C | 3.27322000  | 7.16816100  | -0.35623700 |
| H | 3.81121400  | 7.17808500  | 0.58948000  |
| H | 3.85519100  | 7.38735800  | -1.24764000 |

INT-12-5

0 imaginary frequency

H = -5236.799009

G = -5236.997869

E(M06-2X-DCM) = -5237.656333

E(M06-2X-cyclohexane) = -5237.626766

|   |             |             |             |
|---|-------------|-------------|-------------|
| O | -0.82165700 | -2.39732900 | 0.08896000  |
| O | -2.76546400 | -0.68254400 | 0.09782400  |
| P | -1.13633200 | -0.79115800 | 0.22531100  |
| O | -0.54276500 | -0.00032000 | -0.90053200 |
| C | -1.80155700 | -4.15993600 | -3.58169100 |
| C | -2.76196900 | -4.00631600 | -2.58697300 |
| C | -2.40942800 | -3.49108500 | -1.33122500 |
| C | -0.10551700 | -3.21712100 | -2.08516900 |
| C | -0.48259500 | -3.79841400 | -3.30917200 |
| C | -3.58312500 | -1.35809400 | 1.01024300  |
| C | -3.83367300 | -2.71884500 | 0.82814000  |
| C | -4.51725600 | -3.42873600 | 1.82838300  |
| C | -5.04007700 | -2.77189400 | 2.93627900  |

|   |             |             |             |
|---|-------------|-------------|-------------|
| C | -4.88776600 | -1.38995800 | 3.03437500  |
| C | -4.15494800 | -0.65376700 | 2.08830700  |
| H | 0.28412800  | -3.94926400 | -4.06326400 |
| H | -5.32730100 | -0.85492500 | 3.87092800  |
| C | -3.57535100 | -3.63873200 | -0.36246100 |
| C | -4.77572400 | -3.61699200 | -1.36875000 |
| H | -5.01907700 | -2.57384500 | -1.60359000 |
| H | -5.67615200 | -4.08255000 | -0.95620300 |
| H | -5.56251300 | -5.21203200 | 1.17006800  |
| H | -4.31166700 | -5.53248000 | 2.36652400  |
| C | -1.11113600 | -3.03284600 | -1.11697200 |
| H | -2.06537800 | -4.56958200 | -4.55365900 |
| H | -5.57211300 | -3.32034300 | 3.70956700  |
| C | -4.24075600 | -4.32669400 | -2.63226500 |
| H | -4.72143200 | -3.97371700 | -3.55213200 |
| H | -4.41421700 | -5.41097100 | -2.58493600 |
| C | -4.56059100 | -4.90563700 | 1.50260300  |
| C | -3.52746700 | -5.02586800 | 0.36283500  |
| H | -2.52578900 | -5.16574800 | 0.78507700  |
| H | -3.72287100 | -5.86042700 | -0.31789900 |
| C | -4.08789700 | 0.83335500  | 2.24316200  |
| C | -3.41944000 | 1.40434000  | 3.35286600  |
| C | -4.81022100 | 1.65893300  | 1.34534100  |
| C | -2.64674200 | 0.62733500  | 4.27431100  |
| C | -3.49316000 | 2.83092500  | 3.57536400  |
| C | -4.85747000 | 3.08615900  | 1.56930700  |
| C | -2.01561000 | 1.20918300  | 5.34149600  |
| H | -2.53000600 | -0.43327400 | 4.09346400  |
| C | -2.82984900 | 3.39617300  | 4.70957800  |
| C | -4.20697900 | 3.63025500  | 2.67970700  |
| C | -2.11527400 | 2.61063200  | 5.57222600  |
| H | -1.41113500 | 0.59793600  | 6.00518800  |
| H | -2.90327000 | 4.47014600  | 4.86541600  |
| H | -4.25625700 | 4.70404500  | 2.84929900  |
| H | -1.60877900 | 3.05248200  | 6.42618600  |
| C | 1.33506000  | -2.88240800 | -1.86102200 |
| C | 1.97737900  | -1.94031700 | -2.70241000 |
| C | 2.08599700  | -3.59371400 | -0.89092900 |
| C | 1.26685900  | -1.13786400 | -3.65459400 |
| C | 3.40801800  | -1.75434900 | -2.60799900 |
| C | 3.50574700  | -3.35126300 | -0.76868200 |
| C | 1.92338400  | -0.26792400 | -4.48710500 |
| H | 0.18658600  | -1.21017500 | -3.69876300 |
| C | 4.05803800  | -0.85530400 | -3.51365400 |

|   |              |              |              |
|---|--------------|--------------|--------------|
| C | 4. 13090500  | -2. 45347400 | -1. 63810500 |
| C | 3. 34078700  | -0. 13527500 | -4. 43243100 |
| H | 1. 35273700  | 0. 32724100  | -5. 19427400 |
| H | 5. 14006300  | -0. 76176800 | -3. 45372200 |
| H | 5. 20312700  | -2. 29035100 | -1. 55437800 |
| H | 3. 84747300  | 0. 53845800  | -5. 11891300 |
| C | -6. 22658600 | 1. 97027600  | -0. 62638400 |
| H | -6. 76997700 | 1. 54804500  | -1. 46774300 |
| C | -5. 53771600 | 1. 14358200  | 0. 22375700  |
| H | -5. 54872600 | 0. 07279300  | 0. 05454400  |
| C | -6. 24748700 | 3. 37826800  | -0. 41418500 |
| H | -6. 79575300 | 4. 01945100  | -1. 09898900 |
| C | -5. 58464700 | 3. 91380800  | 0. 65741100  |
| H | -5. 60119300 | 4. 98588300  | 0. 83996200  |
| C | 2. 26304900  | -5. 23913100 | 0. 90810100  |
| H | 1. 79462600  | -5. 97625200 | 1. 55466900  |
| C | 3. 65484500  | -4. 97370400 | 1. 04299600  |
| H | 4. 23472400  | -5. 50411000 | 1. 79339800  |
| C | 4. 25554200  | -4. 05964300 | 0. 22136500  |
| H | 5. 32051400  | -3. 85504700 | 0. 30233700  |
| C | 1. 50997300  | -4. 57908200 | -0. 02696600 |
| H | 0. 45443400  | -4. 80513900 | -0. 11805100 |
| C | -1. 43949800 | 3. 27273100  | -2. 66893000 |
| C | -2. 06208600 | 3. 22641200  | -1. 24098000 |
| H | -3. 15256600 | 3. 28073900  | -1. 34772500 |
| H | -1. 83967000 | 2. 26279500  | -0. 77480500 |
| C | -1. 61084200 | 4. 32918700  | -0. 31741100 |
| C | 0. 10353000  | 3. 36909500  | -2. 55620500 |
| H | 0. 34278900  | 4. 32210100  | -2. 07438300 |
| H | 0. 55757800  | 3. 36744000  | -3. 55366700 |
| N | 0. 71781000  | 2. 29890500  | -1. 75497500 |
| C | 1. 93098300  | 2. 39084100  | -1. 24167500 |
| N | 2. 42587800  | 1. 44372300  | -0. 43556100 |
| C | 3. 74314400  | 1. 40572400  | 0. 12568200  |
| C | 3. 90298300  | 1. 55406900  | 1. 50770400  |
| C | 4. 84165800  | 1. 15261700  | -0. 69528200 |
| C | 5. 18301100  | 1. 46171100  | 2. 05407500  |
| C | 6. 11686100  | 1. 06753500  | -0. 13170300 |
| H | 4. 69245200  | 1. 00355300  | -1. 75945800 |
| C | 6. 29357600  | 1. 22189700  | 1. 24128800  |
| H | 7. 28356800  | 1. 15797000  | 1. 67557500  |
| C | 7. 28325100  | 0. 78729800  | -1. 04240500 |
| C | 5. 35946900  | 1. 57554900  | 3. 54958700  |
| F | 7. 38602000  | 1. 72556900  | -2. 01064600 |



|   |             |             |             |
|---|-------------|-------------|-------------|
| F | 7.14020000  | -0.40439900 | -1.67726500 |
| F | 8.45444900  | 0.75156000  | -0.38068600 |
| F | 5.15237000  | 0.39350200  | 4.16220900  |
| F | 4.49801700  | 2.46424700  | 4.08167900  |
| F | 6.61180800  | 1.97721500  | 3.86775900  |
| S | 2.86738400  | 3.84119900  | -1.65994600 |
| H | 3.03643500  | 1.71722300  | 2.14076900  |
| H | 1.80994100  | 0.68243800  | -0.10333200 |
| H | 0.17559000  | 1.43816400  | -1.53890300 |
| C | -0.96115100 | 4.13588200  | 0.83306700  |
| H | -0.70609900 | 3.14287500  | 1.19795800  |
| H | 3.89404600  | 3.56466400  | -0.83369300 |
| H | -0.68809400 | 4.96843400  | 1.47672300  |
| N | -0.80022200 | -0.41315500 | 1.75881800  |
| S | 0.68238800  | -0.31454500 | 2.30112400  |
| O | 0.90869500  | 0.88763200  | 3.11770400  |
| O | 1.72305700  | -0.62031300 | 1.27908000  |
| C | 0.79775100  | -1.74019600 | 3.50263100  |
| F | 0.57359300  | -2.89787900 | 2.87706500  |
| F | -0.10585500 | -1.59502800 | 4.48301600  |
| F | 2.01921600  | -1.76517100 | 4.04636900  |
| C | -1.84722200 | 2.06011800  | -3.53320600 |
| C | -2.72852300 | 1.06918700  | -3.08126500 |
| C | -1.35198700 | 1.94085800  | -4.84485000 |
| C | -3.09066800 | -0.00172300 | -3.90301100 |
| H | -3.13616600 | 1.10678700  | -2.07929300 |
| C | -1.71428400 | 0.87626600  | -5.66852800 |
| H | -0.67551800 | 2.69259500  | -5.24431900 |
| C | -2.58729400 | -0.10668700 | -5.19747900 |
| H | -3.76315900 | -0.76154900 | -3.51511600 |
| H | -1.31646300 | 0.81776500  | -6.67854000 |
| H | -2.86891500 | -0.94188800 | -5.83291900 |
| C | -1.87802800 | 4.58897100  | -3.40193100 |
| H | -1.51872600 | 5.45770500  | -2.83773600 |
| H | -1.37001500 | 4.62466400  | -4.37619400 |
| C | -3.36049500 | 4.71836400  | -3.62342400 |
| C | -4.09747900 | 5.75780200  | -3.22928500 |
| H | -3.66473500 | 6.59988000  | -2.69217900 |
| H | -5.16343000 | 5.81149800  | -3.43360700 |
| H | -3.83779300 | 3.89819000  | -4.15836600 |
| H | -1.87016400 | 5.34845400  | -0.60604300 |

INT-12-6

0 imaginary frequency

H = -5236.808738

G = -5237.004814

E(M06-2X-DCM) = -5237.654317

E(M06-2X-cyclohexane) = -5237.629096

|   |             |             |             |
|---|-------------|-------------|-------------|
| C | 0.32279100  | 5.07911100  | 0.79238000  |
| C | -0.46489100 | 4.65058800  | 2.08210200  |
| H | -0.05692800 | 5.21252200  | 2.93110300  |
| H | -1.50328900 | 4.98303800  | 1.95971800  |
| C | -0.46794900 | 3.18368800  | 2.43901400  |
| C | -0.48051800 | 4.73289800  | -0.48682500 |
| H | 0.10849800  | 5.00119600  | -1.37506100 |
| H | -1.37620700 | 5.35419400  | -0.51335800 |
| N | -0.93685100 | 3.35417900  | -0.59026400 |
| C | -2.16986200 | 2.98034300  | -1.03351900 |
| N | -2.30924700 | 1.60645600  | -1.04772100 |
| C | -3.39073400 | 0.78779000  | -1.39771700 |
| C | -4.74101400 | 1.16664200  | -1.31928000 |
| C | -3.07960800 | -0.52542100 | -1.78876400 |
| C | -5.73606800 | 0.24931000  | -1.65374800 |
| C | -4.08950200 | -1.42743100 | -2.11500700 |
| H | -2.04189100 | -0.83914400 | -1.83261900 |
| C | -5.43014500 | -1.04882700 | -2.06308100 |
| H | -6.21512300 | -1.74474700 | -2.33325200 |
| C | -3.73106000 | -2.84770800 | -2.44643900 |
| C | -7.18241600 | 0.63256200  | -1.47900800 |
| F | -4.65108100 | -3.44158500 | -3.23220800 |
| F | -3.63036300 | -3.61394800 | -1.32139900 |
| F | -2.53523800 | -2.94433200 | -3.07492200 |
| F | -7.38022300 | 1.96006200  | -1.57475200 |
| F | -7.64716900 | 0.25045300  | -0.25888000 |
| F | -7.97445000 | 0.03102900  | -2.39496300 |
| S | -3.35617000 | 4.07666000  | -1.51869100 |
| H | -5.00033900 | 2.16784000  | -1.00811300 |
| C | 0.26716700  | 2.63578300  | 3.41175100  |
| H | -1.45458700 | 1.08460300  | -0.85047400 |
| H | 0.18808800  | 1.58314900  | 3.66543800  |
| H | -0.25132400 | 2.61971600  | -0.43919000 |
| H | 1.71690700  | 0.79117200  | 1.84831500  |
| O | -0.22162300 | -1.69316600 | 0.69927700  |
| O | 2.02453800  | -1.51605200 | -0.58928200 |
| P | 0.93379400  | -0.67083700 | 0.24071500  |
| O | 0.30155600  | 0.50068500  | -0.41429600 |
| C | 0.69300100  | -5.00421100 | 3.10247000  |
| C | 1.01714100  | -5.00808100 | 1.75093500  |

|   |             |             |             |
|---|-------------|-------------|-------------|
| C | 0.60896000  | -3.95741200 | 0.91407700  |
| C | -0.38861900 | -2.82381400 | 2.83940600  |
| C | -0.04636900 | -3.94210400 | 3.61941800  |
| C | 1.62340200  | -2.15758700 | -1.78835700 |
| C | 1.00735400  | -3.40340800 | -1.70700400 |
| C | 0.50074900  | -3.98071300 | -2.88393400 |
| C | 0.68607100  | -3.36708600 | -4.11693700 |
| C | 1.38353500  | -2.16275200 | -4.17732200 |
| C | 1.85656600  | -1.52016400 | -3.02100400 |
| H | -0.35145400 | -3.95192900 | 4.66114700  |
| H | 1.55642000  | -1.68245000 | -5.13564100 |
| C | 0.82217700  | -4.36761100 | -0.54002100 |
| C | 2.04966900  | -5.32350300 | -0.37816500 |
| H | 2.15793100  | -6.00997400 | -1.22352000 |
| H | 2.96165500  | -4.71885800 | -0.31360500 |
| H | -1.19276100 | -5.32295300 | -3.11007200 |
| H | 0.35266800  | -6.14094500 | -2.87352100 |
| C | 0.01105100  | -2.84078600 | 1.48985700  |
| H | 0.99436000  | -5.82442000 | 3.74881700  |
| H | 0.29325600  | -3.81729900 | -5.02462600 |
| C | 1.80101100  | -6.03930200 | 0.96814000  |
| H | 1.22498600  | -6.96478900 | 0.83198600  |
| H | 2.73225900  | -6.31948000 | 1.47295200  |
| C | -0.23781600 | -5.26254300 | -2.57843100 |
| C | -0.41745100 | -5.18282700 | -1.04992200 |
| H | -0.49596000 | -6.16117900 | -0.56746300 |
| H | -1.33080700 | -4.62377100 | -0.82367600 |
| C | 2.60637700  | -0.23387200 | -3.18537600 |
| C | 4.01911900  | -0.23555600 | -3.08894000 |
| C | 1.91575900  | 0.94123300  | -3.56712600 |
| C | 4.77514100  | -1.40743100 | -2.76486500 |
| C | 4.75289100  | 0.97968700  | -3.36181100 |
| C | 2.66305000  | 2.14778100  | -3.84418100 |
| C | 6.14328500  | -1.37583900 | -2.68763400 |
| H | 4.24837900  | -2.33718300 | -2.58115400 |
| C | 6.17971500  | 0.97155900  | -3.26338600 |
| C | 4.05639900  | 2.13414300  | -3.73278100 |
| C | 6.85928400  | -0.16984200 | -2.93332800 |
| H | 6.69079700  | -2.28125300 | -2.44000700 |
| H | 6.71412400  | 1.89687100  | -3.46519700 |
| H | 4.61391900  | 3.04385800  | -3.94668900 |
| H | 7.94363700  | -0.16389800 | -2.86564400 |
| C | -1.19038400 | -1.72251100 | 3.45817900  |
| C | -2.51207100 | -1.47253900 | 3.00638500  |

|   |             |             |             |
|---|-------------|-------------|-------------|
| C | -0.66916200 | -1.00697400 | 4.56664500  |
| C | -3.12506200 | -2.19701400 | 1.93460700  |
| C | -3.31076400 | -0.46161700 | 3.66356400  |
| C | -1.49748800 | -0.03005200 | 5.23877000  |
| C | -4.39930600 | -1.91495500 | 1.51696400  |
| H | -2.57155800 | -2.98963200 | 1.44499700  |
| C | -4.63032000 | -0.18655800 | 3.18466500  |
| C | -2.78660900 | 0.22177200  | 4.76354500  |
| C | -5.16196300 | -0.88372500 | 2.13424500  |
| H | -4.82754700 | -2.48171000 | 0.69714800  |
| H | -5.20197000 | 0.59576900  | 3.67818300  |
| H | -3.39855600 | 0.97015300  | 5.26281400  |
| H | -6.15385900 | -0.65143400 | 1.75848300  |
| C | -0.14677100 | 2.15303400  | -4.07347700 |
| H | -1.22945700 | 2.17337200  | -4.15672000 |
| C | 0.49026300  | 0.99885600  | -3.69896900 |
| H | -0.08969300 | 0.10648500  | -3.49409600 |
| C | 0.59530000  | 3.33890400  | -4.34420600 |
| H | 0.07009200  | 4.24306100  | -4.63823000 |
| C | 1.95976300  | 3.33220900  | -4.23179600 |
| H | 2.53867000  | 4.22951400  | -4.43717000 |
| C | 1.13481500  | -0.48038700 | 6.13337400  |
| H | 2.15731200  | -0.62971400 | 6.46812700  |
| C | 0.30282900  | 0.45606000  | 6.80950100  |
| H | 0.68982900  | 1.00138500  | 7.66586800  |
| C | -0.97425200 | 0.67425900  | 6.36819400  |
| H | -1.61737200 | 1.39766300  | 6.86361200  |
| C | 0.66658800  | -1.18701500 | 5.05539900  |
| H | 1.32100700  | -1.88997100 | 4.55376000  |
| N | 1.89157500  | -0.16985800 | 1.54333800  |
| S | 3.24205000  | -0.84573300 | 2.29873700  |
| C | 4.63859000  | -0.70912100 | 1.02319000  |
| O | 3.03816600  | -2.27264400 | 2.49750200  |
| O | 3.57772700  | 0.07634900  | 3.37397300  |
| F | 5.76536100  | -0.48980000 | 1.69864300  |
| F | 4.73873700  | -1.84980300 | 0.35085300  |
| F | 4.41225800  | 0.30039100  | 0.18814700  |
| H | -1.14818000 | 2.54789400  | 1.87664000  |
| H | 0.95318200  | 3.22463500  | 4.01621500  |
| C | 1.74840900  | 4.50120200  | 0.81324200  |
| C | 2.57427000  | 4.73045800  | 1.92938400  |
| C | 2.29583000  | 3.77010100  | -0.24930700 |
| C | 3.87787100  | 4.24457100  | 1.98916400  |
| H | 2.19414600  | 5.29606900  | 2.77521300  |

|   |             |            |             |
|---|-------------|------------|-------------|
| C | 3.60465000  | 3.27890100 | -0.19507000 |
| H | 1.71616900  | 3.57316500 | -1.14497200 |
| C | 4.40110500  | 3.50921400 | 0.92372900  |
| H | 4.48349200  | 4.43739400 | 2.87091100  |
| H | 3.99258400  | 2.71314800 | -1.03582900 |
| H | 5.41490300  | 3.12062900 | 0.96733000  |
| C | 0.47214300  | 6.64721600 | 0.78521100  |
| H | 1.12879700  | 6.92013500 | 1.62112200  |
| H | 1.00734200  | 6.93231800 | -0.12960000 |
| C | -0.80073800 | 7.44523800 | 0.88833100  |
| H | -1.37236100 | 7.33602700 | 1.81002700  |
| C | -1.24928700 | 8.28483200 | -0.04647100 |
| H | -0.71586900 | 8.43623500 | -0.98300400 |
| H | -2.16637600 | 8.85231300 | 0.08582400  |

TS-EF-3SS

l imaginary frequency

H = -5236.781225

G = -5236.975533

E(M06-2X-DCM) = -5237.626868

E(M06-2X-cyclohexane) = -5237.599540

|   |             |             |             |
|---|-------------|-------------|-------------|
| O | -0.64170300 | -2.60455500 | -0.68051100 |
| O | -2.74045000 | -1.07977100 | -0.57933600 |
| P | -1.12953700 | -1.09465100 | -0.27849800 |
| O | -0.49557800 | -0.04266900 | -1.13948600 |
| C | -1.05194600 | -3.63497300 | -4.72098000 |
| C | -2.11367400 | -3.78485600 | -3.83490600 |
| C | -1.94475200 | -3.51047800 | -2.47024800 |
| C | 0.36701000  | -2.84780800 | -2.88475000 |
| C | 0.18023300  | -3.19991400 | -4.23342600 |
| C | -3.57948900 | -1.98989700 | 0.07126100  |
| C | -3.65639000 | -3.30570200 | -0.39103400 |
| C | -4.36174200 | -4.25660200 | 0.36443200  |
| C | -5.07339500 | -3.88132000 | 1.49780300  |
| C | -5.09275600 | -2.53751000 | 1.86592900  |
| C | -4.34886500 | -1.56662700 | 1.17444100  |
| H | 1.02415100  | -3.10352500 | -4.91012000 |
| H | -5.68244900 | -2.21918900 | 2.72055700  |
| C | -3.17829000 | -3.94770400 | -1.69256600 |
| C | -4.26726800 | -3.82563000 | -2.81285800 |
| H | -4.59294700 | -2.78072100 | -2.87343000 |
| H | -5.14982600 | -4.43916100 | -2.60670800 |
| H | -5.13045600 | -5.95988400 | -0.73513100 |
| H | -3.98205100 | -6.39792700 | 0.52506400  |

|   |             |             |             |
|---|-------------|-------------|-------------|
| C | -0.73554800 | -2.98778800 | -2.02048500 |
| H | -1.17258700 | -3.85681400 | -5.77840200 |
| H | -5.62104800 | -4.61694600 | 2.08140100  |
| C | -3.53610000 | -4.21819400 | -4.11573700 |
| H | -3.95811600 | -3.72872100 | -5.00095700 |
| H | -3.59436700 | -5.30069900 | -4.29707100 |
| C | -4.20752700 | -5.63839600 | -0.23221700 |
| C | -3.05580100 | -5.44097400 | -1.23953000 |
| H | -2.09333900 | -5.57581600 | -0.73291800 |
| H | -3.08979500 | -6.13689400 | -2.08357100 |
| C | -4.49391900 | -0.13971800 | 1.61098500  |
| C | -4.00163100 | 0.27387600  | 2.87286700  |
| C | -5.26594200 | 0.75165100  | 0.82331200  |
| C | -3.20669000 | -0.57633500 | 3.70583300  |
| C | -4.29486100 | 1.60510700  | 3.35720500  |
| C | -5.55335700 | 2.07961400  | 1.32003900  |
| C | -2.74476700 | -0.15118000 | 4.92315200  |
| H | -2.93889300 | -1.55879700 | 3.34143100  |
| C | -3.80181800 | 2.00593900  | 4.63903200  |
| C | -5.06281600 | 2.46887400  | 2.57070300  |
| C | -3.05166200 | 1.15354300  | 5.40320000  |
| H | -2.11763700 | -0.80879300 | 5.51717400  |
| H | -4.04050900 | 3.00661600  | 4.99258400  |
| H | -5.30172600 | 3.46139800  | 2.94951700  |
| H | -2.67983600 | 1.47047000  | 6.37394000  |
| C | 1.71254500  | -2.37462200 | -2.43611900 |
| C | 2.25609900  | -1.18397300 | -2.98094800 |
| C | 2.47647400  | -3.15778500 | -1.53543700 |
| C | 1.51478300  | -0.31421000 | -3.84647900 |
| C | 3.61027500  | -0.79931800 | -2.65076900 |
| C | 3.80846300  | -2.73101000 | -1.17184900 |
| C | 2.08022000  | 0.81521100  | -4.37990500 |
| H | 0.48142000  | -0.55505900 | -4.06495000 |
| C | 4.16855400  | 0.38044000  | -3.23957400 |
| C | 4.34512000  | -1.57867300 | -1.75304300 |
| C | 3.42969700  | 1.16419200  | -4.08502000 |
| H | 1.49333900  | 1.45451900  | -5.03462400 |
| H | 5.19336600  | 0.64605400  | -2.99113100 |
| H | 5.35955700  | -1.27962700 | -1.49784300 |
| H | 3.86571700  | 2.05522500  | -4.52943900 |
| C | -6.57552000 | 1.26673600  | -1.17815300 |
| H | -6.97702000 | 0.96212500  | -2.14065600 |
| C | -5.81731200 | 0.38889900  | -0.44786400 |
| H | -5.62906300 | -0.60596700 | -0.83419100 |

|   |             |             |             |
|---|-------------|-------------|-------------|
| C | -6.84947200 | 2.57462600  | -0.68694200 |
| H | -7.45974600 | 3.25478400  | -1.27502900 |
| C | -6.35426200 | 2.96348300  | 0.52930500  |
| H | -6.57248600 | 3.95274400  | 0.92646400  |
| C | 2.75611100  | -5.10281600 | -0.08296800 |
| H | 2.36443900  | -6.02652000 | 0.33457100  |
| C | 4.05032500  | -4.65340000 | 0.30354100  |
| H | 4.62857100  | -5.22829100 | 1.02166500  |
| C | 4.56154300  | -3.50322600 | -0.23283800 |
| H | 5.54386800  | -3.14343400 | 0.06016200  |
| C | 1.99953100  | -4.38344100 | -0.97012700 |
| H | 1.01843200  | -4.74588800 | -1.25358100 |
| C | -1.62290300 | 3.79518500  | -0.59110800 |
| C | -1.68073700 | 3.95667400  | 0.97435800  |
| H | -1.39595100 | 4.98099000  | 1.23918500  |
| H | -2.72871800 | 3.82401200  | 1.28158900  |
| C | -0.87690200 | 2.99879600  | 1.78091100  |
| C | -0.15223700 | 3.61440900  | -1.03351900 |
| H | 0.42813800  | 4.50180400  | -0.78397600 |
| H | -0.12378800 | 3.47952000  | -2.12022800 |
| N | 0.54801000  | 2.46082500  | -0.44417100 |
| C | 1.80154300  | 2.51352900  | 0.04469200  |
| N | 2.50684200  | 1.36748800  | 0.11676400  |
| C | 3.88280600  | 1.26359100  | 0.47154400  |
| C | 4.83005500  | 2.02888200  | -0.20991300 |
| C | 4.28935600  | 0.33271900  | 1.43271200  |
| C | 6.18513600  | 1.87721900  | 0.08216400  |
| C | 5.64862500  | 0.19312200  | 1.71236400  |
| H | 3.54845400  | -0.27834900 | 1.93332600  |
| C | 6.60406000  | 0.96370900  | 1.04711500  |
| H | 7.65756500  | 0.85201900  | 1.27567300  |
| C | 6.11863800  | -0.83735700 | 2.70651400  |
| C | 7.19081400  | 2.63899100  | -0.73818200 |
| F | 7.10528500  | -0.34907300 | 3.49187600  |
| F | 6.63270400  | -1.92620000 | 2.07866100  |
| F | 5.12905300  | -1.26722500 | 3.50818000  |
| F | 7.38056400  | 2.04745200  | -1.94646800 |
| F | 8.39565000  | 2.70418300  | -0.13731600 |
| F | 6.78402900  | 3.90197200  | -0.98625300 |
| S | 2.39670800  | 3.98173800  | 0.77079900  |
| H | 4.51539000  | 2.71889000  | -0.98342500 |
| H | 2.01048800  | 0.47665600  | 0.01146100  |
| H | 0.20445300  | 1.52800900  | -0.75002600 |
| C | 0.07845500  | 3.41996600  | 2.69077300  |

|   |             |             |             |
|---|-------------|-------------|-------------|
| H | 0.00243400  | 4.43929400  | 3.07701100  |
| H | 1.10484400  | 3.71933000  | 1.85164400  |
| H | 0.50437300  | 2.67573600  | 3.36138200  |
| N | -1.01299700 | -0.99189900 | 1.33140000  |
| S | 0.36196200  | -0.98728900 | 2.11432100  |
| O | 0.38630000  | 0.03967700  | 3.16753700  |
| O | 1.56243400  | -1.08594700 | 1.24187400  |
| C | 0.35526900  | -2.61527300 | 3.03141700  |
| F | 0.26786400  | -3.63156200 | 2.17120900  |
| F | -0.68452900 | -2.67547100 | 3.87838900  |
| F | 1.48552400  | -2.73046100 | 3.73569200  |
| H | -1.03850800 | 1.93013400  | 1.65603100  |
| C | -2.19468900 | 5.09345700  | -1.20096300 |
| C | -3.49624400 | 5.49793400  | -0.85540000 |
| C | -1.48020200 | 5.91265200  | -2.08703500 |
| C | -4.05523100 | 6.66814000  | -1.36451200 |
| H | -4.09404800 | 4.88802100  | -0.18436100 |
| C | -2.03850000 | 7.08592600  | -2.60211600 |
| H | -0.47610200 | 5.65120000  | -2.40063100 |
| C | -3.32695000 | 7.47239900  | -2.24282500 |
| H | -5.06417000 | 6.94985500  | -1.07448700 |
| H | -1.45628500 | 7.69501200  | -3.28851900 |
| H | -3.76031100 | 8.38522700  | -2.64211900 |
| C | -2.50679500 | 2.58351100  | -1.03638300 |
| H | -3.54416100 | 2.80921100  | -0.77557700 |
| H | -2.22626100 | 1.70000800  | -0.45615500 |
| C | -2.41870000 | 2.24104700  | -2.50302000 |
| H | -1.57433800 | 1.62125300  | -2.79972300 |
| C | -3.31011600 | 2.61487600  | -3.42232700 |
| H | -3.20413200 | 2.33135200  | -4.46655600 |
| H | -4.18406700 | 3.20953100  | -3.16621400 |

TS-EF-3SS-1

l imaginary frequency

H = -5236.781225

G = -5236.975534

E(M06-2X-DCM) = -5237.626868

E(M06-2X-cyclohexane) = -5237.599541

|   |             |             |             |
|---|-------------|-------------|-------------|
| O | -0.64169400 | -2.60456500 | -0.68051100 |
| O | -2.74043100 | -1.07976800 | -0.57933800 |
| P | -1.12951800 | -1.09465800 | -0.27849800 |
| O | -0.49555000 | -0.04268300 | -1.13949000 |
| C | -1.05191900 | -3.63496600 | -4.72098600 |
| C | -2.11365500 | -3.78484200 | -3.83491900 |



|   |             |             |             |
|---|-------------|-------------|-------------|
| C | -1.94473800 | -3.51047100 | -2.47026000 |
| C | 0.36703300  | -2.84782100 | -2.88474400 |
| C | 0.18026100  | -3.19992100 | -4.23342200 |
| C | -3.57947700 | -1.98989200 | 0.07125100  |
| C | -3.65638500 | -3.30569500 | -0.39105300 |
| C | -4.36174600 | -4.25659600 | 0.36440400  |
| C | -5.07340000 | -3.88131700 | 1.49777600  |
| C | -5.09275300 | -2.53751000 | 1.86591200  |
| C | -4.34885400 | -1.56662700 | 1.17443300  |
| H | 1.02418400  | -3.10353700 | -4.91011100 |
| H | -5.68244600 | -2.21919200 | 2.72054000  |
| C | -3.17828400 | -3.94769200 | -1.69258700 |
| C | -4.26725500 | -3.82560300 | -2.81288400 |
| H | -4.59292600 | -2.78069100 | -2.87345100 |
| H | -5.14981900 | -4.43912800 | -2.60674200 |
| H | -5.13046800 | -5.95986300 | -0.73517400 |
| H | -3.98207200 | -6.39792400 | 0.52502300  |
| C | -0.73553200 | -2.98779300 | -2.02048600 |
| H | -1.17255500 | -3.85680200 | -5.77841000 |
| H | -5.62106000 | -4.61694300 | 2.08136600  |
| C | -3.53608300 | -4.21816500 | -4.11576100 |
| H | -3.95808900 | -3.72868300 | -5.00098100 |
| H | -3.59435900 | -5.30066900 | -4.29710200 |
| C | -4.20753900 | -5.63838600 | -0.23225400 |
| C | -3.05580700 | -5.44096500 | -1.23956000 |
| H | -2.09334900 | -5.57581800 | -0.73294500 |
| H | -3.08980300 | -6.13688000 | -2.08360700 |
| C | -4.49390200 | -0.13972000 | 1.61099000  |
| C | -4.00161200 | 0.27385800  | 2.87287600  |
| C | -5.26592400 | 0.75165800  | 0.82332700  |
| C | -3.20667400 | -0.57636400 | 3.70583300  |
| C | -4.29484000 | 1.60508400  | 3.35722900  |
| C | -5.55333800 | 2.07961500  | 1.32007000  |
| C | -2.74475100 | -0.15122400 | 4.92315700  |
| H | -2.93887900 | -1.55882200 | 3.34142100  |
| C | -3.80179700 | 2.00590200  | 4.63906200  |
| C | -5.06279500 | 2.46886100  | 2.57073700  |
| C | -3.05164200 | 1.15349500  | 5.40322000  |
| H | -2.11762300 | -0.80884400 | 5.51717200  |
| H | -4.04048500 | 3.00657500  | 4.99262400  |
| H | -5.30170400 | 3.46138100  | 2.94956300  |
| H | -2.67981600 | 1.47041000  | 6.37396400  |
| C | 1.71256900  | -2.37464800 | -2.43610300 |
| C | 2.25613800  | -1.18400600 | -2.98093200 |

|   |              |              |              |
|---|--------------|--------------|--------------|
| C | 2. 47648400  | -3. 15781600 | -1. 53541400 |
| C | 1. 51483800  | -0. 31423600 | -3. 84646900 |
| C | 3. 61031700  | -0. 79936500 | -2. 65074600 |
| C | 3. 80847400  | -2. 73105300 | -1. 17181700 |
| C | 2. 08029000  | 0. 81517700  | -4. 37989500 |
| H | 0. 48147200  | -0. 55507300 | -4. 06494300 |
| C | 4. 16861300  | 0. 38038400  | -3. 23955300 |
| C | 4. 34514700  | -1. 57872300 | -1. 75301000 |
| C | 3. 42977000  | 1. 16414100  | -4. 08500600 |
| H | 1. 49341900  | 1. 45449000  | -5. 03461800 |
| H | 5. 19342700  | 0. 64598700  | -2. 99110700 |
| H | 5. 35958500  | -1. 27968700 | -1. 49780400 |
| H | 3. 86580300  | 2. 05516700  | -4. 52942700 |
| C | -6. 57550700 | 1. 26676600  | -1. 17812800 |
| H | -6. 97700800 | 0. 96216600  | -2. 14063400 |
| C | -5. 81729600 | 0. 38892000  | -0. 44785200 |
| H | -5. 62904800 | -0. 60594100 | -0. 83419000 |
| C | -6. 84945800 | 2. 57465000  | -0. 68690100 |
| H | -7. 45973300 | 3. 25481500  | -1. 27497900 |
| C | -6. 35424500 | 2. 96349300  | 0. 52934800  |
| H | -6. 57246900 | 3. 95274900  | 0. 92652000  |
| C | 2. 75609200  | -5. 10284700 | -0. 08293800 |
| H | 2. 36440900  | -6. 02654600 | 0. 33460000  |
| C | 4. 05030700  | -4. 65344200 | 0. 30358000  |
| H | 4. 62854300  | -5. 22833600 | 1. 02170900  |
| C | 4. 56153900  | -3. 50327400 | -0. 23279800 |
| H | 5. 54386600  | -3. 14348900 | 0. 06020700  |
| C | 1. 99952500  | -4. 38346700 | -0. 97010500 |
| H | 1. 01842600  | -4. 74590600 | -1. 25356600 |
| C | -1. 62293500 | 3. 79517700  | -0. 59112700 |
| C | -1. 68077500 | 3. 95666500  | 0. 97433700  |
| H | -1. 39599100 | 4. 98098100  | 1. 23916700  |
| H | -2. 72875700 | 3. 82400300  | 1. 28156500  |
| C | -0. 87694100 | 2. 99878700  | 1. 78089100  |
| C | -0. 15226800 | 3. 61441600  | -1. 03353200 |
| H | 0. 42810100  | 4. 50181200  | -0. 78397700 |
| H | -0. 12381100 | 3. 47953800  | -2. 12024100 |
| N | 0. 54798400  | 2. 46083200  | -0. 44418900 |
| C | 1. 80151500  | 2. 51354000  | 0. 04467600  |
| N | 2. 50682400  | 1. 36750500  | 0. 11673200  |
| C | 3. 88278800  | 1. 26361800  | 0. 47152300  |
| C | 4. 83003500  | 2. 02890700  | -0. 20994100 |
| C | 4. 28933800  | 0. 33276800  | 1. 43271100  |
| C | 6. 18511500  | 1. 87726100  | 0. 08214800  |

|   |             |             |             |
|---|-------------|-------------|-------------|
| C | 5.64860800  | 0.19318800  | 1.71237500  |
| H | 3.54843600  | -0.27829500 | 1.93333100  |
| C | 6.60404000  | 0.96377100  | 1.04711900  |
| H | 7.65754400  | 0.85209500  | 1.27568700  |
| C | 6.11861400  | -0.83727400 | 2.70654600  |
| C | 7.19079400  | 2.63902600  | -0.73820200 |
| F | 7.10533300  | -0.34901400 | 3.49183200  |
| F | 6.63257600  | -1.92617900 | 2.07871700  |
| F | 5.12904500  | -1.26704200 | 3.50828600  |
| F | 7.38059300  | 2.04744300  | -1.94645900 |
| F | 8.39561200  | 2.70427200  | -0.13730700 |
| F | 6.78398400  | 3.90198600  | -0.98633500 |
| S | 2.39667000  | 3.98174300  | 0.77080500  |
| H | 4.51536800  | 2.71890000  | -0.98346500 |
| H | 2.01048300  | 0.47667200  | 0.01138300  |
| H | 0.20443300  | 1.52801300  | -0.75004200 |
| C | 0.07840700  | 3.41995700  | 2.69076200  |
| H | 0.00238100  | 4.43928500  | 3.07700100  |
| H | 1.10480200  | 3.71932900  | 1.85163700  |
| H | 0.50432600  | 2.67572700  | 3.36136900  |
| N | -1.01298100 | -0.99190400 | 1.33139900  |
| S | 0.36197700  | -0.98729800 | 2.11432600  |
| O | 0.38630800  | 0.03966200  | 3.16754700  |
| O | 1.56245100  | -1.08595300 | 1.24188400  |
| C | 0.35527700  | -2.61528800 | 3.03141400  |
| F | 0.26787400  | -3.63157200 | 2.17120100  |
| F | -0.68452500 | -2.67549000 | 3.87838200  |
| F | 1.48552800  | -2.73048100 | 3.73569300  |
| H | -1.03853800 | 1.93012500  | 1.65600300  |
| C | -2.19473200 | 5.09344500  | -1.20098400 |
| C | -3.49629900 | 5.49789900  | -0.85543800 |
| C | -1.48024200 | 5.91265900  | -2.08703600 |
| C | -4.05529600 | 6.66810100  | -1.36454900 |
| H | -4.09410500 | 4.88797000  | -0.18441500 |
| C | -2.03855000 | 7.08592900  | -2.60211500 |
| H | -0.47613300 | 5.65122600  | -2.40061700 |
| C | -3.32701300 | 7.47237900  | -2.24284300 |
| H | -5.06424300 | 6.94979800  | -1.07453800 |
| H | -1.45633300 | 7.69503100  | -3.28850300 |
| H | -3.76038000 | 8.38520400  | -2.64213500 |
| C | -2.50681300 | 2.58349400  | -1.03640800 |
| H | -3.54418500 | 2.80919000  | -0.77562400 |
| H | -2.22628600 | 1.69999900  | -0.45616600 |
| C | -2.41868700 | 2.24101700  | -2.50304000 |

|   |             |            |             |
|---|-------------|------------|-------------|
| H | -1.57433500 | 1.62119500 | -2.79971300 |
| C | -3.31006500 | 2.61486900 | -3.42237600 |
| H | -3.20405800 | 2.33133500 | -4.46660000 |
| H | -4.18400200 | 3.20955500 | -3.16629300 |

TS-EF-3SS-2

1 imaginary frequency

H = -5236.776152

G = -5236.971133

E(M06-2X-DCM) = -5237.618648

E(M06-2X-cyclohexane) = -5237.590276

|   |             |             |             |
|---|-------------|-------------|-------------|
| O | -1.17350400 | -2.61418100 | -0.26415900 |
| O | -2.82801700 | -0.72772000 | 0.39365000  |
| P | -1.24503100 | -1.01293100 | 0.07381300  |
| O | -0.90258700 | -0.15610500 | -1.11003600 |
| C | -3.20187600 | -3.87434800 | -3.69880300 |
| C | -3.87069200 | -3.74093600 | -2.48594800 |
| C | -3.16995800 | -3.39616000 | -1.32089300 |
| C | -1.10466400 | -3.22147200 | -2.61554600 |
| C | -1.82580700 | -3.64538000 | -3.74505200 |
| C | -3.47448500 | -1.42051100 | 1.41862900  |
| C | -3.93650400 | -2.71704100 | 1.18568300  |
| C | -4.44789600 | -3.45972300 | 2.26285500  |
| C | -4.60076400 | -2.88352000 | 3.51892400  |
| C | -4.23956900 | -1.54894400 | 3.70001900  |
| C | -3.66003300 | -0.79362300 | 2.66804500  |
| H | -1.29001500 | -3.76902700 | -4.68175400 |
| H | -4.38344400 | -1.07521300 | 4.66673000  |
| C | -4.08166400 | -3.52556800 | -0.10506100 |
| C | -5.47309600 | -3.27642600 | -0.78095700 |
| H | -5.63149000 | -2.19546600 | -0.87273000 |
| H | -6.30210600 | -3.68568300 | -0.19523500 |
| H | -5.83535600 | -5.04133800 | 1.73468000  |
| H | -4.39218300 | -5.61915800 | 2.56087100  |
| C | -1.81694900 | -3.07967100 | -1.40832800 |
| H | -3.73786500 | -4.15537800 | -4.60195700 |
| H | -5.00141900 | -3.45897400 | 4.34961800  |
| C | -5.34525400 | -3.90546400 | -2.18662100 |
| H | -5.98252800 | -3.41246300 | -2.92970600 |
| H | -5.63500000 | -4.96558900 | -2.17816400 |
| C | -4.75309200 | -4.87922200 | 1.83747100  |
| C | -4.03627600 | -4.97950800 | 0.47482800  |
| H | -2.98871800 | -5.26283200 | 0.62793200  |
| H | -4.48571900 | -5.71296300 | -0.20184200 |

|   |             |             |             |
|---|-------------|-------------|-------------|
| C | -3.31132000 | 0.64047700  | 2.92755600  |
| C | -2.26581200 | 0.97003300  | 3.82444000  |
| C | -4.09949800 | 1.66606900  | 2.34788900  |
| C | -1.43901900 | -0.01909600 | 4.44609800  |
| C | -1.99510700 | 2.35796500  | 4.12955600  |
| C | -3.80512900 | 3.05046200  | 2.64548200  |
| C | -0.44052800 | 0.33138400  | 5.31507900  |
| H | -1.58713100 | -1.05965500 | 4.18936900  |
| C | -0.94770000 | 2.68034400  | 5.04878200  |
| C | -2.76105100 | 3.35803700  | 3.52300600  |
| C | -0.19445300 | 1.69738200  | 5.63039700  |
| H | 0.18982000  | -0.43999900 | 5.74666400  |
| H | -0.76483100 | 3.72868200  | 5.27419800  |
| H | -2.55532300 | 4.40085700  | 3.75870600  |
| H | 0.60266400  | 1.95403800  | 6.32276000  |
| C | 0.36231300  | -2.94469300 | -2.72250300 |
| C | 0.82385800  | -1.89226000 | -3.55283800 |
| C | 1.29077000  | -3.76213200 | -2.03141900 |
| C | -0.05804400 | -1.01852200 | -4.26863000 |
| C | 2.24495300  | -1.66307700 | -3.69324300 |
| C | 2.70610900  | -3.49357400 | -2.14684700 |
| C | 0.42278900  | -0.03326600 | -5.09330000 |
| H | -1.12712900 | -1.14355600 | -4.14721900 |
| C | 2.70490200  | -0.62002100 | -4.55808400 |
| C | 3.14512100  | -2.46117000 | -2.98049000 |
| C | 1.82461900  | 0.16889500  | -5.24837000 |
| H | -0.27333200 | 0.59989300  | -5.63827400 |
| H | 3.77783600  | -0.47271700 | -4.65874100 |
| H | 4.21369300  | -2.27922200 | -3.07961300 |
| H | 2.18884400  | 0.94982800  | -5.91075200 |
| C | -5.97467000 | 2.41030200  | 0.96422400  |
| H | -6.82591200 | 2.17446400  | 0.33170300  |
| C | -5.21999700 | 1.39780600  | 1.49708700  |
| H | -5.47833600 | 0.36637400  | 1.28549100  |
| C | -5.66044200 | 3.77251800  | 1.23514600  |
| H | -6.26972700 | 4.56244100  | 0.80397200  |
| C | -4.60622900 | 4.07854500  | 2.05444500  |
| H | -4.37020400 | 5.11383900  | 2.29189300  |
| C | 1.81717600  | -5.63243600 | -0.55074200 |
| H | 1.48640200  | -6.46885100 | 0.05911900  |
| C | 3.20674200  | -5.33485700 | -0.63530500 |
| H | 3.92111000  | -5.93618700 | -0.07980100 |
| C | 3.63645100  | -4.29691100 | -1.41609800 |
| H | 4.69310800  | -4.05125900 | -1.48312500 |

|   |             |             |             |
|---|-------------|-------------|-------------|
| C | 0.89476400  | -4.87426100 | -1.22240500 |
| H | -0.15858800 | -5.11802700 | -1.14541600 |
| C | -1.48653500 | 3.29855300  | -2.16774600 |
| C | -1.76174800 | 3.06124500  | -0.65724600 |
| H | -2.72986400 | 3.50041100  | -0.37358300 |
| H | -1.89585200 | 1.98853300  | -0.50326000 |
| C | -0.74271000 | 3.54270500  | 0.31759100  |
| C | 0.01171500  | 2.92861800  | -2.47516000 |
| H | 0.61275700  | 3.82754000  | -2.59425000 |
| H | 0.05963500  | 2.36667300  | -3.41498600 |
| N | 0.66416400  | 2.10179600  | -1.45248200 |
| C | 1.93511300  | 2.28623700  | -1.03315300 |
| N | 2.57273100  | 1.21207300  | -0.53942300 |
| C | 3.88593100  | 1.11068800  | 0.00173500  |
| C | 4.39965300  | 1.98373000  | 0.96230300  |
| C | 4.64151400  | 0.01631700  | -0.42445000 |
| C | 5.68867400  | 1.77512900  | 1.45335000  |
| C | 5.92134500  | -0.18921800 | 0.08689100  |
| H | 4.21895800  | -0.67368500 | -1.14576500 |
| C | 6.45851000  | 0.69379400  | 1.02196800  |
| H | 7.45541200  | 0.53821600  | 1.41628600  |
| C | 6.69410200  | -1.40506300 | -0.35316000 |
| C | 6.27584600  | 2.75889400  | 2.43215900  |
| F | 6.30410400  | -2.51675600 | 0.30837000  |
| F | 8.02016900  | -1.26280200 | -0.15019300 |
| F | 6.51135700  | -1.65945800 | -1.67399100 |
| F | 6.95266200  | 3.74383800  | 1.79634100  |
| F | 7.14802300  | 2.16546300  | 3.27545800  |
| F | 5.32358000  | 3.35535200  | 3.18023500  |
| S | 2.63363800  | 3.87426100  | -1.05168500 |
| H | 3.80309500  | 2.80443300  | 1.33420000  |
| H | 2.08834000  | 0.30304500  | -0.54845600 |
| H | 0.23517100  | 1.16507400  | -1.31892800 |
| C | -0.00241900 | 4.72334500  | 0.27335400  |
| H | -0.32988500 | 5.51408000  | -0.40155400 |
| H | 1.12330100  | 4.38766000  | -0.31417900 |
| H | 0.41936400  | 5.06585000  | 1.21952000  |
| N | -0.47913500 | -0.82606200 | 1.48065800  |
| S | 1.08221800  | -1.04729100 | 1.66211600  |
| O | 1.67279600  | -0.05377000 | 2.56465700  |
| O | 1.80032900  | -1.31662900 | 0.38468900  |
| C | 1.20123100  | -2.66544200 | 2.59139100  |
| F | 0.60094600  | -2.55621500 | 3.78759100  |
| F | 2.48747600  | -2.97154800 | 2.78660500  |

|   |             |             |             |
|---|-------------|-------------|-------------|
| F | 0.61550300  | -3.65119100 | 1.90821700  |
| C | -1.77057800 | 4.72986000  | -2.66059900 |
| C | -1.27741600 | 5.13720200  | -3.91356900 |
| C | -2.56411400 | 5.64568700  | -1.95326800 |
| C | -1.54680400 | 6.40456000  | -4.42765900 |
| H | -0.67400200 | 4.45480600  | -4.50612300 |
| C | -2.83640100 | 6.91760400  | -2.46484500 |
| H | -2.98509800 | 5.37992800  | -0.98904400 |
| C | -2.32792600 | 7.30561700  | -3.70273200 |
| H | -1.14495300 | 6.68610000  | -5.39730900 |
| H | -3.45095400 | 7.60349200  | -1.88766000 |
| H | -2.53870700 | 8.29477000  | -4.09939000 |
| C | -2.39456400 | 2.30341900  | -2.97668400 |
| H | -2.14139100 | 2.43507200  | -4.03875700 |
| H | -2.11060600 | 1.28324000  | -2.69645100 |
| C | -3.87629400 | 2.48568600  | -2.80457600 |
| C | -4.68682600 | 1.55982300  | -2.28867800 |
| H | -4.30769900 | 0.60732800  | -1.92518100 |
| H | -5.75747300 | 1.72524000  | -2.20382800 |
| H | -4.29410100 | 3.43225000  | -3.14780400 |
| H | -0.57534800 | 2.88546800  | 1.17141000  |

TS-EF-3SS-3

l imaginary frequency

H = -5236.774664

G = -5236.970648

E(M06-2X-DCM) = -5237.619682

E(M06-2X-cyclohexane) = -5237.591132

|   |            |             |             |
|---|------------|-------------|-------------|
| O | 1.07380000 | -2.44144600 | 0.94970200  |
| O | 2.99128100 | -0.80546700 | 0.34201900  |
| P | 1.36268200 | -0.97004200 | 0.28908200  |
| O | 0.76058600 | 0.14985300  | 1.08003000  |
| C | 2.14589400 | -2.88356200 | 4.97168800  |
| C | 3.07636900 | -3.09171300 | 3.95836800  |
| C | 2.69043100 | -3.01500700 | 2.61267900  |
| C | 0.42007600 | -2.43236900 | 3.29317300  |
| C | 0.82583100 | -2.58632100 | 4.63024200  |
| C | 3.80177200 | -1.73694800 | -0.31464100 |
| C | 4.05546300 | -2.97305700 | 0.28336200  |
| C | 4.71760400 | -3.96584200 | -0.45758400 |
| C | 5.21670500 | -3.69558500 | -1.72657500 |
| C | 5.07108800 | -2.41119100 | -2.24926400 |
| C | 4.36255100 | -1.40969900 | -1.56626900 |
| H | 0.08536900 | -2.44446800 | 5.41214900  |

|   |              |              |              |
|---|--------------|--------------|--------------|
| H | 5. 50022600  | -2. 16799100 | -3. 21697000 |
| C | 3. 82916900  | -3. 47123700 | 1. 71089700  |
| C | 5. 05509100  | -3. 13496200 | 2. 62781300  |
| H | 5. 30018200  | -2. 07299000 | 2. 51083100  |
| H | 5. 94556200  | -3. 71429300 | 2. 36451700  |
| H | 5. 78097300  | -5. 45847500 | 0. 70152400  |
| H | 4. 49988200  | -6. 13038400 | -0. 30154100 |
| C | 1. 39214400  | -2. 62937300 | 2. 29376500  |
| H | 2. 43590900  | -2. 95254400 | 6. 01717900  |
| H | 5. 72894100  | -4. 46474000 | -2. 29905200 |
| C | 4. 55477900  | -3. 39713400 | 4. 06616300  |
| H | 5. 06092000  | -2. 77123400 | 4. 81002500  |
| H | 4. 72502900  | -4. 44108100 | 4. 36504000  |
| C | 4. 77013300  | -5. 26571600 | 0. 31531200  |
| C | 3. 76731700  | -5. 01518100 | 1. 46106300  |
| H | 2. 75540400  | -5. 27671600 | 1. 13124200  |
| H | 3. 98435400  | -5. 59286000 | 2. 36507300  |
| C | 4. 32660400  | -0. 03298500 | -2. 15965200 |
| C | 3. 57319900  | 0. 23341500  | -3. 32771600 |
| C | 5. 17198700  | 0. 96720100  | -1. 61532800 |
| C | 2. 72496900  | -0. 74403900 | -3. 93956800 |
| C | 3. 64661400  | 1. 53993800  | -3. 94509700 |
| C | 5. 24268200  | 2. 26611400  | -2. 24751300 |
| C | 2. 00894000  | -0. 45731400 | -5. 07130700 |
| H | 2. 62879000  | -1. 71509100 | -3. 47258500 |
| C | 2. 88444400  | 1. 79692200  | -5. 12830800 |
| C | 4. 47122800  | 2. 51979800  | -3. 38594200 |
| C | 2. 09086100  | 0. 82774300  | -5. 67942700 |
| H | 1. 35299000  | -1. 21098100 | -5. 49572700 |
| H | 2. 95744600  | 2. 78226300  | -5. 58345600 |
| H | 4. 53625600  | 3. 49563500  | -3. 86432900 |
| H | 1. 51665400  | 1. 03421900  | -6. 57876700 |
| C | -1. 00229300 | -2. 08877400 | 2. 98453000  |
| C | -1. 53674300 | -0. 84718300 | 3. 41114800  |
| C | -1. 82828700 | -3. 02548300 | 2. 31568600  |
| C | -0. 74461300 | 0. 16542600  | 4. 04507500  |
| C | -2. 93600300 | -0. 55717200 | 3. 18946000  |
| C | -3. 21319100 | -2. 70210700 | 2. 05853000  |
| C | -1. 29900300 | 1. 34608800  | 4. 46969800  |
| H | 0. 31655200  | -0. 00916800 | 4. 17430400  |
| C | -3. 47586100 | 0. 68497600  | 3. 65212900  |
| C | -3. 73247700 | -1. 48770200 | 2. 51552700  |
| C | -2. 68693100 | 1. 60983600  | 4. 28176100  |
| H | -0. 67430500 | 2. 08919900  | 4. 95964500  |



|   |             |             |             |
|---|-------------|-------------|-------------|
| H | -4.53450900 | 0.87608600  | 3.49141400  |
| H | -4.78214800 | -1.26058900 | 2.34078100  |
| H | -3.11210500 | 2.54545200  | 4.63570200  |
| C | 6.84897400  | 1.71418600  | 0.00152300  |
| H | 7.47711400  | 1.50966900  | 0.86426000  |
| C | 6.01078700  | 0.74094100  | -0.47637800 |
| H | 5.98516200  | -0.22894600 | 0.00677700  |
| C | 6.90967000  | 2.99285100  | -0.62171600 |
| H | 7.58494000  | 3.75093300  | -0.23377100 |
| C | 6.12472100  | 3.25756900  | -1.71208600 |
| H | 6.16774800  | 4.22675000  | -2.20420500 |
| C | -2.17554600 | -5.17678600 | 1.21061700  |
| H | -1.78895600 | -6.13991900 | 0.88842200  |
| C | -3.52707500 | -4.83364900 | 0.92354200  |
| H | -4.15508600 | -5.52812500 | 0.37247100  |
| C | -4.03050900 | -3.63293600 | 1.34383800  |
| H | -5.05827100 | -3.35719100 | 1.12445500  |
| C | -1.35855200 | -4.30658900 | 1.88294800  |
| H | -0.33354800 | -4.58806600 | 2.09421700  |
| C | 0.96984700  | 4.03709200  | 0.71662900  |
| C | 1.08853600  | 4.10808900  | -0.83798300 |
| H | 0.57074900  | 5.00013200  | -1.20625700 |
| H | 2.15096800  | 4.22918700  | -1.09725400 |
| C | 0.58031300  | 2.93239800  | -1.60024600 |
| C | -0.47292100 | 3.58569100  | 1.09178200  |
| H | -1.17707600 | 4.37636300  | 0.83416800  |
| H | -0.53059700 | 3.41749000  | 2.17148300  |
| N | -0.96496300 | 2.33998600  | 0.46710200  |
| C | -2.19496100 | 2.23008500  | -0.08191700 |
| N | -2.80756100 | 1.03002100  | -0.05164100 |
| C | -4.13142300 | 0.73410100  | -0.47761700 |
| C | -5.19797900 | 1.57700000  | -0.14966900 |
| C | -4.37658300 | -0.47413000 | -1.14022100 |
| C | -6.49545800 | 1.23255700  | -0.52796000 |
| C | -5.68296300 | -0.81391500 | -1.48777500 |
| H | -3.55198500 | -1.13923900 | -1.36422100 |
| C | -6.74943500 | 0.03766600  | -1.19980100 |
| H | -7.76077800 | -0.23024000 | -1.48178900 |
| C | -5.95794100 | -2.15277700 | -2.12305400 |
| C | -7.62601800 | 2.18399000  | -0.23350700 |
| F | -6.98656900 | -2.08640100 | -2.99709500 |
| F | -6.30336400 | -3.07606700 | -1.18874600 |
| F | -4.88803400 | -2.63507500 | -2.78073200 |
| F | -7.41031900 | 2.87723300  | 0.90737700  |

|   |             |             |             |
|---|-------------|-------------|-------------|
| F | -8.80354100 | 1.53647300  | -0.10007600 |
| F | -7.78305500 | 3.09197800  | -1.22201300 |
| S | -2.83561300 | 3.56673600  | -0.99336200 |
| H | -5.02884800 | 2.48526800  | 0.41421400  |
| H | -2.23171400 | 0.20393100  | 0.15145500  |
| H | -0.50991000 | 1.47532600  | 0.81002200  |
| C | -0.30837300 | 3.08085600  | -2.65031500 |
| H | -0.34824300 | 4.05041000  | -3.15302700 |
| H | -1.44367800 | 3.33547600  | -1.93364700 |
| H | -0.54823200 | 2.20669900  | -3.25261000 |
| N | 1.00497300  | -1.12496300 | -1.28271700 |
| S | -0.48648900 | -1.24395300 | -1.78650400 |
| O | -0.80281600 | -0.28780700 | -2.85935700 |
| O | -1.48865400 | -1.37233400 | -0.69030700 |
| C | -0.55328000 | -2.92174600 | -2.60199400 |
| F | -0.23870000 | -3.87704300 | -1.72615500 |
| F | 0.29987500  | -2.98388700 | -3.63545100 |
| F | -1.79412200 | -3.13293500 | -3.05677100 |
| H | 0.90341200  | 1.93232400  | -1.32116800 |
| C | 1.17352800  | 5.43529100  | 1.34206100  |
| C | 1.65698100  | 6.53522200  | 0.61936400  |
| C | 0.90275600  | 5.63313700  | 2.70793300  |
| C | 1.84300000  | 7.78017200  | 1.22487400  |
| H | 1.91081100  | 6.43815200  | -0.43009400 |
| C | 1.08178900  | 6.87482200  | 3.31554500  |
| H | 0.55603300  | 4.80709300  | 3.32154400  |
| C | 1.55059800  | 7.96001000  | 2.57468600  |
| H | 2.22149400  | 8.60905000  | 0.63250100  |
| H | 0.85701700  | 6.99046800  | 4.37259600  |
| H | 1.69204200  | 8.92886900  | 3.04550600  |
| C | 2.02211100  | 3.05731800  | 1.33423500  |
| H | 1.85455400  | 2.04695400  | 0.94791500  |
| H | 1.82128900  | 2.99699000  | 2.41050200  |
| C | 3.46141000  | 3.44454600  | 1.12556700  |
| H | 3.86856700  | 3.31386600  | 0.12367400  |
| C | 4.27184000  | 3.89336200  | 2.08459300  |
| H | 5.31165300  | 4.13298400  | 1.88082700  |
| H | 3.92981600  | 4.03067400  | 3.10845600  |

TS-EF-3SS-4

l imaginary frequency

H = -5236.777551

G = -5236.975236

E(M06-2X-DCM) = -5237.619385

E(M06-2X-cyclohexane) = -5237.591832

|   |             |             |             |
|---|-------------|-------------|-------------|
| O | -1.23244000 | -2.56360300 | -0.57899400 |
| O | -3.06694700 | -0.76075200 | -0.22723500 |
| P | -1.44497100 | -0.97851100 | -0.22855500 |
| O | -0.87698400 | -0.05962500 | -1.26716400 |
| C | -2.54348500 | -3.77696200 | -4.36333400 |
| C | -3.42198200 | -3.73412700 | -3.28517400 |
| C | -2.95965400 | -3.40009900 | -2.00427800 |
| C | -0.71097100 | -3.07514000 | -2.89809400 |
| C | -1.19638100 | -3.47807700 | -4.15411300 |
| C | -3.87030700 | -1.50264100 | 0.64264400  |
| C | -4.19411200 | -2.82314700 | 0.32762700  |
| C | -4.84824100 | -3.61107800 | 1.28894900  |
| C | -5.27291400 | -3.06086700 | 2.49317500  |
| C | -5.06028200 | -1.70256900 | 2.72795900  |
| C | -4.35536200 | -0.89728100 | 1.81938800  |
| H | -0.49610400 | -3.53455900 | -4.98247900 |
| H | -5.43201300 | -1.24533100 | 3.64039500  |
| C | -4.06077700 | -3.61370400 | -0.97385500 |
| C | -5.32449300 | -3.42221000 | -1.88132500 |
| H | -5.53031200 | -2.34960500 | -1.97478800 |
| H | -6.21636500 | -3.89803500 | -1.46180400 |
| H | -6.01691400 | -5.26705400 | 0.51774900  |
| H | -4.70471700 | -5.76817100 | 1.57868200  |
| C | -1.63313900 | -3.01487600 | -1.83650800 |
| H | -2.89427100 | -4.04376400 | -5.35714100 |
| H | -5.77973600 | -3.67151400 | 3.23609700  |
| C | -4.91275700 | -3.99338000 | -3.25672600 |
| H | -5.43995000 | -3.51241300 | -4.08856000 |
| H | -5.13111000 | -5.06842300 | -3.32526900 |
| C | -4.98143700 | -5.03981000 | 0.80791400  |
| C | -4.03415100 | -5.07376600 | -0.41030900 |
| H | -3.01466900 | -5.30365800 | -0.08019900 |
| H | -4.31776900 | -5.81646300 | -1.16263300 |
| C | -4.23596600 | 0.57081800  | 2.09801800  |
| C | -3.41112200 | 1.04471200  | 3.14552700  |
| C | -5.05854800 | 1.47306600  | 1.37659900  |
| C | -2.57376300 | 0.17940900  | 3.91916200  |
| C | -3.39204700 | 2.45687900  | 3.45967500  |
| C | -5.03556900 | 2.88140900  | 1.70516100  |
| C | -1.78180300 | 0.66670200  | 4.92464600  |
| H | -2.54707900 | -0.87396300 | 3.67462500  |
| C | -2.55373500 | 2.92383800  | 4.52098600  |
| C | -4.19823700 | 3.33491100  | 2.72975000  |

|   |              |              |              |
|---|--------------|--------------|--------------|
| C | -1. 77286800 | 2. 05624900  | 5. 23580000  |
| H | -1. 13557100 | -0. 01091800 | 5. 47396600  |
| H | -2. 55641500 | 3. 98748000  | 4. 74909800  |
| H | -4. 19407900 | 4. 39412000  | 2. 98166000  |
| H | -1. 13875800 | 2. 42286400  | 6. 03862200  |
| C | 0. 74249200  | -2. 76258100 | -2. 72956300 |
| C | 1. 31322700  | -1. 65729400 | -3. 40762000 |
| C | 1. 56030300  | -3. 61713400 | -1. 94959500 |
| C | 0. 53756600  | -0. 73681200 | -4. 18555600 |
| C | 2. 73663300  | -1. 41920700 | -3. 31566800 |
| C | 2. 97654800  | -3. 34969700 | -1. 84353700 |
| C | 1. 12514500  | 0. 30634100  | -4. 85482600 |
| H | -0. 53667500 | -0. 86902200 | -4. 22929200 |
| C | 3. 30964800  | -0. 31937400 | -4. 02997000 |
| C | 3. 52648100  | -2. 26579600 | -2. 53299300 |
| C | 2. 53287100  | 0. 51737000  | -4. 78533600 |
| H | 0. 51154200  | 0. 98039500  | -5. 44751700 |
| H | 4. 38545900  | -0. 17033100 | -3. 96629400 |
| H | 4. 59653300  | -2. 07995200 | -2. 46228200 |
| H | 2. 98302800  | 1. 34302400  | -5. 33015600 |
| C | -6. 76836800 | 1. 94171600  | -0. 30950800 |
| H | -7. 44478200 | 1. 58937200  | -1. 08346800 |
| C | -5. 95924900 | 1. 05012400  | 0. 34556300  |
| H | -6. 00512300 | -0. 00252600 | 0. 09123500  |
| C | -6. 73732700 | 3. 32771700  | 0. 01588900  |
| H | -7. 39123600 | 4. 01959700  | -0. 50827400 |
| C | -5. 89135700 | 3. 77979400  | 0. 99291500  |
| H | -5. 86193800 | 4. 83472800  | 1. 25601700  |
| C | 1. 87020900  | -5. 57138700 | -0. 51536200 |
| H | 1. 45537200  | -6. 43619200 | -0. 00452900 |
| C | 3. 26073200  | -5. 28979100 | -0. 39766300 |
| H | 3. 89240000  | -5. 93635600 | 0. 20528600  |
| C | 3. 79485100  | -4. 21174000 | -1. 04876200 |
| H | 4. 85665700  | -3. 98881800 | -0. 97569300 |
| C | 1. 05281000  | -4. 76790200 | -1. 26577500 |
| H | -0. 00110300 | -5. 00593100 | -1. 35038700 |
| C | -0. 87527200 | 3. 56748800  | -1. 47094600 |
| C | -1. 15111100 | 3. 08441000  | -0. 01728700 |
| H | -2. 02030800 | 3. 61787600  | 0. 39438700  |
| H | -1. 45595200 | 2. 03778700  | -0. 06693700 |
| C | -0. 04720600 | 3. 19487800  | 0. 98131800  |
| C | 0. 49797900  | 2. 96229600  | -1. 96191000 |
| H | 1. 24031600  | 3. 74840500  | -2. 07931300 |
| H | 0. 35159900  | 2. 48072600  | -2. 93447500 |

|   |              |              |              |
|---|--------------|--------------|--------------|
| N | 1. 09409300  | 1. 94622000  | -1. 08641900 |
| C | 2. 37591500  | 1. 96526400  | -0. 66421300 |
| N | 2. 90474800  | 0. 81087000  | -0. 22468900 |
| C | 4. 19994800  | 0. 66027000  | 0. 35507900  |
| C | 4. 30833400  | 0. 25321600  | 1. 68651800  |
| C | 5. 34233600  | 0. 85389700  | -0. 42259700 |
| C | 5. 57626200  | 0. 05041800  | 2. 23529900  |
| C | 6. 60177000  | 0. 65674700  | 0. 14233400  |
| H | 5. 24468400  | 1. 15739500  | -1. 45860000 |
| C | 6. 72565500  | 0. 25331600  | 1. 47204100  |
| H | 7. 70590300  | 0. 10991100  | 1. 91050100  |
| C | 7. 82903700  | 0. 80987000  | -0. 71742400 |
| C | 5. 70043300  | -0. 43412100 | 3. 65805600  |
| F | 8. 10577300  | -0. 33277800 | -1. 38940300 |
| F | 8. 92174000  | 1. 11295600  | 0. 01398400  |
| F | 7. 67249000  | 1. 77979700  | -1. 64420000 |
| F | 6. 87497300  | -0. 05658000 | 4. 21150800  |
| F | 5. 64747600  | -1. 78285100 | 3. 72632800  |
| F | 4. 70930300  | 0. 04329400  | 4. 43716900  |
| S | 3. 23664900  | 3. 46751100  | -0. 54050100 |
| H | 3. 41291600  | 0. 11794600  | 2. 28438500  |
| H | 2. 28966400  | -0. 01007400 | -0. 10695600 |
| H | 0. 58009900  | 1. 04737000  | -1. 09260100 |
| C | 0. 82303100  | 4. 26735800  | 1. 16425300  |
| H | 0. 56326500  | 5. 23005400  | 0. 72481700  |
| H | 1. 85166800  | 3. 97207700  | 0. 40559400  |
| H | 1. 33941300  | 4. 31426700  | 2. 12389400  |
| N | -0. 98758000 | -0. 81701800 | 1. 31642200  |
| S | 0. 50087200  | -0. 99843600 | 1. 80412100  |
| O | 0. 93020500  | 0. 09238500  | 2. 69958000  |
| O | 1. 46704800  | -1. 38061800 | 0. 73591300  |
| C | 0. 43307500  | -2. 51553000 | 2. 89205200  |
| F | -0. 40670800 | -2. 31730200 | 3. 91957100  |
| F | 1. 65249200  | -2. 76471300 | 3. 37867600  |
| F | 0. 01516000  | -3. 56951700 | 2. 18965800  |
| C | -0. 87171900 | 5. 09706400  | -1. 65257200 |
| C | -0. 31437100 | 5. 65499900  | -2. 81676500 |
| C | -1. 48372400 | 5. 97925100  | -0. 75028200 |
| C | -0. 34066500 | 7. 02841400  | -3. 05514800 |
| H | 0. 14513600  | 5. 01073400  | -3. 56153200 |
| C | -1. 50974800 | 7. 35685900  | -0. 98167700 |
| H | -1. 95252900 | 5. 60359500  | 0. 15314200  |
| C | -0. 93547600 | 7. 89059200  | -2. 13352600 |
| H | 0. 10573900  | 7. 42280500  | -3. 96415000 |

|   |             |            |             |
|---|-------------|------------|-------------|
| H | -1.98655500 | 8.01028900 | -0.25573800 |
| H | -0.95473800 | 8.96178500 | -2.31369100 |
| C | -2.00108500 | 2.97290900 | -2.39831700 |
| H | -1.77991100 | 3.29088900 | -3.42463300 |
| H | -1.90364500 | 1.88026800 | -2.36133800 |
| C | -3.40956700 | 3.36549000 | -2.05046300 |
| C | -4.16807800 | 4.18662900 | -2.77837300 |
| H | -3.80017900 | 4.64963700 | -3.69205800 |
| H | -5.18737200 | 4.42343100 | -2.48645400 |
| H | -3.83318600 | 2.91997800 | -1.15151600 |
| H | 0.07453500  | 2.33563600 | 1.64330300  |

TS-EF-3SS-5

1 imaginary frequency

H = -5236.782225

G = -5236.975623

E(M06-2X-DCM) = -5237.623252

E(M06-2X-cyclohexane) = -5237.596963

|   |             |             |             |
|---|-------------|-------------|-------------|
| O | -0.80291300 | -2.61844000 | -0.48184500 |
| O | -2.89303000 | -1.08674500 | -0.61617300 |
| P | -1.29212400 | -1.07027400 | -0.27169200 |
| O | -0.64371600 | -0.11005000 | -1.22200100 |
| C | -1.10458500 | -4.09720000 | -4.38960600 |
| C | -2.19546700 | -4.13628400 | -3.52737200 |
| C | -2.06606200 | -3.71386600 | -2.19637300 |
| C | 0.26978500  | -3.13427200 | -2.60442400 |
| C | 0.11947300  | -3.62951000 | -3.91201000 |
| C | -3.75840700 | -1.91113000 | 0.10707100  |
| C | -3.84030100 | -3.26782600 | -0.20980100 |
| C | -4.58225100 | -4.12088200 | 0.62312200  |
| C | -5.32231800 | -3.61293700 | 1.68468600  |
| C | -5.33063500 | -2.23635800 | 1.90356700  |
| C | -4.55031000 | -1.35776600 | 1.13338200  |
| H | 0.98654900  | -3.62252800 | -4.56580100 |
| H | -5.94028700 | -1.81893900 | 2.69948800  |
| C | -3.32994300 | -4.05246100 | -1.41660500 |
| C | -4.38099800 | -4.04335800 | -2.57881500 |
| H | -4.69097300 | -3.00830500 | -2.76392800 |
| H | -5.27775800 | -4.62190200 | -2.33610100 |
| H | -5.34016800 | -5.92635900 | -0.30823200 |
| H | -4.23803000 | -6.23593300 | 1.02897400  |
| C | -0.86331700 | -3.15684500 | -1.76949500 |
| H | -1.19611900 | -4.43233800 | -5.41975600 |
| H | -5.89983500 | -4.27247600 | 2.32744800  |

|   |             |             |             |
|---|-------------|-------------|-------------|
| C | -3.61405300 | -4.58347800 | -3.80596700 |
| H | -4.00107300 | -4.18980300 | -4.75283500 |
| H | -3.68124200 | -5.67865500 | -3.87000200 |
| C | -4.42900100 | -5.56149200 | 0.18645300  |
| C | -3.24329900 | -5.48832400 | -0.79868700 |
| H | -2.29924900 | -5.57741900 | -0.24914300 |
| H | -3.26110200 | -6.27266100 | -1.56178500 |
| C | -4.66905200 | 0.11143800  | 1.40125700  |
| C | -4.23176100 | 0.64737600  | 2.63739000  |
| C | -5.34809900 | 0.93705600  | 0.46904600  |
| C | -3.51135200 | -0.12726700 | 3.60185000  |
| C | -4.49965500 | 2.03306200  | 2.95392500  |
| C | -5.59888700 | 2.32440700  | 0.79239600  |
| C | -3.10258400 | 0.41621500  | 4.79083200  |
| H | -3.25467200 | -1.15026800 | 3.36110400  |
| C | -4.06834600 | 2.55742700  | 4.21319300  |
| C | -5.17548300 | 2.83159100  | 2.02581100  |
| C | -3.39291000 | 1.77319900  | 5.10893100  |
| H | -2.53035300 | -0.18834200 | 5.48790200  |
| H | -4.29031300 | 3.59768900  | 4.44126300  |
| H | -5.39542800 | 3.86809200  | 2.27718900  |
| H | -3.06621900 | 2.18423700  | 6.06042300  |
| C | 1.61397100  | -2.65241700 | -2.16021100 |
| C | 2.21590500  | -1.54656900 | -2.81126400 |
| C | 2.32358100  | -3.35950600 | -1.15736000 |
| C | 1.52805000  | -0.74535300 | -3.78043000 |
| C | 3.57740300  | -1.18130100 | -2.48980300 |
| C | 3.66261700  | -2.94512200 | -0.80500700 |
| C | 2.14965200  | 0.29917300  | -4.41464900 |
| H | 0.48936700  | -0.96627300 | -3.99500300 |
| C | 4.19672400  | -0.09575300 | -3.18809800 |
| C | 4.25991900  | -1.88636000 | -1.49490100 |
| C | 3.50718500  | 0.62266500  | -4.12796200 |
| H | 1.60095800  | 0.89146600  | -5.14242500 |
| H | 5.22808500  | 0.15104600  | -2.94743400 |
| H | 5.28047800  | -1.60167800 | -1.24808000 |
| H | 3.98786600  | 1.44407600  | -4.65292400 |
| C | -6.49852700 | 1.27485100  | -1.66330000 |
| H | -6.85480800 | 0.87893600  | -2.61031400 |
| C | -5.83818800 | 0.45365400  | -0.78707300 |
| H | -5.68345100 | -0.58788200 | -1.04289900 |
| C | -6.72852500 | 2.64333200  | -1.34554200 |
| H | -7.25534900 | 3.27973200  | -2.05131100 |
| C | -6.29431600 | 3.14745000  | -0.14909200 |

|   |             |             |             |
|---|-------------|-------------|-------------|
| H | -6.47516100 | 4.18775600  | 0.11211400  |
| C | 2.49067400  | -5.14119600 | 0.50736400  |
| H | 2.05245000  | -5.99813700 | 1.01199900  |
| C | 3.79174300  | -4.69966900 | 0.87946000  |
| H | 4.32907100  | -5.21210000 | 1.67272800  |
| C | 4.36129200  | -3.63599600 | 0.23425300  |
| H | 5.35024100  | -3.28341900 | 0.51348100  |
| C | 1.78551600  | -4.49747400 | -0.47530000 |
| H | 0.79850300  | -4.85384700 | -0.74545600 |
| C | -1.44903200 | 3.54844900  | -0.89753400 |
| C | -1.55094200 | 2.99617000  | 0.55598400  |
| H | -2.49956200 | 3.31532100  | 1.01596200  |
| H | -1.62747300 | 1.90663200  | 0.52288900  |
| C | -0.48288700 | 3.34699100  | 1.52556300  |
| C | 0.00359600  | 3.29614400  | -1.43133700 |
| H | 0.59887000  | 4.20400700  | -1.38336600 |
| H | -0.05307000 | 2.98626600  | -2.48027400 |
| N | 0.76611600  | 2.26906600  | -0.71176800 |
| C | 2.04133700  | 2.41773200  | -0.29890100 |
| N | 2.68648400  | 1.29152400  | 0.07662400  |
| C | 4.04964500  | 1.15842600  | 0.43565900  |
| C | 4.38113100  | 0.31867400  | 1.50721200  |
| C | 5.06001300  | 1.76157000  | -0.31556300 |
| C | 5.72146800  | 0.11059400  | 1.82620000  |
| C | 6.39667100  | 1.54211700  | 0.01854500  |
| H | 4.81098000  | 2.37213500  | -1.17396400 |
| C | 6.73941200  | 0.72320100  | 1.09163100  |
| H | 7.77931500  | 0.56104100  | 1.34920400  |
| C | 7.46129800  | 2.12511900  | -0.87145900 |
| C | 6.10048600  | -0.82989800 | 2.94044800  |
| F | 7.56828700  | 1.41772700  | -2.02665500 |
| F | 8.67692700  | 2.11651700  | -0.28870500 |
| F | 7.18162800  | 3.39770500  | -1.22310300 |
| F | 7.12234300  | -0.33707900 | 3.67581900  |
| F | 6.52105400  | -2.02557300 | 2.45293800  |
| F | 5.07524400  | -1.07752000 | 3.77529700  |
| S | 2.74311200  | 3.99286600  | -0.10697900 |
| H | 3.59399800  | -0.17299700 | 2.06723300  |
| H | 2.11525800  | 0.45499000  | 0.25805700  |
| H | 0.40010100  | 1.30663500  | -0.83761600 |
| C | 0.22860700  | 4.54781500  | 1.60239000  |
| H | -0.18210900 | 5.41952300  | 1.09204600  |
| H | 1.26507200  | 4.33201900  | 0.89086500  |
| H | 0.71507500  | 4.75712500  | 2.55673000  |



|   |             |             |             |
|---|-------------|-------------|-------------|
| N | -1.21351600 | -0.79850400 | 1.32260900  |
| S | 0.12708800  | -0.67308600 | 2.14473700  |
| O | 0.10086400  | 0.47271900  | 3.06982200  |
| O | 1.36999200  | -0.85062900 | 1.34179700  |
| C | 0.11853900  | -2.17918000 | 3.24948600  |
| F | -0.95007300 | -2.16049000 | 4.06028200  |
| F | 1.22460800  | -2.18281900 | 3.99954300  |
| F | 0.08190900  | -3.29052200 | 2.51309100  |
| C | -1.82712800 | 5.04169900  | -1.00880600 |
| C | -1.19096400 | 5.90748400  | -1.91482300 |
| C | -2.90199900 | 5.56714900  | -0.27022100 |
| C | -1.58472800 | 7.24079400  | -2.05017900 |
| H | -0.38298600 | 5.54990200  | -2.54393500 |
| C | -3.29624400 | 6.89873500  | -0.40009300 |
| H | -3.45650700 | 4.93306200  | 0.41464100  |
| C | -2.63492400 | 7.74780100  | -1.28770700 |
| H | -1.06480000 | 7.87983000  | -2.75891500 |
| H | -4.12595400 | 7.27060100  | 0.19554100  |
| H | -2.93903700 | 8.78592600  | -1.38814900 |
| C | -2.48064500 | 2.71552900  | -1.74753700 |
| H | -2.22784600 | 1.65574500  | -1.64866900 |
| H | -3.47124500 | 2.86089200  | -1.29772400 |
| C | -2.54392300 | 3.07395700  | -3.20687700 |
| C | -2.18774700 | 2.24496600  | -4.19174100 |
| H | -1.81847900 | 1.24293500  | -3.98239000 |
| H | -2.26624600 | 2.53197500  | -5.23756900 |
| H | -2.91584200 | 4.06778100  | -3.45481200 |
| H | -0.23671700 | 2.55978400  | 2.24207300  |

TS-EF-3SS-6

l imaginary frequency

H = -5236.779668

G = -5236.973660

E(M06-2X-DCM) = -5237.621719

E(M06-2X-cyclohexane) = -5237.594507

|   |             |             |             |
|---|-------------|-------------|-------------|
| O | -0.75086400 | -2.63535400 | -0.52040000 |
| O | -2.86673000 | -1.13438800 | -0.59976000 |
| P | -1.26300100 | -1.10044300 | -0.27201900 |
| O | -0.63896600 | -0.11085500 | -1.20831500 |
| C | -1.08593900 | -4.03897100 | -4.45268900 |
| C | -2.16152300 | -4.11835200 | -3.57414500 |
| C | -2.01931300 | -3.71943900 | -2.23729500 |
| C | 0.29735500  | -3.08383100 | -2.67039500 |
| C | 0.13576400  | -3.55476600 | -3.98552200 |

|   |             |             |             |
|---|-------------|-------------|-------------|
| C | -3.71047200 | -1.98554300 | 0.11820500  |
| C | -3.77123800 | -3.33856900 | -0.21826700 |
| C | -4.48627100 | -4.21750500 | 0.61130400  |
| C | -5.22187400 | -3.73917200 | 1.68967800  |
| C | -5.25526700 | -2.36592800 | 1.92760700  |
| C | -4.50223200 | -1.46196000 | 1.16002500  |
| H | 0.99144200  | -3.51579500 | -4.65309400 |
| H | -5.86395100 | -1.97139100 | 2.73590900  |
| C | -3.26439300 | -4.09502000 | -1.44448100 |
| C | -4.33315100 | -4.08630000 | -2.59068100 |
| H | -4.66588700 | -3.05444800 | -2.75259400 |
| H | -5.21466000 | -4.68661400 | -2.34494300 |
| H | -5.22358900 | -6.02313500 | -0.33620200 |
| H | -4.09609700 | -6.33146800 | 0.97993800  |
| C | -0.82106200 | -3.14750800 | -1.81814300 |
| H | -1.18748000 | -4.35493200 | -5.48793100 |
| H | -5.77787200 | -4.41895100 | 2.33032700  |
| C | -3.57502400 | -4.58921600 | -3.83892800 |
| H | -3.98472400 | -4.18693200 | -4.77251200 |
| H | -3.62113400 | -5.68427400 | -3.92130000 |
| C | -4.31221600 | -5.64834100 | 0.15059000  |
| C | -3.14270400 | -5.53831200 | -0.85056600 |
| H | -2.18909800 | -5.61867100 | -0.31638000 |
| H | -3.15791800 | -6.31102100 | -1.62552000 |
| C | -4.65043200 | 0.00217100  | 1.44212900  |
| C | -4.19176200 | 0.54384800  | 2.66750000  |
| C | -5.37812800 | 0.81331800  | 0.53418800  |
| C | -3.43420600 | -0.21964300 | 3.61213800  |
| C | -4.47765900 | 1.92380000  | 2.99387100  |
| C | -5.65112800 | 2.19372500  | 0.86893800  |
| C | -3.00416700 | 0.32966600  | 4.79082000  |
| H | -3.16777000 | -1.23834800 | 3.36391000  |
| C | -4.02090000 | 2.45489400  | 4.24136300  |
| C | -5.19738800 | 2.70936800  | 2.08801500  |
| C | -3.30805400 | 1.68170800  | 5.11750800  |
| H | -2.40453100 | -0.26595600 | 5.47230500  |
| H | -4.25514000 | 3.49077500  | 4.47690900  |
| H | -5.43087600 | 3.74080000  | 2.34766700  |
| H | -2.96299300 | 2.09758000  | 6.06037600  |
| C | 1.63890800  | -2.58446300 | -2.23723500 |
| C | 2.20607700  | -1.44974500 | -2.86949000 |
| C | 2.38108900  | -3.30221100 | -1.26606400 |
| C | 1.48364900  | -0.63795700 | -3.80425600 |
| C | 3.56595700  | -1.06531800 | -2.56368600 |

|   |              |              |              |
|---|--------------|--------------|--------------|
| C | 3. 71812900  | -2. 87001500 | -0. 92769900 |
| C | 2. 07309200  | 0. 43437700  | -4. 42291600 |
| H | 0. 44503400  | -0. 87277400 | -4. 00370400 |
| C | 4. 15031600  | 0. 05039700  | -3. 24443700 |
| C | 4. 28128000  | -1. 78206400 | -1. 60069400 |
| C | 3. 42922500  | 0. 77814800  | -4. 15294100 |
| H | 1. 50061400  | 1. 03146600  | -5. 12834500 |
| H | 5. 18110400  | 0. 31142800  | -3. 01630400 |
| H | 5. 30071400  | -1. 48353000 | -1. 36586900 |
| H | 3. 88389700  | 1. 62168700  | -4. 66588300 |
| C | -6. 61801400 | 1. 12236600  | -1. 55193900 |
| H | -7. 00066800 | 0. 71790700  | -2. 48493200 |
| C | -5. 90017100 | 0. 31914500  | -0. 70487400 |
| H | -5. 72583700 | -0. 71721300 | -0. 96928100 |
| C | -6. 87433400 | 2. 48341500  | -1. 22119100 |
| H | -7. 45221300 | 3. 10408500  | -1. 90078200 |
| C | -6. 40372200 | 2. 99917400  | -0. 04322000 |
| H | -6. 60238700 | 4. 03377100  | 0. 22732200  |
| C | 2. 61421400  | -5. 12180200 | 0. 34888000  |
| H | 2. 20242400  | -5. 99979400 | 0. 83937500  |
| C | 3. 91326700  | -4. 66394500 | 0. 70817300  |
| H | 4. 47538400  | -5. 18544500 | 1. 47799300  |
| C | 4. 44965500  | -3. 57298000 | 0. 08035900  |
| H | 5. 43672400  | -3. 20814700 | 0. 35039100  |
| C | 1. 87813300  | -4. 46753700 | -0. 60367400 |
| H | 0. 89313800  | -4. 83617700 | -0. 86457500 |
| C | -1. 47051400 | 3. 51768100  | -0. 86845200 |
| C | -1. 56299100 | 2. 93151700  | 0. 57164000  |
| H | -2. 51846000 | 3. 22149100  | 1. 03566900  |
| H | -1. 61765700 | 1. 84190500  | 0. 51209900  |
| C | -0. 50225700 | 3. 28258900  | 1. 55201100  |
| C | -0. 01469800 | 3. 27666300  | -1. 40910400 |
| H | 0. 57178200  | 4. 19047500  | -1. 36466400 |
| H | -0. 05727100 | 2. 96120400  | -2. 45642800 |
| N | 0. 76055000  | 2. 25585300  | -0. 69430400 |
| C | 2. 03202900  | 2. 41761200  | -0. 27768200 |
| N | 2. 69447300  | 1. 29821500  | 0. 08484700  |
| C | 4. 06146600  | 1. 17985000  | 0. 43399300  |
| C | 4. 41210100  | 0. 32255900  | 1. 48544800  |
| C | 5. 05781200  | 1. 81351000  | -0. 31060300 |
| C | 5. 75738600  | 0. 12696900  | 1. 79076600  |
| C | 6. 39977700  | 1. 60628400  | 0. 00985000  |
| H | 4. 79454900  | 2. 43764200  | -1. 15497200 |
| C | 6. 76152000  | 0. 76960000  | 1. 06265000  |

|   |              |              |              |
|---|--------------|--------------|--------------|
| H | 7. 80535200  | 0. 61628100  | 1. 30931300  |
| C | 7. 44833100  | 2. 22552000  | -0. 87485400 |
| C | 6. 15668200  | -0. 83413500 | 2. 88023600  |
| F | 7. 53888100  | 1. 56089100  | -2. 05641400 |
| F | 8. 67287200  | 2. 20145400  | -0. 31199000 |
| F | 7. 15787800  | 3. 50875800  | -1. 17572600 |
| F | 5. 14401200  | -1. 10414000 | 3. 72346400  |
| F | 7. 18586200  | -0. 35095300 | 3. 61162100  |
| F | 6. 57605700  | -2. 01714200 | 2. 36227400  |
| S | 2. 70531800  | 4. 00332700  | -0. 06018100 |
| H | 3. 63590600  | -0. 19252700 | 2. 03970500  |
| H | 2. 13715900  | 0. 44923600  | 0. 25369700  |
| H | 0. 40264400  | 1. 29011600  | -0. 82298600 |
| C | 0. 19014000  | 4. 48962700  | 1. 65229400  |
| H | -0. 22584700 | 5. 36535400  | 1. 15371800  |
| H | 1. 24063500  | 4. 29968000  | 0. 92546200  |
| H | 0. 68224800  | 4. 68665200  | 2. 60611800  |
| N | -1. 16786700 | -0. 86078900 | 1. 32630600  |
| S | 0. 18204600  | -0. 73254600 | 2. 13211700  |
| O | 0. 15832600  | 0. 39972500  | 3. 07366600  |
| O | 1. 41614700  | -0. 88652800 | 1. 31022800  |
| C | 0. 20187400  | -2. 25397200 | 3. 21513200  |
| F | -0. 85532300 | -2. 25499200 | 4. 04105500  |
| F | 1. 31850100  | -2. 25914300 | 3. 94941200  |
| F | 0. 16354200  | -3. 35522100 | 2. 46384200  |
| C | -1. 84838600 | 5. 01270200  | -0. 93811000 |
| C | -1. 22666100 | 5. 89817300  | -1. 83366100 |
| C | -2. 91006400 | 5. 52121600  | -0. 17047600 |
| C | -1. 61819400 | 7. 23496200  | -1. 93005400 |
| H | -0. 43016600 | 5. 55500700  | -2. 48543700 |
| C | -3. 30477100 | 6. 85590600  | -0. 26295500 |
| H | -3. 45485900 | 4. 87245600  | 0. 50847800  |
| C | -2. 65534500 | 7. 72518700  | -1. 13937300 |
| H | -1. 10866700 | 7. 88980400  | -2. 63189500 |
| H | -4. 12479400 | 7. 21431600  | 0. 35402800  |
| H | -2. 95894800 | 8. 76594700  | -1. 21007300 |
| C | -2. 50967500 | 2. 70805800  | -1. 73079200 |
| H | -2. 20683900 | 1. 65344800  | -1. 70409300 |
| H | -3. 48614400 | 2. 77760000  | -1. 23955100 |
| C | -2. 65114400 | 3. 14601400  | -3. 16337800 |
| C | -3. 77927800 | 3. 60222000  | -3. 70892700 |
| H | -4. 69083500 | 3. 70846200  | -3. 12524300 |
| H | -3. 83575100 | 3. 87685200  | -4. 75912800 |
| H | -1. 77088100 | 3. 04545800  | -3. 80029600 |

H -0.24658700 2.48692900 2.25561500

TS-EF-3SR

1 imaginary frequency

H = -5236.772475

G = -5236.968577

E(M06-2X-DCM) = -5237.621849

E(M06-2X-cyclohexane) = -5237.593322

|   |             |             |             |
|---|-------------|-------------|-------------|
| O | -1.02715900 | -2.38403900 | -0.45169900 |
| O | -2.89637700 | -0.61143900 | -0.16113500 |
| P | -1.26590400 | -0.80482600 | -0.07150200 |
| O | -0.63329800 | 0.13477300  | -1.04769400 |
| C | -2.06831100 | -3.47296400 | -4.35516800 |
| C | -3.01911400 | -3.46759700 | -3.33921400 |
| C | -2.64696000 | -3.17805600 | -2.01895900 |
| C | -0.34338500 | -2.82728000 | -2.74134500 |
| C | -0.73917500 | -3.18484000 | -4.04167600 |
| C | -3.73757200 | -1.39169100 | 0.63438100  |
| C | -4.03407500 | -2.70025800 | 0.24735300  |
| C | -4.73923500 | -3.53191600 | 1.13289800  |
| C | -5.23846600 | -3.03728100 | 2.33229900  |
| C | -5.04763500 | -1.69014700 | 2.63754700  |
| C | -4.29648500 | -0.84254700 | 1.80786900  |
| H | 0.01782800  | -3.21586300 | -4.82001700 |
| H | -5.47413200 | -1.27464400 | 3.54601300  |
| C | -3.81243000 | -3.43605300 | -1.07395900 |
| C | -5.01417400 | -3.21584400 | -2.05540900 |
| H | -5.22085900 | -2.14115300 | -2.12121900 |
| H | -5.92906400 | -3.71104800 | -1.71523500 |
| H | -5.84762600 | -5.15692900 | 0.21987500  |
| H | -4.60289700 | -5.69885200 | 1.34057900  |
| C | -1.33703500 | -2.79685300 | -1.74468600 |
| H | -2.34851500 | -3.70570100 | -5.37956400 |
| H | -5.78406400 | -3.68184700 | 3.01680900  |
| C | -4.50733200 | -3.73193900 | -3.42108600 |
| H | -4.98076800 | -3.22168900 | -4.26792700 |
| H | -4.71511200 | -4.80408300 | -3.54510500 |
| C | -4.83393200 | -4.93929100 | 0.58502800  |
| C | -3.81115600 | -4.91831600 | -0.57019500 |
| H | -2.81311800 | -5.15619200 | -0.18496600 |
| H | -4.04017400 | -5.63090300 | -1.36886900 |
| C | -4.20513300 | 0.61070500  | 2.16328600  |
| C | -3.44933900 | 1.03856300  | 3.28049200  |
| C | -4.98689400 | 1.54380700  | 1.43606500  |

|   |             |             |             |
|---|-------------|-------------|-------------|
| C | -2.66226800 | 0.13994600  | 4.06866100  |
| C | -3.45366400 | 2.43577000  | 3.65586300  |
| C | -4.96458400 | 2.94163600  | 1.80728200  |
| C | -1.94664300 | 0.58159700  | 5.14942900  |
| H | -2.61037100 | -0.90015600 | 3.77623000  |
| C | -2.69736500 | 2.85423400  | 4.79573400  |
| C | -4.19622900 | 3.34890800  | 2.90238600  |
| C | -1.96789800 | 1.95495900  | 5.52531400  |
| H | -1.33565800 | -0.11893600 | 5.71000900  |
| H | -2.71954800 | 3.90657100  | 5.07030400  |
| H | -4.19526600 | 4.39924200  | 3.18849900  |
| H | -1.39523500 | 2.28452000  | 6.38813800  |
| C | 1.09507800  | -2.53337900 | -2.45746200 |
| C | 1.72405900  | -1.41902400 | -3.06546300 |
| C | 1.84353200  | -3.40957800 | -1.63270100 |
| C | 1.01173000  | -0.46148400 | -3.85987000 |
| C | 3.14153700  | -1.20449900 | -2.87204100 |
| C | 3.24681800  | -3.15150900 | -1.40420000 |
| C | 1.65772900  | 0.58941700  | -4.45931800 |
| H | -0.06165300 | -0.56347000 | -3.96398200 |
| C | 3.77793900  | -0.10070000 | -3.52457500 |
| C | 3.86043600  | -2.06951000 | -2.04172200 |
| C | 3.06288900  | 0.76842800  | -4.30399300 |
| H | 1.08931900  | 1.29683600  | -5.05744500 |
| H | 4.84808700  | 0.03181100  | -3.38298900 |
| H | 4.92364200  | -1.89729600 | -1.88775700 |
| H | 3.56021900  | 1.59844000  | -4.79941800 |
| C | -6.60358800 | 2.08552900  | -0.31999800 |
| H | -7.25603900 | 1.76344400  | -1.12729100 |
| C | -5.84961800 | 1.16169800  | 0.35739400  |
| H | -5.91382000 | 0.11319300  | 0.08834700  |
| C | -6.54851400 | 3.46521500  | 0.02700100  |
| H | -7.14868400 | 4.18408700  | -0.52410200 |
| C | -5.75294800 | 3.87555700  | 1.06278300  |
| H | -5.71603500 | 4.92353800  | 1.35182000  |
| C | 2.02281300  | -5.37998400 | -0.19914600 |
| H | 1.56344600  | -6.24984700 | 0.26263700  |
| C | 3.39428100  | -5.09542600 | 0.05456400  |
| H | 3.96495000  | -5.74020600 | 0.71720600  |
| C | 3.98810700  | -4.01447800 | -0.53772900 |
| H | 5.03061600  | -3.77836000 | -0.34359300 |
| C | 1.27667500  | -4.56851600 | -1.01256400 |
| H | 0.23467900  | -4.80422000 | -1.19432100 |
| C | -0.98017500 | 4.02709500  | -1.56748900 |

|   |             |             |             |
|---|-------------|-------------|-------------|
| C | -1.35553100 | 4.14272500  | -0.05290900 |
| H | -1.05027800 | 5.13655100  | 0.29425300  |
| H | -2.44880900 | 4.11770300  | 0.04642400  |
| C | -0.77682000 | 3.12318300  | 0.86890000  |
| C | 0.53024000  | 3.70727600  | -1.68963500 |
| H | 1.11351800  | 4.53293000  | -1.28240300 |
| H | 0.79631100  | 3.60191300  | -2.74683200 |
| N | 0.98228900  | 2.48176800  | -1.00745300 |
| C | 2.15506800  | 2.40120400  | -0.34698200 |
| N | 2.77216400  | 1.20599500  | -0.25330600 |
| C | 4.10441400  | 0.99372600  | 0.20548200  |
| C | 5.13685200  | 1.81786800  | -0.25259900 |
| C | 4.39339500  | -0.09566300 | 1.03312500  |
| C | 6.44853900  | 1.58080600  | 0.15629800  |
| C | 5.71513000  | -0.33334000 | 1.41030500  |
| H | 3.58945800  | -0.74117500 | 1.36645800  |
| C | 6.74803600  | 0.50455100  | 0.99005400  |
| H | 7.76998500  | 0.31580600  | 1.29721900  |
| C | 6.05109000  | -1.54978200 | 2.23454400  |
| C | 7.54134300  | 2.51912300  | -0.28455800 |
| F | 7.05367700  | -1.29733200 | 3.10534600  |
| F | 6.47617400  | -2.57142800 | 1.44507100  |
| F | 4.99776200  | -2.00061200 | 2.93641800  |
| F | 7.29335100  | 3.03204700  | -1.51138900 |
| F | 8.74114700  | 1.90171700  | -0.33636200 |
| F | 7.67063000  | 3.56603600  | 0.56018100  |
| S | 2.72366200  | 3.78620500  | 0.54396000  |
| H | 4.92801900  | 2.62798500  | -0.94043500 |
| H | 2.23016700  | 0.36477200  | -0.46205400 |
| H | 0.52595800  | 1.59932700  | -1.29281600 |
| C | 0.01822200  | 3.46462100  | 1.94828400  |
| H | -0.04342700 | 4.48804900  | 2.32603100  |
| H | 1.22457500  | 3.66643400  | 1.31761100  |
| H | 0.26581700  | 2.68982300  | 2.67343900  |
| N | -0.92894500 | -0.67991800 | 1.50529600  |
| S | 0.54440400  | -0.81484400 | 2.06743600  |
| O | 0.87443600  | 0.25460600  | 3.02189600  |
| O | 1.56088600  | -1.13762300 | 1.03200800  |
| C | 0.47861800  | -2.36988700 | 3.10011200  |
| F | 0.12508400  | -3.41425400 | 2.34754300  |
| F | -0.40724500 | -2.24164300 | 4.10138100  |
| F | 1.68641000  | -2.59909800 | 3.62759900  |
| C | -1.82167300 | 3.03148400  | -2.39145000 |
| C | -2.89901700 | 2.30794800  | -1.87210900 |

|   |             |            |             |
|---|-------------|------------|-------------|
| C | -1.53701500 | 2.87760600 | -3.76205600 |
| C | -3.66040200 | 1.46347500 | -2.68465400 |
| H | -3.16018400 | 2.36812200 | -0.82234600 |
| C | -2.29323000 | 2.03774400 | -4.57549300 |
| H | -0.71920600 | 3.42980600 | -4.21752100 |
| C | -3.36485700 | 1.32340400 | -4.03686400 |
| H | -4.48231500 | 0.91378000 | -2.23965700 |
| H | -2.04797900 | 1.94807900 | -5.63070000 |
| H | -3.95776100 | 0.66503900 | -4.66585700 |
| C | -1.16670800 | 5.46028500 | -2.18357100 |
| H | -0.49229500 | 6.15888200 | -1.67144400 |
| H | -0.84601800 | 5.42542400 | -3.23329900 |
| C | -2.57509600 | 5.98429500 | -2.11782300 |
| C | -2.93053100 | 7.12329200 | -1.52108500 |
| H | -2.20368000 | 7.76461200 | -1.02571500 |
| H | -3.96163100 | 7.46626500 | -1.51476200 |
| H | -3.33534900 | 5.37513200 | -2.60496400 |
| H | -0.97305800 | 2.07274100 | 0.67219100  |

TS-EF-3SR-1

l imaginary frequency

H = -5236.775828

G = -5236.972578

E(M06-2X-DCM) = -5237.619438

E(M06-2X-cyclohexane) = -5237.592631

|   |             |             |             |
|---|-------------|-------------|-------------|
| O | -1.55187500 | -2.45063300 | -0.25240900 |
| O | -3.04111400 | -0.36222300 | 0.11145700  |
| P | -1.48131000 | -0.83178600 | -0.01467600 |
| O | -0.91083800 | -0.08830700 | -1.18478300 |
| C | -3.28428800 | -3.62858100 | -3.87524500 |
| C | -4.07578900 | -3.36714800 | -2.76124900 |
| C | -3.48740400 | -3.05489100 | -1.52664500 |
| C | -1.27357900 | -3.18446900 | -2.55100300 |
| C | -1.89532500 | -3.56702400 | -3.75168000 |
| C | -3.88122600 | -0.92498400 | 1.07456900  |
| C | -4.46411800 | -2.16989800 | 0.83390600  |
| C | -5.18883000 | -2.79146400 | 1.86380600  |
| C | -5.42221400 | -2.13536800 | 3.06734200  |
| C | -4.92850100 | -0.84309800 | 3.24079400  |
| C | -4.14090100 | -0.21344400 | 2.26275800  |
| H | -1.26665100 | -3.79435500 | -4.60772900 |
| H | -5.13318600 | -0.30453700 | 4.16134200  |
| C | -4.55076600 | -3.01831500 | -0.43494600 |
| C | -5.80698400 | -2.63875200 | -1.29082500 |



|   |             |             |             |
|---|-------------|-------------|-------------|
| H | -5.81780300 | -1.55222300 | -1.43661600 |
| H | -6.74579900 | -2.91875800 | -0.80302400 |
| H | -6.68745400 | -4.22232100 | 1.22227900  |
| H | -5.43612800 | -4.92534200 | 2.24160000  |
| C | -2.10585400 | -2.90277300 | -1.45080000 |
| H | -3.73535600 | -3.88202400 | -4.83142400 |
| H | -5.98875800 | -2.61505600 | 3.86150200  |
| C | -5.58503900 | -3.34456200 | -2.64744300 |
| H | -6.06200300 | -2.81718000 | -3.48158600 |
| H | -6.00002700 | -4.36222200 | -2.64133200 |
| C | -5.61358200 | -4.18453700 | 1.45367000  |
| C | -4.75700200 | -4.43698200 | 0.19519400  |
| H | -3.77907700 | -4.83634000 | 0.48733500  |
| H | -5.21046900 | -5.14369700 | -0.50680600 |
| C | -3.66456600 | 1.18479500  | 2.50933900  |
| C | -2.75350400 | 1.44871100  | 3.56153400  |
| C | -4.20871700 | 2.25504900  | 1.75479900  |
| C | -2.13944200 | 0.41092800  | 4.33370100  |
| C | -2.39644900 | 2.81481100  | 3.87360000  |
| C | -3.82662400 | 3.61488600  | 2.06529600  |
| C | -1.26578200 | 0.69930400  | 5.34838100  |
| H | -2.34549500 | -0.62061500 | 4.07925800  |
| C | -1.49057800 | 3.07287600  | 4.95015900  |
| C | -2.93903200 | 3.85718800  | 3.11756500  |
| C | -0.94370500 | 2.04771500  | 5.67236500  |
| H | -0.79488400 | -0.11045900 | 5.89780800  |
| H | -1.24354900 | 4.10751400  | 5.17733700  |
| H | -2.66823600 | 4.88382000  | 3.35765300  |
| H | -0.25150800 | 2.25538100  | 6.48387400  |
| C | 0.21856800  | -3.10901100 | -2.47201900 |
| C | 0.92273400  | -2.15795000 | -3.25104200 |
| C | 0.92859400  | -4.02945200 | -1.66172700 |
| C | 0.26682300  | -1.18639400 | -4.07600900 |
| C | 2.36844900  | -2.13840600 | -3.22016600 |
| C | 2.37212200  | -3.98138000 | -1.62222500 |
| C | 0.97937400  | -0.29800600 | -4.84022500 |
| H | -0.81580000 | -1.15263400 | -4.08071600 |
| C | 3.07389300  | -1.19171800 | -4.02940700 |
| C | 3.05132200  | -3.04305900 | -2.40328000 |
| C | 2.40440700  | -0.30094600 | -4.82457000 |
| H | 0.45248900  | 0.41877200  | -5.46510000 |
| H | 4.16145400  | -1.20481900 | -4.00383500 |
| H | 4.13913200  | -3.02090700 | -2.37939400 |
| H | 2.95258900  | 0.40505000  | -5.44293300 |

|   |             |             |             |
|---|-------------|-------------|-------------|
| C | -5.65493300 | 3.11778700  | -0.02009300 |
| H | -6.36424000 | 2.93786300  | -0.82314000 |
| C | -5.15378600 | 2.06203700  | 0.69583600  |
| H | -5.47851600 | 1.05472600  | 0.46200400  |
| C | -5.25858900 | 4.45241800  | 0.27705300  |
| H | -5.66760300 | 5.27704300  | -0.30038700 |
| C | -4.37548900 | 4.68939500  | 1.29595600  |
| H | -4.07762700 | 5.70500800  | 1.54779100  |
| C | 0.99659800  | -5.91135600 | -0.10385100 |
| H | 0.47618200  | -6.66572900 | 0.48014900  |
| C | 2.41761000  | -5.84429300 | -0.05281600 |
| H | 2.96806400  | -6.54133700 | 0.57308300  |
| C | 3.08199300  | -4.90752400 | -0.79627800 |
| H | 4.16760000  | -4.84882200 | -0.77414800 |
| C | 0.28059900  | -5.03973000 | -0.88156400 |
| H | -0.80017100 | -5.11470800 | -0.91381000 |
| C | -0.59690100 | 3.67926700  | -1.90199500 |
| C | -0.99941800 | 3.37120400  | -0.41367800 |
| H | -1.63140100 | 4.20112500  | -0.07116100 |
| H | -1.62177200 | 2.47732300  | -0.39323800 |
| C | 0.10858000  | 3.18777800  | 0.58028200  |
| C | 0.45679100  | 2.62028100  | -2.42009700 |
| H | 1.23818400  | 3.13404300  | -2.98251300 |
| H | -0.03723300 | 1.91798700  | -3.09190000 |
| N | 1.10765800  | 1.76804500  | -1.41108600 |
| C | 2.40205600  | 1.80175400  | -1.05560600 |
| N | 2.94072000  | 0.69466200  | -0.51803600 |
| C | 4.26167100  | 0.58580200  | 0.01212500  |
| C | 5.36567200  | 0.71660600  | -0.83219300 |
| C | 4.43244400  | 0.27806000  | 1.36344400  |
| C | 6.65053100  | 0.56183200  | -0.31433200 |
| C | 5.72604400  | 0.11182000  | 1.86361400  |
| H | 3.56620100  | 0.18464600  | 2.01147700  |
| C | 6.83747100  | 0.25640300  | 1.03430000  |
| H | 7.83701800  | 0.12923500  | 1.43247700  |
| C | 5.91694200  | -0.27757200 | 3.30835900  |
| C | 7.84380100  | 0.76829700  | -1.21035200 |
| F | 5.83960800  | -1.61667600 | 3.47234400  |
| F | 4.97970500  | 0.27648200  | 4.10235100  |
| F | 7.12742800  | 0.10826300  | 3.77169200  |
| F | 7.57112200  | 0.42713800  | -2.48986800 |
| F | 8.90386400  | 0.03465600  | -0.80909200 |
| F | 8.23887300  | 2.06092500  | -1.22285600 |
| S | 3.26768200  | 3.31232500  | -1.09847400 |

|   |             |             |             |
|---|-------------|-------------|-------------|
| H | 5.21875200  | 0.92240700  | -1.88604300 |
| H | 2.32662300  | -0.11095400 | -0.31126500 |
| H | 0.56429400  | 0.90158400  | -1.23789400 |
| C | 1.09250800  | 4.10558600  | 0.90151300  |
| H | 0.94594600  | 5.15154300  | 0.63513400  |
| H | 2.08299700  | 3.81955500  | -0.03982000 |
| H | 1.66879800  | 3.92369000  | 1.80815500  |
| N | -0.84341500 | -0.63646100 | 1.45845100  |
| S | 0.66708700  | -0.94511300 | 1.80129600  |
| O | 1.26434900  | 0.11032100  | 2.63729900  |
| O | 1.48931800  | -1.40330300 | 0.64430900  |
| C | 0.58215900  | -2.45370100 | 2.90172100  |
| F | 0.02581000  | -3.47323500 | 2.24569800  |
| F | -0.14544700 | -2.19203500 | 3.99629800  |
| F | 1.81861600  | -2.79331100 | 3.27886100  |
| C | -1.86858000 | 3.55049300  | -2.78195300 |
| C | -2.58603400 | 2.33936200  | -2.78334900 |
| C | -2.33089000 | 4.57568900  | -3.62057100 |
| C | -3.72039700 | 2.17182200  | -3.57502800 |
| H | -2.25072300 | 1.50279400  | -2.17718500 |
| C | -3.46912200 | 4.40831400  | -4.41515100 |
| H | -1.81434700 | 5.52653400  | -3.67608600 |
| C | -4.17283600 | 3.20726800  | -4.39480800 |
| H | -4.24737000 | 1.22163100  | -3.55054800 |
| H | -3.79758800 | 5.22545900  | -5.05230000 |
| H | -5.05693600 | 3.07624100  | -5.01317800 |
| C | 0.04478100  | 5.09282900  | -2.03403700 |
| H | 1.06368100  | 5.06755700  | -1.64145600 |
| H | 0.16762900  | 5.29343200  | -3.10775300 |
| C | -0.70678500 | 6.23452900  | -1.39284500 |
| C | -0.12606400 | 7.26467400  | -0.77268700 |
| H | 0.95579600  | 7.34504700  | -0.67824700 |
| H | -0.70860800 | 8.07934200  | -0.35113800 |
| H | -1.79335800 | 6.21471800  | -1.46609700 |
| H | 0.12046400  | 2.24025400  | 1.11824800  |

TS-EF-3SR-2

l imaginary frequency

H = -5236.771437

G = -5236.966845

E(M06-2X-DCM) = -5237.613732

E(M06-2X-cyclohexane) = -5237.586387

|   |            |             |             |
|---|------------|-------------|-------------|
| O | 1.27929600 | -2.48180500 | -0.06248900 |
| O | 2.97997400 | -0.54438100 | -0.35869200 |

|   |             |              |              |
|---|-------------|--------------|--------------|
| P | 1. 38569200 | -0. 84845500 | -0. 14856100 |
| O | 0. 97048700 | -0. 15718200 | 1. 11352300  |
| C | 3. 17728700 | -4. 26292300 | 3. 21389800  |
| C | 3. 88610300 | -3. 97182600 | 2. 05258900  |
| C | 3. 22860900 | -3. 44902100 | 0. 92980600  |
| C | 1. 12470900 | -3. 43298900 | 2. 16787500  |
| C | 1. 80338300 | -4. 02119500 | 3. 24904400  |
| C | 3. 66193200 | -1. 08287300 | -1. 45078100 |
| C | 4. 08457900 | -2. 41258700 | -1. 41495200 |
| C | 4. 61946700 | -2. 98799900 | -2. 57927400 |
| C | 4. 83414500 | -2. 22250300 | -3. 71997100 |
| C | 4. 52515900 | -0. 86298200 | -3. 68972500 |
| C | 3. 93001500 | -0. 26546900 | -2. 56717700 |
| H | 1. 23448700 | -4. 26887500 | 4. 14053700  |
| H | 4. 72948700 | -0. 24124900 | -4. 55657100 |
| C | 4. 17540600 | -3. 41375500 | -0. 26346000 |
| C | 5. 54896600 | -3. 29630600 | 0. 48189800  |
| H | 5. 72085300 | -2. 24425500 | 0. 73723600  |
| H | 6. 38908700 | -3. 63237800 | -0. 13387500 |
| H | 5. 95782200 | -4. 66640900 | -2. 27093200 |
| H | 4. 52760200 | -5. 07292900 | -3. 21328800 |
| C | 1. 87806000 | -3. 12432500 | 1. 01956900  |
| H | 3. 68010700 | -4. 67734900 | 4. 08414800  |
| H | 5. 25015800 | -2. 66892700 | -4. 61962000 |
| C | 5. 36640500 | -4. 12169400 | 1. 77531400  |
| H | 5. 98794000 | -3. 75605700 | 2. 60073100  |
| H | 5. 63824500 | -5. 17524200 | 1. 61961000  |
| C | 4. 88238200 | -4. 46400300 | -2. 37392000 |
| C | 4. 12513700 | -4. 75945300 | -1. 06207600 |
| H | 3. 07835900 | -4. 99616900 | -1. 28435900 |
| H | 4. 54440700 | -5. 59677400 | -0. 49546000 |
| C | 3. 68251500 | 1. 21237300  | -2. 58316600 |
| C | 2. 69888500 | 1. 76732300  | -3. 43629900 |
| C | 4. 52664100 | 2. 06240000  | -1. 82404000 |
| C | 1. 81653500 | 0. 96074800  | -4. 22398200 |
| C | 2. 55325300 | 3. 20408800  | -3. 52302700 |
| C | 4. 36695000 | 3. 49694700  | -1. 91639200 |
| C | 0. 87400500 | 1. 52611100  | -5. 04082700 |
| H | 1. 87776300 | -0. 11586500 | -4. 13703000 |
| C | 1. 56159200 | 3. 75376300  | -4. 39572200 |
| C | 3. 38547200 | 4. 02716900  | -2. 75962800 |
| C | 0. 74728700 | 2. 94122800  | -5. 13682300 |
| H | 0. 19898700 | 0. 88753100  | -5. 60234600 |
| H | 1. 47227300 | 4. 83617900  | -4. 45605900 |

|   |             |             |             |
|---|-------------|-------------|-------------|
| H | 3.27926600  | 5.10788200  | -2.83678400 |
| H | -0.00502700 | 3.36992900  | -5.79351100 |
| C | -0.34785200 | -3.18566200 | 2.26600000  |
| C | -0.84550100 | -2.25964100 | 3.21581900  |
| C | -1.24527300 | -3.93087100 | 1.46165100  |
| C | 0.00938800  | -1.44625100 | 4.02916300  |
| C | -2.27321900 | -2.10227500 | 3.38153100  |
| C | -2.66975000 | -3.73839200 | 1.61316100  |
| C | -0.50351500 | -0.58183800 | 4.96225100  |
| H | 1.08098400  | -1.51008900 | 3.88510500  |
| C | -2.76661900 | -1.18939900 | 4.36697200  |
| C | -3.14477600 | -2.84302000 | 2.57688700  |
| C | -1.91120400 | -0.45451300 | 5.14286000  |
| H | 0.17149000  | 0.01614100  | 5.56942100  |
| H | -3.84365000 | -1.09552200 | 4.48668700  |
| H | -4.21923000 | -2.72551100 | 2.70583100  |
| H | -2.29990100 | 0.23012400  | 5.89219800  |
| C | 6.39478800  | 2.41547600  | -0.28389500 |
| H | 7.18787800  | 2.00856600  | 0.33777500  |
| C | 5.57587300  | 1.56767700  | -0.98387200 |
| H | 5.72749500  | 0.49675500  | -0.91352800 |
| C | 6.22408200  | 3.82688400  | -0.36869800 |
| H | 6.88630400  | 4.48563000  | 0.18704100  |
| C | 5.23597500  | 4.34731800  | -1.16195800 |
| H | 5.10383000  | 5.42370300  | -1.24814000 |
| C | -1.70266600 | -5.59431200 | -0.26846900 |
| H | -1.34120200 | -6.31971500 | -0.99240100 |
| C | -3.10319700 | -5.37742600 | -0.13467800 |
| H | -3.79636000 | -5.92992000 | -0.76306300 |
| C | -3.57082300 | -4.47849900 | 0.78470700  |
| H | -4.63704800 | -4.29943200 | 0.89394400  |
| C | -0.80842200 | -4.89922900 | 0.50233900  |
| H | 0.25361500  | -5.08298900 | 0.38896300  |
| C | 1.00688200  | 3.46633600  | 2.14617300  |
| C | 1.34154200  | 3.26384900  | 0.62858100  |
| H | 2.03377300  | 4.05823500  | 0.32308100  |
| H | 1.87033700  | 2.31409200  | 0.52343400  |
| C | 0.20021000  | 3.27767400  | -0.34702000 |
| C | -0.14752900 | 2.48480900  | 2.56671000  |
| H | -0.86314700 | 3.00219600  | 3.20693600  |
| H | 0.27721100  | 1.64937600  | 3.12357900  |
| N | -0.88796800 | 1.83012800  | 1.47273200  |
| C | -2.18744400 | 2.00898300  | 1.17456700  |
| N | -2.83463700 | 0.98131700  | 0.60482900  |

|   |             |             |             |
|---|-------------|-------------|-------------|
| C | -4.14764800 | 0.89753700  | 0.06496200  |
| C | -4.74939700 | 1.89478600  | -0.70680000 |
| C | -4.81310900 | -0.31266000 | 0.27994900  |
| C | -6.03141500 | 1.68569900  | -1.21473000 |
| C | -6.08874600 | -0.51165500 | -0.24446800 |
| H | -4.32504500 | -1.09310000 | 0.85323200  |
| C | -6.71221700 | 0.48891900  | -0.98764500 |
| H | -7.70584600 | 0.33694500  | -1.39134100 |
| C | -6.76500700 | -1.84146300 | -0.03300100 |
| C | -6.71048200 | 2.78993900  | -1.98396500 |
| F | -6.31071500 | -2.77818800 | -0.89295800 |
| F | -8.10129200 | -1.76062500 | -0.19600500 |
| F | -6.53754300 | -2.32131100 | 1.21656900  |
| F | -7.44327200 | 3.58157400  | -1.16728900 |
| F | -7.55358900 | 2.30170900  | -2.91869200 |
| F | -5.81980600 | 3.58747000  | -2.61136600 |
| S | -2.88774000 | 3.58802900  | 1.38551400  |
| H | -4.22812300 | 2.81580100  | -0.92207500 |
| H | -2.29838200 | 0.11269000  | 0.44907500  |
| H | -0.42662400 | 0.93762300  | 1.20799800  |
| C | -0.66908000 | 4.32385600  | -0.59477500 |
| H | -0.42001100 | 5.32787100  | -0.25495600 |
| H | -1.69630800 | 4.07212000  | 0.35743200  |
| H | -1.26849100 | 4.27274400  | -1.50294100 |
| N | 0.68052100  | -0.45150600 | -1.55072500 |
| S | -0.87064400 | -0.60673600 | -1.81386600 |
| O | -1.43869900 | 0.58557200  | -2.46080600 |
| O | -1.63627700 | -1.16693000 | -0.66168800 |
| C | -0.97131300 | -1.95808000 | -3.09981700 |
| F | -0.30461200 | -1.59684300 | -4.20726800 |
| F | -2.25065900 | -2.17064600 | -3.42239500 |
| F | -0.44292000 | -3.08880600 | -2.62846900 |
| C | 2.26579300  | 3.18064100  | 2.99460200  |
| C | 2.14444800  | 2.82076500  | 4.34934400  |
| C | 3.56252500  | 3.32640300  | 2.48118100  |
| C | 3.26583300  | 2.60422100  | 5.14960200  |
| H | 1.16224500  | 2.72057900  | 4.80049300  |
| C | 4.68722500  | 3.10749300  | 3.27952500  |
| H | 3.72519000  | 3.60014500  | 1.44509700  |
| C | 4.54744000  | 2.74386600  | 4.61699000  |
| H | 3.13321800  | 2.32562100  | 6.19186400  |
| H | 5.67466700  | 3.21680700  | 2.83992200  |
| H | 5.42320000  | 2.57084700  | 5.23657400  |
| C | 0.57419500  | 4.95829600  | 2.40237600  |

|   |             |            |             |
|---|-------------|------------|-------------|
| H | 1.35326700  | 5.59878200 | 1.96543000  |
| H | -0.35390400 | 5.15775900 | 1.86303800  |
| C | 0.37233800  | 5.35903800 | 3.84061700  |
| C | -0.80902900 | 5.67198300 | 4.37858500  |
| H | -1.73017300 | 5.64167300 | 3.80039200  |
| H | -0.89809000 | 5.97582500 | 5.41846200  |
| H | 1.26549300  | 5.40708000 | 4.46037300  |
| H | 0.07517000  | 2.38181100 | -0.95346700 |

TS-EF-3SR-3

l imaginary frequency

H = -5236.771977

G = -5236.964820

E(M06-2X-DCM) = -5237.611789

E(M06-2X-cyclohexane) = -5237.580897

|   |             |            |             |
|---|-------------|------------|-------------|
| O | -0.05880300 | 2.97516300 | 0.07844100  |
| O | 1.99893500  | 1.44805000 | 0.42700300  |
| P | 0.36177500  | 1.43620700 | 0.44677800  |
| O | -0.10754800 | 0.44870200 | -0.58205900 |
| C | 1.56267800  | 4.94984800 | -3.23737800 |
| C | 2.22741400  | 4.94249000 | -2.01568700 |
| C | 1.66657100  | 4.30927400 | -0.89657700 |
| C | -0.24385200 | 3.62519500 | -2.25347100 |
| C | 0.32977800  | 4.30742600 | -3.33987600 |
| C | 2.67904100  | 2.12087200 | 1.44560500  |
| C | 2.72370900  | 3.51290600 | 1.45366400  |
| C | 3.14532100  | 4.17165600 | 2.61889500  |
| C | 3.66450100  | 3.45066200 | 3.68978700  |
| C | 3.79934000  | 2.06490400 | 3.57210700  |
| C | 3.31005400  | 1.36885100 | 2.45552000  |
| H | -0.20742800 | 4.31545100 | -4.28393600 |
| H | 4.27987100  | 1.49780600 | 4.36425300  |
| C | 2.53471500  | 4.53618600 | 0.33614400  |
| C | 3.91974100  | 4.80800800 | -0.35491900 |
| H | 4.39145000  | 3.84500400 | -0.58239000 |
| H | 4.60358300  | 5.36962000 | 0.28850500  |
| H | 3.90348000  | 6.19613200 | 2.39426400  |
| H | 2.42534000  | 6.09807600 | 3.34334900  |
| C | 0.46017700  | 3.62480300 | -1.03406200 |
| H | 1.99550700  | 5.44388800 | -4.10357400 |
| H | 3.99465800  | 3.95580700 | 4.59407500  |
| C | 3.57559700  | 5.53264900 | -1.67118100 |
| H | 4.32356100  | 5.36809100 | -2.45509300 |
| H | 3.50569900  | 6.61986000 | -1.52321300 |

|   |             |             |             |
|---|-------------|-------------|-------------|
| C | 2.94377500  | 5.66763000  | 2.47879100  |
| C | 2.11584800  | 5.78538800  | 1.17524500  |
| H | 1.04654800  | 5.71531500  | 1.40404000  |
| H | 2.28500400  | 6.72539000  | 0.63976800  |
| C | 3.57718800  | -0.09702200 | 2.29761500  |
| C | 2.96407300  | -1.05443200 | 3.13924300  |
| C | 4.53502200  | -0.50852800 | 1.33379400  |
| C | 1.98959800  | -0.70232400 | 4.12629100  |
| C | 3.31115600  | -2.45249500 | 3.00575500  |
| C | 4.85769800  | -1.91102200 | 1.19986300  |
| C | 1.42402800  | -1.65169500 | 4.93706600  |
| H | 1.68212600  | 0.33223500  | 4.20743500  |
| C | 2.69737400  | -3.41022800 | 3.87257800  |
| C | 4.23741500  | -2.84347800 | 2.03618800  |
| C | 1.78602700  | -3.02347900 | 4.81726900  |
| H | 0.67722500  | -1.35798300 | 5.66804000  |
| H | 2.97672300  | -4.45569900 | 3.76273500  |
| H | 4.47778100  | -3.89824200 | 1.92565200  |
| H | 1.32774600  | -3.75999500 | 5.47222200  |
| C | -1.57580300 | 2.96829700  | -2.43932500 |
| C | -1.69309800 | 1.84607200  | -3.29409000 |
| C | -2.73050600 | 3.53543400  | -1.84760200 |
| C | -0.56093600 | 1.21180600  | -3.90266200 |
| C | -3.00007600 | 1.29644100  | -3.57642200 |
| C | -4.02885200 | 2.96550200  | -2.12511000 |
| C | -0.70604600 | 0.14659300  | -4.75415000 |
| H | 0.43214700  | 1.57961600  | -3.67259400 |
| C | -3.11059200 | 0.18901300  | -4.47708100 |
| C | -4.12939500 | 1.86617100  | -2.98213800 |
| C | -2.00064200 | -0.36632700 | -5.05818000 |
| H | 0.17294000  | -0.31563300 | -5.19352300 |
| H | -4.10538300 | -0.18872100 | -4.70602600 |
| H | -5.11259000 | 1.45356300  | -3.20103100 |
| H | -2.10126100 | -1.19065500 | -5.76051200 |
| C | 6.15380700  | -0.02102500 | -0.43614500 |
| H | 6.66819500  | 0.70226200  | -1.06342200 |
| C | 5.23515500  | 0.40965600  | 0.48545400  |
| H | 5.03754200  | 1.47040900  | 0.58561500  |
| C | 6.44649700  | -1.40631200 | -0.57965700 |
| H | 7.17446500  | -1.73045100 | -1.31861600 |
| C | 5.81745300  | -2.32076500 | 0.22139500  |
| H | 6.03032600  | -3.38176000 | 0.12369300  |
| C | -3.81626300 | 5.22560600  | -0.45754500 |
| H | -3.74686200 | 6.09792100  | 0.18653200  |



|   |             |             |             |
|---|-------------|-------------|-------------|
| C | -5.09211200 | 4.65441600  | -0.72751400 |
| H | -5.98298200 | 5.09741200  | -0.29006700 |
| C | -5.19126800 | 3.55720800  | -1.53933300 |
| H | -6.15879700 | 3.11246800  | -1.75855000 |
| C | -2.67922600 | 4.68739000  | -0.99935300 |
| H | -1.71712700 | 5.13841300  | -0.78678500 |
| C | -4.93665200 | -3.04041500 | 0.41992800  |
| C | -4.90570100 | -3.55756900 | -1.05083600 |
| H | -4.62466400 | -4.61783900 | -1.08248600 |
| H | -5.92643400 | -3.49638900 | -1.45725600 |
| C | -4.02850600 | -2.79027800 | -1.96453900 |
| C | -3.49358800 | -3.12556200 | 0.99645100  |
| H | -3.22531900 | -4.18028100 | 1.07250000  |
| H | -3.46446400 | -2.69798000 | 2.00134200  |
| N | -2.43282100 | -2.45463700 | 0.21995800  |
| C | -1.31742700 | -3.06581800 | -0.26866400 |
| N | -0.24424400 | -2.28673900 | -0.47302100 |
| C | 0.96200400  | -2.64982500 | -1.13921800 |
| C | 1.69777800  | -3.78415100 | -0.78860900 |
| C | 1.43737000  | -1.78116200 | -2.12496400 |
| C | 2.88284000  | -4.06866700 | -1.46691100 |
| C | 2.63173500  | -2.07292400 | -2.78312600 |
| H | 0.88144600  | -0.87940100 | -2.35266400 |
| C | 3.35651100  | -3.22118800 | -2.46885000 |
| H | 4.28915600  | -3.43760500 | -2.97476800 |
| C | 3.10189500  | -1.15789800 | -3.88267200 |
| C | 3.63622700  | -5.32887700 | -1.13348100 |
| F | 2.48833500  | -1.44837200 | -5.06218800 |
| F | 4.42861800  | -1.26315700 | -4.09949500 |
| F | 2.82856300  | 0.13642300  | -3.61672100 |
| F | 3.51838100  | -5.65729700 | 0.17431100  |
| F | 4.95756400  | -5.21573100 | -1.40301100 |
| F | 3.18173600  | -6.38588800 | -1.84337800 |
| S | -1.38224400 | -4.72060000 | -0.78246200 |
| H | 1.36431700  | -4.42716200 | 0.01465500  |
| H | -0.31603700 | -1.25865000 | -0.31153300 |
| H | -2.26381000 | -1.50133200 | 0.56489200  |
| C | -3.22075500 | -3.44320600 | -2.90073600 |
| H | -3.59852100 | -4.39380700 | -3.29026700 |
| H | -2.39111100 | -3.98105600 | -2.11570100 |
| H | -2.67624500 | -2.83296600 | -3.61944000 |
| N | -0.09952300 | 1.26052200  | 1.98598100  |
| S | -1.59985900 | 0.90191800  | 2.33177600  |
| O | -1.88927100 | -0.56159600 | 2.26739200  |

|   |             |             |             |
|---|-------------|-------------|-------------|
| O | -2.63296100 | 1.77007300  | 1.74044600  |
| C | -1.63834400 | 1.30835000  | 4.15056100  |
| F | -0.74395000 | 0.59802000  | 4.84830700  |
| F | -2.86202200 | 1.02097600  | 4.61428500  |
| F | -1.39888300 | 2.60704100  | 4.33787400  |
| C | -5.59632600 | -1.64941900 | 0.45610700  |
| C | -6.89372700 | -1.49259400 | -0.07107700 |
| C | -4.98089800 | -0.52036100 | 1.00829000  |
| C | -7.54353400 | -0.26119800 | -0.04689800 |
| H | -7.42158700 | -2.34283100 | -0.49741300 |
| C | -5.62308100 | 0.72235700  | 1.02076000  |
| H | -3.99553200 | -0.57601000 | 1.45308100  |
| C | -6.90624500 | 0.85632600  | 0.49775700  |
| H | -8.54781000 | -0.17678900 | -0.45443900 |
| H | -5.09069800 | 1.57287100  | 1.43262100  |
| H | -7.40660300 | 1.82063500  | 0.51215500  |
| C | -5.79681000 | -4.05394600 | 1.24908400  |
| H | -5.37578000 | -5.06093800 | 1.12853700  |
| H | -6.80346200 | -4.07928500 | 0.81049300  |
| C | -5.90633400 | -3.72724300 | 2.71486300  |
| C | -5.54128700 | -4.54731200 | 3.70139700  |
| H | -5.11886700 | -5.53116700 | 3.50533400  |
| H | -5.65519900 | -4.26864900 | 4.74530900  |
| H | -3.98794400 | -1.70761400 | -1.86346200 |
| H | -6.32446700 | -2.75073100 | 2.95636700  |

TS-EF-3SR-4

l imaginary frequency

H = -5236.774000

G = -5236.965323

E(M06-2X-DCM) = -5237.617008

E(M06-2X-cyclohexane) = -5237.585961

|   |             |            |             |
|---|-------------|------------|-------------|
| O | 0.12868900  | 2.92877400 | -0.11971500 |
| O | -1.99871200 | 1.49173000 | -0.45063200 |
| P | -0.36331300 | 1.41712000 | -0.52740700 |
| O | 0.09505200  | 0.39052800 | 0.46624400  |
| C | -1.30847600 | 4.78929100 | 3.34965200  |
| C | -2.02535600 | 4.84838300 | 2.15956400  |
| C | -1.52592300 | 4.25872200 | 0.98812700  |
| C | 0.42776900  | 3.48287000 | 2.22694600  |
| C | -0.08334400 | 4.12504800 | 3.36730700  |
| C | -2.67669300 | 2.22882300 | -1.42752300 |
| C | -2.68831400 | 3.61993600 | -1.35917700 |
| C | -3.11971500 | 4.35430400 | -2.47418900 |

|   |             |             |             |
|---|-------------|-------------|-------------|
| C | -3.66899100 | 3.70769100  | -3.57659800 |
| C | -3.81957500 | 2.31975600  | -3.54101400 |
| C | -3.32677800 | 1.54990100  | -2.47551100 |
| H | 0.49665200  | 4.08338000  | 4.28480700  |
| H | -4.31251700 | 1.80688400  | -4.36186800 |
| C | -2.43813700 | 4.57134800  | -0.19286900 |
| C | -3.78779300 | 4.83270600  | 0.56671200  |
| H | -4.27152300 | 3.86841800  | 0.76081100  |
| H | -4.48345800 | 5.44219000  | -0.01778500 |
| H | -3.83462100 | 6.37267400  | -2.10349500 |
| H | -2.38923400 | 6.30978100  | -3.10505100 |
| C | -0.32898400 | 3.54565300  | 1.04039900  |
| H | -1.69421900 | 5.25013700  | 4.25547000  |
| H | -4.00417900 | 4.27093700  | -4.44391100 |
| C | -3.37540200 | 5.47849600  | 1.90406100  |
| H | -4.09251100 | 5.28372500  | 2.70959700  |
| H | -3.29104900 | 6.57082800  | 1.81260400  |
| C | -2.88753700 | 5.83530600  | -2.25182700 |
| C | -2.01786300 | 5.85929500  | -0.97158300 |
| H | -0.95820300 | 5.77994200  | -1.23931200 |
| H | -2.14782400 | 6.76961600  | -0.37704500 |
| C | -3.60542600 | 0.07833000  | -2.42833100 |
| C | -2.98057200 | -0.81608400 | -3.32889300 |
| C | -4.59284500 | -0.39454500 | -1.52570200 |
| C | -1.96933500 | -0.39985900 | -4.25229900 |
| C | -3.35232500 | -2.21459000 | -3.32170400 |
| C | -4.94435400 | -1.79670900 | -1.52134300 |
| C | -1.38564200 | -1.28977900 | -5.11603900 |
| H | -1.63588400 | 0.63001500  | -4.23784500 |
| C | -2.72552800 | -3.10725300 | -4.24666600 |
| C | -4.31426800 | -2.66724300 | -2.41538500 |
| C | -1.77464100 | -2.65940500 | -5.12370700 |
| H | -0.59793100 | -0.94681600 | -5.77889300 |
| H | -3.02487200 | -4.15305500 | -4.23475500 |
| H | -4.58169000 | -3.72141600 | -2.40521300 |
| H | -1.30438000 | -3.34814400 | -5.82105600 |
| C | 1.75633300  | 2.80151200  | 2.32243500  |
| C | 1.89697900  | 1.63554500  | 3.11259400  |
| C | 2.89055800  | 3.38386200  | 1.70710200  |
| C | 0.78815700  | 0.99864500  | 3.75982900  |
| C | 3.20466900  | 1.04484400  | 3.28816500  |
| C | 4.18884200  | 2.77310000  | 1.87686100  |
| C | 0.95780700  | -0.10979800 | 4.54949700  |
| H | -0.20658400 | 1.40373600  | 3.61496000  |

|   |             |             |             |
|---|-------------|-------------|-------------|
| C | 3.34061900  | -0.11227300 | 4.12033700  |
| C | 4.31156600  | 1.62235700  | 2.66034100  |
| C | 2.25415600  | -0.66970800 | 4.74269600  |
| H | 0.09577600  | -0.56692800 | 5.02666800  |
| H | 4.33753500  | -0.52330500 | 4.26801400  |
| H | 5.29355000  | 1.17187200  | 2.79008200  |
| H | 2.37682800  | -1.52916000 | 5.39792700  |
| C | -6.25200800 | -0.02497700 | 0.23506600  |
| H | -6.76974200 | 0.65263200  | 0.90901600  |
| C | -5.29748700 | 0.46276900  | -0.61931300 |
| H | -5.07288200 | 1.52309800  | -0.62042800 |
| C | -6.57828800 | -1.41036100 | 0.24700000  |
| H | -7.33647600 | -1.78102500 | 0.93180200  |
| C | -5.94200800 | -2.26693100 | -0.61049100 |
| H | -6.18322800 | -3.32619300 | -0.61451000 |
| C | 3.93458700  | 5.13112300  | 0.35503000  |
| H | 3.84978300  | 6.04295500  | -0.22984800 |
| C | 5.20973000  | 4.51764000  | 0.51470500  |
| H | 6.08432500  | 4.96626500  | 0.05114000  |
| C | 5.32919800  | 3.37426100  | 1.25738800  |
| H | 6.29759100  | 2.90040600  | 1.39752500  |
| C | 2.81829600  | 4.58584400  | 0.93220600  |
| H | 1.85660300  | 5.06949400  | 0.80609700  |
| C | 4.61591600  | -3.41062600 | -0.55996900 |
| C | 4.51645400  | -4.08272100 | 0.84217700  |
| H | 4.11477800  | -5.09984700 | 0.75101100  |
| H | 5.53102900  | -4.19275800 | 1.25181700  |
| C | 3.72103600  | -3.33272700 | 1.84266600  |
| C | 3.17202100  | -3.28774800 | -1.12557800 |
| H | 2.80068800  | -4.29580800 | -1.31836900 |
| H | 3.17065500  | -2.73672000 | -2.06884100 |
| N | 2.18836300  | -2.61852600 | -0.25206300 |
| C | 1.00208800  | -3.16790400 | 0.14261000  |
| N | -0.00299600 | -2.31632700 | 0.38178700  |
| C | -1.21767100 | -2.59251800 | 1.07542600  |
| C | -2.06889000 | -3.64277900 | 0.72538300  |
| C | -1.56978500 | -1.71628600 | 2.10494300  |
| C | -3.24535700 | -3.83926200 | 1.44959000  |
| C | -2.75453200 | -1.92013900 | 2.81085600  |
| H | -0.92188100 | -0.87867000 | 2.33414900  |
| C | -3.59502600 | -2.98675800 | 2.49683000  |
| H | -4.51904400 | -3.13729200 | 3.04086700  |
| C | -3.07865200 | -1.00389700 | 3.96060800  |
| C | -4.12098200 | -5.01829900 | 1.11639100  |

|   |             |             |             |
|---|-------------|-------------|-------------|
| F | -2.37971200 | -1.34860700 | 5.07635700  |
| F | -4.38460600 | -1.04197100 | 4.29193400  |
| F | -2.75855100 | 0.27933100  | 3.69005700  |
| F | -4.13566900 | -5.27611100 | -0.21251700 |
| F | -5.40097300 | -4.82653000 | 1.50487000  |
| F | -3.68923200 | -6.14609100 | 1.72591900  |
| S | 0.90733300  | -4.86091200 | 0.49976500  |
| H | -1.83031300 | -4.28807000 | -0.10902600 |
| H | 0.14904200  | -1.29123200 | 0.23800600  |
| H | 2.12682100  | -1.61339800 | -0.45103800 |
| C | 2.85633300  | -4.00037900 | 2.71393000  |
| H | 3.13656800  | -5.02001600 | 2.99567000  |
| H | 1.97529100  | -4.37187500 | 1.88053900  |
| H | 2.37251300  | -3.42200800 | 3.49894200  |
| N | 0.01941800  | 1.31742900  | -2.08888700 |
| S | 1.30788900  | 0.70571300  | -2.75059300 |
| O | 1.16177800  | 0.59221500  | -4.20170500 |
| O | 1.87881000  | -0.47033900 | -2.03410200 |
| C | 2.63074200  | 2.00707700  | -2.52606300 |
| F | 2.23780900  | 3.18224800  | -3.01743800 |
| F | 3.75222300  | 1.62583600  | -3.16388800 |
| F | 2.92058700  | 2.15212300  | -1.22326700 |
| C | 5.41514000  | -2.09901000 | -0.45528700 |
| C | 6.68131100  | -2.12011400 | 0.16139500  |
| C | 4.97717300  | -0.88297100 | -0.99361500 |
| C | 7.47365300  | -0.97797800 | 0.24168100  |
| H | 7.07808100  | -3.04497600 | 0.57315200  |
| C | 5.76811500  | 0.26802300  | -0.90910300 |
| H | 4.02299200  | -0.80348600 | -1.50165900 |
| C | 7.01630300  | 0.22712200  | -0.29413300 |
| H | 8.44902700  | -1.03327700 | 0.71828800  |
| H | 5.39540000  | 1.19461600  | -1.32928900 |
| H | 7.63067900  | 1.12162400  | -0.23841300 |
| C | 5.38575200  | -4.41131300 | -1.49435500 |
| H | 4.85831500  | -5.37656500 | -1.45672900 |
| H | 6.38273700  | -4.57973700 | -1.07261500 |
| C | 5.52488900  | -3.97655400 | -2.92994800 |
| C | 6.68113000  | -3.65900900 | -3.51231400 |
| H | 7.62268200  | -3.68276300 | -2.96769700 |
| H | 6.73028400  | -3.35866000 | -4.55515700 |
| H | 3.79148200  | -2.24742600 | 1.86402400  |
| H | 4.61045800  | -3.93803500 | -3.52148000 |

TS-EF-3RS

l imaginary frequency

H = -5236.777802

G = -5236.971142

E(M06-2X-DCM) = -5237.617108

E(M06-2X-cyclohexane) = -5237.588825

|   |             |             |             |
|---|-------------|-------------|-------------|
| O | 0.22136400  | -2.91452500 | 0.04511400  |
| O | 2.38653600  | -1.52382600 | -0.17619900 |
| P | 0.76350500  | -1.37854000 | -0.14337700 |
| O | 0.41812300  | -0.50201400 | 1.02151100  |
| C | 1.44383000  | -4.96263800 | 3.48723200  |
| C | 2.23358800  | -4.96160700 | 2.34222300  |
| C | 1.79522600  | -4.32773400 | 1.16955400  |
| C | -0.23112800 | -3.60865600 | 2.32739100  |
| C | 0.21239600  | -4.30806400 | 3.46212700  |
| C | 2.99902100  | -2.25036600 | -1.19925400 |
| C | 3.03840600  | -3.64166700 | -1.12816400 |
| C | 3.48443700  | -4.36664800 | -2.24473500 |
| C | 4.00509300  | -3.71051400 | -3.35509900 |
| C | 4.08435200  | -2.31720700 | -3.34493600 |
| C | 3.57287500  | -1.55535100 | -2.28190300 |
| H | -0.41943800 | -4.31005900 | 4.34567500  |
| H | 4.52899200  | -1.79436500 | -4.18659900 |
| C | 2.76852700  | -4.60305800 | 0.02792900  |
| C | 4.08166000  | -4.86014800 | 0.84621600  |
| H | 4.53628000  | -3.89358500 | 1.09218600  |
| H | 4.81809600  | -5.44088000 | 0.28244500  |
| H | 4.25268500  | -6.35760400 | -1.84274000 |
| H | 2.83716400  | -6.34759100 | -2.88858100 |
| C | 0.59575800  | -3.61928000 | 1.18786400  |
| H | 1.77931100  | -5.45987200 | 4.39390200  |
| H | 4.35906100  | -4.27080300 | -4.21694600 |
| C | 3.61046800  | -5.55472800 | 2.14124600  |
| H | 4.27792200  | -5.36702900 | 2.98998400  |
| H | 3.55959100  | -6.64552500 | 2.01495800  |
| C | 3.29347600  | -5.85248500 | -2.02368300 |
| C | 2.38970700  | -5.89370800 | -0.77069300 |
| H | 1.33736200  | -5.82618700 | -1.06947600 |
| H | 2.51194400  | -6.80475300 | -0.17614300 |
| C | 3.69187100  | -0.06395500 | -2.30414200 |
| C | 3.02308300  | 0.69305700  | -3.29739600 |
| C | 4.53712200  | 0.58203000  | -1.36596400 |
| C | 2.13979800  | 0.10606500  | -4.25997700 |
| C | 3.20855000  | 2.12649900  | -3.34707200 |
| C | 4.68895500  | 2.01863000  | -1.41135700 |

|   |              |              |              |
|---|--------------|--------------|--------------|
| C | 1. 52360900  | 0. 86606500  | -5. 21857900 |
| H | 1. 93120600  | -0. 95489900 | -4. 20036400 |
| C | 2. 54915100  | 2. 88221800  | -4. 36688900 |
| C | 4. 02262300  | 2. 75033300  | -2. 39817000 |
| C | 1. 73761200  | 2. 27190600  | -5. 28414900 |
| H | 0. 84389700  | 0. 39482800  | -5. 92260300 |
| H | 2. 71169400  | 3. 95747300  | -4. 39463400 |
| H | 4. 13468900  | 3. 83217700  | -2. 42369600 |
| H | 1. 24300000  | 2. 85649000  | -6. 05563800 |
| C | -1. 54618800 | -2. 89635300 | 2. 37287500  |
| C | -1. 70755800 | -1. 77414800 | 3. 22156200  |
| C | -2. 64219700 | -3. 38384200 | 1. 62054300  |
| C | -0. 62557900 | -1. 20506500 | 3. 96955900  |
| C | -3. 00403800 | -1. 14591900 | 3. 33694500  |
| C | -3. 92712600 | -2. 73121700 | 1. 72529700  |
| C | -0. 81247100 | -0. 12141600 | 4. 78836800  |
| H | 0. 36261900  | -1. 63546800 | 3. 86311200  |
| C | -3. 15968400 | -0. 02408000 | 4. 21253500  |
| C | -4. 07630400 | -1. 64084500 | 2. 58798200  |
| C | -2. 09990100 | 0. 47516500  | 4. 92088100  |
| H | 0. 03079800  | 0. 29286200  | 5. 33528600  |
| H | -4. 14731700 | 0. 42338600  | 4. 30407000  |
| H | -5. 05346800 | -1. 16996400 | 2. 67955700  |
| H | -2. 23320200 | 1. 32743700  | 5. 58200900  |
| C | 6. 07881200  | 0. 52916100  | 0. 53299100  |
| H | 6. 62566500  | -0. 03690500 | 1. 28218000  |
| C | 5. 28040700  | -0. 12633300 | -0. 36714500 |
| H | 5. 21004400  | -1. 20722800 | -0. 33000300 |
| C | 6. 20234000  | 1. 94678100  | 0. 49885900  |
| H | 6. 83656100  | 2. 44927400  | 1. 22429800  |
| C | 5. 53044100  | 2. 66592900  | -0. 45218900 |
| H | 5. 61463500  | 3. 74891600  | -0. 49194500 |
| C | -3. 62503500 | -4. 97044400 | 0. 04409800  |
| H | -3. 52205300 | -5. 83683600 | -0. 60371000 |
| C | -4. 88300400 | -4. 31016000 | 0. 13605300  |
| H | -5. 72544700 | -4. 67418700 | -0. 44599600 |
| C | -5. 02731100 | -3. 22462700 | 0. 95654400  |
| H | -5. 98202100 | -2. 71009400 | 1. 03476900  |
| C | -2. 54635700 | -4. 52505800 | 0. 76165600  |
| H | -1. 59735900 | -5. 04278900 | 0. 68322100  |
| N | 0. 32497500  | -0. 96299700 | -1. 64429100 |
| S | -1. 14694600 | -0. 71830900 | -2. 13980900 |
| O | -1. 22285600 | 0. 35270500  | -3. 14774200 |
| O | -2. 17517200 | -0. 65760700 | -1. 05810100 |

|   |             |             |             |
|---|-------------|-------------|-------------|
| C | -1.58803300 | -2.26459800 | -3.09206300 |
| F | -0.72154200 | -2.43950300 | -4.09750600 |
| F | -2.81965000 | -2.13532900 | -3.60277800 |
| F | -1.55684200 | -3.33707000 | -2.29935900 |
| C | -4.93464800 | 2.17221700  | -0.47240700 |
| C | -4.21849200 | 2.11520600  | -1.85707500 |
| H | -4.91526800 | 2.51111100  | -2.60947800 |
| H | -4.01632100 | 1.06999300  | -2.10158300 |
| C | -2.93077800 | 2.86649000  | -2.00134400 |
| C | -3.91653200 | 1.76312000  | 0.66229800  |
| H | -4.05328800 | 2.40583000  | 1.53380400  |
| H | -4.11550300 | 0.73235800  | 0.96264400  |
| N | -2.48885600 | 1.77870800  | 0.30662700  |
| C | -1.55034100 | 2.59889200  | 0.83370300  |
| N | -0.32242800 | 2.09316000  | 0.99653800  |
| C | 0.86179800  | 2.78616200  | 1.37487700  |
| C | 1.33098100  | 3.90405900  | 0.68447400  |
| C | 1.60385600  | 2.24641900  | 2.42966400  |
| C | 2.52650000  | 4.50308700  | 1.08254800  |
| C | 2.79733200  | 2.85378400  | 2.81342400  |
| H | 1.24331000  | 1.35762300  | 2.93433600  |
| C | 3.26152300  | 3.98976500  | 2.15027800  |
| H | 4.19029000  | 4.45852400  | 2.45161500  |
| C | 3.62480500  | 2.24926500  | 3.91816500  |
| C | 3.00694900  | 5.73487800  | 0.36173400  |
| F | 2.86576900  | 1.53894800  | 4.78270600  |
| F | 4.56906800  | 1.41260500  | 3.43761200  |
| F | 4.26872200  | 3.20157200  | 4.63061400  |
| F | 2.45125100  | 6.86010100  | 0.86328400  |
| F | 4.34849300  | 5.88331100  | 0.45449400  |
| F | 2.69531300  | 5.69771500  | -0.95485000 |
| S | -1.95263500 | 4.26078100  | 1.13344900  |
| H | 0.78298300  | 4.29306900  | -0.16374000 |
| H | -0.19241500 | 1.05384300  | 0.96455200  |
| H | -2.16610500 | 0.86645000  | -0.05541800 |
| C | -2.74172500 | 4.22689800  | -1.81687100 |
| H | -3.60881600 | 4.88575100  | -1.81389200 |
| H | -2.44699900 | 4.29317000  | -0.47364700 |
| H | -1.82921400 | 4.66370100  | -2.22272400 |
| C | -5.50386200 | 3.59712500  | -0.15748600 |
| H | -4.68819500 | 4.29980900  | 0.02952100  |
| H | -6.04502900 | 3.51710800  | 0.79553100  |
| C | -6.11973000 | 1.18117800  | -0.43643500 |
| C | -6.58829300 | 0.48894900  | -1.56099400 |



|   |             |             |             |
|---|-------------|-------------|-------------|
| C | -6.78881500 | 0.96510800  | 0.78251600  |
| C | -7.67518300 | -0.38575800 | -1.47240900 |
| H | -6.10992500 | 0.61374500  | -2.52561900 |
| C | -7.87101300 | 0.09187500  | 0.87627500  |
| H | -6.46388300 | 1.48666900  | 1.67943700  |
| C | -8.32175000 | -0.59048600 | -0.25582500 |
| H | -8.01057900 | -0.90836600 | -2.36408000 |
| H | -8.36480900 | -0.05032700 | 1.83397100  |
| H | -9.16725700 | -1.26937000 | -0.18852000 |
| C | -6.44415200 | 4.15120400  | -1.19366900 |
| C | -6.39498500 | 5.39138200  | -1.68507600 |
| H | -5.64280200 | 6.11027100  | -1.36426300 |
| H | -7.12001000 | 5.74677500  | -2.41219700 |
| H | -7.23285400 | 3.47930800  | -1.53254200 |
| H | -2.08290200 | 2.26773800  | -2.33259300 |

TS-EF-3RS-1

l imaginary frequency

H = -5236.773922

G = -5236.966676

E(M06-2X-DCM) = -5237.613115

E(M06-2X-cyclohexane) = -5237.585177

|   |             |            |             |
|---|-------------|------------|-------------|
| O | -0.04992200 | 2.89440900 | 0.15340700  |
| O | -2.26136300 | 1.60998100 | -0.21032500 |
| P | -0.64833600 | 1.39430400 | -0.12884400 |
| O | -0.37929800 | 0.44345300 | 0.99548600  |
| C | -1.34707400 | 4.86736200 | 3.61260400  |
| C | -2.07828000 | 4.94699400 | 2.43208900  |
| C | -1.61361600 | 4.33559400 | 1.25751200  |
| C | 0.31914000  | 3.47966600 | 2.48089500  |
| C | -0.14755200 | 4.15579200 | 3.62032700  |
| C | -2.80559800 | 2.39591200 | -1.22789600 |
| C | -2.78330100 | 3.78415100 | -1.11350500 |
| C | -3.15095100 | 4.56274200 | -2.22237600 |
| C | -3.65941500 | 3.96527500 | -3.37103700 |
| C | -3.80730100 | 2.57760600 | -3.40668100 |
| C | -3.37312400 | 1.76119900 | -2.34994900 |
| H | 0.43965000  | 4.09478100 | 4.53211600  |
| H | -4.24631300 | 2.10240600 | -4.27902200 |
| C | -2.51933000 | 4.69519600 | 0.08362800  |
| C | -3.85580000 | 4.98767800 | 0.85128200  |
| H | -4.36579800 | 4.03635800 | 1.04187700  |
| H | -4.53745500 | 5.62173200 | 0.27621200  |
| H | -3.83889700 | 6.57667200 | -1.78954700 |

|   |             |             |             |
|---|-------------|-------------|-------------|
| H | -2.38187900 | 6.52755300  | -2.77528700 |
| C | -0.44962300 | 3.57094000  | 1.30493500  |
| H | -1.70365900 | 5.34624900  | 4.52106300  |
| H | -3.95297300 | 4.56704400  | -4.22758300 |
| C | -3.41381900 | 5.61430800  | 2.19011500  |
| H | -4.12897700 | 5.43208100  | 3.00027500  |
| H | -3.30411900 | 6.70479000  | 2.10497400  |
| C | -2.89829600 | 6.03024600  | -1.94619000 |
| C | -2.04782100 | 5.99038700  | -0.65580900 |
| H | -0.98772700 | 5.88314200  | -0.91258500 |
| H | -2.15425000 | 6.88752200  | -0.03752300 |
| C | -3.56529500 | 0.27860800  | -2.41373100 |
| C | -2.89704400 | -0.49077600 | -3.39763700 |
| C | -4.47413600 | -0.34387300 | -1.51982300 |
| C | -1.95296200 | 0.07151600  | -4.31632600 |
| C | -3.14704900 | -1.91290000 | -3.48238600 |
| C | -4.69133900 | -1.77048800 | -1.59956200 |
| C | -1.33746000 | -0.69900100 | -5.26701700 |
| H | -1.69975200 | 1.12086200  | -4.22920200 |
| C | -2.48576800 | -2.68012100 | -4.49246900 |
| C | -4.02346300 | -2.51487600 | -2.57585400 |
| C | -1.61333400 | -2.09205300 | -5.36756700 |
| H | -0.61225700 | -0.24739400 | -5.93768600 |
| H | -2.69804500 | -3.74562300 | -4.54847200 |
| H | -4.18429600 | -3.58971700 | -2.62574300 |
| H | -1.11909800 | -2.68489600 | -6.13303400 |
| C | 1.60168900  | 2.71206700  | 2.56128100  |
| C | 1.67209400  | 1.54027300  | 3.35289000  |
| C | 2.75960400  | 3.20211000  | 1.91062500  |
| C | 0.52984400  | 0.98106300  | 4.01327300  |
| C | 2.93467500  | 0.85261900  | 3.50212700  |
| C | 4.01502700  | 2.50345800  | 2.06477000  |
| C | 0.62881200  | -0.15210300 | 4.77858000  |
| H | -0.43238800 | 1.46139100  | 3.88416300  |
| C | 2.99635600  | -0.32521400 | 4.31325600  |
| C | 4.06960300  | 1.35192900  | 2.85594200  |
| C | 1.88065400  | -0.81458300 | 4.93720900  |
| H | -0.25842200 | -0.55638400 | 5.25909700  |
| H | 3.95723400  | -0.82299900 | 4.42470100  |
| H | 5.02227300  | 0.84047500  | 2.98254200  |
| H | 1.94255300  | -1.70905300 | 5.55134500  |
| C | -6.07876500 | -0.25320500 | 0.32488800  |
| H | -6.62497000 | 0.32421600  | 1.06581000  |
| C | -5.21882500 | 0.38022300  | -0.53341900 |

|   |             |             |             |
|---|-------------|-------------|-------------|
| H | -5.09944500 | 1.45565200  | -0.47183300 |
| C | -6.26766100 | -1.66229700 | 0.25718700  |
| H | -6.95135500 | -2.14762500 | 0.94862100  |
| C | -5.59644200 | -2.39479500 | -0.68414400 |
| H | -5.73093700 | -3.47140500 | -0.74861400 |
| C | 3.89715200  | 4.85309600  | 0.51285900  |
| H | 3.86448900  | 5.75963000  | -0.08538500 |
| C | 5.13075400  | 4.15848500  | 0.66556000  |
| H | 6.02773100  | 4.54321000  | 0.18714500  |
| C | 5.18412800  | 3.01823300  | 1.42154500  |
| H | 6.12031600  | 2.48038400  | 1.54981000  |
| C | 2.75625400  | 4.39329800  | 1.11611900  |
| H | 1.82781900  | 4.94003100  | 0.99779000  |
| N | -0.17128400 | 1.03998500  | -1.63680100 |
| S | 1.30428600  | 0.71814100  | -2.06721100 |
| O | 1.37093700  | -0.30934700 | -3.12033500 |
| O | 2.26026500  | 0.53458600  | -0.93154400 |
| C | 1.91202800  | 2.27245200  | -2.90761100 |
| F | 1.13759700  | 2.54930100  | -3.96272900 |
| F | 3.16886300  | 2.08403800  | -3.33030900 |
| F | 1.88762000  | 3.30612600  | -2.06464800 |
| C | 4.76224400  | -2.58855800 | -0.75739600 |
| C | 3.95144400  | -2.53612400 | -2.11564100 |
| H | 4.58921500  | -3.00899100 | -2.87562700 |
| H | 3.83431100  | -1.49057200 | -2.40349100 |
| C | 2.59601400  | -3.16704700 | -2.17004200 |
| C | 3.83220400  | -2.18858100 | 0.45344900  |
| H | 3.93788600  | -2.93006600 | 1.24397400  |
| H | 4.14114000  | -1.22325700 | 0.85890300  |
| N | 2.39547000  | -2.05166500 | 0.16143900  |
| C | 1.40845500  | -2.79669500 | 0.71511400  |
| N | 0.22644200  | -2.19449100 | 0.90366900  |
| C | -1.00744100 | -2.79677600 | 1.27865500  |
| C | -1.55231400 | -3.88109800 | 0.58988600  |
| C | -1.71880200 | -2.19805800 | 2.32272800  |
| C | -2.79159100 | -4.38956100 | 0.97922500  |
| C | -2.95771800 | -2.71395000 | 2.69678300  |
| H | -1.30014500 | -1.33395900 | 2.82474000  |
| C | -3.49783000 | -3.81743600 | 2.03630800  |
| H | -4.46153700 | -4.21471400 | 2.33040400  |
| C | -3.75256200 | -2.03977500 | 3.78484700  |
| C | -3.35137500 | -5.58709200 | 0.25840500  |
| F | -2.95478600 | -1.38565700 | 4.65992200  |
| F | -4.61920000 | -1.13385200 | 3.28422400  |

|   |             |             |             |
|---|-------------|-------------|-------------|
| F | -4.48151300 | -2.93341600 | 4.49115800  |
| F | -2.86953500 | -6.74656500 | 0.75802700  |
| F | -4.69952800 | -5.64851300 | 0.35010400  |
| F | -3.03752000 | -5.56936900 | -1.05894200 |
| S | 1.68074300  | -4.48380700 | 1.01354400  |
| H | -1.02771500 | -4.31489100 | -0.25109700 |
| H | 0.17527800  | -1.15002500 | 0.88566200  |
| H | 2.14362500  | -1.09870000 | -0.14864300 |
| C | 2.28985500  | -4.50920600 | -1.97596600 |
| H | 3.08623000  | -5.24986100 | -2.04593500 |
| H | 2.08092300  | -4.56070400 | -0.64691800 |
| H | 1.31789100  | -4.85354700 | -2.33022600 |
| C | 5.27309300  | -4.03584000 | -0.51637200 |
| H | 5.82561000  | -4.38088400 | -1.40266400 |
| H | 4.39813700  | -4.69215900 | -0.45667300 |
| C | 5.91156600  | -1.57376900 | -0.95712100 |
| C | 5.63548700  | -0.19498500 | -0.95683100 |
| C | 7.22280000  | -1.97650400 | -1.24961700 |
| C | 6.63572400  | 0.74095800  | -1.21946000 |
| H | 4.62649100  | 0.16733600  | -0.77985300 |
| C | 8.22549500  | -1.04020500 | -1.51142000 |
| H | 7.48654600  | -3.02755400 | -1.25865500 |
| C | 7.93842300  | 0.32345700  | -1.49521100 |
| H | 6.38390000  | 1.79747100  | -1.21126800 |
| H | 9.23348900  | -1.38493600 | -1.72700300 |
| H | 8.71844600  | 1.05179500  | -1.70033300 |
| C | 6.10103700  | -4.34551900 | 0.71173200  |
| C | 6.59394000  | -3.51969600 | 1.63611200  |
| H | 6.47036800  | -2.44209600 | 1.59382000  |
| H | 7.16182700  | -3.90629400 | 2.47805400  |
| H | 6.28799100  | -5.41384100 | 0.83294300  |
| H | 1.78517300  | -2.48765200 | -2.42976100 |

TS-EF-3RS-2

l imaginary frequency

H = -5236.772627

G = -5236.964743

E(M06-2X-DCM) = -5237.607262

E(M06-2X-cyclohexane) = -5237.578305

|   |            |            |             |
|---|------------|------------|-------------|
| O | 0.00666800 | 3.02177500 | -0.06209400 |
| O | 2.17949500 | 1.62658800 | 0.23971400  |
| P | 0.55319300 | 1.50769600 | 0.24048300  |
| O | 0.19220000 | 0.55479100 | -0.85958800 |
| C | 1.28442200 | 4.98652000 | -3.53123100 |

|   |              |              |              |
|---|--------------|--------------|--------------|
| C | 2. 04315000  | 5. 03091300  | -2. 36641500 |
| C | 1. 59104100  | 4. 41259100  | -1. 19055600 |
| C | -0. 39249200 | 3. 62794200  | -2. 38024600 |
| C | 0. 06804200  | 4. 30461200  | -3. 52181800 |
| C | 2. 83549800  | 2. 38310900  | 1. 21146500  |
| C | 2. 83204000  | 3. 77398900  | 1. 12858900  |
| C | 3. 29013900  | 4. 51892400  | 2. 22680300  |
| C | 3. 88668400  | 3. 88620700  | 3. 31264600  |
| C | 4. 03976700  | 2. 49880500  | 3. 28999800  |
| C | 3. 50919000  | 1. 71387000  | 2. 25292000  |
| H | -0. 54054200 | 4. 27072200  | -4. 42093200 |
| H | 4. 56315000  | 1. 99961500  | 4. 10014200  |
| C | 2. 53568100  | 4. 72228400  | -0. 03313100 |
| C | 3. 85805400  | 5. 00377600  | -0. 83205900 |
| H | 4. 34185500  | 4. 04604500  | -1. 05662000 |
| H | 4. 56887100  | 5. 60957200  | -0. 26218000 |
| H | 3. 96942000  | 6. 54351600  | 1. 82774300  |
| H | 2. 55892200  | 6. 46631200  | 2. 87724100  |
| C | 0. 40384600  | 3. 68363300  | -1. 22053000 |
| H | 1. 63231100  | 5. 47067800  | -4. 44027000 |
| H | 4. 25340500  | 4. 46135500  | 4. 15916600  |
| C | 3. 39656300  | 5. 66734300  | -2. 14515900 |
| H | 4. 08824800  | 5. 49004400  | -2. 97656100 |
| H | 3. 30916900  | 6. 75747700  | -2. 03362700 |
| C | 3. 03392900  | 5. 99600700  | 2. 00862300  |
| C | 2. 12203500  | 6. 00461100  | 0. 75902500  |
| H | 1. 07336300  | 5. 90886100  | 1. 06190000  |
| H | 2. 21783600  | 6. 91565600  | 0. 15952500  |
| C | 3. 73231900  | 0. 23381500  | 2. 23428600  |
| C | 3. 22672400  | -0. 58799400 | 3. 27239200  |
| C | 4. 52897700  | -0. 33576700 | 1. 20614800  |
| C | 2. 42063400  | -0. 08141000 | 4. 34189000  |
| C | 3. 51454100  | -2. 00578300 | 3. 26868600  |
| C | 4. 77911000  | -1. 75950200 | 1. 19906000  |
| C | 1. 98124000  | -0. 89604200 | 5. 35285100  |
| H | 2. 13788300  | 0. 96389500  | 4. 33200800  |
| C | 3. 03051900  | -2. 82169500 | 4. 33904000  |
| C | 4. 26240300  | -2. 55538500 | 2. 22472400  |
| C | 2. 29704600  | -2. 28394500 | 5. 36160700  |
| H | 1. 36506300  | -0. 48193800 | 6. 14565900  |
| H | 3. 26908600  | -3. 88284400 | 4. 32304000  |
| H | 4. 44806700  | -3. 62730300 | 2. 21048900  |
| H | 1. 94359600  | -2. 91245400 | 6. 17498400  |
| C | -1. 70001900 | 2. 90154300  | -2. 44368400 |

|   |             |             |             |
|---|-------------|-------------|-------------|
| C | -1.81806400 | 1.73219000  | -3.23293800 |
| C | -2.83462700 | 3.43405800  | -1.78522500 |
| C | -0.70453100 | 1.14000400  | -3.91321300 |
| C | -3.10382200 | 1.08492400  | -3.36441900 |
| C | -4.11453100 | 2.77746300  | -1.92464500 |
| C | -0.85086000 | 0.01271700  | -4.67989300 |
| H | 0.27303800  | 1.59386900  | -3.80309300 |
| C | -3.21385400 | -0.09160300 | -4.17243200 |
| C | -4.21464200 | 1.62317100  | -2.70751400 |
| C | -2.12399100 | -0.61342500 | -4.81558200 |
| H | 0.01396000  | -0.41413700 | -5.18106800 |
| H | -4.19110200 | -0.55995900 | -4.26787500 |
| H | -5.18428300 | 1.14139100  | -2.81992100 |
| H | -2.22292600 | -1.50482700 | -5.42935600 |
| C | 5.89244200  | -0.14093400 | -0.81659700 |
| H | 6.33563400  | 0.47663900  | -1.59296600 |
| C | 5.13543400  | 0.44063700  | 0.16614200  |
| H | 4.99706500  | 1.51527400  | 0.16560300  |
| C | 6.10776700  | -1.54762500 | -0.83374000 |
| H | 6.70541100  | -1.99084700 | -1.62564300 |
| C | 5.56971500  | -2.32973800 | 0.15169300  |
| H | 5.72623300  | -3.40542400 | 0.15517100  |
| C | -3.90231700 | 5.12991000  | -0.38738800 |
| H | -3.83237900 | 6.03455500  | 0.21008400  |
| C | -5.16031200 | 4.47794200  | -0.52690200 |
| H | -6.03878000 | 4.89524500  | -0.04164500 |
| C | -5.25986900 | 3.33582800  | -1.27516800 |
| H | -6.21483700 | 2.82942000  | -1.39231500 |
| C | -2.78283000 | 4.62782500  | -0.99639800 |
| H | -1.83426100 | 5.14000000  | -0.88412000 |
| N | 0.10009000  | 1.21905900  | 1.76441200  |
| S | -1.40353500 | 1.26589400  | 2.24538000  |
| O | -2.32401200 | 0.42168000  | 1.41945100  |
| O | -1.92994800 | 2.57032100  | 2.65147500  |
| C | -1.27526700 | 0.28953100  | 3.82588800  |
| F | -0.71295500 | -0.91337300 | 3.61063400  |
| F | -2.51643400 | 0.08418500  | 4.29814800  |
| F | -0.56994800 | 0.94138200  | 4.75093600  |
| C | -4.85944000 | -2.35077000 | 0.71952400  |
| C | -4.08716600 | -2.46852500 | 2.09324900  |
| H | -4.76436500 | -2.98341500 | 2.78872600  |
| H | -3.92751600 | -1.46089400 | 2.48037300  |
| C | -2.76990600 | -3.17622000 | 2.09403700  |
| C | -3.87591100 | -1.89058600 | -0.41977300 |

|   |             |             |             |
|---|-------------|-------------|-------------|
| H | -4.02021200 | -2.52741000 | -1.29249600 |
| H | -4.09599900 | -0.86607400 | -0.72247000 |
| N | -2.43979300 | -1.90465600 | -0.08333000 |
| C | -1.49570400 | -2.64346800 | -0.72060700 |
| N | -0.28977700 | -2.08300800 | -0.86785400 |
| C | 0.89345900  | -2.70874900 | -1.35221100 |
| C | 1.45338800  | -3.82282600 | -0.72618500 |
| C | 1.53908700  | -2.11166400 | -2.43810000 |
| C | 2.64442100  | -4.35849400 | -1.21584600 |
| C | 2.72665800  | -2.66026800 | -2.91916800 |
| H | 1.10569000  | -1.22860100 | -2.89328400 |
| C | 3.28207600  | -3.78925400 | -2.31776600 |
| H | 4.20699700  | -4.21004800 | -2.69261400 |
| C | 3.44931400  | -1.99573300 | -4.06241800 |
| C | 3.23096700  | -5.57737800 | -0.55429400 |
| F | 2.59531400  | -1.34798700 | -4.88810500 |
| F | 4.34619200  | -1.08446500 | -3.62834600 |
| F | 4.12989100  | -2.89477500 | -4.80782300 |
| F | 2.70422300  | -6.72104600 | -1.04407300 |
| F | 4.57010600  | -5.65195800 | -0.73226900 |
| F | 3.00139000  | -5.58008300 | 0.78003500  |
| S | -1.85027600 | -4.28052800 | -1.16449400 |
| H | 0.97744900  | -4.25597700 | 0.14435900  |
| H | -0.20590700 | -1.03933900 | -0.78413400 |
| H | -2.12271400 | -1.01545400 | 0.33491800  |
| C | -2.54296900 | -4.51620000 | 1.79254200  |
| H | -3.38824900 | -5.20386600 | 1.79666900  |
| H | -2.30593800 | -4.47764000 | 0.47733400  |
| H | -1.60328000 | -4.95058000 | 2.13463000  |
| C | -5.44764500 | -3.73933000 | 0.30884800  |
| H | -6.05821900 | -4.12407100 | 1.13713800  |
| H | -4.62315800 | -4.44433900 | 0.18037100  |
| C | -5.96988300 | -1.30423400 | 0.97665700  |
| C | -5.65004700 | 0.06338200  | 1.03949200  |
| C | -7.29245800 | -1.67477600 | 1.26712100  |
| C | -6.61802100 | 1.01862300  | 1.34975900  |
| H | -4.63026000 | 0.40155300  | 0.88320900  |
| C | -8.26398000 | -0.71938400 | 1.57431600  |
| H | -7.58980600 | -2.71761100 | 1.26100900  |
| C | -7.93334200 | 0.63369900  | 1.61162800  |
| H | -6.32988000 | 2.06495300  | 1.38911800  |
| H | -9.27999800 | -1.04160100 | 1.78712800  |
| H | -8.68802400 | 1.37774000  | 1.85186700  |
| C | -6.25637100 | -3.74317000 | -0.96559900 |

|   |             |             |             |
|---|-------------|-------------|-------------|
| C | -5.97783700 | -4.50050700 | -2.02878200 |
| H | -5.12027600 | -5.16959000 | -2.05080400 |
| H | -6.60039500 | -4.48035100 | -2.91945300 |
| H | -7.12136700 | -3.08376700 | -1.00141000 |
| H | -1.91653500 | -2.58332500 | 2.41320800  |

TS-EF-3RS-3

1 imaginary frequency

H = -5236.774497

G = -5236.968286

E(M06-2X-DCM) = -5237.613533

E(M06-2X-cyclohexane) = -5237.585161

|   |             |             |             |
|---|-------------|-------------|-------------|
| O | 0.19753800  | -2.90572200 | 0.18509000  |
| O | 2.37194000  | -1.53262800 | -0.05156900 |
| P | 0.74877200  | -1.38614600 | -0.08934700 |
| O | 0.36121700  | -0.43050800 | 0.99700500  |
| C | 1.31194900  | -4.73658200 | 3.78326300  |
| C | 2.13340700  | -4.81083700 | 2.66326100  |
| C | 1.73270800  | -4.24896200 | 1.44140700  |
| C | -0.32098100 | -3.45041400 | 2.49384600  |
| C | 0.08616000  | -4.07876500 | 3.68242900  |
| C | 3.01971500  | -2.32000500 | -1.00556200 |
| C | 3.04887100  | -3.70488400 | -0.85273100 |
| C | 3.52796800  | -4.49509900 | -1.90971500 |
| C | 4.09131300  | -3.90637000 | -3.03691700 |
| C | 4.18121300  | -2.51514900 | -3.10298200 |
| C | 3.63792600  | -1.69115200 | -2.10403900 |
| H | -0.57031600 | -4.02236000 | 4.54599500  |
| H | 4.66004400  | -2.04377100 | -3.95621500 |
| C | 2.73743500  | -4.59634500 | 0.34787000  |
| C | 4.02437800  | -4.81024100 | 1.21884600  |
| H | 4.47823100  | -3.83292200 | 1.41961300  |
| H | 4.77298000  | -5.42757200 | 0.71298000  |
| H | 4.26857700  | -6.46414500 | -1.37040900 |
| H | 2.88668300  | -6.50602300 | -2.45938400 |
| C | 0.53719100  | -3.53613400 | 1.38092600  |
| H | 1.61857300  | -5.17798400 | 4.72823400  |
| H | 4.47081000  | -4.51689600 | -3.85252900 |
| C | 3.51098100  | -5.42285200 | 2.53880600  |
| H | 4.15514300  | -5.18851900 | 3.39391200  |
| H | 3.45532400  | -6.51896200 | 2.47641000  |
| C | 3.31929800  | -5.96481000 | -1.61006300 |
| C | 2.37610100  | -5.92954100 | -0.38603100 |
| H | 1.33408000  | -5.87531800 | -0.72141200 |



|   |              |              |              |
|---|--------------|--------------|--------------|
| H | 2. 47440900  | -6. 80499600 | 0. 26387600  |
| C | 3. 77168600  | -0. 20424000 | -2. 20370200 |
| C | 3. 14811400  | 0. 50226600  | -3. 26145800 |
| C | 4. 58754500  | 0. 48582800  | -1. 27073700 |
| C | 2. 29473600  | -0. 12972600 | -4. 22252600 |
| C | 3. 35080900  | 1. 92909500  | -3. 38332300 |
| C | 4. 75623100  | 1. 91631100  | -1. 38963400 |
| C | 1. 72297500  | 0. 58099100  | -5. 24442200 |
| H | 2. 07268000  | -1. 18385300 | -4. 11194600 |
| C | 2. 73809600  | 2. 63251900  | -4. 46765700 |
| C | 4. 13563400  | 2. 59765400  | -2. 44029600 |
| C | 1. 95472000  | 1. 97903400  | -5. 37971800 |
| H | 1. 06482500  | 0. 07723700  | -5. 94636700 |
| H | 2. 91361800  | 3. 70302200  | -4. 54903700 |
| H | 4. 26075400  | 3. 67525000  | -2. 52161300 |
| H | 1. 49604900  | 2. 52389800  | -6. 20093100 |
| C | -1. 63286900 | -2. 73216500 | 2. 45603900  |
| C | -1. 81167500 | -1. 55550000 | 3. 22339100  |
| C | -2. 70960300 | -3. 26485400 | 1. 70669000  |
| C | -0. 74890000 | -0. 94356800 | 3. 96496000  |
| C | -3. 10651300 | -0. 91444800 | 3. 25720600  |
| C | -3. 99306600 | -2. 60159500 | 1. 73008200  |
| C | -0. 95271600 | 0. 19320200  | 4. 70387300  |
| H | 0. 23886200  | -1. 38559400 | 3. 91867700  |
| C | -3. 28046800 | 0. 26475700  | 4. 05000000  |
| C | -4. 15939100 | -1. 45444200 | 2. 51217000  |
| C | -2. 23907100 | 0. 80447000  | 4. 75583200  |
| H | -0. 12301100 | 0. 63904400  | 5. 24661100  |
| H | -4. 26653400 | 0. 72386900  | 4. 07973700  |
| H | -5. 13613100 | -0. 97521800 | 2. 54603400  |
| H | -2. 38607000 | 1. 70026900  | 5. 35344600  |
| C | 6. 05473900  | 0. 52602700  | 0. 68676700  |
| H | 6. 56648900  | -0. 00203800 | 1. 48677900  |
| C | 5. 28481900  | -0. 17193300 | -0. 20623100 |
| H | 5. 20207800  | -1. 24845300 | -0. 11211700 |
| C | 6. 19459900  | 1. 93839300  | 0. 57888900  |
| H | 6. 80631600  | 2. 47528200  | 1. 29904200  |
| C | 5. 56736900  | 2. 60897600  | -0. 43604400 |
| H | 5. 66472500  | 3. 68722400  | -0. 53256400 |
| C | -3. 65606800 | -4. 95085100 | 0. 21321500  |
| H | -3. 53962800 | -5. 85941100 | -0. 37145300 |
| C | -4. 91226000 | -4. 28100000 | 0. 22392800  |
| H | -5. 73970500 | -4. 67962900 | -0. 35688700 |
| C | -5. 07338300 | -3. 14200300 | 0. 96487600  |

|   |             |             |             |
|---|-------------|-------------|-------------|
| H | -6.02651400 | -2.61902400 | 0.97875400  |
| C | -2.59581600 | -4.46188500 | 0.92981300  |
| H | -1.64791800 | -4.98730200 | 0.91398000  |
| N | 0.36751100  | -1.07774700 | -1.63143000 |
| S | -1.08299200 | -0.85270500 | -2.19441400 |
| O | -1.10744900 | 0.13918600  | -3.28308700 |
| O | -2.14573800 | -0.69418500 | -1.15700900 |
| C | -1.51834200 | -2.46100500 | -3.04050000 |
| F | -0.62091300 | -2.72504700 | -3.99808000 |
| F | -2.72916000 | -2.35350400 | -3.60234000 |
| F | -1.53202800 | -3.46906300 | -2.16690000 |
| C | -4.89974400 | 2.21444200  | -0.93353500 |
| C | -4.10446500 | 2.06820000  | -2.27450500 |
| H | -4.73651100 | 2.45576200  | -3.08451200 |
| H | -3.94045700 | 1.00425400  | -2.46328000 |
| C | -2.77936700 | 2.76165500  | -2.38295100 |
| C | -3.95059400 | 1.86696000  | 0.27188500  |
| H | -4.12804900 | 2.56007100  | 1.09573700  |
| H | -4.16906700 | 0.85611700  | 0.62111900  |
| N | -2.50440200 | 1.84541500  | -0.01494100 |
| C | -1.57716300 | 2.67623700  | 0.51705500  |
| N | -0.37117400 | 2.15857400  | 0.77771900  |
| C | 0.80703900  | 2.85158000  | 1.17591800  |
| C | 1.32857900  | 3.92530900  | 0.45365800  |
| C | 1.48882600  | 2.35500500  | 2.29095800  |
| C | 2.51338700  | 4.52663500  | 0.87932200  |
| C | 2.67338900  | 2.96288300  | 2.70062200  |
| H | 1.08963800  | 1.49818400  | 2.82102900  |
| C | 3.18805800  | 4.05719600  | 2.00538700  |
| H | 4.10923900  | 4.52689900  | 2.32766800  |
| C | 3.43797800  | 2.40049200  | 3.87092700  |
| C | 3.04591100  | 5.71525600  | 0.12356900  |
| F | 2.62539700  | 1.75577400  | 4.73884500  |
| F | 4.37950400  | 1.51716300  | 3.47691200  |
| F | 4.07528300  | 3.37469600  | 4.55920400  |
| F | 2.47834400  | 6.86973900  | 0.53788900  |
| F | 4.38239700  | 5.85583500  | 0.27870900  |
| F | 2.80224700  | 5.61431700  | -1.20416100 |
| S | -1.95374600 | 4.36250200  | 0.68399200  |
| H | 0.82939200  | 4.27922200  | -0.43873000 |
| H | -0.25850300 | 1.11762000  | 0.81366000  |
| H | -2.17998700 | 0.90547200  | -0.29780300 |
| C | -2.54646200 | 4.12647200  | -2.29983100 |
| H | -3.37936200 | 4.82085200  | -2.40350500 |

|   |             |             |             |
|---|-------------|-------------|-------------|
| H | -2.33505500 | 4.29541800  | -0.94951900 |
| H | -1.59343500 | 4.49456600  | -2.67958100 |
| C | -5.44451500 | 3.68494900  | -0.79289500 |
| H | -5.96852700 | 3.92699800  | -1.72828200 |
| H | -4.59791300 | 4.36836400  | -0.70442900 |
| C | -6.10638800 | 1.25082500  | -0.94254200 |
| C | -6.69556000 | 0.79437600  | -2.13096100 |
| C | -6.69851700 | 0.84386000  | 0.26685400  |
| C | -7.81403600 | -0.04190700 | -2.11493300 |
| H | -6.28472500 | 1.07490000  | -3.09441900 |
| C | -7.81850000 | 0.01234000  | 0.28745200  |
| H | -6.29595300 | 1.19264400  | 1.21250500  |
| C | -8.38164100 | -0.43973500 | -0.90637400 |
| H | -8.23669300 | -0.38341100 | -3.05596700 |
| H | -8.25216600 | -0.27729900 | 1.24116100  |
| H | -9.25153600 | -1.09040900 | -0.89360900 |
| C | -6.37590600 | 3.94715400  | 0.36227800  |
| C | -6.07063300 | 4.70235500  | 1.42039000  |
| H | -5.09723000 | 5.17652000  | 1.52633000  |
| H | -6.78724100 | 4.87920600  | 2.21834400  |
| H | -7.36487500 | 3.49730900  | 0.30054200  |
| H | -1.93685600 | 2.11077700  | -2.61335600 |

TS-EF-3RS-4

1 imaginary frequency

H = -5236.772441

G = -5236.967088

E(M06-2X-DCM) = -5237.612266

E(M06-2X-cyclohexane) = -5237.583121

|   |             |             |             |
|---|-------------|-------------|-------------|
| O | 0.27731800  | -2.90252300 | 0.16663500  |
| O | 2.42540500  | -1.48402200 | -0.04483200 |
| P | 0.80013000  | -1.37037400 | -0.09179700 |
| O | 0.38721900  | -0.43228700 | 1.00094400  |
| C | 1.39538400  | -4.72997600 | 3.76519500  |
| C | 2.22959700  | -4.77957300 | 2.65326800  |
| C | 1.82858400  | -4.22006200 | 1.43044300  |
| C | -0.25303800 | -3.47337000 | 2.46622000  |
| C | 0.15609300  | -4.09944400 | 3.65537600  |
| C | 3.09539000  | -2.25359700 | -0.99813000 |
| C | 3.15331600  | -3.63808600 | -0.84980100 |
| C | 3.65752800  | -4.41393900 | -1.90575800 |
| C | 4.21607900  | -3.80913400 | -3.02681300 |
| C | 4.27505700  | -2.41608100 | -3.08812700 |
| C | 3.70640600  | -1.60754100 | -2.09063600 |

|   |             |             |             |
|---|-------------|-------------|-------------|
| H | -0.51023500 | -4.06298400 | 4.51243800  |
| H | 4.74890600  | -1.93137000 | -3.93664700 |
| C | 2.85095200  | -4.54049800 | 0.34499500  |
| C | 4.13399100  | -4.72994300 | 1.22717800  |
| H | 4.56422300  | -3.74380800 | 1.43664600  |
| H | 4.90080300  | -5.32828500 | 0.72578300  |
| H | 4.43690100  | -6.36802200 | -1.36679500 |
| H | 3.06539100  | -6.43656000 | -2.46749000 |
| C | 0.61829400  | -3.53341600 | 1.36190600  |
| H | 1.70224100  | -5.16973500 | 4.71085500  |
| H | 4.61508800  | -4.40841800 | -3.84144700 |
| C | 3.62169800  | -5.36003300 | 2.53938000  |
| H | 4.25219300  | -5.11536700 | 3.40174600  |
| H | 3.59123000  | -6.45680600 | 2.47156100  |
| C | 3.47886800  | -5.88890300 | -1.61279300 |
| C | 2.52498600  | -5.87855400 | -0.39667700 |
| H | 1.48488500  | -5.84578200 | -0.74070900 |
| H | 2.63676600  | -6.75401900 | 0.25101600  |
| C | 3.80586400  | -0.11767700 | -2.18656900 |
| C | 3.17243900  | 0.57576600  | -3.24714800 |
| C | 4.59913900  | 0.58978700  | -1.24727600 |
| C | 2.34076800  | -0.07452800 | -4.21501400 |
| C | 3.34155000  | 2.00728500  | -3.36500000 |
| C | 4.73418400  | 2.02416300  | -1.36236400 |
| C | 1.75882200  | 0.62433800  | -5.23931100 |
| H | 2.14320400  | -1.13387700 | -4.10791100 |
| C | 2.71924200  | 2.69800500  | -4.45203200 |
| C | 4.10390700  | 2.69258000  | -2.41556100 |
| C | 1.95781600  | 2.02779300  | -5.37048600 |
| H | 1.11754500  | 0.10637400  | -5.94652600 |
| H | 2.86945300  | 3.77258700  | -4.53019700 |
| H | 4.20343100  | 3.77310100  | -2.49391300 |
| H | 1.49145000  | 2.56316500  | -6.19358400 |
| C | -1.58043700 | -2.78462900 | 2.41936100  |
| C | -1.79431800 | -1.61890000 | 3.19457100  |
| C | -2.63697100 | -3.33522900 | 1.65422000  |
| C | -0.75313800 | -0.98763000 | 3.95049700  |
| C | -3.10455300 | -1.00960800 | 3.22215400  |
| C | -3.93563100 | -2.70189600 | 1.67006500  |
| C | -0.99082700 | 0.13737600  | 4.69727300  |
| H | 0.24544800  | -1.40506100 | 3.90894800  |
| C | -3.31415400 | 0.15715500  | 4.02473000  |
| C | -4.13713800 | -1.56695600 | 2.46162500  |
| C | -2.29233700 | 0.71604900  | 4.74426100  |

|   |             |             |             |
|---|-------------|-------------|-------------|
| H | -0.17712700 | 0.59819500  | 5.25165200  |
| H | -4.31228600 | 0.58979300  | 4.05217500  |
| H | -5.12511600 | -1.11101600 | 2.48865300  |
| H | -2.46651200 | 1.60171300  | 5.34967000  |
| C | 6.05329700  | 0.66094600  | 0.71900700  |
| H | 6.57282300  | 0.14363900  | 1.52103100  |
| C | 5.30552500  | -0.05336400 | -0.17985400 |
| H | 5.24792400  | -1.13176100 | -0.08832000 |
| C | 6.15988000  | 2.07650400  | 0.61478000  |
| H | 6.75419500  | 2.62628400  | 1.33974300  |
| C | 5.52271600  | 2.73405100  | -0.40248500 |
| H | 5.59468200  | 3.81455700  | -0.49628300 |
| C | -3.52913600 | -5.02780900 | 0.13514600  |
| H | -3.38589200 | -5.92791600 | -0.45660300 |
| C | -4.80027400 | -4.38662100 | 0.13818200  |
| H | -5.61207700 | -4.79833200 | -0.45542200 |
| C | -4.99539000 | -3.25880700 | 0.88801700  |
| H | -5.96021800 | -2.75751900 | 0.89688200  |
| C | -2.48786700 | -4.52206700 | 0.86778200  |
| H | -1.52825100 | -5.02588300 | 0.85729400  |
| N | 0.42195200  | -1.05555000 | -1.63305000 |
| S | -1.02961300 | -0.86123100 | -2.20513900 |
| O | -1.07092700 | 0.14196300  | -3.28276000 |
| O | -2.10364600 | -0.74110800 | -1.17412100 |
| C | -1.41697600 | -2.47049300 | -3.07245800 |
| F | -0.50690100 | -2.69926200 | -4.02725000 |
| F | -2.62664300 | -2.38845900 | -3.64072400 |
| F | -1.40911100 | -3.48881700 | -2.21078200 |
| C | -4.93348300 | 2.12406300  | -0.86927800 |
| C | -4.16461400 | 2.00072900  | -2.22939900 |
| H | -4.81499700 | 2.40042900  | -3.01873200 |
| H | -4.00392900 | 0.93987600  | -2.43777400 |
| C | -2.83980800 | 2.69405500  | -2.35084700 |
| C | -3.95706300 | 1.74534800  | 0.30583100  |
| H | -4.12925900 | 2.38707700  | 1.16971100  |
| H | -4.15164900 | 0.71412200  | 0.60633100  |
| N | -2.51390800 | 1.76982200  | 0.00675400  |
| C | -1.61056200 | 2.62492000  | 0.54150600  |
| N | -0.38956600 | 2.14237500  | 0.79645000  |
| C | 0.76776000  | 2.86775200  | 1.19770200  |
| C | 1.25973100  | 3.95649300  | 0.47729600  |
| C | 1.46159500  | 2.38879000  | 2.31292800  |
| C | 2.42774900  | 4.58896700  | 0.90416600  |
| C | 2.62846900  | 3.02863800  | 2.72464800  |

|   |              |              |              |
|---|--------------|--------------|--------------|
| H | 1. 08537100  | 1. 52083100  | 2. 84179100  |
| C | 3. 11385800  | 4. 13690900  | 2. 03048800  |
| H | 4. 02185800  | 4. 63095900  | 2. 35383000  |
| C | 3. 40628300  | 2. 48688500  | 3. 89604300  |
| C | 2. 93024000  | 5. 79087600  | 0. 14868000  |
| F | 2. 61033000  | 1. 81829800  | 4. 76098500  |
| F | 4. 37356300  | 1. 63124800  | 3. 50307000  |
| F | 4. 01400200  | 3. 47810600  | 4. 58667500  |
| F | 2. 33555600  | 6. 93090400  | 0. 56462300  |
| F | 4. 26317100  | 5. 96328100  | 0. 30237800  |
| F | 2. 68751100  | 5. 68470600  | -1. 17872100 |
| S | -2. 04367300 | 4. 29642400  | 0. 72086600  |
| H | 0. 75142200  | 4. 29745300  | -0. 41507800 |
| H | -0. 24772700 | 1. 10416200  | 0. 82668400  |
| H | -2. 16400700 | 0. 84240100  | -0. 28653500 |
| C | -2. 60493900 | 4. 05861300  | -2. 27189100 |
| H | -3. 43491700 | 4. 75566300  | -2. 38132900 |
| H | -2. 40789600 | 4. 22928500  | -0. 91516800 |
| H | -1. 64918900 | 4. 42360800  | -2. 64767900 |
| C | -5. 49088200 | 3. 58712600  | -0. 71498000 |
| H | -6. 12504000 | 3. 78981000  | -1. 58655800 |
| H | -4. 64844000 | 4. 28296000  | -0. 75611100 |
| C | -6. 13542800 | 1. 15660300  | -0. 86229700 |
| C | -6. 71449500 | 0. 66198000  | -2. 03994700 |
| C | -6. 72922900 | 0. 78021400  | 0. 35509500  |
| C | -7. 82537200 | -0. 18393200 | -2. 00484400 |
| H | -6. 30201300 | 0. 91892900  | -3. 00927700 |
| C | -7. 83856100 | -0. 06406600 | 0. 39549900  |
| H | -6. 33351600 | 1. 15792500  | 1. 29222000  |
| C | -8. 39255100 | -0. 55452200 | -0. 78747300 |
| H | -8. 24127100 | -0. 55542400 | -2. 93752700 |
| H | -8. 27329200 | -0. 33109100 | 1. 35524500  |
| H | -9. 25592200 | -1. 21347200 | -0. 75957900 |
| C | -6. 26543400 | 3. 90656800  | 0. 53615900  |
| C | -7. 55184700 | 4. 25688600  | 0. 56352200  |
| H | -8. 15444700 | 4. 29531000  | -0. 34157300 |
| H | -8. 05300800 | 4. 51940600  | 1. 49128900  |
| H | -5. 70570900 | 3. 89900200  | 1. 47195500  |
| H | -1. 99805500 | 2. 04365400  | -2. 58503200 |

TS-EF-3RS-5

l imaginary frequency

H = -5236. 765448

G = -5236. 961812

E(M06-2X-DCM) = -5237.610838

E(M06-2X-cyclohexane) = -5237.580322

|   |             |             |             |
|---|-------------|-------------|-------------|
| O | 2.69666000  | -1.66351500 | -0.29255100 |
| O | 2.14757200  | 0.67070900  | -1.26492600 |
| P | 1.51130100  | -0.53928600 | -0.35644100 |
| O | 1.17711600  | 0.08441200  | 0.96914500  |
| C | 6.33256500  | -0.62228300 | 1.49527700  |
| C | 6.07916900  | -0.30091300 | 0.16529100  |
| C | 4.89158100  | -0.71661100 | -0.45659600 |
| C | 4.15287600  | -1.72689300 | 1.64323200  |
| C | 5.38594900  | -1.35874300 | 2.20827900  |
| C | 2.52851000  | 0.44385500  | -2.58663300 |
| C | 3.75740700  | -0.15943100 | -2.85208000 |
| C | 4.05911600  | -0.53798100 | -4.17028200 |
| C | 3.20877200  | -0.20340200 | -5.21841600 |
| C | 2.04648100  | 0.51735000  | -4.94430100 |
| C | 1.66995100  | 0.84344600  | -3.63099100 |
| H | 5.58732700  | -1.64406100 | 3.23665600  |
| H | 1.39325800  | 0.81928500  | -5.75766200 |
| C | 4.96315000  | -0.43528900 | -1.95457400 |
| C | 5.95405300  | 0.77905700  | -1.95666200 |
| H | 5.38987000  | 1.69422800  | -1.74000300 |
| H | 6.44670400  | 0.91532400  | -2.92421700 |
| H | 6.16972200  | -0.71531900 | -4.64548500 |
| H | 5.27714400  | -2.22071200 | -4.83296400 |
| C | 3.91684900  | -1.35899400 | 0.30410500  |
| H | 7.25861100  | -0.31515200 | 1.97498300  |
| H | 3.44624900  | -0.48837700 | -6.24025500 |
| C | 6.93730600  | 0.48510400  | -0.80266500 |
| H | 7.35121200  | 1.39640100  | -0.35556800 |
| H | 7.79361700  | -0.11007200 | -1.14960100 |
| C | 5.35570400  | -1.31724100 | -4.21757300 |
| C | 5.61078300  | -1.63310900 | -2.72769800 |
| H | 5.08717900  | -2.55468100 | -2.44915000 |
| H | 6.67006500  | -1.76370900 | -2.48523200 |
| C | 0.41569800  | 1.62900100  | -3.40294700 |
| C | -0.84285300 | 1.07898900  | -3.75169400 |
| C | 0.49788400  | 2.96064500  | -2.92133400 |
| C | -0.99781000 | -0.26745800 | -4.21327000 |
| C | -2.03834200 | 1.88289600  | -3.62145900 |
| C | -0.70877500 | 3.74459500  | -2.77420500 |
| C | -2.22697100 | -0.77069300 | -4.54830900 |
| H | -0.12618600 | -0.90669600 | -4.25746400 |
| C | -3.30255100 | 1.32120700  | -3.98866400 |

|   |             |             |             |
|---|-------------|-------------|-------------|
| C | -1.94014300 | 3.18754100  | -3.13145400 |
| C | -3.39746300 | 0.03397400  | -4.44729000 |
| H | -2.31471100 | -1.80441200 | -4.86845600 |
| H | -4.19168400 | 1.93964900  | -3.88859800 |
| H | -2.84287100 | 3.78736800  | -3.03199400 |
| H | -4.36501900 | -0.38479100 | -4.70677500 |
| C | 3.15750000  | -2.50133400 | 2.44660400  |
| C | 2.59648200  | -1.93373400 | 3.61762100  |
| C | 2.81724100  | -3.82327300 | 2.06517700  |
| C | 2.89527000  | -0.60499500 | 4.06344100  |
| C | 1.67408400  | -2.70990300 | 4.41595500  |
| C | 1.87153500  | -4.57459800 | 2.85760900  |
| C | 2.36661600  | -0.10275100 | 5.22549200  |
| H | 3.55260300  | 0.01311700  | 3.46325800  |
| C | 1.13380400  | -2.14346000 | 5.61317500  |
| C | 1.32890500  | -4.00053900 | 4.00896700  |
| C | 1.47471800  | -0.88086100 | 6.01811800  |
| H | 2.62964300  | 0.90246300  | 5.54548000  |
| H | 0.44787700  | -2.74864200 | 6.20173900  |
| H | 0.62448000  | -4.57539600 | 4.60677900  |
| H | 1.06923200  | -0.46909200 | 6.93880400  |
| C | 1.78446700  | 4.88129700  | -2.11762600 |
| H | 2.74132700  | 5.32962200  | -1.86533600 |
| C | 1.73867900  | 3.59413300  | -2.58719600 |
| H | 2.66054500  | 3.03917100  | -2.71623200 |
| C | 0.59028200  | 5.63920500  | -1.95496100 |
| H | 0.64535400  | 6.65870300  | -1.58283600 |
| C | -0.61817700 | 5.08409600  | -2.27981600 |
| H | -1.53796100 | 5.65423900  | -2.17161000 |
| C | 3.03340500  | -5.75483800 | 0.58340700  |
| H | 3.48385300  | -6.22376600 | -0.28735100 |
| C | 2.07957200  | -6.47881700 | 1.35298600  |
| H | 1.80349300  | -7.48774800 | 1.05892500  |
| C | 1.52143200  | -5.90252400 | 2.46063700  |
| H | 0.79740500  | -6.44454800 | 3.06421000  |
| C | 3.39068000  | -4.47827600 | 0.92884400  |
| H | 4.12763500  | -3.95080200 | 0.33460800  |
| N | 0.34020900  | -1.19077000 | -1.24640900 |
| S | -0.59625600 | -2.37790500 | -0.75749400 |
| O | -2.01461100 | -1.99366600 | -0.96391500 |
| O | -0.24912300 | -3.00045800 | 0.52765900  |
| C | -0.28464800 | -3.70530300 | -2.03365000 |
| F | -0.55003200 | -3.26895400 | -3.27349700 |
| F | -1.07036500 | -4.75574300 | -1.77501700 |



|   |             |             |             |
|---|-------------|-------------|-------------|
| F | 0.99325200  | -4.09150300 | -1.98056000 |
| C | 0.26025000  | 3.51625600  | 2.39910900  |
| C | 0.39132400  | 2.34490500  | 3.44855000  |
| H | 0.71015700  | 2.80391000  | 4.39437500  |
| H | 1.19275000  | 1.68311200  | 3.11967000  |
| C | -0.81469100 | 1.49930900  | 3.70874600  |
| C | -0.42139100 | 2.98690000  | 1.08254800  |
| H | -1.15617000 | 3.71594700  | 0.74237500  |
| H | 0.32033900  | 2.87523900  | 0.29204300  |
| N | -1.09014200 | 1.67022200  | 1.17406600  |
| C | -2.41659200 | 1.45849700  | 1.02759000  |
| N | -2.82848300 | 0.30386300  | 0.47666400  |
| C | -4.18073400 | -0.15651800 | 0.40533300  |
| C | -4.92088700 | -0.42776100 | 1.55789600  |
| C | -4.72552600 | -0.39601800 | -0.85403000 |
| C | -6.22312900 | -0.90703400 | 1.44061900  |
| C | -6.03130400 | -0.88231700 | -0.95776000 |
| H | -4.13232500 | -0.20999100 | -1.74281500 |
| C | -6.78780500 | -1.13518600 | 0.18288800  |
| H | -7.79828200 | -1.51559100 | 0.09751800  |
| C | -6.60086300 | -1.11616900 | -2.33355900 |
| C | -7.04890100 | -1.13626200 | 2.67935800  |
| F | -5.88717600 | -2.03393800 | -3.01995300 |
| F | -7.87957600 | -1.54259600 | -2.29136000 |
| F | -6.57844000 | 0.02124900  | -3.07167800 |
| F | -7.78083000 | -0.04334900 | 2.99617500  |
| F | -7.91630500 | -2.15782800 | 2.51994000  |
| F | -6.27679100 | -1.41703300 | 3.75253500  |
| S | -3.53663000 | 2.59992600  | 1.69963900  |
| H | -4.48213500 | -0.27598300 | 2.53585900  |
| H | -2.18107900 | -0.28823900 | -0.06363500 |
| H | -0.43087100 | 0.89215000  | 0.97710800  |
| C | -2.02083800 | 1.92228600  | 4.25611400  |
| H | -2.04613200 | 2.86643500  | 4.79979700  |
| H | -2.71142100 | 2.30920900  | 3.16047700  |
| H | -2.69307500 | 1.15666100  | 4.64372900  |
| C | -0.61365000 | 4.67280800  | 2.97703400  |
| H | -0.17703100 | 4.99627300  | 3.93222600  |
| H | -1.60677200 | 4.28531100  | 3.21052400  |
| C | 1.71713800  | 3.97375100  | 2.13806300  |
| C | 2.26003600  | 5.13099500  | 2.71773100  |
| C | 2.58114600  | 3.15897700  | 1.38573500  |
| C | 3.60022600  | 5.47854000  | 2.52929100  |
| H | 1.64871000  | 5.78542500  | 3.32868100  |

|   |             |            |            |
|---|-------------|------------|------------|
| C | 3.91997500  | 3.50137400 | 1.20141600 |
| H | 2.22339300  | 2.22796500 | 0.95872000 |
| C | 4.43751300  | 4.66790000 | 1.76592700 |
| H | 3.98469200  | 6.38615000 | 2.98744300 |
| H | 4.55818000  | 2.84026600 | 0.62128600 |
| H | 5.48057500  | 4.93634100 | 1.62083500 |
| C | -0.79144300 | 5.86428600 | 2.06649800 |
| C | -1.97429100 | 6.39084100 | 1.74341400 |
| H | -2.05094600 | 7.26350400 | 1.10009200 |
| H | -2.91034400 | 5.97348900 | 2.10788800 |
| H | 0.11250700  | 6.31446200 | 1.66125500 |
| H | -0.70749900 | 0.44247700 | 3.47312000 |

TS-EF-3RS-6

1 imaginary frequency

H = -5236.762942

G = -5236.961433

E(M06-2X-DCM) = -5237.606744

E(M06-2X-cyclohexane) = -5237.576058

|   |            |             |             |
|---|------------|-------------|-------------|
| O | 2.55649500 | -1.64094400 | -0.74059400 |
| O | 2.27568600 | 0.92137200  | -1.04404600 |
| P | 1.50727100 | -0.41396800 | -0.47995800 |
| O | 1.20174500 | -0.15351300 | 0.96529000  |
| C | 6.28701300 | -1.55785200 | 1.15114700  |
| C | 6.07257700 | -0.85196700 | -0.02831700 |
| C | 4.84557200 | -0.94521200 | -0.70159400 |
| C | 3.99167200 | -2.40707800 | 1.05951800  |
| C | 5.26089400 | -2.35330200 | 1.66177500  |
| C | 2.64146000 | 1.00663600  | -2.38691900 |
| C | 3.79002300 | 0.35208300  | -2.83272500 |
| C | 4.05016500 | 0.29718200  | -4.21216300 |
| C | 3.24879900 | 0.98389500  | -5.11718900 |
| C | 2.18406400 | 1.74490400  | -4.63520100 |
| C | 1.85053800 | 1.76812200  | -3.27166800 |
| H | 5.42886900 | -2.93731100 | 2.56190100  |
| H | 1.57697100 | 2.32481000  | -5.32430000 |
| C | 4.95291800 | -0.28216800 | -2.07039700 |
| C | 6.07289500 | 0.77292300  | -1.77390700 |
| H | 5.61308100 | 1.64912700  | -1.30222000 |
| H | 6.58068400 | 1.11058900  | -2.68270300 |
| H | 6.12760300 | 0.02125900  | -4.77310300 |
| H | 5.07285600 | -1.27685300 | -5.32197200 |
| C | 3.80022900 | -1.65522000 | -0.11647300 |
| H | 7.24248600 | -1.50287200 | 1.66699400  |

|   |             |             |             |
|---|-------------|-------------|-------------|
| H | 3.45330800  | 0.94339700  | -6.18408600 |
| C | 7.01396800  | 0.07386200  | -0.76796900 |
| H | 7.51813900  | 0.78132200  | -0.09950200 |
| H | 7.80459400  | -0.48919900 | -1.28359600 |
| C | 5.25042600  | -0.57987300 | -4.49499100 |
| C | 5.46432600  | -1.29873400 | -3.14611600 |
| H | 4.83937100  | -2.19803800 | -3.10280900 |
| H | 6.50134500  | -1.60326500 | -2.97381300 |
| C | 0.72868900  | 2.64961300  | -2.81484200 |
| C | -0.60748100 | 2.36597100  | -3.18691300 |
| C | 1.02928600  | 3.84100600  | -2.10685800 |
| C | -0.97227700 | 1.18668800  | -3.91148900 |
| C | -1.66353100 | 3.28625300  | -2.82581400 |
| C | -0.03900200 | 4.74176800  | -1.73376800 |
| C | -2.27077900 | 0.94702400  | -4.27614800 |
| H | -0.20546300 | 0.45985400  | -4.14227500 |
| C | -3.00613000 | 3.00082800  | -3.22951200 |
| C | -1.35406800 | 4.43800300  | -2.09781400 |
| C | -3.30415600 | 1.87010100  | -3.94321900 |
| H | -2.51980500 | 0.03030400  | -4.80183300 |
| H | -3.78671100 | 3.70835900  | -2.95899400 |
| H | -2.15237400 | 5.12677500  | -1.82778000 |
| H | -4.32856000 | 1.66245800  | -4.23909700 |
| C | 2.91717300  | -3.26085900 | 1.65254100  |
| C | 2.44924600  | -2.99966500 | 2.96505600  |
| C | 2.41112600  | -4.36829600 | 0.92675100  |
| C | 2.91788800  | -1.90222600 | 3.75877800  |
| C | 1.45195600  | -3.86566300 | 3.55391600  |
| C | 1.39153600  | -5.20452000 | 1.51697000  |
| C | 2.47951700  | -1.70775200 | 5.04402600  |
| H | 3.63281400  | -1.21203000 | 3.32682100  |
| C | 1.00937800  | -3.61794200 | 4.89152300  |
| C | 0.94236600  | -4.93312300 | 2.81089800  |
| C | 1.51369800  | -2.57792600 | 5.62569300  |
| H | 2.87012600  | -0.87556000 | 5.62471000  |
| H | 0.26550200  | -4.28786500 | 5.31713800  |
| H | 0.18342100  | -5.57468300 | 3.25436000  |
| H | 1.18103200  | -2.41254400 | 6.64728800  |
| C | 2.63018000  | 5.40919600  | -1.12565100 |
| H | 3.65864700  | 5.68837600  | -0.91155800 |
| C | 2.36740400  | 4.23209800  | -1.77766900 |
| H | 3.18736300  | 3.58700300  | -2.07151800 |
| C | 1.57111300  | 6.27815100  | -0.73497300 |
| H | 1.79688900  | 7.20573900  | -0.21565700 |

|   |             |             |             |
|---|-------------|-------------|-------------|
| C | 0.27554200  | 5.94711400  | -1.03013800 |
| H | -0.54256000 | 6.60745300  | -0.75162700 |
| C | 2.36733100  | -5.79989500 | -1.05350900 |
| H | 2.74458600  | -6.04475700 | -2.04277000 |
| C | 1.34119500  | -6.60101500 | -0.47789800 |
| H | 0.93811700  | -7.44262300 | -1.03455200 |
| C | 0.87405900  | -6.31094800 | 0.77423100  |
| H | 0.09734400  | -6.91853700 | 1.23239800  |
| C | 2.88431000  | -4.72793900 | -0.37541000 |
| H | 3.67341700  | -4.13979200 | -0.82869200 |
| N | 0.28345500  | -0.67449000 | -1.49913400 |
| S | -0.68799200 | -1.92698500 | -1.44380200 |
| O | -2.08736200 | -1.45488800 | -1.59423400 |
| O | -0.42563700 | -2.91921700 | -0.39176700 |
| C | -0.33836100 | -2.81633000 | -3.04860000 |
| F | -0.58202200 | -2.02569800 | -4.10588100 |
| F | -1.12127700 | -3.89607500 | -3.13779700 |
| F | 0.94130000  | -3.19958100 | -3.08773600 |
| C | 0.26968600  | 2.45214400  | 3.44227900  |
| C | 0.36445300  | 0.97364900  | 3.95675500  |
| H | 0.66908000  | 0.99519500  | 5.00937300  |
| H | 1.15059500  | 0.47082900  | 3.39120800  |
| C | -0.87375700 | 0.13526500  | 3.88428900  |
| C | -0.34950900 | 2.44317600  | 2.00029500  |
| H | -0.99269500 | 3.31315100  | 1.86164100  |
| H | 0.45505300  | 2.48050000  | 1.26632200  |
| N | -1.10453800 | 1.22918300  | 1.61544200  |
| C | -2.43392400 | 1.14566900  | 1.40467200  |
| N | -2.88699700 | 0.27928600  | 0.48342300  |
| C | -4.24663700 | -0.10313300 | 0.26529700  |
| C | -5.02265900 | -0.67708400 | 1.27510400  |
| C | -4.76241900 | 0.04193600  | -1.02062700 |
| C | -6.32999500 | -1.06779700 | 0.99768900  |
| C | -6.07270400 | -0.36197600 | -1.28763700 |
| H | -4.14186400 | 0.46204600  | -1.80420600 |
| C | -6.86564100 | -0.90944000 | -0.28344600 |
| H | -7.88462400 | -1.21193400 | -0.49228300 |
| C | -6.61641400 | -0.15372900 | -2.67782200 |
| C | -7.15755100 | -1.73235000 | 2.06705700  |
| F | -5.79700200 | -0.67698200 | -3.61479300 |
| F | -7.83345600 | -0.71073200 | -2.83933700 |
| F | -6.73604600 | 1.16627500  | -2.96492500 |
| F | -7.09762700 | -3.07953600 | 1.97761900  |
| F | -6.73747700 | -1.39898200 | 3.30784200  |

|   |             |             |             |
|---|-------------|-------------|-------------|
| F | -8.46029100 | -1.38925200 | 1.97078100  |
| S | -3.50832300 | 2.02420100  | 2.44735900  |
| H | -4.61316900 | -0.81666800 | 2.26698800  |
| H | -2.25159700 | -0.11936500 | -0.22416500 |
| H | -0.47277600 | 0.54382200  | 1.16063300  |
| C | -2.06316800 | 0.36720300  | 4.55891300  |
| H | -2.06513900 | 1.05405300  | 5.40453200  |
| H | -2.74232400 | 1.18549200  | 3.67202500  |
| H | -2.77399000 | -0.45533700 | 4.63470400  |
| C | -0.59808900 | 3.33278900  | 4.41255200  |
| H | -0.19556600 | 3.19006800  | 5.42569600  |
| H | -1.62869600 | 2.97369100  | 4.41598100  |
| C | 1.69425400  | 3.05358700  | 3.43340500  |
| C | 2.12130400  | 3.94703600  | 2.43844100  |
| C | 2.58609300  | 2.79166500  | 4.48762200  |
| C | 3.39004100  | 4.52839800  | 2.48247400  |
| H | 1.46943400  | 4.22039100  | 1.61614200  |
| C | 3.85432500  | 3.36977500  | 4.53372400  |
| H | 2.30187100  | 2.12526000  | 5.29560600  |
| C | 4.26680800  | 4.24086500  | 3.52609900  |
| H | 3.68478600  | 5.20763200  | 1.68813200  |
| H | 4.51892100  | 3.13476000  | 5.36101800  |
| H | 5.25533300  | 4.69089400  | 3.55703800  |
| C | -0.61151700 | 4.80710200  | 4.10104600  |
| C | -1.69714300 | 5.49283200  | 3.73645300  |
| H | -1.65484200 | 6.56123300  | 3.54096600  |
| H | -2.66796300 | 5.01552100  | 3.62292100  |
| H | 0.33809500  | 5.32994700  | 4.19841500  |
| H | -0.79832100 | -0.76627600 | 3.27973000  |

TS-EF-3RS-7

l imaginary frequency

H = -5236.766094

G = -5236.962231

E(M06-2X-DCM) = -5237.609670

E(M06-2X-cyclohexane) = -5237.578949

|   |            |             |             |
|---|------------|-------------|-------------|
| O | 2.70205200 | -1.08720200 | 1.28358900  |
| O | 2.12749500 | -0.91507300 | -1.23839900 |
| P | 1.51945100 | -0.61744800 | 0.25568200  |
| O | 1.20642200 | 0.84889900  | 0.29923200  |
| C | 6.36701400 | 0.92682000  | 1.16851100  |
| C | 6.08770000 | -0.09067600 | 0.26186200  |
| C | 4.89381600 | -0.82154300 | 0.35577800  |
| C | 4.19226700 | 0.57163600  | 2.23676000  |

|   |             |             |             |
|---|-------------|-------------|-------------|
| C | 5.43682900  | 1.22137400  | 2.16597800  |
| C | 2.49936400  | -2.20395100 | -1.61508400 |
| C | 3.73589400  | -2.70786200 | -1.21029000 |
| C | 4.03635000  | -4.05690600 | -1.46086700 |
| C | 3.17342600  | -4.85352700 | -2.20496300 |
| C | 1.99952800  | -4.29305700 | -2.70701100 |
| C | 1.62842800  | -2.96998100 | -2.41719300 |
| H | 5.66014400  | 1.98850400  | 2.90164600  |
| H | 1.33427800  | -4.89157300 | -3.32246400 |
| C | 4.94977600  | -2.02408700 | -0.58129000 |
| C | 5.91916900  | -1.46743200 | -1.67877400 |
| H | 5.34180000  | -0.84995300 | -2.37655300 |
| H | 6.39983600  | -2.26366400 | -2.25563900 |
| H | 6.14700300  | -4.54809500 | -1.56301300 |
| H | 5.28863700  | -5.39768500 | -0.28227100 |
| C | 3.93135100  | -0.43472400 | 1.28520100  |
| H | 7.30047100  | 1.48154700  | 1.11236800  |
| H | 3.41041300  | -5.89565800 | -2.40388500 |
| C | 6.91964900  | -0.58146900 | -0.90347900 |
| H | 7.31458400  | 0.24055800  | -1.51167500 |
| H | 7.78694900  | -1.16244400 | -0.55970800 |
| C | 5.34912100  | -4.44152500 | -0.81454300 |
| C | 5.61704200  | -3.25042300 | 0.12907600  |
| H | 5.11257800  | -3.41694000 | 1.08772700  |
| H | 6.67947100  | -3.08703300 | 0.33459900  |
| C | 0.36580400  | -2.42658700 | -3.01263200 |
| C | -0.89013000 | -2.96009500 | -2.63258500 |
| C | 0.43962100  | -1.45661100 | -4.04423200 |
| C | -1.03198500 | -3.94129000 | -1.59974400 |
| C | -2.09356300 | -2.50380500 | -3.29298000 |
| C | -0.77383500 | -0.99256100 | -4.67999200 |
| C | -2.25721600 | -4.45563100 | -1.26777500 |
| H | -0.15249200 | -4.25055500 | -1.05092500 |
| C | -3.35404500 | -3.06786200 | -2.91693200 |
| C | -2.00483100 | -1.52490800 | -4.28590300 |
| C | -3.43611100 | -4.02457300 | -1.94001400 |
| H | -2.33535200 | -5.18029500 | -0.46322700 |
| H | -4.25014800 | -2.71731100 | -3.42395100 |
| H | -2.91326600 | -1.18417800 | -4.77914700 |
| H | -4.40020400 | -4.43570500 | -1.65668000 |
| C | 3.21190600  | 0.93816300  | 3.30448000  |
| C | 2.69725600  | 2.25754900  | 3.37212500  |
| C | 2.83838200  | -0.01862200 | 4.28178700  |
| C | 3.03928300  | 3.28136300  | 2.42919900  |

|   |              |              |              |
|---|--------------|--------------|--------------|
| C | 1. 78281800  | 2. 61453400  | 4. 43387000  |
| C | 1. 89981400  | 0. 34568300  | 5. 31770800  |
| C | 2. 55950400  | 4. 56068800  | 2. 55325700  |
| H | 3. 69245500  | 3. 03113700  | 1. 60150700  |
| C | 1. 29070400  | 3. 95517300  | 4. 51599400  |
| C | 1. 39916900  | 1. 64811600  | 5. 36606900  |
| C | 1. 67286800  | 4. 90929400  | 3. 61185800  |
| H | 2. 85824800  | 5. 32124400  | 1. 83536000  |
| H | 0. 60843300  | 4. 20113000  | 5. 32662400  |
| H | 0. 69984000  | 1. 91871400  | 6. 15456900  |
| H | 1. 30426000  | 5. 92831300  | 3. 69605800  |
| C | 1. 72255500  | -0. 02003300 | -5. 55252100 |
| H | 2. 68185000  | 0. 34594600  | -5. 90789900 |
| C | 1. 68087100  | -0. 93365400 | -4. 53154400 |
| H | 2. 60574100  | -1. 28545800 | -4. 08931000 |
| C | 0. 52256200  | 0. 45140100  | -6. 15802300 |
| H | 0. 57376500  | 1. 17245500  | -6. 96993700 |
| C | -0. 68839700 | -0. 02197200 | -5. 72773400 |
| H | -1. 61267500 | 0. 31509900  | -6. 19172300 |
| C | 2. 98415500  | -2. 24949600 | 5. 26989900  |
| H | 3. 40577700  | -3. 25109100 | 5. 26715900  |
| C | 2. 03490600  | -1. 89269600 | 6. 26872200  |
| H | 1. 73289600  | -2. 62548800 | 7. 01199900  |
| C | 1. 51464200  | -0. 62805100 | 6. 29085100  |
| H | 0. 79565100  | -0. 33589100 | 7. 05242500  |
| C | 3. 37280300  | -1. 34613600 | 4. 31620600  |
| H | 4. 10578900  | -1. 63681600 | 3. 57291700  |
| N | 0. 33071900  | -1. 68720900 | 0. 46123500  |
| S | -0. 62454700 | -1. 72035300 | 1. 72721000  |
| O | -2. 03897400 | -1. 74743700 | 1. 27189800  |
| O | -0. 29769500 | -0. 79976100 | 2. 82583800  |
| C | -0. 33788800 | -3. 42775200 | 2. 42762700  |
| F | -0. 59362200 | -4. 38164100 | 1. 52029600  |
| F | -1. 14339500 | -3. 61331700 | 3. 47855500  |
| F | 0. 93236900  | -3. 54506600 | 2. 82391900  |
| C | 0. 31913500  | 3. 71706600  | -1. 85118500 |
| C | 0. 40949000  | 3. 99621800  | -0. 31929300 |
| H | 0. 75806100  | 5. 02935200  | -0. 18781100 |
| H | 1. 15533600  | 3. 32499900  | 0. 10856700  |
| C | -0. 84655400 | 3. 84866100  | 0. 47828300  |
| C | -0. 33646800 | 2. 30029400  | -2. 08278200 |
| H | -1. 00066400 | 2. 32821100  | -2. 94755700 |
| H | 0. 45508300  | 1. 57432400  | -2. 27453000 |
| N | -1. 08758400 | 1. 73390500  | -0. 94446100 |

|   |             |             |             |
|---|-------------|-------------|-------------|
| C | -2.42012300 | 1.54340900  | -0.88120000 |
| N | -2.89136500 | 0.53111100  | -0.13424600 |
| C | -4.25835800 | 0.29308300  | 0.20706900  |
| C | -5.01713800 | 1.23564600  | 0.90525200  |
| C | -4.80199900 | -0.94950700 | -0.11189400 |
| C | -6.33438800 | 0.94050800  | 1.24674700  |
| C | -6.12347900 | -1.23463400 | 0.24141700  |
| H | -4.19553500 | -1.68718500 | -0.62630500 |
| C | -6.89782400 | -0.29445800 | 0.91485000  |
| H | -7.92061300 | -0.52136900 | 1.18954900  |
| C | -6.69090200 | -2.57955700 | -0.13422400 |
| C | -7.17689300 | 1.97926700  | 1.93992100  |
| F | -6.00430000 | -3.58952200 | 0.44181400  |
| F | -7.98367200 | -2.70769600 | 0.22715800  |
| F | -6.62401300 | -2.78175100 | -1.47362200 |
| F | -7.88241300 | 2.71757200  | 1.05278400  |
| F | -8.06946300 | 1.41745700  | 2.78207200  |
| F | -6.42210800 | 2.84099500  | 2.65724800  |
| S | -3.47400200 | 2.70786500  | -1.62472700 |
| H | -4.58246900 | 2.18543800  | 1.18838300  |
| H | -2.26944400 | -0.23148900 | 0.18036800  |
| H | -0.45661900 | 1.18081300  | -0.33389300 |
| C | -2.01854400 | 4.56886900  | 0.30671000  |
| H | -1.98027400 | 5.49581500  | -0.26411000 |
| H | -2.69210500 | 3.80672800  | -0.62638700 |
| H | -2.74588400 | 4.55336900  | 1.11837300  |
| C | -0.51768400 | 4.80209400  | -2.61126600 |
| H | -1.57664400 | 4.71750100  | -2.35693200 |
| H | -0.45168700 | 4.55446000  | -3.67989600 |
| C | 1.73439200  | 3.71910900  | -2.47031000 |
| C | 1.89923300  | 3.29053300  | -3.79877300 |
| C | 2.87344700  | 4.17302000  | -1.79058200 |
| C | 3.14618800  | 3.31613100  | -4.42049400 |
| H | 1.04758300  | 2.91877500  | -4.36205100 |
| C | 4.12469300  | 4.20180600  | -2.41193000 |
| H | 2.80567500  | 4.50532100  | -0.76112600 |
| C | 4.26823200  | 3.77630900  | -3.73040600 |
| H | 3.23781700  | 2.97526900  | -5.44813700 |
| H | 4.98733700  | 4.55807000  | -1.85517200 |
| H | 5.24084200  | 3.80009100  | -4.21422500 |
| C | -0.04989000 | 6.21971200  | -2.42108900 |
| C | -0.84670000 | 7.25691300  | -2.15275800 |
| H | -0.45711200 | 8.26663800  | -2.05523600 |
| H | -1.92441200 | 7.14427200  | -2.04498700 |



|   |             |            |             |
|---|-------------|------------|-------------|
| H | 1.01925500  | 6.39261900 | -2.54370300 |
| H | -0.80374800 | 3.13062500 | 1.29529000  |

TS-EF-3RS-8

l imaginary frequency

H = -5236.763387

G = -5236.959973

E(M06-2X-DCM) = -5237.608586

E(M06-2X-cyclohexane) = -5237.576641

|   |             |             |             |
|---|-------------|-------------|-------------|
| O | 2.65623900  | -1.35273100 | 1.09371700  |
| O | 2.08185800  | -0.73964300 | -1.35897100 |
| P | 1.48153900  | -0.69317300 | 0.16645900  |
| O | 1.19632500  | 0.74965200  | 0.46284800  |
| C | 6.35508400  | 0.58882800  | 1.31318900  |
| C | 6.05717500  | -0.25159900 | 0.24537900  |
| C | 4.85114400  | -0.96788100 | 0.21672400  |
| C | 4.17596300  | 0.09059600  | 2.31327400  |
| C | 5.43154100  | 0.72172500  | 2.35067000  |
| C | 2.43112100  | -1.95047700 | -1.95343200 |
| C | 3.65940800  | -2.53681000 | -1.64625600 |
| C | 3.93676500  | -3.82728900 | -2.12657800 |
| C | 3.05944400  | -4.46969700 | -2.99291900 |
| C | 1.89476600  | -3.81179900 | -3.38655900 |
| C | 1.54662600  | -2.55216300 | -2.87234900 |
| H | 5.66929600  | 1.34592600  | 3.20705400  |
| H | 1.21907700  | -4.28428400 | -4.09350700 |
| C | 4.88550100  | -1.99126400 | -0.91418500 |
| C | 5.86200300  | -1.26881400 | -1.90335000 |
| H | 5.29389200  | -0.53027900 | -2.48069800 |
| H | 6.32792000  | -1.96088400 | -2.61171700 |
| H | 6.03867100  | -4.32730100 | -2.32169200 |
| H | 5.16879800  | -5.37100700 | -1.20230500 |
| C | 3.89673000  | -0.73133900 | 1.20296500  |
| H | 7.29776900  | 1.12937700  | 1.34979300  |
| H | 3.27849000  | -5.46580900 | -3.36915300 |
| C | 6.87878000  | -0.54708600 | -0.99100400 |
| H | 7.28667500  | 0.36114000  | -1.44958500 |
| H | 7.73647200  | -1.19316600 | -0.75674700 |
| C | 5.24412000  | -4.33854900 | -1.56226300 |
| C | 5.53364700  | -3.33222300 | -0.42895600 |
| H | 5.02835200  | -3.65334300 | 0.48909000  |
| H | 6.59902700  | -3.22367900 | -0.20342500 |
| C | 0.29432800  | -1.89225900 | -3.36268700 |
| C | -0.97150000 | -2.45992700 | -3.07671000 |

|   |             |             |             |
|---|-------------|-------------|-------------|
| C | 0.38680000  | -0.76148300 | -4.21324800 |
| C | -1.13230400 | -3.60102900 | -2.22721800 |
| C | -2.16582300 | -1.87522000 | -3.64622400 |
| C | -0.81748000 | -0.17273200 | -4.75646100 |
| C | -2.36711300 | -4.14217500 | -1.98555700 |
| H | -0.25896400 | -4.01626000 | -1.74217000 |
| C | -3.43678600 | -2.47226300 | -3.36958400 |
| C | -2.05836100 | -0.74214200 | -4.45648100 |
| C | -3.53727000 | -3.58064200 | -2.57098800 |
| H | -2.45932700 | -4.99284800 | -1.31745100 |
| H | -4.32595900 | -2.02349000 | -3.80647800 |
| H | -2.96001900 | -0.30508700 | -4.88149400 |
| H | -4.50907800 | -4.01618500 | -2.35974200 |
| C | 3.20330700  | 0.28271800  | 3.43248900  |
| C | 2.71454400  | 1.57938600  | 3.73300300  |
| C | 2.81162600  | -0.82343900 | 4.22828100  |
| C | 3.07527500  | 2.74622600  | 2.98294200  |
| C | 1.80872600  | 1.76189200  | 4.84532400  |
| C | 1.88083800  | -0.62883500 | 5.31577000  |
| C | 2.62179800  | 3.99301700  | 3.33262000  |
| H | 3.72189100  | 2.63312800  | 2.12073500  |
| C | 1.34419100  | 3.07655700  | 5.16473800  |
| C | 1.40648400  | 0.65428900  | 5.59468200  |
| C | 1.74453100  | 4.16732100  | 4.44091800  |
| H | 2.93563800  | 4.86182100  | 2.75832400  |
| H | 0.66857900  | 3.18931300  | 6.00969500  |
| H | 0.71341600  | 0.79560100  | 6.42154200  |
| H | 1.39762100  | 5.16276000  | 4.70593700  |
| C | 1.69699200  | 0.88821200  | -5.45680900 |
| H | 2.66312100  | 1.29160700  | -5.74714600 |
| C | 1.63785100  | -0.18618000 | -4.60766500 |
| H | 2.55587400  | -0.62596400 | -4.23548400 |
| C | 0.50627500  | 1.47933600  | -5.96820800 |
| H | 0.57134400  | 2.32839300  | -6.64391200 |
| C | -0.71349700 | 0.96173000  | -5.62203500 |
| H | -1.63115200 | 1.39093800  | -6.01809300 |
| C | 2.91352600  | -3.19564800 | 4.80867700  |
| H | 3.31553700  | -4.18909500 | 4.62863500  |
| C | 1.97142800  | -3.00176200 | 5.85790800  |
| H | 1.65496000  | -3.84786200 | 6.46173900  |
| C | 1.47650300  | -1.75079500 | 6.10400100  |
| H | 0.76361600  | -1.58303400 | 6.90770400  |
| C | 3.32003300  | -2.14642900 | 4.02734200  |
| H | 4.04759700  | -2.31613000 | 3.24245900  |

|   |             |             |             |
|---|-------------|-------------|-------------|
| N | 0.27453400  | -1.76110100 | 0.19162300  |
| S | -0.69348600 | -1.97560800 | 1.42997100  |
| O | -2.10416800 | -1.88217300 | 0.97162800  |
| O | -0.34970100 | -1.26326700 | 2.66925400  |
| C | -0.46204500 | -3.78414700 | 1.83389400  |
| F | -0.73402000 | -4.56380900 | 0.77735800  |
| F | -1.28401100 | -4.12007700 | 2.83357600  |
| F | 0.80000100  | -4.00333000 | 2.21279700  |
| C | 0.42064500  | 3.96959700  | -1.17202700 |
| C | 0.50598300  | 3.95713400  | 0.38458500  |
| H | 0.91526900  | 4.92053900  | 0.71468200  |
| H | 1.20997600  | 3.17812900  | 0.68111900  |
| C | -0.76779600 | 3.73140900  | 1.13525600  |
| C | -0.28158900 | 2.63774100  | -1.64748800 |
| H | -0.94420200 | 2.83834300  | -2.49027800 |
| H | 0.48573300  | 1.93075900  | -1.96658900 |
| N | -1.05285100 | 1.90789800  | -0.62001200 |
| C | -2.39045600 | 1.73664600  | -0.59730500 |
| N | -2.88776000 | 0.62360800  | -0.03274300 |
| C | -4.26277800 | 0.36350800  | 0.25767900  |
| C | -5.00307200 | 1.18984600  | 1.10654600  |
| C | -4.83451500 | -0.79059500 | -0.27361900 |
| C | -6.32958100 | 0.87382500  | 1.38817600  |
| C | -6.16513700 | -1.09883100 | 0.02131900  |
| H | -4.24292000 | -1.44311200 | -0.90661300 |
| C | -6.92079200 | -0.27015700 | 0.84557900  |
| H | -7.95081400 | -0.51495600 | 1.07391000  |
| C | -6.76304200 | -2.34396200 | -0.58219600 |
| C | -7.15085300 | 1.79835900  | 2.24845600  |
| F | -6.11060800 | -3.45598300 | -0.18085700 |
| F | -8.06310800 | -2.49520400 | -0.25771100 |
| F | -6.68513900 | -2.31762500 | -1.93585800 |
| F | -7.82593500 | 2.70143600  | 1.50117100  |
| F | -8.06754200 | 1.12333900  | 2.97331800  |
| F | -6.38027900 | 2.49824800  | 3.11068600  |
| S | -3.41341100 | 3.03133300  | -1.13865500 |
| H | -4.54711100 | 2.06487600  | 1.55118700  |
| H | -2.28513300 | -0.19484700 | 0.15272300  |
| H | -0.43905200 | 1.24136600  | -0.11292000 |
| C | -1.92052000 | 4.50380200  | 1.07473500  |
| H | -1.86439600 | 5.50844400  | 0.65740800  |
| H | -2.60938700 | 3.92744800  | 0.04264200  |
| H | -2.64807800 | 4.38477100  | 1.87758900  |
| C | -0.37876400 | 5.19877600  | -1.73351500 |

|   |             |            |             |
|---|-------------|------------|-------------|
| H | -1.44071700 | 5.07058500 | -1.50167900 |
| H | -0.30891200 | 5.16047900 | -2.82608000 |
| C | 1.83779000  | 4.03606500 | -1.77785800 |
| C | 2.00103600  | 3.82308800 | -3.15702500 |
| C | 2.98117300  | 4.34828700 | -1.03109100 |
| C | 3.25225800  | 3.91972800 | -3.76339600 |
| H | 1.14430600  | 3.56827100 | -3.77516000 |
| C | 4.23692800  | 4.44546400 | -1.63513400 |
| H | 2.91393000  | 4.51605600 | 0.03761000  |
| C | 4.37994900  | 4.23472600 | -3.00453700 |
| H | 3.34294200  | 3.74745800 | -4.83249100 |
| H | 5.10361100  | 4.68749400 | -1.02569700 |
| H | 5.35629600  | 4.31263900 | -3.47509800 |
| C | 0.08649500  | 6.55122100 | -1.26414600 |
| C | 0.68554900  | 7.46170400 | -2.03266800 |
| H | 0.98856900  | 8.42955700 | -1.64238400 |
| H | 0.89840500  | 7.27222300 | -3.08236600 |
| H | -0.09775000 | 6.79935900 | -0.21733200 |
| H | -0.75815900 | 2.89459700 | 1.83142000  |

TS-EF-3RR

l imaginary frequency

H = -5236.781144

G = -5236.974114

E(M06-2X-DCM) = -5237.617532

E(M06-2X-cyclohexane) = -5237.589221

|   |            |             |             |
|---|------------|-------------|-------------|
| O | 0.95827700 | -2.79867100 | 0.17653400  |
| O | 2.72536200 | -0.95103800 | -0.18361100 |
| P | 1.11635900 | -1.18938100 | -0.09957800 |
| O | 0.59146700 | -0.35591200 | 1.02763000  |
| C | 2.74641900 | -4.33313100 | 3.63945600  |
| C | 3.47347400 | -4.20508400 | 2.46067000  |
| C | 2.85905300 | -3.74789900 | 1.28481900  |
| C | 0.76213800 | -3.46285700 | 2.50379900  |
| C | 1.39657100 | -3.98319000 | 3.64435200  |
| C | 3.46246200 | -1.55675100 | -1.20367100 |
| C | 3.83178900 | -2.89484100 | -1.08545800 |
| C | 4.40255700 | -3.54237200 | -2.19276200 |
| C | 4.72005200 | -2.83042700 | -3.34471700 |
| C | 4.46690800 | -1.45838900 | -3.38676700 |
| C | 3.82059700 | -0.79357400 | -2.33219400 |
| H | 0.81411200 | -4.08716700 | 4.55524400  |
| H | 4.74957800 | -0.88261000 | -4.26314600 |
| C | 3.83229100 | -3.84072200 | 0.11362900  |

|   |              |              |              |
|---|--------------|--------------|--------------|
| C | 5. 19522200  | -3. 74631700 | 0. 88426400  |
| H | 5. 41775700  | -2. 69011700 | 1. 07481100  |
| H | 6. 02851500  | -4. 16428400 | 0. 31130000  |
| H | 5. 62972800  | -5. 27929900 | -1. 75224400 |
| H | 4. 22011200  | -5. 64597600 | -2. 74002300 |
| C | 1. 52770300  | -3. 33794800 | 1. 32890100  |
| H | 3. 22024600  | -4. 69381800 | 4. 54894700  |
| H | 5. 17105500  | -3. 32825300 | -4. 19957300 |
| C | 4. 94314300  | -4. 47131500 | 2. 22270100  |
| H | 5. 57613000  | -4. 09545300 | 3. 03453800  |
| H | 5. 14401800  | -5. 54881300 | 2. 13866500  |
| C | 4. 57356400  | -5. 02066900 | -1. 91208500 |
| C | 3. 74376400  | -5. 21791000 | -0. 62296400 |
| H | 2. 69652100  | -5. 41224200 | -0. 88144200 |
| H | 4. 09577300  | -6. 04808400 | -0. 00220400 |
| C | 3. 57210500  | 0. 67944600  | -2. 40776700 |
| C | 2. 71168900  | 1. 21128900  | -3. 39948600 |
| C | 4. 25107300  | 1. 54713400  | -1. 51446100 |
| C | 1. 97998400  | 0. 39087000  | -4. 31775300 |
| C | 2. 53092900  | 2. 64305700  | -3. 49246100 |
| C | 4. 03119800  | 2. 97290600  | -1. 59745800 |
| C | 1. 17184300  | 0. 94071300  | -5. 27739200 |
| H | 2. 04419500  | -0. 68603900 | -4. 22321700 |
| C | 1. 68130300  | 3. 17598300  | -4. 51243600 |
| C | 3. 17960800  | 3. 48136400  | -2. 58219700 |
| C | 1. 02727300  | 2. 35267000  | -5. 38809800 |
| H | 0. 61618500  | 0. 29163900  | -5. 94814400 |
| H | 1. 57014000  | 4. 25638100  | -4. 57451900 |
| H | 3. 01365100  | 4. 55484100  | -2. 63582000 |
| H | 0. 38621400  | 2. 76962700  | -6. 16066600 |
| C | -0. 68192900 | -3. 07862800 | 2. 58998500  |
| C | -1. 06836100 | -1. 98685100 | 3. 40505700  |
| C | -1. 66354000 | -3. 85459200 | 1. 92720100  |
| C | -0. 12021100 | -1. 13193500 | 4. 05616800  |
| C | -2. 47142100 | -1. 68990300 | 3. 58558200  |
| C | -3. 06280000 | -3. 53938700 | 2. 10478700  |
| C | -0. 52274400 | -0. 08300700 | 4. 84170100  |
| H | 0. 93612000  | -1. 31275700 | 3. 89958500  |
| C | -2. 85014000 | -0. 59416100 | 4. 42534400  |
| C | -3. 42820300 | -2. 47642200 | 2. 93667200  |
| C | -1. 90804600 | 0. 18722900  | 5. 03811000  |
| H | 0. 22145600  | 0. 55738000  | 5. 30795500  |
| H | -3. 91074400 | -0. 39595400 | 4. 56571200  |
| H | -4. 48493900 | -2. 26345800 | 3. 09138100  |

|   |             |             |             |
|---|-------------|-------------|-------------|
| H | -2.21031400 | 1.01775800  | 5.67043800  |
| C | 5.80365200  | 1.94438300  | 0.33370600  |
| H | 6.49699300  | 1.55865500  | 1.07621800  |
| C | 5.17658000  | 1.08096900  | -0.52551100 |
| H | 5.38673000  | 0.01950700  | -0.46313100 |
| C | 5.55776800  | 3.34475600  | 0.26649600  |
| H | 6.05923900  | 4.01289000  | 0.96156800  |
| C | 4.70014000  | 3.84100500  | -0.67735800 |
| H | 4.50211700  | 4.90706300  | -0.74439800 |
| C | -2.30889900 | -5.70613900 | 0.46859400  |
| H | -2.03014800 | -6.54562800 | -0.16251700 |
| C | -3.68525000 | -5.38415200 | 0.63822600  |
| H | -4.44370200 | -5.97793600 | 0.13531100  |
| C | -4.04721900 | -4.33434100 | 1.43834900  |
| H | -5.09587200 | -4.08534200 | 1.58447200  |
| C | -1.33599300 | -4.97210100 | 1.09460400  |
| H | -0.29355700 | -5.23700400 | 0.96121600  |
| N | 0.55788900  | -0.97230000 | -1.60529500 |
| S | -0.94206400 | -1.12369200 | -2.04106400 |
| O | -1.33872800 | -0.13747100 | -3.05983200 |
| O | -1.90789600 | -1.30681800 | -0.91449400 |
| C | -1.00318900 | -2.76026500 | -2.94215400 |
| F | -0.15385500 | -2.74526300 | -3.97532600 |
| F | -2.24456500 | -2.96601000 | -3.41404000 |
| F | -0.68127700 | -3.76427100 | -2.12573100 |
| C | -5.19322600 | 0.40566500  | -0.60092200 |
| C | -4.43848900 | 0.70167300  | -1.92889000 |
| H | -5.14456100 | 0.63716500  | -2.76937100 |
| H | -3.72353300 | -0.10265000 | -2.10148600 |
| C | -3.69909600 | 1.98615300  | -2.04937400 |
| C | -4.28560200 | 0.82381300  | 0.61872600  |
| H | -4.67233700 | 1.72601400  | 1.08865100  |
| H | -4.29418500 | 0.02134400  | 1.36537500  |
| N | -2.87985900 | 1.08458400  | 0.28786400  |
| C | -2.16538300 | 2.13457600  | 0.77208300  |
| N | -0.84053100 | 1.95649100  | 0.89001500  |
| C | 0.13413400  | 2.93141500  | 1.24416400  |
| C | 0.24452800  | 4.15830100  | 0.58531600  |
| C | 1.04202000  | 2.59066100  | 2.25040400  |
| C | 1.23873600  | 5.05644400  | 0.97037800  |
| C | 2.03460300  | 3.49732100  | 2.62057300  |
| H | 0.96220100  | 1.62448900  | 2.73438900  |
| C | 2.13414600  | 4.73744900  | 1.99245500  |
| H | 2.89287300  | 5.44778000  | 2.29843900  |

|   |              |             |             |
|---|--------------|-------------|-------------|
| C | 3.02857500   | 3.11512100  | 3.68678400  |
| C | 1.38732500   | 6.36640300  | 0.24273100  |
| F | 2.48519300   | 2.27722600  | 4.60040200  |
| F | 4.10640300   | 2.48885500  | 3.16960000  |
| F | 3.48377700   | 4.19983700  | 4.35347300  |
| F | 1.77148900   | 7.35790500  | 1.07451900  |
| F | 2.32846600   | 6.29812800  | -0.73584700 |
| F | 0.23857600   | 6.75073500  | -0.35168800 |
| S | -2.95753800  | 3.63599300  | 1.10744500  |
| H | -0.43925600  | 4.41448200  | -0.21229800 |
| H | -0.45341400  | 0.98701900  | 0.87783200  |
| H | -2.35156900  | 0.24918500  | -0.00969800 |
| C | -4.14519800  | 3.26445900  | -1.69852800 |
| H | -5.21250000  | 3.40539400  | -1.52608900 |
| H | -3.69964900  | 3.43493100  | -0.50990500 |
| H | -3.64475700  | 4.10081400  | -2.18979300 |
| C | -5.40066700  | -1.15161900 | -0.54267700 |
| H | -5.90495400  | -1.37678400 | 0.40762700  |
| H | -4.41460900  | -1.62759900 | -0.50778800 |
| C | -6.56784200  | 1.08773500  | -0.46626700 |
| C | -7.21353300  | 1.08134200  | 0.78380700  |
| C | -7.25732600  | 1.66834000  | -1.54076300 |
| C | -8.47712700  | 1.64312300  | 0.95665500  |
| H | -6.72583400  | 0.62696300  | 1.64220500  |
| C | -8.52491900  | 2.23342000  | -1.37296900 |
| H | -6.81525900  | 1.69079800  | -2.53150600 |
| C | -9.14114500  | 2.22625400  | -0.12370300 |
| H | -8.94262600  | 1.62340400  | 1.93838400  |
| H | -9.02716700  | 2.67845200  | -2.22780500 |
| H | -10.12566600 | 2.66618500  | 0.00746100  |
| C | -6.20391000  | -1.72650300 | -1.67689800 |
| C | -5.71660000  | -2.57393100 | -2.58601700 |
| H | -4.67964100  | -2.90063500 | -2.56668200 |
| H | -6.33930300  | -2.97160100 | -3.38359200 |
| H | -2.70602200  | 1.89159200  | -2.49031900 |
| H | -7.24898700  | -1.42143300 | -1.73548900 |

TS-EF-3RR-1

1 imaginary frequency

H = -5236.777706

G = -5236.972031

E(M06-2X-DCM) = -5237.611300

E(M06-2X-cyclohexane) = -5237.583570

|   |            |             |             |
|---|------------|-------------|-------------|
| O | 1.57904500 | -2.64383100 | -0.21451400 |
|---|------------|-------------|-------------|

|   |             |             |             |
|---|-------------|-------------|-------------|
| O | 2.59244600  | -0.29323200 | -0.59418300 |
| P | 1.16944100  | -1.06766400 | -0.38415200 |
| O | 0.52189400  | -0.49802300 | 0.83913500  |
| C | 4.38698200  | -3.73456600 | 2.69535100  |
| C | 4.79547400  | -3.31706100 | 1.43309700  |
| C | 3.85438400  | -2.99662300 | 0.44273300  |
| C | 2.05077100  | -3.46231500 | 2.02315400  |
| C | 3.02303600  | -3.82214200 | 2.97122500  |
| C | 3.31799300  | -0.51624200 | -1.76630200 |
| C | 4.05841100  | -1.68648900 | -1.90895000 |
| C | 4.57631900  | -2.01258600 | -3.17211100 |
| C | 4.47875300  | -1.11442000 | -4.23015800 |
| C | 3.87902900  | 0.12861500  | -4.01347100 |
| C | 3.27875200  | 0.45322000  | -2.78698900 |
| H | 2.68869100  | -4.15919000 | 3.94817600  |
| H | 3.85258100  | 0.86381700  | -4.81266100 |
| C | 4.55774000  | -2.69538100 | -0.87756100 |
| C | 5.96446500  | -2.25079200 | -0.34070700 |
| H | 5.91149200  | -1.19376700 | -0.05535500 |
| H | 6.75011300  | -2.35291700 | -1.09542500 |
| H | 6.28877100  | -3.34901000 | -3.20214300 |
| H | 4.86353600  | -4.01338800 | -3.99176700 |
| C | 2.49742300  | -3.02879000 | 0.76034300  |
| H | 5.11658100  | -3.98622900 | 3.46092500  |
| H | 4.88258300  | -1.36132400 | -5.20887200 |
| C | 6.20149500  | -3.11138000 | 0.91660800  |
| H | 6.85369100  | -2.62224400 | 1.64898600  |
| H | 6.67495500  | -4.07038200 | 0.66213000  |
| C | 5.19224400  | -3.39686400 | -3.14721300 |
| C | 4.71923700  | -3.95813200 | -1.78479400 |
| H | 3.74064300  | -4.43810700 | -1.89904700 |
| H | 5.40707800  | -4.69510900 | -1.35772400 |
| C | 2.70346300  | 1.81666900  | -2.55710700 |
| C | 1.54567900  | 2.24818900  | -3.24830000 |
| C | 3.37802900  | 2.70319100  | -1.67830100 |
| C | 0.81518200  | 1.39995600  | -4.14031500 |
| C | 1.05052500  | 3.59230200  | -3.04338700 |
| C | 2.86230500  | 4.03766600  | -1.47283300 |
| C | -0.29773500 | 1.84987100  | -4.80125200 |
| H | 1.13622800  | 0.37345500  | -4.26391800 |
| C | -0.11473000 | 4.02281800  | -3.75253000 |
| C | 1.71368100  | 4.44485900  | -2.15702700 |
| C | -0.76752600 | 3.18132100  | -4.61400200 |
| H | -0.84162800 | 1.17399300  | -5.45381500 |



|   |             |             |             |
|---|-------------|-------------|-------------|
| H | -0.46330700 | 5.04152700  | -3.59643900 |
| H | 1.32226700  | 5.44551200  | -1.98808300 |
| H | -1.64492700 | 3.52450600  | -5.15716500 |
| C | 0.60351600  | -3.58004000 | 2.38812000  |
| C | 0.04426800  | -2.70273600 | 3.34781500  |
| C | -0.17603900 | -4.62754700 | 1.84063100  |
| C | 0.77584600  | -1.61418200 | 3.92511400  |
| C | -1.32501000 | -2.88787700 | 3.77215200  |
| C | -1.54734500 | -4.79461200 | 2.26546600  |
| C | 0.21034300  | -0.79066300 | 4.86409900  |
| H | 1.79329600  | -1.43558100 | 3.59774300  |
| C | -1.87691200 | -2.00720000 | 4.75555300  |
| C | -2.08200100 | -3.92440500 | 3.21985500  |
| C | -1.13388800 | -0.99088700 | 5.29186900  |
| H | 0.78931200  | 0.03067300  | 5.27629300  |
| H | -2.90612800 | -2.16789700 | 5.06899400  |
| H | -3.11076900 | -4.06287400 | 3.54735000  |
| H | -1.56462800 | -0.33054000 | 6.03994600  |
| C | 5.20207600  | 3.22466200  | -0.13336200 |
| H | 6.10964100  | 2.92327500  | 0.38264400  |
| C | 4.57914000  | 2.34824100  | -0.98263700 |
| H | 5.00412900  | 1.36379400  | -1.13982700 |
| C | 4.67579600  | 4.52959000  | 0.08032200  |
| H | 5.18188600  | 5.21001300  | 0.75990900  |
| C | 3.54190600  | 4.92270200  | -0.57744500 |
| H | 3.12782500  | 5.91539900  | -0.42277900 |
| C | -0.43375300 | -6.57508700 | 0.38633100  |
| H | -0.01362700 | -7.27002100 | -0.33577400 |
| C | -1.78764500 | -6.72759200 | 0.79907400  |
| H | -2.38834600 | -7.53485500 | 0.38876100  |
| C | -2.32320400 | -5.86278800 | 1.71487300  |
| H | -3.35221700 | -5.97626100 | 2.04865500  |
| C | 0.34282300  | -5.56546400 | 0.89152400  |
| H | 1.37399900  | -5.46883100 | 0.57131300  |
| N | 0.42069100  | -1.00771400 | -1.82079800 |
| S | -1.04329900 | -1.48619000 | -2.12434100 |
| O | -1.64632000 | -0.72635400 | -3.23197700 |
| O | -1.90682600 | -1.66539100 | -0.91730800 |
| C | -0.89024100 | -3.22206300 | -2.80331500 |
| F | -0.12246400 | -3.21604600 | -3.89777700 |
| F | -2.10993000 | -3.67035100 | -3.13261400 |
| F | -0.35640400 | -4.04304800 | -1.89839000 |
| C | -5.29317700 | -0.18743900 | -0.71434100 |
| C | -4.52815500 | 0.33391500  | -1.96984200 |

|   |             |             |             |
|---|-------------|-------------|-------------|
| H | -5.19988300 | 0.31777200  | -2.83989900 |
| H | -3.72757800 | -0.36422300 | -2.21466100 |
| C | -3.93554400 | 1.69619300  | -1.90722500 |
| C | -4.44170900 | 0.13138600  | 0.56874500  |
| H | -4.91702500 | 0.90841100  | 1.16163000  |
| H | -4.37333700 | -0.77112300 | 1.18516800  |
| N | -3.06992000 | 0.59585800  | 0.31452300  |
| C | -2.49969900 | 1.65645100  | 0.94603900  |
| N | -1.16276400 | 1.63463700  | 1.06837000  |
| C | -0.30539800 | 2.66445500  | 1.54433900  |
| C | -0.41871500 | 3.99639500  | 1.14145400  |
| C | 0.74029500  | 2.27590000  | 2.39114100  |
| C | 0.48366000  | 4.94207500  | 1.63016200  |
| C | 1.64019700  | 3.23032500  | 2.85812900  |
| H | 0.84370300  | 1.23303600  | 2.66561000  |
| C | 1.51149200  | 4.57148700  | 2.49445500  |
| H | 2.21215300  | 5.31050800  | 2.86411600  |
| C | 2.80503600  | 2.81923400  | 3.72055700  |
| C | 0.31669100  | 6.38548500  | 1.23616300  |
| F | 2.60841800  | 1.61621400  | 4.30696500  |
| F | 3.94774600  | 2.73101100  | 3.00689000  |
| F | 3.02852700  | 3.71818900  | 4.70684600  |
| F | 1.48859400  | 7.06083100  | 1.28014800  |
| F | -0.17088700 | 6.50985900  | -0.02213300 |
| F | -0.54174500 | 7.03550200  | 2.05202300  |
| S | -3.48774000 | 2.98368500  | 1.45675500  |
| H | -1.19068500 | 4.29643600  | 0.44719200  |
| H | -0.65911900 | 0.73317600  | 0.91427800  |
| H | -2.44054000 | -0.14287200 | -0.04004500 |
| C | -4.54502100 | 2.85617500  | -1.41998600 |
| H | -5.62653300 | 2.84121400  | -1.28139400 |
| H | -4.16074400 | 2.91966800  | -0.19869200 |
| H | -4.13843700 | 3.80277700  | -1.77975600 |
| C | -5.38659800 | -1.74825800 | -0.91481900 |
| H | -4.36718600 | -2.13505000 | -1.01949700 |
| H | -5.90065300 | -1.91942400 | -1.87148700 |
| C | -6.72570200 | 0.37561600  | -0.57993000 |
| C | -7.34168200 | 0.50811500  | 0.67739700  |
| C | -7.50954100 | 0.67809500  | -1.70646200 |
| C | -8.65909700 | 0.95136400  | 0.80430600  |
| H | -6.80221200 | 0.24833500  | 1.58206300  |
| C | -8.82644300 | 1.12463800  | -1.58498300 |
| H | -7.10359300 | 0.56681500  | -2.70709000 |
| C | -9.40885900 | 1.27007000  | -0.32669700 |

|   |              |             |             |
|---|--------------|-------------|-------------|
| H | -9.09651700  | 1.04411700  | 1.79471400  |
| H | -9.39529400  | 1.35700300  | -2.48136100 |
| H | -10.43270600 | 1.61997900  | -0.22990000 |
| C | -6.10076400  | -2.50581200 | 0.17027300  |
| C | -5.51134800  | -3.40343900 | 0.96426400  |
| H | -4.45372300  | -3.64278200 | 0.87365700  |
| H | -6.07160500  | -3.94372900 | 1.72366100  |
| H | -2.93271100  | 1.78388400  | -2.32737500 |
| H | -7.16500700  | -2.30686700 | 0.28991900  |

TS-EF-3RR-2

1 imaginary frequency

H = -5236.776494

G = -5236.970888

E(M06-2X-DCM) = -5237.614010

E(M06-2X-cyclohexane) = -5237.585092

|   |            |             |             |
|---|------------|-------------|-------------|
| O | 1.15439700 | -2.77878700 | 0.06217500  |
| O | 2.79054800 | -0.79901200 | -0.19491700 |
| P | 1.20111300 | -1.15493700 | -0.15983500 |
| O | 0.59210200 | -0.39796500 | 0.97962400  |
| C | 2.98708800 | -4.31499800 | 3.50034400  |
| C | 3.72287700 | -4.09363700 | 2.34090100  |
| C | 3.09792700 | -3.63465700 | 1.17134900  |
| C | 0.96678000 | -3.53874500 | 2.36019200  |
| C | 1.61657800 | -4.05736100 | 3.49281500  |
| C | 3.59059300 | -1.31105700 | -1.21894600 |
| C | 4.04861900 | -2.62469500 | -1.14523100 |
| C | 4.68214800 | -3.18688000 | -2.26501700 |
| C | 4.97211000 | -2.40876400 | -3.38087100 |
| C | 4.62909900 | -1.05567800 | -3.37325900 |
| C | 3.91971800 | -0.47950500 | -2.30724200 |
| H | 1.02782800 | -4.23484900 | 4.38816800  |
| H | 4.88992700 | -0.42650400 | -4.21919100 |
| C | 4.09362300 | -3.61584700 | 0.01583500  |
| C | 5.43461900 | -3.46050900 | 0.81479400  |
| H | 5.58221300 | -2.39992600 | 1.04883300  |
| H | 6.30335300 | -3.79933300 | 0.24219300  |
| H | 6.01515700 | -4.85546300 | -1.86953500 |
| H | 4.64983100 | -5.27389700 | -2.89815700 |
| C | 1.74122900 | -3.31824500 | 1.20543500  |
| H | 3.46953000 | -4.67727900 | 4.40466200  |
| H | 5.47101300 | -2.84002300 | -4.24523100 |
| C | 5.21077400 | -4.25162300 | 2.12040900  |
| H | 5.80409300 | -3.86582800 | 2.95717100  |

|   |             |             |             |
|---|-------------|-------------|-------------|
| H | 5.48513000  | -5.30927800 | 1.99992100  |
| C | 4.94690800  | -4.66088900 | -2.03945500 |
| C | 4.11057100  | -4.96495700 | -0.77537400 |
| H | 3.08331400  | -5.21808800 | -1.06164800 |
| H | 4.50737400  | -5.79412500 | -0.18081700 |
| C | 3.57871200  | 0.97679800  | -2.32610200 |
| C | 2.70373200  | 1.49645800  | -3.31142100 |
| C | 4.18641100  | 1.84576900  | -1.38389000 |
| C | 2.04153100  | 0.67235300  | -4.27784800 |
| C | 2.43491600  | 2.91700900  | -3.34784100 |
| C | 3.87941300  | 3.25753700  | -1.41181500 |
| C | 1.21700600  | 1.21168300  | -5.22950200 |
| H | 2.17250800  | -0.40148300 | -4.22756400 |
| C | 1.57074100  | 3.43940100  | -4.36102600 |
| C | 3.01449400  | 3.75411200  | -2.39102900 |
| C | 0.98524100  | 2.61533000  | -5.28334500 |
| H | 0.71508200  | 0.55876500  | -5.93774300 |
| H | 1.39294200  | 4.51249500  | -4.38020000 |
| H | 2.78314500  | 4.81670000  | -2.40354900 |
| H | 0.33273500  | 3.02453200  | -6.05049300 |
| C | -0.50076800 | -3.25453900 | 2.42973800  |
| C | -0.97479000 | -2.22568400 | 3.27967600  |
| C | -1.41475700 | -4.06065900 | 1.70875200  |
| C | -0.09896600 | -1.33926900 | 3.98749100  |
| C | -2.39767900 | -2.02830000 | 3.43853500  |
| C | -2.83501100 | -3.83870500 | 1.85814600  |
| C | -0.58610600 | -0.35461100 | 4.80759900  |
| H | 0.97005400  | -1.44317100 | 3.84747900  |
| C | -2.86534700 | -0.99934200 | 4.31691500  |
| C | -3.28643200 | -2.84225500 | 2.72942000  |
| C | -1.98999500 | -0.18608700 | 4.98476700  |
| H | 0.10424800  | 0.31293000  | 5.31658900  |
| H | -3.93946100 | -0.87744300 | 4.44076500  |
| H | -4.35769100 | -2.70681700 | 2.86938800  |
| H | -2.35960300 | 0.59325100  | 5.64590000  |
| C | 5.67896900  | 2.25855200  | 0.50985300  |
| H | 6.38206000  | 1.88485500  | 1.24934300  |
| C | 5.12193800  | 1.39569600  | -0.39687900 |
| H | 5.39682900  | 0.34753300  | -0.37459700 |
| C | 5.34778000  | 3.64276500  | 0.49570800  |
| H | 5.79494900  | 4.31041000  | 1.22736200  |
| C | 4.47745400  | 4.12517000  | -0.44370100 |
| H | 4.21525500  | 5.17905000  | -0.47074400 |
| C | -1.90572200 | -5.88131800 | 0.15479200  |

|   |             |             |             |
|---|-------------|-------------|-------------|
| H | -1.55914700 | -6.67481000 | -0.50173400 |
| C | -3.30288400 | -5.64519400 | 0.29138700  |
| H | -4.00906800 | -6.25635500 | -0.26424900 |
| C | -3.75129700 | -4.65583300 | 1.12414200  |
| H | -4.81616600 | -4.46640200 | 1.23605600  |
| C | -0.99689200 | -5.11995700 | 0.84132500  |
| H | 0.06290200  | -5.31739800 | 0.72972100  |
| N | 0.66236900  | -0.92881900 | -1.67065200 |
| S | -0.81063600 | -1.17395700 | -2.15528300 |
| O | -1.23896800 | -0.19495400 | -3.16889200 |
| O | -1.79650100 | -1.43700500 | -1.06186100 |
| C | -0.73938800 | -2.79084600 | -3.08997000 |
| F | 0.12927700  | -2.69056200 | -4.10304100 |
| F | -1.95202700 | -3.06917100 | -3.58788900 |
| F | -0.36056200 | -3.78737800 | -2.28806000 |
| C | -5.20342200 | 0.18993700  | -0.80720100 |
| C | -4.36865900 | 0.49367900  | -2.08742400 |
| H | -5.01876100 | 0.43257300  | -2.97114700 |
| H | -3.62988600 | -0.29818000 | -2.21384300 |
| C | -3.65017700 | 1.79733500  | -2.15673200 |
| C | -4.31161000 | 0.50380500  | 0.45503600  |
| H | -4.72721600 | 1.33033300  | 1.02543600  |
| H | -4.27107300 | -0.37412700 | 1.10764700  |
| N | -2.91593100 | 0.86650400  | 0.16788800  |
| C | -2.28242500 | 1.93664000  | 0.71521700  |
| N | -0.95575300 | 1.83429800  | 0.88135900  |
| C | -0.05385800 | 2.85060100  | 1.30530800  |
| C | -0.00295500 | 4.11148400  | 0.70597700  |
| C | 0.84641300  | 2.51933100  | 2.32177000  |
| C | 0.92088300  | 5.05052900  | 1.16205000  |
| C | 1.76995400  | 3.46695200  | 2.76150100  |
| H | 0.81441400  | 1.52843900  | 2.75935800  |
| C | 1.80726000  | 4.73946800  | 2.19430300  |
| H | 2.51072300  | 5.48024700  | 2.55509900  |
| C | 2.75807700  | 3.09596100  | 3.83727100  |
| C | 1.00246300  | 6.40162800  | 0.50201400  |
| F | 2.24013200  | 2.19313500  | 4.70250400  |
| F | 3.88045500  | 2.55061900  | 3.32355000  |
| F | 3.13663900  | 4.17547200  | 4.55799800  |
| F | 1.30150300  | 7.37290800  | 1.39054200  |
| F | 1.96913000  | 6.44171600  | -0.45277000 |
| F | -0.15415800 | 6.74120600  | -0.10432000 |
| S | -3.18158700 | 3.37648500  | 1.05883000  |
| H | -0.67882600 | 4.36280900  | -0.09973800 |

|   |              |             |             |
|---|--------------|-------------|-------------|
| H | -0.50997500  | 0.88974800  | 0.84759700  |
| H | -2.32988100  | 0.07321900  | -0.13823700 |
| C | -4.15574500  | 3.05344500  | -1.82271600 |
| H | -5.23509400  | 3.16367500  | -1.71831400 |
| H | -3.80466800  | 3.20345100  | -0.57779500 |
| H | -3.64026900  | 3.91541500  | -2.24881400 |
| C | -5.50139300  | -1.35455800 | -0.87079700 |
| H | -4.53157000  | -1.87210400 | -0.85529600 |
| H | -5.96555700  | -1.57308400 | -1.84016400 |
| C | -6.55021100  | 0.94396100  | -0.75164600 |
| C | -7.16568900  | 1.25007900  | 0.47392900  |
| C | -7.26745200  | 1.25718000  | -1.91830500 |
| C | -8.41467800  | 1.86934900  | 0.53230900  |
| H | -6.68136600  | 0.99613600  | 1.41106200  |
| C | -8.51718300  | 1.87695300  | -1.86653700 |
| H | -6.86025000  | 1.02101400  | -2.89635500 |
| C | -9.09704200  | 2.19333400  | -0.63896700 |
| H | -8.85305100  | 2.09418900  | 1.50086500  |
| H | -9.03488900  | 2.11111400  | -2.79297900 |
| H | -10.06784100 | 2.67896900  | -0.59616900 |
| C | -6.37767100  | -1.90309800 | 0.22177000  |
| C | -7.51375400  | -2.57281400 | 0.02196500  |
| H | -7.90536800  | -2.74982700 | -0.97756100 |
| H | -8.09569400  | -2.97170000 | 0.84846700  |
| H | -2.63239900  | 1.73074700  | -2.54232100 |
| H | -6.03201700  | -1.76010700 | 1.24613000  |

TS-EF-3RR-3

1 imaginary frequency

H = -5236.767515

G = -5236.962726

E(M06-2X-DCM) = -5237.608786

E(M06-2X-cyclohexane) = -5237.579822

|   |             |             |             |
|---|-------------|-------------|-------------|
| O | -2.48034200 | -1.18183700 | -0.99578200 |
| O | -1.94257400 | -1.28227700 | 1.54215100  |
| P | -1.39582200 | -0.68429000 | 0.11763600  |
| O | -1.33215300 | 0.80457300  | 0.29357000  |
| C | -6.59763400 | -0.50418000 | -0.63299200 |
| C | -5.98650400 | -1.54494700 | 0.05707200  |
| C | -4.61824700 | -1.81324100 | -0.10899900 |
| C | -4.44039200 | 0.10082200  | -1.61966000 |
| C | -5.82784800 | 0.28550100  | -1.48420400 |
| C | -1.91961300 | -2.66133200 | 1.75984000  |
| C | -2.90557800 | -3.46623900 | 1.19295000  |

|   |             |             |             |
|---|-------------|-------------|-------------|
| C | -2.75476000 | -4.86190200 | 1.23595100  |
| C | -1.71675900 | -5.44145600 | 1.95635600  |
| C | -0.82631400 | -4.61569000 | 2.64259800  |
| C | -0.89306600 | -3.21598300 | 2.54891300  |
| H | -6.29839900 | 1.08194300  | -2.05277300 |
| H | -0.03752800 | -5.05424800 | 3.24658000  |
| C | -4.26436600 | -3.12631100 | 0.58580500  |
| C | -5.36931800 | -3.15133300 | 1.69848200  |
| H | -5.03639000 | -2.52779700 | 2.53643900  |
| H | -5.55017900 | -4.15865500 | 2.08486200  |
| H | -4.57270500 | -6.03737900 | 1.05165400  |
| H | -3.42051800 | -6.30772400 | -0.25132300 |
| C | -3.84844800 | -0.95182200 | -0.89093500 |
| H | -7.66119300 | -0.30990000 | -0.51947600 |
| H | -1.60245400 | -6.52169100 | 1.99768700  |
| C | -6.60759200 | -2.51412500 | 1.03736600  |
| H | -7.26663400 | -2.01744800 | 1.75871100  |
| H | -7.21808300 | -3.26712400 | 0.51940000  |
| C | -3.83040200 | -5.53849100 | 0.41309400  |
| C | -4.45248300 | -4.35611800 | -0.36338600 |
| H | -3.88142700 | -4.17961300 | -1.28094100 |
| H | -5.49912000 | -4.51785400 | -0.63973500 |
| C | 0.07775400  | -2.38717500 | 3.33048400  |
| C | 1.46332100  | -2.45346200 | 3.04300900  |
| C | -0.38265000 | -1.62893100 | 4.43752300  |
| C | 1.98732700  | -3.17267600 | 1.92013000  |
| C | 2.40552300  | -1.76442500 | 3.89754500  |
| C | 0.56903600  | -0.92125400 | 5.26453900  |
| C | 3.33545900  | -3.24014100 | 1.68489700  |
| H | 1.29886700  | -3.64302500 | 1.23035100  |
| C | 3.80567300  | -1.87190100 | 3.62321500  |
| C | 1.93355700  | -1.01271500 | 4.97619700  |
| C | 4.26242700  | -2.59776700 | 2.55546100  |
| H | 3.69939300  | -3.77187800 | 0.81107000  |
| H | 4.50064000  | -1.36434600 | 4.28869600  |
| H | 2.64669600  | -0.49541200 | 5.61536800  |
| H | 5.32661800  | -2.66836000 | 2.35157400  |
| C | -3.68254100 | 1.00179400  | -2.54251800 |
| C | -3.68656800 | 2.40249300  | -2.31227200 |
| C | -3.05728200 | 0.47606100  | -3.70168200 |
| C | -4.29684500 | 3.00590800  | -1.16341400 |
| C | -3.05967600 | 3.28734100  | -3.27015200 |
| C | -2.39267900 | 1.36982500  | -4.62380000 |
| C | -4.35020200 | 4.36800800  | -1.00847300 |

|   |             |             |             |
|---|-------------|-------------|-------------|
| H | -4.72629200 | 2.36472000  | -0.40300600 |
| C | -3.13082400 | 4.70249400  | -3.06883800 |
| C | -2.41438300 | 2.74652900  | -4.38590300 |
| C | -3.77205300 | 5.23439100  | -1.98089000 |
| H | -4.83711200 | 4.79233700  | -0.13429200 |
| H | -2.67643200 | 5.34985300  | -3.81587300 |
| H | -1.94019400 | 3.41569900  | -5.10161900 |
| H | -3.84267900 | 6.31201200  | -1.85555300 |
| C | -2.17422400 | -0.82198000 | 5.89612100  |
| H | -3.22901200 | -0.78830800 | 6.15585700  |
| C | -1.76352000 | -1.55265900 | 4.81122500  |
| H | -2.49509100 | -2.09689600 | 4.22543600  |
| C | -1.23294000 | -0.11180500 | 6.69459500  |
| H | -1.57588500 | 0.45958100  | 7.55309900  |
| C | 0.09895200  | -0.16432400 | 6.38350900  |
| H | 0.83183900  | 0.36216100  | 6.99072500  |
| C | -2.46422700 | -1.39050900 | -5.16129300 |
| H | -2.48833800 | -2.45438400 | -5.37944400 |
| C | -1.78261500 | -0.50958900 | -6.04674700 |
| H | -1.29142100 | -0.90784200 | -6.93015400 |
| C | -1.75453400 | 0.83238400  | -5.78498900 |
| H | -1.25044500 | 1.52029800  | -6.45975600 |
| C | -3.08080800 | -0.91537900 | -4.03499500 |
| H | -3.59578400 | -1.60527800 | -3.37846100 |
| N | -0.01679100 | -1.44747800 | -0.23892600 |
| S | 0.53157600  | -1.95248700 | -1.65193000 |
| O | 1.94793000  | -2.30866200 | -1.47368400 |
| O | 0.16534900  | -1.11133300 | -2.80132900 |
| C | -0.28050200 | -3.61475000 | -1.97578700 |
| F | -0.22101700 | -4.38753800 | -0.88177100 |
| F | 0.37189200  | -4.22582900 | -2.96951700 |
| F | -1.56686200 | -3.48289800 | -2.33248000 |
| C | -0.40572900 | 4.12503900  | 1.23699600  |
| C | -0.69719500 | 3.86791400  | -0.27354400 |
| H | -1.36069800 | 4.64977300  | -0.66866100 |
| H | -1.26236600 | 2.93884800  | -0.36149200 |
| C | 0.46773400  | 3.78974300  | -1.18830700 |
| C | 0.75626000  | 3.16702900  | 1.68462900  |
| H | 1.67312600  | 3.72189000  | 1.86588700  |
| H | 0.47068800  | 2.66963300  | 2.61767600  |
| N | 1.09869900  | 2.12266300  | 0.70790100  |
| C | 2.36820500  | 1.78876900  | 0.37077600  |
| N | 2.58728700  | 0.54323800  | -0.09124100 |
| C | 3.82348800  | 0.11612600  | -0.68460000 |



|   |             |             |             |
|---|-------------|-------------|-------------|
| C | 3.88933500  | -0.08063900 | -2.06332000 |
| C | 4.93412800  | -0.12359800 | 0.12105400  |
| C | 5.08891100  | -0.50249100 | -2.63689800 |
| C | 6.12847600  | -0.54698700 | -0.46403400 |
| H | 4.86160400  | 0.01003700  | 1.19342300  |
| C | 6.21217700  | -0.73457100 | -1.84314700 |
| H | 7.14092600  | -1.06327500 | -2.29472800 |
| C | 7.31263600  | -0.86529100 | 0.40915300  |
| C | 5.19552200  | -0.64551200 | -4.13324400 |
| F | 7.29093700  | -2.15651600 | 0.82970600  |
| F | 8.48115600  | -0.68997400 | -0.24280500 |
| F | 7.34084900  | -0.09650800 | 1.51838300  |
| F | 5.63596100  | 0.50284700  | -4.70398100 |
| F | 6.07196100  | -1.61362900 | -4.48006200 |
| F | 4.01028000  | -0.93822400 | -4.69946900 |
| S | 3.62450000  | 2.97508800  | 0.40497000  |
| H | 3.00833200  | 0.07052300  | -2.67572700 |
| H | 1.83606400  | -0.15534600 | -0.03240200 |
| H | 0.33943300  | 1.43539500  | 0.54261400  |
| C | 1.59111400  | 4.62879000  | -1.20873200 |
| H | 1.52147500  | 5.57285900  | -0.66777400 |
| H | 2.44432400  | 4.01040600  | -0.51614500 |
| H | 2.13246600  | 4.68157200  | -2.15509700 |
| C | -1.73225300 | 3.72981600  | 1.98984500  |
| H | -1.95717000 | 2.68704200  | 1.74201100  |
| H | -2.53823500 | 4.34473300  | 1.56619400  |
| C | -0.07850700 | 5.59821100  | 1.56239300  |
| C | 0.77500700  | 5.94580600  | 2.62391500  |
| C | -0.70550500 | 6.65319400  | 0.87661700  |
| C | 1.01740100  | 7.27878200  | 2.96097900  |
| H | 1.25338300  | 5.17482900  | 3.21860000  |
| C | -0.46383900 | 7.98707600  | 1.20807500  |
| H | -1.40154900 | 6.44693000  | 0.06924400  |
| C | 0.40525400  | 8.30940600  | 2.24998400  |
| H | 1.68754600  | 7.50596700  | 3.78572800  |
| H | -0.96052500 | 8.77463300  | 0.64735900  |
| H | 0.59670000  | 9.34730700  | 2.50747200  |
| C | -1.70424800 | 3.90036600  | 3.48363900  |
| C | -1.79348400 | 2.88984400  | 4.35224300  |
| H | -1.78180100 | 3.05828700  | 5.42595600  |
| H | -1.89198200 | 1.85610000  | 4.02762400  |
| H | -1.61486400 | 4.91894800  | 3.85994800  |
| H | 0.41288800  | 3.00935600  | -1.94807600 |

TS-EF-3RR-4

1 imaginary frequency

H = -5236.763423

G = -5236.957913

E(M06-2X-DCM) = -5237.605529

E(M06-2X-cyclohexane) = -5237.577547

|   |             |             |             |
|---|-------------|-------------|-------------|
| O | -2.98581000 | -0.81246300 | -0.84676000 |
| O | -2.27416900 | -1.45386000 | 1.56363300  |
| P | -1.90845500 | -0.44300400 | 0.32881100  |
| O | -1.99414300 | 0.94344600  | 0.85714500  |
| C | -7.06602700 | -0.36961000 | -0.03184600 |
| C | -6.39078000 | -1.52971600 | 0.33293000  |
| C | -5.03879200 | -1.70566500 | 0.00117800  |
| C | -5.01083200 | 0.51065900  | -1.02740800 |
| C | -6.38000100 | 0.62310200  | -0.73099300 |
| C | -2.17315700 | -2.83495800 | 1.40921400  |
| C | -3.18065600 | -3.53176100 | 0.74345000  |
| C | -2.98035500 | -4.88624400 | 0.43073900  |
| C | -1.86160700 | -5.56532500 | 0.89976800  |
| C | -0.93642900 | -4.88197600 | 1.68866600  |
| C | -1.05559400 | -3.50602800 | 1.94651300  |
| H | -6.90274900 | 1.52130000  | -1.04647300 |
| H | -0.08286600 | -5.41173500 | 2.10086200  |
| C | -4.59746100 | -3.12596100 | 0.33920900  |
| C | -5.60989100 | -3.45885100 | 1.48969000  |
| H | -5.22277700 | -3.04335100 | 2.42731300  |
| H | -5.74136600 | -4.53559200 | 1.63249200  |
| H | -4.77386200 | -6.07122200 | 0.11827800  |
| H | -3.73481700 | -5.97612700 | -1.29935300 |
| C | -4.35123100 | -0.66353900 | -0.61628600 |
| H | -8.11597800 | -0.23590900 | 0.21629400  |
| H | -1.71124400 | -6.61698600 | 0.66915200  |
| C | -6.91045500 | -2.72731500 | 1.09671200  |
| H | -7.51591200 | -2.44321400 | 1.96501800  |
| H | -7.54791300 | -3.35769300 | 0.46069900  |
| C | -4.10461800 | -5.40298500 | -0.44143100 |
| C | -4.82477500 | -4.10273500 | -0.86192100 |
| H | -4.33606300 | -3.68273200 | -1.74837900 |
| H | -5.88503700 | -4.24506000 | -1.09366100 |
| C | -0.04148400 | -2.83534700 | 2.81890000  |
| C | 1.32540400  | -2.82118500 | 2.44138500  |
| C | -0.43314100 | -2.31625200 | 4.08106700  |
| C | 1.78942700  | -3.29970200 | 1.17187500  |
| C | 2.31619400  | -2.30313800 | 3.35922300  |

|   |             |             |             |
|---|-------------|-------------|-------------|
| C | 0.56408600  | -1.75611300 | 4.96524900  |
| C | 3.12559200  | -3.32750000 | 0.86432500  |
| H | 1.06348600  | -3.62578300 | 0.43750500  |
| C | 3.70010100  | -2.35317400 | 2.99922100  |
| C | 1.90849900  | -1.77238400 | 4.58502000  |
| C | 4.10127300  | -2.86683200 | 1.79552100  |
| H | 3.44388300  | -3.69391900 | -0.10766500 |
| H | 4.42977400  | -1.98171500 | 3.71554300  |
| H | 2.65777400  | -1.37640600 | 5.26797700  |
| H | 5.15691900  | -2.90461100 | 1.54058100  |
| C | -4.33393700 | 1.60757000  | -1.78754900 |
| C | -4.22077700 | 2.89810800  | -1.21373600 |
| C | -3.89226200 | 1.37846900  | -3.11457300 |
| C | -4.62715100 | 3.19076200  | 0.12892600  |
| C | -3.67092000 | 3.98280600  | -1.99625300 |
| C | -3.31272500 | 2.46441900  | -3.87214100 |
| C | -4.54766200 | 4.46021900  | 0.64036400  |
| H | -4.99291500 | 2.38214600  | 0.75028400  |
| C | -3.60257400 | 5.29317100  | -1.42434400 |
| C | -3.22378500 | 3.73465100  | -3.29661600 |
| C | -4.03828000 | 5.53260800  | -0.14761900 |
| H | -4.86961800 | 4.65227600  | 1.66042400  |
| H | -3.20871800 | 6.10109100  | -2.03744400 |
| H | -2.80796300 | 4.55351400  | -3.88096100 |
| H | -3.99798000 | 6.53606100  | 0.26850800  |
| C | -2.12877800 | -1.83614400 | 5.77780100  |
| H | -3.16387800 | -1.87575000 | 6.10643500  |
| C | -1.78448800 | -2.34846900 | 4.55443500  |
| H | -2.54854800 | -2.79623300 | 3.93059900  |
| C | -1.14612700 | -1.25524900 | 6.62800600  |
| H | -1.43863100 | -0.84959600 | 7.59274800  |
| C | 0.16250900  | -1.22358800 | 6.23045800  |
| H | 0.92883500  | -0.79846400 | 6.87455100  |
| C | -3.58277600 | -0.07632400 | -5.05304000 |
| H | -3.68711800 | -1.05163400 | -5.52047000 |
| C | -2.99002400 | 0.99080800  | -5.78486400 |
| H | -2.64438100 | 0.82051300  | -6.80083000 |
| C | -2.86479900 | 2.22510900  | -5.20868900 |
| H | -2.42456600 | 3.05327200  | -5.75930400 |
| C | -4.02053300 | 0.11205900  | -3.76897300 |
| H | -4.47548600 | -0.71192900 | -3.23254500 |
| N | -0.47611700 | -0.93847100 | -0.28377200 |
| S | -0.04821500 | -1.02850900 | -1.80672000 |
| O | 1.40115200  | -1.36484100 | -1.82902300 |

|   |             |             |             |
|---|-------------|-------------|-------------|
| O | -0.48630800 | 0.07677100  | -2.67381100 |
| C | -0.79248500 | -2.59232600 | -2.55028300 |
| F | -0.71216500 | -3.59852600 | -1.66909400 |
| F | -0.09312100 | -2.91485000 | -3.64192500 |
| F | -2.07152800 | -2.42672800 | -2.89761200 |
| C | 0.19901700  | 3.70371400  | 1.33264700  |
| C | -0.27070200 | 3.50018900  | -0.14971300 |
| H | -0.86164600 | 4.37431800  | -0.45453100 |
| H | -0.95527400 | 2.64953200  | -0.17224700 |
| C | 0.79557100  | 3.29744600  | -1.17707200 |
| C | 1.01425200  | 2.42249300  | 1.75485200  |
| H | 1.87955600  | 2.67099500  | 2.36329400  |
| H | 0.35617400  | 1.79589700  | 2.35838200  |
| N | 1.48788700  | 1.52373200  | 0.67198400  |
| C | 2.77607800  | 1.32607000  | 0.31454300  |
| N | 3.08982400  | 0.17240900  | -0.29542600 |
| C | 4.36354600  | -0.19264600 | -0.81500100 |
| C | 4.45033400  | -0.61949200 | -2.14307700 |
| C | 5.49132700  | -0.21418600 | 0.00637400  |
| C | 5.67996100  | -1.04535400 | -2.64710700 |
| C | 6.71148700  | -0.64734700 | -0.51061400 |
| H | 5.41134600  | 0.07783900  | 1.04614200  |
| C | 6.81666600  | -1.05921400 | -1.83876100 |
| H | 7.76941100  | -1.38672900 | -2.23683100 |
| C | 7.88963500  | -0.76571300 | 0.41907600  |
| C | 5.76656400  | -1.54874200 | -4.06597100 |
| F | 7.81430300  | -1.90505000 | 1.15289700  |
| F | 9.06190500  | -0.79924700 | -0.24559700 |
| F | 7.94155000  | 0.25860200  | 1.29663100  |
| F | 7.00022000  | -1.36137300 | -4.58476000 |
| F | 5.50438900  | -2.87251000 | -4.13692100 |
| F | 4.88386000  | -0.92434200 | -4.87244800 |
| S | 3.91455300  | 2.62439500  | 0.47197200  |
| H | 3.56192000  | -0.62660100 | -2.76407700 |
| H | 2.33011700  | -0.46916300 | -0.58085400 |
| H | 0.83840000  | 0.75681400  | 0.45761800  |
| C | 1.93559800  | 4.06657700  | -1.35192700 |
| H | 1.97629100  | 5.05965500  | -0.90776300 |
| H | 2.81586900  | 3.48228600  | -0.48668100 |
| H | 2.48801400  | 3.94201600  | -2.28314300 |
| C | -1.11557400 | 3.72864100  | 2.17920100  |
| H | -1.68202100 | 2.82481200  | 1.92539600  |
| H | -1.73764200 | 4.56179400  | 1.82576400  |
| C | 0.92576100  | 5.06286100  | 1.50556700  |

|   |             |            |             |
|---|-------------|------------|-------------|
| C | 2.17965700  | 5.23190700 | 2.10874400  |
| C | 0.26890200  | 6.22999100 | 1.06971900  |
| C | 2.75850700  | 6.49603600 | 2.25491400  |
| H | 2.74297900  | 4.37934900 | 2.46565800  |
| C | 0.84092100  | 7.49276600 | 1.21154000  |
| H | -0.71384100 | 6.16174100 | 0.61170700  |
| C | 2.09637500  | 7.63497400 | 1.80468100  |
| H | 3.73492000  | 6.58044200 | 2.72474300  |
| H | 0.30030100  | 8.36726400 | 0.85873900  |
| H | 2.54666700  | 8.61739100 | 1.91640000  |
| C | -1.05028900 | 3.81379900 | 3.68335000  |
| C | -0.00738200 | 3.90722900 | 4.50973400  |
| H | -0.15612700 | 3.93943400 | 5.58575000  |
| H | 1.02082700  | 3.96870000 | 4.17108400  |
| H | -2.04313300 | 3.77038000 | 4.13532400  |
| H | 0.63883900  | 2.45757100 | -1.85560200 |

TS-EF-3RR-5

1 imaginary frequency

H = -5236.767926

G = -5236.963488

E(M06-2X-DCM) = -5237.611213

E(M06-2X-cyclohexane) = -5237.580904

|   |            |             |             |
|---|------------|-------------|-------------|
| O | 2.26730200 | -1.87065300 | -0.01037200 |
| O | 1.94076700 | 0.15566900  | -1.59602900 |
| P | 1.27061900 | -0.62153700 | -0.31305700 |
| O | 1.20913200 | 0.41309300  | 0.77302900  |
| C | 6.34165400 | -1.27625400 | 0.72494400  |
| C | 5.85720000 | -1.32389900 | -0.57803400 |
| C | 4.50069000 | -1.58240000 | -0.83135800 |
| C | 4.08183600 | -1.66333100 | 1.57724400  |
| C | 5.45800200 | -1.47331600 | 1.78607800  |
| C | 2.00083700 | -0.47874800 | -2.83615700 |
| C | 2.98681500 | -1.43419900 | -3.07638300 |
| C | 2.91090000 | -2.21027100 | -4.24461600 |
| C | 1.95618100 | -1.93750800 | -5.21782500 |
| C | 1.06984900 | -0.87834000 | -5.02022300 |
| C | 1.05706300 | -0.13946700 | -3.82628100 |
| H | 5.82830700 | -1.46350300 | 2.80706800  |
| H | 0.34638100 | -0.62749600 | -5.79036700 |
| C | 4.27683000 | -1.77267100 | -2.32952200 |
| C | 5.46762900 | -0.91978500 | -2.89068500 |
| H | 5.16715700 | 0.13442800  | -2.90498800 |
| H | 5.73884500 | -1.20218400 | -3.91225200 |

|   |              |              |              |
|---|--------------|--------------|--------------|
| H | 4. 77217800  | -3. 09522700 | -4. 93215600 |
| H | 3. 54252900  | -4. 27931600 | -4. 50254500 |
| C | 3. 62353400  | -1. 68982800 | 0. 24534200  |
| H | 7. 39531500  | -1. 09196500 | 0. 91920900  |
| H | 1. 90196400  | -2. 53203200 | -6. 12625800 |
| C | 6. 61020600  | -1. 11897200 | -1. 87355700 |
| H | 7. 29511600  | -0. 26431000 | -1. 83204600 |
| H | 7. 21927300  | -1. 99925800 | -2. 12297200 |
| C | 3. 95765200  | -3. 30388700 | -4. 22456800 |
| C | 4. 45336300  | -3. 26615500 | -2. 76144200 |
| H | 3. 80234200  | -3. 88842100 | -2. 13807600 |
| H | 5. 48182500  | -3. 62033200 | -2. 63963900 |
| C | 0. 09330400  | 0. 99715800  | -3. 67727700 |
| C | -1. 30289300 | 0. 75308300  | -3. 66304600 |
| C | 0. 58026200  | 2. 32973600  | -3. 65134000 |
| C | -1. 85795200 | -0. 56710700 | -3. 64316900 |
| C | -2. 22562600 | 1. 86766000  | -3. 64555000 |
| C | -0. 35454900 | 3. 43280200  | -3. 60540900 |
| C | -3. 21284200 | -0. 77024700 | -3. 63681100 |
| H | -1. 18944300 | -1. 41605200 | -3. 59332700 |
| C | -3. 63336200 | 1. 61127600  | -3. 65676100 |
| C | -1. 72820600 | 3. 17265400  | -3. 61153600 |
| C | -4. 11709400 | 0. 32993400  | -3. 65905900 |
| H | -3. 60093800 | -1. 78273600 | -3. 58690900 |
| H | -4. 31112700 | 2. 46213000  | -3. 66091500 |
| H | -2. 42703900 | 4. 00697100  | -3. 59652200 |
| H | -5. 18725300 | 0. 14480000  | -3. 64764000 |
| C | 3. 16347700  | -1. 84343000 | 2. 74375900  |
| C | 2. 98889200  | -0. 78893500 | 3. 67468300  |
| C | 2. 51026000  | -3. 08471200 | 2. 94434200  |
| C | 3. 63568200  | 0. 48367900  | 3. 54654700  |
| C | 2. 12492700  | -0. 98260000 | 4. 81815600  |
| C | 1. 63354800  | -3. 25541700 | 4. 08028800  |
| C | 3. 47782000  | 1. 46774000  | 4. 48949400  |
| H | 4. 26695600  | 0. 66382000  | 2. 68423700  |
| C | 1. 97167700  | 0. 07654700  | 5. 76795000  |
| C | 1. 46290700  | -2. 20213100 | 4. 98184100  |
| C | 2. 63441300  | 1. 26588000  | 5. 61971600  |
| H | 4. 00327900  | 2. 41303000  | 4. 37561400  |
| H | 1. 32437900  | -0. 09410100 | 6. 62547600  |
| H | 0. 80872700  | -2. 34021400 | 5. 84059800  |
| H | 2. 52553200  | 2. 05313500  | 6. 36142000  |
| C | 2. 41509700  | 3. 95016000  | -3. 67397200 |
| H | 3. 48053600  | 4. 15996100  | -3. 71316800 |

|   |              |              |              |
|---|--------------|--------------|--------------|
| C | 1. 97538100  | 2. 65193000  | -3. 69908800 |
| H | 2. 69578300  | 1. 84501300  | -3. 76509000 |
| C | 1. 48999100  | 5. 03089300  | -3. 60590200 |
| H | 1. 85540300  | 6. 05438800  | -3. 59513700 |
| C | 0. 14476900  | 4. 77415000  | -3. 57715200 |
| H | -0. 57566500 | 5. 58904000  | -3. 55102900 |
| C | 2. 05219200  | -5. 39622000 | 2. 30318600  |
| H | 2. 20963700  | -6. 23119400 | 1. 62603500  |
| C | 1. 16913400  | -5. 54929900 | 3. 40870800  |
| H | 0. 65729500  | -6. 49525500 | 3. 56198500  |
| C | 0. 97130500  | -4. 50770100 | 4. 27248300  |
| H | 0. 30578700  | -4. 61194300 | 5. 12605000  |
| C | 2. 69890800  | -4. 21005600 | 2. 08054700  |
| H | 3. 37022800  | -4. 11697500 | 1. 23511100  |
| N | -0. 12793400 | -1. 26859700 | -0. 80010100 |
| S | -0. 76213200 | -2. 69880900 | -0. 43795900 |
| O | -2. 15406900 | -2. 69634800 | -0. 90784100 |
| O | -0. 47756900 | -3. 17090600 | 0. 92363000  |
| C | 0. 07182300  | -3. 94549000 | -1. 57201000 |
| F | 0. 13831100  | -3. 47537600 | -2. 82758700 |
| F | -0. 65003800 | -5. 07023600 | -1. 57439200 |
| F | 1. 31410200  | -4. 23918100 | -1. 16503900 |
| C | 0. 67734100  | 4. 03238800  | 1. 29514200  |
| C | 0. 85429800  | 3. 08123000  | 2. 51618000  |
| H | 1. 49224800  | 3. 56094200  | 3. 27151300  |
| H | 1. 40388500  | 2. 19841100  | 2. 18563000  |
| C | -0. 37410200 | 2. 60554200  | 3. 20708000  |
| C | -0. 54519200 | 3. 52994200  | 0. 44317100  |
| H | -1. 41446500 | 4. 16447300  | 0. 60606100  |
| H | -0. 29097500 | 3. 57719300  | -0. 62205600 |
| N | -0. 95038400 | 2. 15239800  | 0. 74596300  |
| C | -2. 23945400 | 1. 72466000  | 0. 77023100  |
| N | -2. 45847300 | 0. 43869000  | 0. 44293000  |
| C | -3. 70344000 | -0. 25427100 | 0. 59507600  |
| C | -3. 76392100 | -1. 35930500 | 1. 44412600  |
| C | -4. 82112600 | 0. 13664200  | -0. 13924500 |
| C | -4. 96310900 | -2. 06062800 | 1. 57018700  |
| C | -6. 01442700 | -0. 57371600 | -0. 00514600 |
| H | -4. 75339500 | 0. 97311300  | -0. 82356500 |
| C | -6. 09294700 | -1. 67123000 | 0. 85085000  |
| H | -7. 02043600 | -2. 22253000 | 0. 95002100  |
| C | -7. 19649100 | -0. 18588600 | -0. 85286600 |
| C | -5. 06101800 | -3. 20956000 | 2. 54054400  |
| F | -7. 11415000 | -0. 71897700 | -2. 09857400 |

|   |             |             |             |
|---|-------------|-------------|-------------|
| F | -8.36192400 | -0.61064200 | -0.32214400 |
| F | -7.28064900 | 1.15295800  | -1.01088700 |
| F | -5.48677200 | -2.78557900 | 3.75675100  |
| F | -5.94555500 | -4.14111200 | 2.12213300  |
| F | -3.87581500 | -3.81737100 | 2.72714900  |
| S | -3.48732800 | 2.77005700  | 1.34259200  |
| H | -2.87857600 | -1.68517700 | 1.97871300  |
| H | -1.69310900 | -0.09362600 | 0.00028000  |
| H | -0.21104300 | 1.43483600  | 0.61183300  |
| C | -1.48690000 | 3.36119600  | 3.60497000  |
| H | -1.38745600 | 4.44702700  | 3.60258600  |
| H | -2.32899300 | 3.18098800  | 2.68096600  |
| H | -2.06270800 | 2.95667600  | 4.43971000  |
| C | 1.97612500  | 3.90271300  | 0.41748700  |
| H | 1.86887400  | 4.56332500  | -0.44961100 |
| H | 2.01460600  | 2.87334100  | 0.03740000  |
| C | 0.46568900  | 5.51585700  | 1.64467200  |
| C | 0.07564400  | 6.40214300  | 0.62392400  |
| C | 0.68573900  | 6.05841000  | 2.91774100  |
| C | -0.10367800 | 7.76213600  | 0.86912300  |
| H | -0.08319400 | 6.02883800  | -0.38456100 |
| C | 0.50634000  | 7.42179100  | 3.16911500  |
| H | 1.00292700  | 5.42543400  | 3.74020600  |
| C | 0.10838300  | 8.28090200  | 2.14766100  |
| H | -0.40913300 | 8.41735800  | 0.05762800  |
| H | 0.68287200  | 7.80716200  | 4.16987100  |
| H | -0.03191700 | 9.34043800  | 2.34237700  |
| C | 3.26171100  | 4.21576400  | 1.13348000  |
| C | 4.02012700  | 5.28896700  | 0.90482100  |
| H | 4.94918300  | 5.45897500  | 1.44275400  |
| H | 3.74258200  | 6.03805500  | 0.16626700  |
| H | 3.58850700  | 3.48923100  | 1.87814000  |
| H | -0.37057300 | 1.54819600  | 3.47082900  |

TS-1-1-3RS

1 imaginary frequency

H = -5236.769404

G = -5236.963926

E(M06-2X-DCM) = -5237.610978

|   |            |             |             |
|---|------------|-------------|-------------|
| C | 4.41952900 | -1.69647100 | -0.95734300 |
| C | 3.65519200 | -1.58940000 | -2.32132300 |
| H | 3.85678200 | -2.51622800 | -2.87461500 |
| H | 4.07711000 | -0.74671900 | -2.87631400 |
| C | 2.17286600 | -1.42740900 | -2.28028700 |



|   |              |              |              |
|---|--------------|--------------|--------------|
| C | 4. 16165300  | -0. 37903100 | -0. 14799100 |
| H | 4. 24497600  | -0. 58685700 | 0. 92323600  |
| H | 4. 92148600  | 0. 35574800  | -0. 41337000 |
| N | 2. 86688500  | 0. 25519400  | -0. 38695100 |
| C | 2. 75952900  | 1. 56455600  | -0. 86675700 |
| N | 1. 47234200  | 2. 00928800  | -0. 78611700 |
| C | 0. 89566900  | 3. 28601500  | -0. 90094700 |
| C | 1. 56391500  | 4. 46963400  | -1. 24754400 |
| C | -0. 47575100 | 3. 34638100  | -0. 59602100 |
| C | 0. 85951500  | 5. 67547400  | -1. 27239000 |
| C | -1. 15471400 | 4. 55925300  | -0. 62002500 |
| H | -1. 00001000 | 2. 43739400  | -0. 32515000 |
| C | -0. 49698300 | 5. 74206700  | -0. 95798600 |
| H | -1. 02477500 | 6. 68725600  | -0. 97263300 |
| C | -2. 59882500 | 4. 57105100  | -0. 20133500 |
| C | 1. 57774900  | 6. 92598700  | -1. 71125200 |
| F | -3. 30249300 | 3. 57357700  | -0. 78832000 |
| F | -2. 73268000 | 4. 38884100  | 1. 14111800  |
| F | -3. 21445000 | 5. 73212200  | -0. 50199300 |
| F | 1. 01771600  | 8. 03755300  | -1. 18112700 |
| F | 2. 87805400  | 6. 91598900  | -1. 35070400 |
| F | 1. 54210800  | 7. 07281400  | -3. 05625600 |
| S | 4. 06358400  | 2. 39970400  | -1. 51481700 |
| H | 2. 61677900  | 4. 44680100  | -1. 48720300 |
| C | 1. 24041800  | -2. 42112700 | -1. 97721700 |
| H | 0. 76216500  | 1. 27818400  | -0. 64671900 |
| H | 1. 60800700  | -3. 44399300 | -1. 89180600 |
| H | 0. 27800000  | -2. 30451700 | -2. 48235200 |
| H | 2. 13745200  | -0. 01375500 | 0. 26639700  |
| H | 0. 76325300  | -2. 19409400 | -0. 80552000 |
| O | -2. 53341500 | -1. 38572500 | 0. 05618900  |
| O | -1. 11664300 | 0. 24338400  | 1. 50108200  |
| P | -1. 04843700 | -0. 76013400 | 0. 22315600  |
| O | -0. 54500100 | 0. 07224100  | -0. 90814700 |
| C | -5. 60787900 | 1. 29074500  | -0. 91669100 |
| C | -5. 22427500 | 1. 10717200  | 0. 40677300  |
| C | -4. 24892700 | 0. 15554000  | 0. 74929600  |
| C | -3. 95814700 | -0. 36662100 | -1. 62338800 |
| C | -4. 99216400 | 0. 53622500  | -1. 91516500 |
| C | -1. 53416000 | -0. 11891300 | 2. 78801300  |
| C | -2. 88457800 | -0. 33854100 | 3. 04333700  |
| C | -3. 24974600 | -0. 88526200 | 4. 28394500  |
| C | -2. 30421400 | -1. 06709200 | 5. 28751100  |
| C | -0. 98443000 | -0. 67917700 | 5. 05720600  |

|   |             |             |             |
|---|-------------|-------------|-------------|
| C | -0.56392200 | -0.20653800 | 3.80394000  |
| H | -5.28538600 | 0.66597900  | -2.95279500 |
| H | -0.25050900 | -0.75480600 | 5.85390800  |
| C | -4.14630100 | 0.03870200  | 2.26724500  |
| C | -4.61672900 | 1.47915200  | 2.67493600  |
| H | -4.96956200 | 1.52620900  | 3.70939200  |
| H | -3.77016600 | 2.16818200  | 2.57453200  |
| H | -5.27263000 | -0.49257900 | 4.96461400  |
| H | -4.93785100 | -2.19975100 | 4.69499500  |
| C | -3.59676300 | -0.52560200 | -0.27249700 |
| H | -6.36725200 | 2.02341700  | -1.17687300 |
| H | -2.59015700 | -1.48133000 | 6.25086600  |
| C | -5.69377000 | 1.85243300  | 1.63549800  |
| H | -5.75372700 | 2.93294300  | 1.46503400  |
| H | -6.69322200 | 1.52108800  | 1.94982100  |
| C | -4.73143700 | -1.19331700 | 4.31378700  |
| C | -5.14375900 | -1.02456000 | 2.83451400  |
| H | -4.99344100 | -1.96797000 | 2.29744600  |
| H | -6.18904900 | -0.72699300 | 2.70576100  |
| C | 0.84540500  | 0.26134500  | 3.61419200  |
| C | 1.93077400  | -0.63921800 | 3.76036500  |
| C | 1.09253500  | 1.63966800  | 3.37554600  |
| C | 1.75059500  | -2.04521000 | 3.97170300  |
| C | 3.28796100  | -0.14246900 | 3.68027500  |
| C | 2.45409600  | 2.11349300  | 3.26466900  |
| C | 2.82211400  | -2.88840100 | 4.11422900  |
| H | 0.74546200  | -2.44849700 | 3.99407500  |
| C | 4.37755300  | -1.05509300 | 3.85215300  |
| C | 3.51155300  | 1.21402300  | 3.42876800  |
| C | 4.15499700  | -2.38964600 | 4.06654800  |
| H | 2.65192200  | -3.95190700 | 4.25268500  |
| H | 5.38987100  | -0.65815100 | 3.81520100  |
| H | 4.53380100  | 1.58092900  | 3.36097600  |
| H | 4.99053600  | -3.07189800 | 4.19896100  |
| C | -3.28300300 | -1.11052500 | -2.73305800 |
| C | -2.41982000 | -0.42215600 | -3.61962100 |
| C | -3.55030600 | -2.48839500 | -2.91908200 |
| C | -2.12493900 | 0.97481000  | -3.49333000 |
| C | -1.78783300 | -1.14642200 | -4.70055300 |
| C | -2.90448600 | -3.20146000 | -3.99745100 |
| C | -1.28565400 | 1.60683000  | -4.37259900 |
| H | -2.56814300 | 1.53559200  | -2.67909400 |
| C | -0.91495700 | -0.44765900 | -5.59367000 |
| C | -2.03873300 | -2.51352100 | -4.85289600 |

|   |             |             |             |
|---|-------------|-------------|-------------|
| C | -0.67130700 | 0.89024000  | -5.43973000 |
| H | -1.07672600 | 2.66602800  | -4.25098600 |
| H | -0.45350700 | -1.00724600 | -6.40423300 |
| H | -1.55857600 | -3.05318500 | -5.66705400 |
| H | -0.00995800 | 1.41127500  | -6.12676700 |
| C | 0.32039800  | 3.93144800  | 3.00207900  |
| H | -0.49952800 | 4.63539300  | 2.89294400  |
| C | 0.04786200  | 2.61214000  | 3.25391600  |
| H | -0.98187900 | 2.29549900  | 3.36802900  |
| C | 1.66301600  | 4.38455600  | 2.86607400  |
| H | 1.86066400  | 5.43250600  | 2.65943200  |
| C | 2.69703900  | 3.49849800  | 3.00153800  |
| H | 3.72819700  | 3.83026300  | 2.90902500  |
| C | -4.70461000 | -4.55158500 | -2.30201500 |
| H | -5.40406800 | -5.08070600 | -1.66049600 |
| C | -4.04864000 | -5.25425300 | -3.35241900 |
| H | -4.24969900 | -6.31178700 | -3.50021200 |
| C | -3.17584300 | -4.59417800 | -4.17461500 |
| H | -2.67583800 | -5.11641500 | -4.98701800 |
| C | -4.46344900 | -3.21882300 | -2.09329000 |
| H | -4.97426600 | -2.69819800 | -1.29089600 |
| N | -0.06550000 | -2.06987700 | 0.42202000  |
| S | -0.33729500 | -3.46455700 | 1.23345500  |
| C | -1.48409000 | -4.47933200 | 0.12897200  |
| O | 0.91955700  | -4.21642000 | 1.22029400  |
| O | -1.08288400 | -3.26888900 | 2.47824900  |
| F | -1.25692700 | -5.77285000 | 0.36859700  |
| F | -1.22594600 | -4.22472100 | -1.16179800 |
| F | -2.75841100 | -4.20547700 | 0.39184000  |
| C | 5.94064300  | -1.79485600 | -1.19884500 |
| C | 6.80268200  | -1.77047900 | -0.08708400 |
| C | 6.52632100  | -1.89922900 | -2.46768700 |
| C | 8.18592100  | -1.84145800 | -0.23803800 |
| H | 6.39127900  | -1.69262000 | 0.91555400  |
| C | 7.91325000  | -1.97571600 | -2.62261300 |
| H | 5.91100600  | -1.92133300 | -3.36043800 |
| C | 8.75061600  | -1.94625400 | -1.51023100 |
| H | 8.82286100  | -1.81592700 | 0.64219900  |
| H | 8.33378200  | -2.05644700 | -3.62145600 |
| H | 9.82878900  | -2.00374900 | -1.63082000 |
| C | 3.96256000  | -2.94545100 | -0.14182800 |
| H | 4.52399700  | -2.92989400 | 0.80244500  |
| H | 2.91131700  | -2.86325100 | 0.15022400  |
| C | 4.21504900  | -4.26520900 | -0.82762900 |

|   |            |             |             |
|---|------------|-------------|-------------|
| C | 3.37102900 | -5.30032600 | -0.84245700 |
| H | 2.40690300 | -5.26368600 | -0.34210000 |
| H | 3.63984700 | -6.23490000 | -1.32910900 |
| H | 5.18596500 | -4.36819200 | -1.31309600 |
| H | 1.77269200 | -0.47937500 | -2.63118200 |

TS-1-1-3SR

l imaginary frequency

H = -5236.776184

G = -5236.967472

E(M06-2X-DCM) = -5237.613406

|   |             |             |             |
|---|-------------|-------------|-------------|
| C | 2.88035900  | 3.59872000  | 0.44390600  |
| C | 2.12823900  | 3.79437900  | 1.81311800  |
| H | 2.84940000  | 3.62059600  | 2.61790100  |
| H | 1.79590300  | 4.83824200  | 1.85165700  |
| C | 0.92812600  | 2.94680800  | 2.04240300  |
| C | 1.84967000  | 3.78698800  | -0.69981900 |
| H | 2.33921600  | 3.61230900  | -1.66461900 |
| H | 1.47505600  | 4.81170000  | -0.69370600 |
| N | 0.69816500  | 2.89729100  | -0.59758300 |
| C | -0.60205900 | 3.31316900  | -0.85078900 |
| N | -1.40458000 | 2.25113600  | -1.15759400 |
| C | -2.75224600 | 2.13148500  | -1.52794100 |
| C | -3.70920600 | 3.15668500  | -1.51803400 |
| C | -3.13753000 | 0.84366600  | -1.94400900 |
| C | -5.01456000 | 2.87922100  | -1.92854500 |
| C | -4.44130000 | 0.59242500  | -2.35457500 |
| H | -2.40787000 | 0.04022000  | -1.94276600 |
| C | -5.39712200 | 1.60916300  | -2.35703000 |
| H | -6.41048000 | 1.41758700  | -2.68828200 |
| C | -4.83398200 | -0.81213900 | -2.72239100 |
| C | -6.05922600 | 3.96107200  | -1.83210600 |
| F | -5.90021300 | -0.84643000 | -3.54596500 |
| F | -5.16639400 | -1.54198600 | -1.62127600 |
| F | -3.82592000 | -1.48155300 | -3.32905800 |
| F | -6.70491600 | 3.91559500  | -0.63749500 |
| F | -7.00643400 | 3.82969100  | -2.78716600 |
| F | -5.53187800 | 5.19511900  | -1.94560800 |
| S | -1.07694200 | 4.92144700  | -0.70726800 |
| C | 3.52874100  | 2.17582800  | 0.37217700  |
| H | 4.05095000  | 2.10014200  | -0.58732900 |
| H | 2.73759500  | 1.41834200  | 0.34726900  |
| H | -3.43228300 | 4.15148100  | -1.20089600 |
| C | 0.91283700  | 1.75619200  | 2.77931100  |

|   |             |             |             |
|---|-------------|-------------|-------------|
| H | -0.92975000 | 1.34204500  | -1.11153000 |
| H | 1.77253400  | 1.56186200  | 3.42421600  |
| H | -0.04983300 | 1.49726500  | 3.22440800  |
| H | 0.88167400  | 1.91517800  | -0.80924700 |
| H | 1.04967700  | 0.75014700  | 2.04102000  |
| O | -1.22268500 | -1.43990700 | 0.60286300  |
| O | 0.98666500  | -2.43042200 | -0.38582000 |
| P | 0.31997500  | -1.07689800 | 0.21976900  |
| O | 0.23405900  | 0.04681200  | -0.76557600 |
| C | -2.13170500 | -4.71020100 | 3.06586600  |
| C | -1.76829900 | -4.90456400 | 1.73820300  |
| C | -1.55256000 | -3.81013300 | 0.88706700  |
| C | -2.00985800 | -2.28612500 | 2.74260900  |
| C | -2.29041800 | -3.41004200 | 3.53950700  |
| C | 0.49511800  | -2.85844800 | -1.63546700 |
| C | -0.67952400 | -3.60450900 | -1.66775700 |
| C | -1.27676200 | -3.87987000 | -2.90876000 |
| C | -0.65482900 | -3.50394600 | -4.09421400 |
| C | 0.57657800  | -2.85119200 | -4.03758500 |
| C | 1.17272700  | -2.49769800 | -2.81592700 |
| H | -2.62443400 | -3.24420700 | 4.55910100  |
| H | 1.08977300  | -2.58162600 | -4.95608500 |
| C | -1.45171400 | -4.30327500 | -0.55472800 |
| C | -0.89829700 | -5.74819000 | -0.31620300 |
| H | -1.09691000 | -6.41402600 | -1.16184100 |
| H | 0.18767100  | -5.69075700 | -0.18060400 |
| H | -3.39255000 | -4.14138600 | -3.34144800 |
| H | -2.53623400 | -5.64182900 | -2.98446600 |
| C | -1.58211500 | -2.52242700 | 1.42051100  |
| H | -2.31080600 | -5.55672100 | 3.72369000  |
| H | -1.11462400 | -3.71949700 | -5.05522000 |
| C | -1.56375800 | -6.20804900 | 0.99826000  |
| H | -2.52116800 | -6.71339200 | 0.80942300  |
| H | -0.94143900 | -6.91301800 | 1.56092400  |
| C | -2.60484000 | -4.57785500 | -2.71864900 |
| C | -2.87297300 | -4.38293700 | -1.21097200 |
| H | -3.48736200 | -5.17504400 | -0.77253300 |
| H | -3.39447600 | -3.43261700 | -1.05593300 |
| C | 2.50462100  | -1.81248000 | -2.82881200 |
| C | 3.66645400  | -2.55406300 | -2.50104300 |
| C | 2.61721100  | -0.47187600 | -3.26859200 |
| C | 3.62598300  | -3.93816900 | -2.13726800 |
| C | 4.96205900  | -1.91680600 | -2.56422400 |
| C | 3.92268400  | 0.14489200  | -3.35178400 |

|   |              |              |              |
|---|--------------|--------------|--------------|
| C | 4. 76905100  | -4. 62958800 | -1. 83279000 |
| H | 2. 66755200  | -4. 44391000 | -2. 10614200 |
| C | 6. 12887500  | -2. 66975000 | -2. 22354500 |
| C | 5. 05429800  | -0. 58668000 | -2. 98263300 |
| C | 6. 03936100  | -3. 98779600 | -1. 86597000 |
| H | 4. 70825600  | -5. 67963700 | -1. 56009400 |
| H | 7. 09362900  | -2. 16974200 | -2. 26454600 |
| H | 6. 03368300  | -0. 11591100 | -3. 04067500 |
| H | 6. 93372700  | -4. 55065600 | -1. 61340900 |
| C | -2. 24660500 | -0. 92466400 | 3. 31945800  |
| C | -3. 27949700 | -0. 10640200 | 2. 79283800  |
| C | -1. 52545500 | -0. 50579000 | 4. 46788300  |
| C | -4. 10535700 | -0. 50109600 | 1. 69176500  |
| C | -3. 55994500 | 1. 17445600  | 3. 40399600  |
| C | -1. 84642200 | 0. 76052600  | 5. 09191200  |
| C | -5. 09446100 | 0. 31579200  | 1. 20996900  |
| H | -3. 95087200 | -1. 47249200 | 1. 23712100  |
| C | -4. 58386300 | 2. 00776900  | 2. 85329300  |
| C | -2. 84101700 | 1. 56943600  | 4. 53514400  |
| C | -5. 32905200 | 1. 59829700  | 1. 78149700  |
| H | -5. 70111600 | -0. 01906100 | 0. 37551000  |
| H | -4. 75891100 | 2. 97751800  | 3. 31326600  |
| H | -3. 07113200 | 2. 52523500  | 5. 00219900  |
| H | -6. 08964200 | 2. 24629800  | 1. 35639200  |
| C | 1. 62984200  | 1. 60277400  | -4. 10854800 |
| H | 0. 75389300  | 2. 17477700  | -4. 40246100 |
| C | 1. 48477400  | 0. 31754700  | -3. 65377600 |
| H | 0. 49708300  | -0. 12002500 | -3. 57578000 |
| C | 2. 92089000  | 2. 19998900  | -4. 20465700 |
| H | 3. 01790800  | 3. 21360300  | -4. 58476100 |
| C | 4. 03078100  | 1. 49029200  | -3. 82866300 |
| H | 5. 02303400  | 1. 92970000  | -3. 90464100 |
| C | 0. 20527700  | -0. 84437300 | 6. 16186400  |
| H | 1. 01837500  | -1. 44252500 | 6. 56234500  |
| C | -0. 13654900 | 0. 38691500  | 6. 78856800  |
| H | 0. 40125100  | 0. 70742100  | 7. 67680900  |
| C | -1. 12995600 | 1. 16712300  | 6. 26170600  |
| H | -1. 39544500 | 2. 11631500  | 6. 72174500  |
| C | -0. 46341700 | -1. 27569100 | 5. 04547100  |
| H | -0. 16603600 | -2. 20303900 | 4. 57155500  |
| N | 1. 21799400  | -0. 69011700 | 1. 53157600  |
| S | 2. 15189800  | -1. 62841300 | 2. 48591600  |
| C | 3. 66869500  | -2. 04833800 | 1. 43574000  |
| O | 1. 54998800  | -2. 92304700 | 2. 81136200  |

|   |             |             |             |
|---|-------------|-------------|-------------|
| O | 2.67073900  | -0.76036300 | 3.54816400  |
| F | 3.86606900  | -1.11803400 | 0.49427700  |
| F | 4.73345400  | -2.08867800 | 2.23945100  |
| F | 3.51147800  | -3.23592400 | 0.85900700  |
| H | -0.02132300 | 3.35769100  | 1.70935500  |
| C | 3.97044800  | 4.67357400  | 0.27003700  |
| C | 4.68885800  | 4.72955900  | -0.93850600 |
| C | 4.29434600  | 5.61525200  | 1.25587600  |
| C | 5.67496100  | 5.69042400  | -1.15421100 |
| H | 4.48292600  | 4.01212500  | -1.72766800 |
| C | 5.28509900  | 6.57754600  | 1.04484100  |
| H | 3.78464200  | 5.61178400  | 2.21283700  |
| C | 5.97909200  | 6.62316100  | -0.16161500 |
| H | 6.20682300  | 5.70805100  | -2.10191600 |
| H | 5.51104300  | 7.29079000  | 1.83299100  |
| H | 6.74822300  | 7.37244200  | -0.32701600 |
| C | 4.48501300  | 1.84077900  | 1.49198600  |
| H | 4.04864100  | 1.42641500  | 2.40028000  |
| C | 5.80927400  | 1.98915400  | 1.43152600  |
| H | 6.30497400  | 2.37821400  | 0.54498000  |
| H | 6.44908000  | 1.72225000  | 2.26846800  |

TS-1-1-3SS

l imaginary frequency

H = -5236.771551

G = -5236.963329

E(M06-2X-DCM) = -5237.924831

|   |             |             |             |
|---|-------------|-------------|-------------|
| C | 1.79921400  | 4.61312800  | -0.63520100 |
| C | 0.89036900  | 4.75973500  | 0.63635300  |
| H | 1.45459900  | 5.30119800  | 1.40444500  |
| H | 0.02772500  | 5.36998900  | 0.35119700  |
| C | 0.39543600  | 3.49917200  | 1.26932700  |
| C | 0.89870000  | 3.99126400  | -1.73722500 |
| H | 1.50117100  | 3.65352000  | -2.58662700 |
| H | 0.23140700  | 4.77090800  | -2.10489000 |
| N | 0.03688200  | 2.90179300  | -1.29242900 |
| C | -1.33723900 | 2.92170400  | -1.51344700 |
| N | -1.86658400 | 1.66477100  | -1.47250600 |
| C | -3.15839600 | 1.15492800  | -1.67719100 |
| C | -4.32750000 | 1.90812700  | -1.86041400 |
| C | -3.24412400 | -0.24965700 | -1.70126900 |
| C | -5.54119400 | 1.25187100  | -2.07298200 |
| C | -4.46286500 | -0.88111600 | -1.92106500 |
| H | -2.34991900 | -0.84347700 | -1.54284200 |

|   |             |             |             |
|---|-------------|-------------|-------------|
| C | -5.62796700 | -0.13823400 | -2.11530400 |
| H | -6.57553800 | -0.62975700 | -2.29923000 |
| C | -4.53236800 | -2.38236200 | -1.86662800 |
| C | -6.80470900 | 2.06541400  | -2.18446200 |
| F | -3.40445600 | -2.96429800 | -2.33508600 |
| F | -5.56884000 | -2.87197500 | -2.57635300 |
| F | -4.68956600 | -2.82895000 | -0.58889000 |
| F | -6.57846800 | 3.30079500  | -2.67112400 |
| F | -7.39848700 | 2.22134300  | -0.97230400 |
| F | -7.71562600 | 1.46921000  | -2.98548400 |
| S | -2.19291300 | 4.35550500  | -1.74177900 |
| H | -4.28289500 | 2.98699200  | -1.84462000 |
| C | 1.13447300  | 2.62645700  | 2.07135500  |
| H | -1.17902700 | 0.92715900  | -1.27534600 |
| H | 0.55330500  | 2.20394300  | 2.89714900  |
| H | 0.45937100  | 1.97165800  | -1.26384300 |
| H | 1.31246300  | 1.46503000  | 1.56807500  |
| O | -0.77229500 | -1.29973300 | 0.98787800  |
| O | 1.47910400  | -2.14397500 | -0.02710100 |
| P | 0.64703200  | -0.80099600 | 0.35046300  |
| O | 0.27866400  | 0.04449000  | -0.82791500 |
| C | -0.78443000 | -3.77033600 | 4.37506600  |
| C | -0.47405300 | -4.29026000 | 3.12393800  |
| C | -0.57614500 | -3.49521100 | 1.97212300  |
| C | -1.23928900 | -1.59342100 | 3.35406000  |
| C | -1.20922800 | -2.44687700 | 4.47017000  |
| C | 0.94251000  | -2.98943200 | -1.01594900 |
| C | -0.01126700 | -3.93170800 | -0.64018700 |
| C | -0.65050800 | -4.68669900 | -1.63720300 |
| C | -0.27848300 | -4.56384600 | -2.97099200 |
| C | 0.74081800  | -3.67599300 | -3.31148500 |
| C | 1.36310900  | -2.85855600 | -2.35342100 |
| H | -1.50726800 | -2.04295400 | 5.43294900  |
| H | 1.05826000  | -3.58609300 | -4.34624300 |
| C | -0.47872500 | -4.38823500 | 0.73720900  |
| C | 0.42389300  | -5.53676200 | 1.29679600  |
| H | 0.32954600  | -6.46062100 | 0.71736800  |
| H | 1.47051100  | -5.21490600 | 1.25241800  |
| H | -2.66113700 | -5.51552100 | -1.61887800 |
| H | -1.42163400 | -6.60846300 | -1.00109600 |
| C | -0.85262900 | -2.13658200 | 2.11242300  |
| H | -0.71765500 | -4.38794700 | 5.26696700  |
| H | -0.77202700 | -5.15050700 | -3.74141700 |
| C | -0.01345100 | -5.68771100 | 2.77030800  |



|   |             |             |             |
|---|-------------|-------------|-------------|
| H | -0.82862300 | -6.41701600 | 2.87587300  |
| H | 0.80168100  | -6.03069500 | 3.41736800  |
| C | -1.73311600 | -5.55534000 | -1.03911700 |
| C | -1.89439700 | -4.95758200 | 0.37339400  |
| H | -2.25349600 | -5.67841300 | 1.11381400  |
| H | -2.61272300 | -4.13220600 | 0.33533900  |
| C | 2.45239700  | -1.93395800 | -2.80371100 |
| C | 3.80302200  | -2.26760700 | -2.53974000 |
| C | 2.13884400  | -0.79656500 | -3.58613700 |
| C | 4.18320000  | -3.42994400 | -1.79562500 |
| C | 4.86031400  | -1.43003100 | -3.05945700 |
| C | 3.20606200  | 0.03168200  | -4.10163100 |
| C | 5.49998600  | -3.72983700 | -1.56376600 |
| H | 3.40766500  | -4.08187900 | -1.41009900 |
| C | 6.22184100  | -1.77688700 | -2.79229600 |
| C | 4.53396500  | -0.30664600 | -3.82524800 |
| C | 6.53681100  | -2.89188300 | -2.06373700 |
| H | 5.75890200  | -4.61700200 | -0.99242700 |
| H | 7.00398900  | -1.13347000 | -3.18865000 |
| H | 5.33392500  | 0.31380900  | -4.22498500 |
| H | 7.57515400  | -3.14557800 | -1.86862000 |
| C | -1.73614000 | -0.19229200 | 3.53370400  |
| C | -2.96730000 | 0.19780500  | 2.94660000  |
| C | -1.04202500 | 0.70450000  | 4.38618700  |
| C | -3.76507900 | -0.68346700 | 2.14863300  |
| C | -3.48357400 | 1.52855700  | 3.18213500  |
| C | -1.58858700 | 2.02125500  | 4.63845500  |
| C | -4.95385700 | -0.27528600 | 1.60283100  |
| H | -3.42438900 | -1.69872800 | 1.98299300  |
| C | -4.71556600 | 1.92277200  | 2.57164800  |
| C | -2.78226500 | 2.40101300  | 4.01863500  |
| C | -5.43255600 | 1.05104500  | 1.79843400  |
| H | -5.53134600 | -0.97163200 | 1.00412400  |
| H | -5.07200300 | 2.93588000  | 2.74220500  |
| H | -3.18558700 | 3.39439900  | 4.20611900  |
| H | -6.35591700 | 1.36611000  | 1.32198000  |
| C | 0.52245800  | 0.69005200  | -4.66245000 |
| H | -0.50775300 | 0.95510400  | -4.88399200 |
| C | 0.79347300  | -0.41590600 | -3.89969100 |
| H | -0.01994200 | -1.01725300 | -3.51247800 |
| C | 1.57865700  | 1.50236600  | -5.16825500 |
| H | 1.34459100  | 2.37164500  | -5.77695600 |
| C | 2.88066900  | 1.17954800  | -4.89243400 |
| H | 3.69683700  | 1.78704200  | -5.27677500 |

|   |             |             |             |
|---|-------------|-------------|-------------|
| C | 0.84977200  | 1.26548000  | 5.83182000  |
| H | 1.80521000  | 0.99298700  | 6.26991100  |
| C | 0.29211000  | 2.54775400  | 6.09847500  |
| H | 0.81332600  | 3.23538200  | 6.75909900  |
| C | -0.88998700 | 2.91312100  | 5.51233800  |
| H | -1.32388900 | 3.89296300  | 5.69893600  |
| C | 0.20686600  | 0.37608500  | 5.00936000  |
| H | 0.66118500  | -0.58566300 | 4.80420300  |
| N | 1.59291400  | -0.00385800 | 1.42076800  |
| S | 2.69554800  | -0.59449600 | 2.47577400  |
| C | 4.14075100  | -1.20154000 | 1.40823600  |
| O | 2.23983700  | -1.79306000 | 3.18548500  |
| O | 3.22126200  | 0.55141000  | 3.21949100  |
| F | 4.07734200  | -2.52442200 | 1.26650200  |
| F | 4.12408400  | -0.62510900 | 0.20451100  |
| F | 5.27982700  | -0.88392600 | 2.02943900  |
| H | -0.67892100 | 3.33082500  | 1.21737900  |
| H | 2.15420000  | 2.90518900  | 2.32887100  |
| C | 3.08793200  | 3.82889800  | -0.33493200 |
| C | 3.89683500  | 4.19541100  | 0.75669500  |
| C | 3.53854500  | 2.77484700  | -1.14169900 |
| C | 5.09212200  | 3.53603100  | 1.03468300  |
| H | 3.59882200  | 5.01261900  | 1.40451000  |
| C | 4.74053400  | 2.11563600  | -0.87071700 |
| H | 2.96197600  | 2.43665900  | -1.99568200 |
| C | 5.52189200  | 2.48886300  | 0.21912000  |
| H | 5.68439000  | 3.84024700  | 1.89336300  |
| H | 5.04613900  | 1.29258900  | -1.50836000 |
| H | 6.44692900  | 1.96361700  | 0.43931700  |
| C | 2.16018600  | 6.04660000  | -1.17641900 |
| H | 2.73682300  | 5.90884000  | -2.09950700 |
| H | 1.21296700  | 6.52661600  | -1.46320800 |
| C | 2.89933200  | 6.99410300  | -0.27233300 |
| H | 2.37777400  | 7.30870700  | 0.63302500  |
| C | 4.09863700  | 7.51618300  | -0.53283500 |
| H | 4.65738500  | 7.24647300  | -1.42645100 |
| H | 4.56819400  | 8.23264600  | 0.13578500  |

TS-1-2-3RR

l imaginary frequency

H = -5236.769005

G = -5236.964364

E(M06-2X-DCM) = -5237.611984

|   |            |             |            |
|---|------------|-------------|------------|
| O | 1.53413100 | -1.67464400 | 1.40915600 |
|---|------------|-------------|------------|

|   |             |             |             |
|---|-------------|-------------|-------------|
| O | 3.36407700  | -0.40888200 | 0.08387000  |
| P | 1.75961900  | -0.58671600 | 0.23259500  |
| O | 1.21782500  | 0.79947100  | 0.59721900  |
| N | 1.21753000  | -1.25977400 | -1.11888800 |
| S | -0.33013700 | -1.36659000 | -1.45451500 |
| C | -0.54158900 | -3.19096200 | -1.78950300 |
| F | -1.82906000 | -3.43118300 | -2.05504100 |
| F | -0.17238900 | -3.89980800 | -0.72188600 |
| F | 0.19813300  | -3.56421200 | -2.84018500 |
| C | -0.49214600 | 4.49143000  | 0.04103400  |
| C | -0.67515900 | 4.04040200  | -1.45455100 |
| H | -0.13875900 | 4.75972800  | -2.08782800 |
| H | -1.73806200 | 4.10546100  | -1.69855900 |
| C | -0.17136000 | 2.68115000  | -1.80361800 |
| C | -1.22806700 | 3.45241700  | 0.96625800  |
| H | -0.58605300 | 3.11418600  | 1.77480000  |
| H | -2.08037000 | 3.94678000  | 1.43073400  |
| N | -1.72274300 | 2.24045300  | 0.30327800  |
| C | -3.05527800 | 2.07551900  | -0.04805900 |
| N | -3.35029800 | 0.77772500  | -0.34801300 |
| C | -4.55692700 | 0.12650100  | -0.67529800 |
| C | -5.74782400 | 0.75281200  | -1.06938100 |
| C | -4.51978300 | -1.27792500 | -0.59976400 |
| C | -6.87173300 | -0.02413300 | -1.35900800 |
| C | -5.65447300 | -2.03052600 | -0.88342800 |
| H | -3.60010200 | -1.77654800 | -0.31489400 |
| C | -6.84645100 | -1.41362700 | -1.26490000 |
| H | -7.72981200 | -2.00075000 | -1.48321200 |
| C | -5.60541000 | -3.52267400 | -0.69175200 |
| C | -8.12165500 | 0.66215900  | -1.84811800 |
| F | -4.40088100 | -4.03931500 | -1.01292900 |
| F | -5.83868800 | -3.86245500 | 0.60603600  |
| F | -6.53642900 | -4.16119400 | -1.43112600 |
| F | -9.23161500 | -0.05735800 | -1.56619500 |
| F | -8.27807800 | 1.88316300  | -1.29557800 |
| F | -8.09817000 | 0.83691600  | -3.19026900 |
| S | -4.12650700 | 3.37465400  | -0.11216800 |
| H | -5.79816900 | 1.82920700  | -1.13546600 |
| C | 1.13456000  | 2.22266200  | -1.67148300 |
| H | -2.56666000 | 0.11968700  | -0.28652200 |
| H | 1.92918800  | 2.94333900  | -1.48832200 |
| H | 1.39736400  | 1.36649700  | -2.29652300 |
| O | -1.21172100 | -1.11649600 | -0.27787900 |
| H | -1.21655400 | 1.39210900  | 0.54999100  |

|   |             |             |             |
|---|-------------|-------------|-------------|
| O | -0.69373500 | -0.68152300 | -2.70178500 |
| H | 1.09457200  | 1.59107600  | -0.53744900 |
| C | 5.42064600  | -3.74731800 | -1.38348700 |
| C | 5.06590300  | -3.67421100 | -0.04092700 |
| C | 4.47261300  | -2.51325800 | 0.48165500  |
| C | 4.52055300  | -1.50159300 | -1.74388100 |
| C | 5.18398100  | -2.64838200 | -2.20988200 |
| C | 2.07563900  | -1.54892600 | 2.69273400  |
| C | 3.40901200  | -1.89646500 | 2.90011800  |
| C | 3.97728400  | -1.67156600 | 4.16450100  |
| C | 3.19535100  | -1.23146000 | 5.22708100  |
| C | 1.83590500  | -1.00208700 | 5.02026100  |
| C | 1.24518200  | -1.13116600 | 3.75090700  |
| H | 5.49308200  | -2.67687400 | -3.25046000 |
| H | 1.20780100  | -0.69452900 | 5.85071700  |
| C | 4.42149600  | -2.60755800 | 2.00444600  |
| C | 4.33941100  | -4.16191200 | 2.17851500  |
| H | 3.29877000  | -4.47737300 | 2.04135000  |
| H | 4.65889300  | -4.48844200 | 3.17280600  |
| H | 5.67916100  | -2.91821600 | 4.66703000  |
| H | 6.05256400  | -1.19860200 | 4.63984400  |
| C | 4.12815600  | -1.48603600 | -0.39221100 |
| H | 5.88670800  | -4.64258600 | -1.78705600 |
| H | 3.63091700  | -1.07800600 | 6.21118200  |
| C | 5.21216800  | -4.72703900 | 1.03639000  |
| H | 4.87919400  | -5.71571100 | 0.70095900  |
| H | 6.25989500  | -4.83754800 | 1.34880800  |
| C | 5.45893700  | -1.97622500 | 4.14578600  |
| C | 5.75715600  | -2.08447200 | 2.63560400  |
| H | 5.97280300  | -1.08998700 | 2.22792400  |
| H | 6.60905100  | -2.73093300 | 2.40469900  |
| C | -0.21333000 | -0.85006600 | 3.58087400  |
| C | -0.72016000 | 0.43796700  | 3.89235800  |
| C | -1.09694600 | -1.88327400 | 3.17659200  |
| C | 0.11398300  | 1.53633400  | 4.28671000  |
| C | -2.14276800 | 0.68509800  | 3.80832400  |
| C | -2.50937300 | -1.60477300 | 3.04812500  |
| C | -0.41721700 | 2.75513000  | 4.62596200  |
| H | 1.18796100  | 1.39428400  | 4.31674800  |
| C | -2.65542200 | 1.97202300  | 4.16724700  |
| C | -2.99372500 | -0.33550700 | 3.37511700  |
| C | -1.82299900 | 2.97798000  | 4.57775800  |
| H | 0.24223800  | 3.56513300  | 4.92642100  |
| H | -3.72862000 | 2.13273600  | 4.10157500  |

|   |             |             |             |
|---|-------------|-------------|-------------|
| H | -4.06064800 | -0.13795800 | 3.29577100  |
| H | -2.22467200 | 3.95096500  | 4.84549800  |
| C | 4.30486500  | -0.34446300 | -2.66817200 |
| C | 3.46628400  | -0.48379300 | -3.80188400 |
| C | 5.01563100  | 0.86367100  | -2.45050100 |
| C | 2.69969500  | -1.66553600 | -4.06243700 |
| C | 3.34672600  | 0.61103300  | -4.73997900 |
| C | 4.86597200  | 1.95742400  | -3.38412100 |
| C | 1.90400700  | -1.76797400 | -5.17275100 |
| H | 2.72669600  | -2.47544000 | -3.34474200 |
| C | 2.51295100  | 0.45757400  | -5.89229400 |
| C | 4.04214000  | 1.79940400  | -4.50221100 |
| C | 1.81547400  | -0.69908600 | -6.10907000 |
| H | 1.31554000  | -2.66701800 | -5.33008700 |
| H | 2.44412800  | 1.28811900  | -6.59104400 |
| H | 3.94539400  | 2.62086600  | -5.20961900 |
| H | 1.18063000  | -0.80211100 | -6.98477200 |
| C | -1.54003300 | -4.18229700 | 2.47297800  |
| H | -1.17772500 | -5.18491600 | 2.26258900  |
| C | -0.66393000 | -3.21984600 | 2.90140600  |
| H | 0.38097700  | -3.47284500 | 3.03716900  |
| C | -2.92172800 | -3.88750800 | 2.29983600  |
| H | -3.60119200 | -4.65143100 | 1.93512900  |
| C | -3.39066000 | -2.63633900 | 2.59510000  |
| H | -4.44577700 | -2.40393200 | 2.47996100  |
| C | 6.58628000  | 2.23558400  | -1.17208600 |
| H | 7.26385100  | 2.34765900  | -0.32974700 |
| C | 6.41401900  | 3.31756100  | -2.08107500 |
| H | 6.95469700  | 4.24676900  | -1.92269500 |
| C | 5.58007600  | 3.17567400  | -3.15672100 |
| H | 5.44894000  | 3.98754000  | -3.86846500 |
| C | 5.91450300  | 1.05466800  | -1.35172800 |
| H | 6.07120700  | 0.23953500  | -0.65461600 |
| C | -1.24007500 | 5.86467100  | 0.17891400  |
| H | -0.83026000 | 6.56546700  | -0.56071100 |
| H | -2.29123200 | 5.70096400  | -0.07890400 |
| H | -0.88617200 | 1.98405900  | -2.23914800 |
| C | -1.14498600 | 6.48618700  | 1.54657800  |
| H | -0.14372400 | 6.74106200  | 1.89339600  |
| C | -2.19341500 | 6.74569400  | 2.33080500  |
| H | -3.20993300 | 6.50768100  | 2.02473300  |
| H | -2.07431100 | 7.21443300  | 3.30452100  |
| C | 1.00837000  | 4.70125700  | 0.35759800  |
| C | 1.71987900  | 5.67864800  | -0.36678000 |

|   |             |             |              |
|---|-------------|-------------|--------------|
| C | 1. 72388100 | 3. 98102200 | 1. 32405500  |
| C | 3. 07298400 | 5. 92063200 | -0. 14322400 |
| H | 1. 21387100 | 6. 26664200 | -1. 12771000 |
| C | 3. 08294300 | 4. 22044600 | 1. 55164400  |
| H | 1. 25242800 | 3. 19768800 | 1. 90322400  |
| C | 3. 76638400 | 5. 18914600 | 0. 82314100  |
| H | 3. 58512200 | 6. 68082100 | -0. 72725800 |
| H | 3. 60427500 | 3. 63068700 | 2. 30068200  |
| H | 4. 82320900 | 5. 36970200 | 0. 99808000  |

TS-1-2-3SR

l imaginary frequency

H = -5236. 765193

G = -5236. 959972

E(M06-2X-DCM) = -5237. 611281

|   |              |              |              |
|---|--------------|--------------|--------------|
| O | -2. 22130500 | 0. 47206400  | 1. 73775100  |
| O | -3. 31195200 | -1. 03113300 | -0. 08071700 |
| P | -2. 00518600 | -0. 12301900 | 0. 24502100  |
| O | -1. 93227100 | 1. 11798700  | -0. 64119700 |
| N | -0. 72004300 | -1. 08785600 | 0. 29705600  |
| S | -0. 24999400 | -2. 08809700 | -0. 85599100 |
| C | -0. 85033400 | -3. 76881500 | -0. 29234700 |
| F | -0. 49955700 | -4. 68173800 | -1. 19948300 |
| F | -0. 30072400 | -4. 09182300 | 0. 88459400  |
| F | -2. 17898600 | -3. 76219300 | -0. 16185500 |
| C | 0. 94857100  | 3. 79318900  | -1. 01123900 |
| C | 1. 31780800  | 3. 08552100  | -2. 37300100 |
| H | 0. 92721300  | 3. 71264700  | -3. 18363300 |
| H | 2. 40670500  | 3. 06107100  | -2. 44790800 |
| C | 0. 79279400  | 1. 70528400  | -2. 59311700 |
| C | 1. 16828400  | 2. 78203000  | 0. 18158500  |
| H | 0. 21491100  | 2. 61121800  | 0. 68425500  |
| H | 1. 86111300  | 3. 20437500  | 0. 90745500  |
| N | 1. 66612300  | 1. 45735900  | -0. 20343500 |
| C | 3. 02424000  | 1. 16795400  | -0. 28961900 |
| N | 3. 25150400  | -0. 15803500 | -0. 53230500 |
| C | 4. 46347400  | -0. 87277900 | -0. 65819700 |
| C | 5. 66437100  | -0. 32612700 | -1. 12979000 |
| C | 4. 41314100  | -2. 23857100 | -0. 33833600 |
| C | 6. 79500400  | -1. 13771700 | -1. 24063600 |
| C | 5. 55348200  | -3. 02906400 | -0. 45036700 |
| H | 3. 47900700  | -2. 67664500 | -0. 00713300 |
| C | 6. 75882700  | -2. 48761400 | -0. 89725900 |
| H | 7. 64245300  | -3. 10677300 | -0. 99102600 |

|   |             |             |             |
|---|-------------|-------------|-------------|
| C | 5.49362300  | -4.46389500 | -0.00090700 |
| C | 8.09190700  | -0.52058100 | -1.69685100 |
| F | 6.43557600  | -5.22353000 | -0.59864700 |
| F | 4.29299600  | -5.02605200 | -0.25061200 |
| F | 5.70068500  | -4.56961800 | 1.33953400  |
| F | 8.90401000  | -1.43253000 | -2.27774300 |
| F | 8.77969000  | 0.01536000  | -0.66271500 |
| F | 7.89083500  | 0.47132700  | -2.59143600 |
| S | 4.19136500  | 2.36525300  | -0.15502600 |
| H | 5.71625000  | 0.71611200  | -1.40647200 |
| C | -0.52824500 | 1.36139300  | -2.86416700 |
| H | 2.43475800  | -0.77717600 | -0.52689500 |
| H | -1.19862800 | 2.15220300  | -3.20397600 |
| H | -0.69872200 | 0.37707200  | -3.30094700 |
| O | 1.22264300  | -2.20517000 | -0.80368900 |
| H | 1.06644800  | 0.68208200  | 0.07862000  |
| O | -0.87150300 | -1.86870900 | -2.17038600 |
| H | -1.09089500 | 1.17181400  | -1.71552500 |
| C | -6.99889300 | 0.96020700  | -0.25025700 |
| C | -6.45913900 | 0.56895000  | 0.97005700  |
| C | -5.26812800 | -0.17216100 | 1.01937900  |
| C | -5.09713800 | -0.05208300 | -1.41538100 |
| C | -6.33389000 | 0.61682200  | -1.42661600 |
| C | -2.40490500 | -0.39204200 | 2.83146900  |
| C | -3.65874700 | -0.96466600 | 3.04615800  |
| C | -3.79776600 | -1.93745900 | 4.05014600  |
| C | -2.73954900 | -2.24129700 | 4.89848600  |
| C | -1.53137400 | -1.56616200 | 4.73985900  |
| C | -1.32500100 | -0.64301500 | 3.69992100  |
| H | -6.75945900 | 0.89142000  | -2.38705400 |
| H | -0.70698500 | -1.76636800 | 5.41725200  |
| C | -5.02896300 | -0.66639100 | 2.44092000  |
| C | -5.77022000 | 0.45246600  | 3.24911700  |
| H | -6.05194700 | 0.12442700  | 4.25414800  |
| H | -5.10005400 | 1.31344400  | 3.35461300  |
| H | -5.16965500 | -3.63070600 | 4.10240900  |
| H | -5.79147300 | -2.17424300 | 4.87054900  |
| C | -4.56980800 | -0.41115000 | -0.16082500 |
| H | -7.92918600 | 1.52085200  | -0.29333400 |
| H | -2.85086300 | -2.98610900 | 5.68231700  |
| C | -6.97765500 | 0.83561500  | 2.36623000  |
| H | -7.85387600 | 0.21219000  | 2.59230200  |
| H | -7.28962500 | 1.87695400  | 2.50507200  |
| C | -5.18615200 | -2.53748300 | 4.02834300  |

|   |             |             |             |
|---|-------------|-------------|-------------|
| C | -5.74202100 | -2.04029900 | 2.67814900  |
| H | -6.83256000 | -1.95277800 | 2.66006400  |
| H | -5.44858100 | -2.73101500 | 1.87931100  |
| C | 0.00360800  | 0.03934800  | 3.60977200  |
| C | 0.10779100  | 1.42524600  | 3.88900100  |
| C | 1.17184100  | -0.73036400 | 3.38039000  |
| C | -1.02386600 | 2.24855700  | 4.19528600  |
| C | 1.41133700  | 2.05137500  | 3.91120300  |
| C | 2.46981100  | -0.09656400 | 3.44261000  |
| C | -0.88472700 | 3.58419200  | 4.46918800  |
| H | -2.00912400 | 1.79723600  | 4.22172400  |
| C | 1.51188900  | 3.45147600  | 4.18988900  |
| C | 2.55339200  | 1.27631700  | 3.69127000  |
| C | 0.39859000  | 4.20145100  | 4.45858800  |
| H | -1.76221400 | 4.18055900  | 4.70458900  |
| H | 2.50140000  | 3.90241900  | 4.19653400  |
| H | 3.53142800  | 1.75110700  | 3.72104200  |
| H | 0.48878800  | 5.26174100  | 4.67856200  |
| C | -4.42310600 | -0.36195000 | -2.71311900 |
| C | -4.26028800 | -1.70773100 | -3.12609700 |
| C | -4.02728100 | 0.69859000  | -3.56718100 |
| C | -4.68354400 | -2.82284300 | -2.33461700 |
| C | -3.66922600 | -1.99182800 | -4.41380000 |
| C | -3.47158700 | 0.39745200  | -4.86784800 |
| C | -4.50353700 | -4.11191200 | -2.76228100 |
| H | -5.16133300 | -2.63884300 | -1.37942400 |
| C | -3.49461600 | -3.35113600 | -4.82083700 |
| C | -3.29918600 | -0.93563300 | -5.24985000 |
| C | -3.89356300 | -4.38511800 | -4.01911800 |
| H | -4.83221500 | -4.93798300 | -2.13746700 |
| H | -3.03673900 | -3.54284100 | -5.78818700 |
| H | -2.87136000 | -1.15690500 | -6.22557200 |
| H | -3.75405100 | -5.41426900 | -4.33808800 |
| C | 2.28395800  | -2.85251300 | 2.90003100  |
| H | 2.22245000  | -3.91004300 | 2.65830900  |
| C | 1.13322100  | -2.12947300 | 3.07668100  |
| H | 0.17247200  | -2.61409300 | 2.96127000  |
| C | 3.56168500  | -2.23167200 | 3.00420400  |
| H | 4.45836100  | -2.82443500 | 2.85187900  |
| C | 3.64628100  | -0.88824800 | 3.25358200  |
| H | 4.61245300  | -0.39305100 | 3.30875500  |
| C | -3.77320900 | 3.08198700  | -4.06490900 |
| H | -3.87307300 | 4.12000800  | -3.75857600 |
| C | -3.25928000 | 2.77778400  | -5.35857300 |



|   |             |            |             |
|---|-------------|------------|-------------|
| H | -2.98425800 | 3.58380900 | -6.03357600 |
| C | -3.10541400 | 1.47165700 | -5.73911700 |
| H | -2.70111500 | 1.22303000 | -6.71763300 |
| C | -4.13646800 | 2.08053600 | -3.20047800 |
| H | -4.50250300 | 2.33267700 | -2.21247400 |
| C | -0.56305600 | 4.22844800 | -1.07239400 |
| H | -0.67453900 | 4.87150300 | -1.95726500 |
| H | -1.18365000 | 3.34397500 | -1.22681200 |
| C | -1.09595000 | 4.96440200 | 0.12893000  |
| C | -2.01698900 | 4.46915400 | 0.95885000  |
| H | -2.38447800 | 5.04439000 | 1.80466700  |
| H | -2.43122400 | 3.47239800 | 0.82686600  |
| C | 1.79910500  | 5.07254600 | -0.85818500 |
| C | 2.32986900  | 5.75325100 | -1.96431300 |
| C | 1.99122800  | 5.65580600 | 0.40675300  |
| C | 3.03972400  | 6.94653400 | -1.81657600 |
| H | 2.20859900  | 5.35772000 | -2.96711700 |
| C | 2.69779700  | 6.84843600 | 0.55801900  |
| H | 1.58016900  | 5.18508700 | 1.29395800  |
| C | 3.23091300  | 7.50122800 | -0.55319100 |
| H | 3.44553100  | 7.43770600 | -2.69716800 |
| H | 2.83238100  | 7.26517200 | 1.55285300  |
| H | 3.78629600  | 8.42763500 | -0.43545200 |
| H | -0.70573300 | 5.96596500 | 0.30041900  |
| H | 1.52956900  | 0.90655700 | -2.62416300 |

TS-1-2-3SS

l imaginary frequency

H = -5236.765781

G = -5236.961573

E(M06-2X-DCM) = -5237.610270

|   |             |             |             |
|---|-------------|-------------|-------------|
| O | -2.03852800 | 0.30917300  | 1.87183700  |
| O | -3.00462300 | -1.32717700 | 0.10079700  |
| P | -1.83876300 | -0.21874300 | 0.35002900  |
| O | -2.01289200 | 1.02504600  | -0.50291100 |
| N | -0.41879800 | -0.98693900 | 0.29714200  |
| S | 0.07494400  | -1.92075300 | -0.89870000 |
| C | -0.24407100 | -3.66846200 | -0.30791900 |
| F | 0.14014300  | -4.52470900 | -1.25628700 |
| F | 0.45421200  | -3.91365600 | 0.80783400  |
| F | -1.54184200 | -3.84479700 | -0.05235900 |
| C | 0.63445800  | 3.97405400  | -1.11203900 |
| C | 1.05523500  | 3.28849700  | -2.46816900 |
| H | 0.68902200  | 3.90626800  | -3.29616300 |

|   |             |             |             |
|---|-------------|-------------|-------------|
| H | 2.14629700  | 3.29137300  | -2.51097000 |
| C | 0.55876500  | 1.90162600  | -2.68165200 |
| C | 1.00733500  | 2.99041100  | 0.06366600  |
| H | 0.10713200  | 2.66021800  | 0.57631400  |
| H | 1.63414400  | 3.51168800  | 0.78902800  |
| N | 1.66596000  | 1.74223300  | -0.34618600 |
| C | 3.04559700  | 1.58976900  | -0.43618100 |
| N | 3.39803900  | 0.29806900  | -0.69415000 |
| C | 4.67159800  | -0.29880100 | -0.82757300 |
| C | 5.80697700  | 0.35370200  | -1.32459100 |
| C | 4.75462200  | -1.65899300 | -0.49189100 |
| C | 7.00788600  | -0.34815400 | -1.44540800 |
| C | 5.96283200  | -2.33932900 | -0.61443500 |
| H | 3.87093800  | -2.17787800 | -0.13914400 |
| C | 7.10418700  | -1.69122500 | -1.08718600 |
| H | 8.04091400  | -2.22530800 | -1.18917200 |
| C | 6.04971500  | -3.76738700 | -0.14755800 |
| C | 8.23307600  | 0.38328200  | -1.92992400 |
| F | 6.32176000  | -3.83459600 | 1.18348200  |
| F | 7.03041200  | -4.44814900 | -0.77730600 |
| F | 4.89499000  | -4.43737800 | -0.33969300 |
| F | 8.88190600  | 0.99621400  | -0.91360000 |
| F | 7.92413900  | 1.33992300  | -2.83253200 |
| F | 9.11929600  | -0.45450600 | -2.51340600 |
| S | 4.11089300  | 2.87944400  | -0.27276000 |
| C | 1.49525000  | 5.28745700  | -1.01652900 |
| H | 2.55140600  | 5.00844900  | -1.04576000 |
| H | 1.28143900  | 5.88631100  | -1.91333100 |
| H | 5.75546500  | 1.39224900  | -1.61504100 |
| C | -0.78045100 | 1.52470100  | -2.80806000 |
| H | 2.64076900  | -0.39440300 | -0.70413600 |
| H | -1.49912600 | 2.31111700  | -3.04326400 |
| H | -0.96015300 | 0.55884800  | -3.28305000 |
| O | 1.55222800  | -1.85547600 | -0.96977500 |
| H | 1.15801000  | 0.90189900  | -0.06726100 |
| O | -0.66748600 | -1.77985300 | -2.16023700 |
| H | -1.20668800 | 1.25908300  | -1.66235400 |
| C | -6.93344300 | 0.13205900  | 0.09899900  |
| C | -6.28442800 | -0.15551600 | 1.29488900  |
| C | -5.00582200 | -0.73392800 | 1.29121300  |
| C | -4.98264200 | -0.66346900 | -1.15043000 |
| C | -6.29479200 | -0.16032900 | -1.10578100 |
| C | -2.05270300 | -0.57674100 | 2.95818500  |
| C | -3.21299200 | -1.29842100 | 3.23841500  |

|   |             |             |             |
|---|-------------|-------------|-------------|
| C | -3.17791900 | -2.27542700 | 4.24703400  |
| C | -2.04595800 | -2.44443400 | 5.03598000  |
| C | -0.93912000 | -1.62836000 | 4.81318600  |
| C | -0.90527300 | -0.69028400 | 3.76668400  |
| H | -6.80572000 | 0.02344800  | -2.04610300 |
| H | -0.06164900 | -1.72281200 | 5.44539100  |
| C | -4.63764100 | -1.17405400 | 2.70295000  |
| C | -5.47212100 | -0.14501200 | 3.53807500  |
| H | -5.66157600 | -0.49093900 | 4.55874300  |
| H | -4.91040600 | 0.79408900  | 3.60262800  |
| H | -4.33272400 | -4.12018000 | 4.37832300  |
| H | -5.08199800 | -2.74064000 | 5.17448700  |
| C | -4.34174100 | -0.90331200 | 0.07950700  |
| H | -7.92964400 | 0.56724000  | 0.09667700  |
| H | -2.02363600 | -3.19287100 | 5.82396400  |
| C | -6.76035200 | 0.07168500  | 2.71352300  |
| H | -7.54144900 | -0.64895300 | 2.99297700  |
| H | -7.19016600 | 1.06980900  | 2.85592700  |
| C | -4.48330300 | -3.03737600 | 4.30191600  |
| C | -5.16554200 | -2.62239100 | 2.98244900  |
| H | -6.25808000 | -2.66762900 | 3.02209100  |
| H | -4.83297700 | -3.27982900 | 2.17093100  |
| C | 0.31680800  | 0.15642300  | 3.60589700  |
| C | 0.24838500  | 1.55273600  | 3.84386000  |
| C | 1.56578600  | -0.45939700 | 3.34022700  |
| C | -0.97116800 | 2.23388500  | 4.16259800  |
| C | 1.45862200  | 2.34331700  | 3.80005300  |
| C | 2.77161900  | 0.33825100  | 3.34193700  |
| C | -1.00024900 | 3.58722800  | 4.38102800  |
| H | -1.88755000 | 1.66085300  | 4.24212500  |
| C | 1.38374700  | 3.75383100  | 4.02776700  |
| C | 2.68445800  | 1.71598400  | 3.55955500  |
| C | 0.19065000  | 4.36424000  | 4.30458700  |
| H | -1.94122800 | 4.07372000  | 4.62457900  |
| H | 2.30379200  | 4.33053900  | 3.97669300  |
| H | 3.59275300  | 2.31383700  | 3.54251400  |
| H | 0.14751800  | 5.43625200  | 4.47574500  |
| C | -4.35428800 | -0.95262400 | -2.47589400 |
| C | -4.05555100 | -2.28969500 | -2.84004600 |
| C | -4.14808300 | 0.10034800  | -3.40211500 |
| C | -4.28782300 | -3.40529400 | -1.97373500 |
| C | -3.51925100 | -2.56846500 | -4.15260700 |
| C | -3.64755000 | -0.20061100 | -4.72532700 |
| C | -3.98067400 | -4.68455100 | -2.35653600 |

|   |              |              |              |
|---|--------------|--------------|--------------|
| H | -4. 72137600 | -3. 23062800 | -0. 99599700 |
| C | -3. 20696800 | -3. 91659800 | -4. 51145700 |
| C | -3. 33735100 | -1. 52135200 | -5. 05895000 |
| C | -3. 42425600 | -4. 94824600 | -3. 63982200 |
| H | -4. 16562600 | -5. 51023800 | -1. 67466400 |
| H | -2. 79275300 | -4. 10200900 | -5. 49955400 |
| H | -2. 95119200 | -1. 74119400 | -6. 05225400 |
| H | -3. 18149700 | -5. 96870600 | -3. 92300200 |
| C | 2. 92578700  | -2. 42752100 | 2. 84042900  |
| H | 2. 99449200  | -3. 48746200 | 2. 61104600  |
| C | 1. 69792700  | -1. 85648900 | 3. 05190800  |
| H | 0. 80439100  | -2. 46255200 | 2. 97479600  |
| C | 4. 11525600  | -1. 64543400 | 2. 89232200  |
| H | 5. 07511600  | -2. 12073000 | 2. 71585000  |
| C | 4. 03371900  | -0. 29839000 | 3. 12143900  |
| H | 4. 92867700  | 0. 31859600  | 3. 13350200  |
| C | -4. 22918000 | 2. 46544900  | -4. 02416000 |
| H | -4. 42525600 | 3. 49881000  | -3. 75286100 |
| C | -3. 77261300 | 2. 15665900  | -5. 33778900 |
| H | -3. 64804600 | 2. 95263700  | -6. 06727400 |
| C | -3. 48017700 | 0. 86123800  | -5. 66948100 |
| H | -3. 11534800 | 0. 61108000  | -6. 66308100 |
| C | -4. 40243800 | 1. 47620100  | -3. 08997800 |
| H | -4. 71870200 | 1. 73654100  | -2. 08700400 |
| C | -0. 85101400 | 4. 40863500  | -1. 11276900 |
| C | -1. 36492600 | 5. 11247900  | -2. 21874700 |
| C | -1. 70232100 | 4. 25423900  | -0. 00830700 |
| C | -2. 66640900 | 5. 61040800  | -2. 23569500 |
| H | -0. 74042600 | 5. 29560800  | -3. 08892800 |
| C | -3. 00864800 | 4. 75079000  | -0. 02066000 |
| H | -1. 36837700 | 3. 75506500  | 0. 89292300  |
| C | -3. 50210200 | 5. 42791700  | -1. 13250700 |
| H | -3. 02192200 | 6. 14881900  | -3. 11056300 |
| H | -3. 63704400 | 4. 60281900  | 0. 85321600  |
| H | -4. 51711600 | 5. 81572200  | -1. 13878400 |
| C | 1. 23331500  | 6. 12866100  | 0. 20332300  |
| C | 2. 15459600  | 6. 41671100  | 1. 12521300  |
| H | 3. 17070900  | 6. 03476900  | 1. 05668300  |
| H | 1. 92619300  | 7. 05010000  | 1. 97874700  |
| H | 0. 22656400  | 6. 53010300  | 0. 31272500  |
| H | 1. 31150200  | 1. 12591800  | -2. 80795900 |

INT-13

0 imaginary frequency

H = -5315.396272

G = -5315.600145

E(M06-2X-DCM) = -5316.278567

E(M06-2X-cyclohexane) = -5316.253995

|   |             |             |             |
|---|-------------|-------------|-------------|
| C | -2.94506900 | 3.94204900  | -0.54302300 |
| C | -3.96102900 | 3.43762400  | 0.52439000  |
| H | -3.60520700 | 2.46605300  | 0.89403400  |
| H | -3.94699500 | 4.12349600  | 1.37875400  |
| C | -5.38362700 | 3.27944900  | 0.05210200  |
| C | -2.88509700 | 2.94353700  | -1.73670300 |
| H | -2.19132000 | 3.31961700  | -2.49920600 |
| H | -3.86451100 | 2.86042500  | -2.20800900 |
| N | -2.47947800 | 1.60102700  | -1.35230000 |
| C | -3.11177700 | 0.45449400  | -1.71340200 |
| N | -2.41651800 | -0.66438400 | -1.30029500 |
| C | -2.75167900 | -2.02321200 | -1.36910800 |
| C | -4.06834300 | -2.51225700 | -1.35266200 |
| C | -1.69016500 | -2.94119300 | -1.38355800 |
| C | -4.29676000 | -3.88630000 | -1.38135200 |
| C | -1.94029200 | -4.31236300 | -1.40370700 |
| H | -0.66698500 | -2.57981800 | -1.37366200 |
| C | -3.24460500 | -4.80221700 | -1.41579300 |
| H | -3.43765300 | -5.86752700 | -1.45019500 |
| C | -0.78804800 | -5.27188800 | -1.32743900 |
| C | -5.70751100 | -4.40279100 | -1.27388300 |
| F | 0.31191900  | -4.80521500 | -1.96589200 |
| F | -1.08230900 | -6.47630200 | -1.85569400 |
| F | -0.41096300 | -5.49616200 | -0.03566100 |
| F | -6.61479700 | -3.52717400 | -1.74411300 |
| F | -6.03971300 | -4.65838600 | 0.02074200  |
| F | -5.86878300 | -5.56446200 | -1.94598300 |
| S | -4.55376900 | 0.41468200  | -2.59515300 |
| H | -4.89815100 | -1.82171200 | -1.32531200 |
| C | -6.42935900 | 3.92979100  | 0.57311800  |
| H | -1.46735200 | -0.48443100 | -0.97106700 |
| H | -1.55298600 | 1.51353100  | -0.94066300 |
| H | 1.13440800  | 1.93373400  | 1.53342800  |
| O | 0.94183700  | -1.41280300 | 1.03517500  |
| O | 2.81146500  | -0.26915100 | -0.33785100 |
| P | 1.36672000  | -0.02922200 | 0.32945400  |
| O | 0.23962400  | 0.42772100  | -0.51998000 |
| C | 3.22726600  | -2.83390600 | 4.23831700  |
| C | 3.67686200  | -2.99631800 | 2.93294000  |
| C | 2.86411200  | -2.63656300 | 1.84583000  |

|   |              |              |              |
|---|--------------|--------------|--------------|
| C | 1. 15890300  | -1. 82981300 | 3. 40754600  |
| C | 1. 95821100  | -2. 29756300 | 4. 46256400  |
| C | 2. 99695800  | -1. 30027900 | -1. 28820300 |
| C | 3. 22774400  | -2. 59853900 | -0. 83947400 |
| C | 3. 31361800  | -3. 62636100 | -1. 79507900 |
| C | 3. 25229400  | -3. 34703500 | -3. 15549300 |
| C | 3. 09621900  | -2. 02672300 | -3. 57439900 |
| C | 2. 95053300  | -0. 97449600 | -2. 65679900 |
| H | 1. 58002500  | -2. 20484500 | 5. 47623100  |
| H | 3. 06282000  | -1. 79200400 | -4. 63411200 |
| C | 3. 48350300  | -3. 16788400 | 0. 55583000  |
| C | 4. 99740400  | -3. 12389900 | 0. 94653200  |
| H | 5. 60883600  | -3. 78170900 | 0. 32103000  |
| H | 5. 36481900  | -2. 09876800 | 0. 82397800  |
| H | 2. 79706000  | -5. 72713500 | -1. 58259500 |
| H | 4. 47512900  | -5. 34937900 | -1. 18851100 |
| C | 1. 67108800  | -1. 97371000 | 2. 10442400  |
| H | 3. 85097600  | -3. 12441300 | 5. 07973100  |
| H | 3. 32069900  | -4. 14745500 | -3. 88739100 |
| C | 5. 01526800  | -3. 50853100 | 2. 44431800  |
| H | 5. 10755000  | -4. 59471300 | 2. 58037800  |
| H | 5. 85146500  | -3. 05064100 | 2. 98407400  |
| C | 3. 44460700  | -4. 97336800 | -1. 12396400 |
| C | 3. 04413900  | -4. 65713900 | 0. 32974300  |
| H | 3. 49154300  | -5. 33498000 | 1. 06217600  |
| H | 1. 95693100  | -4. 72915900 | 0. 42904100  |
| C | 2. 78132300  | 0. 42449700  | -3. 16698600 |
| C | 3. 88894700  | 1. 30622600  | -3. 15951300 |
| C | 1. 54877400  | 0. 82912600  | -3. 73191800 |
| C | 5. 18541500  | 0. 91993900  | -2. 69140400 |
| C | 3. 73568000  | 2. 64742700  | -3. 67563000 |
| C | 1. 41341700  | 2. 16996200  | -4. 25673100 |
| C | 6. 24048600  | 1. 79498100  | -2. 70765100 |
| H | 5. 32983100  | -0. 08997100 | -2. 32333200 |
| C | 4. 85755700  | 3. 53380900  | -3. 66015200 |
| C | 2. 50210400  | 3. 04378000  | -4. 20006300 |
| C | 6. 07637700  | 3. 12457100  | -3. 18986200 |
| H | 7. 21482900  | 1. 47254200  | -2. 35038400 |
| H | 4. 72149200  | 4. 54198900  | -4. 04460700 |
| H | 2. 39341600  | 4. 05233200  | -4. 59446400 |
| H | 6. 92306100  | 3. 80551600  | -3. 19091500 |
| C | -0. 19219300 | -1. 24224700 | 3. 67365200  |
| C | -1. 35118600 | -1. 94303800 | 3. 25311500  |
| C | -0. 31598700 | -0. 02066500 | 4. 38135300  |

|   |             |             |             |
|---|-------------|-------------|-------------|
| C | -1.29860100 | -3.21217900 | 2.59286900  |
| C | -2.65827100 | -1.38171700 | 3.51112100  |
| C | -1.63166300 | 0.52302600  | 4.63993500  |
| C | -2.43965500 | -3.85887100 | 2.19600600  |
| H | -0.33519300 | -3.67331200 | 2.40800500  |
| C | -3.82323100 | -2.08254900 | 3.06692200  |
| C | -2.76156700 | -0.16564200 | 4.19157000  |
| C | -3.72290600 | -3.28511700 | 2.42148800  |
| H | -2.36078700 | -4.81636500 | 1.69143300  |
| H | -4.79527900 | -1.63252300 | 3.25393400  |
| H | -3.74801300 | 0.25207400  | 4.38285200  |
| H | -4.61067800 | -3.79874600 | 2.06542200  |
| C | -0.76280900 | 0.38272100  | -4.39133300 |
| H | -1.61394000 | -0.28963900 | -4.44414100 |
| C | 0.41071900  | -0.03641900 | -3.82151600 |
| H | 0.48976600  | -1.04571700 | -3.43331300 |
| C | -0.89036900 | 1.70554800  | -4.90510200 |
| H | -1.83166100 | 2.01670400  | -5.34877700 |
| C | 0.16775300  | 2.57117500  | -4.83490100 |
| H | 0.08631300  | 3.58153200  | -5.22950200 |
| C | 0.65490500  | 1.91120600  | 5.52599000  |
| H | 1.53268700  | 2.45804400  | 5.85735000  |
| C | -0.64318600 | 2.43734400  | 5.78321000  |
| H | -0.74815100 | 3.37402600  | 6.32389900  |
| C | -1.75099800 | 1.76017600  | 5.34800100  |
| H | -2.74910000 | 2.14855300  | 5.53718200  |
| C | 0.81132000  | 0.72835000  | 4.85031700  |
| H | 1.80874000  | 0.34843100  | 4.66338100  |
| N | 1.79700100  | 1.15407000  | 1.46227400  |
| S | 3.27230700  | 1.52308000  | 2.19493900  |
| C | 4.34588400  | 2.24050400  | 0.80426700  |
| O | 3.93305100  | 0.30225700  | 2.62785900  |
| O | 2.99529400  | 2.63889300  | 3.09074500  |
| F | 3.58007700  | 2.71483800  | -0.17582400 |
| F | 5.06187800  | 3.23344400  | 1.33005500  |
| F | 5.16017000  | 1.29931500  | 0.34577400  |
| H | -5.55959000 | 2.55120300  | -0.74042700 |
| H | -6.25860900 | 4.64441300  | 1.38205900  |
| C | -1.53453100 | 4.11652700  | 0.05678000  |
| C | -1.23422000 | 3.86098300  | 1.40279100  |
| C | -0.48017500 | 4.56754100  | -0.75995300 |
| C | 0.04981200  | 4.07599000  | 1.91895500  |
| H | -2.00055400 | 3.50015000  | 2.07858700  |
| C | 0.80163700  | 4.77723200  | -0.25704200 |

|   |             |            |             |
|---|-------------|------------|-------------|
| H | -0.65843300 | 4.76252700 | -1.81347500 |
| C | 1.07339400  | 4.54389300 | 1.09288400  |
| H | 0.24164000  | 3.88631000 | 2.97204100  |
| H | 1.58950500  | 5.12257100 | -0.92110300 |
| H | 2.06595900  | 4.71718300 | 1.49750000  |
| C | -3.43023100 | 5.30428500 | -1.14683300 |
| H | -2.74608900 | 5.60374700 | -1.94960600 |
| H | -4.40472600 | 5.11760300 | -1.61771400 |
| C | -3.56995600 | 6.43609000 | -0.16573800 |
| H | -4.36644100 | 6.34054000 | 0.57301700  |
| C | -2.81352100 | 7.53715900 | -0.15291100 |
| H | -2.01901300 | 7.63756700 | -0.89486400 |
| C | -7.85824100 | 3.75145800 | 0.14415300  |
| H | -7.94479000 | 3.01922300 | -0.66527900 |
| H | -8.48565700 | 3.41049100 | 0.97925800  |
| H | -8.29145100 | 4.69876000 | -0.20526600 |
| C | -2.95994200 | 8.67759700 | 0.81338000  |
| H | -3.16240400 | 9.62211400 | 0.28988800  |
| H | -3.77674200 | 8.50223700 | 1.52194500  |
| H | -2.03755600 | 8.83082700 | 1.39011000  |

INT-13'

0 imaginary frequency

H = -5315.378086

G = -5315.584195

E(M06-2X-DCM) = -5316.274414

E(M06-2X-cyclohexane) = -5316.244824

|   |             |             |             |
|---|-------------|-------------|-------------|
| O | -0.58011000 | -2.39386600 | -0.92380900 |
| O | -2.62095500 | -0.98607300 | -0.16580100 |
| P | -0.98325500 | -1.02062500 | -0.11915300 |
| O | -0.48324700 | 0.20846800  | -0.81422900 |
| C | -1.61854500 | -2.51824500 | -4.98039400 |
| C | -2.53802800 | -2.87245800 | -3.99843100 |
| C | -2.15940100 | -2.90589700 | -2.64865700 |
| C | 0.08241000  | -2.15859600 | -3.25295500 |
| C | -0.31490300 | -2.20015800 | -4.60171500 |
| C | -3.35736100 | -2.03858000 | 0.38818700  |
| C | -3.52774200 | -3.21553700 | -0.34285300 |
| C | -4.12057800 | -4.32727000 | 0.27702300  |
| C | -4.63733700 | -4.23302000 | 1.56391800  |
| C | -4.57312000 | -3.00915100 | 2.22719100  |
| C | -3.93118500 | -1.89173500 | 1.66669500  |
| H | 0.42233400  | -1.95701200 | -5.36102700 |
| H | -5.01244700 | -2.90532800 | 3.21483500  |



|   |             |             |             |
|---|-------------|-------------|-------------|
| C | -3.26669900 | -3.53339600 | -1.81294000 |
| C | -4.51219500 | -3.18522900 | -2.69727400 |
| H | -4.83102600 | -2.16135900 | -2.46820200 |
| H | -5.36123900 | -3.84815400 | -2.50394100 |
| H | -5.07808500 | -5.75020300 | -1.05099500 |
| H | -3.75573800 | -6.44121400 | -0.11684400 |
| C | -0.88436100 | -2.48102300 | -2.28162500 |
| H | -1.90163200 | -2.50081400 | -6.02997100 |
| H | -5.09888900 | -5.09239200 | 2.04376300  |
| C | -3.99377900 | -3.25801900 | -4.15052600 |
| H | -4.53861500 | -2.59087800 | -4.82858800 |
| H | -4.09578100 | -4.27261500 | -4.56069900 |
| C | -4.08363300 | -5.53328800 | -0.63590900 |
| C | -3.09831500 | -5.08822100 | -1.73672100 |
| H | -2.07146000 | -5.31446000 | -1.42758500 |
| H | -3.27195600 | -5.57501100 | -2.70156300 |
| C | -3.96773500 | -0.60462900 | 2.43052600  |
| C | -3.30591000 | -0.50008600 | 3.67790200  |
| C | -4.78996500 | 0.45498200  | 1.97119300  |
| C | -2.42923900 | -1.51718400 | 4.17498100  |
| C | -3.49804000 | 0.67784900  | 4.49352000  |
| C | -4.95137400 | 1.63806300  | 2.78625200  |
| C | -1.80998300 | -1.39177000 | 5.39028000  |
| H | -2.22436300 | -2.37909900 | 3.55345200  |
| C | -2.84743900 | 0.76016200  | 5.76524000  |
| C | -4.31264600 | 1.71193500  | 4.02667900  |
| C | -2.02943900 | -0.24518000 | 6.20527400  |
| H | -1.12550000 | -2.16543600 | 5.72544000  |
| H | -3.01821500 | 1.64551400  | 6.37380700  |
| H | -4.45230000 | 2.59781700  | 4.64315200  |
| H | -1.53468400 | -0.16794600 | 7.16977100  |
| C | 1.50640300  | -1.82885400 | -2.93572300 |
| C | 2.03629000  | -0.57076200 | -3.31628600 |
| C | 2.35566200  | -2.81442200 | -2.37187200 |
| C | 1.22077900  | 0.49509200  | -3.82083600 |
| C | 3.45485200  | -0.32328500 | -3.18849900 |
| C | 3.76140100  | -2.52824500 | -2.19446200 |
| C | 1.76959800  | 1.68581900  | -4.22301600 |
| H | 0.14656300  | 0.35932700  | -3.86262600 |
| C | 3.99154200  | 0.92287600  | -3.64696700 |
| C | 4.27628000  | -1.30149300 | -2.62216000 |
| C | 3.17650800  | 1.89978700  | -4.15540200 |
| H | 1.12059600  | 2.47404200  | -4.59374800 |
| H | 5.06713000  | 1.07164500  | -3.58261800 |

|   |             |             |             |
|---|-------------|-------------|-------------|
| H | 5.33903900  | -1.10069000 | -2.50597100 |
| H | 3.59766400  | 2.83888100  | -4.50563000 |
| C | -6.30155300 | 1.44501300  | 0.31967500  |
| H | -6.83619900 | 1.37522900  | -0.62387300 |
| C | -5.51214200 | 0.40346000  | 0.73468600  |
| H | -5.43569100 | -0.48691600 | 0.12103800  |
| C | -6.43789700 | 2.61712300  | 1.11726900  |
| H | -7.07360300 | 3.43040300  | 0.77683600  |
| C | -5.78254500 | 2.70346300  | 2.31679600  |
| H | -5.88914800 | 3.58513700  | 2.94486400  |
| C | 2.74096900  | -5.03832800 | -1.43322300 |
| H | 2.35878600  | -6.01340200 | -1.14340300 |
| C | 4.11832000  | -4.73933200 | -1.23481600 |
| H | 4.77330300  | -5.48413000 | -0.79098100 |
| C | 4.61080800  | -3.52011200 | -1.61222800 |
| H | 5.66333800  | -3.28080400 | -1.47982400 |
| C | 1.89466700  | -4.11374700 | -1.98644800 |
| H | 0.85236700  | -4.36755800 | -2.13717200 |
| C | -1.69792600 | 3.82822700  | -0.90637100 |
| C | -2.20508100 | 3.06129600  | 0.35403400  |
| H | -3.30011200 | 3.02122800  | 0.31244300  |
| H | -1.86578300 | 2.02350400  | 0.30607900  |
| C | -1.77649800 | 3.65139000  | 1.67439500  |
| C | -0.16193100 | 4.01015000  | -0.80117000 |
| H | 0.03929900  | 4.65388500  | 0.06052800  |
| H | 0.22550300  | 4.50604900  | -1.69813800 |
| N | 0.57812800  | 2.75310200  | -0.59947800 |
| C | 1.81177100  | 2.71028000  | -0.13258700 |
| N | 2.41279100  | 1.54920600  | 0.15828100  |
| C | 3.76245000  | 1.37769400  | 0.60443300  |
| C | 4.82015900  | 1.60343200  | -0.27589900 |
| C | 4.00092600  | 0.91932100  | 1.90492100  |
| C | 6.13153900  | 1.38695000  | 0.15361200  |
| C | 5.31635500  | 0.70411200  | 2.31557200  |
| H | 3.16812600  | 0.71976300  | 2.57170000  |
| C | 6.38560600  | 0.93792300  | 1.44735300  |
| H | 7.40341700  | 0.77398900  | 1.77915200  |
| C | 5.58266400  | 0.16704800  | 3.70159700  |
| C | 7.25211300  | 1.62753000  | -0.82354100 |
| F | 4.68859300  | 0.63601500  | 4.59349100  |
| F | 6.81617000  | 0.51583400  | 4.13484700  |
| F | 5.51651900  | -1.17863900 | 3.73045900  |
| F | 8.46464800  | 1.44129600  | -0.27027800 |
| F | 7.21238400  | 2.88648100  | -1.31498400 |

|   |             |             |             |
|---|-------------|-------------|-------------|
| F | 7.16326300  | 0.79556300  | -1.89290200 |
| S | 2.62740400  | 4.26971800  | 0.10890500  |
| H | 4.61312300  | 1.92464200  | -1.29120100 |
| H | 1.86040600  | 0.67541400  | 0.15288900  |
| H | 0.10648800  | 1.84376500  | -0.77546700 |
| C | -1.01946200 | 3.01795900  | 2.57768900  |
| H | -0.67496300 | 2.00364400  | 2.36943300  |
| H | 3.72068600  | 3.74556400  | 0.69483900  |
| N | -0.60719800 | -1.29632000 | 1.42735700  |
| S | 0.88758500  | -1.30896900 | 1.94468400  |
| O | 1.06676000  | -0.53015300 | 3.18000700  |
| O | 1.90320600  | -1.08852400 | 0.87677800  |
| C | 1.14703000  | -3.08696500 | 2.45462200  |
| F | 0.27301700  | -3.42643300 | 3.41386900  |
| F | 2.38688900  | -3.23619000 | 2.93283400  |
| F | 0.97973900  | -3.90110500 | 1.41021900  |
| C | -2.06857400 | 3.12043100  | -2.22533100 |
| C | -2.84495600 | 1.95585300  | -2.26904300 |
| C | -1.64423400 | 3.66440400  | -3.45102300 |
| C | -3.17505500 | 1.35469300  | -3.48679900 |
| H | -3.19352700 | 1.48990000  | -1.35648000 |
| C | -1.97444100 | 3.07043800  | -4.66800200 |
| H | -1.05100800 | 4.57552800  | -3.46807400 |
| C | -2.74298300 | 1.90460800  | -4.69134900 |
| H | -3.76591700 | 0.44291100  | -3.48363000 |
| H | -1.63388700 | 3.52105500  | -5.59704400 |
| H | -2.99943700 | 1.43391100  | -5.63666100 |
| C | -2.28177000 | 5.28671100  | -0.92707100 |
| H | -1.94164200 | 5.79885500  | -0.01588800 |
| H | -1.84188900 | 5.83615900  | -1.76799700 |
| C | -3.78141900 | 5.37565200  | -1.01427200 |
| C | -4.45069900 | 5.92183600  | -2.03304200 |
| H | -3.88754500 | 6.32428400  | -2.87719100 |
| H | -4.34668800 | 4.97178700  | -0.17375100 |
| H | -2.14148800 | 4.65188500  | 1.91562600  |
| C | -0.61913100 | 3.57598200  | 3.91287100  |
| H | 0.47387000  | 3.61960100  | 4.01459700  |
| H | -1.01695600 | 4.58523800  | 4.06905000  |
| H | -0.97890900 | 2.93041600  | 4.72412600  |
| C | -5.94534900 | 6.03093100  | -2.12648400 |
| H | -6.32505200 | 5.50926600  | -3.01537500 |
| H | -6.43544100 | 5.60086300  | -1.24633400 |
| H | -6.26554300 | 7.07801600  | -2.21652600 |

INT-13' -1

0 imaginary frequency

H = -5315.379142

G = -5315.585391

E(M06-2X-DCM) = -5316.274056

E(M06-2X-cyclohexane) = -5316.244671

|   |             |             |             |
|---|-------------|-------------|-------------|
| O | -0.53091400 | -2.56243300 | -0.28177900 |
| O | -2.61788100 | -1.05245700 | 0.01697300  |
| P | -0.98247500 | -1.03199200 | 0.10779900  |
| O | -0.48616000 | -0.02627100 | -0.88534900 |
| C | -1.45254000 | -3.81418700 | -4.17108600 |
| C | -2.39484900 | -3.90508700 | -3.15167700 |
| C | -2.05370800 | -3.56174800 | -1.83564800 |
| C | 0.19614200  | -2.96816400 | -2.56709200 |
| C | -0.16293400 | -3.38290000 | -3.86238400 |
| C | -3.34736800 | -1.93247700 | 0.82378600  |
| C | -3.47799100 | -3.26714500 | 0.43745100  |
| C | -4.06495800 | -4.18296400 | 1.32530400  |
| C | -4.61190000 | -3.75565700 | 2.52964100  |
| C | -4.58588400 | -2.39640300 | 2.83654200  |
| C | -3.95351000 | -1.45786600 | 2.00375400  |
| H | 0.59320100  | -3.34538100 | -4.64089600 |
| H | -5.05016900 | -2.03898900 | 3.75086100  |
| C | -3.17366200 | -3.96431600 | -0.88579300 |
| C | -4.39957500 | -3.89654400 | -1.85862400 |
| H | -4.74045300 | -2.85626600 | -1.92250600 |
| H | -5.24306800 | -4.50147300 | -1.51172000 |
| H | -4.96617600 | -5.93297500 | 0.41421500  |
| H | -3.65546500 | -6.31615400 | 1.52508000  |
| C | -0.79519800 | -3.02678000 | -1.56902600 |
| H | -1.70628500 | -4.08901200 | -5.19195800 |
| H | -5.06810100 | -4.46359200 | 3.21704800  |
| C | -3.84039200 | -4.34818200 | -3.22604600 |
| H | -4.37625700 | -3.90104100 | -4.07143100 |
| H | -3.91631100 | -5.43780900 | -3.34848100 |
| C | -3.98579600 | -5.58967600 | 0.77382300  |
| C | -2.98162600 | -5.43648900 | -0.38765100 |
| H | -1.95906200 | -5.54715100 | -0.00904800 |
| H | -3.12324800 | -6.17003800 | -1.18759500 |
| C | -4.03648000 | -0.01131100 | 2.37961700  |
| C | -3.40289900 | 0.45762500  | 3.55548700  |
| C | -4.87362300 | 0.85249500  | 1.62944200  |
| C | -2.51874100 | -0.35600100 | 4.33404800  |
| C | -3.63316500 | 1.81394500  | 3.99965500  |

|   |             |             |             |
|---|-------------|-------------|-------------|
| C | -5.07709000 | 2.21267200  | 2.07443100  |
| C | -1.92574800 | 0.12396100  | 5.47160500  |
| H | -2.28741400 | -1.35466500 | 3.98721400  |
| C | -3.00782100 | 2.26987400  | 5.20317100  |
| C | -4.46052300 | 2.65212000  | 3.24874900  |
| C | -2.18046400 | 1.45028100  | 5.92228600  |
| H | -1.23482800 | -0.50694800 | 6.02294300  |
| H | -3.20643000 | 3.28763900  | 5.53205900  |
| H | -4.63000600 | 3.67269700  | 3.58648700  |
| H | -1.70540300 | 1.81025100  | 6.83100700  |
| C | 1.60947000  | -2.54896000 | -2.31378900 |
| C | 2.14848900  | -1.43819800 | -3.00940700 |
| C | 2.44365200  | -3.33431800 | -1.47803500 |
| C | 1.34682800  | -0.56025500 | -3.81060500 |
| C | 3.56213400  | -1.15080900 | -2.91399000 |
| C | 3.84287800  | -2.99629500 | -1.34601800 |
| C | 1.90560600  | 0.47956100  | -4.50876500 |
| H | 0.27474600  | -0.71402600 | -3.84456800 |
| C | 4.11009600  | -0.07229100 | -3.68053800 |
| C | 4.36799700  | -1.92813300 | -2.07821600 |
| C | 3.30919700  | 0.71896300  | -4.46127300 |
| H | 1.26721700  | 1.12824800  | -5.10163100 |
| H | 5.18273300  | 0.10020000  | -3.62755900 |
| H | 5.42625300  | -1.69218400 | -1.99083800 |
| H | 3.73894800  | 1.53039000  | -5.04334200 |
| C | -6.38013100 | 1.29245600  | -0.24851300 |
| H | -6.89770800 | 0.94343100  | -1.13825000 |
| C | -5.57181100 | 0.43341300  | 0.45054700  |
| H | -5.46294200 | -0.59137700 | 0.11432100  |
| C | -6.55963800 | 2.63708100  | 0.18428700  |
| H | -7.20658700 | 3.30328800  | -0.38000900 |
| C | -5.92682500 | 3.07736200  | 1.31563800  |
| H | -6.06327400 | 4.09793300  | 1.66618500  |
| C | 2.80589200  | -5.21306000 | 0.04344300  |
| H | 2.41736800  | -6.07582400 | 0.57777300  |
| C | 4.17586900  | -4.85680000 | 0.19172600  |
| H | 4.81883600  | -5.44494100 | 0.84087200  |
| C | 4.67665900  | -3.78216900 | -0.49075800 |
| H | 5.72412200  | -3.50465800 | -0.39905600 |
| C | 1.97447700  | -4.48370600 | -0.76522800 |
| H | 0.93788500  | -4.78020000 | -0.87017600 |
| C | -1.66643900 | 3.41789800  | -2.06524300 |
| C | -2.25679400 | 3.07392700  | -0.66409300 |
| H | -3.35000200 | 3.06558500  | -0.75738300 |

|   |             |             |             |
|---|-------------|-------------|-------------|
| H | -1.95932300 | 2.06020800  | -0.38223800 |
| C | -1.86492200 | 4.01967100  | 0.44300900  |
| C | -0.13430900 | 3.61658200  | -1.94677700 |
| H | 0.03730200  | 4.48500200  | -1.30335300 |
| H | 0.29796700  | 3.82844400  | -2.93133200 |
| N | 0.58276300  | 2.47610800  | -1.35334300 |
| C | 1.80379500  | 2.57608000  | -0.86189600 |
| N | 2.39667800  | 1.55142200  | -0.23577000 |
| C | 3.73060500  | 1.52748700  | 0.28440300  |
| C | 4.81782200  | 1.50708200  | -0.58873900 |
| C | 3.92466600  | 1.45579100  | 1.66839100  |
| C | 6.11399900  | 1.43555400  | -0.07283500 |
| C | 5.22538100  | 1.37979600  | 2.16592300  |
| H | 3.06962100  | 1.44101600  | 2.33678900  |
| C | 6.32376200  | 1.37230600  | 1.30258600  |
| H | 7.32970300  | 1.31987600  | 1.70031200  |
| C | 5.44422800  | 1.25724400  | 3.65509600  |
| C | 7.26785100  | 1.40840600  | -1.04050600 |
| F | 6.66252700  | 1.72513700  | 4.01256600  |
| F | 5.37642000  | -0.02629000 | 4.05991600  |
| F | 4.52070400  | 1.95045600  | 4.34885100  |
| F | 8.46000900  | 1.37520200  | -0.41714700 |
| F | 7.25571300  | 2.49248400  | -1.84852600 |
| F | 7.20622200  | 0.32320600  | -1.85427900 |
| S | 2.61411200  | 4.14539000  | -1.05570500 |
| H | 4.64547800  | 1.52586600  | -1.65967200 |
| H | 1.84845500  | 0.70347200  | -0.01312700 |
| H | 0.11054900  | 1.55309200  | -1.27208500 |
| C | -1.16268200 | 3.66869300  | 1.52644200  |
| H | -0.83590800 | 2.63336000  | 1.63768800  |
| H | 3.69626100  | 3.81416800  | -0.32598800 |
| N | -0.64465500 | -0.86731200 | 1.67878400  |
| S | 0.83592800  | -0.72950100 | 2.21700900  |
| O | 0.98286100  | 0.35074000  | 3.20456100  |
| O | 1.87725600  | -0.79245000 | 1.15265400  |
| C | 1.08863100  | -2.30539400 | 3.18753300  |
| F | 0.19493700  | -2.38400400 | 4.18489400  |
| F | 2.31813800  | -2.31162000 | 3.71333400  |
| F | 0.94611000  | -3.37017200 | 2.39535900  |
| C | -1.99512800 | 2.34701900  | -3.12756000 |
| C | -2.78519300 | 1.22302000  | -2.85234700 |
| C | -1.51969200 | 2.50018800  | -4.44302100 |
| C | -3.07801200 | 0.28655900  | -3.84767100 |
| H | -3.17420800 | 1.05154200  | -1.85691900 |

|   |             |             |             |
|---|-------------|-------------|-------------|
| C | -1.81329100 | 1.57056300  | -5.43940700 |
| H | -0.91415600 | 3.36362800  | -4.70769800 |
| C | -2.59511000 | 0.45179700  | -5.14372500 |
| H | -3.68013400 | -0.58191800 | -3.59570600 |
| H | -1.43370200 | 1.72326300  | -6.44665600 |
| H | -2.82292600 | -0.27904000 | -5.91493600 |
| C | -2.21624200 | 4.80515000  | -2.55201400 |
| H | -1.92154300 | 5.57999600  | -1.83423400 |
| H | -1.71489200 | 5.05829200  | -3.49752900 |
| C | -3.70517500 | 4.85881900  | -2.75843500 |
| C | -4.52083900 | 5.73991800  | -2.17226300 |
| H | -4.09814200 | 6.46859300  | -1.47721400 |
| H | -4.12308600 | 4.12967200  | -3.45293300 |
| H | -2.21549800 | 5.05039100  | 0.36245600  |
| C | -0.80317000 | 4.58699300  | 2.65873400  |
| H | -1.21034600 | 4.21006900  | 3.60566500  |
| H | 0.28555800  | 4.64670900  | 2.79316000  |
| H | -1.18317000 | 5.60217200  | 2.49670300  |
| C | -6.00350500 | 5.82686800  | -2.39422100 |
| H | -6.55335100 | 5.69037000  | -1.45316900 |
| H | -6.29150400 | 6.81217600  | -2.78550700 |
| H | -6.34914000 | 5.06656100  | -3.10265600 |

INT-13' -2

0 imaginary frequency

H = -5315.376211

G = -5315.581662

E(M06-2X-DCM) = -5316.271068

E(M06-2X-cyclohexane) = -5316.239360

|   |             |             |             |
|---|-------------|-------------|-------------|
| O | -0.85478100 | -2.72442700 | -0.26362200 |
| O | -2.66680800 | -0.96190100 | 0.31311400  |
| P | -1.04841100 | -1.15472700 | 0.18414700  |
| O | -0.58692900 | -0.21405500 | -0.89207900 |
| C | -2.44275900 | -3.79226200 | -3.99005100 |
| C | -3.24566400 | -3.77155800 | -2.85413600 |
| C | -2.69340300 | -3.49418200 | -1.59448600 |
| C | -0.50383400 | -3.17973100 | -2.62519900 |
| C | -1.07884600 | -3.53077800 | -3.85905700 |
| C | -3.39963400 | -1.74404100 | 1.20937700  |
| C | -3.76535800 | -3.03982700 | 0.84376800  |
| C | -4.36156900 | -3.87747200 | 1.79972800  |
| C | -4.69017700 | -3.39526500 | 3.06163100  |
| C | -4.42755600 | -2.05989100 | 3.36335100  |
| C | -3.77190400 | -1.20868200 | 2.45798800  |

|   |             |             |             |
|---|-------------|-------------|-------------|
| H | -0.43423600 | -3.57744100 | -4.73195800 |
| H | -4.71397700 | -1.65720800 | 4.33036500  |
| C | -3.72874700 | -3.75203700 | -0.50613900 |
| C | -5.04646700 | -3.49988300 | -1.31486300 |
| H | -5.24046200 | -2.42135900 | -1.34284900 |
| H | -5.91575900 | -3.98358900 | -0.85882000 |
| H | -5.60390100 | -5.47130600 | 1.01055200  |
| H | -4.23338500 | -6.04968300 | 1.95190200  |
| C | -1.35110700 | -3.13113300 | -1.50041300 |
| H | -2.86394100 | -4.01885100 | -4.96634000 |
| H | -5.15577500 | -4.04183200 | 3.80121200  |
| C | -4.73574800 | -4.01060900 | -2.73898400 |
| H | -5.30713400 | -3.48357200 | -3.51187200 |
| H | -4.97667600 | -5.07784900 | -2.84347100 |
| C | -4.54861900 | -5.27304300 | 1.24572400  |
| C | -3.68290300 | -5.24368600 | -0.03159100 |
| H | -2.64696200 | -5.50036700 | 0.21782600  |
| H | -4.02282600 | -5.93910900 | -0.80546100 |
| C | -3.56155200 | 0.22172600  | 2.84634400  |
| C | -2.70633900 | 0.54372200  | 3.92813900  |
| C | -4.32085400 | 1.23741900  | 2.21223400  |
| C | -1.89152800 | -0.43172000 | 4.58792100  |
| C | -2.62607600 | 1.91016600  | 4.39382900  |
| C | -4.20862000 | 2.60405900  | 2.67126400  |
| C | -1.08704200 | -0.09080200 | 5.64242800  |
| H | -1.88491200 | -1.44724500 | 4.21325000  |
| C | -1.78406500 | 2.22032600  | 5.50791800  |
| C | -3.37155700 | 2.90109100  | 3.75037000  |
| C | -1.03987200 | 1.24934500  | 6.12065500  |
| H | -0.45776400 | -0.84662400 | 6.10309500  |
| H | -1.74723400 | 3.25110700  | 5.85317600  |
| H | -3.30449900 | 3.92864900  | 4.10252400  |
| H | -0.39813700 | 1.49812000  | 6.96158500  |
| C | 0.96788100  | -2.91972800 | -2.55791800 |
| C | 1.52630600  | -1.83246900 | -3.27465200 |
| C | 1.81243200  | -3.81667900 | -1.85658900 |
| C | 0.72763600  | -0.86490300 | -3.96730400 |
| C | 2.96182800  | -1.66510400 | -3.31684000 |
| C | 3.24256800  | -3.60967900 | -1.86968900 |
| C | 1.29973100  | 0.15956200  | -4.67706500 |
| H | -0.35109700 | -0.94445500 | -3.91082500 |
| C | 3.51921900  | -0.58352700 | -4.07092900 |
| C | 3.77959300  | -2.55405500 | -2.61219200 |
| C | 2.71611300  | 0.30156600  | -4.73913400 |



|   |             |             |             |
|---|-------------|-------------|-------------|
| H | 0.66685400  | 0.87316900  | -5.19872100 |
| H | 4.60212300  | -0.48329500 | -4.09914200 |
| H | 4.85878100  | -2.41905700 | -2.63810600 |
| H | 3.15244500  | 1.11402700  | -5.31431800 |
| C | -5.97039100 | 1.97671700  | 0.56217400  |
| H | -6.66005900 | 1.74316800  | -0.24447200 |
| C | -5.23937100 | 0.97404000  | 1.14484400  |
| H | -5.36116300 | -0.04605800 | 0.79926100  |
| C | -5.83937600 | 3.32429200  | 1.00513300  |
| H | -6.43278200 | 4.10602100  | 0.53771000  |
| C | -4.98194300 | 3.62331300  | 2.03083200  |
| H | -4.88379900 | 4.64453200  | 2.39259000  |
| C | 2.16180900  | -5.79428700 | -0.46498700 |
| H | 1.75641400  | -6.64723200 | 0.07252100  |
| C | 3.56601500  | -5.56145700 | -0.45062700 |
| H | 4.21722900  | -6.23054400 | 0.10510300  |
| C | 4.08861600  | -4.50056500 | -1.13841100 |
| H | 5.15771900  | -4.30545600 | -1.13441600 |
| C | 1.31781300  | -4.95474500 | -1.14308700 |
| H | 0.25232600  | -5.15183400 | -1.14278600 |
| C | -1.62191000 | 3.73197100  | -1.69524700 |
| C | -1.28147000 | 4.43705200  | -0.33876200 |
| H | -0.65585700 | 5.31425900  | -0.55324200 |
| H | -2.23139300 | 4.83896400  | 0.03845400  |
| C | -0.65378800 | 3.64400400  | 0.78283800  |
| C | -0.34599100 | 3.18703000  | -2.38763800 |
| H | 0.31465900  | 4.01914600  | -2.63480600 |
| H | -0.62423200 | 2.68855600  | -3.32247100 |
| N | 0.41833600  | 2.22344800  | -1.58952700 |
| C | 1.70199600  | 2.29849400  | -1.30397700 |
| N | 2.29739700  | 1.32676600  | -0.59680300 |
| C | 3.62301900  | 1.33437000  | -0.06437400 |
| C | 4.48867700  | 0.29785900  | -0.41118400 |
| C | 4.02339300  | 2.31214300  | 0.85055700  |
| C | 5.77062600  | 0.26027500  | 0.13860500  |
| C | 5.31006000  | 2.26691900  | 1.38604300  |
| H | 3.32601300  | 3.08291700  | 1.15625400  |
| C | 6.19106900  | 1.24328400  | 1.03302800  |
| H | 7.18579200  | 1.20645600  | 1.45975900  |
| C | 5.76015900  | 3.36129000  | 2.32003000  |
| C | 6.68764200  | -0.86866400 | -0.26072700 |
| F | 4.73520700  | 3.84786400  | 3.05106500  |
| F | 6.28287800  | 4.40432200  | 1.63153200  |
| F | 6.71130500  | 2.93293300  | 3.17283300  |

|   |             |             |             |
|---|-------------|-------------|-------------|
| F | 6.81179300  | -0.93695900 | -1.61122000 |
| F | 6.21441300  | -2.06491600 | 0.14402200  |
| F | 7.92622600  | -0.72384300 | 0.24955500  |
| S | 2.61330000  | 3.70099500  | -1.90461800 |
| H | 4.15023800  | -0.47617800 | -1.08993500 |
| H | 1.75771000  | 0.48052700  | -0.35276300 |
| H | -0.06399500 | 1.35092200  | -1.28970500 |
| C | 0.30306800  | 4.13366000  | 1.58146600  |
| H | 0.70034200  | 5.12820600  | 1.36064000  |
| H | 3.81260900  | 3.24171000  | -1.50025600 |
| N | -0.47194600 | -1.04666800 | 1.68254700  |
| S | 1.07727800  | -1.05258900 | 2.02608900  |
| O | 1.40902000  | -0.10330700 | 3.09315500  |
| O | 1.95645900  | -1.06226600 | 0.82395200  |
| C | 1.33786400  | -2.73300100 | 2.79962000  |
| F | 2.62233100  | -2.87178900 | 3.14679200  |
| F | 1.00981800  | -3.70478300 | 1.94468800  |
| F | 0.58031500  | -2.85138400 | 3.89993100  |
| C | -2.26579300 | 4.80986900  | -2.60151800 |
| C | -1.71253100 | 5.24702700  | -3.81430200 |
| C | -3.47524200 | 5.40587000  | -2.19782300 |
| C | -2.32928200 | 6.23893100  | -4.58313000 |
| H | -0.79225400 | 4.81825400  | -4.19524100 |
| C | -4.09318100 | 6.39417300  | -2.96055500 |
| H | -3.95239000 | 5.08879200  | -1.27519200 |
| C | -3.52092500 | 6.82096400  | -4.16048400 |
| H | -1.86956600 | 6.55056200  | -5.51749900 |
| H | -5.02688300 | 6.83065700  | -2.61530900 |
| H | -4.00064200 | 7.59211100  | -4.75692300 |
| C | -2.64256100 | 2.56434200  | -1.48048300 |
| H | -2.18479400 | 1.76644400  | -0.88913000 |
| H | -3.46705700 | 2.95006600  | -0.86780200 |
| C | -3.20230500 | 1.98616300  | -2.75608500 |
| C | -3.07708000 | 0.71247700  | -3.14450000 |
| H | -2.51981100 | 0.02156000  | -2.51349800 |
| H | -3.76704600 | 2.67396800  | -3.38704400 |
| H | -1.08401700 | 2.66979500  | 1.01541100  |
| C | 0.83898600  | 3.46763100  | 2.81901700  |
| H | 0.46079800  | 3.97064200  | 3.72027100  |
| H | 0.55807600  | 2.41269500  | 2.88439300  |
| H | 1.93335800  | 3.53023300  | 2.87745400  |
| C | -3.67600500 | 0.14265600  | -4.39965100 |
| H | -4.20450200 | 0.90660600  | -4.98087500 |
| H | -2.90766100 | -0.30698900 | -5.04341000 |

H -4.38781600 -0.66147800 -4.16727100

INT-13' -3

0 imaginary frequency

H = -5315.373773

G = -5315.580042

E(M06-2X-DCM) = -5316.268309

E(M06-2X-cyclohexane) = -5316.239360

|   |             |             |             |
|---|-------------|-------------|-------------|
| O | -0.76371800 | -2.59963100 | -0.89739100 |
| O | -2.67780200 | -1.03988800 | -0.10540700 |
| P | -1.04999400 | -1.17205700 | -0.14432000 |
| O | -0.53070100 | -0.01399800 | -0.94657300 |
| C | -2.02535700 | -2.85635000 | -4.88255400 |
| C | -2.90474600 | -3.12177000 | -3.83791700 |
| C | -2.45616000 | -3.11035700 | -2.50912400 |
| C | -0.22387100 | -2.47286200 | -3.26666500 |
| C | -0.69271200 | -2.56705200 | -4.58912800 |
| C | -3.44452300 | -2.01604000 | 0.53670200  |
| C | -3.72069300 | -3.21503700 | -0.12220500 |
| C | -4.34810700 | -4.25293600 | 0.58571500  |
| C | -4.79467000 | -4.05874300 | 1.88797300  |
| C | -4.62059500 | -2.80980300 | 2.48252300  |
| C | -3.93823100 | -1.76806200 | 1.83280100  |
| H | 0.00918700  | -2.38319600 | -5.39727200 |
| H | -4.99978800 | -2.62917000 | 3.48405900  |
| C | -3.55192400 | -3.62648600 | -1.58410600 |
| C | -4.81947200 | -3.24859000 | -2.42435500 |
| H | -5.06106000 | -2.19546200 | -2.23991600 |
| H | -5.69519900 | -3.84540900 | -2.15115100 |
| H | -5.45138600 | -5.68267000 | -0.61605600 |
| H | -4.12844000 | -6.40325200 | 0.29461500  |
| C | -1.14607100 | -2.72710200 | -2.23250800 |
| H | -2.36434700 | -2.87717100 | -5.91532800 |
| H | -5.28376200 | -4.86128000 | 2.43434600  |
| C | -4.38465400 | -3.43222900 | -3.89496500 |
| H | -4.92648100 | -2.77215100 | -4.58200400 |
| H | -4.56316800 | -4.46041700 | -4.24005100 |
| C | -4.42691400 | -5.50579700 | -0.25921000 |
| C | -3.47152100 | -5.18200500 | -1.42720100 |
| H | -2.44589500 | -5.45424300 | -1.15298000 |
| H | -3.72092900 | -5.70863000 | -2.35374900 |
| C | -3.82651300 | -0.44376600 | 2.52369200  |
| C | -3.04389100 | -0.31677200 | 3.69675400  |
| C | -4.60699300 | 0.64834600  | 2.06734200  |

|   |             |             |             |
|---|-------------|-------------|-------------|
| C | -2.22529800 | -1.37852600 | 4.19925700  |
| C | -3.04557800 | 0.93178800  | 4.42623200  |
| C | -4.58801900 | 1.89518700  | 2.79965500  |
| C | -1.48386600 | -1.22646200 | 5.34049400  |
| H | -2.16577300 | -2.30226100 | 3.63865800  |
| C | -2.26479300 | 1.04495700  | 5.61950700  |
| C | -3.81056900 | 2.00222700  | 3.95628600  |
| C | -1.50894500 | -0.00338900 | 6.06891800  |
| H | -0.84888800 | -2.03949800 | 5.67955400  |
| H | -2.28568600 | 1.98862400  | 6.15990900  |
| H | -3.80871800 | 2.93924800  | 4.50986400  |
| H | -0.91496500 | 0.09589100  | 6.97347400  |
| C | 1.21375400  | -2.13391600 | -3.02751100 |
| C | 1.72413900  | -0.88579300 | -3.46517900 |
| C | 2.08491100  | -3.09083000 | -2.44931100 |
| C | 0.89483800  | 0.14638600  | -4.01524000 |
| C | 3.13912500  | -0.61117700 | -3.35233700 |
| C | 3.48930900  | -2.78238200 | -2.30096100 |
| C | 1.42329000  | 1.33051700  | -4.46219200 |
| H | -0.17441800 | -0.01967600 | -4.06804800 |
| C | 3.65429000  | 0.63007300  | -3.84762600 |
| C | 3.98065400  | -1.55904000 | -2.76433200 |
| C | 2.82531400  | 1.57527500  | -4.39130100 |
| H | 0.76774800  | 2.08942100  | -4.88218000 |
| H | 4.72714700  | 0.79900400  | -3.78601200 |
| H | 5.04071300  | -1.33613700 | -2.66182400 |
| H | 3.23077200  | 2.50930100  | -4.77162600 |
| C | -6.21905400 | 1.63840600  | 0.51475400  |
| H | -6.85893900 | 1.54578400  | -0.35864400 |
| C | -5.45924000 | 0.57111000  | 0.91846300  |
| H | -5.50635400 | -0.35926300 | 0.36424100  |
| C | -6.18439400 | 2.86881000  | 1.23164500  |
| H | -6.80074400 | 3.70198700  | 0.90371400  |
| C | -5.38951100 | 2.98828700  | 2.34115200  |
| H | -5.36645000 | 3.91524300  | 2.91022000  |
| C | 2.51064400  | -5.28209900 | -1.45485200 |
| H | 2.14510200  | -6.25314800 | -1.13200500 |
| C | 3.88734400  | -4.96162400 | -1.28724200 |
| H | 4.55798400  | -5.68613700 | -0.83343600 |
| C | 4.35942900  | -3.74743500 | -1.70478300 |
| H | 5.41048600  | -3.49178300 | -1.59383400 |
| C | 1.64444400  | -4.38287900 | -2.01875900 |
| H | 0.60228800  | -4.65115800 | -2.14517100 |
| C | -1.63825300 | 3.93755500  | -0.65212300 |

|   |             |             |             |
|---|-------------|-------------|-------------|
| C | -1.50177100 | 4.38758700  | 0.84378300  |
| H | -1.03351800 | 5.38139700  | 0.86810900  |
| H | -2.52433400 | 4.53173500  | 1.21761900  |
| C | -0.78066600 | 3.47561300  | 1.80303000  |
| C | -0.25690300 | 3.61909200  | -1.28029400 |
| H | 0.38707800  | 4.49699900  | -1.24728700 |
| H | -0.39945900 | 3.36063400  | -2.33524400 |
| N | 0.47281300  | 2.49278800  | -0.68185500 |
| C | 1.72751300  | 2.48024700  | -0.27214800 |
| N | 2.35055900  | 1.32768700  | -0.00956200 |
| C | 3.71271800  | 1.20146400  | 0.42006500  |
| C | 3.99848300  | 0.77688500  | 1.72031300  |
| C | 4.73424800  | 1.43679300  | -0.49553400 |
| C | 5.33133800  | 0.61583400  | 2.09717800  |
| C | 6.06374900  | 1.26144000  | -0.10519700 |
| H | 4.48812700  | 1.72417400  | -1.51225600 |
| C | 6.36820300  | 0.85557800  | 1.19103200  |
| H | 7.39941600  | 0.72393800  | 1.49481300  |
| C | 7.14202300  | 1.49381200  | -1.12916400 |
| C | 5.65476300  | 0.12325800  | 3.48686400  |
| F | 8.37492600  | 1.26571300  | -0.64010200 |
| F | 7.11417800  | 2.75993300  | -1.60052400 |
| F | 6.97604500  | 0.68064600  | -2.20596900 |
| F | 4.76769100  | 0.57840500  | 4.39311700  |
| F | 6.88527200  | 0.52735500  | 3.87879900  |
| F | 5.64142000  | -1.22394500 | 3.54983500  |
| S | 2.66851200  | 3.97748400  | -0.01269100 |
| H | 3.19120500  | 0.56359800  | 2.41336500  |
| H | 1.84148100  | 0.43377300  | -0.08713000 |
| H | 0.02272500  | 1.55366200  | -0.76477400 |
| C | 0.12931200  | 3.89182200  | 2.69352100  |
| H | 0.38924100  | 4.95461700  | 2.71776900  |
| H | 1.63121000  | 4.62421500  | 0.56103500  |
| N | -0.59270600 | -1.37734000 | 1.38856400  |
| S | 0.92397100  | -1.49363400 | 1.82894900  |
| O | 1.20773600  | -0.72921800 | 3.05384900  |
| O | 1.89478300  | -1.34064000 | 0.71164000  |
| C | 1.09096400  | -3.28265700 | 2.34165600  |
| F | 2.34281800  | -3.51395700 | 2.74919800  |
| F | 0.80713300  | -4.09146300 | 1.31820200  |
| F | 0.25238800  | -3.55331100 | 3.35304000  |
| C | -2.27358300 | 5.12271400  | -1.41684900 |
| C | -1.64259000 | 5.80161200  | -2.46997400 |
| C | -3.54797400 | 5.58033500  | -1.03388200 |

|   |             |            |             |
|---|-------------|------------|-------------|
| C | -2.25117200 | 6.88580100 | -3.10949800 |
| H | -0.66358500 | 5.49778500 | -2.82341200 |
| C | -4.15761100 | 6.66124700 | -1.66700000 |
| H | -4.08353100 | 5.08336400 | -0.23052900 |
| C | -3.51097700 | 7.32405900 | -2.71170600 |
| H | -1.73052200 | 7.38392500 | -3.92334900 |
| H | -5.14313900 | 6.98494700 | -1.34204200 |
| H | -3.98449200 | 8.16694600 | -3.20761200 |
| C | -2.58275200 | 2.69121400 | -0.75149400 |
| H | -2.19207000 | 1.89483300 | -0.10995900 |
| H | -3.55203400 | 2.96784100 | -0.32749700 |
| C | -2.77522100 | 2.13445800 | -2.14034900 |
| C | -3.83818600 | 2.36643700 | -2.91629700 |
| H | -4.63384500 | 3.01296300 | -2.54292600 |
| H | -1.99473300 | 1.46700200 | -2.50524900 |
| H | -1.07196600 | 2.42569300 | 1.81254200  |
| C | 0.81138100  | 3.02039100 | 3.71075400  |
| H | 0.54273200  | 1.96579000 | 3.59527800  |
| H | 1.90455500  | 3.10387500 | 3.63682400  |
| H | 0.54664500  | 3.32794300 | 4.73163100  |
| C | -4.04249400 | 1.79576600 | -4.29071200 |
| H | -4.12826000 | 2.59050300 | -5.04479800 |
| H | -3.21544900 | 1.13843400 | -4.58071600 |
| H | -4.97208700 | 1.21246700 | -4.34588700 |

INT-13-1

0 imaginary frequency

H = -5315.395953

G = -5315.599031

E(M06-2X-DCM) = -5316.279016

E(M06-2X-cyclohexane) = -5316.254695

|   |             |             |             |
|---|-------------|-------------|-------------|
| C | -3.25225800 | 3.78500700  | -0.43221500 |
| C | -4.20415800 | 3.30318400  | 0.70427300  |
| H | -3.83802100 | 2.34215400  | 1.08415600  |
| H | -4.13527800 | 4.02494400  | 1.52808100  |
| C | -5.65568300 | 3.16589900  | 0.32483200  |
| C | -3.24943800 | 2.74968800  | -1.59158800 |
| H | -2.68752000 | 3.14607200  | -2.44820000 |
| H | -4.27288100 | 2.57664900  | -1.92548600 |
| N | -2.69985200 | 1.45707800  | -1.20892600 |
| C | -3.16788900 | 0.25754200  | -1.64197500 |
| N | -2.36603800 | -0.78914500 | -1.22711400 |
| C | -2.57094500 | -2.17124600 | -1.32596300 |
| C | -3.83965600 | -2.77455600 | -1.30834400 |

|   |             |             |             |
|---|-------------|-------------|-------------|
| C | -1.43364500 | -2.99157900 | -1.36786600 |
| C | -3.94862100 | -4.16194100 | -1.36249700 |
| C | -1.56413000 | -4.37927700 | -1.41349400 |
| H | -0.44616700 | -2.54200300 | -1.35931600 |
| C | -2.82043400 | -4.98113400 | -1.42445100 |
| H | -2.91976300 | -6.05842300 | -1.47847200 |
| C | -0.33298300 | -5.23679800 | -1.36662700 |
| C | -5.30724100 | -4.80171200 | -1.25082800 |
| F | 0.71606300  | -4.66452100 | -2.00463500 |
| F | -0.52730100 | -6.45177700 | -1.91683900 |
| F | 0.07515400  | -5.45343100 | -0.08277700 |
| F | -5.37620300 | -5.95856200 | -1.94646000 |
| F | -6.29378000 | -3.99875600 | -1.69087400 |
| F | -5.59913700 | -5.11257700 | 0.04166700  |
| S | -4.54395300 | 0.07990300  | -2.60520900 |
| H | -4.72650300 | -2.16037400 | -1.25921500 |
| C | -6.31166900 | 2.00698800  | 0.21609300  |
| H | -1.44069500 | -0.52133100 | -0.88939500 |
| H | -1.77722900 | 1.46956700  | -0.78002200 |
| H | 1.04587700  | 2.04412300  | 1.55784300  |
| O | 1.08926400  | -1.31052000 | 1.01864200  |
| O | 2.83234800  | -0.00068600 | -0.36774600 |
| P | 1.38779200  | 0.11529200  | 0.33235400  |
| O | 0.20768500  | 0.50307200  | -0.47801000 |
| C | 3.52953700  | -2.58719100 | 4.16693000  |
| C | 3.97290700  | -2.69123800 | 2.85353400  |
| C | 3.11782100  | -2.38501800 | 1.78242000  |
| C | 1.37439200  | -1.74533300 | 3.37915200  |
| C | 2.22360800  | -2.16142800 | 4.41631200  |
| C | 3.08843800  | -1.00024000 | -1.33409600 |
| C | 3.43825900  | -2.27894100 | -0.90717100 |
| C | 3.59903600  | -3.28234900 | -1.87891000 |
| C | 3.49199400  | -2.99142100 | -3.23411500 |
| C | 3.21456500  | -1.68441700 | -3.63176700 |
| C | 2.99312000  | -0.66123800 | -2.69686100 |
| H | 1.85361400  | -2.11468100 | 5.43617400  |
| H | 3.14434100  | -1.43962500 | -4.68740500 |
| C | 3.76309000  | -2.84209300 | 0.47637100  |
| C | 5.27247700  | -2.67162300 | 0.84923700  |
| H | 5.93063400  | -3.26305400 | 0.20512500  |
| H | 5.54703700  | -1.61628700 | 0.74011800  |
| H | 3.27116900  | -5.42300200 | -1.68987800 |
| H | 4.91553000  | -4.90502900 | -1.31327700 |
| C | 1.87800400  | -1.82733400 | 2.06737700  |

|   |              |              |              |
|---|--------------|--------------|--------------|
| H | 4. 18734200  | -2. 83664400 | 4. 99545700  |
| H | 3. 61831400  | -3. 77312700 | -3. 97842700 |
| C | 5. 34387100  | -3. 07764600 | 2. 33986500  |
| H | 5. 53210600  | -4. 15367300 | 2. 45585900  |
| H | 6. 14429200  | -2. 55742500 | 2. 87737400  |
| C | 3. 85715500  | -4. 62155300 | -1. 22925300 |
| C | 3. 45226100  | -4. 36091400 | 0. 23423900  |
| H | 3. 96784000  | -5. 00696700 | 0. 95038500  |
| H | 2. 37718900  | -4. 52867700 | 0. 34719200  |
| C | 2. 69916400  | 0. 72623500  | -3. 18163000 |
| C | 3. 73097200  | 1. 69558200  | -3. 18023000 |
| C | 1. 42563300  | 1. 03755200  | -3. 71350300 |
| C | 5. 06328700  | 1. 41038500  | -2. 74106200 |
| C | 3. 45820200  | 3. 02754700  | -3. 67028100 |
| C | 1. 17005700  | 2. 37096600  | -4. 21201000 |
| C | 6. 04241800  | 2. 36961900  | -2. 76042200 |
| H | 5. 29688700  | 0. 41025200  | -2. 39273500 |
| C | 4. 50402600  | 4. 00267000  | -3. 66046900 |
| C | 2. 18541800  | 3. 32966000  | -4. 16338400 |
| C | 5. 76083200  | 3. 68819000  | -3. 21804800 |
| H | 7. 04642800  | 2. 12313500  | -2. 42547000 |
| H | 4. 27869000  | 5. 00191500  | -4. 02587700 |
| H | 1. 98701800  | 4. 33152000  | -4. 53968900 |
| H | 6. 54860000  | 4. 43650000  | -3. 22265500 |
| C | -0. 01568600 | -1. 27072700 | 3. 66956300  |
| C | -1. 12051000 | -2. 05971800 | 3. 25997000  |
| C | -0. 22696300 | -0. 06558200 | 4. 38435700  |
| C | -0. 97525100 | -3. 31526100 | 2. 58779500  |
| C | -2. 46457100 | -1. 60672800 | 3. 53995900  |
| C | -1. 57810700 | 0. 37107400  | 4. 66191000  |
| C | -2. 06608200 | -4. 04881700 | 2. 20089100  |
| H | 0. 01950300  | -3. 69483100 | 2. 38440200  |
| C | -3. 57547700 | -2. 39688200 | 3. 10735100  |
| C | -2. 65538500 | -0. 40523300 | 4. 22752700  |
| C | -3. 38793200 | -3. 58259700 | 2. 45013500  |
| H | -1. 91786200 | -4. 99221600 | 1. 68547700  |
| H | -4. 57788000 | -2. 02868700 | 3. 31259600  |
| H | -3. 66927900 | -0. 06835100 | 4. 43421500  |
| H | -4. 23642500 | -4. 16374700 | 2. 10210200  |
| C | -0. 85676100 | 0. 41448300  | -4. 32939500 |
| H | -1. 65277300 | -0. 32266600 | -4. 37396600 |
| C | 0. 36011600  | 0. 08342100  | -3. 79361100 |
| H | 0. 53005000  | -0. 92217900 | -3. 42529400 |
| C | -1. 10313000 | 1. 73055900  | -4. 81661200 |



|   |             |            |             |
|---|-------------|------------|-------------|
| H | -2.07737200 | 1.97033600 | -5.23254100 |
| C | -0.11712300 | 2.67823400 | -4.75588700 |
| H | -0.28901700 | 3.68430200 | -5.13216100 |
| C | 0.60275300  | 1.93623100 | 5.51960700  |
| H | 1.43860500  | 2.55045800 | 5.84120800  |
| C | -0.72964000 | 2.35810900 | 5.79333800  |
| H | -0.90150700 | 3.28367000 | 6.33609900  |
| C | -1.78589300 | 1.59475600 | 5.37298100  |
| H | -2.80907100 | 1.90260900 | 5.57588100  |
| C | 0.84366800  | 0.76920000 | 4.84132000  |
| H | 1.86535700  | 0.46792800 | 4.64224000  |
| N | 1.75633400  | 1.30961300 | 1.47656200  |
| S | 3.21071000  | 1.77729300 | 2.19395800  |
| C | 4.23977400  | 2.54114900 | 0.79446800  |
| O | 3.94915300  | 0.60673700 | 2.64004500  |
| O | 2.86722200  | 2.88641800 | 3.07553400  |
| F | 3.44601100  | 2.98372600 | -0.17824200 |
| F | 4.91527200  | 3.56375400 | 1.31720400  |
| F | 5.09226900  | 1.63880800 | 0.32651700  |
| H | -6.20212200 | 4.09459100 | 0.15656400  |
| H | -5.76807800 | 1.07667700 | 0.38424500  |
| C | -1.81677500 | 4.01356200 | 0.08842700  |
| C | -1.45464500 | 3.85863400 | 1.43538100  |
| C | -0.80813900 | 4.42672400 | -0.80370100 |
| C | -0.15834200 | 4.14548600 | 1.88055300  |
| H | -2.18186800 | 3.52254700 | 2.16492900  |
| C | 0.48598600  | 4.70550500 | -0.37054600 |
| H | -1.03267900 | 4.53380700 | -1.86096300 |
| C | 0.81568800  | 4.58286700 | 0.98125600  |
| H | 0.08274100  | 4.03377100 | 2.93460600  |
| H | 1.23809200  | 5.01582700 | -1.09068100 |
| H | 1.81682900  | 4.81515500 | 1.33110900  |
| C | -3.78607400 | 5.12144100 | -1.04959800 |
| H | -3.10568400 | 5.41492100 | -1.86156800 |
| H | -4.75644200 | 4.92710200 | -1.52129700 |
| C | -3.91409800 | 6.26434200 | -0.07905700 |
| H | -3.01208200 | 6.53151100 | 0.47370700  |
| C | -5.02959900 | 6.97079900 | 0.12854400  |
| H | -5.93106600 | 6.70748600 | -0.42887100 |
| C | -7.76052000 | 1.86166100 | -0.14758200 |
| H | -7.87102100 | 1.26856600 | -1.06478500 |
| H | -8.31961200 | 1.33498200 | 0.63808200  |
| H | -8.23728400 | 2.83486900 | -0.30895700 |
| C | -5.15583900 | 8.13177300 | 1.07355800  |

|   |             |            |            |
|---|-------------|------------|------------|
| H | -5.45075900 | 9.04743300 | 0.54293000 |
| H | -5.92946200 | 7.94706200 | 1.83125900 |
| H | -4.21270300 | 8.33128900 | 1.59360300 |

INT-13-2

0 imaginary frequency

H = -5315.394607

G = -5315.598647

E(M06-2X-DCM) = -5316.278474

E(M06-2X-cyclohexane) = -5316.253691

|   |             |             |             |
|---|-------------|-------------|-------------|
| C | -1.72564700 | 4.71223000  | -0.35513100 |
| C | -2.79182700 | 4.57991100  | 0.77521900  |
| H | -2.80837200 | 3.53869200  | 1.11771800  |
| H | -2.46241800 | 5.18792100  | 1.62742100  |
| C | -4.19116400 | 5.00031300  | 0.40527500  |
| C | -2.09423400 | 3.76143100  | -1.52908700 |
| H | -1.42785900 | 3.94309500  | -2.38307500 |
| H | -3.11201800 | 3.97006800  | -1.86016500 |
| N | -2.04252700 | 2.35228400  | -1.16716400 |
| C | -2.91692900 | 1.40726900  | -1.60073300 |
| N | -2.54125000 | 0.13734700  | -1.20561900 |
| C | -3.22859600 | -1.07825900 | -1.31577700 |
| C | -4.62887800 | -1.18799700 | -1.28721700 |
| C | -2.46043600 | -2.25037000 | -1.38184300 |
| C | -5.22757300 | -2.44367200 | -1.35513200 |
| C | -3.07922200 | -3.49869800 | -1.44091000 |
| H | -1.37742900 | -2.18372800 | -1.38177000 |
| C | -4.46780500 | -3.61109300 | -1.44164000 |
| H | -4.94654800 | -4.58062200 | -1.50629400 |
| C | -2.23631200 | -4.74061600 | -1.41959600 |
| C | -6.72415100 | -2.55683200 | -1.23220800 |
| F | -2.85558000 | -5.79606200 | -1.98460800 |
| F | -1.92612400 | -5.11080500 | -0.14343200 |
| F | -1.05530300 | -4.57082800 | -2.06098000 |
| F | -7.20842700 | -3.60189900 | -1.93945700 |
| F | -7.36187300 | -1.44762800 | -1.65016100 |
| F | -7.09687400 | -2.76204300 | 0.06059700  |
| S | -4.27688600 | 1.74889400  | -2.54267500 |
| H | -5.23663600 | -0.29804300 | -1.21893300 |
| C | -5.23227100 | 4.17115000  | 0.28748600  |
| H | -1.57887400 | 0.05059500  | -0.87624400 |
| H | -1.17291600 | 2.02669300  | -0.75103000 |
| H | 1.67374500  | 1.51709200  | 1.56945300  |
| O | 0.51298200  | -1.62662200 | 0.99630100  |

|   |             |              |              |
|---|-------------|--------------|--------------|
| O | 2. 59928800 | -1. 00427800 | -0. 39585200 |
| P | 1. 29554900 | -0. 39142500 | 0. 32178600  |
| O | 0. 32642600 | 0. 40145200  | -0. 47319300 |
| C | 2. 36081400 | -3. 74655100 | 4. 09321900  |
| C | 2. 72709500 | -3. 97903600 | 2. 77257000  |
| C | 2. 02969500 | -3. 36867400 | 1. 71739700  |
| C | 0. 64341700 | -2. 17589900 | 3. 34652700  |
| C | 1. 29574600 | -2. 88650100 | 4. 36614300  |
| C | 2. 47507600 | -2. 01212100 | -1. 37940200 |
| C | 2. 34678700 | -3. 33849400 | -0. 97456100 |
| C | 2. 13193200 | -4. 31633000 | -1. 96170500 |
| C | 2. 12800800 | -3. 98327600 | -3. 31140200 |
| C | 2. 33436700 | -2. 65692900 | -3. 68760800 |
| C | 2. 49929100 | -1. 63825800 | -2. 73617400 |
| H | 0. 97505900 | -2. 72849500 | 5. 39150500  |
| H | 2. 35010400 | -2. 38515600 | -4. 73884900 |
| C | 2. 45837300 | -4. 00404400 | 0. 39691800  |
| C | 3. 93174900 | -4. 39119000 | 0. 75161000  |
| H | 4. 32965700 | -5. 16759300 | 0. 09078100  |
| H | 4. 56498300 | -3. 50219700 | 0. 65290200  |
| H | 1. 06074200 | -6. 20074200 | -1. 79759100 |
| H | 2. 78402800 | -6. 31213300 | -1. 43475500 |
| C | 1. 07366300 | -2. 40944000 | 2. 02685800  |
| H | 2. 89234500 | -4. 22942700 | 4. 90912400  |
| H | 1. 96183400 | -4. 74557800 | -4. 06791800 |
| C | 3. 86460200 | -4. 82171500 | 2. 23541400  |
| H | 3. 65565700 | -5. 89564900 | 2. 33427400  |
| H | 4. 80239200 | -4. 63214700 | 2. 76912400  |
| C | 1. 89796900 | -5. 67010200 | -1. 33352600 |
| C | 1. 62333400 | -5. 30715500 | 0. 13844600  |
| H | 1. 87921400 | -6. 10700600 | 0. 83904400  |
| H | 0. 56015000 | -5. 08191000 | 0. 26320400  |
| C | 2. 71808800 | -0. 22963700 | -3. 19921600 |
| C | 4. 02796400 | 0. 30746800  | -3. 19505700 |
| C | 1. 63742400 | 0. 52385100  | -3. 71523500 |
| C | 5. 17247000 | -0. 44102000 | -2. 77178300 |
| C | 4. 24678500 | 1. 65614400  | -3. 66609200 |
| C | 1. 87296800 | 1. 86756800  | -4. 19557200 |
| C | 6. 42942900 | 0. 10575300  | -2. 78803700 |
| H | 5. 03500600 | -1. 46366300 | -2. 43797600 |
| C | 5. 57183300 | 2. 19354700  | -3. 65352600 |
| C | 3. 16392100 | 2. 39976400  | -4. 14442100 |
| C | 6. 63531500 | 1. 44466500  | -3. 22651700 |
| H | 7. 28062500 | -0. 48783400 | -2. 46538000 |

|   |             |             |             |
|---|-------------|-------------|-------------|
| H | 5.71656800  | 3.21274700  | -4.00434300 |
| H | 3.33486800  | 3.41176300  | -4.50679800 |
| H | 7.63829900  | 1.86250300  | -3.22890100 |
| C | -0.48182400 | -1.24069300 | 3.66442800  |
| C | -1.79939600 | -1.57282400 | 3.25874000  |
| C | -0.24138000 | -0.05577400 | 4.40357200  |
| C | -2.11939000 | -2.78209800 | 2.56260600  |
| C | -2.88975100 | -0.67546200 | 3.56856200  |
| C | -1.34437200 | 0.82847500  | 4.71154500  |
| C | -3.40392300 | -3.06811500 | 2.18070400  |
| H | -1.32848500 | -3.48803600 | 2.33657600  |
| C | -4.21369900 | -1.00605600 | 3.14019300  |
| C | -2.63187500 | 0.49875300  | 4.28091000  |
| C | -4.46899600 | -2.16549600 | 2.45938800  |
| H | -3.60780500 | -3.99064800 | 1.64689400  |
| H | -5.01597600 | -0.30829600 | 3.36827500  |
| H | -3.45630900 | 1.17088300  | 4.51064500  |
| H | -5.47238200 | -2.39696400 | 2.11524400  |
| C | -0.71970700 | 0.76631200  | -4.31704900 |
| H | -1.72680900 | 0.36293600  | -4.36249600 |
| C | 0.30085900  | 0.01480100  | -3.79628100 |
| H | 0.10167000  | -0.99000000 | -3.44071100 |
| C | -0.48153300 | 2.09010300  | -4.78713600 |
| H | -1.30747800 | 2.66790700  | -5.19160600 |
| C | 0.77827100  | 2.62200100  | -4.72427500 |
| H | 0.97562300  | 3.62830900  | -5.08717600 |
| C | 1.25976100  | 1.49119800  | 5.56026100  |
| H | 2.26299300  | 1.75906000  | 5.87824400  |
| C | 0.16891000  | 2.35470200  | 5.86429300  |
| H | 0.34447100  | 3.26803000  | 6.42624700  |
| C | -1.09427400 | 2.02889900  | 5.44812700  |
| H | -1.93778500 | 2.67734600  | 5.67365600  |
| C | 1.06114200  | 0.33087400  | 4.85725600  |
| H | 1.90577400  | -0.31063300 | 4.63539400  |
| N | 2.07241100  | 0.57714200  | 1.47499800  |
| S | 3.60000100  | 0.48106000  | 2.18640000  |
| C | 4.83092200  | 0.84542500  | 0.78930600  |
| O | 3.86998500  | -0.88327600 | 2.61111400  |
| O | 3.68091700  | 1.62609500  | 3.08496000  |
| F | 5.83357700  | 1.54277200  | 1.32192900  |
| F | 5.29627500  | -0.29559800 | 0.29753300  |
| F | 4.24833000  | 1.56444900  | -0.16752600 |
| H | -4.35765100 | 6.06721500  | 0.24613300  |
| H | -5.07351000 | 3.10338400  | 0.44119600  |

|   |             |             |             |
|---|-------------|-------------|-------------|
| C | -0.30553800 | 4.40345300  | 0.16193100  |
| C | -0.02262600 | 4.10800200  | 1.50357200  |
| C | 0.78310900  | 4.43773300  | -0.73050700 |
| C | 1.29019500  | 3.90307700  | 1.94526000  |
| H | -0.82098000 | 4.04384000  | 2.23336600  |
| C | 2.09132800  | 4.22714300  | -0.30154200 |
| H | 0.61132200  | 4.63225500  | -1.78522300 |
| C | 2.35599400  | 3.97521700  | 1.04667000  |
| H | 1.47545300  | 3.69604700  | 2.99623100  |
| H | 2.90418700  | 4.25605800  | -1.02205200 |
| H | 3.37401500  | 3.82807500  | 1.39399600  |
| C | -1.74359000 | 6.16104300  | -0.95450600 |
| H | -0.99725100 | 6.22229100  | -1.75460500 |
| H | -2.72082800 | 6.30466200  | -1.43577900 |
| C | -1.50266500 | 7.27275500  | 0.03086700  |
| H | -2.27406500 | 7.43517600  | 0.78543500  |
| C | -0.43149300 | 8.07117900  | 0.03556800  |
| H | 0.34292800  | 7.91422500  | -0.71758600 |
| C | -6.63125700 | 4.58049500  | -0.06926200 |
| H | -6.71202100 | 5.66313600  | -0.21676500 |
| H | -6.95525600 | 4.08273500  | -0.99251500 |
| H | -7.34501100 | 4.28913400  | 0.71353000  |
| C | -0.18912700 | 9.19077900  | 1.00663100  |
| H | -1.00909600 | 9.28407400  | 1.72696100  |
| H | 0.74095700  | 9.03336300  | 1.56955300  |
| H | -0.08207300 | 10.15333900 | 0.48797600  |

INT-13-3

0 imaginary frequency

H = -5315.392945

G = -5315.597795

E(M06-2X-DCM) = -5316.276035

E(M06-2X-cyclohexane) = -5316.251170

|   |            |             |             |
|---|------------|-------------|-------------|
| C | 4.34856800 | -2.24128200 | 0.37237900  |
| C | 5.39142500 | -3.05512500 | 1.21345100  |
| H | 4.92459500 | -3.34172300 | 2.16504900  |
| H | 5.60277400 | -3.98920100 | 0.68125100  |
| C | 6.68825000 | -2.35119500 | 1.52337900  |
| C | 3.97916300 | -0.96125800 | 1.17699700  |
| H | 4.86699000 | -0.35319900 | 1.35031100  |
| H | 3.57537000 | -1.25068800 | 2.15790900  |
| N | 3.02152700 | -0.10238400 | 0.50086800  |
| C | 3.14226100 | 1.24453300  | 0.36814400  |
| N | 2.00727700 | 1.80751100  | -0.18001800 |

|   |              |              |              |
|---|--------------|--------------|--------------|
| C | 1. 72978700  | 3. 15927800  | -0. 43827700 |
| C | 2. 66986400  | 4. 04664900  | -0. 98668100 |
| C | 0. 42764100  | 3. 61352000  | -0. 19104500 |
| C | 2. 30368100  | 5. 36481500  | -1. 25271600 |
| C | 0. 07717600  | 4. 93545800  | -0. 47178500 |
| H | -0. 29726500 | 2. 93988900  | 0. 25457100  |
| C | 1. 01008900  | 5. 82518100  | -0. 99937800 |
| H | 0. 73808100  | 6. 85153300  | -1. 21173600 |
| C | -1. 33488100 | 5. 38167800  | -0. 21990000 |
| C | 3. 33665600  | 6. 32493200  | -1. 78379200 |
| F | -1. 81621700 | 4. 89421700  | 0. 95560700  |
| F | -2. 18340600 | 4. 94168100  | -1. 18520300 |
| F | -1. 45475300 | 6. 72265500  | -0. 17375300 |
| F | 3. 99135400  | 6. 95705600  | -0. 78437400 |
| F | 2. 77408000  | 7. 28653700  | -2. 55267100 |
| F | 4. 26804300  | 5. 69978500  | -2. 53489700 |
| S | 4. 50896800  | 2. 11975100  | 0. 83321200  |
| H | 3. 67333200  | 3. 70476100  | -1. 19586600 |
| C | 7. 89869900  | -2. 79262200 | 1. 16880500  |
| H | 1. 20177400  | 1. 18600100  | -0. 25705800 |
| H | 2. 13710000  | -0. 52423800 | 0. 22745000  |
| H | -0. 52977700 | -2. 64832800 | 1. 02768300  |
| O | -1. 64857500 | 0. 56888600  | 1. 19506200  |
| O | -2. 58760800 | -0. 77877200 | -0. 79327200 |
| P | -1. 32041800 | -0. 64545700 | 0. 18899000  |
| O | 0. 03383900  | -0. 43330100 | -0. 37744200 |
| C | -4. 83783500 | 0. 17339600  | 3. 86885600  |
| C | -5. 08011300 | 0. 48942900  | 2. 53671800  |
| C | -4. 01622000 | 0. 74848900  | 1. 65748000  |
| C | -2. 43041600 | 0. 25285000  | 3. 45749800  |
| C | -3. 52092200 | 0. 10389500  | 4. 32809800  |
| C | -3. 01349600 | 0. 32247100  | -1. 57065400 |
| C | -3. 85003200 | 1. 27491900  | -0. 99482200 |
| C | -4. 18801100 | 2. 40790300  | -1. 75618100 |
| C | -3. 76319600 | 2. 53917100  | -3. 07340100 |
| C | -2. 98630300 | 1. 53186000  | -3. 64414900 |
| C | -2. 58205800 | 0. 40804700  | -2. 90735500 |
| H | -3. 32162200 | -0. 10083200 | 5. 37574100  |
| H | -2. 66095000 | 1. 61406200  | -4. 67694600 |
| C | -4. 56493300 | 1. 32661200  | 0. 35561000  |
| C | -5. 96312500 | 0. 62613600  | 0. 32069600  |
| H | -6. 67532400 | 1. 14694000  | -0. 32679900 |
| H | -5. 83831800 | -0. 39352900 | -0. 06112900 |
| H | -4. 67100000 | 4. 41583100  | -1. 07630500 |

|   |             |             |             |
|---|-------------|-------------|-------------|
| H | -6.06334900 | 3.33865100  | -1.20620800 |
| C | -2.72186800 | 0.52810300  | 2.10875900  |
| H | -5.66185500 | -0.01458700 | 4.55226300  |
| H | -4.02732000 | 3.41936800  | -3.65332000 |
| C | -6.40193100 | 0.57800100  | 1.80325000  |
| H | -6.96316500 | 1.47893200  | 2.08634700  |
| H | -7.04961600 | -0.27850300 | 2.02030400  |
| C | -4.99943700 | 3.38212800  | -0.93455600 |
| C | -4.75905300 | 2.87703900  | 0.50084600  |
| H | -5.56593100 | 3.13018000  | 1.19437900  |
| H | -3.83460700 | 3.31840500  | 0.88693800  |
| C | -1.74636000 | -0.64763800 | -3.56572000 |
| C | -2.36060500 | -1.84425200 | -4.00692800 |
| C | -0.37138100 | -0.41781700 | -3.80725200 |
| C | -3.76308000 | -2.09435200 | -3.86493100 |
| C | -1.56194600 | -2.85757800 | -4.65814500 |
| C | 0.41456300  | -1.43678000 | -4.46715100 |
| C | -4.32870300 | -3.26106300 | -4.30968800 |
| H | -4.38538900 | -1.33749200 | -3.40018300 |
| C | -2.18903800 | -4.06563800 | -5.09655900 |
| C | -0.19770200 | -2.62945900 | -4.86253500 |
| C | -3.53257300 | -4.26676500 | -4.92807200 |
| H | -5.39710500 | -3.42194100 | -4.19306900 |
| H | -1.57139800 | -4.82010300 | -5.57817500 |
| H | 0.39859500  | -3.39185000 | -5.36031400 |
| H | -3.99796300 | -5.18658000 | -5.27138700 |
| C | -1.02118300 | 0.16140300  | 3.95311900  |
| C | -0.20830700 | 1.32369100  | 3.94826900  |
| C | -0.50937600 | -1.06481900 | 4.44485500  |
| C | -0.68110100 | 2.60409500  | 3.51564700  |
| C | 1.15931300  | 1.24034500  | 4.40797900  |
| C | 0.85742600  | -1.12844500 | 4.91539200  |
| C | 0.13773100  | 3.70362300  | 3.50820500  |
| H | -1.71146800 | 2.70547400  | 3.19407800  |
| C | 1.98295200  | 2.40880600  | 4.37625800  |
| C | 1.65322700  | 0.01949100  | 4.87638500  |
| C | 1.49200800  | 3.60729100  | 3.93501200  |
| H | -0.25090000 | 4.65629900  | 3.16115200  |
| H | 3.01567200  | 2.31993700  | 4.70258800  |
| H | 2.68307300  | -0.03605000 | 5.22333400  |
| H | 2.13141800  | 4.48444300  | 3.90482300  |
| C | 1.62476500  | 0.98705500  | -3.69057200 |
| H | 2.10192500  | 1.91725800  | -3.39655300 |
| C | 0.29342200  | 0.79360800  | -3.43081700 |

|   |             |             |             |
|---|-------------|-------------|-------------|
| H | -0.27540600 | 1.57057400  | -2.93218600 |
| C | 2.39538400  | -0.02207200 | -4.33632700 |
| H | 3.45011900  | 0.14968600  | -4.53186100 |
| C | 1.80423300  | -1.19902500 | -4.70994600 |
| H | 2.37965200  | -1.97494600 | -5.20955000 |
| C | -0.74657300 | -3.44545700 | 4.95487200  |
| H | -1.35418800 | -4.34558800 | 4.95809700  |
| C | 0.59584600  | -3.49885200 | 5.42712600  |
| H | 0.99791500  | -4.43532600 | 5.80422200  |
| C | 1.37151200  | -2.37075600 | 5.40437500  |
| H | 2.39810800  | -2.39526900 | 5.76289600  |
| C | -1.27824800 | -2.27303300 | 4.48329200  |
| H | -2.30158100 | -2.25533500 | 4.12697100  |
| N | -1.42562000 | -2.15773000 | 0.94763100  |
| S | -2.72089700 | -3.20988000 | 1.20704500  |
| C | -3.22960700 | -3.82293000 | -0.51475500 |
| O | -3.86599300 | -2.47673600 | 1.72257200  |
| O | -2.14524000 | -4.36840900 | 1.87837200  |
| F | -4.24269500 | -3.09624200 | -0.96896700 |
| F | -2.19714600 | -3.75982600 | -1.35353200 |
| F | -3.61647700 | -5.09048800 | -0.38000200 |
| H | 6.62622700  | -1.43674800 | 2.11515600  |
| H | 7.97087300  | -3.70941900 | 0.58153100  |
| C | 3.06904500  | -3.08728000 | 0.18957300  |
| C | 2.45977100  | -3.69645900 | 1.30312700  |
| C | 2.42725600  | -3.24135200 | -1.05060800 |
| C | 1.29830600  | -4.46032100 | 1.17890700  |
| H | 2.88722200  | -3.57656900 | 2.29373400  |
| C | 1.26539100  | -4.00568900 | -1.18425800 |
| H | 2.82292200  | -2.75707500 | -1.93540500 |
| C | 0.70222100  | -4.63366100 | -0.07421800 |
| H | 0.85822600  | -4.91851400 | 2.06030300  |
| H | 0.79766700  | -4.09720400 | -2.16065700 |
| H | -0.19364000 | -5.23877100 | -0.17439700 |
| C | 4.99690000  | -1.80710000 | -0.97331800 |
| H | 4.25785200  | -1.22947900 | -1.54508400 |
| H | 5.80288400  | -1.10289200 | -0.74034500 |
| C | 5.55491500  | -2.91873600 | -1.82726000 |
| H | 4.89824400  | -3.76379900 | -2.03724300 |
| C | 6.78167700  | -2.92444200 | -2.35783600 |
| H | 7.44895000  | -2.08675100 | -2.14765500 |
| C | 9.19818000  | -2.12417600 | 1.51592100  |
| H | 9.03856300  | -1.20899900 | 2.09601000  |
| H | 9.84546600  | -2.79052200 | 2.10269200  |



|   |            |             |             |
|---|------------|-------------|-------------|
| H | 9.76249100 | -1.85776800 | 0.61178200  |
| C | 7.33551000 | -4.00420200 | -3.24384800 |
| H | 7.61693800 | -3.60755400 | -4.22919700 |
| H | 8.24572200 | -4.44606300 | -2.81544700 |
| H | 6.60957900 | -4.80999000 | -3.39910200 |

INT-13-4

0 imaginary frequency

H = -5315.390930

G = -5315.597172

E(M06-2X-DCM) = -5316.272599

E(M06-2X-cyclohexane) = -5316.246306

|   |             |             |             |
|---|-------------|-------------|-------------|
| C | -3.26419200 | 3.92452900  | 1.13812100  |
| C | -3.79372600 | 3.02440200  | 2.30853500  |
| H | -3.17754300 | 2.11907600  | 2.35298900  |
| H | -3.62137400 | 3.55908200  | 3.25092100  |
| C | -5.24670500 | 2.63311500  | 2.24133700  |
| C | -3.50776700 | 3.21020000  | -0.21326400 |
| H | -3.15010200 | 3.83078800  | -1.04320800 |
| H | -4.58124800 | 3.08138900  | -0.35554800 |
| N | -2.91957100 | 1.87583200  | -0.29000800 |
| C | -3.47393000 | 0.82361700  | -0.94092000 |
| N | -2.65715500 | -0.29477400 | -0.91337800 |
| C | -2.95515200 | -1.61506600 | -1.27006300 |
| C | -4.23010800 | -2.18608400 | -1.11615900 |
| C | -1.90367200 | -2.42309600 | -1.72666700 |
| C | -4.43627600 | -3.52353100 | -1.44302400 |
| C | -2.12977400 | -3.76293400 | -2.04334700 |
| H | -0.91002000 | -2.00089000 | -1.83326200 |
| C | -3.39770200 | -4.32607600 | -1.91858600 |
| H | -3.57448900 | -5.36131200 | -2.18428800 |
| C | -0.97539500 | -4.63060900 | -2.45139000 |
| C | -5.78048200 | -4.15172900 | -1.18765700 |
| F | -0.03112800 | -3.94198500 | -3.13569100 |
| F | -1.35521100 | -5.67022500 | -3.22052400 |
| F | -0.34356300 | -5.16539400 | -1.36502300 |
| F | -6.78189600 | -3.25270800 | -1.19577900 |
| F | -5.81277200 | -4.76605900 | 0.02741100  |
| F | -6.07238800 | -5.10286900 | -2.10233900 |
| S | -4.96657100 | 0.88762900  | -1.72711100 |
| H | -5.04818600 | -1.58332000 | -0.75013500 |
| C | -5.69327000 | 1.38394100  | 2.08251600  |
| H | -1.67367000 | -0.12256100 | -0.69894600 |
| H | -1.97077200 | 1.76754000  | 0.05631300  |

|   |             |              |              |
|---|-------------|--------------|--------------|
| H | 1. 62267400 | 0. 44599700  | 2. 47834800  |
| O | 1. 15686500 | -1. 62069500 | 0. 53283200  |
| O | 2. 70828600 | 0. 02469500  | -0. 75002700 |
| P | 1. 40715400 | -0. 06257700 | 0. 18585000  |
| O | 0. 13583300 | 0. 51806400  | -0. 30515300 |
| C | 4. 13854500 | -3. 71387200 | 2. 59038900  |
| C | 4. 28296100 | -3. 45305600 | 1. 23179800  |
| C | 3. 24431700 | -2. 85288800 | 0. 49883800  |
| C | 1. 92720900 | -2. 67664100 | 2. 55711400  |
| C | 2. 94910800 | -3. 36306000 | 3. 23143400  |
| C | 2. 70618600 | -0. 62051400 | -2. 00618100 |
| C | 3. 02192000 | -1. 97583800 | -2. 05369900 |
| C | 2. 91202600 | -2. 64414300 | -3. 28418100 |
| C | 2. 58250800 | -1. 95030900 | -4. 44381200 |
| C | 2. 35810900 | -0. 57560000 | -4. 37719200 |
| C | 2. 40020900 | 0. 12227500  | -3. 15899800 |
| H | 2. 81025200 | -3. 59406700 | 4. 28336800  |
| H | 2. 12331500 | -0. 01888400 | -5. 27939500 |
| C | 3. 56750600 | -2. 92948100 | -0. 99273900 |
| C | 5. 13108100 | -2. 90680900 | -0. 93193600 |
| H | 5. 58856600 | -3. 30784000 | -1. 84123400 |
| H | 5. 46678100 | -1. 87108500 | -0. 81230900 |
| H | 2. 43924500 | -4. 73604400 | -3. 64536600 |
| H | 4. 16461800 | -4. 39798300 | -3. 50096900 |
| C | 2. 12706500 | -2. 39763800 | 1. 19167700  |
| H | 4. 93779600 | -4. 19235900 | 3. 15051200  |
| H | 2. 50067100 | -2. 47023200 | -5. 39464500 |
| C | 5. 47690000 | -3. 71582800 | 0. 33860200  |
| H | 5. 58356500 | -4. 78650700 | 0. 11792000  |
| H | 6. 41800400 | -3. 39530700 | 0. 79960900  |
| C | 3. 17361600 | -4. 12302700 | -3. 11383900 |
| C | 3. 09062300 | -4. 30159600 | -1. 58402400 |
| H | 3. 68507500 | -5. 14110800 | -1. 21182400 |
| H | 2. 05029400 | -4. 47498900 | -1. 29487500 |
| C | 2. 15848200 | 1. 59858500  | -3. 13645200 |
| C | 3. 24792400 | 2. 47829400  | -2. 92641900 |
| C | 0. 86222500 | 2. 10664900  | -3. 39107700 |
| C | 4. 58806100 | 2. 02266600  | -2. 71082700 |
| C | 3. 02360800 | 3. 90535800  | -2. 95453400 |
| C | 0. 65503300 | 3. 53721000  | -3. 42366200 |
| C | 5. 61932500 | 2. 90412000  | -2. 51859000 |
| H | 4. 78680500 | 0. 95658700  | -2. 70907600 |
| C | 4. 12639700 | 4. 79072000  | -2. 74329900 |
| C | 1. 73706600 | 4. 39369400  | -3. 20134100 |

|   |             |             |             |
|---|-------------|-------------|-------------|
| C | 5.38897100  | 4.30893300  | -2.52875000 |
| H | 6.62706800  | 2.52945700  | -2.35939300 |
| H | 3.93637200  | 5.86127100  | -2.76156500 |
| H | 1.57459000  | 5.46942000  | -3.22645300 |
| H | 6.21891800  | 4.99219600  | -2.37107000 |
| C | 0.67260300  | -2.27439900 | 3.26864000  |
| C | -0.55873400 | -2.88644800 | 2.92087900  |
| C | 0.72036900  | -1.30637400 | 4.30420200  |
| C | -0.67095400 | -3.89207200 | 1.90887500  |
| C | -1.76839700 | -2.49945000 | 3.61155100  |
| C | -0.49769700 | -0.94105000 | 4.99561300  |
| C | -1.88207600 | -4.44390200 | 1.58295900  |
| H | 0.21971100  | -4.22107900 | 1.38635700  |
| C | -3.01288500 | -3.09581500 | 3.23584400  |
| C | -1.70331300 | -1.54382700 | 4.62904200  |
| C | -3.07543700 | -4.03563500 | 2.24302000  |
| H | -1.93163700 | -5.19323100 | 0.79985500  |
| H | -3.91265200 | -2.77698000 | 3.75646600  |
| H | -2.61682800 | -1.25729500 | 5.14590800  |
| H | -4.02733700 | -4.46136900 | 1.94093400  |
| C | -1.51937600 | 1.79358000  | -3.85148000 |
| H | -2.37168700 | 1.13667600  | -3.99805500 |
| C | -0.27760600 | 1.26638100  | -3.60961600 |
| H | -0.14927200 | 0.19039000  | -3.57557000 |
| C | -1.71498400 | 3.20432900  | -3.89042700 |
| H | -2.70834200 | 3.60026900  | -4.08051400 |
| C | -0.65679000 | 4.04752700  | -3.68092100 |
| H | -0.79290800 | 5.12618900  | -3.70422600 |
| C | 1.92753900  | 0.31487900  | 5.68783200  |
| H | 2.85447300  | 0.81781700  | 5.94651500  |
| C | 0.72842500  | 0.65524900  | 6.37348200  |
| H | 0.75081600  | 1.40640800  | 7.15763500  |
| C | -0.44655900 | 0.04107900  | 6.03330800  |
| H | -1.37287200 | 0.29602800  | 6.54245200  |
| C | 1.92642800  | -0.63437500 | 4.69667600  |
| H | 2.85531000  | -0.88187500 | 4.19560700  |
| N | 2.09437700  | 0.61443400  | 1.58726100  |
| S | 3.30287100  | 1.78307400  | 1.74263100  |
| C | 4.89177100  | 0.76935700  | 1.72235900  |
| O | 3.18966100  | 2.28233300  | 3.10603400  |
| O | 3.35373600  | 2.63953000  | 0.57240800  |
| F | 5.85483000  | 1.53627900  | 2.23126800  |
| F | 4.74964000  | -0.32360400 | 2.47766400  |
| F | 5.22006800  | 0.41182400  | 0.48336800  |

|   |             |            |             |
|---|-------------|------------|-------------|
| H | -5.97883500 | 3.43465200 | 2.35187400  |
| H | -4.96519700 | 0.57817600 | 1.97439400  |
| C | -1.78085200 | 4.26331300 | 1.38894800  |
| C | -1.37776500 | 4.78699200 | 2.63152900  |
| C | -0.79074300 | 4.11937800 | 0.40430100  |
| C | -0.05097700 | 5.12870000 | 2.88541900  |
| H | -2.10938600 | 4.94063100 | 3.41929600  |
| C | 0.54260700  | 4.45773900 | 0.65454500  |
| H | -1.04126200 | 3.74646200 | -0.58307800 |
| C | 0.92114300  | 4.95908500 | 1.89807100  |
| H | 0.22311400  | 5.52656500 | 3.85932300  |
| H | 1.28351300  | 4.31826900 | -0.12612400 |
| H | 1.95894100  | 5.21071200 | 2.09581300  |
| C | -4.08675900 | 5.25860800 | 1.10126700  |
| H | -5.14542100 | 5.01673600 | 0.95179700  |
| H | -4.00620900 | 5.71932400 | 2.09679200  |
| C | -3.65892300 | 6.25896600 | 0.06061300  |
| H | -2.63332200 | 6.62300000 | 0.13212800  |
| C | -4.44653900 | 6.73076000 | -0.91088300 |
| H | -5.47267000 | 6.36412200 | -0.98165400 |
| C | -7.13695100 | 0.97932000 | 2.01690100  |
| H | -7.36363100 | 0.51754800 | 1.04697500  |
| H | -7.38238300 | 0.23702300 | 2.78894800  |
| H | -7.80337100 | 1.83886500 | 2.14807800  |
| C | -4.03948400 | 7.74988200 | -1.93685800 |
| H | -4.14820500 | 7.35499000 | -2.95630200 |
| H | -4.67193900 | 8.64660200 | -1.88130700 |
| H | -2.99817400 | 8.06233600 | -1.80240000 |

INT-13-5

0 imaginary frequency

H = -5315.389046

G = -5315.595688

E(M06-2X-DCM) = -5316.271961

E(M06-2X-cyclohexane) = -5316.245073

|   |             |            |             |
|---|-------------|------------|-------------|
| C | -1.96034900 | 4.75083300 | 0.81566400  |
| C | -2.72590000 | 4.10155400 | 2.02222500  |
| H | -2.38250200 | 3.06656000 | 2.13173000  |
| H | -2.41765600 | 4.62411400 | 2.93641500  |
| C | -4.23014800 | 4.11907900 | 1.94666200  |
| C | -2.40207900 | 4.06615100 | -0.50078400 |
| H | -1.86615400 | 4.49428600 | -1.35628300 |
| H | -3.46409400 | 4.25595300 | -0.66077600 |
| N | -2.24058700 | 2.61539400 | -0.49495200 |

|   |             |             |             |
|---|-------------|-------------|-------------|
| C | -3.07974900 | 1.74479500  | -1.10905300 |
| N | -2.63933000 | 0.43619100  | -1.00505000 |
| C | -3.31590800 | -0.75194700 | -1.30467200 |
| C | -4.70645800 | -0.90374600 | -1.16877300 |
| C | -2.54850700 | -1.86424900 | -1.68036300 |
| C | -5.30000100 | -2.13481800 | -1.43394900 |
| C | -3.16194900 | -3.09108100 | -1.93524100 |
| H | -1.47179500 | -1.76719900 | -1.77157700 |
| C | -4.54291700 | -3.23925300 | -1.82854300 |
| H | -5.01841100 | -4.18791300 | -2.04646100 |
| C | -2.31497600 | -4.28846100 | -2.25311000 |
| C | -6.77596900 | -2.31364800 | -1.19651200 |
| F | -1.19470100 | -3.95847600 | -2.93887200 |
| F | -2.97581800 | -5.21278900 | -2.97802600 |
| F | -1.89375900 | -4.91819400 | -1.11689000 |
| F | -7.32305900 | -3.18752100 | -2.07029000 |
| F | -7.45882400 | -1.15770300 | -1.28940100 |
| F | -7.01622200 | -2.81409400 | 0.04707600  |
| S | -4.47435700 | 2.21385500  | -1.93678100 |
| H | -5.31172500 | -0.06261200 | -0.86446100 |
| C | -5.00156400 | 3.03185800  | 1.85622500  |
| H | -1.65290100 | 0.31737700  | -0.76890400 |
| H | -1.36715400 | 2.24888300  | -0.12746900 |
| H | 1.61288500  | 0.12198300  | 2.46427500  |
| O | 0.57387100  | -1.84626000 | 0.63151300  |
| O | 2.56934500  | -0.83373100 | -0.69093300 |
| P | 1.28944100  | -0.46213600 | 0.20319600  |
| O | 0.25948900  | 0.43901000  | -0.36446800 |
| C | 2.74647100  | -4.58817700 | 2.92556300  |
| C | 2.98828300  | -4.47764800 | 1.56025300  |
| C | 2.19244100  | -3.64674200 | 0.75256500  |
| C | 0.95051100  | -2.94265200 | 2.74360300  |
| C | 1.70556300  | -3.85437800 | 3.49759000  |
| C | 2.39231400  | -1.53572500 | -1.90329500 |
| C | 2.28916000  | -2.92358800 | -1.85537600 |
| C | 2.00394300  | -3.61289300 | -3.04555000 |
| C | 1.91522900  | -2.93519900 | -4.25696200 |
| C | 2.10951300  | -1.55456900 | -4.28344500 |
| C | 2.33860600  | -0.81770500 | -3.10991300 |
| H | 1.48365100  | -3.95991000 | 4.55535800  |
| H | 2.06506500  | -1.01737600 | -5.22604500 |
| C | 2.50450400  | -3.92032900 | -0.71803600 |
| C | 4.00077600  | -4.36325800 | -0.59940400 |
| H | 4.33136400  | -4.94676500 | -1.46380600 |

|   |              |              |              |
|---|--------------|--------------|--------------|
| H | 4. 63172900  | -3. 47048600 | -0. 53231700 |
| H | 0. 93216500  | -5. 48866300 | -3. 29544200 |
| H | 2. 67664400  | -5. 67106500 | -3. 10644200 |
| C | 1. 25149000  | -2. 83120400 | 1. 37277700  |
| H | 3. 35406900  | -5. 24349600 | 3. 54433000  |
| H | 1. 69684800  | -3. 47242500 | -5. 17608600 |
| C | 4. 06417200  | -5. 14687100 | 0. 73135300  |
| H | 3. 84845200  | -6. 21337200 | 0. 58156200  |
| H | 5. 04954000  | -5. 09009800 | 1. 20755900  |
| C | 1. 80696500  | -5. 08680100 | -2. 77502300 |
| C | 1. 64683100  | -5. 12468800 | -1. 24145900 |
| H | 1. 95390700  | -6. 07542300 | -0. 79591100 |
| H | 0. 59752900  | -4. 95785900 | -0. 98217400 |
| C | 2. 54520400  | 0. 66216200  | -3. 18685900 |
| C | 3. 84369600  | 1. 19373000  | -2. 99688200 |
| C | 1. 46093300  | 1. 51116100  | -3. 51355800 |
| C | 4. 98553100  | 0. 37902500  | -2. 70971800 |
| C | 4. 05288500  | 2. 61795200  | -3. 12106800 |
| C | 1. 68751000  | 2. 93336800  | -3. 64157500 |
| C | 6. 22930800  | 0. 92813400  | -2. 53969600 |
| H | 4. 85896100  | -0. 69538000 | -2. 63415800 |
| C | 5. 36590700  | 3. 15096200  | -2. 93010000 |
| C | 2. 97200600  | 3. 44583400  | -3. 43876100 |
| C | 6. 42604900  | 2. 33413200  | -2. 64525700 |
| H | 7. 07852200  | 0. 28488500  | -2. 32449000 |
| H | 5. 50209600  | 4. 22598400  | -3. 02112900 |
| H | 3. 13593200  | 4. 51723700  | -3. 53565600 |
| H | 7. 41925200  | 2. 75131200  | -2. 50375600 |
| C | -0. 13994600 | -2. 13532400 | 3. 37708100  |
| C | -1. 49065400 | -2. 37880300 | 3. 01941500  |
| C | 0. 17434300  | -1. 14914400 | 4. 34653600  |
| C | -1. 87784000 | -3. 38094300 | 2. 07394100  |
| C | -2. 54273100 | -1. 59716700 | 3. 62940200  |
| C | -0. 89212900 | -0. 38484500 | 4. 95784300  |
| C | -3. 19165100 | -3. 57192800 | 1. 73474100  |
| H | -1. 11568500 | -3. 99915600 | 1. 61397100  |
| C | -3. 90064800 | -1. 82421800 | 3. 24192800  |
| C | -2. 21514700 | -0. 62752100 | 4. 58091700  |
| C | -4. 22129600 | -2. 77755600 | 2. 31384100  |
| H | -3. 44718900 | -4. 33111300 | 1. 00284800  |
| H | -4. 67427800 | -1. 21314400 | 3. 70060400  |
| H | -3. 01110300 | -0. 04227200 | 5. 03663500  |
| H | -5. 25066000 | -2. 92348900 | 2. 00120700  |
| C | -0. 90085900 | 1. 88361600  | -4. 02855900 |

|   |             |             |             |
|---|-------------|-------------|-------------|
| H | -1.90780000 | 1.49889900  | -4.16078200 |
| C | 0.12587400  | 1.03154100  | -3.71523100 |
| H | -0.07089600 | -0.02943700 | -3.61001600 |
| C | -0.66880000 | 3.28303500  | -4.16220400 |
| H | -1.49769100 | 3.93978100  | -4.41013400 |
| C | 0.58919800  | 3.78896100  | -3.97206900 |
| H | 0.78002500  | 4.85528300  | -4.06781200 |
| C | 1.78327700  | 0.14057100  | 5.66860200  |
| H | 2.81274900  | 0.36259100  | 5.93301700  |
| C | 0.72757100  | 0.87567900  | 6.27607100  |
| H | 0.95806000  | 1.64483000  | 7.00744000  |
| C | -0.57018000 | 0.61526900  | 5.92746600  |
| H | -1.38760700 | 1.17381500  | 6.37702900  |
| C | 1.51800900  | -0.83938000 | 4.74507200  |
| H | 2.33994300  | -1.39127200 | 4.30330900  |
| N | 2.12894800  | 0.07045900  | 1.58333900  |
| S | 3.63507500  | 0.82407400  | 1.71115300  |
| C | 4.83706800  | -0.62409400 | 1.80950500  |
| O | 3.65796400  | 1.42473400  | 3.03762200  |
| O | 3.96542600  | 1.54252800  | 0.49463300  |
| F | 5.05864500  | -1.14940400 | 0.60700700  |
| F | 5.98107700  | -0.15355400 | 2.30399700  |
| F | 4.35602600  | -1.56677500 | 2.62496500  |
| H | -4.71568800 | 5.09517900  | 1.99187000  |
| H | -4.52206600 | 2.05225000  | 1.81454800  |
| C | -0.44340800 | 4.65833500  | 1.06950700  |
| C | 0.09412500  | 5.10682600  | 2.28994500  |
| C | 0.46116500  | 4.17715000  | 0.11118500  |
| C | 1.46260900  | 5.06011500  | 2.54785900  |
| H | -0.56106600 | 5.50841700  | 3.05742100  |
| C | 1.83479000  | 4.12369100  | 0.36559800  |
| H | 0.11382300  | 3.83834100  | -0.85903700 |
| C | 2.34314200  | 4.56062100  | 1.58680500  |
| H | 1.84037900  | 5.41218300  | 3.50461100  |
| H | 2.50267300  | 3.73019100  | -0.39402700 |
| H | 3.40908100  | 4.50856100  | 1.78817900  |
| C | -2.36235000 | 6.26546000  | 0.71240000  |
| H | -3.45392200 | 6.31553900  | 0.60238900  |
| H | -2.12004300 | 6.74434000  | 1.66874900  |
| C | -1.72676900 | 7.04783600  | -0.40678900 |
| H | -2.05977200 | 6.81439000  | -1.41935400 |
| C | -0.81321000 | 8.00871800  | -0.24309000 |
| H | -0.47983700 | 8.24827200  | 0.76830300  |
| C | -6.50066700 | 3.03469700  | 1.78483200  |

|   |             |            |             |
|---|-------------|------------|-------------|
| H | -6.84229400 | 2.59293800 | 0.83955100  |
| H | -6.94353100 | 2.43842900 | 2.59456600  |
| H | -6.90570100 | 4.05043500 | 1.85038300  |
| C | -0.18470900 | 8.80472600 | -1.35055700 |
| H | -0.57289100 | 8.50730100 | -2.33088900 |
| H | -0.36962100 | 9.88047700 | -1.22521000 |
| H | 0.90600400  | 8.67397300 | -1.36275400 |

INT-13-6

0 imaginary frequency

H = -5315.392682

G = -5315.597255

E(M06-2X-DCM) = -5316.275567

E(M06-2X-cyclohexane) = -5316.250333

|   |             |             |             |
|---|-------------|-------------|-------------|
| C | 4.26460600  | -2.38930800 | 0.47241100  |
| C | 5.26150500  | -3.22217500 | 1.35205800  |
| H | 4.80268900  | -3.36216900 | 2.34064900  |
| H | 5.35468700  | -4.22571400 | 0.92185800  |
| C | 6.63324800  | -2.62791000 | 1.54485600  |
| C | 3.93622400  | -1.08281000 | 1.25352800  |
| H | 4.84513600  | -0.50807600 | 1.43369200  |
| H | 3.50579800  | -1.33852600 | 2.23175300  |
| N | 3.02453300  | -0.19776900 | 0.54904500  |
| C | 3.20194500  | 1.13978800  | 0.38996500  |
| N | 2.09668500  | 1.73591800  | -0.18323300 |
| C | 1.87098800  | 3.09280900  | -0.46342300 |
| C | 2.84782200  | 3.93905600  | -1.01256500 |
| C | 0.58292700  | 3.59582500  | -0.23755200 |
| C | 2.53072600  | 5.26531600  | -1.30085200 |
| C | 0.28190100  | 4.92502900  | -0.54018500 |
| H | -0.17004300 | 2.95418000  | 0.20879800  |
| C | 1.25122000  | 5.77412800  | -1.06907300 |
| H | 1.01773500  | 6.80619500  | -1.29881000 |
| C | -1.11632800 | 5.42290500  | -0.30824000 |
| C | 3.60264400  | 6.18122600  | -1.83291100 |
| F | -1.97334300 | 4.98782500  | -1.26815400 |
| F | -1.19260300 | 6.76775200  | -0.29404800 |
| F | -1.61985600 | 4.97900700  | 0.87530000  |
| F | 4.26882000  | 6.80300500  | -0.83458200 |
| F | 3.08275000  | 7.15178800  | -2.62032500 |
| F | 4.51911300  | 5.51357700  | -2.56557800 |
| S | 4.59834600  | 1.96812200  | 0.85294500  |
| H | 3.84098800  | 3.55939600  | -1.20520700 |
| C | 7.78036800  | -3.25972100 | 1.27731000  |



|   |             |             |             |
|---|-------------|-------------|-------------|
| H | 1.26883100  | 1.14413900  | -0.25740600 |
| H | 2.12856000  | -0.59025100 | 0.26909200  |
| H | -0.58847500 | -2.60079400 | 1.09390200  |
| O | -1.60028600 | 0.64999500  | 1.19400500  |
| O | -2.58258300 | -0.69766600 | -0.77418900 |
| P | -1.31249700 | -0.59127900 | 0.20774100  |
| O | 0.04792500  | -0.43283000 | -0.36184500 |
| C | -4.80213700 | 0.40139300  | 3.87139600  |
| C | -5.03316700 | 0.70399400  | 2.53422000  |
| C | -3.96084700 | 0.91389200  | 1.65212700  |
| C | -2.39309100 | 0.39620600  | 3.46118600  |
| C | -3.48842900 | 0.29663100  | 4.33287800  |
| C | -2.97047400 | 0.40608600  | -1.56830300 |
| C | -3.77623900 | 1.39387800  | -1.00763200 |
| C | -4.07623800 | 2.52636100  | -1.78546000 |
| C | -3.64659200 | 2.62489600  | -3.10387300 |
| C | -2.90123100 | 1.58552400  | -3.65822600 |
| C | -2.53332400 | 0.45998200  | -2.90479400 |
| H | -3.29633400 | 0.10283300  | 5.38393900  |
| H | -2.57106700 | 1.64286600  | -4.69115200 |
| C | -4.48951600 | 1.48969300  | 0.34123400  |
| C | -5.91030200 | 0.83616500  | 0.31563200  |
| H | -6.60443400 | 1.37078600  | -0.34017000 |
| H | -5.81948500 | -0.19267500 | -0.05076800 |
| H | -4.49024600 | 4.55917500  | -1.13589500 |
| H | -5.91894800 | 3.52871300  | -1.25050500 |
| C | -2.67443400 | 0.65865400  | 2.10771200  |
| H | -5.63217200 | 0.25142600  | 4.55692400  |
| H | -3.88163100 | 3.50469700  | -3.69676600 |
| C | -6.35104200 | 0.82479100  | 1.79831800  |
| H | -6.88251400 | 1.74780500  | 2.06743900  |
| H | -7.02651900 | -0.00668300 | 2.02763100  |
| C | -4.85418500 | 3.53957700  | -0.97892900 |
| C | -4.63102300 | 3.04777100  | 0.46369400  |
| H | -5.42860900 | 3.33818400  | 1.15334200  |
| H | -3.69191500 | 3.46304900  | 0.84344900  |
| C | -1.72546400 | -0.62479500 | -3.55027200 |
| C | -2.36805400 | -1.81274000 | -3.97423900 |
| C | -0.34845700 | -0.42550200 | -3.80734600 |
| C | -3.77423100 | -2.03175900 | -3.81923500 |
| C | -1.59628600 | -2.84834100 | -4.62282200 |
| C | 0.40822900  | -1.46308500 | -4.47209700 |
| C | -4.36755600 | -3.19102400 | -4.24708900 |
| H | -4.37688500 | -1.25728200 | -3.35763100 |

|   |             |             |             |
|---|-------------|-------------|-------------|
| C | -2.25157300 | -4.04808800 | -5.04231100 |
| C | -0.23097500 | -2.64781000 | -4.84728200 |
| C | -3.59747100 | -4.21974900 | -4.86047100 |
| H | -5.43810500 | -3.32827500 | -4.12040000 |
| H | -1.65371200 | -4.82000100 | -5.52123600 |
| H | 0.34407300  | -3.42558500 | -5.34617700 |
| H | -4.08453300 | -5.13342900 | -5.18984100 |
| C | -0.98862500 | 0.26922700  | 3.96227200  |
| C | -0.13980600 | 1.40535700  | 3.94065800  |
| C | -0.51782400 | -0.96309300 | 4.47912100  |
| C | -0.56997500 | 2.69163300  | 3.48171700  |
| C | 1.22198700  | 1.28809900  | 4.41026100  |
| C | 0.84386900  | -1.06055300 | 4.95858000  |
| C | 0.28266900  | 3.76494100  | 3.45948500  |
| H | -1.59475000 | 2.81898200  | 3.15171700  |
| C | 2.08158000  | 2.42982100  | 4.36300600  |
| C | 1.67514200  | 0.06133500  | 4.90376100  |
| C | 1.63066100  | 3.63464100  | 3.89702000  |
| H | -0.07407100 | 4.72256500  | 3.09237600  |
| H | 3.10903200  | 2.31504600  | 4.69773900  |
| H | 2.70073100  | -0.01956400 | 5.25825200  |
| H | 2.29712100  | 4.49093900  | 3.85531400  |
| C | 1.67549700  | 0.94232700  | -3.72904400 |
| H | 2.17505100  | 1.86401500  | -3.44546100 |
| C | 0.34575100  | 0.77389500  | -3.44501000 |
| H | -0.19943500 | 1.56258900  | -2.93853000 |
| C | 2.41464800  | -0.08090000 | -4.38926000 |
| H | 3.46693200  | 0.07452300  | -4.61058000 |
| C | 1.79623900  | -1.24943200 | -4.74477500 |
| H | 2.34690600  | -2.03659000 | -5.25470200 |
| C | -0.83241000 | -3.32519900 | 5.03196100  |
| H | -1.46825800 | -4.20546300 | 5.04882700  |
| C | 0.50536100  | -3.41179200 | 5.51259000  |
| H | 0.87585400  | -4.35310800 | 5.90941900  |
| C | 1.31628000  | -2.30908100 | 5.47325200  |
| H | 2.33956300  | -2.35892100 | 5.83858500  |
| C | -1.32439300 | -2.14571600 | 4.53545600  |
| H | -2.34487300 | -2.10258200 | 4.17325800  |
| N | -1.46846100 | -2.08470200 | 0.99328500  |
| S | -2.80016900 | -3.08737300 | 1.26270200  |
| C | -3.30284000 | -3.72712300 | -0.45163600 |
| O | -3.92711500 | -2.30375700 | 1.74288800  |
| O | -2.27348300 | -4.24580900 | 1.97314100  |
| F | -2.26297500 | -3.69652900 | -1.28231400 |

|   |             |             |             |
|---|-------------|-------------|-------------|
| F | -3.71171800 | -4.98544200 | -0.29641300 |
| F | -4.30015300 | -2.99212900 | -0.92719300 |
| H | 6.68411200  | -1.62174300 | 1.96352200  |
| H | 7.74010800  | -4.27191800 | 0.86859200  |
| C | 2.96500800  | -3.20209000 | 0.30134000  |
| C | 2.29147700  | -3.69621600 | 1.43501600  |
| C | 2.38166500  | -3.45372000 | -0.94999400 |
| C | 1.11439500  | -4.43821100 | 1.32325100  |
| H | 2.68162900  | -3.50557500 | 2.43039400  |
| C | 1.20209800  | -4.19287000 | -1.06985000 |
| H | 2.84997700  | -3.08082100 | -1.85066900 |
| C | 0.56808300  | -4.70133100 | 0.06267000  |
| H | 0.62415800  | -4.80929100 | 2.21903100  |
| H | 0.77790300  | -4.36257800 | -2.05578800 |
| H | -0.34250100 | -5.28610800 | -0.02668100 |
| C | 4.93894900  | -1.98303100 | -0.87142400 |
| H | 4.23948800  | -1.38716100 | -1.46799100 |
| H | 5.75524900  | -1.29797800 | -0.60339600 |
| C | 5.52082800  | -3.08710300 | -1.71679300 |
| H | 6.20047100  | -3.77712800 | -1.21716300 |
| C | 5.32519400  | -3.23114500 | -3.03097700 |
| H | 4.65740600  | -2.53378200 | -3.54246700 |
| C | 9.15371900  | -2.69486500 | 1.50239200  |
| H | 9.10913100  | -1.67944900 | 1.91008800  |
| H | 9.73121100  | -3.31680400 | 2.20003900  |
| H | 9.72714600  | -2.65955200 | 0.56621300  |
| C | 5.96194200  | -4.28600900 | -3.89077100 |
| H | 6.61347100  | -4.94243100 | -3.30379000 |
| H | 5.20582000  | -4.91311500 | -4.38327400 |
| H | 6.56675600  | -3.83838900 | -4.69147000 |

INT-13-7

0 imaginary frequency

H = -5315.384581

G = -5315.590667

E(M06-2X-DCM) = -5316.264348

E(M06-2X-cyclohexane) = -5316.239602

|   |             |             |             |
|---|-------------|-------------|-------------|
| C | -4.89087700 | -0.67830300 | -0.99787500 |
| C | -6.21465800 | -0.91068400 | -1.80599600 |
| H | -5.95815700 | -1.06397500 | -2.86241400 |
| H | -6.66407500 | -1.84782700 | -1.45911400 |
| C | -7.24032100 | 0.19232500  | -1.73566700 |
| C | -4.18642000 | 0.57281300  | -1.59845400 |
| H | -4.85621500 | 1.43181900  | -1.57269600 |

|   |             |             |             |
|---|-------------|-------------|-------------|
| H | -3.94221400 | 0.37906000  | -2.65294000 |
| N | -2.98432700 | 0.97403600  | -0.88393800 |
| C | -2.65108200 | 2.26533600  | -0.60560000 |
| N | -1.43623900 | 2.35070600  | 0.04265900  |
| C | -0.67486700 | 3.43625300  | 0.49382000  |
| C | -1.01149800 | 4.79366600  | 0.35720000  |
| C | 0.53503600  | 3.10971700  | 1.13428500  |
| C | -0.15274800 | 5.77448300  | 0.85375300  |
| C | 1.36859000  | 4.10482700  | 1.63442800  |
| H | 0.82202300  | 2.06930000  | 1.23540100  |
| C | 1.03712300  | 5.45312700  | 1.50299500  |
| H | 1.68253900  | 6.22692900  | 1.89989100  |
| C | 2.67947700  | 3.72033700  | 2.25681800  |
| C | -0.48190100 | 7.22349400  | 0.60699200  |
| F | 3.66460800  | 3.58734100  | 1.32357900  |
| F | 2.60991300  | 2.53208800  | 2.90343000  |
| F | 3.11596000  | 4.63779300  | 3.14385900  |
| F | 0.05604400  | 7.65636200  | -0.56428900 |
| F | 0.01470000  | 8.02482200  | 1.57679400  |
| F | -1.80787100 | 7.44606600  | 0.53356300  |
| S | -3.64331100 | 3.57027600  | -1.01431000 |
| H | -1.93574800 | 5.06835200  | -0.12902900 |
| C | -8.49179400 | 0.04097700  | -1.29203800 |
| H | -0.98680200 | 1.45172500  | 0.21892800  |
| H | -2.30367200 | 0.24746200  | -0.67658400 |
| H | -0.00323900 | -2.48337600 | -1.48751300 |
| O | 2.03014400  | 0.07852200  | -0.48950800 |
| O | 1.73549600  | -1.85837500 | 1.18753600  |
| P | 1.01463900  | -1.07309700 | -0.00607000 |
| O | -0.32373600 | -0.46929600 | 0.20675300  |
| C | 5.45903000  | -1.08622300 | -2.56827300 |
| C | 5.39889200  | -1.24030800 | -1.18758100 |
| C | 4.31461700  | -0.72627200 | -0.45588700 |
| C | 3.28457000  | 0.03041100  | -2.54870000 |
| C | 4.43172700  | -0.40685200 | -3.22862500 |
| C | 2.34887500  | -1.24765300 | 2.29650700  |
| C | 3.64018000  | -0.74284600 | 2.17777500  |
| C | 4.19855600  | -0.10099400 | 3.29803700  |
| C | 3.52795400  | -0.06222100 | 4.51493500  |
| C | 2.25914000  | -0.63119800 | 4.61475000  |
| C | 1.63037900  | -1.21299800 | 3.50445400  |
| H | 4.49868900  | -0.22782900 | -4.29764600 |
| H | 1.72005600  | -0.60160000 | 5.55692200  |
| C | 4.65609000  | -0.75757400 | 1.03391000  |

|   |             |             |             |
|---|-------------|-------------|-------------|
| C | 5.59491800  | -2.00749400 | 1.07159700  |
| H | 6.24642400  | -2.01101100 | 1.95075600  |
| H | 4.98058200  | -2.91251400 | 1.09653800  |
| H | 5.61788000  | 1.54491900  | 3.35475600  |
| H | 6.36723600  | -0.05151900 | 3.33429000  |
| C | 3.23406000  | -0.21177500 | -1.16188400 |
| H | 6.30431200  | -1.47284400 | -3.13192000 |
| H | 3.97527200  | 0.42791700  | 5.37562100  |
| C | 6.37386300  | -1.93985500 | -0.26364500 |
| H | 7.30810900  | -1.37142000 | -0.15949200 |
| H | 6.64913000  | -2.93288900 | -0.63595700 |
| C | 5.52308000  | 0.53383000  | 2.94428800  |
| C | 5.48554700  | 0.52339000  | 1.40395500  |
| H | 6.47672400  | 0.52392400  | 0.94171300  |
| H | 4.94767800  | 1.40965600  | 1.05260700  |
| C | 0.23653300  | -1.74505100 | 3.61883000  |
| C | 0.01055600  | -3.14143300 | 3.64339400  |
| C | -0.84554000 | -0.83911200 | 3.72651800  |
| C | 1.07082100  | -4.10007400 | 3.56508900  |
| C | -1.33995200 | -3.64105800 | 3.76646400  |
| C | -2.19176600 | -1.35292000 | 3.84775400  |
| C | 0.81693900  | -5.44632600 | 3.58959900  |
| H | 2.09319800  | -3.74630900 | 3.48751900  |
| C | -1.56100900 | -5.05405200 | 3.78911800  |
| C | -2.40099700 | -2.73522300 | 3.86410300  |
| C | -0.51618800 | -5.93392900 | 3.70012600  |
| H | 1.64013100  | -6.15222400 | 3.52356700  |
| H | -2.58328800 | -5.41338800 | 3.88108400  |
| H | -3.41625200 | -3.11558800 | 3.95809900  |
| H | -0.69741900 | -7.00504500 | 3.71644600  |
| C | 2.19964200  | 0.78097900  | -3.26006700 |
| C | 2.01108400  | 2.15825000  | -2.97485000 |
| C | 1.39916500  | 0.14433200  | -4.23969200 |
| C | 2.82572200  | 2.88384700  | -2.04797000 |
| C | 0.96554100  | 2.89083600  | -3.65366700 |
| C | 0.36713800  | 0.89455400  | -4.92066500 |
| C | 2.60744000  | 4.21271300  | -1.79209100 |
| H | 3.63577000  | 2.37111400  | -1.54209500 |
| C | 0.76124500  | 4.27208500  | -3.34577700 |
| C | 0.17159400  | 2.23976800  | -4.60147300 |
| C | 1.55400500  | 4.91944500  | -2.43741800 |
| H | 3.23700700  | 4.72778900  | -1.07333800 |
| H | -0.04793200 | 4.79554600  | -3.84861400 |
| H | -0.61520800 | 2.79703100  | -5.10536800 |

|   |              |              |              |
|---|--------------|--------------|--------------|
| H | 1. 37139500  | 5. 96067900  | -2. 18998600 |
| C | -1. 75147800 | 1. 42971500  | 3. 79714900  |
| H | -1. 59503200 | 2. 50439000  | 3. 77164900  |
| C | -0. 67659100 | 0. 58404100  | 3. 70450200  |
| H | 0. 32184100  | 0. 99699600  | 3. 61205300  |
| C | -3. 07516200 | 0. 91798600  | 3. 91545800  |
| H | -3. 91352900 | 1. 60564700  | 3. 97992400  |
| C | -3. 28532000 | -0. 43467100 | 3. 94018200  |
| H | -4. 29236300 | -0. 83770600 | 4. 01536600  |
| C | 0. 76434900  | -1. 82249800 | -5. 54648200 |
| H | 0. 90729600  | -2. 87183700 | -5. 78947700 |
| C | -0. 24561000 | -1. 07714700 | -6. 21846700 |
| H | -0. 86032400 | -1. 55942200 | -6. 97359600 |
| C | -0. 43631700 | 0. 24202000  | -5. 90778000 |
| H | -1. 20507400 | 0. 82501900  | -6. 40940800 |
| C | 1. 55302000  | -1. 23384500 | -4. 59228400 |
| H | 2. 31524500  | -1. 81308900 | -4. 08967800 |
| N | 0. 95092100  | -2. 36621600 | -1. 13162200 |
| S | 1. 67901900  | -3. 90011800 | -0. 89696600 |
| C | 1. 72367000  | -4. 50549600 | -2. 67856300 |
| O | 0. 76458500  | -4. 80682300 | -0. 21474000 |
| O | 3. 06303500  | -3. 72756100 | -0. 48627900 |
| F | 0. 58277600  | -4. 19641500 | -3. 30332000 |
| F | 2. 75359100  | -3. 97154900 | -3. 32883800 |
| F | 1. 86421800  | -5. 82757900 | -2. 63919300 |
| H | -6. 94345900 | 1. 17049100  | -2. 11676000 |
| H | -8. 80010500 | -0. 93562800 | -0. 91527200 |
| C | -3. 95755200 | -1. 89532900 | -1. 17847600 |
| C | -3. 73133500 | -2. 42956200 | -2. 46181900 |
| C | -3. 25631900 | -2. 47995800 | -0. 11167300 |
| C | -2. 87909900 | -3. 51288800 | -2. 66539600 |
| H | -4. 22404800 | -1. 99608400 | -3. 32619900 |
| C | -2. 40320200 | -3. 57050200 | -0. 30688100 |
| H | -3. 36298600 | -2. 09228000 | 0. 89443000  |
| C | -2. 21727100 | -4. 10046100 | -1. 58394800 |
| H | -2. 73722400 | -3. 90159000 | -3. 67065000 |
| H | -1. 88498200 | -4. 00491000 | 0. 54298800  |
| H | -1. 57003900 | -4. 95962400 | -1. 72947300 |
| C | -5. 24334200 | -0. 38831100 | 0. 48865900  |
| H | -4. 31537600 | -0. 19258300 | 1. 04139300  |
| H | -5. 80569300 | 0. 55155000  | 0. 51818800  |
| C | -6. 04124900 | -1. 45623200 | 1. 19517500  |
| H | -5. 67241500 | -2. 48011100 | 1. 12296900  |
| C | -7. 14553700 | -1. 23029800 | 1. 91465200  |

|   |              |             |             |
|---|--------------|-------------|-------------|
| H | -7.52822600  | -0.21049000 | 1.98379400  |
| C | -9.53630600  | 1.12012300  | -1.26804100 |
| H | -10.41074600 | 0.84243000  | -1.87260800 |
| H | -9.90515000  | 1.29467500  | -0.24799800 |
| H | -9.14543900  | 2.06809400  | -1.65282500 |
| C | -7.92856700  | -2.28094100 | 2.65064600  |
| H | -8.96642000  | -2.32895700 | 2.29314900  |
| H | -7.48354600  | -3.27464900 | 2.52849700  |
| H | -7.98096400  | -2.06272300 | 3.72624300  |

INT-13-8

0 imaginary frequency

H = -5315.392640

G = -5315.595469

E(M06-2X-DCM) = -5316.271694

E(M06-2X-cyclohexane) = -5316.246935

|   |             |             |             |
|---|-------------|-------------|-------------|
| C | 3.50292100  | -3.84311700 | -0.66167700 |
| C | 4.91503800  | -3.55227200 | -0.06644800 |
| H | 5.14490500  | -4.31575800 | 0.68558400  |
| H | 5.61979700  | -3.73613600 | -0.89191800 |
| C | 5.22185400  | -2.18550400 | 0.49062800  |
| C | 3.16325000  | -2.84041300 | -1.80564200 |
| H | 2.39382000  | -3.27653900 | -2.45622700 |
| H | 4.04839600  | -2.67394800 | -2.42228900 |
| N | 2.69623100  | -1.53308500 | -1.36548000 |
| C | 3.13373400  | -0.33978700 | -1.84223500 |
| N | 2.33998900  | 0.70677800  | -1.41712400 |
| C | 2.52438400  | 2.08824000  | -1.56837500 |
| C | 3.78438400  | 2.70847700  | -1.56980400 |
| C | 1.37535500  | 2.88794700  | -1.64835500 |
| C | 3.87384100  | 4.09389000  | -1.68073400 |
| C | 1.48560900  | 4.27435200  | -1.75275600 |
| H | 0.39508500  | 2.42328800  | -1.62792500 |
| C | 2.73350900  | 4.89254600  | -1.78331200 |
| H | 2.81798800  | 5.96789400  | -1.88353700 |
| C | 0.24152000  | 5.11481700  | -1.75313800 |
| C | 5.22145400  | 4.76016300  | -1.59126700 |
| F | -0.79643900 | 4.49493000  | -2.36410200 |
| F | 0.42047600  | 6.30266700  | -2.36408300 |
| F | -0.17491600 | 5.39089100  | -0.48334400 |
| F | 6.22512400  | 3.94785000  | -1.97056600 |
| F | 5.49130100  | 5.15270000  | -0.31659600 |
| F | 5.28136800  | 5.87414800  | -2.35438800 |
| S | 4.48036800  | -0.16882000 | -2.84920000 |

|   |             |             |             |
|---|-------------|-------------|-------------|
| H | 4.67980800  | 2.10963200  | -1.49128500 |
| C | 5.77248900  | -1.96725300 | 1.68911000  |
| H | 1.42763200  | 0.44069700  | -1.04324400 |
| H | 1.83046100  | -1.53000300 | -0.83266100 |
| H | -0.92330800 | -1.93147200 | 1.69958100  |
| O | -1.12527400 | 1.35166100  | 0.92986900  |
| O | -2.83345500 | -0.10829700 | -0.35590000 |
| P | -1.37687100 | -0.12096000 | 0.33076200  |
| O | -0.19753000 | -0.51354300 | -0.47832100 |
| C | -3.63117900 | 2.79569000  | 3.95695200  |
| C | -4.06330900 | 2.78717200  | 2.63586600  |
| C | -3.19028400 | 2.42040800  | 1.59903600  |
| C | -1.44677100 | 1.95066800  | 3.25301500  |
| C | -2.31834500 | 2.42395900  | 4.24738200  |
| C | -3.12145300 | 0.80166400  | -1.40029500 |
| C | -3.49051400 | 2.10496300  | -1.07634800 |
| C | -3.67018500 | 3.02650100  | -2.12276300 |
| C | -3.56781500 | 2.62984300  | -3.45113800 |
| C | -3.27845800 | 1.29829700  | -3.74408900 |
| C | -3.03481600 | 0.35559000  | -2.73252200 |
| H | -1.95690100 | 2.46618400  | 5.27035300  |
| H | -3.21497800 | 0.96969600  | -4.77710500 |
| C | -3.83073300 | 2.76721500  | 0.25751500  |
| C | -5.34117400 | 2.59848200  | 0.62791200  |
| H | -6.00198400 | 3.12979300  | -0.06401000 |
| H | -5.59710400 | 1.53336900  | 0.59254900  |
| H | -3.36876800 | 5.17896500  | -2.09924800 |
| H | -5.00805300 | 4.67196700  | -1.68790600 |
| C | -1.93838600 | 1.91827200  | 1.93452100  |
| H | -4.30226100 | 3.09375900  | 4.75832100  |
| H | -3.70977000 | 3.34733300  | -4.25493200 |
| C | -5.43541900 | 3.10967300  | 2.08372900  |
| H | -5.64305300 | 4.18782900  | 2.11960600  |
| H | -6.23251000 | 2.61596900  | 2.65050400  |
| C | -3.94676100 | 4.40867300  | -1.57915700 |
| C | -3.54364000 | 4.26780300  | -0.09859000 |
| H | -4.07297000 | 4.95787100  | 0.56451400  |
| H | -2.47191800 | 4.46173600  | 0.00473000  |
| C | -2.73007000 | -1.06057700 | -3.11571900 |
| C | -3.74351400 | -2.04386000 | -3.01057100 |
| C | -1.47157900 | -1.38790800 | -3.67357100 |
| C | -5.06754800 | -1.74855700 | -2.55364200 |
| C | -3.46263200 | -3.40297900 | -3.41405200 |
| C | -1.21184500 | -2.74737400 | -4.09351500 |



|   |             |             |             |
|---|-------------|-------------|-------------|
| C | -6.02915700 | -2.72221200 | -2.47326800 |
| H | -5.30937100 | -0.72940800 | -2.27260100 |
| C | -4.48845900 | -4.39225400 | -3.29773800 |
| C | -2.20442900 | -3.71788600 | -3.93498600 |
| C | -5.73683000 | -4.06654400 | -2.83999500 |
| H | -7.02743000 | -2.46767200 | -2.12738300 |
| H | -4.25540900 | -5.41182800 | -3.59566800 |
| H | -2.00105100 | -4.74028600 | -4.24758700 |
| H | -6.51020700 | -4.82593800 | -2.76427000 |
| C | -0.05123000 | 1.54272100  | 3.60911100  |
| C | 1.04429500  | 2.31114300  | 3.13878200  |
| C | 0.17049700  | 0.43818600  | 4.46971700  |
| C | 0.88814000  | 3.47378200  | 2.31836400  |
| C | 2.39020200  | 1.93890800  | 3.51308100  |
| C | 1.52216000  | 0.09056100  | 4.84963300  |
| C | 1.97114800  | 4.18808600  | 1.87732700  |
| H | -0.10861800 | 3.79893300  | 2.04367200  |
| C | 3.49356400  | 2.70296900  | 3.01849300  |
| C | 2.59042800  | 0.84342400  | 4.35692500  |
| C | 3.29633300  | 3.79379900  | 2.21601200  |
| H | 1.81392400  | 5.06064500  | 1.25196600  |
| H | 4.49793400  | 2.39210700  | 3.29578900  |
| H | 3.60531000  | 0.57350900  | 4.64216700  |
| H | 4.13957300  | 4.35401900  | 1.82348900  |
| C | 0.76797400  | -0.76868400 | -4.43439900 |
| H | 1.54677800  | -0.02291500 | -4.56240100 |
| C | -0.42782300 | -0.42462500 | -3.86057100 |
| H | -0.59820100 | 0.59864900  | -3.54552400 |
| C | 1.01503400  | -2.10829800 | -4.85213400 |
| H | 1.97102600  | -2.35785000 | -5.30323000 |
| C | 0.05376200  | -3.06761800 | -4.67913300 |
| H | 0.22803700  | -4.09312500 | -4.99704100 |
| C | -0.63814900 | -1.43831300 | 5.81533300  |
| H | -1.46503800 | -2.04282500 | 6.17631400  |
| C | 0.69363300  | -1.76453500 | 6.19887500  |
| H | 0.87270100  | -2.60325500 | 6.86628000  |
| C | 1.74027600  | -1.02039500 | 5.72378100  |
| H | 2.76363600  | -1.25763400 | 6.00546000  |
| C | -0.88926200 | -0.37725000 | 4.98439100  |
| H | -1.91097500 | -0.14817400 | 4.70585600  |
| N | -1.68011100 | -1.25533800 | 1.55458100  |
| S | -3.09772500 | -1.72621000 | 2.33909900  |
| C | -4.11981000 | -2.63292000 | 1.02616700  |
| O | -3.87718600 | -0.55760000 | 2.71471500  |

|   |             |             |             |
|---|-------------|-------------|-------------|
| O | -2.69051600 | -2.75373500 | 3.28937700  |
| F | -4.99475500 | -1.79537200 | 0.48638500  |
| F | -3.32125000 | -3.14269900 | 0.08797200  |
| F | -4.76829500 | -3.61858900 | 1.64279600  |
| H | 5.05808200  | -1.33826000 | -0.17213700 |
| H | 5.96875600  | -2.81933600 | 2.34517900  |
| C | 2.36802100  | -3.88491500 | 0.37673600  |
| C | 2.58829800  | -3.72273500 | 1.75305600  |
| C | 1.04696600  | -4.12875800 | -0.04215700 |
| C | 1.54158000  | -3.81028400 | 2.67260100  |
| H | 3.58389300  | -3.50604000 | 2.11656400  |
| C | -0.00176500 | -4.22906400 | 0.87316600  |
| H | 0.82344400  | -4.24983100 | -1.09871000 |
| C | 0.24006800  | -4.07354800 | 2.24215900  |
| H | 1.74319400  | -3.66538800 | 3.73029500  |
| H | -1.00816600 | -4.42831700 | 0.51413000  |
| H | -0.57156000 | -4.15667400 | 2.95882800  |
| C | 3.59315100  | -5.24599200 | -1.36467200 |
| H | 2.62331000  | -5.44894100 | -1.84040400 |
| H | 4.32836600  | -5.17579400 | -2.17764800 |
| C | 3.94557700  | -6.39920000 | -0.46607900 |
| H | 3.26485100  | -6.58600300 | 0.36588600  |
| C | 5.00147200  | -7.20189500 | -0.62985200 |
| H | 5.68110400  | -7.01327300 | -1.46352100 |
| C | 6.17027000  | -0.62104100 | 2.22456400  |
| H | 5.93657500  | 0.17746800  | 1.51272300  |
| H | 5.65180400  | -0.39743500 | 3.16769600  |
| H | 7.24655100  | -0.57864100 | 2.44154800  |
| C | 5.34251500  | -8.37372700 | 0.24592100  |
| H | 5.36347700  | -9.30907400 | -0.33002600 |
| H | 6.33948000  | -8.26018800 | 0.69305600  |
| H | 4.61793200  | -8.49311300 | 1.05859800  |

INT-13-9

0 imaginary frequency

H = -5315.393669

G = -5315.597163

E(M06-2X-DCM) = -5316.278327

E(M06-2X-cyclohexane) = -5316.254011

|   |             |            |            |
|---|-------------|------------|------------|
| C | -1.42473800 | 4.62299900 | 0.74366700 |
| C | -2.31023600 | 4.08023200 | 1.91607000 |
| H | -2.09842300 | 3.01435100 | 2.05787600 |
| H | -1.99462400 | 4.58815100 | 2.83737600 |
| C | -3.79719800 | 4.26965000 | 1.76696600 |

|   |             |             |             |
|---|-------------|-------------|-------------|
| C | -1.95875800 | 4.07388900  | -0.60196400 |
| H | -1.42309100 | 4.51967400  | -1.44772800 |
| H | -3.00589000 | 4.35751500  | -0.71372000 |
| N | -1.90108600 | 2.62035100  | -0.66913500 |
| C | -2.81000400 | 1.83978200  | -1.30262300 |
| N | -2.49333900 | 0.49554100  | -1.20434200 |
| C | -3.25427900 | -0.64110400 | -1.49721600 |
| C | -4.65915800 | -0.66130100 | -1.52928700 |
| C | -2.55975900 | -1.84617300 | -1.69080100 |
| C | -5.33135700 | -1.85746700 | -1.76878500 |
| C | -3.25260200 | -3.03313400 | -1.92330900 |
| H | -1.47539700 | -1.85482900 | -1.64707300 |
| C | -4.64492500 | -3.05412400 | -1.97609800 |
| H | -5.18017200 | -3.97517900 | -2.17135900 |
| C | -2.48934300 | -4.32131000 | -2.02700600 |
| C | -6.83534800 | -1.88085400 | -1.69629300 |
| F | -3.15746300 | -5.26549700 | -2.71879200 |
| F | -2.23584200 | -4.84927900 | -0.79476300 |
| F | -1.28389100 | -4.15750700 | -2.62318000 |
| F | -7.38686300 | -0.70122000 | -2.03749400 |
| F | -7.26031200 | -2.16353100 | -0.43457400 |
| F | -7.36391700 | -2.83024600 | -2.49997100 |
| S | -4.13686700 | 2.45569400  | -2.14652100 |
| H | -5.21239800 | 0.25288100  | -1.37274100 |
| C | -4.68269600 | 3.27427600  | 1.66360700  |
| H | -1.54486300 | 0.29800200  | -0.88454000 |
| H | -1.05138400 | 2.17642100  | -0.32887700 |
| H | 1.78715600  | 1.28716100  | 1.83099100  |
| O | 0.39889500  | -1.66485300 | 0.84858200  |
| O | 2.55149400  | -1.03477000 | -0.42818400 |
| P | 1.28261200  | -0.41678300 | 0.34536800  |
| O | 0.38692000  | 0.53710200  | -0.35232500 |
| C | 2.00437400  | -4.26554300 | 3.70145900  |
| C | 2.39000900  | -4.36725500 | 2.36968400  |
| C | 1.76607900  | -3.58802300 | 1.38186800  |
| C | 0.42435300  | -2.49586000 | 3.11565200  |
| C | 0.99553700  | -3.36745100 | 4.05557600  |
| C | 2.37703700  | -1.90970400 | -1.52433800 |
| C | 2.15175500  | -3.26250000 | -1.28136100 |
| C | 1.89395200  | -4.09976500 | -2.38132500 |
| C | 1.93887300  | -3.60996600 | -3.68159900 |
| C | 2.24045000  | -2.26561500 | -3.89479300 |
| C | 2.45495200  | -1.38112400 | -2.82660300 |
| H | 0.65931200  | -3.30794300 | 5.08642800  |

|   |             |             |             |
|---|-------------|-------------|-------------|
| H | 2.29618700  | -1.87349900 | -4.90593700 |
| C | 2.18550600  | -4.09150400 | 0.00300400  |
| C | 3.61932900  | -4.62001800 | 0.33651400  |
| H | 3.98205400  | -5.33886600 | -0.40478500 |
| H | 4.31337000  | -3.77215200 | 0.35749700  |
| H | 0.70211500  | -5.91615800 | -2.46074700 |
| H | 2.40541900  | -6.18175300 | -2.08340700 |
| C | 0.87328900  | -2.60433800 | 1.78630800  |
| H | 2.47836700  | -4.87819100 | 4.46395000  |
| H | 1.73744100  | -4.26455000 | -4.52535900 |
| C | 3.48274200  | -5.21777900 | 1.75672400  |
| H | 3.20031900  | -6.27877900 | 1.72183100  |
| H | 4.41620100  | -5.15816600 | 2.32708100  |
| C | 1.55906000  | -5.49954200 | -1.92257100 |
| C | 1.27156900  | -5.29377700 | -0.42315400 |
| H | 1.45452000  | -6.18617100 | 0.18199700  |
| H | 0.22301900  | -5.01073700 | -0.29183200 |
| C | 2.78599700  | 0.05276300  | -3.11204000 |
| C | 4.13409500  | 0.47897400  | -3.04049800 |
| C | 1.77215000  | 0.94995900  | -3.52279700 |
| C | 5.21131800  | -0.40526800 | -2.71256800 |
| C | 4.46326000  | 1.85475700  | -3.33619200 |
| C | 2.11593200  | 2.32307500  | -3.81988000 |
| C | 6.50754600  | 0.03750700  | -2.65921600 |
| H | 4.98999500  | -1.44724200 | -2.50914700 |
| C | 5.82676300  | 2.27853600  | -3.25801000 |
| C | 3.44576000  | 2.73864200  | -3.70856300 |
| C | 6.82319700  | 1.39972400  | -2.92807100 |
| H | 7.30576400  | -0.65736500 | -2.41223400 |
| H | 6.05519000  | 3.31890200  | -3.47757000 |
| H | 3.69892900  | 3.77230400  | -3.93702500 |
| H | 7.85607500  | 1.73323400  | -2.87822900 |
| C | -0.63758700 | -1.51819400 | 3.51313000  |
| C | -1.96146000 | -1.69660500 | 3.03682100  |
| C | -0.33145400 | -0.44055200 | 4.38058400  |
| C | -2.34827100 | -2.79338600 | 2.20205800  |
| C | -2.98832300 | -0.74984600 | 3.40948400  |
| C | -1.37223500 | 0.49361400  | 4.75129900  |
| C | -3.63451600 | -2.92804500 | 1.74883800  |
| H | -1.60719800 | -3.53450100 | 1.92523100  |
| C | -4.31670100 | -0.92233800 | 2.90714300  |
| C | -2.66537000 | 0.31825200  | 4.25158500  |
| C | -4.63514600 | -1.97559200 | 2.09273000  |
| H | -3.88883700 | -3.76670300 | 1.10860000  |

|   |             |             |             |
|---|-------------|-------------|-------------|
| H | -5.07074500 | -0.19130700 | 3.18934600  |
| H | -3.44104300 | 1.03047100  | 4.52558100  |
| H | -5.63922300 | -2.08494200 | 1.69408000  |
| C | -0.55557500 | 1.45786500  | -4.07067700 |
| H | -1.59072500 | 1.14430800  | -4.16613000 |
| C | 0.40058900  | 0.56313600  | -3.66715200 |
| H | 0.12201400  | -0.46312300 | -3.45487600 |
| C | -0.21247700 | 2.81181100  | -4.35145000 |
| H | -0.98922200 | 3.50477000  | -4.66139000 |
| C | 1.08591300  | 3.22798600  | -4.22922900 |
| H | 1.36311500  | 4.25637500  | -4.44976700 |
| C | 1.24581500  | 0.85322500  | 5.73030900  |
| H | 2.25587300  | 1.00608000  | 6.09883200  |
| C | 0.21496600  | 1.76421500  | 6.09822200  |
| H | 0.44165700  | 2.59646900  | 6.75915800  |
| C | -1.05513000 | 1.58607400  | 5.61888500  |
| H | -1.85340500 | 2.27262100  | 5.89124800  |
| C | 0.98169400  | -0.20868400 | 4.90447800  |
| H | 1.78113000  | -0.88936800 | 4.63625000  |
| N | 2.11265500  | 0.34077600  | 1.61515100  |
| S | 3.61600200  | 0.03272000  | 2.32225100  |
| C | 4.90044800  | 0.42515800  | 0.97990500  |
| O | 3.75608200  | -1.38795900 | 2.59985000  |
| O | 3.78280700  | 1.06329200  | 3.33897300  |
| F | 5.94834200  | 0.97561200  | 1.59174600  |
| F | 5.27634100  | -0.69787300 | 0.38086400  |
| F | 4.40325900  | 1.28304900  | 0.09242500  |
| C | 0.05785900  | 4.25832300  | 0.97116500  |
| C | 0.57752500  | 4.03662600  | 2.25897700  |
| C | 0.96496600  | 4.19160400  | -0.10305700 |
| C | 1.93719800  | 3.78891200  | 2.46773700  |
| H | -0.07333300 | 4.05227300  | 3.12521800  |
| C | 2.32342700  | 3.94333100  | 0.09834000  |
| H | 0.61576500  | 4.32849800  | -1.12064300 |
| C | 2.82119000  | 3.75187800  | 1.38740900  |
| H | 2.30260700  | 3.61922200  | 3.47646600  |
| H | 2.98790900  | 3.88723500  | -0.75938900 |
| H | 3.87738200  | 3.56076300  | 1.55099000  |
| C | -1.56704000 | 6.18770700  | 0.71344700  |
| H | -2.62944700 | 6.42999500  | 0.59283700  |
| H | -1.26908900 | 6.55251100  | 1.70731100  |
| C | -0.78094600 | 6.92750900  | -0.33578600 |
| C | -1.32309800 | 7.63586900  | -1.33184500 |
| C | -6.16641100 | 3.44590200  | 1.51768100  |

|   |             |            |             |
|---|-------------|------------|-------------|
| H | -6.50954500 | 3.02453800 | 0.56378000  |
| H | -6.71298700 | 2.92179300 | 2.31380500  |
| H | -6.45560400 | 4.50212700 | 1.54583400  |
| C | -0.55300000 | 8.40715100 | -2.36532400 |
| H | -0.80960500 | 9.47499300 | -2.33802700 |
| H | 0.52805500  | 8.31545600 | -2.21402800 |
| H | -0.78677300 | 8.05653600 | -3.37981800 |
| H | -2.41090400 | 7.67558500 | -1.41785200 |
| H | -4.31703400 | 2.24587300 | 1.66490400  |
| H | -4.16852200 | 5.29572900 | 1.76675500  |
| H | 0.30511000  | 6.89203900 | -0.24752200 |

TS-EF-4SS

1 imaginary frequency

H = -5315.358666

G = -5315.559033

E(M06-2X-DCM) = -5316.244184

E(M06-2X-cyclohexane) = -5316.215057

|   |             |             |             |
|---|-------------|-------------|-------------|
| O | -0.62458400 | -2.65787900 | -0.77408300 |
| O | -2.62893400 | -1.12694100 | -0.16036000 |
| P | -0.99127600 | -1.18827800 | -0.15324700 |
| O | -0.50785100 | -0.06981500 | -1.02906100 |
| C | -1.75630600 | -3.30351300 | -4.75338100 |
| C | -2.65188700 | -3.52509000 | -3.71219200 |
| C | -2.24221100 | -3.38001800 | -2.37903900 |
| C | -0.02159800 | -2.69774200 | -3.13200800 |
| C | -0.44803400 | -2.92369200 | -4.45280900 |
| C | -3.36582900 | -2.08420200 | 0.53981700  |
| C | -3.56515700 | -3.34699100 | -0.02162400 |
| C | -4.15933900 | -4.35325800 | 0.75751800  |
| C | -4.65009300 | -4.07555100 | 2.02828100  |
| C | -4.55566700 | -2.77419900 | 2.51882500  |
| C | -3.90900400 | -1.75646200 | 1.79843300  |
| H | 0.26680000  | -2.77068900 | -5.25602200 |
| H | -4.97200400 | -2.53093300 | 3.49197500  |
| C | -3.33608700 | -3.87141700 | -1.43917900 |
| C | -4.59714200 | -3.63169400 | -2.33826200 |
| H | -4.89647800 | -2.58089800 | -2.24969000 |
| H | -5.44941200 | -4.24850500 | -2.03651900 |
| H | -5.15732200 | -5.93343100 | -0.34243600 |
| H | -3.82591100 | -6.50587000 | 0.65685900  |
| C | -0.96010200 | -2.91199300 | -2.10431100 |
| H | -2.06409600 | -3.42640100 | -5.78883300 |
| H | -5.11268000 | -4.85443800 | 2.62912200  |

|   |              |              |              |
|---|--------------|--------------|--------------|
| C | -4. 11284200 | -3. 91412400 | -3. 77769800 |
| H | -4. 66748500 | -3. 34169100 | -4. 53005300 |
| H | -4. 23174600 | -4. 97503200 | -4. 03921300 |
| C | -4. 15277100 | -5. 67507100 | 0. 02118800  |
| C | -3. 18302400 | -5. 40176400 | -1. 14757300 |
| H | -2. 15306400 | -5. 59618400 | -0. 82743500 |
| H | -3. 38044300 | -6. 01665000 | -2. 03121300 |
| C | -3. 89672400 | -0. 37520900 | 2. 37965300  |
| C | -3. 16552300 | -0. 10643200 | 3. 56244400  |
| C | -4. 73244100 | 0. 62421000  | 1. 81925000  |
| C | -2. 29109500 | -1. 06762100 | 4. 16332400  |
| C | -3. 28413500 | 1. 18590600  | 4. 20134400  |
| C | -4. 82928300 | 1. 91781000  | 2. 45949200  |
| C | -1. 60598900 | -0. 78488600 | 5. 31487400  |
| H | -2. 14391300 | -2. 01875200 | 3. 66951200  |
| C | -2. 56357800 | 1. 43471400  | 5. 41237100  |
| C | -4. 10614000 | 2. 16223100  | 3. 63125300  |
| C | -1. 75166500 | 0. 47704900  | 5. 95798500  |
| H | -0. 92561800 | -1. 52301100 | 5. 72827900  |
| H | -2. 68137200 | 2. 40420000  | 5. 89171100  |
| H | -4. 20235500 | 3. 12892400  | 4. 12282100  |
| H | -1. 20717000 | 0. 67796400  | 6. 87673500  |
| C | 1. 38942300  | -2. 26672700 | -2. 88302700 |
| C | 1. 84600300  | -1. 02567100 | -3. 39325100 |
| C | 2. 28984600  | -3. 13238900 | -2. 21377600 |
| C | 0. 98150400  | -0. 08224700 | -4. 03972400 |
| C | 3. 23916800  | -0. 66467500 | -3. 25593300 |
| C | 3. 67033800  | -2. 73775200 | -2. 04765700 |
| C | 1. 46077000  | 1. 09720000  | -4. 54948100 |
| H | -0. 07484100 | -0. 31157900 | -4. 11328600 |
| C | 3. 70319400  | 0. 56890200  | -3. 81600000 |
| C | 4. 11033700  | -1. 52286100 | -2. 57966500 |
| C | 2. 84361200  | 1. 42621400  | -4. 44951900 |
| H | 0. 78016600  | 1. 78919000  | -5. 03940900 |
| H | 4. 76093000  | 0. 80483900  | -3. 72598300 |
| H | 5. 15242500  | -1. 23365300 | -2. 46111600 |
| H | 3. 20972000  | 2. 35648200  | -4. 87602400 |
| C | -6. 34843800 | 1. 38263400  | 0. 14478700  |
| H | -6. 94503000 | 1. 18305200  | -0. 74107400 |
| C | -5. 53243100 | 0. 40436300  | 0. 65149200  |
| H | -5. 49213700 | -0. 56381200 | 0. 16606000  |
| C | -6. 42967000 | 2. 65868000  | 0. 77208800  |
| H | -7. 09085800 | 3. 41893200  | 0. 36452100  |
| C | -5. 69007800 | 2. 91379400  | 1. 89716300  |

|   |             |             |             |
|---|-------------|-------------|-------------|
| H | -5.76138500 | 3.87542900  | 2.40134400  |
| C | 2.79729500  | -5.22182400 | -1.05246200 |
| H | 2.47291700  | -6.18634900 | -0.67111000 |
| C | 4.14946500  | -4.81604900 | -0.86994400 |
| H | 4.84231100  | -5.46935200 | -0.34666400 |
| C | 4.57023500  | -3.61005600 | -1.35983100 |
| H | 5.60212400  | -3.28983200 | -1.23728200 |
| C | 1.90370900  | -4.41280000 | -1.70359500 |
| H | 0.88137100  | -4.74549600 | -1.83973300 |
| C | -1.82056800 | 3.78010100  | -0.77838900 |
| C | -1.79183500 | 4.11636000  | 0.75687500  |
| H | -1.50078500 | 5.16421200  | 0.89062600  |
| H | -2.81996100 | 4.01810400  | 1.13726500  |
| C | -0.94563800 | 3.25629600  | 1.62463100  |
| C | -0.36469100 | 3.58253800  | -1.26040300 |
| H | 0.21025100  | 4.49948700  | -1.12921700 |
| H | -0.36783000 | 3.32551900  | -2.32550200 |
| N | 0.34823100  | 2.51090200  | -0.55430600 |
| C | 1.63438100  | 2.59330000  | -0.14284400 |
| N | 2.31722900  | 1.44415000  | -0.00429100 |
| C | 3.68811900  | 1.35533900  | 0.40618500  |
| C | 4.68184700  | 1.68090300  | -0.51329000 |
| C | 4.02087100  | 0.87044100  | 1.67166500  |
| C | 6.02370300  | 1.51500000  | -0.16888000 |
| C | 5.36781800  | 0.72499800  | 2.00850200  |
| H | 3.23962000  | 0.58774100  | 2.36846700  |
| C | 6.37385000  | 1.04005000  | 1.09336200  |
| H | 7.41538900  | 0.90438600  | 1.35770500  |
| C | 5.73847200  | 0.26429600  | 3.39549100  |
| C | 7.06868900  | 1.78587600  | -1.21590800 |
| F | 6.95287900  | -0.33069500 | 3.41591200  |
| F | 4.84383900  | -0.61055000 | 3.89034500  |
| F | 5.79742900  | 1.30587600  | 4.25911400  |
| F | 7.02156900  | 0.85409900  | -2.20806600 |
| F | 8.31893700  | 1.76628700  | -0.71517700 |
| F | 6.88153100  | 2.98313200  | -1.81194200 |
| S | 2.29754400  | 4.10445300  | 0.38250100  |
| H | 4.40242400  | 2.03348000  | -1.49968800 |
| H | 1.85688100  | 0.54595100  | -0.18463600 |
| H | 0.00563700  | 1.55021100  | -0.75419200 |
| C | 0.03711600  | 3.79164500  | 2.46410100  |
| H | -0.09461300 | 4.85912900  | 2.68025400  |
| H | 0.95417200  | 3.98171400  | 1.57847500  |
| N | -0.57708900 | -1.23871800 | 1.40688600  |



|   |             |             |             |
|---|-------------|-------------|-------------|
| S | 0.92847100  | -1.36031100 | 1.89527400  |
| O | 1.17946300  | -0.51392500 | 3.07489600  |
| O | 1.93117900  | -1.30753600 | 0.80460500  |
| C | 1.03868600  | -3.10704400 | 2.55233100  |
| F | 0.76508000  | -3.98926700 | 1.58846300  |
| F | 0.16512600  | -3.28110400 | 3.55749800  |
| F | 2.27177200  | -3.33150600 | 3.01522800  |
| H | -1.11227900 | 2.18064400  | 1.62434700  |
| C | 0.66578500  | 2.97174300  | 3.58139800  |
| H | 0.77934700  | 1.91970200  | 3.30262400  |
| H | 1.65104200  | 3.37015000  | 3.84284500  |
| H | 0.03645500  | 3.00797300  | 4.47732100  |
| C | -2.46634800 | 4.98228400  | -1.49533700 |
| C | -3.75902700 | 5.39275900  | -1.12393200 |
| C | -1.82507100 | 5.70867000  | -2.50888000 |
| C | -4.37994000 | 6.48151500  | -1.73281500 |
| H | -4.29932100 | 4.85255700  | -0.35122100 |
| C | -2.44582800 | 6.79948300  | -3.12384800 |
| H | -0.83082900 | 5.43538100  | -2.84362800 |
| C | -3.72470100 | 7.19380100  | -2.73892200 |
| H | -5.37934100 | 6.77253400  | -1.41974500 |
| H | -1.92020000 | 7.33865500  | -3.90752600 |
| H | -4.20652600 | 8.04292600  | -3.21572700 |
| C | -2.68381900 | 2.49865200  | -1.02923500 |
| H | -3.70606000 | 2.71293000  | -0.70388400 |
| H | -2.32301600 | 1.68649800  | -0.38984500 |
| C | -2.69606500 | 2.01088100  | -2.45624900 |
| H | -1.84978300 | 1.39629600  | -2.76178500 |
| C | -3.67563700 | 2.25101000  | -3.33288600 |
| H | -4.53296500 | 2.84725600  | -3.01584400 |
| C | -3.70460700 | 1.75633000  | -4.75065700 |
| H | -4.59228300 | 1.13682800  | -4.93876100 |
| H | -3.75027700 | 2.59145000  | -5.46323000 |
| H | -2.81902200 | 1.15599100  | -4.98565700 |

TS-EF-4SS-1

l imaginary frequency

H = -5315.358665

G = -5315.559033

E(M06-2X-DCM) = -5316.244184

E(M06-2X-cyclohexane) = -5316.215057

|   |             |             |             |
|---|-------------|-------------|-------------|
| O | -0.62458500 | -2.65787800 | -0.77408500 |
| O | -2.62893500 | -1.12694000 | -0.16036000 |
| P | -0.99127700 | -1.18827800 | -0.15324800 |

|   |             |             |             |
|---|-------------|-------------|-------------|
| O | -0.50785200 | -0.06981400 | -1.02906100 |
| C | -1.75630900 | -3.30350800 | -4.75338400 |
| C | -2.65189000 | -3.52508600 | -3.71219500 |
| C | -2.24221300 | -3.38001400 | -2.37904100 |
| C | -0.02160000 | -2.69773800 | -3.13201100 |
| C | -0.44803600 | -2.92368700 | -4.45281200 |
| C | -3.36582900 | -2.08420200 | 0.53981600  |
| C | -3.56515800 | -3.34699000 | -0.02162600 |
| C | -4.15934000 | -4.35325800 | 0.75751500  |
| C | -4.65009400 | -4.07555200 | 2.02827800  |
| C | -4.55566800 | -2.77420100 | 2.51882400  |
| C | -3.90900400 | -1.75646300 | 1.79843200  |
| H | 0.26679700  | -2.77068300 | -5.25602500 |
| H | -4.97200400 | -2.53093600 | 3.49197400  |
| C | -3.33608800 | -3.87141500 | -1.43918200 |
| C | -4.59714400 | -3.63169100 | -2.33826400 |
| H | -4.89648000 | -2.58089500 | -2.24969200 |
| H | -5.44941400 | -4.24850200 | -2.03652200 |
| H | -5.15732300 | -5.93342900 | -0.34244100 |
| H | -3.82591200 | -6.50587000 | 0.65685300  |
| C | -0.96010400 | -2.91199000 | -2.10431400 |
| H | -2.06409800 | -3.42639500 | -5.78883500 |
| H | -5.11268000 | -4.85443900 | 2.62911800  |
| C | -4.11284400 | -3.91412000 | -3.77770100 |
| H | -4.66748800 | -3.34168600 | -4.53005500 |
| H | -4.23174900 | -4.97502700 | -4.03921700 |
| C | -4.15277200 | -5.67507000 | 0.02118300  |
| C | -3.18302600 | -5.40176200 | -1.14757700 |
| H | -2.15306600 | -5.59618200 | -0.82743900 |
| H | -3.38044500 | -6.01664700 | -2.03121800 |
| C | -3.89672300 | -0.37521100 | 2.37965400  |
| C | -3.16552200 | -0.10643500 | 3.56244500  |
| C | -4.73243900 | 0.62421000  | 1.81925200  |
| C | -2.29109500 | -1.06762500 | 4.16332400  |
| C | -3.28413300 | 1.18590200  | 4.20134700  |
| C | -4.82928100 | 1.91780900  | 2.45949500  |
| C | -1.60598800 | -0.78489200 | 5.31487500  |
| H | -2.14391300 | -2.01875600 | 3.66951100  |
| C | -2.56357500 | 1.43470800  | 5.41237400  |
| C | -4.10613700 | 2.16222800  | 3.63125700  |
| C | -1.75166400 | 0.47704200  | 5.95798700  |
| H | -0.92561800 | -1.52301800 | 5.72827800  |
| H | -2.68136900 | 2.40419400  | 5.89171500  |
| H | -4.20235200 | 3.12892100  | 4.12282600  |

|   |             |             |             |
|---|-------------|-------------|-------------|
| H | -1.20716900 | 0.67795600  | 6.87673700  |
| C | 1.38942100  | -2.26672300 | -2.88302900 |
| C | 1.84600100  | -1.02566700 | -3.39325200 |
| C | 2.28984400  | -3.13238700 | -2.21378000 |
| C | 0.98150200  | -0.08224200 | -4.03972400 |
| C | 3.23916600  | -0.66467200 | -3.25593300 |
| C | 3.67033600  | -2.73775000 | -2.04766100 |
| C | 1.46076800  | 1.09720600  | -4.54947900 |
| H | -0.07484300 | -0.31157400 | -4.11328600 |
| C | 3.70319200  | 0.56890600  | -3.81600000 |
| C | 4.11033500  | -1.52285800 | -2.57966700 |
| C | 2.84361000  | 1.42621900  | -4.44951700 |
| H | 0.78016400  | 1.78919600  | -5.03940600 |
| H | 4.76092800  | 0.80484400  | -3.72598200 |
| H | 5.15242300  | -1.23365100 | -2.46111800 |
| H | 3.20971700  | 2.35648800  | -4.87602000 |
| C | -6.34843700 | 1.38263600  | 0.14479000  |
| H | -6.94502900 | 1.18305600  | -0.74107100 |
| C | -5.53243000 | 0.40436400  | 0.65149400  |
| H | -5.49213700 | -0.56381000 | 0.16606200  |
| C | -6.42966800 | 2.65868200  | 0.77209200  |
| H | -7.09085500 | 3.41893400  | 0.36452600  |
| C | -5.69007500 | 2.91379400  | 1.89716800  |
| H | -5.76138100 | 3.87542800  | 2.40135000  |
| C | 2.79729300  | -5.22182300 | -1.05246900 |
| H | 2.47291500  | -6.18634900 | -0.67111800 |
| C | 4.14946300  | -4.81604800 | -0.86995100 |
| H | 4.84230900  | -5.46935200 | -0.34667200 |
| C | 4.57023300  | -3.61005500 | -1.35983600 |
| H | 5.60212200  | -3.28983100 | -1.23728700 |
| C | 1.90370700  | -4.41279800 | -1.70360000 |
| H | 0.88137000  | -4.74549400 | -1.83973900 |
| C | -1.82056600 | 3.78010200  | -0.77838600 |
| C | -1.79183200 | 4.11636000  | 0.75687800  |
| H | -1.50078100 | 5.16421200  | 0.89063000  |
| H | -2.81995800 | 4.01810500  | 1.13726800  |
| C | -0.94563600 | 3.25629500  | 1.62463300  |
| C | -0.36468900 | 3.58253900  | -1.26040100 |
| H | 0.21025300  | 4.49948800  | -1.12921400 |
| H | -0.36782800 | 3.32552000  | -2.32550000 |
| N | 0.34823300  | 2.51090300  | -0.55430400 |
| C | 1.63438300  | 2.59330000  | -0.14284200 |
| N | 2.31723000  | 1.44414900  | -0.00428900 |
| C | 3.68812000  | 1.35533800  | 0.40618700  |

|   |              |              |              |
|---|--------------|--------------|--------------|
| C | 4. 68184800  | 1. 68090300  | -0. 51328800 |
| C | 4. 02087200  | 0. 87043800  | 1. 67166600  |
| C | 6. 02370400  | 1. 51499800  | -0. 16887800 |
| C | 5. 36781900  | 0. 72499300  | 2. 00850300  |
| H | 3. 23962100  | 0. 58773700  | 2. 36846800  |
| C | 6. 37385100  | 1. 04004600  | 1. 09336400  |
| H | 7. 41539000  | 0. 90438200  | 1. 35770600  |
| C | 5. 73847100  | 0. 26428900  | 3. 39549100  |
| C | 7. 06869000  | 1. 78587600  | -1. 21590600 |
| F | 6. 95288700  | -0. 33068300 | 3. 41591800  |
| F | 4. 84384800  | -0. 61057500 | 3. 89033300  |
| F | 5. 79740400  | 1. 30586400  | 4. 25912100  |
| F | 7. 02156800  | 0. 85410100  | -2. 20806600 |
| F | 8. 31893800  | 1. 76628300  | -0. 71517500 |
| F | 6. 88153400  | 2. 98313300  | -1. 81193600 |
| S | 2. 29754600  | 4. 10445300  | 0. 38250300  |
| H | 4. 40242500  | 2. 03348100  | -1. 49968500 |
| H | 1. 85688100  | 0. 54595100  | -0. 18463400 |
| H | 0. 00563800  | 1. 55021200  | -0. 75419100 |
| C | 0. 03711800  | 3. 79164200  | 2. 46410400  |
| H | -0. 09461100 | 4. 85912600  | 2. 68025900  |
| H | 0. 95417400  | 3. 98171300  | 1. 57847800  |
| N | -0. 57708900 | -1. 23871900 | 1. 40688500  |
| S | 0. 92847100  | -1. 36031300 | 1. 89527200  |
| O | 1. 17946400  | -0. 51392900 | 3. 07489500  |
| O | 1. 93117900  | -1. 30753700 | 0. 80460200  |
| C | 1. 03868600  | -3. 10704700 | 2. 55232700  |
| F | 0. 76507900  | -3. 98926900 | 1. 58845700  |
| F | 0. 16512600  | -3. 28110800 | 3. 55749400  |
| F | 2. 27177200  | -3. 33151000 | 3. 01522300  |
| H | -1. 11227800 | 2. 18064300  | 1. 62434800  |
| C | 0. 66578600  | 2. 97173900  | 3. 58140100  |
| H | 0. 77935000  | 1. 91969900  | 3. 30262400  |
| H | 1. 65104200  | 3. 37014700  | 3. 84285000  |
| H | 0. 03645400  | 3. 00796600  | 4. 47732200  |
| C | -2. 46634600 | 4. 98228600  | -1. 49533400 |
| C | -3. 75902500 | 5. 39276200  | -1. 12392800 |
| C | -1. 82506800 | 5. 70867300  | -2. 50887600 |
| C | -4. 37993700 | 6. 48151800  | -1. 73281000 |
| H | -4. 29931900 | 4. 85255900  | -0. 35121800 |
| C | -2. 44582500 | 6. 79948700  | -3. 12384300 |
| H | -0. 83082600 | 5. 43538400  | -2. 84362400 |
| C | -3. 72469700 | 7. 19380500  | -2. 73891600 |
| H | -5. 37933800 | 6. 77253700  | -1. 41974100 |

|   |             |            |             |
|---|-------------|------------|-------------|
| H | -1.92019700 | 7.33865900 | -3.90752000 |
| H | -4.20652300 | 8.04293000 | -3.21572100 |
| C | -2.68381700 | 2.49865400 | -1.02923300 |
| H | -3.70605800 | 2.71293200 | -0.70388100 |
| H | -2.32301500 | 1.68649900 | -0.38984400 |
| C | -2.69606500 | 2.01088400 | -2.45624800 |
| H | -1.84978300 | 1.39630000 | -2.76178500 |
| C | -3.67563700 | 2.25101400 | -3.33288400 |
| H | -4.53296500 | 2.84726000 | -3.01584000 |
| C | -3.70460900 | 1.75633500 | -4.75065500 |
| H | -4.59228500 | 1.13683400 | -4.93875900 |
| H | -3.75027900 | 2.59145600 | -5.46322700 |
| H | -2.81902400 | 1.15599600 | -4.98565600 |

TS-EF-4SS-2

l imaginary frequency

H = -5315.353121

G = -5315.554992

E(M06-2X-DCM) = -5316.233653

E(M06-2X-cyclohexane) = -5316.204590

|   |             |             |             |
|---|-------------|-------------|-------------|
| O | -0.96460900 | -1.92686700 | -1.69299800 |
| O | -2.89726400 | -0.73448500 | -0.41518000 |
| P | -1.26477500 | -0.85097000 | -0.49114800 |
| O | -0.74016600 | 0.51798400  | -0.80276000 |
| C | -2.08079900 | -0.76333100 | -5.55259200 |
| C | -3.00905900 | -1.32139900 | -4.67890300 |
| C | -2.60458800 | -1.78932400 | -3.42120600 |
| C | -0.31895000 | -1.06172300 | -3.87387700 |
| C | -0.74500600 | -0.67603200 | -5.15785000 |
| C | -3.67065100 | -1.87885300 | -0.19783700 |
| C | -3.92816000 | -2.74539600 | -1.26306500 |
| C | -4.56331700 | -3.97198000 | -1.00670300 |
| C | -5.02432200 | -4.28585100 | 0.26635500  |
| C | -4.87391200 | -3.34846900 | 1.28678900  |
| C | -4.19990700 | -2.13345500 | 1.08435700  |
| H | -0.00505000 | -0.28272000 | -5.84877300 |
| H | -5.27598800 | -3.55323300 | 2.27481500  |
| C | -3.73223600 | -2.57934100 | -2.77048000 |
| C | -4.96959400 | -1.88971200 | -3.43871000 |
| H | -5.20166700 | -0.97254700 | -2.88511300 |
| H | -5.86128400 | -2.52426300 | -3.42312900 |
| H | -5.65922200 | -4.82757600 | -2.66945500 |
| H | -4.35434200 | -5.85573200 | -2.08646300 |
| C | -1.29418400 | -1.58334900 | -3.00083700 |

|   |             |             |             |
|---|-------------|-------------|-------------|
| H | -2.38179300 | -0.41247600 | -6.53662000 |
| H | -5.51241000 | -5.23702100 | 0.46321700  |
| C | -4.49650400 | -1.53213400 | -4.86679900 |
| H | -4.99906400 | -0.64408800 | -5.26722100 |
| H | -4.69684200 | -2.35081400 | -5.57211300 |
| C | -4.63824000 | -4.81186700 | -2.26239400 |
| C | -3.66545300 | -4.08159900 | -3.20969500 |
| H | -2.64571300 | -4.44826300 | -3.04542900 |
| H | -3.90249100 | -4.21697100 | -4.26956100 |
| C | -4.18772500 | -1.14264700 | 2.21104000  |
| C | -3.37370200 | -1.34383600 | 3.35014800  |
| C | -5.13068000 | -0.08441900 | 2.18999700  |
| C | -2.44653500 | -2.42846200 | 3.45250900  |
| C | -3.47333100 | -0.43500900 | 4.47127800  |
| C | -5.23181200 | 0.80693200  | 3.32403900  |
| C | -1.67124300 | -2.59986900 | 4.56829800  |
| H | -2.34140100 | -3.10344200 | 2.61412700  |
| C | -2.64540400 | -0.64967200 | 5.61833300  |
| C | -4.39053600 | 0.61772200  | 4.42394000  |
| C | -1.77016600 | -1.70123100 | 5.66824700  |
| H | -0.95548900 | -3.41510400 | 4.60256000  |
| H | -2.73799400 | 0.03824100  | 6.45612700  |
| H | -4.47409900 | 1.28854700  | 5.27725700  |
| H | -1.14613900 | -1.85456900 | 6.54469100  |
| C | 1.12737300  | -0.95023300 | -3.50709800 |
| C | 1.76767500  | 0.31526200  | -3.51222400 |
| C | 1.88065500  | -2.12110100 | -3.23550800 |
| C | 1.07251500  | 1.54156600  | -3.77367000 |
| C | 3.18753800  | 0.40175000  | -3.24739600 |
| C | 3.28922400  | -2.01234800 | -2.92990900 |
| C | 1.73481300  | 2.74226500  | -3.83158500 |
| H | 0.00088700  | 1.50913500  | -3.93128000 |
| C | 3.83778100  | 1.67595100  | -3.30501700 |
| C | 3.90546600  | -0.75872400 | -2.94735600 |
| C | 3.13888500  | 2.81593500  | -3.59955400 |
| H | 1.18425800  | 3.65047600  | -4.06645000 |
| H | 4.90978000  | 1.71104600  | -3.12210400 |
| H | 4.96815000  | -0.68261800 | -2.72599900 |
| H | 3.64709100  | 3.77476000  | -3.65651400 |
| C | -6.99614000 | 1.10644300  | 1.14660400  |
| H | -7.69082300 | 1.22193400  | 0.31876700  |
| C | -6.04841900 | 0.11655000  | 1.10757500  |
| H | -6.00066500 | -0.54761600 | 0.25201100  |
| C | -7.08822700 | 1.98246800  | 2.26598700  |

|   |             |             |             |
|---|-------------|-------------|-------------|
| H | -7.85062300 | 2.75672500  | 2.28323300  |
| C | -6.22217400 | 1.83883200  | 3.31632800  |
| H | -6.28538800 | 2.49600300  | 4.18086000  |
| C | 2.06903400  | -4.54608300 | -2.99503500 |
| H | 1.60986100  | -5.53036500 | -3.02814100 |
| C | 3.44785900  | -4.42818800 | -2.66271000 |
| H | 4.02645900  | -5.31976900 | -2.43729600 |
| C | 4.03807800  | -3.19456100 | -2.63809100 |
| H | 5.09328200  | -3.08762200 | -2.39876200 |
| C | 1.31654900  | -3.43590500 | -3.27431700 |
| H | 0.27147000  | -3.55165700 | -3.53528200 |
| C | -0.71197100 | 4.43507700  | -0.05285700 |
| C | -0.92977200 | 4.33372800  | 1.48692100  |
| H | -0.37302600 | 5.12336600  | 2.00176100  |
| H | -2.00129200 | 4.50770800  | 1.67879700  |
| C | -0.57488100 | 3.03056800  | 2.11325900  |
| C | 0.70424700  | 3.89430400  | -0.38708800 |
| H | 1.45801500  | 4.55846700  | 0.03619100  |
| H | 0.84425500  | 3.87017800  | -1.47148500 |
| N | 0.98787100  | 2.53497600  | 0.10016400  |
| C | 2.16010300  | 2.19126100  | 0.68261200  |
| N | 2.60289500  | 0.93376100  | 0.54175200  |
| C | 3.88558500  | 0.47695200  | 0.98890300  |
| C | 5.01069200  | 0.87972100  | 0.27279600  |
| C | 4.00065000  | -0.42323300 | 2.04814100  |
| C | 6.26656800  | 0.38124100  | 0.61702600  |
| C | 5.26682100  | -0.90134300 | 2.39269100  |
| H | 3.11443700  | -0.75811900 | 2.57687700  |
| C | 6.40223600  | -0.50673600 | 1.68258600  |
| H | 7.37738700  | -0.89328100 | 1.95235000  |
| C | 5.39745400  | -1.90938100 | 3.50703500  |
| C | 7.45554300  | 0.81849900  | -0.19440100 |
| F | 6.63331600  | -1.88314800 | 4.05785000  |
| F | 5.18910800  | -3.16818900 | 3.06529600  |
| F | 4.50743100  | -1.67945000 | 4.49327600  |
| F | 7.20214400  | 0.70833900  | -1.52614700 |
| F | 8.55435300  | 0.08446200  | 0.06807300  |
| F | 7.76971200  | 2.11329200  | 0.02810100  |
| S | 2.94183300  | 3.30033200  | 1.76475600  |
| H | 4.89437800  | 1.55758200  | -0.56549200 |
| H | 2.03875100  | 0.21697800  | 0.06590400  |
| H | 0.46383600  | 1.77494400  | -0.36858400 |
| C | 0.25426800  | 2.95563400  | 3.23231300  |
| H | 0.32218000  | 3.88592000  | 3.80939600  |

|   |             |             |             |
|---|-------------|-------------|-------------|
| H | 1.40076400  | 3.17281000  | 2.61565900  |
| N | -0.82657800 | -1.60459000 | 0.86845100  |
| S | 0.65884100  | -2.05029000 | 1.17522800  |
| O | 1.03002600  | -1.78694200 | 2.57628100  |
| O | 1.64846700  | -1.65691600 | 0.13725500  |
| C | 0.60413600  | -3.91551600 | 1.05597900  |
| F | 0.18805200  | -4.29913200 | -0.15308700 |
| F | -0.23421400 | -4.41536700 | 1.97857700  |
| F | 1.82506300  | -4.41105200 | 1.27733400  |
| H | -0.98386900 | 2.11471100  | 1.69077100  |
| C | 0.41048000  | 1.67227400  | 4.03300100  |
| H | 0.42168200  | 0.78475100  | 3.39262200  |
| H | 1.34276900  | 1.68744300  | 4.60589900  |
| H | -0.41729300 | 1.55552300  | 4.74131200  |
| C | -0.74749100 | 5.90512700  | -0.52582800 |
| C | -1.11451600 | 6.97400800  | 0.30463600  |
| C | -0.42768100 | 6.20844300  | -1.86188400 |
| C | -1.14200800 | 8.28793900  | -0.16975500 |
| H | -1.39989900 | 6.79966500  | 1.33584200  |
| C | -0.44991400 | 7.51816400  | -2.33824500 |
| H | -0.16696800 | 5.41241700  | -2.55301800 |
| C | -0.80411500 | 8.56915700  | -1.49145000 |
| H | -1.43279800 | 9.09070800  | 0.50263900  |
| H | -0.19292300 | 7.71475700  | -3.37574900 |
| H | -0.82279500 | 9.59100500  | -1.85988100 |
| C | -1.81525100 | 3.62658500  | -0.81406700 |
| H | -1.83525300 | 2.58780000  | -0.47010200 |
| H | -1.51058600 | 3.57697600  | -1.86943700 |
| C | -3.18799900 | 4.23634800  | -0.72887200 |
| H | -3.28862200 | 5.24593600  | -1.12844300 |
| C | -4.27585500 | 3.63622700  | -0.23525600 |
| H | -4.20105200 | 2.62001400  | 0.15463700  |
| C | -5.64022000 | 4.26316900  | -0.20241200 |
| H | -6.36086600 | 3.66792700  | -0.77886500 |
| H | -6.02963800 | 4.31003600  | 0.82219500  |
| H | -5.62658000 | 5.27752800  | -0.61623600 |

TS-EF-4SS-3

l imaginary frequency

H = -5315.353020

G = -5315.555409

E(M06-2X-DCM) = -5316.234197

E(M06-2X-cyclohexane) = -5316.208055

|   |            |             |            |
|---|------------|-------------|------------|
| O | 1.08482600 | -2.63688400 | 0.71322400 |
|---|------------|-------------|------------|



|   |            |             |             |
|---|------------|-------------|-------------|
| O | 3.08324300 | -1.04130000 | 0.28956900  |
| P | 1.44858100 | -1.09977500 | 0.27881500  |
| O | 0.94751900 | -0.06758200 | 1.24079600  |
| C | 2.26775700 | -3.84566600 | 4.54095000  |
| C | 3.14689100 | -3.92454600 | 3.46534500  |
| C | 2.72086600 | -3.58808800 | 2.17256100  |
| C | 0.51829800 | -3.00227800 | 3.04863300  |
| C | 0.95918100 | -3.41571400 | 4.31793100  |
| C | 3.81146700 | -1.89323300 | -0.54533400 |
| C | 4.00766300 | -3.22455300 | -0.17530700 |
| C | 4.58253300 | -4.11007000 | -1.10208100 |
| C | 5.05759200 | -3.65296000 | -2.32610100 |
| C | 4.97281400 | -2.29193400 | -2.61847500 |
| C | 4.34656700 | -1.38696600 | -1.74698100 |
| H | 0.25738700 | -3.37198600 | 5.14571700  |
| H | 5.38329000 | -1.91068100 | -3.54901500 |
| C | 3.79562100 | -3.94775200 | 1.15465700  |
| C | 5.07157500 | -3.84998000 | 2.05968700  |
| H | 5.38130000 | -2.80006000 | 2.11753000  |
| H | 5.91289600 | -4.42474900 | 1.66016500  |
| H | 5.58160900 | -5.84098700 | -0.25933800 |
| H | 4.23021200 | -6.25234300 | -1.30962100 |
| C | 1.44059800 | -3.07456700 | 1.98735300  |
| H | 2.58883100 | -4.11650900 | 5.54367000  |
| H | 5.50366700 | -4.33932600 | -3.04139700 |
| C | 4.60453200 | -4.33131500 | 3.45159600  |
| H | 5.17600400 | -3.87738600 | 4.26928600  |
| H | 4.71546400 | -5.41979600 | 3.55652700  |
| C | 4.57438200 | -5.52504000 | -0.56547400 |
| C | 3.62447000 | -5.41829500 | 0.64622900  |
| H | 2.58819200 | -5.55724700 | 0.31760100  |
| H | 3.82963300 | -6.15660600 | 1.42774700  |
| C | 4.35301400 | 0.07103700  | -2.09366400 |
| C | 3.58350700 | 0.55997000  | -3.17636800 |
| C | 5.23736200 | 0.93665700  | -1.40152000 |
| C | 2.68605200 | -0.26884600 | -3.92265500 |
| C | 3.68643000 | 1.95181100  | -3.55721000 |
| C | 5.33910800 | 2.32287100  | -1.79997100 |
| C | 1.95082500 | 0.23334800  | -4.96336100 |
| H | 2.56737100 | -1.30348800 | -3.62969200 |
| C | 2.90353500 | 2.43522800  | -4.65303300 |
| C | 4.55578900 | 2.79385200  | -2.85829000 |
| C | 2.06207100 | 1.60219000  | -5.33980000 |
| H | 1.25766700 | -0.41433400 | -5.49135300 |

|   |             |             |             |
|---|-------------|-------------|-------------|
| H | 2.99984900  | 3.48242300  | -4.93161700 |
| H | 4.64419100  | 3.83591600  | -3.16093400 |
| H | 1.47272900  | 1.98063500  | -6.17083100 |
| C | -0.88764000 | -2.52335700 | 2.87234600  |
| C | -1.32036400 | -1.35196900 | 3.54356500  |
| C | -1.79890700 | -3.26697000 | 2.08227000  |
| C | -0.43798000 | -0.52214500 | 4.30990300  |
| C | -2.70392500 | -0.94304100 | 3.44836900  |
| C | -3.16806300 | -2.82006500 | 1.95967600  |
| C | -0.89437200 | 0.59077100  | 4.96903300  |
| H | 0.61354400  | -0.77866400 | 4.35164300  |
| C | -3.14041700 | 0.22237200  | 4.15468100  |
| C | -3.58694800 | -1.68444400 | 2.65818800  |
| C | -2.26734600 | 0.96624900  | 4.90189100  |
| H | -0.20144100 | 1.19575500  | 5.54839700  |
| H | -4.18893900 | 0.50280300  | 4.08380300  |
| H | -4.62480500 | -1.36662600 | 2.58019700  |
| H | -2.61392800 | 1.84525200  | 5.43906900  |
| C | 6.96120800  | 1.34209700  | 0.28640100  |
| H | 7.59544600  | 0.97330900  | 1.08794600  |
| C | 6.08508800  | 0.49170600  | -0.33565100 |
| H | 6.03622400  | -0.54638200 | -0.02788000 |
| C | 7.05734000  | 2.70579700  | -0.11156000 |
| H | 7.76659700  | 3.36310400  | 0.38417900  |
| C | 6.26480000  | 3.17867100  | -1.12341200 |
| H | 6.33513500  | 4.21554600  | -1.44459300 |
| C | -2.32810400 | -5.13637300 | 0.59958300  |
| H | -2.01711900 | -6.03740800 | 0.07776600  |
| C | -3.66318300 | -4.66546700 | 0.44828400  |
| H | -4.35535900 | -5.19404100 | -0.20093000 |
| C | -4.07094100 | -3.54648000 | 1.12154900  |
| H | -5.08888400 | -3.18128500 | 1.01697900  |
| C | -1.43280900 | -4.46585600 | 1.39083000  |
| H | -0.42261400 | -4.84400100 | 1.49585200  |
| C | 0.90574800  | 3.61058800  | 1.17347800  |
| C | 1.28754200  | 2.98743200  | -0.20072800 |
| H | 2.16452300  | 3.50950700  | -0.60841200 |
| H | 1.61604000  | 1.96427400  | -0.00866600 |
| C | 0.24823400  | 2.93631400  | -1.27643900 |
| C | -0.40271300 | 2.91052300  | 1.71314000  |
| H | -1.15825900 | 3.65469700  | 1.95168600  |
| H | -0.15796200 | 2.35911000  | 2.62530100  |
| N | -1.05170500 | 1.92131800  | 0.83673400  |
| C | -2.33531900 | 2.01758800  | 0.42016800  |

|   |             |             |             |
|---|-------------|-------------|-------------|
| N | -2.97410500 | 0.86428900  | 0.13819900  |
| C | -4.29081400 | 0.63384500  | -0.32807900 |
| C | -5.38400900 | 1.43706500  | 0.01540200  |
| C | -4.49650400 | -0.52463400 | -1.09260900 |
| C | -6.65884700 | 1.09920300  | -0.44176800 |
| C | -5.77928100 | -0.85605100 | -1.51949900 |
| H | -3.65424100 | -1.15952000 | -1.34185000 |
| C | -6.87049600 | -0.04328800 | -1.21124000 |
| H | -7.86354100 | -0.29386200 | -1.56449600 |
| C | -5.99603200 | -2.14762200 | -2.26546100 |
| C | -7.83585700 | 1.94264900  | -0.02325500 |
| F | -4.91230300 | -2.51382300 | -2.97529700 |
| F | -7.04027600 | -2.06322500 | -3.11809900 |
| F | -6.27344900 | -3.16593900 | -1.40996900 |
| F | -8.35992500 | 1.51189800  | 1.14849300  |
| F | -8.82930300 | 1.90319900  | -0.93676600 |
| F | -7.49184600 | 3.23611600  | 0.15284700  |
| S | -2.99749500 | 3.58824500  | 0.11888700  |
| H | -5.25561900 | 2.31565100  | 0.63157100  |
| H | -2.38152600 | 0.02253800  | 0.09925900  |
| H | -0.60724700 | 0.99196300  | 0.90428000  |
| C | -0.58414400 | 3.95776300  | -1.72229000 |
| H | -0.32693400 | 4.97428100  | -1.41640000 |
| H | -1.57567200 | 3.81696700  | -0.84757000 |
| N | 1.02769900  | -1.00402300 | -1.28597700 |
| S | -0.46584200 | -1.07748300 | -1.77586600 |
| O | -0.80226600 | -0.01188200 | -2.73521900 |
| O | -1.45624600 | -1.32138300 | -0.68476500 |
| C | -0.55777500 | -2.65499400 | -2.77001900 |
| F | 0.26464100  | -2.59253900 | -3.82762300 |
| F | -1.81098500 | -2.82009600 | -3.20927900 |
| F | -0.21488400 | -3.70108900 | -2.01733000 |
| C | 0.76161900  | 5.14514000  | 1.16639200  |
| C | 0.10912700  | 5.79690800  | 2.22714500  |
| C | 1.36556000  | 5.95917600  | 0.19589100  |
| C | 0.02887800  | 7.18762700  | 2.29551500  |
| H | -0.33971100 | 5.21861000  | 3.02981500  |
| C | 1.28567500  | 7.35239300  | 0.25559700  |
| H | 1.91438400  | 5.51407300  | -0.62733000 |
| C | 0.61152600  | 7.97620000  | 1.30358300  |
| H | -0.49114200 | 7.65271500  | 3.12884900  |
| H | 1.75904800  | 7.94746300  | -0.52109700 |
| H | 0.54688100  | 9.05966600  | 1.35110400  |
| C | 2.04848800  | 3.24668800  | 2.19867300  |

|   |             |            |             |
|---|-------------|------------|-------------|
| H | 1.71790600  | 3.59067500 | 3.18691200  |
| H | 2.10015300  | 2.15033100 | 2.23824200  |
| C | 3.40951500  | 3.81708500 | 1.91271700  |
| C | 3.98448400  | 4.78102500 | 2.63905900  |
| H | 3.43365200  | 5.19573000 | 3.48577000  |
| H | 3.95899500  | 3.39192200 | 1.07198300  |
| H | 0.14644700  | 1.97471300 | -1.78244000 |
| C | -1.29045400 | 3.82328800 | -3.06704700 |
| H | -1.53406000 | 2.77734600 | -3.27733200 |
| H | -2.21564000 | 4.40785200 | -3.08692400 |
| H | -0.64272300 | 4.18863800 | -3.87224800 |
| C | 5.34676000  | 5.36193000 | 2.39416900  |
| H | 5.28649500  | 6.44181600 | 2.20027000  |
| H | 5.99561900  | 5.23823900 | 3.27219600  |
| H | 5.83666900  | 4.88583800 | 1.53920700  |

TS-EF-4SS-4

l imaginary frequency

H = -5315.351455

G = -5315.552355

E(M06-2X-DCM) = -5316.233776

E(M06-2X-cyclohexane) = -5316.207887

|   |             |             |             |
|---|-------------|-------------|-------------|
| O | 0.94801300  | -2.70939300 | 0.58243900  |
| O | 2.97728800  | -1.09318400 | 0.54850600  |
| P | 1.36623300  | -1.15740800 | 0.27022400  |
| O | 0.72469900  | -0.17324200 | 1.19950200  |
| C | 1.41585000  | -3.92047600 | 4.56346800  |
| C | 2.48308900  | -3.97523500 | 3.67285000  |
| C | 2.30045700  | -3.64544300 | 2.32202600  |
| C | -0.04368400 | -3.12395200 | 2.76450000  |
| C | 0.16168600  | -3.52810300 | 4.09541800  |
| C | 3.84960800  | -1.93148200 | -0.14810200 |
| C | 3.99991900  | -3.25857300 | 0.25714200  |
| C | 4.75393800  | -4.13391900 | -0.54112900 |
| C | 5.43912600  | -3.66851300 | -1.65784400 |
| C | 5.37705900  | -2.31168300 | -1.97152800 |
| C | 4.58034300  | -1.41700100 | -1.23762200 |
| H | -0.68555900 | -3.50818100 | 4.77452700  |
| H | 5.94056700  | -1.92511400 | -2.81558800 |
| C | 3.55638600  | -3.98222300 | 1.52774700  |
| C | 4.63646400  | -3.85516200 | 2.65595900  |
| H | 4.90633100  | -2.79844300 | 2.76659600  |
| H | 5.55064400  | -4.41049100 | 2.42417600  |
| H | 5.61493600  | -5.83968000 | 0.48448900  |

|   |              |              |              |
|---|--------------|--------------|--------------|
| H | 4. 49240700  | -6. 28398800 | -0. 79659600 |
| C | 1. 06528700  | -3. 16252500 | 1. 89815300  |
| H | 1. 54931200  | -4. 18402300 | 5. 60971800  |
| H | 6. 02658800  | -4. 34555800 | -2. 27282000 |
| C | 3. 92617800  | -4. 34691100 | 3. 93660300  |
| H | 4. 32179800  | -3. 87898800 | 4. 84536600  |
| H | 4. 04112600  | -5. 43228200 | 4. 06629600  |
| C | 4. 67595300  | -5. 54719700 | -0. 00626100 |
| C | 3. 51469200  | -5. 45790100 | 1. 00624400  |
| H | 2. 56107800  | -5. 62124900 | 0. 49134100  |
| H | 3. 58601400  | -6. 18920600 | 1. 81737700  |
| C | 4. 60704000  | 0. 03268200  | -1. 61438900 |
| C | 4. 09840800  | 0. 45018300  | -2. 86874100 |
| C | 5. 26183900  | 0. 96388800  | -0. 76843700 |
| C | 3. 39437500  | -0. 43297300 | -3. 74843800 |
| C | 4. 27036400  | 1. 82228500  | -3. 29236800 |
| C | 5. 41620500  | 2. 33587100  | -1. 19954800 |
| C | 2. 91527000  | -0. 00206600 | -4. 95702200 |
| H | 3. 20654500  | -1. 44868000 | -3. 42652500 |
| C | 3. 76739600  | 2. 22768200  | -4. 56876300 |
| C | 4. 92448200  | 2. 72520100  | -2. 44948900 |
| C | 3. 11257900  | 1. 34252900  | -5. 38145900 |
| H | 2. 35806400  | -0. 68775300 | -5. 58817700 |
| H | 3. 91702100  | 3. 26023400  | -4. 87649100 |
| H | 5. 06382200  | 3. 75374600  | -2. 77803600 |
| H | 2. 73009900  | 1. 66329600  | -6. 34675500 |
| C | -1. 41376300 | -2. 71075900 | 2. 32889500  |
| C | -2. 02851400 | -1. 57682700 | 2. 91673700  |
| C | -2. 12784700 | -3. 50170400 | 1. 39428200  |
| C | -1. 33936000 | -0. 69469900 | 3. 81217100  |
| C | -3. 40497000 | -1. 26514600 | 2. 60144400  |
| C | -3. 48315700 | -3. 14243600 | 1. 04376500  |
| C | -1. 97274000 | 0. 37699700  | 4. 38705500  |
| H | -0. 29073300 | -0. 87448700 | 4. 01588600  |
| C | -4. 03518800 | -0. 14748800 | 3. 23678700  |
| C | -4. 09085200 | -2. 05180800 | 1. 67216800  |
| C | -3. 34348600 | 0. 64949600  | 4. 10933100  |
| H | -1. 42372900 | 1. 02906700  | 5. 06157900  |
| H | -5. 07714700 | 0. 05918200  | 3. 00307500  |
| H | -5. 12262400 | -1. 80736300 | 1. 42870800  |
| H | -3. 83264500 | 1. 49412300  | 4. 58760200  |
| C | 6. 45359300  | 1. 52731900  | 1. 29353700  |
| H | 6. 86540800  | 1. 22343100  | 2. 25213500  |
| C | 5. 81892500  | 0. 60552300  | 0. 50169400  |

|   |             |             |             |
|---|-------------|-------------|-------------|
| H | 5.73840200  | -0.42210800 | 0.83641300  |
| C | 6.58991600  | 2.87980200  | 0.86970800  |
| H | 7.10106300  | 3.59618700  | 1.50709200  |
| C | 6.08928400  | 3.26617000  | -0.34511600 |
| H | 6.20551400  | 4.29077100  | -0.69221500 |
| C | -2.28638800 | -5.39701500 | -0.14051500 |
| H | -1.83840400 | -6.27676100 | -0.59482500 |
| C | -3.60472600 | -5.01098400 | -0.51367000 |
| H | -4.14549600 | -5.58860900 | -1.25833100 |
| C | -4.18605900 | -3.91807700 | 0.06921000  |
| H | -5.18796200 | -3.60635600 | -0.21307700 |
| C | -1.57672800 | -4.67141500 | 0.77988300  |
| H | -0.57587700 | -4.98551000 | 1.05187500  |
| C | 1.30328100  | 3.52138100  | 0.83163500  |
| C | 1.47058000  | 2.92386300  | -0.61118300 |
| H | 2.35696700  | 3.39078200  | -1.06634600 |
| H | 1.70587000  | 1.86097300  | -0.52326200 |
| C | 0.35583500  | 3.06024100  | -1.59388200 |
| C | -0.06545700 | 3.04633500  | 1.44639800  |
| H | -0.74111700 | 3.87294000  | 1.63984100  |
| H | 0.13971600  | 2.56037200  | 2.40330200  |
| N | -0.81396400 | 2.05840800  | 0.65566400  |
| C | -2.09096800 | 2.19398100  | 0.25577200  |
| N | -2.73203900 | 1.06415500  | -0.11328100 |
| C | -4.09790500 | 0.90239200  | -0.44161600 |
| C | -4.43422000 | -0.01509800 | -1.44674500 |
| C | -5.10610600 | 1.54387800  | 0.28054400  |
| C | -5.77557000 | -0.26401000 | -1.72849000 |
| C | -6.44411800 | 1.28283300  | -0.01666500 |
| H | -4.85540900 | 2.21615300  | 1.09087400  |
| C | -6.79156800 | 0.38525000  | -1.02293200 |
| H | -7.83261700 | 0.18977100  | -1.25026900 |
| C | -7.50117300 | 1.91539000  | 0.84849500  |
| C | -6.15321900 | -1.29463100 | -2.76062500 |
| F | -7.54755500 | 1.31959300  | 2.06794000  |
| F | -8.73261700 | 1.81440200  | 0.30959300  |
| F | -7.25355000 | 3.22417200  | 1.06774400  |
| F | -7.22777100 | -0.90248800 | -3.48075900 |
| F | -6.49063800 | -2.47321200 | -2.17694000 |
| F | -5.15134300 | -1.54889700 | -3.62182400 |
| S | -2.77497600 | 3.77487800  | 0.04084500  |
| H | -3.64871500 | -0.53585800 | -1.98260100 |
| H | -2.15723300 | 0.22305000  | -0.26671500 |
| H | -0.42422100 | 1.10165100  | 0.75617600  |

|   |             |             |             |
|---|-------------|-------------|-------------|
| C | -0.40554600 | 4.19089700  | -1.88238300 |
| H | -0.02940900 | 5.14209700  | -1.50038100 |
| H | -1.36279200 | 4.01985600  | -1.00085100 |
| N | 1.20443900  | -0.97808900 | -1.33098900 |
| S | -0.17658700 | -0.97252300 | -2.09352400 |
| O | -0.24604500 | 0.09923400  | -3.10092900 |
| O | -1.37310200 | -1.13633600 | -1.21803800 |
| C | -0.15601700 | -2.55777400 | -3.08195300 |
| F | 0.87558200  | -2.56118200 | -3.93918500 |
| F | -1.29214700 | -2.65814900 | -3.77878600 |
| F | -0.04407800 | -3.60861100 | -2.26834000 |
| C | 1.47186000  | 5.06212800  | 0.77933600  |
| C | 0.43041100  | 5.98389800  | 0.96956700  |
| C | 2.74450000  | 5.58887400  | 0.49164700  |
| C | 0.64969700  | 7.36239800  | 0.88259500  |
| H | -0.58131700 | 5.65127100  | 1.17295400  |
| C | 2.96711300  | 6.96142200  | 0.40301800  |
| H | 3.58593400  | 4.91967300  | 0.34046500  |
| C | 1.91867600  | 7.86121400  | 0.60031600  |
| H | -0.18397700 | 8.04245600  | 1.03711700  |
| H | 3.96667900  | 7.32745600  | 0.18285200  |
| H | 2.08960200  | 8.93213000  | 0.53442900  |
| C | 2.44411900  | 2.86035200  | 1.66921000  |
| H | 2.26684900  | 1.77646100  | 1.64283700  |
| H | 3.40434900  | 2.99589300  | 1.15496800  |
| C | 2.63014700  | 3.25230200  | 3.11464900  |
| C | 1.98117000  | 4.15647800  | 3.85433900  |
| H | 1.19551100  | 4.76444700  | 3.40968300  |
| H | 3.41935500  | 2.67516000  | 3.60200600  |
| H | 0.13163700  | 2.15617600  | -2.16596300 |
| C | -1.18261500 | 4.26791100  | -3.19376200 |
| H | -1.52704700 | 3.27707200  | -3.50590400 |
| H | -2.05505700 | 4.92138300  | -3.09595800 |
| H | -0.54497900 | 4.67267000  | -3.98770900 |
| C | 2.27074900  | 4.43012900  | 5.30409100  |
| H | 2.56827400  | 5.47618300  | 5.45952200  |
| H | 1.38278100  | 4.26216000  | 5.92893200  |
| H | 3.07508600  | 3.78946100  | 5.68184200  |

TS-EF-4SR

l imaginary frequency

H = -5315.352154

G = -5315.553120

E(M06-2X-DCM) = -5316.241096

E(M06-2X-cyclohexane) = -5316.210985

|   |             |             |             |
|---|-------------|-------------|-------------|
| O | -0.68455000 | -2.46233800 | -0.85770200 |
| O | -2.62723900 | -0.94812200 | -0.04076200 |
| P | -0.98932300 | -1.03963000 | -0.09659900 |
| O | -0.50120300 | 0.14203000  | -0.87617600 |
| C | -1.93022800 | -2.75365000 | -4.84162400 |
| C | -2.81061200 | -3.02133600 | -3.79800400 |
| C | -2.36501000 | -2.99881300 | -2.46890200 |
| C | -0.13392200 | -2.35584900 | -3.22304300 |
| C | -0.59905000 | -2.45822300 | -4.54615400 |
| C | -3.36322900 | -1.94904300 | 0.59452000  |
| C | -3.62234400 | -3.14553300 | -0.07778600 |
| C | -4.22302400 | -4.20543000 | 0.62174500  |
| C | -4.66249700 | -4.03969000 | 1.93000300  |
| C | -4.50668500 | -2.79674800 | 2.54137000  |
| C | -3.85100500 | -1.73299800 | 1.90050700  |
| H | 0.10522000  | -2.28082000 | -5.35369400 |
| H | -4.87951200 | -2.63844300 | 3.54910300  |
| C | -3.44907200 | -3.54006400 | -1.54496600 |
| C | -4.72445400 | -3.18741700 | -2.38366400 |
| H | -4.98939600 | -2.14034600 | -2.19540400 |
| H | -5.58772400 | -3.80333500 | -2.11305300 |
| H | -5.30162900 | -5.64337600 | -0.59274900 |
| H | -3.96304700 | -6.34749400 | 0.30803500  |
| C | -1.06008100 | -2.60055700 | -2.19021700 |
| H | -2.26528700 | -2.78415000 | -5.87557300 |
| H | -5.12991500 | -4.86009500 | 2.46867600  |
| C | -4.28560700 | -3.35700100 | -3.85540900 |
| H | -4.84088000 | -2.70535300 | -4.54039700 |
| H | -4.44712900 | -4.38662400 | -4.20435300 |
| C | -4.27995700 | -5.45042700 | -0.23600600 |
| C | -3.33363400 | -5.09505300 | -1.40131400 |
| H | -2.30189400 | -5.34540700 | -1.12946900 |
| H | -3.57093200 | -5.61936500 | -2.33230300 |
| C | -3.76206700 | -0.41846700 | 2.61362100  |
| C | -2.97266800 | -0.29079600 | 3.78211200  |
| C | -4.57103400 | 0.66286300  | 2.18329900  |
| C | -2.12899100 | -1.34258700 | 4.26210200  |
| C | -2.99704000 | 0.94584800  | 4.53172900  |
| C | -4.55129600 | 1.90932000  | 2.91633600  |
| C | -1.38930400 | -1.19604100 | 5.40516900  |
| H | -2.04949800 | -2.25267800 | 3.68279700  |
| C | -2.22287200 | 1.05089500  | 5.73037300  |
| C | -3.77085900 | 2.01475500  | 4.07116800  |



|   |             |             |             |
|---|-------------|-------------|-------------|
| C | -1.44434900 | 0.01024800  | 6.15906800  |
| H | -0.73349600 | -1.99965500 | 5.72569300  |
| H | -2.26747900 | 1.98114900  | 6.29265600  |
| H | -3.78110900 | 2.94566700  | 4.63556600  |
| H | -0.85459400 | 0.10406200  | 7.06689600  |
| C | 1.30571100  | -2.03406500 | -2.97292500 |
| C | 1.84244000  | -0.80048600 | -3.42012400 |
| C | 2.15391800  | -2.99738000 | -2.37048700 |
| C | 1.03877900  | 0.23438600  | -4.00258700 |
| C | 3.25963300  | -0.54501500 | -3.28546100 |
| C | 3.55854400  | -2.70454100 | -2.19600900 |
| C | 1.59915500  | 1.39552500  | -4.47173400 |
| H | -0.03418500 | 0.09425700  | -4.05912600 |
| C | 3.80497400  | 0.67704800  | -3.79488800 |
| C | 4.07535500  | -1.49364600 | -2.66357700 |
| C | 3.00334600  | 1.61994700  | -4.38127500 |
| H | 0.96432600  | 2.15363400  | -4.92398000 |
| H | 4.87745100  | 0.83412500  | -3.70542400 |
| H | 5.13479300  | -1.28071000 | -2.53789800 |
| H | 3.43125700  | 2.53839500  | -4.77462900 |
| C | -6.23295500 | 1.63398000  | 0.67048500  |
| H | -6.90423500 | 1.53062600  | -0.17790700 |
| C | -5.45981500 | 0.57140100  | 1.06329200  |
| H | -5.52770300 | -0.37017700 | 0.52965700  |
| C | -6.17323400 | 2.87395500  | 1.36876600  |
| H | -6.78914600 | 3.70736300  | 1.04167100  |
| C | -5.35835000 | 3.00035200  | 2.46213700  |
| H | -5.32324600 | 3.93242100  | 3.02213400  |
| C | 2.53455500  | -5.18466900 | -1.34901800 |
| H | 2.15128600  | -6.14899100 | -1.02648100 |
| C | 3.91038900  | -4.87751300 | -1.15274000 |
| H | 4.56262600  | -5.60468800 | -0.67692100 |
| C | 4.40465000  | -3.67251400 | -1.57086100 |
| H | 5.45546900  | -3.42640300 | -1.43879600 |
| C | 1.69065100  | -4.28103400 | -1.93899700 |
| H | 0.64899300  | -4.54023800 | -2.08626600 |
| C | -1.44983700 | 4.09363700  | -1.51766100 |
| C | -1.75384100 | 4.25796600  | 0.00609800  |
| H | -1.48853000 | 5.28190000  | 0.29318600  |
| H | -2.83891300 | 4.17901700  | 0.16317500  |
| C | -1.08105200 | 3.31660000  | 0.94607800  |
| C | 0.07264300  | 3.86179400  | -1.68822900 |
| H | 0.62532500  | 4.73378100  | -1.33690200 |
| H | 0.30911100  | 3.71924700  | -2.74813900 |

|   |             |             |             |
|---|-------------|-------------|-------------|
| N | 0.57944500  | 2.69548100  | -0.95829900 |
| C | 1.75534000  | 2.66598400  | -0.29604600 |
| N | 2.33120500  | 1.47576800  | -0.06309200 |
| C | 3.66472000  | 1.32834500  | 0.44981800  |
| C | 4.72662100  | 1.58084500  | -0.41500000 |
| C | 3.89807300  | 0.87422200  | 1.74802300  |
| C | 6.03713700  | 1.37022000  | 0.01525500  |
| C | 5.21490700  | 0.68372700  | 2.17059200  |
| H | 3.06695700  | 0.64301600  | 2.40486400  |
| C | 6.28838400  | 0.92411700  | 1.31056700  |
| H | 7.30446500  | 0.75192000  | 1.64338700  |
| C | 5.47825500  | 0.25102900  | 3.59119400  |
| C | 7.15173300  | 1.58095200  | -0.97174600 |
| F | 6.67963900  | -0.35974300 | 3.71207600  |
| F | 4.53822600  | -0.59829600 | 4.04057200  |
| F | 5.49241400  | 1.31315600  | 4.43193700  |
| F | 7.06317600  | 0.70220400  | -2.00817900 |
| F | 8.36955500  | 1.42134900  | -0.41941300 |
| F | 7.10736800  | 2.81545500  | -1.51968000 |
| S | 2.37285300  | 4.11518700  | 0.43565400  |
| H | 4.52354800  | 1.91206900  | -1.42741000 |
| H | 1.84537300  | 0.60998500  | -0.31911100 |
| H | 0.16960800  | 1.77774800  | -1.19681900 |
| C | -0.27003800 | 3.77061800  | 1.98773700  |
| H | -0.42360800 | 4.82442100  | 2.25092700  |
| H | 0.82817900  | 4.00382500  | 1.30185500  |
| N | -0.53269800 | -1.26125700 | 1.43411400  |
| S | 0.98718100  | -1.42383800 | 1.85943400  |
| O | 1.28437000  | -0.66859400 | 3.08849900  |
| O | 1.95356700  | -1.30446600 | 0.74154500  |
| C | 1.10041500  | -3.21531500 | 2.38150700  |
| F | 0.77583700  | -4.02172700 | 1.36706700  |
| F | 0.26818800  | -3.45986800 | 3.40720000  |
| F | 2.34920600  | -3.48732200 | 2.77349600  |
| C | -2.24877500 | 2.98588900  | -2.23067400 |
| C | -3.19962900 | 2.18106600  | -1.59530800 |
| C | -2.05111500 | 2.79083500  | -3.61124900 |
| C | -3.92493900 | 1.22189500  | -2.30753100 |
| H | -3.39330400 | 2.27215900  | -0.53284400 |
| C | -2.77205300 | 1.83675900  | -4.32442900 |
| H | -1.33081000 | 3.39963100  | -4.15101200 |
| C | -3.71806300 | 1.04427100  | -3.67167700 |
| H | -4.64693300 | 0.61246300  | -1.77513800 |
| H | -2.59656300 | 1.71660900  | -5.39026700 |

|   |             |            |             |
|---|-------------|------------|-------------|
| H | -4.28070900 | 0.29586400 | -4.22252200 |
| C | -1.77324700 | 5.47180500 | -2.19406800 |
| H | -1.12970200 | 6.24134400 | -1.74786200 |
| H | -1.49027600 | 5.40593000 | -3.25316800 |
| C | -3.21259900 | 5.89582300 | -2.08936000 |
| C | -3.63134900 | 7.02514100 | -1.50964100 |
| H | -2.89113600 | 7.69803400 | -1.07110100 |
| H | -3.94620900 | 5.22288500 | -2.53392300 |
| H | -1.23762900 | 2.24716500 | 0.81708100  |
| C | -5.06219900 | 7.47206500 | -1.41850200 |
| H | -5.20883300 | 8.43741400 | -1.92146500 |
| H | -5.74110200 | 6.74486800 | -1.87611500 |
| H | -5.36891100 | 7.61480300 | -0.37350500 |
| C | 0.15131600  | 2.86660300 | 3.13675100  |
| H | 0.31343900  | 1.83344200 | 2.81559600  |
| H | 1.07705100  | 3.23026000 | 3.59327900  |
| H | -0.62364800 | 2.84981700 | 3.90989800  |

TS-EF-4SR-1

l imaginary frequency

H = -5315.352799

G = -5315.555698

E(M06-2X-DCM) = -5316.235969

E(M06-2X-cyclohexane) = -5316.209472

|   |             |             |             |
|---|-------------|-------------|-------------|
| O | -1.53236000 | -2.61116500 | -0.20373600 |
| O | -3.04920600 | -0.53421900 | 0.11499000  |
| P | -1.48408800 | -0.98473200 | -0.01907000 |
| O | -0.93886700 | -0.26965200 | -1.21772900 |
| C | -3.31452700 | -3.93861200 | -3.74997300 |
| C | -4.08786000 | -3.65642000 | -2.62828800 |
| C | -3.48024900 | -3.29160100 | -1.41778600 |
| C | -1.28606000 | -3.41197500 | -2.48419000 |
| C | -1.92486000 | -3.84517200 | -3.65842800 |
| C | -3.86337200 | -1.07594900 | 1.11180100  |
| C | -4.42458100 | -2.34068300 | 0.92963400  |
| C | -5.11575600 | -2.93750800 | 1.99658600  |
| C | -5.33988000 | -2.24117100 | 3.17909000  |
| C | -4.87299800 | -0.93237900 | 3.29284800  |
| C | -4.11877400 | -0.32411400 | 2.27578700  |
| H | -1.30958200 | -4.08734200 | -4.52012500 |
| H | -5.07338500 | -0.36273700 | 4.19547400  |
| C | -4.52045600 | -3.23706200 | -0.30511500 |
| C | -5.80226700 | -2.91295700 | -1.14592500 |
| H | -5.83897200 | -1.83262000 | -1.32860200 |

|   |             |             |             |
|---|-------------|-------------|-------------|
| H | -6.72439500 | -3.19486000 | -0.62827900 |
| H | -6.59648200 | -4.42216800 | 1.44163400  |
| H | -5.30876300 | -5.06044200 | 2.45814700  |
| C | -2.10078000 | -3.11114800 | -1.37611700 |
| H | -3.78009300 | -4.23227500 | -4.68751500 |
| H | -5.87993200 | -2.70219900 | 4.00222600  |
| C | -5.59448000 | -3.66049000 | -2.48227500 |
| H | -6.10017600 | -3.17195900 | -3.32311000 |
| H | -5.98758600 | -4.68562700 | -2.43224700 |
| C | -5.51895400 | -4.35350300 | 1.64747500  |
| C | -4.68421100 | -4.63522700 | 0.38046900  |
| H | -3.69236400 | -5.00436600 | 0.66532800  |
| H | -5.13804200 | -5.37591000 | -0.28536500 |
| C | -3.67694300 | 1.09546500  | 2.45628600  |
| C | -2.75440400 | 1.42760300  | 3.47865400  |
| C | -4.26809200 | 2.11869800  | 1.67232900  |
| C | -2.09181600 | 0.43902300  | 4.27485100  |
| C | -2.43635300 | 2.81515300  | 3.73319100  |
| C | -3.92463800 | 3.50070300  | 1.92471300  |
| C | -1.20741700 | 0.79178000  | 5.25947400  |
| H | -2.26930400 | -0.60704600 | 4.06188800  |
| C | -1.51949400 | 3.14128300  | 4.78219400  |
| C | -3.02740700 | 3.81063500  | 2.95080600  |
| C | -0.92436100 | 2.16089600  | 5.52876600  |
| H | -0.69892100 | 0.01778100  | 5.82660500  |
| H | -1.30708600 | 4.19133900  | 4.97141300  |
| H | -2.78714600 | 4.85386800  | 3.14823100  |
| H | -0.22537200 | 2.42029900  | 6.31933100  |
| C | 0.20557500  | -3.30496000 | -2.44013700 |
| C | 0.87303700  | -2.36220700 | -3.26038400 |
| C | 0.95123100  | -4.18810800 | -1.62060900 |
| C | 0.17943700  | -1.42636600 | -4.09564100 |
| C | 2.31835000  | -2.31338900 | -3.26235000 |
| C | 2.39405500  | -4.11118200 | -1.61513200 |
| C | 0.85680800  | -0.54480700 | -4.89869800 |
| H | -0.90344000 | -1.41343400 | -4.07611700 |
| C | 2.98643300  | -1.37500300 | -4.11184600 |
| C | 3.03698500  | -3.18191800 | -2.43676400 |
| C | 2.28160800  | -0.51943400 | -4.91496100 |
| H | 0.30181300  | 0.14538000  | -5.52909600 |
| H | 4.07425500  | -1.36479700 | -4.10925600 |
| H | 4.12441900  | -3.13811800 | -2.43816300 |
| H | 2.80163500  | 0.18110400  | -5.56311900 |
| C | -5.77262800 | 2.86781200  | -0.10540400 |

|   |             |             |             |
|---|-------------|-------------|-------------|
| H | -6.49063900 | 2.63549700  | -0.88704600 |
| C | -5.22506500 | 1.85604300  | 0.63934500  |
| H | -5.52104700 | 0.83093900  | 0.44893500  |
| C | -5.41438800 | 4.22451600  | 0.13441100  |
| H | -5.85923500 | 5.01335400  | -0.46601800 |
| C | -4.52137400 | 4.52749800  | 1.12656300  |
| H | -4.25068400 | 5.56064700  | 1.33361300  |
| C | 1.09060300  | -6.02280800 | -0.01208000 |
| H | 0.59819800  | -6.76973200 | 0.60486000  |
| C | 2.51085300  | -5.92749900 | 0.00443900  |
| H | 3.08866300  | -6.59582400 | 0.63697300  |
| C | 3.14009000  | -4.99986200 | -0.77992900 |
| H | 4.22457000  | -4.91996700 | -0.78402700 |
| C | 0.34055900  | -5.18753200 | -0.79754900 |
| H | -0.73902800 | -5.28359200 | -0.80290600 |
| C | -0.62042100 | 3.48889100  | -2.00028800 |
| C | -1.05087400 | 3.19068700  | -0.51880900 |
| H | -1.68329500 | 4.02761200  | -0.19514300 |
| H | -1.67787200 | 2.29995200  | -0.50657900 |
| C | 0.03016200  | 2.99992500  | 0.50244600  |
| C | 0.44352000  | 2.42978900  | -2.49575600 |
| H | 1.22842200  | 2.94396800  | -3.05307900 |
| H | -0.03983200 | 1.72135600  | -3.16899900 |
| N | 1.09026700  | 1.58363800  | -1.47827800 |
| C | 2.37865500  | 1.64216800  | -1.10317800 |
| N | 2.93527300  | 0.53833100  | -0.57107800 |
| C | 4.25899500  | 0.44636300  | -0.04761500 |
| C | 5.35760100  | 0.64267200  | -0.88724700 |
| C | 4.44411200  | 0.08980100  | 1.28994800  |
| C | 6.64772900  | 0.50468700  | -0.37818300 |
| C | 5.74336700  | -0.06010500 | 1.78057700  |
| H | 3.58440400  | -0.05093100 | 1.93723200  |
| C | 6.84794000  | 0.14982800  | 0.95642700  |
| H | 7.85190600  | 0.03530500  | 1.34722300  |
| C | 5.94925600  | -0.50291300 | 3.20757700  |
| C | 7.83233000  | 0.78241000  | -1.26634200 |
| F | 5.91336500  | -1.84971400 | 3.31600400  |
| F | 4.99738100  | -0.01179000 | 4.02529900  |
| F | 7.14845700  | -0.10004600 | 3.68560500  |
| F | 7.56529200  | 0.49293600  | -2.55958500 |
| F | 8.91229600  | 0.05882100  | -0.90068300 |
| F | 8.19445700  | 2.08396900  | -1.22043500 |
| S | 3.20453300  | 3.17135000  | -1.11496200 |
| H | 5.20340700  | 0.88646200  | -1.93180200 |

|   |             |             |             |
|---|-------------|-------------|-------------|
| H | 2.33171400  | -0.27285000 | -0.36288700 |
| H | 0.55677100  | 0.71177700  | -1.30960400 |
| C | 0.99838300  | 3.91546200  | 0.88704200  |
| H | 0.83323300  | 4.95110500  | 0.57952100  |
| H | 1.94218000  | 3.63272800  | -0.07044200 |
| N | -0.82996500 | -0.73341100 | 1.44013800  |
| S | 0.67444500  | -1.05954100 | 1.79190100  |
| O | 1.28552600  | 0.00219300  | 2.61119300  |
| O | 1.49228800  | -1.55167900 | 0.64710900  |
| C | 0.56832300  | -2.53977100 | 2.92913500  |
| F | -0.00901700 | -3.56587900 | 2.30230000  |
| F | -0.15012600 | -2.23657600 | 4.01963200  |
| F | 1.79986100  | -2.89162100 | 3.31056300  |
| C | -1.87449200 | 3.34892700  | -2.90371600 |
| C | -2.59163600 | 2.13738400  | -2.90589100 |
| C | -2.31857000 | 4.36315600  | -3.76493900 |
| C | -3.70919400 | 1.95984000  | -3.71902000 |
| H | -2.26868500 | 1.30827800  | -2.28270900 |
| C | -3.43966400 | 4.18569200  | -4.58148100 |
| H | -1.80018000 | 5.31297700  | -3.81995300 |
| C | -4.14406300 | 2.98507400  | -4.56095400 |
| H | -4.23710900 | 1.01014100  | -3.69403600 |
| H | -3.75446300 | 4.99474100  | -5.23570800 |
| H | -5.01515000 | 2.84634000  | -5.19592500 |
| C | 0.01617300  | 4.90596800  | -2.12528800 |
| H | 1.02412300  | 4.88581400  | -1.70499000 |
| H | 0.16857000  | 5.09666600  | -3.19743300 |
| C | -0.75734900 | 6.04687700  | -1.50941600 |
| C | -0.19957300 | 7.07448900  | -0.85918600 |
| H | 0.88660800  | 7.09880700  | -0.74354300 |
| H | -1.84085200 | 6.03630200  | -1.62934500 |
| H | 0.02980900  | 2.04147900  | 1.02230600  |
| C | 1.77001700  | 3.71950400  | 2.18583200  |
| H | 1.87820600  | 2.65678300  | 2.42338200  |
| H | 2.76625300  | 4.17002700  | 2.12854000  |
| H | 1.23243300  | 4.19186300  | 3.01605200  |
| C | -0.94767000 | 8.24157500  | -0.28068000 |
| H | -0.76025600 | 8.34220900  | 0.79680900  |
| H | -0.62776200 | 9.18554100  | -0.74229300 |
| H | -2.02795000 | 8.14111700  | -0.43038800 |

TS-EF-4SR-2

l imaginary frequency

H = -5315.350501

G = -5315.553732

E(M06-2X-DCM) = -5316.233008

E(M06-2X-cyclohexane) = -5316.205869

|   |             |             |             |
|---|-------------|-------------|-------------|
| O | -1.73590900 | -2.22940200 | -1.02109400 |
| O | -3.14995500 | -0.32365000 | 0.02564600  |
| P | -1.60679400 | -0.78271500 | -0.26317900 |
| O | -0.98202400 | 0.28152800  | -1.10833500 |
| C | -3.54665300 | -2.13737200 | -4.79257000 |
| C | -4.31485000 | -2.23370200 | -3.63656400 |
| C | -3.70000200 | -2.34491900 | -2.38115000 |
| C | -1.50618000 | -2.18062300 | -3.43982400 |
| C | -2.15508500 | -2.14363200 | -4.68582700 |
| C | -4.00496300 | -1.14020200 | 0.76757900  |
| C | -4.61572300 | -2.23813700 | 0.15906800  |
| C | -5.34029300 | -3.14055500 | 0.95517900  |
| C | -5.54774100 | -2.89264400 | 2.30745600  |
| C | -5.03678000 | -1.72176800 | 2.86606500  |
| C | -4.25285300 | -0.82765600 | 2.11919600  |
| H | -1.54473800 | -2.09437600 | -5.58294300 |
| H | -5.22798900 | -1.49095100 | 3.90999400  |
| C | -4.74243800 | -2.64057400 | -1.31040300 |
| C | -6.00432200 | -1.98708300 | -1.97104400 |
| H | -5.99276700 | -0.91120400 | -1.76152700 |
| H | -6.94089300 | -2.39424900 | -1.57740300 |
| H | -6.87720200 | -4.27600300 | -0.07022800 |
| H | -5.62253800 | -5.28112400 | 0.64701600  |
| C | -2.31467200 | -2.25201200 | -2.28980500 |
| H | -4.01776600 | -2.06134900 | -5.76939900 |
| H | -6.11114100 | -3.59094800 | 2.92119400  |
| C | -5.82095700 | -2.22317100 | -3.48717800 |
| H | -6.29837400 | -1.44682400 | -4.09595900 |
| H | -6.25955800 | -3.18154300 | -3.79896400 |
| C | -5.79889700 | -4.32751500 | 0.13641000  |
| C | -4.96964600 | -4.18200700 | -1.15673800 |
| H | -3.99605600 | -4.66878200 | -1.02873100 |
| H | -5.45088400 | -4.62248600 | -2.03554600 |
| C | -3.78708300 | 0.43788800  | 2.77205400  |
| C | -2.83349700 | 0.39552200  | 3.81737000  |
| C | -4.40286000 | 1.66623200  | 2.42102000  |
| C | -2.17007000 | -0.81148700 | 4.20834000  |
| C | -2.49227800 | 1.60954100  | 4.52599900  |
| C | -4.04252500 | 2.87479500  | 3.12912800  |
| C | -1.25766000 | -0.82421300 | 5.22954800  |
| H | -2.37274200 | -1.71958400 | 3.65606500  |

|   |             |             |             |
|---|-------------|-------------|-------------|
| C | -1.54342000 | 1.54992700  | 5.59565200  |
| C | -3.09987600 | 2.81345500  | 4.16013700  |
| C | -0.94560500 | 0.36834200  | 5.94246400  |
| H | -0.74957100 | -1.74967000 | 5.48312300  |
| H | -1.31308300 | 2.46862800  | 6.13090300  |
| H | -2.84654100 | 3.72284300  | 4.70231900  |
| H | -0.22510200 | 0.33561600  | 6.75534200  |
| C | -0.01171300 | -2.16530300 | -3.37634500 |
| C | 0.70373800  | -1.02722500 | -3.82336500 |
| C | 0.68729700  | -3.31301900 | -2.92744600 |
| C | 0.05830400  | 0.17370000  | -4.26539300 |
| C | 2.14960300  | -1.04926800 | -3.83116300 |
| C | 2.13223200  | -3.31075200 | -2.91633900 |
| C | 0.78013400  | 1.24680700  | -4.72172300 |
| H | -1.02236600 | 0.23172900  | -4.22098000 |
| C | 2.86461000  | 0.09373100  | -4.31127500 |
| C | 2.82252500  | -2.18458200 | -3.37187700 |
| C | 2.20429100  | 1.20819500  | -4.75362700 |
| H | 0.26012800  | 2.13993500  | -5.05900800 |
| H | 3.95154900  | 0.05109700  | -4.32345300 |
| H | 3.91083400  | -2.19517500 | -3.37571100 |
| H | 2.75975500  | 2.06536100  | -5.12527800 |
| C | -6.00802900 | 2.96746000  | 1.11087700  |
| H | -6.77633000 | 3.01094000  | 0.34353800  |
| C | -5.41169700 | 1.76982500  | 1.40957900  |
| H | -5.71370900 | 0.87421700  | 0.87912100  |
| C | -5.63795800 | 4.15688000  | 1.80132700  |
| H | -6.12504300 | 5.09727800  | 1.55700400  |
| C | -4.68114800 | 4.10678400  | 2.78021100  |
| H | -4.39952500 | 5.00438700  | 3.32646800  |
| C | 0.73141700  | -5.59840000 | -2.06275900 |
| H | 0.20110100  | -6.48959700 | -1.73798700 |
| C | 2.15464700  | -5.58197600 | -2.03499400 |
| H | 2.69698200  | -6.45586900 | -1.68447700 |
| C | 2.83116300  | -4.46961300 | -2.45522000 |
| H | 3.91833000  | -4.44497000 | -2.44791100 |
| C | 0.02574700  | -4.50706700 | -2.49643800 |
| H | -1.05719900 | -4.54391200 | -2.51944300 |
| C | -0.34864700 | 3.95189600  | -0.55396300 |
| C | -0.85721600 | 3.18814600  | 0.71661200  |
| H | -1.43239900 | 3.89481000  | 1.32801100  |
| H | -1.54434200 | 2.40654400  | 0.38569700  |
| C | 0.16285500  | 2.55687800  | 1.61745900  |
| C | 0.66213600  | 3.04725500  | -1.34871100 |



|   |             |             |             |
|---|-------------|-------------|-------------|
| H | 1.49443700  | 3.65387000  | -1.70845700 |
| H | 0.15108300  | 2.61275100  | -2.20786800 |
| N | 1.21509100  | 1.87371400  | -0.64765600 |
| C | 2.49478500  | 1.70825900  | -0.27026000 |
| N | 2.96617700  | 0.45194500  | -0.16321800 |
| C | 4.25240800  | 0.08158100  | 0.32960400  |
| C | 4.34001800  | -0.77004000 | 1.43294400  |
| C | 5.40793100  | 0.50802300  | -0.32907500 |
| C | 5.59834700  | -1.18230000 | 1.87728700  |
| C | 6.65649200  | 0.09724700  | 0.13430200  |
| H | 5.33084100  | 1.15028200  | -1.19836900 |
| C | 6.75929400  | -0.75051800 | 1.23815400  |
| H | 7.73141900  | -1.07222400 | 1.59227100  |
| C | 7.89955900  | 0.50549600  | -0.61235300 |
| C | 5.69822300  | -2.04890700 | 3.10760200  |
| F | 8.21581800  | -0.39124800 | -1.57560400 |
| F | 8.96829000  | 0.59569100  | 0.20753700  |
| F | 7.74813800  | 1.70068100  | -1.22266900 |
| F | 5.68645700  | -1.30397700 | 4.23669500  |
| F | 6.84424100  | -2.76610300 | 3.12029500  |
| F | 4.67086500  | -2.91580300 | 3.19262700  |
| S | 3.40182100  | 3.08461100  | 0.27431900  |
| H | 3.43682500  | -1.09491000 | 1.93924700  |
| H | 2.30423900  | -0.33332100 | -0.27090700 |
| H | 0.62078500  | 1.03881900  | -0.80040700 |
| C | 1.15036200  | 3.19680800  | 2.35454100  |
| H | 1.05920200  | 4.28099200  | 2.45803000  |
| H | 2.12775500  | 3.22695700  | 1.39164000  |
| N | -0.97927300 | -1.12577500 | 1.19297500  |
| S | 0.48037800  | -1.68163100 | 1.40869200  |
| O | 1.14420400  | -1.04262200 | 2.56011500  |
| O | 1.30044900  | -1.79501600 | 0.16876700  |
| C | 0.22584400  | -3.45559100 | 1.94048200  |
| F | -0.50011900 | -3.49856800 | 3.06781500  |
| F | 1.41328300  | -4.02237500 | 2.17357400  |
| F | -0.41082600 | -4.14125000 | 0.98997700  |
| C | -1.55053800 | 4.29758600  | -1.46052500 |
| C | -1.36109900 | 4.53568500  | -2.83422600 |
| C | -2.84993700 | 4.44956700  | -0.95529200 |
| C | -2.42143800 | 4.89559400  | -3.66553100 |
| H | -0.36957000 | 4.45595500  | -3.26846900 |
| C | -3.91409500 | 4.80758600  | -1.78568400 |
| H | -3.06400000 | 4.27929900  | 0.09358400  |
| C | -3.70846300 | 5.03137200  | -3.14521100 |

|   |             |            |             |
|---|-------------|------------|-------------|
| H | -2.23695900 | 5.06971900 | -4.72254300 |
| H | -4.90828000 | 4.90166900 | -1.35769400 |
| H | -4.53767300 | 5.30698400 | -3.79119300 |
| C | 0.33676500  | 5.30268200 | -0.12211700 |
| H | -0.37669300 | 5.82578800 | 0.53052100  |
| H | 1.22033200  | 5.07637300 | 0.47803100  |
| C | 0.74874200  | 6.23371000 | -1.23230600 |
| C | 2.01580200  | 6.53105600 | -1.54248100 |
| H | 2.82138300  | 6.05959900 | -0.97723200 |
| H | -0.05477300 | 6.70676200 | -1.79539900 |
| H | 0.08208400  | 1.47773100 | 1.74454400  |
| C | 2.43710900  | 7.48744400 | -2.62133900 |
| H | 3.02392200  | 8.31849100 | -2.20697500 |
| H | 3.07905500  | 6.99334900 | -3.36314800 |
| H | 1.57380500  | 7.91080700 | -3.14584900 |
| C | 1.83796400  | 2.48138500 | 3.51056200  |
| H | 1.89241400  | 1.40389500 | 3.32864600  |
| H | 2.85169600  | 2.86414600 | 3.66669100  |
| H | 1.27054000  | 2.63211100 | 4.43585700  |

TS-EF-4RS

l imaginary frequency

H = -5315.353945

G = -5315.554544

E(M06-2X-DCM) = -5316.232789

E(M06-2X-cyclohexane) = -5316.204734

|   |            |             |             |
|---|------------|-------------|-------------|
| O | 0.94111400 | -2.92268300 | -0.11941600 |
| O | 2.73320100 | -1.07705300 | -0.35956200 |
| P | 1.12225800 | -1.29828700 | -0.23728300 |
| O | 0.66795400 | -0.57937700 | 0.99570300  |
| C | 2.84636100 | -4.87200200 | 3.05782500  |
| C | 3.51969900 | -4.63102800 | 1.86467600  |
| C | 2.86371200 | -4.02916800 | 0.78006200  |
| C | 0.83724100 | -3.83014700 | 2.12982100  |
| C | 1.50950600 | -4.49009300 | 3.17174700  |
| C | 3.41547000 | -1.57785900 | -1.46959900 |
| C | 3.74790000 | -2.92988500 | -1.52392900 |
| C | 4.24786400 | -3.45742700 | -2.72527100 |
| C | 4.53675200 | -2.62373400 | -3.80062200 |
| C | 4.33134300 | -1.24904500 | -3.66928800 |
| C | 3.75586800 | -0.69625400 | -2.51430800 |
| H | 0.96918700 | -4.68020800 | 4.09470300  |
| H | 4.59715700 | -0.58162600 | -4.48388100 |
| C | 3.77514700 | -4.00987900 | -0.44328800 |

|   |              |              |              |
|---|--------------|--------------|--------------|
| C | 5. 17617300  | -4. 04021200 | 0. 26214700  |
| H | 5. 44095600  | -3. 01889900 | 0. 55922800  |
| H | 5. 96736700  | -4. 41133200 | -0. 39641300 |
| H | 5. 43605200  | -5. 26723900 | -2. 55223300 |
| H | 3. 96994800  | -5. 47606700 | -3. 50314700 |
| C | 1. 54932400  | -3. 59541300 | 0. 93798500  |
| H | 3. 35219600  | -5. 34472100 | 3. 89598500  |
| H | 4. 93098700  | -3. 02992300 | -4. 72883700 |
| C | 4. 96679100  | -4. 90662000 | 1. 52177300  |
| H | 5. 65089900  | -4. 64287200 | 2. 33632400  |
| H | 5. 12860900  | -5. 97230900 | 1. 30596000  |
| C | 4. 38268200  | -4. 96275100 | -2. 62704300 |
| C | 3. 60826800  | -5. 28801000 | -1. 32918200 |
| H | 2. 54432600  | -5. 42280400 | -1. 55522000 |
| H | 3. 96248700  | -6. 19431700 | -0. 82751800 |
| C | 3. 57095500  | 0. 78434500  | -2. 39575100 |
| C | 2. 67111400  | 1. 46902700  | -3. 24869200 |
| C | 4. 35273100  | 1. 50755100  | -1. 45867700 |
| C | 1. 84376200  | 0. 79814500  | -4. 20593700 |
| C | 2. 54917700  | 2. 90694700  | -3. 14991200 |
| C | 4. 20440600  | 2. 94165700  | -1. 35895900 |
| C | 0. 99063800  | 1. 49267700  | -5. 02201700 |
| H | 1. 87192700  | -0. 28329500 | -4. 25485200 |
| C | 1. 64634700  | 3. 59401700  | -4. 02145700 |
| C | 3. 30781700  | 3. 60110600  | -2. 20416900 |
| C | 0. 89381900  | 2. 91058400  | -4. 93837300 |
| H | 0. 36039300  | 0. 95358800  | -5. 72302200 |
| H | 1. 57867500  | 4. 67672000  | -3. 93996800 |
| H | 3. 19096200  | 4. 67917700  | -2. 11784000 |
| H | 0. 21479100  | 3. 44379400  | -5. 59896800 |
| C | -0. 58646600 | -3. 40992100 | 2. 32009900  |
| C | -0. 89934200 | -2. 38829500 | 3. 24947800  |
| C | -1. 62004200 | -4. 07127400 | 1. 61381500  |
| C | 0. 10356700  | -1. 65337900 | 3. 96211900  |
| C | -2. 28117000 | -2. 03768900 | 3. 48748500  |
| C | -2. 99623600 | -3. 69507100 | 1. 84313800  |
| C | -0. 22915700 | -0. 67086800 | 4. 85854600  |
| H | 1. 14616100  | -1. 87293900 | 3. 76694700  |
| C | -2. 58662700 | -1. 01401100 | 4. 44034000  |
| C | -3. 28961200 | -2. 69814200 | 2. 77873000  |
| C | -1. 59463200 | -0. 34967200 | 5. 11001500  |
| H | 0. 55578700  | -0. 12321800 | 5. 37395200  |
| H | -3. 63285200 | -0. 77642300 | 4. 62178700  |
| H | -4. 32998500 | -2. 43456900 | 2. 96112800  |

|   |             |             |             |
|---|-------------|-------------|-------------|
| H | -1.84170300 | 0.42576200  | 5.83035100  |
| C | 6.04666700  | 1.61083200  | 0.30342100  |
| H | 6.76609100  | 1.10796500  | 0.94403900  |
| C | 5.31541500  | 0.88498400  | -0.59987100 |
| H | 5.46884400  | -0.18539100 | -0.67421500 |
| C | 5.87662400  | 3.01974900  | 0.41328900  |
| H | 6.46180200  | 3.57751800  | 1.13951100  |
| C | 4.98502900  | 3.66332400  | -0.40152600 |
| H | 4.84263500  | 4.73855800  | -0.33013100 |
| C | -2.39001600 | -5.74615500 | 0.01061000  |
| H | -2.16888600 | -6.54265400 | -0.69481300 |
| C | -3.74237400 | -5.35659200 | 0.22588900  |
| H | -4.53907700 | -5.85400400 | -0.32077300 |
| C | -4.03361700 | -4.36175200 | 1.11915600  |
| H | -5.06198100 | -4.05310100 | 1.29124100  |
| C | -1.36797900 | -5.12757200 | 0.68113700  |
| H | -0.34437100 | -5.43953500 | 0.50819300  |
| N | 0.50963200  | -0.91890200 | -1.68645800 |
| S | -1.00767000 | -1.00617500 | -2.09292700 |
| O | -1.37905700 | 0.03982200  | -3.06127000 |
| O | -1.95365100 | -1.19737900 | -0.95455400 |
| C | -1.15360200 | -2.58987800 | -3.07597400 |
| F | -0.32675700 | -2.54509200 | -4.12793200 |
| F | -2.41027200 | -2.72030800 | -3.52112100 |
| F | -0.84655900 | -3.65005700 | -2.32680900 |
| C | -5.15049300 | 1.01602200  | -0.08626200 |
| C | -4.52482200 | 1.15623600  | -1.50771000 |
| H | -5.33437400 | 1.43279200  | -2.19815100 |
| H | -4.13699900 | 0.18184400  | -1.81304300 |
| C | -3.42041400 | 2.14953900  | -1.69533600 |
| C | -4.00409600 | 0.77337400  | 0.97062300  |
| H | -4.21638700 | 1.33614000  | 1.88150700  |
| H | -3.97460700 | -0.28865400 | 1.22281900  |
| N | -2.63079700 | 1.09362800  | 0.54984500  |
| C | -1.85750400 | 2.07684200  | 1.07043300  |
| N | -0.54570500 | 1.82675400  | 1.16837800  |
| C | 0.49025800  | 2.72047100  | 1.55673000  |
| C | 0.67949900  | 3.96692700  | 0.95825000  |
| C | 1.38759500  | 2.26230600  | 2.52671400  |
| C | 1.74711500  | 4.76723900  | 1.36586700  |
| C | 2.45017200  | 3.07225100  | 2.92106800  |
| H | 1.24732900  | 1.27835500  | 2.95920800  |
| C | 2.63204000  | 4.33244600  | 2.35182900  |
| H | 3.45941000  | 4.95922100  | 2.66133300  |

|   |             |             |             |
|---|-------------|-------------|-------------|
| C | 3.44528400  | 2.56193500  | 3.93090600  |
| C | 1.92316800  | 6.12972100  | 0.74967300  |
| F | 2.89019500  | 1.65863200  | 4.77085600  |
| F | 4.49734700  | 1.95855400  | 3.33834800  |
| F | 3.94217200  | 3.56692100  | 4.68732300  |
| F | 1.20894200  | 7.07419600  | 1.40077900  |
| F | 3.21578600  | 6.53005000  | 0.77174100  |
| F | 1.51701600  | 6.15296500  | -0.54181600 |
| S | -2.58125600 | 3.60642900  | 1.44220800  |
| H | 0.01593700  | 4.30438900  | 0.17337100  |
| H | -0.21478700 | 0.83776400  | 1.07516300  |
| H | -2.14806100 | 0.27745100  | 0.14335400  |
| C | -3.48059200 | 3.52289200  | -1.48783400 |
| H | -4.47985700 | 3.95189300  | -1.38307500 |
| H | -3.16440400 | 3.54173100  | -0.17811200 |
| C | -5.97222500 | 2.28462100  | 0.32634900  |
| H | -5.30064800 | 3.12929500  | 0.49959000  |
| H | -6.41927200 | 2.06297300  | 1.30577600  |
| C | -6.10980300 | -0.19430500 | -0.03744000 |
| C | -6.50332200 | -0.92103900 | -1.16896900 |
| C | -6.64076600 | -0.59118800 | 1.20384400  |
| C | -7.38453700 | -2.00131900 | -1.06612900 |
| H | -6.12396900 | -0.66243500 | -2.15087200 |
| C | -7.51706700 | -1.66958500 | 1.31177400  |
| H | -6.36899000 | -0.05099200 | 2.10732600  |
| C | -7.89517400 | -2.38293500 | 0.17228500  |
| H | -7.66608300 | -2.54469100 | -1.96405000 |
| H | -7.90805400 | -1.94816500 | 2.28688100  |
| H | -8.58051300 | -3.22227300 | 0.25089200  |
| C | -7.06859700 | 2.67403100  | -0.62815600 |
| C | -7.29655600 | 3.91633000  | -1.06842700 |
| H | -6.64268300 | 4.72445100  | -0.73217400 |
| H | -7.73728300 | 1.87316700  | -0.94718200 |
| H | -2.49364100 | 1.73538500  | -2.09422300 |
| C | -8.41756300 | 4.31864000  | -1.98370000 |
| H | -8.03617800 | 4.79172800  | -2.89855300 |
| H | -9.02763000 | 3.45721800  | -2.27511900 |
| H | -9.07641400 | 5.05420400  | -1.50293300 |
| C | -2.44114700 | 4.44406700  | -2.11607600 |
| H | -2.27391500 | 5.33445900  | -1.50075400 |
| H | -1.48298400 | 3.93192800  | -2.25425800 |
| H | -2.78109300 | 4.78169200  | -3.10196500 |

l imaginary frequency

H = -5315.351724

G = -5315.552694

E(M06-2X-DCM) = -5316.232179

E(M06-2X-cyclohexane) = -5316.203410

|   |            |             |             |
|---|------------|-------------|-------------|
| O | 0.82049500 | -2.93468800 | -0.07400500 |
| O | 2.71083400 | -1.18947700 | -0.31333700 |
| P | 1.08895600 | -1.32413600 | -0.21212100 |
| O | 0.65430600 | -0.56328200 | 1.00258500  |
| C | 2.57002600 | -4.92819000 | 3.16490800  |
| C | 3.27423300 | -4.74168600 | 1.97984900  |
| C | 2.66763600 | -4.12506400 | 0.87500100  |
| C | 0.63246900 | -3.80013500 | 2.18660700  |
| C | 1.25284200 | -4.47672600 | 3.24987600  |
| C | 3.38175700 | -1.74425800 | -1.40464900 |
| C | 3.64350000 | -3.11258000 | -1.43166200 |
| C | 4.13328500 | -3.68604800 | -2.61602300 |
| C | 4.48128600 | -2.88723100 | -3.70029800 |
| C | 4.34592900 | -1.50170200 | -3.59492100 |
| C | 3.78312200 | -0.89982100 | -2.45836000 |
| H | 0.68842800 | -4.62397800 | 4.16621900  |
| H | 4.65827100 | -0.86314800 | -4.41611300 |
| C | 3.59792800 | -4.17372000 | -0.33313300 |
| C | 4.98422200 | -4.26394600 | 0.39572900  |
| H | 5.29684800 | -3.25262000 | 0.68023200  |
| H | 5.76531900 | -4.68666400 | -0.24350500 |
| H | 5.22358600 | -5.55115800 | -2.39399300 |
| H | 3.76328600 | -5.70094500 | -3.36477500 |
| C | 1.37518100 | -3.62149500 | 1.00379500  |
| H | 3.03709600 | -5.41229400 | 4.01892000  |
| H | 4.86769100 | -3.32934600 | -4.61529300 |
| C | 4.71064500 | -5.09651100 | 1.66592900  |
| H | 5.39422200 | -4.85364600 | 2.48738800  |
| H | 4.82123600 | -6.17266700 | 1.47072400  |
| C | 4.18857900 | -5.19435800 | -2.49076200 |
| C | 3.37881600 | -5.45680500 | -1.20034800 |
| H | 2.31290500 | -5.54087800 | -1.44120400 |
| H | 3.67814700 | -6.37117000 | -0.67799400 |
| C | 3.67474000 | 0.59027000  | -2.36755700 |
| C | 2.82418100 | 1.30599000  | -3.24523000 |
| C | 4.48067800 | 1.28791400  | -1.43165500 |
| C | 1.97613900 | 0.66253300  | -4.20318300 |
| C | 2.77709000 | 2.74986300  | -3.17294100 |
| C | 4.40743100 | 2.72942100  | -1.35905100 |

|   |              |              |              |
|---|--------------|--------------|--------------|
| C | 1. 17243100  | 1. 38627200  | -5. 04367400 |
| H | 1. 94788300  | -0. 41959300 | -4. 23312500 |
| C | 1. 92382300  | 3. 46777700  | -4. 06922500 |
| C | 3. 55869500  | 3. 41995500  | -2. 22853400 |
| C | 1. 14924100  | 2. 80858400  | -4. 98552300 |
| H | 0. 52467900  | 0. 86861600  | -5. 74488800 |
| H | 1. 91210100  | 4. 55380300  | -4. 00705400 |
| H | 3. 49873100  | 4. 50415100  | -2. 16326600 |
| H | 0. 50868800  | 3. 36488000  | -5. 66524800 |
| C | -0. 77067000 | -3. 30470200 | 2. 34618600  |
| C | -1. 04575300 | -2. 25418900 | 3. 25510500  |
| C | -1. 82519600 | -3. 92308200 | 1. 63190000  |
| C | -0. 01813100 | -1. 55992100 | 3. 97330100  |
| C | -2. 41152600 | -1. 83023900 | 3. 46480800  |
| C | -3. 18376400 | -3. 47332400 | 1. 83199200  |
| C | -0. 31454200 | -0. 54782600 | 4. 84932600  |
| H | 1. 01491300  | -1. 83489100 | 3. 79868500  |
| C | -2. 67953300 | -0. 77790600 | 4. 39753700  |
| C | -3. 44089700 | -2. 44904900 | 2. 74854500  |
| C | -1. 66572300 | -0. 15418000 | 5. 07357500  |
| H | 0. 48901700  | -0. 03254000 | 5. 36939800  |
| H | -3. 71507400 | -0. 48499600 | 4. 55818800  |
| H | -4. 46925100 | -2. 13017500 | 2. 90934900  |
| H | -1. 88437300 | 0. 64385500  | 5. 77824600  |
| C | 6. 15376000  | 1. 33326800  | 0. 35264200  |
| H | 6. 83667400  | 0. 80471600  | 1. 01226300  |
| C | 5. 39705800  | 0. 63087300  | -0. 54821500 |
| H | 5. 49416400  | -0. 44731800 | -0. 60153500 |
| C | 6. 05763200  | 2. 75099800  | 0. 43531800  |
| H | 6. 66193400  | 3. 29011900  | 1. 15995900  |
| C | 5. 21243100  | 3. 42598100  | -0. 40321700 |
| H | 5. 12635800  | 4. 50832600  | -0. 35259500 |
| C | -2. 65394500 | -5. 57988600 | 0. 03933100  |
| H | -2. 46261300 | -6. 39726500 | -0. 65076500 |
| C | -3. 98770100 | -5. 11774800 | 0. 22516000  |
| H | -4. 79976700 | -5. 58128200 | -0. 32862100 |
| C | -4. 24207700 | -4. 09605800 | 1. 09919700  |
| H | -5. 25572500 | -3. 73190600 | 1. 24851700  |
| C | -1. 61255600 | -5. 00490900 | 0. 71886700  |
| H | -0. 60373100 | -5. 37184400 | 0. 56832700  |
| N | 0. 51873700  | -0. 93513000 | -1. 67620600 |
| S | -0. 99442200 | -0. 94838500 | -2. 10474900 |
| O | -1. 29629200 | 0. 10198300  | -3. 09263900 |
| O | -1. 96641000 | -1. 07352900 | -0. 97889300 |

|   |             |             |             |
|---|-------------|-------------|-------------|
| C | -1.20986500 | -2.53582200 | -3.06869700 |
| F | -0.36874500 | -2.54822100 | -4.11017600 |
| F | -2.46594500 | -2.60725700 | -3.52853600 |
| F | -0.96739400 | -3.59970900 | -2.30148000 |
| C | -5.07672700 | 1.29218900  | -0.17527500 |
| C | -4.41506200 | 1.34591000  | -1.58520500 |
| H | -5.19422200 | 1.60386900  | -2.31576500 |
| H | -4.05119800 | 0.34599900  | -1.83298500 |
| C | -3.27445900 | 2.29548600  | -1.78727500 |
| C | -3.95423200 | 1.03181700  | 0.90339700  |
| H | -4.14496600 | 1.63758100  | 1.79109600  |
| H | -3.97953500 | -0.02061500 | 1.19334600  |
| N | -2.56337200 | 1.27021700  | 0.48272500  |
| C | -1.74119900 | 2.22072900  | 0.99236500  |
| N | -0.44621600 | 1.90118700  | 1.10929700  |
| C | 0.63159100  | 2.74568400  | 1.49500500  |
| C | 0.89450000  | 3.96849800  | 0.87603200  |
| C | 1.48992100  | 2.26004400  | 2.48661600  |
| C | 1.99683500  | 4.71976900  | 1.28454800  |
| C | 2.58808000  | 3.02084600  | 2.88141900  |
| H | 1.29218600  | 1.29345900  | 2.93543600  |
| C | 2.84383200  | 4.25852300  | 2.29155600  |
| H | 3.69845800  | 4.84718500  | 2.60188400  |
| C | 3.54049100  | 2.47944700  | 3.91599200  |
| C | 2.25193300  | 6.05960400  | 0.64672500  |
| F | 2.92752100  | 1.62078400  | 4.76241300  |
| F | 4.56963100  | 1.81321800  | 3.35125100  |
| F | 4.07595400  | 3.47184200  | 4.66269700  |
| F | 1.58300000  | 7.05233300  | 1.27362600  |
| F | 3.56389000  | 6.39067800  | 0.67608600  |
| F | 1.86059600  | 6.08139600  | -0.64929400 |
| S | -2.38363300 | 3.79433100  | 1.32296300  |
| H | 0.26046300  | 4.32499700  | 0.07534700  |
| H | -0.16725700 | 0.89449400  | 1.03969600  |
| H | -2.12036400 | 0.42127500  | 0.09822800  |
| C | -3.27140700 | 3.67682100  | -1.60903200 |
| H | -4.24505300 | 4.16323700  | -1.51135300 |
| H | -2.95512900 | 3.71832000  | -0.31041300 |
| C | -5.83829700 | 2.61757900  | 0.18342000  |
| H | -5.10321300 | 3.40922100  | 0.36106500  |
| H | -6.33484800 | 2.45865500  | 1.14706700  |
| C | -6.09617000 | 0.13651200  | -0.10012600 |
| C | -6.52508100 | -0.59470800 | -1.21459300 |
| C | -6.64916300 | -0.20167600 | 1.14840800  |



|   |             |             |             |
|---|-------------|-------------|-------------|
| C | -7.46123600 | -1.62482000 | -1.08899800 |
| H | -6.13203300 | -0.37896800 | -2.20143900 |
| C | -7.58202900 | -1.22911100 | 1.27965400  |
| H | -6.35077400 | 0.34522200  | 2.03957100  |
| C | -7.99436600 | -1.94913100 | 0.15638200  |
| H | -7.76937600 | -2.17399700 | -1.97462800 |
| H | -7.98901000 | -1.46323100 | 2.25997200  |
| H | -8.72299400 | -2.74931900 | 0.25268200  |
| C | -6.86061700 | 3.07543800  | -0.82216700 |
| C | -8.18397500 | 3.03216500  | -0.64135200 |
| H | -8.57057900 | 2.62812800  | 0.29577200  |
| H | -6.48294600 | 3.48166600  | -1.76312100 |
| H | -2.36428200 | 1.83686300  | -2.17605400 |
| C | -9.21075400 | 3.49741700  | -1.63240300 |
| H | -9.84380200 | 4.28782700  | -1.20717800 |
| H | -8.74601400 | 3.88851300  | -2.54391000 |
| H | -9.88329700 | 2.67746800  | -1.91784200 |
| C | -2.19236600 | 4.53181500  | -2.26563400 |
| H | -1.98884800 | 5.43351400  | -1.67865600 |
| H | -1.25695800 | 3.97449900  | -2.38280100 |
| H | -2.51530900 | 4.85078700  | -3.26328800 |

TS-EF-4RS-2

l imaginary frequency

H = -5315.353454

G = -5315.553239

E(M06-2X-DCM) = -5316.229978

E(M06-2X-cyclohexane) = -5316.202693

|   |            |             |             |
|---|------------|-------------|-------------|
| O | 0.73442600 | -2.95699100 | 0.15033000  |
| O | 2.61791500 | -1.22065200 | -0.18811000 |
| P | 0.99457200 | -1.36351100 | -0.12988400 |
| O | 0.50708500 | -0.49199500 | 0.98491900  |
| C | 2.43408200 | -4.65554400 | 3.57922300  |
| C | 3.15885700 | -4.56676900 | 2.39528300  |
| C | 2.57116000 | -4.04787200 | 1.23154500  |
| C | 0.50979300 | -3.62755100 | 2.47301100  |
| C | 1.11381700 | -4.20634100 | 3.60149700  |
| C | 3.32775900 | -1.85268500 | -1.21061700 |
| C | 3.59313200 | -3.21751000 | -1.12637700 |
| C | 4.11547200 | -3.87744700 | -2.25008600 |
| C | 4.49362600 | -3.16103300 | -3.38097300 |
| C | 4.35775800 | -1.77128500 | -3.38232900 |
| C | 3.76239700 | -1.08761600 | -2.31046700 |
| H | 0.53271300 | -4.27925400 | 4.51632100  |

|   |             |             |             |
|---|-------------|-------------|-------------|
| H | 4.69616800  | -1.19506900 | -4.23857600 |
| C | 3.52555700  | -4.18994000 | 0.04972500  |
| C | 4.89762100  | -4.21527400 | 0.81062800  |
| H | 5.20212300  | -3.18290800 | 1.01793100  |
| H | 5.69213300  | -4.68536800 | 0.22315200  |
| H | 5.20035800  | -5.71885300 | -1.86263500 |
| H | 3.76161400  | -5.94417200 | -2.85053900 |
| C | 1.27373700  | -3.54338500 | 1.29347500  |
| H | 2.88733500  | -5.06297800 | 4.47941900  |
| H | 4.90534000  | -3.66931600 | -4.24936100 |
| C | 4.60116900  | -4.94237100 | 2.13863300  |
| H | 5.26900100  | -4.63225600 | 2.95031600  |
| H | 4.71584000  | -6.03061400 | 2.03329400  |
| C | 4.16783500  | -5.37189800 | -2.00858100 |
| C | 3.32960500  | -5.53728400 | -0.71963000 |
| H | 2.26965900  | -5.64509500 | -0.97673300 |
| H | 3.62017900  | -6.40693700 | -0.12146300 |
| C | 3.65739900  | 0.40532300  | -2.32685000 |
| C | 2.83792900  | 1.06158800  | -3.27738500 |
| C | 4.43601300  | 1.16358400  | -1.41497200 |
| C | 2.01637400  | 0.35590800  | -4.21440000 |
| C | 2.79597700  | 2.50724200  | -3.30596300 |
| C | 4.36556600  | 2.60681900  | -1.44195900 |
| C | 1.24293100  | 1.02185500  | -5.12809600 |
| H | 1.98531200  | -0.72565800 | -4.17080200 |
| C | 1.97657600  | 3.16375300  | -4.27797000 |
| C | 3.54892300  | 3.23851100  | -2.38393100 |
| C | 1.22719600  | 2.44486100  | -5.17042800 |
| H | 0.61503800  | 0.45881100  | -5.81214600 |
| H | 1.97193000  | 4.25156000  | -4.29462700 |
| H | 3.49060900  | 4.32477100  | -2.39296100 |
| H | 0.61342300  | 2.95475000  | -5.90878300 |
| C | -0.90320500 | -3.14218600 | 2.56697400  |
| C | -1.20876500 | -2.01593400 | 3.36875000  |
| C | -1.93911300 | -3.85461000 | 1.91616800  |
| C | -0.20288800 | -1.23871800 | 4.03026100  |
| C | -2.58487000 | -1.60301500 | 3.52700400  |
| C | -3.31025900 | -3.42828300 | 2.07840000  |
| C | -0.52929000 | -0.15602600 | 4.80537700  |
| H | 0.83723100  | -1.50963100 | 3.89515600  |
| C | -2.88384200 | -0.46988000 | 4.34866600  |
| C | -3.59615500 | -2.31820700 | 2.87867800  |
| C | -1.88982500 | 0.23316200  | 4.97390600  |
| H | 0.25801800  | 0.41964600  | 5.28479100  |

|   |             |             |             |
|---|-------------|-------------|-------------|
| H | -3.92605600 | -0.18093600 | 4.46581900  |
| H | -4.63239000 | -2.01139300 | 3.00943500  |
| H | -2.13120500 | 1.09107100  | 5.59589900  |
| C | 6.04920400  | 1.32680900  | 0.41694200  |
| H | 6.70806100  | 0.84297600  | 1.13289200  |
| C | 5.32086800  | 0.56639300  | -0.45981500 |
| H | 5.41657400  | -0.51296100 | -0.43772600 |
| C | 5.95488500  | 2.74689200  | 0.40119800  |
| H | 6.53663600  | 3.33296000  | 1.10762900  |
| C | 5.14055400  | 3.36510600  | -0.50859400 |
| H | 5.05692200  | 4.44847100  | -0.53275600 |
| C | -2.72067000 | -5.69300200 | 0.50777700  |
| H | -2.50562400 | -6.56925200 | -0.09778900 |
| C | -4.06961200 | -5.26599100 | 0.66810300  |
| H | -4.87077300 | -5.82250800 | 0.18859000  |
| C | -4.35188200 | -4.16620500 | 1.43323100  |
| H | -5.37781100 | -3.83239100 | 1.56897800  |
| C | -1.69562700 | -5.01440500 | 1.11257600  |
| H | -0.67547500 | -5.35900300 | 0.98788500  |
| N | 0.47402400  | -1.12850000 | -1.64722600 |
| S | -1.02928900 | -1.15714300 | -2.10310900 |
| O | -1.29551400 | -0.20904200 | -3.19862700 |
| O | -2.01975900 | -1.14271300 | -0.98400400 |
| C | -1.27456800 | -2.83406900 | -2.89257900 |
| F | -0.42919800 | -2.97742300 | -3.91943400 |
| F | -2.53018300 | -2.92710200 | -3.34895200 |
| F | -1.05984900 | -3.81210000 | -2.01100700 |
| C | -5.04869800 | 1.44657600  | -0.91841900 |
| C | -4.22412400 | 1.51958200  | -2.26385700 |
| H | -4.93202200 | 1.83990500  | -3.04162400 |
| H | -3.89895200 | 0.51045100  | -2.52136000 |
| C | -3.01884000 | 2.40106500  | -2.32843700 |
| C | -4.08821800 | 1.26394900  | 0.31679100  |
| H | -4.36232200 | 1.98855000  | 1.08322200  |
| H | -4.21396600 | 0.26858600  | 0.74572200  |
| N | -2.64481500 | 1.40428200  | 0.05986100  |
| C | -1.84234100 | 2.35045200  | 0.60844600  |
| N | -0.57135900 | 1.99610700  | 0.85159200  |
| C | 0.50569900  | 2.82728500  | 1.26647900  |
| C | 0.83247600  | 4.02014000  | 0.61950700  |
| C | 1.30219000  | 2.35777500  | 2.31621200  |
| C | 1.93169100  | 4.75966700  | 1.05605500  |
| C | 2.40005700  | 3.10539600  | 2.73690300  |
| H | 1.05939000  | 1.41234900  | 2.78687400  |

|   |              |              |              |
|---|--------------|--------------|--------------|
| C | 2. 71667600  | 4. 31506800  | 2. 11890700  |
| H | 3. 57055900  | 4. 89323600  | 2. 45026400  |
| C | 3. 29260500  | 2. 57761000  | 3. 82999600  |
| C | 2. 24943600  | 6. 06848200  | 0. 38345700  |
| F | 2. 62721900  | 1. 75279300  | 4. 67111000  |
| F | 4. 33504900  | 1. 87903300  | 3. 33250300  |
| F | 3. 81061700  | 3. 58148500  | 4. 57377000  |
| F | 1. 56220600  | 7. 09645000  | 0. 92835400  |
| F | 3. 56291800  | 6. 37984900  | 0. 47828600  |
| F | 1. 93620600  | 6. 04441000  | -0. 93437600 |
| S | -2. 45235600 | 3. 95513000  | 0. 83104000  |
| H | 0. 24931700  | 4. 36355600  | -0. 22392800 |
| H | -0. 32077500 | 0. 98190300  | 0. 85555700  |
| H | -2. 20272200 | 0. 51079700  | -0. 20703900 |
| C | -2. 97708200 | 3. 78908900  | -2. 18943600 |
| H | -3. 93668100 | 4. 30825300  | -2. 26018800 |
| H | -2. 83939200 | 3. 85417700  | -0. 88623000 |
| C | -5. 85457300 | 2. 76874500  | -0. 70577900 |
| H | -6. 46703100 | 2. 95275900  | -1. 59949400 |
| H | -5. 14679500 | 3. 59886900  | -0. 64366400 |
| C | -5. 97853200 | 0. 22199900  | -1. 09441900 |
| C | -5. 45222000 | -1. 07870800 | -1. 00046300 |
| C | -7. 32822800 | 0. 34958600  | -1. 45676600 |
| C | -6. 24907000 | -2. 20003300 | -1. 22961400 |
| H | -4. 40031800 | -1. 23457900 | -0. 77917900 |
| C | -8. 12918200 | -0. 77249700 | -1. 68334600 |
| H | -7. 78036100 | 1. 32854400  | -1. 56986000 |
| C | -7. 59564600 | -2. 05405200 | -1. 56539400 |
| H | -5. 80385000 | -3. 18744700 | -1. 14813900 |
| H | -9. 17267300 | -0. 63631300 | -1. 95543300 |
| H | -8. 21771800 | -2. 92735600 | -1. 74221500 |
| C | -6. 71897100 | 2. 80876800  | 0. 53062600  |
| C | -6. 61244700 | 3. 73040600  | 1. 49400000  |
| H | -5. 84540100 | 4. 50158100  | 1. 40403800  |
| H | -7. 47942800 | 2. 03520700  | 0. 62991900  |
| H | -2. 08562200 | 1. 88512800  | -2. 55656700 |
| C | -7. 47874300 | 3. 80277500  | 2. 71840800  |
| H | -8. 02242300 | 4. 75618400  | 2. 76301500  |
| H | -8. 21399300 | 2. 99145000  | 2. 74216300  |
| H | -6. 87569800 | 3. 74473800  | 3. 63437500  |
| C | -1. 78413400 | 4. 57875700  | -2. 72032400 |
| H | -1. 62468700 | 5. 49365200  | -2. 14049100 |
| H | -0. 86559700 | 3. 98333900  | -2. 69180700 |
| H | -1. 95690300 | 4. 87014500  | -3. 76251200 |

TS-EF-4RS-3

1 imaginary frequency

H = -5315.350764

G = -5315.551404

E(M06-2X-DCM) = -5316.229399

E(M06-2X-cyclohexane) = -5316.201336

|   |            |             |             |
|---|------------|-------------|-------------|
| O | 0.73973700 | -2.95947600 | 0.16640400  |
| O | 2.66400800 | -1.24820400 | -0.03542800 |
| P | 1.03862900 | -1.36968600 | -0.09685100 |
| O | 0.48531800 | -0.49368800 | 0.98463500  |
| C | 2.13010000 | -4.64664100 | 3.73710800  |
| C | 2.95153300 | -4.57530000 | 2.61681100  |
| C | 2.46745000 | -4.06147600 | 1.40409300  |
| C | 0.31648700 | -3.60584200 | 2.46804400  |
| C | 0.81781600 | -4.18237800 | 3.64675600  |
| C | 3.44062000 | -1.90127700 | -0.99416800 |
| C | 3.68564800 | -3.26745600 | -0.87183900 |
| C | 4.28845500 | -3.94711200 | -1.94237600 |
| C | 4.75961800 | -3.25018600 | -3.05014400 |
| C | 4.63479300 | -1.86001200 | -3.08185000 |
| C | 3.96421500 | -1.15628100 | -2.06896800 |
| H | 0.16258700 | -4.24020600 | 4.51119400  |
| H | 5.04185400 | -1.29877500 | -3.91789500 |
| C | 3.51410300 | -4.22477100 | 0.30643700  |
| C | 4.81851900 | -4.25391900 | 1.17780400  |
| H | 5.11452800 | -3.22215200 | 1.39986100  |
| H | 5.65433400 | -4.73667400 | 0.66228100  |
| H | 5.32342700 | -5.79046200 | -1.44429400 |
| H | 3.96807900 | -6.01913200 | -2.54333000 |
| C | 1.17559300 | -3.54245300 | 1.35428000  |
| H | 2.50263300 | -5.05113300 | 4.67489400  |
| H | 5.23336200 | -3.77413200 | -3.87660100 |
| C | 4.40677300 | -4.96528500 | 2.48367900  |
| H | 5.00792100 | -4.65220400 | 3.34487100  |
| H | 4.52041500 | -6.05539300 | 2.39863000  |
| C | 4.30899400 | -5.43839200 | -1.67850200 |
| C | 3.36769600 | -5.58005700 | -0.46027100 |
| H | 2.33102500 | -5.68145000 | -0.80120800 |
| H | 3.60002600 | -6.44464300 | 0.16985300  |
| C | 3.87142700 | 0.33665500  | -2.12032200 |
| C | 3.13344400 | 0.97831000  | -3.14485300 |
| C | 4.58388900 | 1.10831000  | -1.16677700 |
| C | 2.38132800 | 0.25885100  | -4.12848500 |

|   |              |              |              |
|---|--------------|--------------|--------------|
| C | 3. 10587800  | 2. 42321100  | -3. 20595700 |
| C | 4. 52924200  | 2. 55111200  | -1. 22954300 |
| C | 1. 68720800  | 0. 91113500  | -5. 11284600 |
| H | 2. 33586500  | -0. 82122600 | -4. 06482600 |
| C | 2. 36887400  | 3. 06510800  | -4. 25075400 |
| C | 3. 79270100  | 3. 16838700  | -2. 24426200 |
| C | 1. 68575900  | 2. 33299900  | -5. 18442500 |
| H | 1. 10895600  | 0. 33836400  | -5. 83170700 |
| H | 2. 37183700  | 4. 15236700  | -4. 28746300 |
| H | 3. 74597700  | 4. 25455500  | -2. 28147900 |
| H | 1. 13385800  | 2. 83160900  | -5. 97726800 |
| C | -1. 08884600 | -3. 09272800 | 2. 43879000  |
| C | -1. 43969800 | -1. 96059600 | 3. 21355900  |
| C | -2. 07469600 | -3. 77330300 | 1. 68428500  |
| C | -0. 48015500 | -1. 20555300 | 3. 96382600  |
| C | -2. 81410600 | -1. 51475300 | 3. 24515500  |
| C | -3. 44099900 | -3. 30365400 | 1. 70555300  |
| C | -0. 84976300 | -0. 11514700 | 4. 70818500  |
| H | 0. 56163800  | -1. 49909300 | 3. 92054600  |
| C | -3. 16058500 | -0. 37850400 | 4. 04386300  |
| C | -3. 77454100 | -2. 19630500 | 2. 49144800  |
| C | -2. 21146600 | 0. 30231500  | 4. 75758500  |
| H | -0. 09555900 | 0. 44402400  | 5. 25594300  |
| H | -4. 20300800 | -0. 06770100 | 4. 07096400  |
| H | -4. 81017500 | -1. 86239100 | 2. 52155900  |
| H | -2. 48918000 | 1. 16374200  | 5. 35930700  |
| C | 6. 05456200  | 1. 29888200  | 0. 77901100  |
| H | 6. 65234800  | 0. 82564100  | 1. 55329100  |
| C | 5. 38747000  | 0. 52522400  | -0. 13417100 |
| H | 5. 47050200  | -0. 55415400 | -0. 08160100 |
| C | 5. 97560500  | 2. 71906100  | 0. 72575900  |
| H | 6. 50787200  | 3. 31577300  | 1. 46170000  |
| C | 5. 23854400  | 3. 32348900  | -0. 25632100 |
| H | 5. 16752900  | 4. 40671800  | -0. 31067900 |
| C | -2. 76157600 | -5. 57258400 | 0. 18117200  |
| H | -2. 51261400 | -6. 45217300 | -0. 40640200 |
| C | -4. 10172700 | -5. 09213000 | 0. 18945300  |
| H | -4. 86060000 | -5. 60404200 | -0. 39618100 |
| C | -4. 42878900 | -3. 99148100 | 0. 93371800  |
| H | -5. 44767400 | -3. 61203000 | 0. 94548100  |
| C | -1. 78569200 | -4. 93756300 | 0. 90310500  |
| H | -0. 77122400 | -5. 31917500 | 0. 88850100  |
| N | 0. 63299600  | -1. 12506700 | -1. 64450000 |
| S | -0. 82790200 | -1. 15183500 | -2. 22710300 |

|   |             |             |             |
|---|-------------|-------------|-------------|
| O | -0.99329500 | -0.20137100 | -3.34044800 |
| O | -1.91476300 | -1.14192300 | -1.20412900 |
| C | -0.99069200 | -2.82518900 | -3.04451500 |
| F | -0.04557100 | -2.96182000 | -3.98267700 |
| F | -2.19295100 | -2.91857900 | -3.62681400 |
| F | -0.86272900 | -3.80821200 | -2.15186600 |
| C | -5.03934700 | 1.35053900  | -1.01724600 |
| C | -4.22360700 | 1.30824900  | -2.35312400 |
| H | -4.90158900 | 1.59533600  | -3.16786900 |
| H | -3.91033800 | 0.27626600  | -2.53059300 |
| C | -3.00633600 | 2.17533300  | -2.47168000 |
| C | -4.05887000 | 1.15242700  | 0.19569400  |
| H | -4.34490800 | 1.81792000  | 1.01186600  |
| H | -4.13106500 | 0.12269400  | 0.55071000  |
| N | -2.62139900 | 1.33989200  | -0.07515100 |
| C | -1.83967100 | 2.31215400  | 0.45427900  |
| N | -0.57677800 | 1.98086500  | 0.75288300  |
| C | 0.47298600  | 2.83616500  | 1.18938100  |
| C | 0.83209600  | 4.00184900  | 0.51130000  |
| C | 1.20553900  | 2.41744100  | 2.30489700  |
| C | 1.89936000  | 4.76721800  | 0.98198000  |
| C | 2.27168200  | 3.19030400  | 2.75952800  |
| H | 0.93722400  | 1.49210900  | 2.80137600  |
| C | 2.61945800  | 4.37425900  | 2.10934200  |
| H | 3.44819200  | 4.97283400  | 2.46717600  |
| C | 3.09364800  | 2.71679600  | 3.93028600  |
| C | 2.25150400  | 6.04983600  | 0.27645600  |
| F | 2.37201000  | 1.93892500  | 4.76942600  |
| F | 4.15962000  | 1.98997800  | 3.53384900  |
| F | 3.57155500  | 3.75607000  | 4.65187000  |
| F | 1.52932400  | 7.09425000  | 0.73901000  |
| F | 3.55585100  | 6.37268800  | 0.43648000  |
| F | 2.01680900  | 5.97126900  | -1.05487300 |
| S | -2.46874900 | 3.92233600  | 0.56906600  |
| H | 0.29963400  | 4.30335600  | -0.38061900 |
| H | -0.31808400 | 0.96760800  | 0.79993300  |
| H | -2.15777300 | 0.45346600  | -0.33086800 |
| C | -2.95332900 | 3.56523200  | -2.43436700 |
| H | -3.90492500 | 4.09457800  | -2.52714400 |
| H | -2.82121100 | 3.72444800  | -1.10132100 |
| C | -5.79384200 | 2.72761600  | -0.89576300 |
| H | -6.34605800 | 2.87415600  | -1.83503000 |
| H | -5.05468400 | 3.52798500  | -0.82391300 |
| C | -6.09400300 | 0.22289000  | -1.02327000 |

|   |             |             |             |
|---|-------------|-------------|-------------|
| C | -6.60810200 | -0.31970600 | -2.21042900 |
| C | -6.62508900 | -0.25956300 | 0.18672600  |
| C | -7.59424600 | -1.30848700 | -2.19272000 |
| H | -6.23934100 | 0.01267800  | -3.17445100 |
| C | -7.61305700 | -1.24429300 | 0.20915300  |
| H | -6.27989200 | 0.14804800  | 1.13145200  |
| C | -8.10182100 | -1.77863200 | -0.98340600 |
| H | -7.96047500 | -1.71183200 | -3.13297700 |
| H | -8.00287800 | -1.58918100 | 1.16346300  |
| H | -8.86851800 | -2.54824100 | -0.96917000 |
| C | -6.75224700 | 2.87149200  | 0.25749900  |
| C | -6.56561800 | 3.68967700  | 1.29967900  |
| H | -5.65264100 | 4.28578200  | 1.34460900  |
| H | -7.66553700 | 2.27970400  | 0.21075300  |
| H | -2.08027000 | 1.63962100  | -2.68188100 |
| C | -7.53041700 | 3.87180600  | 2.43614200  |
| H | -7.86810400 | 4.91474600  | 2.50476500  |
| H | -8.41485300 | 3.23599100  | 2.32190700  |
| H | -7.05984400 | 3.63356400  | 3.39952500  |
| C | -1.74796500 | 4.30750900  | -3.00064800 |
| H | -1.57900000 | 5.25265100  | -2.47389800 |
| H | -0.83715800 | 3.70339000  | -2.93304200 |
| H | -1.91079700 | 4.54249100  | -4.05881300 |

TS-EF-4RS-4

l imaginary frequency

H = -5315.348918

G = -5315.550223

E(M06-2X-DCM) = -5316.228372

E(M06-2X-cyclohexane) = -5316.199680

|   |            |             |             |
|---|------------|-------------|-------------|
| O | 0.79970000 | -2.94810600 | 0.13406800  |
| O | 2.71042600 | -1.21834100 | -0.04027200 |
| P | 1.08661600 | -1.35297500 | -0.10822800 |
| O | 0.52341900 | -0.49584400 | 0.98354000  |
| C | 2.19008000 | -4.66725000 | 3.68944400  |
| C | 3.01556500 | -4.57467800 | 2.57369000  |
| C | 2.53203100 | -4.05022800 | 1.36529100  |
| C | 0.37270400 | -3.62629400 | 2.42580000  |
| C | 0.87422700 | -4.21325600 | 3.59932200  |
| C | 3.49586400 | -1.85326200 | -1.00406200 |
| C | 3.75310500 | -3.21840100 | -0.89604300 |
| C | 4.36652000 | -3.88027900 | -1.97169300 |
| C | 4.83553600 | -3.16652700 | -3.06960800 |
| C | 4.69681400 | -1.77744000 | -3.08679800 |



|   |              |              |              |
|---|--------------|--------------|--------------|
| C | 4. 01517800  | -1. 09142500 | -2. 06911800 |
| H | 0. 21607900  | -4. 28732400 | 4. 46029000  |
| H | 5. 10102900  | -1. 20320800 | -3. 91535500 |
| C | 3. 58498500  | -4. 19086800 | 0. 27034500  |
| C | 4. 88577100  | -4. 21868000 | 1. 14711700  |
| H | 5. 17128600  | -3. 18703400 | 1. 38303800  |
| H | 5. 72825100  | -4. 68739800 | 0. 62950300  |
| H | 5. 41620500  | -5. 71962000 | -1. 48975400 |
| H | 4. 06816500  | -5. 94811700 | -2. 59778500 |
| C | 1. 23576900  | -3. 54206200 | 1. 31646600  |
| H | 2. 56224800  | -5. 08012800 | 4. 62371100  |
| H | 5. 31772800  | -3. 67667000 | -3. 89980500 |
| C | 4. 47486800  | -4. 94975400 | 2. 44230500  |
| H | 5. 06931300  | -4. 64179800 | 3. 30997200  |
| H | 4. 59889000  | -6. 03765100 | 2. 34446000  |
| C | 4. 39967500  | -5. 37421400 | -1. 72478100 |
| C | 3. 45408600  | -5. 53836300 | -0. 51275000 |
| H | 2. 41993500  | -5. 64482900 | -0. 85974500 |
| H | 3. 69110900  | -6. 40817100 | 0. 10836100  |
| C | 3. 90422000  | 0. 40067800  | -2. 10671000 |
| C | 3. 16358000  | 1. 04239700  | -3. 12938500 |
| C | 4. 60092200  | 1. 17249600  | -1. 14174600 |
| C | 2. 42691000  | 0. 32275100  | -4. 12452300 |
| C | 3. 11679400  | 2. 48733200  | -3. 17652400 |
| C | 4. 52664200  | 2. 61499500  | -1. 19042400 |
| C | 1. 73019900  | 0. 97535400  | -5. 10682000 |
| H | 2. 39518000  | -0. 75839400 | -4. 07165400 |
| C | 2. 37764800  | 3. 12956200  | -4. 21959300 |
| C | 3. 78737700  | 3. 23220600  | -2. 20318100 |
| C | 1. 71019600  | 2. 39767900  | -5. 16464600 |
| H | 1. 16402100  | 0. 40204900  | -5. 83482500 |
| H | 2. 36599700  | 4. 21706400  | -4. 24548100 |
| H | 3. 72556700  | 4. 31798600  | -2. 22969300 |
| H | 1. 15630800  | 2. 89662600  | -5. 95586600 |
| C | -1. 03652800 | -3. 12361600 | 2. 39865900  |
| C | -1. 39828900 | -2. 00546200 | 3. 18878200  |
| C | -2. 01516900 | -3. 80060400 | 1. 63161500  |
| C | -0. 44615700 | -1. 25210200 | 3. 95013400  |
| C | -2. 77662900 | -1. 57234100 | 3. 22515100  |
| C | -3. 38536600 | -3. 34239800 | 1. 65692300  |
| C | -0. 82604800 | -0. 17541400 | 4. 70919600  |
| H | 0. 59827500  | -1. 53548400 | 3. 90330400  |
| C | -3. 13404200 | -0. 45121800 | 4. 04029800  |
| C | -3. 73004500 | -2. 25055900 | 2. 45956700  |

|   |             |             |             |
|---|-------------|-------------|-------------|
| C | -2.19164000 | 0.22842200  | 4.76410500  |
| H | -0.07733200 | 0.38301500  | 5.26525500  |
| H | -4.17968300 | -0.15170200 | 4.07256400  |
| H | -4.76850800 | -1.92585500 | 2.49182100  |
| H | -2.47771200 | 1.07817900  | 5.37837900  |
| C | 6.05850500  | 1.36381800  | 0.81377600  |
| H | 6.65880400  | 0.89116000  | 1.58646700  |
| C | 5.40705400  | 0.59022700  | -0.11068400 |
| H | 5.50488600  | -0.48838200 | -0.06856200 |
| C | 5.95993200  | 2.78323800  | 0.77444300  |
| H | 6.47966400  | 3.37972300  | 1.51944600  |
| C | 5.21979600  | 3.38727000  | -0.20554800 |
| H | 5.13399200  | 4.46993500  | -0.24948600 |
| C | -2.68430300 | -5.58123500 | 0.09870700  |
| H | -2.42698300 | -6.44941200 | -0.50208800 |
| C | -4.02828400 | -5.11154600 | 0.11106300  |
| H | -4.78157700 | -5.62018600 | -0.48453000 |
| C | -4.36605000 | -4.02546600 | 0.87177800  |
| H | -5.38797100 | -3.65423400 | 0.88738000  |
| C | -1.71512600 | -4.95018800 | 0.83306500  |
| H | -0.69764800 | -5.32354600 | 0.81490600  |
| N | 0.68307300  | -1.09113900 | -1.65332600 |
| S | -0.77483400 | -1.12867500 | -2.24310500 |
| O | -0.94797200 | -0.16332100 | -3.34222900 |
| O | -1.86608700 | -1.14907800 | -1.22494300 |
| C | -0.91108500 | -2.79142900 | -3.08636700 |
| F | 0.03952700  | -2.90082600 | -4.02258000 |
| F | -2.10960400 | -2.89269900 | -3.67482400 |
| F | -0.77288900 | -3.78592500 | -2.20798400 |
| C | -5.03304200 | 1.32944900  | -0.92605200 |
| C | -4.25810600 | 1.30336000  | -2.28805200 |
| H | -4.95608000 | 1.62121700  | -3.07390100 |
| H | -3.96975700 | 0.26988300  | -2.49724900 |
| C | -3.02526600 | 2.14791600  | -2.41930500 |
| C | -4.01682200 | 1.07243600  | 0.24629300  |
| H | -4.28229000 | 1.67043400  | 1.11793400  |
| H | -4.06900900 | 0.01958600  | 0.53000400  |
| N | -2.58801500 | 1.29729800  | -0.03956500 |
| C | -1.82478400 | 2.28015600  | 0.49725600  |
| N | -0.55441900 | 1.97237200  | 0.78672900  |
| C | 0.47831300  | 2.84393300  | 1.23092400  |
| C | 0.81677400  | 4.02011700  | 0.56055800  |
| C | 1.21675800  | 2.43114900  | 2.34458300  |
| C | 1.87079900  | 4.80047900  | 1.03628100  |

|   |             |             |             |
|---|-------------|-------------|-------------|
| C | 2.26847800  | 3.21995100  | 2.80546000  |
| H | 0.96372500  | 1.49840000  | 2.83535000  |
| C | 2.59646300  | 4.41324100  | 2.16218100  |
| H | 3.41460400  | 5.02380700  | 2.52416300  |
| C | 3.09639900  | 2.75377100  | 3.97500100  |
| C | 2.20410000  | 6.09168600  | 0.33714200  |
| F | 2.38499100  | 1.96258700  | 4.81033200  |
| F | 4.17271500  | 2.04335900  | 3.57654400  |
| F | 3.55911500  | 3.79682900  | 4.70079500  |
| F | 1.47036900  | 7.12414500  | 0.80783700  |
| F | 3.50487400  | 6.42976700  | 0.49521600  |
| F | 1.96658000  | 6.01735100  | -0.99386300 |
| S | -2.49374100 | 3.87234200  | 0.63297000  |
| H | 0.27953100  | 4.31728500  | -0.33004600 |
| H | -0.27668400 | 0.96315900  | 0.82139300  |
| H | -2.10821100 | 0.42469300  | -0.31143200 |
| C | -2.94596900 | 3.53638200  | -2.38162000 |
| H | -3.88607700 | 4.08520300  | -2.47910700 |
| H | -2.82783200 | 3.68951900  | -1.04172100 |
| C | -5.77504500 | 2.71009300  | -0.77431200 |
| H | -6.45497100 | 2.80502000  | -1.62984000 |
| H | -5.03530800 | 3.51043900  | -0.85881700 |
| C | -6.10359400 | 0.21872900  | -0.91625000 |
| C | -6.62760400 | -0.33555600 | -2.09330600 |
| C | -6.63539200 | -0.23788500 | 0.30264600  |
| C | -7.62438700 | -1.31325600 | -2.05694600 |
| H | -6.25873200 | -0.02187800 | -3.06360200 |
| C | -7.63055100 | -1.21440800 | 0.34423500  |
| H | -6.28095700 | 0.17886700  | 1.23947500  |
| C | -8.13021900 | -1.76087400 | -0.83836300 |
| H | -7.99891500 | -1.72676600 | -2.98952700 |
| H | -8.01900200 | -1.54196900 | 1.30517000  |
| H | -8.90418600 | -2.52285500 | -0.80932300 |
| C | -6.54728500 | 2.94556300  | 0.49638100  |
| C | -7.87814700 | 3.03958600  | 0.57233500  |
| H | -8.46602500 | 2.90294100  | -0.33722300 |
| H | -5.96127500 | 3.09764800  | 1.40424000  |
| H | -2.11018000 | 1.59691400  | -2.63696800 |
| C | -8.65711000 | 3.32140900  | 1.82416500  |
| H | -9.35759000 | 2.50472200  | 2.04531900  |
| H | -7.99878100 | 3.44946300  | 2.69010800  |
| H | -9.26188800 | 4.23228400  | 1.71987000  |
| C | -1.72321900 | 4.25582400  | -2.93888600 |
| H | -1.53823600 | 5.19583200  | -2.40823200 |

|   |             |            |             |
|---|-------------|------------|-------------|
| H | -0.82509000 | 3.63332800 | -2.86947900 |
| H | -1.87579200 | 4.49799900 | -3.99697200 |

TS-EF-4RS-5

l imaginary frequency

H = -5315.341139

G = -5315.544139

E(M06-2X-DCM) = -5316.227407

E(M06-2X-cyclohexane) = -5316.197104

|   |             |             |             |
|---|-------------|-------------|-------------|
| O | 2.83810400  | -1.64964900 | -0.07350100 |
| O | 2.24357900  | 0.53813100  | -1.32307400 |
| P | 1.61931900  | -0.58263400 | -0.29942600 |
| O | 1.22350800  | 0.17576100  | 0.93520800  |
| C | 6.35104900  | -0.27105900 | 1.73137100  |
| C | 6.14213800  | -0.10165800 | 0.36615700  |
| C | 5.00073200  | -0.63354100 | -0.25343400 |
| C | 4.21316900  | -1.45012400 | 1.91191000  |
| C | 5.40543300  | -0.97113300 | 2.48149700  |
| C | 2.68828300  | 0.17649700  | -2.59359900 |
| C | 3.95323000  | -0.39241200 | -2.74021300 |
| C | 4.32966800  | -0.90104100 | -3.99386500 |
| C | 3.51202900  | -0.73016700 | -5.10547900 |
| C | 2.30608200  | -0.04473800 | -4.96047800 |
| C | 1.85761600  | 0.40853500  | -3.70888800 |
| H | 5.57422200  | -1.13871300 | 3.54120000  |
| H | 1.67489500  | 0.12787700  | -5.82720600 |
| C | 5.12766200  | -0.51059000 | -1.76912700 |
| C | 6.06546000  | 0.74137500  | -1.86334500 |
| H | 5.45392000  | 1.64705800  | -1.77066300 |
| H | 6.59520700  | 0.79654200  | -2.81929000 |
| H | 6.46553500  | -1.02341200 | -4.36052400 |
| H | 5.65141700  | -2.58302900 | -4.41625000 |
| C | 4.02026200  | -1.23457700 | 0.53316400  |
| H | 7.24214200  | 0.12606900  | 2.21121500  |
| H | 3.80733600  | -1.11597700 | -6.07796100 |
| C | 7.00750600  | 0.61855300  | -0.64555900 |
| H | 7.35980600  | 1.59095700  | -0.28224300 |
| H | 7.90429600  | 0.03295900  | -0.89185400 |
| C | 5.66072000  | -1.61519800 | -3.90209400 |
| C | 5.86075800  | -1.75356400 | -2.37749500 |
| H | 5.36450900  | -2.66287900 | -2.01977100 |
| H | 6.91239100  | -1.80673200 | -2.07889500 |
| C | 0.55572300  | 1.14360500  | -3.62271900 |
| C | -0.65557700 | 0.48524500  | -3.95073900 |

|   |             |             |             |
|---|-------------|-------------|-------------|
| C | 0.54662700  | 2.52489700  | -3.30105400 |
| C | -0.71933800 | -0.91264000 | -4.25378400 |
| C | -1.89613100 | 1.22895300  | -3.96273600 |
| C | -0.70457300 | 3.25067500  | -3.29633800 |
| C | -1.90460200 | -1.52151000 | -4.57097300 |
| H | 0.18566200  | -1.50178900 | -4.18894400 |
| C | -3.11203300 | 0.55624900  | -4.30569900 |
| C | -1.88789000 | 2.58585500  | -3.63041100 |
| C | -3.11915300 | -0.77933600 | -4.60951800 |
| H | -1.92389900 | -2.58907000 | -4.76777600 |
| H | -4.03618100 | 1.12976100  | -4.31255300 |
| H | -2.82428700 | 3.14062800  | -3.63865200 |
| H | -4.05131100 | -1.28077500 | -4.85112300 |
| C | 3.21552000  | -2.17936800 | 2.75404500  |
| C | 2.58532600  | -1.51939200 | 3.83842800  |
| C | 2.94087500  | -3.54639100 | 2.49922800  |
| C | 2.81431100  | -0.14065600 | 4.15493700  |
| C | 1.66064800  | -2.24798700 | 4.67807900  |
| C | 1.99182900  | -4.25162800 | 3.32920900  |
| C | 2.21962200  | 0.45496200  | 5.23832700  |
| H | 3.47156300  | 0.43989600  | 3.51836100  |
| C | 1.05075200  | -1.58581100 | 5.78969100  |
| C | 1.38113500  | -3.58653000 | 4.39416900  |
| C | 1.32664900  | -0.27526600 | 6.07420400  |
| H | 2.43063100  | 1.49781000  | 5.46175700  |
| H | 0.36554600  | -2.15660500 | 6.41248800  |
| H | 0.67469200  | -4.12635300 | 5.02153700  |
| H | 0.86999100  | 0.21036100  | 6.93293000  |
| C | 1.69404700  | 4.59694700  | -2.68459200 |
| H | 2.61363800  | 5.12538100  | -2.44959300 |
| C | 1.73638500  | 3.26285900  | -2.99722800 |
| H | 2.69054400  | 2.74953100  | -3.02194800 |
| C | 0.45615600  | 5.29991600  | -2.66243600 |
| H | 0.44144800  | 6.35783800  | -2.41447600 |
| C | -0.70575500 | 4.64247800  | -2.96513100 |
| H | -1.65751400 | 5.16899800  | -2.96579600 |
| C | 3.28937700  | -5.60814400 | 1.23378700  |
| H | 3.79229000  | -6.14415000 | 0.43331000  |
| C | 2.33206200  | -6.28873400 | 2.03785600  |
| H | 2.10580200  | -7.33277200 | 1.83930100  |
| C | 1.70779500  | -5.62625900 | 3.05860900  |
| H | 0.98000600  | -6.13337400 | 3.68746700  |
| C | 3.58458300  | -4.28949000 | 1.45878000  |
| H | 4.32510600  | -3.79522600 | 0.84095500  |

|   |             |             |             |
|---|-------------|-------------|-------------|
| N | 0.49796800  | -1.37164600 | -1.14130900 |
| S | -0.40290000 | -2.54307300 | -0.55605500 |
| O | -1.82163800 | -2.27251500 | -0.89169900 |
| O | -0.10588300 | -2.97313500 | 0.81791200  |
| C | 0.05969500  | -4.00334200 | -1.62499900 |
| F | -0.15888400 | -3.75107800 | -2.92378900 |
| F | -0.67604500 | -5.06107000 | -1.26756900 |
| F | 1.35325700  | -4.29387000 | -1.45788800 |
| C | 0.08964400  | 3.67758400  | 1.95074600  |
| C | 0.28810700  | 2.62080800  | 3.10546700  |
| H | 0.56386800  | 3.18803300  | 4.00489000  |
| H | 1.13616000  | 1.98855000  | 2.84231800  |
| C | -0.85338500 | 1.71444900  | 3.44052600  |
| C | -0.54154400 | 2.98517200  | 0.68686700  |
| H | -1.31306400 | 3.63542200  | 0.27538500  |
| H | 0.21585500  | 2.84551900  | -0.08436400 |
| N | -1.13411000 | 1.64506900  | 0.89318200  |
| C | -2.44685300 | 1.34963700  | 0.76196600  |
| N | -2.78840500 | 0.13662600  | 0.29003400  |
| C | -4.11060800 | -0.40240300 | 0.22216200  |
| C | -4.88995600 | -0.58289600 | 1.36685000  |
| C | -4.58610100 | -0.80845000 | -1.02294000 |
| C | -6.16095400 | -1.13949100 | 1.25171000  |
| C | -5.86102600 | -1.37151100 | -1.12355800 |
| H | -3.96299400 | -0.69212200 | -1.90312500 |
| C | -6.65659900 | -1.53549900 | 0.00656200  |
| H | -7.64329600 | -1.97465500 | -0.07602100 |
| C | -6.35483700 | -1.78698900 | -2.48558800 |
| C | -7.03275700 | -1.27242200 | 2.47258000  |
| F | -5.57556700 | -2.74650500 | -3.02869900 |
| F | -7.61720800 | -2.26055300 | -2.44864300 |
| F | -6.34075200 | -0.74260600 | -3.35071300 |
| F | -7.87054800 | -0.21767300 | 2.60072600  |
| F | -7.80232100 | -2.38011000 | 2.41860500  |
| F | -6.30273900 | -1.33528400 | 3.60863300  |
| S | -3.62502400 | 2.47274300  | 1.35300400  |
| H | -4.50692000 | -0.30049400 | 2.33835900  |
| H | -2.09671900 | -0.45311400 | -0.19200100 |
| H | -0.43178200 | 0.89067000  | 0.77754400  |
| C | -2.08798500 | 2.08035500  | 3.97495800  |
| H | -2.14558300 | 3.08548800  | 4.40096800  |
| H | -2.73415600 | 2.34454500  | 2.84054900  |
| C | -0.86138200 | 4.82311300  | 2.41967700  |
| H | -0.44636200 | 5.26157600  | 3.33828300  |

|   |             |            |             |
|---|-------------|------------|-------------|
| H | -1.82431600 | 4.39072000 | 2.69780600  |
| C | 1.51553900  | 4.20364400 | 1.64999600  |
| C | 1.97275800  | 5.45021200 | 2.10458700  |
| C | 2.44074000  | 3.37517800 | 0.99089400  |
| C | 3.28828900  | 5.86680800 | 1.88451000  |
| H | 1.31149700  | 6.12229000 | 2.63937900  |
| C | 3.75495800  | 3.78707400 | 0.77514900  |
| H | 2.15102200  | 2.38224000 | 0.66301900  |
| C | 4.18662600  | 5.03937000 | 1.21431200  |
| H | 3.60553100  | 6.84210100 | 2.24466900  |
| H | 4.44234200  | 3.11416900 | 0.26942200  |
| H | 5.21055600  | 5.36175500 | 1.04463300  |
| C | -1.12280200 | 5.90532200 | 1.39996500  |
| C | -2.34172600 | 6.31328000 | 1.03170300  |
| H | -3.21586600 | 5.83089700 | 1.47198200  |
| H | -0.25435400 | 6.38123200 | 0.94665300  |
| H | -0.66953100 | 0.65227700 | 3.28393800  |
| C | -2.62266700 | 7.40605600 | 0.04092000  |
| H | -3.22388600 | 7.03368400 | -0.79947100 |
| H | -3.19987200 | 8.22010600 | 0.50010800  |
| H | -1.69832000 | 7.83243400 | -0.36329800 |
| C | -2.97151100 | 1.04317000 | 4.65904800  |
| H | -4.02919600 | 1.31893900 | 4.60014300  |
| H | -2.84731700 | 0.05523100 | 4.20307100  |
| H | -2.70693000 | 0.95482500 | 5.71874300  |

TS-EF-4RS-6

l imaginary frequency

H = -5315.338884

G = -5315.544729

E(M06-2X-DCM) = -5316.223307

E(M06-2X-cyclohexane) = -5316.192541

|   |            |             |             |
|---|------------|-------------|-------------|
| O | 2.72208300 | -1.74873600 | -0.15347600 |
| O | 2.37311200 | 0.57167300  | -1.26416800 |
| P | 1.61875900 | -0.55489700 | -0.34145500 |
| O | 1.22703600 | 0.13260600  | 0.93274900  |
| C | 6.28228300 | -0.86900100 | 1.85845600  |
| C | 6.13473800 | -0.56296400 | 0.50934000  |
| C | 4.97289500 | -0.93557600 | -0.18270000 |
| C | 4.04235300 | -1.85932700 | 1.87879700  |
| C | 5.25479500 | -1.54510900 | 2.51733200  |
| C | 2.83651800 | 0.24886200  | -2.53835500 |
| C | 4.04743600 | -0.42967700 | -2.67888600 |
| C | 4.42454200 | -0.89343900 | -3.95007500 |

|   |             |             |             |
|---|-------------|-------------|-------------|
| C | 3.66850400  | -0.58492800 | -5.07533000 |
| C | 2.52952400  | 0.20630600  | -4.92834500 |
| C | 2.08316100  | 0.63178600  | -3.66706600 |
| H | 5.37564500  | -1.82453900 | 3.55986300  |
| H | 1.95251300  | 0.49296300  | -5.80276800 |
| C | 5.16782600  | -0.71409500 | -1.67900600 |
| C | 6.20909500  | 0.45590500  | -1.64673400 |
| H | 5.67162000  | 1.39989300  | -1.49984600 |
| H | 6.77720200  | 0.53608400  | -2.57877400 |
| H | 6.55353100  | -1.17440700 | -4.25608000 |
| H | 5.61610900  | -2.65308100 | -4.44027400 |
| C | 3.91397800  | -1.50326800 | 0.52137800  |
| H | 7.18858600  | -0.59864600 | 2.39474100  |
| H | 3.96352400  | -0.94154300 | -6.05896700 |
| C | 7.09170200  | 0.16103100  | -0.41321300 |
| H | 7.50227100  | 1.07115200  | 0.03917200  |
| H | 7.94961900  | -0.47340800 | -0.67666300 |
| C | 5.68634500  | -1.72389700 | -3.86329800 |
| C | 5.81759600  | -1.97351400 | -2.34617600 |
| H | 5.23479600  | -2.85820000 | -2.06523600 |
| H | 6.84916600  | -2.13461300 | -2.01802200 |
| C | 0.88035000  | 1.52127400  | -3.58592900 |
| C | -0.40289800 | 1.02849900  | -3.92422100 |
| C | 1.05408500  | 2.89497100  | -3.28071000 |
| C | -0.63941800 | -0.34392300 | -4.25469100 |
| C | -1.53657200 | 1.92690500  | -3.93469100 |
| C | -0.09061000 | 3.77886100  | -3.27925900 |
| C | -1.88938400 | -0.79121500 | -4.59108200 |
| H | 0.18525400  | -1.04158400 | -4.20052300 |
| C | -2.82542300 | 1.41992700  | -4.29472500 |
| C | -1.35291700 | 3.27077900  | -3.59963900 |
| C | -2.99946300 | 0.10122300  | -4.62278600 |
| H | -2.04189400 | -1.84371000 | -4.80901900 |
| H | -3.66636100 | 2.10978800  | -4.30532900 |
| H | -2.20901100 | 3.94288600  | -3.60972500 |
| H | -3.98448400 | -0.27263700 | -4.88655700 |
| C | 2.96255300  | -2.57366500 | 2.62695700  |
| C | 2.37678900  | -1.97679500 | 3.77188600  |
| C | 2.56773200  | -3.87531900 | 2.22686800  |
| C | 2.73270700  | -0.67070000 | 4.24242500  |
| C | 1.37094200  | -2.69886400 | 4.51935200  |
| C | 1.53881000  | -4.56995800 | 2.96576000  |
| C | 2.18168900  | -0.14396400 | 5.38301600  |
| H | 3.45415400  | -0.09102500 | 3.67885700  |



|   |             |             |             |
|---|-------------|-------------|-------------|
| C | 0.80831000  | -2.10614200 | 5.69349200  |
| C | 0.97057100  | -3.96573600 | 4.08883000  |
| C | 1.20662500  | -0.86938200 | 6.12572000  |
| H | 2.49001700  | 0.84150800  | 5.72374500  |
| H | 0.06075600  | -2.67237200 | 6.24470700  |
| H | 0.20434700  | -4.49932900 | 4.64771100  |
| H | 0.78520000  | -0.43949400 | 7.03088300  |
| C | 2.47859300  | 4.81491100  | -2.76256600 |
| H | 3.46850200  | 5.22760100  | -2.58644800 |
| C | 2.33657900  | 3.47519000  | -3.01588600 |
| H | 3.21275500  | 2.83742600  | -3.03665600 |
| C | 1.34399100  | 5.67582200  | -2.73686900 |
| H | 1.47405000  | 6.73562100  | -2.53382500 |
| C | 0.09720000  | 5.16612000  | -2.98460400 |
| H | -0.77672200 | 5.81370500  | -2.98348700 |
| C | 2.75440900  | -5.82068400 | 0.75890600  |
| H | 3.22512500  | -6.31700400 | -0.08547700 |
| C | 1.71811300  | -6.48593100 | 1.47268100  |
| H | 1.40046700  | -7.47768100 | 1.16257300  |
| C | 1.13396800  | -5.87583600 | 2.54824900  |
| H | 0.34770900  | -6.37374000 | 3.11058200  |
| C | 3.16503800  | -4.56604800 | 1.12455800  |
| H | 3.96392400  | -4.08441700 | 0.57331100  |
| N | 0.46629100  | -1.18431100 | -1.27847500 |
| S | -0.49318900 | -2.37383400 | -0.85258400 |
| O | -1.88327000 | -2.03209100 | -1.24253400 |
| O | -0.29248900 | -2.93030500 | 0.49364900  |
| C | -0.02070400 | -3.75254600 | -2.02148800 |
| F | -0.19375100 | -3.38704400 | -3.30150900 |
| F | -0.78636700 | -4.82131000 | -1.77894400 |
| F | 1.26149200  | -4.08346100 | -1.84234600 |
| C | 0.08841200  | 3.34820100  | 2.45037300  |
| C | 0.28181900  | 2.09796700  | 3.37494500  |
| H | 0.54333200  | 2.45414600  | 4.37787600  |
| H | 1.12557900  | 1.52313800  | 2.98975800  |
| C | -0.87388700 | 1.15995200  | 3.53757200  |
| C | -0.48745800 | 2.87351800  | 1.07046300  |
| H | -1.18520200 | 3.61728800  | 0.68303700  |
| H | 0.33382600  | 2.76181000  | 0.36210200  |
| N | -1.14754300 | 1.54865400  | 1.04148900  |
| C | -2.46488900 | 1.32119700  | 0.85949300  |
| N | -2.84163800 | 0.21921700  | 0.18749100  |
| C | -4.17149200 | -0.28240200 | 0.04152600  |
| C | -4.96933200 | -0.59715000 | 1.14390100  |

|   |             |             |             |
|---|-------------|-------------|-------------|
| C | -4.63338100 | -0.52350400 | -1.25084700 |
| C | -6.24372400 | -1.12040300 | 0.94219400  |
| C | -5.90998100 | -1.05914800 | -1.43864900 |
| H | -3.99625400 | -0.30225400 | -2.10037500 |
| C | -6.72394200 | -1.35442700 | -0.34906600 |
| H | -7.71198000 | -1.77203300 | -0.49938700 |
| C | -6.38392100 | -1.30000400 | -2.84890200 |
| C | -7.13433300 | -1.39608200 | 2.12523100  |
| F | -5.57676000 | -2.16065600 | -3.50574200 |
| F | -7.63479100 | -1.80194500 | -2.88936300 |
| F | -6.38612100 | -0.15001100 | -3.56731700 |
| F | -7.96501800 | -0.35724200 | 2.37253700  |
| F | -7.91192600 | -2.48066100 | 1.92272600  |
| F | -6.42149600 | -1.60760300 | 3.25422100  |
| S | -3.60847500 | 2.36183400  | 1.64317300  |
| H | -4.59821500 | -0.44647700 | 2.14848600  |
| H | -2.15898200 | -0.31489400 | -0.36853200 |
| H | -0.46387600 | 0.80421900  | 0.81231000  |
| C | -2.09437900 | 1.44121000  | 4.14023900  |
| H | -2.14133300 | 2.35961000  | 4.73080300  |
| H | -2.75324400 | 1.94060700  | 3.05061600  |
| C | -0.86734500 | 4.39836500  | 3.12682600  |
| H | -0.46978100 | 4.58741400  | 4.13453900  |
| H | -1.86205600 | 3.96495100  | 3.24598400  |
| C | 1.45984600  | 4.03642600  | 2.26401700  |
| C | 1.80496400  | 4.68502200  | 1.06731400  |
| C | 2.37685800  | 4.11656200  | 3.32557900  |
| C | 3.01829000  | 5.36226000  | 0.93319700  |
| H | 1.12792800  | 4.68599600  | 0.21996200  |
| C | 3.59080100  | 4.79076100  | 3.19404100  |
| H | 2.15714000  | 3.64755700  | 4.27896600  |
| C | 3.92110600  | 5.41693800  | 1.99302500  |
| H | 3.25073500  | 5.84480600  | -0.01148600 |
| H | 4.27796600  | 4.82255300  | 4.03558000  |
| H | 4.86687200  | 5.94125300  | 1.88648900  |
| C | -1.00465500 | 5.71267200  | 2.40347800  |
| C | -2.13939200 | 6.16513500  | 1.85879200  |
| H | -3.03567300 | 5.54552300  | 1.91535300  |
| H | -0.10991100 | 6.33137000  | 2.34522200  |
| H | -0.70301300 | 0.14023200  | 3.19506700  |
| C | -2.29348200 | 7.48808400  | 1.16466800  |
| H | -2.63540300 | 7.35606300  | 0.12924700  |
| H | -3.04673700 | 8.11253200  | 1.66401400  |
| H | -1.35082400 | 8.04521600  | 1.14362500  |

|   |             |             |            |
|---|-------------|-------------|------------|
| C | -3.00270800 | 0.31707800  | 4.62074500 |
| H | -4.05548300 | 0.61774100  | 4.60966800 |
| H | -2.89224500 | -0.57559100 | 3.99593400 |
| H | -2.74768700 | 0.03419700  | 5.64843800 |

TS-EF-4RS-7

l imaginary frequency

H = -5315.337228

G = -5315.541868

E(M06-2X-DCM) = -5316.222456

E(M06-2X-cyclohexane) = -5316.191342

|   |            |             |             |
|---|------------|-------------|-------------|
| O | 2.72056300 | -1.79997400 | 0.05628900  |
| O | 2.32849800 | 0.32253300  | -1.38464900 |
| P | 1.60241400 | -0.65516200 | -0.28721100 |
| O | 1.23203200 | 0.21720800  | 0.87579200  |
| C | 6.28285200 | -0.58027900 | 1.87761900  |
| C | 6.11860000 | -0.47676800 | 0.49997300  |
| C | 4.95863700 | -0.96704200 | -0.11809400 |
| C | 4.06234000 | -1.59569500 | 2.06625800  |
| C | 5.27397500 | -1.17144600 | 2.63914500  |
| C | 2.78110200 | -0.18564300 | -2.60062200 |
| C | 4.00515300 | -0.85300100 | -2.65228400 |
| C | 4.38096300 | -1.49477000 | -3.84378800 |
| C | 3.60712300 | -1.37568100 | -4.99274300 |
| C | 2.44972100 | -0.59879900 | -4.95119000 |
| C | 2.00500300 | 0.00236800  | -3.76272800 |
| H | 5.40866400 | -1.29388000 | 3.70987300  |
| H | 1.85659200 | -0.46243800 | -5.85080000 |
| C | 5.13860000 | -0.96314200 | -1.63285000 |
| C | 6.15527300 | 0.21910500  | -1.78216200 |
| H | 5.59946500 | 1.16378200  | -1.76842700 |
| H | 6.71459000 | 0.17372700  | -2.72182800 |
| H | 6.51330100 | -1.77173100 | -4.12881300 |
| H | 5.60909400 | -3.28146100 | -4.08106500 |
| C | 3.91608000 | -1.44306700 | 0.67302800  |
| H | 7.18803000 | -0.21830100 | 2.35898400  |
| H | 3.90152700 | -1.86919000 | -5.91553400 |
| C | 7.05317000 | 0.12387600  | -0.52818700 |
| H | 7.44781700 | 1.09801000  | -0.21699000 |
| H | 7.92235500 | -0.52491100 | -0.70583100 |
| C | 5.66223000 | -2.27554900 | -3.64916800 |
| C | 5.81111100 | -2.29396900 | -2.11343100 |
| H | 5.25086100 | -3.13935200 | -1.69783300 |
| H | 6.84863200 | -2.38299200 | -1.77668800 |

|   |             |             |             |
|---|-------------|-------------|-------------|
| C | 0.77536700  | 0.85762700  | -3.79871200 |
| C | -0.49265900 | 0.28074600  | -4.05217900 |
| C | 0.90433400  | 2.26540000  | -3.69036800 |
| C | -0.68635600 | -1.13182100 | -4.17925100 |
| C | -1.65546200 | 1.13157700  | -4.18048800 |
| C | -0.26867600 | 3.10327900  | -3.80699100 |
| C | -1.92278100 | -1.66215900 | -4.43495200 |
| H | 0.16054400  | -1.78849100 | -4.03216600 |
| C | -2.92940200 | 0.53725800  | -4.44974900 |
| C | -1.51451100 | 2.51474200  | -4.04304200 |
| C | -3.06169000 | -0.81984600 | -4.58223100 |
| H | -2.04223400 | -2.73928700 | -4.49776700 |
| H | -3.79392200 | 1.19003400  | -4.54842200 |
| H | -2.39213100 | 3.15088700  | -4.14267500 |
| H | -4.03586700 | -1.25892500 | -4.77559600 |
| C | 3.00102800  | -2.21135700 | 2.92114500  |
| C | 2.41188700  | -1.46400000 | 3.97198600  |
| C | 2.62744000  | -3.56416100 | 2.71909900  |
| C | 2.74550000  | -0.09669800 | 4.24222800  |
| C | 1.42570500  | -2.08672400 | 4.82719600  |
| C | 1.61681500  | -4.16111400 | 3.56140500  |
| C | 2.19272000  | 0.58137100  | 5.29901100  |
| H | 3.45155700  | 0.40643400  | 3.59220400  |
| C | 0.86097500  | -1.33904000 | 5.90814600  |
| C | 1.04586100  | -3.40950700 | 4.59017600  |
| C | 1.23824500  | -0.04532500 | 6.15057300  |
| H | 2.48449300  | 1.61137500  | 5.48956000  |
| H | 0.12889300  | -1.83201300 | 6.54396100  |
| H | 0.29366600  | -3.86891400 | 5.22832700  |
| H | 0.81578900  | 0.50477700  | 6.98759000  |
| C | 2.26509600  | 4.28368900  | -3.44798700 |
| H | 3.24012500  | 4.74819500  | -3.32822800 |
| C | 2.16692100  | 2.91815000  | -3.51335000 |
| H | 3.06337700  | 2.31251800  | -3.44714400 |
| C | 1.10347200  | 5.10262900  | -3.54200500 |
| H | 1.19901300  | 6.18424700  | -3.49183300 |
| C | -0.12596100 | 4.52363000  | -3.71238300 |
| H | -1.02011200 | 5.13662700  | -3.80179000 |
| C | 2.83954900  | -5.69970200 | 1.54900900  |
| H | 3.31362300  | -6.30599400 | 0.78182000  |
| C | 1.82069600  | -6.27131300 | 2.36209700  |
| H | 1.51923200  | -7.30305200 | 2.20313400  |
| C | 1.23305100  | -5.52070600 | 3.34277400  |
| H | 0.46006600  | -5.94449900 | 3.97933700  |

|   |              |              |              |
|---|--------------|--------------|--------------|
| C | 3. 22959300  | -4. 39818300 | 1. 72367700  |
| H | 4. 01570500  | -3. 98856700 | 1. 10050700  |
| N | 0. 43936500  | -1. 42632000 | -1. 09579500 |
| S | -0. 54642500 | -2. 48939700 | -0. 45124300 |
| O | -1. 93392300 | -2. 18203200 | -0. 87901700 |
| O | -0. 33892700 | -2. 80014600 | 0. 97138500  |
| C | -0. 12916100 | -4. 06941300 | -1. 35651700 |
| F | -0. 29860500 | -3. 93403200 | -2. 68074800 |
| F | -0. 92789700 | -5. 05075900 | -0. 92465500 |
| F | 1. 14254100  | -4. 40477000 | -1. 12161900 |
| C | 0. 12722900  | 3. 68308400  | 1. 89632600  |
| C | 0. 36763100  | 2. 59665300  | 3. 00060300  |
| H | 0. 60842800  | 3. 11573800  | 3. 93570500  |
| H | 1. 23501700  | 2. 00261900  | 2. 70767800  |
| C | -0. 75168400 | 1. 64573600  | 3. 29763400  |
| C | -0. 42785300 | 2. 97896800  | 0. 60780300  |
| H | -1. 10184100 | 3. 64227500  | 0. 06666500  |
| H | 0. 41475300  | 2. 74161100  | -0. 04321400 |
| N | -1. 10764200 | 1. 67614600  | 0. 78247700  |
| C | -2. 43241300 | 1. 45145900  | 0. 67087500  |
| N | -2. 84891200 | 0. 27450800  | 0. 17380800  |
| C | -4. 19473500 | -0. 20301200 | 0. 11929800  |
| C | -4. 97788700 | -0. 34416000 | 1. 26698400  |
| C | -4. 69037300 | -0. 59598000 | -1. 12222300 |
| C | -6. 27118800 | -0. 84787700 | 1. 15741400  |
| C | -5. 98685200 | -1. 10823000 | -1. 21672400 |
| H | -4. 06569200 | -0. 50730000 | -2. 00481900 |
| C | -6. 78567200 | -1. 23224000 | -0. 08375600 |
| H | -7. 79002900 | -1. 63060800 | -0. 16131900 |
| C | -6. 49512300 | -1. 52614100 | -2. 57267400 |
| C | -7. 14592800 | -0. 93768300 | 2. 38044100  |
| F | -5. 80493300 | -2. 57924600 | -3. 06195900 |
| F | -7. 79810100 | -1. 87257800 | -2. 54487200 |
| F | -6. 36105300 | -0. 52416300 | -3. 47587800 |
| F | -7. 96159600 | 0. 13637800  | 2. 48549400  |
| F | -7. 93829400 | -2. 03006900 | 2. 34745600  |
| F | -6. 41806300 | -0. 99318500 | 3. 51811500  |
| S | -3. 52893700 | 2. 61939900  | 1. 33556600  |
| H | -4. 58129000 | -0. 07451200 | 2. 23621400  |
| H | -2. 18959600 | -0. 35899800 | -0. 30150700 |
| H | -0. 44031400 | 0. 89402800  | 0. 65358700  |
| C | -1. 96776300 | 1. 95612500  | 3. 89331200  |
| H | -2. 03007700 | 2. 92634900  | 4. 39263300  |
| H | -2. 65424100 | 2. 34612300  | 2. 76302800  |

|   |             |             |             |
|---|-------------|-------------|-------------|
| C | -0.83908600 | 4.79802100  | 2.44662200  |
| H | -0.34075200 | 5.24878700  | 3.31347800  |
| H | -1.75476300 | 4.32712900  | 2.81193700  |
| C | 1.46628100  | 4.37776400  | 1.57015200  |
| C | 1.69325900  | 4.95488000  | 0.31048600  |
| C | 2.46865300  | 4.53497200  | 2.54078600  |
| C | 2.87462400  | 5.64251500  | 0.03029400  |
| H | 0.94780200  | 4.88067500  | -0.47370200 |
| C | 3.65103100  | 5.22239100  | 2.26403300  |
| H | 2.34491200  | 4.11588900  | 3.53370100  |
| C | 3.86204300  | 5.78033000  | 1.00420000  |
| H | 3.01653300  | 6.07032400  | -0.95804800 |
| H | 4.40803300  | 5.31596800  | 3.03839400  |
| H | 4.78268800  | 6.31448000  | 0.78519100  |
| C | -1.23550200 | 5.88519700  | 1.48360100  |
| C | -0.81071600 | 7.15060000  | 1.54602000  |
| H | -0.10349600 | 7.42845500  | 2.32963300  |
| H | -1.95113300 | 5.61144100  | 0.70712200  |
| H | -0.55402500 | 0.60092000  | 3.06352800  |
| C | -1.22538200 | 8.25045700  | 0.61232900  |
| H | -1.69465500 | 9.08044300  | 1.15769500  |
| H | -0.35636000 | 8.67167900  | 0.08893800  |
| H | -1.93664500 | 7.89451400  | -0.14069400 |
| C | -2.84133500 | 0.86356200  | 4.49394900  |
| H | -3.90018700 | 1.14235100  | 4.48221800  |
| H | -2.72547000 | -0.07966000 | 3.94966600  |
| H | -2.55707600 | 0.67931000  | 5.53631000  |

TS-EF-4RS-8

l imaginary frequency

H = -5315.341663

G = -5315.545123

E(M06-2X-DCM) = -5316.225610

E(M06-2X-cyclohexane) = -5316.194838

|   |            |             |             |
|---|------------|-------------|-------------|
| O | 2.79381800 | -1.21742600 | 1.21695100  |
| O | 2.22186800 | -0.90023800 | -1.29122900 |
| P | 1.59551900 | -0.72859300 | 0.21487800  |
| O | 1.22234300 | 0.71706000  | 0.35496600  |
| C | 6.35803000 | 0.97203500  | 1.26588200  |
| C | 6.13068000 | 0.00838300  | 0.28862300  |
| C | 4.97362900 | -0.78428600 | 0.32440300  |
| C | 4.20097600 | 0.43740800  | 2.29447900  |
| C | 5.41268200 | 1.14984900  | 2.27667800  |
| C | 2.65441400 | -2.14251700 | -1.74974800 |

|   |             |             |             |
|---|-------------|-------------|-------------|
| C | 3.91335900  | -2.61231400 | -1.37399700 |
| C | 4.27958900  | -3.92514200 | -1.71354900 |
| C | 3.45725000  | -4.71076300 | -2.51322000 |
| C | 2.25768700  | -4.17555500 | -2.98093900 |
| C | 1.82223500  | -2.89449000 | -2.60460100 |
| H | 5.59720500  | 1.87269000  | 3.06600600  |
| H | 1.62272900  | -4.76308100 | -3.63760000 |
| C | 5.09091800  | -1.91463700 | -0.69341300 |
| C | 6.03415200  | -1.23636200 | -1.74414100 |
| H | 5.42875000  | -0.60085500 | -2.40073600 |
| H | 6.55456200  | -1.96628600 | -2.37200200 |
| H | 6.41210500  | -4.30345700 | -1.83939300 |
| H | 5.59539400  | -5.28034400 | -0.62373900 |
| C | 3.99094000  | -0.51041900 | 1.27267400  |
| H | 7.26343200  | 1.57397900  | 1.25399500  |
| H | 3.74501000  | -5.72432700 | -2.78093800 |
| C | 6.98816400  | -0.35869900 | -0.90347800 |
| H | 7.34349900  | 0.52208600  | -1.45080800 |
| H | 7.88227200  | -0.91906300 | -0.59609500 |
| C | 5.60897600  | -4.28812600 | -1.08908800 |
| C | 5.81639200  | -3.15270800 | -0.06508000 |
| H | 5.31881300  | -3.40894500 | 0.87726900  |
| H | 6.86914600  | -2.95213700 | 0.15674900  |
| C | 0.53441300  | -2.37480400 | -3.16608400 |
| C | -0.69334700 | -2.99507100 | -2.82785500 |
| C | 0.55967900  | -1.33291400 | -4.12740500 |
| C | -0.78611500 | -4.05154500 | -1.86618300 |
| C | -1.91821500 | -2.55380800 | -3.45830500 |
| C | -0.67551800 | -0.88660300 | -4.73323400 |
| C | -1.98437400 | -4.64716900 | -1.57409700 |
| H | 0.10804500  | -4.35505200 | -1.33813000 |
| C | -3.14930200 | -3.20317500 | -3.12511100 |
| C | -1.87837100 | -1.50539300 | -4.38091500 |
| C | -3.18359100 | -4.22824000 | -2.21722300 |
| H | -2.02633600 | -5.42934800 | -0.82242800 |
| H | -4.06214900 | -2.86189200 | -3.60792900 |
| H | -2.80285000 | -1.17626400 | -4.85172200 |
| H | -4.12616800 | -4.70422000 | -1.96514500 |
| C | 3.20253900  | 0.67849100  | 3.38108200  |
| C | 2.62598600  | 1.96366400  | 3.54289600  |
| C | 2.87415200  | -0.36346300 | 4.28488000  |
| C | 2.91919400  | 3.06849400  | 2.67830600  |
| C | 1.69578500  | 2.19892800  | 4.62478500  |
| C | 1.91900900  | -0.12032800 | 5.34103100  |

|   |              |              |              |
|---|--------------|--------------|--------------|
| C | 2. 38012100  | 4. 31153500  | 2. 89375000  |
| H | 3. 58325400  | 2. 91012800  | 1. 83673800  |
| C | 1. 14187300  | 3. 50563900  | 4. 80336700  |
| C | 1. 35764600  | 1. 15013900  | 5. 48252500  |
| C | 1. 47893400  | 4. 54015000  | 3. 97259700  |
| H | 2. 64208900  | 5. 13522900  | 2. 23356700  |
| H | 0. 44969600  | 3. 65959300  | 5. 62820700  |
| H | 0. 64636100  | 1. 32937500  | 6. 28625500  |
| H | 1. 06422700  | 5. 53239300  | 4. 13067900  |
| C | 1. 76900700  | 0. 26804800  | -5. 52697300 |
| H | 2. 70867400  | 0. 70607000  | -5. 85186500 |
| C | 1. 77317400  | -0. 71593200 | -4. 57280300 |
| H | 2. 71454900  | -1. 05114100 | -4. 15309000 |
| C | 0. 54690600  | 0. 72003700  | -6. 10226700 |
| H | 0. 56187100  | 1. 49802800  | -6. 86140500 |
| C | -0. 63876600 | 0. 15768200  | -5. 71054900 |
| H | -1. 57882600 | 0. 47997600  | -6. 15282900 |
| C | 3. 12548100  | -2. 65075500 | 5. 10940300  |
| H | 3. 59428600  | -3. 62837400 | 5. 03564600  |
| C | 2. 15986500  | -2. 41294600 | 6. 12774100  |
| H | 1. 89272500  | -3. 21130100 | 6. 81470700  |
| C | 1. 58001700  | -1. 17934000 | 6. 23945100  |
| H | 0. 84761700  | -0. 97759500 | 7. 01739700  |
| C | 3. 47098100  | -1. 66321200 | 4. 22508700  |
| H | 4. 21712700  | -1. 86422300 | 3. 46546000  |
| N | 0. 45350800  | -1. 85954700 | 0. 34142400  |
| S | -0. 51697500 | -2. 00512500 | 1. 58742500  |
| O | -1. 92272100 | -2. 06657100 | 1. 10968300  |
| O | -0. 24563800 | -1. 13568800 | 2. 74185200  |
| C | -0. 16528400 | -3. 73576100 | 2. 19480600  |
| F | -0. 36577200 | -4. 64616700 | 1. 23096600  |
| F | -0. 97661400 | -4. 01585200 | 3. 22021500  |
| F | 1. 10317000  | -3. 82069500 | 2. 60509000  |
| C | 0. 21794700  | 3. 69843500  | -1. 59309500 |
| C | 0. 32043500  | 3. 86523800  | -0. 04666400 |
| H | 0. 63824400  | 4. 89703000  | 0. 15491900  |
| H | 1. 09325300  | 3. 18801500  | 0. 31949800  |
| C | -0. 91247100 | 3. 61672800  | 0. 76112300  |
| C | -0. 38851200 | 2. 27944300  | -1. 92073600 |
| H | -1. 05873300 | 2. 34588300  | -2. 77885000 |
| H | 0. 42710900  | 1. 59807800  | -2. 16796000 |
| N | -1. 11247600 | 1. 60330500  | -0. 82485900 |
| C | -2. 44039400 | 1. 37115200  | -0. 77482500 |
| N | -2. 87674800 | 0. 27631400  | -0. 12719800 |



|   |             |             |             |
|---|-------------|-------------|-------------|
| C | -4.23317800 | -0.05273900 | 0.17544400  |
| C | -5.05874700 | 0.80846100  | 0.90281100  |
| C | -4.70061600 | -1.30533100 | -0.21843700 |
| C | -6.36365100 | 0.42419100  | 1.19789400  |
| C | -6.01110400 | -1.68063300 | 0.08992400  |
| H | -4.04437500 | -1.98184100 | -0.75539500 |
| C | -6.85095700 | -0.82091100 | 0.79150500  |
| H | -7.86509900 | -1.11746400 | 1.02993900  |
| C | -6.49637900 | -3.03183300 | -0.36885100 |
| C | -7.27875100 | 1.37625800  | 1.92222200  |
| F | -5.75542900 | -4.03258200 | 0.15322800  |
| F | -7.78168600 | -3.25602700 | -0.02746200 |
| F | -6.41102300 | -3.15090700 | -1.71733000 |
| F | -8.06064000 | 2.06521200  | 1.05972700  |
| F | -8.10613400 | 0.72647800  | 2.76813200  |
| F | -6.58902200 | 2.28837000  | 2.64373000  |
| S | -3.52287600 | 2.57327200  | -1.40076200 |
| H | -4.68637500 | 1.76480400  | 1.24310500  |
| H | -2.22424900 | -0.48408500 | 0.12185700  |
| H | -0.46317300 | 1.02172700  | -0.26411500 |
| C | -2.11191800 | 4.31631500  | 0.68873700  |
| H | -2.07464000 | 5.26713800  | 0.15179200  |
| H | -2.70754600 | 3.60756800  | -0.30097900 |
| C | -0.66366500 | 4.80970200  | -2.25947900 |
| H | -1.71473600 | 4.67031500  | -1.99675300 |
| H | -0.60919600 | 4.63899700  | -3.34395100 |
| C | 1.62369900  | 3.79580000  | -2.22618000 |
| C | 1.78312500  | 3.48000900  | -3.58656000 |
| C | 2.75779200  | 4.23083400  | -1.52615600 |
| C | 3.01928900  | 3.59669900  | -4.21931500 |
| H | 0.93543200  | 3.12655200  | -4.16724200 |
| C | 3.99836800  | 4.35021800  | -2.15796200 |
| H | 2.69433100  | 4.47841300  | -0.47282900 |
| C | 4.13616100  | 4.03692000  | -3.50810500 |
| H | 3.10663500  | 3.34285100  | -5.27223600 |
| H | 4.85730800  | 4.68872300  | -1.58456700 |
| H | 5.10030800  | 4.13153200  | -4.00018400 |
| C | -0.23824600 | 6.22423000  | -1.97130100 |
| C | -1.06345400 | 7.21461800  | -1.61374200 |
| H | -2.12955200 | 7.00118300  | -1.50513900 |
| H | 0.82163700  | 6.44633000  | -2.10281600 |
| H | -0.82994700 | 2.83516500  | 1.51628700  |
| C | -0.65289700 | 8.63959100  | -1.37347500 |
| H | -1.16449100 | 9.32121800  | -2.06628700 |

|   |             |            |             |
|---|-------------|------------|-------------|
| H | -0.91903800 | 8.96752000 | -0.35955400 |
| H | 0.42626700  | 8.77399400 | -1.50217100 |
| C | -3.11848100 | 4.25302400 | 1.83055600  |
| H | -4.14357700 | 4.39190700 | 1.47166700  |
| H | -3.06512300 | 3.29279700 | 2.35479900  |
| H | -2.91400500 | 5.04194200 | 2.56340400  |

TS-EF-4RS-9

1 imaginary frequency

H = -5315.339304

G = -5315.543723

E(M06-2X-DCM) = -5316.224989

E(M06-2X-cyclohexane) = -5316.193165

|   |            |             |             |
|---|------------|-------------|-------------|
| O | 2.65727800 | -1.51080300 | 1.12364700  |
| O | 2.15745800 | -0.88065700 | -1.34066500 |
| P | 1.51062700 | -0.84338500 | 0.16556200  |
| O | 1.21696700 | 0.59682500  | 0.46405100  |
| C | 6.34823800 | 0.42791600  | 1.46769800  |
| C | 6.08175800 | -0.40360000 | 0.38473100  |
| C | 4.87734300 | -1.11982600 | 0.31488200  |
| C | 4.14106900 | -0.07894500 | 2.39952000  |
| C | 5.39490000 | 0.55177300  | 2.47898100  |
| C | 2.52324600 | -2.08783300 | -1.93214400 |
| C | 3.74259600 | -2.67568700 | -1.59400700 |
| C | 4.03487900 | -3.96248500 | -2.07516000 |
| C | 3.18337100 | -4.59929900 | -2.97089000 |
| C | 2.02943100 | -3.93974100 | -3.39237500 |
| C | 1.66528000 | -2.68418400 | -2.87920600 |
| H | 5.60761900 | 1.16832900  | 3.34741400  |
| H | 1.37417500 | -4.40807500 | -4.12098400 |
| C | 4.94604700 | -2.13457400 | -0.82237000 |
| C | 5.95070600 | -1.40411600 | -1.77673800 |
| H | 5.39927400 | -0.66171300 | -2.36516300 |
| H | 6.43799500 | -2.09053200 | -2.47617600 |
| H | 6.14221300 | -4.45919600 | -2.21270600 |
| H | 5.24125900 | -5.51193100 | -1.12685500 |
| C | 3.89395400 | -0.89129500 | 1.27443100  |
| H | 7.28930700 | 0.96817800  | 1.53627800  |
| H | 3.41408300 | -5.59248900 | -3.34790500 |
| C | 6.93952000 | -0.68876100 | -0.82934500 |
| H | 7.35983500 | 0.22336800  | -1.26859200 |
| H | 7.79065900 | -1.33593700 | -0.57504500 |
| C | 5.32582800 | -4.47677200 | -1.47689900 |
| C | 5.58109900 | -3.47860400 | -0.32821600 |

|   |             |             |             |
|---|-------------|-------------|-------------|
| H | 5.04949600  | -3.80693800 | 0.57225500  |
| H | 6.63932800  | -3.37091600 | -0.07079900 |
| C | 0.42443600  | -2.02364000 | -3.39682100 |
| C | -0.84645100 | -2.59797400 | -3.14889000 |
| C | 0.53509600  | -0.88419100 | -4.23335400 |
| C | -1.02539200 | -3.74768100 | -2.31478000 |
| C | -2.02771400 | -2.01087400 | -3.74254300 |
| C | -0.65664700 | -0.29441700 | -4.80238800 |
| C | -2.26437100 | -4.29402500 | -2.10908200 |
| H | -0.16345500 | -4.16553600 | -1.81191900 |
| C | -3.30367600 | -2.61315400 | -3.50274000 |
| C | -1.90293600 | -0.87023800 | -4.53960700 |
| C | -3.42115400 | -3.72940500 | -2.71760800 |
| H | -2.37091300 | -5.15127000 | -1.45154600 |
| H | -4.18285000 | -2.16209900 | -3.95718600 |
| H | -2.79487600 | -0.43149900 | -4.98301700 |
| H | -4.39665900 | -4.16931700 | -2.53478000 |
| C | 3.13694600  | 0.10319300  | 3.49234800  |
| C | 2.64071400  | 1.39731500  | 3.79184000  |
| C | 2.72244500  | -1.01017200 | 4.26630700  |
| C | 3.02354300  | 2.57123000  | 3.06411600  |
| C | 1.70393100  | 1.56975200  | 4.87995300  |
| C | 1.76114200  | -0.82545200 | 5.32872000  |
| C | 2.56206200  | 3.81512500  | 3.41352000  |
| H | 3.69398400  | 2.46585400  | 2.21933700  |
| C | 1.23217100  | 2.88181300  | 5.19957500  |
| C | 1.27968100  | 0.45523200  | 5.60657000  |
| C | 1.65420200  | 3.97934800  | 4.49848900  |
| H | 2.89241400  | 4.68901200  | 2.85657600  |
| H | 0.53382900  | 2.98698000  | 6.02689300  |
| H | 0.56376100  | 0.58905300  | 6.41502400  |
| H | 1.30221800  | 4.97277600  | 4.76461500  |
| C | 1.87136200  | 0.78346400  | -5.42395600 |
| H | 2.84310200  | 1.19484500  | -5.68244100 |
| C | 1.79385700  | -0.29991900 | -4.58799400 |
| H | 2.70335800  | -0.73946700 | -4.19518600 |
| C | 0.69237400  | 1.37434200  | -5.96207300 |
| H | 0.77199600  | 2.23033100  | -6.62745500 |
| C | -0.53406400 | 0.84852300  | -5.65424500 |
| H | -1.44255000 | 1.27795500  | -6.07072700 |
| C | 2.80801900  | -3.38761200 | 4.82755400  |
| H | 3.21497900  | -4.37943700 | 4.64979300  |
| C | 1.83626000  | -3.20329100 | 5.85112100  |
| H | 1.50268600  | -4.05489900 | 6.43775300  |

|   |             |             |             |
|---|-------------|-------------|-------------|
| C | 1.33438000  | -1.95459100 | 6.09454500  |
| H | 0.59884000  | -1.79415100 | 6.87910700  |
| C | 3.23642900  | -2.33135000 | 4.06771800  |
| H | 3.98588200  | -2.49396700 | 3.30220800  |
| N | 0.30375600  | -1.91178300 | 0.14668500  |
| S | -0.69544300 | -2.14512500 | 1.35609200  |
| O | -2.09344200 | -2.06825800 | 0.85900300  |
| O | -0.39567500 | -1.43359400 | 2.60759300  |
| C | -0.45219300 | -3.95237100 | 1.75919800  |
| F | -0.69266700 | -4.73103500 | 0.69428200  |
| F | -1.29147400 | -4.30169100 | 2.73986600  |
| F | 0.80392200  | -4.15924700 | 2.16432000  |
| C | 0.42949700  | 3.84800800  | -1.12495000 |
| C | 0.52915900  | 3.79822700  | 0.42931400  |
| H | 0.93625500  | 4.75700300  | 0.77523000  |
| H | 1.23988400  | 3.01562400  | 0.69909100  |
| C | -0.73068400 | 3.54532300  | 1.19409900  |
| C | -0.26704400 | 2.52358500  | -1.62638400 |
| H | -0.92904200 | 2.73992100  | -2.46591000 |
| H | 0.50414000  | 1.82741800  | -1.95980700 |
| N | -1.03792600 | 1.76479600  | -0.61941400 |
| C | -2.37808600 | 1.60210700  | -0.60413700 |
| N | -2.88081800 | 0.46297800  | -0.09609500 |
| C | -4.25743400 | 0.17901000  | 0.15882900  |
| C | -5.03622500 | 0.98645100  | 0.99152700  |
| C | -4.79557200 | -0.98052200 | -0.39629200 |
| C | -6.36451900 | 0.64688900  | 1.23255400  |
| C | -6.12883100 | -1.31279500 | -0.14099800 |
| H | -4.17634600 | -1.61945500 | -1.01664600 |
| C | -6.92179100 | -0.50268400 | 0.66630400  |
| H | -7.95397000 | -0.76574200 | 0.86279200  |
| C | -6.68937100 | -2.56199900 | -0.77105500 |
| C | -7.22682700 | 1.55130700  | 2.07337000  |
| F | -6.02294100 | -3.66588000 | -0.37027500 |
| F | -7.99245700 | -2.74323300 | -0.47449700 |
| F | -6.58586100 | -2.51761500 | -2.12265100 |
| F | -7.94204700 | 2.40692300  | 1.30772700  |
| F | -8.11335800 | 0.85064400  | 2.81179500  |
| F | -6.49052000 | 2.30359000  | 2.92205400  |
| S | -3.38564300 | 2.92904000  | -1.08280700 |
| H | -4.61000600 | 1.86603300  | 1.45409800  |
| H | -2.27560000 | -0.35839700 | 0.06050200  |
| H | -0.42870900 | 1.08094500  | -0.13318100 |
| C | -1.88785500 | 4.32056000  | 1.19841700  |

|   |             |            |             |
|---|-------------|------------|-------------|
| H | -1.80014100 | 5.32317300 | 0.77301300  |
| H | -2.51831800 | 3.77308500 | 0.14430100  |
| C | -0.37753200 | 5.09094200 | -1.64534500 |
| H | -1.43619800 | 4.95442000 | -1.40447500 |
| H | -0.32214200 | 5.07712900 | -2.73953400 |
| C | 1.84078700  | 3.93606800 | -1.74148800 |
| C | 1.99255500  | 3.76041900 | -3.12733500 |
| C | 2.99007700  | 4.23392300 | -0.99769700 |
| C | 3.23742000  | 3.88018700 | -3.74279800 |
| H | 1.13149800  | 3.51692100 | -3.74402000 |
| C | 4.23959800  | 4.35381900 | -1.61058900 |
| H | 2.93194200  | 4.37270700 | 0.07571400  |
| C | 4.37072800  | 4.18104800 | -2.98655200 |
| H | 3.31865800  | 3.73676500 | -4.81689300 |
| H | 5.11097300  | 4.58330000 | -1.00287100 |
| H | 5.34219000  | 4.27653200 | -3.46400100 |
| C | 0.09476600  | 6.43151900 | -1.14942400 |
| C | 0.72506600  | 7.34476000 | -1.89396400 |
| H | 0.93270400  | 7.11288800 | -2.93981100 |
| H | -0.10666400 | 6.67224100 | -0.10294500 |
| H | -0.70813200 | 2.68121900 | 1.85788900  |
| C | 1.18730000  | 8.68890900 | -1.41166000 |
| H | 2.27375100  | 8.79790800 | -1.52960800 |
| H | 0.72662500  | 9.49971100 | -1.99197000 |
| H | 0.94274300  | 8.84661600 | -0.35557000 |
| C | -2.90016000 | 4.19217300 | 2.33071800  |
| H | -3.91167800 | 4.44127600 | 1.99407200  |
| H | -2.91365500 | 3.17520900 | 2.73708500  |
| H | -2.64538200 | 4.87316200 | 3.15071100  |

TS-EF-4RR

l imaginary frequency

H = -5315.355867

G = -5315.556113

E(M06-2X-DCM) = -5316.232829

E(M06-2X-cyclohexane) = -5316.204378

|   |            |             |             |
|---|------------|-------------|-------------|
| O | 1.03361000 | -2.84185100 | 0.19703800  |
| O | 2.79795600 | -1.01822000 | -0.28009600 |
| P | 1.19392200 | -1.23605700 | -0.09603900 |
| O | 0.74961400 | -0.39051700 | 1.05618400  |
| C | 3.02286600 | -4.39902500 | 3.53697300  |
| C | 3.67254200 | -4.28289700 | 2.31256300  |
| C | 2.98887600 | -3.81679400 | 1.17929200  |
| C | 0.98121800 | -3.49934500 | 2.53353400  |

|   |              |              |              |
|---|--------------|--------------|--------------|
| C | 1. 68171300  | -4. 02832000 | 3. 63057700  |
| C | 3. 46058100  | -1. 63348300 | -1. 34428500 |
| C | 3. 81618200  | -2. 97717600 | -1. 25042300 |
| C | 4. 30283600  | -3. 63219100 | -2. 39294200 |
| C | 4. 55556000  | -2. 92377200 | -3. 56300500 |
| C | 4. 32295800  | -1. 54754300 | -3. 58783000 |
| C | 3. 75765600  | -0. 87420700 | -2. 49304100 |
| H | 1. 15928900  | -4. 12273200 | 4. 57819000  |
| H | 4. 55763400  | -0. 97505700 | -4. 48041400 |
| C | 3. 88066900  | -3. 92430300 | -0. 05391900 |
| C | 5. 29303000  | -3. 85208100 | 0. 62470700  |
| H | 5. 54472500  | -2. 79962000 | 0. 79895400  |
| H | 6. 07977500  | -4. 28345200 | -0. 00168500 |
| H | 5. 52742600  | -5. 38992400 | -2. 03493400 |
| H | 4. 04964800  | -5. 73176000 | -2. 92735800 |
| C | 1. 66970400  | -3. 38700800 | 1. 31069200  |
| H | 3. 55008400  | -4. 76657200 | 4. 41375400  |
| H | 4. 94126300  | -3. 42763000 | -4. 44583400 |
| C | 5. 11874200  | -4. 57281000 | 1. 97784400  |
| H | 5. 81040800  | -4. 20730000 | 2. 74531900  |
| H | 5. 29601100  | -5. 65345900 | 1. 88164100  |
| C | 4. 46748200  | -5. 11355000 | -2. 12444600 |
| C | 3. 72148000  | -5. 29887700 | -0. 78320700 |
| H | 2. 65642900  | -5. 47593000 | -0. 97196600 |
| H | 4. 10027500  | -6. 13534400 | -0. 18713500 |
| C | 3. 53035300  | 0. 60329000  | -2. 54869900 |
| C | 2. 61321600  | 1. 15431700  | -3. 47705900 |
| C | 4. 28419300  | 1. 45531800  | -1. 70152700 |
| C | 1. 80776100  | 0. 35079500  | -4. 34720800 |
| C | 2. 44977900  | 2. 58938300  | -3. 55099000 |
| C | 4. 08346300  | 2. 88494600  | -1. 76384700 |
| C | 0. 94480200  | 0. 91863700  | -5. 24674900 |
| H | 1. 86165500  | -0. 72750000 | -4. 26259000 |
| C | 1. 54019300  | 3. 14136500  | -4. 50723400 |
| C | 3. 17375600  | 3. 41232800  | -2. 68458500 |
| C | 0. 81480200  | 2. 33328400  | -5. 33999400 |
| H | 0. 33457500  | 0. 28215200  | -5. 88107000 |
| H | 1. 44313100  | 4. 22380200  | -4. 55719600 |
| H | 3. 02219400  | 4. 48865400  | -2. 72192900 |
| H | 0. 12948600  | 2. 76462400  | -6. 06529700 |
| C | -0. 44798200 | -3. 09177100 | 2. 71159800  |
| C | -0. 76392400 | -1. 99180600 | 3. 54575100  |
| C | -1. 48226500 | -3. 85123900 | 2. 11291200  |
| C | 0. 23749600  | -1. 15296700 | 4. 13497900  |

|   |             |             |             |
|---|-------------|-------------|-------------|
| C | -2.14772800 | -1.66868400 | 3.81034500  |
| C | -2.86207100 | -3.50905300 | 2.37330800  |
| C | -0.09724800 | -0.09547500 | 4.94055100  |
| H | 1.27887200  | -1.35306300 | 3.91449800  |
| C | -2.45457000 | -0.56481300 | 4.66849200  |
| C | -3.15660600 | -2.43764200 | 3.22216400  |
| C | -1.46282600 | 0.20019000  | 5.22055500  |
| H | 0.68549200  | 0.53262200  | 5.35774400  |
| H | -3.50090300 | -0.34668900 | 4.87206600  |
| H | -4.19789000 | -2.20328500 | 3.43818600  |
| H | -1.71082600 | 1.03745500  | 5.86743800  |
| C | 5.96814700  | 1.81767300  | 0.03535300  |
| H | 6.70467700  | 1.41683700  | 0.72649800  |
| C | 5.26785300  | 0.96889900  | -0.78080700 |
| H | 5.46321400  | -0.09630100 | -0.73667300 |
| C | 5.74253400  | 3.22231300  | -0.00997200 |
| H | 6.30262400  | 3.87865900  | 0.65069800  |
| C | 4.82978800  | 3.73739800  | -0.88984500 |
| H | 4.64564400  | 4.80688300  | -0.93909300 |
| C | -2.24921200 | -5.69440200 | 0.70334500  |
| H | -2.02480900 | -6.54112400 | 0.06031000  |
| C | -3.60649900 | -5.34538400 | 0.95385200  |
| H | -4.40494900 | -5.92638400 | 0.50021500  |
| C | -3.89979600 | -4.28638300 | 1.76983500  |
| H | -4.93277200 | -4.01630300 | 1.97722300  |
| C | -1.22669500 | -4.97717000 | 1.26660500  |
| H | -0.19934100 | -5.26219000 | 1.07171400  |
| N | 0.54738700  | -1.02065700 | -1.56649900 |
| S | -0.97721200 | -1.16301300 | -1.91078800 |
| O | -1.41843800 | -0.19228000 | -2.92653700 |
| O | -1.87762600 | -1.31030300 | -0.72733300 |
| C | -1.11314200 | -2.81450700 | -2.77640900 |
| F | -0.32976900 | -2.82771100 | -3.86063400 |
| F | -2.38414700 | -3.01209800 | -3.16669900 |
| F | -0.75324600 | -3.80960800 | -1.96501400 |
| C | -5.08726500 | 0.50380200  | -0.22487500 |
| C | -4.39936600 | 0.75004700  | -1.59901100 |
| H | -5.15725300 | 0.70210600  | -2.39421500 |
| H | -3.72904900 | -0.08627500 | -1.79529600 |
| C | -3.61609700 | 1.99821500  | -1.79078600 |
| C | -4.09285100 | 0.90126300  | 0.93178200  |
| H | -4.42640000 | 1.81257200  | 1.42427100  |
| H | -4.07022500 | 0.09833600  | 1.67772000  |
| N | -2.70618300 | 1.13168400  | 0.50997200  |

|   |             |             |             |
|---|-------------|-------------|-------------|
| C | -1.94694400 | 2.17636300  | 0.94344100  |
| N | -0.62076200 | 1.96836700  | 0.99176500  |
| C | 0.39365400  | 2.91828900  | 1.29547600  |
| C | 0.49008900  | 4.15256900  | 0.64818500  |
| C | 1.35402600  | 2.54520700  | 2.24028300  |
| C | 1.52528500  | 5.02417700  | 0.98353600  |
| C | 2.38582100  | 3.42610300  | 2.56171700  |
| H | 1.28327900  | 1.57424100  | 2.71608900  |
| C | 2.47391400  | 4.67291700  | 1.94498200  |
| H | 3.26432100  | 5.36339700  | 2.21383800  |
| C | 3.43317000  | 3.00963900  | 3.56189800  |
| C | 1.65721000  | 6.33985700  | 0.26345100  |
| F | 2.92915700  | 2.16738000  | 4.49391800  |
| F | 4.46753100  | 2.37258200  | 2.97362800  |
| F | 3.94681700  | 4.07572700  | 4.21631000  |
| F | 2.12991300  | 7.30884500  | 1.07581500  |
| F | 2.52113800  | 6.25959300  | -0.78364900 |
| F | 0.47936200  | 6.76426700  | -0.24007300 |
| S | -2.69286600 | 3.69243700  | 1.29530500  |
| H | -0.23624000 | 4.43576500  | -0.10105600 |
| H | -0.25959100 | 0.99027400  | 0.96449900  |
| H | -2.21105900 | 0.28096300  | 0.20212600  |
| C | -3.99656800 | 3.31670400  | -1.48738500 |
| H | -5.05734900 | 3.45694600  | -1.26130600 |
| H | -3.52922500 | 3.43485900  | -0.33294700 |
| C | -5.34971900 | -1.04437200 | -0.12964200 |
| H | -5.81461000 | -1.23198200 | 0.84880700  |
| H | -4.37923800 | -1.55298200 | -0.12904800 |
| C | -6.42565200 | 1.23891400  | -0.02462100 |
| C | -6.99179300 | 1.28908400  | 1.26249500  |
| C | -7.16357100 | 1.81124600  | -1.07106800 |
| C | -8.22347400 | 1.89763700  | 1.49643200  |
| H | -6.46637300 | 0.84210800  | 2.10227500  |
| C | -8.39929600 | 2.42342700  | -0.84221100 |
| H | -6.78563800 | 1.78887700  | -2.08804900 |
| C | -8.93539200 | 2.47254600  | 0.44252900  |
| H | -8.62652400 | 1.92091200  | 2.50534900  |
| H | -8.94018500 | 2.86055100  | -1.67738300 |
| H | -9.89504700 | 2.94916100  | 0.62133500  |
| C | -6.22095900 | -1.61292200 | -1.21497300 |
| C | -5.80021100 | -2.49196100 | -2.13139800 |
| H | -4.75942200 | -2.81727000 | -2.10895700 |
| H | -2.64452300 | 1.84846000  | -2.26631300 |
| H | -7.26048800 | -1.28157200 | -1.23374800 |



|   |             |             |             |
|---|-------------|-------------|-------------|
| C | -3.33909600 | 4.47434100  | -2.24175300 |
| H | -3.40802200 | 5.40144300  | -1.66488400 |
| H | -2.28086000 | 4.26948900  | -2.43517500 |
| H | -3.83356100 | 4.63653900  | -3.20572700 |
| C | -6.65608700 | -3.08615700 | -3.21265200 |
| H | -6.69735800 | -4.18057100 | -3.12782600 |
| H | -7.68211200 | -2.70419600 | -3.17449400 |
| H | -6.24566300 | -2.86771100 | -4.20778300 |

TS-EF-4RR-1

l imaginary frequency

H = -5315.352248

G = -5315.553997

E(M06-2X-DCM) = -5316.230949

E(M06-2X-cyclohexane) = -5316.202796

|   |            |             |             |
|---|------------|-------------|-------------|
| O | 1.50113900 | -2.77058800 | 0.00458600  |
| O | 2.94455600 | -0.63852800 | -0.19731800 |
| P | 1.39676200 | -1.14879300 | -0.19975900 |
| O | 0.70129700 | -0.46934600 | 0.93987100  |
| C | 3.48272400 | -4.22889600 | 3.39074400  |
| C | 4.18833100 | -3.91572100 | 2.23351000  |
| C | 3.51842200 | -3.47717400 | 1.08118800  |
| C | 1.39601000 | -3.58708000 | 2.28741200  |
| C | 2.09594300 | -4.08090100 | 3.40098100  |
| C | 3.79677500 | -1.03661100 | -1.22925900 |
| C | 4.36791400 | -2.30664700 | -1.20167600 |
| C | 5.04706000 | -2.76858900 | -2.34051900 |
| C | 5.26875100 | -1.92562700 | -3.42466000 |
| C | 4.81142100 | -0.60743500 | -3.36665900 |
| C | 4.05397900 | -0.13718500 | -2.28245800 |
| H | 1.53225800 | -4.32655400 | 4.29639700  |
| H | 5.01784100 | 0.07380200  | -4.18700500 |
| C | 4.50077600 | -3.33391200 | -0.07816000 |
| C | 5.82946600 | -3.09368000 | 0.72115800  |
| H | 5.88889300 | -2.03292300 | 0.99076200  |
| H | 6.71984700 | -3.33838900 | 0.13410200  |
| H | 6.51492900 | -4.33533000 | -2.00805600 |
| H | 5.18677200 | -4.82494000 | -3.05367000 |
| C | 2.14015600 | -3.27811100 | 1.13285700  |
| H | 4.00107000 | -4.57588700 | 4.28108700  |
| H | 5.80186400 | -2.27925200 | -4.30371500 |
| C | 5.68223800 | -3.94386100 | 2.00006100  |
| H | 6.24917800 | -3.53928000 | 2.84617200  |
| H | 6.04081000 | -4.97089600 | 1.84155800  |

|   |              |              |              |
|---|--------------|--------------|--------------|
| C | 5. 43393500  | -4. 22329000 | -2. 17145900 |
| C | 4. 62795500  | -4. 64506700 | -0. 92100200 |
| H | 3. 62456700  | -4. 97102000 | -1. 21816300 |
| H | 5. 09377400  | -5. 46084100 | -0. 35879000 |
| C | 3. 58408500  | 1. 28300900  | -2. 23776800 |
| C | 2. 64571400  | 1. 76289100  | -3. 18415500 |
| C | 4. 12463100  | 2. 16131000  | -1. 26364900 |
| C | 2. 05150000  | 0. 92751100  | -4. 18420500 |
| C | 2. 23640300  | 3. 14968200  | -3. 14175700 |
| C | 3. 68436500  | 3. 53685200  | -1. 21773600 |
| C | 1. 15524800  | 1. 42789800  | -5. 09124100 |
| H | 2. 29364500  | -0. 12790600 | -4. 19540500 |
| C | 1. 29918800  | 3. 63239100  | -4. 10899500 |
| C | 2. 75305100  | 3. 99273700  | -2. 15484800 |
| C | 0. 77853000  | 2. 80058800  | -5. 06343700 |
| H | 0. 70653700  | 0. 76435800  | -5. 82448300 |
| H | 1. 01676000  | 4. 68234800  | -4. 07022700 |
| H | 2. 41815000  | 5. 02643500  | -2. 10863000 |
| H | 0. 07144400  | 3. 18002800  | -5. 79683900 |
| C | -0. 08775800 | -3. 40893900 | 2. 37633800  |
| C | -0. 62243400 | -2. 42586800 | 3. 24479500  |
| C | -0. 95226200 | -4. 26139400 | 1. 64804900  |
| C | 0. 19802800  | -1. 49694700 | 3. 96427400  |
| C | -2. 05429800 | -2. 31940900 | 3. 40924600  |
| C | -2. 38322500 | -4. 13123500 | 1. 80512600  |
| C | -0. 34744200 | -0. 55654100 | 4. 79954600  |
| H | 1. 27130200  | -1. 53223200 | 3. 82227800  |
| C | -2. 58323100 | -1. 33392000 | 4. 30218100  |
| C | -2. 89330200 | -3. 17581600 | 2. 68963000  |
| C | -1. 75861500 | -0. 47767800 | 4. 98069100  |
| H | 0. 30087500  | 0. 14567000  | 5. 31695300  |
| H | -3. 66262400 | -1. 28025800 | 4. 42792400  |
| H | -3. 97090000 | -3. 10604900 | 2. 83058900  |
| H | -2. 17431100 | 0. 26791700  | 5. 65329700  |
| C | 5. 60840900  | 2. 62606400  | 0. 62481400  |
| H | 6. 35846700  | 2. 28721700  | 1. 33439800  |
| C | 5. 11694700  | 1. 75662600  | -0. 31315400 |
| H | 5. 48890600  | 0. 73903400  | -0. 34518900 |
| C | 5. 14822200  | 3. 97178900  | 0. 68220700  |
| H | 5. 54443900  | 4. 64397800  | 1. 43853600  |
| C | 4. 21716600  | 4. 41194400  | -0. 21888300 |
| H | 3. 85508600  | 5. 43596500  | -0. 19128700 |
| C | -1. 33467200 | -6. 08781600 | 0. 07060300  |
| H | -0. 94190000 | -6. 84830500 | -0. 59878400 |

|   |             |             |             |
|---|-------------|-------------|-------------|
| C | -2.74354200 | -5.94388100 | 0.21712200  |
| H | -3.41195400 | -6.59279300 | -0.34240600 |
| C | -3.24925200 | -4.99542300 | 1.06428100  |
| H | -4.32355800 | -4.87913000 | 1.18953000  |
| C | -0.47248400 | -5.27956400 | 0.76361300  |
| H | 0.59728000  | -5.40673900 | 0.64426300  |
| N | 0.86624200  | -0.95993900 | -1.71745500 |
| S | -0.54919700 | -1.38967600 | -2.25100000 |
| O | -1.03278800 | -0.49245700 | -3.31393400 |
| O | -1.54128300 | -1.72412800 | -1.18637600 |
| C | -0.26498500 | -3.01151100 | -3.13843400 |
| F | 0.63753200  | -2.83983700 | -4.11168700 |
| F | -1.41635500 | -3.42358700 | -3.68530800 |
| F | 0.17533100  | -3.95015800 | -2.29827000 |
| C | -5.05185500 | -0.16043700 | -0.83375300 |
| C | -4.23901300 | 0.08371500  | -2.14361400 |
| H | -4.92206700 | 0.03586300  | -3.00246400 |
| H | -3.53025100 | -0.73724600 | -2.26658300 |
| C | -3.47862900 | 1.36637000  | -2.24976700 |
| C | -4.04828300 | -0.07562900 | 0.37459100  |
| H | -4.47434800 | 0.45157200  | 1.22337500  |
| H | -3.81783300 | -1.09226500 | 0.70222900  |
| N | -2.72848400 | 0.52161100  | 0.09723600  |
| C | -2.24736900 | 1.65157400  | 0.67466500  |
| N | -0.92617200 | 1.69458400  | 0.90006400  |
| C | -0.14970800 | 2.78570100  | 1.37470900  |
| C | -0.22578300 | 4.06951300  | 0.82805100  |
| C | 0.76845600  | 2.51009500  | 2.39267200  |
| C | 0.59065300  | 5.07901600  | 1.33545900  |
| C | 1.58009300  | 3.53034200  | 2.88699400  |
| H | 0.83434000  | 1.50423300  | 2.79186600  |
| C | 1.49109300  | 4.82158700  | 2.37048300  |
| H | 2.10845700  | 5.61661500  | 2.77123200  |
| C | 2.58590500  | 3.22000700  | 3.96570000  |
| C | 0.54861600  | 6.45436900  | 0.72415000  |
| F | 2.13923400  | 2.25450300  | 4.80291100  |
| F | 3.75607600  | 2.78540700  | 3.45301900  |
| F | 2.86231900  | 4.30953500  | 4.71662800  |
| F | 0.71490900  | 7.41905300  | 1.65346400  |
| F | 1.53813400  | 6.62850100  | -0.19264800 |
| F | -0.61607300 | 6.69368200  | 0.08682300  |
| S | -3.33047500 | 2.96739600  | 0.95672200  |
| H | -0.91449200 | 4.28265800  | 0.02237600  |
| H | -0.39095900 | 0.79655700  | 0.86666100  |

|   |             |             |             |
|---|-------------|-------------|-------------|
| H | -2.04414100 | -0.18454700 | -0.20849800 |
| C | -3.96319700 | 2.65510900  | -2.02681500 |
| H | -5.04999500 | 2.75957600  | -1.98590000 |
| H | -3.76715000 | 2.73996300  | -0.73353900 |
| C | -5.57264900 | -1.64313400 | -0.91109000 |
| H | -4.69161600 | -2.28789000 | -1.04193800 |
| H | -6.18512200 | -1.75170900 | -1.81347400 |
| C | -6.28737700 | 0.76547600  | -0.73235000 |
| C | -6.67485100 | 1.43636700  | 0.43600700  |
| C | -7.14188300 | 0.88407800  | -1.84515800 |
| C | -7.83857700 | 2.20914700  | 0.48397200  |
| H | -6.07414300 | 1.38356400  | 1.33507300  |
| C | -8.30373200 | 1.65277200  | -1.80393300 |
| H | -6.90857000 | 0.36294400  | -2.76937800 |
| C | -8.65872200 | 2.32719500  | -0.63487900 |
| H | -8.09731300 | 2.71971700  | 1.40776600  |
| H | -8.93199100 | 1.72078800  | -2.68824100 |
| H | -9.56172500 | 2.93012100  | -0.59774500 |
| C | -6.36557200 | -2.10396500 | 0.28219300  |
| C | -7.64266800 | -2.49451800 | 0.24550000  |
| H | -8.16981900 | -2.47180900 | -0.71001900 |
| H | -2.44459300 | 1.25627300  | -2.58049900 |
| H | -5.84204100 | -2.12836200 | 1.23991800  |
| C | -3.20970400 | 3.85857900  | -2.58525600 |
| H | -3.37122400 | 4.74785900  | -1.96752600 |
| H | -2.13280000 | 3.66525500  | -2.63918500 |
| H | -3.55808000 | 4.08880000  | -3.59856300 |
| C | -8.43797700 | -2.97282200 | 1.42560300  |
| H | -8.80928000 | -3.99447700 | 1.26827000  |
| H | -7.84160300 | -2.96704400 | 2.34438200  |
| H | -9.32083700 | -2.34036200 | 1.58944000  |

TS-EF-4RR-2

l imaginary frequency

H = -5315.346919

G = -5315.548491

E(M06-2X-DCM) = -5316.227191

E(M06-2X-cyclohexane) = -5316.200086

|   |             |             |             |
|---|-------------|-------------|-------------|
| O | -3.03312700 | -0.80015400 | -0.93680000 |
| O | -2.37998500 | -1.38155700 | 1.50675800  |
| P | -1.96720000 | -0.42077600 | 0.24541900  |
| O | -2.02502500 | 0.98240800  | 0.73239200  |
| C | -7.10229000 | -0.16926500 | -0.19959300 |
| C | -6.47833600 | -1.34053700 | 0.21757000  |

|   |             |             |             |
|---|-------------|-------------|-------------|
| C | -5.13066700 | -1.58147300 | -0.08926700 |
| C | -5.00322200 | 0.58921400  | -1.20384900 |
| C | -6.36978300 | 0.76735500  | -0.92880400 |
| C | -2.32801800 | -2.76914200 | 1.39645000  |
| C | -3.35331800 | -3.44950700 | 0.74047200  |
| C | -3.20049600 | -4.82006000 | 0.47452300  |
| C | -2.11270900 | -5.52433100 | 0.97808300  |
| C | -1.17159500 | -4.85052100 | 1.75614500  |
| C | -1.24292200 | -3.46364600 | 1.96945700  |
| H | -6.85290100 | 1.67219600  | -1.28580500 |
| H | -0.34316500 | -5.39791000 | 2.19571100  |
| C | -4.74912600 | -3.00425500 | 0.30510700  |
| C | -5.78737500 | -3.25598600 | 1.45319400  |
| H | -5.39484200 | -2.82332100 | 2.38076900  |
| H | -5.96367200 | -4.32097000 | 1.63171900  |
| H | -5.03450300 | -5.94629500 | 0.18344900  |
| H | -3.97916600 | -5.94039100 | -1.22541500 |
| C | -4.39564700 | -0.59151700 | -0.73647100 |
| H | -8.14861400 | 0.01570700  | 0.03031500  |
| H | -1.99923600 | -6.58776300 | 0.78313300  |
| C | -7.05337100 | -2.48778700 | 1.01829900  |
| H | -7.65575700 | -2.14825000 | 1.86866200  |
| H | -7.70918700 | -3.11530400 | 0.39833200  |
| C | -4.33490900 | -5.32396000 | -0.39192000 |
| C | -5.00070900 | -4.01286700 | -0.86449100 |
| H | -4.48711500 | -3.64220900 | -1.75890000 |
| H | -6.06313200 | -4.12292800 | -1.10371600 |
| C | -0.21619300 | -2.80617100 | 2.83769400  |
| C | 1.15540500  | -2.85218700 | 2.47983000  |
| C | -0.60438900 | -2.24283100 | 4.08183400  |
| C | 1.61792100  | -3.37871900 | 1.22902700  |
| C | 2.15274200  | -2.34956600 | 3.39914800  |
| C | 0.40198500  | -1.70436700 | 4.96914900  |
| C | 2.95604900  | -3.46043500 | 0.94006700  |
| H | 0.89012100  | -3.69779000 | 0.49347700  |
| C | 3.53828000  | -2.45595100 | 3.05864300  |
| C | 1.74957700  | -1.77885600 | 4.60835000  |
| C | 3.93577400  | -3.01068300 | 1.87221100  |
| H | 3.27320300  | -3.86139200 | -0.01855500 |
| H | 4.27168700  | -2.09263700 | 3.77522500  |
| H | 2.50435500  | -1.39713200 | 5.29330400  |
| H | 4.99260000  | -3.08903900 | 1.63171100  |
| C | -4.27365600 | 1.62298300  | -2.00296800 |
| C | -4.09997900 | 2.92792200  | -1.47984000 |

|   |             |             |             |
|---|-------------|-------------|-------------|
| C | -3.83936000 | 1.31976900  | -3.31741700 |
| C | -4.49326900 | 3.29135800  | -0.15080500 |
| C | -3.49599800 | 3.95291500  | -2.30187300 |
| C | -3.20821000 | 2.34621200  | -4.11545800 |
| C | -4.34747700 | 4.57292500  | 0.31323100  |
| H | -4.89948600 | 2.52619000  | 0.49973600  |
| C | -3.36183800 | 5.27874800  | -1.77968900 |
| C | -3.06010300 | 3.63255300  | -3.59015800 |
| C | -3.78345200 | 5.58706800  | -0.51334500 |
| H | -4.65524500 | 4.81840100  | 1.32599600  |
| H | -2.92671000 | 6.04190800  | -2.42169200 |
| H | -2.60414200 | 4.40678100  | -4.20470200 |
| H | -3.68825500 | 6.60102100  | -0.13330100 |
| C | -2.30387200 | -1.66171100 | 5.74379700  |
| H | -3.34421500 | -1.65379200 | 6.05770800  |
| C | -1.96281400 | -2.21016900 | 4.53520000  |
| H | -2.73541500 | -2.63826100 | 3.90813400  |
| C | -1.31004800 | -1.10783900 | 6.59959300  |
| H | -1.59848300 | -0.67970000 | 7.55583300  |
| C | 0.00476300  | -1.13485700 | 6.21991400  |
| H | 0.77921100  | -0.73467800 | 6.87037300  |
| C | -3.59163400 | -0.22542500 | -5.19407300 |
| H | -3.73944900 | -1.21311900 | -5.62221700 |
| C | -2.94944300 | 0.78316700  | -5.96613300 |
| H | -2.60989300 | 0.55638500  | -6.97309900 |
| C | -2.76911700 | 2.03272800  | -5.43952000 |
| H | -2.28992100 | 2.81687800  | -6.02121500 |
| C | -4.02329600 | 0.03476500  | -3.92045700 |
| H | -4.51669900 | -0.74522400 | -3.35293200 |
| N | -0.53923600 | -0.97739500 | -0.32686400 |
| S | -0.09019900 | -1.12952100 | -1.84006000 |
| O | 1.35008700  | -1.50291900 | -1.82890100 |
| O | -0.48656500 | -0.04356000 | -2.75014900 |
| C | -0.86623000 | -2.69764700 | -2.54113300 |
| F | -0.82951200 | -3.67414000 | -1.62398900 |
| F | -0.15826500 | -3.07827100 | -3.60816000 |
| F | -2.13373700 | -2.50813300 | -2.91599600 |
| C | 0.30570200  | 3.62260000  | 1.17944600  |
| C | -0.14565200 | 3.44346500  | -0.30646000 |
| H | -0.66988900 | 4.35041600  | -0.63646100 |
| H | -0.89066400 | 2.64498600  | -0.32419600 |
| C | 0.91901400  | 3.13268400  | -1.30869300 |
| C | 0.94627000  | 2.26494200  | 1.64370700  |
| H | 1.73935000  | 2.41933800  | 2.37077000  |

|   |             |             |             |
|---|-------------|-------------|-------------|
| H | 0.16037500  | 1.68528700  | 2.12816800  |
| N | 1.47238100  | 1.35618100  | 0.59748200  |
| C | 2.77548700  | 1.14703200  | 0.30963500  |
| N | 3.09603200  | -0.01285300 | -0.29176200 |
| C | 4.37746100  | -0.41105600 | -0.75701400 |
| C | 4.48780200  | -0.91109400 | -2.05831300 |
| C | 5.48830100  | -0.40459400 | 0.08854600  |
| C | 5.72141500  | -1.37920000 | -2.51266800 |
| C | 6.71118200  | -0.88508100 | -0.37748700 |
| H | 5.39151700  | -0.05957400 | 1.11012600  |
| C | 6.83978100  | -1.36868900 | -1.67921200 |
| H | 7.79181800  | -1.74573500 | -2.03248300 |
| C | 7.86187300  | -0.98837100 | 0.58757500  |
| C | 5.85742300  | -1.84684200 | -3.93956200 |
| F | 7.91002200  | 0.06709600  | 1.42736600  |
| F | 7.74618100  | -2.09797700 | 1.36066900  |
| F | 9.05080600  | -1.06765300 | -0.04346500 |
| F | 6.84532000  | -2.75867200 | -4.07351500 |
| F | 4.71824900  | -2.40523100 | -4.39463600 |
| F | 6.15465000  | -0.81852700 | -4.76741400 |
| S | 3.90879900  | 2.43291800  | 0.53485900  |
| H | 3.60994100  | -0.95326900 | -2.69355800 |
| H | 2.33128900  | -0.63276200 | -0.60771500 |
| H | 0.82628800  | 0.59341800  | 0.35650600  |
| C | 2.10716000  | 3.82832300  | -1.51423600 |
| H | 2.15527500  | 4.83445500  | -1.09173600 |
| H | 2.84211500  | 3.27597200  | -0.55139000 |
| C | -1.01564400 | 3.81750300  | 2.01558700  |
| H | -1.69940500 | 3.00615700  | 1.75217200  |
| H | -1.47495800 | 4.75623400  | 1.67828900  |
| C | 1.16727900  | 4.88562000  | 1.41089000  |
| C | 2.21450700  | 4.94931600  | 2.34249400  |
| C | 0.81704800  | 6.08944900  | 0.76968000  |
| C | 2.90027900  | 6.14057600  | 2.59424400  |
| H | 2.52169500  | 4.06732200  | 2.89029800  |
| C | 1.49959000  | 7.28076800  | 1.01381200  |
| H | -0.01181200 | 6.11018000  | 0.06820200  |
| C | 2.55381600  | 7.31311800  | 1.92718300  |
| H | 3.71077200  | 6.14277400  | 3.31830800  |
| H | 1.19996400  | 8.18541900  | 0.49093600  |
| H | 3.08964300  | 8.23834600  | 2.12015200  |
| C | -0.82490000 | 3.85473400  | 3.50757000  |
| C | -1.34813200 | 2.95464300  | 4.34785300  |
| H | -1.93984900 | 2.13531400  | 3.93593900  |

|   |             |            |             |
|---|-------------|------------|-------------|
| H | -0.23471600 | 4.67775900 | 3.91339800  |
| H | 0.72599900  | 2.26817000 | -1.94770900 |
| C | 2.92736200  | 3.60475500 | -2.77829900 |
| H | 3.98674500  | 3.81587100 | -2.60263800 |
| H | 2.58248700  | 4.26697400 | -3.58071700 |
| H | 2.84021400  | 2.57228200 | -3.13226700 |
| C | -1.19715600 | 2.97462200 | 5.84167800  |
| H | -2.17324100 | 3.07230400 | 6.33703200  |
| H | -0.75798900 | 2.03569300 | 6.20377600  |
| H | -0.56463700 | 3.80506700 | 6.17448800  |

TS-EF-4RR-3

l imaginary frequency

H = -5315.343308

G = -5315.545961

E(M06-2X-DCM) = -5316.226524

E(M06-2X-cyclohexane) = -5316.197701

|   |             |             |             |
|---|-------------|-------------|-------------|
| O | -3.03900300 | -1.27254500 | -0.51412100 |
| O | -2.34268600 | -0.66674900 | 1.90848300  |
| P | -1.97614000 | -0.37050700 | 0.33831600  |
| O | -2.07826700 | 1.09989000  | 0.14813100  |
| C | -7.11287800 | -0.44314400 | -0.06150000 |
| C | -6.45783200 | -1.28817200 | 0.82861500  |
| C | -5.10781300 | -1.61985800 | 0.63848900  |
| C | -5.04128000 | -0.18257500 | -1.33709500 |
| C | -6.40888000 | 0.07735900  | -1.14780400 |
| C | -2.25689100 | -1.95041500 | 2.43928000  |
| C | -3.27534400 | -2.87079000 | 2.19344000  |
| C | -3.09276700 | -4.20810500 | 2.58206100  |
| C | -1.98285200 | -4.58579400 | 3.32931200  |
| C | -1.04495400 | -3.61726800 | 3.68589200  |
| C | -1.14379300 | -2.28973600 | 3.23627300  |
| H | -6.91539200 | 0.71798400  | -1.86384400 |
| H | -0.19672400 | -3.89041000 | 4.30634400  |
| C | -4.68681600 | -2.69823700 | 1.63126200  |
| C | -5.70739300 | -2.41541600 | 2.78791600  |
| H | -5.31736700 | -1.59888900 | 3.40667200  |
| H | -5.85486600 | -3.28349700 | 3.43742400  |
| H | -4.90272700 | -5.37236300 | 2.87583600  |
| H | -3.86138800 | -5.99590800 | 1.60089600  |
| C | -4.40409200 | -1.01847900 | -0.40124400 |
| H | -8.16103800 | -0.19169700 | 0.08006400  |
| H | -1.84815100 | -5.61775600 | 3.64343600  |
| C | -6.99659500 | -1.95482600 | 2.07507300  |



|   |             |             |             |
|---|-------------|-------------|-------------|
| H | -7.60037100 | -1.27649000 | 2.68871500  |
| H | -7.64093200 | -2.80876100 | 1.82232100  |
| C | -4.22365500 | -5.07182500 | 2.06573600  |
| C | -4.92442800 | -4.13454900 | 1.05781200  |
| H | -4.42751600 | -4.20575500 | 0.08355400  |
| H | -5.98593100 | -4.36025800 | 0.91527900  |
| C | -0.10784200 | -1.29587400 | 3.65931000  |
| C | 1.25645400  | -1.50847200 | 3.33214200  |
| C | -0.47449800 | -0.19929000 | 4.48404000  |
| C | 1.69779600  | -2.57143600 | 2.47673100  |
| C | 2.26855300  | -0.62546000 | 3.86970500  |
| C | 0.54424000  | 0.70692300  | 4.96601900  |
| C | 3.03023900  | -2.78750000 | 2.23502300  |
| H | 0.95766400  | -3.20005500 | 1.99782600  |
| C | 3.64815300  | -0.88964900 | 3.59589400  |
| C | 1.88502300  | 0.46440600  | 4.65491700  |
| C | 4.02561200  | -1.95062000 | 2.81759800  |
| H | 3.33086600  | -3.59981500 | 1.57926700  |
| H | 4.39324800  | -0.22926500 | 4.03429000  |
| H | 2.65056000  | 1.12936200  | 5.05068700  |
| H | 5.07774800  | -2.14192000 | 2.62421800  |
| C | -4.32985100 | 0.39995800  | -2.51751300 |
| C | -4.15681300 | 1.80208700  | -2.61729300 |
| C | -3.89744100 | -0.44761000 | -3.56696300 |
| C | -4.55752500 | 2.71042900  | -1.58458200 |
| C | -3.54729300 | 2.36365800  | -3.80213200 |
| C | -3.26386300 | 0.12580200  | -4.73235200 |
| C | -4.41721100 | 4.06619700  | -1.73121600 |
| H | -4.96926000 | 2.30832500  | -0.66682400 |
| C | -3.41066900 | 3.78355500  | -3.91189500 |
| C | -3.11047200 | 1.51169900  | -4.81992700 |
| C | -3.84290700 | 4.61566900  | -2.91394600 |
| H | -4.73822100 | 4.73021800  | -0.93316300 |
| H | -2.96393900 | 4.18789100  | -4.81771700 |
| H | -2.64881100 | 1.93875700  | -5.70838100 |
| H | -3.74836100 | 5.69375100  | -3.01743200 |
| C | -2.14287600 | 1.11851500  | 5.69489700  |
| H | -3.17540600 | 1.27694100  | 5.99413100  |
| C | -1.82160300 | 0.04652300  | 4.90422200  |
| H | -2.60123900 | -0.63769800 | 4.59261800  |
| C | -1.13923100 | 2.02714100  | 6.13455000  |
| H | -1.41339800 | 2.87379100  | 6.75813400  |
| C | 0.16648500  | 1.81917300  | 5.78258600  |
| H | 0.94881400  | 2.49156200  | 6.12753700  |

|   |             |             |             |
|---|-------------|-------------|-------------|
| C | -3.65357800 | -2.65805500 | -4.57899800 |
| H | -3.80372500 | -3.73330400 | -4.53290700 |
| C | -3.00990600 | -2.08931300 | -5.71405400 |
| H | -2.67114000 | -2.73400900 | -6.52048500 |
| C | -2.82614100 | -0.73574900 | -5.78604800 |
| H | -2.34430000 | -0.28581800 | -6.65104500 |
| C | -4.08347800 | -1.86672000 | -3.54702100 |
| H | -4.57758500 | -2.31891400 | -2.69510000 |
| N | -0.53389900 | -1.08982300 | 0.04873400  |
| S | -0.10895500 | -1.89852900 | -1.25179600 |
| O | 1.34573300  | -2.18759200 | -1.12306100 |
| O | -0.56984300 | -1.35802600 | -2.53680600 |
| C | -0.83439800 | -3.63468500 | -1.12970600 |
| F | -0.75844600 | -4.07720300 | 0.13364200  |
| F | -0.12176100 | -4.44635000 | -1.91586000 |
| F | -2.11019900 | -3.67376200 | -1.52141600 |
| C | 0.36792900  | 3.70024300  | 0.30098700  |
| C | -0.13646600 | 3.27088800  | -1.11581900 |
| H | -0.55062700 | 4.14678100  | -1.63083800 |
| H | -0.96523600 | 2.57666600  | -0.96138800 |
| C | 0.85863400  | 2.61964300  | -2.02376100 |
| C | 0.96465000  | 2.42948500  | 1.01390700  |
| H | 1.76209900  | 2.70930900  | 1.69867900  |
| H | 0.16368200  | 1.97133400  | 1.59595500  |
| N | 1.47399900  | 1.32366900  | 0.17329000  |
| C | 2.78197000  | 1.05652600  | -0.05479200 |
| N | 3.10394100  | -0.21498100 | -0.34858600 |
| C | 4.37754300  | -0.72980800 | -0.70442100 |
| C | 4.44919200  | -1.62712900 | -1.77593300 |
| C | 5.51994400  | -0.44343300 | 0.04522600  |
| C | 5.67230100  | -2.21150500 | -2.10426500 |
| C | 6.73270600  | -1.04502200 | -0.28953600 |
| H | 5.45812400  | 0.21388700  | 0.90251300  |
| C | 6.82165700  | -1.92537400 | -1.36649900 |
| H | 7.76603000  | -2.39311900 | -1.61657700 |
| C | 7.91854800  | -0.81133900 | 0.60800400  |
| C | 5.76462800  | -3.11792300 | -3.30554800 |
| F | 8.01798300  | 0.48229200  | 0.98056700  |
| F | 7.81171100  | -1.53792200 | 1.74977400  |
| F | 9.08069100  | -1.16158100 | 0.02154200  |
| F | 6.74568900  | -4.03586800 | -3.16239600 |
| F | 4.61144300  | -3.77946900 | -3.52541900 |
| F | 6.04210300  | -2.41681800 | -4.42938700 |
| S | 3.89684100  | 2.37067600  | -0.16016300 |

|   |             |             |             |
|---|-------------|-------------|-------------|
| H | 3.54931800  | -1.88054900 | -2.32543600 |
| H | 2.34199300  | -0.91171900 | -0.42981900 |
| H | 0.83227800  | 0.51839200  | 0.13154700  |
| C | 2.06364800  | 3.15287000  | -2.47680600 |
| H | 2.17727600  | 4.23523100  | -2.38504700 |
| H | 2.81750400  | 2.89889300  | -1.42067500 |
| C | -0.89539900 | 4.09700000  | 1.16199900  |
| H | -0.55350100 | 4.25987900  | 2.19228700  |
| H | -1.56153600 | 3.22542800  | 1.16883600  |
| C | 1.31337200  | 4.91973100  | 0.30666600  |
| C | 2.11390800  | 5.20553900  | 1.42546000  |
| C | 1.29944300  | 5.87893700  | -0.71861700 |
| C | 2.89565400  | 6.35822600  | 1.49545900  |
| H | 2.13338600  | 4.52893300  | 2.27380600  |
| C | 2.08304500  | 7.03361800  | -0.65904900 |
| H | 0.65880800  | 5.74492400  | -1.58385800 |
| C | 2.89402300  | 7.27782600  | 0.44698400  |
| H | 3.50794900  | 6.53432200  | 2.37597400  |
| H | 2.04726100  | 7.74533700  | -1.47985000 |
| H | 3.50619700  | 8.17399900  | 0.49693000  |
| C | -1.65941800 | 5.30363900  | 0.69476800  |
| C | -1.75769900 | 6.45404900  | 1.36747200  |
| H | -1.23040400 | 6.55283700  | 2.31823700  |
| H | -2.19551200 | 5.20065300  | -0.24955200 |
| H | 0.59248400  | 1.62222600  | -2.37819300 |
| C | 2.80296900  | 2.51245300  | -3.64450100 |
| H | 3.87790300  | 2.70860800  | -3.58409500 |
| H | 2.44128200  | 2.91675300  | -4.59688600 |
| H | 2.65613600  | 1.42746300  | -3.66201300 |
| C | -2.54629200 | 7.65285300  | 0.92477600  |
| H | -3.31567000 | 7.92031600  | 1.66198400  |
| H | -1.89951400 | 8.53395800  | 0.81392700  |
| H | -3.04466700 | 7.47596700  | -0.03469300 |

TS-1-1-4SS

1 imaginary frequency

H = -5315.337149

G = -5315.534679

E(M06-2X-DCM) = -5316.214504

|   |            |            |             |
|---|------------|------------|-------------|
| C | 2.54780900 | 4.16290000 | -0.16067300 |
| C | 1.49802600 | 4.37857200 | 0.97729700  |
| H | 2.01208100 | 4.82626700 | 1.83677900  |
| H | 0.77946700 | 5.11554800 | 0.60517400  |
| C | 0.72738300 | 3.19681400 | 1.47536200  |

|   |              |              |              |
|---|--------------|--------------|--------------|
| C | 1. 73594700  | 3. 77024800  | -1. 43094300 |
| H | 2. 38390400  | 3. 33630600  | -2. 19697100 |
| H | 1. 31165000  | 4. 68339200  | -1. 85017600 |
| N | 0. 60918300  | 2. 87641800  | -1. 19978300 |
| C | -0. 69373700 | 3. 20961600  | -1. 53054600 |
| N | -1. 50300700 | 2. 10825100  | -1. 52944500 |
| C | -2. 85375000 | 1. 91431400  | -1. 85789900 |
| C | -3. 85615400 | 2. 89452700  | -1. 82456600 |
| C | -3. 20043300 | 0. 59572800  | -2. 19995500 |
| C | -5. 16872400 | 2. 54342300  | -2. 14362900 |
| C | -4. 51386400 | 0. 26880200  | -2. 52073700 |
| H | -2. 43274400 | -0. 17143300 | -2. 21444000 |
| C | -5. 51430000 | 1. 24056900  | -2. 50289900 |
| H | -6. 53545300 | 0. 99070000  | -2. 76411900 |
| C | -4. 85734100 | -1. 16595500 | -2. 81237200 |
| C | -6. 26009400 | 3. 57380700  | -2. 01121500 |
| F | -3. 86651900 | -1. 80155400 | -3. 48119100 |
| F | -5. 98395000 | -1. 28605000 | -3. 54143200 |
| F | -5. 05528000 | -1. 87368200 | -1. 66502900 |
| F | -5. 80267000 | 4. 83054800  | -2. 16804500 |
| F | -6. 84248200 | 3. 51500700  | -0. 78472500 |
| F | -7. 24583600 | 3. 37912800  | -2. 91507000 |
| S | -1. 18940300 | 4. 78868000  | -1. 85103800 |
| H | -3. 60865400 | 3. 91219800  | -1. 55994300 |
| C | 1. 15354100  | 2. 17950500  | 2. 32929500  |
| H | -1. 02362100 | 1. 22859700  | -1. 30751200 |
| H | 0. 81470200  | 1. 87747500  | -1. 16283100 |
| H | 1. 22254400  | 1. 02150400  | 1. 69594200  |
| O | -1. 11535600 | -1. 50015200 | 0. 74712900  |
| O | 1. 12123400  | -2. 34274200 | -0. 32995900 |
| P | 0. 35463500  | -1. 01972100 | 0. 23363200  |
| O | 0. 11612500  | 0. 01428000  | -0. 81960100 |
| C | -1. 85470200 | -4. 85689700 | 3. 16800000  |
| C | -1. 45072100 | -5. 01105000 | 1. 84816300  |
| C | -1. 29679400 | -3. 89598500 | 1. 00930000  |
| C | -1. 90298700 | -2. 42482000 | 2. 86048800  |
| C | -2. 12394600 | -3. 57654500 | 3. 63903500  |
| C | 0. 65288300  | -2. 84536200 | -1. 56444000 |
| C | -0. 48433900 | -3. 64935300 | -1. 56708300 |
| C | -1. 08466100 | -3. 98891900 | -2. 79065300 |
| C | -0. 49270100 | -3. 62629200 | -3. 99431200 |
| C | 0. 71259700  | -2. 92891700 | -3. 96761600 |
| C | 1. 30656900  | -2. 50623100 | -2. 76474600 |
| H | -2. 50625800 | -3. 44387900 | 4. 64588400  |

|   |              |              |              |
|---|--------------|--------------|--------------|
| H | 1. 20965600  | -2. 67387000 | -4. 89865700 |
| C | -1. 19174200 | -4. 37858100 | -0. 43448800 |
| C | -0. 54792300 | -5. 78858300 | -0. 21569400 |
| H | -0. 71715100 | -6. 45884900 | -1. 06398800 |
| H | 0. 53454800  | -5. 66503500 | -0. 09600500 |
| H | -3. 19263700 | -4. 35156000 | -3. 17831700 |
| H | -2. 26277700 | -5. 80742000 | -2. 82128000 |
| C | -1. 41344400 | -2. 61431300 | 1. 55032700  |
| H | -1. 99230200 | -5. 71955200 | 3. 81476000  |
| H | -0. 95111200 | -3. 89142500 | -4. 94343700 |
| C | -1. 16518600 | -6. 29541100 | 1. 10283300  |
| H | -2. 08747900 | -6. 86527900 | 0. 92353100  |
| H | -0. 49027700 | -6. 95703900 | 1. 65781300  |
| C | -2. 37463800 | -4. 74465600 | -2. 56585800 |
| C | -2. 62108000 | -4. 54260200 | -1. 05636200 |
| H | -3. 18337400 | -5. 35865400 | -0. 59310300 |
| H | -3. 18816600 | -3. 61831200 | -0. 90218400 |
| C | 2. 61512200  | -1. 78605500 | -2. 86927200 |
| C | 3. 81314600  | -2. 45426600 | -2. 51402200 |
| C | 2. 66746800  | -0. 51648900 | -3. 49503300 |
| C | 3. 83048000  | -3. 75632500 | -1. 91965400 |
| C | 5. 08748100  | -1. 83000300 | -2. 79151600 |
| C | 3. 94898100  | 0. 08277500  | -3. 79305900 |
| C | 5. 00765300  | -4. 37770700 | -1. 59441300 |
| H | 2. 88891800  | -4. 25554300 | -1. 72258500 |
| C | 6. 29302700  | -2. 51097500 | -2. 43336400 |
| C | 5. 12113600  | -0. 58760600 | -3. 43202300 |
| C | 6. 25867000  | -3. 74730500 | -1. 84754900 |
| H | 4. 98893000  | -5. 36360800 | -1. 13822100 |
| H | 7. 24164800  | -2. 02305200 | -2. 64506700 |
| H | 6. 08395100  | -0. 13793100 | -3. 66756200 |
| H | 7. 18143000  | -4. 25516800 | -1. 58091200 |
| C | -2. 28782300 | -1. 11209200 | 3. 46741800  |
| C | -3. 33203800 | -0. 33978100 | 2. 89316600  |
| C | -1. 72254300 | -0. 72516000 | 4. 71173500  |
| C | -4. 00778300 | -0. 70646400 | 1. 68513700  |
| C | -3. 78877300 | 0. 85757300  | 3. 56564900  |
| C | -2. 23430500 | 0. 43957000  | 5. 39943600  |
| C | -5. 00153300 | 0. 07315000  | 1. 15401800  |
| H | -3. 73438000 | -1. 62713500 | 1. 18439100  |
| C | -4. 81216500 | 1. 65664300  | 2. 96389600  |
| C | -3. 24154900 | 1. 20279300  | 4. 80395400  |
| C | -5. 39765400 | 1. 28652500  | 1. 78415100  |
| H | -5. 49203800 | -0. 24202900 | 0. 23981900  |

|   |             |             |             |
|---|-------------|-------------|-------------|
| H | -5.11711800 | 2.56760300  | 3.47382500  |
| H | -3.61152000 | 2.08768900  | 5.31844100  |
| H | -6.15735500 | 1.90951100  | 1.32086700  |
| C | 1.57242000  | 1.42215000  | -4.50833800 |
| H | 0.66409200  | 1.95354900  | -4.77875100 |
| C | 1.49097900  | 0.21284200  | -3.86710000 |
| H | 0.52241500  | -0.20491100 | -3.62118900 |
| C | 2.83900900  | 1.99610300  | -4.82137400 |
| H | 2.88392400  | 2.94984100  | -5.34015600 |
| C | 3.99056000  | 1.34530000  | -4.46596100 |
| H | 4.96348300  | 1.77452300  | -4.69396700 |
| C | -0.12251600 | -1.03399600 | 6.53596500  |
| H | 0.71477100  | -1.57674200 | 6.96567600  |
| C | -0.66324500 | 0.08530900  | 7.22922100  |
| H | -0.25147500 | 0.37406100  | 8.19252800  |
| C | -1.68425300 | 0.80374300  | 6.66866300  |
| H | -2.09568000 | 1.67385800  | 7.17531500  |
| C | -0.63150600 | -1.42577600 | 5.32414300  |
| H | -0.17881800 | -2.25771200 | 4.79917000  |
| N | 1.30361000  | -0.42647700 | 1.44088500  |
| S | 2.20511800  | -1.28718200 | 2.50680700  |
| C | 3.70871900  | -1.87971900 | 1.51317900  |
| O | 1.54522600  | -2.51989100 | 2.94589900  |
| O | 2.73931000  | -0.33499100 | 3.48107200  |
| F | 3.55657200  | -3.16211500 | 1.18936900  |
| F | 3.86164600  | -1.15578400 | 0.40364200  |
| F | 4.79586100  | -1.74747900 | 2.27750000  |
| H | -0.34479800 | 3.23035300  | 1.27884700  |
| H | 2.18607200  | 2.24464200  | 2.67462200  |
| C | 3.66194100  | 3.18144400  | 0.24780300  |
| C | 4.24918400  | 3.26997100  | 1.52481600  |
| C | 4.20030700  | 2.23651800  | -0.63627300 |
| C | 5.30942300  | 2.44894900  | 1.90434400  |
| H | 3.88196700  | 3.99626600  | 2.24243400  |
| C | 5.26697000  | 1.41502100  | -0.26189100 |
| H | 3.79860300  | 2.11569100  | -1.63557300 |
| C | 5.82590700  | 1.51221500  | 1.00920900  |
| H | 5.72540500  | 2.53962800  | 2.90405300  |
| H | 5.64006000  | 0.68146600  | -0.96940400 |
| H | 6.64346000  | 0.86059200  | 1.30410300  |
| C | 3.18635100  | 5.56005000  | -0.51007200 |
| H | 3.79620800  | 5.40601500  | -1.41225000 |
| H | 2.36861200  | 6.23459400  | -0.79295900 |
| C | 4.02619100  | 6.22962000  | 0.54264500  |

|   |             |            |            |
|---|-------------|------------|------------|
| H | 4.99049100  | 5.77540500 | 0.76672600 |
| C | 3.67490200  | 7.34967800 | 1.18475900 |
| H | 2.71394700  | 7.81178900 | 0.94872200 |
| C | 0.14167000  | 1.74513700 | 3.40469500 |
| H | -0.84231000 | 1.54486500 | 2.97243700 |
| H | 0.49723200  | 0.84680000 | 3.90684800 |
| H | 0.03188800  | 2.53378200 | 4.15692000 |
| C | 4.51079200  | 8.05718700 | 2.21251300 |
| H | 4.74714000  | 9.08131700 | 1.89351000 |
| H | 3.97786300  | 8.14421700 | 3.16906500 |
| H | 5.45482500  | 7.53300500 | 2.39537200 |

TS-1-1-4RS

1 imaginary frequency

H = -5315.338489

G = -5315.538954

E(M06-2X-DCM) = -5316.217345

|   |             |            |             |
|---|-------------|------------|-------------|
| C | 4.50434100  | 0.90247400 | -1.34957700 |
| C | 3.63978600  | 0.87653800 | -2.65492600 |
| H | 4.19667400  | 0.27734600 | -3.38639600 |
| H | 3.56273800  | 1.90536800 | -3.02112200 |
| C | 2.25326100  | 0.32304100 | -2.60645100 |
| C | 3.79789600  | 1.82356000 | -0.30134600 |
| H | 4.16137700  | 1.57766900 | 0.70146200  |
| H | 4.06334000  | 2.86066300 | -0.50855100 |
| N | 2.34037900  | 1.76980700 | -0.29515600 |
| C | 1.55003600  | 2.90890700 | -0.44098200 |
| N | 0.24157000  | 2.62917400 | -0.19284200 |
| C | -0.88290300 | 3.46985900 | -0.07145400 |
| C | -1.11592000 | 4.61553300 | -0.84088500 |
| C | -1.85739300 | 3.04707600 | 0.84431200  |
| C | -2.31329800 | 5.31594800 | -0.68020000 |
| C | -3.03678100 | 3.76980900 | 1.00559400  |
| H | -1.67623600 | 2.15659800 | 1.43536500  |
| C | -3.27810900 | 4.91286900 | 0.24338100  |
| H | -4.19831700 | 5.47212500 | 0.35935100  |
| C | -4.01310900 | 3.33966000 | 2.06611900  |
| C | -2.61704400 | 6.45526300 | -1.61587400 |
| F | -4.10284000 | 1.98994300 | 2.15130900  |
| F | -3.64091300 | 3.77624400 | 3.29728900  |
| F | -5.25502500 | 3.81506900 | 1.84255300  |
| F | -3.49157900 | 7.33442100 | -1.08053300 |
| F | -1.51039000 | 7.13920500 | -1.96623800 |
| F | -3.17725300 | 5.99681200 | -2.76653300 |

|   |             |             |             |
|---|-------------|-------------|-------------|
| S | 2.15894700  | 4.40719800  | -0.89726700 |
| H | -0.37661600 | 4.94571600  | -1.55705000 |
| C | 1.87717500  | -1.01878000 | -2.68271200 |
| H | -0.01785200 | 1.63489200  | -0.14960900 |
| H | 2.70145400  | -1.72728600 | -2.80016000 |
| H | 1.93934800  | 1.05488600  | 0.30356200  |
| H | 1.43462100  | -1.34626100 | -1.49767300 |
| O | -1.80816700 | -2.18793400 | -0.04484600 |
| O | -0.59100200 | -0.62688500 | 1.65301900  |
| P | -0.58955200 | -1.13114700 | 0.09957700  |
| O | -0.69563400 | 0.10796500  | -0.72053500 |
| C | -5.68059600 | -0.67397800 | 0.50348600  |
| C | -4.92089400 | -1.08967100 | 1.59061900  |
| C | -3.65179300 | -1.66062900 | 1.40322200  |
| C | -3.87337400 | -1.33186300 | -1.00959600 |
| C | -5.16363500 | -0.82379600 | -0.78205200 |
| C | -0.54320300 | -1.44645700 | 2.79013200  |
| C | -1.63602700 | -2.24360800 | 3.12511300  |
| C | -1.47746500 | -3.21465400 | 4.12727700  |
| C | -0.31320800 | -3.27169000 | 4.88454600  |
| C | 0.68832900  | -2.33017600 | 4.65520500  |
| C | 0.60724700  | -1.40386400 | 3.60223900  |
| H | -5.75405400 | -0.52171400 | -1.64180300 |
| H | 1.56882600  | -2.31193500 | 5.28998600  |
| C | -3.11133300 | -2.18037100 | 2.72936300  |
| C | -3.87763900 | -1.23377800 | 3.72051900  |
| H | -3.94093300 | -1.64965300 | 4.73017800  |
| H | -3.33844300 | -0.28151500 | 3.78284200  |
| H | -3.26543300 | -3.88656300 | 5.15920800  |
| H | -2.46762200 | -5.15136200 | 4.23123400  |
| C | -3.12628600 | -1.72229900 | 0.11752500  |
| H | -6.66430900 | -0.23532300 | 0.64886200  |
| H | -0.19508500 | -4.01481700 | 5.66887700  |
| C | -5.25077100 | -0.99332300 | 3.06201400  |
| H | -5.67841500 | -0.02053000 | 3.32664800  |
| H | -5.98158400 | -1.75841000 | 3.35906400  |
| C | -2.71312300 | -4.08327200 | 4.23001200  |
| C | -3.52857200 | -3.66473200 | 2.98651100  |
| H | -3.22602500 | -4.26800500 | 2.12280800  |
| H | -4.60936300 | -3.77873800 | 3.11588500  |
| C | 1.68099300  | -0.36994800 | 3.46589500  |
| C | 3.03083400  | -0.75977000 | 3.26591400  |
| C | 1.36288200  | 0.99818700  | 3.68424100  |
| C | 3.41645800  | -2.11517400 | 3.00198000  |



|   |              |              |              |
|---|--------------|--------------|--------------|
| C | 4. 07973100  | 0. 23526900  | 3. 32417300  |
| C | 2. 41804900  | 1. 98735500  | 3. 68039700  |
| C | 4. 73383900  | -2. 46387700 | 2. 84909700  |
| H | 2. 64615300  | -2. 86959100 | 2. 89893900  |
| C | 5. 44288200  | -0. 17568800 | 3. 17671500  |
| C | 3. 74496800  | 1. 57817200  | 3. 51929900  |
| C | 5. 76533000  | -1. 48777800 | 2. 95255200  |
| H | 4. 99365500  | -3. 49700200 | 2. 63718500  |
| H | 6. 21912400  | 0. 58263400  | 3. 25474900  |
| H | 4. 53644500  | 2. 32440700  | 3. 55341800  |
| H | 6. 80416200  | -1. 78759700 | 2. 84420500  |
| C | -3. 39211000 | -1. 45759000 | -2. 42089800 |
| C | -3. 18884500 | -0. 29233300 | -3. 20242900 |
| C | -3. 25490500 | -2. 74219000 | -3. 00341400 |
| C | -3. 28655700 | 1. 03453300  | -2. 66764800 |
| C | -2. 85753900 | -0. 42524100 | -4. 60399100 |
| C | -2. 89448800 | -2. 85777100 | -4. 39869600 |
| C | -3. 10760300 | 2. 13937600  | -3. 45973300 |
| H | -3. 49029400 | 1. 15822700  | -1. 61086500 |
| C | -2. 67980800 | 0. 75301200  | -5. 39546900 |
| C | -2. 71439400 | -1. 69956500 | -5. 15992900 |
| C | -2. 80755800 | 1. 99927200  | -4. 84517400 |
| H | -3. 18518700 | 3. 13585000  | -3. 03350400 |
| H | -2. 44056800 | 0. 63248700  | -6. 44959800 |
| H | -2. 46312000 | -1. 79248600 | -6. 21480400 |
| H | -2. 67321300 | 2. 88681500  | -5. 45750200 |
| C | -0. 24165700 | 2. 79424500  | 4. 12768000  |
| H | -1. 26503600 | 3. 11454200  | 4. 30090100  |
| C | 0. 03290200  | 1. 46305700  | 3. 94605500  |
| H | -0. 77243200 | 0. 74111900  | 4. 01086400  |
| C | 0. 79808900  | 3. 76525800  | 4. 07576800  |
| H | 0. 56114200  | 4. 81670400  | 4. 21021100  |
| C | 2. 09036000  | 3. 36706000  | 3. 86886900  |
| H | 2. 89770000  | 4. 09460000  | 3. 84203500  |
| C | -3. 34694400 | -5. 18177700 | -2. 87323100 |
| H | -3. 52947700 | -6. 08454900 | -2. 29650700 |
| C | -2. 96577200 | -5. 28924700 | -4. 24073300 |
| H | -2. 85516000 | -6. 27059300 | -4. 69390400 |
| C | -2. 75126600 | -4. 15716600 | -4. 97902300 |
| H | -2. 47235000 | -4. 22318000 | -6. 02812300 |
| C | -3. 48950500 | -3. 95514900 | -2. 27915500 |
| H | -3. 78864000 | -3. 89603400 | -1. 23913800 |
| N | 0. 74967400  | -1. 98942400 | -0. 34826700 |
| S | 1. 21445300  | -3. 50227900 | 0. 06029400  |

|   |             |             |             |
|---|-------------|-------------|-------------|
| C | 0.10879600  | -4.71947300 | -0.86572500 |
| O | 2.53701600  | -3.70611300 | -0.53243400 |
| O | 0.96636500  | -3.81685000 | 1.46901700  |
| F | 0.74199500  | -5.89558500 | -0.88654400 |
| F | -0.10158100 | -4.32000200 | -2.12426400 |
| F | -1.06105600 | -4.87027800 | -0.24663900 |
| C | 5.87898200  | 1.55100200  | -1.62363000 |
| C | 6.78772500  | 1.68519700  | -0.55781500 |
| C | 6.27367400  | 2.04624800  | -2.87390500 |
| C | 8.03033700  | 2.29081600  | -0.73386400 |
| H | 6.52679500  | 1.30863800  | 0.42704200  |
| C | 7.52070300  | 2.65045200  | -3.05493100 |
| H | 5.61540200  | 1.96835700  | -3.73210400 |
| C | 8.40541800  | 2.77787100  | -1.98687200 |
| H | 8.70726300  | 2.37983200  | 0.11184300  |
| H | 7.79436800  | 3.02221000  | -4.03881500 |
| H | 9.37432200  | 3.24896300  | -2.12719000 |
| C | 4.72403600  | -0.54695600 | -0.81538200 |
| H | 5.23548800  | -0.46390000 | 0.15287500  |
| H | 3.76481100  | -1.02948700 | -0.59781300 |
| C | 5.55351900  | -1.41580400 | -1.73014500 |
| C | 5.28016700  | -2.67963600 | -2.07287100 |
| H | 4.38232500  | -3.15658800 | -1.68365200 |
| H | 6.47336700  | -0.96256000 | -2.10228300 |
| H | 1.44313700  | 1.04828300  | -2.66056700 |
| C | 0.60950000  | -1.34046700 | -3.49300700 |
| H | 0.24590000  | -2.34076000 | -3.26042200 |
| H | -0.18672500 | -0.62621900 | -3.27289400 |
| H | 0.83389100  | -1.29741100 | -4.56469100 |
| C | 6.16113300  | -3.52975200 | -2.94472900 |
| H | 7.04285300  | -2.98002000 | -3.29251200 |
| H | 6.50753000  | -4.42103600 | -2.40394400 |
| H | 5.61720400  | -3.89589700 | -3.82621800 |

TS-1-1-4SR

1 imaginary frequency

H = -5315.339219

G = -5315.541071

E(M06-2X-DCM) = -5316.219950

|   |            |            |            |
|---|------------|------------|------------|
| C | 3.66226700 | 2.06163500 | 2.02032800 |
| C | 2.69588100 | 1.91661200 | 3.26710400 |
| H | 3.24916400 | 1.38094500 | 4.04382000 |
| H | 2.49050200 | 2.93178800 | 3.62479900 |
| C | 1.39422600 | 1.22279700 | 3.07380300 |

|   |             |             |             |
|---|-------------|-------------|-------------|
| C | 2.96683700  | 2.99305700  | 0.99952000  |
| H | 3.54015400  | 3.02052400  | 0.06471300  |
| H | 2.91775400  | 4.00711200  | 1.39575700  |
| N | 1.59071400  | 2.61657300  | 0.70052300  |
| C | 0.54483200  | 3.52521300  | 0.70287700  |
| N | -0.56035800 | 3.00265800  | 0.09014500  |
| C | -1.81783100 | 3.52775500  | -0.24474800 |
| C | -2.22264500 | 4.86197800  | -0.10297100 |
| C | -2.71198100 | 2.60025400  | -0.81470600 |
| C | -3.49920700 | 5.24155100  | -0.52682200 |
| C | -3.97292000 | 3.00271300  | -1.23529400 |
| H | -2.41166300 | 1.56290600  | -0.91902100 |
| C | -4.38532400 | 4.33017500  | -1.09467900 |
| H | -5.37043000 | 4.64340600  | -1.41864200 |
| C | -4.88956300 | 2.00973600  | -1.89622400 |
| C | -3.94158700 | 6.66582200  | -0.30390600 |
| F | -4.58792600 | 0.73257300  | -1.55367600 |
| F | -4.82571300 | 2.07187100  | -3.24712200 |
| F | -6.18213900 | 2.21701500  | -1.55561900 |
| F | -4.90440900 | 7.03439600  | -1.17909900 |
| F | -2.91941200 | 7.53707700  | -0.43405700 |
| F | -4.45164600 | 6.83737100  | 0.93723900  |
| S | 0.64706800  | 5.03353800  | 1.44510200  |
| H | -1.54999800 | 5.58888000  | 0.32855400  |
| C | 1.16841500  | -0.14702800 | 3.24149100  |
| H | -0.47144700 | 2.01435900  | -0.16770900 |
| H | 1.46112700  | 1.80906100  | 0.09346100  |
| H | 1.04710100  | -0.66637100 | 2.08649900  |
| O | -1.75858600 | -1.43507900 | -0.00613900 |
| O | 0.24862100  | -1.97277200 | -1.59972500 |
| P | -0.17198700 | -1.14682400 | -0.26090100 |
| O | -0.02338000 | 0.33342600  | -0.40188900 |
| C | -3.53721000 | -5.24518400 | -0.10636300 |
| C | -3.08441000 | -4.64492300 | -1.27414200 |
| C | -2.58538600 | -3.33322900 | -1.26022900 |
| C | -2.94353400 | -3.22445200 | 1.14996200  |
| C | -3.51071700 | -4.51104500 | 1.07398800  |
| C | -0.23754000 | -1.45920700 | -2.82120000 |
| C | -1.54419600 | -1.75708900 | -3.19846800 |
| C | -2.11294300 | -1.09323700 | -4.29681000 |
| C | -1.34718600 | -0.23707200 | -5.07936100 |
| C | -0.00213300 | -0.06080100 | -4.76388300 |
| C | 0.58320900  | -0.64776500 | -3.62707800 |
| H | -3.92702000 | -4.93686700 | 1.98115200  |

|   |             |             |             |
|---|-------------|-------------|-------------|
| H | 0.62278800  | 0.56441900  | -5.39426500 |
| C | -2.49926600 | -2.82674800 | -2.69613100 |
| C | -2.25585500 | -4.17134200 | -3.45884600 |
| H | -2.52885400 | -4.10269700 | -4.51650800 |
| H | -1.19008600 | -4.42074300 | -3.40195100 |
| H | -4.20418200 | -0.56509800 | -4.56291700 |
| H | -3.74047300 | -2.08347400 | -5.33210600 |
| C | -2.40853100 | -2.68138100 | -0.03771300 |
| H | -3.93896300 | -6.25507800 | -0.11575800 |
| H | -1.78025200 | 0.27369700  | -5.93548600 |
| C | -3.07919800 | -5.21353200 | -2.67555600 |
| H | -4.09984600 | -5.30288700 | -3.07272500 |
| H | -2.63809800 | -6.21608500 | -2.71533600 |
| C | -3.57363300 | -1.45426800 | -4.44702400 |
| C | -3.87270700 | -2.21349300 | -3.13641200 |
| H | -4.64988100 | -2.97585800 | -3.24376600 |
| H | -4.20574000 | -1.50380700 | -2.37403900 |
| C | 2.04568300  | -0.42291200 | -3.41090000 |
| C | 2.95640100  | -1.49203900 | -3.60409500 |
| C | 2.52758400  | 0.89131200  | -3.19193300 |
| C | 2.53773400  | -2.83335100 | -3.88006800 |
| C | 4.37792500  | -1.23181400 | -3.56920400 |
| C | 3.95093000  | 1.14239700  | -3.20159000 |
| C | 3.44647200  | -3.84191900 | -4.06483200 |
| H | 1.47801800  | -3.05072400 | -3.94340200 |
| C | 5.29316400  | -2.31383800 | -3.76120100 |
| C | 4.83451500  | 0.07583400  | -3.38485100 |
| C | 4.84500700  | -3.58499000 | -3.99674600 |
| H | 3.09801400  | -4.85095800 | -4.26735400 |
| H | 6.35838500  | -2.09837800 | -3.72290400 |
| H | 5.90504500  | 0.26879400  | -3.39480900 |
| H | 5.54997500  | -4.39890100 | -4.14204000 |
| C | -3.04987400 | -2.52312200 | 2.46875800  |
| C | -3.85227800 | -1.35773100 | 2.59482400  |
| C | -2.50181200 | -3.13520900 | 3.62738700  |
| C | -4.49162900 | -0.71761800 | 1.48406700  |
| C | -4.09330900 | -0.79685200 | 3.90707400  |
| C | -2.78220500 | -2.58004200 | 4.93327200  |
| C | -5.27343400 | 0.39653400  | 1.64881400  |
| H | -4.36169200 | -1.12933000 | 0.49119000  |
| C | -4.90332000 | 0.37508300  | 4.03442500  |
| C | -3.56185900 | -1.42585500 | 5.03569100  |
| C | -5.47731100 | 0.96023300  | 2.93950400  |
| H | -5.74814300 | 0.85270000  | 0.78625700  |

|   |             |             |             |
|---|-------------|-------------|-------------|
| H | -5.06063800 | 0.78361200  | 5.02998400  |
| H | -3.76915700 | -1.01079100 | 6.02023900  |
| H | -6.09508200 | 1.84730200  | 3.04902500  |
| C | 2.15239100  | 3.27833700  | -2.80478400 |
| H | 1.47010500  | 4.10688200  | -2.63631300 |
| C | 1.65835700  | 2.00925700  | -2.96812400 |
| H | 0.58977300  | 1.83579000  | -2.92063000 |
| C | 3.55536300  | 3.52408400  | -2.84816200 |
| H | 3.92770800  | 4.53819200  | -2.73138100 |
| C | 4.42512000  | 2.48225700  | -3.03412700 |
| H | 5.49853300  | 2.65530800  | -3.06531100 |
| C | -1.14668700 | -4.85972200 | 4.71007700  |
| H | -0.48722600 | -5.71909600 | 4.63065100  |
| C | -1.45880100 | -4.33023600 | 5.99355900  |
| H | -1.05618600 | -4.80373600 | 6.88495700  |
| C | -2.24848400 | -3.21736800 | 6.09706000  |
| H | -2.48334800 | -2.79005800 | 7.06929400  |
| C | -1.64914700 | -4.28643800 | 3.57052100  |
| H | -1.37104600 | -4.68952500 | 2.60426600  |
| N | 0.78225600  | -1.69100600 | 0.96605600  |
| S | 1.25125100  | -3.21747300 | 1.29855700  |
| C | 2.93984600  | -3.33922300 | 0.49818700  |
| O | 0.42585700  | -4.22783200 | 0.63160700  |
| O | 1.53447700  | -3.30535400 | 2.73306900  |
| F | 2.87864600  | -3.04861700 | -0.79887400 |
| F | 3.78535900  | -2.48955300 | 1.09941500  |
| F | 3.39738600  | -4.58421600 | 0.65429100  |
| H | 0.52271400  | 1.85145500  | 2.90104100  |
| H | 2.02634700  | -0.71471900 | 3.61322600  |
| C | -0.17573600 | -0.58241900 | 3.84451200  |
| H | -1.01999500 | -0.09413500 | 3.34895000  |
| H | -0.28293600 | -1.66016300 | 3.73973200  |
| H | -0.20792500 | -0.33380200 | 4.91043700  |
| C | 4.97314300  | 2.68351400  | 2.54224200  |
| C | 5.73771200  | 1.98766300  | 3.49469600  |
| C | 5.45971900  | 3.92300800  | 2.10441700  |
| C | 6.92574700  | 2.50994700  | 3.99900900  |
| H | 5.40961000  | 1.01323900  | 3.84683400  |
| C | 6.65419700  | 4.44955600  | 2.60493800  |
| H | 4.92115200  | 4.50028900  | 1.36193200  |
| C | 7.39123000  | 3.74992400  | 3.55646300  |
| H | 7.48991300  | 1.94522000  | 4.73653600  |
| H | 7.00178100  | 5.41426400  | 2.24501700  |
| H | 8.31738600  | 4.16147100  | 3.94805200  |

|   |            |             |             |
|---|------------|-------------|-------------|
| C | 3.94484700 | 0.65375100  | 1.40551900  |
| H | 4.12885000 | -0.06533700 | 2.21128200  |
| H | 3.03277500 | 0.30454400  | 0.90158000  |
| C | 5.10479300 | 0.60964500  | 0.44636400  |
| H | 5.08034100 | 1.30717600  | -0.39059000 |
| C | 6.13441800 | -0.23386100 | 0.55489000  |
| H | 6.14924700 | -0.94004400 | 1.38673000  |
| C | 7.29980200 | -0.30973500 | -0.38799300 |
| H | 8.24951700 | -0.16466300 | 0.14425000  |
| H | 7.35629000 | -1.29472000 | -0.87136300 |
| H | 7.23315500 | 0.45080900  | -1.17287300 |

TS-1-2-4SS

l imaginary frequency

H = -5315.334952

G = -5315.538852

E(M06-2X-DCM) = -5316.222705

|   |             |             |             |
|---|-------------|-------------|-------------|
| O | -1.90025900 | 1.17874900  | 1.42163000  |
| O | -2.90350600 | -1.15330400 | 0.81250900  |
| P | -1.72318800 | -0.10232200 | 0.42272400  |
| O | -1.89687100 | 0.46420200  | -0.97325000 |
| N | -0.30639700 | -0.77822900 | 0.78459800  |
| S | 0.09413100  | -2.31761900 | 0.66126600  |
| C | -0.20948500 | -3.02572300 | 2.36916800  |
| F | 0.05557500  | -4.33336300 | 2.35494600  |
| F | 0.58273200  | -2.43613100 | 3.27490100  |
| F | -1.48444100 | -2.84148100 | 2.73269500  |
| C | 0.78361400  | 2.89729300  | -2.91056900 |
| C | 0.98700300  | 1.66113200  | -3.87035600 |
| H | 0.43967400  | 1.86940500  | -4.79613500 |
| H | 2.05402000  | 1.61377500  | -4.09954800 |
| C | 0.56580100  | 0.32004300  | -3.38052100 |
| C | 1.53392000  | 2.62058700  | -1.56088500 |
| H | 0.98237400  | 3.02554100  | -0.71504100 |
| H | 2.48680200  | 3.14750100  | -1.59298900 |
| N | 1.83355000  | 1.21676400  | -1.24959400 |
| C | 3.11064300  | 0.69739400  | -1.40061400 |
| N | 3.29001700  | -0.49198200 | -0.76178100 |
| C | 4.49113900  | -1.23704300 | -0.64712300 |
| C | 5.71546800  | -0.62885400 | -0.35703200 |
| C | 4.41635700  | -2.63224000 | -0.73589800 |
| C | 6.85000900  | -1.41508600 | -0.15906900 |
| C | 5.56262100  | -3.40391300 | -0.54533000 |
| H | 3.46180000  | -3.10920200 | -0.92353900 |

|   |              |              |              |
|---|--------------|--------------|--------------|
| C | 6. 78851300  | -2. 80406400 | -0. 25599600 |
| H | 7. 67360500  | -3. 40744300 | -0. 09698800 |
| C | 5. 48893100  | -4. 89889200 | -0. 71457700 |
| C | 8. 12436600  | -0. 72724000 | 0. 24964900  |
| F | 4. 27400200  | -5. 38555200 | -0. 38926900 |
| F | 6. 40353800  | -5. 53450100 | 0. 05221700  |
| F | 5. 73099500  | -5. 26486300 | -1. 99583400 |
| F | 9. 18989400  | -1. 55349200 | 0. 21373900  |
| F | 8. 03569300  | -0. 24925100 | 1. 52030500  |
| F | 8. 40040900  | 0. 33260600  | -0. 53854600 |
| S | 4. 27660500  | 1. 43519400  | -2. 37225200 |
| C | 1. 52148700  | 4. 09174400  | -3. 61599700 |
| H | 2. 56291600  | 3. 79388100  | -3. 78310700 |
| H | 1. 06545700  | 4. 23742500  | -4. 60488400 |
| H | 5. 77576000  | 0. 44659000  | -0. 26791500 |
| C | -0. 73336300 | -0. 18114100 | -3. 27451000 |
| H | 2. 49391100  | -0. 94285000 | -0. 29754900 |
| H | -1. 50848400 | 0. 40524200  | -3. 77892100 |
| O | 1. 56376900  | -2. 39377000 | 0. 51345900  |
| H | 1. 27981200  | 0. 80596100  | -0. 49819700 |
| O | -0. 73512200 | -3. 12435400 | -0. 23961400 |
| H | -1. 06593200 | 0. 16223600  | -2. 10684700 |
| C | -6. 88274600 | 0. 17120500  | 0. 68445300  |
| C | -6. 08459600 | 0. 41785200  | 1. 79587000  |
| C | -4. 77535000 | -0. 08171400 | 1. 86044000  |
| C | -5. 04415100 | -1. 07356800 | -0. 35372700 |
| C | -6. 36683800 | -0. 59379000 | -0. 35902900 |
| C | -1. 71409200 | 0. 99314700  | 2. 80118700  |
| C | -2. 72049100 | 0. 38663200  | 3. 55109200  |
| C | -2. 45317700 | 0. 00411300  | 4. 87522000  |
| C | -1. 25101800 | 0. 34842200  | 5. 48207800  |
| C | -0. 32278900 | 1. 09758400  | 4. 76127500  |
| C | -0. 51880100 | 1. 42695100  | 3. 40819900  |
| H | -6. 99132900 | -0. 82962000 | -1. 21534800 |
| H | 0. 59392300  | 1. 42637700  | 5. 24090500  |
| C | -4. 19704000 | 0. 15174200  | 3. 24978600  |
| C | -5. 03794000 | 1. 39863800  | 3. 69537900  |
| H | -5. 07562900 | 1. 50934200  | 4. 78313000  |
| H | -4. 56973900 | 2. 30122800  | 3. 28546300  |
| H | -3. 29681400 | -1. 68963700 | 5. 95660600  |
| H | -4. 16300600 | -0. 17694000 | 6. 19900300  |
| C | -4. 24726700 | -0. 75861400 | 0. 76264500  |
| H | -7. 89949500 | 0. 55222400  | 0. 63239200  |
| H | -1. 04252100 | 0. 06260300  | 6. 50984600  |

|   |             |             |             |
|---|-------------|-------------|-------------|
| C | -6.42273700 | 1.19444500  | 3.04835000  |
| H | -7.08992300 | 0.61659900  | 3.70333200  |
| H | -6.93450200 | 2.13972000  | 2.83438800  |
| C | -3.61807100 | -0.77115400 | 5.45242900  |
| C | -4.48708700 | -1.05119100 | 4.20644000  |
| H | -5.55252300 | -1.15910200 | 4.43231000  |
| H | -4.14911600 | -1.97361800 | 3.72081200  |
| C | 0.50224600  | 2.28972000  | 2.73595000  |
| C | 0.15649600  | 3.61315700  | 2.35423300  |
| C | 1.84687600  | 1.85067000  | 2.63317900  |
| C | -1.16846800 | 4.14503300  | 2.47968200  |
| C | 1.18156500  | 4.50156600  | 1.85166700  |
| C | 2.86678600  | 2.76469000  | 2.16803000  |
| C | -1.46516800 | 5.42934100  | 2.10234500  |
| H | -1.94849000 | 3.51837500  | 2.89530700  |
| C | 0.82798300  | 5.83183400  | 1.46171500  |
| C | 2.50568300  | 4.05794500  | 1.78206900  |
| C | -0.45756600 | 6.28612300  | 1.57594600  |
| H | -2.47935500 | 5.80340700  | 2.21509200  |
| H | 1.61279800  | 6.47868600  | 1.07813400  |
| H | 3.27544600  | 4.73988000  | 1.42689900  |
| H | -0.71214100 | 7.29982600  | 1.27920400  |
| C | -4.61807000 | -1.94182600 | -1.49580700 |
| C | -4.41192700 | -3.32877100 | -1.28761400 |
| C | -4.58264500 | -1.40520200 | -2.80700800 |
| C | -4.45030900 | -3.93885700 | 0.00701000  |
| C | -4.18612700 | -4.19295400 | -2.42498000 |
| C | -4.39376100 | -2.28799700 | -3.93627500 |
| C | -4.24907600 | -5.28405900 | 0.16875400  |
| H | -4.64223900 | -3.31963200 | 0.87514400  |
| C | -3.97754600 | -5.59154400 | -2.21178200 |
| C | -4.20224800 | -3.65417200 | -3.71429300 |
| C | -4.00253700 | -6.12536500 | -0.95275300 |
| H | -4.27623100 | -5.71714700 | 1.16493200  |
| H | -3.79950200 | -6.22230800 | -3.07945900 |
| H | -4.05753400 | -4.31537400 | -4.56645100 |
| H | -3.83949900 | -7.18899100 | -0.80278300 |
| C | 3.57274600  | 0.14277300  | 2.91248700  |
| H | 3.85011200  | -0.87554000 | 3.16945000  |
| C | 2.25663800  | 0.52079600  | 2.97503200  |
| H | 1.50417400  | -0.19854400 | 3.26923400  |
| C | 4.58013200  | 1.06080300  | 2.49733900  |
| H | 5.61757600  | 0.74109600  | 2.45692100  |
| C | 4.22942400  | 2.32985900  | 2.12227000  |



|   |             |             |             |
|---|-------------|-------------|-------------|
| H | 4.98248200  | 3.03655400  | 1.78217000  |
| C | -4.68373700 | 0.48322300  | -4.35666800 |
| H | -4.76300000 | 1.55324900  | -4.52576500 |
| C | -4.53934000 | -0.39668200 | -5.46779700 |
| H | -4.53600900 | 0.00555700  | -6.47746700 |
| C | -4.39232900 | -1.74156100 | -5.25821200 |
| H | -4.26536300 | -2.42366900 | -6.09583200 |
| C | -4.70557200 | -0.00273400 | -3.07439800 |
| H | -4.78701200 | 0.68421300  | -2.24025900 |
| C | -0.71272700 | 3.26343500  | -2.78154900 |
| C | -1.45154300 | 3.52679400  | -3.95259900 |
| C | -1.37721400 | 3.43489400  | -1.56089400 |
| C | -2.78028800 | 3.94147200  | -3.90660400 |
| H | -0.98301100 | 3.42382000  | -4.92790600 |
| C | -2.71104600 | 3.84974300  | -1.50808000 |
| H | -0.88376100 | 3.23939800  | -0.61789400 |
| C | -3.42054300 | 4.10930200  | -2.67642200 |
| H | -3.31088400 | 4.14308900  | -4.83381500 |
| H | -3.18418400 | 3.96356200  | -0.53728400 |
| H | -4.45534400 | 4.43858500  | -2.63404800 |
| C | 1.48652000  | 5.39356400  | -2.86229700 |
| C | 2.57585100  | 6.07821400  | -2.49845000 |
| H | 3.55873400  | 5.66642300  | -2.73507300 |
| H | 1.37104100  | -0.37755000 | -3.15635600 |
| H | 0.50102600  | 5.79890800  | -2.63098400 |
| C | -0.93385200 | -1.69824600 | -3.28354100 |
| H | -1.05582600 | -2.05193900 | -4.31326900 |
| H | -0.08095300 | -2.21628700 | -2.83546400 |
| H | -1.82115200 | -1.98303100 | -2.71947500 |
| C | 2.56872000  | 7.40622600  | -1.79702700 |
| H | 3.04746000  | 8.18134300  | -2.41109300 |
| H | 1.54971900  | 7.73663700  | -1.56905200 |
| H | 3.13490600  | 7.36456500  | -0.85637200 |

TS-1-2-4SR

1 imaginary frequency

H = -5315.334738

G = -5315.536995

E(M06-2X-DCM) = -5316.226482

|   |             |             |             |
|---|-------------|-------------|-------------|
| O | -0.81701600 | -0.25782900 | 1.88139200  |
| O | -2.37641600 | -1.78576300 | 0.44777400  |
| P | -1.03805800 | -0.86819600 | 0.38676000  |
| O | -1.24034600 | 0.40562000  | -0.43607100 |
| N | 0.21256400  | -1.80718100 | 0.06145100  |

|   |             |             |             |
|---|-------------|-------------|-------------|
| S | 0.28298600  | -2.91794100 | -1.10125200 |
| C | -0.05739500 | -4.51868000 | -0.18753300 |
| F | -0.13450100 | -5.51746900 | -1.07083300 |
| F | 0.93011200  | -4.78614800 | 0.67884400  |
| F | -1.20955400 | -4.44896900 | 0.49066100  |
| C | -1.28592500 | 4.19562200  | -0.84427500 |
| C | -1.44938100 | 3.63578100  | -2.32153900 |
| H | -2.50916800 | 3.43620600  | -2.50185600 |
| H | -1.13760600 | 4.43973400  | -3.00281100 |
| C | -0.64756200 | 2.45231900  | -2.74263900 |
| C | 0.17636300  | 4.04835000  | -0.36306900 |
| H | 0.24409400  | 4.36285000  | 0.68458800  |
| H | 0.83084500  | 4.69498800  | -0.94808700 |
| N | 0.73543200  | 2.70369100  | -0.48394100 |
| C | 1.98508900  | 2.45948100  | -1.00303700 |
| N | 2.43727200  | 1.18553700  | -0.79326800 |
| C | 3.70530100  | 0.66331700  | -1.17707700 |
| C | 4.88267800  | 1.36792800  | -0.91108800 |
| C | 3.76661400  | -0.60504500 | -1.75788100 |
| C | 6.11234600  | 0.80709700  | -1.24553900 |
| C | 5.00918700  | -1.15183600 | -2.09061400 |
| H | 2.86294000  | -1.18024600 | -1.93193100 |
| C | 6.18706300  | -0.45008300 | -1.84634800 |
| H | 7.14641200  | -0.87630100 | -2.11212600 |
| C | 5.07718000  | -2.54512900 | -2.66324700 |
| C | 7.36493300  | 1.53163800  | -0.83845100 |
| F | 4.05310400  | -2.79971200 | -3.49730800 |
| F | 5.04765600  | -3.48402500 | -1.68948600 |
| F | 6.22560800  | -2.73962500 | -3.35664000 |
| F | 7.27365400  | 2.86231500  | -1.03696200 |
| F | 8.45403700  | 1.08999100  | -1.49955600 |
| F | 7.61588000  | 1.35919500  | 0.49176400  |
| S | 2.81984700  | 3.60145200  | -1.92645600 |
| H | 4.83763200  | 2.33931000  | -0.43838300 |
| C | -1.14675700 | 1.18097200  | -3.00060400 |
| H | 1.81297600  | 0.50978600  | -0.35827200 |
| H | -2.23448800 | 1.10733400  | -3.08188300 |
| O | 1.66593200  | -3.05604500 | -1.56716900 |
| H | 0.30722400  | 1.97763000  | 0.08496000  |
| O | -0.79703500 | -2.81188300 | -2.09552100 |
| H | -1.08449900 | 0.81158300  | -1.76262500 |
| C | -6.07813300 | -0.15722400 | 1.55455500  |
| C | -5.11345800 | -0.44399600 | 2.51362500  |
| C | -3.91184600 | -1.07357100 | 2.15225500  |

|   |             |             |             |
|---|-------------|-------------|-------------|
| C | -4.60043000 | -1.03608300 | -0.19218800 |
| C | -5.83081300 | -0.49631600 | 0.22569700  |
| C | -0.59997300 | -1.11563300 | 2.97109500  |
| C | -1.68875900 | -1.76556900 | 3.55214800  |
| C | -1.45344200 | -2.74341400 | 4.53283200  |
| C | -0.16924600 | -2.97927100 | 5.00866100  |
| C | 0.88604600  | -2.22456500 | 4.50284400  |
| C | 0.70572200  | -1.28900100 | 3.46850800  |
| H | -6.59739800 | -0.32672200 | -0.52408800 |
| H | 1.88885900  | -2.36816700 | 4.89277400  |
| C | -3.19310800 | -1.54741900 | 3.41109800  |
| C | -3.70309300 | -0.47926600 | 4.43634600  |
| H | -3.61634100 | -0.81972200 | 5.47242900  |
| H | -3.09621400 | 0.42735500  | 4.33026800  |
| H | -2.63933500 | -4.51828100 | 4.97286400  |
| H | -3.07635100 | -3.10426600 | 5.92588400  |
| C | -3.63025300 | -1.27623200 | 0.80288000  |
| H | -7.02174200 | 0.30462300  | 1.83392000  |
| H | 0.01225200  | -3.73018700 | 5.77330400  |
| C | -5.15659900 | -0.18915900 | 4.00441600  |
| H | -5.86699300 | -0.86222200 | 4.50402500  |
| H | -5.47246500 | 0.83282900  | 4.24331200  |
| C | -2.74186300 | -3.42804400 | 4.93034400  |
| C | -3.71613800 | -2.96416100 | 3.82901700  |
| H | -4.76230000 | -2.94615600 | 4.14882300  |
| H | -3.64140600 | -3.63299900 | 2.96381600  |
| C | 1.90280800  | -0.51177200 | 3.01892000  |
| C | 1.99109200  | 0.87763900  | 3.28871200  |
| C | 3.01499200  | -1.20193800 | 2.47317000  |
| C | 0.92020700  | 1.63318400  | 3.86816500  |
| C | 3.22557400  | 1.58014800  | 3.01144700  |
| C | 4.25667100  | -0.49686100 | 2.25198200  |
| C | 1.04187800  | 2.97746800  | 4.11288700  |
| H | 0.00029000  | 1.12350800  | 4.13086200  |
| C | 3.30607900  | 2.98468300  | 3.27166500  |
| C | 4.32779700  | 0.87232200  | 2.52353600  |
| C | 2.24639600  | 3.67063000  | 3.80050500  |
| H | 0.21588600  | 3.51972200  | 4.56611100  |
| H | 4.23923600  | 3.49501200  | 3.04520300  |
| H | 5.26196200  | 1.39848400  | 2.33850800  |
| H | 2.32355800  | 4.73612800  | 3.99892600  |
| C | -4.40101000 | -1.36223800 | -1.63716900 |
| C | -4.16449200 | -2.70198700 | -2.03934700 |
| C | -4.54058800 | -0.34247200 | -2.61555600 |

|   |             |             |             |
|---|-------------|-------------|-------------|
| C | -4.10547400 | -3.79500100 | -1.11760400 |
| C | -4.00648700 | -3.01003200 | -3.44238900 |
| C | -4.41789900 | -0.67613300 | -4.01803500 |
| C | -3.86204000 | -5.07484400 | -1.54031800 |
| H | -4.26339900 | -3.60450000 | -0.06307900 |
| C | -3.74432400 | -4.35723600 | -3.84218900 |
| C | -4.13719900 | -1.99313200 | -4.39009800 |
| C | -3.66607800 | -5.36357000 | -2.91991500 |
| H | -3.81641100 | -5.88168300 | -0.81415200 |
| H | -3.61122400 | -4.56182900 | -4.90159800 |
| H | -4.03118700 | -2.23499100 | -5.44558100 |
| H | -3.46297400 | -6.38356600 | -3.23371500 |
| C | 4.05918100  | -3.22677500 | 1.59462000  |
| H | 3.97892400  | -4.26614500 | 1.29064300  |
| C | 2.96276200  | -2.58522500 | 2.10731100  |
| H | 2.02512400  | -3.11676300 | 2.20052700  |
| C | 5.29397800  | -2.53889500 | 1.42573100  |
| H | 6.14939600  | -3.06722700 | 1.01531800  |
| C | 5.38694700  | -1.21105000 | 1.74308600  |
| H | 6.31121200  | -0.66240800 | 1.58560800  |
| C | -4.97154800 | 1.98091400  | -3.26736100 |
| H | -5.19069900 | 3.00828900  | -2.98596300 |
| C | -4.87087400 | 1.63894700  | -4.64610500 |
| H | -5.01171800 | 2.40320200  | -5.40539000 |
| C | -4.58944200 | 0.34764600  | -5.00281700 |
| H | -4.49809100 | 0.06999600  | -6.05028100 |
| C | -4.79803100 | 1.03123000  | -2.29103800 |
| H | -4.85762800 | 1.32139700  | -1.24879300 |
| C | -1.68884700 | 5.68592200  | -0.86388500 |
| C | -0.87906200 | 6.70735800  | -0.34716400 |
| C | -2.92901300 | 6.06033500  | -1.41079000 |
| C | -1.28792800 | 8.04344700  | -0.37998300 |
| H | 0.08593400  | 6.48176500  | 0.09110800  |
| C | -3.33926800 | 7.39143700  | -1.44856600 |
| H | -3.59300100 | 5.30318300  | -1.81905000 |
| C | -2.51776500 | 8.39424800  | -0.93104300 |
| H | -0.63387500 | 8.80920200  | 0.02851800  |
| H | -4.30274800 | 7.64379700  | -1.88381500 |
| H | -2.83350800 | 9.43346900  | -0.95844500 |
| C | -2.28406100 | 3.42059800  | 0.08551900  |
| H | -3.29864700 | 3.62487800  | -0.27499800 |
| H | -2.12033500 | 2.34534000  | -0.03517100 |
| C | -2.19967000 | 3.77102100  | 1.54869000  |
| C | -3.08381300 | 4.53411700  | 2.19865000  |

|   |             |             |             |
|---|-------------|-------------|-------------|
| H | -3.92381400 | 4.95321300  | 1.64175500  |
| H | 0.41151000  | 2.63473100  | -2.92325300 |
| H | -1.36354200 | 3.34695700  | 2.10751500  |
| C | -0.34812000 | 0.16139800  | -3.80156100 |
| H | 0.72950400  | 0.30938000  | -3.67415500 |
| H | -0.59494700 | -0.85941500 | -3.49931700 |
| H | -0.57967100 | 0.26397900  | -4.86833200 |
| C | -3.02648300 | 4.87900700  | 3.65885100  |
| H | -2.96214000 | 5.96550700  | 3.80689700  |
| H | -3.93171900 | 4.54551300  | 4.18450500  |
| H | -2.16160800 | 4.41852000  | 4.14856700  |

INT-14

0 imaginary frequency

H = -5315.384735

G = -5315.587008

E(M06-2X-DCM) = -5316.273549

|   |             |             |             |
|---|-------------|-------------|-------------|
| C | -1.13834200 | 4.66587800  | -0.13786000 |
| C | -1.86855400 | 4.24253100  | 1.19298100  |
| H | -1.89003600 | 3.14802900  | 1.21461700  |
| H | -1.25367900 | 4.54566000  | 2.04435900  |
| C | -3.27755500 | 4.76967400  | 1.43132400  |
| C | -1.81938000 | 3.95454200  | -1.33316500 |
| H | -1.35625600 | 4.26352000  | -2.27640100 |
| H | -2.86252300 | 4.26943600  | -1.38518300 |
| N | -1.81706600 | 2.50024400  | -1.21100600 |
| C | -2.77837000 | 1.68122100  | -1.70995800 |
| N | -2.50634900 | 0.35077500  | -1.44625000 |
| C | -3.31160600 | -0.79011400 | -1.52390600 |
| C | -4.71319800 | -0.77688000 | -1.62263900 |
| C | -2.65717600 | -2.03030200 | -1.42209800 |
| C | -5.41948800 | -1.97833100 | -1.62818000 |
| C | -3.38360000 | -3.21843800 | -1.42770100 |
| H | -1.57720500 | -2.06029600 | -1.32060500 |
| C | -4.77333700 | -3.21058800 | -1.53877600 |
| H | -5.33561100 | -4.13600800 | -1.55421600 |
| C | -2.66663300 | -4.52000700 | -1.21376200 |
| C | -6.92521700 | -1.93859000 | -1.62421700 |
| F | -3.33349800 | -5.56924800 | -1.73482500 |
| F | -2.50226200 | -4.78567600 | 0.11414000  |
| F | -1.42499200 | -4.51833100 | -1.75505000 |
| F | -7.41400000 | -0.86526100 | -2.27319400 |
| F | -7.40898100 | -1.88490900 | -0.35387800 |
| F | -7.46041100 | -3.04186300 | -2.19294400 |

|   |             |             |             |
|---|-------------|-------------|-------------|
| S | -4.11158700 | 2.24964600  | -2.57420400 |
| H | -5.23688000 | 0.16479900  | -1.69758600 |
| C | -4.36367900 | 4.15026100  | 0.95267700  |
| H | -1.56163800 | 0.16653100  | -1.10747700 |
| H | -0.98477800 | 2.06453300  | -0.82255100 |
| H | 1.74718500  | 1.57905800  | 1.35223300  |
| O | 0.24383100  | -1.47629100 | 1.13649600  |
| O | 2.44597400  | -1.27802100 | -0.19336400 |
| P | 1.19131200  | -0.43551200 | 0.35865900  |
| O | 0.35328000  | 0.34300500  | -0.58599400 |
| C | 1.65645000  | -3.36262200 | 4.59046000  |
| C | 2.06621000  | -3.80463700 | 3.33764900  |
| C | 1.50435100  | -3.26581600 | 2.16874500  |
| C | 0.17643700  | -1.72819000 | 3.53676300  |
| C | 0.68383200  | -2.36509600 | 4.67984700  |
| C | 2.25582700  | -2.39302400 | -1.04194200 |
| C | 1.96120200  | -3.63181800 | -0.47846400 |
| C | 1.68776300  | -4.70568200 | -1.34426100 |
| C | 1.78982100  | -4.56019600 | -2.72281400 |
| C | 2.15948200  | -3.32510500 | -3.25294900 |
| C | 2.38665500  | -2.21050800 | -2.43133900 |
| H | 0.32598900  | -2.04160300 | 5.65269000  |
| H | 2.25677200  | -3.20016400 | -4.32727700 |
| C | 1.92270700  | -4.11510100 | 0.97120500  |
| C | 3.31907400  | -4.61223900 | 1.47072300  |
| H | 3.65706900  | -5.50886900 | 0.94197200  |
| H | 4.05707500  | -3.81944600 | 1.30320000  |
| H | 0.39584200  | -6.42156500 | -1.01503800 |
| H | 2.07098100  | -6.67110100 | -0.51965100 |
| C | 0.65222600  | -2.17606900 | 2.29067000  |
| H | 2.08184000  | -3.78940100 | 5.49506100  |
| H | 1.57693500  | -5.39626900 | -3.38358200 |
| C | 3.12353200  | -4.83108300 | 2.98923300  |
| H | 2.78478900  | -5.85284600 | 3.20841500  |
| H | 4.04776200  | -4.67647200 | 3.55681900  |
| C | 1.26288000  | -5.92786600 | -0.56490900 |
| C | 0.95189900  | -5.33914600 | 0.82449200  |
| H | 1.06826600  | -6.05910700 | 1.63942800  |
| H | -0.08141500 | -4.97951300 | 0.84059200  |
| C | 2.77637100  | -0.90494500 | -3.05501700 |
| C | 4.13628500  | -0.51289000 | -3.05164500 |
| C | 1.80266700  | -0.11054500 | -3.70500300 |
| C | 5.17304800  | -1.31380700 | -2.47397400 |
| C | 4.52031200  | 0.73221900  | -3.67681700 |

|   |              |              |              |
|---|--------------|--------------|--------------|
| C | 2. 19994900  | 1. 13387100  | -4. 32558500 |
| C | 6. 48234200  | -0. 90851600 | -2. 49348300 |
| H | 4. 90970600  | -2. 26217100 | -2. 01862000 |
| C | 5. 89602600  | 1. 12264300  | -3. 66687500 |
| C | 3. 54240000  | 1. 52278500  | -4. 28884700 |
| C | 6. 85229300  | 0. 32966500  | -3. 09180700 |
| H | 7. 24946400  | -1. 53880000 | -2. 05160000 |
| H | 6. 16641400  | 2. 06538300  | -4. 13675200 |
| H | 3. 83619300  | 2. 45794900  | -4. 76184700 |
| H | 7. 89490000  | 0. 63541000  | -3. 09589100 |
| C | -0. 84978000 | -0. 64456700 | 3. 64777300  |
| C | -2. 16409300 | -0. 87831500 | 3. 16832400  |
| C | -0. 52123500 | 0. 59319900  | 4. 25381300  |
| C | -2. 57669000 | -2. 12462200 | 2. 59742600  |
| C | -3. 15405300 | 0. 17084900  | 3. 25977900  |
| C | -1. 53011400 | 1. 62478500  | 4. 35806200  |
| C | -3. 85021000 | -2. 30785700 | 2. 12556200  |
| H | -1. 86635500 | -2. 94153400 | 2. 54044100  |
| C | -4. 46819400 | -0. 05692500 | 2. 74272900  |
| C | -2. 81064400 | 1. 39065700  | 3. 84993300  |
| C | -4. 81069100 | -1. 25850900 | 2. 18373700  |
| H | -4. 12416400 | -3. 26293600 | 1. 68868000  |
| H | -5. 18936800 | 0. 75463300  | 2. 80061000  |
| H | -3. 55746900 | 2. 17957900  | 3. 90683800  |
| H | -5. 80238100 | -1. 41512600 | 1. 76988900  |
| C | -0. 49698100 | 0. 31777000  | -4. 41397400 |
| H | -1. 54030400 | 0. 01938000  | -4. 45372700 |
| C | 0. 42096100  | -0. 48003200 | -3. 78263000 |
| H | 0. 10342000  | -1. 41431900 | -3. 33299900 |
| C | -0. 10244900 | 1. 54986700  | -5. 01064600 |
| H | -0. 84876600 | 2. 17086500  | -5. 49739800 |
| C | 1. 20858500  | 1. 94163100  | -4. 96756800 |
| H | 1. 52437400  | 2. 87570400  | -5. 42633900 |
| C | 1. 07114200  | 2. 10635800  | 5. 33010400  |
| H | 2. 07654500  | 2. 30585400  | 5. 68909700  |
| C | 0. 06866700  | 3. 11072000  | 5. 44664100  |
| H | 0. 31100200  | 4. 06262500  | 5. 91143800  |
| C | -1. 19289500 | 2. 87252800  | 4. 97142000  |
| H | -1. 96991700 | 3. 62925900  | 5. 05303000  |
| C | 0. 78610200  | 0. 89368900  | 4. 75789500  |
| H | 1. 56445600  | 0. 14371400  | 4. 67894600  |
| N | 2. 02980000  | 0. 59942600  | 1. 40981800  |
| S | 3. 48904400  | 0. 42972300  | 2. 24748700  |
| C | 4. 83874500  | 0. 36851100  | 0. 91411700  |

|   |             |             |             |
|---|-------------|-------------|-------------|
| O | 3.53482700  | -0.86479600 | 2.90869200  |
| O | 3.67783800  | 1.69350300  | 2.94647700  |
| F | 5.90779600  | 0.98656000  | 1.41445600  |
| F | 5.14397400  | -0.89484600 | 0.64326600  |
| F | 4.43763800  | 0.99549700  | -0.18872000 |
| C | 0.36478800  | 4.33023300  | -0.03002900 |
| C | 1.09990200  | 4.70192900  | 1.11203900  |
| C | 1.07817500  | 3.72170700  | -1.07670100 |
| C | 2.47323700  | 4.47866300  | 1.20652100  |
| H | 0.60459000  | 5.19193800  | 1.94397000  |
| C | 2.45560200  | 3.49787800  | -0.98945700 |
| H | 0.57262900  | 3.41352400  | -1.98501000 |
| C | 3.16197400  | 3.87680200  | 0.15091800  |
| H | 3.00454100  | 4.77254500  | 2.10719000  |
| H | 2.96784300  | 3.01684900  | -1.81764100 |
| H | 4.23057600  | 3.69847500  | 0.22355000  |
| C | -1.31339600 | 6.21344500  | -0.35472100 |
| H | -2.39127200 | 6.40496900  | -0.38416100 |
| H | -0.92494700 | 6.71551700  | 0.54104400  |
| C | -0.67822400 | 6.84760300  | -1.58335200 |
| C | -1.38720200 | 7.03620700  | -2.70332200 |
| H | -2.42612700 | 6.72649100  | -2.78712300 |
| H | -4.30457500 | 3.25415100  | 0.34233100  |
| H | -5.36312800 | 4.53322800  | 1.14690100  |
| H | -0.95251200 | 7.51063600  | -3.57999400 |
| C | -3.40699500 | 5.99042700  | 2.31582200  |
| H | -2.98455900 | 5.79413000  | 3.31180700  |
| H | -2.86191400 | 6.85336100  | 1.91427900  |
| H | -4.45358700 | 6.28343300  | 2.44566400  |
| C | 0.74755200  | 7.33528900  | -1.47054600 |
| H | 1.44732400  | 6.52020400  | -1.25827800 |
| H | 1.06995500  | 7.83204700  | -2.39121500 |
| H | 0.84490700  | 8.05494000  | -0.64564900 |

INT-14-1

0 imaginary frequency

H = -5315.381744

G = -5315.583374

E(M06-2X-DCM) = -5316.270080

|   |             |            |            |
|---|-------------|------------|------------|
| C | 0.20039200  | 5.15530600 | 1.22063200 |
| C | -0.77445700 | 5.04192300 | 2.44650700 |
| H | -0.24728200 | 5.41808300 | 3.33079300 |
| H | -1.58405700 | 5.75870600 | 2.26309600 |
| C | -1.40294700 | 3.69113000 | 2.77927800 |



|   |             |             |             |
|---|-------------|-------------|-------------|
| C | -0.54101300 | 4.80756500  | -0.09050700 |
| H | 0.11310400  | 5.00283300  | -0.94913400 |
| H | -1.40662200 | 5.46534500  | -0.19758700 |
| N | -1.03710100 | 3.43897500  | -0.16190600 |
| C | -2.12576200 | 3.04500100  | -0.86393200 |
| N | -2.26313500 | 1.66990700  | -0.87226100 |
| C | -3.34097000 | 0.88758500  | -1.30548300 |
| C | -4.68210000 | 1.28601500  | -1.18466900 |
| C | -3.05498900 | -0.38957400 | -1.80930700 |
| C | -5.69910300 | 0.42329000  | -1.58582600 |
| C | -4.08770200 | -1.23967400 | -2.20409800 |
| H | -2.02322200 | -0.71498600 | -1.88870400 |
| C | -5.41916200 | -0.84078500 | -2.10822800 |
| H | -6.21962600 | -1.49571400 | -2.43051500 |
| C | -3.76353900 | -2.63144800 | -2.66510400 |
| C | -7.13555600 | 0.81430700  | -1.35934200 |
| F | -2.57286800 | -2.69667200 | -3.30661700 |
| F | -4.69977400 | -3.13083900 | -3.49632700 |
| F | -3.67695700 | -3.49913200 | -1.61486400 |
| F | -7.30940200 | 2.14879900  | -1.33372100 |
| F | -7.59210100 | 0.33385200  | -0.17108200 |
| F | -7.94958900 | 0.31074700  | -2.31362100 |
| S | -3.16212300 | 4.12068600  | -1.65400900 |
| H | -4.92098300 | 2.26018200  | -0.78311100 |
| C | -0.71353900 | 2.66736200  | 3.29964000  |
| H | -1.41572600 | 1.14121800  | -0.65738600 |
| H | -1.20531000 | 1.73134300  | 3.54889000  |
| H | -0.49091800 | 2.72214200  | 0.30305900  |
| H | 1.94543300  | 0.40570200  | 1.80200700  |
| O | -0.22250600 | -1.92006300 | 0.52770800  |
| O | 1.99835900  | -1.64891900 | -0.77653800 |
| P | 0.94798200  | -0.87825200 | 0.17096700  |
| O | 0.34016900  | 0.38637600  | -0.30626400 |
| C | 0.58625000  | -5.53350500 | 2.48556100  |
| C | 0.90502800  | -5.38080500 | 1.14135800  |
| C | 0.52910100  | -4.22261900 | 0.44136800  |
| C | -0.41308900 | -3.30084500 | 2.50529600  |
| C | -0.11080100 | -4.51811300 | 3.13832800  |
| C | 1.58020100  | -2.13588600 | -2.03710500 |
| C | 0.94013600  | -3.36939300 | -2.10106900 |
| C | 0.42646700  | -3.79293400 | -3.33893000 |
| C | 0.63179700  | -3.04309300 | -4.49120800 |
| C | 1.35264200  | -1.85258400 | -4.40980500 |
| C | 1.83046000  | -1.36063900 | -3.18469800 |

|   |             |             |             |
|---|-------------|-------------|-------------|
| H | -0.40815400 | -4.64502500 | 4.17466300  |
| H | 1.53773100  | -1.26655500 | -5.30504300 |
| C | 0.73052400  | -4.45955100 | -1.05446200 |
| C | 1.93277100  | -5.45931500 | -1.01127200 |
| H | 2.02727400  | -6.03785100 | -1.93534600 |
| H | 2.85961000  | -4.89113100 | -0.87069600 |
| H | -1.29726900 | -5.06001900 | -3.72093000 |
| H | 0.22741200  | -5.93637000 | -3.57917300 |
| C | -0.02411500 | -3.16645000 | 1.15913400  |
| H | 0.86263700  | -6.43722100 | 3.02248800  |
| H | 0.23460000  | -3.37630400 | -5.44630900 |
| C | 1.65880700  | -6.33014000 | 0.23497900  |
| H | 1.05581400  | -7.21354500 | -0.01559500 |
| H | 2.57957700  | -6.69923500 | 0.70032000  |
| C | -0.34313600 | -5.08403300 | -3.18497800 |
| C | -0.52699200 | -5.17855300 | -1.65722700 |
| H | -0.63115100 | -6.20461800 | -1.29332600 |
| H | -1.42690700 | -4.62781900 | -1.36729800 |
| C | 2.59308800  | -0.07220600 | -3.16057400 |
| C | 4.00161600  | -0.09875600 | -3.01768700 |
| C | 1.91682200  | 1.15393500  | -3.36626500 |
| C | 4.74740100  | -1.31454800 | -2.89387900 |
| C | 4.74214500  | 1.14251900  | -3.02847800 |
| C | 2.67216300  | 2.38715300  | -3.38791500 |
| C | 6.11195600  | -1.30509300 | -2.76351700 |
| H | 4.21564400  | -2.25950200 | -2.91180500 |
| C | 6.16367700  | 1.10906700  | -2.87559300 |
| C | 4.05741900  | 2.34875100  | -3.20576700 |
| C | 6.83338800  | -0.07762200 | -2.74482000 |
| H | 6.65233100  | -2.24396100 | -2.67656700 |
| H | 6.70288400  | 2.05340700  | -2.87618600 |
| H | 4.61915700  | 3.28058700  | -3.21697700 |
| H | 7.91440500  | -0.08973300 | -2.63627600 |
| C | -1.15565100 | -2.24364400 | 3.26129400  |
| C | -2.47174300 | -1.88867600 | 2.86728600  |
| C | -0.57999800 | -1.66945700 | 4.42354300  |
| C | -3.13290700 | -2.46262500 | 1.73468800  |
| C | -3.21294900 | -0.92152100 | 3.64620500  |
| C | -1.34600900 | -0.72573400 | 5.20722900  |
| C | -4.39912500 | -2.08110100 | 1.37549400  |
| H | -2.62218400 | -3.21722300 | 1.14809400  |
| C | -4.52826600 | -0.54224900 | 3.22976800  |
| C | -2.63547800 | -0.37726000 | 4.79669600  |
| C | -5.10628200 | -1.09483500 | 2.11908300  |

|   |             |             |             |
|---|-------------|-------------|-------------|
| H | -4.86394800 | -2.53314200 | 0.50588500  |
| H | -5.05911700 | 0.20034700  | 3.82096600  |
| H | -3.20388600 | 0.33880000  | 5.38692000  |
| H | -6.09358700 | -0.78219500 | 1.79208900  |
| C | -0.12120400 | 2.44376700  | -3.76668000 |
| H | -1.19782200 | 2.48683800  | -3.90100100 |
| C | 0.49964000  | 1.24015400  | -3.55840400 |
| H | -0.08718100 | 0.32891300  | -3.53943400 |
| C | 0.62873200  | 3.65521500  | -3.78662200 |
| H | 0.11321000  | 4.59767400  | -3.94653400 |
| C | 1.98454200  | 3.62433600  | -3.59888000 |
| H | 2.56836600  | 4.54159600  | -3.60816700 |
| C | 1.27437700  | -1.39064100 | 5.99391200  |
| H | 2.29210800  | -1.62569400 | 6.29199100  |
| C | 0.50738100  | -0.47769100 | 6.77100500  |
| H | 0.93905400  | -0.03416100 | 7.66404200  |
| C | -0.76484700 | -0.15568500 | 6.38318000  |
| H | -1.36035300 | 0.54822700  | 6.95966700  |
| C | 0.75046300  | -1.96658900 | 4.86546000  |
| H | 1.35630400  | -2.65317000 | 4.28683400  |
| N | 1.96507200  | -0.56897400 | 1.49767800  |
| S | 3.26760600  | -1.40279600 | 2.17207000  |
| C | 4.67990500  | -1.26384700 | 0.92062500  |
| O | 2.95916100  | -2.82242400 | 2.24526700  |
| O | 3.68160800  | -0.60338000 | 3.31668000  |
| F | 4.63939800  | -2.28380100 | 0.07288200  |
| F | 4.60383200  | -0.10866100 | 0.26037300  |
| F | 5.81775700  | -1.30567300 | 1.61240000  |
| H | 0.34909700  | 2.72786800  | 3.51231400  |
| C | -2.89725700 | 3.60169200  | 2.57438600  |
| H | -3.18881500 | 3.90391400  | 1.56147500  |
| H | -3.27129400 | 2.58911900  | 2.75508900  |
| H | -3.41712500 | 4.28329400  | 3.26343700  |
| C | 1.48242300  | 4.32815800  | 1.42774200  |
| C | 2.02150200  | 3.50540200  | 0.42932900  |
| C | 2.19511900  | 4.41746400  | 2.63857700  |
| C | 3.19621500  | 2.77493100  | 0.64054200  |
| H | 1.53986100  | 3.41697200  | -0.53740700 |
| C | 3.36457300  | 3.69231800  | 2.85663200  |
| H | 1.82963600  | 5.05774400  | 3.43630600  |
| C | 3.86968900  | 2.85465300  | 1.85805500  |
| H | 3.58199700  | 2.15553600  | -0.16262100 |
| H | 3.88015700  | 3.77811200  | 3.80945100  |
| H | 4.77591500  | 2.27995100  | 2.02661100  |

|   |             |            |             |
|---|-------------|------------|-------------|
| C | 0.58951700  | 6.68318700 | 1.13922900  |
| H | 1.14668200  | 6.92019300 | 2.05200100  |
| H | -0.34364000 | 7.25916700 | 1.18968100  |
| C | 1.38626800  | 7.15079600 | -0.07088500 |
| C | 2.71423400  | 7.00405400 | -0.14299900 |
| H | 3.28751500  | 6.53409700 | 0.65079800  |
| H | 3.27637600  | 7.35326300 | -1.00614600 |
| C | 0.61217900  | 7.85333400 | -1.16315600 |
| H | 0.13456100  | 8.76336100 | -0.77382500 |
| H | 1.26323300  | 8.14472100 | -1.99348500 |
| H | -0.19572300 | 7.22987500 | -1.56608100 |

INT-14-2

0 imaginary frequency

H = -5315.381081

G = -5315.582548

E(M06-2X-DCM) = -5316.267415

|   |             |             |             |
|---|-------------|-------------|-------------|
| C | -2.85371600 | 4.26385800  | 0.36108500  |
| C | -4.20594300 | 3.84098500  | 1.00271400  |
| H | -4.43896800 | 4.55002900  | 1.81365500  |
| H | -4.96857800 | 4.03994600  | 0.23990000  |
| C | -4.49719000 | 2.44807800  | 1.54654800  |
| C | -2.66309600 | 3.56192400  | -1.01515200 |
| H | -1.87029200 | 4.06510500  | -1.58145100 |
| H | -3.57980300 | 3.66437300  | -1.59565400 |
| N | -2.34601500 | 2.14697400  | -0.96044500 |
| C | -3.10752600 | 1.13981000  | -1.45106900 |
| N | -2.49360800 | -0.08623400 | -1.28091400 |
| C | -2.96192900 | -1.38157800 | -1.53303800 |
| C | -4.31168600 | -1.75988900 | -1.44341400 |
| C | -2.00123900 | -2.36371800 | -1.81716200 |
| C | -4.67319900 | -3.08726600 | -1.66210400 |
| C | -2.38288800 | -3.68803300 | -2.02742700 |
| H | -0.95285500 | -2.08884600 | -1.87286800 |
| C | -3.72285800 | -4.06421300 | -1.96493600 |
| H | -4.02102700 | -5.08970500 | -2.14659100 |
| C | -1.32610600 | -4.73188700 | -2.24565500 |
| C | -6.10746900 | -3.50588600 | -1.47321800 |
| F | -1.78630900 | -5.79974000 | -2.92651500 |
| F | -0.84026900 | -5.20640600 | -1.06194100 |
| F | -0.25739300 | -4.24657200 | -2.92301200 |
| F | -6.31920400 | -3.97942300 | -0.21503300 |
| F | -6.45447000 | -4.50211000 | -2.31872600 |
| F | -6.97115100 | -2.49077600 | -1.65890200 |

|   |             |             |             |
|---|-------------|-------------|-------------|
| S | -4.59393100 | 1.36741800  | -2.21984400 |
| H | -5.06212600 | -1.01910300 | -1.20928400 |
| C | -3.61090900 | 1.51412500  | 1.90378000  |
| H | -1.51859300 | -0.04626800 | -0.98373300 |
| H | -3.94282100 | 0.55775900  | 2.29881500  |
| H | -1.44044500 | 1.89952800  | -0.57241800 |
| H | 1.37775200  | 1.60962000  | 1.83728900  |
| O | 0.96953700  | -1.55380800 | 0.72431200  |
| O | 2.80620400  | -0.24739200 | -0.55334200 |
| P | 1.42690300  | -0.08280400 | 0.26117500  |
| O | 0.27897500  | 0.58801600  | -0.39623800 |
| C | 3.43578600  | -3.79232400 | 3.26245300  |
| C | 3.74018000  | -3.68075600 | 1.91067000  |
| C | 2.85923700  | -3.03382100 | 1.02930800  |
| C | 1.38448600  | -2.50673200 | 2.91158000  |
| C | 2.24356900  | -3.24799400 | 3.73957700  |
| C | 2.83468000  | -1.03700300 | -1.72833000 |
| C | 2.97218100  | -2.41709600 | -1.60656600 |
| C | 2.88012500  | -3.20291500 | -2.76859300 |
| C | 2.74348500  | -2.61351800 | -4.02023000 |
| C | 2.69687400  | -1.22361800 | -4.11754000 |
| C | 2.72704600  | -0.40130700 | -2.97977100 |
| H | 1.97343500  | -3.36723000 | 4.78438700  |
| H | 2.61374300  | -0.74911900 | -5.09072700 |
| C | 3.29677500  | -3.30508400 | -0.40766900 |
| C | 4.83942800  | -3.45820300 | -0.19686600 |
| H | 5.31996300  | -4.00268900 | -1.01556400 |
| H | 5.28942600  | -2.46028800 | -0.14252500 |
| H | 2.17341300  | -5.24952400 | -2.96454200 |
| H | 3.90969500  | -5.10529400 | -2.68455400 |
| C | 1.75479300  | -2.37695700 | 1.56003500  |
| H | 4.11057100  | -4.30543100 | 3.94272200  |
| H | 2.67436700  | -3.22585000 | -4.91538200 |
| C | 4.96951900  | -4.16443300 | 1.17168300  |
| H | 4.97071300  | -5.25755300 | 1.06225900  |
| H | 5.89512100  | -3.89896900 | 1.69436800  |
| C | 2.93266200  | -4.67376100 | -2.42639900 |
| C | 2.69737800  | -4.66729300 | -0.90313600 |
| H | 3.14184600  | -5.52480900 | -0.38999900 |
| H | 1.62158500  | -4.68004300 | -0.70341300 |
| C | 2.67979800  | 1.08630300  | -3.15224800 |
| C | 3.87319000  | 1.83831000  | -3.02617500 |
| C | 1.47306900  | 1.71921000  | -3.53409500 |
| C | 5.14376100  | 1.23890100  | -2.75113200 |

|   |              |              |              |
|---|--------------|--------------|--------------|
| C | 3. 83709500  | 3. 27023500  | -3. 21892000 |
| C | 1. 45617500  | 3. 15050400  | -3. 74262300 |
| C | 6. 28251000  | 1. 99481600  | -2. 64623000 |
| H | 5. 20021500  | 0. 16249800  | -2. 63131700 |
| C | 5. 04424500  | 4. 02427800  | -3. 08214300 |
| C | 2. 62996900  | 3. 88624500  | -3. 56076900 |
| C | 6. 23492500  | 3. 40912700  | -2. 80295200 |
| H | 7. 23422300  | 1. 51151000  | -2. 44220400 |
| H | 4. 99536000  | 5. 10194400  | -3. 21938800 |
| H | 2. 60931700  | 4. 96360600  | -3. 71309400 |
| H | 7. 14685200  | 3. 99248100  | -2. 71020800 |
| C | 0. 11921800  | -1. 93363600 | 3. 46946800  |
| C | -1. 13119100 | -2. 44494600 | 3. 03674600  |
| C | 0. 17235400  | -0. 94149900 | 4. 48072200  |
| C | -1. 25588600 | -3. 48347500 | 2. 05940200  |
| C | -2. 35161400 | -1. 92687600 | 3. 61338600  |
| C | -1. 05753800 | -0. 44383600 | 5. 05652600  |
| C | -2. 48220800 | -3. 94496700 | 1. 65813100  |
| H | -0. 36053400 | -3. 91727400 | 1. 62943400  |
| C | -3. 61157100 | -2. 43024400 | 3. 15961400  |
| C | -2. 28069800 | -0. 94512900 | 4. 60537500  |
| C | -3. 68184900 | -3. 40467500 | 2. 20112500  |
| H | -2. 53672600 | -4. 72754900 | 0. 90874200  |
| H | -4. 51696200 | -2. 01583100 | 3. 59705900  |
| H | -3. 20237600 | -0. 56150000 | 5. 03798300  |
| H | -4. 64212300 | -3. 76097500 | 1. 84068800  |
| C | -0. 89415500 | 1. 64510900  | -4. 14138000 |
| H | -1. 81144200 | 1. 08294600  | -4. 28899200 |
| C | 0. 24914600  | 1. 00419300  | -3. 74187700 |
| H | 0. 23686300  | -0. 06818800 | -3. 58345000 |
| C | -0. 90316200 | 3. 05473100  | -4. 34854900 |
| H | -1. 82195200 | 3. 54116200  | -4. 66328500 |
| C | 0. 23827600  | 3. 78321400  | -4. 14751300 |
| H | 0. 24676500  | 4. 85925500  | -4. 30601000 |
| C | 1. 41309800  | 0. 57793300  | 5. 94205400  |
| H | 2. 36144400  | 0. 98934500  | 6. 27515300  |
| C | 0. 19924200  | 1. 05292600  | 6. 51425400  |
| H | 0. 23021500  | 1. 80990600  | 7. 29334200  |
| C | -0. 99907600 | 0. 55549100  | 6. 07796600  |
| H | -1. 93577600 | 0. 91046700  | 6. 50135300  |
| C | 1. 39988700  | -0. 38287900 | 4. 96427600  |
| H | 2. 33642800  | -0. 72688100 | 4. 54172800  |
| N | 1. 99700000  | 0. 83997100  | 1. 56525400  |
| S | 3. 51990300  | 0. 98651900  | 2. 27652900  |

|   |             |             |             |
|---|-------------|-------------|-------------|
| C | 4.58986100  | 1.86947200  | 0.98663500  |
| O | 4.11631300  | -0.32717600 | 2.45795000  |
| O | 3.34907900  | 1.94747500  | 3.35867800  |
| F | 5.44152000  | 2.65019100  | 1.64789600  |
| F | 5.26445900  | 0.97509000  | 0.27820800  |
| F | 3.82706300  | 2.61803500  | 0.18793300  |
| H | -2.54051600 | 1.64003500  | 1.80353600  |
| C | -5.98076700 | 2.19676800  | 1.70535300  |
| H | -6.46196400 | 2.99085000  | 2.29442300  |
| H | -6.47519400 | 2.18188300  | 0.72526900  |
| H | -6.17757400 | 1.24094900  | 2.20038900  |
| C | -1.62936600 | 4.10209400  | 1.28140400  |
| C | -0.32722300 | 4.07863200  | 0.75554600  |
| C | -1.75730900 | 4.08327000  | 2.68091100  |
| C | 0.79558500  | 4.02574500  | 1.58776400  |
| H | -0.16730600 | 4.10976700  | -0.31816200 |
| C | -0.64236600 | 4.01654400  | 3.51541500  |
| H | -2.74361800 | 4.08904000  | 3.13117100  |
| C | 0.64521400  | 3.98714200  | 2.97580200  |
| H | 1.78784300  | 4.02326100  | 1.14360600  |
| H | -0.78053900 | 3.97679600  | 4.59228000  |
| H | 1.51574700  | 3.92945800  | 3.62162500  |
| C | -2.92024600 | 5.82070500  | 0.07055900  |
| H | -1.97250800 | 6.09138300  | -0.40934500 |
| H | -2.92161700 | 6.32584300  | 1.04449300  |
| C | -4.06980000 | 6.36183900  | -0.76941700 |
| C | -3.99324300 | 6.42629600  | -2.10411700 |
| H | -3.11916400 | 6.07926600  | -2.64930900 |
| H | -4.80514400 | 6.83046700  | -2.70354600 |
| C | -5.26811700 | 6.91721000  | -0.03359800 |
| H | -4.96405300 | 7.73854700  | 0.63039200  |
| H | -6.01967700 | 7.30500900  | -0.72817100 |
| H | -5.75054000 | 6.16599500  | 0.60209000  |

INT-14-3

0 imaginary frequency

H = -5315.381080

G = -5315.582533

E(M06-2X-DCM) = -5316.267416

|   |             |            |            |
|---|-------------|------------|------------|
| C | -2.85814400 | 4.26163100 | 0.36147900 |
| C | -4.21022000 | 3.83814400 | 1.00300000 |
| H | -4.44321800 | 4.54659500 | 1.81446000 |
| H | -4.97292600 | 4.03755600 | 0.24038900 |
| C | -4.50124900 | 2.44473600 | 1.54578600 |

|   |             |             |             |
|---|-------------|-------------|-------------|
| C | -2.66713700 | 3.55970800  | -1.01470000 |
| H | -1.87489700 | 4.06349000  | -1.58127300 |
| H | -3.58406200 | 3.66118900  | -1.59503300 |
| N | -2.34882600 | 2.14506300  | -0.95958900 |
| C | -3.10878900 | 1.13719200  | -1.45116400 |
| N | -2.49317400 | -0.08808300 | -1.28177400 |
| C | -2.96015100 | -1.38399300 | -1.53339000 |
| C | -4.30957700 | -1.76359300 | -1.44419200 |
| C | -1.99837800 | -2.36528500 | -1.81682900 |
| C | -4.66968500 | -3.09139800 | -1.66257400 |
| C | -2.37866300 | -3.69002000 | -2.02689900 |
| H | -0.95024200 | -2.08940800 | -1.87213700 |
| C | -3.71828500 | -4.06749900 | -1.96479900 |
| H | -4.01538600 | -5.09332400 | -2.14633100 |
| C | -1.32079300 | -4.73288700 | -2.24454900 |
| C | -6.10356700 | -3.51149900 | -1.47405000 |
| F | -1.77971900 | -5.80133400 | -2.92534100 |
| F | -0.83487400 | -5.20669900 | -1.06057900 |
| F | -0.25233400 | -4.24666900 | -2.92166000 |
| F | -6.44928300 | -4.50812600 | -2.31961600 |
| F | -6.96828500 | -2.49733000 | -1.65997800 |
| F | -6.31510800 | -3.98524700 | -0.21591400 |
| S | -4.59530100 | 1.36333500  | -2.22018300 |
| H | -5.06087000 | -1.02347900 | -1.21068300 |
| C | -3.61478200 | 1.51122500  | 1.90371400  |
| H | -1.51813900 | -0.04686800 | -0.98475100 |
| H | -3.94656900 | 0.55446100  | 2.29790900  |
| H | -1.44296300 | 1.89860500  | -0.57161600 |
| H | 1.37593000  | 1.61005900  | 1.83812400  |
| O | 0.97101100  | -1.55325600 | 0.72411600  |
| O | 2.80644700  | -0.24486900 | -0.55330900 |
| P | 1.42686600  | -0.08173800 | 0.26101800  |
| O | 0.27827500  | 0.58766200  | -0.39666700 |
| C | 3.43925400  | -3.78925800 | 3.26250600  |
| C | 3.74371300  | -3.67731000 | 1.91077300  |
| C | 2.86218100  | -3.03130000 | 1.02931800  |
| C | 1.38670200  | -2.50573600 | 2.91144800  |
| C | 2.24642800  | -3.24616300 | 3.73951000  |
| C | 2.83589900  | -1.03439800 | -1.72831700 |
| C | 2.97483000  | -2.41435800 | -1.60654500 |
| C | 2.88379000  | -3.20024100 | -2.76858800 |
| C | 2.74674900  | -2.61096200 | -4.02024900 |
| C | 2.69865400  | -1.22112200 | -4.11754800 |
| C | 2.72775100  | -0.39880100 | -2.97974300 |



|   |              |              |              |
|---|--------------|--------------|--------------|
| H | 1. 97630300  | -3. 36571200 | 4. 78428600  |
| H | 2. 61517400  | -0. 74668500 | -5. 09073300 |
| C | 3. 30024600  | -3. 30200900 | -0. 40761100 |
| C | 4. 84303100  | -3. 45337000 | -0. 19657600 |
| H | 5. 32432300  | -3. 99724600 | -1. 01523400 |
| H | 5. 29186800  | -2. 45493800 | -0. 14207800 |
| H | 2. 17918600  | -5. 24754600 | -2. 96462200 |
| H | 3. 91531900  | -5. 10157000 | -2. 68459200 |
| C | 1. 75699600  | -2. 37557300 | 1. 55992500  |
| H | 4. 11447500  | -4. 30170300 | 3. 94284000  |
| H | 2. 67846400  | -3. 22336300 | -4. 91541600 |
| C | 4. 97370900  | -4. 15955800 | 1. 17194200  |
| H | 4. 97614600  | -5. 25266600 | 1. 06242600  |
| H | 5. 89892500  | -3. 89309100 | 1. 69479400  |
| C | 2. 93784400  | -4. 67104000 | -2. 42643900 |
| C | 2. 70247700  | -4. 66488400 | -0. 90318700 |
| H | 3. 14794300  | -5. 52189900 | -0. 39007800 |
| H | 1. 62670200  | -4. 67893400 | -0. 70348500 |
| C | 2. 67877300  | 1. 08876900  | -3. 15212400 |
| C | 3. 87127400  | 1. 84216300  | -3. 02600500 |
| C | 1. 47127700  | 1. 72030000  | -3. 53382000 |
| C | 5. 14256200  | 1. 24419600  | -2. 75114300 |
| C | 3. 83347800  | 3. 27407800  | -3. 21848000 |
| C | 1. 45266200  | 3. 15162100  | -3. 74202100 |
| C | 6. 28042700  | 2. 00142600  | -2. 64616900 |
| H | 5. 20027400  | 0. 16783700  | -2. 63152600 |
| C | 5. 03975200  | 4. 02951200  | -3. 08164600 |
| C | 2. 62559100  | 3. 88872500  | -3. 56008600 |
| C | 6. 23116900  | 3. 41570900  | -2. 80263800 |
| H | 7. 23271900  | 1. 51920700  | -2. 44227800 |
| H | 4. 98959100  | 5. 10714200  | -3. 21870100 |
| H | 2. 60362800  | 4. 96609700  | -3. 71214200 |
| H | 7. 14241900  | 4. 00011200  | -2. 70985200 |
| C | 0. 12090600  | -1. 93371100 | 3. 46925300  |
| C | -1. 12906500 | -2. 44605600 | 3. 03649100  |
| C | 0. 17316700  | -0. 94149100 | 4. 48048600  |
| C | -1. 25283100 | -3. 48483300 | 2. 05929400  |
| C | -2. 34994900 | -1. 92890600 | 3. 61297200  |
| C | -1. 05718000 | -0. 44474500 | 5. 05611500  |
| C | -2. 47874600 | -3. 94744800 | 1. 65808000  |
| H | -0. 35710100 | -3. 91790700 | 1. 62939000  |
| C | -3. 60946100 | -2. 43339800 | 3. 15922100  |
| C | -2. 27990200 | -0. 94699600 | 4. 60485800  |
| C | -3. 67886100 | -3. 40807600 | 2. 20092400  |

|   |             |             |             |
|---|-------------|-------------|-------------|
| H | -2.53257100 | -4.73019900 | 0.90882800  |
| H | -4.51522500 | -2.01969000 | 3.59655700  |
| H | -3.20192300 | -0.56404100 | 5.03732700  |
| H | -4.63880900 | -3.76532900 | 1.84056200  |
| C | -0.89586500 | 1.64349800  | -4.14107200 |
| H | -1.81246400 | 1.08026500  | -4.28884700 |
| C | 0.24822400  | 1.00385600  | -3.74177800 |
| H | 0.23724800  | -0.06858300 | -3.58365600 |
| C | -0.90659900 | 3.05316400  | -4.34781700 |
| H | -1.82601000 | 3.53856200  | -4.66232700 |
| C | 0.23397400  | 3.78296900  | -4.14666000 |
| H | 0.24115500  | 4.85906000  | -4.30487900 |
| C | 1.41254300  | 0.57889100  | 5.94199700  |
| H | 2.36052900  | 0.99100100  | 6.27526000  |
| C | 0.19825300  | 1.05297400  | 6.51402700  |
| H | 0.22854600  | 1.80996800  | 7.29312700  |
| C | -0.99962200 | 0.55464000  | 6.07755300  |
| H | -1.93665400 | 0.90890000  | 6.50080400  |
| C | 1.40020300  | -0.38192700 | 4.96421400  |
| H | 2.33706900  | -0.72519700 | 4.54179600  |
| N | 1.99613800  | 0.84159700  | 1.56498000  |
| S | 3.51903700  | 0.98952500  | 2.27625500  |
| C | 4.58834500  | 1.87278200  | 0.98611400  |
| O | 4.11658400  | -0.32356400 | 2.45828200  |
| O | 3.34736200  | 1.95082400  | 3.35797200  |
| F | 5.43972200  | 2.65387400  | 1.64735500  |
| F | 5.26337000  | 0.97866500  | 0.27769000  |
| F | 3.82518500  | 2.62093000  | 0.18749400  |
| H | -2.54434500 | 1.63778200  | 1.80474800  |
| C | -5.98483900 | 2.19243500  | 1.70284900  |
| H | -6.47828600 | 2.17820400  | 0.72227000  |
| H | -6.18159800 | 1.23603800  | 2.19678500  |
| H | -6.46703900 | 2.98569100  | 2.29221900  |
| C | -1.63371800 | 4.10041200  | 1.28179500  |
| C | -0.33156300 | 4.07846300  | 0.75584600  |
| C | -1.76158900 | 4.08060100  | 2.68127600  |
| C | 0.79132100  | 4.02611700  | 1.58794900  |
| H | -0.17177800 | 4.11041900  | -0.31785900 |
| C | -0.64652800 | 4.01442800  | 3.51568100  |
| H | -2.74787400 | 4.08511000  | 3.13159600  |
| C | 0.64104300  | 3.98656900  | 2.97598400  |
| H | 1.78357100  | 4.02465500  | 1.14377000  |
| H | -0.78458100 | 3.97388600  | 4.59252900  |
| H | 1.51164900  | 3.92943000  | 3.62174700  |

|   |             |            |             |
|---|-------------|------------|-------------|
| C | -2.92542800 | 5.81842800 | 0.07100300  |
| H | -1.97797300 | 6.08956000 | -0.40919400 |
| H | -2.92674100 | 6.32357400 | 1.04493700  |
| C | -4.07552000 | 6.35896800 | -0.76860700 |
| C | -3.99954900 | 6.42302600 | -2.10336700 |
| H | -3.12555000 | 6.07615600 | -2.64878500 |
| H | -4.81184600 | 6.82665600 | -2.70262000 |
| C | -5.27365200 | 6.91425800 | -0.03245000 |
| H | -6.02607100 | 7.30066400 | -0.72686400 |
| H | -5.75494200 | 6.16348800 | 0.60460600  |
| H | -4.96961800 | 7.73665600 | 0.63025200  |

INT-14-4

0 imaginary frequency

H = -5315.380543

G = -5315.582583

E(M06-2X-DCM) = -5316.268253

|   |             |             |             |
|---|-------------|-------------|-------------|
| C | -2.15628700 | 4.67024200  | 0.91817500  |
| C | -3.23530700 | 4.23267100  | 1.96398300  |
| H | -3.01583800 | 4.74876500  | 2.90911100  |
| H | -4.18994900 | 4.64222900  | 1.62819300  |
| C | -3.45973200 | 2.75923400  | 2.26406600  |
| C | -2.44770900 | 4.02879900  | -0.46190500 |
| H | -1.83714000 | 4.50996600  | -1.23656500 |
| H | -3.48599500 | 4.21706500  | -0.73458400 |
| N | -2.25995100 | 2.58674700  | -0.51594900 |
| C | -3.11621300 | 1.70833100  | -1.09425900 |
| N | -2.63722600 | 0.41329100  | -1.03867700 |
| C | -3.26051300 | -0.78628400 | -1.40769700 |
| C | -4.63837600 | -1.01917300 | -1.26492000 |
| C | -2.44158700 | -1.82573900 | -1.87098600 |
| C | -5.16995700 | -2.25852800 | -1.61248500 |
| C | -2.99212300 | -3.06235100 | -2.20794000 |
| H | -1.37314800 | -1.66388900 | -1.96940800 |
| C | -4.36186400 | -3.28942000 | -2.09608900 |
| H | -4.79107900 | -4.24372300 | -2.37678500 |
| C | -2.08611600 | -4.18460000 | -2.62373700 |
| C | -6.63104600 | -2.53497400 | -1.37456800 |
| F | -1.60604900 | -4.86610200 | -1.54280200 |
| F | -1.00014200 | -3.74356200 | -3.30320300 |
| F | -2.70942300 | -5.09171800 | -3.40131100 |
| F | -7.37349500 | -1.41291400 | -1.35749400 |
| F | -6.82535700 | -3.15579600 | -0.17923100 |
| F | -7.14536600 | -3.35561400 | -2.31784600 |

|   |             |             |             |
|---|-------------|-------------|-------------|
| S | -4.56891600 | 2.15520100  | -1.82856500 |
| H | -5.27928300 | -0.23520300 | -0.88884700 |
| C | -4.66510800 | 2.21394800  | 2.06033400  |
| H | -1.65515600 | 0.31523400  | -0.77893500 |
| H | -4.86789600 | 1.17517700  | 2.31043000  |
| H | -1.36713900 | 2.22384800  | -0.19690200 |
| H | 1.66435200  | 1.31528900  | 1.83659100  |
| O | 0.73166100  | -1.73632700 | 0.57387600  |
| O | 2.63327700  | -0.53702300 | -0.71133200 |
| P | 1.33881300  | -0.29210900 | 0.21569800  |
| O | 0.24753900  | 0.57836600  | -0.28528600 |
| C | 3.02059000  | -4.57441300 | 2.63530400  |
| C | 3.26279500  | -4.32598000 | 1.28943000  |
| C | 2.42443200  | -3.47115300 | 0.55521400  |
| C | 1.13183700  | -3.02102700 | 2.58548300  |
| C | 1.93224600  | -3.96151200 | 3.25475000  |
| C | 2.49228200  | -1.18085700 | -1.96295700 |
| C | 2.46076000  | -2.57115500 | -2.00205000 |
| C | 2.20636100  | -3.20003100 | -3.23309300 |
| C | 2.07618100  | -2.45642800 | -4.40053200 |
| C | 2.20118900  | -1.06899400 | -4.34261500 |
| C | 2.39890800  | -0.39503800 | -3.12678400 |
| H | 1.70272400  | -4.18477900 | 4.29211100  |
| H | 2.12648700  | -0.47799000 | -5.25050800 |
| C | 2.74001500  | -3.62180200 | -0.93164600 |
| C | 4.26097700  | -3.97822400 | -0.85074700 |
| H | 4.62284000  | -4.47061400 | -1.75861400 |
| H | 4.83353800  | -3.05338100 | -0.71480200 |
| H | 1.23860900  | -5.11218200 | -3.59788400 |
| H | 2.99218800  | -5.20774300 | -3.42722400 |
| C | 1.44680600  | -2.75598200 | 1.23963600  |
| H | 3.66076300  | -5.24759100 | 3.19955800  |
| H | 1.88094500  | -2.94735600 | -5.35019200 |
| C | 4.37861500  | -4.85659700 | 0.41493600  |
| H | 4.23780400  | -5.92068800 | 0.18122500  |
| H | 5.35779000  | -4.76728900 | 0.89843900  |
| C | 2.09338000  | -4.69629600 | -3.05570300 |
| C | 1.94800600  | -4.83802600 | -1.52754600 |
| H | 2.30992600  | -5.79555300 | -1.14257500 |
| H | 0.89232900  | -4.74652500 | -1.25507600 |
| C | 2.53752700  | 1.09612800  | -3.12791100 |
| C | 3.82052700  | 1.67441500  | -2.96874400 |
| C | 1.40972900  | 1.91417400  | -3.37632200 |
| C | 5.01086000  | 0.89426100  | -2.81366300 |

|   |             |             |             |
|---|-------------|-------------|-------------|
| C | 3.96262100  | 3.11248900  | -2.99704400 |
| C | 1.57067400  | 3.35089000  | -3.42428300 |
| C | 6.23887700  | 1.48589000  | -2.66853700 |
| H | 4.93299500  | -0.18731000 | -2.81980000 |
| C | 5.25955500  | 3.69011700  | -2.82544000 |
| C | 2.83481500  | 3.90930100  | -3.21572800 |
| C | 6.36834100  | 2.90383000  | -2.66385700 |
| H | 7.12599300  | 0.86789200  | -2.55853500 |
| H | 5.34523600  | 4.77409700  | -2.83901000 |
| H | 2.94799500  | 4.99117800  | -3.24640000 |
| H | 7.34930700  | 3.35490500  | -2.54250200 |
| C | -0.02401200 | -2.39407700 | 3.30091600  |
| C | -1.34851500 | -2.69890900 | 2.89430000  |
| C | 0.20322900  | -1.57715800 | 4.43717400  |
| C | -1.65112700 | -3.55186700 | 1.78512400  |
| C | -2.46467800 | -2.15544900 | 3.63591000  |
| C | -0.92409900 | -1.05828600 | 5.17950200  |
| C | -2.94443200 | -3.81115700 | 1.41379700  |
| H | -0.83988900 | -4.00465500 | 1.22708400  |
| C | -3.79938900 | -2.44235100 | 3.20809200  |
| C | -2.22180700 | -1.36099200 | 4.75983500  |
| C | -4.03887900 | -3.23863700 | 2.12118300  |
| H | -3.13391600 | -4.45601500 | 0.56229100  |
| H | -4.62275200 | -2.00734500 | 3.76992000  |
| H | -3.06606400 | -0.96548900 | 5.32116300  |
| H | -5.05352000 | -3.42865900 | 1.78442200  |
| C | -0.97013400 | 2.20631500  | -3.85625500 |
| H | -1.95884600 | 1.78440200  | -4.00979700 |
| C | 0.09559000  | 1.38608800  | -3.59303600 |
| H | -0.05023600 | 0.31276200  | -3.54983000 |
| C | -0.80326700 | 3.62042800  | -3.91063800 |
| H | -1.66258700 | 4.25107500  | -4.11917100 |
| C | 0.43085600  | 4.17282000  | -3.69491100 |
| H | 0.57252500  | 5.25040700  | -3.73502000 |
| C | 1.69604300  | -0.42267400 | 5.99293500  |
| H | 2.70320800  | -0.15755900 | 6.30141400  |
| C | 0.58194600  | 0.07204500  | 6.72777400  |
| H | 0.74654100  | 0.69862800  | 7.60012500  |
| C | -0.68951700 | -0.23843000 | 6.32758700  |
| H | -1.55148700 | 0.13621900  | 6.87472400  |
| C | 1.51394400  | -1.21921100 | 4.89202500  |
| H | 2.37692200  | -1.58172300 | 4.34673700  |
| N | 2.10245800  | 0.43767900  | 1.54737800  |
| S | 3.63609800  | 0.26303200  | 2.23043800  |

|   |             |             |             |
|---|-------------|-------------|-------------|
| C | 4.84852500  | 0.98918600  | 0.97135800  |
| O | 3.97796800  | -1.14719800 | 2.32762600  |
| O | 3.65696600  | 1.17905300  | 3.36299500  |
| F | 4.26395100  | 1.96334500  | 0.27447900  |
| F | 5.87429400  | 1.48797000  | 1.65904900  |
| F | 5.28259200  | 0.03479100  | 0.15820200  |
| H | -5.48545900 | 2.77297500  | 1.61875300  |
| C | -2.34826000 | 1.95214500  | 2.89026800  |
| H | -1.47501000 | 1.87225100  | 2.23284500  |
| H | -1.98902900 | 2.41246100  | 3.82019000  |
| H | -2.68355500 | 0.93778900  | 3.12170600  |
| C | -0.71120400 | 4.41802600  | 1.40018900  |
| C | 0.31533800  | 4.07584900  | 0.50442000  |
| C | -0.34184100 | 4.63284100  | 2.74031600  |
| C | 1.63730000  | 3.91729800  | 0.93066000  |
| H | 0.10498000  | 3.93279400  | -0.55023900 |
| C | 0.97320400  | 4.47110500  | 3.17365700  |
| H | -1.08969100 | 4.92564900  | 3.46953300  |
| C | 1.97477300  | 4.10395500  | 2.27188300  |
| H | 2.39938400  | 3.65721200  | 0.20233100  |
| H | 1.21625600  | 4.63337900  | 4.22034300  |
| H | 2.99866700  | 3.97296700  | 2.60964500  |
| C | -2.24040800 | 6.24105400  | 0.72466400  |
| H | -1.28417800 | 6.56027800  | 0.29796700  |
| H | -2.28868800 | 6.68444500  | 1.72973700  |
| C | -3.34261800 | 6.83470500  | -0.13923300 |
| C | -3.03273600 | 7.40900800  | -1.30849000 |
| H | -2.01268700 | 7.43232800  | -1.68455800 |
| H | -3.78867600 | 7.87878800  | -1.93308200 |
| C | -4.77020200 | 6.83826900  | 0.36043000  |
| H | -5.23619600 | 5.84808300  | 0.28453800  |
| H | -4.82508400 | 7.13800200  | 1.41486100  |
| H | -5.38607200 | 7.52959500  | -0.22322300 |

INT-14 欵?0 imaginary frequency

H = -5315.368837

G = -5315.572998

E(M06-2X-DCM) = -5316.267404

|   |             |             |             |
|---|-------------|-------------|-------------|
| O | -0.57388500 | -2.34566500 | -1.27093700 |
| O | -2.63627100 | -1.11333700 | -0.28766300 |
| P | -1.00187900 | -1.10875100 | -0.28046800 |
| O | -0.56299400 | 0.21990900  | -0.82444600 |
| C | -1.64309200 | -1.92126600 | -5.29821400 |
| C | -2.55363100 | -2.41095500 | -4.36746900 |

|   |             |             |             |
|---|-------------|-------------|-------------|
| C | -2.16302100 | -2.63280800 | -3.03871200 |
| C | 0.07040400  | -1.79158500 | -3.55075700 |
| C | -0.33669000 | -1.65360800 | -4.89015700 |
| C | -3.34108600 | -2.25381500 | 0.11193300  |
| C | -3.50547400 | -3.30534200 | -0.79115300 |
| C | -4.07519200 | -4.50813300 | -0.34348800 |
| C | -4.57117300 | -4.62291700 | 0.95000600  |
| C | -4.50821100 | -3.51767800 | 1.79663200  |
| C | -3.89061700 | -2.31693600 | 1.40791900  |
| H | 0.39340200  | -1.30707600 | -5.61557700 |
| H | -4.92908300 | -3.57659500 | 2.79598800  |
| C | -3.25795500 | -3.38838600 | -2.29587200 |
| C | -4.51398400 | -2.92083400 | -3.10665700 |
| H | -4.83502500 | -1.94432300 | -2.72589600 |
| H | -5.35704400 | -3.61140800 | -3.00620100 |
| H | -5.03799700 | -5.71580000 | -1.86607800 |
| H | -3.69793000 | -6.53110000 | -1.06692300 |
| C | -0.88787700 | -2.25161700 | -2.62625200 |
| H | -1.93563500 | -1.75884600 | -6.33255000 |
| H | -5.01464800 | -5.55315600 | 1.29612300  |
| C | -4.01029600 | -2.77396000 | -4.55982900 |
| H | -4.56157600 | -2.01256700 | -5.12348800 |
| H | -4.11540200 | -3.71512000 | -5.11755300 |
| C | -4.04007300 | -5.55655300 | -1.43359300 |
| C | -3.07316000 | -4.93477200 | -2.46231500 |
| H | -2.04041900 | -5.19404000 | -2.20236200 |
| H | -3.25324500 | -5.26868500 | -3.48895900 |
| C | -3.91878300 | -1.16544100 | 2.36527600  |
| C | -3.20023600 | -1.23497800 | 3.58287900  |
| C | -4.77931200 | -0.06868100 | 2.10882700  |
| C | -2.30134200 | -2.30587700 | 3.89062900  |
| C | -3.35633200 | -0.18677300 | 4.56637500  |
| C | -4.91079700 | 0.98118200  | 3.09373500  |
| C | -1.62458000 | -2.34751500 | 5.08053000  |
| H | -2.12900700 | -3.07304300 | 3.14701000  |
| C | -2.63972000 | -0.27499200 | 5.80107600  |
| C | -4.20313400 | 0.89012600  | 4.29488000  |
| C | -1.80093800 | -1.32536700 | 6.05586100  |
| H | -0.92630600 | -3.15690900 | 5.27212000  |
| H | -2.77519800 | 0.51915400  | 6.53186500  |
| H | -4.31601000 | 1.67735700  | 5.03778600  |
| H | -1.25572100 | -1.37777400 | 6.99445400  |
| C | 1.49119900  | -1.49046900 | -3.19161500 |
| C | 2.00898700  | -0.18674600 | -3.39602100 |

|   |             |             |             |
|---|-------------|-------------|-------------|
| C | 2.34876600  | -2.53100000 | -2.75241300 |
| C | 1.19279900  | 0.92150100  | -3.79671300 |
| C | 3.41814300  | 0.06516900  | -3.19270000 |
| C | 3.74473400  | -2.25002600 | -2.50395700 |
| C | 1.72970200  | 2.16224700  | -4.02758200 |
| H | 0.12655300  | 0.76754900  | -3.91090500 |
| C | 3.94304200  | 1.36987600  | -3.46352300 |
| C | 4.24426200  | -0.96668300 | -2.74044200 |
| C | 3.12730900  | 2.39119000  | -3.87357800 |
| H | 1.08360900  | 2.97973500  | -4.33684500 |
| H | 5.01271400  | 1.52586800  | -3.34248000 |
| H | 5.29921500  | -0.76527300 | -2.56738300 |
| H | 3.54042500  | 3.37407300  | -4.08513700 |
| C | -6.40224200 | 1.11049600  | 0.70641100  |
| H | -6.99468100 | 1.16020600  | -0.20348500 |
| C | -5.57108900 | 0.04037400  | 0.92013600  |
| H | -5.51590500 | -0.75022400 | 0.18033100  |
| C | -6.50703100 | 2.15445800  | 1.66945100  |
| H | -7.17216400 | 2.99412700  | 1.48557000  |
| C | -5.78258500 | 2.08383200  | 2.82941500  |
| H | -5.86424700 | 2.86447400  | 3.58246800  |
| C | 2.75926800  | -4.85968300 | -2.13345800 |
| H | 2.39112000  | -5.87281800 | -1.99641000 |
| C | 4.12573700  | -4.56902100 | -1.86151400 |
| H | 4.78611000  | -5.35869600 | -1.51373700 |
| C | 4.60135500  | -3.30007300 | -2.04839200 |
| H | 5.64570600  | -3.06435500 | -1.85800100 |
| C | 1.90578100  | -3.87936200 | -2.56659100 |
| H | 0.87197300  | -4.12614000 | -2.77639700 |
| C | -1.66763800 | 3.81608000  | -0.73490600 |
| C | -2.33006900 | 2.94567000  | 0.38800600  |
| H | -3.41762600 | 2.99340500  | 0.27567200  |
| H | -2.06031500 | 1.90198900  | 0.20918000  |
| C | -1.97655900 | 3.30110100  | 1.82506800  |
| C | -0.15438700 | 3.95663400  | -0.42512800 |
| H | -0.03973100 | 4.54137200  | 0.49270700  |
| H | 0.34215200  | 4.49159700  | -1.24227200 |
| N | 0.55760000  | 2.68023800  | -0.23914400 |
| C | 1.79124500  | 2.61765700  | 0.22567300  |
| N | 2.40724800  | 1.44478100  | 0.42005100  |
| C | 3.75678900  | 1.24424900  | 0.85141700  |
| C | 4.81557400  | 1.58702200  | 0.01096600  |
| C | 3.99459000  | 0.62616400  | 2.08417500  |
| C | 6.12756300  | 1.33214600  | 0.41707200  |



|   |              |              |              |
|---|--------------|--------------|--------------|
| C | 5. 31048400  | 0. 37662400  | 2. 47252700  |
| H | 3. 16052100  | 0. 32908700  | 2. 71222100  |
| C | 6. 38105800  | 0. 73009600  | 1. 64693900  |
| H | 7. 39924900  | 0. 53620300  | 1. 96114500  |
| C | 5. 58068800  | -0. 33003000 | 3. 77970400  |
| C | 7. 24867200  | 1. 70762300  | -0. 51591500 |
| F | 5. 57714200  | -1. 66903600 | 3. 62573700  |
| F | 4. 65443600  | -0. 02532000 | 4. 70826400  |
| F | 6. 79128100  | 0. 01062800  | 4. 27909600  |
| F | 7. 12495100  | 1. 07790100  | -1. 71277300 |
| F | 8. 45835100  | 1. 39266600  | -0. 01861800 |
| F | 7. 24449000  | 3. 03363600  | -0. 77986900 |
| S | 2. 57856600  | 4. 16343600  | 0. 60507800  |
| H | 4. 60923700  | 2. 02466400  | -0. 96009200 |
| H | 1. 88373100  | 0. 55983700  | 0. 29747900  |
| H | 0. 09158500  | 1. 77962700  | -0. 46823200 |
| C | -1. 26768100 | 2. 45245700  | 2. 58031800  |
| H | -0. 92067400 | 1. 49055600  | 2. 21264500  |
| H | 3. 69332100  | 3. 60872600  | 1. 11798600  |
| H | -1. 04421400 | 2. 67264200  | 3. 62160500  |
| N | -0. 57423800 | -1. 56967900 | 1. 20590000  |
| S | 0. 93208700  | -1. 67490500 | 1. 67680600  |
| O | 1. 14204000  | -1. 13038600 | 3. 02540500  |
| O | 1. 91911500  | -1. 25969000 | 0. 63837000  |
| C | 1. 21123900  | -3. 51425300 | 1. 85448500  |
| F | 0. 99624500  | -4. 13619700 | 0. 69346600  |
| F | 0. 37970900  | -4. 01965700 | 2. 77718800  |
| F | 2. 47049600  | -3. 73614400 | 2. 24492700  |
| C | -2. 28636900 | 5. 22956600  | -0. 81611500 |
| C | -1. 51675100 | 6. 39829500  | -0. 94435700 |
| C | -3. 68398500 | 5. 38577600  | -0. 81398600 |
| C | -2. 10959700 | 7. 65954500  | -1. 04678300 |
| H | -0. 43322700 | 6. 35459700  | -0. 96062700 |
| C | -4. 27985900 | 6. 64156100  | -0. 91674300 |
| H | -4. 32607700 | 4. 51688200  | -0. 73425200 |
| C | -3. 49597900 | 7. 78988000  | -1. 03134600 |
| H | -1. 47756700 | 8. 53927600  | -1. 13700500 |
| H | -5. 36396500 | 6. 71905400  | -0. 90806700 |
| H | -3. 95936000 | 8. 76967900  | -1. 10836900 |
| C | -1. 77414200 | 3. 13030200  | -2. 15483600 |
| H | -1. 20660600 | 3. 77291400  | -2. 83916800 |
| H | -1. 24819600 | 2. 17071800  | -2. 10178700 |
| C | -3. 13708400 | 2. 87480700  | -2. 77415400 |
| C | -3. 62504300 | 3. 69754800  | -3. 71045400 |

|   |             |            |             |
|---|-------------|------------|-------------|
| H | -3.09465000 | 4.59401500 | -4.02140700 |
| H | -4.57871400 | 3.50625900 | -4.19708100 |
| C | -3.86952800 | 1.61382700 | -2.38072900 |
| H | -4.77822000 | 1.48708500 | -2.97903000 |
| H | -3.23317700 | 0.73189700 | -2.52363300 |
| H | -4.15906500 | 1.60555500 | -1.32425700 |
| C | -2.50843400 | 4.59327500 | 2.40184800  |
| H | -2.25424900 | 4.68112800 | 3.46309900  |
| H | -2.12053600 | 5.47791700 | 1.88360400  |
| H | -3.60146000 | 4.63779400 | 2.30674300  |

INT-14欵?1

0 imaginary frequency

H = -5315.366638

G = -5315.568938

E(M06-2X-DCM) = -5316.265704

|   |             |             |             |
|---|-------------|-------------|-------------|
| O | -0.61785900 | -2.26352400 | -0.95460100 |
| O | -2.78051500 | -0.86539100 | -0.61544700 |
| P | -1.18963700 | -0.90003400 | -0.23732400 |
| O | -0.54601800 | 0.33837100  | -0.78087600 |
| C | -0.86814600 | -2.51541000 | -5.13258300 |
| C | -1.96016500 | -2.83080700 | -4.33173300 |
| C | -1.84378700 | -2.82407300 | -2.93438600 |
| C | 0.47766600  | -2.10223400 | -3.12435800 |
| C | 0.34202500  | -2.19273200 | -4.52288700 |
| C | -3.61491100 | -1.90955600 | -0.20221700 |
| C | -3.63197900 | -3.10163500 | -0.92766200 |
| C | -4.33419400 | -4.20626200 | -0.41914700 |
| C | -5.10115100 | -4.09249900 | 0.73419900  |
| C | -5.17916800 | -2.85461400 | 1.36919600  |
| C | -4.44140200 | -1.74351200 | 0.92724400  |
| H | 1.21366000  | -1.98451800 | -5.13577600 |
| H | -5.81188300 | -2.73358600 | 2.24348400  |
| C | -3.08988500 | -3.44020600 | -2.31241000 |
| C | -4.14530800 | -3.11023700 | -3.42186800 |
| H | -4.49386100 | -2.08102900 | -3.27792500 |
| H | -5.01855500 | -3.76842500 | -3.37749300 |
| H | -5.00719000 | -5.65901800 | -1.88223300 |
| H | -3.88943100 | -6.32356300 | -0.69580700 |
| C | -0.65995000 | -2.38526000 | -2.34265800 |
| H | -0.94637000 | -2.53333700 | -6.21680800 |
| H | -5.64698000 | -4.94617200 | 1.12804400  |
| C | -3.36299600 | -3.21452700 | -4.74876600 |
| H | -3.76334800 | -2.55696200 | -5.52914200 |

|   |             |             |             |
|---|-------------|-------------|-------------|
| H | -3.39290400 | -4.23606100 | -5.15324900 |
| C | -4.11385600 | -5.42712800 | -1.28522600 |
| C | -2.93500000 | -4.99280600 | -2.18064300 |
| H | -1.98696700 | -5.20837400 | -1.67458100 |
| H | -2.91637600 | -5.49509700 | -3.15289200 |
| C | -4.64495100 | -0.44138500 | 1.63699600  |
| C | -4.22578800 | -0.28952500 | 2.98059600  |
| C | -5.39687000 | 0.58115500  | 1.00587300  |
| C | -3.45952900 | -1.28460300 | 3.66801700  |
| C | -4.56882500 | 0.91351900  | 3.70521200  |
| C | -5.71913100 | 1.78566800  | 1.73843600  |
| C | -3.07670500 | -1.11238100 | 4.97162500  |
| H | -3.14812400 | -2.16925700 | 3.12818600  |
| C | -4.15481200 | 1.05029800  | 5.06734500  |
| C | -5.29999900 | 1.91711400  | 3.06524200  |
| C | -3.43439400 | 0.06558700  | 5.68696800  |
| H | -2.46999900 | -1.87150700 | 5.45617800  |
| H | -4.42483800 | 1.96066400  | 5.59747300  |
| H | -5.55343100 | 2.82111100  | 3.61490900  |
| H | -3.12060200 | 0.18283600  | 6.72082900  |
| C | 1.82874000  | -1.76635100 | -2.57758800 |
| C | 2.45281700  | -0.55490100 | -2.97193900 |
| C | 2.54778200  | -2.70972400 | -1.79963100 |
| C | 1.75684200  | 0.48368500  | -3.67316600 |
| C | 3.84691300  | -0.33218100 | -2.66488100 |
| C | 3.91767200  | -2.43194700 | -1.42672800 |
| C | 2.40270200  | 1.61700800  | -4.09702600 |
| H | 0.69345800  | 0.37145700  | -3.84676100 |
| C | 4.49069500  | 0.85129200  | -3.15013900 |
| C | 4.53961000  | -1.27201100 | -1.89719100 |
| C | 3.79414200  | 1.79807500  | -3.85282300 |
| H | 1.85066400  | 2.38834900  | -4.62818400 |
| H | 5.55006000  | 0.97992100  | -2.94570100 |
| H | 5.58575600  | -1.09309600 | -1.65832100 |
| H | 4.29575300  | 2.68959600  | -4.22034100 |
| C | -6.64746900 | 1.46413000  | -0.90333300 |
| H | -7.02811300 | 1.34040000  | -1.91404200 |
| C | -5.90268200 | 0.46614200  | -0.32931700 |
| H | -5.69788700 | -0.43888800 | -0.88955900 |
| C | -6.93803600 | 2.66025500  | -0.18636400 |
| H | -7.52902900 | 3.44185100  | -0.65658000 |
| C | -6.48504700 | 2.81047300  | 1.09739000  |
| H | -6.71328200 | 3.71055700  | 1.66408400  |
| C | 2.70762300  | -4.83500800 | -0.60298400 |

|   |             |             |             |
|---|-------------|-------------|-------------|
| H | 2.25314400  | -5.77042700 | -0.28848400 |
| C | 4.03714900  | -4.53109300 | -0.19617600 |
| H | 4.58157200  | -5.22900100 | 0.43390900  |
| C | 4.62478900  | -3.36563500 | -0.60581300 |
| H | 5.64068000  | -3.12200300 | -0.30528500 |
| C | 1.99342600  | -3.96051900 | -1.37897900 |
| H | 0.98394200  | -4.21496300 | -1.67671200 |
| C | -1.47586500 | 3.92347300  | -0.25911500 |
| C | -2.16853000 | 3.12771600  | 0.90991700  |
| H | -3.24760800 | 3.20059700  | 0.75824700  |
| H | -1.92059700 | 2.06855600  | 0.78693400  |
| C | -1.87258400 | 3.55786600  | 2.34301100  |
| C | 0.04879100  | 3.96931400  | -0.03888700 |
| H | 0.22186600  | 4.48967300  | 0.90812500  |
| H | 0.52245100  | 4.56535400  | -0.82575200 |
| N | 0.72361500  | 2.65640200  | 0.03573100  |
| C | 1.96423400  | 2.52770400  | 0.47101700  |
| N | 2.52195000  | 1.31799900  | 0.64834100  |
| C | 3.88726300  | 1.01882700  | 0.92151700  |
| C | 4.92313200  | 1.59649100  | 0.18007900  |
| C | 4.17641600  | 0.06687700  | 1.90801900  |
| C | 6.24634700  | 1.25313400  | 0.46048200  |
| C | 5.50255500  | -0.28221100 | 2.15425100  |
| H | 3.36606600  | -0.40944300 | 2.44614700  |
| C | 6.54620800  | 0.31752700  | 1.44863500  |
| H | 7.57592300  | 0.05609600  | 1.66307800  |
| C | 5.82293900  | -1.36949000 | 3.15054200  |
| C | 7.35422500  | 1.81947100  | -0.38815200 |
| F | 4.84896500  | -1.52274300 | 4.06447700  |
| F | 6.97329000  | -1.10549500 | 3.81056700  |
| F | 5.99069200  | -2.55926000 | 2.52940700  |
| F | 7.59664300  | 1.03022100  | -1.46692000 |
| F | 8.51221300  | 1.91473500  | 0.29431500  |
| F | 7.05001700  | 3.04637300  | -0.86092700 |
| S | 2.81841600  | 4.03631700  | 0.86806400  |
| H | 4.70164100  | 2.27640500  | -0.63357800 |
| H | 1.88826300  | 0.49888900  | 0.72643200  |
| H | 0.21787900  | 1.79607600  | -0.27985500 |
| C | -2.59454900 | 4.51318500  | 2.94461000  |
| H | -3.40926600 | 5.02644800  | 2.44017500  |
| H | 3.85244100  | 3.43388900  | 1.48603200  |
| H | -2.40857700 | 4.80140600  | 3.97656500  |
| N | -1.14997900 | -1.20397800 | 1.35059400  |
| S | 0.16987000  | -1.33624200 | 2.19955100  |

|   |             |             |             |
|---|-------------|-------------|-------------|
| O | 0.08074500  | -0.67043700 | 3.50339900  |
| O | 1.42466700  | -1.10100800 | 1.41872300  |
| C | 0.25284700  | -3.15757100 | 2.60880700  |
| F | -0.80522400 | -3.50344400 | 3.35707200  |
| F | 1.36864000  | -3.41058400 | 3.30186700  |
| F | 0.25256700  | -3.89624300 | 1.49663000  |
| C | -1.87343500 | 3.32165400  | -1.62021600 |
| C | -0.94767600 | 3.10670000  | -2.65151200 |
| C | -3.22345900 | 3.04826700  | -1.89725100 |
| C | -1.35354600 | 2.65358800  | -3.90886000 |
| H | 0.11092600  | 3.28368000  | -2.49460200 |
| C | -3.63029300 | 2.58779400  | -3.14785400 |
| H | -3.98295700 | 3.19662800  | -1.13726000 |
| C | -2.69749000 | 2.39256300  | -4.16622700 |
| H | -0.61116900 | 2.50415500  | -4.68842600 |
| H | -4.68292800 | 2.38056100  | -3.31920100 |
| H | -3.01242200 | 2.03725800  | -5.14368000 |
| C | -1.96679200 | 5.41977000  | -0.19393600 |
| H | -3.05924000 | 5.39323300  | -0.29202700 |
| H | -1.75293200 | 5.78486100  | 0.81509700  |
| C | -0.80994100 | 2.80455800  | 3.10878000  |
| H | -1.02700900 | 1.72989400  | 3.13660400  |
| H | 0.18513900  | 2.90625000  | 2.65823600  |
| H | -0.74083200 | 3.15931300  | 4.14176700  |
| C | -1.40293700 | 6.41169300  | -1.19970200 |
| C | -0.37869200 | 7.21066100  | -0.87122900 |
| H | 0.08794100  | 7.17455400  | 0.11096700  |
| H | 0.02131300  | 7.94347600  | -1.56788800 |
| C | -2.08375700 | 6.53060700  | -2.54303800 |
| H | -1.63164400 | 7.32349600  | -3.14743500 |
| H | -2.04062800 | 5.59596800  | -3.11084600 |
| H | -3.14827800 | 6.76864800  | -2.41210200 |

INT-14欵?2

O imaginary frequency

H = -5315.364040

G = -5315.568388

E(M06-2X-DCM) = -5316.264618

|   |             |             |             |
|---|-------------|-------------|-------------|
| O | -0.80498400 | -2.39529300 | -0.70975100 |
| O | -2.78627400 | -0.78116100 | -0.23799100 |
| P | -1.16439200 | -0.92028900 | -0.08225000 |
| O | -0.53484700 | 0.19311100  | -0.86371300 |
| C | -1.53354400 | -2.89044700 | -4.80554600 |
| C | -2.55859900 | -3.03446800 | -3.87672200 |

|   |             |             |             |
|---|-------------|-------------|-------------|
| C | -2.28852500 | -2.95878100 | -2.50301900 |
| C | 0.06121800  | -2.51453100 | -2.98149100 |
| C | -0.23475200 | -2.67335800 | -4.34812300 |
| C | -3.63472100 | -1.72520300 | 0.34718600  |
| C | -3.84969900 | -2.94464400 | -0.29705200 |
| C | -4.57771500 | -3.94896900 | 0.36115100  |
| C | -5.17044000 | -3.70725800 | 1.59491000  |
| C | -5.04938500 | -2.44035000 | 2.16240900  |
| C | -4.28320800 | -1.42711100 | 1.56231200  |
| H | 0.58188300  | -2.60481800 | -5.06052700 |
| H | -5.54513100 | -2.21842500 | 3.10285100  |
| C | -3.51191300 | -3.40407800 | -1.71253600 |
| C | -4.64614100 | -3.02117500 | -2.72183500 |
| H | -4.86806000 | -1.95358700 | -2.60977100 |
| H | -5.57173000 | -3.57704100 | -2.54218600 |
| H | -5.56851500 | -5.38665900 | -0.92395700 |
| H | -4.38282500 | -6.11215700 | 0.15641700  |
| C | -1.00893800 | -2.61606800 | -2.07097100 |
| H | -1.73184500 | -2.96293200 | -5.87210700 |
| H | -5.73452800 | -4.48447900 | 2.10435100  |
| C | -4.03256200 | -3.28199100 | -4.11554000 |
| H | -4.44780300 | -2.62585000 | -4.88937400 |
| H | -4.21536200 | -4.31349100 | -4.44796200 |
| C | -4.58894200 | -5.22427900 | -0.45227800 |
| C | -3.49444100 | -4.95685800 | -1.50540300 |
| H | -2.51651900 | -5.24491200 | -1.10284300 |
| H | -3.64454400 | -5.50475200 | -2.44087000 |
| C | -4.27633900 | -0.07645500 | 2.20835600  |
| C | -3.65541100 | 0.11067500  | 3.46620900  |
| C | -5.02396200 | 0.97467600  | 1.62019500  |
| C | -2.87594000 | -0.90801300 | 4.10211000  |
| C | -3.79153400 | 1.37756100  | 4.14990600  |
| C | -5.13973600 | 2.24033700  | 2.30897600  |
| C | -2.29076500 | -0.69798400 | 5.32235900  |
| H | -2.71833100 | -1.84456200 | 3.58348200  |
| C | -3.17296400 | 1.55116700  | 5.42801300  |
| C | -4.52509800 | 2.40554500  | 3.55310300  |
| C | -2.44702000 | 0.54344600  | 6.00201000  |
| H | -1.67907100 | -1.47850000 | 5.76478600  |
| H | -3.29157500 | 2.50829300  | 5.93082400  |
| H | -4.62227300 | 3.35791000  | 4.06999400  |
| H | -1.97550700 | 0.68920800  | 6.97019300  |
| C | 1.48853400  | -2.31058700 | -2.58277200 |
| C | 2.20495400  | -1.19673100 | -3.08886500 |

|   |              |              |              |
|---|--------------|--------------|--------------|
| C | 2. 16479600  | -3. 29696000 | -1. 81971600 |
| C | 1. 57313800  | -0. 13049400 | -3. 80903500 |
| C | 3. 63242900  | -1. 10576900 | -2. 88105900 |
| C | 3. 57987000  | -3. 15332500 | -1. 56032900 |
| C | 2. 30146400  | 0. 90208300  | -4. 34261500 |
| H | 0. 49477600  | -0. 13935600 | -3. 91154700 |
| C | 4. 35906700  | -0. 02359900 | -3. 47444900 |
| C | 4. 27841100  | -2. 07473700 | -2. 10961800 |
| C | 3. 71758400  | 0. 95007100  | -4. 19338600 |
| H | 1. 79586100  | 1. 69339000  | -4. 89086500 |
| H | 5. 43759500  | 0. 00478000  | -3. 33869700 |
| H | 5. 34749000  | -1. 98539700 | -1. 93054500 |
| H | 4. 28236400  | 1. 76068400  | -4. 64675300 |
| C | -6. 44304000 | 1. 86861500  | -0. 16229100 |
| H | -6. 96607100 | 1. 72872700  | -1. 10503600 |
| C | -5. 71586000 | 0. 83642100  | 0. 37337100  |
| H | -5. 66760200 | -0. 11229100 | -0. 14879300 |
| C | -6. 53200900 | 3. 12190100  | 0. 50933100  |
| H | -7. 11299700 | 3. 92924100  | 0. 07121800  |
| C | -5. 89871300 | 3. 29535900  | 1. 71119900  |
| H | -5. 96935600 | 4. 24100300  | 2. 24390100  |
| C | 2. 20038600  | -5. 39450400 | -0. 56496300 |
| H | 1. 67901800  | -6. 26865200 | -0. 18446300 |
| C | 3. 58557400  | -5. 22856000 | -0. 28389200 |
| H | 4. 10766500  | -5. 97146200 | 0. 31290500  |
| C | 4. 25329100  | -4. 14046100 | -0. 77535100 |
| H | 5. 31505600  | -4. 00614700 | -0. 58284400 |
| C | 1. 51876000  | -4. 46759300 | -1. 30887000 |
| H | 0. 46696800  | -4. 62073500 | -1. 51711200 |
| C | -1. 46351100 | 3. 82213500  | -1. 11979000 |
| C | -2. 08282200 | 3. 27610000  | 0. 22203400  |
| H | -3. 16595900 | 3. 40201800  | 0. 15098500  |
| H | -1. 90656100 | 2. 19680500  | 0. 26006100  |
| C | -1. 63220000 | 3. 91308500  | 1. 53264100  |
| C | 0. 07252100  | 3. 90301900  | -1. 01202900 |
| H | 0. 30214700  | 4. 58368900  | -0. 18602100 |
| H | 0. 47512800  | 4. 33832500  | -1. 93406700 |
| N | 0. 73982400  | 2. 61636300  | -0. 75172200 |
| C | 1. 98451500  | 2. 49142500  | -0. 31932800 |
| N | 2. 46471600  | 1. 32143700  | 0. 10768200  |
| C | 3. 78731100  | 1. 11705800  | 0. 62559000  |
| C | 3. 94377300  | 0. 83138000  | 1. 98570900  |
| C | 4. 88686100  | 1. 14806300  | -0. 22913200 |
| C | 5. 22454200  | 0. 59253000  | 2. 48324200  |

|   |             |             |             |
|---|-------------|-------------|-------------|
| C | 6.16224300  | 0.90811300  | 0.28609200  |
| H | 4.74325000  | 1.34107600  | -1.28591100 |
| C | 6.33742000  | 0.63203600  | 1.64022900  |
| H | 7.32920500  | 0.45440300  | 2.03808500  |
| C | 7.33132000  | 0.89602200  | -0.66275600 |
| C | 5.40688400  | 0.24059000  | 3.93969400  |
| F | 7.33310700  | -0.22378400 | -1.43330100 |
| F | 8.51343200  | 0.93498600  | -0.01905100 |
| F | 7.28938000  | 1.94423800  | -1.51433800 |
| F | 4.47600700  | 0.83013700  | 4.71423000  |
| F | 6.62231900  | 0.62942800  | 4.38973900  |
| F | 5.31775300  | -1.09013100 | 4.14116100  |
| S | 3.10677800  | 3.86885300  | -0.21851600 |
| H | 3.07563600  | 0.78242300  | 2.63464800  |
| H | 1.83383200  | 0.51013700  | 0.23194200  |
| H | 0.18356000  | 1.73445600  | -0.82637200 |
| C | -2.23643300 | 5.00547600  | 2.02066800  |
| H | -3.06700900 | 5.48485100  | 1.50903500  |
| H | 2.35039600  | 4.71273000  | -0.94242300 |
| H | -1.93937400 | 5.44188800  | 2.97143100  |
| N | -0.90108400 | -1.05234300 | 1.50679500  |
| S | 0.54972400  | -1.14657000 | 2.12876100  |
| O | 0.72075300  | -0.28022800 | 3.30401900  |
| O | 1.64666400  | -1.11033400 | 1.11895700  |
| C | 0.62007300  | -2.88803300 | 2.80235200  |
| F | -0.32108500 | -3.05813400 | 3.74349200  |
| F | 1.81906000  | -3.10482200 | 3.35258800  |
| F | 0.41829700  | -3.77673500 | 1.82712400  |
| C | -1.93088100 | 2.96316700  | -2.31099000 |
| C | -1.08239800 | 2.62113700  | -3.37347600 |
| C | -3.27474600 | 2.56376900  | -2.40629500 |
| C | -1.55207800 | 1.91575900  | -4.48371300 |
| H | -0.03244000 | 2.89114200  | -3.35289100 |
| C | -3.74656000 | 1.85667100  | -3.51085800 |
| H | -3.97609400 | 2.79686200  | -1.61294000 |
| C | -2.88780200 | 1.52890400  | -4.56025600 |
| H | -0.86623600 | 1.67118400  | -5.29086000 |
| H | -4.79189600 | 1.56084700  | -3.54530100 |
| H | -3.25340500 | 0.97811300  | -5.42255700 |
| C | -1.97837700 | 5.29764600  | -1.33008600 |
| H | -3.06252800 | 5.22473400  | -1.46566500 |
| H | -1.81578700 | 5.83709400  | -0.39104900 |
| C | -0.55423400 | 3.21522500  | 2.33064800  |
| H | -0.39420200 | 3.70742200  | 3.29466100  |



|   |             |            |             |
|---|-------------|------------|-------------|
| H | -0.82209600 | 2.16983500 | 2.52757000  |
| H | 0.40958700  | 3.19243300 | 1.80859700  |
| C | -1.37948600 | 6.10866000 | -2.47079900 |
| C | -1.78713000 | 5.96866400 | -3.73753500 |
| H | -2.55799200 | 5.25796900 | -4.01926600 |
| H | -1.36252100 | 6.56815900 | -4.53966400 |
| C | -0.34488900 | 7.14612700 | -2.09462600 |
| H | -0.77706700 | 7.89931400 | -1.42153700 |
| H | 0.50617100  | 6.71057700 | -1.55238500 |
| H | 0.04710300  | 7.66520300 | -2.97485800 |

INT-14欵?3

0 imaginary frequency

H = -5315.367434

G = -5315.571431

E(M06-2X-DCM) = -5316.263663

|   |             |             |             |
|---|-------------|-------------|-------------|
| O | 0.80074900  | -2.01024300 | 1.61154300  |
| O | 2.79757700  | -0.88059200 | 0.38882200  |
| P | 1.16382100  | -0.94612500 | 0.41278300  |
| O | 0.66389200  | 0.43427000  | 0.72231200  |
| C | 1.84404100  | -0.81773100 | 5.48921900  |
| C | 2.78363200  | -1.40189900 | 4.64584400  |
| C | 2.40365500  | -1.88239400 | 3.38431000  |
| C | 0.12019800  | -1.11577400 | 3.77149400  |
| C | 0.52061300  | -0.71887100 | 5.06069200  |
| C | 3.55033600  | -2.04499900 | 0.19998600  |
| C | 3.77050600  | -2.89701000 | 1.28431700  |
| C | 4.39488600  | -4.13588500 | 1.06671400  |
| C | 4.88452300  | -4.47643400 | -0.18856900 |
| C | 4.76420500  | -3.55785200 | -1.22904100 |
| C | 4.09713900  | -2.33165300 | -1.06726100 |
| H | -0.23065200 | -0.30587300 | 5.72729400  |
| H | 5.18136200  | -3.78770400 | -2.20497000 |
| C | 3.53709200  | -2.70126200 | 2.78073300  |
| C | 4.76717000  | -2.02022200 | 3.47005300  |
| H | 5.02945300  | -1.11600000 | 2.90863900  |
| H | 5.64840000  | -2.66896800 | 3.48812000  |
| H | 5.43350600  | -4.97598400 | 2.77423200  |
| H | 4.13147300  | -5.99722100 | 2.17324400  |
| C | 1.10659000  | -1.66203500 | 2.92613300  |
| H | 2.12672600  | -0.45669500 | 6.47489700  |
| H | 5.36842600  | -5.43520100 | -0.35698500 |
| C | 4.26156400  | -1.63262300 | 4.87812200  |
| H | 4.76633100  | -0.74611600 | 5.27895300  |

|   |              |              |              |
|---|--------------|--------------|--------------|
| H | 4. 42867000  | -2. 44295100 | 5. 60145800  |
| C | 4. 42460400  | -4. 95412200 | 2. 33840400  |
| C | 3. 43595600  | -4. 19414200 | 3. 24525800  |
| H | 2. 41610400  | -4. 55002600 | 3. 05913200  |
| H | 3. 64150800  | -4. 31359500 | 4. 31355900  |
| C | 4. 09060100  | -1. 38612600 | -2. 22963900 |
| C | 3. 36815500  | -1. 70559100 | -3. 40414400 |
| C | 4. 94084800  | -0. 25231600 | -2. 20302300 |
| C | 2. 48763200  | -2. 83097500 | -3. 48753200 |
| C | 3. 50555800  | -0. 87240900 | -4. 57779400 |
| C | 5. 05618900  | 0. 58163100  | -3. 37883300 |
| C | 1. 80764200  | -3. 11855200 | -4. 64107100 |
| H | 2. 33341100  | -3. 43918400 | -2. 60595400 |
| C | 2. 78515400  | -1. 21399200 | -5. 76518400 |
| C | 4. 34187900  | 0. 24587700  | -4. 53283500 |
| C | 1. 96263100  | -2. 30676600 | -5. 80036100 |
| H | 1. 12340500  | -3. 96143800 | -4. 66399100 |
| H | 2. 90501100  | -0. 57893000 | -6. 64000100 |
| H | 4. 44462300  | 0. 86815000  | -5. 41990700 |
| H | 1. 41475400  | -2. 55257700 | -6. 70609000 |
| C | -1. 32035100 | -0. 98744900 | 3. 38940500  |
| C | -1. 94261800 | 0. 28695500  | 3. 39677800  |
| C | -2. 09280100 | -2. 14866900 | 3. 13034800  |
| C | -1. 22188300 | 1. 50522500  | 3. 62339800  |
| C | -3. 36693000 | 0. 39151400  | 3. 16881900  |
| C | -3. 50607800 | -2. 02135200 | 2. 85470300  |
| C | -1. 86027100 | 2. 71856400  | 3. 67619700  |
| H | -0. 14745100 | 1. 45758700  | 3. 75404700  |
| C | -3. 99638900 | 1. 67580600  | 3. 24014700  |
| C | -4. 10663900 | -0. 76041900 | 2. 89010900  |
| C | -3. 26995500 | 2. 80943600  | 3. 49268800  |
| H | -1. 28549400 | 3. 62127600  | 3. 86787000  |
| H | -5. 07425600 | 1. 72555400  | 3. 10094800  |
| H | -5. 17384800 | -0. 67326300 | 2. 69805300  |
| H | -3. 76286600 | 3. 77590200  | 3. 55690200  |
| C | 6. 56403300  | 1. 19257800  | -1. 07875500 |
| H | 7. 16081300  | 1. 42863100  | -0. 20168200 |
| C | 5. 74095300  | 0. 09601900  | -1. 06710700 |
| H | 5. 69633500  | -0. 53106900 | -0. 18392800 |
| C | 6. 65103500  | 2. 02576000  | -2. 22994000 |
| H | 7. 30598000  | 2. 89288700  | -2. 22008800 |
| C | 5. 91876400  | 1. 72239800  | -3. 34586700 |
| H | 5. 98470700  | 2. 34137000  | -4. 23786500 |
| C | -2. 31902000 | -4. 57159200 | 2. 89949600  |

|   |             |             |             |
|---|-------------|-------------|-------------|
| H | -1.87258700 | -5.56189900 | 2.92509100  |
| C | -3.70285400 | -4.43567300 | 2.59619000  |
| H | -4.29828900 | -5.31991700 | 2.38609600  |
| C | -4.27672800 | -3.19409800 | 2.58123200  |
| H | -5.33575200 | -3.07373100 | 2.36584100  |
| C | -1.54592400 | -3.47111400 | 3.16058800  |
| H | -0.49728600 | -3.60067600 | 3.39912500  |
| C | 1.20475800  | 4.13095800  | 0.29031700  |
| C | 1.78929700  | 3.30155700  | -0.88527400 |
| H | 2.87330400  | 3.46992900  | -0.93119900 |
| H | 1.69813400  | 2.24677300  | -0.60543100 |
| C | 1.21457700  | 3.44527800  | -2.29047900 |
| C | -0.35043300 | 4.02292900  | 0.28471200  |
| H | -0.73505300 | 4.66918300  | -0.50498400 |
| H | -0.75564200 | 4.36989200  | 1.24088600  |
| N | -0.87754900 | 2.66763200  | 0.04750500  |
| C | -2.07863000 | 2.43378400  | -0.45070400 |
| N | -2.53194200 | 1.18403700  | -0.60913600 |
| C | -3.83786200 | 0.78496000  | -1.03523900 |
| C | -4.95234800 | 1.08067000  | -0.24926100 |
| C | -3.96810400 | 0.01378500  | -2.19474600 |
| C | -6.21272500 | 0.62790600  | -0.64275000 |
| C | -5.23423200 | -0.43535500 | -2.57061000 |
| H | -3.08843000 | -0.25050800 | -2.77314300 |
| C | -6.36054000 | -0.12763600 | -1.80419400 |
| H | -7.33914600 | -0.47962200 | -2.10694100 |
| C | -5.38009800 | -1.31022400 | -3.79304800 |
| C | -7.40436800 | 0.98762600  | 0.20536600  |
| F | -5.19849700 | -2.61127600 | -3.49219500 |
| F | -4.48405100 | -0.98443500 | -4.74418900 |
| F | -6.61466800 | -1.19412500 | -4.33432800 |
| F | -7.14739900 | 0.79287000  | 1.52426800  |
| F | -8.49219700 | 0.25994300  | -0.10727900 |
| F | -7.73347900 | 2.29174800  | 0.06732600  |
| S | -3.05273200 | 3.84288700  | -0.91980300 |
| H | -4.82567300 | 1.63755700  | 0.67253000  |
| H | -1.91721900 | 0.37666900  | -0.39480100 |
| H | -0.31869700 | 1.84540200  | 0.34659400  |
| C | 0.63151600  | 4.54111600  | -2.79332900 |
| H | 0.51400200  | 5.46368800  | -2.23566600 |
| H | -4.02853000 | 3.12021100  | -1.50196300 |
| H | 0.26555000  | 4.55118900  | -3.81738400 |
| N | 0.75001200  | -1.68468100 | -0.96187800 |
| S | -0.74783100 | -1.94821800 | -1.38905100 |

|   |             |             |             |
|---|-------------|-------------|-------------|
| O | -0.99713500 | -1.64615300 | -2.80526000 |
| O | -1.75476900 | -1.42709800 | -0.41829600 |
| C | -0.92799100 | -3.80356800 | -1.25390000 |
| F | -0.08163900 | -4.41441500 | -2.09626300 |
| F | -2.17782900 | -4.15221600 | -1.57572100 |
| F | -0.66562700 | -4.21065300 | -0.01035600 |
| C | 1.55686400  | 5.63384900  | 0.24184300  |
| C | 0.91031100  | 6.54328900  | 1.09804200  |
| C | 2.56021400  | 6.14419400  | -0.59412600 |
| C | 1.24054300  | 7.89862600  | 1.11091300  |
| H | 0.14199500  | 6.19874900  | 1.78441800  |
| C | 2.89708800  | 7.49905100  | -0.58325500 |
| H | 3.08221500  | 5.48747300  | -1.27962100 |
| C | 2.23940700  | 8.38551900  | 0.26779800  |
| H | 0.71713100  | 8.57141400  | 1.78541400  |
| H | 3.67915500  | 7.85813300  | -1.24708500 |
| H | 2.50130800  | 9.44004400  | 0.27560100  |
| C | 1.72106100  | 3.54541000  | 1.66069200  |
| H | 1.24434000  | 4.13388300  | 2.45356900  |
| H | 1.34897900  | 2.51917300  | 1.75257000  |
| C | 3.22532500  | 3.53899300  | 1.89548300  |
| C | 3.86254900  | 4.61289000  | 2.37659900  |
| H | 3.34535600  | 5.54173700  | 2.59991600  |
| H | 4.93441600  | 4.59914900  | 2.56055600  |
| C | 3.95473700  | 2.24349600  | 1.63512500  |
| H | 5.02241500  | 2.33864800  | 1.85862300  |
| H | 3.54157500  | 1.43557700  | 2.25338500  |
| H | 3.85533300  | 1.90568000  | 0.59842300  |
| C | 1.38902500  | 2.20718000  | -3.13860900 |
| H | 2.44525600  | 1.91684000  | -3.19794500 |
| H | 0.86153000  | 1.34432700  | -2.71069100 |
| H | 1.02213100  | 2.36001000  | -4.15824600 |

INT-14欵?4

O imaginary frequency

H = -5315.366059

G = -5315.569567

E(M06-2X-DCM) = -5316.261914

|   |            |             |            |
|---|------------|-------------|------------|
| O | 0.81241300 | -2.24684200 | 1.34161200 |
| O | 2.81463900 | -0.91873200 | 0.36202900 |
| P | 1.18198600 | -1.00488500 | 0.33079900 |
| O | 0.65591800 | 0.30576000  | 0.83636400 |
| C | 1.80796100 | -1.69438200 | 5.37334800 |
| C | 2.75644300 | -2.14436400 | 4.46075500 |

|   |              |              |              |
|---|--------------|--------------|--------------|
| C | 2. 39481700  | -2. 41169700 | 3. 13228000  |
| C | 0. 11026900  | -1. 69860800 | 3. 60565400  |
| C | 0. 49256900  | -1. 51423200 | 4. 94696800  |
| C | 3. 58522500  | -2. 02621500 | -0. 01038200 |
| C | 3. 79786600  | -3. 05026800 | 0. 91387500  |
| C | 4. 43787100  | -4. 22810800 | 0. 49612800  |
| C | 4. 95301200  | -4. 34022300 | -0. 78993100 |
| C | 4. 83841400  | -3. 25632600 | -1. 65798500 |
| C | 4. 15215400  | -2. 08359700 | -1. 29905000 |
| H | -0. 26624300 | -1. 20404700 | 5. 65926100  |
| H | 5. 27349600  | -3. 31046000 | -2. 65142800 |
| C | 3. 53945900  | -3. 11742500 | 2. 41686900  |
| C | 4. 75764600  | -2. 56386600 | 3. 23091900  |
| H | 5. 02786700  | -1. 57823400 | 2. 83457200  |
| H | 5. 63932400  | -3. 20749700 | 3. 15304200  |
| H | 5. 45104700  | -5. 34962300 | 2. 05138800  |
| H | 4. 16685100  | -6. 25443300 | 1. 25688400  |
| C | 1. 10503000  | -2. 11280300 | 2. 69786000  |
| H | 2. 07790400  | -1. 49908800 | 6. 40819600  |
| H | 5. 45102800  | -5. 25075600 | -1. 11352100 |
| C | 4. 22938900  | -2. 41825900 | 4. 67542700  |
| H | 4. 72911000  | -1. 61528600 | 5. 22936900  |
| H | 4. 38221600  | -3. 34061000 | 5. 25316500  |
| C | 4. 45024800  | -5. 25514700 | 1. 60670800  |
| C | 3. 43977800  | -4. 66822500 | 2. 61360300  |
| H | 2. 42584700  | -4. 99019800 | 2. 34963800  |
| H | 3. 62760500  | -4. 97089900 | 3. 64850900  |
| C | 4. 13659500  | -0. 95232900 | -2. 27995500 |
| C | 3. 46221800  | -1. 09499000 | -3. 51682500 |
| C | 4. 92368700  | 0. 19877600  | -2. 02590000 |
| C | 2. 62970000  | -2. 21972500 | -3. 81870900 |
| C | 3. 59704200  | -0. 07019800 | -4. 52734900 |
| C | 5. 03042400  | 1. 22702600  | -3. 03697400 |
| C | 1. 99778800  | -2. 33354700 | -5. 02859900 |
| H | 2. 47071700  | -2. 97086500 | -3. 05606700 |
| C | 2. 93061700  | -0. 23420000 | -5. 78208400 |
| C | 4. 37483200  | 1. 05976400  | -4. 26039000 |
| C | 2. 15673800  | -1. 33488700 | -6. 03065700 |
| H | 1. 34872200  | -3. 18371100 | -5. 21672700 |
| H | 3. 04999500  | 0. 54335100  | -6. 53320600 |
| H | 4. 47678600  | 1. 82692400  | -5. 02588500 |
| H | 1. 64890800  | -1. 44481400 | -6. 98511700 |
| C | -1. 32358400 | -1. 49726200 | 3. 23082700  |
| C | -1. 93176900 | -0. 23146000 | 3. 42633300  |

|   |             |             |             |
|---|-------------|-------------|-------------|
| C | -2.10512700 | -2.59663100 | 2.79257200  |
| C | -1.19610700 | 0.93203300  | 3.82668100  |
| C | -3.35456200 | -0.07918900 | 3.21833900  |
| C | -3.51665600 | -2.41476500 | 2.53960700  |
| C | -1.82057900 | 2.13164400  | 4.05753900  |
| H | -0.12150500 | 0.85330500  | 3.94066000  |
| C | -3.96960600 | 1.18700800  | 3.48155600  |
| C | -4.10566000 | -1.16891800 | 2.77047900  |
| C | -3.22981400 | 2.26313200  | 3.89531200  |
| H | -1.23601000 | 2.99156300  | 4.37540500  |
| H | -5.04718000 | 1.26857800  | 3.35544900  |
| H | -5.17223400 | -1.04405700 | 2.59698600  |
| H | -3.71151100 | 3.21520600  | 4.10169200  |
| C | 6.42596000  | 1.50629400  | -0.60620300 |
| H | 6.97957900  | 1.61730800  | 0.32230700  |
| C | 5.66650100  | 0.38501700  | -0.81555200 |
| H | 5.62932000  | -0.38587700 | -0.05448800 |
| C | 6.50418000  | 2.52827400  | -1.59436900 |
| H | 7.10868900  | 3.41219500  | -1.40960800 |
| C | 5.82751700  | 2.38572200  | -2.77533900 |
| H | 5.88906200  | 3.15072500  | -3.54620100 |
| C | -2.35092200 | -4.95053600 | 2.18169500  |
| H | -1.91268500 | -5.93600300 | 2.04956000  |
| C | -3.73352200 | -4.75683000 | 1.90503300  |
| H | -4.33623900 | -5.59185800 | 1.55856100  |
| C | -4.29706900 | -3.52365700 | 2.08632800  |
| H | -5.35489500 | -3.36211800 | 1.89308900  |
| C | -1.56912400 | -3.91183600 | 2.61386400  |
| H | -0.52178500 | -4.08614000 | 2.82825900  |
| C | 1.22866200  | 4.04657700  | 0.67748000  |
| C | 1.67475900  | 3.41803300  | -0.67522800 |
| H | 2.73202100  | 3.66042800  | -0.84211100 |
| H | 1.68129000  | 2.33279900  | -0.52122400 |
| C | 0.90689400  | 3.67306800  | -1.96787200 |
| C | -0.31967300 | 3.90692700  | 0.84966400  |
| H | -0.80297700 | 4.67489100  | 0.24676900  |
| H | -0.59255600 | 4.07936500  | 1.89657100  |
| N | -0.87988200 | 2.60642900  | 0.44643900  |
| C | -2.08902300 | 2.44868000  | -0.06198900 |
| N | -2.53897000 | 1.23415800  | -0.40232000 |
| C | -3.84508200 | 0.89249500  | -0.87302300 |
| C | -4.95856900 | 1.06669400  | -0.05000900 |
| C | -3.97560400 | 0.29303800  | -2.13004800 |
| C | -6.21768500 | 0.66701900  | -0.50063100 |

|   |             |             |             |
|---|-------------|-------------|-------------|
| C | -5.24038500 | -0.10639000 | -2.56239700 |
| H | -3.09663700 | 0.12250600  | -2.74370900 |
| C | -6.36557300 | 0.08262400  | -1.75704700 |
| H | -7.34329500 | -0.22887100 | -2.10386600 |
| C | -5.38565200 | -0.79966400 | -3.89620200 |
| C | -7.41001600 | 0.89850500  | 0.39019400  |
| F | -6.62257300 | -0.61563700 | -4.41237500 |
| F | -5.19543200 | -2.12923100 | -3.78354400 |
| F | -4.49452800 | -0.33694300 | -4.79383700 |
| F | -8.48621200 | 0.19347500  | -0.00440400 |
| F | -7.76456900 | 2.20304800  | 0.41277800  |
| F | -7.14143800 | 0.55001800  | 1.67467700  |
| S | -3.08326700 | 3.90259600  | -0.28757300 |
| H | -4.83205300 | 1.48786900  | 0.94097700  |
| H | -1.91238500 | 0.41057400  | -0.33222800 |
| H | -0.32340600 | 1.74697600  | 0.62061800  |
| C | 0.16597500  | 4.75089800  | -2.25812000 |
| H | 0.03174700  | 5.58686700  | -1.58076000 |
| H | -4.04550100 | 3.27622600  | -0.99103900 |
| H | -0.32596900 | 4.83850400  | -3.22403400 |
| N | 0.80903100  | -1.52663300 | -1.15032300 |
| S | -0.67731400 | -1.70366600 | -1.65476300 |
| O | -0.89301200 | -1.15434200 | -3.00074400 |
| O | -1.70942000 | -1.35872300 | -0.63275500 |
| C | -0.85643900 | -3.55333100 | -1.85041200 |
| F | -2.09305800 | -3.83633200 | -2.27267700 |
| F | -0.63920400 | -4.16884100 | -0.68623600 |
| F | 0.02155500  | -4.01221400 | -2.75378600 |
| C | 1.52561200  | 5.55606000  | 0.82486700  |
| C | 1.16457100  | 6.22961800  | 2.00478100  |
| C | 2.15510100  | 6.30837300  | -0.17829700 |
| C | 1.41561700  | 7.59093600  | 2.17505800  |
| H | 0.68988100  | 5.68826500  | 2.81852400  |
| C | 2.41399100  | 7.67047800  | -0.01015400 |
| H | 2.44406500  | 5.83397100  | -1.10884700 |
| C | 2.04451700  | 8.32076400  | 1.16629100  |
| H | 1.12422500  | 8.07797200  | 3.10207200  |
| H | 2.90632900  | 8.22132200  | -0.80734700 |
| H | 2.24545900  | 9.38057900  | 1.29686600  |
| C | 1.89642200  | 3.24029100  | 1.84062400  |
| H | 1.52601200  | 3.64394700  | 2.79552600  |
| H | 1.51041100  | 2.21598000  | 1.79213300  |
| C | 3.41113600  | 3.13241800  | 1.95488300  |
| C | 4.30729600  | 4.01353100  | 1.49923800  |

|   |            |            |             |
|---|------------|------------|-------------|
| H | 4.03819800 | 4.91393400 | 0.96139900  |
| H | 5.36989400 | 3.84907600 | 1.66011200  |
| C | 3.85380600 | 1.89985000 | 2.71027200  |
| H | 4.93505300 | 1.90004900 | 2.88123700  |
| H | 3.35465500 | 1.83180800 | 3.68756500  |
| H | 3.58701800 | 0.99093300 | 2.15646000  |
| C | 1.07934500 | 2.56899800 | -2.98620400 |
| H | 0.66117400 | 1.61746500 | -2.63184000 |
| H | 0.59781100 | 2.81756500 | -3.93699500 |
| H | 2.14173200 | 2.37722300 | -3.18131500 |

INT-14欵?5

0 imaginary frequency

H = -5315.357181

G = -5315.562215

E(M06-2X-DCM) = -5316.249179

|   |            |             |             |
|---|------------|-------------|-------------|
| O | 3.09467600 | -0.44553600 | 1.37258200  |
| O | 3.68183700 | -0.54919000 | -1.14802600 |
| P | 2.60381800 | 0.09885300  | -0.10583500 |
| O | 2.61286800 | 1.57075200  | -0.24814300 |
| C | 6.60849200 | 1.47607200  | 2.58721700  |
| C | 6.66266900 | 0.35588800  | 1.76419600  |
| C | 5.49434900 | -0.35252700 | 1.44574400  |
| C | 4.17722000 | 1.24401500  | 2.73762100  |
| C | 5.37471900 | 1.88439700  | 3.09638800  |
| C | 3.99694200 | -1.90389700 | -1.15342300 |
| C | 4.93909500 | -2.38594600 | -0.24354400 |
| C | 5.19964800 | -3.76431300 | -0.19281900 |
| C | 4.60660400 | -4.63515800 | -1.10018700 |
| C | 3.73624200 | -4.12108100 | -2.05966900 |
| C | 3.39710300 | -2.75779600 | -2.10210700 |
| H | 5.32191200 | 2.73660700  | 3.76782600  |
| H | 3.28374100 | -4.78565400 | -2.78972900 |
| C | 5.85598600 | -1.65083800 | 0.73216300  |
| C | 7.20693200 | -1.22964700 | 0.06353900  |
| H | 6.98672900 | -0.69186300 | -0.86567600 |
| H | 7.83547500 | -2.08987500 | -0.18816800 |
| H | 7.16033500 | -4.29987400 | 0.56232500  |
| H | 5.83686300 | -4.96863200 | 1.51190700  |
| C | 4.26146100 | 0.14353800  | 1.86381100  |
| H | 7.51179200 | 2.02593700  | 2.83972300  |
| H | 4.81749200 | -5.70124000 | -1.06808300 |
| C | 7.86172800 | -0.26779800 | 1.08141000  |
| H | 8.50498100 | 0.47902500  | 0.60192000  |



|   |             |             |             |
|---|-------------|-------------|-------------|
| H | 8.49273900  | -0.81212800 | 1.79814400  |
| C | 6.14946100  | -4.08803500 | 0.93891000  |
| C | 6.12093800  | -2.79165600 | 1.77388200  |
| H | 5.28105300  | -2.82490200 | 2.47745800  |
| H | 7.03451600  | -2.62424200 | 2.35283300  |
| C | 2.44644900  | -2.28520800 | -3.15702200 |
| C | 1.11598800  | -2.77522300 | -3.17541700 |
| C | 2.90085000  | -1.42622800 | -4.18850400 |
| C | 0.58395900  | -3.62459600 | -2.15175600 |
| C | 0.23220800  | -2.40303900 | -4.25700800 |
| C | 1.99637300  | -1.04038600 | -5.24825400 |
| C | -0.69883600 | -4.10242800 | -2.21254000 |
| H | 1.20631700  | -3.86670100 | -1.29918000 |
| C | -1.09852600 | -2.92686200 | -4.28589900 |
| C | 0.69260000  | -1.54237600 | -5.25672400 |
| C | -1.55228100 | -3.76195600 | -3.30047100 |
| H | -1.08169200 | -4.73207800 | -1.41443800 |
| H | -1.74140300 | -2.64815600 | -5.11818500 |
| H | 0.02218800  | -1.26372500 | -6.06788700 |
| H | -2.56256900 | -4.16064400 | -3.33512800 |
| C | 2.88344900  | 1.71593400  | 3.32479700  |
| C | 2.36640800  | 2.98912900  | 2.98538300  |
| C | 2.22810600  | 0.91755000  | 4.29563700  |
| C | 2.96197600  | 3.82492100  | 1.98564700  |
| C | 1.18412700  | 3.48201700  | 3.65605400  |
| C | 1.02792400  | 1.40938400  | 4.93308900  |
| C | 2.45613000  | 5.06623300  | 1.70254300  |
| H | 3.80544300  | 3.44339100  | 1.42441400  |
| C | 0.69367000  | 4.78744400  | 3.33632900  |
| C | 0.54556400  | 2.67882300  | 4.60351400  |
| C | 1.31455700  | 5.56342900  | 2.39500700  |
| H | 2.91469300  | 5.67324400  | 0.92752200  |
| H | -0.18471100 | 5.15026600  | 3.86631700  |
| H | -0.34621600 | 3.05321900  | 5.10332500  |
| H | 0.93632400  | 6.55571400  | 2.16269100  |
| C | 4.65332800  | -0.10675800 | -5.26925000 |
| H | 5.67905200  | 0.25158600  | -5.29185900 |
| C | 4.24424800  | -0.93456000 | -4.25704900 |
| H | 4.95013900  | -1.23107600 | -3.49030100 |
| C | 3.74999900  | 0.29004800  | -6.29577400 |
| H | 4.09112000  | 0.95054000  | -7.08854800 |
| C | 2.46140700  | -0.16973700 | -6.28338500 |
| H | 1.76296600  | 0.11416500  | -7.06750800 |
| C | 2.05988600  | -1.11185200 | 5.65023200  |

|   |             |             |             |
|---|-------------|-------------|-------------|
| H | 2.45505200  | -2.08160100 | 5.94131000  |
| C | 0.86484100  | -0.63165600 | 6.25684400  |
| H | 0.35575700  | -1.23908900 | 7.00056300  |
| C | 0.37015300  | 0.59578100  | 5.90791100  |
| H | -0.53500000 | 0.98150500  | 6.37197600  |
| C | 2.71700300  | -0.36364300 | 4.70863300  |
| H | 3.63017200  | -0.74274800 | 4.26429600  |
| C | -2.14507600 | 3.90692900  | -1.26631200 |
| C | -2.01567600 | 2.85211000  | -2.39623000 |
| H | -1.39907300 | 3.28509800  | -3.19384700 |
| H | -1.39391600 | 2.03834800  | -2.00224000 |
| C | -3.22755100 | 2.20630500  | -3.04907100 |
| C | -3.06882400 | 3.37573800  | -0.11152200 |
| H | -4.10958500 | 3.57897700  | -0.35897800 |
| H | -2.83503200 | 3.90449200  | 0.81767500  |
| N | -2.94771500 | 1.93824300  | 0.16402400  |
| C | -3.94195100 | 1.06758700  | 0.22958600  |
| N | -3.65517700 | -0.24123900 | 0.20223000  |
| C | -4.44412700 | -1.36592400 | 0.54565700  |
| C | -5.30206500 | -1.38872300 | 1.65131900  |
| C | -4.26383800 | -2.52130500 | -0.22452900 |
| C | -6.00753100 | -2.55429300 | 1.94866600  |
| C | -4.96068900 | -3.68379400 | 0.10199600  |
| H | -3.56875000 | -2.50846800 | -1.05852900 |
| C | -5.84433100 | -3.70728900 | 1.18020600  |
| H | -6.38664900 | -4.61170200 | 1.42599500  |
| C | -4.71705600 | -4.92769300 | -0.71795000 |
| C | -6.99017400 | -2.54766800 | 3.09367500  |
| F | -3.49489500 | -5.44742900 | -0.47171600 |
| F | -4.77146600 | -4.65782200 | -2.04264000 |
| F | -5.62546600 | -5.88821200 | -0.46008000 |
| F | -7.14763900 | -3.77567600 | 3.62462900  |
| F | -8.20969800 | -2.12866000 | 2.68396000  |
| F | -6.59773900 | -1.71554400 | 4.08096400  |
| S | -5.60312600 | 1.67766800  | 0.34911000  |
| H | -5.40038000 | -0.52139700 | 2.29310800  |
| H | -2.70263500 | -0.48908600 | -0.16234200 |
| H | -1.99847200 | 1.55849000  | 0.34829300  |
| C | -4.47506700 | 2.69150100  | -3.05043500 |
| H | -4.74666900 | 3.62783900  | -2.57609800 |
| H | -6.18047300 | 0.52187400  | -0.03332600 |
| H | -5.27430300 | 2.16806600  | -3.57039600 |
| N | 1.24444100  | -0.77389200 | -0.36745700 |
| S | -0.16276400 | -0.55501400 | 0.22007300  |

|   |             |             |             |
|---|-------------|-------------|-------------|
| O | -1.23002600 | -0.98355800 | -0.74004500 |
| O | -0.48098500 | 0.74593900  | 0.87913000  |
| C | -0.33955300 | -1.80448900 | 1.60269400  |
| F | 0.50018700  | -1.52832600 | 2.59539000  |
| F | -0.10148000 | -3.03921800 | 1.14988500  |
| F | -1.60288500 | -1.76084600 | 2.07255100  |
| C | -2.73298800 | 5.25754100  | -1.72180400 |
| C | -3.13014200 | 6.21179100  | -0.76813300 |
| C | -2.84483100 | 5.61474900  | -3.07274600 |
| C | -3.62768000 | 7.45925000  | -1.14536500 |
| H | -3.03909300 | 5.99654300  | 0.29289200  |
| C | -3.33951100 | 6.86275100  | -3.45571800 |
| H | -2.55673800 | 4.91315000  | -3.84651200 |
| C | -3.73568900 | 7.79227600  | -2.49555400 |
| H | -3.92522800 | 8.17147600  | -0.38007600 |
| H | -3.41288400 | 7.10470200  | -4.51272800 |
| H | -4.12071000 | 8.76347400  | -2.79411700 |
| C | -0.70962600 | 4.15920000  | -0.65923900 |
| H | -0.83652500 | 4.82802600  | 0.19915400  |
| H | -0.32664800 | 3.21149800  | -0.25851500 |
| C | 0.33767200  | 4.76023900  | -1.59031600 |
| C | 0.45996300  | 6.08797500  | -1.71275700 |
| H | -0.18296000 | 6.78157200  | -1.17755100 |
| H | 1.21359400  | 6.52875800  | -2.36121600 |
| C | 1.28094400  | 3.81804500  | -2.29951000 |
| H | 0.75556400  | 3.11426900  | -2.95746200 |
| H | 1.99880000  | 4.37202300  | -2.91347300 |
| H | 1.83511400  | 3.20425900  | -1.57945700 |
| C | -2.88899900 | 0.92396000  | -3.77729500 |
| H | -3.76648800 | 0.49521000  | -4.27153400 |
| H | -2.12169800 | 1.10210200  | -4.54322300 |
| H | -2.46506800 | 0.17371100  | -3.09689900 |

INT-14欵?6

O imaginary frequency

H = -5315.373266

G = -5315.577182

E(M06-2X-DCM) = -5316.267248

|   |             |             |             |
|---|-------------|-------------|-------------|
| O | -0.40476100 | -2.76218500 | -0.57331900 |
| O | -2.58683800 | -1.38258900 | -0.29132500 |
| P | -0.96277000 | -1.28296500 | -0.13693200 |
| O | -0.48991700 | -0.20382400 | -1.06773000 |
| C | -1.04972000 | -3.88841100 | -4.55674600 |
| C | -2.04444900 | -4.05583200 | -3.59918700 |

|   |             |             |             |
|---|-------------|-------------|-------------|
| C | -1.79195400 | -3.75970500 | -2.25190400 |
| C | 0.46654800  | -3.03848500 | -2.82877800 |
| C | 0.20105400  | -3.41972100 | -4.15668000 |
| C | -3.30483200 | -2.34407400 | 0.42657700  |
| C | -3.35055800 | -3.65694000 | -0.04546500 |
| C | -3.93987400 | -4.65065400 | 0.75278800  |
| C | -4.56770600 | -4.32415800 | 1.94914800  |
| C | -4.61860500 | -2.98763000 | 2.34015100  |
| C | -3.98893600 | -1.97216100 | 1.60082100  |
| H | 0.99792000  | -3.32059700 | -4.88776500 |
| H | -5.14246300 | -2.70925400 | 3.24977400  |
| C | -2.94452400 | -4.25777900 | -1.38908400 |
| C | -4.11709200 | -4.18037800 | -2.42450200 |
| H | -4.49086500 | -3.15043200 | -2.45553300 |
| H | -4.95479500 | -4.83198500 | -2.15709500 |
| H | -4.71403600 | -6.37430400 | -0.31080000 |
| H | -3.44892700 | -6.77385200 | 0.84640600  |
| C | -0.57571700 | -3.18319900 | -1.89245200 |
| H | -1.23416600 | -4.12871500 | -5.60084600 |
| H | -5.02589600 | -5.09309700 | 2.56605600  |
| C | -3.46700500 | -4.54006700 | -3.77904500 |
| H | -3.96826100 | -4.06157800 | -4.62828800 |
| H | -3.49929300 | -5.62287100 | -3.96457600 |
| C | -3.76994300 | -6.01556000 | 0.12307000  |
| C | -2.71375000 | -5.74901600 | -0.96893000 |
| H | -1.70871100 | -5.84078200 | -0.54137400 |
| H | -2.77956700 | -6.43669400 | -1.81779000 |
| C | -4.15136100 | -0.55930700 | 2.07118800  |
| C | -3.56819600 | -0.14555300 | 3.29308000  |
| C | -5.01633100 | 0.31325900  | 1.36409400  |
| C | -2.67160600 | -0.97432200 | 4.04043800  |
| C | -3.86753200 | 1.16652500  | 3.82145500  |
| C | -5.30442500 | 1.62378200  | 1.90335800  |
| C | -2.12535700 | -0.54691200 | 5.22127200  |
| H | -2.39411000 | -1.93931700 | 3.63716400  |
| C | -3.28344900 | 1.56982700  | 5.06298300  |
| C | -4.72661800 | 2.01220200  | 3.11552100  |
| C | -2.44009000 | 0.73804600  | 5.74745700  |
| H | -1.42379900 | -1.18572700 | 5.74945000  |
| H | -3.52271300 | 2.55888400  | 5.44662600  |
| H | -4.95666900 | 2.99500100  | 3.52275200  |
| H | -1.99594800 | 1.05811900  | 6.68616800  |
| C | 1.83685800  | -2.54925500 | -2.48145200 |
| C | 2.34705500  | -1.38549300 | -3.10936100 |

|   |             |             |             |
|---|-------------|-------------|-------------|
| C | 2.66650800  | -3.30816400 | -1.61758100 |
| C | 1.54957100  | -0.54373300 | -3.95180300 |
| C | 3.72557700  | -1.00372200 | -2.90150900 |
| C | 4.02715500  | -2.88288900 | -1.37837300 |
| C | 2.07892500  | 0.55642900  | -4.57586700 |
| H | 0.50246500  | -0.78642900 | -4.08556700 |
| C | 4.24780400  | 0.13713100  | -3.59220800 |
| C | 4.52411900  | -1.75336000 | -2.03418000 |
| C | 3.45226700  | 0.89651100  | -4.40897800 |
| H | 1.44544500  | 1.17633900  | -5.20479100 |
| H | 5.29812900  | 0.38273400  | -3.45396700 |
| H | 5.55422700  | -1.44857400 | -1.86360300 |
| H | 3.86313400  | 1.75628800  | -4.93194200 |
| C | -6.51119500 | 0.80626000  | -0.51048100 |
| H | -6.98877500 | 0.49664400  | -1.43630300 |
| C | -5.66382800 | -0.05342400 | 0.13995500  |
| H | -5.48067600 | -1.03853900 | -0.27357100 |
| C | -6.78306700 | 2.09969000  | 0.02043100  |
| H | -7.46532600 | 2.76492400  | -0.50226800 |
| C | -6.19639800 | 2.49041000  | 1.19521600  |
| H | -6.40947000 | 3.46765200  | 1.62351500  |
| C | 3.05720300  | -5.21853500 | -0.14372600 |
| H | 2.69554200  | -6.12679800 | 0.33069000  |
| C | 4.38622700  | -4.77750200 | 0.11100800  |
| H | 5.02440200  | -5.34726700 | 0.78091700  |
| C | 4.85494700  | -3.64464600 | -0.49599800 |
| H | 5.87214700  | -3.30150900 | -0.32249900 |
| C | 2.23183800  | -4.51360700 | -0.97980800 |
| H | 1.22729200  | -4.87378300 | -1.16655900 |
| C | -1.97118800 | 3.46028900  | -1.12535800 |
| C | -2.05588500 | 3.22479900  | 0.42264700  |
| H | -3.11131100 | 3.29426100  | 0.71018900  |
| H | -1.77404000 | 2.18512000  | 0.61717700  |
| C | -1.24316400 | 4.11459500  | 1.34961200  |
| C | -0.48773200 | 3.50797800  | -1.57100700 |
| H | -0.05796900 | 4.45107000  | -1.23080000 |
| H | -0.42671300 | 3.47225400  | -2.66382100 |
| N | 0.35192100  | 2.42678300  | -1.03310000 |
| C | 1.58410500  | 2.58890700  | -0.58687600 |
| N | 2.26758000  | 1.56084400  | -0.06663200 |
| C | 3.61105300  | 1.57963400  | 0.42602800  |
| C | 4.68111700  | 1.70714200  | -0.45949800 |
| C | 3.83469900  | 1.39123800  | 1.79440000  |
| C | 5.98792500  | 1.66893300  | 0.03165300  |

|   |              |              |              |
|---|--------------|--------------|--------------|
| C | 5. 14626700  | 1. 35209500  | 2. 26739900  |
| H | 2. 99331300  | 1. 26400300  | 2. 46780900  |
| C | 6. 22637800  | 1. 49365000  | 1. 39317000  |
| H | 7. 24106200  | 1. 47259700  | 1. 77198500  |
| C | 5. 40513800  | 1. 10767900  | 3. 73481700  |
| C | 7. 12938900  | 1. 76141500  | -0. 94680300 |
| F | 6. 56296000  | 1. 68522200  | 4. 13037700  |
| F | 5. 50671500  | -0. 20942800 | 4. 00453500  |
| F | 4. 41660500  | 1. 60400800  | 4. 50292500  |
| F | 6. 92226400  | 2. 74008900  | -1. 85522800 |
| F | 7. 27423300  | 0. 60821600  | -1. 64966100 |
| F | 8. 30520000  | 2. 00555300  | -0. 33818600 |
| S | 2. 30787000  | 4. 20703800  | -0. 70390300 |
| H | 4. 49003900  | 1. 81406400  | -1. 52175400 |
| H | 1. 78753700  | 0. 65967600  | 0. 10235400  |
| H | -0. 01713900 | 1. 45263400  | -1. 04579400 |
| C | -0. 37853700 | 3. 56888600  | 2. 21557700  |
| H | -0. 20678500 | 2. 49683800  | 2. 27767900  |
| H | 3. 38005200  | 3. 90958000  | 0. 05401200  |
| H | 0. 16078400  | 4. 18371600  | 2. 93334900  |
| N | -0. 69122100 | -1. 16515800 | 1. 45143200  |
| S | 0. 75409400  | -0. 99887000 | 2. 06925000  |
| O | 0. 80070200  | 0. 01226200  | 3. 13674400  |
| O | 1. 84343300  | -0. 92871900 | 1. 05333300  |
| C | 1. 05321400  | -2. 62548400 | 2. 93972300  |
| F | 0. 98737300  | -3. 63885900 | 2. 07423900  |
| F | 0. 13292000  | -2. 81309600 | 3. 89734400  |
| F | 2. 26386200  | -2. 60932200 | 3. 50642700  |
| C | -2. 66771300 | 4. 77430100  | -1. 54079000 |
| C | -2. 06977200 | 5. 74444300  | -2. 36073500 |
| C | -3. 99098500 | 5. 01226200  | -1. 12705400 |
| C | -2. 75337800 | 6. 90437000  | -2. 73798000 |
| H | -1. 05973700 | 5. 61290000  | -2. 73325300 |
| C | -4. 67501400 | 6. 16755700  | -1. 49941300 |
| H | -4. 50806900 | 4. 27951400  | -0. 51514400 |
| C | -4. 05889900 | 7. 12569100  | -2. 30678300 |
| H | -2. 25645000 | 7. 63240500  | -3. 37400700 |
| H | -5. 69638400 | 6. 31692600  | -1. 15853800 |
| H | -4. 59092300 | 8. 02726500  | -2. 59769600 |
| C | -2. 71524700 | 2. 24795100  | -1. 80441600 |
| H | -2. 25034400 | 1. 32528900  | -1. 44754400 |
| H | -3. 74046300 | 2. 24086100  | -1. 41579800 |
| C | -2. 75230000 | 2. 21016000  | -3. 32416900 |
| C | -1. 86344000 | 1. 47164800  | -4. 00247600 |

|   |             |            |             |
|---|-------------|------------|-------------|
| H | -1.10630300 | 0.88121000 | -3.49420100 |
| H | -1.88891800 | 1.40835400 | -5.08850800 |
| C | -3.85591400 | 2.95356900 | -4.04085700 |
| H | -3.82782700 | 2.75804000 | -5.11788400 |
| H | -4.83793800 | 2.63771200 | -3.66315900 |
| H | -3.79777200 | 4.03618000 | -3.88831200 |
| C | -1.50608000 | 5.60325400 | 1.35698700  |
| H | -1.24464600 | 6.08214400 | 0.40624500  |
| H | -2.57157600 | 5.81429300 | 1.51630800  |
| H | -0.93707900 | 6.09509500 | 2.15239900  |

INT-14欵?7

0 imaginary frequency

H = -5315.368870

G = -5315.572615

E(M06-2X-DCM) = -5316.263912

|   |             |             |             |
|---|-------------|-------------|-------------|
| O | -0.78415900 | -2.08625400 | -1.55596400 |
| O | -2.79434800 | -0.92530400 | -0.38651200 |
| P | -1.15926600 | -0.98113800 | -0.39982600 |
| O | -0.66831300 | 0.39100100  | -0.75569500 |
| C | -1.82005200 | -1.05317200 | -5.48132400 |
| C | -2.75773100 | -1.61402000 | -4.62064700 |
| C | -2.37981600 | -2.04204500 | -3.33990600 |
| C | -0.10334900 | -1.26478800 | -3.74439200 |
| C | -0.50042500 | -0.92210400 | -5.04991400 |
| C | -3.54081700 | -2.08670800 | -0.15617800 |
| C | -3.74959500 | -2.98199400 | -1.20714900 |
| C | -4.36766600 | -4.21514500 | -0.94346200 |
| C | -4.86115600 | -4.50891800 | 0.32211700  |
| C | -4.75186000 | -3.54923700 | 1.32618300  |
| C | -4.09220400 | -2.32606500 | 1.11871700  |
| H | 0.24990800  | -0.52537700 | -5.72739100 |
| H | -5.17258100 | -3.74283900 | 2.30843200  |
| C | -3.51088600 | -2.84341300 | -2.70903100 |
| C | -4.74166000 | -2.19513200 | -3.42797600 |
| H | -5.00744000 | -1.26977400 | -2.90409500 |
| H | -5.62063700 | -2.84721300 | -3.42218500 |
| H | -5.39500100 | -5.12703600 | -2.62045000 |
| H | -4.08948400 | -6.11671300 | -1.97569900 |
| C | -1.08784800 | -1.79080200 | -2.88439500 |
| H | -2.10154500 | -0.73271500 | -6.48129000 |
| H | -5.34000400 | -5.46335600 | 0.52593000  |
| C | -4.23337600 | -1.86187200 | -4.84881500 |
| H | -4.74068900 | -0.99404300 | -5.28565600 |

|   |             |             |             |
|---|-------------|-------------|-------------|
| H | -4.39450000 | -2.70101900 | -5.53998600 |
| C | -4.38781100 | -5.08251600 | -2.18237400 |
| C | -3.40027000 | -4.35264200 | -3.11478100 |
| H | -2.37909900 | -4.69537300 | -2.91189100 |
| H | -3.60151900 | -4.51464400 | -4.17828200 |
| C | -4.09754200 | -1.33270900 | 2.24025700  |
| C | -3.37665100 | -1.59595300 | 3.42951900  |
| C | -4.95542800 | -0.20724600 | 2.16133800  |
| C | -2.49051300 | -2.71178100 | 3.56507200  |
| C | -3.52203300 | -0.71230300 | 4.56453700  |
| C | -5.07745500 | 0.67832000  | 3.29792200  |
| C | -1.81274100 | -2.94456200 | 4.73221600  |
| H | -2.33059300 | -3.35754500 | 2.71162600  |
| C | -2.80355600 | -0.99715100 | 5.76790800  |
| C | -4.36371800 | 0.39881100  | 4.46715000  |
| C | -1.97550900 | -2.08298200 | 5.85386400  |
| H | -1.12441300 | -3.78212800 | 4.79453800  |
| H | -2.92932700 | -0.32459500 | 6.61340300  |
| H | -4.47249800 | 1.05923200  | 5.32551200  |
| H | -1.42921300 | -2.28550400 | 6.77120100  |
| C | 1.33306800  | -1.10236900 | -3.36028700 |
| C | 1.93617400  | 0.18014600  | -3.41055500 |
| C | 2.12151700  | -2.24207500 | -3.05816000 |
| C | 1.19650300  | 1.37900500  | -3.67692900 |
| C | 3.35875000  | 0.31336200  | -3.18718700 |
| C | 3.53258100  | -2.08459000 | -2.78696700 |
| C | 1.81708300  | 2.59901300  | -3.77228600 |
| H | 0.12235400  | 1.31079800  | -3.80136400 |
| C | 3.96902800  | 1.60359400  | -3.30375100 |
| C | 4.11511500  | -0.81730100 | -2.86860300 |
| C | 3.22556300  | 2.71683600  | -3.59447000 |
| H | 1.22910400  | 3.48644700  | -3.99336400 |
| H | 5.04619200  | 1.67419100  | -3.16792200 |
| H | 5.18110300  | -0.70820700 | -2.68110200 |
| H | 3.70403300  | 3.68772700  | -3.69241100 |
| C | -6.59093500 | 1.17057200  | 0.97354700  |
| H | -7.19241100 | 1.35981500  | 0.08832700  |
| C | -5.75832900 | 0.08216900  | 1.01106900  |
| H | -5.70938500 | -0.58477800 | 0.15775800  |
| C | -6.68369900 | 2.05542900  | 2.08502600  |
| H | -7.34567700 | 2.91586200  | 2.03577300  |
| C | -5.94833200 | 1.81001000  | 3.21291100  |
| H | -6.01913900 | 2.46860700  | 4.07571900  |
| C | 2.38110600  | -4.65117900 | -2.73652000 |



|   |              |              |              |
|---|--------------|--------------|--------------|
| H | 1. 94845500  | -5. 64783900 | -2. 72453000 |
| C | 3. 76285900  | -4. 48466900 | -2. 43890200 |
| H | 4. 37049100  | -5. 35205000 | -2. 19595700 |
| C | 4. 31943300  | -3. 23553000 | -2. 47037000 |
| H | 5. 37658900  | -3. 09252900 | -2. 25964500 |
| C | 1. 59297400  | -3. 57216100 | -3. 03894700 |
| H | 0. 54623900  | -3. 72493700 | -3. 27203600 |
| C | -1. 24111500 | 4. 09372300  | -0. 36051800 |
| C | -1. 76877800 | 3. 29836700  | 0. 86389100  |
| H | -2. 85283100 | 3. 45169400  | 0. 94242800  |
| H | -1. 68138700 | 2. 23643300  | 0. 60971000  |
| C | -1. 14198200 | 3. 48115300  | 2. 24084700  |
| C | 0. 31429700  | 3. 99248600  | -0. 42614100 |
| H | 0. 73289800  | 4. 67840600  | 0. 31065300  |
| H | 0. 66997400  | 4. 29605000  | -1. 41636100 |
| N | 0. 86308500  | 2. 65398900  | -0. 14967100 |
| C | 2. 06625700  | 2. 44839400  | 0. 35577500  |
| N | 2. 52881800  | 1. 20828200  | 0. 55777400  |
| C | 3. 83805000  | 0. 83297800  | 0. 99448700  |
| C | 4. 95023900  | 1. 11280800  | 0. 19937200  |
| C | 3. 97442800  | 0. 09904300  | 2. 17722800  |
| C | 6. 21397800  | 0. 68204600  | 0. 60617300  |
| C | 5. 24402300  | -0. 32885500 | 2. 56622500  |
| H | 3. 09684600  | -0. 15296100 | 2. 76428600  |
| C | 6. 36776500  | -0. 03643600 | 1. 79025600  |
| H | 7. 34904500  | -0. 37170100 | 2. 10318400  |
| C | 5. 39655700  | -1. 16443600 | 3. 81501100  |
| C | 7. 40343900  | 1. 02573200  | -0. 25159600 |
| F | 5. 22229200  | -2. 47529800 | 3. 55499300  |
| F | 4. 49959100  | -0. 81464300 | 4. 75676500  |
| F | 6. 63097800  | -1. 02434300 | 4. 35089300  |
| F | 8. 49213400  | 0. 30425200  | 0. 07258100  |
| F | 7. 73306400  | 2. 33220100  | -0. 13919000 |
| F | 7. 14356000  | 0. 80577000  | -1. 56590000 |
| S | 3. 03299400  | 3. 87892500  | 0. 77279600  |
| H | 4. 81936700  | 1. 64024200  | -0. 73890300 |
| H | 1. 91850500  | 0. 38952300  | 0. 37609700  |
| H | 0. 31291400  | 1. 81693800  | -0. 42260200 |
| C | -0. 51416500 | 4. 57752800  | 2. 68580000  |
| H | -0. 39184800 | 5. 47784900  | 2. 09381500  |
| H | 4. 00477500  | 3. 18407900  | 1. 39416400  |
| H | -0. 11331800 | 4. 61285900  | 3. 69613900  |
| N | -0. 74770900 | -1. 66560500 | 1. 00321600  |
| S | 0. 75008700  | -1. 89832500 | 1. 44742700  |

|   |             |             |             |
|---|-------------|-------------|-------------|
| O | 0.99090100  | -1.53550000 | 2.85090100  |
| O | 1.75760100  | -1.40944200 | 0.46042900  |
| C | 0.94565800  | -3.75612000 | 1.38937900  |
| F | 0.09787000  | -4.33887900 | 2.24987000  |
| F | 2.19577900  | -4.08126600 | 1.73400500  |
| F | 0.69583100  | -4.21535100 | 0.16147100  |
| C | -1.59240600 | 5.59619200  | -0.34268600 |
| C | -1.02493300 | 6.46817900  | -1.28915900 |
| C | -2.51564800 | 6.14199900  | 0.56168900  |
| C | -1.35914400 | 7.82174400  | -1.32896400 |
| H | -0.31993700 | 6.09240000  | -2.02536000 |
| C | -2.85811200 | 7.49528400  | 0.52186300  |
| H | -2.96882400 | 5.51361800  | 1.31907500  |
| C | -2.28226100 | 8.34386700  | -0.42283500 |
| H | -0.90029600 | 8.46569600  | -2.07481100 |
| H | -3.57728300 | 7.88381600  | 1.23820500  |
| H | -2.54800800 | 9.39701600  | -0.45256000 |
| C | -1.81929900 | 3.44376800  | -1.67621700 |
| H | -1.35790900 | 3.96778800  | -2.52509100 |
| H | -1.47427100 | 2.40599200  | -1.71138500 |
| C | -3.32813300 | 3.44805600  | -1.86351400 |
| C | -4.05233400 | 2.36308900  | -1.56398100 |
| H | -3.60490700 | 1.46003100  | -1.15951400 |
| H | -5.12967100 | 2.34690500  | -1.71240500 |
| C | -3.97071200 | 4.67370500  | -2.47214900 |
| H | -3.50282300 | 4.92138100  | -3.43539700 |
| H | -5.03868100 | 4.50934400  | -2.64874800 |
| H | -3.86371300 | 5.55978500  | -1.83766800 |
| C | -1.31618700 | 2.27800000  | 3.13860500  |
| H | -0.81433000 | 1.39061400  | 2.73032700  |
| H | -0.92080300 | 2.46125100  | 4.14249500  |
| H | -2.37543400 | 2.00874600  | 3.23370400  |

INT-14欵?8

O imaginary frequency

H = -5315.365957

G = -5315.571067

E(M06-2X-DCM) = -5316.263482

|   |             |             |             |
|---|-------------|-------------|-------------|
| O | -0.60827400 | -2.27252400 | -1.34078100 |
| O | -2.67381700 | -1.07162700 | -0.32522700 |
| P | -1.03936100 | -1.07435000 | -0.30424200 |
| O | -0.58981400 | 0.27292700  | -0.79090000 |
| C | -1.63939600 | -1.68414700 | -5.35806500 |
| C | -2.56147100 | -2.20224200 | -4.45458300 |

|   |             |             |             |
|---|-------------|-------------|-------------|
| C | -2.18356100 | -2.47928900 | -3.13256600 |
| C | 0.06102000  | -1.63959400 | -3.59330600 |
| C | -0.33405900 | -1.44565100 | -4.92953000 |
| C | -3.38650300 | -2.22483500 | 0.02037800  |
| C | -3.54816700 | -3.23725100 | -0.92655300 |
| C | -4.12748200 | -4.45471500 | -0.53408200 |
| C | -4.63517800 | -4.62076500 | 0.74921200  |
| C | -4.57464700 | -3.55184100 | 1.64132700  |
| C | -3.94826000 | -2.33921500 | 1.30759000  |
| H | 0.40547800  | -1.07937400 | -5.63537700 |
| H | -5.00526000 | -3.64963700 | 2.63343900  |
| C | -3.28884300 | -3.25849000 | -2.43099100 |
| C | -4.53553800 | -2.75041300 | -3.23155600 |
| H | -4.85421900 | -1.78859100 | -2.81326400 |
| H | -5.38324600 | -3.43954400 | -3.16652400 |
| H | -5.08369300 | -5.59285400 | -2.11316900 |
| H | -3.75399400 | -6.44760500 | -1.33834100 |
| C | -0.90933900 | -2.12432500 | -2.69425100 |
| H | -1.92180800 | -1.47875900 | -6.38755400 |
| H | -5.08621500 | -5.56223900 | 1.05249300  |
| C | -4.01890200 | -2.54678000 | -4.67325500 |
| H | -4.56041400 | -1.75872900 | -5.20906500 |
| H | -4.12571400 | -3.46312600 | -5.27056000 |
| C | -4.08850800 | -5.45687500 | -1.66667000 |
| C | -3.11046600 | -4.79757900 | -2.66084000 |
| H | -2.08112100 | -5.07296600 | -2.40397700 |
| H | -3.28393800 | -5.08721100 | -3.70194700 |
| C | -3.98181200 | -1.22689100 | 2.30908800  |
| C | -3.28721500 | -1.35347300 | 3.53645600  |
| C | -4.82336200 | -0.10955900 | 2.07903800  |
| C | -2.40285400 | -2.44415900 | 3.81613400  |
| C | -3.45206700 | -0.34409200 | 4.55858400  |
| C | -4.95592900 | 0.90630000  | 3.09911300  |
| C | -1.75104700 | -2.54186100 | 5.01667500  |
| H | -2.22090200 | -3.18025600 | 3.04386900  |
| C | -2.76247200 | -0.49131700 | 5.80305500  |
| C | -4.27591400 | 0.75695300  | 4.31092300  |
| C | -1.93937500 | -1.56023000 | 6.03066700  |
| H | -1.06340400 | -3.36482300 | 5.18803600  |
| H | -2.90461300 | 0.27359800  | 6.56309900  |
| H | -4.39177200 | 1.51745300  | 5.08064100  |
| H | -1.41453100 | -1.65729000 | 6.97725500  |
| C | 1.48401500  | -1.37244200 | -3.21670900 |
| C | 2.02296100  | -0.07101400 | -3.37685800 |

|   |              |              |              |
|---|--------------|--------------|--------------|
| C | 2. 32454400  | -2. 44082800 | -2. 81240200 |
| C | 1. 22451000  | 1. 06331700  | -3. 73851800 |
| C | 3. 43636500  | 0. 15067500  | -3. 16799900 |
| C | 3. 72502300  | -2. 19101300 | -2. 55597800 |
| C | 1. 78160600  | 2. 30203100  | -3. 92927800 |
| H | 0. 15557800  | 0. 93106700  | -3. 85506700 |
| C | 3. 98249400  | 1. 45465700  | -3. 39731300 |
| C | 4. 24571600  | -0. 90914800 | -2. 75145200 |
| C | 3. 18314400  | 2. 50241900  | -3. 77139300 |
| H | 1. 14871600  | 3. 13994100  | -4. 20971700 |
| H | 5. 05493700  | 1. 58875400  | -3. 27439300 |
| H | 5. 30425000  | -0. 73151100 | -2. 57449500 |
| H | 3. 61221900  | 3. 48470900  | -3. 95151400 |
| C | -6. 40368100 | 1. 14426600  | 0. 69420200  |
| H | -6. 98157800 | 1. 23522300  | -0. 22187100 |
| C | -5. 59415100 | 0. 05344900  | 0. 88253800  |
| H | -5. 54046400 | -0. 71191200 | 0. 11671500  |
| C | -6. 50343900 | 2. 15803500  | 1. 68978200  |
| H | -7. 14652700 | 3. 01793700  | 1. 52219400  |
| C | -5. 79971600 | 2. 03566000  | 2. 85739800  |
| H | -5. 87238300 | 2. 79593300  | 3. 63131500  |
| C | 2. 69773800  | -4. 79521900 | -2. 27177400 |
| H | 2. 31325000  | -5. 80625300 | -2. 16830500 |
| C | 4. 06868200  | -4. 53588100 | -1. 99104700 |
| H | 4. 71627300  | -5. 34722800 | -1. 67017000 |
| C | 4. 56468700  | -3. 26927500 | -2. 13608800 |
| H | 5. 61281200  | -3. 05692800 | -1. 93902700 |
| C | 1. 86013900  | -3. 78742900 | -2. 67158900 |
| H | 0. 82265400  | -4. 01077700 | -2. 88896600 |
| C | -1. 59401300 | 3. 89001500  | -0. 60332100 |
| C | -2. 31565000 | 3. 03219200  | 0. 49194500  |
| H | -3. 39393200 | 3. 09636800  | 0. 33014700  |
| H | -2. 05831200 | 1. 98268400  | 0. 32226100  |
| C | -2. 01801000 | 3. 39130300  | 1. 94898300  |
| C | -0. 08425700 | 3. 98214600  | -0. 26534000 |
| H | 0. 02245400  | 4. 52807700  | 0. 67764400  |
| H | 0. 43378300  | 4. 54019400  | -1. 05304200 |
| N | 0. 60157800  | 2. 68337100  | -0. 12472300 |
| C | 1. 84418700  | 2. 58423200  | 0. 31321500  |
| N | 2. 43752000  | 1. 39463200  | 0. 47126600  |
| C | 3. 78245200  | 1. 15445100  | 0. 89696700  |
| C | 4. 85058600  | 1. 50856200  | 0. 07336400  |
| C | 4. 00421600  | 0. 48835100  | 2. 10774900  |
| C | 6. 15633600  | 1. 21767000  | 0. 47598600  |

|   |              |              |              |
|---|--------------|--------------|--------------|
| C | 5. 31367200  | 0. 20230200  | 2. 49194100  |
| H | 3. 16272200  | 0. 18421700  | 2. 72231100  |
| C | 6. 39399600  | 0. 56760900  | 1. 68420400  |
| H | 7. 40735500  | 0. 34575200  | 1. 99553700  |
| C | 5. 56669500  | -0. 55572000 | 3. 77363700  |
| C | 7. 28843000  | 1. 61081100  | -0. 43637500 |
| F | 6. 77601500  | -0. 24484800 | 4. 29489100  |
| F | 5. 55332800  | -1. 88779700 | 3. 56836800  |
| F | 4. 63547800  | -0. 27844600 | 4. 70552200  |
| F | 7. 31341300  | 2. 94727800  | -0. 63939400 |
| F | 7. 15508700  | 1. 03915900  | -1. 66096300 |
| F | 8. 48924400  | 1. 24757000  | 0. 04902900  |
| S | 2. 66345000  | 4. 10521900  | 0. 72229300  |
| H | 4. 65649800  | 1. 98313400  | -0. 88274700 |
| H | 1. 89325100  | 0. 52270400  | 0. 33627000  |
| H | 0. 11468300  | 1. 79973600  | -0. 37873500 |
| C | -2. 46486300 | 4. 51594000  | 2. 52206100  |
| H | -3. 05987500 | 5. 24897600  | 1. 98725200  |
| H | 3. 77968900  | 3. 51825100  | 1. 19485100  |
| H | -2. 25050400 | 4. 73423800  | 3. 56599000  |
| N | -0. 62788900 | -1. 59812900 | 1. 16601200  |
| S | 0. 87422700  | -1. 73324300 | 1. 64168500  |
| O | 1. 08507300  | -1. 24271600 | 3. 01034300  |
| O | 1. 87070100  | -1. 28953300 | 0. 62327800  |
| C | 1. 13690300  | -3. 58026900 | 1. 74959800  |
| F | 0. 29577400  | -4. 11305100 | 2. 64790600  |
| F | 2. 39198500  | -3. 82815900 | 2. 13797500  |
| F | 0. 92340700  | -4. 15576400 | 0. 56455200  |
| C | -2. 16683800 | 5. 32453500  | -0. 66160200 |
| C | -1. 36404000 | 6. 47630000  | -0. 68581500 |
| C | -3. 55812500 | 5. 51824900  | -0. 73654600 |
| C | -1. 91892900 | 7. 75623200  | -0. 77062100 |
| H | -0. 28345000 | 6. 40652500  | -0. 63034600 |
| C | -4. 11670700 | 6. 79221600  | -0. 82099700 |
| H | -4. 22454700 | 4. 66414900  | -0. 72918900 |
| C | -3. 29933100 | 7. 92318400  | -0. 83765700 |
| H | -1. 26142300 | 8. 62175000  | -0. 77898200 |
| H | -5. 19713300 | 6. 89794200  | -0. 87440800 |
| H | -3. 73326800 | 8. 91738700  | -0. 90054800 |
| C | -1. 69263300 | 3. 23502100  | -2. 03779900 |
| H | -1. 09068600 | 3. 87232900  | -2. 69717400 |
| H | -1. 19733200 | 2. 25910800  | -1. 99270900 |
| C | -3. 04523800 | 3. 02743500  | -2. 69677200 |
| C | -3. 47364700 | 3. 86380400  | -3. 65006300 |

|   |             |            |             |
|---|-------------|------------|-------------|
| H | -2.90319300 | 4.74121000 | -3.94408800 |
| H | -4.41653400 | 3.70372700 | -4.16798600 |
| C | -3.83353000 | 1.79310100 | -2.32674000 |
| H | -4.16882400 | 1.80222700 | -1.28370100 |
| H | -4.71957600 | 1.69044900 | -2.96238900 |
| H | -3.22015800 | 0.89042900 | -2.43539700 |
| C | -1.23660300 | 2.37228700 | 2.74531300  |
| H | -1.11175300 | 2.68481500 | 3.78662800  |
| H | -1.74238900 | 1.39955700 | 2.74264800  |
| H | -0.23938200 | 2.19457900 | 2.32461600  |

TS-EF-5S

l imaginary frequency

H = -5315.361134

G = -5315.560682

E(M06-2X-DCM) = -5316.247128

|   |             |             |             |
|---|-------------|-------------|-------------|
| O | -0.63912400 | -2.73118300 | -0.51209100 |
| O | -2.76094800 | -1.23799300 | -0.38120300 |
| P | -1.13219600 | -1.20037900 | -0.20267700 |
| O | -0.61172900 | -0.20648400 | -1.19511800 |
| C | -1.25684100 | -4.09074300 | -4.42457100 |
| C | -2.27036000 | -4.16772800 | -3.47482000 |
| C | -2.02947500 | -3.78789500 | -2.14676900 |
| C | 0.25889600  | -3.16966300 | -2.73226700 |
| C | 0.00041800  | -3.62789500 | -4.03688200 |
| C | -3.53436200 | -2.11361500 | 0.38266700  |
| C | -3.62390300 | -3.45635800 | 0.01147100  |
| C | -4.26999300 | -4.36038600 | 0.87038100  |
| C | -4.91234600 | -3.91647900 | 2.02055900  |
| C | -4.91892800 | -2.55233100 | 2.30564800  |
| C | -4.23001700 | -1.62451900 | 1.50644200  |
| H | 0.80869300  | -3.59406200 | -4.76132800 |
| H | -5.45382000 | -2.18421800 | 3.17614800  |
| C | -3.21387400 | -4.17791400 | -1.27137600 |
| C | -4.36475800 | -4.14089900 | -2.33386500 |
| H | -4.70273400 | -3.10450000 | -2.44994400 |
| H | -5.22930200 | -4.74212800 | -2.03562400 |
| H | -5.08475700 | -6.13577600 | -0.07014500 |
| H | -3.86024800 | -6.48451500 | 1.14553700  |
| C | -0.79997900 | -3.22929600 | -1.80607900 |
| H | -1.43267100 | -4.39440700 | -5.45355600 |
| H | -5.41539300 | -4.61627900 | 2.68302300  |
| C | -3.70382800 | -4.62252500 | -3.64459000 |
| H | -4.17715800 | -4.19738400 | -4.53712700 |

|   |             |             |             |
|---|-------------|-------------|-------------|
| H | -3.76615800 | -5.71510300 | -3.74638000 |
| C | -4.13723700 | -5.77684300 | 0.35583000  |
| C | -3.04846000 | -5.63724300 | -0.72828600 |
| H | -2.05682800 | -5.73039800 | -0.27095200 |
| H | -3.12276400 | -6.38816500 | -1.52091900 |
| C | -4.34314100 | -0.17309000 | 1.85983900  |
| C | -3.79997200 | 0.30458000  | 3.07770800  |
| C | -5.12272100 | 0.68699500  | 1.04510200  |
| C | -2.96402000 | -0.50041900 | 3.91614500  |
| C | -4.07573600 | 1.65842600  | 3.50504800  |
| C | -5.37229700 | 2.04602000  | 1.47356400  |
| C | -2.45881900 | -0.01731000 | 5.09421400  |
| H | -2.69780600 | -1.49509600 | 3.58445100  |
| C | -3.54769800 | 2.11680900  | 4.75429500  |
| C | -4.85274800 | 2.49073700  | 2.69367600  |
| C | -2.76445200 | 1.30346400  | 5.52945500  |
| H | -1.80099900 | -0.64133900 | 5.69143700  |
| H | -3.78615300 | 3.12901500  | 5.07428500  |
| H | -5.07202500 | 3.50405400  | 3.02663300  |
| H | -2.36560600 | 1.66438200  | 6.47375000  |
| C | 1.63410700  | -2.68695300 | -2.39321800 |
| C | 2.17148100  | -1.56311300 | -3.06941500 |
| C | 2.43676400  | -3.41415300 | -1.47850200 |
| C | 1.40239900  | -0.75370200 | -3.96836400 |
| C | 3.55159600  | -1.19033700 | -2.85437100 |
| C | 3.80084600  | -2.99959600 | -1.23929500 |
| C | 1.96240600  | 0.30533500  | -4.63561900 |
| H | 0.35288000  | -0.98342700 | -4.10679700 |
| C | 4.10315200  | -0.08882500 | -3.58414700 |
| C | 4.32542300  | -1.91070900 | -1.94091000 |
| C | 3.33573200  | 0.63816000  | -4.45430600 |
| H | 1.35301900  | 0.89875200  | -5.31247300 |
| H | 5.15193700  | 0.15299300  | -3.42912100 |
| H | 5.35833700  | -1.61323700 | -1.77208800 |
| H | 3.76695800  | 1.46978400  | -5.00524900 |
| C | -6.47239100 | 1.11754200  | -0.94993200 |
| H | -6.90620900 | 0.76825200  | -1.88273600 |
| C | -5.71761300 | 0.26444900  | -0.18753100 |
| H | -5.56640000 | -0.75655400 | -0.51763500 |
| C | -6.70136500 | 2.45876800  | -0.53050800 |
| H | -7.30627600 | 3.11990800  | -1.14495100 |
| C | -6.16996500 | 2.90331600  | 0.65062800  |
| H | -6.35633600 | 3.91849700  | 0.99503300  |
| C | 2.77034200  | -5.25049100 | 0.09987900  |

|   |             |             |             |
|---|-------------|-------------|-------------|
| H | 2.38514900  | -6.12612100 | 0.61556000  |
| C | 4.10345400  | -4.82006100 | 0.35185800  |
| H | 4.72105000  | -5.36430500 | 1.06109300  |
| C | 4.60151500  | -3.72882700 | -0.30592500 |
| H | 5.62125400  | -3.39337200 | -0.13285100 |
| C | 1.97050900  | -4.57631400 | -0.78501500 |
| H | 0.96229200  | -4.92836000 | -0.96858400 |
| C | -1.62386700 | 3.53882700  | -1.09060400 |
| C | -1.64076800 | 3.24337400  | 0.44030100  |
| H | -2.62900300 | 3.50331900  | 0.85022000  |
| H | -1.58086900 | 2.16106300  | 0.60080200  |
| C | -0.65391900 | 3.89267200  | 1.36089200  |
| C | -0.18088500 | 3.32268900  | -1.65326300 |
| H | 0.39816200  | 4.24124100  | -1.60229000 |
| H | -0.24663500 | 3.04807800  | -2.71073600 |
| N | 0.60411400  | 2.30441400  | -0.95654600 |
| C | 1.86679300  | 2.46935100  | -0.52081100 |
| N | 2.50739100  | 1.36595300  | -0.08660600 |
| C | 3.84639500  | 1.32226000  | 0.40444700  |
| C | 4.91088100  | 1.53391400  | -0.46901800 |
| C | 4.08237900  | 0.97897700  | 1.73778100  |
| C | 6.22044300  | 1.39637400  | -0.00848900 |
| C | 5.39775800  | 0.85848800  | 2.18852600  |
| H | 3.24653700  | 0.80877100  | 2.40712000  |
| C | 6.47227500  | 1.06193100  | 1.32077800  |
| H | 7.49035300  | 0.96269800  | 1.67703300  |
| C | 5.66263900  | 0.44699000  | 3.61430300  |
| C | 7.34280900  | 1.53473700  | -1.00001000 |
| F | 5.72090800  | -0.89708200 | 3.74148700  |
| F | 4.69835900  | 0.88463000  | 4.44950700  |
| F | 6.84272400  | 0.93552200  | 4.06074000  |
| F | 7.35122400  | 0.48878800  | -1.87257400 |
| F | 8.55334500  | 1.56530000  | -0.40936100 |
| F | 7.21995800  | 2.65201200  | -1.74708600 |
| S | 2.62869200  | 4.02874700  | -0.42095000 |
| H | 4.71109000  | 1.77712900  | -1.50599800 |
| H | 1.99685000  | 0.47952500  | 0.01190600  |
| H | 0.23741200  | 1.33730100  | -1.01515500 |
| C | 0.07480200  | 5.05104500  | 1.03683200  |
| H | -0.32558500 | 5.69235400  | 0.25239000  |
| H | 1.10559500  | 4.61112600  | 0.47066900  |
| H | 0.51703100  | 5.58825900  | 1.87755600  |
| N | -0.88551100 | -0.97003500 | 1.38184700  |
| S | 0.55736900  | -0.96029100 | 2.03328300  |



|   |             |             |             |
|---|-------------|-------------|-------------|
| O | 0.68843100  | 0.10138600  | 3.04856200  |
| O | 1.67543900  | -1.08861100 | 1.06315900  |
| C | 0.62200000  | -2.55014700 | 3.01490900  |
| F | 0.45644800  | -3.60199600 | 2.21119200  |
| F | -0.34629000 | -2.55976500 | 3.94508800  |
| F | 1.80448400  | -2.64585300 | 3.62844200  |
| C | -0.43097600 | 3.21312400  | 2.66458400  |
| H | 0.20311400  | 3.79554700  | 3.33686200  |
| H | -1.39422500 | 3.01305900  | 3.15495700  |
| H | 0.01374000  | 2.21478400  | 2.52717800  |
| C | -2.63793100 | 2.50411400  | -1.72080200 |
| H | -2.35556800 | 1.50609700  | -1.37322700 |
| H | -3.62322500 | 2.71886300  | -1.29356800 |
| C | -2.74546700 | 2.47216200  | -3.24027100 |
| C | -3.44848700 | 3.38136200  | -3.92637800 |
| H | -3.97035000 | 4.19997700  | -3.44011900 |
| H | -3.53177900 | 3.33000400  | -5.00974200 |
| C | -2.08843700 | 1.30290700  | -3.93737100 |
| H | -1.01972600 | 1.22173000  | -3.70583200 |
| H | -2.53037800 | 0.35793000  | -3.59573300 |
| H | -2.20594600 | 1.36825600  | -5.02414000 |
| C | -2.11732000 | 4.96754600  | -1.40924200 |
| C | -3.26992200 | 5.47360200  | -0.78185300 |
| C | -1.50242400 | 5.78537100  | -2.37086900 |
| C | -3.76476400 | 6.74342000  | -1.07538800 |
| H | -3.81361100 | 4.86525400  | -0.06498400 |
| C | -1.99385700 | 7.05951800  | -2.66727000 |
| H | -0.63483900 | 5.43674200  | -2.91929500 |
| C | -3.12389600 | 7.54977800  | -2.01733400 |
| H | -4.65637600 | 7.10081100  | -0.56668500 |
| H | -1.48873500 | 7.66303500  | -3.41663100 |
| H | -3.50592200 | 8.54081800  | -2.24585500 |

TS-EF-5S-1

l imaginary frequency

H = -5315.354653

G = -5315.555019

E(M06-2X-DCM) = -5316.242912

|   |             |             |             |
|---|-------------|-------------|-------------|
| O | -0.69168700 | -2.45675300 | -1.14695900 |
| O | -2.71362600 | -1.03132000 | -0.34387600 |
| P | -1.07856900 | -1.10861700 | -0.29975000 |
| O | -0.56578000 | 0.14096100  | -0.95549300 |
| C | -1.61467800 | -2.40397900 | -5.23130200 |
| C | -2.57910800 | -2.73962500 | -4.28668900 |

|   |             |             |             |
|---|-------------|-------------|-------------|
| C | -2.23903200 | -2.84089200 | -2.93012600 |
| C | 0.05227600  | -2.17491500 | -3.44805900 |
| C | -0.30755700 | -2.16353300 | -4.80807200 |
| C | -3.48385400 | -2.09290400 | 0.13654200  |
| C | -3.67960900 | -3.21645900 | -0.66959600 |
| C | -4.32463400 | -4.34105700 | -0.12943700 |
| C | -4.85962700 | -4.30954000 | 1.15300700  |
| C | -4.75931400 | -3.13521000 | 1.89590300  |
| C | -4.06969200 | -2.00878800 | 1.41615800  |
| H | 0.46162400  | -1.93621400 | -5.54019100 |
| H | -5.20831600 | -3.07971200 | 2.88314600  |
| C | -3.39514700 | -3.45693700 | -2.15179500 |
| C | -4.59927100 | -3.00295900 | -3.04449400 |
| H | -4.86851800 | -1.97523000 | -2.77459400 |
| H | -5.48541400 | -3.62934900 | -2.90197600 |
| H | -5.31271800 | -5.63498900 | -1.56072600 |
| H | -4.04200900 | -6.44067500 | -0.64661500 |
| C | -0.95751500 | -2.48617900 | -2.51601500 |
| H | -1.86657400 | -2.33933300 | -6.28694700 |
| H | -5.36085500 | -5.17972000 | 1.56921800  |
| C | -4.04964300 | -3.03610000 | -4.48837000 |
| H | -4.53889200 | -2.30559500 | -5.14296600 |
| H | -4.19839000 | -4.02160100 | -4.95153200 |
| C | -4.31895700 | -5.48894300 | -1.11426400 |
| C | -3.29248400 | -5.01995800 | -2.16510600 |
| H | -2.28292100 | -5.30689100 | -1.84939400 |
| H | -3.46302200 | -5.44068400 | -3.16086700 |
| C | -4.07208600 | -0.77734200 | 2.27064600  |
| C | -3.40727300 | -0.78044700 | 3.52127600  |
| C | -4.87518400 | 0.33013200  | 1.89635000  |
| C | -2.55676900 | -1.85325400 | 3.93989200  |
| C | -3.57173000 | 0.33748400  | 4.42435500  |
| C | -5.00840300 | 1.45429500  | 2.79703800  |
| C | -1.93514300 | -1.83405900 | 5.16017100  |
| H | -2.37479700 | -2.67134200 | 3.25572000  |
| C | -2.91827700 | 0.30951800  | 5.69676200  |
| C | -4.36316100 | 1.42316100  | 4.03731000  |
| C | -2.12608500 | -0.74597000 | 6.05827700  |
| H | -1.27003800 | -2.64672100 | 5.43585500  |
| H | -3.06363500 | 1.15225200  | 6.36904600  |
| H | -4.49266100 | 2.25797800  | 4.72422000  |
| H | -1.62860100 | -0.75275800 | 7.02435900  |
| C | 1.47237200  | -1.89570300 | -3.06847100 |
| C | 2.05765900  | -0.64688300 | -3.39845300 |

|   |              |              |              |
|---|--------------|--------------|--------------|
| C | 2. 26215300  | -2. 91023200 | -2. 47026400 |
| C | 1. 31484600  | 0. 43624500  | -3. 97273200 |
| C | 3. 46447600  | -0. 42601100 | -3. 14854900 |
| C | 3. 65536700  | -2. 65496400 | -2. 18146000 |
| C | 1. 91814300  | 1. 61904900  | -4. 31605100 |
| H | 0. 25155300  | 0. 30952500  | -4. 13448700 |
| C | 4. 06060600  | 0. 81640800  | -3. 53770500 |
| C | 4. 22101400  | -1. 42711400 | -2. 53449300 |
| C | 3. 31432300  | 1. 81223200  | -4. 10934200 |
| H | 1. 32652700  | 2. 41762000  | -4. 75678700 |
| H | 5. 12691800  | 0. 94611600  | -3. 36886400 |
| H | 5. 27267500  | -1. 24327700 | -2. 32530600 |
| H | 3. 78066300  | 2. 74791700  | -4. 40643200 |
| C | -6. 40025800 | 1. 45132300  | 0. 34643100  |
| H | -6. 95283900 | 1. 45239200  | -0. 58893000 |
| C | -5. 61265600 | 0. 37683700  | 0. 66968000  |
| H | -5. 54950300 | -0. 46421700 | -0. 01080100 |
| C | -6. 50609600 | 2. 56701700  | 1. 22541200  |
| H | -7. 13852300 | 3. 40877300  | 0. 95528300  |
| C | -5. 82762500 | 2. 56345200  | 2. 41531500  |
| H | -5. 91596100 | 3. 39877100  | 3. 10679700  |
| C | 2. 54130100  | -5. 16544600 | -1. 56983700 |
| H | 2. 12361500  | -6. 14180100 | -1. 33921200 |
| C | 3. 90395300  | -4. 89632800 | -1. 25928900 |
| H | 4. 51165200  | -5. 66414400 | -0. 78835100 |
| C | 4. 44230000  | -3. 67611500 | -1. 56350300 |
| H | 5. 48479500  | -3. 45820800 | -1. 34437200 |
| C | 1. 75301000  | -4. 21061900 | -2. 15636900 |
| H | 0. 72130000  | -4. 44199600 | -2. 39293200 |
| C | -1. 56866100 | 4. 07590200  | -0. 48460100 |
| C | -1. 54762300 | 4. 39882400  | 1. 06896400  |
| H | -1. 24967300 | 5. 44638500  | 1. 17188400  |
| H | -2. 58222400 | 4. 32776700  | 1. 42959800  |
| C | -0. 69870400 | 3. 57966700  | 2. 00265500  |
| C | -0. 11747200 | 3. 80238200  | -0. 96260200 |
| H | 0. 51228000  | 4. 66765000  | -0. 75639300 |
| H | -0. 11318200 | 3. 63773200  | -2. 04333200 |
| N | 0. 53367800  | 2. 63664100  | -0. 35036900 |
| C | 1. 80837900  | 2. 60203400  | 0. 07757600  |
| N | 2. 39777300  | 1. 40588700  | 0. 22378700  |
| C | 3. 73309700  | 1. 20135500  | 0. 70323800  |
| C | 4. 80722700  | 1. 51742800  | -0. 12422700 |
| C | 3. 94525000  | 0. 62036600  | 1. 95432200  |
| C | 6. 10865700  | 1. 24999800  | 0. 30148500  |

|   |             |             |             |
|---|-------------|-------------|-------------|
| C | 5.25351100  | 0.37101700  | 2.37294800  |
| H | 3.10091200  | 0.35708600  | 2.58250200  |
| C | 6.33928400  | 0.67958400  | 1.55188800  |
| H | 7.35038100  | 0.47971400  | 1.88450400  |
| C | 5.48708500  | -0.29112300 | 3.70759900  |
| C | 7.24255600  | 1.53193100  | -0.64574800 |
| F | 6.72638400  | -0.02852900 | 4.18304300  |
| F | 5.37167200  | -1.63339900 | 3.62401900  |
| F | 4.59935500  | 0.12875000  | 4.63246800  |
| F | 7.22670600  | 0.67021500  | -1.70010700 |
| F | 8.44837100  | 1.41340200  | -0.05747900 |
| F | 7.15965400  | 2.77353700  | -1.17056700 |
| S | 2.62590500  | 4.05713700  | 0.59176800  |
| H | 4.62109800  | 1.94805500  | -1.10135500 |
| H | 1.87644100  | 0.53881900  | 0.03989000  |
| H | 0.11494100  | 1.71657600  | -0.58062900 |
| C | 0.37292500  | 4.20411100  | 2.63388600  |
| H | 0.35791900  | 5.29266700  | 2.71029800  |
| H | 1.36450400  | 4.18411600  | 1.69387600  |
| H | 0.85644100  | 3.68955200  | 3.46421500  |
| N | -0.71402000 | -1.43592800 | 1.23852800  |
| S | 0.78038400  | -1.54081600 | 1.75712000  |
| O | 0.97368800  | -0.82179400 | 3.02828500  |
| O | 1.80850600  | -1.32311600 | 0.70665200  |
| C | 0.95766900  | -3.34767400 | 2.20085300  |
| F | 0.74681500  | -4.11289900 | 1.12790600  |
| F | 0.07273700  | -3.68528700 | 3.15208000  |
| F | 2.19029900  | -3.57118800 | 2.66554400  |
| C | -2.10942100 | 5.35904000  | -1.15383400 |
| C | -3.39408900 | 5.81819200  | -0.81252400 |
| C | -1.37804700 | 6.11723100  | -2.07897300 |
| C | -3.92134000 | 6.98261300  | -1.36442300 |
| H | -4.00075000 | 5.25490000  | -0.10925900 |
| C | -1.90634800 | 7.28453000  | -2.63930600 |
| H | -0.38256900 | 5.81525100  | -2.38441200 |
| C | -3.17801500 | 7.72521400  | -2.28428200 |
| H | -4.91800500 | 7.30794600  | -1.07795400 |
| H | -1.31213300 | 7.84725100  | -3.35441500 |
| H | -3.58751200 | 8.63343200  | -2.71773700 |
| C | -2.54206200 | 2.87952100  | -0.79483900 |
| H | -3.41051700 | 2.97756700  | -0.13629300 |
| H | -2.05818500 | 1.93666000  | -0.52114600 |
| C | -3.05679800 | 2.73557200  | -2.21977100 |
| C | -4.35954000 | 2.87943600  | -2.48520200 |

|   |             |            |             |
|---|-------------|------------|-------------|
| H | -4.75424200 | 2.73168900 | -3.48785600 |
| H | -5.07867700 | 3.14129700 | -1.71482000 |
| C | -1.06476300 | 2.17115900 | 2.34009200  |
| H | -0.22172700 | 1.59262500 | 2.72833000  |
| H | -1.82003800 | 2.20732100 | 3.14066500  |
| H | -1.52293000 | 1.62546000 | 1.51562700  |
| C | -2.08607100 | 2.34754100 | -3.30987900 |
| H | -1.44293500 | 3.18920600 | -3.60198500 |
| H | -1.43632900 | 1.52886300 | -2.98090000 |
| H | -2.61898300 | 2.02698300 | -4.21077200 |

TS-EF-5S-2

l imaginary frequency

H = -5315.353530

G = -5315.553736

E(M06-2X-DCM) = -5316.240010

|   |             |             |             |
|---|-------------|-------------|-------------|
| O | -1.08234400 | -2.00554800 | -1.62250200 |
| O | -2.91257600 | -0.68342900 | -0.33594300 |
| P | -1.28880200 | -0.90107200 | -0.42812500 |
| O | -0.69351700 | 0.43189900  | -0.77015100 |
| C | -2.22679400 | -0.81162400 | -5.46688300 |
| C | -3.16106400 | -1.32376600 | -4.57201500 |
| C | -2.75563200 | -1.79937800 | -3.31682500 |
| C | -0.45002600 | -1.16856300 | -3.81679300 |
| C | -0.88248900 | -0.77274000 | -5.09526600 |
| C | -3.75223300 | -1.77061800 | -0.07661500 |
| C | -4.09219300 | -2.63607500 | -1.11821100 |
| C | -4.80231200 | -3.81165000 | -0.82405200 |
| C | -5.25958500 | -4.06545300 | 0.46387500  |
| C | -5.01579900 | -3.12552400 | 1.46389000  |
| C | -4.25714200 | -1.96792400 | 1.22497300  |
| H | -0.13989900 | -0.40811100 | -5.79891700 |
| H | -5.40295900 | -3.28762300 | 2.46556700  |
| C | -3.91368100 | -2.51476500 | -2.63162900 |
| C | -5.12396600 | -1.76956900 | -3.29047000 |
| H | -5.29480800 | -0.83065800 | -2.75092600 |
| H | -6.04895400 | -2.35283300 | -3.24561500 |
| H | -5.97577900 | -4.63292400 | -2.45224600 |
| H | -4.72999400 | -5.72811200 | -1.86251200 |
| C | -1.42773600 | -1.65147200 | -2.92468900 |
| H | -2.53152000 | -0.45544900 | -6.44787400 |
| H | -5.81032600 | -4.97498400 | 0.69006800  |
| C | -4.65954800 | -1.46509400 | -4.73262900 |
| H | -5.12542800 | -0.56252800 | -5.14478700 |

|   |             |             |             |
|---|-------------|-------------|-------------|
| H | -4.91106300 | -2.28802000 | -5.41630600 |
| C | -4.95003900 | -4.67261800 | -2.05914800 |
| C | -3.94652100 | -4.02726400 | -3.03681100 |
| H | -2.94947800 | -4.45370000 | -2.87792200 |
| H | -4.20783600 | -4.17164600 | -4.08978000 |
| C | -4.09638100 | -0.98319700 | 2.34373800  |
| C | -3.31918400 | -1.31144000 | 3.48065000  |
| C | -4.84187900 | 0.22232100  | 2.31563900  |
| C | -2.55038400 | -2.51538800 | 3.56939800  |
| C | -3.28135400 | -0.40591900 | 4.60791400  |
| C | -4.78182800 | 1.12735300  | 3.44201000  |
| C | -1.81512100 | -2.80962800 | 4.68660300  |
| H | -2.52582900 | -3.18214500 | 2.71782600  |
| C | -2.50792800 | -0.75578100 | 5.75908400  |
| C | -4.00419900 | 0.78957100  | 4.55438300  |
| C | -1.79814900 | -1.92477200 | 5.80170400  |
| H | -1.21757700 | -3.71568800 | 4.71174000  |
| H | -2.49752700 | -0.06710500 | 6.60103600  |
| H | -3.98014700 | 1.46339400  | 5.40928600  |
| H | -1.20945900 | -2.17765200 | 6.67940300  |
| C | 1.00505200  | -1.09490900 | -3.47602900 |
| C | 1.67309800  | 0.15579000  | -3.49099500 |
| C | 1.73592600  | -2.28369100 | -3.22430600 |
| C | 0.99711700  | 1.40009600  | -3.71513000 |
| C | 3.10156100  | 0.20777900  | -3.26986700 |
| C | 3.15502100  | -2.20906300 | -2.95984600 |
| C | 1.68169500  | 2.58783900  | -3.77497200 |
| H | -0.07962500 | 1.39204500  | -3.83660700 |
| C | 3.77832200  | 1.46757500  | -3.34021600 |
| C | 3.80058700  | -0.97059100 | -2.99617100 |
| C | 3.09457500  | 2.62661000  | -3.59355300 |
| H | 1.14296400  | 3.51234600  | -3.96887700 |
| H | 4.85677000  | 1.47661600  | -3.19705300 |
| H | 4.87094500  | -0.92035000 | -2.80710100 |
| H | 3.62159600  | 3.57486000  | -3.65598900 |
| C | -6.43286400 | 1.73983800  | 1.24319500  |
| H | -7.08792900 | 1.97603700  | 0.40876800  |
| C | -5.70560400 | 0.57781700  | 1.22980300  |
| H | -5.79200000 | -0.09999100 | 0.38803500  |
| C | -6.34780700 | 2.63955900  | 2.34321500  |
| H | -6.92986900 | 3.55720300  | 2.33612200  |
| C | -5.54533900 | 2.33643300  | 3.40969500  |
| H | -5.48325300 | 3.00587400  | 4.26492100  |
| C | 1.87119600  | -4.71254300 | -2.98762000 |

|   |             |             |             |
|---|-------------|-------------|-------------|
| H | 1.38717400  | -5.68528300 | -3.00581100 |
| C | 3.26212700  | -4.62858100 | -2.69771600 |
| H | 3.82528200  | -5.53423400 | -2.48985900 |
| C | 3.88289300  | -3.40970400 | -2.69071600 |
| H | 4.94707300  | -3.32891000 | -2.48284200 |
| C | 1.13823100  | -3.58410900 | -3.24501900 |
| H | 0.08286400  | -3.67359900 | -3.47329500 |
| C | -0.83422000 | 4.37754600  | -0.01467500 |
| C | -1.16429700 | 4.29662500  | 1.54014000  |
| H | -1.04371100 | 5.29062900  | 1.97338800  |
| H | -2.22638500 | 4.04265100  | 1.62132800  |
| C | -0.40198000 | 3.32247700  | 2.39991200  |
| C | 0.61744600  | 3.90457500  | -0.33554900 |
| H | 1.33997400  | 4.58872500  | 0.10449100  |
| H | 0.74572300  | 3.95379300  | -1.42364600 |
| N | 0.98236400  | 2.54704900  | 0.09043400  |
| C | 2.18891800  | 2.21679000  | 0.58711300  |
| N | 2.58305500  | 0.93759500  | 0.51883600  |
| C | 3.87249900  | 0.46007500  | 0.91861500  |
| C | 4.98172100  | 0.80494500  | 0.15002700  |
| C | 3.99953600  | -0.41176800 | 2.00067700  |
| C | 6.23379000  | 0.27835500  | 0.46635900  |
| C | 5.26132400  | -0.92077600 | 2.31396400  |
| H | 3.12383000  | -0.69953700 | 2.57313300  |
| C | 6.38152000  | -0.58244500 | 1.55224600  |
| H | 7.35381400  | -0.99073400 | 1.79899900  |
| C | 5.40072800  | -1.89877500 | 3.45367600  |
| C | 7.40483700  | 0.65298800  | -0.40060300 |
| F | 6.65844900  | -1.90329100 | 3.95320000  |
| F | 5.12710000  | -3.16120900 | 3.06134700  |
| F | 4.56151500  | -1.60442600 | 4.46715200  |
| F | 7.11286200  | 0.47394600  | -1.71723200 |
| F | 8.50122900  | -0.08124400 | -0.12925600 |
| F | 7.74109700  | 1.95351200  | -0.25877000 |
| S | 3.15484000  | 3.39249700  | 1.44250800  |
| H | 4.85554100  | 1.45915200  | -0.70524000 |
| H | 1.96186900  | 0.20755500  | 0.14278900  |
| H | 0.43127200  | 1.77333900  | -0.31728100 |
| C | 0.67115400  | 3.76963300  | 3.16736900  |
| H | 0.75396600  | 4.84067200  | 3.35835000  |
| H | 1.76083100  | 3.66465500  | 2.35887700  |
| H | 1.01677100  | 3.13204700  | 3.98180300  |
| N | -0.88487000 | -1.65993100 | 0.93652100  |
| S | 0.60804800  | -2.05116700 | 1.29136700  |

|   |             |             |             |
|---|-------------|-------------|-------------|
| O | 0.94944200  | -1.72528500 | 2.68515900  |
| O | 1.60319600  | -1.66814300 | 0.25408200  |
| C | 0.59426800  | -3.91893700 | 1.22551400  |
| F | 0.24215700  | -4.34022300 | 0.00867500  |
| F | -0.27485200 | -4.41344900 | 2.12112500  |
| F | 1.81412700  | -4.38177200 | 1.51449300  |
| C | -0.82538800 | 5.85407600  | -0.49022500 |
| C | -0.11067800 | 6.82743600  | 0.22938800  |
| C | -1.41088300 | 6.25215600  | -1.70099100 |
| C | -0.00585900 | 8.14243000  | -0.22197000 |
| H | 0.38952900  | 6.56265700  | 1.15749300  |
| C | -1.30857000 | 7.56778700  | -2.15836600 |
| H | -1.97630200 | 5.54288800  | -2.29238200 |
| C | -0.60924400 | 8.52145700  | -1.42123500 |
| H | 0.55303500  | 8.86739600  | 0.36368300  |
| H | -1.78363500 | 7.84320400  | -3.09620200 |
| H | -0.53230600 | 9.54527800  | -1.77657200 |
| C | -1.81882300 | 3.48594700  | -0.81367200 |
| H | -1.67814700 | 2.44556500  | -0.49894300 |
| H | -1.49205600 | 3.47385000  | -1.86479600 |
| C | -3.31560600 | 3.74527300  | -0.80120300 |
| C | -3.94086600 | 4.76128300  | -0.19519400 |
| H | -5.02339400 | 4.84925300  | -0.23583400 |
| H | -3.41956500 | 5.54382400  | 0.34544300  |
| C | -0.88426200 | 1.91211700  | 2.51277400  |
| H | -0.12972800 | 1.23522100  | 2.92341800  |
| H | -1.74055500 | 1.90264500  | 3.20613100  |
| H | -1.25038500 | 1.50810400  | 1.56726300  |
| C | -4.09081900 | 2.70511200  | -1.57785700 |
| H | -3.92241000 | 1.70122900  | -1.17023100 |
| H | -5.16484100 | 2.91121100  | -1.56019100 |
| H | -3.76410600 | 2.67785200  | -2.62702200 |

TS-EF-5S-3

l imaginary frequency

H = -5315.358983

G = -5315.559771

E(M06-2X-DCM) = -5316.242884

|   |             |             |             |
|---|-------------|-------------|-------------|
| O | -1.06108500 | -2.54815200 | -0.68477300 |
| O | -2.87756900 | -0.93751400 | 0.24618100  |
| P | -1.26811200 | -1.05045900 | -0.04877600 |
| O | -0.92490700 | 0.04712100  | -1.01259700 |
| C | -2.86319900 | -3.29615500 | -4.38706600 |
| C | -3.58787100 | -3.41230800 | -3.20507700 |



|   |             |             |             |
|---|-------------|-------------|-------------|
| C | -2.95495400 | -3.24494900 | -1.96534600 |
| C | -0.85057700 | -2.75262200 | -3.09882600 |
| C | -1.50016700 | -3.00587000 | -4.32030800 |
| C | -3.50703900 | -1.86242700 | 1.08393900  |
| C | -3.84627200 | -3.12233300 | 0.58618600  |
| C | -4.32784800 | -4.09937700 | 1.47350000  |
| C | -4.56892000 | -3.79599300 | 2.80826700  |
| C | -4.34602500 | -2.49440300 | 3.25408400  |
| C | -3.81126100 | -1.50482800 | 2.41358200  |
| H | -0.91647300 | -2.94976800 | -5.23446100 |
| H | -4.57524000 | -2.22643600 | 4.28135900  |
| C | -3.89276900 | -3.66592800 | -0.84158200 |
| C | -5.27606200 | -3.37843500 | -1.51795700 |
| H | -5.50632600 | -2.31249000 | -1.40719000 |
| H | -6.09195400 | -3.94617700 | -1.05981200 |
| H | -5.57389000 | -5.63866000 | 0.59159200  |
| H | -4.11106400 | -6.26571600 | 1.34422300  |
| C | -1.62288600 | -2.84283900 | -1.92427400 |
| H | -3.34320400 | -3.43991300 | -5.35188000 |
| H | -4.94122100 | -4.55359200 | 3.49319900  |
| C | -5.05886600 | -3.71258800 | -3.01139200 |
| H | -5.69905500 | -3.11871100 | -3.67388500 |
| H | -5.28164200 | -4.76791800 | -3.22243800 |
| C | -4.51009000 | -5.42418200 | 0.76648100  |
| C | -3.75513700 | -5.20044100 | -0.55941200 |
| H | -2.69353300 | -5.43721600 | -0.42456600 |
| H | -4.13154700 | -5.81176200 | -1.38545100 |
| C | -3.68454700 | -0.11290200 | 2.95494000  |
| C | -2.72132000 | 0.18910100  | 3.94638800  |
| C | -4.63779000 | 0.86260800  | 2.56782300  |
| C | -1.74447900 | -0.75969600 | 4.38672200  |
| C | -2.70297300 | 1.50357100  | 4.55014200  |
| C | -4.59874400 | 2.17814800  | 3.16676200  |
| C | -0.82763800 | -0.44100900 | 5.35269600  |
| H | -1.71471400 | -1.73306600 | 3.91588700  |
| C | -1.73426500 | 1.79224300  | 5.56277500  |
| C | -3.63254000 | 2.46308000  | 4.13707700  |
| C | -0.82445900 | 0.84859200  | 5.95628200  |
| H | -0.07926100 | -1.17183100 | 5.64303800  |
| H | -1.74006000 | 2.78213100  | 6.01388600  |
| H | -3.62121600 | 3.44794100  | 4.60119700  |
| H | -0.09037300 | 1.08089000  | 6.72316500  |
| C | 0.61168500  | -2.43767500 | -3.09213100 |
| C | 1.08800100  | -1.28363500 | -3.76462800 |

|   |              |              |              |
|---|--------------|--------------|--------------|
| C | 1. 52790900  | -3. 33338400 | -2. 48522400 |
| C | 0. 21795900  | -0. 32803100 | -4. 38441300 |
| C | 2. 51082100  | -1. 03641500 | -3. 84312900 |
| C | 2. 94463500  | -3. 05062600 | -2. 53450400 |
| C | 0. 71352300  | 0. 74932600  | -5. 07454800 |
| H | -0. 85317800 | -0. 46666700 | -4. 30034700 |
| C | 2. 98545500  | 0. 10584200  | -4. 56212400 |
| C | 3. 39791000  | -1. 91983900 | -3. 22060800 |
| C | 2. 11757000  | 0. 97039900  | -5. 17286000 |
| H | 0. 02714900  | 1. 44312800  | -5. 55426400 |
| H | 4. 05953100  | 0. 26722500  | -4. 61804300 |
| H | 4. 46815400  | -1. 72974400 | -3. 27862800 |
| H | 2. 49322000  | 1. 82664800  | -5. 72673600 |
| C | -6. 61563600 | 1. 54875500  | 1. 30224100  |
| H | -7. 40896100 | 1. 31050200  | 0. 59854100  |
| C | -5. 68891400 | 0. 59380400  | 1. 63244500  |
| H | -5. 75549800 | -0. 39427700 | 1. 19134500  |
| C | -6. 55538700 | 2. 85052000  | 1. 87593100  |
| H | -7. 29636300 | 3. 59618500  | 1. 60036600  |
| C | -5. 57338600 | 3. 15124400  | 2. 78079800  |
| H | -5. 52488100 | 4. 13656900  | 3. 23929600  |
| C | 2. 03129200  | -5. 37670800 | -1. 24344500 |
| H | 1. 69057200  | -6. 28388100 | -0. 75176900 |
| C | 3. 42123500  | -5. 07076600 | -1. 26207500 |
| H | 4. 12673800  | -5. 73820100 | -0. 77499100 |
| C | 3. 86322300  | -3. 94205800 | -1. 89612600 |
| H | 4. 92094100  | -3. 69399300 | -1. 91642500 |
| C | 1. 12057000  | -4. 54114900 | -1. 83422600 |
| H | 0. 06795700  | -4. 79703400 | -1. 81303100 |
| C | -1. 13867600 | 3. 64256600  | -1. 77771500 |
| C | -1. 38833900 | 3. 38910800  | -0. 26883300 |
| H | -2. 36143800 | 3. 81424800  | 0. 01879900  |
| H | -1. 52452100 | 2. 31201000  | -0. 13024500 |
| C | -0. 38376400 | 3. 85723500  | 0. 74717100  |
| C | 0. 31558100  | 3. 16879000  | -2. 15350500 |
| H | 0. 99287300  | 4. 01827200  | -2. 20779100 |
| H | 0. 29629400  | 2. 69877500  | -3. 14250600 |
| N | 0. 91705100  | 2. 19619200  | -1. 23438900 |
| C | 2. 17583700  | 2. 27031200  | -0. 76282300 |
| N | 2. 72874500  | 1. 13491100  | -0. 30537900 |
| C | 4. 00490100  | 0. 94975800  | 0. 30117500  |
| C | 4. 45190900  | 1. 70324800  | 1. 38828500  |
| C | 4. 78255000  | -0. 09966200 | -0. 18948000 |
| C | 5. 70029000  | 1. 42654300  | 1. 94443800  |

|   |             |             |             |
|---|-------------|-------------|-------------|
| C | 6.02259100  | -0.37577100 | 0.38540400  |
| H | 4.40956100  | -0.69716400 | -1.01317600 |
| C | 6.49454200  | 0.39068200  | 1.44905300  |
| H | 7.46039700  | 0.18038600  | 1.89248500  |
| C | 6.82306200  | -1.54288700 | -0.12967900 |
| C | 6.21998800  | 2.28637100  | 3.06722400  |
| F | 6.40839800  | -2.71288500 | 0.40243100  |
| F | 8.13679100  | -1.41881200 | 0.15146500  |
| F | 6.70765100  | -1.66951100 | -1.47702500 |
| F | 6.95693400  | 3.32019200  | 2.59791900  |
| F | 7.01531200  | 1.58714400  | 3.90545500  |
| F | 5.21853700  | 2.81779700  | 3.80040100  |
| S | 3.01534900  | 3.79356600  | -0.68594400 |
| H | 3.83258700  | 2.48574100  | 1.80380400  |
| H | 2.19849800  | 0.25340000  | -0.37646300 |
| H | 0.41924200  | 1.29166700  | -1.16689400 |
| C | 0.46995500  | 4.94625100  | 0.57123600  |
| H | 0.23275700  | 5.67586500  | -0.20050600 |
| H | 1.56928600  | 4.43512400  | 0.01879800  |
| H | 0.92815100  | 5.36046500  | 1.47052200  |
| N | -0.56851800 | -1.10438300 | 1.40528400  |
| S | 0.99280300  | -1.27203900 | 1.61016800  |
| O | 1.51580800  | -0.34913100 | 2.62598600  |
| O | 1.76512200  | -1.38402200 | 0.34001900  |
| C | 1.15676100  | -2.97289000 | 2.36687800  |
| F | 0.50424300  | -3.02690600 | 3.53936000  |
| F | 2.44774600  | -3.23949900 | 2.58603100  |
| F | 0.64953700  | -3.90012200 | 1.55157900  |
| C | -1.31759500 | 5.10593200  | -2.22274300 |
| C | -0.82361400 | 5.51482100  | -3.47450200 |
| C | -2.01710500 | 6.05867000  | -1.46620800 |
| C | -1.01124300 | 6.81392900  | -3.94488200 |
| H | -0.28860900 | 4.80857500  | -4.10315400 |
| C | -2.20819600 | 7.36158600  | -1.93304700 |
| H | -2.42665200 | 5.79539900  | -0.49669500 |
| C | -1.70617900 | 7.74739200  | -3.17492900 |
| H | -0.61370400 | 7.09449800  | -4.91661600 |
| H | -2.75328400 | 8.07354900  | -1.31888300 |
| H | -1.85383100 | 8.76050400  | -3.53819300 |
| C | -2.14121300 | 2.73446200  | -2.59371400 |
| H | -1.89457300 | 2.87337300  | -3.65485500 |
| H | -1.90620900 | 1.69614800  | -2.33942400 |
| C | -3.62868900 | 2.96926000  | -2.39857200 |
| C | -4.32420100 | 2.23569100  | -1.52067800 |

|   |             |            |             |
|---|-------------|------------|-------------|
| H | -3.86238300 | 1.45714600 | -0.91974100 |
| H | -5.39214400 | 2.38143100 | -1.37979000 |
| C | -4.31021700 | 3.98596100 | -3.28599300 |
| H | -4.18042900 | 3.71920900 | -4.34449300 |
| H | -5.38465300 | 4.03180000 | -3.08102100 |
| H | -3.89615000 | 4.99257500 | -3.16591000 |
| C | -0.32945800 | 3.06423100 | 2.01297400  |
| H | -0.02689600 | 2.02479800 | 1.82757400  |
| H | 0.34604400  | 3.49985900 | 2.75293000  |
| H | -1.33529000 | 2.99510000 | 2.45074500  |

TS-EF-5S-4

l imaginary frequency

H = -5315.357088

G = -5315.558341

E(M06-2X-DCM) = -5316.242190

|   |             |             |             |
|---|-------------|-------------|-------------|
| O | -1.09458900 | -2.52706000 | -0.66947000 |
| O | -2.90646700 | -0.89297300 | 0.22811500  |
| P | -1.29598600 | -1.01997500 | -0.05324500 |
| O | -0.93448400 | 0.06387900  | -1.02601400 |
| C | -2.88456500 | -3.31152300 | -4.36992000 |
| C | -3.61522600 | -3.40853100 | -3.18979300 |
| C | -2.98688900 | -3.22865500 | -1.94948500 |
| C | -0.87379900 | -2.76615100 | -3.07931200 |
| C | -1.51979900 | -3.02998700 | -4.30051300 |
| C | -3.54632900 | -1.80145600 | 1.07578900  |
| C | -3.88842500 | -3.06733700 | 0.59562500  |
| C | -4.37834000 | -4.02923400 | 1.49475700  |
| C | -4.62513500 | -3.70493900 | 2.82357400  |
| C | -4.40112700 | -2.39706100 | 3.25034900  |
| C | -3.85868700 | -1.42225200 | 2.39770900  |
| H | -0.93151000 | -2.99035500 | -5.21256900 |
| H | -4.63623800 | -2.11225800 | 4.27177500  |
| C | -3.93113800 | -3.63087500 | -0.82432400 |
| C | -5.31058200 | -3.34744500 | -1.51034900 |
| H | -5.53846600 | -2.27954500 | -1.41329700 |
| H | -6.13025100 | -3.90686700 | -1.04876700 |
| H | -5.62592800 | -5.57712600 | 0.63015700  |
| H | -4.16819200 | -6.19794300 | 1.39757700  |
| C | -1.65240100 | -2.83441700 | -1.90745100 |
| H | -3.36102900 | -3.46465600 | -5.33503500 |
| H | -5.00342400 | -4.45077800 | 3.51804800  |
| C | -5.08825500 | -3.70057000 | -2.99866400 |
| H | -5.72369200 | -3.11298500 | -3.67130000 |

|   |             |             |             |
|---|-------------|-------------|-------------|
| H | -5.31391900 | -4.75764000 | -3.19748100 |
| C | -4.56212900 | -5.36356000 | 0.80614500  |
| C | -3.80105800 | -5.16176900 | -0.51996200 |
| H | -2.74099600 | -5.40101400 | -0.37760900 |
| H | -4.17689400 | -5.78322900 | -1.33867900 |
| C | -3.73571400 | -0.02082300 | 2.91517900  |
| C | -2.77122900 | 0.30410500  | 3.89775900  |
| C | -4.69473600 | 0.94302600  | 2.51290300  |
| C | -1.79471000 | -0.63478100 | 4.35938900  |
| C | -2.75246800 | 1.63220400  | 4.47131800  |
| C | -4.65531000 | 2.27209200  | 3.08136500  |
| C | -0.87682700 | -0.29424200 | 5.31680900  |
| H | -1.76707600 | -1.61931300 | 3.91236100  |
| C | -1.78178200 | 1.94418200  | 5.47532100  |
| C | -3.68402400 | 2.58129200  | 4.03916900  |
| C | -0.87181900 | 1.00949000  | 5.88942000  |
| H | -0.12914900 | -1.01884100 | 5.62392400  |
| H | -1.78706300 | 2.94406600  | 5.90384700  |
| H | -3.67188200 | 3.57672600  | 4.48011400  |
| H | -0.13684800 | 1.25916600  | 6.64997700  |
| C | 0.59169300  | -2.46664700 | -3.06884000 |
| C | 1.08469300  | -1.32741400 | -3.75436300 |
| C | 1.49431600  | -3.36439300 | -2.44467500 |
| C | 0.22905300  | -0.37096000 | -4.39253700 |
| C | 2.51062500  | -1.09702900 | -3.82769400 |
| C | 2.91448600  | -3.09877300 | -2.49052900 |
| C | 0.74034000  | 0.69172700  | -5.09385600 |
| H | -0.84404200 | -0.49704400 | -4.31395600 |
| C | 3.00203200  | 0.03023500  | -4.55894600 |
| C | 3.38421700  | -1.98209800 | -3.18863200 |
| C | 2.14733800  | 0.89598900  | -5.18642600 |
| H | 0.06440000  | 1.38664600  | -5.58645400 |
| H | 4.07813400  | 0.17901800  | -4.61061500 |
| H | 4.45688300  | -1.80498600 | -3.24339200 |
| H | 2.53569200  | 1.74048100  | -5.74951100 |
| C | -6.68474500 | 1.59359500  | 1.24740200  |
| H | -7.48216500 | 1.33722100  | 0.55492300  |
| C | -5.75213600 | 0.64956900  | 1.59193500  |
| H | -5.81779600 | -0.34823200 | 1.17327000  |
| C | -6.62370000 | 2.90863300  | 1.78981300  |
| H | -7.36878800 | 3.64567200  | 1.50245500  |
| C | -5.63516000 | 3.23357100  | 2.67925800  |
| H | -5.58605600 | 4.22957100  | 3.11398800  |
| C | 1.96778400  | -5.39640500 | -1.17271400 |

|   |              |              |              |
|---|--------------|--------------|--------------|
| H | 1. 61403100  | -6. 29274800 | -0. 67049300 |
| C | 3. 36134200  | -5. 10737200 | -1. 18917000 |
| H | 4. 05674300  | -5. 77660500 | -0. 69018600 |
| C | 3. 81953000  | -3. 99263500 | -1. 83628800 |
| H | 4. 88031800  | -3. 75812600 | -1. 85579700 |
| C | 1. 06981500  | -4. 55834200 | -1. 77924500 |
| H | 0. 01426300  | -4. 80187400 | -1. 75988500 |
| C | -1. 04875400 | 3. 64718000  | -1. 82814400 |
| C | -1. 31676800 | 3. 41871300  | -0. 31744800 |
| H | -2. 26957000 | 3. 89142300  | -0. 03710200 |
| H | -1. 48529800 | 2. 34843600  | -0. 16338700 |
| C | -0. 30478700 | 3. 87737200  | 0. 69703000  |
| C | 0. 39732400  | 3. 13461700  | -2. 18161000 |
| H | 1. 09410700  | 3. 96712000  | -2. 24582600 |
| H | 0. 37632600  | 2. 64530200  | -3. 16115400 |
| N | 0. 97066900  | 2. 16938100  | -1. 23690300 |
| C | 2. 23112600  | 2. 22760000  | -0. 76427300 |
| N | 2. 76186100  | 1. 08935500  | -0. 28855600 |
| C | 4. 03260600  | 0. 89064000  | 0. 32459200  |
| C | 4. 48978500  | 1. 65245000  | 1. 40172800  |
| C | 4. 79333700  | -0. 17911900 | -0. 14830900 |
| C | 5. 73154800  | 1. 36241300  | 1. 96572800  |
| C | 6. 02715900  | -0. 46765100 | 0. 43398200  |
| H | 4. 41250900  | -0. 78189800 | -0. 96458600 |
| C | 6. 50928500  | 0. 30597800  | 1. 48775600  |
| H | 7. 47028000  | 0. 08579300  | 1. 93687400  |
| C | 6. 80944400  | -1. 65459900 | -0. 06345000 |
| C | 6. 26276200  | 2. 22947300  | 3. 07755300  |
| F | 6. 36827000  | -2. 81135300 | 0. 47621400  |
| F | 8. 12299800  | -1. 55277500 | 0. 22683000  |
| F | 6. 70189200  | -1. 79161500 | -1. 41045900 |
| F | 7. 01780900  | 3. 24413100  | 2. 59566900  |
| F | 7. 04418900  | 1. 52909200  | 3. 92778300  |
| F | 5. 26832000  | 2. 78767700  | 3. 80040000  |
| S | 3. 09774800  | 3. 73558400  | -0. 71043400 |
| H | 3. 88311700  | 2. 45188500  | 1. 80347700  |
| H | 2. 21627200  | 0. 21621800  | -0. 34972900 |
| H | 0. 45695800  | 1. 27457600  | -1. 16212600 |
| C | 0. 56196300  | 4. 95447300  | 0. 50781200  |
| H | 0. 33081300  | 5. 67509700  | -0. 27459800 |
| H | 1. 65055300  | 4. 42141500  | -0. 02732900 |
| H | 1. 02013500  | 5. 37732900  | 1. 40316100  |
| N | -0. 60731500 | -1. 06262700 | 1. 40674300  |
| S | 0. 94874800  | -1. 25147500 | 1. 62745600  |

|   |             |             |             |
|---|-------------|-------------|-------------|
| O | 1.47878600  | -0.31889100 | 2.63113200  |
| O | 1.73034800  | -1.39794200 | 0.36634100  |
| C | 1.08019600  | -2.94093300 | 2.41516500  |
| F | 0.41702800  | -2.96410100 | 3.58277300  |
| F | 2.36493400  | -3.22332900 | 2.65024400  |
| F | 0.56558200  | -3.87431300 | 1.61168000  |
| C | -1.19506000 | 5.10918300  | -2.29233100 |
| C | -0.61780300 | 5.51407500  | -3.50944600 |
| C | -1.95584200 | 6.06081000  | -1.59706800 |
| C | -0.77545100 | 6.81061600  | -3.99827500 |
| H | -0.03874200 | 4.80816400  | -4.09798200 |
| C | -2.11372900 | 7.36201100  | -2.07971600 |
| H | -2.43895300 | 5.80073800  | -0.66141300 |
| C | -1.52348300 | 7.74579000  | -3.28234600 |
| H | -0.31107100 | 7.08751600  | -4.94100600 |
| H | -2.70618100 | 8.07328800  | -1.51030100 |
| H | -1.64627500 | 8.75756900  | -3.65850600 |
| C | -2.06052100 | 2.76517100  | -2.66169700 |
| H | -1.80901200 | 2.93395900  | -3.71500800 |
| H | -1.83570600 | 1.71659900  | -2.43730300 |
| C | -3.54712800 | 3.01397100  | -2.46856200 |
| C | -4.19678600 | 3.93634800  | -3.18909600 |
| H | -3.69051400 | 4.55811600  | -3.92260100 |
| H | -5.26521100 | 4.10099500  | -3.06976400 |
| C | -4.27638300 | 2.12546700  | -1.48990600 |
| H | -3.90421900 | 2.22738000  | -0.46437800 |
| H | -5.34787800 | 2.34454800  | -1.47407200 |
| H | -4.14085900 | 1.06741400  | -1.74757400 |
| C | -0.26515100 | 3.09934200  | 1.97195300  |
| H | 0.01765800  | 2.05197500  | 1.80052000  |
| H | 0.41782500  | 3.53193300  | 2.70674600  |
| H | -1.27221500 | 3.05443800  | 2.41030600  |

TS-EF-5S-5

l imaginary frequency

H = -5315.360231

G = -5315.558841

E(M06-2X-DCM) = -5316.247651

|   |             |             |             |
|---|-------------|-------------|-------------|
| O | -0.64092400 | -2.71942000 | -0.52705300 |
| O | -2.76702800 | -1.23189300 | -0.39471600 |
| P | -1.13878800 | -1.19236100 | -0.20846700 |
| O | -0.61629500 | -0.18730900 | -1.18807200 |
| C | -1.23737000 | -4.05567900 | -4.45098500 |
| C | -2.25541900 | -4.14003500 | -3.50673400 |

|   |             |             |             |
|---|-------------|-------------|-------------|
| C | -2.02161600 | -3.76807100 | -2.17519800 |
| C | 0.26870300  | -3.14261200 | -2.74561400 |
| C | 0.01721800  | -3.59340100 | -4.05423600 |
| C | -3.54237800 | -2.11451300 | 0.35862800  |
| C | -3.62743000 | -3.45476700 | -0.02242600 |
| C | -4.27619000 | -4.36607600 | 0.82677000  |
| C | -4.92569400 | -3.93156500 | 1.97651300  |
| C | -4.93640200 | -2.56950400 | 2.27123300  |
| C | -4.24483200 | -1.63490200 | 1.48230700  |
| H | 0.82901100  | -3.55394000 | -4.77442600 |
| H | -5.47661800 | -2.20862800 | 3.14148000  |
| C | -3.20936700 | -4.16652700 | -1.30811300 |
| C | -4.35529200 | -4.12469800 | -2.37577200 |
| H | -4.69471100 | -3.08819100 | -2.48660700 |
| H | -5.22008200 | -4.72952900 | -2.08563200 |
| H | -5.08208800 | -6.13668200 | -0.13016300 |
| H | -3.86319900 | -6.49109000 | 1.08951700  |
| C | -0.79469300 | -3.20945900 | -1.82516700 |
| H | -1.40764600 | -4.35336300 | -5.48264800 |
| H | -5.43093100 | -4.63698600 | 2.63129200  |
| C | -3.68717500 | -4.59636100 | -3.68643300 |
| H | -4.15701800 | -4.16612200 | -4.57837200 |
| H | -3.74701900 | -5.68833600 | -3.79584000 |
| C | -4.13758800 | -5.77865200 | 0.30319900  |
| C | -3.04348100 | -5.62919000 | -0.77421300 |
| H | -2.05402700 | -5.72331200 | -0.31239100 |
| H | -3.11199900 | -6.37478400 | -1.57235700 |
| C | -4.36172500 | -0.18641900 | 1.84631000  |
| C | -3.82680200 | 0.28175900  | 3.07158700  |
| C | -5.13704200 | 0.67976700  | 1.03392600  |
| C | -2.99448700 | -0.52911000 | 3.90802300  |
| C | -4.10731100 | 1.63151500  | 3.50884500  |
| C | -5.39135700 | 2.03476600  | 1.47242300  |
| C | -2.49723400 | -0.05553100 | 5.09334300  |
| H | -2.72442500 | -1.52030100 | 3.56914700  |
| C | -3.58773400 | 2.07979400  | 4.76541300  |
| C | -4.88020000 | 2.46986600  | 2.69956600  |
| C | -2.80793100 | 1.26083600  | 5.53828200  |
| H | -1.84182600 | -0.68362700 | 5.68891400  |
| H | -3.82977900 | 3.08876500  | 5.09282200  |
| H | -5.10349700 | 3.47981300  | 3.04001400  |
| H | -2.41574200 | 1.61406300  | 6.48825600  |
| C | 1.64163400  | -2.65982200 | -2.39753700 |
| C | 2.18052200  | -1.53205900 | -3.06598400 |



|   |              |              |              |
|---|--------------|--------------|--------------|
| C | 2. 44136100  | -3. 39083400 | -1. 48329600 |
| C | 1. 41445600  | -0. 71934900 | -3. 96443300 |
| C | 3. 55929100  | -1. 15887900 | -2. 84354800 |
| C | 3. 80415000  | -2. 97617600 | -1. 23684700 |
| C | 1. 97628500  | 0. 34322100  | -4. 62448900 |
| H | 0. 36578800  | -0. 94942300 | -4. 10850200 |
| C | 4. 11272900  | -0. 05316400 | -3. 56538700 |
| C | 4. 33032400  | -1. 88324900 | -1. 93092000 |
| C | 3. 34831900  | 0. 67689100  | -4. 43552800 |
| H | 1. 36918800  | 0. 93908000  | -5. 30124300 |
| H | 5. 16021800  | 0. 18964400  | -3. 40405800 |
| H | 5. 36240400  | -1. 58587800 | -1. 75708200 |
| H | 3. 78078400  | 1. 51195400  | -4. 98022200 |
| C | -6. 47441800 | 1. 12547300  | -0. 96603600 |
| H | -6. 90164900 | 0. 78360000  | -1. 90459500 |
| C | -5. 72327900 | 0. 26695100  | -0. 20612700 |
| H | -5. 56825300 | -0. 75091100 | -0. 54399000 |
| C | -6. 70838500 | 2. 46263100  | -0. 53643300 |
| H | -7. 31079100 | 3. 12794700  | -1. 14881500 |
| C | -6. 18535200 | 2. 89785100  | 0. 65191700  |
| H | -6. 37626200 | 3. 90947200  | 1. 00424800  |
| C | 2. 77111600  | -5. 23527500 | 0. 08653500  |
| H | 2. 38495200  | -6. 11411100 | 0. 59602000  |
| C | 4. 10286500  | -4. 80484900 | 0. 34571600  |
| H | 4. 71853500  | -5. 35241600 | 1. 05408600  |
| C | 4. 60215300  | -3. 70955600 | -0. 30439200 |
| H | 5. 62095900  | -3. 37405200 | -0. 12594000 |
| C | 1. 97382800  | -4. 55716300 | -0. 79767400 |
| H | 0. 96667900  | -4. 90935600 | -0. 98681200 |
| C | -1. 62940300 | 3. 53769900  | -1. 07155300 |
| C | -1. 67250900 | 3. 21321900  | 0. 45383800  |
| H | -2. 65925200 | 3. 49212300  | 0. 85727400  |
| H | -1. 63998000 | 2. 12781400  | 0. 59940200  |
| C | -0. 69090700 | 3. 82852600  | 1. 39704200  |
| C | -0. 17410500 | 3. 33929900  | -1. 60821800 |
| H | 0. 39548800  | 4. 26253700  | -1. 53764400 |
| H | -0. 21699300 | 3. 07392700  | -2. 66936600 |
| N | 0. 60609200  | 2. 32592500  | -0. 90003900 |
| C | 1. 87980500  | 2. 49310100  | -0. 48346100 |
| N | 2. 51439400  | 1. 38440100  | -0. 04775500 |
| C | 3. 85767800  | 1. 32600900  | 0. 42660300  |
| C | 4. 10366800  | 0. 93883900  | 1. 74792000  |
| C | 4. 91547300  | 1. 56201500  | -0. 44727400 |
| C | 5. 42015600  | 0. 79694300  | 2. 18222800  |

|   |              |              |              |
|---|--------------|--------------|--------------|
| C | 6. 22924500  | 1. 40321200  | -0. 00193700 |
| H | 4. 70969400  | 1. 83839800  | -1. 47449600 |
| C | 6. 48980500  | 1. 02312700  | 1. 31175900  |
| H | 7. 51093700  | 0. 89882300  | 1. 65373600  |
| C | 7. 34428500  | 1. 55768500  | -0. 99913700 |
| C | 5. 72761900  | 0. 39197200  | 3. 60058800  |
| F | 7. 35714600  | 0. 51700500  | -1. 87838300 |
| F | 8. 55811300  | 1. 59412200  | -0. 41518000 |
| F | 7. 20796500  | 2. 67842200  | -1. 73813800 |
| F | 6. 47926300  | 1. 33076000  | 4. 22370400  |
| F | 6. 43978800  | -0. 75798000 | 3. 63929600  |
| F | 4. 61624700  | 0. 20848200  | 4. 33652300  |
| S | 2. 64314900  | 4. 04502600  | -0. 40722900 |
| H | 3. 27369300  | 0. 74488000  | 2. 41689200  |
| H | 1. 99631000  | 0. 50387800  | 0. 05877200  |
| H | 0. 24620100  | 1. 35791900  | -0. 96889800 |
| C | 0. 03474800  | 5. 01294200  | 1. 11260300  |
| H | -0. 39175500 | 5. 67586200  | 0. 35959400  |
| H | 1. 04284100  | 4. 62656300  | 0. 56196500  |
| H | 0. 43527000  | 5. 53262600  | 1. 98522600  |
| N | -0. 90195300 | -0. 97455800 | 1. 37992400  |
| S | 0. 53543700  | -0. 97519700 | 2. 04329300  |
| O | 0. 65506000  | 0. 07102200  | 3. 07628700  |
| O | 1. 66209800  | -1. 08623900 | 1. 08161800  |
| C | 0. 59324200  | -2. 57890300 | 3. 00290000  |
| F | -0. 38138300 | -2. 60050700 | 3. 92635600  |
| F | 1. 77142900  | -2. 68398200 | 3. 62301000  |
| F | 0. 43228200  | -3. 61943500 | 2. 18377100  |
| C | -2. 12587000 | 4. 96991100  | -1. 37087600 |
| C | -1. 49342500 | 5. 81355900  | -2. 29813900 |
| C | -3. 29857500 | 5. 45285500  | -0. 76258200 |
| C | -1. 98763600 | 7. 09026200  | -2. 57846800 |
| H | -0. 60935800 | 5. 48399600  | -2. 83170300 |
| C | -3. 79593800 | 6. 72534000  | -1. 03995400 |
| H | -3. 85757500 | 4. 82350800  | -0. 07595100 |
| C | -3. 13756900 | 7. 55750600  | -1. 94671100 |
| H | -1. 46851300 | 7. 71417500  | -3. 30104200 |
| H | -4. 70347100 | 7. 06419200  | -0. 54696800 |
| H | -3. 52151800 | 8. 55059500  | -2. 16272700 |
| C | -2. 62675800 | 2. 51004900  | -1. 73836800 |
| H | -2. 34376900 | 1. 50718100  | -1. 40582900 |
| H | -3. 62074900 | 2. 71072400  | -1. 32440900 |
| C | -2. 70662100 | 2. 50747200  | -3. 25990100 |
| C | -3. 40013200 | 3. 42706400  | -3. 94175700 |

|   |             |            |             |
|---|-------------|------------|-------------|
| H | -3.93386600 | 4.23486200 | -3.45034300 |
| H | -3.46295100 | 3.39567700 | -5.02724700 |
| C | -2.03222900 | 1.35371000 | -3.96601700 |
| H | -2.47857700 | 0.40115300 | -3.65202100 |
| H | -2.12773000 | 1.43972700 | -5.05349300 |
| H | -0.96830300 | 1.27105500 | -3.71408200 |
| C | -0.47516500 | 3.12061400 | 2.68222000  |
| H | -0.02399800 | 2.12719100 | 2.52504300  |
| H | 0.14889100  | 3.68843500 | 3.37561300  |
| H | -1.44204300 | 2.89796500 | 3.15639600  |

TS-EF-5S-6

l imaginary frequency

H = -5315.355636

G = -5315.553336

E(M06-2X-DCM) = -5316.237463

|   |            |             |             |
|---|------------|-------------|-------------|
| O | 0.83954900 | -2.85798200 | -0.07365000 |
| O | 2.59674000 | -1.02469100 | -0.55958900 |
| P | 1.00023100 | -1.23514800 | -0.28078100 |
| O | 0.63436900 | -0.45313200 | 0.93774300  |
| C | 3.05787000 | -4.66006100 | 2.99269100  |
| C | 3.61352700 | -4.46078800 | 1.73363500  |
| C | 2.85086200 | -3.91214800 | 0.69148400  |
| C | 0.95205100 | -3.68964700 | 2.20892100  |
| C | 1.73001500 | -4.29637500 | 3.20998000  |
| C | 3.17614200 | -1.56962100 | -1.70569700 |
| C | 3.50675200 | -2.92282600 | -1.73362100 |
| C | 3.89850200 | -3.50518600 | -2.94919000 |
| C | 4.08963400 | -2.72053600 | -4.08153200 |
| C | 3.89637300 | -1.34135500 | -3.99052100 |
| C | 3.42421800 | -0.73607800 | -2.81430600 |
| H | 1.27682400 | -4.46164900 | 4.18308600  |
| H | 4.09164000 | -0.71017800 | -4.85251200 |
| C | 3.64314100 | -3.94794800 | -0.61130700 |
| C | 5.10519200 | -3.93565000 | -0.04309800 |
| H | 5.38601100 | -2.89943200 | 0.17797500  |
| H | 5.83370400 | -4.33333000 | -0.75626600 |
| H | 5.10763100 | -5.30345600 | -2.80725500 |
| H | 3.55820100 | -5.55842900 | -3.60178900 |
| C | 1.54910300 | -3.48364000 | 0.94979400  |
| H | 3.64585700 | -5.09057200 | 3.79935800  |
| H | 4.40203900 | -3.16692600 | -5.02235300 |
| C | 5.02564400 | -4.74043700 | 1.27035700  |
| H | 5.77883000 | -4.43090100 | 2.00387000  |

|   |             |             |             |
|---|-------------|-------------|-------------|
| H | 5.18078100  | -5.81413900 | 1.09249100  |
| C | 4.05021200  | -5.00409800 | -2.79421800 |
| C | 3.40602000  | -5.26915300 | -1.41402600 |
| H | 2.32693900  | -5.42156400 | -1.53043600 |
| H | 3.81585900  | -6.14740600 | -0.90493200 |
| C | 3.26346500  | 0.75015800  | -2.75482900 |
| C | 2.33421700  | 1.40687400  | -3.59878000 |
| C | 4.11417200  | 1.50875200  | -1.90975600 |
| C | 1.43755200  | 0.70118900  | -4.46465200 |
| C | 2.26224800  | 2.85157100  | -3.59502900 |
| C | 4.00395200  | 2.94968400  | -1.89091400 |
| C | 0.57817900  | 1.36702100  | -5.29828000 |
| H | 1.42423200  | -0.38106100 | -4.43147200 |
| C | 1.35166400  | 3.50819800  | -4.48204500 |
| C | 3.08306400  | 3.58096800  | -2.73145100 |
| C | 0.54161900  | 2.79036800  | -5.32099600 |
| H | -0.09876500 | 0.80339700  | -5.93368100 |
| H | 1.32975800  | 4.59605800  | -4.48166600 |
| H | 3.01058700  | 4.66633400  | -2.71642900 |
| H | -0.13508300 | 3.30136400  | -6.00178800 |
| C | -0.46466700 | -3.32711500 | 2.52863700  |
| C | -0.73318900 | -2.32289600 | 3.49082300  |
| C | -1.52892300 | -4.06897500 | 1.95991700  |
| C | 0.29632900  | -1.52686600 | 4.09190800  |
| C | -2.09673600 | -2.06985000 | 3.89890100  |
| C | -2.88817000 | -3.79727900 | 2.36906500  |
| C | 0.00664400  | -0.58504200 | 5.04612000  |
| H | 1.32138400  | -1.66399700 | 3.76897400  |
| C | -2.35634900 | -1.07522500 | 4.89415900  |
| C | -3.13487900 | -2.80882700 | 3.32563100  |
| C | -1.33780700 | -0.35766000 | 5.45960800  |
| H | 0.80742300  | 0.00720500  | 5.47983000  |
| H | -3.38815800 | -0.90593700 | 5.19421500  |
| H | -4.15886100 | -2.62200900 | 3.64437200  |
| H | -1.54785100 | 0.39196400  | 6.21783600  |
| C | 5.92183600  | 1.67721400  | -0.26993700 |
| H | 6.67437800  | 1.19620800  | 0.34931100  |
| C | 5.11799200  | 0.91596200  | -1.07753300 |
| H | 5.24676000  | -0.15979900 | -1.09711400 |
| C | 5.78450300  | 3.09344400  | -0.23287900 |
| H | 6.42511600  | 3.68150000  | 0.41891500  |
| C | 4.85361700  | 3.70813100  | -1.02559200 |
| H | 4.74086400  | 4.78825800  | -1.01160600 |
| C | -2.36927300 | -5.83640400 | 0.49392600  |

|   |             |             |             |
|---|-------------|-------------|-------------|
| H | -2.18018300 | -6.62708100 | -0.22703100 |
| C | -3.70681800 | -5.56066500 | 0.89643300  |
| H | -4.52500100 | -6.14550300 | 0.48433800  |
| C | -3.95396400 | -4.57078800 | 1.80987200  |
| H | -4.96905300 | -4.36124700 | 2.14057500  |
| C | -1.32137400 | -5.12055100 | 1.01050800  |
| H | -0.30910400 | -5.35225700 | 0.70036400  |
| N | 0.27623200  | -0.94129400 | -1.70460100 |
| S | -1.27835300 | -0.83410800 | -1.90026800 |
| O | -1.64547700 | 0.16481100  | -2.92152300 |
| O | -2.06363700 | -0.77901500 | -0.63288000 |
| C | -1.77809100 | -2.46162000 | -2.67166400 |
| F | -1.10881700 | -2.64300500 | -3.81644700 |
| F | -3.08996500 | -2.44893000 | -2.93691500 |
| F | -1.51075600 | -3.47476100 | -1.84524500 |
| C | -5.13969500 | 1.78806900  | -0.68363400 |
| C | -4.33831300 | 2.32673100  | -1.93196100 |
| H | -5.07783400 | 2.63090100  | -2.69065000 |
| H | -3.79005500 | 1.48965900  | -2.37253100 |
| C | -3.38221800 | 3.48103300  | -1.81716400 |
| C | -4.27400500 | 1.88040200  | 0.60792600  |
| H | -4.43642300 | 2.84608300  | 1.08151900  |
| H | -4.61500300 | 1.13396400  | 1.33149100  |
| N | -2.82606800 | 1.73541800  | 0.41879400  |
| C | -1.89384600 | 2.48435400  | 1.05310700  |
| N | -0.65125300 | 1.97591200  | 1.13991900  |
| C | 0.50563700  | 2.64859800  | 1.63461700  |
| C | 0.94501300  | 3.86164400  | 1.10046000  |
| C | 1.25187100  | 2.01065300  | 2.62552900  |
| C | 2.10923600  | 4.44959100  | 1.59311000  |
| C | 2.42185400  | 2.60409000  | 3.10032400  |
| H | 0.92530300  | 1.04918400  | 3.00228500  |
| C | 2.85472900  | 3.82863900  | 2.59662500  |
| H | 3.76771700  | 4.28171100  | 2.96180200  |
| C | 3.18372700  | 1.90939400  | 4.19788800  |
| C | 2.53699000  | 5.78758900  | 1.05342700  |
| F | 2.54121400  | 2.01821700  | 5.39011900  |
| F | 3.31844000  | 0.58757000  | 3.95682900  |
| F | 4.41927700  | 2.42354700  | 4.36810500  |
| F | 1.88914300  | 6.80583200  | 1.66407400  |
| F | 3.86013700  | 6.00615000  | 1.22172900  |
| F | 2.27465600  | 5.90278300  | -0.27183500 |
| S | -2.27497000 | 4.06224400  | 1.67123900  |
| H | 0.39313300  | 4.33666600  | 0.30001300  |

|   |             |             |             |
|---|-------------|-------------|-------------|
| H | -0.47398600 | 0.96938300  | 0.95664100  |
| H | -2.50807400 | 0.83097300  | 0.03082600  |
| C | -3.59757300 | 4.63560700  | -1.04669600 |
| H | -4.61377300 | 4.87064500  | -0.73700400 |
| H | -3.06254900 | 4.38714500  | 0.08065900  |
| H | -3.01221500 | 5.51181600  | -1.33211400 |
| C | -6.42587300 | 2.66109700  | -0.43516300 |
| H | -7.08076400 | 2.55285600  | -1.30808700 |
| H | -6.12764400 | 3.71272700  | -0.40555100 |
| C | -5.56232600 | 0.34899300  | -1.06050900 |
| C | -5.12794700 | -0.79150500 | -0.37347500 |
| C | -6.40601100 | 0.15474600  | -2.16972600 |
| C | -5.53048500 | -2.07088800 | -0.76669800 |
| H | -4.44470200 | -0.71622500 | 0.46327800  |
| C | -6.81401100 | -1.11773300 | -2.56259000 |
| H | -6.75492800 | 1.00706600  | -2.74700200 |
| C | -6.37979600 | -2.24067400 | -1.85691700 |
| H | -5.15457400 | -2.93262500 | -0.22316000 |
| H | -7.46763200 | -1.22955100 | -3.42371400 |
| H | -6.68936900 | -3.23601400 | -2.16342100 |
| C | -7.23073200 | 2.37690700  | 0.82338000  |
| C | -7.21380500 | 3.24418600  | 1.84336200  |
| H | -6.61952000 | 4.15477700  | 1.81956400  |
| H | -7.79979300 | 3.07709400  | 2.74364100  |
| C | -2.14153500 | 3.37988900  | -2.63827700 |
| H | -2.42751800 | 3.45220200  | -3.70016000 |
| H | -1.43096600 | 4.18400300  | -2.43139500 |
| H | -1.66306900 | 2.39840000  | -2.54691400 |
| C | -8.09313000 | 1.13726500  | 0.86671500  |
| H | -7.49692800 | 0.21918300  | 0.83461500  |
| H | -8.70421200 | 1.11852100  | 1.77436800  |
| H | -8.76535500 | 1.09689000  | -0.00035400 |

TS-EF-5S-7

l imaginary frequency

H = -5315.344227

G = -5315.546295

E(M06-2X-DCM) = -5316.232582

|   |            |             |             |
|---|------------|-------------|-------------|
| O | 2.68528000 | -1.50272000 | 0.87493600  |
| O | 2.05608000 | -0.68020000 | -1.49490500 |
| P | 1.47337600 | -0.79050200 | 0.03738900  |
| O | 1.15580900 | 0.61183300  | 0.46940400  |
| C | 6.46760700 | 0.28214000  | 1.06960600  |
| C | 6.09902000 | -0.47961100 | -0.03419700 |

|   |              |              |              |
|---|--------------|--------------|--------------|
| C | 4. 86036300  | -1. 13878900 | -0. 06820000 |
| C | 4. 30224000  | -0. 18793800 | 2. 11213700  |
| C | 5. 58358300  | 0. 39075000  | 2. 14177600  |
| C | 2. 34204100  | -1. 83456100 | -2. 22423400 |
| C | 3. 54619600  | -2. 50247000 | -2. 00672200 |
| C | 3. 75053400  | -3. 75459400 | -2. 60898400 |
| C | 2. 83002100  | -4. 26489500 | -3. 51733600 |
| C | 1. 69379600  | -3. 51589300 | -3. 82180100 |
| C | 1. 41163900  | -2. 30117200 | -3. 17503100 |
| H | 5. 87343900  | 0. 95312000  | 3. 02427000  |
| H | 0. 98468000  | -3. 88454800 | -4. 55697800 |
| C | 4. 81394200  | -2. 08370200 | -1. 26576400 |
| C | 5. 80519500  | -1. 34991900 | -2. 23280200 |
| H | 5. 26365600  | -0. 54970300 | -2. 75176400 |
| H | 6. 21707400  | -2. 01785700 | -2. 99536800 |
| H | 5. 81955600  | -4. 35535900 | -2. 87965100 |
| H | 4. 90308900  | -5. 43508500 | -1. 83477400 |
| C | 3. 94842000  | -0. 92712400 | 0. 96572700  |
| H | 7. 43438800  | 0. 77810200  | 1. 10638200  |
| H | 2. 99231200  | -5. 22902700 | -3. 99259100 |
| C | 6. 87749200  | -0. 74032800 | -1. 30521800 |
| H | 7. 32746300  | 0. 17027900  | -1. 71760500 |
| H | 7. 70223900  | -1. 44538200 | -1. 13035500 |
| C | 5. 03438700  | -4. 38266000 | -2. 11107000 |
| C | 5. 39589200  | -3. 49131800 | -0. 90296500 |
| H | 4. 88808200  | -3. 86005300 | -0. 00449800 |
| H | 6. 46916900  | -3. 45866100 | -0. 69123200 |
| C | 0. 17176800  | -1. 55010100 | -3. 54616600 |
| C | -1. 10166800 | -2. 13220800 | -3. 32672500 |
| C | 0. 27445800  | -0. 29895900 | -4. 20606200 |
| C | -1. 27617500 | -3. 37426500 | -2. 63557400 |
| C | -2. 29060900 | -1. 45339400 | -3. 79319700 |
| C | -0. 92587300 | 0. 38763100  | -4. 62981000 |
| C | -2. 51801100 | -3. 92425200 | -2. 45846700 |
| H | -0. 40806700 | -3. 86231500 | -2. 21304000 |
| C | -3. 56854500 | -2. 06719600 | -3. 59627200 |
| C | -2. 17204500 | -0. 20991600 | -4. 41921900 |
| C | -3. 68215100 | -3. 27368300 | -2. 95752800 |
| H | -2. 61962200 | -4. 85392500 | -1. 90674300 |
| H | -4. 45276400 | -1. 54889400 | -3. 96026600 |
| H | -3. 07019700 | 0. 30158600  | -4. 76001200 |
| H | -4. 65920000 | -3. 72062500 | -2. 80205200 |
| C | 3. 39829700  | -0. 02282900 | 3. 29151200  |
| C | 3. 01693800  | 1. 27887800  | 3. 70522600  |

|   |             |             |             |
|---|-------------|-------------|-------------|
| C | 2.99838600  | -1.15282200 | 4.04892900  |
| C | 3.36015200  | 2.46306400  | 2.97369300  |
| C | 2.24342100  | 1.44701900  | 4.91511800  |
| C | 2.18201100  | -0.97037800 | 5.22731400  |
| C | 3.02743100  | 3.71217800  | 3.43293000  |
| H | 3.88720200  | 2.36376500  | 2.03219000  |
| C | 1.91462600  | 2.76718400  | 5.35910100  |
| C | 1.83646100  | 0.32043200  | 5.63340200  |
| C | 2.30533100  | 3.87289500  | 4.65030600  |
| H | 3.31231200  | 4.58820700  | 2.85595100  |
| H | 1.35253000  | 2.87142400  | 6.28465800  |
| H | 1.24256800  | 0.45121700  | 6.53586000  |
| H | 2.06304400  | 4.87024300  | 5.00872900  |
| C | 1.59545400  | 1.53706000  | -5.14136600 |
| H | 2.56339800  | 1.98106300  | -5.35762700 |
| C | 1.52943600  | 0.32211400  | -4.50904800 |
| H | 2.44496800  | -0.19157000 | -4.23924100 |
| C | 0.40805100  | 2.22293500  | -5.52566000 |
| H | 0.47844600  | 3.18606100  | -6.02366700 |
| C | -0.81421700 | 1.65756600  | -5.27924600 |
| H | -1.72935800 | 2.16182800  | -5.58073000 |
| C | 2.97674600  | -3.56036200 | 4.47001600  |
| H | 3.28691700  | -4.56404900 | 4.19219500  |
| C | 2.14392000  | -3.37566200 | 5.60939200  |
| H | 1.81836700  | -4.23792300 | 6.18480500  |
| C | 1.76578700  | -2.11402700 | 5.97753900  |
| H | 1.13982400  | -1.95414900 | 6.85215900  |
| C | 3.39214700  | -2.48994900 | 3.72303200  |
| H | 4.03545500  | -2.65503500 | 2.86728400  |
| N | 0.29921000  | -1.88986100 | -0.02092200 |
| S | -0.66200400 | -2.21880700 | 1.19828000  |
| O | -2.07621800 | -2.06184200 | 0.77485900  |
| O | -0.28894900 | -1.64693700 | 2.50105800  |
| C | -0.44732600 | -4.06295400 | 1.39225900  |
| F | -0.74127100 | -4.71103000 | 0.25585800  |
| F | -1.26248500 | -4.50227500 | 2.35680200  |
| F | 0.81587700  | -4.33973400 | 1.72890100  |
| C | 0.35919000  | 4.06460400  | -0.70587000 |
| C | 0.34970000  | 3.94287800  | 0.86804200  |
| H | 0.78799600  | 4.87160400  | 1.25976100  |
| H | 1.04820600  | 3.14445300  | 1.12605300  |
| C | -0.92536800 | 3.70219100  | 1.63735900  |
| C | -0.48607400 | 2.91887900  | -1.37659900 |
| H | -1.27940300 | 3.36667600  | -1.97150800 |



|   |             |             |             |
|---|-------------|-------------|-------------|
| H | 0.12712400  | 2.34048600  | -2.06728700 |
| N | -1.12125100 | 1.94443400  | -0.47435600 |
| C | -2.44444400 | 1.73126800  | -0.37838800 |
| N | -2.88213500 | 0.53984600  | 0.06605200  |
| C | -4.22913500 | 0.21190700  | 0.41556800  |
| C | -4.90668200 | 0.89094500  | 1.43113200  |
| C | -4.83327000 | -0.86172900 | -0.23400000 |
| C | -6.20409900 | 0.51260900  | 1.76548800  |
| C | -6.13383400 | -1.23583000 | 0.11521400  |
| H | -4.28971100 | -1.40266200 | -1.00089500 |
| C | -6.82782200 | -0.55148400 | 1.10849700  |
| H | -7.83444500 | -0.84695500 | 1.37767400  |
| C | -6.76721600 | -2.39255400 | -0.61412700 |
| C | -6.96205600 | 1.28604100  | 2.81218300  |
| F | -6.08325100 | -3.54067700 | -0.41956900 |
| F | -8.04049500 | -2.60700100 | -0.22457500 |
| F | -6.78564300 | -2.17651200 | -1.95287800 |
| F | -7.71029000 | 2.26807300  | 2.25891300  |
| F | -7.80552500 | 0.49326700  | 3.50640400  |
| F | -6.13148500 | 1.87752100  | 3.69992600  |
| S | -3.56669400 | 3.02539100  | -0.71494200 |
| H | -4.42311900 | 1.70128300  | 1.96120800  |
| H | -2.25245000 | -0.27411600 | 0.12159400  |
| H | -0.45737600 | 1.23942000  | -0.10354200 |
| C | -2.06772600 | 4.48143100  | 1.50557800  |
| H | -1.98831300 | 5.47393100  | 1.06766400  |
| H | -2.73856400 | 3.88057500  | 0.44984400  |
| H | -2.83351000 | 4.38668400  | 2.27610200  |
| C | -0.26760100 | 5.42589600  | -1.17972600 |
| H | 0.28563800  | 6.25284700  | -0.71762600 |
| H | -1.28268500 | 5.47828700  | -0.78264600 |
| C | 1.87369800  | 4.00760100  | -1.04314000 |
| C | 2.68732800  | 5.11836200  | -0.75071300 |
| C | 2.51282300  | 2.85567200  | -1.52151100 |
| C | 4.06530700  | 5.09497900  | -0.95977000 |
| H | 2.24980600  | 6.02747900  | -0.34941800 |
| C | 3.89402400  | 2.82889400  | -1.73358700 |
| H | 1.96313000  | 1.94308300  | -1.70649500 |
| C | 4.67888900  | 3.94673900  | -1.46187100 |
| H | 4.65725900  | 5.97665200  | -0.72762000 |
| H | 4.35005300  | 1.91266500  | -2.09775600 |
| H | 5.75271500  | 3.92251000  | -1.62634400 |
| C | -0.37213300 | 5.67662000  | -2.67785700 |
| C | -1.57859800 | 5.77652900  | -3.25123800 |

|   |             |            |             |
|---|-------------|------------|-------------|
| H | -1.68814000 | 5.99090000 | -4.31162700 |
| H | -2.49911100 | 5.64808600 | -2.68739300 |
| C | -0.87861800 | 2.61064200 | 2.66210300  |
| H | -1.86601300 | 2.37700900 | 3.07114300  |
| H | -0.39458400 | 1.70115100 | 2.29346800  |
| H | -0.24800000 | 2.96347300 | 3.49385500  |
| C | 0.88523200  | 5.86597800 | -3.49322300 |
| H | 1.47426000  | 4.94426500 | -3.55420100 |
| H | 0.63996900  | 6.18203600 | -4.51217700 |
| H | 1.54261500  | 6.62310200 | -3.04799100 |

TS-EF-5R

l imaginary frequency

H = -5315.354609

G = -5315.555626

E(M06-2X-DCM) = -5316.242730

|   |             |             |             |
|---|-------------|-------------|-------------|
| O | -0.86571900 | -2.42447000 | -0.68797700 |
| O | -2.81411200 | -0.83165800 | -0.04573800 |
| P | -1.17826500 | -0.93567400 | -0.07486000 |
| O | -0.68757900 | 0.16938800  | -0.95606100 |
| C | -2.02884800 | -3.03874400 | -4.66132200 |
| C | -2.93481000 | -3.20748800 | -3.61921200 |
| C | -2.51635800 | -3.08212700 | -2.28703700 |
| C | -0.26025800 | -2.53459800 | -3.04147700 |
| C | -0.69960200 | -2.73985900 | -4.36154100 |
| C | -3.56825300 | -1.77351600 | 0.65503500  |
| C | -3.82317000 | -3.01976600 | 0.07967700  |
| C | -4.44805500 | -4.01258200 | 0.85228500  |
| C | -4.90986300 | -3.73508800 | 2.13386200  |
| C | -4.75663500 | -2.44609500 | 2.64199500  |
| C | -4.08190300 | -1.44397400 | 1.92595500  |
| H | 0.02414700  | -2.63931700 | -5.16499800 |
| H | -5.14995000 | -2.20059100 | 3.62413800  |
| C | -3.62758000 | -3.53227800 | -1.34685100 |
| C | -4.87947800 | -3.22697400 | -2.23775800 |
| H | -5.12810800 | -2.16365600 | -2.13979900 |
| H | -5.75896700 | -3.80496600 | -1.93704100 |
| H | -5.52601900 | -5.52974700 | -0.26038300 |
| H | -4.21110900 | -6.17624600 | 0.71537900  |
| C | -1.21221600 | -2.67828200 | -2.01361800 |
| H | -2.34323200 | -3.14640000 | -5.69651300 |
| H | -5.39551100 | -4.50400800 | 2.72934400  |
| C | -4.41424400 | -3.52125200 | -3.68161100 |
| H | -4.94172800 | -2.91514100 | -4.42727500 |

|   |             |             |             |
|---|-------------|-------------|-------------|
| H | -4.58862500 | -4.57229000 | -3.95161100 |
| C | -4.50733600 | -5.32172200 | 0.09634100  |
| C | -3.53868000 | -5.07257200 | -1.07816400 |
| H | -2.51504600 | -5.31546500 | -0.77103000 |
| H | -3.77003400 | -5.66558500 | -1.96846000 |
| C | -4.00949100 | -0.06987900 | 2.51736800  |
| C | -3.25293800 | 0.16481000  | 3.69059800  |
| C | -4.80403200 | 0.96641700  | 1.96504600  |
| C | -2.41549000 | -0.83466500 | 4.28103500  |
| C | -3.30182300 | 1.46277300  | 4.32725300  |
| C | -4.81866200 | 2.26929300  | 2.59226000  |
| C | -1.70094100 | -0.58152900 | 5.42152000  |
| H | -2.32020600 | -1.79266000 | 3.78759200  |
| C | -2.55250300 | 1.68021900  | 5.52671100  |
| C | -4.07383100 | 2.47992700  | 3.75709800  |
| C | -1.77758600 | 0.68761100  | 6.06236500  |
| H | -1.04930600 | -1.34925300 | 5.82739700  |
| H | -2.61159000 | 2.65740500  | 6.00097900  |
| H | -4.11058800 | 3.45434000  | 4.24139700  |
| H | -1.20723800 | 0.86661800  | 6.96983600  |
| C | 1.18128200  | -2.21971200 | -2.79237600 |
| C | 1.74907600  | -1.03708200 | -3.32965500 |
| C | 2.00209400  | -3.15096400 | -2.10734700 |
| C | 0.97252100  | -0.03314400 | -3.99640000 |
| C | 3.17156700  | -0.80579800 | -3.20696700 |
| C | 3.41361100  | -2.88091500 | -1.95112400 |
| C | 1.56214400  | 1.07490500  | -4.55031800 |
| H | -0.10319500 | -0.15199300 | -4.04803100 |
| C | 3.74729600  | 0.36140100  | -3.80365100 |
| C | 3.96222800  | -1.72486400 | -2.51236600 |
| C | 2.97044900  | 1.27440500  | -4.46555500 |
| H | 0.94621100  | 1.81007100  | -5.06229100 |
| H | 4.82353800  | 0.49875800  | -3.72306200 |
| H | 5.02808900  | -1.53305600 | -2.40581900 |
| H | 3.42105100  | 2.15153300  | -4.92245300 |
| C | -6.40781500 | 1.79649800  | 0.31320800  |
| H | -7.04226400 | 1.61933800  | -0.55124600 |
| C | -5.64243200 | 0.77682900  | 0.81852900  |
| H | -5.67803500 | -0.20255000 | 0.35499700  |
| C | -6.39090700 | 3.08670700  | 0.91574400  |
| H | -7.00049700 | 3.88410800  | 0.49955600  |
| C | -5.62021100 | 3.30989800  | 2.02481300  |
| H | -5.61251600 | 4.28482300  | 2.50717300  |
| C | 2.32317800  | -5.25612300 | -0.90762400 |

|   |             |             |             |
|---|-------------|-------------|-------------|
| H | 1.91406200  | -6.18035500 | -0.50846400 |
| C | 3.70649000  | -4.97020700 | -0.73264300 |
| H | 4.33882600  | -5.67283200 | -0.19683200 |
| C | 4.23295500  | -3.81694800 | -1.24653000 |
| H | 5.28987000  | -3.58887700 | -1.13146000 |
| C | 1.50457800  | -4.38238300 | -1.57352900 |
| H | 0.45675200  | -4.62561200 | -1.70326100 |
| C | -1.18273700 | 3.84405500  | -1.45837600 |
| C | -1.45536400 | 3.52019800  | 0.03938300  |
| H | -2.38201100 | 4.03463900  | 0.34199400  |
| H | -1.66144300 | 2.45177000  | 0.12700400  |
| C | -0.43711300 | 3.84571500  | 1.10119700  |
| C | 0.31263200  | 3.51253200  | -1.79734300 |
| H | 0.93695700  | 4.39581000  | -1.67164100 |
| H | 0.39646600  | 3.20402300  | -2.84254700 |
| N | 0.89449200  | 2.44498000  | -0.98107900 |
| C | 2.13526600  | 2.45897800  | -0.46762400 |
| N | 2.65119600  | 1.29602400  | -0.03715900 |
| C | 3.98002800  | 1.11826900  | 0.45738800  |
| C | 5.05292500  | 1.25298400  | -0.42083400 |
| C | 4.18913000  | 0.71685600  | 1.77829800  |
| C | 6.34837100  | 0.98847200  | 0.02281300  |
| C | 5.49256900  | 0.46790600  | 2.21201900  |
| H | 3.34429800  | 0.59084100  | 2.44754700  |
| C | 6.57635000  | 0.59971000  | 1.34129800  |
| H | 7.58267500  | 0.39583600  | 1.68587600  |
| C | 5.72613000  | -0.00938000 | 3.62335900  |
| C | 7.47617800  | 1.10878000  | -0.96548800 |
| F | 5.61292400  | -1.35176100 | 3.71918400  |
| F | 4.84005900  | 0.52880800  | 4.48526900  |
| F | 6.96647500  | 0.31392000  | 4.05754400  |
| F | 7.21508500  | 0.38870700  | -2.08958700 |
| F | 8.64684100  | 0.66500800  | -0.46772800 |
| F | 7.66155100  | 2.38549800  | -1.36545000 |
| S | 2.99712900  | 3.95589800  | -0.22761300 |
| H | 4.86662400  | 1.53424000  | -1.45105700 |
| H | 2.08447000  | 0.43656200  | -0.03702700 |
| H | 0.40148500  | 1.53354800  | -1.02714600 |
| C | 0.42158800  | 4.94774600  | 1.10716900  |
| H | 0.20352000  | 5.79620500  | 0.46388200  |
| H | 1.53607900  | 4.52253300  | 0.52065100  |
| H | 0.85389400  | 5.21844800  | 2.07153700  |
| N | -0.72962900 | -1.00509600 | 1.47777800  |
| S | 0.77625800  | -1.19003600 | 1.93151300  |

|   |              |              |              |
|---|--------------|--------------|--------------|
| O | 1. 11207200  | -0. 32028200 | 3. 07035600  |
| O | 1. 75610500  | -1. 22969000 | 0. 81249700  |
| C | 0. 82368000  | -2. 92451600 | 2. 62780100  |
| F | 0. 47381000  | -3. 81382000 | 1. 69587100  |
| F | -0. 02135300 | -3. 03261000 | 3. 66569900  |
| F | 2. 05992900  | -3. 19824700 | 3. 05448000  |
| C | -2. 12893500 | 3. 02552900  | -2. 37406100 |
| C | -3. 20774900 | 2. 26902100  | -1. 89978000 |
| C | -1. 94391800 | 3. 07984400  | -3. 76805100 |
| C | -4. 05490000 | 1. 58713400  | -2. 77743800 |
| H | -3. 41671400 | 2. 18785600  | -0. 84088900 |
| C | -2. 78459600 | 2. 39983000  | -4. 64673800 |
| H | -1. 13667200 | 3. 67318400  | -4. 18974600 |
| C | -3. 84952600 | 1. 64461900  | -4. 15323500 |
| H | -4. 87582400 | 1. 00752000  | -2. 36603200 |
| H | -2. 60810300 | 2. 46572400  | -5. 71723000 |
| H | -4. 50765300 | 1. 11096600  | -4. 83346600 |
| C | -1. 38993300 | 5. 37331500  | -1. 78850300 |
| H | -0. 61957200 | 5. 94884800  | -1. 26838900 |
| H | -1. 18602000 | 5. 50575600  | -2. 85846300 |
| C | -2. 74261800 | 5. 98654900  | -1. 46247100 |
| C | -2. 91301400 | 6. 69090900  | -0. 33584400 |
| H | -2. 10938000 | 6. 83960500  | 0. 38186500  |
| H | -3. 86470200 | 7. 15687100  | -0. 09310600 |
| C | -0. 40423700 | 2. 89932300  | 2. 25722300  |
| H | 0. 34922300  | 3. 16741800  | 3. 00122900  |
| H | -1. 39063700 | 2. 90047900  | 2. 74514500  |
| H | -0. 24508100 | 1. 86138200  | 1. 94374900  |
| C | -3. 86279200 | 5. 83964600  | -2. 46521000 |
| H | -4. 74044300 | 6. 41770700  | -2. 15954600 |
| H | -3. 54670000 | 6. 19683000  | -3. 45440700 |
| H | -4. 16577000 | 4. 79563100  | -2. 59185000 |

TS-EF-5R-1

l imaginary frequency

H = -5315. 353700

G = -5315. 554631

E(M06-2X-DCM) = -5316. 242832

|   |              |              |              |
|---|--------------|--------------|--------------|
| O | -1. 06123400 | -2. 09344200 | -1. 36154800 |
| O | -2. 83365000 | -0. 58140700 | -0. 20817200 |
| P | -1. 22147800 | -0. 84860900 | -0. 30345700 |
| O | -0. 59872000 | 0. 41208500  | -0. 81749100 |
| C | -2. 17329700 | -1. 27277900 | -5. 31398500 |
| C | -3. 12468400 | -1. 63570300 | -4. 36564300 |

|   |             |             |             |
|---|-------------|-------------|-------------|
| C | -2.73266600 | -1.99626500 | -3.06838300 |
| C | -0.40297400 | -1.53688400 | -3.63815900 |
| C | -0.82561800 | -1.26425000 | -4.95182300 |
| C | -3.70322400 | -1.60805800 | 0.16031500  |
| C | -4.09293500 | -2.55058700 | -0.79383800 |
| C | -4.85370100 | -3.65922000 | -0.38820100 |
| C | -5.30687800 | -3.77354900 | 0.92091600  |
| C | -5.00363300 | -2.76195800 | 1.82979100  |
| C | -4.19525600 | -1.66718000 | 1.48023800  |
| H | -0.07121400 | -1.01758200 | -5.69310900 |
| H | -5.38183300 | -2.81687500 | 2.84632500  |
| C | -3.92107300 | -2.57918700 | -2.31248500 |
| C | -5.09471400 | -1.83631200 | -3.03567400 |
| H | -5.20089100 | -0.83781600 | -2.59582800 |
| H | -6.05148900 | -2.35609700 | -2.92454700 |
| H | -6.08450500 | -4.56317000 | -1.92704700 |
| H | -4.89070500 | -5.66386700 | -1.24662000 |
| C | -1.39636000 | -1.87208800 | -2.69575400 |
| H | -2.46716300 | -1.01238100 | -6.32795000 |
| H | -5.89808500 | -4.63078500 | 1.23287000  |
| C | -4.63024700 | -1.71103000 | -4.50421000 |
| H | -5.05034100 | -0.83202100 | -5.00684600 |
| H | -4.93364400 | -2.58536600 | -5.09691600 |
| C | -5.05809900 | -4.62061100 | -1.53775800 |
| C | -4.03337500 | -4.11951300 | -2.57525400 |
| H | -3.05729000 | -4.57893800 | -2.38190900 |
| H | -4.31069500 | -4.34770300 | -3.60903600 |
| C | -3.96766100 | -0.60779400 | 2.51564000  |
| C | -3.22893300 | -0.90799400 | 3.68616600  |
| C | -4.61968000 | 0.64514600  | 2.38916800  |
| C | -2.52297900 | -2.14138700 | 3.85823000  |
| C | -3.16099900 | 0.05914000  | 4.75955100  |
| C | -4.52226100 | 1.61376200  | 3.45918600  |
| C | -1.82527100 | -2.40813100 | 5.00611000  |
| H | -2.51152500 | -2.85339400 | 3.04372900  |
| C | -2.43469300 | -0.26591600 | 5.94831600  |
| C | -3.80423100 | 1.29232900  | 4.61556000  |
| C | -1.78886900 | -1.46571300 | 6.07253700  |
| H | -1.27243700 | -3.33839300 | 5.09375200  |
| H | -2.40464800 | 0.46815600  | 6.75046200  |
| H | -3.75946400 | 2.01321800  | 5.43031700  |
| H | -1.23356700 | -1.69872200 | 6.97704300  |
| C | 1.05691200  | -1.48470200 | -3.31319500 |
| C | 1.77374800  | -0.27212500 | -3.47611500 |

|   |              |              |              |
|---|--------------|--------------|--------------|
| C | 1. 74354000  | -2. 66404800 | -2. 92819100 |
| C | 1. 14732100  | 0. 96267700  | -3. 84724700 |
| C | 3. 20347700  | -0. 24927500 | -3. 26167400 |
| C | 3. 16553200  | -2. 61378500 | -2. 67341600 |
| C | 1. 87406500  | 2. 11051700  | -4. 03708600 |
| H | 0. 07221000  | 0. 97767700  | -3. 97824900 |
| C | 3. 92804000  | 0. 96650200  | -3. 47956800 |
| C | 3. 85757300  | -1. 41300300 | -2. 85059000 |
| C | 3. 28801200  | 2. 11525200  | -3. 86148300 |
| H | 1. 36853700  | 3. 02669700  | -4. 33274800 |
| H | 5. 00598500  | 0. 95048600  | -3. 33655500 |
| H | 4. 92943700  | -1. 38082700 | -2. 66611200 |
| H | 3. 85076000  | 3. 02910700  | -4. 03197800 |
| C | -6. 06043300 | 2. 20364600  | 1. 17346100  |
| H | -6. 66793900 | 2. 43380500  | 0. 30273900  |
| C | -5. 42205200 | 0. 99358000  | 1. 25533000  |
| H | -5. 52959900 | 0. 27563800  | 0. 45067600  |
| C | -5. 94109500 | 3. 16258300  | 2. 21931300  |
| H | -6. 45839200 | 4. 11538900  | 2. 14022900  |
| C | -5. 19236800 | 2. 87110600  | 3. 32825400  |
| H | -5. 10837500 | 3. 58531300  | 4. 14467300  |
| C | 1. 78852700  | -5. 05490900 | -2. 42341600 |
| H | 1. 26843100  | -6. 00487600 | -2. 33426000 |
| C | 3. 18239300  | -4. 99142500 | -2. 14288300 |
| H | 3. 71198400  | -5. 88892800 | -1. 83527900 |
| C | 3. 84833900  | -3. 80327700 | -2. 27040100 |
| H | 4. 91541900  | -3. 73985800 | -2. 07149000 |
| C | 1. 09727500  | -3. 93493800 | -2. 80413400 |
| H | 0. 03822500  | -4. 00870700 | -3. 02120500 |
| C | -1. 12902000 | 4. 24075400  | -0. 15321800 |
| C | -1. 46381900 | 3. 50201700  | 1. 19805900  |
| H | -2. 30672700 | 4. 02613000  | 1. 67473100  |
| H | -1. 84513100 | 2. 50864200  | 0. 94785600  |
| C | -0. 40751800 | 3. 32955400  | 2. 26382900  |
| C | 0. 34201600  | 3. 95330400  | -0. 56679700 |
| H | 0. 99413200  | 4. 71032900  | -0. 13785700 |
| H | 0. 45164200  | 4. 04741700  | -1. 65135400 |
| N | 0. 85913200  | 2. 64583500  | -0. 15212300 |
| C | 2. 09508300  | 2. 42852400  | 0. 32838200  |
| N | 2. 55022500  | 1. 16498500  | 0. 35570000  |
| C | 3. 86431100  | 0. 77583100  | 0. 76893300  |
| C | 4. 03830500  | -0. 01642300 | 1. 90520800  |
| C | 4. 95194400  | 1. 11477700  | -0. 03241600 |
| C | 5. 32168400  | -0. 45598300 | 2. 23445800  |

|   |              |              |              |
|---|--------------|--------------|--------------|
| C | 6. 22638400  | 0. 65530900  | 0. 30046600  |
| H | 4. 79313900  | 1. 70487500  | -0. 92781400 |
| C | 6. 41929300  | -0. 12880800 | 1. 43584100  |
| H | 7. 40732700  | -0. 49354800 | 1. 68826000  |
| C | 7. 35945300  | 0. 95858500  | -0. 64078800 |
| C | 5. 52914800  | -1. 25777000 | 3. 49467600  |
| F | 7. 19482900  | 0. 31095900  | -1. 82727800 |
| F | 8. 55566100  | 0. 58404800  | -0. 14793000 |
| F | 7. 42826300  | 2. 27507300  | -0. 93409800 |
| F | 5. 70222400  | -0. 44905400 | 4. 56722000  |
| F | 6. 62975700  | -2. 03989200 | 3. 41245400  |
| F | 4. 47845000  | -2. 05346500 | 3. 76297000  |
| S | 3. 02757700  | 3. 72059200  | 1. 03775300  |
| H | 3. 18066100  | -0. 30619600 | 2. 50310200  |
| H | 1. 94751600  | 0. 38514200  | 0. 06401600  |
| H | 0. 32814500  | 1. 81118600  | -0. 46444600 |
| C | 0. 50202000  | 4. 30891600  | 2. 66328300  |
| H | 0. 32229800  | 5. 34769900  | 2. 39628000  |
| H | 1. 60673700  | 4. 07776600  | 1. 93282800  |
| H | 0. 96436000  | 4. 17143200  | 3. 64191500  |
| N | -0. 80563300 | -1. 44120000 | 1. 14004400  |
| S | 0. 68688300  | -1. 82779800 | 1. 51445800  |
| O | 1. 03464600  | -1. 38724900 | 2. 87423600  |
| O | 1. 67848900  | -1. 54636600 | 0. 44378100  |
| C | 0. 64431400  | -3. 69418800 | 1. 61468000  |
| F | -0. 20885700 | -4. 09216800 | 2. 57175800  |
| F | 1. 86406000  | -4. 15089800 | 1. 91392400  |
| F | 0. 25367200  | -4. 21657200 | 0. 44983200  |
| C | -2. 16987800 | 3. 74494600  | -1. 18337900 |
| C | -1. 83300100 | 2. 96083800  | -2. 29461000 |
| C | -3. 52744000 | 4. 06153700  | -1. 00280600 |
| C | -2. 80356000 | 2. 54020700  | -3. 20716600 |
| H | -0. 81176800 | 2. 64128300  | -2. 45953400 |
| C | -4. 49830300 | 3. 64945200  | -1. 91356900 |
| H | -3. 84578200 | 4. 63302500  | -0. 13569200 |
| C | -4. 13959900 | 2. 89174400  | -3. 02883200 |
| H | -2. 50856700 | 1. 92411200  | -4. 05231200 |
| H | -5. 53713100 | 3. 92202500  | -1. 74788900 |
| H | -4. 89395200 | 2. 57176600  | -3. 74263600 |
| C | -1. 26143200 | 5. 79842400  | 0. 02346800  |
| H | -2. 31294000 | 6. 02781700  | 0. 23274200  |
| H | -0. 70412200 | 6. 08915000  | 0. 91801400  |
| C | -0. 40379400 | 2. 00847700  | 2. 96100900  |
| H | -0. 41349700 | 1. 16474200  | 2. 26368700  |



|   |             |            |             |
|---|-------------|------------|-------------|
| H | 0.43425800  | 1.89681800 | 3.65321500  |
| H | -1.33733500 | 1.91522500 | 3.53779500  |
| C | -0.78217600 | 6.67408700 | -1.12328000 |
| C | 0.33050200  | 7.40716000 | -0.99105700 |
| H | 0.93123300  | 7.38876500 | -0.08460400 |
| H | 0.68137200  | 8.06030800 | -1.78617800 |
| C | -1.61686700 | 6.74393300 | -2.38057000 |
| H | -1.65574800 | 5.78191000 | -2.90289400 |
| H | -2.65669500 | 7.00779800 | -2.14760300 |
| H | -1.21993300 | 7.49394900 | -3.07166100 |

TS-EF-5R-10

l imaginary frequency

H = -5315.360379

G = -5315.559737

E(M06-2X-DCM) = -5316.242879

|   |            |             |             |
|---|------------|-------------|-------------|
| O | 1.62838700 | -2.66539500 | -0.30217500 |
| O | 2.77870600 | -0.36819300 | -0.59393600 |
| P | 1.31407100 | -1.05666900 | -0.37036600 |
| O | 0.74063200 | -0.51678600 | 0.89911200  |
| C | 4.30642500 | -4.01476600 | 2.62713600  |
| C | 4.76710400 | -3.55999300 | 1.39644700  |
| C | 3.86751400 | -3.16223900 | 0.39560700  |
| C | 2.00275500 | -3.62110800 | 1.90194800  |
| C | 2.93262000 | -4.06299900 | 2.85835400  |
| C | 3.48866900 | -0.61320700 | -1.77025400 |
| C | 4.18682000 | -1.80989600 | -1.91819700 |
| C | 4.71816500 | -2.13949300 | -3.17477500 |
| C | 4.67607800 | -1.22610300 | -4.22283800 |
| C | 4.10972000 | 0.03036600  | -4.00369500 |
| C | 3.49356200 | 0.36312500  | -2.78578400 |
| H | 2.55636300 | -4.43197000 | 3.80806300  |
| H | 4.12027900 | 0.77337800  | -4.79569800 |
| C | 4.62053900 | -2.85492100 | -0.89409600 |
| C | 6.02699300 | -2.48087500 | -0.30757700 |
| H | 6.00676700 | -1.43151100 | 0.00855600  |
| H | 6.82907600 | -2.59138800 | -1.04368900 |
| H | 6.38405800 | -3.53251100 | -3.18359800 |
| H | 4.95891100 | -4.13471600 | -4.02202800 |
| C | 2.50147500 | -3.14696100 | 0.67358500  |
| H | 5.00257400 | -4.32740800 | 3.40135300  |
| H | 5.09490700 | -1.47383900 | -5.19504300 |
| C | 6.19459200 | -3.38855100 | 0.92794500  |
| H | 6.84007000 | -2.94590400 | 1.69508300  |

|   |              |              |              |
|---|--------------|--------------|--------------|
| H | 6. 64295200  | -4. 35506600 | 0. 65707800  |
| C | 5. 28540600  | -3. 54379100 | -3. 15846700 |
| C | 4. 75724700  | -4. 10821400 | -1. 81927500 |
| H | 3. 76408900  | -4. 54770800 | -1. 96633300 |
| H | 5. 40435500  | -4. 87846200 | -1. 38751800 |
| C | 2. 93977300  | 1. 73906500  | -2. 58805700 |
| C | 1. 87611500  | 2. 20777300  | -3. 39834400 |
| C | 3. 55539900  | 2. 61014400  | -1. 65175900 |
| C | 1. 19602800  | 1. 37472100  | -4. 34459600 |
| C | 1. 43299900  | 3. 57918800  | -3. 27474500 |
| C | 3. 07920900  | 3. 96847200  | -1. 51840500 |
| C | 0. 19781700  | 1. 86836200  | -5. 14287000 |
| H | 1. 46334100  | 0. 32705700  | -4. 40356600 |
| C | 0. 38905200  | 4. 05599900  | -4. 12915100 |
| C | 2. 03381800  | 4. 41569400  | -2. 33094800 |
| C | -0. 20383500 | 3. 23133700  | -5. 04791700 |
| H | -0. 30713200 | 1. 20781400  | -5. 84171500 |
| H | 0. 08745800  | 5. 09745600  | -4. 03838900 |
| H | 1. 68398100  | 5. 44046800  | -2. 22653600 |
| H | -0. 98479300 | 3. 61023500  | -5. 70298200 |
| C | 0. 54454900  | -3. 70669100 | 2. 22641700  |
| C | 0. 00133100  | -2. 88792500 | 3. 24568100  |
| C | -0. 26183600 | -4. 68027400 | 1. 58821900  |
| C | 0. 75821400  | -1. 86799000 | 3. 90952300  |
| C | -1. 37616600 | -3. 06508100 | 3. 64534500  |
| C | -1. 64188700 | -4. 83688800 | 1. 98748000  |
| C | 0. 20825600  | -1. 10423800 | 4. 90659200  |
| H | 1. 78162800  | -1. 69097000 | 3. 60089900  |
| C | -1. 91089300 | -2. 24889700 | 4. 69184900  |
| C | -2. 15767600 | -4. 03229400 | 3. 00780800  |
| C | -1. 14402700 | -1. 29928900 | 5. 31046800  |
| H | 0. 80663200  | -0. 33360500 | 5. 38403400  |
| H | -2. 94707500 | -2. 40319100 | 4. 98482600  |
| H | -3. 19171100 | -4. 16808000 | 3. 31906300  |
| H | -1. 56228800 | -0. 68664000 | 6. 10472100  |
| C | 5. 23117400  | 3. 08408300  | 0. 06703500  |
| H | 6. 06495400  | 2. 75371100  | 0. 68032500  |
| C | 4. 66295800  | 2. 21964100  | -0. 83158100 |
| H | 5. 06090200  | 1. 21680500  | -0. 93038300 |
| C | 4. 74309900  | 4. 41372200  | 0. 20590400  |
| H | 5. 20628500  | 5. 08630800  | 0. 92296400  |
| C | 3. 69950000  | 4. 84076900  | -0. 56951700 |
| H | 3. 31744500  | 5. 85337300  | -0. 47526700 |
| C | -0. 56682400 | -6. 49421200 | -0. 02132300 |

|   |             |             |             |
|---|-------------|-------------|-------------|
| H | -0.16146400 | -7.14225200 | -0.79380400 |
| C | -1.92972200 | -6.63376700 | 0.36574500  |
| H | -2.55260400 | -7.38287500 | -0.11568900 |
| C | -2.44654200 | -5.82917800 | 1.34457700  |
| H | -3.48374300 | -5.93051800 | 1.65532400  |
| C | 0.23680600  | -5.55556100 | 0.57070200  |
| H | 1.27415300  | -5.46928500 | 0.26846700  |
| N | 0.52972000  | -0.86357800 | -1.77876900 |
| S | -0.98602100 | -1.17471400 | -2.03008400 |
| O | -1.58489900 | -0.24520600 | -3.00711300 |
| O | -1.79868100 | -1.42335700 | -0.80108400 |
| C | -1.01708300 | -2.82506300 | -2.90593500 |
| F | -0.33296300 | -2.74635200 | -4.05235000 |
| F | -2.28772500 | -3.15123200 | -3.18281700 |
| F | -0.48051900 | -3.77506400 | -2.14002500 |
| C | -5.23705200 | 0.23712400  | -0.60709700 |
| C | -4.51968000 | 0.97140300  | -1.78283000 |
| H | -5.19040400 | 0.98609000  | -2.65613800 |
| H | -3.66087200 | 0.37944100  | -2.11239500 |
| C | -4.06918500 | 2.38729800  | -1.61824400 |
| C | -4.44127800 | 0.46258400  | 0.72190000  |
| H | -4.85373900 | 1.29787400  | 1.28124600  |
| H | -4.54178900 | -0.43205300 | 1.34617200  |
| N | -3.01414000 | 0.75613900  | 0.55595200  |
| C | -2.34472700 | 1.71772600  | 1.23548700  |
| N | -1.00560700 | 1.58032500  | 1.30407400  |
| C | -0.06326000 | 2.52165700  | 1.80431900  |
| C | -0.06308300 | 3.86206800  | 1.41602100  |
| C | 0.94534300  | 2.03835700  | 2.64580800  |
| C | 0.91644100  | 4.72419600  | 1.91095700  |
| C | 1.92534600  | 2.90794200  | 3.11778800  |
| H | 0.96076400  | 0.98813700  | 2.90831300  |
| C | 1.91112400  | 4.25883200  | 2.76753500  |
| H | 2.67307900  | 4.93184500  | 3.14114400  |
| C | 3.05503800  | 2.38856200  | 3.96723500  |
| C | 0.86907100  | 6.17554400  | 1.51637600  |
| F | 2.75735000  | 1.20374700  | 4.54846900  |
| F | 4.18011900  | 2.20228300  | 3.24246300  |
| F | 3.36877400  | 3.25643500  | 4.95699600  |
| F | 2.05520200  | 6.79574100  | 1.70642800  |
| F | 0.54323700  | 6.32628600  | 0.20812200  |
| F | -0.05480100 | 6.86243700  | 2.22467700  |
| S | -3.17316600 | 3.07168300  | 1.93136200  |
| H | -0.81091200 | 4.23186500  | 0.72775000  |

|   |              |             |             |
|---|--------------|-------------|-------------|
| H | -0.56753600  | 0.66828500  | 1.06870700  |
| H | -2.45280000  | 0.00119100  | 0.13251300  |
| C | -4.70062800  | 3.31458800  | -0.76623700 |
| H | -5.72103400  | 3.09094600  | -0.45557500 |
| H | -4.08689100  | 3.21390700  | 0.31211000  |
| H | -4.51953300  | 4.36721100  | -0.99468500 |
| C | -5.20388400  | -1.29074200 | -1.01954700 |
| H | -4.15410800  | -1.56474300 | -1.15936500 |
| H | -5.68601400  | -1.36656900 | -2.00354500 |
| C | -6.70741400  | 0.68162700  | -0.44024000 |
| C | -7.30281200  | 0.86297400  | 0.81954700  |
| C | -7.53600500  | 0.83925400  | -1.56581000 |
| C | -8.65074500  | 1.20829000  | 0.94695000  |
| H | -6.72964500  | 0.71725200  | 1.72806500  |
| C | -8.88091700  | 1.18559500  | -1.44409000 |
| H | -7.14097300  | 0.67546700  | -2.56447100 |
| C | -9.44751300  | 1.37754500  | -0.18341700 |
| H | -9.07395200  | 1.34017200  | 1.93908900  |
| H | -9.48629800  | 1.30148100  | -2.33917000 |
| H | -10.49481900 | 1.64874500  | -0.08516400 |
| C | -5.84209100  | -2.29448800 | -0.07530700 |
| C | -5.08550600  | -2.96265500 | 0.80556900  |
| H | -4.01015000  | -2.81940800 | 0.87165600  |
| H | -5.51814800  | -3.70481800 | 1.47310600  |
| C | -2.89683000  | 2.80935200  | -2.43545500 |
| H | -2.51017400  | 3.78847200  | -2.14191300 |
| H | -2.10178300  | 2.05618200  | -2.43605200 |
| H | -3.21938300  | 2.88144900  | -3.48667400 |
| C | -7.31745900  | -2.58768000 | -0.22235600 |
| H | -7.94151300  | -1.70610200 | -0.04457700 |
| H | -7.53903700  | -2.92881600 | -1.24324300 |
| H | -7.63332600  | -3.37457700 | 0.46995600  |

TS-EF-5R-11

l imaginary frequency

H = -5315.351510

G = -5315.552329

E(M06-2X-DCM) = -5316.236460

|   |             |             |             |
|---|-------------|-------------|-------------|
| O | -2.30422400 | -1.52133800 | -0.95211100 |
| O | -1.67414000 | -1.64951300 | 1.56908500  |
| P | -1.24226900 | -0.95112700 | 0.15197400  |
| O | -1.32677200 | 0.53162700  | 0.36533900  |
| C | -6.46187700 | -1.41020400 | -0.43356500 |
| C | -5.69302000 | -2.38058200 | 0.19833100  |

|   |             |             |             |
|---|-------------|-------------|-------------|
| C | -4.30838300 | -2.45804900 | -0.02105200 |
| C | -4.44217500 | -0.50222700 | -1.48032300 |
| C | -5.83592800 | -0.50615800 | -1.28740300 |
| C | -1.46698100 | -3.02135000 | 1.73701500  |
| C | -2.35467400 | -3.92531700 | 1.15895300  |
| C | -2.02351000 | -5.28964600 | 1.13542900  |
| C | -0.89948900 | -5.75693700 | 1.80653200  |
| C | -0.10663400 | -4.84981200 | 2.50925700  |
| C | -0.35556400 | -3.46750300 | 2.47776400  |
| H | -6.42929600 | 0.23221700  | -1.81794400 |
| H | 0.74863300  | -5.20547900 | 3.07595300  |
| C | -3.76332700 | -3.74048100 | 0.60406700  |
| C | -4.81557400 | -3.95780500 | 1.74631800  |
| H | -4.53546900 | -3.33366800 | 2.60288700  |
| H | -4.85079000 | -4.99598100 | 2.08916000  |
| H | -3.67802200 | -6.68468100 | 0.94047700  |
| H | -2.54022900 | -6.74477100 | -0.40131500 |
| C | -3.68631800 | -1.47880800 | -0.79796700 |
| H | -7.53666600 | -1.36215700 | -0.27790300 |
| H | -0.64412800 | -6.81352700 | 1.79815900  |
| C | -6.14809500 | -3.45931600 | 1.15447600  |
| H | -6.83769400 | -3.08066200 | 1.91767600  |
| H | -6.67703200 | -4.26275400 | 0.62271200  |
| C | -3.02638700 | -6.06557400 | 0.30826700  |
| C | -3.82008500 | -4.94238200 | -0.39648000 |
| H | -3.30432400 | -4.65283900 | -1.31837300 |
| H | -4.84486100 | -5.22740600 | -0.65462000 |
| C | 0.52795900  | -2.55415100 | 3.26721000  |
| C | 1.90692400  | -2.45934300 | 2.95584700  |
| C | 0.00824000  | -1.88328700 | 4.40427500  |
| C | 2.48408500  | -3.07759100 | 1.79889600  |
| C | 2.78564100  | -1.70369500 | 3.82147400  |
| C | 0.89284000  | -1.09964300 | 5.23745700  |
| C | 3.82861500  | -2.99833700 | 1.54679200  |
| H | 1.83647000  | -3.58875200 | 1.09832000  |
| C | 4.18535600  | -1.65827100 | 3.52837300  |
| C | 2.25468200  | -1.03857500 | 4.92910000  |
| C | 4.69835500  | -2.29753500 | 2.43131500  |
| H | 4.23219700  | -3.45791600 | 0.64964700  |
| H | 4.83453200  | -1.10460500 | 4.20325300  |
| H | 2.91971000  | -0.46828000 | 5.57497300  |
| H | 5.76114500  | -2.25214800 | 2.21399400  |
| C | -3.87341700 | 0.50137300  | -2.43425200 |
| C | -4.08423600 | 1.88523700  | -2.19622000 |

|   |             |             |             |
|---|-------------|-------------|-------------|
| C | -3.25930500 | 0.07638600  | -3.64046500 |
| C | -4.67571200 | 2.38894200  | -0.99128500 |
| C | -3.70405600 | 2.85258800  | -3.20238800 |
| C | -2.84381500 | 1.05911400  | -4.61695900 |
| C | -4.92796900 | 3.72633400  | -0.81826000 |
| H | -4.92465800 | 1.69106800  | -0.20080800 |
| C | -3.97955700 | 4.23974500  | -2.98167700 |
| C | -3.08814300 | 2.41465300  | -4.37873000 |
| C | -4.58758400 | 4.66854900  | -1.83129400 |
| H | -5.39130900 | 4.07258200  | 0.10183800  |
| H | -3.70691300 | 4.94746900  | -3.76163600 |
| H | -2.81078200 | 3.14464000  | -5.13734800 |
| H | -4.81242700 | 5.72235900  | -1.68757300 |
| C | -1.83318300 | -1.31476000 | 5.91182600  |
| H | -2.88086700 | -1.40147400 | 6.18724100  |
| C | -1.36516800 | -1.96925700 | 4.80216200  |
| H | -2.04411700 | -2.57466300 | 4.21321800  |
| C | -0.96088900 | -0.52564400 | 6.71418000  |
| H | -1.34874400 | -0.01544400 | 7.59190900  |
| C | 0.36352500  | -0.42633800 | 6.38304100  |
| H | 1.04579400  | 0.16109600  | 6.99328700  |
| C | -2.45818200 | -1.67770600 | -5.14048200 |
| H | -2.30416700 | -2.73212600 | -5.35087800 |
| C | -2.02449200 | -0.70417800 | -6.08305600 |
| H | -1.54404000 | -1.02254700 | -7.00398800 |
| C | -2.22026000 | 0.62526600  | -5.82823300 |
| H | -1.90763800 | 1.38091900  | -6.54511500 |
| C | -3.05952600 | -1.30180300 | -3.96910300 |
| H | -3.38586200 | -2.06199700 | -3.27170200 |
| N | 0.19450300  | -1.56749900 | -0.25644000 |
| S | 0.77839400  | -1.87293500 | -1.70801100 |
| O | 2.22643000  | -2.09299700 | -1.57495500 |
| O | 0.30690700  | -0.96793400 | -2.77127400 |
| C | 0.14587300  | -3.57903100 | -2.17651500 |
| F | 0.32342000  | -4.43198000 | -1.15805400 |
| F | 0.83452400  | -4.01973100 | -3.23388600 |
| F | -1.15724500 | -3.56730200 | -2.49631600 |
| C | -0.80735800 | 3.97863300  | 1.18176100  |
| C | -1.00808200 | 3.70137700  | -0.34213700 |
| H | -1.82659900 | 4.32831800  | -0.72480000 |
| H | -1.36993100 | 2.67655400  | -0.46006200 |
| C | 0.13366100  | 3.90744200  | -1.29015000 |
| C | 0.49447500  | 3.26250500  | 1.67329700  |
| H | 1.32906200  | 3.95642500  | 1.71347100  |

|   |             |             |             |
|---|-------------|-------------|-------------|
| H | 0.32938400  | 2.88600700  | 2.68837600  |
| N | 0.94682900  | 2.14265800  | 0.83785700  |
| C | 2.21364500  | 1.96514600  | 0.42223900  |
| N | 2.58141200  | 0.74164700  | -0.01028000 |
| C | 3.84364900  | 0.47212900  | -0.64253700 |
| C | 3.90450300  | 0.32993400  | -2.02809900 |
| C | 4.99092400  | 0.33549800  | 0.13565900  |
| C | 5.13271000  | 0.06912000  | -2.63584300 |
| C | 6.21415100  | 0.07271000  | -0.48313200 |
| H | 4.92519600  | 0.42784000  | 1.21274700  |
| C | 6.29098200  | -0.05766600 | -1.86929900 |
| H | 7.24220600  | -0.26069300 | -2.34744000 |
| C | 7.44704600  | -0.13327800 | 0.35529800  |
| C | 5.22320000  | -0.01021300 | -4.13776500 |
| F | 7.60948700  | -1.43869000 | 0.69386700  |
| F | 8.56804300  | 0.23812300  | -0.29853700 |
| F | 7.39431600  | 0.56368500  | 1.50997800  |
| F | 5.49867300  | 1.20330700  | -4.67667900 |
| F | 6.20869200  | -0.84512600 | -4.53487600 |
| F | 4.07279300  | -0.43528300 | -4.69231800 |
| S | 3.34115700  | 3.28756000  | 0.34760700  |
| H | 3.00038100  | 0.39964200  | -2.62063900 |
| H | 1.92745000  | -0.04435100 | 0.07323000  |
| H | 0.26408400  | 1.37490900  | 0.71540300  |
| C | 1.13921100  | 4.86105900  | -1.10395400 |
| H | 0.95496900  | 5.67131100  | -0.40026800 |
| H | 2.06029300  | 4.20456800  | -0.46692600 |
| H | 1.71825200  | 5.14015900  | -1.98596200 |
| C | -2.07674600 | 3.33702800  | 1.87715100  |
| H | -2.11626500 | 2.29268700  | 1.55644500  |
| H | -2.95730900 | 3.83281600  | 1.44963600  |
| C | -0.76451800 | 5.48742400  | 1.51049200  |
| C | 0.12218500  | 6.03573600  | 2.45249700  |
| C | -1.69224000 | 6.36528600  | 0.92083900  |
| C | 0.09995600  | 7.39616300  | 2.77128600  |
| H | 0.83518400  | 5.40632400  | 2.97322500  |
| C | -1.71671000 | 7.72344100  | 1.23449000  |
| H | -2.42220000 | 5.99058600  | 0.20920900  |
| C | -0.81568600 | 8.25044100  | 2.16071200  |
| H | 0.80311500  | 7.78183000  | 3.50466700  |
| H | -2.44564400 | 8.37021200  | 0.75304800  |
| H | -0.83166400 | 9.30878000  | 2.40540300  |
| C | -2.16131800 | 3.38108200  | 3.39257200  |
| C | -1.79823300 | 2.31348200  | 4.11685500  |

|   |             |            |             |
|---|-------------|------------|-------------|
| H | -1.87333100 | 2.30502900 | 5.20146000  |
| H | -1.43817600 | 1.39771900 | 3.65460700  |
| C | -2.75341300 | 4.60665900 | 4.05045500  |
| H | -2.17130700 | 5.51253000 | 3.85301700  |
| H | -3.76573900 | 4.79605800 | 3.66663300  |
| H | -2.82458900 | 4.47620700 | 5.13509100  |
| C | 0.16112900  | 3.01595800 | -2.48797600 |
| H | 1.01765800  | 3.21146200 | -3.13798800 |
| H | 0.14766500  | 1.95608300 | -2.20302700 |
| H | -0.76274300 | 3.16211000 | -3.06661900 |

TS-EF-5R-12

l imaginary frequency

H = -5315.351856

G = -5315.552273

E(M06-2X-DCM) = -5316.240907

|   |            |             |             |
|---|------------|-------------|-------------|
| O | 2.18070900 | -1.90018800 | -0.24966900 |
| O | 1.82348400 | 0.27892600  | -1.62973000 |
| P | 1.17680700 | -0.63103500 | -0.42180000 |
| O | 1.11535100 | 0.29555100  | 0.75886600  |
| C | 6.26818000 | -1.39575100 | 0.48417200  |
| C | 5.75939400 | -1.26884400 | -0.80420900 |
| C | 4.40046600 | -1.50517900 | -1.06563300 |
| C | 4.02897400 | -1.93468400 | 1.31350600  |
| C | 5.40851600 | -1.76016700 | 1.51976300  |
| C | 1.86750300 | -0.22959200 | -2.92808700 |
| C | 2.85925800 | -1.14634800 | -3.27118800 |
| C | 2.77884400 | -1.80728200 | -4.50768700 |
| C | 1.80533600 | -1.45858700 | -5.43682500 |
| C | 0.91046900 | -0.43405900 | -5.12767900 |
| C | 0.90813500 | 0.19183100  | -3.87066700 |
| H | 5.80129200 | -1.90330000 | 2.52204100  |
| H | 0.17355000 | -0.11990800 | -5.86098400 |
| C | 4.16176900 | -1.53375600 | -2.57365100 |
| C | 5.33181000 | -0.60603100 | -3.05149500 |
| H | 5.01512800 | 0.43845600  | -2.94767600 |
| H | 5.59396700 | -0.77104400 | -4.10077600 |
| H | 4.64623900 | -2.58031200 | -5.30224700 |
| H | 3.44677100 | -3.82751100 | -4.97840100 |
| C | 3.54178100 | -1.75931800 | 0.00264600  |
| H | 7.32387100 | -1.22973300 | 0.68380200  |
| H | 1.74489600 | -1.96502500 | -6.39675400 |
| C | 6.49035300 | -0.89742900 | -2.07533700 |
| H | 7.15840100 | -0.03880600 | -1.94141000 |



|   |             |             |             |
|---|-------------|-------------|-------------|
| H | 7.11458400  | -1.72899300 | -2.43139000 |
| C | 3.84598300  | -2.87591600 | -4.60943300 |
| C | 4.36110000  | -2.97301300 | -3.15634200 |
| H | 3.73036500  | -3.66731700 | -2.59073000 |
| H | 5.39748500  | -3.31689200 | -3.08194400 |
| C | -0.05553600 | 1.31085100  | -3.61870200 |
| C | -1.45055800 | 1.06324400  | -3.58956400 |
| C | 0.43094600  | 2.64034900  | -3.52566600 |
| C | -2.00329400 | -0.25648600 | -3.64874200 |
| C | -2.37362300 | 2.17209300  | -3.47787000 |
| C | -0.50349900 | 3.73693800  | -3.39521300 |
| C | -3.35739000 | -0.46346300 | -3.62101000 |
| H | -1.33276300 | -1.10460700 | -3.67819200 |
| C | -3.78084400 | 1.91298500  | -3.46787900 |
| C | -1.87659100 | 3.47402200  | -3.37946000 |
| C | -4.26293900 | 0.63312700  | -3.54248600 |
| H | -3.74232100 | -1.47823900 | -3.63112800 |
| H | -4.45937300 | 2.76026600  | -3.39745700 |
| H | -2.57557800 | 4.30432200  | -3.29762700 |
| H | -5.33223500 | 0.44417200  | -3.51356400 |
| C | 3.15616500  | -2.33623600 | 2.46043500  |
| C | 3.03497300  | -1.48684000 | 3.58912900  |
| C | 2.52076800  | -3.60395700 | 2.45588800  |
| C | 3.65630000  | -0.19798700 | 3.66713200  |
| C | 2.25920000  | -1.91870800 | 4.73052300  |
| C | 1.71800600  | -4.00491000 | 3.58906400  |
| C | 3.56392100  | 0.57944800  | 4.79375000  |
| H | 4.21748400  | 0.16097600  | 2.81310000  |
| C | 2.18184300  | -1.07641400 | 5.88450600  |
| C | 1.61061800  | -3.15539100 | 4.69268900  |
| C | 2.82344200  | 0.13360500  | 5.92668500  |
| H | 4.06467600  | 1.54393400  | 4.82571400  |
| H | 1.60754400  | -1.42904700 | 6.73835900  |
| H | 1.01913100  | -3.47173700 | 5.54962200  |
| H | 2.77269000  | 0.75319300  | 6.81845700  |
| C | 2.26345900  | 4.26345000  | -3.50618400 |
| H | 3.32732000  | 4.47794000  | -3.55974900 |
| C | 1.82439500  | 2.96737200  | -3.58941500 |
| H | 2.54327000  | 2.16623000  | -3.71640200 |
| C | 1.33930500  | 5.33688100  | -3.35767100 |
| H | 1.70427500  | 6.35886800  | -3.30021800 |
| C | -0.00449700 | 5.07585900  | -3.30786500 |
| H | -0.72457000 | 5.88669200  | -3.21930600 |
| C | 2.02971100  | -5.75639200 | 1.41054500  |

|   |              |              |              |
|---|--------------|--------------|--------------|
| H | 2. 14797000  | -6. 44256700 | 0. 57651800  |
| C | 1. 21373800  | -6. 13092700 | 2. 51446000  |
| H | 0. 71235900  | -7. 09470800 | 2. 51140500  |
| C | 1. 06880800  | -5. 27854300 | 3. 57389000  |
| H | 0. 45732500  | -5. 55392100 | 4. 42975700  |
| C | 2. 66081400  | -4. 54149300 | 1. 38393100  |
| H | 3. 28147300  | -4. 28157400 | 0. 53515900  |
| N | -0. 21878800 | -1. 23641300 | -0. 96600400 |
| S | -0. 84836700 | -2. 69501400 | -0. 73119300 |
| O | -2. 24763700 | -2. 65345700 | -1. 17567000 |
| O | -0. 53724500 | -3. 29532100 | 0. 57273000  |
| C | -0. 03398900 | -3. 82054300 | -1. 99832900 |
| F | -0. 02783800 | -3. 24319200 | -3. 21015400 |
| F | -0. 73183200 | -4. 95811100 | -2. 07052400 |
| F | 1. 23048200  | -4. 11908400 | -1. 66833800 |
| C | 0. 62554800  | 3. 98735500  | 1. 43391200  |
| C | 0. 83464400  | 2. 98385800  | 2. 60223900  |
| H | 1. 57792100  | 3. 39233700  | 3. 30284600  |
| H | 1. 29754800  | 2. 08257000  | 2. 19335200  |
| C | -0. 34423200 | 2. 54444700  | 3. 42388200  |
| C | -0. 63900800 | 3. 56468400  | 0. 59919000  |
| H | -1. 50821400 | 4. 14865600  | 0. 89541600  |
| H | -0. 45329700 | 3. 77086500  | -0. 46104200 |
| N | -1. 00417000 | 2. 15132500  | 0. 72004200  |
| C | -2. 26454000 | 1. 68322400  | 0. 82863100  |
| N | -2. 48635300 | 0. 41763900  | 0. 42698400  |
| C | -3. 71065000 | -0. 30452900 | 0. 60042000  |
| C | -3. 71057000 | -1. 47098200 | 1. 36575500  |
| C | -4. 87282400 | 0. 11945200  | -0. 04090400 |
| C | -4. 89135000 | -2. 20098100 | 1. 50192100  |
| C | -6. 04735900 | -0. 61989200 | 0. 10205800  |
| H | -4. 85320200 | 1. 00564800  | -0. 66308600 |
| C | -6. 06420000 | -1. 77968300 | 0. 87499100  |
| H | -6. 97662100 | -2. 35432800 | 0. 97996000  |
| C | -7. 27617000 | -0. 18618100 | -0. 65145000 |
| C | -4. 91936600 | -3. 42096000 | 2. 38613500  |
| F | -7. 22164100 | -0. 56379600 | -1. 95432800 |
| F | -8. 40338000 | -0. 71848900 | -0. 13574300 |
| F | -7. 41666600 | 1. 15742900  | -0. 64585300 |
| F | -5. 27307700 | -3. 09564600 | 3. 65502300  |
| F | -5. 82014900 | -4. 33017400 | 1. 95295200  |
| F | -3. 71997100 | -4. 02535000 | 2. 45379300  |
| S | -3. 50891100 | 2. 63928600  | 1. 56734300  |
| H | -2. 79358300 | -1. 82073800 | 1. 82689000  |

|   |             |             |             |
|---|-------------|-------------|-------------|
| H | -1.74040900 | -0.07570100 | -0.08735400 |
| H | -0.25842300 | 1.46200500  | 0.52708200  |
| C | -1.44477500 | 3.35442100  | 3.72643800  |
| H | -1.34597400 | 4.43064500  | 3.59421500  |
| H | -2.30845000 | 3.07419900  | 2.79864200  |
| H | -2.04582800 | 3.05189400  | 4.58619100  |
| C | 1.87301300  | 3.88017500  | 0.47329500  |
| H | 1.69139700  | 4.57109200  | -0.35610100 |
| H | 1.87236600  | 2.87080500  | 0.04475600  |
| C | 0.45743800  | 5.45720300  | 1.86180900  |
| C | 0.00556800  | 6.39751100  | 0.91738100  |
| C | 0.78354700  | 5.93619800  | 3.13825100  |
| C | -0.12878500 | 7.74725100  | 1.23881000  |
| H | -0.23362900 | 6.07870800  | -0.09338900 |
| C | 0.64871500  | 7.28799400  | 3.46626300  |
| H | 1.14902100  | 5.25930200  | 3.90315300  |
| C | 0.19032800  | 8.20134700  | 2.51961100  |
| H | -0.48301100 | 8.44480500  | 0.48442600  |
| H | 0.90842700  | 7.62211100  | 4.46730500  |
| H | 0.08535300  | 9.25242200  | 2.77353000  |
| C | 3.24248100  | 4.17057700  | 1.06959300  |
| C | 3.70055300  | 5.42128000  | 1.20113500  |
| H | 4.68704800  | 5.62340400  | 1.61221500  |
| H | 3.11439500  | 6.28571300  | 0.90282500  |
| C | 4.09560700  | 2.98114000  | 1.44266400  |
| H | 3.61302000  | 2.34773700  | 2.19586700  |
| H | 4.26398300  | 2.33571200  | 0.57016400  |
| H | 5.07044600  | 3.29355200  | 1.83123400  |
| C | -0.29427100 | 1.14067900  | 3.92873500  |
| H | -1.22275000 | 0.84073100  | 4.42179900  |
| H | -0.04736600 | 0.44335000  | 3.11957100  |
| H | 0.52830500  | 1.04524700  | 4.65419100  |

TS-EF-5R-2

l imaginary frequency

H = -5315.353700

G = -5315.554632

E(M06-2X-DCM) = -5316.242840

|   |             |             |             |
|---|-------------|-------------|-------------|
| O | -1.06136600 | -2.09284200 | -1.36216300 |
| O | -2.83356700 | -0.58116000 | -0.20799000 |
| P | -1.22141600 | -0.84840400 | -0.30357700 |
| O | -0.59867900 | 0.41247100  | -0.81718700 |
| C | -2.17391800 | -1.27061300 | -5.31413300 |
| C | -3.12520800 | -1.63380100 | -4.36579500 |

|   |             |             |             |
|---|-------------|-------------|-------------|
| C | -2.73305000 | -1.99489900 | -3.06872700 |
| C | -0.40338600 | -1.53557200 | -3.63866700 |
| C | -0.82618400 | -1.26238300 | -4.95216600 |
| C | -3.70314400 | -1.60789400 | 0.16025000  |
| C | -4.09307200 | -2.55000900 | -0.79422200 |
| C | -4.85386600 | -3.65874400 | -0.38892400 |
| C | -5.30685300 | -3.77356700 | 0.92021700  |
| C | -5.00336700 | -2.76238100 | 1.82946200  |
| C | -4.19495200 | -1.66752400 | 1.48023300  |
| H | -0.07185500 | -1.01554300 | -5.69347100 |
| H | -5.38140400 | -2.81769000 | 2.84603500  |
| C | -3.92141200 | -2.57800800 | -2.31290100 |
| C | -5.09508100 | -1.83473600 | -3.03563600 |
| H | -5.20111000 | -0.83640600 | -2.59537600 |
| H | -6.05188600 | -2.35448200 | -2.92458900 |
| H | -6.08495900 | -4.56198700 | -1.92796000 |
| H | -4.89114100 | -5.66304100 | -1.24814300 |
| C | -1.39667800 | -1.87099600 | -2.69624000 |
| H | -2.46790000 | -1.00980400 | -6.32795900 |
| H | -5.89809000 | -4.63087600 | 1.23191200  |
| C | -4.63079900 | -1.70891000 | -4.50418400 |
| H | -5.05086400 | -0.82964900 | -5.00640400 |
| H | -4.93437400 | -2.58296900 | -5.09720700 |
| C | -5.05850300 | -4.61965600 | -1.53883900 |
| C | -4.03388500 | -4.11822000 | -2.57627800 |
| H | -3.05781200 | -4.57780800 | -2.38325800 |
| H | -4.31137000 | -4.34596600 | -3.61011200 |
| C | -3.96705100 | -0.60862500 | 2.51606400  |
| C | -3.22823000 | -0.90946800 | 3.68636900  |
| C | -4.61885300 | 0.64449300  | 2.39021900  |
| C | -2.52244400 | -2.14304700 | 3.85779600  |
| C | -3.16000500 | 0.05717700  | 4.76017500  |
| C | -4.52112100 | 1.61262500  | 3.46064600  |
| C | -1.82465300 | -2.41041800 | 5.00547900  |
| H | -2.51117900 | -2.85468300 | 3.04296800  |
| C | -2.43362500 | -0.26853100 | 5.94871600  |
| C | -3.80302700 | 1.29054700  | 4.61680100  |
| C | -1.78798800 | -1.46849000 | 6.07232900  |
| H | -1.27195100 | -3.34080300 | 5.09264000  |
| H | -2.40336700 | 0.46518000  | 6.75118400  |
| H | -3.75803800 | 2.01106700  | 5.43187300  |
| H | -1.23262600 | -1.70199700 | 6.97667100  |
| C | 1.05654900  | -1.48374400 | -3.31387400 |
| C | 1.77357200  | -0.27123200 | -3.47643700 |

|   |              |              |              |
|---|--------------|--------------|--------------|
| C | 1. 74302000  | -2. 66334400 | -2. 92936500 |
| C | 1. 14731700  | 0. 96380600  | -3. 84706500 |
| C | 3. 20332200  | -0. 24869000 | -3. 26211000 |
| C | 3. 16503800  | -2. 61340100 | -2. 67467900 |
| C | 1. 87423200  | 2. 11159400  | -4. 03656700 |
| H | 0. 07219600  | 0. 97902700  | -3. 97794800 |
| C | 3. 92806800  | 0. 96704500  | -3. 47963400 |
| C | 3. 85725700  | -1. 41266800 | -2. 85147800 |
| C | 3. 28819500  | 2. 11603300  | -3. 86109100 |
| H | 1. 36882500  | 3. 02796500  | -4. 33184400 |
| H | 5. 00601800  | 0. 95080900  | -3. 33669600 |
| H | 4. 92913400  | -1. 38072600 | -2. 66704000 |
| H | 3. 85107900  | 3. 02985500  | -4. 03131900 |
| C | -6. 05944600 | 2. 20380200  | 1. 17535700  |
| H | -6. 66701700 | 2. 43444800  | 0. 30480900  |
| C | -5. 42130100 | 0. 99356900  | 1. 25663300  |
| H | -5. 52911100 | 0. 27598400  | 0. 45169600  |
| C | -5. 93978600 | 3. 16226900  | 2. 22160300  |
| H | -6. 45690800 | 4. 11520900  | 2. 14299500  |
| C | -5. 19099000 | 2. 87016100  | 3. 33033300  |
| H | -5. 10676600 | 3. 58399600  | 4. 14705400  |
| C | 1. 78767900  | -5. 05440500 | -2. 42551100 |
| H | 1. 26744600  | -6. 00433000 | -2. 33669400 |
| C | 3. 18157000  | -4. 99124000 | -2. 14503200 |
| H | 3. 71104100  | -5. 88893800 | -1. 83779500 |
| C | 3. 84768900  | -3. 80314500 | -2. 27214500 |
| H | 4. 91479000  | -3. 73996000 | -2. 07327400 |
| C | 1. 09657100  | -3. 93418500 | -2. 80575700 |
| H | 0. 03749900  | -4. 00771500 | -3. 02279900 |
| C | -1. 12926400 | 4. 24072300  | -0. 15226900 |
| C | -1. 46416000 | 3. 50162600  | 1. 19880200  |
| H | -2. 30705000 | 4. 02565700  | 1. 67559500  |
| H | -1. 84548900 | 2. 50832900  | 0. 94833000  |
| C | -0. 40786700 | 3. 32888600  | 2. 26453000  |
| C | 0. 34193300  | 3. 95377400  | -0. 56555000 |
| H | 0. 99378200  | 4. 71065200  | -0. 13595000 |
| H | 0. 45191000  | 4. 04855300  | -1. 65001400 |
| N | 0. 85906300  | 2. 64613500  | -0. 15142000 |
| C | 2. 09497600  | 2. 42865100  | 0. 32909600  |
| N | 2. 55011300  | 1. 16510000  | 0. 35607700  |
| C | 3. 86421900  | 0. 77587400  | 0. 76920200  |
| C | 4. 95187200  | 1. 11508200  | -0. 03202400 |
| C | 4. 03819700  | -0. 01675900 | 1. 90520400  |
| C | 6. 22629500  | 0. 65547700  | 0. 30071400  |

|   |             |             |             |
|---|-------------|-------------|-------------|
| C | 5.32157300  | -0.45644700 | 2.23432900  |
| H | 3.18053900  | -0.30675800 | 2.50297500  |
| C | 6.41918500  | -0.12902900 | 1.43583600  |
| H | 7.40721100  | -0.49385600 | 1.68815100  |
| C | 5.52886300  | -1.25869400 | 3.49428300  |
| C | 7.35937500  | 0.95890600  | -0.64047900 |
| F | 5.69996300  | -0.45037700 | 4.56743800  |
| F | 6.63044700  | -2.03949800 | 3.41265100  |
| F | 4.47883500  | -2.05576400 | 3.76115300  |
| F | 7.19503200  | 0.31106500  | -1.82688700 |
| F | 8.55563100  | 0.58474000  | -0.14745100 |
| F | 7.42788500  | 2.27537000  | -0.93397200 |
| S | 3.02741700  | 3.72048800  | 1.03896200  |
| H | 4.79309000  | 1.70548900  | -0.92722000 |
| H | 1.94748600  | 0.38535700  | 0.06396900  |
| H | 0.32804400  | 1.81160800  | -0.46401500 |
| C | 0.50146500  | 4.30826200  | 2.66443600  |
| H | 0.32163400  | 5.34710100  | 2.39772300  |
| H | 1.60638500  | 4.07736600  | 1.93415000  |
| H | 0.96365000  | 4.17054100  | 3.64311000  |
| N | -0.80541800 | -1.44155700 | 1.13964800  |
| S | 0.68715300  | -1.82831700 | 1.51371100  |
| O | 1.03506900  | -1.38835200 | 2.87363800  |
| O | 1.67862100  | -1.54641400 | 0.44303200  |
| C | 0.64459700  | -3.69475200 | 1.61313800  |
| F | -0.20828900 | -4.09313700 | 2.57030100  |
| F | 1.86442800  | -4.15160400 | 1.91181200  |
| F | 0.25359400  | -4.21662900 | 0.44818300  |
| C | -2.16975800 | 3.74493900  | -1.18278800 |
| C | -1.83241800 | 2.96152700  | -2.29436200 |
| C | -3.52746900 | 4.06090400  | -1.00223400 |
| C | -2.80268900 | 2.54095300  | -3.20725200 |
| H | -0.81102100 | 2.64252000  | -2.45933400 |
| C | -4.49804800 | 3.64888500  | -1.91332800 |
| H | -3.84613600 | 4.63182900  | -0.13486700 |
| C | -4.13889300 | 2.89186200  | -3.02891200 |
| H | -2.50735000 | 1.92539800  | -4.05267000 |
| H | -5.53700700 | 3.92097100  | -1.74766200 |
| H | -4.89302400 | 2.57193200  | -3.74297100 |
| C | -1.26212200 | 5.79832200  | 0.02474800  |
| H | -2.31372100 | 6.02736100  | 0.23394700  |
| H | -0.70498800 | 6.08899800  | 0.91942400  |
| C | -0.40392100 | 2.00754800  | 2.96120500  |
| H | -0.41393300 | 1.16407200  | 2.26358200  |

|   |             |            |             |
|---|-------------|------------|-------------|
| H | 0.43438700  | 1.89561400 | 3.65306100  |
| H | -1.33723400 | 1.91414700 | 3.53834100  |
| C | -0.78298900 | 6.67434700 | -1.12177400 |
| C | 0.32969800  | 7.40738900 | -0.98945200 |
| H | 0.93051600  | 7.38874400 | -0.08306100 |
| H | 0.68048300  | 8.06077000 | -1.78441800 |
| C | -1.61780600 | 6.74453400 | -2.37896500 |
| H | -1.65638000 | 5.78275900 | -2.90177100 |
| H | -2.65770700 | 7.00791000 | -2.14578500 |
| H | -1.22118800 | 7.49503500 | -3.06971100 |

TS-EF-5R-3

l imaginary frequency

H = -5315.351926

G = -5315.553090

E(M06-2X-DCM) = -5316.240538

|   |             |             |             |
|---|-------------|-------------|-------------|
| O | -1.32376300 | -2.19605900 | -1.29282600 |
| O | -2.91791200 | -0.53872400 | -0.09665100 |
| P | -1.33635700 | -0.89916600 | -0.28887200 |
| O | -0.70117700 | 0.30646300  | -0.91396600 |
| C | -2.61802600 | -1.38653400 | -5.19138300 |
| C | -3.53362900 | -1.67090700 | -4.18295300 |
| C | -3.09153800 | -2.03156900 | -2.90107600 |
| C | -0.77491000 | -1.73706800 | -3.61636200 |
| C | -1.25323700 | -1.45877800 | -4.90854300 |
| C | -3.82438200 | -1.49485600 | 0.36125300  |
| C | -4.34484500 | -2.42791300 | -0.53732800 |
| C | -5.15541600 | -3.46568800 | -0.05031700 |
| C | -5.52904700 | -3.50938400 | 1.28812900  |
| C | -5.08704700 | -2.50419200 | 2.14583700  |
| C | -4.22019200 | -1.48551400 | 1.71355400  |
| H | -0.52911700 | -1.27152100 | -5.69605700 |
| H | -5.39682100 | -2.50727900 | 3.18656000  |
| C | -4.27043800 | -2.51076200 | -2.06164500 |
| C | -5.43245400 | -1.70831600 | -2.73872400 |
| H | -5.44992300 | -0.69490700 | -2.32074400 |
| H | -6.41305100 | -2.16014600 | -2.55969500 |
| H | -6.54112600 | -4.31842400 | -1.48406200 |
| H | -5.39035200 | -5.48499000 | -0.84040000 |
| C | -1.72999700 | -1.98977200 | -2.61167500 |
| H | -2.95427900 | -1.12094200 | -6.19058800 |
| H | -6.16246100 | -4.30912300 | 1.66353700  |
| C | -5.04669200 | -1.65016500 | -4.23402900 |
| H | -5.43869700 | -0.75919000 | -4.73805000 |

|   |             |             |             |
|---|-------------|-------------|-------------|
| H | -5.43902900 | -2.51800200 | -4.78240300 |
| C | -5.49967600 | -4.44065700 | -1.15433000 |
| C | -4.50670700 | -4.04583700 | -2.26669100 |
| H | -3.55577200 | -4.56949700 | -2.11598700 |
| H | -4.86246300 | -4.28293000 | -3.27415200 |
| C | -3.81545300 | -0.43786200 | 2.70455900  |
| C | -3.06906000 | -0.80895600 | 3.85085900  |
| C | -4.28862700 | 0.89181700  | 2.56514300  |
| C | -2.49933900 | -2.11247400 | 4.01446600  |
| C | -2.84166000 | 0.15685100  | 4.90246200  |
| C | -4.02786100 | 1.85597800  | 3.61164300  |
| C | -1.79177200 | -2.44489000 | 5.13921700  |
| H | -2.59758200 | -2.82967300 | 3.20988100  |
| C | -2.11527100 | -0.23745200 | 6.06981900  |
| C | -3.32986200 | 1.45877100  | 4.75658400  |
| C | -1.60861900 | -1.50255700 | 6.19037900  |
| H | -1.34538900 | -3.43151800 | 5.22085800  |
| H | -1.96743500 | 0.49844000  | 6.85704700  |
| H | -3.16594100 | 2.18014100  | 5.55550900  |
| H | -1.05006900 | -1.78804000 | 7.07766400  |
| C | 0.69885800  | -1.78052200 | -3.36241100 |
| C | 1.48620000  | -0.61597500 | -3.54369900 |
| C | 1.31757100  | -3.00658200 | -3.01051000 |
| C | 0.92923400  | 0.65700300  | -3.89686600 |
| C | 2.92013400  | -0.68701000 | -3.36809600 |
| C | 2.74742600  | -3.05396400 | -2.80826600 |
| C | 1.72491900  | 1.75466700  | -4.10521100 |
| H | -0.14576800 | 0.74474700  | -3.99904000 |
| C | 3.71460800  | 0.48361300  | -3.58753800 |
| C | 3.50825100  | -1.89728600 | -2.99412200 |
| C | 3.13950100  | 1.67099600  | -3.95421600 |
| H | 1.27359800  | 2.70122500  | -4.39259700 |
| H | 4.79183000  | 0.40551300  | -3.45742700 |
| H | 4.58631000  | -1.94285200 | -2.85402500 |
| H | 3.75448900  | 2.54931500  | -4.13184800 |
| C | -5.48263800 | 2.63133100  | 1.32598400  |
| H | -6.03765700 | 2.94186000  | 0.44583900  |
| C | -5.04715100 | 1.33652300  | 1.43443400  |
| H | -5.27606300 | 0.62926100  | 0.64636800  |
| C | -5.20772700 | 3.57940100  | 2.35208300  |
| H | -5.56668300 | 4.60036900  | 2.25224400  |
| C | -4.50679600 | 3.19634600  | 3.46410300  |
| H | -4.30573600 | 3.90424200  | 4.26554000  |
| C | 1.22024900  | -5.40069700 | -2.52772800 |



|   |             |             |             |
|---|-------------|-------------|-------------|
| H | 0.64136800  | -6.31490100 | -2.42721800 |
| C | 2.62517400  | -5.43390200 | -2.30206700 |
| H | 3.10482200  | -6.36843500 | -2.02423100 |
| C | 3.36400900  | -4.29126600 | -2.44407500 |
| H | 4.43965100  | -4.30171100 | -2.28521400 |
| C | 0.59185500  | -4.23250100 | -2.87079200 |
| H | -0.47746100 | -4.23248900 | -3.04701500 |
| C | -0.82337500 | 4.29139700  | -0.29273100 |
| C | -1.13606300 | 3.59453200  | 1.08360800  |
| H | -1.90990900 | 4.19464500  | 1.58528500  |
| H | -1.61476300 | 2.63707000  | 0.86172100  |
| C | -0.04290000 | 3.34132100  | 2.09393700  |
| C | 0.41333700  | 3.59862200  | -0.98697200 |
| H | 1.23392300  | 4.30937600  | -1.05606600 |
| H | 0.15363400  | 3.30299800  | -2.00505400 |
| N | 0.95977600  | 2.40004500  | -0.33797000 |
| C | 2.23992900  | 2.24858200  | 0.04068400  |
| N | 2.71239300  | 0.99864400  | 0.17858900  |
| C | 4.03554000  | 0.64565700  | 0.58283700  |
| C | 4.21731500  | -0.16481700 | 1.70520500  |
| C | 5.12536100  | 1.03034300  | -0.19812000 |
| C | 5.50919500  | -0.56975300 | 2.04788800  |
| C | 6.40892500  | 0.61764200  | 0.15655300  |
| H | 4.96301800  | 1.61684400  | -1.09458700 |
| C | 6.60873700  | -0.18114900 | 1.28207200  |
| H | 7.60441400  | -0.51542300 | 1.54637000  |
| C | 7.57245700  | 1.05523300  | -0.69288800 |
| C | 5.71601700  | -1.39771700 | 3.29152700  |
| F | 7.26622000  | 1.00193400  | -2.01304400 |
| F | 8.66138900  | 0.28348700  | -0.49862800 |
| F | 7.93305800  | 2.33078600  | -0.43076300 |
| F | 5.77955000  | -0.61652600 | 4.39523300  |
| F | 6.87095200  | -2.09884700 | 3.23839600  |
| F | 4.71221000  | -2.27340300 | 3.48252700  |
| S | 3.20012000  | 3.63450100  | 0.49454600  |
| H | 3.35980000  | -0.48869800 | 2.28668800  |
| H | 2.09445600  | 0.18855000  | 0.01570000  |
| H | 0.41473600  | 1.53363100  | -0.51550200 |
| C | 0.93414000  | 4.26573900  | 2.44387500  |
| H | 0.78144900  | 5.31852800  | 2.22146400  |
| H | 1.94123300  | 4.02373600  | 1.53373600  |
| H | 1.49882700  | 4.07008600  | 3.35585000  |
| N | -0.83588400 | -1.44033700 | 1.14697900  |
| S | 0.66740900  | -1.83672500 | 1.45575100  |

|   |             |             |             |
|---|-------------|-------------|-------------|
| O | 1.09586300  | -1.35850000 | 2.77868100  |
| O | 1.61025400  | -1.59773600 | 0.32778900  |
| C | 0.61093100  | -3.69885800 | 1.60882000  |
| F | -0.21040700 | -4.05700700 | 2.60615900  |
| F | 1.83689100  | -4.15857300 | 1.87610300  |
| F | 0.17382900  | -4.24607300 | 0.47291900  |
| C | -2.12340900 | 4.11789800  | -1.11460600 |
| C | -2.35656300 | 2.96317200  | -1.87905800 |
| C | -3.15669800 | 5.06558100  | -1.03755000 |
| C | -3.55404100 | 2.78631800  | -2.57441000 |
| H | -1.62894400 | 2.15961500  | -1.90920700 |
| C | -4.35359200 | 4.89180000  | -1.73417500 |
| H | -3.03468900 | 5.96099100  | -0.44060900 |
| C | -4.55556100 | 3.75462500  | -2.51598200 |
| H | -3.69753800 | 1.87907200  | -3.15544700 |
| H | -5.12627200 | 5.65338100  | -1.66549800 |
| H | -5.48444800 | 3.62225700  | -3.06471600 |
| C | -0.47695200 | 5.81048900  | -0.08246400 |
| H | -1.11135200 | 6.21849700  | 0.71244300  |
| H | 0.55036700  | 5.85652900  | 0.29844200  |
| C | -0.08639300 | 2.02029600  | 2.79346300  |
| H | -0.26543900 | 1.18149700  | 2.11593100  |
| H | 0.81172400  | 1.82395100  | 3.38448000  |
| H | -0.94583100 | 2.02564700  | 3.48244400  |
| C | -0.54624300 | 6.76044400  | -1.27132000 |
| C | -1.13108400 | 7.95615100  | -1.13806800 |
| H | -1.62004100 | 8.26005700  | -0.21508400 |
| H | -1.13998900 | 8.67998900  | -1.94885200 |
| C | 0.13148100  | 6.37292400  | -2.56297800 |
| H | 1.19984600  | 6.16603500  | -2.41451800 |
| H | -0.31662400 | 5.46998400  | -2.99576800 |
| H | 0.04628200  | 7.17388100  | -3.30314500 |

TS-EF-5R-4

l imaginary frequency

H = -5315.348102

G = -5315.548502

E(M06-2X-DCM) = -5316.235903

|   |             |             |             |
|---|-------------|-------------|-------------|
| O | -1.22401500 | -2.49632200 | -0.84641900 |
| O | -2.91480700 | -0.69508700 | -0.06237900 |
| P | -1.31445200 | -1.01335600 | -0.15500900 |
| O | -0.73016400 | 0.06371000  | -1.01972500 |
| C | -2.50795000 | -2.67017900 | -4.82703200 |
| C | -3.42061900 | -2.76662900 | -3.78142400 |

|   |             |             |             |
|---|-------------|-------------|-------------|
| C | -2.97829400 | -2.79789300 | -2.45037800 |
| C | -0.67074800 | -2.54986600 | -3.21194400 |
| C | -1.14542100 | -2.59957300 | -4.53403800 |
| C | -3.78563700 | -1.56229500 | 0.59771600  |
| C | -4.24450500 | -2.70362900 | -0.06164400 |
| C | -5.01141200 | -3.63973300 | 0.65043400  |
| C | -5.40724900 | -3.38806300 | 1.95932600  |
| C | -5.03122800 | -2.18836200 | 2.56053400  |
| C | -4.20610600 | -1.25676100 | 1.90728300  |
| H | -0.42156000 | -2.55710100 | -5.34260800 |
| H | -5.36003700 | -1.96385200 | 3.57077300  |
| C | -4.14189700 | -3.13465000 | -1.52439400 |
| C | -5.33582600 | -2.57707600 | -2.37113400 |
| H | -5.41670700 | -1.49743000 | -2.19736800 |
| H | -6.29271300 | -3.03069300 | -2.09484700 |
| H | -6.32552000 | -4.87942000 | -0.54983900 |
| H | -5.12613400 | -5.79737700 | 0.35449400  |
| C | -1.62470400 | -2.61676200 | -2.17774100 |
| H | -2.84447300 | -2.65815000 | -5.86073600 |
| H | -6.00742900 | -4.10966400 | 2.50777600  |
| C | -4.93148000 | -2.84160900 | -3.83885100 |
| H | -5.36258000 | -2.11252300 | -4.53458700 |
| H | -5.26925000 | -3.83221700 | -4.17412300 |
| C | -5.28492800 | -4.86320600 | -0.19617200 |
| C | -4.29473800 | -4.68557900 | -1.36585300 |
| H | -3.32065100 | -5.10724600 | -1.09283400 |
| H | -4.62087200 | -5.16998100 | -2.29145300 |
| C | -3.86372100 | 0.01295500  | 2.62368700  |
| C | -3.11749400 | -0.04074900 | 3.82744400  |
| C | -4.38694300 | 1.24950900  | 2.16679700  |
| C | -2.49855600 | -1.24198900 | 4.30157500  |
| C | -2.93986800 | 1.15875800  | 4.61500200  |
| C | -4.17180500 | 2.44814200  | 2.94745300  |
| C | -1.79163500 | -1.26431800 | 5.47456700  |
| H | -2.55868600 | -2.13555400 | 3.69382100  |
| C | -2.21273000 | 1.08715700  | 5.84475600  |
| C | -3.47292400 | 2.36708500  | 4.15607200  |
| C | -1.65839000 | -0.08984800 | 6.26797000  |
| H | -1.30756100 | -2.18306100 | 5.79236600  |
| H | -2.10316300 | 1.99642400  | 6.43158300  |
| H | -3.34333500 | 3.26655400  | 4.75577600  |
| H | -1.09974600 | -0.13005600 | 7.19911700  |
| C | 0.80038600  | -2.46199200 | -2.95362000 |
| C | 1.53233400  | -1.32966000 | -3.38994100 |

|   |              |              |              |
|---|--------------|--------------|--------------|
| C | 1. 47383200  | -3. 54878700 | -2. 34103800 |
| C | 0. 91596800  | -0. 19269900 | -4. 00871400 |
| C | 2. 96742600  | -1. 29344200 | -3. 21266800 |
| C | 2. 90316900  | -3. 48253300 | -2. 14015500 |
| C | 1. 66005100  | 0. 86753500  | -4. 45994400 |
| H | -0. 16238800 | -0. 17645300 | -4. 11240100 |
| C | 3. 70664900  | -0. 16493000 | -3. 69193300 |
| C | 3. 60991900  | -2. 36198800 | -2. 58329200 |
| C | 3. 07689200  | 0. 88395000  | -4. 30714600 |
| H | 1. 16503500  | 1. 70706800  | -4. 94169800 |
| H | 4. 78640100  | -0. 16366800 | -3. 55836600 |
| H | 4. 68844600  | -2. 32549800 | -2. 44387200 |
| H | 3. 65026000  | 1. 72888700  | -4. 67937800 |
| C | -5. 63371600 | 2. 58933400  | 0. 54235700  |
| H | -6. 19743200 | 2. 65507800  | -0. 38374600 |
| C | -5. 15320300 | 1. 37686600  | 0. 96329100  |
| H | -5. 35330800 | 0. 48974100  | 0. 37423400  |
| C | -5. 40041200 | 3. 76877500  | 1. 30514800  |
| H | -5. 79558500 | 4. 72047800  | 0. 95981500  |
| C | -4. 69613200 | 3. 69378800  | 2. 47709700  |
| H | -4. 52825000 | 4. 58241400  | 3. 08199600  |
| C | 1. 48637600  | -5. 77712900 | -1. 33666700 |
| H | 0. 95047400  | -6. 67211900 | -1. 03205700 |
| C | 2. 88998400  | -5. 69307100 | -1. 11610300 |
| H | 3. 41140200  | -6. 51849300 | -0. 63924300 |
| C | 3. 57510900  | -4. 57725500 | -1. 51261400 |
| H | 4. 64907400  | -4. 50135100 | -1. 36037400 |
| C | 0. 80580900  | -4. 74572400 | -1. 92856200 |
| H | -0. 26128900 | -4. 83536200 | -2. 09511400 |
| C | -0. 84707400 | 4. 12328900  | -1. 26542100 |
| C | -1. 18185700 | 3. 67343600  | 0. 19982100  |
| H | -1. 98030500 | 4. 31642700  | 0. 58729600  |
| H | -1. 63047400 | 2. 67953400  | 0. 14200000  |
| C | -0. 10624300 | 3. 62091400  | 1. 25840900  |
| C | 0. 33812000  | 3. 22431300  | -1. 83448200 |
| H | 1. 14363400  | 3. 86726400  | -2. 18963100 |
| H | -0. 03075400 | 2. 64969700  | -2. 68565000 |
| N | 0. 93645100  | 2. 23787300  | -0. 92705500 |
| C | 2. 21607800  | 2. 21708500  | -0. 52313900 |
| N | 2. 72324900  | 1. 04659100  | -0. 10112600 |
| C | 4. 05121300  | 0. 83273000  | 0. 37554500  |
| C | 5. 13800900  | 1. 06987700  | -0. 46606800 |
| C | 4. 24453400  | 0. 30278700  | 1. 65305900  |
| C | 6. 42954600  | 0. 79360100  | -0. 02015800 |

|   |             |             |             |
|---|-------------|-------------|-------------|
| C | 5.54439800  | 0.03105600  | 2.08533300  |
| H | 3.39142500  | 0.10088300  | 2.29317800  |
| C | 6.64049000  | 0.27638300  | 1.25770600  |
| H | 7.64445400  | 0.05919700  | 1.60149500  |
| C | 5.75829900  | -0.58722900 | 3.44441500  |
| C | 7.59215900  | 1.08172800  | -0.93255300 |
| F | 5.64340800  | -1.93211700 | 3.40049600  |
| F | 4.85909900  | -0.13836900 | 4.34278700  |
| F | 6.99163800  | -0.31108600 | 3.92696600  |
| F | 7.29509400  | 0.77736500  | -2.21975700 |
| F | 8.68985400  | 0.37545500  | -0.59179500 |
| F | 7.93507600  | 2.38852300  | -0.91167500 |
| S | 3.12221300  | 3.70316300  | -0.39206600 |
| H | 4.96887500  | 1.43827200  | -1.47079600 |
| H | 2.12762200  | 0.20418900  | -0.07238000 |
| H | 0.41725100  | 1.33948000  | -0.89888900 |
| C | 0.86110800  | 4.59840300  | 1.45816000  |
| H | 0.71161700  | 5.59986000  | 1.06444400  |
| H | 1.87831200  | 4.22906400  | 0.58321500  |
| H | 1.42057600  | 4.55802700  | 2.39296900  |
| N | -0.81382100 | -1.20296400 | 1.36803600  |
| S | 0.69612500  | -1.48075800 | 1.76236200  |
| O | 1.09951900  | -0.71705100 | 2.95246200  |
| O | 1.64398400  | -1.46479600 | 0.61311700  |
| C | 0.68645100  | -3.26552200 | 2.31808600  |
| F | 0.27689300  | -4.06082600 | 1.32810200  |
| F | -0.13752300 | -3.41713300 | 3.36487300  |
| F | 1.92036100  | -3.62122400 | 2.68746100  |
| C | -2.11280000 | 3.85616000  | -2.11993300 |
| C | -2.59726000 | 2.54084700  | -2.24738800 |
| C | -2.80143000 | 4.86996000  | -2.80078800 |
| C | -3.72618300 | 2.25760400  | -3.01377300 |
| H | -2.08956200 | 1.71247600  | -1.76130200 |
| C | -3.93514100 | 4.58590700  | -3.56878000 |
| H | -2.46657000 | 5.89803700  | -2.74399000 |
| C | -4.40560400 | 3.27992000  | -3.67896500 |
| H | -4.06654500 | 1.22829900  | -3.09117100 |
| H | -4.44409900 | 5.39661800  | -4.08411300 |
| H | -5.28444500 | 3.05951200  | -4.27942700 |
| C | -0.33582800 | 5.59520600  | -1.41734800 |
| H | 0.63757600  | 5.64204600  | -0.91938300 |
| H | -0.09868200 | 5.72467800  | -2.48025300 |
| C | -1.13184100 | 6.83155000  | -0.98973500 |
| C | -0.97423000 | 7.96356400  | -1.68851200 |

|   |             |            |             |
|---|-------------|------------|-------------|
| H | -0.35062600 | 8.01034600 | -2.57845100 |
| H | -1.46062200 | 8.88901500 | -1.39121000 |
| C | -0.16354900 | 2.45372800 | 2.19258500  |
| H | 0.72871100  | 2.36467000 | 2.81721200  |
| H | -1.02585000 | 2.59544300 | 2.86312900  |
| H | -0.34521800 | 1.50396100 | 1.68455800  |
| C | -2.02684400 | 6.82253300 | 0.22777900  |
| H | -2.40856700 | 7.82825400 | 0.42816400  |
| H | -2.89237000 | 6.16370700 | 0.08325000  |
| H | -1.50571300 | 6.47986700 | 1.13031100  |

TS-EF-5R-5

l imaginary frequency

H = -5315.352920

G = -5315.553818

E(M06-2X-DCM) = -5316.240214

|   |             |             |             |
|---|-------------|-------------|-------------|
| O | -1.35254000 | -2.44747000 | -0.82948500 |
| O | -2.99419600 | -0.59512600 | -0.06048100 |
| P | -1.40295500 | -0.95445400 | -0.15477300 |
| O | -0.79526500 | 0.10105800  | -1.02958400 |
| C | -2.65067600 | -2.64247500 | -4.80374000 |
| C | -3.56318500 | -2.69858000 | -3.75508800 |
| C | -3.11892800 | -2.72417500 | -2.42460900 |
| C | -0.80704900 | -2.55353000 | -3.19424500 |
| C | -1.28587300 | -2.60776500 | -4.51457500 |
| C | -3.88510000 | -1.43197300 | 0.61140200  |
| C | -4.37655200 | -2.56742800 | -0.03407500 |
| C | -5.16653700 | -3.47412900 | 0.69081400  |
| C | -5.55093800 | -3.19721500 | 1.99807200  |
| C | -5.14033300 | -2.00161700 | 2.58507500  |
| C | -4.29258200 | -1.10042500 | 1.91871100  |
| H | -0.56298300 | -2.59857800 | -5.32510300 |
| H | -5.45957100 | -1.75698800 | 3.59373800  |
| C | -4.28939500 | -3.01734900 | -1.49214900 |
| C | -5.46902600 | -2.43671500 | -2.34328800 |
| H | -5.51876800 | -1.35318300 | -2.18279800 |
| H | -6.43770800 | -2.85969300 | -2.05955000 |
| H | -6.51780100 | -4.69010000 | -0.49246700 |
| H | -5.34181700 | -5.63099400 | 0.41901400  |
| C | -1.76022100 | -2.57642800 | -2.15736800 |
| H | -2.98926100 | -2.63474900 | -5.83682200 |
| H | -6.16880100 | -3.89612500 | 2.55621100  |
| C | -5.07572900 | -2.73059300 | -3.80850600 |
| H | -5.48694400 | -1.99751900 | -4.51206500 |

|   |             |             |             |
|---|-------------|-------------|-------------|
| H | -5.44296200 | -3.71487300 | -4.13122900 |
| C | -5.47619500 | -4.69883200 | -0.14148500 |
| C | -4.48470100 | -4.56163800 | -1.31554700 |
| H | -3.52188700 | -5.00696500 | -1.04006300 |
| H | -4.82654600 | -5.04727600 | -2.23481600 |
| C | -3.91026500 | 0.16885100  | 2.61496400  |
| C | -3.15470800 | 0.11311600  | 3.81256000  |
| C | -4.39998100 | 1.41248200  | 2.14082700  |
| C | -2.57312700 | -1.09906800 | 4.30563700  |
| C | -2.92805800 | 1.32136000  | 4.57370600  |
| C | -4.13441100 | 2.61857900  | 2.89366700  |
| C | -1.85651000 | -1.12253300 | 5.47269500  |
| H | -2.67049600 | -2.00223600 | 3.71716300  |
| C | -2.19167200 | 1.24925800  | 5.79798000  |
| C | -3.42330500 | 2.53801900  | 4.09504900  |
| C | -1.67464400 | 0.06241100  | 6.24048600  |
| H | -1.40211900 | -2.05118400 | 5.80525400  |
| H | -2.04488400 | 2.16587800  | 6.36491800  |
| H | -3.25472700 | 3.44469100  | 4.67379600  |
| H | -1.10884300 | 0.02151600  | 7.16728800  |
| C | 0.66669600  | -2.51051800 | -2.93881900 |
| C | 1.43524800  | -1.40849300 | -3.38931500 |
| C | 1.30476200  | -3.61184500 | -2.31427500 |
| C | 0.85597600  | -0.26006400 | -4.02238500 |
| C | 2.87095800  | -1.41728500 | -3.21307900 |
| C | 2.73574100  | -3.59051400 | -2.11531900 |
| C | 1.63405700  | 0.76945100  | -4.48722400 |
| H | -0.22141800 | -0.21012400 | -4.12580100 |
| C | 3.64629100  | -0.31943700 | -3.70622700 |
| C | 3.47856900  | -2.49897600 | -2.57165400 |
| C | 3.05073900  | 0.74153000  | -4.33467200 |
| H | 1.16630300  | 1.61897900  | -4.97849000 |
| H | 4.72579900  | -0.35250100 | -3.57410300 |
| H | 4.55789600  | -2.49658800 | -2.43349100 |
| H | 3.65126500  | 1.56245500  | -4.71768300 |
| C | -5.62835200 | 2.75977300  | 0.50893800  |
| H | -6.20783600 | 2.82531700  | -0.40755600 |
| C | -5.18078500 | 1.54066300  | 0.94679700  |
| H | -5.42090200 | 0.64837200  | 0.38069400  |
| C | -5.34229300 | 3.94623000  | 1.24222100  |
| H | -5.70870300 | 4.90379400  | 0.88184300  |
| C | -4.62254700 | 3.87143900  | 2.40437900  |
| H | -4.41311900 | 4.76640500  | 2.98639800  |
| C | 1.24510700  | -5.82791600 | -1.28469500 |

|   |             |             |             |
|---|-------------|-------------|-------------|
| H | 0.68034700  | -6.70120400 | -0.96943500 |
| C | 2.65098500  | -5.78771300 | -1.06633100 |
| H | 3.14551900  | -6.62445600 | -0.58064000 |
| C | 3.37201100  | -4.69962200 | -1.47598900 |
| H | 4.44809900  | -4.65749400 | -1.32558100 |
| C | 0.59817500  | -4.78131000 | -1.88754400 |
| H | -0.47154700 | -4.83741900 | -2.05189200 |
| C | -0.64296700 | 4.13657500  | -1.29430400 |
| C | -1.01776000 | 3.76506200  | 0.18254400  |
| H | -1.72280200 | 4.51997400  | 0.55097400  |
| H | -1.57369900 | 2.82604700  | 0.16484800  |
| C | 0.06101700  | 3.64422600  | 1.23123400  |
| C | 0.43492200  | 3.11470900  | -1.86382900 |
| H | 1.25480900  | 3.67000300  | -2.32134000 |
| H | -0.02905700 | 2.50668400  | -2.64087900 |
| N | 1.01778400  | 2.14471700  | -0.92824200 |
| C | 2.29941800  | 2.08627000  | -0.54178600 |
| N | 2.77009500  | 0.90856800  | -0.09902200 |
| C | 4.08976600  | 0.65386600  | 0.37717800  |
| C | 5.18562800  | 0.85510100  | -0.46219200 |
| C | 4.26304700  | 0.11723500  | 1.65514300  |
| C | 6.46655900  | 0.53823900  | -0.01262700 |
| C | 5.55228500  | -0.19646400 | 2.09036700  |
| H | 3.40202500  | -0.05547700 | 2.29342800  |
| C | 6.65781100  | 0.01443400  | 1.26561200  |
| H | 7.65355900  | -0.23450700 | 1.61186400  |
| C | 5.74403600  | -0.82273400 | 3.44914900  |
| C | 7.64048900  | 0.78997400  | -0.92141200 |
| F | 5.60231600  | -2.16499600 | 3.39998800  |
| F | 4.84830400  | -0.35845700 | 4.34284300  |
| F | 6.97960700  | -0.57337000 | 3.94041500  |
| F | 7.33417300  | 0.50734200  | -2.21103400 |
| F | 8.71048000  | 0.04055000  | -0.58459400 |
| F | 8.03205500  | 2.08289300  | -0.88902400 |
| S | 3.25944000  | 3.54373500  | -0.45923900 |
| H | 5.03140500  | 1.22708500  | -1.46797700 |
| H | 2.14180800  | 0.08990100  | -0.04732700 |
| H | 0.46023100  | 1.27071100  | -0.86980900 |
| C | 1.06953200  | 4.57565300  | 1.41346900  |
| H | 0.95311600  | 5.57603300  | 1.00616000  |
| H | 2.07548300  | 4.13687000  | 0.50753800  |
| H | 1.64839800  | 4.51694100  | 2.33515200  |
| N | -0.90060000 | -1.14529900 | 1.36865800  |
| S | 0.59583500  | -1.48742400 | 1.75973200  |



|   |             |             |             |
|---|-------------|-------------|-------------|
| O | 1.04071500  | -0.73426500 | 2.94158900  |
| O | 1.53968400  | -1.52289800 | 0.60632600  |
| C | 0.51324900  | -3.26608000 | 2.32951600  |
| F | 0.06275600  | -4.05146000 | 1.34957000  |
| F | -0.30846900 | -3.37353900 | 3.38344100  |
| F | 1.73359100  | -3.67135500 | 2.69323800  |
| C | -1.92209300 | 3.98174500  | -2.16005800 |
| C | -2.56891600 | 2.73317800  | -2.22013800 |
| C | -2.44919300 | 5.02195700  | -2.93838000 |
| C | -3.69993200 | 2.54247100  | -3.01195700 |
| H | -2.18173900 | 1.88148500  | -1.66802900 |
| C | -3.58308200 | 4.83151000  | -3.73348700 |
| H | -1.99474200 | 6.00515900  | -2.92462800 |
| C | -4.21669100 | 3.59190300  | -3.77360400 |
| H | -4.16893800 | 1.56243300  | -3.03492000 |
| H | -3.96519400 | 5.66146200  | -4.32239500 |
| H | -5.09679500 | 3.44312300  | -4.39375600 |
| C | -0.00290400 | 5.55200600  | -1.44371400 |
| H | 1.03820500  | 5.47879100  | -1.11338800 |
| H | 0.08919200  | 5.75026400  | -2.52282900 |
| C | -0.58571200 | 6.79999200  | -0.79721500 |
| C | -1.83263600 | 6.95442100  | -0.33604100 |
| H | -2.58890100 | 6.17943200  | -0.39216500 |
| H | -2.14906600 | 7.89998900  | 0.09770400  |
| C | -0.05224000 | 2.48395300  | 2.16932500  |
| H | 0.84084800  | 2.34517800  | 2.78374300  |
| H | -0.89665600 | 2.67597700  | 2.84961400  |
| H | -0.29387000 | 1.54527300  | 1.66580500  |
| C | 0.39692200  | 7.95120700  | -0.74926400 |
| H | -0.05634900 | 8.85229800  | -0.32616100 |
| H | 1.28445900  | 7.70254700  | -0.15079900 |
| H | 0.76403600  | 8.19575900  | -1.75552500 |

TS-EF-5R-6

l imaginary frequency

H = -5315.349232

G = -5315.547590

E(M06-2X-DCM) = -5316.229792

|   |            |             |             |
|---|------------|-------------|-------------|
| O | 1.17073300 | -2.87482700 | -0.33841000 |
| O | 2.44737100 | -0.67212700 | -0.79298300 |
| P | 0.93873900 | -1.26889200 | -0.56005300 |
| O | 0.34655100 | -0.57671100 | 0.63030600  |
| C | 3.96887000 | -4.33079400 | 2.41655900  |
| C | 4.35865300 | -3.96195500 | 1.13363200  |

|   |              |              |              |
|---|--------------|--------------|--------------|
| C | 3. 41566100  | -3. 51376400 | 0. 19613600  |
| C | 1. 65399000  | -3. 75879600 | 1. 86825500  |
| C | 2. 62191900  | -4. 24591600 | 2. 76340000  |
| C | 3. 11602700  | -0. 96949600 | -1. 98237100 |
| C | 3. 67394300  | -2. 23203400 | -2. 16590200 |
| C | 4. 09203500  | -2. 61233000 | -3. 45016100 |
| C | 4. 09602000  | -1. 69133300 | -4. 49303900 |
| C | 3. 71267200  | -0. 37320500 | -4. 23408800 |
| C | 3. 21151600  | 0. 01788200  | -2. 98218500 |
| H | 2. 29837200  | -4. 55044100 | 3. 75447500  |
| H | 3. 78312800  | 0. 37538600  | -5. 01806600 |
| C | 4. 07864500  | -3. 30746100 | -1. 16208500 |
| C | 5. 56138000  | -3. 06082600 | -0. 70631300 |
| H | 5. 66903200  | -2. 00719800 | -0. 42369800 |
| H | 6. 28217300  | -3. 26685100 | -1. 50326700 |
| H | 5. 58441700  | -4. 18697100 | -3. 57359000 |
| H | 4. 03735400  | -4. 62521400 | -4. 28779100 |
| C | 2. 08445500  | -3. 36759900 | 0. 58569800  |
| H | 4. 69938100  | -4. 68176100 | 3. 14105100  |
| H | 4. 42142000  | -1. 97891400 | -5. 48971300 |
| C | 5. 74860900  | -3. 94824100 | 0. 53977800  |
| H | 6. 50098100  | -3. 55465400 | 1. 23270800  |
| H | 6. 07179800  | -4. 96241600 | 0. 26460800  |
| C | 4. 49735200  | -4. 07278000 | -3. 46027600 |
| C | 4. 01753000  | -4. 57368200 | -2. 07607800 |
| H | 2. 97734100  | -4. 91217300 | -2. 14167700 |
| H | 4. 61680800  | -5. 40222400 | -1. 68468000 |
| C | 2. 90828700  | 1. 45955800  | -2. 70905100 |
| C | 1. 82157900  | 2. 11200200  | -3. 33697600 |
| C | 3. 78961800  | 2. 19304400  | -1. 87273400 |
| C | 0. 89848300  | 1. 42491200  | -4. 18710400 |
| C | 1. 60790200  | 3. 52520400  | -3. 11453700 |
| C | 3. 55519300  | 3. 60160600  | -1. 64813900 |
| C | -0. 14096000 | 2. 08437800  | -4. 78880900 |
| H | 1. 01680200  | 0. 35843100  | -4. 32640200 |
| C | 0. 51385200  | 4. 17598100  | -3. 76668700 |
| C | 2. 47106200  | 4. 22760900  | -2. 27036100 |
| C | -0. 33371400 | 3. 48033000  | -4. 58561400 |
| H | -0. 83714200 | 1. 53188300  | -5. 41226600 |
| H | 0. 37413400  | 5. 24121500  | -3. 59612000 |
| H | 2. 29819200  | 5. 28659400  | -2. 09303000 |
| H | -1. 16129200 | 3. 98630700  | -5. 07617100 |
| C | 0. 22544600  | -3. 72781000 | 2. 31367700  |
| C | -0. 16325700 | -2. 86138000 | 3. 36375700  |

|   |             |             |             |
|---|-------------|-------------|-------------|
| C | -0.70372700 | -4.64937200 | 1.77151400  |
| C | 0.71554700  | -1.87675100 | 3.92224900  |
| C | -1.49938700 | -2.95157800 | 3.90791500  |
| C | -2.04600700 | -4.70721300 | 2.30411700  |
| C | 0.32163800  | -1.06800700 | 4.95741800  |
| H | 1.70843300  | -1.76340500 | 3.50385700  |
| C | -1.86677000 | -2.10011900 | 4.99874000  |
| C | -2.40284500 | -3.86807000 | 3.36327700  |
| C | -0.98483500 | -1.18709300 | 5.51379400  |
| H | 1.00825400  | -0.32482200 | 5.35076900  |
| H | -2.86675500 | -2.20258000 | 5.41556100  |
| H | -3.40651400 | -3.93751100 | 3.77928300  |
| H | -1.27327700 | -0.55503600 | 6.35015000  |
| C | 5.77422600  | 2.34860900  | -0.44967700 |
| H | 6.63981800  | 1.87669900  | 0.00785600  |
| C | 4.93973500  | 1.61040400  | -1.24808300 |
| H | 5.15618200  | 0.56292700  | -1.42288600 |
| C | 5.52320400  | 3.72967300  | -0.21479600 |
| H | 6.19270200  | 4.29936100  | 0.42417100  |
| C | 4.44503200  | 4.33507300  | -0.80183400 |
| H | 4.24283200  | 5.38915900  | -0.63391100 |
| C | -1.28572800 | -6.45292700 | 0.22942000  |
| H | -1.00249800 | -7.13428300 | -0.56827100 |
| C | -2.61193300 | -6.49195500 | 0.74531400  |
| H | -3.32828800 | -7.19924500 | 0.33604300  |
| C | -2.97607200 | -5.64440500 | 1.75564700  |
| H | -3.98340700 | -5.66870400 | 2.16508400  |
| C | -0.36622000 | -5.56734600 | 0.72625900  |
| H | 0.63979700  | -5.55603500 | 0.32386200  |
| C | -5.53896500 | 1.57561700  | 0.25912000  |
| C | -5.54147200 | 1.56398300  | 1.82666000  |
| H | -5.60468100 | 2.59966200  | 2.17768600  |
| H | -6.46914600 | 1.07784900  | 2.15694100  |
| C | -4.41499500 | 0.89324700  | 2.56057600  |
| C | -4.22693500 | 2.23185000  | -0.27009500 |
| H | -4.25360000 | 3.28531900  | 0.00938400  |
| H | -4.21886300 | 2.18657000  | -1.36148900 |
| N | -2.92442300 | 1.70401100  | 0.18023300  |
| C | -1.99814600 | 2.41255300  | 0.85866700  |
| N | -0.73175800 | 1.96219600  | 0.86158700  |
| C | 0.37742500  | 2.59797500  | 1.49296200  |
| C | 0.68616400  | 3.93546500  | 1.23334600  |
| C | 1.20426900  | 1.83322300  | 2.31857600  |
| C | 1.79764700  | 4.51651100  | 1.84100900  |

|   |              |              |              |
|---|--------------|--------------|--------------|
| C | 2. 32402200  | 2. 42580400  | 2. 90497000  |
| H | 0. 98147000  | 0. 78418300  | 2. 47220200  |
| C | 2. 62276400  | 3. 76843500  | 2. 68076800  |
| H | 3. 49956300  | 4. 21820500  | 3. 12951700  |
| C | 3. 18662600  | 1. 61010900  | 3. 83128800  |
| C | 2. 08563200  | 5. 97534400  | 1. 60674000  |
| F | 2. 65831400  | 1. 55867700  | 5. 08364500  |
| F | 4. 42721900  | 2. 12486100  | 3. 95562400  |
| F | 3. 31302500  | 0. 33284200  | 3. 41343100  |
| F | 1. 76454000  | 6. 35635200  | 0. 34663100  |
| F | 3. 39066700  | 6. 27175500  | 1. 79600400  |
| F | 1. 37649200  | 6. 76615800  | 2. 44318900  |
| S | -2. 46922400 | 3. 77387600  | 1. 85219200  |
| H | 0. 07924600  | 4. 51166000  | 0. 54648100  |
| H | -0. 51087500 | 1. 00759200  | 0. 51626900  |
| H | -2. 54342800 | 0. 97527300  | -0. 44498800 |
| C | -3. 80205500 | 1. 62930400  | 3. 57144500  |
| H | -4. 39834900 | 2. 39463500  | 4. 07439100  |
| H | -3. 17281800 | 2. 56422000  | 2. 83777000  |
| H | -3. 05397100 | 1. 14206100  | 4. 19552500  |
| N | 0. 16771100  | -1. 20205400 | -1. 98148900 |
| S | -1. 40632000 | -1. 15076900 | -2. 04572100 |
| O | -1. 95165700 | 0. 24186400  | -2. 03590700 |
| O | -2. 14768100 | -2. 10978400 | -1. 20908500 |
| C | -1. 68549300 | -1. 73455400 | -3. 79609500 |
| F | -1. 01869200 | -1. 00304100 | -4. 69606000 |
| F | -2. 99954500 | -1. 63628600 | -4. 06997000 |
| F | -1. 31816200 | -3. 00969700 | -3. 91939100 |
| C | -5. 87004800 | 0. 17838100  | -0. 29757200 |
| C | -7. 01836100 | -0. 49257200 | 0. 16618200  |
| C | -5. 11097900 | -0. 45275900 | -1. 28998100 |
| C | -7. 38588500 | -1. 73952700 | -0. 33276400 |
| H | -7. 65516300 | -0. 03695100 | 0. 92046900  |
| C | -5. 47243200 | -1. 70949400 | -1. 78792000 |
| H | -4. 21840300 | 0. 00918300  | -1. 69382300 |
| C | -6. 60920300 | -2. 35794600 | -1. 31471200 |
| H | -8. 28023400 | -2. 22681800 | 0. 04711800  |
| H | -4. 84294400 | -2. 17549600 | -2. 53707900 |
| H | -6. 88639600 | -3. 33487900 | -1. 70080300 |
| C | -6. 69290200 | 2. 58269400  | -0. 13456000 |
| H | -6. 50889500 | 3. 51556800  | 0. 41190300  |
| H | -7. 63340600 | 2. 17227600  | 0. 25457000  |
| C | -3. 99288500 | -0. 50878400 | 2. 26374700  |
| H | -3. 05387900 | -0. 76090200 | 2. 76002200  |

|   |             |             |             |
|---|-------------|-------------|-------------|
| H | -4.76986100 | -1.17990700 | 2.66346200  |
| H | -3.92140500 | -0.73677300 | 1.19937100  |
| C | -6.87574300 | 2.92589400  | -1.60455300 |
| C | -6.46298900 | 4.10952900  | -2.07530200 |
| H | -5.96852600 | 4.84279000  | -1.44232300 |
| H | -6.60986900 | 4.39160500  | -3.11481300 |
| C | -7.60182400 | 1.94160300  | -2.49127600 |
| H | -7.04830900 | 1.00442800  | -2.60790300 |
| H | -8.57687000 | 1.67605400  | -2.06124300 |
| H | -7.77212000 | 2.36425400  | -3.48619700 |

TS-EF-5R-7

0 imaginary frequency

H = 0.000000

G = -5316.575370

E(M06-2X-DCM) = -5316.245428

|   |            |             |             |
|---|------------|-------------|-------------|
| O | 1.13236500 | -2.80345900 | 0.15573300  |
| O | 2.87861300 | -0.94668000 | -0.25386600 |
| P | 1.27544200 | -1.18847000 | -0.09570100 |
| O | 0.80553800 | -0.37756900 | 1.06994900  |
| C | 3.07325700 | -4.39699900 | 3.50733600  |
| C | 3.74713600 | -4.24606700 | 2.29997000  |
| C | 3.08020000 | -3.76894000 | 1.16135500  |
| C | 1.03946000 | -3.50829100 | 2.47790900  |
| C | 1.72471200 | -4.04899300 | 3.57892600  |
| C | 3.56625900 | -1.53537900 | -1.31676300 |
| C | 3.94401200 | -2.87402800 | -1.23635500 |
| C | 4.46400400 | -3.50263900 | -2.37908700 |
| C | 4.72554800 | -2.77237000 | -3.53362300 |
| C | 4.46556200 | -1.40100100 | -3.54368800 |
| C | 3.86686200 | -0.75470400 | -2.45029200 |
| H | 1.18390200 | -4.16984100 | 4.51312300  |
| H | 4.70408700 | -0.81151500 | -4.42409500 |
| C | 3.99995000 | -3.83949100 | -0.05398900 |
| C | 5.39590200 | -3.75569200 | 0.65625700  |
| H | 5.62522800 | -2.70252900 | 0.85536800  |
| H | 6.20338500 | -4.16166200 | 0.03933000  |
| H | 5.71297100 | -5.24327500 | -2.02224600 |
| H | 4.26101500 | -5.59754700 | -2.95155100 |
| C | 1.75180700 | -3.36208200 | 1.27225800  |
| H | 3.58737400 | -4.77349800 | 4.38810100  |
| H | 5.13761000 | -3.25583100 | -4.41595000 |
| C | 5.20506900 | -4.50487500 | 1.99163300  |
| H | 5.87337600 | -4.14204100 | 2.78078300  |

|   |              |              |              |
|---|--------------|--------------|--------------|
| H | 5. 40357400  | -5. 58026500 | 1. 87935600  |
| C | 4. 65023000  | -4. 98476600 | -2. 13030700 |
| C | 3. 87954400  | -5. 20445800 | -0. 80862800 |
| H | 2. 82184400  | -5. 39591900 | -1. 02291700 |
| H | 4. 25967500  | -6. 04420500 | -0. 21807800 |
| C | 3. 60380400  | 0. 71712200  | -2. 49374300 |
| C | 2. 69333600  | 1. 25473900  | -3. 43660900 |
| C | 4. 31439000  | 1. 57869900  | -1. 61942400 |
| C | 1. 92803700  | 0. 44062100  | -4. 33286100 |
| C | 2. 49397600  | 2. 68566000  | -3. 49872400 |
| C | 4. 07641200  | 3. 00306500  | -1. 66983100 |
| C | 1. 07138500  | 0. 99596300  | -5. 24617400 |
| H | 2. 00695200  | -0. 63680800 | -4. 25790300 |
| C | 1. 59243200  | 3. 22482100  | -4. 46979800 |
| C | 3. 17542800  | 3. 51719600  | -2. 60643600 |
| C | 0. 90739100  | 2. 40788700  | -5. 32787400 |
| H | 0. 49276100  | 0. 35089500  | -5. 90121100 |
| H | 1. 46858800  | 4. 30490100  | -4. 51031800 |
| H | 2. 99593400  | 4. 58938900  | -2. 63536400 |
| H | 0. 22932400  | 2. 82993800  | -6. 06546800 |
| C | -0. 39828100 | -3. 12238500 | 2. 63601600  |
| C | -0. 74391600 | -2. 04365400 | 3. 48624500  |
| C | -1. 41145700 | -3. 88281300 | 2. 00353600  |
| C | 0. 23532100  | -1. 20650500 | 4. 11399200  |
| C | -2. 13642600 | -1. 74153400 | 3. 72896700  |
| C | -2. 80018800 | -3. 56335500 | 2. 24495900  |
| C | -0. 12830700 | -0. 17040900 | 4. 93477100  |
| H | 1. 28328500  | -1. 38999200 | 3. 91114100  |
| C | -2. 47374500 | -0. 65861900 | 4. 60201500  |
| C | -3. 12404700 | -2. 51111300 | 3. 10678100  |
| C | -1. 50270000 | 0. 10519800  | 5. 19103200  |
| H | 0. 63821000  | 0. 45705600  | 5. 38196300  |
| H | -3. 52651100 | -0. 45503200 | 4. 78633600  |
| H | -4. 17210100 | -2. 29376100 | 3. 30795600  |
| H | -1. 77372100 | 0. 92659100  | 5. 84888600  |
| C | 5. 94489500  | 1. 96435100  | 0. 16271200  |
| H | 6. 67490000  | 1. 57486500  | 0. 86712700  |
| C | 5. 28862800  | 1. 10744900  | -0. 68102100 |
| H | 5. 51196700  | 0. 04747400  | -0. 64498500 |
| C | 5. 68165300  | 3. 36278800  | 0. 12909000  |
| H | 6. 20684500  | 4. 02554200  | 0. 81167700  |
| C | 4. 77732700  | 3. 86420800  | -0. 76720400 |
| H | 4. 56533600  | 4. 92888000  | -0. 80807100 |
| C | -2. 12851900 | -5. 70976300 | 0. 54740800  |

|   |             |             |             |
|---|-------------|-------------|-------------|
| H | -1.88160500 | -6.54088500 | -0.10756000 |
| C | -3.49462500 | -5.38449900 | 0.78127300  |
| H | -4.27661100 | -5.96808400 | 0.30300400  |
| C | -3.81617100 | -4.34435200 | 1.61046200  |
| H | -4.85625700 | -4.09285500 | 1.80658700  |
| C | -1.12588100 | -4.98915000 | 1.14115200  |
| H | -0.09145200 | -5.25639000 | 0.95880600  |
| N | 0.64607600  | -0.94454300 | -1.57042300 |
| S | -0.86772900 | -1.12419200 | -1.94112500 |
| O | -1.32235000 | -0.15209800 | -2.95162800 |
| O | -1.78180800 | -1.31187000 | -0.77503200 |
| C | -0.94295500 | -2.76090300 | -2.84247700 |
| F | -0.12584100 | -2.73262300 | -3.90199300 |
| F | -2.19536700 | -2.97790000 | -3.27409300 |
| F | -0.58428300 | -3.76461700 | -2.04142000 |
| C | -5.09687400 | 0.47499400  | -0.43830300 |
| C | -4.44744200 | 1.02391100  | -1.73342800 |
| H | -5.13012500 | 0.84084100  | -2.57770900 |
| H | -3.57882100 | 0.40383200  | -1.97599500 |
| C | -4.01079100 | 2.45432700  | -1.83031600 |
| C | -4.19070000 | 0.80925900  | 0.81006300  |
| H | -4.56055100 | 1.69698400  | 1.32018500  |
| H | -4.24568200 | -0.02480900 | 1.51925500  |
| N | -2.77112400 | 1.03635400  | 0.52889200  |
| C | -2.03980400 | 2.06785800  | 1.00152500  |
| N | -0.70778100 | 1.89214700  | 1.05282900  |
| C | 0.27941100  | 2.86744100  | 1.36900800  |
| C | 0.35062400  | 4.09910800  | 0.71284200  |
| C | 1.24022300  | 2.52610600  | 2.32400200  |
| C | 1.35714400  | 5.00130800  | 1.05205600  |
| C | 2.24746300  | 3.43572200  | 2.64635100  |
| H | 1.19087500  | 1.55683200  | 2.80547700  |
| C | 2.30730800  | 4.68060200  | 2.02335000  |
| H | 3.07739100  | 5.39304500  | 2.29401900  |
| C | 3.29954700  | 3.05065400  | 3.65394700  |
| C | 1.45837200  | 6.31882700  | 0.33081500  |
| F | 2.80733800  | 2.21403900  | 4.59746300  |
| F | 4.34445900  | 2.42116500  | 3.07625700  |
| F | 3.79567300  | 4.13369100  | 4.29403500  |
| F | 1.85449100  | 7.31046900  | 1.15708800  |
| F | 2.36619500  | 6.27580000  | -0.68042700 |
| F | 0.28343300  | 6.68921500  | -0.22065900 |
| S | -2.78661100 | 3.56274500  | 1.48043200  |
| H | -0.37541000 | 4.35552200  | -0.04656500 |

|   |              |             |             |
|---|--------------|-------------|-------------|
| H | -0.31553000  | 0.92838300  | 0.99726400  |
| H | -2.25878600  | 0.21422400  | 0.17720800  |
| C | -4.50453900  | 3.48917800  | -1.03107500 |
| H | -5.46751900  | 3.34496400  | -0.54404900 |
| H | -3.75884300  | 3.49090300  | 0.00927800  |
| H | -4.32091900  | 4.50576900  | -1.38344400 |
| C | -5.15326800  | -1.09865700 | -0.57816000 |
| H | -5.53112100  | -1.48699900 | 0.37620800  |
| H | -4.12327800  | -1.45496000 | -0.67973100 |
| C | -6.52134900  | 0.99525800  | -0.16678700 |
| C | -7.09257700  | 0.82618900  | 1.10740200  |
| C | -7.32560600  | 1.57792100  | -1.15845300 |
| C | -8.40003200  | 1.22655700  | 1.38063200  |
| H | -6.51598500  | 0.36528800  | 1.90415000  |
| C | -8.63626000  | 1.98015700  | -0.89006600 |
| H | -6.93935200  | 1.72562900  | -2.16136300 |
| C | -9.18149600  | 1.80733600  | 0.38112000  |
| H | -8.80727900  | 1.08125700  | 2.37760700  |
| H | -9.22912800  | 2.42925200  | -1.68249700 |
| H | -10.20043600 | 2.12028400  | 0.59064900  |
| C | -5.99748000  | -1.66617400 | -1.70869800 |
| C | -5.46196300  | -1.92921900 | -2.90815000 |
| H | -4.41034200  | -1.76456300 | -3.12287600 |
| H | -6.05893700  | -2.35419700 | -3.71204400 |
| C | -2.95054600  | 2.73616000  | -2.84459700 |
| H | -2.62070700  | 3.77783900  | -2.82584500 |
| H | -2.09631300  | 2.05685900  | -2.73176500 |
| H | -3.35255600  | 2.52005300  | -3.84624900 |
| C | -7.43943800  | -2.00321900 | -1.40568000 |
| H | -7.49419600  | -2.75063800 | -0.60159400 |
| H | -8.00869700  | -1.13295300 | -1.06270600 |
| H | -7.94360900  | -2.41873800 | -2.28398500 |

TS-EF-5R-8

0 imaginary frequency

H = 0.000000

G = -5316.574116

E(M06-2X-DCM) = -5316.245286

|   |            |             |             |
|---|------------|-------------|-------------|
| O | 1.02842600 | -2.81743900 | 0.17948300  |
| O | 2.83393000 | -1.00740900 | -0.18704600 |
| P | 1.22146500 | -1.20702600 | -0.06720400 |
| O | 0.74695500 | -0.38634200 | 1.09063100  |
| C | 2.83196300 | -4.45081500 | 3.58807900  |
| C | 3.54381900 | -4.31962700 | 2.40033800  |



|   |              |              |              |
|---|--------------|--------------|--------------|
| C | 2. 92145900  | -3. 82995600 | 1. 24202900  |
| C | 0. 84991600  | -3. 51927900 | 2. 49748700  |
| C | 1. 49007700  | -4. 07223800 | 3. 61934000  |
| C | 3. 53266400  | -1. 61961100 | -1. 22969100 |
| C | 3. 87210100  | -2. 96767300 | -1. 13418500 |
| C | 4. 40500600  | -3. 61537400 | -2. 26024900 |
| C | 4. 71544900  | -2. 89826400 | -3. 41082600 |
| C | 4. 49326400  | -1. 52054200 | -3. 43293400 |
| C | 3. 88499200  | -0. 85290600 | -2. 35775900 |
| H | 0. 91929000  | -4. 17895500 | 4. 53728500  |
| H | 4. 77084400  | -0. 94158600 | -4. 30885600 |
| C | 3. 87213600  | -3. 92853800 | 0. 05320900  |
| C | 5. 24965200  | -3. 87685000 | 0. 80140200  |
| H | 5. 50010000  | -2. 82892900 | 1. 00270600  |
| H | 6. 06321600  | -4. 30598300 | 0. 20862700  |
| H | 5. 59973900  | -5. 38494000 | -1. 86328300 |
| H | 4. 16404000  | -5. 70735600 | -2. 82875200 |
| C | 1. 60085400  | -3. 39093500 | 1. 31360700  |
| H | 3. 31131600  | -4. 83653700 | 4. 48431400  |
| H | 5. 13702300  | -3. 39690400 | -4. 28010500 |
| C | 5. 00310800  | -4. 61501900 | 2. 13390700  |
| H | 5. 65776200  | -4. 26494100 | 2. 94007600  |
| H | 5. 17832600  | -5. 69541500 | 2. 03151800  |
| C | 4. 54702700  | -5. 10040300 | -2. 00028600 |
| C | 3. 73693000  | -5. 29383200 | -0. 69842400 |
| H | 2. 68063600  | -5. 45939600 | -0. 93962500 |
| H | 4. 07985400  | -6. 13995500 | -0. 09436200 |
| C | 3. 67124200  | 0. 62639600  | -2. 41413900 |
| C | 2. 80294300  | 1. 18849600  | -3. 38200100 |
| C | 4. 39267000  | 1. 46882200  | -1. 53016600 |
| C | 2. 02949500  | 0. 39465900  | -4. 28926200 |
| C | 2. 65817200  | 2. 62511100  | -3. 46052800 |
| C | 4. 20980000  | 2. 90059400  | -1. 59863000 |
| C | 1. 21503800  | 0. 97280600  | -5. 22675100 |
| H | 2. 06727400  | -0. 68419100 | -4. 20364500 |
| C | 1. 79979900  | 3. 18812900  | -4. 45678900 |
| C | 3. 35023100  | 3. 43908800  | -2. 56021200 |
| C | 1. 10508400  | 2. 38899300  | -5. 32378000 |
| H | 0. 62817500  | 0. 34346100  | -5. 88966300 |
| H | 1. 71659500  | 4. 27157800  | -4. 50903300 |
| H | 3. 21223300  | 4. 51685200  | -2. 60305300 |
| H | 0. 45996800  | 2. 82891900  | -6. 08023000 |
| C | -0. 58408300 | -3. 10527200 | 2. 61046500  |
| C | -0. 93515400 | -2. 01750700 | 3. 44662300  |

|   |             |             |             |
|---|-------------|-------------|-------------|
| C | -1.59148500 | -3.84853600 | 1.94881100  |
| C | 0.04041900  | -1.19456100 | 4.09840100  |
| C | -2.32865800 | -1.69097100 | 3.64869400  |
| C | -2.98072900 | -3.50279100 | 2.14707100  |
| C | -0.32827100 | -0.14856100 | 4.90409500  |
| H | 1.09023600  | -1.39687200 | 3.92545600  |
| C | -2.67168100 | -0.59965800 | 4.50919400  |
| C | -3.31115800 | -2.44453300 | 2.99917600  |
| C | -1.70443200 | 0.15057800  | 5.12165200  |
| H | 0.43609900  | 0.46761800  | 5.37047100  |
| H | -3.72561800 | -0.37893300 | 4.66526200  |
| H | -4.36068500 | -2.20855000 | 3.16868100  |
| H | -1.97969500 | 0.97865200  | 5.76930400  |
| C | 5.99608000  | 1.81016100  | 0.28530600  |
| H | 6.69463000  | 1.40033800  | 1.00979300  |
| C | 5.32678300  | 0.97035400  | -0.56534600 |
| H | 5.50882000  | -0.09687800 | -0.51451800 |
| C | 5.78744400  | 3.21718100  | 0.23265300  |
| H | 6.32230900  | 3.86636900  | 0.92073500  |
| C | 4.92295400  | 3.74349400  | -0.68833200 |
| H | 4.75290500  | 4.81496700  | -0.74378200 |
| C | -2.29740500 | -5.66261100 | 0.47115900  |
| H | -2.04590600 | -6.49946400 | -0.17473700 |
| C | -3.66369300 | -5.30957200 | 0.66013500  |
| H | -4.44180300 | -5.87844900 | 0.15828600  |
| C | -3.99140200 | -4.26320000 | 1.47953600  |
| H | -5.03207300 | -3.99127800 | 1.64116600  |
| C | -1.30034100 | -4.96157400 | 1.09693600  |
| H | -0.26612900 | -5.24960600 | 0.94819500  |
| N | 0.63253600  | -0.94053700 | -1.55318300 |
| S | -0.86691500 | -1.11695700 | -1.98275200 |
| O | -1.26883600 | -0.15634600 | -3.02540800 |
| O | -1.83033300 | -1.27829100 | -0.85366100 |
| C | -0.90414300 | -2.76552800 | -2.86877000 |
| F | -0.00299300 | -2.76529300 | -3.85824600 |
| F | -2.11978100 | -2.96611900 | -3.40122400 |
| F | -0.63162200 | -3.76644600 | -2.03072100 |
| C | -5.09517600 | 0.57760300  | -0.42397100 |
| C | -4.45132000 | 1.04945600  | -1.75223600 |
| H | -5.15800100 | 0.86356700  | -2.57586500 |
| H | -3.60249200 | 0.39743200  | -1.97978600 |
| C | -3.98011400 | 2.46612300  | -1.91189300 |
| C | -4.16115100 | 0.94298900  | 0.79244300  |
| H | -4.50009500 | 1.85885800  | 1.27252900  |

|   |               |              |              |
|---|---------------|--------------|--------------|
| H | -4. 22109100  | 0. 14033700  | 1. 53663100  |
| N | -2. 74159300  | 1. 12727100  | 0. 47635700  |
| C | -1. 98202200  | 2. 15397100  | 0. 91768500  |
| N | -0. 65660800  | 1. 94421500  | 0. 98227300  |
| C | 0. 35055600   | 2. 89620700  | 1. 30762300  |
| C | 0. 47376600   | 4. 11593500  | 0. 63718500  |
| C | 1. 27291100   | 2. 54275400  | 2. 29552600  |
| C | 1. 49305000   | 4. 99615300  | 0. 99579000  |
| C | 2. 29361800   | 3. 43001500  | 2. 63692400  |
| H | 1. 18270500   | 1. 58218500  | 2. 78861000  |
| C | 2. 40436400   | 4. 66434900  | 2. 00017300  |
| H | 3. 18365100   | 5. 36081300  | 2. 28591400  |
| C | 3. 30237900   | 3. 03208900  | 3. 68309800  |
| C | 1. 64942800   | 6. 30348200  | 0. 26556300  |
| F | 2. 75919100   | 2. 21756400  | 4. 61758600  |
| F | 4. 35103000   | 2. 37249200  | 3. 14719000  |
| F | 3. 80194200   | 4. 11058900  | 4. 32806400  |
| F | 2. 02026100   | 7. 29820300  | 1. 10000300  |
| F | 2. 60539600   | 6. 23566600  | -0. 69893900 |
| F | 0. 50893700   | 6. 68513100  | -0. 34643800 |
| S | -2. 69128700  | 3. 68423000  | 1. 33754600  |
| H | -0. 22237700  | 4. 38050100  | -0. 14694700 |
| H | -0. 29313200  | 0. 96695800  | 0. 95994900  |
| H | -2. 25179800  | 0. 28374300  | 0. 14643800  |
| C | -4. 44228500  | 3. 54092000  | -1. 14795200 |
| H | -5. 40161200  | 3. 43509200  | -0. 64386700 |
| H | -3. 68347200  | 3. 57038000  | -0. 11754700 |
| H | -4. 24222500  | 4. 53876100  | -1. 54242600 |
| C | -5. 20479900  | -0. 99802500 | -0. 47031900 |
| H | -5. 67767300  | -1. 29963300 | 0. 47093500  |
| H | -4. 18678000  | -1. 40172800 | -0. 45921200 |
| C | -6. 50195500  | 1. 14915300  | -0. 15886000 |
| C | -7. 04648000  | 1. 08178500  | 1. 13647900  |
| C | -7. 31922700  | 1. 67662900  | -1. 16973300 |
| C | -8. 33659300  | 1. 53364400  | 1. 41206800  |
| H | -6. 46253200  | 0. 66230200  | 1. 95064600  |
| C | -8. 61114900  | 2. 13370300  | -0. 89900200 |
| H | -6. 95821700  | 1. 74062500  | -2. 19043800 |
| C | -9. 12769500  | 2. 06609300  | 0. 39343200  |
| H | -8. 72172700  | 1. 46780700  | 2. 42611000  |
| H | -9. 21321300  | 2. 53942200  | -1. 70768800 |
| H | -10. 13261300 | 2. 42063900  | 0. 60462100  |
| C | -5. 97316200  | -1. 61181800 | -1. 63189800 |
| C | -7. 30796400  | -1. 71328200 | -1. 61660600 |

|   |             |             |             |
|---|-------------|-------------|-------------|
| H | -7.90654200 | -1.35379000 | -0.78448500 |
| H | -7.85050800 | -2.17076500 | -2.44079300 |
| C | -2.92963000 | 2.68500700  | -2.95048000 |
| H | -2.58150400 | 3.72041600  | -2.98004600 |
| H | -2.08547200 | 1.99579200  | -2.82102000 |
| H | -3.34889600 | 2.43393800  | -3.93687400 |
| C | -5.15545500 | -2.18032700 | -2.76763000 |
| H | -4.49071500 | -1.43724400 | -3.22381600 |
| H | -4.49933100 | -2.97984900 | -2.40280700 |
| H | -5.79629200 | -2.59368700 | -3.55316400 |

TS-EF-5R-9

l imaginary frequency

H = -5315.358555

G = -5315.558702

E(M06-2X-DCM) = -5316.241518

|   |            |             |             |
|---|------------|-------------|-------------|
| O | 2.05584300 | -2.38381100 | -0.31934000 |
| O | 2.72598100 | 0.07410900  | -0.75992500 |
| P | 1.43438800 | -0.86892700 | -0.42681400 |
| O | 0.83588000 | -0.38890300 | 0.85490200  |
| C | 4.91887900 | -3.03475600 | 2.67397700  |
| C | 5.28948000 | -2.52470800 | 1.43466600  |
| C | 4.34338200 | -2.37416000 | 0.40901400  |
| C | 2.59969000 | -3.19099500 | 1.90845400  |
| C | 3.58769200 | -3.38921000 | 2.88792700  |
| C | 3.45830000 | -0.11381900 | -1.93210800 |
| C | 4.41034500 | -1.13053800 | -1.98834800 |
| C | 5.02204400 | -1.42872700 | -3.21591300 |
| C | 4.78621800 | -0.63849900 | -4.33553000 |
| C | 3.93373500 | 0.45914400  | -4.22092200 |
| C | 3.23881800 | 0.74008700  | -3.03182700 |
| H | 3.28722800 | -3.81063200 | 3.84274800  |
| H | 3.77650300 | 1.11133200  | -5.07477000 |
| C | 5.04186000 | -1.97723500 | -0.88693100 |
| C | 6.31248600 | -1.26504800 | -0.30712100 |
| H | 6.04899900 | -0.23285700 | -0.04906500 |
| H | 7.13606300 | -1.22887200 | -1.02683800 |
| H | 6.96384000 | -2.39245000 | -3.10610300 |
| H | 5.73905200 | -3.36827400 | -3.90935300 |
| C | 3.00216100 | -2.64786900 | 0.67271800  |
| H | 5.65189700 | -3.15872200 | 3.46712400  |
| H | 5.26790600 | -0.85902600 | -5.28489300 |
| C | 6.65094900 | -2.04985600 | 0.97755300  |
| H | 7.15530400 | -1.43314500 | 1.73014500  |

|   |              |              |              |
|---|--------------|--------------|--------------|
| H | 7. 31820200  | -2. 89729800 | 0. 76552300  |
| C | 5. 89731900  | -2. 65747000 | -3. 09009000 |
| C | 5. 47904300  | -3. 22947400 | -1. 71727700 |
| H | 4. 61353200  | -3. 89088800 | -1. 83848400 |
| H | 6. 27145500  | -3. 80185400 | -1. 22476800 |
| C | 2. 35503800  | 1. 94587500  | -2. 97453500 |
| C | 1. 25172000  | 2. 05887200  | -3. 85815600 |
| C | 2. 68654100  | 3. 02363600  | -2. 11297900 |
| C | 0. 83560700  | 0. 99562600  | -4. 72350300 |
| C | 0. 49178000  | 3. 28864500  | -3. 90080200 |
| C | 1. 88406100  | 4. 22622300  | -2. 13055600 |
| C | -0. 20580300 | 1. 15241100  | -5. 59971700 |
| H | 1. 34139600  | 0. 04055400  | -4. 65558000 |
| C | -0. 58158500 | 3. 41588500  | -4. 83882100 |
| C | 0. 81990800  | 4. 33070200  | -3. 03007800 |
| C | -0. 91621400 | 2. 38380800  | -5. 67406100 |
| H | -0. 50587800 | 0. 32238800  | -6. 23288300 |
| H | -1. 11970700 | 4. 36092000  | -4. 87759900 |
| H | 0. 24097700  | 5. 25217100  | -3. 06049500 |
| H | -1. 72760300 | 2. 49565200  | -6. 38905100 |
| C | 1. 19099500  | -3. 59149800 | 2. 21319100  |
| C | 0. 46982300  | -2. 91547400 | 3. 22732500  |
| C | 0. 61947400  | -4. 71036900 | 1. 55833500  |
| C | 0. 98531900  | -1. 77042300 | 3. 91816300  |
| C | -0. 84764700 | -3. 38071200 | 3. 59777800  |
| C | -0. 70649700 | -5. 15212600 | 1. 92546400  |
| C | 0. 27161600  | -1. 15420000 | 4. 91369900  |
| H | 1. 95681000  | -1. 38152600 | 3. 63731500  |
| C | -1. 55971600 | -2. 70817600 | 4. 64093200  |
| C | -1. 39924000 | -4. 48132400 | 2. 93712300  |
| C | -1. 01803400 | -1. 63031200 | 5. 28690300  |
| H | 0. 69224200  | -0. 28786900 | 5. 41595300  |
| H | -2. 54599300 | -3. 07935100 | 4. 91083700  |
| H | -2. 38946000 | -4. 83056900 | 3. 22306100  |
| H | -1. 56784400 | -1. 13077400 | 6. 08018600  |
| C | 4. 09394500  | 4. 05180600  | -0. 39618400 |
| H | 4. 94998800  | 3. 99680200  | 0. 27093100  |
| C | 3. 81174400  | 2. 99926700  | -1. 22701700 |
| H | 4. 45423000  | 2. 12711400  | -1. 21859100 |
| C | 3. 27540500  | 5. 21636000  | -0. 39161400 |
| H | 3. 49952100  | 6. 03441500  | 0. 28650300  |
| C | 2. 20627900  | 5. 29926200  | -1. 24173700 |
| H | 1. 57290500  | 6. 18231400  | -1. 25002100 |
| C | 0. 73455200  | -6. 54388300 | -0. 05444700 |

|   |             |             |             |
|---|-------------|-------------|-------------|
| H | 1.28484000  | -7.09323600 | -0.81366800 |
| C | -0.58082800 | -6.96062700 | 0.29592000  |
| H | -1.02434000 | -7.81954200 | -0.20058300 |
| C | -1.27538200 | -6.28401600 | 1.26165800  |
| H | -2.27622400 | -6.59834500 | 1.54859400  |
| C | 1.31286200  | -5.46212700 | 0.55618900  |
| H | 2.31852500  | -5.16552500 | 0.28157000  |
| N | 0.56195500  | -0.89346300 | -1.79486500 |
| S | -0.93139800 | -1.35457800 | -1.91551400 |
| O | -1.68328600 | -0.54730300 | -2.89407100 |
| O | -1.63098100 | -1.60643300 | -0.61994800 |
| C | -0.86070300 | -3.05706300 | -2.67995400 |
| F | -0.33553700 | -2.99296700 | -3.90752400 |
| F | -2.10723600 | -3.54909200 | -2.76894600 |
| F | -0.12408100 | -3.87567300 | -1.92934300 |
| C | -5.22126900 | -0.24608000 | -0.51503700 |
| C | -4.59550400 | 0.59477300  | -1.67227500 |
| H | -5.26825300 | 0.55906000  | -2.54300700 |
| H | -3.68117500 | 0.10568300  | -2.02076700 |
| C | -4.29309800 | 2.04588400  | -1.47215400 |
| C | -4.45167800 | 0.03472600  | 0.81948200  |
| H | -4.94180100 | 0.82569000  | 1.38067500  |
| H | -4.47932600 | -0.86350300 | 1.44455600  |
| N | -3.05478500 | 0.45222400  | 0.66704300  |
| C | -2.47777200 | 1.46910400  | 1.34633900  |
| N | -1.13151000 | 1.46909500  | 1.40289600  |
| C | -0.28149400 | 2.47203300  | 1.94945400  |
| C | -0.41508500 | 3.82840800  | 1.64507400  |
| C | 0.77541600  | 2.03903800  | 2.75700000  |
| C | 0.48088800  | 4.74815000  | 2.19065400  |
| C | 1.67044500  | 2.96831800  | 3.28213300  |
| H | 0.89264400  | 0.98150900  | 2.95503000  |
| C | 1.52349300  | 4.32948700  | 3.01553100  |
| H | 2.21766300  | 5.04979800  | 3.43228200  |
| C | 2.84724500  | 2.50379200  | 4.09881300  |
| C | 0.29280000  | 6.21602700  | 1.91569000  |
| F | 2.63951900  | 1.28374200  | 4.64729700  |
| F | 3.96952300  | 2.41452800  | 3.35193200  |
| F | 3.11789300  | 3.36004100  | 5.11009400  |
| F | 1.46782600  | 6.88664600  | 1.92596900  |
| F | -0.28662600 | 6.43542100  | 0.71175600  |
| F | -0.49894100 | 6.80257700  | 2.84174000  |
| S | -3.43307100 | 2.73072500  | 2.06207300  |
| H | -1.20119300 | 4.16724800  | 0.98512600  |

|   |              |             |             |
|---|--------------|-------------|-------------|
| H | -0.60513300  | 0.61859800  | 1.12214800  |
| H | -2.42739400  | -0.24756400 | 0.23845000  |
| C | -5.00397300  | 2.88039200  | -0.59653400 |
| H | -5.98917600  | 2.54743700  | -0.27114700 |
| H | -4.35435400  | 2.80851800  | 0.49343200  |
| H | -4.92343200  | 3.95351000  | -0.78142200 |
| C | -5.04945900  | -1.74765700 | -0.97923500 |
| H | -4.00705000  | -1.88775000 | -1.27778500 |
| H | -5.65424900  | -1.86570500 | -1.88589700 |
| C | -6.72946500  | 0.03632300  | -0.32494200 |
| C | -7.33107200  | 0.10348700  | 0.94246900  |
| C | -7.57919300  | 0.15209600  | -1.43981400 |
| C | -8.70500400  | 0.31061800  | 1.08934300  |
| H | -6.73989500  | -0.02324300 | 1.84200500  |
| C | -8.95100900  | 0.35727300  | -1.29928500 |
| H | -7.17854600  | 0.06801000  | -2.44612300 |
| C | -9.52339100  | 0.44506300  | -0.02957400 |
| H | -9.13121100  | 0.35845100  | 2.08777600  |
| H | -9.57185100  | 0.44637500  | -2.18683000 |
| H | -10.59156500 | 0.60745500  | 0.08354300  |
| C | -5.41215100  | -2.84158000 | 0.01569500  |
| C | -6.67918800  | -3.20011000 | 0.25532800  |
| H | -7.52145300  | -2.72188400 | -0.23562400 |
| H | -6.91667600  | -4.00072400 | 0.95215300  |
| C | -3.15875500  | 2.59214700  | -2.27197100 |
| H | -2.91324400  | 3.62318300  | -2.00583400 |
| H | -2.27151500  | 1.95324600  | -2.20158200 |
| H | -3.43016000  | 2.56934800  | -3.33852000 |
| C | -4.25181700  | -3.56824600 | 0.65518200  |
| H | -3.62548800  | -4.04339800 | -0.11099100 |
| H | -3.57849100  | -2.89579200 | 1.20060800  |
| H | -4.59848300  | -4.34247600 | 1.34724700  |

TS-1-1-5S

l imaginary frequency

H = -5315.353570

G = -5315.550237

E(M06-2X-DCM) = -5316.238978

|   |            |            |             |
|---|------------|------------|-------------|
| C | 3.17955000 | 3.28005900 | 0.55756400  |
| C | 2.70515900 | 3.27984200 | 2.05879800  |
| H | 3.54190900 | 2.88900800 | 2.64681900  |
| H | 2.54418600 | 4.32741200 | 2.33736800  |
| C | 1.46074400 | 2.54320100 | 2.47505900  |
| C | 2.02409800 | 3.73233700 | -0.37714900 |

|   |             |             |             |
|---|-------------|-------------|-------------|
| H | 2.39774200  | 3.79144500  | -1.40524700 |
| H | 1.71068500  | 4.74137900  | -0.10356100 |
| N | 0.83998200  | 2.88624900  | -0.35771200 |
| C | -0.40137600 | 3.36766100  | -0.71506500 |
| N | -1.28738200 | 2.34750500  | -0.94498700 |
| C | -2.61662300 | 2.32069600  | -1.38996600 |
| C | -3.51261900 | 3.40066500  | -1.36929000 |
| C | -3.06692900 | 1.07502200  | -1.86374800 |
| C | -4.81635600 | 3.22161500  | -1.83388300 |
| C | -4.37062200 | 0.91986400  | -2.32276900 |
| H | -2.38927900 | 0.22738700  | -1.86737100 |
| C | -5.26120800 | 1.99358600  | -2.32139600 |
| H | -6.27232400 | 1.87699100  | -2.69203500 |
| C | -4.84092400 | -0.44329800 | -2.74734900 |
| C | -5.79742700 | 4.36004600  | -1.72709300 |
| F | -3.85923400 | -1.16271900 | -3.33963500 |
| F | -5.87734100 | -0.38383700 | -3.60725000 |
| F | -5.26173600 | -1.18051100 | -1.68058000 |
| F | -5.19507200 | 5.56377600  | -1.76074600 |
| F | -6.49511500 | 4.30042000  | -0.56156200 |
| F | -6.71111700 | 4.32984600  | -2.72285600 |
| S | -0.74739300 | 5.01541000  | -0.81284500 |
| C | 3.70728000  | 1.85639500  | 0.15150200  |
| H | 3.82686100  | 1.85587200  | -0.93917300 |
| H | 2.92523400  | 1.12084800  | 0.36856200  |
| H | -3.18735400 | 4.36332300  | -1.00331800 |
| C | 1.50474100  | 1.24449900  | 2.99855200  |
| H | -0.87917600 | 1.41139100  | -0.85408700 |
| H | 0.67020200  | 0.97745700  | 3.65042000  |
| H | 0.98823100  | 1.89239400  | -0.53449000 |
| H | 1.32883900  | 0.28198000  | 2.14893400  |
| O | -1.35554200 | -1.39549500 | 0.58027000  |
| O | 0.73238800  | -2.51473600 | -0.51266800 |
| P | 0.22193200  | -1.16912500 | 0.23788800  |
| O | 0.28205000  | 0.06726300  | -0.59910000 |
| C | -2.52827700 | -4.66061100 | 2.93151300  |
| C | -2.17324900 | -4.84289200 | 1.59995300  |
| C | -1.88759400 | -3.74224500 | 0.77757300  |
| C | -2.24140900 | -2.24420000 | 2.67520900  |
| C | -2.60575300 | -3.36550100 | 3.43987300  |
| C | 0.15939700  | -2.82056500 | -1.76271400 |
| C | -1.05186600 | -3.50676800 | -1.78717700 |
| C | -1.69962700 | -3.69732100 | -3.01873800 |
| C | -1.10419200 | -3.28695600 | -4.20607800 |



|   |             |             |             |
|---|-------------|-------------|-------------|
| C | 0.15028400  | -2.68057300 | -4.16192600 |
| C | 0.80573400  | -2.41785900 | -2.94731300 |
| H | -2.93366700 | -3.20499600 | 4.46243300  |
| H | 0.63841600  | -2.37764800 | -5.08357700 |
| C | -1.83029900 | -4.20401200 | -0.67682900 |
| C | -1.35035000 | -5.67967500 | -0.47894400 |
| H | -1.58558200 | -6.31320700 | -1.33998100 |
| H | -0.26266800 | -5.68085700 | -0.34491800 |
| H | -3.83262400 | -3.86620400 | -3.40824100 |
| H | -3.02429800 | -5.40776500 | -3.11940100 |
| C | -1.82280900 | -2.47370400 | 1.34970400  |
| H | -2.76170300 | -5.51114800 | 3.56671600  |
| H | -1.60519700 | -3.43657700 | -5.15889800 |
| C | -2.03730900 | -6.13675500 | 0.82681500  |
| H | -3.01843000 | -6.59004600 | 0.62837900  |
| H | -1.44941700 | -6.88416100 | 1.37133300  |
| C | -3.04757100 | -4.35097600 | -2.81897100 |
| C | -3.26954300 | -4.19518600 | -1.30072400 |
| H | -3.91114400 | -4.97065600 | -0.87203300 |
| H | -3.73983200 | -3.22648000 | -1.10301600 |
| C | 2.15732400  | -1.77255000 | -2.98909900 |
| C | 3.31156800  | -2.55899000 | -2.75317500 |
| C | 2.28677500  | -0.41801600 | -3.38032500 |
| C | 3.24788200  | -3.95092400 | -2.42529100 |
| C | 4.62143000  | -1.96050800 | -2.87654000 |
| C | 3.60423700  | 0.16068600  | -3.52447900 |
| C | 4.38390000  | -4.68590100 | -2.20843700 |
| H | 2.27719500  | -4.42755400 | -2.34936100 |
| C | 5.78131300  | -2.75972400 | -2.63135300 |
| C | 4.73178200  | -0.62086600 | -3.25885700 |
| C | 5.67050100  | -4.08401500 | -2.30430400 |
| H | 4.30471200  | -5.74052800 | -1.95918100 |
| H | 6.75775900  | -2.28918300 | -2.71871700 |
| H | 5.72122600  | -0.18091000 | -3.36868500 |
| H | 6.55953600  | -4.68189100 | -2.12349100 |
| C | -2.37708400 | -0.88122600 | 3.28004000  |
| C | -3.35487400 | 0.01580600  | 2.77805500  |
| C | -1.61162300 | -0.53034400 | 4.42160700  |
| C | -4.21336600 | -0.30099300 | 1.67690100  |
| C | -3.53927600 | 1.30266000  | 3.41313000  |
| C | -1.82939800 | 0.74806200  | 5.06433200  |
| C | -5.14678900 | 0.59073100  | 1.21755100  |
| H | -4.12670500 | -1.27128400 | 1.20235700  |
| C | -4.51066800 | 2.21255500  | 2.88845400  |

|   |             |             |             |
|---|-------------|-------------|-------------|
| C | -2.77726500 | 1.63020000  | 4.53804500  |
| C | -5.29017500 | 1.87445200  | 1.81611200  |
| H | -5.77734000 | 0.31598000  | 0.37869400  |
| H | -4.61582700 | 3.18348000  | 3.36689200  |
| H | -2.93492500 | 2.59184700  | 5.02301300  |
| H | -6.00737200 | 2.58076900  | 1.40911900  |
| C | 1.31823600  | 1.72638900  | -4.05094700 |
| H | 0.44525000  | 2.34185100  | -4.24955300 |
| C | 1.15983800  | 0.42479100  | -3.65134100 |
| H | 0.16420500  | 0.01592400  | -3.52934200 |
| C | 2.61962400  | 2.28575100  | -4.20913900 |
| H | 2.72519300  | 3.31428900  | -4.54393100 |
| C | 3.72693900  | 1.52261600  | -3.94842200 |
| H | 4.72657900  | 1.93350700  | -4.07232500 |
| C | 0.11914300  | -1.01620300 | 6.08013200  |
| H | 0.89171500  | -1.67820000 | 6.45957100  |
| C | -0.11728400 | 0.23193000  | 6.72242900  |
| H | 0.45950700  | 0.50305400  | 7.60262900  |
| C | -1.06203500 | 1.08819100  | 6.22319500  |
| H | -1.25020900 | 2.04769000  | 6.69999000  |
| C | -0.60211600 | -1.38498800 | 4.97369700  |
| H | -0.39157600 | -2.33127000 | 4.49032700  |
| N | 1.16696300  | -1.05978700 | 1.57605900  |
| S | 1.90171100  | -2.25436600 | 2.42419100  |
| C | 3.29514300  | -2.88778200 | 1.30468600  |
| O | 1.04685800  | -3.42009800 | 2.65531600  |
| O | 2.59005800  | -1.60443600 | 3.54357300  |
| F | 2.90818800  | -3.99821000 | 0.68169700  |
| F | 3.64033900  | -1.96290800 | 0.40656500  |
| F | 4.34865300  | -3.16466600 | 2.07653300  |
| C | 4.29808300  | 4.33563400  | 0.37667500  |
| C | 4.76787800  | 4.63075500  | -0.91730700 |
| C | 4.89787700  | 5.01773100  | 1.44512300  |
| C | 5.77200900  | 5.57267900  | -1.13196900 |
| H | 4.36406400  | 4.10599300  | -1.77726300 |
| C | 5.91018500  | 5.95803800  | 1.23459000  |
| H | 4.59687100  | 4.82130100  | 2.46755100  |
| C | 6.34994800  | 6.24605200  | -0.05489600 |
| H | 6.10531200  | 5.77622300  | -2.14617800 |
| H | 6.35182600  | 6.46402900  | 2.08896300  |
| H | 7.13340300  | 6.98044600  | -0.21962700 |
| C | 5.01244400  | 1.38098300  | 0.78136200  |
| H | 2.47291900  | 0.89646700  | 3.35764900  |
| C | 0.18907100  | 3.32177600  | 2.57597500  |

|   |             |            |             |
|---|-------------|------------|-------------|
| H | 0.11486700  | 4.14370200 | 1.86146100  |
| H | -0.69344100 | 2.68008700 | 2.50580900  |
| H | 0.17669900  | 3.76006800 | 3.58788100  |
| C | 6.31399900  | 1.77696900 | 0.11915700  |
| H | 6.29496300  | 1.51589200 | -0.94776600 |
| H | 6.50968200  | 2.85152000 | 0.17708300  |
| H | 7.15747700  | 1.25223000 | 0.57862800  |
| C | 5.02319200  | 0.55742800 | 1.83712700  |
| H | 5.95803300  | 0.19616300 | 2.25898200  |
| H | 4.12065400  | 0.17551900 | 2.30027100  |

TS-1-1-5S-1

l imaginary frequency

H = -5315.353238

G = -5315.550681

E(M06-2X-DCM) = -5316.237983

|   |             |             |             |
|---|-------------|-------------|-------------|
| C | 2.95226200  | 3.43933500  | 0.44610200  |
| C | 2.30517600  | 3.62547600  | 1.87077700  |
| H | 3.09528600  | 3.47477000  | 2.61145400  |
| H | 1.98222900  | 4.66993200  | 1.93225200  |
| C | 1.13855700  | 2.77621300  | 2.29811400  |
| C | 1.87923700  | 3.77230500  | -0.63063600 |
| H | 2.34387200  | 3.72080700  | -1.62262800 |
| H | 1.53003900  | 4.79747600  | -0.49689500 |
| N | 0.71094400  | 2.90488000  | -0.60027400 |
| C | -0.54010300 | 3.32367400  | -0.99611100 |
| N | -1.39026000 | 2.26174800  | -1.16430600 |
| C | -2.72853600 | 2.16295800  | -1.57062200 |
| C | -3.66670300 | 3.20640400  | -1.57066100 |
| C | -3.14172800 | 0.87879000  | -1.96912200 |
| C | -4.97744100 | 2.95226400  | -1.97700600 |
| C | -4.45270300 | 0.64897800  | -2.37259100 |
| H | -2.42942300 | 0.06009800  | -1.95745400 |
| C | -5.38712100 | 1.68471500  | -2.38860100 |
| H | -6.40496600 | 1.50946800  | -2.71508800 |
| C | -4.87887500 | -0.75148300 | -2.71487800 |
| C | -6.00144600 | 4.05351800  | -1.88437500 |
| F | -3.88861700 | -1.45745200 | -3.30897200 |
| F | -5.94676200 | -0.77650400 | -3.53680000 |
| F | -5.22894700 | -1.45261700 | -1.59933200 |
| F | -5.45321200 | 5.27750900  | -2.00364100 |
| F | -6.64591900 | 4.02473200  | -0.68742300 |
| F | -6.95374500 | 3.93502600  | -2.83611100 |
| S | -0.94072400 | 4.94950100  | -1.19875400 |

|   |             |             |             |
|---|-------------|-------------|-------------|
| C | 3.50937200  | 1.98651600  | 0.21574700  |
| H | 3.53585300  | 1.82002800  | -0.86629900 |
| H | 2.78178900  | 1.26318200  | 0.60120700  |
| H | -3.36917500 | 4.19855100  | -1.26440600 |
| C | 1.31235700  | 1.51863500  | 2.89110000  |
| H | -0.95252300 | 1.34649300  | -1.01570200 |
| H | 0.50329500  | 1.20410200  | 3.55461400  |
| H | 0.88837000  | 1.90459400  | -0.69864000 |
| H | 1.21893200  | 0.50847300  | 2.09468500  |
| O | -1.30406800 | -1.43192500 | 0.64179500  |
| O | 0.84029200  | -2.48985400 | -0.40957900 |
| P | 0.25191100  | -1.13290400 | 0.26072300  |
| O | 0.22550200  | 0.04730800  | -0.65579300 |
| C | -2.28184700 | -4.65686300 | 3.13497100  |
| C | -1.93899200 | -4.87180400 | 1.80497700  |
| C | -1.71157700 | -3.79007800 | 0.94089000  |
| C | -2.10676600 | -2.24007700 | 2.78743600  |
| C | -2.40728100 | -3.34884000 | 3.59790300  |
| C | 0.28522800  | -2.88678600 | -1.64326500 |
| C | -0.90298600 | -3.61298800 | -1.63568500 |
| C | -1.54683400 | -3.87592400 | -2.85602000 |
| C | -0.96562600 | -3.49975500 | -4.06159700 |
| C | 0.27419300  | -2.86238100 | -4.04672600 |
| C | 0.92319200  | -2.52867400 | -2.84625400 |
| H | -2.72705500 | -3.16599500 | 4.61920900  |
| H | 0.75616800  | -2.59247100 | -4.98179400 |
| C | -1.65124800 | -4.29730500 | -0.49728000 |
| C | -1.11615200 | -5.74809900 | -0.25701200 |
| H | -1.34106500 | -6.41827400 | -1.09259200 |
| H | -0.02724200 | -5.70675500 | -0.14082900 |
| H | -3.67551900 | -4.12605000 | -3.22601300 |
| H | -2.81741000 | -5.62968500 | -2.88602700 |
| C | -1.69839500 | -2.49903700 | 1.46420300  |
| H | -2.47055200 | -5.49285800 | 3.80344800  |
| H | -1.46373500 | -3.70384100 | -5.00579000 |
| C | -1.76615400 | -6.18526800 | 1.07390200  |
| H | -2.73321000 | -6.67953500 | 0.90658500  |
| H | -1.14368100 | -6.89262600 | 1.63331100  |
| C | -2.87274200 | -4.56389600 | -2.62414800 |
| C | -3.09290900 | -4.35991700 | -1.11103700 |
| H | -3.70535800 | -5.14068000 | -0.65030800 |
| H | -3.59507400 | -3.40099800 | -0.94587700 |
| C | 2.26906300  | -1.87464500 | -2.92003200 |
| C | 3.42804300  | -2.64977000 | -2.66844000 |

|   |             |             |             |
|---|-------------|-------------|-------------|
| C | 2.39003900  | -0.53611500 | -3.36388300 |
| C | 3.37237200  | -4.03041600 | -2.29347500 |
| C | 4.73462600  | -2.05375200 | -2.83079600 |
| C | 3.70415000  | 0.04029700  | -3.54348200 |
| C | 4.51304800  | -4.75559800 | -2.06866100 |
| H | 2.40408900  | -4.50646300 | -2.18829500 |
| C | 5.89976300  | -2.84167700 | -2.57393900 |
| C | 4.83662700  | -0.72909900 | -3.26402400 |
| C | 5.79670400  | -4.15454300 | -2.20146800 |
| H | 4.44001000  | -5.80174100 | -1.78414700 |
| H | 6.87366900  | -2.37218300 | -2.69020400 |
| H | 5.82350200  | -0.29231600 | -3.40385100 |
| H | 6.68958700  | -4.74414800 | -2.01265900 |
| C | -2.30159300 | -0.86609300 | 3.34886300  |
| C | -3.31578300 | -0.02580200 | 2.82046200  |
| C | -1.55677200 | -0.45226200 | 4.48344800  |
| C | -4.15078500 | -0.40406600 | 1.72051300  |
| C | -3.56316600 | 1.26512700  | 3.42571100  |
| C | -1.84224500 | 0.82573100  | 5.10028800  |
| C | -5.11421300 | 0.43782600  | 1.23007700  |
| H | -4.02089700 | -1.38096200 | 1.27031800  |
| C | -4.56605900 | 2.12149700  | 2.87034900  |
| C | -2.82882200 | 1.64949300  | 4.55112200  |
| C | -5.31681800 | 1.72819700  | 1.79627100  |
| H | -5.72422100 | 0.11718600  | 0.39244000  |
| H | -4.71827900 | 3.09690400  | 3.32658800  |
| H | -3.03676700 | 2.61147500  | 5.01613600  |
| H | -6.05734900 | 2.39477500  | 1.36445200  |
| C | 1.40718800  | 1.57565700  | -4.11160800 |
| H | 0.53027500  | 2.17894700  | -4.32954200 |
| C | 1.25723500  | 0.28998300  | -3.66011300 |
| H | 0.26485700  | -0.11864600 | -3.51390200 |
| C | 2.70506400  | 2.13440300  | -4.29889900 |
| H | 2.80406900  | 3.15037600  | -4.67163600 |
| C | 3.81773800  | 1.38609200  | -4.01822400 |
| H | 4.81440800  | 1.79611400  | -4.16663100 |
| C | 0.19354000  | -0.81296800 | 6.15326600  |
| H | 1.00087400  | -1.42415600 | 6.54532800  |
| C | -0.11310800 | 0.43091100  | 6.77349200  |
| H | 0.44493100  | 0.74804900  | 7.65036200  |
| C | -1.09965900 | 1.22662700  | 6.25586100  |
| H | -1.33964000 | 2.18377400  | 6.71366300  |
| C | -0.50306400 | -1.24023200 | 5.05226800  |
| H | -0.23749100 | -2.18093700 | 4.58513200  |

|   |              |              |              |
|---|--------------|--------------|--------------|
| N | 1. 18689000  | -0. 87234700 | 1. 58417300  |
| S | 2. 05866600  | -1. 93347200 | 2. 47447600  |
| C | 3. 53128800  | -2. 40463000 | 1. 38340500  |
| O | 1. 35639500  | -3. 19022800 | 2. 73834100  |
| O | 2. 65228100  | -1. 16732000 | 3. 57482600  |
| F | 3. 28466800  | -3. 54403800 | 0. 74480400  |
| F | 3. 78832300  | -1. 43743000 | 0. 49705300  |
| F | 4. 59512600  | -2. 56656800 | 2. 17378800  |
| C | 4. 07677000  | 4. 48042400  | 0. 24893700  |
| C | 4. 76728900  | 4. 51022700  | -0. 97663400 |
| C | 4. 44730500  | 5. 42318400  | 1. 21780800  |
| C | 5. 77011000  | 5. 44416700  | -1. 22444500 |
| H | 4. 52678600  | 3. 78883300  | -1. 75127000 |
| C | 5. 45726500  | 6. 35873000  | 0. 97496600  |
| H | 3. 95757000  | 5. 44950800  | 2. 18476700  |
| C | 6. 12193900  | 6. 37739300  | -0. 24787000 |
| H | 6. 28064500  | 5. 43888400  | -2. 18388300 |
| H | 5. 71719800  | 7. 07444400  | 1. 75038500  |
| H | 6. 90472800  | 7. 10624100  | -0. 43876400 |
| C | 4. 88712300  | 1. 63742300  | 0. 76011300  |
| H | 2. 30743400  | 1. 28515200  | 3. 26834200  |
| C | -0. 21403200 | 3. 40819100  | 2. 31368200  |
| H | -0. 35367300 | 4. 16153300  | 1. 53551800  |
| H | -1. 01762600 | 2. 66777800  | 2. 27759600  |
| H | -0. 30502500 | 3. 92056500  | 3. 28602700  |
| C | 5. 10860800  | 1. 57066800  | 2. 25268300  |
| H | 4. 96810000  | 2. 54520800  | 2. 73782300  |
| H | 4. 42379900  | 0. 85800600  | 2. 73015900  |
| H | 6. 12869600  | 1. 24513600  | 2. 47823500  |
| C | 5. 87815700  | 1. 32692100  | -0. 08244500 |
| H | 6. 86185800  | 1. 03700800  | 0. 27857500  |
| H | 5. 74175500  | 1. 33815200  | -1. 15987900 |

TS-1-1-5S-2

l imaginary frequency

H = -5315. 341406

G = -5315. 540354

E(M06-2X-DCM) = -5316. 225665

|   |              |             |              |
|---|--------------|-------------|--------------|
| C | -4. 39594200 | 2. 17963400 | 0. 57164700  |
| C | -3. 72784600 | 2. 40079300 | 1. 99659900  |
| H | -4. 35041800 | 1. 85990100 | 2. 71468700  |
| H | -3. 82153500 | 3. 47128000 | 2. 21467000  |
| C | -2. 29751000 | 2. 01627700 | 2. 24128600  |
| C | -3. 62073400 | 2. 94283100 | -0. 52517000 |

|   |             |             |             |
|---|-------------|-------------|-------------|
| H | -4.18502500 | 2.88704400  | -1.46482300 |
| H | -3.53265300 | 3.99913600  | -0.27054000 |
| N | -2.26570000 | 2.45385400  | -0.73089800 |
| C | -1.26417900 | 3.25019300  | -1.25937600 |
| N | -0.12229600 | 2.52668700  | -1.45795200 |
| C | 1.14659300  | 2.86530200  | -1.96163300 |
| C | 1.65369300  | 4.16106500  | -2.10742600 |
| C | 1.97284100  | 1.76937900  | -2.27865700 |
| C | 2.97278400  | 4.33966800  | -2.53803700 |
| C | 3.27738300  | 1.97026800  | -2.71023500 |
| H | 1.58678700  | 0.76318900  | -2.17094200 |
| C | 3.79770700  | 3.26156700  | -2.84209700 |
| H | 4.81969000  | 3.41945700  | -3.16534200 |
| C | 4.13550400  | 0.79168600  | -3.08165500 |
| C | 3.52573800  | 5.73974400  | -2.55430600 |
| F | 3.63824000  | -0.37533400 | -2.60816900 |
| F | 4.24371900  | 0.65180900  | -4.42682100 |
| F | 5.39552900  | 0.91199100  | -2.60522700 |
| F | 4.65696400  | 5.83595100  | -3.28506400 |
| F | 2.64210000  | 6.62970700  | -3.04876400 |
| F | 3.83304200  | 6.15311200  | -1.29591100 |
| S | -1.47587600 | 4.89254600  | -1.55895600 |
| H | 1.03182000  | 5.01374200  | -1.87398400 |
| C | -1.96435000 | 0.76737300  | 2.78673100  |
| H | -0.09940800 | 1.61068400  | -0.99398300 |
| H | -2.77437300 | 0.20111600  | 3.24908100  |
| H | -1.01951300 | 0.73647800  | 3.33458400  |
| H | -2.20210300 | 1.47096200  | -0.97366800 |
| H | -1.63233000 | -0.07865100 | 1.89001200  |
| O | 1.40804100  | -1.57404300 | 1.65779600  |
| O | 0.64804500  | -1.82260000 | -0.83498500 |
| P | 0.34578000  | -1.02783000 | 0.55129000  |
| O | 0.46004500  | 0.42741600  | 0.24982600  |
| C | 5.40190900  | -0.47886700 | 1.00591300  |
| C | 4.85533300  | -1.58789900 | 0.37015200  |
| C | 3.54687300  | -2.00306200 | 0.65979800  |
| C | 3.29433000  | -0.12887400 | 2.20450200  |
| C | 4.63316900  | 0.21210200  | 1.94063500  |
| C | 0.81918500  | -3.20325500 | -1.02586300 |
| C | 1.91578400  | -3.86057200 | -0.46415300 |
| C | 1.94024600  | -5.26488800 | -0.47555800 |
| C | 0.98425400  | -5.98662700 | -1.17944400 |
| C | 0.02334900  | -5.29240200 | -1.90887000 |
| C | -0.09363300 | -3.89161000 | -1.85194400 |

|   |             |             |             |
|---|-------------|-------------|-------------|
| H | 5.06184400  | 1.05512100  | 2.47385300  |
| H | -0.67274800 | -5.83789800 | -2.53762300 |
| C | 3.27460600  | -3.35756800 | 0.02530900  |
| C | 4.28228000  | -3.30899100 | -1.17801600 |
| H | 4.55543000  | -4.30828900 | -1.52873300 |
| H | 3.81163300  | -2.78092500 | -2.01263200 |
| H | 3.87145000  | -6.24725800 | -0.35366200 |
| H | 2.83048200  | -6.56367900 | 1.02920300  |
| C | 2.76188700  | -1.23020400 | 1.50711400  |
| H | 6.41757700  | -0.15792100 | 0.79004500  |
| H | 1.00958800  | -7.07306000 | -1.20183200 |
| C | 5.48557300  | -2.48834100 | -0.66680800 |
| H | 5.96934000  | -1.91456800 | -1.46511700 |
| H | 6.25690500  | -3.13125100 | -0.22056200 |
| C | 3.12290500  | -5.79111500 | 0.30868000  |
| C | 3.67053500  | -4.52035100 | 0.99252000  |
| H | 3.16516700  | -4.36629300 | 1.95305500  |
| H | 4.74822100  | -4.55567300 | 1.18069800  |
| C | -1.08974000 | -3.24506200 | -2.76493300 |
| C | -2.45220600 | -3.64617000 | -2.72070600 |
| C | -0.63885200 | -2.38488200 | -3.80433800 |
| C | -2.99014100 | -4.45635600 | -1.66768700 |
| C | -3.35716200 | -3.23169100 | -3.76952600 |
| C | -1.57300400 | -1.93763300 | -4.81493300 |
| C | -4.30211400 | -4.85458200 | -1.67432300 |
| H | -2.35295400 | -4.72599400 | -0.83557400 |
| C | -4.71432000 | -3.68262700 | -3.74540300 |
| C | -2.89404300 | -2.39099300 | -4.78400300 |
| C | -5.17630400 | -4.47770200 | -2.73227000 |
| H | -4.68304200 | -5.45584000 | -0.85338000 |
| H | -5.37302200 | -3.37122700 | -4.55308500 |
| H | -3.57901200 | -2.07991900 | -5.57075000 |
| H | -6.21053200 | -4.81145500 | -2.72317100 |
| C | 2.55118600  | 0.65593400  | 3.23832000  |
| C | 2.36065100  | 2.05057100  | 3.06079900  |
| C | 2.16381400  | 0.03443000  | 4.45378300  |
| C | 2.70324100  | 2.73699000  | 1.84884200  |
| C | 1.79923400  | 2.83770200  | 4.13666900  |
| C | 1.55196300  | 0.82665700  | 5.49792700  |
| C | 2.55897300  | 4.09602300  | 1.72922100  |
| H | 3.07313000  | 2.16085000  | 1.00932300  |
| C | 1.66849300  | 4.25358700  | 3.97313400  |
| C | 1.39606200  | 2.20378600  | 5.31519200  |
| C | 2.04620600  | 4.86920500  | 2.81010800  |



|   |             |             |             |
|---|-------------|-------------|-------------|
| H | 2.83617800  | 4.59222400  | 0.80352900  |
| H | 1.26562200  | 4.83145300  | 4.80213500  |
| H | 0.96728800  | 2.79969500  | 6.11881100  |
| H | 1.94809100  | 5.94569000  | 2.70077000  |
| C | 1.11500200  | -1.11726800 | -4.95481500 |
| H | 2.15196100  | -0.80194100 | -5.01902600 |
| C | 0.72137000  | -1.95534500 | -3.94314700 |
| H | 1.46122200  | -2.30306900 | -3.23378600 |
| C | 0.17938700  | -0.65350800 | -5.92176900 |
| H | 0.50768500  | 0.01371600  | -6.71391000 |
| C | -1.12382300 | -1.06289400 | -5.85389100 |
| H | -1.84914500 | -0.73300200 | -6.59406900 |
| C | 1.99764800  | -1.92202200 | 5.91125000  |
| H | 2.17845200  | -2.97906500 | 6.08608300  |
| C | 1.36096800  | -1.14421000 | 6.91907700  |
| H | 1.05535400  | -1.61375700 | 7.85003100  |
| C | 1.15078800  | 0.19238700  | 6.71567400  |
| H | 0.68308200  | 0.80428700  | 7.48350600  |
| C | 2.38631300  | -1.35361200 | 4.72660500  |
| H | 2.87743500  | -1.96388800 | 3.97831200  |
| N | -1.12760100 | -1.32714300 | 1.23115600  |
| S | -1.78411300 | -2.68371700 | 1.85210200  |
| C | -1.00385900 | -2.91348300 | 3.54935500  |
| O | -3.18495900 | -2.37747900 | 2.14746300  |
| O | -1.40354200 | -3.89262200 | 1.11935400  |
| F | -1.77521100 | -3.74381500 | 4.25615300  |
| F | -0.92989400 | -1.73956600 | 4.19354300  |
| F | 0.21708000  | -3.43803900 | 3.44768300  |
| C | -1.23486500 | 3.04656200  | 2.07399000  |
| H | -0.30407200 | 2.60217100  | 1.70955800  |
| H | -1.53054800 | 3.87897300  | 1.43432100  |
| H | -1.01014600 | 3.45022200  | 3.07350600  |
| C | -5.81708200 | 2.77603000  | 0.72039600  |
| C | -6.74691200 | 2.16296600  | 1.57842600  |
| C | -6.22014000 | 3.95312500  | 0.06973400  |
| C | -8.02279100 | 2.68989500  | 1.76936100  |
| H | -6.48129600 | 1.25409000  | 2.11080500  |
| C | -7.50025700 | 4.48213800  | 0.25607100  |
| H | -5.54901300 | 4.47615700  | -0.60143500 |
| C | -8.40895800 | 3.85487300  | 1.10510400  |
| H | -8.71536200 | 2.18574000  | 2.43807600  |
| H | -7.78014900 | 5.39151100  | -0.26887000 |
| H | -9.40368300 | 4.26714200  | 1.24948200  |
| C | -4.44386800 | 0.64795400  | 0.25699900  |

|   |             |             |             |
|---|-------------|-------------|-------------|
| H | -3.45422200 | 0.21743100  | 0.43496700  |
| H | -5.10217000 | 0.15620800  | 0.98292900  |
| C | -4.87307700 | 0.27470000  | -1.15067900 |
| C | -3.99800500 | -0.29306000 | -1.98831300 |
| H | -2.98021200 | -0.53734600 | -1.69099000 |
| H | -4.27780000 | -0.58829900 | -2.99382700 |
| C | -6.30702900 | 0.50718800  | -1.56498700 |
| H | -6.99866500 | 0.03472000  | -0.85528300 |
| H | -6.56999400 | 1.57062000  | -1.58834000 |
| H | -6.49723300 | 0.08677200  | -2.55708800 |

TS-1-1-5R

l imaginary frequency

H = -5315.354732

G = -5315.551664

E(M06-2X-DCM) = -5316.238394

|   |             |             |             |
|---|-------------|-------------|-------------|
| C | 2.05048000  | 4.36338800  | 0.85587000  |
| C | 1.04091600  | 4.14699700  | 2.04109200  |
| H | 1.53926100  | 4.50152900  | 2.95506800  |
| H | 0.19077200  | 4.81151100  | 1.85991300  |
| C | 0.50648600  | 2.77879600  | 2.38970300  |
| C | 1.28383400  | 4.18476300  | -0.48425000 |
| H | 1.99024400  | 4.07548500  | -1.31296900 |
| H | 0.71976600  | 5.09771500  | -0.67341500 |
| N | 0.31283800  | 3.10063800  | -0.52755200 |
| C | -1.00655500 | 3.28791600  | -0.87234600 |
| N | -1.62804500 | 2.09767800  | -1.14459400 |
| C | -2.93038000 | 1.75935800  | -1.54062900 |
| C | -4.05069500 | 2.60409300  | -1.51023200 |
| C | -3.09454900 | 0.43269300  | -1.98093300 |
| C | -5.29065500 | 2.11820700  | -1.92785700 |
| C | -4.33832600 | -0.02767800 | -2.39882200 |
| H | -2.24058800 | -0.23675600 | -1.99223000 |
| C | -5.45289500 | 0.81131900  | -2.38426400 |
| H | -6.41905200 | 0.45761800  | -2.72316400 |
| C | -4.49376100 | -1.46905000 | -2.79684800 |
| C | -6.50521900 | 3.00195800  | -1.80780400 |
| F | -3.37819000 | -1.96307100 | -3.38163400 |
| F | -5.51904000 | -1.65621500 | -3.65182300 |
| F | -4.74007700 | -2.26279400 | -1.71562100 |
| F | -6.19778400 | 4.31131600  | -1.87382000 |
| F | -7.14122800 | 2.80478800  | -0.62310700 |
| F | -7.41075700 | 2.74345400  | -2.77778100 |
| S | -1.74444300 | 4.80797300  | -0.89697600 |

|   |             |             |             |
|---|-------------|-------------|-------------|
| H | -3.94643400 | 3.62527000  | -1.17461300 |
| C | 1.29263300  | 1.71723600  | 2.84904600  |
| H | -1.01689800 | 1.27867100  | -1.06113000 |
| H | 0.79244600  | 1.08713400  | 3.59270100  |
| H | 0.67291800  | 2.15280800  | -0.63821700 |
| H | 1.34907900  | 0.68817200  | 2.03626400  |
| O | -0.93201100 | -1.57037300 | 0.56174200  |
| O | 1.35192800  | -2.22291200 | -0.52843500 |
| P | 0.55780700  | -1.00814400 | 0.19907000  |
| O | 0.34188300  | 0.19285700  | -0.66286200 |
| C | -1.35479200 | -4.98677400 | 2.95756600  |
| C | -0.96027500 | -5.10125700 | 1.63006300  |
| C | -0.92852000 | -3.97636300 | 0.79152400  |
| C | -1.63678400 | -2.57305900 | 2.66093600  |
| C | -1.73586300 | -3.73811800 | 3.44172600  |
| C | 0.86752500  | -2.67405800 | -1.77101200 |
| C | -0.16287300 | -3.60948000 | -1.78099700 |
| C | -0.74592900 | -3.96759700 | -3.00727300 |
| C | -0.24776800 | -3.46530300 | -4.20405500 |
| C | 0.84404800  | -2.59909200 | -4.17341300 |
| C | 1.41846700  | -2.17072700 | -2.96485900 |
| H | -2.10342300 | -3.64283200 | 4.45883900  |
| H | 1.26073900  | -2.21938500 | -5.10168600 |
| C | -0.76662700 | -4.43945600 | -0.65531300 |
| C | 0.03544500  | -5.76402600 | -0.43450500 |
| H | -0.04798600 | -6.44817800 | -1.28481600 |
| H | 1.09463100  | -5.51524900 | -0.30263800 |
| H | -2.78751200 | -4.61369000 | -3.38802300 |
| H | -1.65772700 | -5.93092300 | -3.07046500 |
| C | -1.15690400 | -2.71611500 | 1.34351800  |
| H | -1.38952100 | -5.85842800 | 3.60589500  |
| H | -0.69741000 | -3.74404600 | -5.15346700 |
| C | -0.53175300 | -6.34309100 | 0.87939700  |
| H | -1.38352500 | -7.01123300 | 0.69087900  |
| H | 0.20956600  | -6.92736900 | 1.43604900  |
| C | -1.91562400 | -4.89995900 | -2.79093000 |
| C | -2.16980500 | -4.76713200 | -1.27533900 |
| H | -2.62200300 | -5.65784200 | -0.82936700 |
| H | -2.84563800 | -3.92472000 | -1.09626500 |
| C | 2.59660300  | -1.24784900 | -3.02199100 |
| C | 3.89354700  | -1.75651300 | -2.76718000 |
| C | 2.42627400  | 0.09369500  | -3.44090500 |
| C | 4.13350300  | -3.11676000 | -2.39102900 |
| C | 5.04197100  | -0.89155400 | -2.91802500 |

|   |             |             |             |
|---|-------------|-------------|-------------|
| C | 3.58399500  | 0.94673200  | -3.59270400 |
| C | 5.40194000  | -3.58022600 | -2.15853300 |
| H | 3.28923100  | -3.78915000 | -2.29015600 |
| C | 6.34870900  | -1.41364000 | -2.66166500 |
| C | 4.85639300  | 0.43294000  | -3.32590700 |
| C | 6.52773200  | -2.71857400 | -2.28972000 |
| H | 5.55335400  | -4.61715900 | -1.87147200 |
| H | 7.20049300  | -0.74727200 | -2.77670500 |
| H | 5.72498000  | 1.07708800  | -3.44877700 |
| H | 7.52574600  | -3.10394300 | -2.09988400 |
| C | -2.12530400 | -1.28969300 | 3.26188700  |
| C | -3.30752400 | -0.68264600 | 2.76202100  |
| C | -1.50338800 | -0.77344300 | 4.42838800  |
| C | -4.01193900 | -1.16957800 | 1.61455600  |
| C | -3.86888500 | 0.46204400  | 3.44743900  |
| C | -2.09469600 | 0.35180500  | 5.11973200  |
| C | -5.14490700 | -0.55102100 | 1.15476900  |
| H | -3.64038400 | -2.04737300 | 1.09971900  |
| C | -5.04503400 | 1.08673600  | 2.92484200  |
| C | -3.25940500 | 0.93457400  | 4.61300400  |
| C | -5.66345900 | 0.60488400  | 1.80365900  |
| H | -5.64700000 | -0.94521900 | 0.27793000  |
| H | -5.43496400 | 1.96036900  | 3.44194500  |
| H | -3.70228600 | 1.77969600  | 5.13696300  |
| H | -6.53803000 | 1.10340400  | 1.39663800  |
| C | 1.01085300  | 1.96342000  | -4.13508300 |
| H | 0.02432900  | 2.36876700  | -4.34202300 |
| C | 1.14212600  | 0.66170700  | -3.72671600 |
| H | 0.26165400  | 0.04230300  | -3.60622900 |
| C | 2.15598100  | 2.79839900  | -4.28562200 |
| H | 2.03204300  | 3.82686100  | -4.61329900 |
| C | 3.40364600  | 2.30099100  | -4.01923300 |
| H | 4.28620800  | 2.92637900  | -4.13157600 |
| C | 0.29141300  | -0.79121300 | 6.08992500  |
| H | 1.22577900  | -1.20885200 | 6.45295200  |
| C | -0.30901800 | 0.30021200  | 6.77938700  |
| H | 0.15954200  | 0.69382800  | 7.67739600  |
| C | -1.46760600 | 0.85339300  | 6.30378900  |
| H | -1.93511100 | 1.69098100  | 6.81684700  |
| C | -0.28741300 | -1.31385500 | 4.96135600  |
| H | 0.19121000  | -2.13916100 | 4.44822100  |
| N | 1.46293000  | -0.66143000 | 1.52336700  |
| S | 2.39928200  | -1.65596100 | 2.42960600  |
| C | 3.89991400  | -2.07404700 | 1.35149600  |

|   |              |              |              |
|---|--------------|--------------|--------------|
| O | 1. 77666600  | -2. 95476700 | 2. 69739100  |
| O | 2. 92751300  | -0. 84500900 | 3. 52753400  |
| F | 3. 72648800  | -3. 25746100 | 0. 76637600  |
| F | 4. 09333700  | -1. 13975800 | 0. 41795400  |
| F | 4. 97385900  | -2. 13248700 | 2. 14279600  |
| H | 2. 34392500  | 1. 90032800  | 3. 05469200  |
| C | -0. 98046200 | 2. 64906500  | 2. 45430100  |
| H | -1. 48776400 | 3. 25207400  | 1. 69769100  |
| H | -1. 30811500 | 1. 60849100  | 2. 40115000  |
| H | -1. 30325000 | 3. 03109900  | 3. 43530300  |
| C | 3. 29875400  | 3. 48153900  | 1. 01821600  |
| C | 3. 68928400  | 2. 52711700  | 0. 07096100  |
| C | 4. 11543400  | 3. 63875400  | 2. 15406900  |
| C | 4. 85561900  | 1. 77397600  | 0. 23963900  |
| H | 3. 09865500  | 2. 35542800  | -0. 82244300 |
| C | 5. 27191700  | 2. 88363700  | 2. 33204500  |
| H | 3. 84775100  | 4. 36165400  | 2. 92062600  |
| C | 5. 65159700  | 1. 94685300  | 1. 36859500  |
| H | 5. 12659800  | 1. 04398200  | -0. 51533400 |
| H | 5. 87613500  | 3. 02773100  | 3. 22379000  |
| H | 6. 55228400  | 1. 35458700  | 1. 50280700  |
| C | 2. 44829700  | 5. 88796100  | 0. 93177300  |
| H | 3. 02354500  | 6. 04957600  | 1. 85204300  |
| H | 1. 51650900  | 6. 45477800  | 1. 04116000  |
| C | 3. 22203100  | 6. 47060300  | -0. 23893500 |
| C | 2. 62276500  | 7. 31085000  | -1. 09166400 |
| H | 1. 57340300  | 7. 57888700  | -0. 99639000 |
| H | 3. 16406700  | 7. 76395100  | -1. 91881400 |
| C | 4. 68901300  | 6. 13468100  | -0. 37271600 |
| H | 4. 85076600  | 5. 07013100  | -0. 57414000 |
| H | 5. 14985700  | 6. 70998500  | -1. 18184100 |
| H | 5. 22993200  | 6. 35790800  | 0. 55650400  |

TS-1-1-5R-1

l imaginary frequency

H = -5315. 352866

G = -5315. 550096

E(M06-2X-DCM) = -5316. 237056

|   |             |             |              |
|---|-------------|-------------|--------------|
| C | 2. 00494700 | 4. 36274400 | 0. 94849200  |
| C | 1. 00933900 | 4. 13980700 | 2. 14444500  |
| H | 1. 52943500 | 4. 45441300 | 3. 05996100  |
| H | 0. 17430800 | 4. 83137900 | 1. 99560200  |
| C | 0. 44465500 | 2. 77395300 | 2. 45223400  |
| C | 1. 21168700 | 4. 23618800 | -0. 37853500 |

|   |             |             |             |
|---|-------------|-------------|-------------|
| H | 1.90460800  | 4.20211600  | -1.22626000 |
| H | 0.60611900  | 5.13520200  | -0.49201000 |
| N | 0.27217400  | 3.12786500  | -0.46495500 |
| C | -1.04352400 | 3.29340100  | -0.83830000 |
| N | -1.64150400 | 2.09476200  | -1.12064500 |
| C | -2.93364900 | 1.73777300  | -1.53456800 |
| C | -4.06853100 | 2.56289900  | -1.50766600 |
| C | -3.07119200 | 0.41171300  | -1.98555000 |
| C | -5.29636100 | 2.05928300  | -1.93979600 |
| C | -4.30347200 | -0.06671500 | -2.41727100 |
| H | -2.20605100 | -0.24318700 | -1.99306000 |
| C | -5.43218600 | 0.75316300  | -2.40678400 |
| H | -6.38924500 | 0.38538900  | -2.75637300 |
| C | -4.43176700 | -1.50795700 | -2.82540800 |
| C | -6.52687500 | 2.92115100  | -1.82327500 |
| F | -3.30332700 | -1.98032900 | -3.40279900 |
| F | -5.44622000 | -1.70624700 | -3.69084100 |
| F | -4.67535700 | -2.31186800 | -1.75109500 |
| F | -6.24144400 | 4.23605300  | -1.87753200 |
| F | -7.16864500 | 2.70459100  | -0.64507900 |
| F | -7.42012400 | 2.65416800  | -2.80223500 |
| S | -1.80396800 | 4.80235400  | -0.88498400 |
| H | -3.98523500 | 3.58294900  | -1.16308500 |
| C | 1.20861100  | 1.69459800  | 2.90872800  |
| H | -1.01890900 | 1.28459200  | -1.03027100 |
| H | 0.68063900  | 1.04873600  | 3.61850500  |
| H | 0.65702100  | 2.19042700  | -0.58241300 |
| H | 1.30755900  | 0.69154200  | 2.07224600  |
| O | -0.91017800 | -1.58424300 | 0.55458100  |
| O | 1.38572700  | -2.18906100 | -0.53696900 |
| P | 0.57201300  | -0.99450400 | 0.20237000  |
| O | 0.33977800  | 0.21263400  | -0.64676700 |
| C | -1.27764800 | -5.01943700 | 2.93301100  |
| C | -0.87733800 | -5.12012500 | 1.60615100  |
| C | -0.86456100 | -3.99072300 | 0.77327600  |
| C | -1.60216100 | -2.60966300 | 2.64733500  |
| C | -1.68273600 | -3.78029500 | 3.42201900  |
| C | 0.90741200  | -2.64083900 | -1.78182400 |
| C | -0.10482300 | -3.59620400 | -1.79649700 |
| C | -0.68169500 | -3.95907200 | -3.02428900 |
| C | -0.19518500 | -3.44038200 | -4.21873500 |
| C | 0.87910900  | -2.55308100 | -4.18399200 |
| C | 1.44679000  | -2.12049300 | -2.97360800 |
| H | -2.05478500 | -3.69675100 | 4.43852100  |

|   |              |              |              |
|---|--------------|--------------|--------------|
| H | 1. 28731600  | -2. 15983300 | -5. 11037300 |
| C | -0. 69228400 | -4. 44368000 | -0. 67523800 |
| C | 0. 13475000  | -5. 75361700 | -0. 45980500 |
| H | 0. 06572000  | -6. 43512600 | -1. 31352900 |
| H | 1. 18874000  | -5. 48514100 | -0. 32498400 |
| H | -2. 70993700 | -4. 64335600 | -3. 40869300 |
| H | -1. 55447200 | -5. 93968200 | -3. 09756100 |
| C | -1. 11679200 | -2. 73742700 | 1. 33036500  |
| H | -1. 29824000 | -5. 89468400 | 3. 57708500  |
| H | -0. 64037500 | -3. 72256600 | -5. 16922100 |
| C | -0. 42334500 | -6. 34980900 | 0. 85041600  |
| H | -1. 26144600 | -7. 03372900 | 0. 65728900  |
| H | 0. 32836900  | -6. 92192300 | 1. 40575900  |
| C | -1. 83261800 | -4. 91541600 | -2. 81284200 |
| C | -2. 08908300 | -4. 79512200 | -1. 29681100 |
| H | -2. 52434700 | -5. 69632700 | -0. 85510200 |
| H | -2. 78050200 | -3. 96632300 | -1. 11366300 |
| C | 2. 60784100  | -1. 17627000 | -3. 03262900 |
| C | 3. 91548100  | -1. 66345500 | -2. 79099700 |
| C | 2. 41090200  | 0. 16250900  | -3. 44864600 |
| C | 4. 18133200  | -3. 01817100 | -2. 41215500 |
| C | 5. 04821700  | -0. 78125500 | -2. 95952700 |
| C | 3. 55284600  | 1. 03357100  | -3. 61591800 |
| C | 5. 45964800  | -3. 46063500 | -2. 19328600 |
| H | 3. 34906200  | -3. 70315900 | -2. 29746600 |
| C | 6. 36613600  | -1. 28204800 | -2. 71840100 |
| C | 4. 83673600  | 0. 53913600  | -3. 36827800 |
| C | 6. 57016200  | -2. 58232100 | -2. 34307300 |
| H | 5. 63077800  | -4. 49362000 | -1. 90307300 |
| H | 7. 20586300  | -0. 60294800 | -2. 84680500 |
| H | 5. 69350900  | 1. 19628100  | -3. 50454000 |
| H | 7. 57639300  | -2. 95126700 | -2. 16428700 |
| C | -2. 11306100 | -1. 33796200 | 3. 25378500  |
| C | -3. 30025400 | -0. 74350100 | 2. 75047300  |
| C | -1. 50577500 | -0. 82162700 | 4. 42794700  |
| C | -3. 99038600 | -1. 23160500 | 1. 59482000  |
| C | -3. 88188200 | 0. 38827900  | 3. 44044600  |
| C | -2. 11727400 | 0. 29012200  | 5. 12367900  |
| C | -5. 12828600 | -0. 62488400 | 1. 13147600  |
| H | -3. 60372200 | -2. 10064400 | 1. 07636000  |
| C | -5. 06285200 | 1. 00083100  | 2. 91425300  |
| C | -3. 28674600 | 0. 86040700  | 4. 61358600  |
| C | -5. 66681900 | 0. 51915500  | 1. 78511400  |
| H | -5. 61894900 | -1. 01939700 | 0. 24830200  |

|   |             |             |             |
|---|-------------|-------------|-------------|
| H | -5.46829800 | 1.86511500  | 3.43512800  |
| H | -3.74497800 | 1.69509800  | 5.14106900  |
| H | -6.54519600 | 1.00885400  | 1.37555200  |
| C | 0.95680900  | 2.01011700  | -4.12162400 |
| H | -0.03875900 | 2.39988700  | -4.31480600 |
| C | 1.11424100  | 0.71012000  | -3.71703900 |
| H | 0.24544200  | 0.07655200  | -3.58602600 |
| C | 2.08649500  | 2.86316900  | -4.28635000 |
| H | 1.94197000  | 3.88975700  | -4.61167300 |
| C | 3.34547600  | 2.38527300  | -4.03819500 |
| H | 4.21636000  | 3.02483400  | -4.16091000 |
| C | 0.27810600  | -0.82696700 | 6.10146800  |
| H | 1.21597200  | -1.23401900 | 6.46750100  |
| C | -0.34255800 | 0.25011800  | 6.79547000  |
| H | 0.11412100  | 0.64300200  | 7.69989400  |
| C | -1.50533800 | 0.79101200  | 6.31598200  |
| H | -1.98802400 | 1.61790400  | 6.83232500  |
| C | -0.28538000 | -1.34861300 | 4.96471200  |
| H | 0.20913800  | -2.16231300 | 4.44804000  |
| N | 1.46598600  | -0.64809700 | 1.53353500  |
| S | 2.42030400  | -1.63478000 | 2.42935600  |
| C | 3.92482100  | -2.02075000 | 1.34334000  |
| O | 1.81890300  | -2.94544600 | 2.68850300  |
| O | 2.93734300  | -0.82470600 | 3.53331400  |
| F | 3.77138300  | -3.20644100 | 0.75642500  |
| F | 4.09701900  | -1.08188600 | 0.41124300  |
| F | 5.00272900  | -2.06081300 | 2.13065700  |
| H | 2.25339900  | 1.86737800  | 3.15361200  |
| C | -1.04476100 | 2.66203200  | 2.47900000  |
| H | -1.52856000 | 3.29887000  | 1.73490600  |
| H | -1.38449200 | 1.62849900  | 2.38079700  |
| H | -1.38276900 | 3.01030100  | 3.46753500  |
| C | 3.24014800  | 3.45629600  | 1.06341000  |
| C | 3.64820400  | 2.58801100  | 0.04543000  |
| C | 4.03975300  | 3.51941600  | 2.22056300  |
| C | 4.80787400  | 1.81704000  | 0.17301200  |
| H | 3.07676600  | 2.49806000  | -0.87200500 |
| C | 5.19141600  | 2.74853700  | 2.35611700  |
| H | 3.76405200  | 4.18263900  | 3.03697800  |
| C | 5.58318200  | 1.89037600  | 1.32623200  |
| H | 5.09014200  | 1.15078600  | -0.63494400 |
| H | 5.78074400  | 2.81724900  | 3.26657200  |
| H | 6.47774500  | 1.28250700  | 1.42769200  |
| C | 2.46128000  | 5.86919900  | 1.05728600  |



|   |            |            |             |
|---|------------|------------|-------------|
| H | 3.03846300 | 5.97973400 | 1.98051900  |
| H | 1.55581500 | 6.47709300 | 1.18191200  |
| C | 3.27408900 | 6.42731100 | -0.10614900 |
| C | 4.59058400 | 6.21270100 | -0.21061800 |
| H | 5.14094200 | 5.62076600 | 0.51443800  |
| H | 5.16526700 | 6.62585000 | -1.03622600 |
| C | 2.53999700 | 7.29384300 | -1.10411700 |
| H | 2.08690700 | 8.16180500 | -0.60541600 |
| H | 3.21551200 | 7.66624100 | -1.88053000 |
| H | 1.71896300 | 6.75959100 | -1.59752800 |

TS-1-1-5R-2

l imaginary frequency

H = -5315.349490

G = -5315.547237

E(M06-2X-DCM) = -5316.231959

|   |             |             |             |
|---|-------------|-------------|-------------|
| C | 2.22610500  | 4.28735600  | -0.62052000 |
| C | 1.29967500  | 4.52438100  | 0.61915000  |
| H | 1.88774500  | 5.04426900  | 1.38412500  |
| H | 0.50878300  | 5.21114300  | 0.30096400  |
| C | 0.65963200  | 3.36364300  | 1.34569500  |
| C | 1.33367000  | 3.77650700  | -1.79230100 |
| H | 1.96376800  | 3.41589600  | -2.61269600 |
| H | 0.77110800  | 4.62690900  | -2.17843100 |
| N | 0.33808400  | 2.76970500  | -1.46178400 |
| C | -0.99108000 | 2.89635300  | -1.81091700 |
| N | -1.65937000 | 1.70969600  | -1.68275100 |
| C | -2.99038700 | 1.32479100  | -1.90360500 |
| C | -4.08558300 | 2.18739600  | -2.06296800 |
| C | -3.21226500 | -0.06465200 | -1.93041400 |
| C | -5.35993200 | 1.65239200  | -2.25776000 |
| C | -4.48991300 | -0.57532300 | -2.13138800 |
| H | -2.37669000 | -0.74234100 | -1.78940700 |
| C | -5.58077500 | 0.27694900  | -2.30484200 |
| H | -6.57408900 | -0.11998200 | -2.47586500 |
| C | -4.70398900 | -2.06274500 | -2.08173900 |
| C | -6.54355000 | 2.58139900  | -2.33822800 |
| F | -3.63864200 | -2.75070600 | -2.55272100 |
| F | -5.78400700 | -2.44794400 | -2.79066900 |
| F | -4.90295800 | -2.49671700 | -0.80440000 |
| F | -6.20859800 | 3.80357000  | -2.79380100 |
| F | -7.11378700 | 2.75756000  | -1.11729700 |
| F | -7.51019700 | 2.09241700  | -3.14689800 |
| S | -1.68164200 | 4.36296200  | -2.28741500 |

|   |             |             |             |
|---|-------------|-------------|-------------|
| H | -3.93700900 | 3.25690200  | -2.04400700 |
| C | 1.37327400  | 2.40526400  | 2.07385400  |
| H | -1.06707500 | 0.92513700  | -1.38864300 |
| H | 0.84298000  | 2.04142000  | 2.95999600  |
| H | 0.67035500  | 1.81648300  | -1.31114900 |
| H | 1.39568000  | 1.18955700  | 1.57557600  |
| O | -0.95191600 | -1.33608700 | 0.96324300  |
| O | 1.24935700  | -2.36193200 | -0.00416700 |
| P | 0.51876200  | -0.95850500 | 0.36150700  |
| O | 0.26273600  | -0.07517800 | -0.81620500 |
| C | -1.26325000 | -3.86731400 | 4.29335300  |
| C | -0.96456200 | -4.38543300 | 3.03889200  |
| C | -0.96929800 | -3.56114400 | 1.90338000  |
| C | -1.52008100 | -1.64070100 | 3.30772400  |
| C | -1.58530000 | -2.51734900 | 4.40527100  |
| C | 0.67763800  | -3.14335100 | -1.02757700 |
| C | -0.37153800 | -3.99802900 | -0.70110200 |
| C | -1.04400100 | -4.67643400 | -1.73040500 |
| C | -0.61656900 | -4.56943100 | -3.04883600 |
| C | 0.49483500  | -3.77965300 | -3.33841300 |
| C | 1.15908000  | -3.03846200 | -2.34649100 |
| H | -1.87865900 | -2.11067800 | 5.36819100  |
| H | 0.85749400  | -3.70838000 | -4.35961700 |
| C | -0.91680500 | -4.43543600 | 0.65240100  |
| C | -0.13186800 | -5.66921200 | 1.20789400  |
| H | -0.29147600 | -6.56947900 | 0.60617000  |
| H | 0.93949900  | -5.43890900 | 1.19453300  |
| H | -3.12112100 | -5.31901000 | -1.78480600 |
| H | -2.00371700 | -6.53148800 | -1.15723500 |
| C | -1.13735900 | -2.18644500 | 2.06616900  |
| H | -1.27007400 | -4.50567400 | 5.17300000  |
| H | -1.13554100 | -5.09566900 | -3.84570400 |
| C | -0.61682200 | -5.81013100 | 2.66679300  |
| H | -1.49424800 | -6.46780000 | 2.73818400  |
| H | 0.14923200  | -6.23464800 | 3.32539800  |
| C | -2.21785900 | -5.45391500 | -1.18091100 |
| C | -2.36594600 | -4.87107500 | 0.23946600  |
| H | -2.80770400 | -5.57126400 | 0.95459200  |
| H | -3.00795700 | -3.98509300 | 0.19963300  |
| C | 2.35483100  | -2.23052700 | -2.74777900 |
| C | 3.65208300  | -2.70599000 | -2.43643200 |
| C | 2.19222000  | -1.06943500 | -3.54127100 |
| C | 3.88033000  | -3.89872900 | -1.67830200 |
| C | 4.81029900  | -1.99005700 | -2.92181100 |

|   |              |              |              |
|---|--------------|--------------|--------------|
| C | 3. 35925100  | -0. 36525500 | -4. 02385300 |
| C | 5. 14878000  | -4. 33648000 | -1. 40057300 |
| H | 3. 02712600  | -4. 46261200 | -1. 31890600 |
| C | 6. 11697600  | -2. 47913200 | -2. 60726900 |
| C | 4. 63278100  | -0. 84375600 | -3. 70250100 |
| C | 6. 28588300  | -3. 61704500 | -1. 86578300 |
| H | 5. 29142700  | -5. 24337400 | -0. 81940900 |
| H | 6. 97648000  | -1. 92540700 | -2. 97802400 |
| H | 5. 50790800  | -0. 31634200 | -4. 07751100 |
| H | 7. 28383200  | -3. 97923600 | -1. 63450300 |
| C | -1. 94028800 | -0. 21902300 | 3. 52637300  |
| C | -3. 13758000 | 0. 26188900  | 2. 93394800  |
| C | -1. 23232100 | 0. 59218900  | 4. 45085900  |
| C | -3. 92630000 | -0. 51253500 | 2. 02374800  |
| C | -3. 62642900 | 1. 58038100  | 3. 27730200  |
| C | -1. 75079700 | 1. 89550000  | 4. 80674400  |
| C | -5. 07131900 | -0. 01062800 | 1. 46280500  |
| H | -3. 61038800 | -1. 51835900 | 1. 77447800  |
| C | -4. 81879000 | 2. 07128200  | 2. 65746300  |
| C | -2. 93168500 | 2. 35052700  | 4. 21403300  |
| C | -5. 51941800 | 1. 30606600  | 1. 76567000  |
| H | -5. 63786400 | -0. 62505600 | 0. 77151400  |
| H | -5. 15390800 | 3. 07408800  | 2. 91198600  |
| H | -3. 31943800 | 3. 33062500  | 4. 48600500  |
| H | -6. 40636100 | 1. 69821300  | 1. 27712000  |
| C | 0. 78256800  | 0. 57780000  | -4. 67300700 |
| H | -0. 20476100 | 0. 95395300  | -4. 92616800 |
| C | 0. 90706600  | -0. 54650700 | -3. 89911300 |
| H | 0. 02108500  | -1. 05345300 | -3. 53695400 |
| C | 1. 93665600  | 1. 26642700  | -5. 14732700 |
| H | 1. 81781500  | 2. 15282300  | -5. 76450500 |
| C | 3. 18623300  | 0. 80554100  | -4. 82876900 |
| H | 4. 07553600  | 1. 31869700  | -5. 18743000 |
| C | 0. 66347700  | 0. 99034700  | 5. 94408100  |
| H | 1. 60907300  | 0. 66024400  | 6. 36370700  |
| C | 0. 13464300  | 2. 26070300  | 6. 30920500  |
| H | 0. 66868300  | 2. 88175700  | 7. 02335800  |
| C | -1. 03749400 | 2. 69756600  | 5. 75268600  |
| H | -1. 45075900 | 3. 66834400  | 6. 01756300  |
| C | 0. 00223200  | 0. 18307700  | 5. 05388000  |
| H | 0. 42903100  | -0. 77483500 | 4. 78209000  |
| N | 1. 50240100  | -0. 24736800 | 1. 46497900  |
| S | 2. 50801400  | -0. 94853400 | 2. 55437400  |
| C | 3. 93054300  | -1. 67898900 | 1. 53363700  |

|   |              |              |              |
|---|--------------|--------------|--------------|
| O | 1. 91281100  | -2. 10517300 | 3. 22835800  |
| O | 3. 10543000  | 0. 13756500  | 3. 33225300  |
| F | 3. 75420300  | -2. 99053100 | 1. 38506800  |
| F | 4. 00517400  | -1. 10155800 | 0. 33361600  |
| F | 5. 06984600  | -1. 46384000 | 2. 19613700  |
| H | 2. 43950000  | 2. 55859500  | 2. 22047200  |
| C | -0. 82726100 | 3. 41121000  | 1. 48690500  |
| H | -1. 32097200 | 3. 83058400  | 0. 60705600  |
| H | -1. 25080800 | 2. 43646000  | 1. 73846800  |
| H | -1. 05510100 | 4. 08073900  | 2. 33123700  |
| C | 3. 42902100  | 3. 39154200  | -0. 28695100 |
| C | 3. 79952000  | 2. 29150100  | -1. 07200800 |
| C | 4. 24424600  | 3. 69612000  | 0. 81931800  |
| C | 4. 93152500  | 1. 53024700  | -0. 76730600 |
| H | 3. 21196800  | 1. 99725900  | -1. 93460100 |
| C | 5. 36715300  | 2. 93415900  | 1. 13323200  |
| H | 4. 00427400  | 4. 54238900  | 1. 45443900  |
| C | 5. 71901000  | 1. 84376900  | 0. 33675100  |
| H | 5. 17616100  | 0. 67633300  | -1. 39037100 |
| H | 5. 96526400  | 3. 19373200  | 2. 00250700  |
| H | 6. 58864200  | 1. 24072600  | 0. 58225900  |
| C | 2. 73427000  | 5. 68449100  | -1. 17221800 |
| H | 1. 83671900  | 6. 28803300  | -1. 36709800 |
| H | 3. 17609700  | 5. 46368200  | -2. 15085900 |
| C | 3. 72031100  | 6. 54315700  | -0. 40183000 |
| C | 5. 01268000  | 6. 57492600  | -0. 74654500 |
| H | 5. 40847000  | 5. 95114600  | -1. 54360400 |
| H | 5. 72476600  | 7. 22006500  | -0. 23756000 |
| C | 3. 18771000  | 7. 44602300  | 0. 68884400  |
| H | 2. 82797200  | 6. 88872200  | 1. 56388500  |
| H | 3. 95953300  | 8. 13742000  | 1. 04050900  |
| H | 2. 33712400  | 8. 04013900  | 0. 32905400  |

TS-1-1-5R-3

l imaginary frequency

H = -5315. 351911

G = -5315. 548632

E(M06-2X-DCM) = -5316. 234135

|   |             |             |              |
|---|-------------|-------------|--------------|
| C | 2. 18766300 | 4. 29315600 | -0. 61469200 |
| C | 1. 26025600 | 4. 53242100 | 0. 62441600  |
| H | 1. 84915200 | 5. 07855700 | 1. 37325800  |
| H | 0. 46407400 | 5. 20713200 | 0. 29367800  |
| C | 0. 62103900 | 3. 37836400 | 1. 35860300  |
| C | 1. 30073200 | 3. 80595300 | -1. 79834300 |

|   |             |             |             |
|---|-------------|-------------|-------------|
| H | 1.93371700  | 3.47315600  | -2.62858700 |
| H | 0.73062300  | 4.66104700  | -2.16301400 |
| N | 0.31500600  | 2.78259200  | -1.49211600 |
| C | -1.01341700 | 2.89759300  | -1.84240400 |
| N | -1.67346000 | 1.70636300  | -1.70823100 |
| C | -3.00239300 | 1.31190800  | -1.92391000 |
| C | -4.10341700 | 2.16694300  | -2.08462900 |
| C | -3.21626600 | -0.07896500 | -1.94166200 |
| C | -5.37525700 | 1.62330300  | -2.27147900 |
| C | -4.49165700 | -0.59834500 | -2.13488700 |
| H | -2.37626800 | -0.75091500 | -1.79929500 |
| C | -5.58821700 | 0.24632900  | -2.30943000 |
| H | -6.57980000 | -0.15749100 | -2.47419000 |
| C | -4.69690100 | -2.08658500 | -2.07531800 |
| C | -6.56467100 | 2.54483100  | -2.35210600 |
| F | -3.62987700 | -2.77129000 | -2.54735700 |
| F | -5.77804100 | -2.48237900 | -2.77666300 |
| F | -4.88721500 | -2.51404100 | -0.79441500 |
| F | -6.23927900 | 3.76595100  | -2.81723800 |
| F | -7.12978200 | 2.72552100  | -1.12941500 |
| F | -7.53252200 | 2.04496500  | -3.15268900 |
| S | -1.71467400 | 4.35597200  | -2.32949000 |
| H | -3.96105500 | 3.23741000  | -2.07223400 |
| C | 1.32296600  | 2.42530500  | 2.10457200  |
| H | -1.07705600 | 0.92887500  | -1.40434300 |
| H | 0.77315900  | 2.05465100  | 2.97550200  |
| H | 0.65668500  | 1.83433700  | -1.33279000 |
| H | 1.36967400  | 1.21699200  | 1.59399300  |
| O | -0.94856400 | -1.32706300 | 0.97223000  |
| O | 1.25883700  | -2.33784400 | 0.00287900  |
| P | 0.51853400  | -0.93887600 | 0.36841500  |
| O | 0.25524300  | -0.05833100 | -0.80961000 |
| C | -1.23927800 | -3.85817000 | 4.30460100  |
| C | -0.93782300 | -4.37488800 | 3.05023800  |
| C | -0.94918600 | -3.55122700 | 1.91435300  |
| C | -1.51164200 | -1.63380800 | 3.31781500  |
| C | -1.57033800 | -2.51037100 | 4.41588100  |
| C | 0.69144800  | -3.12447100 | -1.01899100 |
| C | -0.35218500 | -3.98542300 | -0.69057600 |
| C | -1.02174000 | -4.66919900 | -1.71823600 |
| C | -0.59690400 | -4.56093300 | -3.03734600 |
| C | 0.50981400  | -3.76549800 | -3.32884600 |
| C | 1.17135700  | -3.01961000 | -2.33852700 |
| H | -1.86580600 | -2.10515200 | 5.37875400  |

|   |             |             |             |
|---|-------------|-------------|-------------|
| H | 0.87134600  | -3.69383900 | -4.35041600 |
| C | -0.89260700 | -4.42569500 | 0.66391800  |
| C | -0.09875500 | -5.65401800 | 1.21890300  |
| H | -0.25317900 | -6.55564200 | 0.61785800  |
| H | 0.97105600  | -5.41665700 | 1.20403800  |
| H | -3.09455400 | -5.32560900 | -1.76928400 |
| H | -1.96817300 | -6.53009200 | -1.14236900 |
| C | -1.12642900 | -2.17760100 | 2.07618200  |
| H | -1.24135400 | -4.49606500 | 5.18461000  |
| H | -1.11382800 | -5.09095000 | -3.83303100 |
| C | -0.58086200 | -5.79739800 | 2.67851300  |
| H | -1.45367900 | -6.46100400 | 2.75141500  |
| H | 0.18892100  | -6.21630000 | 3.33637000  |
| C | -2.18961700 | -5.45401000 | -1.16652300 |
| C | -2.33947200 | -4.87109400 | 0.25354000  |
| H | -2.77559400 | -5.57354800 | 0.96989600  |
| H | -2.98724300 | -3.98931400 | 0.21392500  |
| C | 2.36485100  | -2.21059200 | -2.74473000 |
| C | 3.66356400  | -2.68486700 | -2.43749500 |
| C | 2.19868400  | -1.05348000 | -3.54326600 |
| C | 3.89531800  | -3.87232000 | -1.67213000 |
| C | 4.81950400  | -1.97349300 | -2.93490100 |
| C | 3.36337200  | -0.35375900 | -4.03783000 |
| C | 5.16500800  | -4.30913100 | -1.39866200 |
| H | 3.04383500  | -4.43269400 | -1.30335000 |
| C | 6.12758400  | -2.46179600 | -2.62508000 |
| C | 4.63834900  | -0.83258300 | -3.72267000 |
| C | 6.29992900  | -3.59436800 | -1.87625200 |
| H | 5.31033200  | -5.21172100 | -0.81150700 |
| H | 6.98538200  | -1.91179100 | -3.00525000 |
| H | 5.51174600  | -0.30976300 | -4.10817900 |
| H | 7.29892700  | -3.95592000 | -1.64851200 |
| C | -1.93988300 | -0.21469100 | 3.53642500  |
| C | -3.13792400 | 0.26111900  | 2.94132700  |
| C | -1.23786600 | 0.59907000  | 4.46324300  |
| C | -3.92053400 | -0.51597900 | 2.02812900  |
| C | -3.63370600 | 1.57708400  | 3.28446900  |
| C | -1.76341200 | 1.89960800  | 4.81902700  |
| C | -5.06568500 | -0.01838300 | 1.46365000  |
| H | -3.59967600 | -1.52026800 | 1.77908000  |
| C | -4.82620400 | 2.06339200  | 2.66121800  |
| C | -2.94496300 | 2.34958800  | 4.22372600  |
| C | -5.52039700 | 1.29612400  | 1.76613500  |
| H | -5.62728700 | -0.63464000 | 0.76997200  |

|   |             |             |             |
|---|-------------|-------------|-------------|
| H | -5.16654300 | 3.06446300  | 2.91565100  |
| H | -3.33796600 | 3.32760800  | 4.49563900  |
| H | -6.40727200 | 1.68490700  | 1.27472600  |
| C | 0.78346900  | 0.58955400  | -4.67418700 |
| H | -0.20502300 | 0.96593600  | -4.92230800 |
| C | 0.91182700  | -0.53095800 | -3.89539100 |
| H | 0.02778700  | -1.03489000 | -3.52444600 |
| C | 1.93522600  | 1.27380100  | -5.16029700 |
| H | 1.81329500  | 2.15695500  | -5.78151100 |
| C | 3.18638200  | 0.81261500  | -4.84828700 |
| H | 4.07386700  | 1.32210600  | -5.21666100 |
| C | 0.65267000  | 1.00520700  | 5.96098500  |
| H | 1.59905500  | 0.67955600  | 6.38235200  |
| C | 0.11651500  | 2.27236000  | 6.32650900  |
| H | 0.64583600  | 2.89534600  | 7.04246900  |
| C | -1.05630200 | 2.70414100  | 5.76754200  |
| H | -1.47467300 | 3.67278700  | 6.03211700  |
| C | -0.00227000 | 0.19568600  | 5.06822000  |
| H | 0.43064100  | -0.75921600 | 4.79539600  |
| N | 1.49737700  | -0.22057000 | 1.47172900  |
| S | 2.51361000  | -0.91467500 | 2.55514700  |
| C | 3.93601100  | -1.63395100 | 1.52466700  |
| O | 1.93130700  | -2.07608700 | 3.23218600  |
| O | 3.10767900  | 0.17516900  | 3.33054700  |
| F | 3.77996600  | -2.95002500 | 1.39494500  |
| F | 3.98609600  | -1.07118500 | 0.31644100  |
| F | 5.08057200  | -1.39117100 | 2.16894500  |
| H | 2.38398700  | 2.58302100  | 2.27821400  |
| C | -0.86898300 | 3.41466900  | 1.47029000  |
| H | -1.34945000 | 3.82429200  | 0.57868100  |
| H | -1.28981100 | 2.43850900  | 1.72096800  |
| H | -1.11752000 | 4.08826500  | 2.30561000  |
| C | 3.38217600  | 3.38242800  | -0.28382700 |
| C | 3.77962700  | 2.32278000  | -1.11025000 |
| C | 4.16054400  | 3.63100200  | 0.86316000  |
| C | 4.90383800  | 1.54873400  | -0.80834100 |
| H | 3.22026500  | 2.07127400  | -2.00448900 |
| C | 5.27811900  | 2.85807000  | 1.17060600  |
| H | 3.90213300  | 4.45188200  | 1.52405200  |
| C | 5.65736700  | 1.80842900  | 0.33264000  |
| H | 5.16872500  | 0.72577800  | -1.46400600 |
| H | 5.84801900  | 3.07450800  | 2.07012000  |
| H | 6.51928100  | 1.19357000  | 0.57560200  |
| C | 2.68887800  | 5.70843500  | -1.11947000 |

|   |             |             |              |
|---|-------------|-------------|--------------|
| H | 1. 78958200 | 6. 31615100 | -1. 27514400 |
| H | 3. 12617800 | 5. 54230700 | -2. 11269200 |
| C | 3. 67276800 | 6. 51160300 | -0. 28549100 |
| C | 3. 25176900 | 7. 34064100 | 0. 67921400  |
| H | 2. 19688600 | 7. 47289300 | 0. 90805600  |
| H | 3. 94886400 | 7. 93830000 | 1. 26137300  |
| C | 5. 13170900 | 6. 41962400 | -0. 66434600 |
| H | 5. 27965200 | 6. 80110400 | -1. 68451400 |
| H | 5. 76131100 | 7. 00900100 | 0. 00958000  |
| H | 5. 49107300 | 5. 38537700 | -0. 65758000 |

TS-1-1-5R-4

l imaginary frequency

H = -5315. 341365

G = -5315. 538530

E(M06-2X-DCM) = -5316. 225332

|   |              |              |              |
|---|--------------|--------------|--------------|
| C | -2. 23387400 | 4. 64756200  | -0. 05371800 |
| C | -1. 96058800 | 4. 30043600  | 1. 45950500  |
| H | -2. 92817500 | 4. 16522100  | 1. 94602700  |
| H | -1. 52571800 | 5. 21629200  | 1. 88802000  |
| C | -1. 02341800 | 3. 21874700  | 1. 91074400  |
| C | -0. 92845900 | 4. 77828000  | -0. 87701400 |
| H | -1. 15309700 | 5. 26621700  | -1. 83400900 |
| H | -0. 22921300 | 5. 44766600  | -0. 36872600 |
| N | -0. 25658200 | 3. 51004100  | -1. 10150900 |
| C | 1. 02341400  | 3. 43550400  | -1. 59318500 |
| N | 1. 45801500  | 2. 13964600  | -1. 68510900 |
| C | 2. 66915700  | 1. 57797400  | -2. 12252100 |
| C | 3. 84876800  | 2. 28053200  | -2. 39536200 |
| C | 2. 67165100  | 0. 17360300  | -2. 24324800 |
| C | 5. 00506800  | 1. 57867800  | -2. 75172300 |
| C | 3. 82950800  | -0. 50047400 | -2. 60869500 |
| H | 1. 76318700  | -0. 38042200 | -2. 04006400 |
| C | 5. 01707900  | 0. 19310500  | -2. 86344600 |
| H | 5. 92344900  | -0. 33477400 | -3. 13486800 |
| C | 3. 81295600  | -1. 99461600 | -2. 77411900 |
| C | 6. 27981400  | 2. 36368900  | -2. 91111500 |
| F | 2. 68485200  | -2. 55497200 | -2. 27858000 |
| F | 3. 88854700  | -2. 35615800 | -4. 07957100 |
| F | 4. 85955100  | -2. 58640500 | -2. 15211800 |
| F | 7. 25058700  | 1. 64851700  | -3. 51898800 |
| F | 6. 09478400  | 3. 49174000  | -3. 62633400 |
| F | 6. 76747500  | 2. 74456000  | -1. 70130600 |
| S | 1. 88993700  | 4. 82756000  | -1. 98090800 |



|   |             |             |             |
|---|-------------|-------------|-------------|
| C | -2.84081800 | 6.10538200  | -0.04728200 |
| H | -3.12335700 | 6.34433600  | -1.07937900 |
| H | -2.02576900 | 6.78970100  | 0.21965200  |
| H | 3.86438100  | 3.35814500  | -2.31488500 |
| C | -1.49139100 | 2.08039200  | 2.58981500  |
| H | 0.88672400  | 1.45349200  | -1.18050600 |
| H | -2.51028600 | 2.11910900  | 2.97978600  |
| H | -0.77148200 | 1.61558300  | 3.26729500  |
| H | -0.84726100 | 2.68823200  | -1.17986700 |
| H | -1.61273300 | 1.11150400  | 1.79476100  |
| O | 0.27900300  | -1.70364200 | 1.86430900  |
| O | -0.47609400 | -1.83693900 | -0.63636600 |
| P | -0.36778500 | -0.83968500 | 0.64325300  |
| O | 0.44459300  | 0.33459000  | 0.21226100  |
| C | 4.22364700  | -3.05432100 | 1.41963900  |
| C | 3.16188700  | -3.76657200 | 0.87380700  |
| C | 1.83825900  | -3.35483800 | 1.09064900  |
| C | 2.64638000  | -1.44802900 | 2.38528800  |
| C | 3.95440500  | -1.93069500 | 2.19758500  |
| C | -1.07330100 | -3.10732200 | -0.68884200 |
| C | -0.52615900 | -4.17058200 | 0.03172800  |
| C | -1.27184300 | -5.35350400 | 0.16392700  |
| C | -2.44061100 | -5.53983200 | -0.56307300 |
| C | -2.84743900 | -4.54231900 | -1.44428200 |
| C | -2.19531200 | -3.29773600 | -1.52283400 |
| H | 4.77154100  | -1.39153900 | 2.66688600  |
| H | -3.70848500 | -4.70911100 | -2.08294400 |
| C | 0.87168600  | -4.42083400 | 0.59830600  |
| C | 1.75585600  | -5.12042900 | -0.49582000 |
| H | 1.43898400  | -6.14992000 | -0.68440300 |
| H | 1.66122100  | -4.56781900 | -1.43434400 |
| H | -0.20379600 | -7.19301100 | 0.60605200  |
| H | -1.29412200 | -6.68117400 | 1.88844900  |
| C | 1.60052300  | -2.16604900 | 1.77260300  |
| H | 5.24965600  | -3.37428300 | 1.25841800  |
| H | -3.00902400 | -6.46265500 | -0.48047600 |
| C | 3.20551200  | -5.01212900 | 0.02054700  |
| H | 3.93416100  | -4.92337200 | -0.79268600 |
| H | 3.49284700  | -5.89046300 | 0.61511300  |
| C | -0.59972000 | -6.30995500 | 1.12586800  |
| C | 0.53291800  | -5.44847100 | 1.72598600  |
| H | 0.16220200  | -4.90203900 | 2.60110300  |
| H | 1.40712200  | -6.03016400 | 2.03519800  |
| C | -2.68468800 | -2.32640100 | -2.55207800 |

|   |             |             |             |
|---|-------------|-------------|-------------|
| C | -4.06024800 | -1.97011600 | -2.58055900 |
| C | -1.82977800 | -1.92212600 | -3.61424000 |
| C | -4.97021500 | -2.28825500 | -1.51845600 |
| C | -4.59552800 | -1.26363900 | -3.72229400 |
| C | -2.36942100 | -1.14373200 | -4.70793300 |
| C | -6.30781100 | -1.99888600 | -1.61279500 |
| H | -4.58370900 | -2.74261700 | -0.61510300 |
| C | -6.00102200 | -1.00393500 | -3.79221000 |
| C | -3.73545200 | -0.85494100 | -4.74278300 |
| C | -6.84023900 | -1.37066900 | -2.77459200 |
| H | -6.96953200 | -2.24851800 | -0.78782900 |
| H | -6.38641100 | -0.50500900 | -4.67889000 |
| H | -4.14033100 | -0.31070400 | -5.59387100 |
| H | -7.90675200 | -1.17216000 | -2.84132900 |
| C | 2.45577100  | -0.25574600 | 3.26863200  |
| C | 3.07935400  | 0.97394700  | 2.93365800  |
| C | 1.78029900  | -0.39505800 | 4.50915100  |
| C | 3.75683800  | 1.19129800  | 1.68838100  |
| C | 3.04630600  | 2.07240000  | 3.87433700  |
| C | 1.70988900  | 0.73068000  | 5.41498100  |
| C | 4.39340900  | 2.37501300  | 1.41506700  |
| H | 3.75429000  | 0.40105600  | 0.94736000  |
| C | 3.72400400  | 3.29098400  | 3.55135900  |
| C | 2.35091500  | 1.92669400  | 5.07802600  |
| C | 4.38636700  | 3.43837600  | 2.36263100  |
| H | 4.90932100  | 2.50710300  | 0.46852100  |
| H | 3.70254200  | 4.09922100  | 4.27915500  |
| H | 2.32515400  | 2.75777900  | 5.78057400  |
| H | 4.90049100  | 4.36684200  | 2.13068500  |
| C | 0.34803100  | -1.86955900 | -4.73566200 |
| H | 1.39360300  | -2.16043800 | -4.76188000 |
| C | -0.44613100 | -2.28435900 | -3.69738000 |
| H | -0.01444900 | -2.90690500 | -2.92460500 |
| C | -0.18267500 | -1.06463700 | -5.78230500 |
| H | 0.46298600  | -0.73914200 | -6.59327800 |
| C | -1.50640700 | -0.72112100 | -5.76739000 |
| H | -1.93506300 | -0.12471400 | -6.56947400 |
| C | 0.54544400  | -1.72526400 | 6.14810300  |
| H | 0.10522300  | -2.67290400 | 6.44601500  |
| C | 0.44651200  | -0.60260900 | 7.01736100  |
| H | -0.07247200 | -0.69978700 | 7.96697300  |
| C | 1.01816300  | 0.58777400  | 6.65897100  |
| H | 0.96881800  | 1.44919700  | 7.32103200  |
| C | 1.18987700  | -1.62539300 | 4.94296400  |

|   |             |             |             |
|---|-------------|-------------|-------------|
| H | 1.26068400  | -2.49630300 | 4.30290900  |
| N | -1.79920900 | -0.31640400 | 1.26883500  |
| S | -3.05134700 | -1.09226800 | 1.95047900  |
| C | -2.52371700 | -1.51343300 | 3.70556200  |
| O | -4.11410300 | -0.09894400 | 2.14019500  |
| O | -3.33711600 | -2.39356100 | 1.34293600  |
| F | -3.61550900 | -1.81339600 | 4.41377500  |
| F | -1.91586600 | -0.46194100 | 4.27429800  |
| F | -1.69773700 | -2.56077200 | 3.72106400  |
| C | -3.20136500 | 3.66891500  | -0.74222400 |
| C | -3.79211900 | 2.57522300  | -0.09660200 |
| C | -3.55348800 | 3.89923800  | -2.08642300 |
| C | -4.72056600 | 1.75983400  | -0.74997200 |
| H | -3.55950400 | 2.33612300  | 0.93231800  |
| C | -4.48158400 | 3.09262800  | -2.73863700 |
| H | -3.10845500 | 4.72479100  | -2.63458300 |
| C | -5.07937200 | 2.02330600  | -2.06903500 |
| H | -5.14848600 | 0.91850600  | -0.21466500 |
| H | -4.73754400 | 3.30236900  | -3.77394000 |
| H | -5.80304300 | 1.39198800  | -2.57252400 |
| C | -4.02080000 | 6.38872000  | 0.86344300  |
| C | -3.86019300 | 7.13932900  | 1.96098300  |
| H | -4.69499100 | 7.38222900  | 2.61369400  |
| H | -2.89358200 | 7.55248400  | 2.24068300  |
| C | -5.38033700 | 5.86691000  | 0.46190700  |
| H | -6.15661500 | 6.22902000  | 1.14288100  |
| H | -5.63679800 | 6.19295100  | -0.55462900 |
| H | -5.41624300 | 4.77236800  | 0.45093000  |
| C | 0.44955700  | 3.42847100  | 1.82204600  |
| H | 0.94440600  | 2.51707800  | 1.46981900  |
| H | 0.74618900  | 4.27353000  | 1.20347800  |
| H | 0.82184600  | 3.59462600  | 2.84337400  |

TS-1-1-5R-5

l imaginary frequency

H = -5315.338726

G = -5315.535849

E(M06-2X-DCM) = -5316.224476

|   |             |            |             |
|---|-------------|------------|-------------|
| C | -2.03466300 | 4.70480600 | -0.33077400 |
| C | -1.76517800 | 4.48042600 | 1.20667700  |
| H | -2.73668900 | 4.45851800 | 1.70467000  |
| H | -1.24719700 | 5.39162400 | 1.53876100  |
| C | -0.91097500 | 3.36433200 | 1.73446400  |
| C | -0.71833900 | 4.75314100 | -1.14331400 |

|   |             |             |             |
|---|-------------|-------------|-------------|
| H | -0.91161600 | 5.19423700  | -2.12941700 |
| H | -0.00721600 | 5.42981100  | -0.66148200 |
| N | -0.08362300 | 3.45416000  | -1.28469600 |
| C | 1.19933400  | 3.30585800  | -1.74904800 |
| N | 1.58106700  | 1.99020700  | -1.77049600 |
| C | 2.76961100  | 1.35594500  | -2.16627600 |
| C | 3.97829900  | 1.99273600  | -2.47133400 |
| C | 2.71364200  | -0.05208200 | -2.20940000 |
| C | 5.10520700  | 1.22453000  | -2.78236000 |
| C | 3.84274600  | -0.79279500 | -2.53282700 |
| H | 1.78200000  | -0.55588500 | -1.98126500 |
| C | 5.05923300  | -0.16433100 | -2.81882600 |
| H | 5.94323700  | -0.74362200 | -3.05716600 |
| C | 3.76400000  | -2.29172300 | -2.61824600 |
| C | 6.41187500  | 1.94629900  | -2.97840000 |
| F | 2.60359200  | -2.77618200 | -2.11731900 |
| F | 3.84790400  | -2.72570100 | -3.90078300 |
| F | 4.77208300  | -2.89306100 | -1.94392400 |
| F | 7.35648000  | 1.15677300  | -3.53311400 |
| F | 6.27715900  | 3.03479300  | -3.76296700 |
| F | 6.90671300  | 2.38089000  | -1.79003000 |
| S | 2.12773700  | 4.64179200  | -2.18796400 |
| C | -2.64264100 | 6.15612200  | -0.45899800 |
| H | -2.90807000 | 6.29370500  | -1.51160300 |
| H | -1.83540500 | 6.87065800  | -0.24756000 |
| H | 4.03846400  | 3.07166000  | -2.45057800 |
| C | -1.45938300 | 2.28789900  | 2.45443300  |
| H | 0.97183400  | 1.35444100  | -1.24463800 |
| H | -2.48035700 | 2.40313100  | 2.82240900  |
| H | -0.77923600 | 1.81807700  | 3.16870700  |
| H | -0.70051100 | 2.64883800  | -1.32038400 |
| H | -1.61549000 | 1.29293100  | 1.70758400  |
| O | 0.17670700  | -1.58970300 | 1.94629000  |
| O | -0.56349200 | -1.82851300 | -0.55181700 |
| P | -0.43334500 | -0.76993300 | 0.67603000  |
| O | 0.42406800  | 0.35102700  | 0.19215700  |
| C | 4.06187200  | -3.13266900 | 1.61048300  |
| C | 2.97316400  | -3.82720300 | 1.09599200  |
| C | 1.66755400  | -3.34637500 | 1.27728400  |
| C | 2.55019800  | -1.40902000 | 2.47353000  |
| C | 3.83704300  | -1.95739500 | 2.32328300  |
| C | -1.21438700 | -3.07329500 | -0.54453900 |
| C | -0.72207900 | -4.11693100 | 0.24124100  |
| C | -1.51953700 | -5.25747500 | 0.42995900  |

|   |             |             |             |
|---|-------------|-------------|-------------|
| C | -2.68717400 | -5.43432000 | -0.30122600 |
| C | -3.03936900 | -4.47236000 | -1.24331400 |
| C | -2.33288200 | -3.26309700 | -1.38335200 |
| H | 4.67387300  | -1.42974000 | 2.77041800  |
| H | -3.89878800 | -4.63890400 | -1.88415200 |
| C | 0.65842500  | -4.39515500 | 0.83601300  |
| C | 1.51879400  | -5.19308800 | -0.20870300 |
| H | 1.15746300  | -6.21633000 | -0.34351900 |
| H | 1.45617200  | -4.68961500 | -1.17721100 |
| H | -0.53712500 | -7.11334600 | 0.98707000  |
| H | -1.61575700 | -6.48317200 | 2.22609400  |
| C | 1.47741500  | -2.11217700 | 1.89036100  |
| H | 5.07378100  | -3.50552600 | 1.47616500  |
| H | -3.29637800 | -6.32561200 | -0.17478400 |
| C | 2.96761000  | -5.12021500 | 0.31547800  |
| H | 3.70613600  | -5.11090800 | -0.49357800 |
| H | 3.21010500  | -5.97480700 | 0.96235400  |
| C | -0.89886600 | -6.18606800 | 1.45193800  |
| C | 0.26504400  | -5.34176400 | 2.01575000  |
| H | -0.08943600 | -4.73093800 | 2.85423700  |
| H | 1.10996700  | -5.94236200 | 2.36732400  |
| C | -2.76530400 | -2.33615700 | -2.47710600 |
| C | -4.12571900 | -1.93169600 | -2.55383600 |
| C | -1.87794400 | -2.03055100 | -3.54576000 |
| C | -5.06348500 | -2.14592600 | -1.48998300 |
| C | -4.61603100 | -1.28371100 | -3.74921900 |
| C | -2.37010300 | -1.30441400 | -4.69642900 |
| C | -6.38862200 | -1.81996100 | -1.62963100 |
| H | -4.70779500 | -2.55055700 | -0.55078700 |
| C | -6.01036900 | -0.98285800 | -3.86377800 |
| C | -3.72422900 | -0.97178100 | -4.77672800 |
| C | -6.87922800 | -1.25465600 | -2.84111700 |
| H | -7.07258000 | -1.99096800 | -0.80274800 |
| H | -6.36293200 | -0.52996600 | -4.78798300 |
| H | -4.09483500 | -0.47146200 | -5.66942600 |
| H | -7.93709100 | -1.02633300 | -2.94181800 |
| C | 2.40830200  | -0.16682600 | 3.29514600  |
| C | 3.08970200  | 1.01528300  | 2.90593600  |
| C | 1.72192600  | -0.21515400 | 4.53664600  |
| C | 3.78287500  | 1.14063400  | 1.65661600  |
| C | 3.10237200  | 2.15854400  | 3.79219200  |
| C | 1.69920400  | 0.95509400  | 5.38679700  |
| C | 4.47379200  | 2.27970800  | 1.33067500  |
| H | 3.74843400  | 0.31588400  | 0.95497400  |

|   |              |              |              |
|---|--------------|--------------|--------------|
| C | 3. 83605500  | 3. 32818400  | 3. 41511500  |
| C | 2. 39552500  | 2. 10311600  | 4. 99676200  |
| C | 4. 51005700  | 3. 38743400  | 2. 22528600  |
| H | 4. 99968000  | 2. 34215000  | 0. 38246900  |
| H | 3. 84760500  | 4. 17119600  | 4. 10257700  |
| H | 2. 40484300  | 2. 96751400  | 5. 65835400  |
| H | 5. 06655700  | 4. 27949000  | 1. 95196100  |
| C | 0. 31909100  | -2. 12642500 | -4. 62650000 |
| H | 1. 35345300  | -2. 45587800 | -4. 61464000 |
| C | -0. 50736000 | -2. 44659700 | -3. 57997000 |
| H | -0. 11174600 | -3. 03435600 | -2. 76206000 |
| C | -0. 16385400 | -1. 37069500 | -5. 73129600 |
| H | 0. 50692200  | -1. 12013100 | -6. 54848400 |
| C | -1. 47425100 | -0. 98041900 | -5. 76338500 |
| H | -1. 86719900 | -0. 42135400 | -6. 60947300 |
| C | 0. 42262600  | -1. 40768400 | 6. 23084000  |
| H | -0. 06090300 | -2. 31909800 | 6. 57157000  |
| C | 0. 37129900  | -0. 24096800 | 7. 04436600  |
| H | -0. 15482200 | -0. 26869200 | 7. 99462100  |
| C | 0. 99715300  | 0. 90386700  | 6. 63214400  |
| H | 0. 98450100  | 1. 79768500  | 7. 25162800  |
| C | 1. 07489400  | -1. 39523000 | 5. 02585500  |
| H | 1. 10822300  | -2. 29837900 | 4. 42896600  |
| N | -1. 84926700 | -0. 16747600 | 1. 26048500  |
| S | -3. 13084000 | -0. 85824900 | 1. 97721200  |
| C | -2. 61501600 | -1. 22638600 | 3. 74768000  |
| O | -4. 14877000 | 0. 18642500  | 2. 13098200  |
| O | -3. 47665900 | -2. 16985300 | 1. 42525200  |
| F | -3. 71600900 | -1. 44595900 | 4. 47111900  |
| F | -1. 95933800 | -0. 17819100 | 4. 26777100  |
| F | -1. 83592600 | -2. 30778000 | 3. 80989800  |
| C | -3. 01977000 | 3. 69029900  | -0. 93413600 |
| C | -3. 75618200 | 2. 77611500  | -0. 17185100 |
| C | -3. 26153200 | 3. 72414800  | -2. 32183900 |
| C | -4. 70598400 | 1. 93680500  | -0. 75959300 |
| H | -3. 61868200 | 2. 69830100  | 0. 89803200  |
| C | -4. 21427500 | 2. 89684600  | -2. 90965700 |
| H | -2. 71148600 | 4. 41319400  | -2. 95636100 |
| C | -4. 94849500 | 2. 00217100  | -2. 12829500 |
| H | -5. 24022200 | 1. 22956100  | -0. 13391300 |
| H | -4. 37962400 | 2. 95016100  | -3. 98248400 |
| H | -5. 68793700 | 1. 35261100  | -2. 58314400 |
| C | -3. 84636500 | 6. 49391600  | 0. 41062500  |
| C | -5. 07913400 | 6. 07639000  | 0. 10065400  |

|   |             |            |             |
|---|-------------|------------|-------------|
| H | -5.93418400 | 6.33106300 | 0.72224900  |
| H | -5.28170900 | 5.47101200 | -0.77741000 |
| C | -3.59528700 | 7.38016300 | 1.60972200  |
| H | -4.51747000 | 7.57194500 | 2.16663600  |
| H | -2.86738000 | 6.94338700 | 2.30635000  |
| H | -3.18116900 | 8.34895300 | 1.29758400  |
| C | 0.57244200  | 3.47921100 | 1.66120400  |
| H | 1.01575300  | 2.52191100 | 1.36679900  |
| H | 0.92802100  | 4.27086700 | 1.00382200  |
| H | 0.93958400  | 3.67786300 | 2.67882700  |

TS-1-2-5S

l imaginary frequency

H = -5315.346483

G = -5315.547863

E(M06-2X-DCM) = -5316.237966

|   |             |             |             |
|---|-------------|-------------|-------------|
| O | -2.02000900 | 0.01809200  | 1.96103400  |
| O | -3.02165300 | -1.43756000 | 0.05632200  |
| P | -1.86012300 | -0.34954100 | 0.39173400  |
| O | -2.07521600 | 0.97965400  | -0.31926400 |
| N | -0.43858100 | -1.08725100 | 0.20873800  |
| S | 0.01458400  | -1.93479900 | -1.06257700 |
| C | -0.26825200 | -3.72064400 | -0.57573600 |
| F | 0.09369300  | -4.50973300 | -1.58886300 |
| F | 0.46885800  | -4.02640900 | 0.49888200  |
| F | -1.55567900 | -3.93000000 | -0.29119500 |
| C | 0.61801700  | 3.93984400  | -0.92532200 |
| C | 0.86712600  | 3.33743600  | -2.35057200 |
| H | 0.55048800  | 4.07841400  | -3.09823300 |
| H | 1.94806800  | 3.23039500  | -2.47144900 |
| C | 0.20338300  | 2.05023300  | -2.75609700 |
| C | 1.01216400  | 2.86006700  | 0.15666600  |
| H | 0.10336800  | 2.46066900  | 0.60369500  |
| H | 1.59262100  | 3.33155800  | 0.95136800  |
| N | 1.71475900  | 1.66520800  | -0.32714300 |
| C | 3.07962400  | 1.51910200  | -0.42874800 |
| N | 3.43063400  | 0.23872700  | -0.76702600 |
| C | 4.69237200  | -0.37677300 | -0.90204600 |
| C | 5.87678000  | 0.28337300  | -1.25879100 |
| C | 4.71837700  | -1.76719500 | -0.71311900 |
| C | 7.06150200  | -0.44461400 | -1.38118800 |
| C | 5.91233600  | -2.47319800 | -0.83221200 |
| H | 3.80092200  | -2.29070800 | -0.46772300 |
| C | 7.09959600  | -1.82098600 | -1.16158000 |

|   |             |             |             |
|---|-------------|-------------|-------------|
| H | 8.02621300  | -2.37264100 | -1.25830900 |
| C | 5.90455100  | -3.94464200 | -0.51893000 |
| C | 8.33626200  | 0.28968200  | -1.70757500 |
| F | 5.79849200  | -4.16093400 | 0.82077100  |
| F | 7.03157800  | -4.56298800 | -0.92728500 |
| F | 4.85890200  | -4.57784800 | -1.09106600 |
| F | 9.22889400  | -0.50990300 | -2.33451100 |
| F | 8.94324100  | 0.75507000  | -0.59154300 |
| F | 8.11469800  | 1.35499900  | -2.50777900 |
| S | 4.15636800  | 2.79136200  | -0.19451200 |
| C | 1.57460000  | 5.20004500  | -0.85855700 |
| H | 2.59471600  | 4.82991800  | -0.98091700 |
| H | 1.34037400  | 5.82198400  | -1.73318300 |
| H | 5.87289100  | 1.34835900  | -1.43601300 |
| C | -1.16609200 | 1.81749700  | -2.62875500 |
| H | 2.66449200  | -0.43880000 | -0.81923400 |
| H | -1.81764000 | 2.68327900  | -2.51666100 |
| H | -1.57065100 | 1.00203200  | -3.22958500 |
| O | 1.48582700  | -1.84833400 | -1.18954600 |
| H | 1.19346300  | 0.80250400  | -0.18123300 |
| O | -0.78001000 | -1.71864600 | -2.28256000 |
| H | -1.41742800 | 1.33737800  | -1.46045300 |
| C | -7.00076700 | -0.17691700 | 0.45167300  |
| C | -6.26954700 | -0.57585000 | 1.56507300  |
| C | -4.96893300 | -1.08367500 | 1.42141400  |
| C | -5.09497800 | -0.71405300 | -0.99002100 |
| C | -6.42275400 | -0.28637600 | -0.81209300 |
| C | -1.93898700 | -0.97551200 | 2.94885400  |
| C | -3.04650500 | -1.78612600 | 3.19391200  |
| C | -2.91423200 | -2.86765000 | 4.08021700  |
| C | -1.73973100 | -3.05786700 | 4.79895300  |
| C | -0.69019000 | -2.15754700 | 4.62918100  |
| C | -0.75165800 | -1.10905400 | 3.69418100  |
| H | -6.99631500 | -0.01554800 | -1.69332400 |
| H | 0.21719600  | -2.26935600 | 5.21436500  |
| C | -4.50143900 | -1.67528700 | 2.74598100  |
| C | -5.33265500 | -0.80189300 | 3.74600000  |
| H | -5.44720400 | -1.28064500 | 4.72311900  |
| H | -4.81089100 | 0.14979000  | 3.89966600  |
| H | -3.96480300 | -4.77738700 | 4.03370600  |
| H | -4.74363100 | -3.54945100 | 5.02539100  |
| C | -4.37113300 | -1.06960600 | 0.16368800  |
| H | -8.01369300 | 0.20317800  | 0.55758800  |
| H | -1.64109400 | -3.88713500 | 5.49477400  |



|   |             |             |             |
|---|-------------|-------------|-------------|
| C | -6.67379700 | -0.55176900 | 3.02295800  |
| H | -7.40425400 | -1.34146900 | 3.24733300  |
| H | -7.13967300 | 0.39713500  | 3.31231700  |
| C | -4.17475100 | -3.70369900 | 4.09786500  |
| C | -4.94303400 | -3.17297500 | 2.86974700  |
| H | -6.02858700 | -3.28286100 | 2.95218900  |
| H | -4.61961200 | -3.70947200 | 1.97026900  |
| C | 0.41233500  | -0.17728600 | 3.58576700  |
| C | 0.26580700  | 1.18527100  | 3.95320300  |
| C | 1.68979200  | -0.68814500 | 3.24170300  |
| C | -0.98153300 | 1.75711800  | 4.36507700  |
| C | 1.42377800  | 2.05143100  | 3.95354200  |
| C | 2.84513400  | 0.17911400  | 3.29985300  |
| C | -1.08658200 | 3.08129000  | 4.70473700  |
| H | -1.85874000 | 1.12327000  | 4.41828400  |
| C | 1.27007300  | 3.42937300  | 4.30650100  |
| C | 2.67931100  | 1.52468800  | 3.63763000  |
| C | 0.05093900  | 3.93705000  | 4.66584500  |
| H | -2.04737800 | 3.48269800  | 5.01661700  |
| H | 2.15187200  | 4.06468500  | 4.28680700  |
| H | 3.54984400  | 2.17618600  | 3.65899100  |
| H | -0.05185800 | 4.98509500  | 4.93315000  |
| C | -4.54405200 | -0.80689500 | -2.37671200 |
| C | -4.20819500 | -2.07080300 | -2.92395600 |
| C | -4.45881100 | 0.36064100  | -3.17635900 |
| C | -4.31552600 | -3.29382300 | -2.18807100 |
| C | -3.76400500 | -2.15797700 | -4.29646200 |
| C | -4.05092300 | 0.25084700  | -4.55967900 |
| C | -3.97525500 | -4.49731900 | -2.74743700 |
| H | -4.67884400 | -3.26378300 | -1.16767400 |
| C | -3.41469500 | -3.43269600 | -4.84144300 |
| C | -3.70684000 | -1.00077200 | -5.07700500 |
| C | -3.51016200 | -4.57206000 | -4.09059200 |
| H | -4.06324000 | -5.40805100 | -2.16126500 |
| H | -3.07228800 | -3.47396000 | -5.87265100 |
| H | -3.39253400 | -1.07744000 | -6.11604200 |
| H | -3.23995400 | -5.53512300 | -4.51474000 |
| C | 3.15969900  | -2.51633200 | 2.55339200  |
| H | 3.29444700  | -3.54418400 | 2.22787100  |
| C | 1.90188900  | -2.04254700 | 2.82291100  |
| H | 1.04550500  | -2.69251400 | 2.69552500  |
| C | 4.30016800  | -1.67097600 | 2.66936700  |
| H | 5.28454000  | -2.07266600 | 2.45146800  |
| C | 4.14067400  | -0.35676600 | 3.01509700  |

|   |             |            |             |
|---|-------------|------------|-------------|
| H | 4.99627500  | 0.31108100 | 3.07376800  |
| C | -4.68415700 | 2.77768600 | -3.48497800 |
| H | -4.89901300 | 3.75896400 | -3.07125400 |
| C | -4.32140700 | 2.65647900 | -4.85709700 |
| H | -4.28727200 | 3.54169500 | -5.48667700 |
| C | -4.00477900 | 1.42823700 | -5.37162400 |
| H | -3.71116700 | 1.32149400 | -6.41346000 |
| C | -4.74504000 | 1.67292500 | -2.67469300 |
| H | -4.99404200 | 1.79020000 | -1.62673300 |
| C | -0.82556200 | 4.45139900 | -0.72782800 |
| C | -1.47222500 | 5.16661700 | -1.75242700 |
| C | -1.49944900 | 4.34611800 | 0.49885700  |
| C | -2.73761200 | 5.72431000 | -1.57419700 |
| H | -0.98438900 | 5.30894600 | -2.71283000 |
| C | -2.76651900 | 4.90505600 | 0.68320700  |
| H | -1.04263400 | 3.84662100 | 1.34485300  |
| C | -3.39690700 | 5.59360500 | -0.35068800 |
| H | -3.20249600 | 6.26895000 | -2.39211800 |
| H | -3.25543600 | 4.79799000 | 1.64762200  |
| H | -4.38215700 | 6.02831200 | -0.20577700 |
| C | 1.51576900  | 6.07583000 | 0.38430900  |
| C | 2.33591300  | 5.85732800 | 1.42060000  |
| H | 3.06049700  | 5.04822500 | 1.41868300  |
| H | 2.31903700  | 6.50196100 | 2.29679800  |
| C | 0.57912300  | 7.26259900 | 0.37147200  |
| H | -0.46975500 | 6.96693800 | 0.26799000  |
| H | 0.67840500  | 7.85282500 | 1.28820500  |
| H | 0.80636900  | 7.92140100 | -0.47866900 |
| C | 1.04998300  | 1.03973800 | -3.45972500 |
| H | 2.05473800  | 0.96536800 | -3.03799200 |
| H | 0.57539800  | 0.05599200 | -3.49146400 |
| H | 1.16585800  | 1.39071700 | -4.49859800 |

TS-1-2-5S-1

l imaginary frequency

H = -5315.346397

G = -5315.547638

E(M06-2X-DCM) = -5316.237871

|   |             |             |             |
|---|-------------|-------------|-------------|
| O | -2.02245900 | 0.02528200  | 1.95903700  |
| O | -3.01782800 | -1.44173200 | 0.05975900  |
| P | -1.85928400 | -0.34947200 | 0.39175000  |
| O | -2.07622100 | 0.97565000  | -0.32630400 |
| N | -0.43569800 | -1.08472700 | 0.21506500  |
| S | 0.02326100  | -1.93159500 | -1.05456900 |

|   |             |             |             |
|---|-------------|-------------|-------------|
| C | -0.25160500 | -3.71791500 | -0.56516400 |
| F | 0.11281700  | -4.50686300 | -1.57748400 |
| F | 0.48751700  | -4.01929300 | 0.50933700  |
| F | -1.53799200 | -3.93185400 | -0.27944300 |
| C | 0.60875300  | 3.94116400  | -0.93578000 |
| C | 0.86571900  | 3.33343200  | -2.35729200 |
| H | 0.54931300  | 4.06987600  | -3.10952400 |
| H | 1.94753400  | 3.22990200  | -2.47336600 |
| C | 0.20843500  | 2.04192200  | -2.75974800 |
| C | 1.00395900  | 2.86811100  | 0.15250300  |
| H | 0.09529500  | 2.46689800  | 0.59819800  |
| H | 1.57945000  | 3.34593000  | 0.94704500  |
| N | 1.71347700  | 1.67369300  | -0.32265800 |
| C | 3.07959900  | 1.53262000  | -0.41688800 |
| N | 3.43746900  | 0.25060900  | -0.74101200 |
| C | 4.69946900  | -0.36532700 | -0.87120100 |
| C | 5.89306300  | 0.29592100  | -1.19430000 |
| C | 4.71799800  | -1.75876200 | -0.70137400 |
| C | 7.07705200  | -0.43493700 | -1.30668200 |
| C | 5.91203300  | -2.46651000 | -0.80572800 |
| H | 3.79568900  | -2.28260900 | -0.47583600 |
| C | 7.10729100  | -1.81410800 | -1.10452400 |
| H | 8.03646100  | -2.36523000 | -1.17751200 |
| C | 5.89821400  | -3.93864800 | -0.49619500 |
| C | 8.33763500  | 0.27814100  | -1.72308600 |
| F | 5.80003000  | -4.15821600 | 0.84366300  |
| F | 7.01957700  | -4.56166000 | -0.91326800 |
| F | 4.84573800  | -4.56464900 | -1.06340200 |
| F | 9.44326200  | -0.33998600 | -1.24934400 |
| F | 8.36701400  | 1.55446500  | -1.28714100 |
| F | 8.46061500  | 0.31983500  | -3.07152500 |
| S | 4.14833800  | 2.81306200  | -0.19034500 |
| C | 1.55900700  | 5.20627600  | -0.87134200 |
| H | 2.58128400  | 4.84061700  | -0.98873600 |
| H | 1.32463300  | 5.82323400  | -1.74943800 |
| H | 5.89914700  | 1.36599100  | -1.33792900 |
| C | -1.16056900 | 1.80440400  | -2.63657500 |
| H | 2.67258700  | -0.42801100 | -0.79588200 |
| H | -1.81589300 | 2.66818900  | -2.53120800 |
| H | -1.55965200 | 0.98430400  | -3.23472100 |
| O | 1.49416900  | -1.83744000 | -1.18028300 |
| H | 1.19508600  | 0.80973700  | -0.17401500 |
| O | -0.77100700 | -1.72160600 | -2.27582300 |
| H | -1.41512000 | 1.32961000  | -1.46652600 |

|   |             |             |             |
|---|-------------|-------------|-------------|
| C | -6.99927300 | -0.18293500 | 0.43719100  |
| C | -6.27053500 | -0.57440000 | 1.55486500  |
| C | -4.96916200 | -1.08199500 | 1.41751300  |
| C | -5.08931800 | -0.72702100 | -0.99641600 |
| C | -6.41797300 | -0.29962100 | -0.82443300 |
| C | -1.94293100 | -0.96372900 | 2.95162100  |
| C | -3.05073400 | -1.77344900 | 3.19853500  |
| C | -2.91993600 | -2.85043400 | 4.09057600  |
| C | -1.74667500 | -3.03704200 | 4.81226400  |
| C | -0.69685200 | -2.13761700 | 4.63971500  |
| C | -0.75687000 | -1.09363200 | 3.69958800  |
| H | -6.98958200 | -0.03474000 | -1.70873400 |
| H | 0.20964000  | -2.24657900 | 5.22682100  |
| C | -4.50468600 | -1.66559400 | 2.74666000  |
| C | -5.33883800 | -0.78685400 | 3.73948000  |
| H | -5.45558300 | -1.25996200 | 4.71909200  |
| H | -4.81801100 | 0.16602000  | 3.88888500  |
| H | -3.97016900 | -4.76054900 | 4.05256500  |
| H | -4.75110900 | -3.52717200 | 5.03581900  |
| C | -4.36812900 | -1.07489700 | 0.16128900  |
| H | -8.01280200 | 0.19689200  | 0.53820000  |
| H | -1.64921100 | -3.86285100 | 5.51235100  |
| C | -6.67834900 | -0.54178700 | 3.01161100  |
| H | -7.40896900 | -1.33047800 | 3.23897100  |
| H | -7.14539800 | 0.40860700  | 3.29411400  |
| C | -4.18035500 | -3.68654500 | 4.11031000  |
| C | -4.94616600 | -3.16272000 | 2.87774800  |
| H | -6.03186300 | -3.27238800 | 2.95850600  |
| H | -4.62078100 | -3.70408000 | 1.98190100  |
| C | 0.40754300  | -0.16259400 | 3.58909300  |
| C | 0.26115700  | 1.20128800  | 3.95152100  |
| C | 1.68524300  | -0.67531900 | 3.24879500  |
| C | -0.98672400 | 1.77539200  | 4.35858100  |
| C | 1.41974600  | 2.06663500  | 3.95142200  |
| C | 2.84107400  | 0.19129200  | 3.30640000  |
| C | -1.09157300 | 3.10079200  | 4.69350900  |
| H | -1.86451300 | 1.14234300  | 4.41180900  |
| C | 1.26626000  | 3.44582400  | 4.29954700  |
| C | 2.67556500  | 1.53799200  | 3.63982800  |
| C | 0.04668700  | 3.95556100  | 4.65444100  |
| H | -2.05279500 | 3.50398800  | 5.00174100  |
| H | 2.14857000  | 4.08043100  | 4.27977600  |
| H | 3.54647900  | 2.18899800  | 3.66089900  |
| H | -0.05596000 | 5.00456500  | 4.91799200  |

|   |             |             |             |
|---|-------------|-------------|-------------|
| C | -4.53448700 | -0.82763000 | -2.38099100 |
| C | -4.19517900 | -2.09442000 | -2.91939300 |
| C | -4.44857100 | 0.33504100  | -3.18763000 |
| C | -4.30323200 | -3.31306000 | -2.17637600 |
| C | -3.74643600 | -2.18942100 | -4.28988800 |
| C | -4.03612400 | 0.21726600  | -4.56894300 |
| C | -3.95942900 | -4.51949100 | -2.72720800 |
| H | -4.67003100 | -3.27729700 | -1.15740500 |
| C | -3.39348400 | -3.46695300 | -4.82585600 |
| C | -3.68843000 | -1.03698600 | -5.07737500 |
| C | -3.48976200 | -4.60182100 | -4.06832400 |
| H | -4.04813600 | -5.42673700 | -2.13575800 |
| H | -3.04761600 | -3.51405300 | -5.85565600 |
| H | -3.37059100 | -1.11959500 | -6.11487700 |
| H | -3.21676800 | -5.56707700 | -4.48564700 |
| C | 3.15477600  | -2.50635500 | 2.56720400  |
| H | 3.28920500  | -3.53497000 | 2.24400800  |
| C | 1.89699500  | -2.03100900 | 2.83406200  |
| H | 1.04030000  | -2.68067100 | 2.70729600  |
| C | 4.29569200  | -1.66160400 | 2.68299900  |
| H | 5.28007400  | -2.06469400 | 2.46770000  |
| C | 4.13666200  | -0.34646400 | 3.02542200  |
| H | 4.99267700  | 0.32087300  | 3.08413400  |
| C | -4.67713100 | 2.74969500  | -3.51223300 |
| H | -4.89507800 | 3.73316200  | -3.10538400 |
| C | -4.30976900 | 2.62050400  | -4.88238900 |
| H | -4.27515200 | 3.50179200  | -5.51742700 |
| C | -3.98932300 | 1.38960400  | -5.38812100 |
| H | -3.69215200 | 1.27680600  | -6.42830700 |
| C | -4.73859700 | 1.64997400  | -2.69515500 |
| H | -4.99106100 | 1.77347600  | -1.64874100 |
| C | -0.83781800 | 4.44715300  | -0.74572200 |
| C | -1.48363600 | 5.15528200  | -1.77577100 |
| C | -1.51580900 | 4.34436500  | 0.47890100  |
| C | -2.75193100 | 5.70854800  | -1.60461200 |
| H | -0.99281700 | 5.29548000  | -2.73496800 |
| C | -2.78583400 | 4.89888800  | 0.65617200  |
| H | -1.06013100 | 3.85030000  | 1.32869400  |
| C | -3.41520200 | 5.58041300  | -0.38297600 |
| H | -3.21599400 | 6.24778700  | -2.42656900 |
| H | -3.27791100 | 4.79398800  | 1.61921900  |
| H | -4.40273700 | 6.01171500  | -0.24355300 |
| C | 1.49169200  | 6.08716500  | 0.36749200  |
| C | 2.30870800  | 5.87674700  | 1.40791800  |

|   |             |            |             |
|---|-------------|------------|-------------|
| H | 3.03685400  | 5.07086600 | 1.41239100  |
| H | 2.28556500  | 6.52505400 | 2.28125400  |
| C | 1.06186500  | 1.03199600 | -3.45587600 |
| H | 2.06483200  | 0.96263900 | -3.02907400 |
| H | 0.59096700  | 0.04651100 | -3.48664200 |
| H | 1.18164600  | 1.38006200 | -4.49529100 |
| C | 0.55003500  | 7.26984000 | 0.34588500  |
| H | 0.77793900  | 7.92603300 | -0.50609700 |
| H | -0.49713900 | 6.96926600 | 0.23936900  |
| H | 0.64306300  | 7.86433200 | 1.26051400  |

TS-1-2-5S-2

l imaginary frequency

H = -5315.344363

G = -5315.545578

E(M06-2X-DCM) = -5316.234277

|   |             |             |             |
|---|-------------|-------------|-------------|
| O | -1.58798800 | -1.85277100 | -1.31729900 |
| O | -3.19990000 | -0.34031000 | 0.04720300  |
| P | -1.65082400 | -0.78536800 | -0.10575800 |
| O | -0.93536900 | 0.54042400  | -0.45669000 |
| N | -1.20485800 | -1.53528500 | 1.22844400  |
| S | 0.33681000  | -1.74496600 | 1.60434500  |
| C | 0.47026200  | -3.60405400 | 1.72418000  |
| F | 0.10501700  | -4.16403000 | 0.57036800  |
| F | -0.31601000 | -4.06527800 | 2.70320900  |
| F | 1.73787300  | -3.92673700 | 1.99150700  |
| C | -0.12085300 | 4.45312200  | -0.41855500 |
| C | 0.06276500  | 4.25220300  | 1.13514400  |
| H | -0.71725200 | 4.83539200  | 1.64003100  |
| H | 1.02071400  | 4.71109500  | 1.39753500  |
| C | -0.00001200 | 2.87744500  | 1.75659200  |
| C | 1.03530700  | 3.71170900  | -1.15569200 |
| H | 0.74443200  | 3.52777100  | -2.19464300 |
| H | 1.92535700  | 4.33632300  | -1.15380600 |
| N | 1.47365400  | 2.44971000  | -0.55816400 |
| C | 2.79293600  | 2.23214700  | -0.20142400 |
| N | 3.04464100  | 0.93084500  | 0.13340700  |
| C | 4.24676600  | 0.28892500  | 0.51918800  |
| C | 5.32583000  | 0.91847600  | 1.15599500  |
| C | 4.31315200  | -1.09297600 | 0.28282000  |
| C | 6.44992200  | 0.17239300  | 1.51386600  |
| C | 5.44116300  | -1.82065600 | 0.65404600  |
| H | 3.47274300  | -1.60011400 | -0.17366000 |
| C | 6.52713300  | -1.19689800 | 1.26561600  |

|   |             |             |             |
|---|-------------|-------------|-------------|
| H | 7.40653800  | -1.76273000 | 1.54680500  |
| C | 5.48767700  | -3.28933100 | 0.33076100  |
| C | 7.57114700  | 0.85281300  | 2.25585900  |
| F | 5.77230500  | -3.50235500 | -0.98710800 |
| F | 6.43383600  | -3.94030000 | 1.03784500  |
| F | 4.30649800  | -3.89735600 | 0.56668000  |
| F | 8.75924300  | 0.24511000  | 2.03470800  |
| F | 7.70417900  | 2.14720100  | 1.89943800  |
| F | 7.36525900  | 0.83246000  | 3.59440700  |
| S | 3.92832700  | 3.48085700  | -0.13601200 |
| H | 5.29511900  | 1.97840300  | 1.35662400  |
| C | -1.12333700 | 2.06197000  | 1.69963100  |
| H | 2.26403100  | 0.27291600  | 0.07556800  |
| H | -2.07977000 | 2.50021500  | 1.42021500  |
| H | -1.18213700 | 1.25262800  | 2.42931000  |
| O | 1.25938200  | -1.38707600 | 0.49787600  |
| H | 0.92803400  | 1.62727700  | -0.80880400 |
| O | 0.64646900  | -1.23020600 | 2.94169100  |
| H | -0.92345800 | 1.31514400  | 0.58277000  |
| C | -6.01130700 | -3.28429200 | 1.02259400  |
| C | -5.59045200 | -3.11749500 | -0.29234900 |
| C | -4.71152500 | -2.07807900 | -0.63692600 |
| C | -4.61976900 | -1.39246300 | 1.70969600  |
| C | -5.55161600 | -2.40273900 | 2.00089700  |
| C | -1.99735200 | -1.54578000 | -2.62348600 |
| C | -3.35829200 | -1.48594400 | -2.91515200 |
| C | -3.75614500 | -1.01065700 | -4.17548100 |
| C | -2.81346700 | -0.74747500 | -5.16399500 |
| C | -1.46331600 | -0.97120100 | -4.89298500 |
| C | -1.01614200 | -1.35841300 | -3.61767000 |
| H | -5.89983800 | -2.50092700 | 3.02469600  |
| H | -0.72502100 | -0.83230500 | -5.67676700 |
| C | -4.58555700 | -1.98761300 | -2.15506000 |
| C | -4.89025100 | -3.47711500 | -2.54054300 |
| H | -3.97263600 | -4.06499700 | -2.42288400 |
| H | -5.22098600 | -3.58017600 | -3.57825000 |
| H | -5.70449600 | -1.64961900 | -4.88511600 |
| H | -5.57590100 | 0.09004900  | -4.65479800 |
| C | -4.18244900 | -1.28484500 | 0.37661400  |
| H | -6.69703700 | -4.08454700 | 1.28886700  |
| H | -3.12154300 | -0.39887500 | -6.14649600 |
| C | -5.94118000 | -3.94248300 | -1.51060200 |
| H | -5.89353200 | -5.01972600 | -1.31556500 |
| H | -6.96269700 | -3.72969500 | -1.85559600 |

|   |             |             |             |
|---|-------------|-------------|-------------|
| C | -5.26239400 | -0.87581200 | -4.24250500 |
| C | -5.68477100 | -1.05667100 | -2.76753400 |
| H | -5.65647300 | -0.09031500 | -2.25098900 |
| H | -6.69201100 | -1.46816800 | -2.65146800 |
| C | 0.43543600  | -1.62348800 | -3.37390300 |
| C | 1.39483200  | -0.59631400 | -3.56326600 |
| C | 0.85590100  | -2.93260800 | -3.02105700 |
| C | 1.04944200  | 0.74207800  | -3.94228900 |
| C | 2.79848900  | -0.88646600 | -3.36905400 |
| C | 2.25805300  | -3.19363300 | -2.78906900 |
| C | 2.01015000  | 1.69934400  | -4.14904700 |
| H | 0.00587400  | 0.99955100  | -4.07420000 |
| C | 3.76636900  | 0.14529000  | -3.58013400 |
| C | 3.18925400  | -2.16755700 | -2.97096800 |
| C | 3.39051500  | 1.40292200  | -3.96703600 |
| H | 1.71316600  | 2.70030900  | -4.45100500 |
| H | 4.81466800  | -0.09593900 | -3.42325400 |
| H | 4.24220300  | -2.37146200 | -2.79372000 |
| H | 4.13540700  | 2.17765600  | -4.12223900 |
| C | -4.17899600 | -0.46355700 | 2.79713800  |
| C | -3.44233500 | -0.96078100 | 3.90028400  |
| C | -4.57909300 | 0.89649500  | 2.76075100  |
| C | -2.97544000 | -2.31254700 | 3.97839200  |
| C | -3.11731800 | -0.07691200 | 4.99783500  |
| C | -4.22373400 | 1.77377900  | 3.85388900  |
| C | -2.27449000 | -2.76166100 | 5.06616100  |
| H | -3.15554500 | -2.97775100 | 3.14310600  |
| C | -2.39179000 | -0.58942900 | 6.11874400  |
| C | -3.51198100 | 1.26218600  | 4.94263000  |
| C | -1.98627600 | -1.89499600 | 6.15828500  |
| H | -1.91531700 | -3.78635900 | 5.08863500  |
| H | -2.16435500 | 0.08882300  | 6.93776200  |
| H | -3.26106600 | 1.92328600  | 5.76997600  |
| H | -1.42985600 | -2.27198800 | 7.01187500  |
| C | 0.39881700  | -5.28846200 | -2.55200000 |
| H | -0.30926000 | -6.10975600 | -2.47893500 |
| C | -0.04299800 | -4.04160900 | -2.90935300 |
| H | -1.09428800 | -3.89225000 | -3.12654000 |
| C | 1.77431500  | -5.52381400 | -2.27304900 |
| H | 2.10210800  | -6.51522600 | -1.97302600 |
| C | 2.67720800  | -4.50343500 | -2.39460600 |
| H | 3.73104700  | -4.66292400 | -2.18718200 |
| C | -5.70851900 | 2.78013300  | 1.68131000  |
| H | -6.29288400 | 3.17453400  | 0.85424900  |



|   |             |            |             |
|---|-------------|------------|-------------|
| C | -5.33515600 | 3.64368600 | 2.75050900  |
| H | -5.63249600 | 4.68873700 | 2.72893100  |
| C | -4.61881400 | 3.14781700 | 3.80639300  |
| H | -4.33958000 | 3.79060200 | 4.63822700  |
| C | -5.34834800 | 1.45729500 | 1.68996100  |
| H | -5.65685200 | 0.81502300 | 0.87303200  |
| C | 1.14692900  | 2.47224900 | 2.62786900  |
| H | 1.15666200  | 1.39772200 | 2.83239700  |
| H | 2.11225900  | 2.80501000 | 2.23892200  |
| H | 1.00265000  | 2.98505800 | 3.59285000  |
| C | -0.03557400 | 5.98360200 | -0.65529400 |
| C | -0.93609500 | 6.83635300 | 0.00884100  |
| C | 0.88653300  | 6.58429900 | -1.52587900 |
| C | -0.91258100 | 8.21725100 | -0.17509100 |
| H | -1.68344900 | 6.42244000 | 0.68049500  |
| C | 0.91140600  | 7.96881200 | -1.71749000 |
| H | 1.59747800  | 5.98617900 | -2.08268500 |
| C | 0.01587600  | 8.79445100 | -1.04237600 |
| H | -1.62342100 | 8.84140000 | 0.36016500  |
| H | 1.64137200  | 8.39634800 | -2.39963900 |
| H | 0.03903000  | 9.87072900 | -1.18878200 |
| C | -1.52317500 | 3.93555700 | -0.89996600 |
| H | -1.58888300 | 2.87084300 | -0.68169300 |
| H | -2.29255500 | 4.43114100 | -0.29132600 |
| C | -1.89069000 | 4.09875000 | -2.36892000 |
| C | -1.94830700 | 3.01650500 | -3.15672800 |
| H | -1.71005800 | 2.02416800 | -2.78440500 |
| H | -2.25605200 | 3.08645000 | -4.19771600 |
| C | -2.29557100 | 5.45741900 | -2.89326000 |
| H | -3.05954400 | 5.91369500 | -2.25003700 |
| H | -1.45819300 | 6.16137400 | -2.92433100 |
| H | -2.70760600 | 5.37472800 | -3.90415300 |

TS-1-2-5R

l imaginary frequency

H = -5315.349011

G = -5315.549800

E(M06-2X-DCM) = -5316.240220

|   |             |             |             |
|---|-------------|-------------|-------------|
| O | -1.53665000 | -1.78437500 | -1.33077300 |
| O | -3.12902500 | -0.38554200 | 0.17374800  |
| P | -1.56802500 | -0.72420900 | -0.10684600 |
| O | -0.95863000 | 0.63235000  | -0.50629900 |
| N | -0.98949900 | -1.46393800 | 1.18514000  |
| S | 0.57758300  | -1.67812200 | 1.41030400  |

|   |             |             |             |
|---|-------------|-------------|-------------|
| C | 0.73515700  | -3.53913700 | 1.44223300  |
| F | 0.25848800  | -4.06017400 | 0.31062700  |
| F | 0.05325800  | -4.04659000 | 2.47664200  |
| F | 2.02462700  | -3.86107500 | 1.56927100  |
| C | -0.05830000 | 4.60748400  | -0.34780400 |
| C | 0.10965400  | 4.36130000  | 1.19194800  |
| H | -0.58197300 | 5.03495800  | 1.71900200  |
| H | 1.12296100  | 4.67246600  | 1.46246200  |
| C | -0.13761800 | 2.98638800  | 1.76355600  |
| C | 1.05358400  | 3.81053900  | -1.09956500 |
| H | 0.75684400  | 3.60651200  | -2.12872900 |
| H | 1.93713200  | 4.44396300  | -1.15287100 |
| N | 1.50268600  | 2.56116900  | -0.48501600 |
| C | 2.80472700  | 2.38492700  | -0.05933100 |
| N | 3.10553800  | 1.07907400  | 0.20322600  |
| C | 4.33123000  | 0.46812700  | 0.55921500  |
| C | 5.34732700  | 1.07861200  | 1.30788800  |
| C | 4.49272400  | -0.86495800 | 0.15526200  |
| C | 6.50793100  | 0.36410100  | 1.60769000  |
| C | 5.65784600  | -1.56181300 | 0.46662000  |
| H | 3.69789900  | -1.35837500 | -0.39093200 |
| C | 6.68316600  | -0.95453900 | 1.18814900  |
| H | 7.59286100  | -1.49376300 | 1.42080900  |
| C | 5.79947200  | -2.96948700 | -0.04386100 |
| C | 7.56330400  | 1.00988200  | 2.46780900  |
| F | 5.97697600  | -2.99089100 | -1.39666200 |
| F | 6.85429800  | -3.61171200 | 0.49656100  |
| F | 4.69709700  | -3.70885400 | 0.20341200  |
| F | 8.79646800  | 0.52513000  | 2.19527400  |
| F | 7.60649000  | 2.34791100  | 2.30087700  |
| F | 7.33758400  | 0.78435700  | 3.78406600  |
| S | 3.86753800  | 3.68152600  | 0.15850900  |
| C | 0.27146200  | 6.13617500  | -0.56148700 |
| H | 1.21630900  | 6.32998900  | -0.04187300 |
| H | -0.49703000 | 6.73101200  | -0.05157100 |
| H | 5.23986400  | 2.10077400  | 1.63766800  |
| C | -1.30282500 | 2.25661800  | 1.55517300  |
| H | 2.36618600  | 0.38663400  | 0.05560800  |
| H | -2.18369400 | 2.76473000  | 1.17006100  |
| H | -1.50139900 | 1.45447500  | 2.26842500  |
| O | 1.39631700  | -1.27052200 | 0.23863700  |
| H | 0.98883800  | 1.72396400  | -0.75383300 |
| O | 1.00783100  | -1.22004800 | 2.73431900  |
| H | -1.03589900 | 1.49391300  | 0.49256800  |

|   |             |             |             |
|---|-------------|-------------|-------------|
| C | -5.62214900 | -3.54784000 | 1.32471400  |
| C | -5.32022700 | -3.33835100 | -0.01635700 |
| C | -4.55552100 | -2.23007700 | -0.41499300 |
| C | -4.34156000 | -1.55101700 | 1.92433000  |
| C | -5.16230400 | -2.63596000 | 2.27443700  |
| C | -2.05977800 | -1.48086900 | -2.59377200 |
| C | -3.43878600 | -1.51941900 | -2.78293000 |
| C | -3.96753500 | -1.05701800 | -3.99905500 |
| C | -3.12513100 | -0.70331300 | -5.04861800 |
| C | -1.74438400 | -0.82121800 | -4.88173300 |
| C | -1.17460300 | -1.19280800 | -3.65174200 |
| H | -5.42287400 | -2.76589600 | 3.32056500  |
| H | -1.08044300 | -0.60843900 | -5.71410500 |
| C | -4.55904200 | -2.12138100 | -1.93767800 |
| C | -4.77571400 | -3.62736800 | -2.31720000 |
| H | -3.80813300 | -4.14094300 | -2.27993000 |
| H | -5.17926700 | -3.74963400 | -3.32679900 |
| H | -5.90490000 | -1.84936600 | -4.56847900 |
| H | -5.90517000 | -0.10751800 | -4.32437100 |
| C | -4.01232800 | -1.40202700 | 0.56410500  |
| H | -6.21764800 | -4.40329600 | 1.63310700  |
| H | -3.53218600 | -0.36613700 | -5.99859400 |
| C | -5.70083700 | -4.18108300 | -1.21332900 |
| H | -5.55285800 | -5.25229800 | -1.03620100 |
| H | -6.76032500 | -4.04831800 | -1.47365500 |
| C | -5.48078300 | -1.04628000 | -3.95015300 |
| C | -5.77228500 | -1.27510900 | -2.45012200 |
| H | -5.78011600 | -0.31486400 | -1.92131600 |
| H | -6.73214700 | -1.76649400 | -2.26433300 |
| C | 0.30739400  | -1.32734900 | -3.50609100 |
| C | 1.15385400  | -0.20869100 | -3.71026600 |
| C | 0.86735900  | -2.59800200 | -3.21346900 |
| C | 0.66557200  | 1.09389200  | -4.05774500 |
| C | 2.58575200  | -0.36336200 | -3.57297500 |
| C | 2.29641000  | -2.72754300 | -3.04534000 |
| C | 1.52029400  | 2.14191900  | -4.29084900 |
| H | -0.40350400 | 1.24416200  | -4.15409700 |
| C | 3.43908100  | 0.76256600  | -3.79786600 |
| C | 3.11508800  | -1.60893100 | -3.22428700 |
| C | 2.92864600  | 1.98063200  | -4.15632500 |
| H | 1.11977600  | 3.11080100  | -4.57832700 |
| H | 4.51104500  | 0.62445000  | -3.68104600 |
| H | 4.18964500  | -1.71424800 | -3.09331800 |
| H | 3.58851000  | 2.82555700  | -4.32949700 |

|   |             |             |             |
|---|-------------|-------------|-------------|
| C | -3.91573300 | -0.58743100 | 2.98813200  |
| C | -3.04340400 | -1.00707200 | 4.02187500  |
| C | -4.47610400 | 0.71512700  | 3.01103100  |
| C | -2.42488700 | -2.29860300 | 4.04017400  |
| C | -2.73555800 | -0.10166700 | 5.10695800  |
| C | -4.14355200 | 1.61538300  | 4.09261000  |
| C | -1.59178300 | -2.67380900 | 5.06051100  |
| H | -2.59582300 | -2.97232400 | 3.20995900  |
| C | -1.86796300 | -0.53751500 | 6.15723300  |
| C | -3.28881200 | 1.18136300  | 5.10998500  |
| C | -1.31510000 | -1.78844700 | 6.14064700  |
| H | -1.11756200 | -3.65037100 | 5.03552000  |
| H | -1.65459600 | 0.15445900  | 6.96862200  |
| H | -3.05363400 | 1.85807000  | 5.92940200  |
| H | -0.65193600 | -2.10663200 | 6.94025100  |
| C | 0.65757400  | -4.99994900 | -2.81093800 |
| H | 0.03531700  | -5.88804500 | -2.73850800 |
| C | 0.08335000  | -3.79085800 | -3.10378000 |
| H | -0.98616700 | -3.73545900 | -3.27107800 |
| C | 2.06019500  | -5.10920900 | -2.59722000 |
| H | 2.49435900  | -6.07329600 | -2.34755600 |
| C | 2.85563000  | -4.00259800 | -2.71646900 |
| H | 3.92769300  | -4.06734900 | -2.55749200 |
| C | -5.91512800 | 2.45542500  | 2.07012400  |
| H | -6.60824900 | 2.78494100  | 1.30075300  |
| C | -5.56857800 | 3.34321900  | 3.12801400  |
| H | -5.99603400 | 4.34197000  | 3.15641100  |
| C | -4.71010500 | 2.92860800  | 4.11001200  |
| H | -4.44615800 | 3.59015000  | 4.93208200  |
| C | -5.39144900 | 1.18981500  | 2.01655700  |
| H | -5.67925000 | 0.52604800  | 1.20928900  |
| C | -1.49969200 | 4.31845300  | -0.81143800 |
| C | -2.56577700 | 5.04597900  | -0.24877500 |
| C | -1.81952300 | 3.36506200  | -1.78651900 |
| C | -3.88422500 | 4.83711000  | -0.64627500 |
| H | -2.37068800 | 5.79075000  | 0.51845100  |
| C | -3.14113900 | 3.15101200  | -2.19014300 |
| H | -1.04752800 | 2.75122000  | -2.23308200 |
| C | -4.17980700 | 3.88769100  | -1.62731900 |
| H | -4.68095100 | 5.41664800  | -0.18762100 |
| H | -3.34955600 | 2.39318700  | -2.94072500 |
| H | -5.20701600 | 3.72268800  | -1.94076500 |
| C | 0.40750800  | 6.63193200  | -1.99189400 |
| C | 1.61580600  | 6.91315000  | -2.49580500 |

|   |             |            |             |
|---|-------------|------------|-------------|
| H | 2.52763600  | 6.77427400 | -1.92023400 |
| H | 1.73490500  | 7.29763400 | -3.50614900 |
| C | -0.84820000 | 6.86483800 | -2.79974800 |
| H | -1.39168400 | 5.93409000 | -2.99521400 |
| H | -1.54505000 | 7.52182900 | -2.26224800 |
| H | -0.61367500 | 7.33221300 | -3.76135800 |
| C | 0.88744700  | 2.46653500 | 2.72147900  |
| H | 0.80604400  | 1.38771500 | 2.88396700  |
| H | 1.90585700  | 2.73445800 | 2.42869600  |
| H | 0.69858100  | 2.95852600 | 3.68957800  |

TS-1-2-5R-1

l imaginary frequency

H = -5315.347029

G = -5315.548520

E(M06-2X-DCM) = -5316.239617

|   |             |             |             |
|---|-------------|-------------|-------------|
| O | -1.50926900 | -1.77920700 | -1.33212300 |
| O | -3.09569800 | -0.39386500 | 0.19270600  |
| P | -1.53539900 | -0.72950700 | -0.09861500 |
| O | -0.92679300 | 0.62990900  | -0.48818800 |
| N | -0.95247300 | -1.48159300 | 1.18406300  |
| S | 0.61663300  | -1.69154300 | 1.40230600  |
| C | 0.77231000  | -3.55231400 | 1.44770400  |
| F | 0.29767600  | -4.08075600 | 0.31847300  |
| F | 0.08752500  | -4.05289800 | 2.48397300  |
| F | 2.06093400  | -3.87522400 | 1.57981200  |
| C | -0.13837500 | 4.62016000  | -0.34371900 |
| C | 0.01679100  | 4.39848800  | 1.20149100  |
| H | -0.72363000 | 5.03146600  | 1.71128200  |
| H | 1.00443500  | 4.77390200  | 1.48624500  |
| C | -0.15365000 | 3.01200700  | 1.77449700  |
| C | 1.04349200  | 3.90031500  | -1.05582900 |
| H | 0.83353200  | 3.77772200  | -2.12069600 |
| H | 1.91619500  | 4.54615000  | -0.97311900 |
| N | 1.47596500  | 2.62225600  | -0.49401000 |
| C | 2.78059200  | 2.41288600  | -0.08840800 |
| N | 3.05701100  | 1.10191100  | 0.16905300  |
| C | 4.27758500  | 0.48592300  | 0.54041500  |
| C | 5.23830000  | 1.06877700  | 1.37845900  |
| C | 4.48512200  | -0.81674700 | 0.06988900  |
| C | 6.39550300  | 0.35951000  | 1.69984500  |
| C | 5.64475300  | -1.51272900 | 0.40739300  |
| H | 3.73060400  | -1.28898400 | -0.54733000 |
| C | 6.61715700  | -0.93061200 | 1.21637200  |

|   |             |             |             |
|---|-------------|-------------|-------------|
| H | 7.52317900  | -1.46759200 | 1.46791400  |
| C | 5.83170300  | -2.89378100 | -0.15794300 |
| C | 7.39203700  | 0.96961200  | 2.65097500  |
| F | 6.00005000  | -2.85842100 | -1.51133900 |
| F | 6.91054000  | -3.52044300 | 0.35243200  |
| F | 4.75629500  | -3.67879500 | 0.06755200  |
| F | 8.65039800  | 0.54236000  | 2.39804600  |
| F | 7.39901800  | 2.31710800  | 2.58527200  |
| F | 7.11934000  | 0.63929600  | 3.93590100  |
| S | 3.88487800  | 3.67804300  | 0.11231900  |
| C | 0.06999900  | 6.16664000  | -0.57792600 |
| H | 0.97990900  | 6.45784300  | -0.03844800 |
| H | -0.75881400 | 6.69653300  | -0.09767000 |
| H | 5.09118500  | 2.06667700  | 1.76293900  |
| C | -1.29096000 | 2.23368100  | 1.58640100  |
| H | 2.31348100  | 0.41471000  | 0.01729000  |
| H | -2.19998300 | 2.70632900  | 1.22136700  |
| H | -1.44087400 | 1.42163400  | 2.30048800  |
| O | 1.42831600  | -1.29413600 | 0.22317900  |
| H | 0.94249500  | 1.80078200  | -0.77360000 |
| O | 1.05402200  | -1.22214100 | 2.72021100  |
| H | -1.01792500 | 1.48945800  | 0.51770400  |
| C | -5.55694800 | -3.57172600 | 1.36948200  |
| C | -5.26746500 | -3.36231300 | 0.02567800  |
| C | -4.51539200 | -2.24834400 | -0.38095200 |
| C | -4.28998400 | -1.56191100 | 1.95475700  |
| C | -5.09857400 | -2.65314500 | 2.31346400  |
| C | -2.04970700 | -1.47551800 | -2.58733200 |
| C | -3.43046400 | -1.52753300 | -2.76104500 |
| C | -3.97787700 | -1.06916700 | -3.97040800 |
| C | -3.15159500 | -0.70520800 | -5.02918900 |
| C | -1.76792900 | -0.80850300 | -4.87796800 |
| C | -1.18016500 | -1.17615600 | -3.65521200 |
| H | -5.35081300 | -2.78240100 | 3.36172500  |
| H | -1.11576300 | -0.58743600 | -5.71745500 |
| C | -4.53529100 | -2.14052300 | -1.90344200 |
| C | -4.74222500 | -3.64842800 | -2.28030300 |
| H | -3.76971900 | -4.15324300 | -2.25277500 |
| H | -5.15498200 | -3.77475400 | -3.28568100 |
| H | -5.91338200 | -1.88083700 | -4.51823300 |
| H | -5.92818400 | -0.13901600 | -4.27380200 |
| C | -3.97080500 | -1.41397500 | 0.59196300  |
| H | -6.14239000 | -4.43174400 | 1.68437600  |
| H | -3.57307400 | -0.37156000 | -5.97411000 |

|   |             |             |             |
|---|-------------|-------------|-------------|
| C | -5.65112900 | -4.20999600 | -1.16687100 |
| H | -5.49082700 | -5.27950400 | -0.99010200 |
| H | -6.71434500 | -4.08806800 | -1.41707700 |
| C | -5.49038000 | -1.07357500 | -3.90457200 |
| C | -5.76220400 | -1.30533900 | -2.40152600 |
| H | -5.77204700 | -0.34518600 | -1.87260100 |
| H | -6.71531800 | -1.80535300 | -2.20440200 |
| C | 0.30521600  | -1.29458000 | -3.53089600 |
| C | 1.13550900  | -0.16587900 | -3.74668300 |
| C | 0.88442700  | -2.55933900 | -3.25094000 |
| C | 0.62619800  | 1.13226500  | -4.07922800 |
| C | 2.57123300  | -0.30450800 | -3.63708700 |
| C | 2.31818000  | -2.67405600 | -3.11396800 |
| C | 1.46348600  | 2.19284100  | -4.31893100 |
| H | -0.44583900 | 1.26928200  | -4.15856500 |
| C | 3.40702700  | 0.83277500  | -3.87052700 |
| C | 3.12104300  | -1.54614200 | -3.30636000 |
| C | 2.87585400  | 2.04732400  | -4.21069400 |
| H | 1.04423000  | 3.15726900  | -4.59481200 |
| H | 4.48252400  | 0.70661500  | -3.77465900 |
| H | 4.19918800  | -1.64032000 | -3.19878600 |
| H | 3.52332600  | 2.90044600  | -4.39083600 |
| C | -3.86885800 | -0.59024000 | 3.01322400  |
| C | -2.98479700 | -0.99568300 | 4.04261700  |
| C | -4.44776100 | 0.70424000  | 3.03756900  |
| C | -2.35007300 | -2.27931200 | 4.06059300  |
| C | -2.68232300 | -0.08355700 | 5.12370600  |
| C | -4.12134700 | 1.61117600  | 4.11544800  |
| C | -1.50594000 | -2.64101300 | 5.07670700  |
| H | -2.51743800 | -2.95721900 | 3.23314900  |
| C | -1.80255600 | -0.50538700 | 6.16958900  |
| C | -3.25335500 | 1.19165400  | 5.12767800  |
| C | -1.23379400 | -1.74917700 | 6.15266200  |
| H | -1.01917400 | -3.61132100 | 5.05103700  |
| H | -1.59328900 | 0.19129600  | 6.97802000  |
| H | -3.02266600 | 1.87319300  | 5.94437500  |
| H | -0.56160600 | -2.05670800 | 6.94889900  |
| C | 0.70829400  | -4.96332300 | -2.84483000 |
| H | 0.09684400  | -5.85759900 | -2.75808900 |
| C | 0.11535300  | -3.76022600 | -3.12456700 |
| H | -0.95812300 | -3.71580500 | -3.26757100 |
| C | 2.11658300  | -5.05858400 | -2.66427100 |
| H | 2.56616200  | -6.01839000 | -2.42569500 |
| C | 2.89778400  | -3.94392600 | -2.80071700 |

|   |             |             |             |
|---|-------------|-------------|-------------|
| H | 3.97375800  | -3.99803300 | -2.66671400 |
| C | -5.92137800 | 2.42027200  | 2.10550200  |
| H | -6.62645400 | 2.73712300  | 1.34165100  |
| C | -5.58117500 | 3.31484800  | 3.15977100  |
| H | -6.02502400 | 4.30637100  | 3.19084200  |
| C | -4.70822600 | 2.91540300  | 4.13534700  |
| H | -4.44877500 | 3.58207700  | 4.95471300  |
| C | -5.37738200 | 1.16329700  | 2.04904200  |
| H | -5.66022700 | 0.49415700  | 1.24448600  |
| C | -1.54306100 | 4.23297200  | -0.84227200 |
| C | -2.67464100 | 4.84933700  | -0.27440100 |
| C | -1.76442500 | 3.31155800  | -1.87111900 |
| C | -3.96359900 | 4.55892100  | -0.71457300 |
| H | -2.55545200 | 5.57190400  | 0.52909500  |
| C | -3.05584100 | 3.01428100  | -2.31767100 |
| H | -0.93452500 | 2.79118400  | -2.33222200 |
| C | -4.16117700 | 3.63738600  | -1.74618900 |
| H | -4.81317800 | 5.05173200  | -0.24965800 |
| H | -3.18845600 | 2.28356700  | -3.11114100 |
| H | -5.16512800 | 3.40824200  | -2.09308200 |
| C | 0.18692200  | 6.63358400  | -2.02623300 |
| C | -0.88893500 | 6.80590300  | -2.80307400 |
| H | -1.89716200 | 6.61004800  | -2.45119300 |
| H | -0.79268500 | 7.15441800  | -3.82873300 |
| C | 1.57408700  | 6.96472200  | -2.52853100 |
| H | 2.02826100  | 7.75720100  | -1.91782200 |
| H | 2.25562600  | 6.10725100  | -2.47259600 |
| H | 1.54965700  | 7.31165200  | -3.56633300 |
| C | 0.91267300  | 2.53311300  | 2.70789200  |
| H | 0.88153700  | 1.45061300  | 2.86399400  |
| H | 1.91200800  | 2.84832900  | 2.39655100  |
| H | 0.72110300  | 3.00960600  | 3.68322000  |

TS-1-2-5R-2

l imaginary frequency

H = -5315.342521

G = -5315.543724

E(M06-2X-DCM) = -5316.233061

|   |             |             |             |
|---|-------------|-------------|-------------|
| O | -1.53212300 | -1.97684600 | -1.28070600 |
| O | -3.15086600 | -0.48499200 | 0.09370600  |
| P | -1.59100600 | -0.87999900 | -0.09587400 |
| O | -0.93003800 | 0.45757900  | -0.49999700 |
| N | -1.08203400 | -1.58337700 | 1.24155800  |
| S | 0.47416700  | -1.72121800 | 1.58813500  |



|   |             |             |             |
|---|-------------|-------------|-------------|
| C | 0.68625500  | -3.57088400 | 1.73638500  |
| F | 0.32174200  | -4.16616100 | 0.59993700  |
| F | -0.06188100 | -4.04586200 | 2.73886900  |
| F | 1.97072800  | -3.83804000 | 1.98375200  |
| C | -0.30358800 | 4.41470400  | -0.51265300 |
| C | -0.12490300 | 4.25937600  | 1.04636600  |
| H | -0.94712600 | 4.80232400  | 1.52877200  |
| H | 0.79853300  | 4.78323200  | 1.31166000  |
| C | -0.10529900 | 2.89055100  | 1.68427800  |
| C | 0.94399700  | 3.77834100  | -1.19505500 |
| H | 0.75567100  | 3.61820100  | -2.25995300 |
| H | 1.79005200  | 4.45635900  | -1.10388200 |
| N | 1.41666400  | 2.52391500  | -0.60813200 |
| C | 2.74344700  | 2.33964800  | -0.25670400 |
| N | 3.02732100  | 1.04764500  | 0.08523600  |
| C | 4.25111700  | 0.44753200  | 0.47260200  |
| C | 5.28027200  | 1.10631500  | 1.16033100  |
| C | 4.39070800  | -0.91864100 | 0.18938700  |
| C | 6.43178800  | 0.40509800  | 1.51957400  |
| C | 5.54480800  | -1.60350300 | 0.56451100  |
| H | 3.58699600  | -1.44832600 | -0.30632100 |
| C | 6.58291100  | -0.94924000 | 1.22410900  |
| H | 7.48312200  | -1.48073900 | 1.50645300  |
| C | 5.66504500  | -3.05759700 | 0.19806400  |
| C | 7.50101500  | 1.10936800  | 2.31411700  |
| F | 5.91311500  | -3.21824200 | -1.13442000 |
| F | 6.67018900  | -3.67202500 | 0.85401200  |
| F | 4.52868500  | -3.73836700 | 0.45628900  |
| F | 8.72637100  | 0.58898600  | 2.07414300  |
| F | 7.55709500  | 2.42782500  | 2.03437900  |
| F | 7.28411500  | 0.99810400  | 3.64643800  |
| S | 3.85338700  | 3.61118700  | -0.20843700 |
| H | 5.18989700  | 2.15472600  | 1.39994400  |
| C | -1.17491500 | 2.00605500  | 1.62668500  |
| H | 2.26761100  | 0.36484200  | 0.03223500  |
| H | -2.15520200 | 2.38032400  | 1.33912100  |
| H | -1.18742100 | 1.20283900  | 2.36516100  |
| O | 1.35960200  | -1.34459700 | 0.45786000  |
| H | 0.89707600  | 1.68658900  | -0.86487400 |
| O | 0.78868500  | -1.17180600 | 2.91051600  |
| H | -0.94264500 | 1.26221400  | 0.52193100  |
| C | -5.80301400 | -3.50305300 | 1.27125200  |
| C | -5.43392100 | -3.36833500 | -0.06271500 |
| C | -4.61393400 | -2.30583900 | -0.47565700 |

|   |             |             |             |
|---|-------------|-------------|-------------|
| C | -4.47381500 | -1.52878800 | 1.83941100  |
| C | -5.35089100 | -2.56551400 | 2.19963200  |
| C | -2.00288600 | -1.71938300 | -2.57640900 |
| C | -3.37375900 | -1.73513300 | -2.82081500 |
| C | -3.83771800 | -1.31652500 | -4.07872800 |
| C | -2.94416500 | -1.03183800 | -5.10597300 |
| C | -1.57544200 | -1.17340700 | -4.87557400 |
| C | -1.06778700 | -1.50227800 | -3.60701600 |
| H | -5.66063900 | -2.63892100 | 3.23777100  |
| H | -0.87140200 | -1.01297700 | -5.68645400 |
| C | -4.54727300 | -2.26661100 | -1.99978800 |
| C | -4.79625600 | -3.78117200 | -2.32078500 |
| H | -3.84901900 | -4.32268100 | -2.21615100 |
| H | -5.15842700 | -3.93738500 | -3.34126200 |
| H | -5.77464400 | -2.07457400 | -4.69614800 |
| H | -5.72629000 | -0.32378900 | -4.52737600 |
| C | -4.08466300 | -1.45368000 | 0.48919200  |
| H | -6.44327000 | -4.32140000 | 1.59048300  |
| H | -3.30320300 | -0.72602700 | -6.08539800 |
| C | -5.78800900 | -4.25389400 | -1.23678900 |
| H | -5.68335300 | -5.31962200 | -1.00430300 |
| H | -6.82972800 | -4.10113400 | -1.55177200 |
| C | -5.35018400 | -1.25826800 | -4.09558100 |
| C | -5.71113000 | -1.40944700 | -2.60119300 |
| H | -5.71140500 | -0.42596100 | -2.11718700 |
| H | -6.69266800 | -1.86362800 | -2.43501800 |
| C | 0.40318500  | -1.67170700 | -3.39943900 |
| C | 1.28744700  | -0.58621300 | -3.62070600 |
| C | 0.91626400  | -2.94577400 | -3.04256400 |
| C | 0.84434500  | 0.72089700  | -4.00780200 |
| C | 2.71128400  | -0.78113900 | -3.45755700 |
| C | 2.33760400  | -3.11266400 | -2.84379800 |
| C | 1.73517600  | 1.73456500  | -4.25540200 |
| H | -0.21906000 | 0.90143300  | -4.11658100 |
| C | 3.60342000  | 0.30929600  | -3.70429900 |
| C | 3.19492900  | -2.02979000 | -3.05802000 |
| C | 3.13619100  | 1.53253600  | -4.10145100 |
| H | 1.36886200  | 2.70764100  | -4.57228500 |
| H | 4.66876800  | 0.14080700  | -3.56888100 |
| H | 4.26321100  | -2.16325400 | -2.90691700 |
| H | 3.82441700  | 2.35162500  | -4.28750500 |
| C | -4.04106700 | -0.54165500 | 2.87776500  |
| C | -3.24859400 | -0.96550800 | 3.97283000  |
| C | -4.50511800 | 0.79673500  | 2.80832400  |

|   |             |             |             |
|---|-------------|-------------|-------------|
| C | -2.71371400 | -2.28993800 | 4.07906100  |
| C | -2.93430700 | -0.03051800 | 5.03051000  |
| C | -4.16065800 | 1.72635300  | 3.86103500  |
| C | -1.95783100 | -2.66762400 | 5.15706600  |
| H | -2.88533400 | -2.99011500 | 3.27107300  |
| C | -2.15102800 | -0.46980400 | 6.14367700  |
| C | -3.39496500 | 1.28569000  | 4.94426000  |
| C | -1.68010300 | -1.75206200 | 6.21139600  |
| H | -1.54643100 | -3.67182500 | 5.19970600  |
| H | -1.93289000 | 0.24546500  | 6.93321200  |
| H | -3.15258600 | 1.98552600  | 5.74176800  |
| H | -1.07973400 | -2.07286500 | 7.05814400  |
| C | 0.62275400  | -5.31886100 | -2.53389500 |
| H | -0.02909100 | -6.18239200 | -2.43098700 |
| C | 0.09273400  | -4.10751300 | -2.89330500 |
| H | -0.97154100 | -4.02690300 | -3.08191100 |
| C | 2.01773700  | -5.46259300 | -2.29177100 |
| H | 2.41634800  | -6.42740300 | -1.99080400 |
| C | 2.85022200  | -4.38852500 | -2.44865900 |
| H | 3.91713600  | -4.47879000 | -2.26891400 |
| C | -5.74787600 | 2.58982200  | 1.69925600  |
| H | -6.37219500 | 2.92860600  | 0.87669400  |
| C | -5.38608700 | 3.50548000  | 2.72844200  |
| H | -5.73173300 | 4.53469700  | 2.68104400  |
| C | -4.61985900 | 3.07867300  | 3.77953300  |
| H | -4.34814100 | 3.76164100  | 4.58128500  |
| C | -5.32782900 | 1.28524000  | 1.74188700  |
| H | -5.62840700 | 0.60198600  | 0.95584600  |
| C | 1.05951200  | 2.56650100  | 2.56536000  |
| H | 1.13387000  | 1.49718300  | 2.78348100  |
| H | 2.00475900  | 2.95212000  | 2.17541200  |
| H | 0.88000500  | 3.08183600  | 3.52311900  |
| C | -0.36174500 | 5.93964600  | -0.77812200 |
| C | 0.56530500  | 6.62835300  | -1.57384200 |
| C | -1.40145900 | 6.69395700  | -0.20496300 |
| C | 0.46568900  | 8.00861400  | -1.77585300 |
| H | 1.38516900  | 6.10674200  | -2.05335200 |
| C | -1.50151800 | 8.06920200  | -0.39820300 |
| H | -2.15795100 | 6.20106800  | 0.39952100  |
| C | -0.56312700 | 8.73773000  | -1.18665300 |
| H | 1.20519100  | 8.50847500  | -2.39574000 |
| H | -2.31738800 | 8.61794000  | 0.06498400  |
| H | -0.63669600 | 9.81089400  | -1.33969000 |
| C | -1.64681800 | 3.75592000  | -1.00199600 |

|   |             |            |             |
|---|-------------|------------|-------------|
| H | -2.39968300 | 3.88154100 | -0.21763600 |
| H | -1.48720200 | 2.67632800 | -1.10290000 |
| C | -2.27229900 | 4.25910400 | -2.29377600 |
| C | -3.52714900 | 4.72230300 | -2.29413000 |
| H | -4.01752000 | 5.04003200 | -3.21103900 |
| H | -4.11250400 | 4.80081400 | -1.38124000 |
| C | -1.49215400 | 4.15307100 | -3.58128000 |
| H | -0.62962400 | 4.83108100 | -3.58704500 |
| H | -1.10761700 | 3.13585800 | -3.73115000 |
| H | -2.11770300 | 4.40971500 | -4.44170900 |

TS-1-2-5R-3

l imaginary frequency

H = -5315.340901

G = -5315.542095

E(M06-2X-DCM) = -5316.235380

|   |             |             |             |
|---|-------------|-------------|-------------|
| O | -2.13908800 | 0.01313400  | 1.91724300  |
| O | -3.31562700 | -1.13546900 | -0.09930300 |
| P | -2.00566400 | -0.27928900 | 0.33096800  |
| O | -2.00180200 | 1.11749000  | -0.29872600 |
| N | -0.70778700 | -1.19893700 | 0.11658700  |
| S | -0.29582700 | -1.96881400 | -1.21855000 |
| C | -0.81354000 | -3.74095000 | -0.91163600 |
| F | -0.51237700 | -4.47344300 | -1.98485200 |
| F | -0.16821700 | -4.23818700 | 0.14990900  |
| F | -2.12876500 | -3.80274900 | -0.68832200 |
| C | 0.83752800  | 3.83956900  | -0.67086100 |
| C | 1.06005000  | 3.30183400  | -2.12984800 |
| H | 0.71891000  | 4.08473400  | -2.82168900 |
| H | 2.13748300  | 3.19197400  | -2.27375500 |
| C | 0.38671100  | 2.04162200  | -2.60867600 |
| C | 1.08257600  | 2.66511400  | 0.36130800  |
| H | 0.12157600  | 2.35944000  | 0.77508600  |
| H | 1.71185300  | 3.01151400  | 1.18126600  |
| N | 1.66423300  | 1.43038700  | -0.17534200 |
| C | 3.02202700  | 1.20297800  | -0.27832500 |
| N | 3.29496100  | -0.08947800 | -0.65013500 |
| C | 4.50773500  | -0.78131400 | -0.83627600 |
| C | 5.76906100  | -0.18826600 | -0.99437300 |
| C | 4.40482300  | -2.18155300 | -0.89634500 |
| C | 6.89312700  | -0.99632200 | -1.17697700 |
| C | 5.54000300  | -2.96727600 | -1.06771600 |
| H | 3.43215800  | -2.65177600 | -0.80202800 |
| C | 6.80024800  | -2.38644500 | -1.20660200 |

|   |             |             |             |
|---|-------------|-------------|-------------|
| H | 7.68149400  | -2.99973000 | -1.34608700 |
| C | 5.38627900  | -4.46274000 | -1.01455200 |
| C | 8.24620700  | -0.34140000 | -1.28499200 |
| F | 5.18944800  | -4.89030400 | 0.26269000  |
| F | 6.47568500  | -5.10820100 | -1.47958800 |
| F | 4.32217800  | -4.88880500 | -1.72741700 |
| F | 9.12089300  | -1.10781600 | -1.97576200 |
| F | 8.79291300  | -0.12531600 | -0.06575600 |
| F | 8.18056600  | 0.85655100  | -1.90388900 |
| S | 4.14161100  | 2.42541200  | -0.01897800 |
| H | 5.86774800  | 0.88678700  | -0.97299200 |
| C | -0.98930400 | 1.83832300  | -2.59988600 |
| H | 2.48398800  | -0.70375600 | -0.75524200 |
| H | -1.63732000 | 2.71195500  | -2.54567600 |
| H | -1.36468700 | 1.02342100  | -3.21801100 |
| O | 1.17835500  | -2.03536100 | -1.28926400 |
| H | 1.08367600  | 0.60494300  | -0.04064000 |
| O | -1.01599100 | -1.55197400 | -2.43213000 |
| H | -1.35258900 | 1.37392900  | -1.39916900 |
| C | -7.07749400 | 0.64683300  | 0.42587000  |
| C | -6.42361800 | 0.04127600  | 1.49306200  |
| C | -5.20477100 | -0.62685300 | 1.29781500  |
| C | -5.24195100 | 0.00186300  | -1.06306800 |
| C | -6.50041000 | 0.58984400  | -0.84139500 |
| C | -2.20444500 | -1.06113100 | 2.82586300  |
| C | -3.41186600 | -1.73867300 | 2.99291200  |
| C | -3.43401200 | -2.90492500 | 3.77563700  |
| C | -2.30423900 | -3.31374300 | 4.47422000  |
| C | -1.14484900 | -2.54608200 | 4.39137700  |
| C | -1.05586900 | -1.41630800 | 3.55896700  |
| H | -7.01611700 | 1.03024400  | -1.68921400 |
| H | -0.26716500 | -2.82911900 | 4.96397500  |
| C | -4.83508300 | -1.39748900 | 2.55907600  |
| C | -5.55245700 | -0.51847200 | 3.63957600  |
| H | -5.74120200 | -1.06819200 | 4.56645900  |
| H | -4.90904300 | 0.33495900  | 3.88286600  |
| H | -4.72371100 | -4.64784200 | 3.55066500  |
| H | -5.34742100 | -3.42627200 | 4.65359000  |
| C | -4.59658500 | -0.57588000 | 0.04635600  |
| H | -8.02969300 | 1.15099000  | 0.56976000  |
| H | -2.32361400 | -4.21021500 | 5.08860400  |
| C | -6.83902800 | -0.02142800 | 2.94634500  |
| H | -7.67126400 | -0.72386300 | 3.09283100  |
| H | -7.17702900 | 0.94896400  | 3.32721600  |

|   |             |             |             |
|---|-------------|-------------|-------------|
| C | -4.79294200 | -3.56663200 | 3.71527700  |
| C | -5.47126200 | -2.82821100 | 2.54294300  |
| H | -6.56261600 | -2.80048800 | 2.61670600  |
| H | -5.21207700 | -3.31730700 | 1.59687000  |
| C | 0.22356100  | -0.64125300 | 3.55229400  |
| C | 0.25970900  | 0.66319400  | 4.10759500  |
| C | 1.42318600  | -1.27102300 | 3.13497000  |
| C | -0.89940700 | 1.32546300  | 4.62746000  |
| C | 1.52356800  | 1.35857600  | 4.20996100  |
| C | 2.68397300  | -0.58075500 | 3.29093600  |
| C | -0.82324600 | 2.57925700  | 5.17631800  |
| H | -1.85416700 | 0.81300700  | 4.59893600  |
| C | 1.55680100  | 2.67478000  | 4.77049300  |
| C | 2.69776500  | 0.71963000  | 3.80217900  |
| C | 0.41903500  | 3.27263900  | 5.24184000  |
| H | -1.71976800 | 3.05082700  | 5.56993700  |
| H | 2.51675500  | 3.18222200  | 4.82912200  |
| H | 3.64744200  | 1.24067500  | 3.89967000  |
| H | 0.45929400  | 4.26772000  | 5.67640700  |
| C | -4.68222900 | -0.00125500 | -2.44897600 |
| C | -4.49605700 | -1.22486200 | -3.14012400 |
| C | -4.43645100 | 1.23233800  | -3.10454400 |
| C | -4.76859900 | -2.50210200 | -2.55407400 |
| C | -4.04096100 | -1.20618500 | -4.51180100 |
| C | -4.02064600 | 1.23428000  | -4.48952600 |
| C | -4.56961600 | -3.66509500 | -3.25028800 |
| H | -5.14543100 | -2.54604400 | -1.53913500 |
| C | -3.84225500 | -2.44238300 | -5.20205500 |
| C | -3.82668100 | 0.01815300  | -5.15009300 |
| C | -4.09211100 | -3.64032800 | -4.59100400 |
| H | -4.78117700 | -4.61972100 | -2.77633500 |
| H | -3.48873000 | -2.40584400 | -6.22963600 |
| H | -3.50552200 | 0.02446400  | -6.18980500 |
| H | -3.93547800 | -4.57359700 | -5.12465800 |
| C | 2.63929800  | -3.18503100 | 2.22371000  |
| H | 2.63648200  | -4.17555300 | 1.77719700  |
| C | 1.45442100  | -2.58188100 | 2.55698400  |
| H | 0.51940800  | -3.09164700 | 2.36335400  |
| C | 3.88195500  | -2.52097900 | 2.43182100  |
| H | 4.80521700  | -3.02292200 | 2.16115600  |
| C | 3.89777200  | -1.24800300 | 2.93356500  |
| H | 4.83549600  | -0.71498500 | 3.06852500  |
| C | -4.34386100 | 3.67874400  | -3.12517800 |
| H | -4.44884300 | 4.62577500  | -2.60246800 |

|   |             |            |             |
|---|-------------|------------|-------------|
| C | -3.97260000 | 3.67315900 | -4.50060500 |
| H | -3.81258100 | 4.61408100 | -5.02007800 |
| C | -3.80803300 | 2.48255600 | -5.15568200 |
| H | -3.51003500 | 2.46132000 | -6.20142500 |
| C | -4.56257100 | 2.50337600 | -2.45242400 |
| H | -4.82267500 | 2.52892900 | -1.40090700 |
| C | 1.25241400  | 1.03958400 | -3.30687800 |
| H | 2.24368100  | 0.94373500 | -2.86141300 |
| H | 0.76983200  | 0.06239800 | -3.38356400 |
| H | 1.39768000  | 1.41575700 | -4.33295400 |
| C | 1.78563300  | 5.04008200 | -0.43861000 |
| C | 2.05622200  | 5.48868900 | 0.86505500  |
| C | 2.33006400  | 5.78849200 | -1.49291000 |
| C | 2.85356300  | 6.60568200 | 1.10408700  |
| H | 1.64335900  | 4.96536300 | 1.72063200  |
| C | 3.12812900  | 6.91096900 | -1.25996700 |
| H | 2.15632700  | 5.50412400 | -2.52472800 |
| C | 3.39955100  | 7.32513400 | 0.04123600  |
| H | 3.04603700  | 6.91342900 | 2.12861200  |
| H | 3.54044600  | 7.45545400 | -2.10561800 |
| H | 4.02467500  | 8.19460200 | 0.22556700  |
| C | -0.64393100 | 4.37989900 | -0.55400200 |
| H | -0.80286900 | 5.03453100 | -1.41871900 |
| H | -1.32351900 | 3.52949300 | -0.65864900 |
| C | -1.07789100 | 5.14236300 | 0.68562500  |
| C | -1.29937600 | 6.46030800 | 0.62742500  |
| H | -1.11565100 | 7.03473400 | -0.27702200 |
| H | -1.66106900 | 7.01658400 | 1.48902100  |
| C | -1.34737400 | 4.36008000 | 1.94898200  |
| H | -1.98474300 | 3.48881200 | 1.75119900  |
| H | -0.42859000 | 3.97336400 | 2.40602000  |
| H | -1.84197200 | 4.98467600 | 2.69965200  |

TS-1-2-5R-4

l imaginary frequency

H = -5315.341709

G = -5315.543591

E(M06-2X-DCM) = -5316.235221

|   |             |             |             |
|---|-------------|-------------|-------------|
| O | -2.14248000 | 0.15037500  | 1.89461000  |
| O | -3.32231500 | -1.14986900 | -0.02412500 |
| P | -2.00872100 | -0.26750600 | 0.33665800  |
| O | -2.00134100 | 1.07522100  | -0.39927500 |
| N | -0.71400500 | -1.20595400 | 0.20066400  |
| S | -0.28128500 | -2.04141400 | -1.08802600 |

|   |             |             |             |
|---|-------------|-------------|-------------|
| C | -0.80183500 | -3.79614600 | -0.69744100 |
| F | -0.48973900 | -4.58152800 | -1.72940600 |
| F | -0.16706100 | -4.23849300 | 0.39424300  |
| F | -2.11895000 | -3.84719000 | -0.48419800 |
| C | 0.81696300  | 3.79359300  | -0.80805900 |
| C | 1.08211800  | 3.20598400  | -2.24065100 |
| H | 0.73701900  | 3.95351000  | -2.96846600 |
| H | 2.16429100  | 3.11457300  | -2.35950300 |
| C | 0.44092300  | 1.91459500  | -2.68048800 |
| C | 1.08730100  | 2.67745000  | 0.28159600  |
| H | 0.14094600  | 2.40547200  | 0.74913100  |
| H | 1.74339300  | 3.06445100  | 1.05911300  |
| N | 1.65737800  | 1.41439500  | -0.20065300 |
| C | 3.01561400  | 1.18306800  | -0.29406100 |
| N | 3.29574300  | -0.13107700 | -0.56859000 |
| C | 4.51019900  | -0.82637900 | -0.73350400 |
| C | 5.77387000  | -0.23910700 | -0.89333000 |
| C | 4.40769800  | -2.22880800 | -0.75218700 |
| C | 6.89889400  | -1.05238200 | -1.04670200 |
| C | 5.54401600  | -3.01860800 | -0.89123000 |
| H | 3.43517400  | -2.69695400 | -0.64852300 |
| C | 6.80576700  | -2.44212000 | -1.03899600 |
| H | 7.68925700  | -3.05932300 | -1.14324600 |
| C | 5.40066100  | -4.51200400 | -0.78010300 |
| C | 8.23613000  | -0.40066100 | -1.28854400 |
| F | 5.31396600  | -4.90255900 | 0.52051100  |
| F | 6.45252000  | -5.16777500 | -1.31387300 |
| F | 4.28452600  | -4.96221200 | -1.39055900 |
| F | 9.25928300  | -1.18972100 | -0.88832300 |
| F | 8.35230200  | 0.77546500  | -0.63756300 |
| F | 8.43166100  | -0.14341800 | -2.60375100 |
| S | 4.12993500  | 2.42957600  | -0.13545100 |
| H | 5.87568800  | 0.83577900  | -0.88166600 |
| C | -0.93213200 | 1.69373800  | -2.69876800 |
| H | 2.48731300  | -0.75398000 | -0.63619100 |
| H | -1.59155800 | 2.56038800  | -2.69521300 |
| H | -1.28304700 | 0.84892500  | -3.29075900 |
| O | 1.19380700  | -2.10951500 | -1.13388300 |
| H | 1.07697200  | 0.59756700  | -0.02056100 |
| O | -0.98320500 | -1.68646100 | -2.33160200 |
| H | -1.32236200 | 1.27527300  | -1.48963400 |
| C | -7.06416400 | 0.72010700  | 0.30144100  |
| C | -6.42550000 | 0.20997200  | 1.42612100  |
| C | -5.21567900 | -0.49138100 | 1.30417000  |



|   |             |             |             |
|---|-------------|-------------|-------------|
| C | -5.22714600 | -0.08458000 | -1.10540600 |
| C | -6.47967700 | 0.53620500  | -0.95038800 |
| C | -2.23191500 | -0.84250000 | 2.88876600  |
| C | -3.45492600 | -1.47523900 | 3.10991600  |
| C | -3.50548200 | -2.56519900 | 3.99469700  |
| C | -2.38706200 | -2.93512800 | 4.73214800  |
| C | -1.20871400 | -2.20771300 | 4.58235000  |
| C | -1.09158200 | -1.16051600 | 3.65128900  |
| H | -6.98375700 | 0.90142400  | -1.83990400 |
| H | -0.33784000 | -2.46063500 | 5.17895500  |
| C | -4.86824600 | -1.14631100 | 2.63558600  |
| C | -5.57511500 | -0.15624000 | 3.62250800  |
| H | -5.77837000 | -0.61178600 | 4.59623700  |
| H | -4.91827500 | 0.70556400  | 3.78767700  |
| H | -4.83288000 | -4.29282600 | 3.92540400  |
| H | -5.43357400 | -2.96021100 | 4.90570600  |
| C | -4.59798900 | -0.56527700 | 0.05854000  |
| H | -8.01000400 | 1.24846500  | 0.38978700  |
| H | -2.42907500 | -3.77120500 | 5.42549900  |
| C | -6.84940800 | 0.29364800  | 2.87600700  |
| H | -7.69470800 | -0.37698700 | 3.08385400  |
| H | -7.17196100 | 1.30187100  | 3.15956200  |
| C | -4.87847400 | -3.19970700 | 3.98804200  |
| C | -5.53486000 | -2.55908300 | 2.74796200  |
| H | -6.62565900 | -2.50157600 | 2.81142900  |
| H | -5.28208400 | -3.13928000 | 1.85304200  |
| C | 0.21090900  | -0.42982400 | 3.56844400  |
| C | 0.29207100  | 0.92146300  | 3.98974300  |
| C | 1.38657500  | -1.13474400 | 3.20617000  |
| C | -0.84328100 | 1.67160400  | 4.43764100  |
| C | 1.57805100  | 1.58254400  | 4.01776300  |
| C | 2.66983700  | -0.47417300 | 3.28888700  |
| C | -0.72571100 | 2.97571700  | 4.84302300  |
| H | -1.81331600 | 1.18868000  | 4.46779500  |
| C | 1.65516200  | 2.94970400  | 4.43314900  |
| C | 2.72890800  | 0.86797600  | 3.67398700  |
| C | 0.53766300  | 3.63269300  | 4.83121000  |
| H | -1.60543900 | 3.51573100  | 5.18299300  |
| H | 2.63110400  | 3.42918600  | 4.43692800  |
| H | 3.69496600  | 1.36587700  | 3.71445600  |
| H | 0.61009000  | 4.66820100  | 5.15206700  |
| C | -4.65207500 | -0.22041900 | -2.47826600 |
| C | -4.46806300 | -1.50442700 | -3.05020800 |
| C | -4.38452500 | 0.94474800  | -3.24179200 |

|   |             |             |             |
|---|-------------|-------------|-------------|
| C | -4.76892600 | -2.71899900 | -2.35504300 |
| C | -3.98597700 | -1.61759900 | -4.40789100 |
| C | -3.94201600 | 0.81378600  | -4.61236300 |
| C | -4.57127800 | -3.94351600 | -2.93685100 |
| H | -5.16707500 | -2.66482000 | -1.34870800 |
| C | -3.78834300 | -2.91428700 | -4.97664600 |
| C | -3.74536400 | -0.46002900 | -5.15221200 |
| C | -4.06582400 | -4.04796700 | -4.26337500 |
| H | -4.80534900 | -4.84786800 | -2.38180400 |
| H | -3.41337800 | -2.97659200 | -5.99533500 |
| H | -3.40292100 | -0.55323700 | -6.18088900 |
| H | -3.91019000 | -5.02817800 | -4.70529200 |
| C | 2.53164400  | -3.15907100 | 2.45522600  |
| H | 2.49001500  | -4.18404200 | 2.09707100  |
| C | 1.37059300  | -2.49224200 | 2.74831100  |
| H | 0.41823400  | -2.98760800 | 2.60967100  |
| C | 3.79680000  | -2.51944100 | 2.59046000  |
| H | 4.70058500  | -3.07008200 | 2.35004000  |
| C | 3.85784800  | -1.20924100 | 2.98140300  |
| H | 4.81309200  | -0.69622900 | 3.05937500  |
| C | -4.28228600 | 3.37771200  | -3.49467300 |
| H | -4.39661700 | 4.37064000  | -3.06767900 |
| C | -3.88294900 | 3.24034400  | -4.85519300 |
| H | -3.70930400 | 4.12693900  | -5.45904300 |
| C | -3.70929000 | 1.99228600  | -5.38966500 |
| H | -3.39043800 | 1.87048100  | -6.42229300 |
| C | -4.51736600 | 2.27265400  | -2.71651300 |
| H | -4.79755300 | 2.39973800  | -1.67764100 |
| C | -0.68727600 | 4.27362000  | -0.72288900 |
| H | -0.89031200 | 4.84890500  | -1.63631200 |
| H | -1.32406800 | 3.38892200  | -0.74772900 |
| C | -1.12329600 | 5.11412700  | 0.46953000  |
| C | -1.59567000 | 4.54403800  | 1.58468600  |
| H | -1.92922700 | 5.14491800  | 2.42753100  |
| H | -1.67952100 | 3.46718600  | 1.70046100  |
| C | 1.73183400  | 5.02485200  | -0.60234200 |
| C | 2.23448400  | 5.77687500  | -1.67487700 |
| C | 2.01851100  | 5.49088400  | 0.69335600  |
| C | 3.00303200  | 6.92510600  | -1.46909800 |
| H | 2.04685500  | 5.47641000  | -2.69978300 |
| C | 2.78427700  | 6.63610000  | 0.90345300  |
| H | 1.62308300  | 4.97322500  | 1.56014800  |
| C | 3.28661900  | 7.36132000  | -0.17743200 |
| H | 3.38173800  | 7.47329900  | -2.32793400 |

|   |             |             |             |
|---|-------------|-------------|-------------|
| H | 2.98771200  | 6.96098900  | 1.92060200  |
| H | 3.88813100  | 8.25140100  | -0.01432400 |
| C | 1.33537100  | 0.89366500  | -3.31247800 |
| H | 2.32754400  | 0.85130000  | -2.86152900 |
| H | 0.87737300  | -0.09858200 | -3.32703300 |
| H | 1.47186200  | 1.20511900  | -4.36106500 |
| C | -1.11846000 | 6.61498300  | 0.29373200  |
| H | -1.82208800 | 6.90348400  | -0.50086200 |
| H | -1.42363900 | 7.12651200  | 1.21225700  |
| H | -0.13534300 | 6.99436400  | -0.00148200 |

INT-15

0 imaginary frequency

H = -5393.936535

G = -5394.150226

E(M06-2X-DCM) = -5394.879856

|   |             |             |             |
|---|-------------|-------------|-------------|
| O | -0.11522000 | -2.69661500 | -0.42022000 |
| O | -2.35518400 | -1.45220400 | -0.02058800 |
| P | -0.73048900 | -1.26066100 | 0.08862900  |
| O | -0.34506600 | -0.12818200 | -0.81537900 |
| C | -0.90515200 | -3.77780500 | -4.38938100 |
| C | -1.83067600 | -4.03619000 | -3.38323000 |
| C | -1.52572500 | -3.74641900 | -2.04558300 |
| C | 0.64869300  | -2.87397300 | -2.72258900 |
| C | 0.33274800  | -3.23656800 | -4.04477000 |
| C | -2.98371100 | -2.46300500 | 0.71565600  |
| C | -2.96533900 | -3.77340800 | 0.23635400  |
| C | -3.44400200 | -4.80925200 | 1.05474000  |
| C | -4.03385800 | -4.53156300 | 2.28231300  |
| C | -4.16171500 | -3.20260800 | 2.68243600  |
| C | -3.63976200 | -2.14378700 | 1.92081500  |
| H | 1.08122100  | -3.07175000 | -4.81404800 |
| H | -4.66268800 | -2.96379400 | 3.61587500  |
| C | -2.58949300 | -4.33743300 | -1.13060500 |
| C | -3.81932700 | -4.34179600 | -2.10083500 |
| H | -4.27734500 | -3.34539000 | -2.09320000 |
| H | -4.58699900 | -5.06144900 | -1.80002300 |
| H | -4.14355600 | -6.58270800 | 0.01978500  |
| H | -2.79456300 | -6.89083500 | 1.10791200  |
| C | -0.33153000 | -3.09773800 | -1.73670800 |
| H | -1.12902400 | -4.01133400 | -5.42743700 |
| H | -4.40585000 | -5.33263100 | 2.91611100  |
| C | -3.21830700 | -4.63101600 | -3.49419200 |
| H | -3.80404500 | -4.18853100 | -4.30841700 |

|   |             |             |             |
|---|-------------|-------------|-------------|
| H | -3.17261700 | -5.71099500 | -3.69302900 |
| C | -3.20746200 | -6.15614700 | 0.40720700  |
| C | -2.23045900 | -5.80974500 | -0.73579200 |
| H | -1.20081500 | -5.83038700 | -0.36082100 |
| H | -2.29064500 | -6.49687200 | -1.58567100 |
| C | -3.88611300 | -0.74492000 | 2.39182000  |
| C | -3.29916700 | -0.28187400 | 3.59362500  |
| C | -4.82274400 | 0.06273100  | 1.69853300  |
| C | -2.32553100 | -1.03947300 | 4.32027400  |
| C | -3.67298100 | 1.01224800  | 4.11932200  |
| C | -5.17474400 | 1.36067300  | 2.22791400  |
| C | -1.77864900 | -0.56515700 | 5.48279000  |
| H | -1.98931000 | -1.98436500 | 3.91382100  |
| C | -3.08725100 | 1.46379400  | 5.34380200  |
| C | -4.59757200 | 1.79528500  | 3.42415100  |
| C | -2.17008400 | 0.69805300  | 6.01056900  |
| H | -1.01831600 | -1.14811000 | 5.99399700  |
| H | -3.38654800 | 2.43587200  | 5.72930100  |
| H | -4.87664400 | 2.76802700  | 3.82434200  |
| H | -1.72570900 | 1.05506500  | 6.93580500  |
| C | 2.01640300  | -2.34142900 | -2.43460900 |
| C | 2.45280800  | -1.14865000 | -3.06312400 |
| C | 2.91954600  | -3.09626100 | -1.64317500 |
| C | 1.57399600  | -0.30020000 | -3.81336000 |
| C | 3.83563500  | -0.74319900 | -2.94898400 |
| C | 4.28213400  | -2.64028600 | -1.48488200 |
| C | 2.03727000  | 0.82132800  | -4.45232200 |
| H | 0.51916600  | -0.54457500 | -3.85595800 |
| C | 4.28468700  | 0.41910600  | -3.65476200 |
| C | 4.70845200  | -1.48969900 | -2.15351500 |
| C | 3.41505200  | 1.17869700  | -4.39217700 |
| H | 1.34231000  | 1.44441600  | -5.00814300 |
| H | 5.33720800  | 0.68462700  | -3.58710500 |
| H | 5.74036700  | -1.16352300 | -2.04628000 |
| H | 3.77065300  | 2.05506000  | -4.92835500 |
| C | -6.38273300 | 0.44578300  | -0.14855900 |
| H | -6.86559300 | 0.09565000  | -1.05726100 |
| C | -5.47843400 | -0.35880400 | 0.49609100  |
| H | -5.25847100 | -1.34274600 | 0.09770100  |
| C | -6.70820100 | 1.73292700  | 0.36699900  |
| H | -7.42832000 | 2.35727500  | -0.15505300 |
| C | -6.12193700 | 2.16932000  | 1.52483700  |
| H | -6.36971300 | 3.14420600  | 1.93821300  |
| C | 3.45445700  | -5.02104300 | -0.23432300 |

|   |              |              |              |
|---|--------------|--------------|--------------|
| H | 3. 14725300  | -5. 94630300 | 0. 24559800  |
| C | 4. 78532700  | -4. 54904300 | -0. 05667900 |
| H | 5. 47950900  | -5. 11240200 | 0. 56089000  |
| C | 5. 18471500  | -3. 39435800 | -0. 67188200 |
| H | 6. 20178700  | -3. 02684600 | -0. 55797200 |
| C | 2. 55906400  | -4. 32475200 | -1. 00281900 |
| H | 1. 55468100  | -4. 70963100 | -1. 13080000 |
| C | -2. 02679300 | 3. 24417100  | -1. 74291300 |
| C | -2. 61697100 | 2. 77428600  | -0. 37072400 |
| H | -3. 70159900 | 2. 69207800  | -0. 49601800 |
| H | -2. 25445600 | 1. 76205400  | -0. 16931300 |
| C | -2. 32547600 | 3. 62865100  | 0. 86503000  |
| C | -0. 53151000 | 3. 62902400  | -1. 57612000 |
| H | -0. 47742500 | 4. 41851600  | -0. 81973800 |
| H | -0. 15832100 | 4. 03582100  | -2. 52405600 |
| N | 0. 34404800  | 2. 52202000  | -1. 16048100 |
| C | 1. 57817900  | 2. 67134500  | -0. 70584600 |
| N | 2. 25837600  | 1. 65750500  | -0. 16566100 |
| C | 3. 58890600  | 1. 76718900  | 0. 36438800  |
| C | 4. 67108300  | 1. 90495900  | -0. 50144300 |
| C | 3. 78169100  | 1. 69101000  | 1. 74741500  |
| C | 5. 96310400  | 1. 98665400  | 0. 02252100  |
| C | 5. 07875200  | 1. 76986500  | 2. 25335100  |
| H | 2. 93359400  | 1. 55277500  | 2. 40987000  |
| C | 6. 17266700  | 1. 92057700  | 1. 39766400  |
| H | 7. 17511500  | 1. 99011700  | 1. 80179100  |
| C | 5. 30634200  | 1. 64400300  | 3. 74020600  |
| C | 7. 11710300  | 2. 11557500  | -0. 93573300 |
| F | 5. 42891000  | 0. 35448500  | 4. 11460400  |
| F | 4. 28839400  | 2. 17475000  | 4. 44485500  |
| F | 6. 44118500  | 2. 27726600  | 4. 11879100  |
| F | 6. 92714600  | 3. 13522900  | -1. 80252700 |
| F | 7. 26398200  | 0. 99531800  | -1. 69103200 |
| F | 8. 28772200  | 2. 32589300  | -0. 30470500 |
| S | 2. 43119600  | 4. 23319900  | -0. 73119300 |
| H | 4. 50316700  | 1. 93553000  | -1. 57199800 |
| H | 1. 79232400  | 0. 75298800  | 0. 00584200  |
| H | -0. 03907600 | 1. 55499100  | -1. 12373400 |
| C | -3. 14477600 | 4. 64382400  | 1. 18868800  |
| H | -3. 99732300 | 4. 82044400  | 0. 53565200  |
| H | 1. 51391200  | 4. 87860200  | -1. 47214000 |
| N | -0. 41468200 | -1. 18580700 | 1. 66913700  |
| S | 1. 04870400  | -0. 94111300 | 2. 22625900  |
| O | 1. 08182100  | 0. 05352000  | 3. 30785300  |

|   |             |             |             |
|---|-------------|-------------|-------------|
| O | 2.08134400  | -0.80117400 | 1.16333100  |
| C | 1.46095100  | -2.56230500 | 3.05760200  |
| F | 1.41744000  | -3.56578500 | 2.17785300  |
| F | 0.58474700  | -2.81227700 | 4.04276400  |
| F | 2.68816900  | -2.49458200 | 3.58384500  |
| C | -2.15031600 | 2.16215300  | -2.84172900 |
| C | -2.77459900 | 0.92575100  | -2.62983000 |
| C | -1.63290100 | 2.41265200  | -4.12598600 |
| C | -2.88070500 | -0.01586100 | -3.65660700 |
| H | -3.18623400 | 0.67139700  | -1.66176500 |
| C | -1.74152400 | 1.47843000  | -5.15513000 |
| H | -1.14364500 | 3.35870200  | -4.34420900 |
| C | -2.36843700 | 0.25238400  | -4.92373300 |
| H | -3.35828300 | -0.96944800 | -3.45117600 |
| H | -1.33825800 | 1.71116700  | -6.13757500 |
| H | -2.45062300 | -0.48293200 | -5.71934500 |
| C | -2.69871900 | 4.58702600  | -2.21741200 |
| H | -2.41338700 | 5.36495600  | -1.50037300 |
| H | -2.22853000 | 4.86256500  | -3.17302600 |
| C | -4.20917700 | 4.66592700  | -2.40939900 |
| C | -4.87439500 | 5.67812500  | -1.82431100 |
| H | -4.29866000 | 6.35420800  | -1.19084800 |
| C | -1.16175900 | 3.19742700  | 1.73509100  |
| H | -1.20736800 | 3.63387100  | 2.73494600  |
| H | -1.14964500 | 2.10860600  | 1.86129700  |
| H | -0.18742900 | 3.47568100  | 1.31226000  |
| C | -4.86472700 | 3.67986100  | -3.34720000 |
| H | -4.29872300 | 3.59130700  | -4.28197800 |
| H | -4.90279200 | 2.67301900  | -2.91711800 |
| H | -5.88658600 | 3.97149300  | -3.60006300 |
| C | -3.06047200 | 5.57871600  | 2.36341300  |
| H | -3.95619400 | 5.49430100  | 2.99489100  |
| H | -2.18765900 | 5.40571100  | 2.99755500  |
| H | -3.02160400 | 6.62388300  | 2.02550000  |
| C | -6.33160300 | 6.03451900  | -1.92285800 |
| H | -6.45623200 | 7.05636700  | -2.30695300 |
| H | -6.90347900 | 5.36363900  | -2.56828800 |
| H | -6.80153100 | 6.01795300  | -0.92981800 |

INT-15'

0 imaginary frequency

H = -5393.957668

G = -5394.166900

E(M06-2X-DCM) = -5394.887196

|   |             |             |             |
|---|-------------|-------------|-------------|
| C | -2.17949700 | 4.25097800  | 0.50351100  |
| C | -2.97417200 | 3.63862000  | 1.71474700  |
| H | -2.54229100 | 2.65491600  | 1.92704900  |
| H | -2.76868500 | 4.26313400  | 2.59417700  |
| C | -4.48392700 | 3.47860300  | 1.60462900  |
| C | -2.59936300 | 3.53598100  | -0.80378300 |
| H | -2.15196700 | 4.02542400  | -1.67602800 |
| H | -3.68078000 | 3.61431000  | -0.92137300 |
| N | -2.27522900 | 2.11508400  | -0.79916900 |
| C | -2.99236100 | 1.16486500  | -1.44691200 |
| N | -2.44783000 | -0.09722700 | -1.28390100 |
| C | -2.98660300 | -1.35923300 | -1.55574800 |
| C | -4.36431000 | -1.62636500 | -1.63058500 |
| C | -2.08612800 | -2.42971800 | -1.67889300 |
| C | -4.80884100 | -2.92927900 | -1.84166800 |
| C | -2.55285500 | -3.72704600 | -1.88470900 |
| H | -1.01946300 | -2.24642700 | -1.60001800 |
| C | -3.91731600 | -3.99342900 | -1.97928400 |
| H | -4.27653200 | -5.00020700 | -2.15344300 |
| C | -1.57460200 | -4.86511000 | -1.91310200 |
| C | -6.28735300 | -3.21373700 | -1.81407400 |
| F | -2.04119600 | -5.93235700 | -2.59141400 |
| F | -1.28391600 | -5.30257000 | -0.65391700 |
| F | -0.39258700 | -4.51295200 | -2.47314700 |
| F | -7.02305700 | -2.16078600 | -2.21690100 |
| F | -6.70235500 | -3.52557700 | -0.55601800 |
| F | -6.61255100 | -4.26664400 | -2.59658800 |
| S | -4.36165700 | 1.50964100  | -2.37366100 |
| H | -5.07415200 | -0.81899100 | -1.52819200 |
| C | -5.00179900 | 2.25380600  | 1.41156700  |
| H | -1.48972900 | -0.11278000 | -0.93265200 |
| H | -1.37725800 | 1.84556500  | -0.40495500 |
| H | 1.55272400  | 1.51601700  | 1.77313700  |
| O | 0.71075800  | -1.67832400 | 0.91587000  |
| O | 2.75830200  | -0.74314700 | -0.34457000 |
| P | 1.38080200  | -0.31946900 | 0.37214500  |
| O | 0.35442800  | 0.43610700  | -0.38600200 |
| C | 2.64706800  | -3.83374900 | 3.92949700  |
| C | 3.08635600  | -3.92655100 | 2.61378300  |
| C | 2.36972600  | -3.31163700 | 1.57422500  |
| C | 0.80645700  | -2.39166100 | 3.22017400  |
| C | 1.48839800  | -3.10867800 | 4.21516900  |
| C | 2.77265200  | -1.68481700 | -1.39799800 |
| C | 2.77834200  | -3.04364000 | -1.09253000 |

|   |              |              |              |
|---|--------------|--------------|--------------|
| C | 2. 70545100  | -3. 96178300 | -2. 15517300 |
| C | 2. 70741300  | -3. 53134500 | -3. 47698700 |
| C | 2. 77708500  | -2. 16606400 | -3. 75038100 |
| C | 2. 79899000  | -1. 21052200 | -2. 72301500 |
| H | 1. 11426900  | -3. 06259100 | 5. 23357300  |
| H | 2. 79636300  | -1. 81638700 | -4. 77830600 |
| C | 2. 91296800  | -3. 79580400 | 0. 23208400  |
| C | 4. 40492000  | -4. 05275400 | 0. 62530900  |
| H | 4. 90956300  | -4. 72984700 | -0. 07091500 |
| H | 4. 94172900  | -3. 09730700 | 0. 62128300  |
| H | 1. 84615500  | -5. 95834000 | -2. 17311900 |
| H | 3. 55637200  | -5. 90870200 | -1. 74098900 |
| C | 1. 30953500  | -2. 47972300 | 1. 90887000  |
| H | 3. 19476100  | -4. 32075000 | 4. 73216100  |
| H | 2. 65025300  | -4. 24882000 | -4. 29120300 |
| C | 4. 32760900  | -4. 60188400 | 2. 06940900  |
| H | 4. 23231300  | -5. 69622600 | 2. 07962900  |
| H | 5. 21838100  | -4. 35699800 | 2. 65827300  |
| C | 2. 60092600  | -5. 37621100 | -1. 63533200 |
| C | 2. 23305700  | -5. 15585200 | -0. 15571200 |
| H | 2. 54587500  | -5. 97499100 | 0. 49786400  |
| H | 1. 14779400  | -5. 05193800 | -0. 06502400 |
| C | 2. 88238500  | 0. 24502100  | -3. 07129400 |
| C | 4. 13200800  | 0. 90522000  | -2. 99080300 |
| C | 1. 73958800  | 0. 93014400  | -3. 54672700 |
| C | 5. 33692500  | 0. 24043800  | -2. 59571300 |
| C | 4. 22363100  | 2. 30311600  | -3. 34584800 |
| C | 1. 84587300  | 2. 32807100  | -3. 90230000 |
| C | 6. 53308900  | 0. 90718200  | -2. 53466500 |
| H | 5. 29561200  | -0. 81425800 | -2. 34669700 |
| C | 5. 48862800  | 2. 96408300  | -3. 25774800 |
| C | 3. 07852100  | 2. 97622600  | -3. 78297600 |
| C | 6. 61302900  | 2. 29052400  | -2. 86266000 |
| H | 7. 43281400  | 0. 37586900  | -2. 23598000 |
| H | 5. 53770100  | 4. 01776900  | -3. 52244400 |
| H | 3. 15312600  | 4. 02740600  | -4. 05530700 |
| H | 7. 56933100  | 2. 80316000  | -2. 80570000 |
| C | -0. 42022900 | -1. 59590400 | 3. 54160900  |
| C | -1. 67653900 | -2. 02132600 | 3. 03944000  |
| C | -0. 33338000 | -0. 44329700 | 4. 36087300  |
| C | -1. 84044600 | -3. 20489900 | 2. 25101400  |
| C | -2. 86226300 | -1. 24898400 | 3. 33435500  |
| C | -1. 53088900 | 0. 31369600  | 4. 65472200  |
| C | -3. 06762300 | -3. 57875500 | 1. 76908600  |



|   |             |             |             |
|---|-------------|-------------|-------------|
| H | -0.97442700 | -3.81944700 | 2.03328100  |
| C | -4.12270400 | -1.66955600 | 2.80421300  |
| C | -2.75646200 | -0.10354900 | 4.12878900  |
| C | -4.22750200 | -2.79758600 | 2.03576100  |
| H | -3.15192700 | -4.47638600 | 1.16483200  |
| H | -4.99956000 | -1.06601900 | 3.02655900  |
| H | -3.65076100 | 0.47870500  | 4.34089500  |
| H | -5.18313300 | -3.09516700 | 1.61462500  |
| C | -0.62445200 | 0.99496000  | -4.16555600 |
| H | -1.58556500 | 0.50006000  | -4.26685300 |
| C | 0.46199700  | 0.30120100  | -3.70090100 |
| H | 0.36200700  | -0.74812100 | -3.44626900 |
| C | -0.51621100 | 2.37475800  | -4.50336900 |
| H | -1.39369400 | 2.90569100  | -4.86072900 |
| C | 0.68520400  | 3.01834800  | -4.37530100 |
| H | 0.78391100  | 4.06912200  | -4.63840900 |
| C | 0.95081800  | 1.16328200  | 5.68494800  |
| H | 1.90619600  | 1.50469800  | 6.07242800  |
| C | -0.23297500 | 1.89846200  | 5.97827900  |
| H | -0.17537800 | 2.78642200  | 6.60207100  |
| C | -1.43599200 | 1.48268200  | 5.47400900  |
| H | -2.34900400 | 2.03315300  | 5.68874700  |
| C | 0.90157400  | 0.03539400  | 4.90727000  |
| H | 1.81471800  | -0.50842200 | 4.69560900  |
| N | 2.03456000  | 0.62615800  | 1.61931400  |
| S | 3.54442800  | 0.61021500  | 2.37733400  |
| C | 4.79137200  | 1.14162500  | 1.04808600  |
| O | 3.90946100  | -0.75083900 | 2.73665900  |
| O | 3.50407600  | 1.70541800  | 3.33785800  |
| F | 5.72040000  | 1.87725200  | 1.65727900  |
| F | 5.35796800  | 0.06785900  | 0.51176300  |
| F | 4.19290300  | 1.87061000  | 0.10912700  |
| C | -0.66203700 | 4.12577000  | 0.75712500  |
| C | -0.12600500 | 4.09421100  | 2.05687900  |
| C | 0.25241300  | 4.09946400  | -0.31258100 |
| C | 1.25360900  | 4.07095900  | 2.27971900  |
| H | -0.77921900 | 4.08978500  | 2.92136700  |
| C | 1.63080600  | 4.07612800  | -0.09681700 |
| H | -0.10470900 | 4.10233600  | -1.33597400 |
| C | 2.14146300  | 4.07492300  | 1.20179500  |
| H | 1.63259000  | 4.04506900  | 3.29738100  |
| H | 2.30329800  | 4.04871000  | -0.94961400 |
| H | 3.21302900  | 4.06189800  | 1.37563200  |
| C | -2.56700600 | 5.77339100  | 0.35868400  |

|   |             |            |             |
|---|-------------|------------|-------------|
| H | -3.61792700 | 5.80663300 | 0.05627900  |
| H | -2.51853100 | 6.21182800 | 1.36397300  |
| C | -1.76228400 | 6.65287000 | -0.58984100 |
| C | -2.14160900 | 6.78001700 | -1.87310600 |
| C | -6.44649500 | 1.86726600 | 1.27572900  |
| H | -6.64335900 | 1.51420900 | 0.25446400  |
| H | -6.69838100 | 1.03764300 | 1.95052300  |
| H | -7.13748900 | 2.68989500 | 1.47939900  |
| C | -1.51856400 | 7.61140800 | -2.95969000 |
| H | -2.22750300 | 8.36615600 | -3.32760600 |
| H | -0.61367200 | 8.13448600 | -2.64008000 |
| H | -1.25644700 | 6.98721700 | -3.82500400 |
| C | -0.62238800 | 7.42108600 | 0.03880900  |
| H | -1.01736100 | 8.15181100 | 0.75964300  |
| H | 0.04848000  | 6.76074800 | 0.59760400  |
| H | -0.02180500 | 7.97027000 | -0.69014900 |
| C | -5.34647100 | 4.71040400 | 1.80056400  |
| H | -4.86179000 | 5.42758200 | 2.47340700  |
| H | -5.54366600 | 5.24148200 | 0.86011400  |
| H | -6.32041400 | 4.46152200 | 2.23201400  |
| H | -3.02546800 | 6.22411500 | -2.19039000 |
| H | -4.30224000 | 1.42490100 | 1.30491800  |

INT-15' -1

0 imaginary frequency

H = -5393.957668

G = -5394.166910

E(M06-2X-DCM) = -5394.887197

|   |             |             |             |
|---|-------------|-------------|-------------|
| C | -2.18428500 | 4.24901800  | 0.50335100  |
| C | -2.97825700 | 3.63580200  | 1.71460500  |
| H | -2.54519700 | 2.65262900  | 1.92697700  |
| H | -2.77357600 | 4.26062000  | 2.59400700  |
| C | -4.48782800 | 3.47390800  | 1.60447500  |
| C | -2.60338500 | 3.53356000  | -0.80392500 |
| H | -2.15648800 | 4.02345000  | -1.67617400 |
| H | -3.68488100 | 3.61069700  | -0.92155600 |
| N | -2.27766900 | 2.11303200  | -0.79924100 |
| C | -2.99393500 | 1.16185400  | -1.44659200 |
| N | -2.44802000 | -0.09957900 | -1.28332600 |
| C | -2.98523300 | -1.36221300 | -1.55532000 |
| C | -4.36256700 | -1.63102500 | -1.63071000 |
| C | -2.08341500 | -2.43164100 | -1.67815700 |
| C | -4.80544700 | -2.93448200 | -1.84203100 |
| C | -2.54848700 | -3.72949800 | -1.88421800 |

|   |              |              |              |
|---|--------------|--------------|--------------|
| H | -1. 01700500 | -2. 24706000 | -1. 59885300 |
| C | -3. 91261500 | -3. 99754500 | -1. 97933800 |
| H | -4. 27053900 | -5. 00474500 | -2. 15364900 |
| C | -1. 56884700 | -4. 86637100 | -1. 91234000 |
| C | -6. 28368700 | -3. 22044400 | -1. 81498200 |
| F | -1. 27786600 | -5. 30341000 | -0. 65307500 |
| F | -0. 38714000 | -4. 51280700 | -2. 47216800 |
| F | -2. 03398900 | -5. 93423600 | -2. 59068300 |
| F | -6. 60715700 | -4. 27579500 | -2. 59490000 |
| F | -7. 02006500 | -2. 16930500 | -2. 22139300 |
| F | -6. 69953200 | -3. 52912800 | -0. 55645400 |
| S | -4. 36391200 | 1. 50487000  | -2. 37297000 |
| H | -5. 07340500 | -0. 82447100 | -1. 52867300 |
| C | -5. 00420300 | 2. 24843800  | 1. 41179000  |
| H | -1. 48987500 | -0. 11398900 | -0. 93206100 |
| H | -1. 37917500 | 1. 84464500  | -0. 40546000 |
| H | 1. 55058600  | 1. 51777200  | 1. 77259200  |
| O | 0. 71255600  | -1. 67774100 | 0. 91619100  |
| O | 2. 75897600  | -0. 74048600 | -0. 34455600 |
| P | 1. 38094300  | -0. 31832500 | 0. 37194300  |
| O | 0. 35368400  | 0. 43560700  | -0. 38667300 |
| C | 2. 65151500  | -3. 83046200 | 3. 93005100  |
| C | 3. 09087600  | -3. 92293000 | 2. 61434400  |
| C | 2. 37349900  | -3. 30902800 | 1. 57469500  |
| C | 0. 80922300  | -2. 39062300 | 3. 22058100  |
| C | 1. 49201100  | -3. 10670300 | 4. 21565300  |
| C | 2. 77454100  | -1. 68232000 | -1. 39783800 |
| C | 2. 78178800  | -3. 04107800 | -1. 09212000 |
| C | 2. 71003500  | -3. 95950000 | -2. 15458900 |
| C | 2. 71162700  | -3. 52929900 | -3. 47648400 |
| C | 2. 77974400  | -2. 16399500 | -3. 75012100 |
| C | 2. 80042200  | -1. 20823200 | -2. 72292700 |
| H | 1. 11786100  | -3. 06090600 | 5. 23406200  |
| H | 2. 79869800  | -1. 81448000 | -4. 77810800 |
| C | 2. 91726200  | -3. 79283000 | 0. 23263500  |
| C | 4. 40954000  | -4. 04794300 | 0. 62587600  |
| H | 4. 91497600  | -4. 72454300 | -0. 07025000 |
| H | 4. 94519300  | -3. 09184600 | 0. 62168600  |
| H | 1. 85297100  | -5. 95700900 | -2. 17217400 |
| H | 3. 56313100  | -5. 90538800 | -1. 74004400 |
| C | 1. 31233900  | -2. 47829800 | 1. 90923600  |
| H | 3. 19981300  | -4. 31669300 | 4. 73276800  |
| H | 2. 65535100  | -4. 24698800 | -4. 29057400 |
| C | 4. 33289800  | -4. 59691600 | 2. 07006000  |

|   |             |             |             |
|---|-------------|-------------|-------------|
| H | 4.23885900  | -5.69136500 | 2.08047400  |
| H | 5.22340200  | -4.35090800 | 2.65886200  |
| C | 2.60709100  | -5.37394500 | -1.63448600 |
| C | 2.23896800  | -5.15374500 | -0.15490000 |
| H | 2.55279300  | -5.97239500 | 0.49880800  |
| H | 1.15358600  | -5.05112900 | -0.06419800 |
| C | 2.88210600  | 0.24734000  | -3.07149300 |
| C | 4.13098800  | 0.90896100  | -2.99124000 |
| C | 1.73848200  | 0.93107400  | -3.54692800 |
| C | 5.33668000  | 0.24563700  | -2.59605200 |
| C | 4.22099500  | 2.30688900  | -3.34657000 |
| C | 1.84314000  | 2.32906100  | -3.90274100 |
| C | 6.53208800  | 0.91375200  | -2.53522400 |
| H | 5.29657200  | -0.80904800 | -2.34679100 |
| C | 5.48525400  | 2.96930300  | -3.25872200 |
| C | 3.07507400  | 2.97862500  | -3.78368400 |
| C | 6.61044200  | 2.29710600  | -2.86355600 |
| H | 7.43243100  | 0.38353700  | -2.23645200 |
| H | 5.53311900  | 4.02298200  | -3.52366300 |
| H | 3.14845700  | 4.02984300  | -4.05620300 |
| H | 7.56616700  | 2.81083600  | -2.80678000 |
| C | -0.41830000 | -1.59612200 | 3.54196100  |
| C | -1.67416800 | -2.02282500 | 3.03977600  |
| C | -0.33263900 | -0.44341900 | 4.36122000  |
| C | -1.83686800 | -3.20659300 | 2.25139200  |
| C | -2.86066500 | -1.25164400 | 3.33461200  |
| C | -1.53091800 | 0.31236700  | 4.65503100  |
| C | -3.06364400 | -3.58166300 | 1.76939100  |
| H | -0.97022800 | -3.82029900 | 2.03375300  |
| C | -4.12065100 | -1.67345600 | 2.80438200  |
| C | -2.75604700 | -0.10610400 | 4.12904500  |
| C | -4.22429400 | -2.80160200 | 2.03594500  |
| H | -3.14702600 | -4.47940700 | 1.16517800  |
| H | -4.99811900 | -1.07077700 | 3.02663900  |
| H | -3.65093900 | 0.47524900  | 4.34112000  |
| H | -5.17960600 | -3.10005600 | 1.61470900  |
| C | -0.62567400 | 0.99306200  | -4.16557800 |
| H | -1.58621400 | 0.49702600  | -4.26675600 |
| C | 0.46161700  | 0.30061900  | -3.70092600 |
| H | 0.36286400  | -0.74878200 | -3.44614000 |
| C | -0.51905700 | 2.37294000  | -4.50356900 |
| H | -1.39718200 | 2.90281400  | -4.86092800 |
| C | 0.68162800  | 3.01793700  | -4.37571100 |
| H | 0.77909000  | 4.06878900  | -4.63897000 |

|   |             |             |             |
|---|-------------|-------------|-------------|
| C | 0.94989700  | 1.16443100  | 5.68536300  |
| H | 1.90490800  | 1.50681700  | 6.07289100  |
| C | -0.23465000 | 1.89840500  | 5.97867100  |
| H | -0.17797400 | 2.78640800  | 6.60248600  |
| C | -1.43722600 | 1.48143500  | 5.47433900  |
| H | -2.35079200 | 2.03099800  | 5.68904500  |
| C | 0.90182300  | 0.03651600  | 4.90765400  |
| H | 1.81552800  | -0.50634500 | 4.69596500  |
| N | 2.03345100  | 0.62845400  | 1.61888700  |
| S | 3.54341300  | 0.61449800  | 2.37684500  |
| C | 4.78970900  | 1.14716300  | 1.04747200  |
| O | 3.91013300  | -0.74604000 | 2.73639600  |
| O | 3.50177100  | 1.70980800  | 3.33718300  |
| F | 5.71777200  | 1.88410900  | 1.65655900  |
| F | 5.35770000  | 0.07399600  | 0.51142700  |
| F | 4.19037600  | 1.87517500  | 0.10832500  |
| C | -0.66669400 | 4.12534200  | 0.75698000  |
| C | -0.13071000 | 4.09438800  | 2.05677500  |
| C | 0.24782500  | 4.09983400  | -0.31266800 |
| C | 1.24890200  | 4.07251100  | 2.27969800  |
| H | -0.78399700 | 4.08933600  | 2.92120600  |
| C | 1.62624000  | 4.07787200  | -0.09681400 |
| H | -0.10922100 | 4.10226300  | -1.33608800 |
| C | 2.13681900  | 4.07727600  | 1.20182000  |
| H | 1.62785100  | 4.04701700  | 3.29737800  |
| H | 2.29880000  | 4.05105900  | -0.94957500 |
| H | 3.20838500  | 4.06529500  | 1.37571900  |
| C | -2.57323200 | 5.77106400  | 0.35864200  |
| H | -3.62425900 | 5.80341100  | 0.05650600  |
| H | -2.52487300 | 6.20950300  | 1.36392900  |
| C | -1.76954700 | 6.65132500  | -0.59010100 |
| C | -2.14918700 | 6.77795700  | -1.87330700 |
| H | -3.03248500 | 6.22107500  | -2.19046400 |
| C | -6.44839700 | 1.86002400  | 1.27602700  |
| H | -6.64466100 | 1.50626200  | 0.25488000  |
| H | -6.69926000 | 1.03033100  | 1.95111800  |
| H | -7.14046500 | 2.68184800  | 1.47925600  |
| C | -1.52713600 | 7.60987200  | -2.96003100 |
| H | -0.62300300 | 8.13427300  | -2.64044900 |
| H | -1.26408200 | 6.98579000  | -3.82515500 |
| H | -2.23709000 | 8.36352100  | -3.32823100 |
| C | -0.63034700 | 7.42073300  | 0.03833300  |
| H | -1.02593800 | 8.15098000  | 0.75931200  |
| H | 0.04137100  | 6.76106300  | 0.59688300  |

|   |             |            |             |
|---|-------------|------------|-------------|
| H | -0.03052700 | 7.97062900 | -0.69073100 |
| H | -4.30364400 | 1.42032800 | 1.30538400  |
| C | -5.35186500 | 4.70473000 | 1.80002100  |
| H | -6.32558300 | 4.45476000 | 2.23135800  |
| H | -4.86816100 | 5.42259800 | 2.47282800  |
| H | -5.54953100 | 5.23539300 | 0.85944000  |

INT-15' -2

0 imaginary frequency

H = -5393.954029

G = -5394.166062

E(M06-2X-DCM) = -5394.881768

|   |             |            |             |
|---|-------------|------------|-------------|
| C | -3.96031100 | 2.58701600 | 0.72528300  |
| C | -3.80419400 | 3.11484100 | -0.74575300 |
| H | -3.03544800 | 2.50220900 | -1.22781100 |
| H | -4.73636800 | 2.91522600 | -1.28673200 |
| C | -3.42509200 | 4.57441400 | -0.96972500 |
| C | -2.78506200 | 3.13042200 | 1.58186100  |
| H | -2.92469000 | 2.86806100 | 2.63893200  |
| H | -2.78167000 | 4.21951700 | 1.53450000  |
| N | -1.47586800 | 2.67666800 | 1.13507700  |
| C | -0.33258000 | 3.39262700 | 1.31011000  |
| N | 0.77820800  | 2.70796700 | 0.85605300  |
| C | 2.13796400  | 3.04547800 | 0.80683000  |
| C | 2.73338400  | 4.12106400 | 1.48775900  |
| C | 2.95900600  | 2.20677800 | 0.02830500  |
| C | 4.10519600  | 4.34538800 | 1.37108500  |
| C | 4.32711600  | 2.44857900 | -0.06870400 |
| H | 2.51821300  | 1.37906000 | -0.51872800 |
| C | 4.91885000  | 3.52219400 | 0.59757200  |
| H | 5.98217200  | 3.70941600 | 0.51552000  |
| C | 5.19793300  | 1.50753600 | -0.85133800 |
| C | 4.70550100  | 5.54645700 | 2.05691100  |
| F | 5.63370000  | 0.47363400 | -0.08617500 |
| F | 6.29601100  | 2.11504200 | -1.34464600 |
| F | 4.54095500  | 0.95296800 | -1.90396800 |
| F | 4.62149500  | 6.65303600 | 1.28347300  |
| F | 6.01717400  | 5.36033100 | 2.33340400  |
| F | 4.08257600  | 5.82869700 | 3.21969200  |
| S | -0.32352100 | 4.93879900 | 1.98936200  |
| H | 2.12214800  | 4.77473800 | 2.09206000  |
| C | -2.19258500 | 4.86423400 | -1.42039800 |
| H | 0.58184600  | 1.77073500 | 0.50545100  |
| H | -1.38697500 | 1.68893900 | 0.90640900  |

|   |             |             |             |
|---|-------------|-------------|-------------|
| H | -2.15826400 | -1.55626400 | -0.74110600 |
| O | 1.09951100  | -0.91554700 | -1.48545100 |
| O | 0.76915700  | -2.60927600 | 0.44080100  |
| P | 0.10420900  | -1.33798200 | -0.28926000 |
| O | -0.22262900 | -0.12125600 | 0.49272100  |
| C | 1.72132900  | -3.57572400 | -4.65324800 |
| C | 2.36632500  | -3.77380500 | -3.43803600 |
| C | 2.26788300  | -2.82138400 | -2.41054500 |
| C | 0.73909700  | -1.50638300 | -3.80083100 |
| C | 0.95345400  | -2.42526900 | -4.84012800 |
| C | 2.07093600  | -2.53752500 | 0.98642800  |
| C | 3.16679300  | -2.71722300 | 0.14626600  |
| C | 4.45352300  | -2.54855400 | 0.68790000  |
| C | 4.63124500  | -2.28039200 | 2.04051100  |
| C | 3.51508300  | -2.18960000 | 2.87147800  |
| C | 2.21044700  | -2.31010600 | 2.36852800  |
| H | 0.47364800  | -2.24296200 | -5.79705000 |
| H | 3.64131700  | -2.01020700 | 3.93505000  |
| C | 3.27373100  | -3.16109900 | -1.31284300 |
| C | 3.31176100  | -4.71815300 | -1.45906900 |
| H | 4.21284000  | -5.15669500 | -1.01924200 |
| H | 2.44056100  | -5.14335600 | -0.94807900 |
| H | 6.28388900  | -1.92224000 | -0.31050700 |
| H | 6.01024300  | -3.66532800 | -0.31506000 |
| C | 1.38372300  | -1.76259700 | -2.57592900 |
| H | 1.80980500  | -4.30603000 | -5.45338700 |
| H | 5.62881500  | -2.14762000 | 2.45061900  |
| C | 3.19161800  | -4.95843500 | -2.98202700 |
| H | 4.17755000  | -4.97767200 | -3.46607400 |
| H | 2.70490400  | -5.91097500 | -3.21859200 |
| C | 5.50851700  | -2.69001100 | -0.38450500 |
| C | 4.68018100  | -2.56961900 | -1.67750300 |
| H | 5.13261600  | -3.07708400 | -2.53412900 |
| H | 4.56503900  | -1.51314100 | -1.93614800 |
| C | 1.04605000  | -2.25614500 | 3.31197000  |
| C | 0.44670400  | -3.46898000 | 3.73133400  |
| C | 0.60654600  | -1.02105400 | 3.84318700  |
| C | 0.91430800  | -4.75409200 | 3.30727700  |
| C | -0.66559400 | -3.43328100 | 4.65344600  |
| C | -0.50103800 | -1.00075600 | 4.77369700  |
| C | 0.31729300  | -5.91001700 | 3.73922100  |
| H | 1.76353800  | -4.80700300 | 2.63497900  |
| C | -1.26960300 | -4.66137000 | 5.06753800  |
| C | -1.11487900 | -2.20176900 | 5.13882700  |

|   |             |             |             |
|---|-------------|-------------|-------------|
| C | -0.79639000 | -5.86738700 | 4.62523800  |
| H | 0.69744900  | -6.87150300 | 3.40454200  |
| H | -2.11087700 | -4.61407900 | 5.75511700  |
| H | -1.94755200 | -2.18001800 | 5.83945900  |
| H | -1.25959700 | -6.79381200 | 4.95347400  |
| C | -0.12347400 | -0.30141400 | -4.01681900 |
| C | 0.46455600  | 0.98900800  | -4.02865200 |
| C | -1.51209200 | -0.45231300 | -4.25898200 |
| C | 1.86663600  | 1.20839100  | -3.83969800 |
| C | -0.36486300 | 2.14997900  | -4.26016700 |
| C | -2.32879200 | 0.72039600  | -4.48519100 |
| C | 2.40316600  | 2.46983200  | -3.86022000 |
| H | 2.51757400  | 0.35600100  | -3.68456100 |
| C | 0.23413100  | 3.44872800  | -4.27461500 |
| C | -1.73602800 | 1.98535200  | -4.47422500 |
| C | 1.57884000  | 3.60945900  | -4.07780000 |
| H | 3.46982600  | 2.59936200  | -3.70588600 |
| H | -0.40851300 | 4.30782000  | -4.45058200 |
| H | -2.35585200 | 2.86427500  | -4.63812900 |
| H | 2.02220300  | 4.60110000  | -4.08928200 |
| C | 0.78510100  | 1.40506000  | 4.06964300  |
| H | 1.27060000  | 2.34099600  | 3.81121200  |
| C | 1.22103000  | 0.23012900  | 3.51532300  |
| H | 2.05127900  | 0.23886800  | 2.81782200  |
| C | -0.31263700 | 1.42043200  | 4.97717100  |
| H | -0.64515700 | 2.36570200  | 5.39639300  |
| C | -0.93730600 | 0.25001600  | 5.31368200  |
| H | -1.77155800 | 0.24550200  | 6.01160000  |
| C | -3.51686300 | -1.83409500 | -4.49664400 |
| H | -3.98302500 | -2.81484400 | -4.48770500 |
| C | -4.31382500 | -0.67612500 | -4.72359500 |
| H | -5.38021300 | -0.78217500 | -4.90342100 |
| C | -3.73198200 | 0.56329100  | -4.71565200 |
| H | -4.32590400 | 1.45750700  | -4.88997500 |
| C | -2.16844200 | -1.72557000 | -4.27394000 |
| H | -1.58218000 | -2.62014100 | -4.10111600 |
| N | -1.29660600 | -2.09713000 | -0.86853400 |
| S | -1.62931800 | -3.71455900 | -1.22462500 |
| C | -1.59727700 | -4.62138200 | 0.44314000  |
| O | -0.54565200 | -4.28624300 | -2.00835800 |
| O | -3.02090400 | -3.74056200 | -1.65682300 |
| F | -1.81615100 | -3.77140400 | 1.44322700  |
| F | -2.56973100 | -5.53183500 | 0.41288000  |
| F | -0.42663900 | -5.22729600 | 0.59326200  |



|   |             |             |             |
|---|-------------|-------------|-------------|
| C | -4.00594200 | 1.04540300  | 0.75069500  |
| C | -4.35664800 | 0.28801900  | -0.37909200 |
| C | -3.77922200 | 0.34216100  | 1.94749500  |
| C | -4.50826800 | -1.10056900 | -0.31023200 |
| H | -4.52818800 | 0.77173800  | -1.33376600 |
| C | -3.91452200 | -1.04413300 | 2.02067100  |
| H | -3.48824500 | 0.87630100  | 2.84656400  |
| C | -4.29411700 | -1.77449100 | 0.89408300  |
| H | -4.79048500 | -1.65376000 | -1.20136500 |
| H | -3.71478000 | -1.55209900 | 2.96024500  |
| H | -4.40969700 | -2.85297800 | 0.94565800  |
| C | -5.26480400 | 3.11385100  | 1.44708600  |
| H | -5.09548700 | 2.99698100  | 2.52375500  |
| H | -5.33479600 | 4.19279200  | 1.26917500  |
| C | -6.60395100 | 2.46449700  | 1.13045100  |
| C | -7.19262600 | 1.70103800  | 2.06620800  |
| H | -6.65630000 | 1.56276500  | 3.00586900  |
| C | -1.59454800 | 6.21065000  | -1.71209900 |
| H | -1.11366200 | 6.22015500  | -2.69962900 |
| H | -2.32013000 | 7.02804400  | -1.68196800 |
| H | -0.81138700 | 6.43589800  | -0.97583100 |
| C | -8.50615000 | 0.97430000  | 2.00044800  |
| H | -8.34905100 | -0.11061600 | 2.07706700  |
| H | -9.15101900 | 1.25599400  | 2.84401600  |
| H | -9.06185400 | 1.15975800  | 1.07761500  |
| C | -7.23416400 | 2.75808800  | -0.21188000 |
| H | -6.75836800 | 2.18741500  | -1.02004800 |
| H | -8.29932400 | 2.51457300  | -0.23324700 |
| H | -7.13351100 | 3.81935100  | -0.46965900 |
| H | -1.50505600 | 4.03146100  | -1.56710200 |
| C | -4.48063600 | 5.63577900  | -0.74203300 |
| H | -4.56199000 | 5.92540500  | 0.31419500  |
| H | -4.26903500 | 6.55053500  | -1.30205900 |
| H | -5.47080400 | 5.28186700  | -1.05310900 |

INT-15<sup>7</sup>-3

0 imaginary frequency

H = -5393.940183

G = -5394.152082

E(M06-2X-DCM) = -5394.874673

|   |             |             |             |
|---|-------------|-------------|-------------|
| O | -1.21914800 | -2.76608200 | -0.26919700 |
| O | -2.94185700 | -0.86990300 | 0.12204100  |
| P | -1.33563900 | -1.17326900 | 0.11493200  |
| O | -0.72230700 | -0.29513900 | -0.93535400 |

|   |             |             |             |
|---|-------------|-------------|-------------|
| C | -2.64705200 | -3.89256300 | -4.04505400 |
| C | -3.51339800 | -3.76973200 | -2.96399100 |
| C | -3.02088000 | -3.47314900 | -1.68428300 |
| C | -0.75861500 | -3.33936500 | -2.58709900 |
| C | -1.27990400 | -3.71123800 | -3.83885900 |
| C | -3.78220400 | -1.56293900 | 0.99741100  |
| C | -4.20853400 | -2.84804200 | 0.66059300  |
| C | -4.91883200 | -3.60412200 | 1.60661200  |
| C | -5.29706300 | -3.04722400 | 2.82286900  |
| C | -4.96910900 | -1.71854200 | 3.08695800  |
| C | -4.20131200 | -0.95058600 | 2.19513800  |
| H | -0.58820600 | -3.83704200 | -4.66669600 |
| H | -5.29250000 | -1.25580100 | 4.01461500  |
| C | -4.13503900 | -3.61849300 | -0.65495600 |
| C | -5.38194200 | -3.31753900 | -1.55438200 |
| H | -5.50168800 | -2.23107000 | -1.63631900 |
| H | -6.30739900 | -3.72479800 | -1.13566300 |
| H | -6.21033700 | -5.14982900 | 0.80133700  |
| H | -4.94234900 | -5.77129900 | 1.85242400  |
| C | -1.66633000 | -3.18957700 | -1.52017400 |
| H | -3.02252200 | -4.13582300 | -5.03591100 |
| H | -5.85120100 | -3.62988700 | 3.55446500  |
| C | -5.02010800 | -3.90702400 | -2.93503000 |
| H | -5.50592500 | -3.37666100 | -3.76213400 |
| H | -5.32563300 | -4.95981500 | -3.01418400 |
| C | -5.16119500 | -5.00801200 | 1.09693400  |
| C | -4.21709200 | -5.08836900 | -0.12116500 |
| H | -3.21790700 | -5.39921700 | 0.20489900  |
| H | -4.55297000 | -5.79348600 | -0.88797700 |
| C | -3.93172700 | 0.48046800  | 2.54313000  |
| C | -3.14038400 | 0.79723200  | 3.67391500  |
| C | -4.58356800 | 1.51080400  | 1.81918800  |
| C | -2.43456200 | -0.19521800 | 4.42690100  |
| C | -3.01619500 | 2.17415100  | 4.09764600  |
| C | -4.43325600 | 2.88554500  | 2.24234400  |
| C | -1.68836400 | 0.14149400  | 5.52469600  |
| H | -2.46260300 | -1.22371100 | 4.09090900  |
| C | -2.23759400 | 2.48086100  | 5.25797900  |
| C | -3.66120200 | 3.17816900  | 3.37068400  |
| C | -1.59565100 | 1.49482000  | 5.95636300  |
| H | -1.13950100 | -0.62976800 | 6.05695600  |
| H | -2.16587300 | 3.52056200  | 5.56941900  |
| H | -3.57034500 | 4.21245300  | 3.69786000  |
| H | -1.00101000 | 1.74066000  | 6.83204300  |

|   |              |              |              |
|---|--------------|--------------|--------------|
| C | 0. 71951900  | -3. 15981300 | -2. 44551700 |
| C | 1. 37910800  | -2. 14668000 | -3. 18541700 |
| C | 1. 47133300  | -4. 06441200 | -1. 65491900 |
| C | 0. 67740000  | -1. 18301400 | -3. 98012400 |
| C | 2. 82121300  | -2. 05728300 | -3. 14987200 |
| C | 2. 91115600  | -3. 94440300 | -1. 60541800 |
| C | 1. 34485600  | -0. 23364700 | -4. 71084100 |
| H | -0. 40508700 | -1. 21088500 | -3. 99401600 |
| C | 3. 48013200  | -1. 05203700 | -3. 92606500 |
| C | 3. 54722600  | -2. 95517800 | -2. 36208200 |
| C | 2. 76785800  | -0. 16897800 | -4. 69299700 |
| H | 0. 78252700  | 0. 47691500  | -5. 31167800 |
| H | 4. 56654300  | -1. 01116400 | -3. 89740800 |
| H | 4. 63174900  | -2. 88060300 | -2. 33200400 |
| H | 3. 28350800  | 0. 57864900  | -5. 29065000 |
| C | -6. 06135500 | 2. 27472300  | 0. 02425100  |
| H | -6. 70174100 | 2. 04799700  | -0. 82405500 |
| C | -5. 43124100 | 1. 25700500  | 0. 69302100  |
| H | -5. 58105400 | 0. 23286900  | 0. 37143300  |
| C | -5. 89355900 | 3. 62830800  | 0. 43402900  |
| H | -6. 40302100 | 4. 42268900  | -0. 10486800 |
| C | -5. 10335000 | 3. 91903800  | 1. 51422300  |
| H | -4. 98169100 | 4. 94615700  | 1. 85182700  |
| C | 1. 62940700  | -5. 98654100 | -0. 15466200 |
| H | 1. 14595300  | -6. 78388700 | 0. 40326300  |
| C | 3. 04422800  | -5. 84437300 | -0. 08815700 |
| H | 3. 62591000  | -6. 52729000 | 0. 52489000  |
| C | 3. 66520100  | -4. 85366900 | -0. 79844300 |
| H | 4. 74360200  | -4. 73051900 | -0. 75668000 |
| C | 0. 87266800  | -5. 13118800 | -0. 91135900 |
| H | -0. 20215700 | -5. 26136200 | -0. 95316500 |
| C | -1. 00965900 | 3. 52041700  | -1. 31518400 |
| C | -0. 78216200 | 3. 41827800  | 0. 22283500  |
| H | -1. 70428000 | 3. 73453200  | 0. 72808100  |
| H | -0. 72573200 | 2. 34931300  | 0. 46498700  |
| C | 0. 38782300  | 4. 10092200  | 0. 92021200  |
| C | 0. 24115500  | 2. 99022400  | -2. 08602300 |
| H | 0. 96848200  | 3. 79424800  | -2. 15735100 |
| H | -0. 05309400 | 2. 68863800  | -3. 09661900 |
| N | 0. 91311200  | 1. 85438700  | -1. 43636800 |
| C | 2. 20125100  | 1. 77348600  | -1. 15035600 |
| N | 2. 65733300  | 0. 85088500  | -0. 29434300 |
| C | 4. 00118200  | 0. 69512100  | 0. 15035500  |
| C | 4. 72028100  | 1. 77980600  | 0. 66171300  |

|   |              |              |              |
|---|--------------|--------------|--------------|
| C | 4. 56158800  | -0. 58414900 | 0. 15405200  |
| C | 6. 02862500  | 1. 59196900  | 1. 10649400  |
| C | 5. 86457400  | -0. 75878500 | 0. 62177500  |
| H | 3. 97565600  | -1. 42760800 | -0. 19243400 |
| C | 6. 60949100  | 0. 32439100  | 1. 08678200  |
| H | 7. 61872000  | 0. 17905700  | 1. 45128800  |
| C | 6. 46136500  | -2. 14389700 | 0. 59621700  |
| C | 6. 82758900  | 2. 77836900  | 1. 58282000  |
| F | 7. 67404300  | -2. 18695700 | 1. 18245900  |
| F | 6. 61990000  | -2. 58747800 | -0. 67905600 |
| F | 5. 66947600  | -3. 03773600 | 1. 21958300  |
| F | 6. 03773800  | 3. 72019500  | 2. 14087900  |
| F | 7. 48421900  | 3. 36962000  | 0. 55817500  |
| F | 7. 75481800  | 2. 42322000  | 2. 49535100  |
| S | 3. 41501300  | 2. 83435600  | -1. 91948400 |
| H | 4. 25532200  | 2. 75530000  | 0. 75218200  |
| H | 2. 00359400  | 0. 15102700  | 0. 11082600  |
| H | 0. 31067000  | 1. 05186800  | -1. 14957800 |
| C | 1. 13191800  | 5. 07729600  | 0. 37450800  |
| H | 0. 88069400  | 5. 41524600  | -0. 62798600 |
| H | 2. 69380000  | 3. 02255900  | -3. 04041600 |
| N | -0. 87321300 | -1. 06282900 | 1. 65587400  |
| S | 0. 62456200  | -1. 13866900 | 2. 15090800  |
| O | 0. 93441600  | -0. 13567300 | 3. 17416200  |
| O | 1. 62031200  | -1. 29371000 | 1. 04624300  |
| C | 0. 70527800  | -2. 77855500 | 3. 04161200  |
| F | 0. 39526800  | -3. 77848200 | 2. 21362400  |
| F | -0. 15614400 | -2. 78294800 | 4. 06910300  |
| F | 1. 94048200  | -2. 96934200 | 3. 51639700  |
| C | -1. 31580600 | 4. 95886100  | -1. 77918500 |
| C | -0. 84420700 | 5. 48081500  | -2. 99507600 |
| C | -2. 15892600 | 5. 78180500  | -1. 01294200 |
| C | -1. 18385800 | 6. 76833600  | -3. 41906000 |
| H | -0. 21593400 | 4. 88242400  | -3. 64650000 |
| C | -2. 50102800 | 7. 06611400  | -1. 43208300 |
| H | -2. 56516900 | 5. 41687900  | -0. 07562300 |
| C | -2. 01262500 | 7. 57105900  | -2. 63840600 |
| H | -0. 79962300 | 7. 13722100  | -4. 36668300 |
| H | -3. 15207400 | 7. 67511400  | -0. 81010300 |
| H | -2. 27698900 | 8. 57316900  | -2. 96466300 |
| C | -2. 26889600 | 2. 61208100  | -1. 61589400 |
| H | -2. 04033800 | 1. 60651900  | -1. 25309200 |
| H | -3. 08290400 | 2. 99062300  | -0. 98653300 |
| C | -2. 76065100 | 2. 51236300  | -3. 05283100 |

|   |             |            |             |
|---|-------------|------------|-------------|
| C | -2.33575200 | 1.49190400 | -3.82041000 |
| H | -1.65401300 | 0.77731200 | -3.35835800 |
| C | -3.79592400 | 3.52441000 | -3.48852000 |
| H | -4.66085400 | 3.48016800 | -2.81251800 |
| H | -3.41570300 | 4.54975300 | -3.44020700 |
| H | -4.15960600 | 3.34918900 | -4.50407000 |
| C | 0.57538200  | 3.57966800 | 2.32878100  |
| H | 1.35305100  | 4.10847700 | 2.88395300  |
| H | -0.35970200 | 3.67285700 | 2.89696800  |
| H | 0.81943500  | 2.50917800 | 2.33959900  |
| C | 2.28148700  | 5.82823000 | 0.99170100  |
| H | 2.55607500  | 5.46780900 | 1.98611400  |
| H | 3.17522900  | 5.76387800 | 0.35529900  |
| H | 2.04407700  | 6.89766600 | 1.07987700  |
| C | -2.71285100 | 1.16152800 | -5.23855100 |
| H | -3.19574300 | 0.17574600 | -5.29109300 |
| H | -3.39134700 | 1.88998600 | -5.68993300 |
| H | -1.82152600 | 1.10060600 | -5.87920000 |

INT-15' -4

0 imaginary frequency

H = -5393.945293

G = -5394.155970

E(M06-2X-DCM) = -5394.878338

|   |             |             |             |
|---|-------------|-------------|-------------|
| O | -0.56293600 | -2.88696500 | -0.46530800 |
| O | -2.63689800 | -1.36686700 | -0.10575000 |
| P | -1.00349300 | -1.36632000 | -0.03951800 |
| O | -0.52296100 | -0.34816300 | -1.03360500 |
| C | -1.49276100 | -4.01326700 | -4.38944900 |
| C | -2.43569400 | -4.12700200 | -3.37281000 |
| C | -2.09053100 | -3.82803600 | -2.04701900 |
| C | 0.16080100  | -3.21476000 | -2.76575500 |
| C | -0.20078300 | -3.59441100 | -4.07094300 |
| C | -3.37093300 | -2.26728000 | 0.67061200  |
| C | -3.51504900 | -3.58654000 | 0.23757700  |
| C | -4.11428000 | -4.52438400 | 1.09385900  |
| C | -4.65762600 | -4.13203500 | 2.31186800  |
| C | -4.61472800 | -2.78492800 | 2.66703800  |
| C | -3.97065000 | -1.82637100 | 1.86692900  |
| H | 0.55309000  | -3.53432800 | -4.85035300 |
| H | -5.07397100 | -2.45464300 | 3.59409500  |
| C | -3.21701400 | -4.24371800 | -1.10911700 |
| C | -4.44044300 | -4.12558100 | -2.08048600 |
| H | -4.76178000 | -3.07814200 | -2.11448700 |

|   |             |             |             |
|---|-------------|-------------|-------------|
| H | -5.29429600 | -4.72659200 | -1.75252900 |
| H | -5.03753700 | -6.22957600 | 0.12348800  |
| H | -3.73382000 | -6.66832400 | 1.22208600  |
| C | -0.82854900 | -3.30976100 | -1.76761400 |
| H | -1.74917700 | -4.25635200 | -5.41763500 |
| H | -5.12315800 | -4.85792700 | 2.97376300  |
| C | -3.88753500 | -4.54541500 | -3.46074700 |
| H | -4.41471700 | -4.06261300 | -4.29163000 |
| H | -3.98088900 | -5.62934500 | -3.61691500 |
| C | -4.05294800 | -5.91253200 | 0.49534000  |
| C | -3.04541100 | -5.73386100 | -0.65932800 |
| H | -2.02484300 | -5.87099000 | -0.28398600 |
| H | -3.19595100 | -6.43835500 | -1.48330000 |
| C | -4.02999800 | -0.39248700 | 2.29781500  |
| C | -3.36017200 | 0.02659100  | 3.47241400  |
| C | -4.87947800 | 0.50659600  | 1.60435800  |
| C | -2.46906400 | -0.82646000 | 4.19871500  |
| C | -3.56062100 | 1.36900500  | 3.97156300  |
| C | -5.05998800 | 1.85053500  | 2.10733200  |
| C | -1.83904500 | -0.39511300 | 5.33569600  |
| H | -2.26376400 | -1.81597100 | 3.81221500  |
| C | -2.89592100 | 1.77409000  | 5.17214000  |
| C | -4.40250000 | 2.24200700  | 3.27752500  |
| C | -2.06132300 | 0.91823300  | 5.83832100  |
| H | -1.14358900 | -1.05445800 | 5.84616600  |
| H | -3.07029800 | 2.78210800  | 5.54212000  |
| H | -4.55999500 | 3.24760800  | 3.66378600  |
| H | -1.55610900 | 1.23949900  | 6.74520100  |
| C | 1.56498900  | -2.77091000 | -2.50071100 |
| C | 2.07651600  | -1.62274100 | -3.15628400 |
| C | 2.41408900  | -3.55157700 | -1.67615100 |
| C | 1.26475500  | -0.75938000 | -3.96287100 |
| C | 3.47330300  | -1.27811800 | -3.01296800 |
| C | 3.79596500  | -3.16418200 | -1.50286500 |
| C | 1.79654500  | 0.32377300  | -4.61410800 |
| H | 0.20570200  | -0.97080200 | -4.04618300 |
| C | 3.99465000  | -0.15153100 | -3.72708800 |
| C | 4.29145800  | -2.04840000 | -2.18273000 |
| C | 3.18452100  | 0.62768900  | -4.50971100 |
| H | 1.15398900  | 0.95817000  | -5.21950600 |
| H | 5.05607500  | 0.06642500  | -3.63342700 |
| H | 5.33609600  | -1.76935000 | -2.06124200 |
| H | 3.59413000  | 1.47606400  | -5.05184600 |
| C | -6.44273100 | 1.02432700  | -0.20606200 |

|   |             |             |             |
|---|-------------|-------------|-------------|
| H | -6.98841700 | 0.71197600  | -1.09237800 |
| C | -5.61381500 | 0.13742400  | 0.43135300  |
| H | -5.51295000 | -0.87108500 | 0.04728700  |
| C | -6.60444600 | 2.35113200  | 0.28550800  |
| H | -7.27042600 | 3.03947700  | -0.22801100 |
| C | -5.93208100 | 2.74655400  | 1.41153000  |
| H | -6.06173500 | 3.75026700  | 1.81110800  |
| C | 2.81999100  | -5.46796100 | -0.21436100 |
| H | 2.45574500  | -6.36423300 | 0.28049600  |
| C | 4.17175600  | -5.06451800 | -0.02516600 |
| H | 4.82460400  | -5.65026800 | 0.61617900  |
| C | 4.64299800  | -3.94709700 | -0.65816400 |
| H | 5.67625500  | -3.63197000 | -0.53367500 |
| C | 1.97608000  | -4.74213700 | -1.01315500 |
| H | 0.95388300  | -5.07399900 | -1.15051300 |
| C | -1.75911500 | 3.49015700  | -1.08283900 |
| C | -1.65818000 | 3.46248200  | 0.47166000  |
| H | -2.66366500 | 3.60160700  | 0.88936800  |
| H | -1.40393100 | 2.43423900  | 0.75376300  |
| C | -0.71694800 | 4.38794900  | 1.23653400  |
| C | -0.35985600 | 3.23372900  | -1.71387900 |
| H | 0.22284000  | 4.15033600  | -1.75155600 |
| H | -0.49396700 | 2.88436300  | -2.74329600 |
| N | 0.44671700  | 2.21606100  | -1.02387300 |
| C | 1.69214100  | 2.33953500  | -0.59383900 |
| N | 2.37908800  | 1.26524300  | -0.19141600 |
| C | 3.72824300  | 1.27793300  | 0.29406000  |
| C | 4.77250700  | 1.41783900  | -0.61514700 |
| C | 3.98258300  | 1.07626100  | 1.65352600  |
| C | 6.09255500  | 1.36504500  | -0.16146400 |
| C | 5.30566600  | 1.03707800  | 2.09190800  |
| H | 3.15816200  | 0.94404100  | 2.34665000  |
| C | 6.36479900  | 1.17892600  | 1.19088500  |
| H | 7.38873600  | 1.14513800  | 1.54273700  |
| C | 5.60273900  | 0.78170800  | 3.54930600  |
| C | 7.19951200  | 1.45647500  | -1.17680200 |
| F | 5.71407000  | -0.53851800 | 3.80695600  |
| F | 4.63435800  | 1.26835100  | 4.34884500  |
| F | 6.76997200  | 1.35676800  | 3.92117600  |
| F | 8.41730800  | 1.52358800  | -0.60703200 |
| F | 7.05562400  | 2.53832300  | -1.97288500 |
| F | 7.19892700  | 0.37294000  | -1.99891900 |
| S | 2.53530100  | 3.90808400  | -0.50234400 |
| H | 4.55290600  | 1.53669100  | -1.67064600 |

|   |             |             |             |
|---|-------------|-------------|-------------|
| H | 1.91421500  | 0.34694100  | -0.12461100 |
| H | 0.05591400  | 1.24870200  | -1.01416400 |
| C | -0.33858800 | 5.60835800  | 0.80201500  |
| H | -0.72016500 | 5.94697500  | -0.15833900 |
| H | 1.41600100  | 4.56751100  | -0.07692000 |
| N | -0.63283600 | -1.21951200 | 1.52442600  |
| S | 0.86022700  | -1.14737500 | 2.04702500  |
| O | 1.04732600  | -0.09715200 | 3.06085400  |
| O | 1.88627200  | -1.21815900 | 0.97069200  |
| C | 1.07372100  | -2.75440200 | 2.97630100  |
| F | 0.19186400  | -2.83047200 | 3.98489900  |
| F | 2.30902000  | -2.81249700 | 3.48338000  |
| F | 0.88521800  | -3.79352400 | 2.16041800  |
| C | -2.34468600 | 4.81058100  | -1.61952400 |
| C | -1.83021100 | 5.47176000  | -2.74655100 |
| C | -3.48525000 | 5.36654000  | -1.01340900 |
| C | -2.41660900 | 6.64252200  | -3.23621200 |
| H | -0.96878800 | 5.07721600  | -3.27462100 |
| C | -4.07222000 | 6.53356000  | -1.49778600 |
| H | -3.93459700 | 4.87681700  | -0.15518500 |
| C | -3.53919000 | 7.18292300  | -2.61315000 |
| H | -1.99058100 | 7.12655000  | -4.11125900 |
| H | -4.95141400 | 6.93600900  | -1.00115600 |
| H | -3.99520100 | 8.09373300  | -2.99126900 |
| C | -2.73890600 | 2.30706100  | -1.46372600 |
| H | -2.30960300 | 1.38408500  | -1.06353300 |
| H | -3.66989100 | 2.47668900  | -0.91022200 |
| C | -3.06978600 | 2.08988900  | -2.93458300 |
| C | -2.38190500 | 1.16546600  | -3.63013600 |
| H | -1.61542000 | 0.60693200  | -3.09315600 |
| C | -4.23895100 | 2.86877200  | -3.49547400 |
| H | -4.03832700 | 3.94414800  | -3.54265500 |
| H | -4.51995700 | 2.53865700  | -4.49861700 |
| H | -5.11558700 | 2.74280000  | -2.84603900 |
| C | -0.32512700 | 3.81048700  | 2.57781700  |
| H | 0.28572000  | 4.48384900  | 3.18216400  |
| H | -1.22362200 | 3.56024900  | 3.15715300  |
| H | 0.21897700  | 2.86344300  | 2.46189700  |
| C | 0.49564700  | 6.63427600  | 1.52583200  |
| H | 1.30710500  | 7.00794900  | 0.88587000  |
| H | -0.11599800 | 7.51002500  | 1.78292700  |
| H | 0.94525300  | 6.26132200  | 2.44896300  |
| C | -2.55560000 | 0.75035700  | -5.06524400 |
| H | -2.78227600 | -0.32283200 | -5.13057900 |



|   |             |            |             |
|---|-------------|------------|-------------|
| H | -3.34769700 | 1.29400900 | -5.58668500 |
| H | -1.62551000 | 0.90187900 | -5.63151700 |

INT-15-1

0 imaginary frequency

H = -5393.936641

G = -5394.148943

E(M06-2X-DCM) = -5394.877499

|   |             |             |             |
|---|-------------|-------------|-------------|
| O | -0.62640600 | -2.46058100 | -1.02478900 |
| O | -2.68111100 | -1.02663900 | -0.33339700 |
| P | -1.05200300 | -1.10373800 | -0.20219200 |
| O | -0.48598100 | 0.13443300  | -0.82889600 |
| C | -1.35513100 | -2.40680800 | -5.14924400 |
| C | -2.36546600 | -2.73407200 | -4.25114400 |
| C | -2.09032200 | -2.83980600 | -2.88057700 |
| C | 0.23129900  | -2.21521700 | -3.28953600 |
| C | -0.06566200 | -2.19149400 | -4.66484100 |
| C | -3.47500700 | -2.08585900 | 0.11471200  |
| C | -3.63320100 | -3.21286500 | -0.69384900 |
| C | -4.30330200 | -4.33555100 | -0.18154000 |
| C | -4.89576200 | -4.30011200 | 1.07529500  |
| C | -4.83455300 | -3.12047400 | 1.81444100  |
| C | -4.12744800 | -1.99454100 | 1.36047300  |
| H | 0.74159900  | -1.98021100 | -5.35969100 |
| H | -5.33241700 | -3.05832200 | 2.77762200  |
| C | -3.28405800 | -3.45237400 | -2.16026800 |
| C | -4.44304800 | -2.99005300 | -3.10615800 |
| H | -4.71763500 | -1.96129600 | -2.84527300 |
| H | -5.33838700 | -3.61174600 | -3.00664400 |
| H | -5.23200600 | -5.62770300 | -1.65381600 |
| H | -4.00213200 | -6.43606700 | -0.68774400 |
| C | -0.82661700 | -2.49840500 | -2.40373700 |
| H | -1.55654200 | -2.33647700 | -6.21538500 |
| H | -5.41442200 | -5.16927300 | 1.47196400  |
| C | -3.82665500 | -3.02113800 | -4.52266300 |
| H | -4.28062700 | -2.28578800 | -5.19718300 |
| H | -3.95904200 | -4.00416500 | -4.99603700 |
| C | -4.25769400 | -5.48337000 | -1.16563600 |
| C | -3.18715100 | -5.01596600 | -2.17251300 |
| H | -2.19260100 | -5.30711700 | -1.81554900 |
| H | -3.31739500 | -5.43466800 | -3.17528900 |
| C | -4.18965100 | -0.74838100 | 2.18855500  |
| C | -3.57023500 | -0.70351700 | 3.46015100  |
| C | -5.00196000 | 0.32923200  | 1.75427200  |

|   |             |             |             |
|---|-------------|-------------|-------------|
| C | -2.72441700 | -1.75217600 | 3.94404400  |
| C | -3.77803600 | 0.44217600  | 4.31742300  |
| C | -5.19094400 | 1.47360600  | 2.61690500  |
| C | -2.14108400 | -1.68156500 | 5.18107100  |
| H | -2.51513600 | -2.59392000 | 3.29712300  |
| C | -3.15965700 | 0.47018500  | 5.60695400  |
| C | -4.58006000 | 1.49608400  | 3.87347400  |
| C | -2.36694700 | -0.56144900 | 6.03061400  |
| H | -1.47813100 | -2.47734900 | 5.50709500  |
| H | -3.33271100 | 1.33636400  | 6.24167800  |
| H | -4.73650000 | 2.35450400  | 4.52380700  |
| H | -1.89601800 | -0.52566600 | 7.00935600  |
| C | 1.64929700  | -2.00182300 | -2.86333700 |
| C | 2.30758000  | -0.79175400 | -3.19798000 |
| C | 2.37652300  | -3.05553700 | -2.25240600 |
| C | 1.62013300  | 0.33742200  | -3.75216700 |
| C | 3.73012100  | -0.66295800 | -2.97618500 |
| C | 3.78414300  | -2.88256600 | -1.97130400 |
| C | 2.29507500  | 1.47139200  | -4.12575900 |
| H | 0.54254000  | 0.29333300  | -3.85460600 |
| C | 4.40035600  | 0.52874100  | -3.40220500 |
| C | 4.42642000  | -1.70203800 | -2.35427600 |
| C | 3.70813600  | 1.56531900  | -3.97041900 |
| H | 1.74764000  | 2.31019300  | -4.54835700 |
| H | 5.47679800  | 0.58986800  | -3.26069200 |
| H | 5.49064100  | -1.58725400 | -2.16104200 |
| H | 4.23039900  | 2.46067900  | -4.29798300 |
| C | -6.47945900 | 1.38300500  | 0.11154200  |
| H | -6.99585500 | 1.34957200  | -0.84449900 |
| C | -5.69022000 | 0.32962100  | 0.49758600  |
| H | -5.58833700 | -0.53061700 | -0.15414700 |
| C | -6.64243800 | 2.51824500  | 0.95661100  |
| H | -7.27267400 | 3.34366100  | 0.63617700  |
| C | -6.01707700 | 2.55434600  | 2.17427800  |
| H | -6.14435300 | 3.40700500  | 2.83749500  |
| C | 2.52021100  | -5.31020100 | -1.31882900 |
| H | 2.04380800  | -6.25510800 | -1.07188300 |
| C | 3.89706300  | -5.11986700 | -1.01323700 |
| H | 4.45756600  | -5.91587200 | -0.53065600 |
| C | 4.50857400  | -3.94010400 | -1.33809700 |
| H | 5.56338400  | -3.78357500 | -1.12515800 |
| C | 1.79070600  | -4.31858700 | -1.92028000 |
| H | 0.74653500  | -4.49070000 | -2.15108200 |
| C | -1.63169300 | 3.71468100  | -0.65238200 |

|   |             |             |             |
|---|-------------|-------------|-------------|
| C | -2.24820900 | 2.98284400  | 0.59987000  |
| H | -3.33395500 | 3.08989500  | 0.52682000  |
| H | -2.04319000 | 1.91239100  | 0.50161900  |
| C | -1.83149100 | 3.45358400  | 1.99160300  |
| C | -0.10761700 | 3.87371500  | -0.48645800 |
| H | 0.06023900  | 4.44238700  | 0.43363100  |
| H | 0.29190400  | 4.45717900  | -1.32323000 |
| N | 0.62799000  | 2.60190200  | -0.39231800 |
| C | 1.87242000  | 2.48247400  | 0.03995400  |
| N | 2.41584600  | 1.29044200  | 0.29735000  |
| C | 3.74424400  | 1.08784000  | 0.80162600  |
| C | 3.90931100  | 0.63122800  | 2.11309000  |
| C | 4.84457700  | 1.29134000  | -0.02813800 |
| C | 5.19890700  | 0.39537100  | 2.58912900  |
| C | 6.12858900  | 1.05088900  | 0.46486400  |
| H | 4.69559900  | 1.61697500  | -1.05111700 |
| C | 6.31187400  | 0.60503800  | 1.77190300  |
| H | 7.30977800  | 0.42702900  | 2.15391200  |
| C | 7.30092200  | 1.22573100  | -0.46351200 |
| C | 5.39166700  | -0.13828000 | 3.98779600  |
| F | 8.47601900  | 1.24629300  | 0.19413800  |
| F | 7.20471700  | 2.37137600  | -1.17361500 |
| F | 7.36953600  | 0.21674000  | -1.37154100 |
| F | 4.43939900  | 0.31218800  | 4.82725200  |
| F | 6.59192600  | 0.23021900  | 4.49283200  |
| F | 5.34877400  | -1.48605200 | 4.01302300  |
| S | 2.91737200  | 3.88745600  | 0.35941700  |
| H | 3.04199600  | 0.44850100  | 2.73904900  |
| H | 1.83351900  | 0.43622800  | 0.28138700  |
| H | 0.12169500  | 1.71109100  | -0.59523300 |
| C | -2.53311500 | 4.42599900  | 2.60227300  |
| H | -3.38746200 | 4.83949700  | 2.06485600  |
| H | 2.10655200  | 4.79308800  | -0.21557300 |
| N | -0.76842000 | -1.43498400 | 1.35408800  |
| S | 0.69360400  | -1.55154600 | 1.94793200  |
| O | 0.83870000  | -0.85231900 | 3.23296900  |
| O | 1.77410400  | -1.32361700 | 0.94671500  |
| C | 0.84797800  | -3.36504400 | 2.37129700  |
| F | -0.07810800 | -3.70871800 | 3.27978800  |
| F | 2.05920100  | -3.60065600 | 2.88580700  |
| F | 0.68087700  | -4.11769100 | 1.28173100  |
| C | -2.00233300 | 2.97397800  | -1.95260200 |
| C | -3.25134500 | 2.34518000  | -2.08727600 |
| C | -1.15847500 | 2.97025300  | -3.07396100 |

|   |             |            |             |
|---|-------------|------------|-------------|
| C | -3.63702600 | 1.74384800 | -3.28486700 |
| H | -3.94191000 | 2.30575700 | -1.25309000 |
| C | -1.54185400 | 2.37086700 | -4.27543600 |
| H | -0.17989000 | 3.43526100 | -3.02972600 |
| C | -2.78562000 | 1.75322300 | -4.38921400 |
| H | -4.60959300 | 1.26240500 | -3.34741400 |
| H | -0.86201500 | 2.38979000 | -5.12368700 |
| H | -3.08397200 | 1.28266900 | -5.32203400 |
| C | -2.24622800 | 5.16836800 | -0.70281800 |
| H | -3.31965400 | 5.03024900 | -0.87166800 |
| H | -2.14199700 | 5.59529700 | 0.30094900  |
| C | -1.69758600 | 6.16398900 | -1.71706200 |
| C | -2.16363000 | 6.17353200 | -2.97709200 |
| H | -2.92383800 | 5.43457200 | -3.22868600 |
| C | -0.69710000 | 2.70894900 | 2.66476500  |
| H | 0.28917700  | 2.99946500 | 2.27950200  |
| H | -0.67525700 | 2.87431800 | 3.74396000  |
| H | -0.79187700 | 1.62827400 | 2.50883700  |
| C | -0.69792900 | 7.16523700 | -1.17947900 |
| H | -0.29321500 | 7.82495500 | -1.95039100 |
| H | -1.16691300 | 7.79906600 | -0.41385300 |
| H | 0.15251700  | 6.67713300 | -0.68423400 |
| C | -2.32084300 | 5.02291000 | 3.96582300  |
| H | -3.20073200 | 4.86160900 | 4.60434400  |
| H | -1.45107800 | 4.61585300 | 4.48681300  |
| H | -2.18626200 | 6.11128100 | 3.89645700  |
| C | -1.78468800 | 7.07627000 | -4.11688000 |
| H | -1.44528700 | 6.48466500 | -4.97788700 |
| H | -2.65468800 | 7.65199900 | -4.46176400 |
| H | -0.99365300 | 7.78877500 | -3.86840900 |

INT-15-2

0 imaginary frequency

H = -5393.936636

G = -5394.149180

E(M06-2X-DCM) = -5394.877445

|   |             |             |             |
|---|-------------|-------------|-------------|
| O | -0.64000800 | -2.47644800 | -0.98896700 |
| O | -2.68972300 | -1.02276000 | -0.32447200 |
| P | -1.06132900 | -1.10558800 | -0.18743600 |
| O | -0.48714000 | 0.12049100  | -0.83012500 |
| C | -1.35973600 | -2.48167300 | -5.11544200 |
| C | -2.37346900 | -2.79063900 | -4.21472000 |
| C | -2.10173400 | -2.87692800 | -2.84210700 |
| C | 0.22357300  | -2.26921200 | -3.25531100 |

|   |             |             |             |
|---|-------------|-------------|-------------|
| C | -0.07035800 | -2.26501400 | -4.63149100 |
| C | -3.48982200 | -2.07114600 | 0.13788000  |
| C | -3.65124300 | -3.20974400 | -0.65364800 |
| C | -4.32778400 | -4.32136600 | -0.12597700 |
| C | -4.92331800 | -4.26391400 | 1.12859500  |
| C | -4.85859800 | -3.07332200 | 1.84962500  |
| C | -4.14510100 | -1.95771900 | 1.38033000  |
| H | 0.73934200  | -2.06804100 | -5.32769600 |
| H | -5.35868300 | -2.99406000 | 2.81039500  |
| C | -3.29987900 | -3.47306700 | -2.11537700 |
| C | -4.45468200 | -3.01975900 | -3.07071700 |
| H | -4.72514200 | -1.98595700 | -2.82597200 |
| H | -5.35306100 | -3.63582500 | -2.96387000 |
| H | -5.25898800 | -5.63169500 | -1.58047500 |
| H | -4.03492600 | -6.43069000 | -0.59936200 |
| C | -0.83749900 | -2.53410600 | -2.36759300 |
| H | -1.55853000 | -2.42654400 | -6.18296600 |
| H | -5.44702800 | -5.12447600 | 1.53719600  |
| C | -3.83536900 | -3.07495800 | -4.48519000 |
| H | -4.28439600 | -2.34769600 | -5.17167900 |
| H | -3.97127700 | -4.06434700 | -4.94409500 |
| C | -4.28512400 | -5.48426900 | -1.09233200 |
| C | -3.21022500 | -5.03710700 | -2.10377000 |
| H | -2.21781700 | -5.32746300 | -1.74024700 |
| H | -3.34025600 | -5.47029300 | -3.10040000 |
| C | -4.20386000 | -0.69884400 | 2.18920200  |
| C | -3.58812200 | -0.63768700 | 3.46191300  |
| C | -5.00980800 | 0.37584700  | 1.73624800  |
| C | -2.74892300 | -1.68295800 | 3.96428300  |
| C | -3.79316600 | 0.52172600  | 4.30121000  |
| C | -5.19587000 | 1.53406000  | 2.58090000  |
| C | -2.16936600 | -1.59661400 | 5.20209100  |
| H | -2.54157900 | -2.53525900 | 3.33069400  |
| C | -3.17888100 | 0.56613900  | 5.59222800  |
| C | -4.58869100 | 1.57265100  | 3.83887600  |
| C | -2.39264100 | -0.46284000 | 6.03401200  |
| H | -1.51132200 | -2.39056500 | 5.54222200  |
| H | -3.34977800 | 1.44260300  | 6.21326300  |
| H | -4.74305100 | 2.44150500  | 4.47570500  |
| H | -1.92483000 | -0.41464900 | 7.01371800  |
| C | 1.64185500  | -2.05588500 | -2.83001200 |
| C | 2.30653100  | -0.85464900 | -3.18343200 |
| C | 2.36328800  | -3.10316800 | -2.20136700 |
| C | 1.62497400  | 0.26917200  | -3.75548900 |

|   |              |              |              |
|---|--------------|--------------|--------------|
| C | 3. 72967200  | -0. 72972900 | -2. 96339100 |
| C | 3. 77176900  | -2. 93306800 | -1. 92278100 |
| C | 2. 30580400  | 1. 39357800  | -4. 14685900 |
| H | 0. 54716000  | 0. 22904200  | -3. 85713300 |
| C | 4. 40614100  | 0. 45152100  | -3. 40823300 |
| C | 4. 42044500  | -1. 76243300 | -2. 32490400 |
| C | 3. 71935700  | 1. 48252000  | -3. 99294400 |
| H | 1. 76280100  | 2. 22850900  | -4. 58266500 |
| H | 5. 48286000  | 0. 50942500  | -3. 26762000 |
| H | 5. 48531900  | -1. 65042700 | -2. 13376400 |
| H | 4. 24632600  | 2. 36978700  | -4. 33467600 |
| C | -6. 47789800 | 1. 41135100  | 0. 07359900  |
| H | -6. 99189700 | 1. 36573300  | -0. 88323200 |
| C | -5. 69461700 | 0. 36033200  | 0. 47778700  |
| H | -5. 59494800 | -0. 51014300 | -0. 16055800 |
| C | -6. 63773200 | 2. 56014400  | 0. 90076100  |
| H | -7. 26311500 | 3. 38356000  | 0. 56600000  |
| C | -6. 01551800 | 2. 61187800  | 2. 11948000  |
| H | -6. 14056000 | 3. 47514500  | 2. 76926900  |
| C | 2. 49471600  | -5. 34279000 | -1. 23043400 |
| H | 2. 01319100  | -6. 28087600 | -0. 96793000 |
| C | 3. 87258000  | -5. 15486600 | -0. 92789300 |
| H | 4. 42881200  | -5. 94590900 | -0. 43235800 |
| C | 4. 49047200  | -3. 98395400 | -1. 27216600 |
| H | 5. 54619900  | -3. 82973800 | -1. 06202200 |
| C | 1. 77067200  | -4. 35740000 | -1. 84849600 |
| H | 0. 72564800  | -4. 52771900 | -2. 07667300 |
| C | -1. 61128500 | 3. 70722500  | -0. 69835400 |
| C | -2. 23102700 | 2. 99575100  | 0. 56402600  |
| H | -3. 31633200 | 3. 10511500  | 0. 48868100  |
| H | -2. 02934200 | 1. 92333800  | 0. 48143700  |
| C | -1. 81394600 | 3. 48558700  | 1. 94912100  |
| C | -0. 08639500 | 3. 86068900  | -0. 53523200 |
| H | 0. 08460800  | 4. 44126700  | 0. 37680100  |
| H | 0. 31532300  | 4. 43052400  | -1. 38033900 |
| N | 0. 64368200  | 2. 58695700  | -0. 42376000 |
| C | 1. 88851600  | 2. 46883900  | 0. 00801800  |
| N | 2. 42718500  | 1. 27839800  | 0. 28242600  |
| C | 3. 75696200  | 1. 07645100  | 0. 78301400  |
| C | 3. 92503400  | 0. 62070000  | 2. 09446400  |
| C | 4. 85503600  | 1. 27225100  | -0. 05171500 |
| C | 5. 21505800  | 0. 37701000  | 2. 56482800  |
| C | 6. 13966200  | 1. 02383900  | 0. 43585000  |
| H | 4. 70378500  | 1. 59216800  | -1. 07607700 |

|   |              |              |              |
|---|--------------|--------------|--------------|
| C | 6. 32578500  | 0. 57687300  | 1. 74201500  |
| H | 7. 32316300  | 0. 37631600  | 2. 11450200  |
| C | 7. 30880200  | 1. 17516100  | -0. 50062400 |
| C | 5. 42054000  | -0. 05179000 | 3. 99700200  |
| F | 7. 38163400  | 0. 13842800  | -1. 37650700 |
| F | 8. 48507300  | 1. 22220500  | 0. 15380900  |
| F | 7. 20509600  | 2. 29744000  | -1. 24589700 |
| F | 5. 57939400  | 1. 02138400  | 4. 80718600  |
| F | 6. 53066300  | -0. 81156600 | 4. 13032400  |
| F | 4. 37699900  | -0. 75641500 | 4. 46536900  |
| S | 2. 93934900  | 3. 87447000  | 0. 30498300  |
| H | 3. 05885400  | 0. 43370500  | 2. 72059600  |
| H | 1. 83980800  | 0. 42721900  | 0. 28476100  |
| H | 0. 13326400  | 1. 69571600  | -0. 61419800 |
| C | -2. 51246300 | 4. 46982400  | 2. 54425200  |
| H | -3. 36450200 | 4. 87839500  | 1. 99942700  |
| H | 2. 13009200  | 4. 77494900  | -0. 28012900 |
| N | -0. 78423400 | -1. 41630600 | 1. 37415300  |
| S | 0. 67449200  | -1. 52457100 | 1. 97701800  |
| O | 0. 81466300  | -0. 80317500 | 3. 25006800  |
| O | 1. 76044700  | -1. 31658400 | 0. 97711200  |
| C | 0. 82337300  | -3. 33092400 | 2. 43155700  |
| F | 0. 65787100  | -4. 10147300 | 1. 35431200  |
| F | -0. 10602900 | -3. 65719800 | 3. 34297900  |
| F | 2. 03266200  | -3. 56087400 | 2. 95356500  |
| C | -1. 98680500 | 2. 95106800  | -1. 98815300 |
| C | -3. 24278500 | 2. 33490200  | -2. 11632900 |
| C | -1. 14054900 | 2. 92054700  | -3. 10721100 |
| C | -3. 63281400 | 1. 72000800  | -3. 30555600 |
| H | -3. 93581300 | 2. 31661400  | -1. 28344900 |
| C | -1. 52825600 | 2. 30753300  | -4. 30041800 |
| H | -0. 15657700 | 3. 37450200  | -3. 06760700 |
| C | -2. 77885600 | 1. 70274100  | -4. 40786500 |
| H | -4. 61084700 | 1. 24913700  | -3. 36314600 |
| H | -0. 84636400 | 2. 30570500  | -5. 14722700 |
| H | -3. 08064000 | 1. 22172900  | -5. 33422600 |
| C | -2. 21777200 | 5. 16344100  | -0. 76883800 |
| H | -3. 29212800 | 5. 02910900  | -0. 93480400 |
| H | -2. 11021900 | 5. 60418800  | 0. 22855700  |
| C | -1. 66409400 | 6. 14108700  | -1. 79782500 |
| C | -2. 12915500 | 6. 13365500  | -3. 05822900 |
| H | -2. 89261400 | 5. 39453900  | -3. 29926700 |
| C | -0. 68402000 | 2. 74576800  | 2. 63453200  |
| H | -0. 65338700 | 2. 93821400  | 3. 70898700  |

|   |             |            |             |
|---|-------------|------------|-------------|
| H | -0.79190200 | 1.66260000 | 2.50642900  |
| H | 0.30290300  | 3.01465500 | 2.23573500  |
| C | -0.66003800 | 7.14555400 | -1.27465700 |
| H | -1.12671400 | 7.79371200 | -0.51969200 |
| H | 0.18714500  | 6.66081600 | -0.77056200 |
| H | -0.25081700 | 7.79097700 | -2.05522900 |
| C | -2.30020300 | 5.08660000 | 3.89894300  |
| H | -3.18044700 | 4.93532700 | 4.53945200  |
| H | -1.43099300 | 4.68672100 | 4.42634600  |
| H | -2.16493300 | 6.17372800 | 3.81350100  |
| C | -1.74512200 | 7.01722100 | -4.21126600 |
| H | -2.61247100 | 7.59071900 | -4.56636700 |
| H | -0.95183000 | 7.73057900 | -3.97264300 |
| H | -1.40665100 | 6.41107700 | -5.06248300 |

INT-15-3

0 imaginary frequency

H = -5472.495245

G = -5472.714677

E(M06-2X-DCM) = -5473.486173

|   |             |            |             |
|---|-------------|------------|-------------|
| O | -0.33064700 | 2.68290400 | -0.98245300 |
| O | 2.00634400  | 1.89876600 | -0.17840900 |
| P | 0.41482200  | 1.51099300 | -0.10503900 |
| O | 0.25339600  | 0.15239300 | -0.72124600 |
| C | 0.67391500  | 2.98467100 | -5.03767700 |
| C | 1.45739400  | 3.59439100 | -4.06270000 |
| C | 1.07310100  | 3.55522700 | -2.71451600 |
| C | -0.88691500 | 2.22926000 | -3.30537700 |
| C | -0.50279100 | 2.34253400 | -4.65393100 |
| C | 2.43617200  | 3.12503000 | 0.34285700  |
| C | 2.28446200  | 4.28527600 | -0.41692200 |
| C | 2.54680700  | 5.53097500 | 0.17578900  |
| C | 3.06052500  | 5.61147000 | 1.46484000  |
| C | 3.33261900  | 4.43204400 | 2.15630400  |
| C | 3.02471800  | 3.17010900 | 1.62166900  |
| H | -1.14572400 | 1.89996300 | -5.40890400 |
| H | 3.78019700  | 4.47453500 | 3.14485000  |
| C | 1.95827300  | 4.48366700 | -1.89419100 |
| C | 3.25898000  | 4.47026800 | -2.76759500 |
| H | 3.84652800  | 3.58069900 | -2.51065500 |
| H | 3.89051700  | 5.34648700 | -2.59136600 |
| H | 3.08554200  | 7.13092900 | -1.18679200 |
| H | 1.61734500  | 7.45295200 | -0.27061300 |
| C | -0.04449800 | 2.81188900 | -2.33903600 |



|   |             |             |             |
|---|-------------|-------------|-------------|
| H | 0.95856000  | 3.02199900  | -6.08638300 |
| H | 3.26453700  | 6.57524200  | 1.92450800  |
| C | 2.75321000  | 4.36041600  | -4.22290600 |
| H | 3.46647700  | 3.85206800  | -4.88214500 |
| H | 2.57572200  | 5.35304200  | -4.66013600 |
| C | 2.18628500  | 6.65842500  | -0.76684300 |
| C | 1.36890100  | 5.93388800  | -1.85713800 |
| H | 0.31721500  | 5.87686500  | -1.55404700 |
| H | 1.40957800  | 6.42672600  | -2.83363800 |
| C | 3.42027000  | 1.95453000  | 2.40011200  |
| C | 2.79862000  | 1.66243400  | 3.63732200  |
| C | 4.52201500  | 1.18092600  | 1.95509500  |
| C | 1.66820900  | 2.39292300  | 4.12533900  |
| C | 3.30133300  | 0.57808600  | 4.45146800  |
| C | 5.01155600  | 0.09824300  | 2.77799900  |
| C | 1.08810000  | 2.08547000  | 5.32711600  |
| H | 1.24323000  | 3.17254300  | 3.50677000  |
| C | 2.67315300  | 0.29836400  | 5.70595700  |
| C | 4.39217100  | -0.17006900 | 4.00199800  |
| C | 1.60008100  | 1.03094300  | 6.13527200  |
| H | 0.21069400  | 2.63517700  | 5.65431400  |
| H | 3.06913200  | -0.51528500 | 6.30965700  |
| H | 4.77394600  | -0.97812300 | 4.62337200  |
| H | 1.12602800  | 0.80414300  | 7.08649600  |
| C | -2.18584400 | 1.56155000  | -2.98284200 |
| C | -2.38504100 | 0.20338600  | -3.33473300 |
| C | -3.25696700 | 2.31853100  | -2.44351500 |
| C | -1.32896900 | -0.63604300 | -3.81936300 |
| C | -3.69758400 | -0.38674800 | -3.19788100 |
| C | -4.54774600 | 1.69529000  | -2.25689300 |
| C | -1.56264000 | -1.93460600 | -4.19404100 |
| H | -0.32308300 | -0.23650200 | -3.87124400 |
| C | -3.90468500 | -1.73841800 | -3.62313200 |
| C | -4.73872100 | 0.36884500  | -2.65253700 |
| C | -2.87093900 | -2.49229200 | -4.11318600 |
| H | -0.73737700 | -2.54232400 | -4.55415300 |
| H | -4.90728900 | -2.15227900 | -3.54457000 |
| H | -5.71717100 | -0.08842000 | -2.52520700 |
| H | -3.04417100 | -3.51510800 | -4.43848100 |
| C | 6.28753400  | 0.68480800  | 0.33349100  |
| H | 6.79300800  | 0.91023400  | -0.60191100 |
| C | 5.21449200  | 1.44188200  | 0.72807100  |
| H | 4.88497000  | 2.26664000  | 0.10660600  |
| C | 6.75867300  | -0.38661400 | 1.14464500  |

|   |             |             |             |
|---|-------------|-------------|-------------|
| H | 7.61645800  | -0.97107800 | 0.82266600  |
| C | 6.13765700  | -0.66288400 | 2.33341300  |
| H | 6.49577700  | -1.46781900 | 2.97074700  |
| C | -4.19086700 | 4.39860800  | -1.56250400 |
| H | -4.06577200 | 5.44527300  | -1.29865800 |
| C | -5.45043500 | 3.76991100  | -1.35296500 |
| H | -6.27245300 | 4.33811600  | -0.92627600 |
| C | -5.62070100 | 2.45719200  | -1.69786200 |
| H | -6.58007000 | 1.96518600  | -1.55641000 |
| C | -3.13759000 | 3.70131400  | -2.09294700 |
| H | -2.19154800 | 4.20441700  | -2.25188600 |
| C | 2.45961200  | -3.12692700 | -0.98391800 |
| C | 2.90436100  | -2.33244200 | 0.29855100  |
| H | 3.96778500  | -2.10474800 | 0.20034300  |
| H | 2.39631200  | -1.36430200 | 0.29104100  |
| C | 2.62777100  | -2.97398500 | 1.65841100  |
| C | 0.99605100  | -3.63178700 | -0.80664400 |
| H | 0.98555600  | -4.29920000 | 0.06093600  |
| H | 0.71646100  | -4.21100000 | -1.69486300 |
| N | -0.01303100 | -2.58341700 | -0.60030000 |
| C | -1.23894500 | -2.79542600 | -0.14889300 |
| N | -2.06059700 | -1.78804600 | 0.15674700  |
| C | -3.39000100 | -1.95949200 | 0.67505600  |
| C | -4.40855300 | -2.40833300 | -0.16255400 |
| C | -3.65070700 | -1.63187000 | 2.00901600  |
| C | -5.70108800 | -2.55462700 | 0.34650500  |
| C | -4.94810800 | -1.77602600 | 2.49886800  |
| H | -2.85866700 | -1.24650900 | 2.64235100  |
| C | -5.97584800 | -2.24127400 | 1.67535300  |
| H | -6.97866200 | -2.35622800 | 2.06782200  |
| C | -5.25246400 | -1.37731800 | 3.92248400  |
| C | -6.78016400 | -3.07121100 | -0.56746800 |
| F | -5.52632100 | -0.06125500 | 4.02054100  |
| F | -4.21539500 | -1.63715800 | 4.74229600  |
| F | -6.32915600 | -2.04460600 | 4.40036100  |
| F | -6.54846800 | -4.35240700 | -0.93176000 |
| F | -6.84329800 | -2.35237200 | -1.71873000 |
| F | -7.99979300 | -3.02493600 | 0.00108300  |
| S | -1.89929700 | -4.42487300 | 0.12849300  |
| H | -4.19154000 | -2.62808600 | -1.20170600 |
| H | -1.71943300 | -0.81629300 | 0.11331500  |
| H | 0.24140300  | -1.58827100 | -0.75615100 |
| C | 3.50051900  | -3.77201300 | 2.31313900  |
| H | -0.87982100 | -5.08639200 | -0.44561100 |

|   |             |             |             |
|---|-------------|-------------|-------------|
| N | -0.02364000 | 1.76732600  | 1.42446500  |
| S | -1.48932700 | 1.45807100  | 1.94548600  |
| O | -1.49160200 | 0.75994500  | 3.23879500  |
| O | -2.39738500 | 0.92264300  | 0.89686200  |
| C | -2.16468000 | 3.15689900  | 2.32719800  |
| F | -2.16649600 | 3.92055700  | 1.23150200  |
| F | -1.41313500 | 3.75082500  | 3.26722100  |
| F | -3.41587100 | 3.04812100  | 2.78578300  |
| C | 2.53251200  | -2.28390300 | -2.27652600 |
| C | 2.84884400  | -0.91958100 | -2.28929400 |
| C | 2.27147000  | -2.90158900 | -3.51384500 |
| C | 2.90196200  | -0.20276400 | -3.48797100 |
| H | 3.05967700  | -0.38863400 | -1.37018800 |
| C | 2.33038900  | -2.19203100 | -4.71197000 |
| H | 2.03691200  | -3.96208500 | -3.55466500 |
| C | 2.64534800  | -0.83104500 | -4.70425000 |
| H | 3.13442000  | 0.85768300  | -3.45899300 |
| H | 2.13487900  | -2.70420900 | -5.65079300 |
| H | 2.68700200  | -0.27036700 | -5.63401600 |
| C | 3.26196500  | -4.46471200 | -1.13032500 |
| H | 3.19907800  | -4.95689800 | -0.15147200 |
| H | 2.68550800  | -5.11853900 | -1.80083200 |
| C | 4.72187900  | -4.51486900 | -1.60688800 |
| C | 5.29951700  | -5.73577500 | -1.67417000 |
| C | 1.31804600  | -2.56671900 | 2.32826500  |
| H | 1.46890100  | -2.30568000 | 3.37986100  |
| H | 0.88796500  | -1.68187100 | 1.85305600  |
| H | 0.55354700  | -3.35760000 | 2.30545400  |
| C | 5.44507400  | -3.24992200 | -2.01954000 |
| H | 5.13812700  | -2.91298900 | -3.01677100 |
| H | 5.24534200  | -2.41682000 | -1.34102400 |
| H | 6.52744400  | -3.38986000 | -2.03709300 |
| C | 3.18536600  | -4.36776200 | 3.67078400  |
| H | 3.67236200  | -3.79326300 | 4.47303700  |
| H | 2.11754000  | -4.40643800 | 3.89502800  |
| H | 3.57828100  | -5.39032700 | 3.74048900  |
| C | 6.70277100  | -6.01216200 | -2.16493100 |
| H | 6.67579300  | -6.70701400 | -3.01646500 |
| H | 7.25058900  | -5.12600600 | -2.48767600 |
| H | 7.29588500  | -6.50837900 | -1.38350200 |
| C | 4.89068300  | -4.12722300 | 1.84148200  |
| H | 4.97195800  | -5.19638000 | 1.60058200  |
| H | 5.22172400  | -3.56616600 | 0.96815800  |
| H | 5.61166500  | -3.94191000 | 2.65002900  |

|   |            |             |             |
|---|------------|-------------|-------------|
| C | 4.54963500 | -6.99511500 | -1.27407200 |
| H | 3.69217600 | -7.19389500 | -1.93342400 |
| H | 5.20177700 | -7.87285600 | -1.32220800 |
| H | 4.15127900 | -6.94059200 | -0.25235600 |

TS-EF-6SS

l imaginary frequency

H = -5393.927348

G = -5394.136040

E(M06-2X-DCM) = -5394.854232

|   |             |             |             |
|---|-------------|-------------|-------------|
| O | -0.77228900 | -2.93509400 | -0.04408200 |
| O | -2.73270900 | -1.25529300 | 0.23761400  |
| P | -1.09810800 | -1.33627400 | 0.12502400  |
| O | -0.70546300 | -0.52767900 | -1.07495000 |
| C | -2.11120900 | -4.64139700 | -3.62630700 |
| C | -2.96745700 | -4.50897200 | -2.53792200 |
| C | -2.48922400 | -4.02305200 | -1.31254000 |
| C | -0.27254700 | -3.73054500 | -2.28748500 |
| C | -0.76950500 | -4.28860700 | -3.47852900 |
| C | -3.41953900 | -1.97543500 | 1.21486600  |
| C | -3.67819200 | -3.33266500 | 1.01290600  |
| C | -4.23935500 | -4.08587100 | 2.05673900  |
| C | -4.63442500 | -3.47764400 | 3.24259100  |
| C | -4.48048600 | -2.09936000 | 3.37601400  |
| C | -3.87067300 | -1.31985500 | 2.37827400  |
| H | -0.08135500 | -4.42507800 | -4.30760400 |
| H | -4.82498600 | -1.60161200 | 4.27764700  |
| C | -3.54811600 | -4.20548200 | -0.23344400 |
| C | -4.84564100 | -4.15119900 | -1.10879800 |
| H | -5.10633300 | -3.10128100 | -1.28603700 |
| H | -5.70033900 | -4.62993800 | -0.62057000 |
| H | -5.35180500 | -5.84441700 | 1.45066300  |
| H | -3.97516400 | -6.20794200 | 2.48618200  |
| C | -1.17769000 | -3.56420300 | -1.22222100 |
| H | -2.47252900 | -5.02657700 | -4.57661100 |
| H | -5.07092100 | -4.06049600 | 4.04968500  |
| C | -4.44566800 | -4.82130900 | -2.44282900 |
| H | -5.01277000 | -4.43266300 | -3.29655500 |
| H | -4.62342500 | -5.90554400 | -2.41548900 |
| C | -4.31835600 | -5.54881800 | 1.68059600  |
| C | -3.42017300 | -5.61932400 | 0.42878700  |
| H | -2.37752900 | -5.77145100 | 0.73038600  |
| H | -3.69029600 | -6.42746400 | -0.25794000 |
| C | -3.81867200 | 0.16227800  | 2.59126500  |

|   |             |             |             |
|---|-------------|-------------|-------------|
| C | -3.04021000 | 0.69921000  | 3.64551600  |
| C | -4.67479100 | 1.00732800  | 1.83993100  |
| C | -2.11990200 | -0.09304600 | 4.40377000  |
| C | -3.15397100 | 2.10175100  | 3.98018300  |
| C | -4.75829700 | 2.41410900  | 2.16707800  |
| C | -1.38854400 | 0.44909000  | 5.42723800  |
| H | -1.97440600 | -1.12897700 | 4.12754300  |
| C | -2.38910000 | 2.62291700  | 5.07212600  |
| C | -4.00686000 | 2.91980100  | 3.23279100  |
| C | -1.53347200 | 1.82117600  | 5.77850000  |
| H | -0.67377700 | -0.16900500 | 5.96179200  |
| H | -2.50303300 | 3.67476000  | 5.32552500  |
| H | -4.10021300 | 3.97217000  | 3.49625300  |
| H | -0.95281600 | 2.22978900  | 6.60116700  |
| C | 1.18079100  | -3.39160500 | -2.18912200 |
| C | 1.73441200  | -2.39793900 | -3.03330900 |
| C | 2.01864200  | -4.13163600 | -1.31689600 |
| C | 0.93810600  | -1.58219700 | -3.90128900 |
| C | 3.16214200  | -2.17085300 | -3.02939100 |
| C | 3.43859600  | -3.86582000 | -1.29649700 |
| C | 1.50804100  | -0.64140900 | -4.71989500 |
| H | -0.13743200 | -1.71015500 | -3.89282500 |
| C | 3.71780600  | -1.18237400 | -3.90314900 |
| C | 3.97412900  | -2.91065500 | -2.16468700 |
| C | 2.91799200  | -0.43930600 | -4.72886300 |
| H | 0.87734400  | -0.03749500 | -5.36738500 |
| H | 4.79458400  | -1.03003900 | -3.88522200 |
| H | 5.04742200  | -2.73760400 | -2.16501600 |
| H | 3.35187500  | 0.30991400  | -5.38560600 |
| C | -6.33160700 | 1.36692600  | 0.07513000  |
| H | -6.94690300 | 0.97206600  | -0.72845900 |
| C | -5.50607200 | 0.52706500  | 0.77696300  |
| H | -5.47928200 | -0.52734400 | 0.52851700  |
| C | -6.39652700 | 2.75403700  | 0.39077000  |
| H | -7.06191400 | 3.40431300  | -0.17075300 |
| C | -5.63353800 | 3.25732600  | 1.41095900  |
| H | -5.69165500 | 4.31014200  | 1.67972300  |
| C | 2.36960600  | -5.85272900 | 0.38256700  |
| H | 1.96860600  | -6.62999000 | 1.02772400  |
| C | 3.76212300  | -5.56000700 | 0.42232500  |
| H | 4.40855100  | -6.10636800 | 1.10376700  |
| C | 4.27913400  | -4.59617800 | -0.39956200 |
| H | 5.33862500  | -4.35486500 | -0.38031400 |
| C | 1.53104800  | -5.16665700 | -0.45638100 |

|   |             |             |             |
|---|-------------|-------------|-------------|
| H | 0.47542800  | -5.41100900 | -0.47393600 |
| C | -1.68390200 | 3.13531600  | -1.55558900 |
| C | -1.52947700 | 3.16401700  | -0.00487600 |
| H | -2.46844600 | 3.52356100  | 0.44374100  |
| H | -1.45452100 | 2.13329700  | 0.35812300  |
| C | -0.45533000 | 3.96579500  | 0.67029600  |
| C | -0.30760200 | 2.76424700  | -2.20908200 |
| H | 0.24672500  | 3.66274600  | -2.46934300 |
| H | -0.47844400 | 2.21156100  | -3.13557400 |
| N | 0.58340500  | 1.95993200  | -1.37017100 |
| C | 1.87833600  | 2.24709400  | -1.13063800 |
| N | 2.61624200  | 1.26841800  | -0.56800900 |
| C | 3.96437800  | 1.33814900  | -0.11421600 |
| C | 4.41960600  | 2.33753200  | 0.75116800  |
| C | 4.82111200  | 0.30648800  | -0.49464400 |
| C | 5.74031500  | 2.31557200  | 1.19333600  |
| C | 6.13987800  | 0.28905400  | -0.03489800 |
| H | 4.45151700  | -0.47828000 | -1.14419700 |
| C | 6.61122300  | 1.29489500  | 0.80388100  |
| H | 7.63471200  | 1.28168900  | 1.15799300  |
| C | 7.03301000  | -0.84947600 | -0.45048600 |
| C | 6.25094300  | 3.43019300  | 2.06824400  |
| F | 6.66899300  | -2.01391100 | 0.13549800  |
| F | 8.32498900  | -0.62906700 | -0.13649600 |
| F | 6.97370700  | -1.06119600 | -1.79087100 |
| F | 6.81759000  | 4.41680800  | 1.33573100  |
| F | 7.19250400  | 2.99516900  | 2.93366400  |
| F | 5.26108800  | 3.99722900  | 2.79252200  |
| S | 2.55573900  | 3.80671300  | -1.48132800 |
| H | 3.74932000  | 3.11778100  | 1.08300600  |
| H | 2.17280800  | 0.36122100  | -0.36802400 |
| H | 0.24812300  | 0.99815100  | -1.18172300 |
| C | 0.16821400  | 5.07522000  | 0.06274900  |
| H | -0.38798000 | 5.47979700  | -0.78552100 |
| H | 1.08774900  | 4.49805200  | -0.56576100 |
| N | -0.55710700 | -0.92899100 | 1.59281400  |
| S | 0.98232200  | -0.78599900 | 1.93973100  |
| O | 1.25161500  | 0.43255400  | 2.72117900  |
| O | 1.90087300  | -1.07245100 | 0.80514700  |
| C | 1.29485100  | -2.19565800 | 3.12545600  |
| F | 0.50671700  | -2.08188600 | 4.20645700  |
| F | 2.57019100  | -2.16835400 | 3.52307200  |
| F | 1.04364900  | -3.36336700 | 2.53180200  |
| C | -2.21374200 | 4.46579700  | -2.13080000 |

|   |             |            |             |
|---|-------------|------------|-------------|
| C | -1.76734400 | 4.98136600 | -3.35849900 |
| C | -3.24384700 | 5.16775900 | -1.47983500 |
| C | -2.29614400 | 6.15898800 | -3.89234500 |
| H | -1.00216800 | 4.46479300 | -3.92753200 |
| C | -3.77446800 | 6.34404900 | -2.00859900 |
| H | -3.66340500 | 4.78976800 | -0.55218300 |
| C | -3.29807500 | 6.85268800 | -3.21743200 |
| H | -1.92073700 | 6.52774500 | -4.84325100 |
| H | -4.56579300 | 6.86155200 | -1.47228100 |
| H | -3.70794700 | 7.77063100 | -3.62951500 |
| C | -2.77817500 | 2.02481000 | -1.82540000 |
| H | -2.40784500 | 1.08615100 | -1.40126000 |
| H | -3.65905300 | 2.31106500 | -1.24128100 |
| C | -3.20900100 | 1.77967300 | -3.26274900 |
| C | -4.32324100 | 2.36438200 | -3.73233500 |
| H | -4.86975800 | 3.02535700 | -3.05930400 |
| C | -2.38164800 | 0.80879100 | -4.08764100 |
| H | -1.79880100 | 0.14718700 | -3.43961200 |
| H | -3.01162800 | 0.17843300 | -4.72416500 |
| H | -1.67649800 | 1.32135900 | -4.75841000 |
| C | -0.07353100 | 3.48510500 | 2.02591500  |
| H | 0.44221500  | 2.51248700 | 1.96984000  |
| H | 0.55377200  | 4.18476100 | 2.57842700  |
| H | -0.97856700 | 3.27323800 | 2.61060300  |
| C | 0.92348400  | 6.13780300 | 0.86081100  |
| H | 1.43228900  | 6.81490200 | 0.16852400  |
| H | 0.23667100  | 6.73466000 | 1.47132000  |
| H | 1.68501200  | 5.70853500 | 1.51692300  |
| C | -4.91730500 | 2.23552500 | -5.10616900 |
| H | -4.91040700 | 3.20557700 | -5.62309000 |
| H | -4.38184900 | 1.52240700 | -5.73888300 |
| H | -5.96842100 | 1.91980300 | -5.05413400 |

TS-EF-6SS-1

l imaginary frequency

H = -5393.926102

G = -5394.135507

E(M06-2X-DCM) = -5394.852547

|   |             |             |             |
|---|-------------|-------------|-------------|
| O | -0.91608700 | -2.70684800 | -0.63826500 |
| O | -2.79582000 | -1.19041700 | 0.32357300  |
| P | -1.18869200 | -1.21707700 | -0.00643700 |
| O | -0.92129400 | -0.10718900 | -0.97906900 |
| C | -2.77121500 | -3.58216200 | -4.28582600 |
| C | -3.45624100 | -3.73090400 | -3.08395500 |

|   |             |             |             |
|---|-------------|-------------|-------------|
| C | -2.80114100 | -3.51832600 | -1.86289500 |
| C | -0.75777100 | -2.92100100 | -3.05515500 |
| C | -1.42490600 | -3.21713500 | -4.25737500 |
| C | -3.35389100 | -2.13880900 | 1.18482400  |
| C | -3.63049200 | -3.42238800 | 0.70950200  |
| C | -4.03154800 | -4.41552400 | 1.61861900  |
| C | -4.25788800 | -4.11079500 | 2.95568500  |
| C | -4.10551100 | -2.79209000 | 3.38086700  |
| C | -3.65213600 | -1.78283300 | 2.51642100  |
| H | -0.86937400 | -3.13639400 | -5.18709200 |
| H | -4.32870400 | -2.52489100 | 4.40971300  |
| C | -3.68238100 | -3.98306000 | -0.71117600 |
| C | -5.09795700 | -3.78338400 | -1.35184400 |
| H | -5.38851600 | -2.73226000 | -1.24076400 |
| H | -5.86614900 | -4.39512700 | -0.86851200 |
| H | -5.20608700 | -6.03616900 | 0.78579300  |
| H | -3.68891500 | -6.56647100 | 1.50430000  |
| C | -1.49300700 | -3.04224700 | -1.85994400 |
| H | -3.26796500 | -3.75910400 | -5.23654200 |
| H | -4.56690900 | -4.88081700 | 3.65801200  |
| C | -4.90146400 | -4.11488400 | -2.84872700 |
| H | -5.59305800 | -3.56448800 | -3.49699500 |
| H | -5.06744500 | -5.18293400 | -3.04771000 |
| C | -4.15275700 | -5.75674800 | 0.92949000  |
| C | -3.44796400 | -5.50385400 | -0.41876300 |
| H | -2.37113700 | -5.67725600 | -0.31102300 |
| H | -3.81032200 | -6.14498700 | -1.22836400 |
| C | -3.60914900 | -0.37668100 | 3.03413400  |
| C | -2.63919900 | 0.01366000  | 3.98708500  |
| C | -4.64494100 | 0.51848500  | 2.66536900  |
| C | -1.58567700 | -0.85538600 | 4.41482700  |
| C | -2.69501100 | 1.33918900  | 4.56424600  |
| C | -4.68198800 | 1.84521200  | 3.23907300  |
| C | -0.66310000 | -0.45217300 | 5.34304300  |
| H | -1.50464600 | -1.83557600 | 3.96478200  |
| C | -1.71631500 | 1.71758900  | 5.53717600  |
| C | -3.70483600 | 2.22057200  | 4.16640700  |
| C | -0.73019100 | 0.84851500  | 5.91870100  |
| H | 0.14243100  | -1.12327300 | 5.62425700  |
| H | -1.77810900 | 2.71409200  | 5.96920800  |
| H | -3.74781600 | 3.21410400  | 4.60962100  |
| H | 0.00971300  | 1.14820700  | 6.65610000  |
| C | 0.68740800  | -2.53696600 | -3.08888200 |
| C | 1.09149300  | -1.36703700 | -3.78052700 |



|   |              |              |              |
|---|--------------|--------------|--------------|
| C | 1. 65990400  | -3. 38625800 | -2. 50297600 |
| C | 0. 16126000  | -0. 45484000 | -4. 37780700 |
| C | 2. 49888400  | -1. 05711200 | -3. 90231100 |
| C | 3. 06066500  | -3. 04213500 | -2. 59746400 |
| C | 0. 58717300  | 0. 64045500  | -5. 08586600 |
| H | -0. 89962300 | -0. 64051100 | -4. 26071400 |
| C | 2. 90023700  | 0. 10136700  | -4. 63965000 |
| C | 3. 44255400  | -1. 89701900 | -3. 30313800 |
| C | 1. 97645700  | 0. 92316100  | -5. 22706400 |
| H | -0. 14361000 | 1. 30147300  | -5. 54565600 |
| H | 3. 96381800  | 0. 31054500  | -4. 72813300 |
| H | 4. 50113300  | -1. 66057800 | -3. 39516900 |
| H | 2. 29665700  | 1. 79277300  | -5. 79480300 |
| C | -6. 71361200 | 1. 03053900  | 1. 46380600  |
| H | -7. 51139100 | 0. 72066300  | 0. 79394600  |
| C | -5. 70608200 | 0. 15426200  | 1. 77447000  |
| H | -5. 71354000 | -0. 84409300 | 1. 35205200  |
| C | -6. 73044700 | 2. 34423300  | 2. 01284100  |
| H | -7. 53546300 | 3. 02681600  | 1. 75383600  |
| C | -5. 74017400 | 2. 73575900  | 2. 87331100  |
| H | -5. 74914000 | 3. 73079100  | 3. 31297500  |
| C | 2. 29008000  | -5. 39509200 | -1. 26233300 |
| H | 2. 00449000  | -6. 31189400 | -0. 75366000 |
| C | 3. 66418100  | -5. 02985900 | -1. 32741000 |
| H | 4. 41305100  | -5. 66226900 | -0. 85866500 |
| C | 4. 03662900  | -3. 88844200 | -1. 98299600 |
| H | 5. 08155400  | -3. 59610100 | -2. 03948800 |
| C | 1. 32609900  | -4. 60506000 | -1. 83083600 |
| H | 0. 28697600  | -4. 90666400 | -1. 77533500 |
| C | -1. 22265400 | 3. 50254100  | -1. 71926000 |
| C | -1. 40415600 | 3. 25015400  | -0. 19966000 |
| H | -2. 37243900 | 3. 65540300  | 0. 12805300  |
| H | -1. 50072600 | 2. 17021600  | -0. 04783600 |
| C | -0. 39927500 | 3. 76812500  | 0. 79654400  |
| C | 0. 22412100  | 3. 05846600  | -2. 14864300 |
| H | 0. 88244300  | 3. 92016400  | -2. 23024400 |
| H | 0. 17663800  | 2. 58457000  | -3. 13479700 |
| N | 0. 88555800  | 2. 10510400  | -1. 25171300 |
| C | 2. 15473600  | 2. 23230700  | -0. 81651200 |
| N | 2. 76467800  | 1. 11944600  | -0. 37452500 |
| C | 4. 06272700  | 0. 98390000  | 0. 19544500  |
| C | 4. 51948800  | 1. 76804400  | 1. 25693400  |
| C | 4. 85887900  | -0. 04811400 | -0. 30286800 |
| C | 5. 79222200  | 1. 53965600  | 1. 77836200  |

|   |             |             |             |
|---|-------------|-------------|-------------|
| C | 6.12471100  | -0.27503500 | 0.23669700  |
| H | 4.48081200  | -0.66980900 | -1.10615100 |
| C | 6.60438100  | 0.52223300  | 1.27375400  |
| H | 7.58989500  | 0.35006700  | 1.68942200  |
| C | 6.94727600  | -1.42190700 | -0.28866200 |
| C | 6.31746100  | 2.43291200  | 2.87191200  |
| F | 6.57914700  | -2.59982000 | 0.26007100  |
| F | 8.26290000  | -1.25782200 | -0.03866200 |
| F | 6.80514800  | -1.56120900 | -1.63232600 |
| F | 7.00637000  | 3.48238800  | 2.36599500  |
| F | 7.15937800  | 1.77252700  | 3.69612400  |
| F | 5.32164700  | 2.94382300  | 3.62769900  |
| S | 2.93378400  | 3.78571800  | -0.76894500 |
| H | 3.88933200  | 2.53814500  | 1.67882900  |
| H | 2.26254500  | 0.22028700  | -0.42248900 |
| H | 0.42496600  | 1.18344700  | -1.17381300 |
| C | 0.39878700  | 4.89866300  | 0.57003500  |
| H | 0.05968200  | 5.52941400  | -0.25358200 |
| H | 1.42559200  | 4.37196700  | -0.03556700 |
| N | -0.45658400 | -1.23084000 | 1.43308800  |
| S | 1.11554200  | -1.29103600 | 1.59857100  |
| O | 1.60927800  | -0.29836700 | 2.56428000  |
| O | 1.86251500  | -1.40488400 | 0.31352700  |
| C | 1.40393800  | -2.94849100 | 2.41116600  |
| F | 0.77715900  | -3.00419200 | 3.59761900  |
| F | 2.71331800  | -3.12253900 | 2.61363700  |
| F | 0.94464600  | -3.93400400 | 1.63709300  |
| C | -1.47213000 | 4.95682500  | -2.16272400 |
| C | -0.91611600 | 5.43476100  | -3.36273300 |
| C | -2.32696100 | 5.82419800  | -1.46457800 |
| C | -1.18008700 | 6.72270700  | -3.82962100 |
| H | -0.26959000 | 4.79551600  | -3.95658100 |
| C | -2.59147700 | 7.11555800  | -1.92495800 |
| H | -2.80144200 | 5.50260700  | -0.54345400 |
| C | -2.01764200 | 7.57437800  | -3.10962300 |
| H | -0.72761200 | 7.05770300  | -4.75923400 |
| H | -3.25310300 | 7.76062700  | -1.35266600 |
| H | -2.22250100 | 8.57915800  | -3.46851700 |
| C | -2.23181000 | 2.58061200  | -2.51712300 |
| H | -2.00966900 | 2.75317300  | -3.57662300 |
| H | -1.96221300 | 1.54173900  | -2.29460100 |
| C | -3.72187100 | 2.77643700  | -2.29753500 |
| C | -4.41577200 | 3.55436000  | -3.14578000 |
| H | -3.86367400 | 4.03405200  | -3.95505600 |

|   |             |            |             |
|---|-------------|------------|-------------|
| C | -4.35825100 | 2.01799800 | -1.15160700 |
| H | -4.32530100 | 2.57110100 | -0.20330600 |
| H | -5.41220100 | 1.79725100 | -1.33984800 |
| H | -3.84683200 | 1.06611300 | -0.97569300 |
| C | -0.31381300 | 2.97562700 | 2.06016900  |
| H | 0.20398600  | 2.01953300 | 1.88947300  |
| H | 0.19684000  | 3.49705100 | 2.87002700  |
| H | -1.31980800 | 2.69632900 | 2.39742400  |
| C | 1.08752400  | 5.67115200 | 1.69378200  |
| H | 1.77707300  | 6.40356500 | 1.26334000  |
| H | 0.35663900  | 6.21679600 | 2.30159300  |
| H | 1.66905700  | 5.02304200 | 2.35445200  |
| C | -5.88321800 | 3.87552100 | -3.12025000 |
| H | -6.03886500 | 4.95427200 | -2.97806200 |
| H | -6.35954800 | 3.61769000 | -4.07622800 |
| H | -6.42271200 | 3.35745500 | -2.32305500 |

TS-EF-6SS-2

1 imaginary frequency

H = -5393.925799

G = -5394.134949

E(M06-2X-DCM) = -5394.851836

|   |             |             |             |
|---|-------------|-------------|-------------|
| O | -0.98966300 | -2.59885400 | -0.76248800 |
| O | -2.77905500 | -1.08549200 | 0.37176700  |
| P | -1.19067600 | -1.14308700 | -0.03307100 |
| O | -0.93844400 | 0.01199500  | -0.95706200 |
| C | -2.97139500 | -3.17914000 | -4.40120000 |
| C | -3.63357600 | -3.36259500 | -3.19128200 |
| C | -2.93770200 | -3.25473300 | -1.97918500 |
| C | -0.89791200 | -2.68297400 | -3.19170200 |
| C | -1.60805900 | -2.88188000 | -4.38941800 |
| C | -3.33493500 | -2.07776600 | 1.18367900  |
| C | -3.68672700 | -3.30771700 | 0.62227100  |
| C | -4.09946000 | -4.35092800 | 1.46817300  |
| C | -4.25802200 | -4.14473600 | 2.83336000  |
| C | -4.02104900 | -2.87412100 | 3.35422100  |
| C | -3.55478200 | -1.81957700 | 2.55279400  |
| H | -1.07248500 | -2.77710600 | -5.32839300 |
| H | -4.18498400 | -2.68201800 | 4.41058200  |
| C | -3.80812400 | -3.75677300 | -0.83436900 |
| C | -5.22903000 | -3.44860200 | -1.41613100 |
| H | -5.46478300 | -2.39482000 | -1.22750000 |
| H | -6.01250200 | -4.05482300 | -0.95065700 |
| H | -5.38005400 | -5.84383000 | 0.55721200  |

|   |             |             |             |
|---|-------------|-------------|-------------|
| H | -3.87008900 | -6.50067300 | 1.18056400  |
| C | -1.60937500 | -2.83880000 | -1.98539900 |
| H | -3.49917900 | -3.27819900 | -5.34650800 |
| H | -4.57637400 | -4.95401600 | 3.48559100  |
| C | -5.08996600 | -3.68907900 | -2.93717200 |
| H | -5.76907200 | -3.06249700 | -3.52688300 |
| H | -5.31707600 | -4.73163700 | -3.20038900 |
| C | -4.30988900 | -5.62760500 | 0.68509300  |
| C | -3.63562500 | -5.30453400 | -0.66293000 |
| H | -2.56506700 | -5.53189000 | -0.60388700 |
| H | -4.05045400 | -5.86623900 | -1.50559900 |
| C | -3.41202400 | -0.46844700 | 3.18738900  |
| C | -2.38030400 | -0.21587200 | 4.12237500  |
| C | -4.41709800 | 0.50416200  | 2.95784300  |
| C | -1.35751600 | -1.17163400 | 4.41798800  |
| C | -2.33921800 | 1.05104500  | 4.81934300  |
| C | -4.36307100 | 1.76869600  | 3.65766500  |
| C | -0.37227300 | -0.90099800 | 5.32971900  |
| H | -1.35124100 | -2.11005300 | 3.88044300  |
| C | -1.29624500 | 1.29143900  | 5.76842200  |
| C | -3.32303500 | 2.01024100  | 4.56106100  |
| C | -0.34113700 | 0.34388300  | 6.01972500  |
| H | 0.40827600  | -1.63390100 | 5.50796700  |
| H | -1.28366600 | 2.24649700  | 6.28911300  |
| H | -3.29608600 | 2.95679600  | 5.09840100  |
| H | 0.44892500  | 0.53913400  | 6.73986900  |
| C | 0.56088400  | -2.35487300 | -3.23838200 |
| C | 1.00006700  | -1.16990600 | -3.88239500 |
| C | 1.50954900  | -3.26411600 | -2.70533300 |
| C | 0.09924000  | -0.20624300 | -4.44287800 |
| C | 2.41648800  | -0.89878500 | -3.99525100 |
| C | 2.91963400  | -2.95571800 | -2.78247700 |
| C | 0.55896400  | 0.89812800  | -5.11507600 |
| H | -0.96701600 | -0.36157700 | -4.33072200 |
| C | 2.85346600  | 0.27314400  | -4.68975600 |
| C | 3.33497600  | -1.78907100 | -3.43091800 |
| C | 1.95610100  | 1.14272100  | -5.24855100 |
| H | -0.15116900 | 1.59598200  | -5.55235000 |
| H | 3.92310500  | 0.45190100  | -4.77180700 |
| H | 4.39986200  | -1.57720600 | -3.50885000 |
| H | 2.30313900  | 2.02051000  | -5.78721500 |
| C | -6.52294100 | 1.21305300  | 1.93533700  |
| H | -7.37080700 | 1.00110100  | 1.28973900  |
| C | -5.53753500 | 0.27358000  | 2.09565900  |

|   |             |             |             |
|---|-------------|-------------|-------------|
| H | -5.61195000 | -0.67657600 | 1.57898300  |
| C | -6.45279000 | 2.46495600  | 2.61116200  |
| H | -7.24276300 | 3.19822200  | 2.47167500  |
| C | -5.39873000 | 2.73168500  | 3.44277500  |
| H | -5.33931600 | 3.67768600  | 3.97662300  |
| C | 2.08263000  | -5.35700200 | -1.58184700 |
| H | 1.77122600  | -6.29376800 | -1.12765600 |
| C | 3.46591200  | -5.02425000 | -1.62086900 |
| H | 4.19576600  | -5.70085600 | -1.18504400 |
| C | 3.87062700  | -3.85843200 | -2.21104200 |
| H | 4.92283100  | -3.58906300 | -2.24657500 |
| C | 1.14153900  | -4.50969100 | -2.10438200 |
| H | 0.09440000  | -4.78567600 | -2.06723300 |
| C | -1.19330000 | 3.61820800  | -1.72584800 |
| C | -1.47613500 | 3.31105200  | -0.23213600 |
| H | -2.46478700 | 3.71080900  | 0.03931100  |
| H | -1.59410000 | 2.22711600  | -0.13739900 |
| C | -0.51793900 | 3.75582700  | 0.84233100  |
| C | 0.27230500  | 3.17089100  | -2.08117600 |
| H | 0.93909000  | 4.03009400  | -2.09749200 |
| H | 0.28070200  | 2.72853300  | -3.08285000 |
| N | 0.87422500  | 2.18307000  | -1.17924400 |
| C | 2.12851300  | 2.27325600  | -0.69484600 |
| N | 2.71819000  | 1.12983200  | -0.30636300 |
| C | 4.01032200  | 0.93984300  | 0.26164100  |
| C | 4.47862500  | 1.65368000  | 1.36610900  |
| C | 4.78915500  | -0.07577300 | -0.29572000 |
| C | 5.74669300  | 1.37221600  | 1.87392400  |
| C | 6.04867300  | -0.35718400 | 0.23105400  |
| H | 4.40133400  | -0.64439300 | -1.13286700 |
| C | 6.54081700  | 0.37062100  | 1.31286100  |
| H | 7.52205900  | 0.15655500  | 1.71915900  |
| C | 6.84970500  | -1.48971000 | -0.35538600 |
| C | 6.28650800  | 2.19219600  | 3.01664400  |
| F | 6.47801300  | -2.68547000 | 0.14979600  |
| F | 8.17100400  | -1.34929800 | -0.11952800 |
| F | 6.68549900  | -1.57123600 | -1.70121600 |
| F | 6.99296800  | 3.25751600  | 2.57103400  |
| F | 7.11743000  | 1.47189700  | 3.80084500  |
| F | 5.29949400  | 2.67557400  | 3.80127800  |
| S | 2.90633300  | 3.81785800  | -0.51968300 |
| H | 3.86173000  | 2.40918600  | 1.83168700  |
| H | 2.22016100  | 0.23850800  | -0.44562800 |
| H | 0.39724400  | 1.26637100  | -1.14502100 |

|   |             |             |             |
|---|-------------|-------------|-------------|
| C | 0.30826400  | 4.88257600  | 0.72994600  |
| H | 0.03218200  | 5.56554100  | -0.07487200 |
| H | 1.37205000  | 4.37252100  | 0.15433200  |
| N | -0.39661400 | -1.25644000 | 1.36893600  |
| S | 1.17021300  | -1.47109000 | 1.47072500  |
| O | 1.76499600  | -0.65757000 | 2.53733500  |
| O | 1.86700500  | -1.47571400 | 0.15300500  |
| C | 1.34714700  | -3.23673800 | 2.06136800  |
| F | 0.80352800  | -3.37420500 | 3.28232000  |
| F | 2.64340300  | -3.55248100 | 2.13603800  |
| F | 0.73780400  | -4.08154000 | 1.22645200  |
| C | -1.38332800 | 5.09262500  | -2.12751700 |
| C | -0.80910900 | 5.57299500  | -3.31814300 |
| C | -2.18280800 | 5.98438300  | -1.39531200 |
| C | -1.01428500 | 6.88261900  | -3.75157900 |
| H | -0.19795000 | 4.91602500  | -3.93012600 |
| C | -2.39136700 | 7.29687800  | -1.82503100 |
| H | -2.65931200 | 5.66338200  | -0.47511200 |
| C | -1.80790400 | 7.75464200  | -3.00562400 |
| H | -0.55283300 | 7.21907600  | -4.67619800 |
| H | -3.01480700 | 7.96001900  | -1.23100000 |
| H | -1.96913800 | 8.77558600  | -3.34013500 |
| C | -2.17001300 | 2.72611600  | -2.59360700 |
| H | -1.83815900 | 2.83303300  | -3.63481400 |
| H | -1.98469900 | 1.68568100  | -2.30623200 |
| C | -3.66179800 | 3.01754800  | -2.53433600 |
| C | -4.43960900 | 2.35049400  | -1.66363000 |
| H | -3.95860200 | 1.61767100  | -1.01439400 |
| C | -4.18968800 | 3.98734900  | -3.56862200 |
| H | -3.97354000 | 3.61089700  | -4.57883500 |
| H | -5.26936200 | 4.13691400  | -3.49934700 |
| H | -3.71134100 | 4.96914300  | -3.49412800 |
| C | -0.51455400 | 2.88599900  | 2.05774500  |
| H | -0.20210000 | 1.86273900  | 1.80931500  |
| H | 0.11396100  | 3.25739400  | 2.86677900  |
| H | -1.54171600 | 2.78571500  | 2.43678800  |
| C | 0.94185300  | 5.58116900  | 1.93184300  |
| H | 1.67565200  | 6.31379400  | 1.58220900  |
| H | 0.18640400  | 6.11760800  | 2.51734700  |
| H | 1.46304000  | 4.88842500  | 2.59740700  |
| C | -5.92602500 | 2.45954200  | -1.47276500 |
| H | -6.40790800 | 1.48661100  | -1.64215500 |
| H | -6.16117700 | 2.74176300  | -0.43897400 |
| H | -6.39916800 | 3.18657200  | -2.13757900 |

TS-EF-6SS-3

l imaginary frequency

H = -5393.920803

G = -5394.126268

E(M06-2X-DCM) = -5394.844566

|   |            |             |             |
|---|------------|-------------|-------------|
| O | 1.79438200 | -2.68667100 | -0.31510800 |
| O | 2.53993200 | -0.31366400 | -1.02663800 |
| P | 1.21827700 | -1.18000200 | -0.58896100 |
| O | 0.62110300 | -0.51924200 | 0.61896800  |
| C | 5.16125200 | -3.44432700 | 2.05825800  |
| C | 5.30136700 | -3.06021700 | 0.72929300  |
| C | 4.17608000 | -2.84799200 | -0.08234200 |
| C | 2.72787900 | -3.36494000 | 1.81451600  |
| C | 3.88092000 | -3.61470300 | 2.57934300  |
| C | 3.10763900 | -0.53665600 | -2.28324600 |
| C | 3.88167100 | -1.67334300 | -2.49857300 |
| C | 4.21133500 | -2.03568200 | -3.81328500 |
| C | 3.90697700 | -1.19020400 | -4.87544800 |
| C | 3.29930100 | 0.03909200  | -4.60971700 |
| C | 2.88021700 | 0.39249300  | -3.31685500 |
| H | 3.75461100 | -3.93875600 | 3.60807600  |
| H | 3.12294700 | 0.74195400  | -5.41889200 |
| C | 4.61096600 | -2.59028400 | -1.52241500 |
| C | 6.05842500 | -2.03385700 | -1.27441000 |
| H | 5.98567800 | -0.96657100 | -1.03511300 |
| H | 6.70005500 | -2.13446700 | -2.15483700 |
| H | 5.96161800 | -3.29598100 | -4.07924700 |
| H | 4.45819400 | -4.06440000 | -4.57374100 |
| C | 2.90323200 | -2.94590900 | 0.48146800  |
| H | 6.03400500 | -3.61413800 | 2.68366400  |
| H | 4.16294500 | -1.46265400 | -5.89630400 |
| C | 6.57466000 | -2.80268800 | -0.04311100 |
| H | 7.31189100 | -2.23405700 | 0.53508700  |
| H | 7.05964200 | -3.74565000 | -0.33332800 |
| C | 4.89533500 | -3.38803800 | -3.83013000 |
| C | 4.69469700 | -3.89398900 | -2.38062900 |
| H | 3.74282400 | -4.43115500 | -2.30126100 |
| H | 5.48967900 | -4.56709900 | -2.04364000 |
| C | 2.31622700 | 1.75558200  | -3.05629300 |
| C | 1.06003300 | 2.13876200  | -3.58285300 |
| C | 3.10677500 | 2.69804000  | -2.34852400 |
| C | 0.21947000 | 1.23318600  | -4.30427300 |
| C | 0.58118300 | 3.48952600  | -3.38564000 |

|   |              |              |              |
|---|--------------|--------------|--------------|
| C | 2. 61005500  | 4. 04081600  | -2. 14850600 |
| C | -0. 98739800 | 1. 63445200  | -4. 81364400 |
| H | 0. 54029200  | 0. 20602900  | -4. 41875500 |
| C | -0. 68291300 | 3. 86801900  | -3. 93737900 |
| C | 1. 36136200  | 4. 39799300  | -2. 66594100 |
| C | -1. 44387700 | 2. 97147800  | -4. 63791800 |
| H | -1. 61138400 | 0. 91820300  | -5. 33952100 |
| H | -1. 02280200 | 4. 89070400  | -3. 78912500 |
| H | 0. 99374600  | 5. 41009100  | -2. 50901000 |
| H | -2. 40159200 | 3. 27242300  | -5. 05484000 |
| C | 1. 39597600  | -3. 60770600 | 2. 45231100  |
| C | 1. 01030200  | -2. 83199100 | 3. 57286600  |
| C | 0. 59390000  | -4. 69830400 | 2. 03355400  |
| C | 1. 74375500  | -1. 67974800 | 4. 00700400  |
| C | -0. 16871900 | -3. 19702200 | 4. 32539400  |
| C | -0. 61068700 | -5. 02057300 | 2. 76506300  |
| C | 1. 37888300  | -0. 97831400 | 5. 12774200  |
| H | 2. 59847900  | -1. 35295600 | 3. 42706700  |
| C | -0. 50196000 | -2. 45372700 | 5. 50194900  |
| C | -0. 94938000 | -4. 27456600 | 3. 89781200  |
| C | 0. 25276200  | -1. 38308000 | 5. 90112400  |
| H | 1. 94879100  | -0. 10227900 | 5. 42180300  |
| H | -1. 37069100 | -2. 76644900 | 6. 07791400  |
| H | -1. 83389900 | -4. 55085700 | 4. 46941900  |
| H | -0. 00697100 | -0. 83275000 | 6. 80182400  |
| C | 5. 15121800  | 3. 33273800  | -1. 16306700 |
| H | 6. 13784100  | 3. 07228700  | -0. 78888800 |
| C | 4. 41030100  | 2. 39653400  | -1. 83635400 |
| H | 4. 81985200  | 1. 40610800  | -1. 99738500 |
| C | 4. 64568200  | 4. 64621200  | -0. 95132700 |
| H | 5. 24371900  | 5. 37545400  | -0. 41146600 |
| C | 3. 41149800  | 4. 98669200  | -1. 43514300 |
| H | 3. 01467200  | 5. 98661500  | -1. 28477400 |
| C | 0. 14234500  | -6. 58595100 | 0. 54885200  |
| H | 0. 42595200  | -7. 20018800 | -0. 30140600 |
| C | -1. 05528200 | -6. 88316600 | 1. 25847300  |
| H | -1. 67556500 | -7. 71758500 | 0. 94254300  |
| C | -1. 41479500 | -6. 12289800 | 2. 33760200  |
| H | -2. 32066100 | -6. 34576100 | 2. 89688100  |
| C | 0. 93835300  | -5. 53649100 | 0. 92540000  |
| H | 1. 84867900  | -5. 33072400 | 0. 37533100  |
| C | -5. 28673200 | 0. 33890200  | 0. 43212000  |
| C | -5. 18096700 | 0. 09075400  | 1. 99186600  |
| H | -5. 76176900 | 0. 87844800  | 2. 48207300  |



|   |             |             |             |
|---|-------------|-------------|-------------|
| H | -5.70512600 | -0.85209500 | 2.20180000  |
| C | -3.84233800 | 0.00615400  | 2.67319900  |
| C | -4.34770800 | 1.51656800  | 0.04232600  |
| H | -4.62330700 | 2.41397900  | 0.59455500  |
| H | -4.45832900 | 1.72571900  | -1.02515300 |
| N | -2.91498900 | 1.29119800  | 0.28080800  |
| C | -2.08550700 | 2.13308000  | 0.92190300  |
| N | -0.76043600 | 1.90369700  | 0.82053300  |
| C | 0.26840000  | 2.71963300  | 1.37030000  |
| C | 0.31825400  | 4.08987700  | 1.10170800  |
| C | 1.27966300  | 2.11266800  | 2.11851000  |
| C | 1.36103200  | 4.85578500  | 1.61782500  |
| C | 2.32333700  | 2.89319500  | 2.61956500  |
| H | 1.25855200  | 1.04028900  | 2.27449400  |
| C | 2.36812000  | 4.26556900  | 2.38223800  |
| H | 3.18955800  | 4.86159400  | 2.76022300  |
| C | 3.38407900  | 2.24423100  | 3.46918600  |
| C | 1.38693600  | 6.33890000  | 1.36066600  |
| F | 2.98038100  | 2.12731300  | 4.76204700  |
| F | 4.52932800  | 2.95712100  | 3.48366900  |
| F | 3.68284000  | 0.99852000  | 3.04314300  |
| F | 0.83277400  | 6.65175700  | 0.16425500  |
| F | 2.64660700  | 6.82877700  | 1.36046800  |
| F | 0.69785200  | 7.02405700  | 2.30022500  |
| S | -2.71218700 | 3.36277100  | 1.99392300  |
| H | -0.43342100 | 4.54849600  | 0.47165600  |
| H | -0.42022400 | 0.98824800  | 0.47302700  |
| H | -2.47219300 | 0.64905800  | -0.39972200 |
| C | -3.57338800 | 0.95511900  | 3.66435200  |
| H | -4.46411800 | 1.44800800  | 4.06772700  |
| H | -3.26896800 | 2.01536000  | 2.88850400  |
| N | 0.30829100  | -1.39205700 | -1.90998800 |
| S | -1.25840300 | -1.51695700 | -1.81345600 |
| O | -1.95629800 | -0.19633600 | -1.88884200 |
| O | -1.80091200 | -2.44029000 | -0.79962500 |
| C | -1.63720300 | -2.32195100 | -3.45315600 |
| F | -1.16285600 | -1.61205200 | -4.48513800 |
| F | -2.96809600 | -2.41430200 | -3.57730100 |
| F | -1.11180700 | -3.54644200 | -3.49473700 |
| C | -2.88295800 | -1.10486300 | 2.37536500  |
| H | -1.83999100 | -0.77373500 | 2.37781300  |
| H | -2.95633500 | -1.84705600 | 3.18568500  |
| H | -3.07265200 | -1.61688800 | 1.43350500  |
| C | -2.41555000 | 0.84721000  | 4.63972800  |

|   |              |             |             |
|---|--------------|-------------|-------------|
| H | -2.28977100  | 1.79045500  | 5.17957000  |
| H | -2.59590500  | 0.05611700  | 5.37673400  |
| H | -1.46940100  | 0.61722400  | 4.14325300  |
| C | -6.76042800  | 0.74571800  | 0.20570200  |
| C | -7.77294200  | -0.19772600 | 0.45425000  |
| C | -7.15970000  | 2.02778500  | -0.19994700 |
| C | -9.12036300  | 0.12442100  | 0.31276400  |
| H | -7.50751000  | -1.20615000 | 0.75638700  |
| C | -8.51139400  | 2.35329600  | -0.34983500 |
| H | -6.42785300  | 2.79877200  | -0.41296900 |
| C | -9.49854500  | 1.40618200  | -0.09171900 |
| H | -9.87581300  | -0.63067900 | 0.51345700  |
| H | -8.78463800  | 3.35563900  | -0.66874300 |
| H | -10.54881500 | 1.65988700  | -0.20588500 |
| C | -4.95546600  | -0.97561000 | -0.36684400 |
| H | -5.25793500  | -1.82898900 | 0.24963100  |
| H | -3.87065600  | -1.06372400 | -0.47059200 |
| C | -5.57725100  | -1.16502000 | -1.74501500 |
| C | -6.29509900  | -2.27633500 | -1.97713600 |
| H | -6.42837800  | -2.96895700 | -1.14400400 |
| C | -5.28063700  | -0.12304500 | -2.79693800 |
| H | -5.80348800  | 0.81883800  | -2.58224700 |
| H | -4.20667200  | 0.08891100  | -2.83808300 |
| H | -5.59467700  | -0.44092500 | -3.79360000 |
| C | -6.94822200  | -2.72789800 | -3.25269500 |
| H | -6.56345600  | -3.71043600 | -3.55827400 |
| H | -8.03178400  | -2.84617200 | -3.11253400 |
| H | -6.79777000  | -2.03769600 | -4.08634600 |

TS-EF-6SS-4

l imaginary frequency

H = -5393.920114

G = -5394.126534

E(M06-2X-DCM) = -5394.842497

|   |             |             |             |
|---|-------------|-------------|-------------|
| O | -2.25682100 | -2.37477700 | 0.49589400  |
| O | -2.48610900 | 0.13256300  | 1.09783200  |
| P | -1.38165300 | -1.00603100 | 0.67875300  |
| O | -0.70374500 | -0.52671200 | -0.57174700 |
| C | -5.71698000 | -2.56567200 | -1.85561000 |
| C | -5.76738100 | -2.06716200 | -0.55859100 |
| C | -4.62091800 | -2.04900000 | 0.25095500  |
| C | -3.32282200 | -2.99667900 | -1.58777400 |
| C | -4.50591800 | -3.04836500 | -2.34594800 |
| C | -3.07813800 | 0.08365700  | 2.36127100  |

|   |             |             |             |
|---|-------------|-------------|-------------|
| C | -4.08280600 | -0.84686400 | 2.61477900  |
| C | -4.48778000 | -1.07157400 | 3.93925800  |
| C | -4.00853100 | -0.26937200 | 4.96972700  |
| C | -3.14267000 | 0.78154800  | 4.66184900  |
| C | -2.65124300 | 0.98039500  | 3.36076900  |
| H | -4.45701500 | -3.46823000 | -3.34616300 |
| H | -2.81735400 | 1.46090600  | 5.44432400  |
| C | -4.99184200 | -1.62564600 | 1.66932900  |
| C | -6.28187000 | -0.78153300 | 1.37295100  |
| H | -5.97763900 | 0.22899400  | 1.07637400  |
| H | -6.93078600 | -0.68971400 | 2.24901700  |
| H | -6.47450000 | -1.89963700 | 4.23439800  |
| H | -5.18119600 | -2.95816000 | 4.78428200  |
| C | -3.40003700 | -2.45219000 | -0.29078300 |
| H | -6.60734900 | -2.58711400 | -2.47887600 |
| H | -4.32291900 | -0.43412900 | 5.99729800  |
| C | -6.95299900 | -1.48870200 | 0.17939000  |
| H | -7.54393500 | -0.80577700 | -0.44160600 |
| H | -7.63659300 | -2.28137100 | 0.51529900  |
| C | -5.45398200 | -2.23672700 | 4.00540300  |
| C | -5.36312800 | -2.83904300 | 2.58287400  |
| H | -4.55149500 | -3.57420000 | 2.54031300  |
| H | -6.28437000 | -3.33716700 | 2.26407100  |
| C | -1.79337800 | 2.17275800  | 3.06728900  |
| C | -0.51117300 | 2.30583900  | 3.65347200  |
| C | -2.32649500 | 3.22848200  | 2.28221000  |
| C | 0.08287900  | 1.27661400  | 4.45015600  |
| C | 0.25098800  | 3.51773200  | 3.44739700  |
| C | -1.54468300 | 4.42592800  | 2.06914200  |
| C | 1.31634800  | 1.44149000  | 5.02376500  |
| H | -0.44949200 | 0.34249000  | 4.57252500  |
| C | 1.53336600  | 3.65050400  | 4.06628600  |
| C | -0.28076700 | 4.53761200  | 2.65512800  |
| C | 2.05034200  | 2.64721600  | 4.84028400  |
| H | 1.74748100  | 0.63518600  | 5.60937700  |
| H | 2.08666600  | 4.57373200  | 3.90874500  |
| H | 0.29580200  | 5.44797000  | 2.50151700  |
| H | 3.02440600  | 2.76153800  | 5.30909500  |
| C | -2.07482600 | -3.56572200 | -2.18590400 |
| C | -1.54931200 | -2.99616800 | -3.37193900 |
| C | -1.50382600 | -4.74909700 | -1.65367600 |
| C | -2.04527300 | -1.77320200 | -3.93115000 |
| C | -0.46817000 | -3.65785300 | -4.06706600 |
| C | -0.38606900 | -5.36872600 | -2.32941100 |

|   |             |             |             |
|---|-------------|-------------|-------------|
| C | -1.56110300 | -1.27781000 | -5.11488900 |
| H | -2.81514000 | -1.22720400 | -3.39955200 |
| C | -0.00507500 | -3.11970400 | -5.30962500 |
| C | 0.09033300  | -4.81710000 | -3.52216200 |
| C | -0.54262900 | -1.97239900 | -5.82910300 |
| H | -1.95396300 | -0.34375200 | -5.50471100 |
| H | 0.78265200  | -3.65297800 | -5.83798600 |
| H | 0.90415500  | -5.31363300 | -4.04784000 |
| H | -0.18988200 | -1.58135800 | -6.78003700 |
| C | -4.12252200 | 4.23035400  | 0.95564100  |
| H | -5.12173100 | 4.16908900  | 0.53239500  |
| C | -3.63705200 | 3.19021600  | 1.70484200  |
| H | -4.25950500 | 2.31975700  | 1.87568800  |
| C | -3.33467900 | 5.39337900  | 0.72636100  |
| H | -3.72667700 | 6.20329300  | 0.11778500  |
| C | -2.08462700 | 5.48587000  | 1.27544600  |
| H | -1.47131500 | 6.36750300  | 1.11067900  |
| C | -1.43204100 | -6.54133700 | 0.00646400  |
| H | -1.83264100 | -7.00665200 | 0.90296100  |
| C | -0.31350500 | -7.13033700 | -0.64769000 |
| H | 0.13229200  | -8.03505500 | -0.24331200 |
| C | 0.18816400  | -6.55984200 | -1.78542600 |
| H | 1.03397900  | -7.00562600 | -2.30388500 |
| C | -2.00716400 | -5.39728500 | -0.48069100 |
| H | -2.86198500 | -4.96992700 | 0.02930200  |
| C | 5.31767300  | -0.44629000 | -0.57788800 |
| C | 5.01577400  | -0.88602700 | -2.06727800 |
| H | 5.68701600  | -0.31354300 | -2.71341600 |
| H | 5.31728100  | -1.93884100 | -2.15902400 |
| C | 3.63404800  | -0.80056500 | -2.65539500 |
| C | 4.52579900  | 0.84174600  | -0.20779400 |
| H | 4.90324400  | 1.69008000  | -0.77758600 |
| H | 4.68319900  | 1.04063400  | 0.85611400  |
| N | 3.06723700  | 0.79420800  | -0.40061200 |
| C | 2.34254500  | 1.69543600  | -1.08485500 |
| N | 1.00106700  | 1.67066600  | -0.94435100 |
| C | 0.08625900  | 2.56493000  | -1.57180700 |
| C | 0.23770300  | 3.94953400  | -1.45136100 |
| C | -1.01150600 | 2.03487500  | -2.25301600 |
| C | -0.68953600 | 4.79827600  | -2.04999600 |
| C | -1.93836800 | 2.90089100  | -2.83799200 |
| H | -1.14777900 | 0.96029900  | -2.29245600 |
| C | -1.78084700 | 4.28173000  | -2.75043800 |
| H | -2.51126400 | 4.94699200  | -3.19491700 |

|   |             |             |             |
|---|-------------|-------------|-------------|
| C | -3.09296500 | 2.32557400  | -3.61508900 |
| C | -0.50985300 | 6.29061900  | -1.96439000 |
| F | -2.72511500 | 1.99912800  | -4.88184700 |
| F | -4.11758900 | 3.19721000  | -3.72108100 |
| F | -3.57318800 | 1.19841400  | -3.04760600 |
| F | 0.24800000  | 6.65171600  | -0.90350700 |
| F | -1.69579200 | 6.93161100  | -1.85052500 |
| F | 0.09568000  | 6.78492000  | -3.06759600 |
| S | 3.10842400  | 2.72884200  | -2.26973100 |
| H | 1.05605400  | 4.35997100  | -0.87385500 |
| H | 0.54464900  | 0.84449000  | -0.51747500 |
| H | 2.55897400  | 0.25156600  | 0.31958300  |
| C | 3.45440300  | 0.07414100  | -3.72795800 |
| H | 4.38054800  | 0.37465000  | -4.22820600 |
| H | 3.39140800  | 1.26308000  | -3.04907300 |
| N | -0.49108600 | -1.35460400 | 1.98296600  |
| S | 1.04839600  | -1.66414000 | 1.85885600  |
| O | 1.89138600  | -0.42917500 | 1.85718000  |
| O | 1.46243300  | -2.68590400 | 0.87893300  |
| C | 1.34879800  | -2.46638100 | 3.51872300  |
| F | 0.97675600  | -1.68474300 | 4.53932200  |
| F | 2.65886900  | -2.72254900 | 3.63633600  |
| F | 0.67678800  | -3.61554700 | 3.58971300  |
| C | 2.54317900  | -1.71742300 | -2.19354000 |
| H | 1.55810900  | -1.24159700 | -2.18338000 |
| H | 2.46288300  | -2.54280000 | -2.91869700 |
| H | 2.71596300  | -2.15405800 | -1.21060600 |
| C | 2.22473000  | 0.07868900  | -4.61579300 |
| H | 2.21473500  | 0.97580000  | -5.24216700 |
| H | 2.21250800  | -0.79623600 | -5.27557900 |
| H | 1.29437000  | 0.06145200  | -4.04208400 |
| C | 6.83187300  | -0.12655400 | -0.51827100 |
| C | 7.75801300  | -0.94585600 | -1.18873700 |
| C | 7.34886100  | 0.94847100  | 0.22171100  |
| C | 9.12924300  | -0.69865500 | -1.13467600 |
| H | 7.41512800  | -1.80277800 | -1.75998500 |
| C | 8.72176400  | 1.20004600  | 0.27856500  |
| H | 6.69031300  | 1.60688700  | 0.77504800  |
| C | 9.62084800  | 0.38088900  | -0.40040600 |
| H | 9.81223200  | -1.35487200 | -1.66774500 |
| H | 9.08330500  | 2.04355400  | 0.86064200  |
| H | 10.68836400 | 0.57801400  | -0.35713900 |
| C | 4.99604700  | -1.61341900 | 0.43287100  |
| H | 5.33430800  | -2.54660500 | -0.03538100 |

|   |            |             |            |
|---|------------|-------------|------------|
| H | 3.91134400 | -1.70458300 | 0.53942100 |
| C | 5.63290600 | -1.51749600 | 1.81876500 |
| C | 5.02061900 | -0.83842200 | 2.80367300 |
| H | 4.05463700 | -0.38964600 | 2.58441600 |
| C | 6.91084200 | -2.30377400 | 2.00427400 |
| H | 6.72054700 | -3.37332200 | 1.83358000 |
| H | 7.68387700 | -2.00373100 | 1.28893200 |
| H | 7.32802700 | -2.20290500 | 3.00856200 |
| C | 5.45825400 | -0.66439000 | 4.23128300 |
| H | 5.47344200 | 0.39914100  | 4.50568000 |
| H | 4.73713800 | -1.14860300 | 4.90405900 |
| H | 6.44714700 | -1.07778900 | 4.44520400 |

TS-EF-6SS-5

l imaginary frequency

H = -5393.922697

G = -5394.128248

E(M06-2X-DCM) = -5394.844790

|   |             |             |             |
|---|-------------|-------------|-------------|
| O | -2.09466100 | -2.46439900 | 0.44154400  |
| O | -2.52408700 | -0.03493300 | 1.21021400  |
| P | -1.33928100 | -1.03136700 | 0.67539200  |
| O | -0.77644700 | -0.41258300 | -0.56850000 |
| C | -5.42243900 | -2.71843400 | -2.08494600 |
| C | -5.56502900 | -2.30096400 | -0.76601600 |
| C | -4.46320300 | -2.27665200 | 0.10312400  |
| C | -3.02589800 | -3.04336300 | -1.71618100 |
| C | -4.16438700 | -3.11369600 | -2.53708200 |
| C | -3.12259100 | -0.25473900 | 2.44978000  |
| C | -4.09845200 | -1.24046000 | 2.57556800  |
| C | -4.54009200 | -1.60371400 | 3.85712400  |
| C | -4.11957100 | -0.89454200 | 4.97753600  |
| C | -3.26674500 | 0.19739000  | 4.80781500  |
| C | -2.74090800 | 0.53818000  | 3.55048500  |
| H | -4.04410600 | -3.47254200 | -3.55504600 |
| H | -2.97977200 | 0.79754400  | 5.66629600  |
| C | -4.92776800 | -1.97209900 | 1.52429600  |
| C | -6.23793200 | -1.16677100 | 1.21522800  |
| H | -5.96710600 | -0.12580400 | 1.00385300  |
| H | -6.93552000 | -1.16480800 | 2.05827900  |
| H | -6.51062400 | -2.50803400 | 3.98040400  |
| H | -5.21325100 | -3.57396000 | 4.50690500  |
| C | -3.19751700 | -2.57861200 | -0.39748800 |
| H | -6.27742200 | -2.74494900 | -2.75579100 |
| H | -4.46543300 | -1.16714200 | 5.97153600  |

|   |             |             |             |
|---|-------------|-------------|-------------|
| C | -6.81238900 | -1.82060700 | -0.05839100 |
| H | -7.39822700 | -1.12179100 | -0.66641300 |
| H | -7.47853300 | -2.65979300 | 0.18732700  |
| C | -5.46976000 | -2.79673700 | 3.77776000  |
| C | -5.28980900 | -3.27148100 | 2.31711000  |
| H | -4.44650800 | -3.96866000 | 2.25407500  |
| H | -6.17307800 | -3.77616800 | 1.91284700  |
| C | -1.87995500 | 1.75426300  | 3.40612200  |
| C | -0.62922800 | 1.83653000  | 4.06619000  |
| C | -2.37129200 | 2.86826900  | 2.67622300  |
| C | -0.07002600 | 0.74635500  | 4.80666000  |
| C | 0.13870600  | 3.06019200  | 3.99600000  |
| C | -1.57506600 | 4.07149000  | 2.58521500  |
| C | 1.12817700  | 0.86847100  | 5.46004300  |
| H | -0.59726800 | -0.19917900 | 4.81988000  |
| C | 1.38351200  | 3.14637500  | 4.69472500  |
| C | -0.34750100 | 4.13596600  | 3.24990200  |
| C | 1.86239400  | 2.08704000  | 5.41612400  |
| H | 1.53399100  | 0.01862700  | 6.00075000  |
| H | 1.93969900  | 4.07962600  | 4.63955600  |
| H | 0.23825900  | 5.05175100  | 3.19394500  |
| H | 2.80797000  | 2.16570400  | 5.94649900  |
| C | -1.70954800 | -3.50293200 | -2.25887900 |
| C | -1.12300900 | -2.82262100 | -3.35376400 |
| C | -1.10528000 | -4.67919100 | -1.74838000 |
| C | -1.66727000 | -1.61423600 | -3.89827500 |
| C | 0.07637600  | -3.34969300 | -3.96485700 |
| C | 0.11451500  | -5.17315100 | -2.34586200 |
| C | -1.10327600 | -0.99966200 | -4.98702200 |
| H | -2.54262100 | -1.17765800 | -3.43310400 |
| C | 0.62872600  | -2.68464900 | -5.10542800 |
| C | 0.66606700  | -4.50220300 | -3.44039000 |
| C | 0.05394600  | -1.54863400 | -5.61092500 |
| H | -1.54233100 | -0.08483700 | -5.37305800 |
| H | 1.51307400  | -3.11470600 | -5.57146000 |
| H | 1.56997500  | -4.89492300 | -3.90263300 |
| H | 0.47492400  | -1.06230200 | -6.48726600 |
| C | -4.09343500 | 3.97088200  | 1.33207900  |
| H | -5.07135100 | 3.94696000  | 0.85834200  |
| C | -3.65255100 | 2.88051500  | 2.03568800  |
| H | -4.28888000 | 2.00740000  | 2.11962200  |
| C | -3.28648500 | 5.13737200  | 1.21369000  |
| H | -3.63837800 | 5.98357800  | 0.63108300  |
| C | -2.06522200 | 5.18281200  | 1.82996800  |

|   |             |             |             |
|---|-------------|-------------|-------------|
| H | -1.43905900 | 6.06777200  | 1.75047700  |
| C | -1.05975600 | -6.57395900 | -0.20465000 |
| H | -1.50894300 | -7.12701500 | 0.61584400  |
| C | 0.15510100  | -7.04083700 | -0.78127400 |
| H | 0.62453300  | -7.94105600 | -0.39380900 |
| C | 0.71962800  | -6.35912500 | -1.82447900 |
| H | 1.64112700  | -6.71002100 | -2.28351900 |
| C | -1.66730600 | -5.43866400 | -0.67267600 |
| H | -2.59585800 | -5.10532800 | -0.22473600 |
| C | 5.22924000  | 0.33557300  | -0.19122200 |
| C | 5.36960400  | 0.17412200  | -1.74158600 |
| H | 5.89302100  | 1.05294700  | -2.12385100 |
| H | 6.02037200  | -0.69598100 | -1.91713600 |
| C | 4.15752900  | -0.01933400 | -2.61221700 |
| C | 4.18225400  | 1.45586300  | 0.13208100  |
| H | 4.52197600  | 2.39876300  | -0.29777100 |
| H | 4.13401600  | 1.57695700  | 1.21759300  |
| N | 2.79868800  | 1.22572700  | -0.30642500 |
| C | 2.04131700  | 2.09798100  | -1.00228300 |
| N | 0.70567900  | 1.90993500  | -0.98136700 |
| C | -0.27063200 | 2.73716600  | -1.60154900 |
| C | -0.27907000 | 4.12233000  | -1.40770900 |
| C | -1.28550800 | 2.12661500  | -2.34140800 |
| C | -1.28174900 | 4.89310200  | -1.98942500 |
| C | -2.28894900 | 2.91409300  | -2.91117100 |
| H | -1.29520500 | 1.04749100  | -2.44334000 |
| C | -2.29082400 | 4.29732400  | -2.74817800 |
| H | -3.07985800 | 4.90018400  | -3.18149000 |
| C | -3.35161000 | 2.25539000  | -3.75005800 |
| C | -1.27788700 | 6.38910900  | -1.81989800 |
| F | -2.90262700 | 1.99467200  | -5.00623100 |
| F | -4.44797900 | 3.03047900  | -3.88299700 |
| F | -3.74858200 | 1.07458000  | -3.22829900 |
| F | -0.56002500 | 6.78038700  | -0.74379000 |
| F | -2.53225700 | 6.87684200  | -1.66938300 |
| F | -0.74746300 | 7.01173300  | -2.89667400 |
| S | 2.77920600  | 3.31701500  | -2.00263000 |
| H | 0.47186100  | 4.59056000  | -0.78527600 |
| H | 0.31301800  | 1.02256100  | -0.61144200 |
| H | 2.29708900  | 0.59477600  | 0.33861800  |
| C | 3.93075500  | 0.96184300  | -3.59467900 |
| H | 4.83357300  | 1.51575500  | -3.87553900 |
| H | 3.48999400  | 1.93066500  | -2.85594400 |
| N | -0.36222500 | -1.37102400 | 1.92073800  |



|   |             |              |              |
|---|-------------|--------------|--------------|
| S | 1. 19025200 | -1. 52399200 | 1. 70513100  |
| O | 1. 94359300 | -0. 25531100 | 1. 92186300  |
| O | 1. 62692700 | -2. 29779100 | 0. 52201700  |
| C | 1. 64872300 | -2. 59557000 | 3. 16063900  |
| F | 1. 22063000 | -2. 08403600 | 4. 31915200  |
| F | 2. 98592500 | -2. 69162000 | 3. 20218400  |
| F | 1. 13274500 | -3. 81579300 | 3. 00974900  |
| C | 3. 30477000 | -1. 24005300 | -2. 49837800 |
| H | 2. 69719700 | -1. 40470500 | -3. 38964600 |
| H | 3. 95281100 | -2. 10840800 | -2. 33029800 |
| H | 2. 62914700 | -1. 21887400 | -1. 63526700 |
| C | 2. 92333300 | 0. 80946300  | -4. 72290400 |
| H | 2. 79474000 | 1. 76832400  | -5. 23381200 |
| H | 3. 26685900 | 0. 07771300  | -5. 46377200 |
| H | 1. 94160000 | 0. 48989200  | -4. 36471800 |
| C | 6. 55663900 | 0. 88156100  | 0. 40570400  |
| C | 7. 69810800 | 1. 18581500  | -0. 35190800 |
| C | 6. 63062400 | 1. 11769400  | 1. 79147600  |
| C | 8. 85432300 | 1. 69967600  | 0. 24143700  |
| H | 7. 72133700 | 1. 00945100  | -1. 42109500 |
| C | 7. 77950300 | 1. 63544600  | 2. 38700600  |
| H | 5. 78223200 | 0. 88876400  | 2. 42908000  |
| C | 8. 90216100 | 1. 93168100  | 1. 61356700  |
| H | 9. 71914200 | 1. 91585200  | -0. 38027900 |
| H | 7. 79417600 | 1. 80391500  | 3. 46048000  |
| H | 9. 79996100 | 2. 33353000  | 2. 07472500  |
| C | 4. 82795000 | -1. 00922400 | 0. 49973300  |
| H | 3. 78816500 | -1. 23104900 | 0. 26153300  |
| H | 4. 83271300 | -0. 83192200 | 1. 58282100  |
| C | 5. 64889500 | -2. 26228800 | 0. 21218600  |
| C | 4. 99291700 | -3. 37622700 | -0. 16634100 |
| H | 3. 90997800 | -3. 30881600 | -0. 26530700 |
| C | 7. 13205800 | -2. 23233900 | 0. 50494700  |
| H | 7. 68668600 | -1. 59047300 | -0. 18927600 |
| H | 7. 31845000 | -1. 82333800 | 1. 50577600  |
| H | 7. 58046800 | -3. 22739600 | 0. 46348400  |
| C | 5. 54547000 | -4. 75179200 | -0. 41868800 |
| H | 5. 11306500 | -5. 47312200 | 0. 28814300  |
| H | 5. 26707900 | -5. 10194600 | -1. 42216700 |
| H | 6. 63364200 | -4. 81391600 | -0. 33751200 |

TS-EF-6SS-6

l imaginary frequency

H = -5393. 922994

G = -5394.128062

E(M06-2X-DCM) = -5394.844453

|   |             |             |             |
|---|-------------|-------------|-------------|
| O | -1.90735300 | -2.60462000 | 0.36517700  |
| O | -2.58161500 | -0.22464000 | 1.11400000  |
| P | -1.29179400 | -1.11221300 | 0.63553700  |
| O | -0.72563200 | -0.44914900 | -0.58451700 |
| C | -5.08924700 | -3.13555400 | -2.30265100 |
| C | -5.32358100 | -2.74542900 | -0.98845700 |
| C | -4.26493500 | -2.62744900 | -0.07473100 |
| C | -2.68922000 | -3.23898200 | -1.83745100 |
| C | -3.78237700 | -3.40618500 | -2.70502300 |
| C | -3.20983900 | -0.50424400 | 2.32742500  |
| C | -4.09575300 | -1.57572100 | 2.41172900  |
| C | -4.55182600 | -1.98547700 | 3.67419500  |
| C | -4.24107300 | -1.24852600 | 4.81232300  |
| C | -3.48517700 | -0.08256900 | 4.67939900  |
| C | -2.94480800 | 0.31261600  | 3.44453300  |
| H | -3.58783300 | -3.74053600 | -3.71981500 |
| H | -3.28649900 | 0.53524400  | 5.55026200  |
| C | -4.81195800 | -2.37547900 | 1.32718600  |
| C | -6.17781900 | -1.69278600 | 0.96738700  |
| H | -5.99647300 | -0.62986800 | 0.77003100  |
| H | -6.90595300 | -1.76089900 | 1.78135300  |
| H | -6.43417300 | -3.06762800 | 3.71706500  |
| H | -5.06612400 | -4.01258600 | 4.29335000  |
| C | -2.95732200 | -2.80850300 | -0.52330000 |
| H | -5.91003600 | -3.23529800 | -3.00840700 |
| H | -4.59832100 | -1.55838100 | 5.79126500  |
| C | -6.63757100 | -2.38855100 | -0.33029500 |
| H | -7.26173800 | -1.74340300 | -0.95912900 |
| H | -7.23130000 | -3.28808400 | -0.11414400 |
| C | -5.36394600 | -3.25841600 | 3.55575900  |
| C | -5.08326800 | -3.70683100 | 2.10274800  |
| H | -4.17727600 | -4.32281500 | 2.07222900  |
| H | -5.89941700 | -4.28880700 | 1.66280000  |
| C | -2.19381600 | 1.60329000  | 3.33805000  |
| C | -0.97522200 | 1.79007000  | 4.03546900  |
| C | -2.76428400 | 2.67729800  | 2.60615100  |
| C | -0.33938100 | 0.74438700  | 4.77820000  |
| C | -0.32105300 | 3.07962700  | 4.00208600  |
| C | -2.08114300 | 3.95033500  | 2.55490200  |
| C | 0.82589800  | 0.96480700  | 5.46453900  |
| H | -0.77918400 | -0.24470000 | 4.76567500  |
| C | 0.89197900  | 3.26811500  | 4.73576900  |

|   |             |             |             |
|---|-------------|-------------|-------------|
| C | -0.88400200 | 4.11756800  | 3.25625400  |
| C | 1.44701000  | 2.24555100  | 5.45568400  |
| H | 1.29334800  | 0.14720400  | 6.00516100  |
| H | 1.36221600  | 4.24859000  | 4.70745500  |
| H | -0.38427100 | 5.08421900  | 3.22921600  |
| H | 2.36805300  | 2.40155300  | 6.01143300  |
| C | -1.31547900 | -3.56378700 | -2.33320100 |
| C | -0.76158200 | -2.82091100 | -3.40445000 |
| C | -0.61696000 | -4.67981800 | -1.80816100 |
| C | -1.39802000 | -1.66152100 | -3.95600000 |
| C | 0.49886300  | -3.22922000 | -3.98260000 |
| C | 0.66341100  | -5.04935200 | -2.36764700 |
| C | -0.86295900 | -0.98878600 | -5.02485100 |
| H | -2.32061600 | -1.30869300 | -3.51146500 |
| C | 1.01683200  | -2.50965100 | -5.10614700 |
| C | 1.18022000  | -4.32321700 | -3.44386700 |
| C | 0.35438900  | -1.42700200 | -5.62154100 |
| H | -1.37126000 | -0.11270400 | -5.41583700 |
| H | 1.94749000  | -2.85556000 | -5.55186500 |
| H | 2.13013600  | -4.62639200 | -3.88062800 |
| H | 0.75127400  | -0.89913700 | -6.48502700 |
| C | -4.54023000 | 3.63525700  | 1.22186900  |
| H | -5.49653800 | 3.52763100  | 0.71665800  |
| C | -4.02078400 | 2.57977400  | 1.92509800  |
| H | -4.57434400 | 1.64959300  | 1.97730000  |
| C | -3.84305500 | 4.87381200  | 1.14474100  |
| H | -4.25529800 | 5.69326100  | 0.56345700  |
| C | -2.65077500 | 5.02329700  | 1.80006300  |
| H | -2.10757600 | 5.96342700  | 1.75145800  |
| C | -0.43762800 | -6.57219200 | -0.27154400 |
| H | -0.85737600 | -7.17219500 | 0.53135200  |
| C | 0.83544300  | -6.91413500 | -0.80876100 |
| H | 1.37785300  | -7.76658300 | -0.40879200 |
| C | 1.36443600  | -6.17390900 | -1.83048200 |
| H | 2.33005500  | -6.43052400 | -2.26023400 |
| C | -1.13749200 | -5.49832300 | -0.75526500 |
| H | -2.10841900 | -5.26040500 | -0.33747200 |
| C | 5.16865100  | 0.62260700  | -0.09246700 |
| C | 5.37363400  | 0.67537700  | -1.64339100 |
| H | 5.77404200  | 1.65924400  | -1.89920700 |
| H | 6.14478300  | -0.06750700 | -1.89404400 |
| C | 4.23043900  | 0.40508400  | -2.57614100 |
| C | 4.05870300  | 1.65494900  | 0.31320800  |
| H | 4.35346900  | 2.64968600  | -0.02342400 |

|   |             |             |             |
|---|-------------|-------------|-------------|
| H | 3.99024700  | 1.67018500  | 1.40443200  |
| N | 2.69775500  | 1.38718000  | -0.17112700 |
| C | 1.91225500  | 2.24899300  | -0.84875700 |
| N | 0.59159400  | 1.97788200  | -0.88530200 |
| C | -0.41405500 | 2.75259200  | -1.52660900 |
| C | -0.53341400 | 4.12775300  | -1.30116100 |
| C | -1.34637500 | 2.09005200  | -2.32809500 |
| C | -1.56245900 | 4.83847600  | -1.91297900 |
| C | -2.37809700 | 2.81678900  | -2.92689100 |
| H | -1.27171500 | 1.01621200  | -2.45609000 |
| C | -2.48908700 | 4.19142800  | -2.73257100 |
| H | -3.29908200 | 4.74704400  | -3.18978100 |
| C | -3.34799200 | 2.10458300  | -3.83180000 |
| C | -1.67486800 | 6.32662200  | -1.71389400 |
| F | -2.82365600 | 1.91585200  | -5.07175200 |
| F | -4.49356700 | 2.79796700  | -3.99635900 |
| F | -3.67566000 | 0.88198400  | -3.36068700 |
| F | -1.03060500 | 6.74479000  | -0.60189100 |
| F | -2.96613900 | 6.71943300  | -1.60644200 |
| F | -1.14846100 | 7.00942500  | -2.75585200 |
| S | 2.60244200  | 3.56768400  | -1.75168000 |
| H | 0.15236700  | 4.63283500  | -0.63422000 |
| H | 0.24590500  | 1.05246300  | -0.56280000 |
| H | 2.21705700  | 0.69948200  | 0.42879300  |
| C | 3.91787400  | 1.41721000  | -3.50098500 |
| H | 4.76259700  | 2.08012300  | -3.72179400 |
| H | 3.38273300  | 2.28779000  | -2.70933000 |
| N | -0.35171300 | -1.35375200 | 1.93028000  |
| S | 1.20991900  | -1.49847000 | 1.77512300  |
| O | 1.94158200  | -0.22073900 | 2.01029100  |
| O | 1.69462500  | -2.28363000 | 0.62168200  |
| C | 1.62024500  | -2.54211800 | 3.26568600  |
| F | 1.14159700  | -2.01871900 | 4.39859400  |
| F | 2.95922600  | -2.62142700 | 3.36914000  |
| F | 1.12869300  | -3.77159900 | 3.11461000  |
| C | 3.51952200  | -0.91140500 | -2.57389800 |
| H | 3.11070300  | -1.14923600 | -3.55864300 |
| H | 4.20572400  | -1.70436100 | -2.26000300 |
| H | 2.68003200  | -0.93623900 | -1.86751500 |
| C | 2.95775400  | 1.22462400  | -4.66234400 |
| H | 2.71435600  | 2.19428300  | -5.10670800 |
| H | 3.40498400  | 0.60058400  | -5.44570100 |
| H | 2.02042600  | 0.75513200  | -4.35292300 |
| C | 6.44155100  | 1.13955900  | 0.63296400  |

|   |            |             |             |
|---|------------|-------------|-------------|
| C | 7.54770700 | 1.70197000  | -0.02311000 |
| C | 6.48579800 | 1.09625400  | 2.03841700  |
| C | 8.64743500 | 2.19009000  | 0.68783400  |
| H | 7.58651200 | 1.75598300  | -1.10501700 |
| C | 7.57796100 | 1.58681800  | 2.75124200  |
| H | 5.65803300 | 0.66938800  | 2.59599200  |
| C | 8.66913200 | 2.13837000  | 2.07910200  |
| H | 9.48782600 | 2.61176600  | 0.14274300  |
| H | 7.57368800 | 1.53361600  | 3.83662400  |
| H | 9.52298100 | 2.51940700  | 2.63228300  |
| C | 4.77875200 | -0.79750700 | 0.40544800  |
| H | 3.77992700 | -1.03487600 | 0.03193000  |
| H | 4.62115000 | -0.74775100 | 1.49009400  |
| C | 5.66000900 | -2.01115700 | 0.12510200  |
| C | 6.94304600 | -1.95293700 | -0.27229500 |
| H | 7.40328600 | -0.97512900 | -0.38856400 |
| C | 4.92748900 | -3.30507300 | 0.41019600  |
| H | 4.54808600 | -3.30812700 | 1.43928200  |
| H | 4.03990600 | -3.41183500 | -0.22478800 |
| H | 5.55498100 | -4.18895400 | 0.28070400  |
| C | 7.88831400 | -3.09337100 | -0.54063900 |
| H | 8.32125800 | -3.01128200 | -1.54715200 |
| H | 8.73345000 | -3.06797200 | 0.16129700  |
| H | 7.42093700 | -4.07746600 | -0.46142100 |

TS-EF-6SR

l imaginary frequency

H = -5393.923070

G = -5394.132250

E(M06-2X-DCM) = -5394.853687

|   |             |             |             |
|---|-------------|-------------|-------------|
| O | -0.69430600 | -2.66695000 | -0.52020900 |
| O | -2.70872300 | -1.12201000 | 0.02990600  |
| P | -1.06972300 | -1.15450600 | -0.00827600 |
| O | -0.63728800 | -0.09337300 | -0.96971300 |
| C | -1.84487900 | -3.60173700 | -4.43431600 |
| C | -2.73875400 | -3.73691300 | -3.37703600 |
| C | -2.32108100 | -3.50283100 | -2.05931800 |
| C | -0.09408200 | -2.91031500 | -2.86509200 |
| C | -0.52889300 | -3.22541700 | -4.16483700 |
| C | -3.41598700 | -2.04673300 | 0.79835100  |
| C | -3.62089700 | -3.33773500 | 0.30748100  |
| C | -4.19972500 | -4.30304700 | 1.14783300  |
| C | -4.66640100 | -3.96190400 | 2.41213200  |
| C | -4.56282600 | -2.63780000 | 2.83503300  |

|   |             |             |             |
|---|-------------|-------------|-------------|
| C | -3.93377500 | -1.65721100 | 2.05055600  |
| H | 0.18652000  | -3.14868400 | -4.97831800 |
| H | -4.95918100 | -2.34590900 | 3.80314600  |
| C | -3.40879000 | -3.93510600 | -1.08353600 |
| C | -4.67564000 | -3.74356500 | -1.98483000 |
| H | -4.96788300 | -2.68718700 | -1.95795400 |
| H | -5.52919800 | -4.33546400 | -1.63974500 |
| H | -5.21713500 | -5.93327600 | 0.14325200  |
| H | -3.87364300 | -6.45941600 | 1.15199600  |
| C | -1.03464400 | -3.02542400 | -1.82304700 |
| H | -2.15823800 | -3.79389200 | -5.45751800 |
| H | -5.11675700 | -4.70973700 | 3.05992000  |
| C | -4.20374400 | -4.11623300 | -3.40823500 |
| H | -4.75906600 | -3.58513400 | -4.19002100 |
| H | -4.33462100 | -5.18963500 | -3.60486800 |
| C | -4.20693200 | -5.66042100 | 0.47991200  |
| C | -3.25312100 | -5.44896300 | -0.71377300 |
| H | -2.21917400 | -5.62682700 | -0.39681300 |
| H | -3.46108300 | -6.10930900 | -1.56141500 |
| C | -3.90987100 | -0.24814700 | 2.55818900  |
| C | -3.15920800 | 0.08117600  | 3.71265300  |
| C | -4.74395200 | 0.72499300  | 1.95206100  |
| C | -2.27945600 | -0.84958700 | 4.35181400  |
| C | -3.25824000 | 1.40897200  | 4.27771700  |
| C | -4.80959600 | 2.05842600  | 2.50794900  |
| C | -1.57193800 | -0.50573400 | 5.47278800  |
| H | -2.14586000 | -1.82808700 | 3.91021800  |
| C | -2.51490400 | 1.72168800  | 5.45956100  |
| C | -4.07275800 | 2.36134900  | 3.65725700  |
| C | -1.69853900 | 0.79208100  | 6.04434500  |
| H | -0.88742900 | -1.22277300 | 5.91556500  |
| H | -2.61202300 | 2.72022700  | 5.88008900  |
| H | -4.14869600 | 3.35801100  | 4.08900600  |
| H | -1.13288100 | 1.04341600  | 6.93749000  |
| C | 1.33186600  | -2.51183100 | -2.64790400 |
| C | 1.84175800  | -1.34459700 | -3.27039800 |
| C | 2.19740300  | -3.35209100 | -1.90283300 |
| C | 1.01838700  | -0.43032900 | -4.00652800 |
| C | 3.25115300  | -1.03595600 | -3.16791200 |
| C | 3.59375500  | -3.00276700 | -1.76944600 |
| C | 1.55443200  | 0.66142100  | -4.64127300 |
| H | -0.05023500 | -0.60449800 | -4.04756400 |
| C | 3.77033200  | 0.11163200  | -3.84856800 |
| C | 4.08506900  | -1.86297400 | -2.41112800 |

|   |             |             |             |
|---|-------------|-------------|-------------|
| C | 2.95118400  | 0.93492200  | -4.57405800 |
| H | 0.90429200  | 1.32649200  | -5.20425000 |
| H | 4.83831000  | 0.30723900  | -3.77920700 |
| H | 5.13991100  | -1.61131400 | -2.32038900 |
| H | 3.35926900  | 1.79737600  | -5.09443600 |
| C | -6.37764000 | 1.40142400  | 0.25975300  |
| H | -7.00284000 | 1.15357000  | -0.59395400 |
| C | -5.57369100 | 0.44120800  | 0.81883200  |
| H | -5.57018800 | -0.56233900 | 0.40870200  |
| C | -6.41286400 | 2.72160600  | 0.79269600  |
| H | -7.05396400 | 3.47054600  | 0.33581800  |
| C | -5.65263900 | 3.03397100  | 1.88748100  |
| H | -5.68653400 | 4.03208500  | 2.31914700  |
| C | 2.62150100  | -5.35186600 | -0.56298700 |
| H | 2.25839000  | -6.26584000 | -0.10068600 |
| C | 3.98870900  | -4.98640300 | -0.41125300 |
| H | 4.65460000  | -5.61846900 | 0.16987900  |
| C | 4.45775800  | -3.84630000 | -1.00406600 |
| H | 5.50188900  | -3.55863100 | -0.90730400 |
| C | 1.76107700  | -4.56715600 | -1.28471800 |
| H | 0.72660800  | -4.87008000 | -1.39468200 |
| C | -1.36135900 | 3.50400200  | -1.78236100 |
| C | -1.61179500 | 3.27470100  | -0.26117900 |
| H | -2.55828800 | 3.77182200  | 0.00624300  |
| H | -1.77491200 | 2.20738500  | -0.10795200 |
| C | -0.60652900 | 3.70018500  | 0.78475800  |
| C | 0.14941800  | 3.24216100  | -2.10395200 |
| H | 0.71889000  | 4.16749800  | -2.03331600 |
| H | 0.25413300  | 2.87708400  | -3.12877200 |
| N | 0.79352800  | 2.26275100  | -1.22701700 |
| C | 2.02179300  | 2.39031400  | -0.70246700 |
| N | 2.60286500  | 1.29474400  | -0.18441200 |
| C | 3.93978600  | 1.23338200  | 0.31552500  |
| C | 5.00222200  | 1.37364300  | -0.57467300 |
| C | 4.17452100  | 0.93830200  | 1.66002300  |
| C | 6.31176700  | 1.22087100  | -0.12010500 |
| C | 5.49119000  | 0.80190400  | 2.10383100  |
| H | 3.33981000  | 0.80547800  | 2.34054200  |
| C | 6.56434600  | 0.93947400  | 1.22097900  |
| H | 7.58155800  | 0.82296900  | 1.57394000  |
| C | 5.75336800  | 0.44116300  | 3.54439700  |
| C | 7.42800600  | 1.33457600  | -1.12204900 |
| F | 5.70662900  | -0.89424300 | 3.73939900  |
| F | 4.84479900  | 0.99745800  | 4.37104700  |

|   |             |             |             |
|---|-------------|-------------|-------------|
| F | 6.97766800  | 0.85603300  | 3.94529600  |
| F | 7.22878200  | 0.48807800  | -2.16807700 |
| F | 8.63025600  | 1.03902300  | -0.59062800 |
| F | 7.50852800  | 2.57639200  | -1.64736900 |
| S | 2.78030600  | 3.95369500  | -0.55563500 |
| H | 4.79854000  | 1.57125600  | -1.62098100 |
| H | 2.08807800  | 0.40591700  | -0.12231000 |
| H | 0.35407500  | 1.32428500  | -1.20394700 |
| C | 0.15364600  | 4.87605000  | 0.73621900  |
| H | -0.16479200 | 5.60185700  | -0.01115100 |
| H | 1.25782700  | 4.45332800  | 0.12506700  |
| N | -0.60923600 | -1.09546300 | 1.54119200  |
| S | 0.90779200  | -1.16759400 | 1.99352500  |
| O | 1.19858700  | -0.21647500 | 3.07786200  |
| O | 1.88179000  | -1.21821400 | 0.87037800  |
| C | 1.05562200  | -2.85268200 | 2.79034100  |
| F | 0.75001400  | -3.81446900 | 1.91655200  |
| F | 0.22433700  | -2.94535800 | 3.84099300  |
| F | 2.30780800  | -3.03209000 | 3.22089100  |
| C | -2.25520600 | 2.55865700  | -2.62694200 |
| C | -3.29336500 | 1.78569300  | -2.09170100 |
| C | -2.06828200 | 2.50663000  | -4.02077600 |
| C | -4.09773700 | 0.98705100  | -2.90898800 |
| H | -3.50353100 | 1.78290800  | -1.03003200 |
| C | -2.86601600 | 1.70980600  | -4.83946100 |
| H | -1.29496000 | 3.10802700  | -4.49153800 |
| C | -3.88959500 | 0.94013500  | -4.28481700 |
| H | -4.88762400 | 0.39901300  | -2.45079900 |
| H | -2.68863900 | 1.69612100  | -5.91177100 |
| H | -4.51387000 | 0.31560100  | -4.91798600 |
| C | -1.66721400 | 4.98703700  | -2.23001100 |
| H | -0.94346500 | 5.64923900  | -1.74628300 |
| H | -1.45141700 | 5.05060400  | -3.30425700 |
| C | -3.06538600 | 5.53235600  | -1.97191900 |
| C | -3.27717900 | 6.29703600  | -0.88577500 |
| H | -2.42325300 | 6.48781200  | -0.23278400 |
| C | -0.51677100 | 2.77931900  | 1.95910000  |
| H | 0.32589400  | 2.98613200  | 2.61940600  |
| H | -1.43792100 | 2.88782300  | 2.55400300  |
| H | -0.48678000 | 1.72699300  | 1.66206600  |
| C | -4.12954400 | 5.22393000  | -3.00064100 |
| H | -5.02506200 | 5.83545400  | -2.86767300 |
| H | -3.74707200 | 5.40890100  | -4.01248400 |
| H | -4.43301600 | 4.17226000  | -2.97061700 |



|   |             |            |             |
|---|-------------|------------|-------------|
| C | 0.76674100  | 5.52691600 | 1.97601100  |
| H | 1.43749100  | 6.33554100 | 1.66979700  |
| H | -0.01018500 | 5.95823300 | 2.61780000  |
| H | 1.35272400  | 4.82535300 | 2.57451700  |
| C | -4.55147300 | 6.94762300 | -0.42544500 |
| H | -4.41425700 | 8.03041700 | -0.30265900 |
| H | -5.38903400 | 6.79051800 | -1.10916100 |
| H | -4.85115700 | 6.55819900 | 0.55746200  |

TS-EF-6SR-1

l imaginary frequency

H = -5393.921813

G = -5394.131185

E(M06-2X-DCM) = -5394.850838

|   |             |             |             |
|---|-------------|-------------|-------------|
| O | -1.31904700 | -2.66315400 | -0.73512100 |
| O | -2.99436500 | -0.81211000 | -0.03832500 |
| P | -1.39613400 | -1.14087900 | -0.13139000 |
| O | -0.81897100 | -0.11379900 | -1.05842700 |
| C | -2.65282700 | -3.07861800 | -4.68001600 |
| C | -3.55317900 | -3.10372600 | -3.61969100 |
| C | -3.09497900 | -3.05528600 | -2.29464300 |
| C | -0.79540400 | -2.87162300 | -3.09759300 |
| C | -1.28620500 | -3.00022700 | -4.40832300 |
| C | -3.85852300 | -1.63465600 | 0.68373700  |
| C | -4.33074800 | -2.81081800 | 0.09988800  |
| C | -5.09155700 | -3.69875000 | 0.87729500  |
| C | -5.46672900 | -3.36777200 | 2.17466000  |
| C | -5.07731800 | -2.13606200 | 2.69829200  |
| C | -4.25900100 | -1.24910500 | 1.97837500  |
| H | -0.57201400 | -3.01459500 | -5.22646200 |
| H | -5.39064700 | -1.85010800 | 3.69792500  |
| C | -4.24890900 | -3.32864100 | -1.33582700 |
| C | -5.44979200 | -2.81545600 | -2.20044800 |
| H | -5.52178100 | -1.72681000 | -2.09148200 |
| H | -6.40587400 | -3.24525700 | -1.88585500 |
| H | -6.42838300 | -4.99889500 | -0.23030100 |
| H | -5.22207600 | -5.86960100 | 0.71093400  |
| C | -1.73730300 | -2.86490700 | -2.05027300 |
| H | -3.00203700 | -3.12818700 | -5.70839500 |
| H | -6.06161100 | -4.05269900 | 2.77362500  |
| C | -5.06513400 | -3.17076600 | -3.65437500 |
| H | -5.49949300 | -2.48104700 | -4.38727100 |
| H | -5.41411100 | -4.17693500 | -3.92578500 |
| C | -5.38306100 | -4.96847100 | 0.10827400  |

|   |             |             |             |
|---|-------------|-------------|-------------|
| C | -4.40781300 | -4.86645000 | -1.08292300 |
| H | -3.43234000 | -5.27691800 | -0.79799700 |
| H | -4.74880000 | -5.40309800 | -1.97371100 |
| C | -3.90032500 | 0.06283300  | 2.60483900  |
| C | -3.12682600 | 0.08805500  | 3.79182800  |
| C | -4.42972500 | 1.26754400  | 2.07600500  |
| C | -2.50894000 | -1.08245500 | 4.33839000  |
| C | -2.91962500 | 1.33965000  | 4.48563100  |
| C | -4.18404200 | 2.51727900  | 2.76124000  |
| C | -1.77560700 | -1.02782700 | 5.49395600  |
| H | -2.59248600 | -2.01715100 | 3.79910500  |
| C | -2.16442700 | 1.34911800  | 5.70063800  |
| C | -3.45249200 | 2.51703900  | 3.95271900  |
| C | -1.61200900 | 0.19971500  | 6.19614300  |
| H | -1.29388700 | -1.92672600 | 5.86724600  |
| H | -2.03320000 | 2.29720200  | 6.21757300  |
| H | -3.29850100 | 3.45654900  | 4.48105400  |
| H | -1.03264600 | 0.22076500  | 7.11522200  |
| C | 0.67932800  | -2.78408800 | -2.85978500 |
| C | 1.41881500  | -1.68806200 | -3.36959100 |
| C | 1.34739100  | -3.83943100 | -2.18894800 |
| C | 0.80829800  | -0.58470100 | -4.05146300 |
| C | 2.85571000  | -1.65592400 | -3.20589100 |
| C | 2.77905500  | -3.77646600 | -2.00427200 |
| C | 1.55881000  | 0.43853300  | -4.57204300 |
| H | -0.27078700 | -0.56381800 | -4.14688300 |
| C | 3.60156400  | -0.56548600 | -3.75741200 |
| C | 3.49300700  | -2.69161500 | -2.51894100 |
| C | 2.97685900  | 0.45011900  | -4.43078400 |
| H | 1.06769100  | 1.25305600  | -5.09848200 |
| H | 4.68255000  | -0.56755800 | -3.63333400 |
| H | 4.57302800  | -2.65810900 | -2.39048700 |
| H | 3.55525800  | 1.26533100  | -4.85753200 |
| C | -5.72082500 | 2.49646600  | 0.39981100  |
| H | -6.31789800 | 2.49955900  | -0.50773400 |
| C | -5.23311500 | 1.31364400  | 0.89103800  |
| H | -5.45874500 | 0.38730500  | 0.37590100  |
| C | -5.45458700 | 3.72612100  | 1.06618300  |
| H | -5.85211900 | 4.65395400  | 0.66358600  |
| C | -4.71366100 | 3.72995600  | 2.21720600  |
| H | -4.51883000 | 4.65882200  | 2.74915100  |
| C | 1.34647600  | -6.00380200 | -1.05308300 |
| H | 0.80429200  | -6.87317700 | -0.69085300 |
| C | 2.75281600  | -5.92171400 | -0.84988900 |

|   |             |             |             |
|---|-------------|-------------|-------------|
| H | 3.27018500  | -6.72268600 | -0.32894200 |
| C | 3.44554400  | -4.83889300 | -1.31816100 |
| H | 4.52158300  | -4.76549400 | -1.17983800 |
| C | 0.67108800  | -5.00235000 | -1.69982000 |
| H | -0.39837400 | -5.09018600 | -1.85149500 |
| C | -0.68597400 | 3.92077300  | -1.50238200 |
| C | -1.04388700 | 3.62260600  | -0.00314700 |
| H | -1.73991900 | 4.39986900  | 0.33389000  |
| H | -1.60715300 | 2.68894800  | 0.02421700  |
| C | 0.03939300  | 3.53426700  | 1.04904900  |
| C | 0.37798000  | 2.86462500  | -2.03432300 |
| H | 1.18632500  | 3.39188500  | -2.54289700 |
| H | -0.10393100 | 2.21266600  | -2.76308500 |
| N | 0.98376200  | 1.94715200  | -1.06121000 |
| C | 2.26775500  | 1.93526000  | -0.67857400 |
| N | 2.76634200  | 0.78725200  | -0.18748400 |
| C | 4.09403300  | 0.58008400  | 0.28646800  |
| C | 5.18064600  | 0.78475700  | -0.56467700 |
| C | 4.28859900  | 0.08474600  | 1.57817300  |
| C | 6.47150600  | 0.51417600  | -0.11360100 |
| C | 5.58774400  | -0.18367600 | 2.01450900  |
| H | 3.43602800  | -0.09115300 | 2.22682900  |
| C | 6.68317700  | 0.03202000  | 1.17787300  |
| H | 7.68682800  | -0.18136200 | 1.52503700  |
| C | 5.80202000  | -0.76591600 | 3.38929100  |
| C | 7.63454900  | 0.77064700  | -1.03501800 |
| F | 5.69066800  | -2.11193600 | 3.37998000  |
| F | 4.90100800  | -0.29652500 | 4.27531400  |
| F | 7.03427900  | -0.47442000 | 3.86537200  |
| F | 7.32639400  | 0.45630900  | -2.31647800 |
| F | 8.72125500  | 0.04925000  | -0.68980200 |
| F | 8.00110800  | 2.07135900  | -1.03040200 |
| S | 3.19061400  | 3.41633000  | -0.66462600 |
| H | 5.01225000  | 1.12349100  | -1.57983900 |
| H | 2.15346200  | -0.03895800 | -0.09214600 |
| H | 0.44227500  | 1.06781200  | -0.95904000 |
| C | 1.01812000  | 4.50963200  | 1.20224100  |
| H | 0.81934000  | 5.45092800  | 0.69122200  |
| H | 1.96444700  | 4.02969500  | 0.26941700  |
| N | -0.87833600 | -1.25232900 | 1.39526400  |
| S | 0.62692200  | -1.54747600 | 1.78844400  |
| O | 1.06977600  | -0.73209500 | 2.92963600  |
| O | 1.56221000  | -1.62195600 | 0.62995800  |
| C | 0.58158600  | -3.29800700 | 2.44369100  |

|   |             |             |             |
|---|-------------|-------------|-------------|
| F | 0.13134600  | -4.13677500 | 1.50897200  |
| F | -0.22427700 | -3.36825400 | 3.51311000  |
| F | 1.81319400  | -3.66585200 | 2.80949000  |
| C | -1.97577400 | 3.72361700  | -2.34478200 |
| C | -2.63245100 | 2.47886000  | -2.32597600 |
| C | -2.50014000 | 4.71855800  | -3.18223700 |
| C | -3.77088300 | 2.24998000  | -3.09681700 |
| H | -2.24636700 | 1.65774400  | -1.72866100 |
| C | -3.64099900 | 4.48982200  | -3.95695100 |
| H | -2.03611600 | 5.69631300  | -3.23098100 |
| C | -4.28503800 | 3.25555600  | -3.91708700 |
| H | -4.24753400 | 1.27419700  | -3.05737000 |
| H | -4.02025100 | 5.28533900  | -4.59340900 |
| H | -5.17083800 | 3.07671800  | -4.52100100 |
| C | -0.04199000 | 5.32366400  | -1.73760200 |
| H | 1.00186300  | 5.25724000  | -1.41466300 |
| H | 0.04161600  | 5.45417300  | -2.82797300 |
| C | -0.59779800 | 6.62091500  | -1.15783300 |
| C | -1.84873700 | 6.78977800  | -0.69765600 |
| H | -2.53323600 | 5.94669700  | -0.75192000 |
| C | -0.06383900 | 2.38310600  | 2.00076800  |
| H | 0.87925300  | 2.12740700  | 2.48792800  |
| H | -0.76764600 | 2.66011700  | 2.80175200  |
| H | -0.47365900 | 1.48469700  | 1.53682900  |
| C | 0.43134400  | 7.73161100  | -1.20990100 |
| H | 0.03873300  | 8.70015300  | -0.89548400 |
| H | 1.30019800  | 7.50143900  | -0.57717500 |
| H | 0.81952000  | 7.84650000  | -2.23126100 |
| C | 1.87853200  | 4.65208000  | 2.44988900  |
| H | 2.70808900  | 5.33986000  | 2.25788600  |
| H | 1.29359000  | 5.05974600  | 3.28358400  |
| H | 2.30837900  | 3.70157900  | 2.77698300  |
| C | -2.47340300 | 8.03199600  | -0.12322100 |
| H | -3.33327400 | 8.34740700  | -0.72987900 |
| H | -2.86300600 | 7.83541100  | 0.88478900  |
| H | -1.78663800 | 8.87869100  | -0.05276700 |

TS-EF-6SR-2

l imaginary frequency

H = -5393.919749

G = -5394.126859

E(M06-2X-DCM) = -5394.845115

|   |             |             |            |
|---|-------------|-------------|------------|
| 0 | -0.96641300 | -2.99280800 | 0.28148800 |
| 0 | -2.47773000 | -0.93142200 | 0.68468000 |

|   |             |             |             |
|---|-------------|-------------|-------------|
| P | -0.90675200 | -1.37716300 | 0.54573600  |
| O | -0.30507100 | -0.62117600 | -0.60285300 |
| C | -3.45913900 | -4.69074300 | -2.62151400 |
| C | -3.94248400 | -4.39371600 | -1.35170400 |
| C | -3.09733500 | -3.85825300 | -0.36843200 |
| C | -1.25245100 | -3.85923800 | -1.96668200 |
| C | -2.11950900 | -4.43801100 | -2.90992600 |
| C | -3.18146300 | -1.31322200 | 1.83012800  |
| C | -3.60116900 | -2.63258700 | 1.98287000  |
| C | -4.03608200 | -3.06610300 | 3.24481100  |
| C | -4.19856200 | -2.15872800 | 4.28688900  |
| C | -3.96231700 | -0.80290900 | 4.04681900  |
| C | -3.44796800 | -0.34950500 | 2.82198200  |
| H | -1.72382900 | -4.67739900 | -3.89266800 |
| H | -4.16236800 | -0.07151000 | 4.82469500  |
| C | -3.83630500 | -3.74133800 | 0.96029900  |
| C | -5.31683000 | -3.65959600 | 0.44072600  |
| H | -5.53137100 | -2.62181300 | 0.16038000  |
| H | -6.04336800 | -3.95513400 | 1.20353100  |
| H | -5.34008900 | -4.80390700 | 3.29863800  |
| H | -3.78638600 | -5.06378700 | 4.08233400  |
| C | -1.77592000 | -3.55559600 | -0.69535300 |
| H | -4.11265200 | -5.11075800 | -3.38194100 |
| H | -4.53617200 | -2.48882900 | 5.26617000  |
| C | -5.34840900 | -4.54763700 | -0.81863900 |
| H | -6.11168600 | -4.23494600 | -1.54029300 |
| H | -5.56331800 | -5.59554000 | -0.56472200 |
| C | -4.26962700 | -4.56378300 | 3.23497000  |
| C | -3.67243500 | -4.99794100 | 1.87403400  |
| H | -2.60446100 | -5.21557700 | 1.98717300  |
| H | -4.15470700 | -5.88687200 | 1.45433600  |
| C | -3.31996300 | 1.11977900  | 2.55669100  |
| C | -2.34393500 | 1.90528600  | 3.21245400  |
| C | -4.26461700 | 1.73464200  | 1.69432200  |
| C | -1.36328600 | 1.34060200  | 4.08793400  |
| C | -2.30864000 | 3.33464000  | 2.99376400  |
| C | -4.20805200 | 3.16197600  | 1.47397900  |
| C | -0.43243300 | 2.12741700  | 4.71441700  |
| H | -1.34911900 | 0.26795900  | 4.22867000  |
| C | -1.32360600 | 4.11955800  | 3.67147800  |
| C | -3.23361400 | 3.92199200  | 2.12743000  |
| C | -0.41442400 | 3.53679900  | 4.51222900  |
| H | 0.31131000  | 1.66836500  | 5.35826300  |
| H | -1.31685600 | 5.19397100  | 3.50186800  |

|   |             |             |             |
|---|-------------|-------------|-------------|
| H | -3.19173800 | 4.99418600  | 1.95186300  |
| H | 0.32929600  | 4.14411200  | 5.02180300  |
| C | 0.17270000  | -3.62897700 | -2.36066200 |
| C | 0.46904600  | -2.69960600 | -3.38738300 |
| C | 1.20446800  | -4.42080700 | -1.79996500 |
| C | -0.51689200 | -1.82444800 | -3.94979600 |
| C | 1.81710800  | -2.60561400 | -3.89974700 |
| C | 2.55629600  | -4.28596600 | -2.29340600 |
| C | -0.21106800 | -0.95843200 | -4.96844100 |
| H | -1.52234700 | -1.83991300 | -3.54652300 |
| C | 2.08997700  | -1.70761200 | -4.98052500 |
| C | 2.82276200  | -3.39642300 | -3.33788100 |
| C | 1.10774900  | -0.90980600 | -5.50586000 |
| H | -0.97758400 | -0.29865400 | -5.36298200 |
| H | 3.10079900  | -1.68192200 | -5.38309400 |
| H | 3.83684000  | -3.32519400 | -3.72737000 |
| H | 1.32691000  | -0.24080800 | -6.33443100 |
| C | -6.20799700 | 1.63379200  | 0.21072700  |
| H | -6.99054000 | 1.05441600  | -0.27225000 |
| C | -5.31019100 | 1.00878400  | 1.03656900  |
| H | -5.39421500 | -0.05817700 | 1.20708200  |
| C | -6.13022000 | 3.03589300  | -0.02064500 |
| H | -6.84717500 | 3.51435600  | -0.68257300 |
| C | -5.15881800 | 3.77514300  | 0.59861000  |
| H | -5.08707200 | 4.84612400  | 0.43066000  |
| C | 1.98717100  | -6.14211300 | -0.25298300 |
| H | 1.77925600  | -6.86296400 | 0.53291000  |
| C | 3.32019200  | -5.99106200 | -0.72954600 |
| H | 4.11525500  | -6.59827300 | -0.30480100 |
| C | 3.59202400  | -5.09051500 | -1.72346100 |
| H | 4.60366500  | -4.97056100 | -2.10435800 |
| C | 0.96813100  | -5.38809100 | -0.77165200 |
| H | -0.04023500 | -5.51920700 | -0.39772100 |
| C | 5.30319700  | 1.71311800  | 0.00843100  |
| C | 5.41828700  | 2.27740300  | -1.45264800 |
| H | 5.40478100  | 3.37137400  | -1.39927700 |
| H | 6.41378200  | 2.00670200  | -1.83326600 |
| C | 4.44028400  | 1.85043300  | -2.50589400 |
| C | 3.92608600  | 2.11447000  | 0.61540400  |
| H | 3.90342900  | 3.20225800  | 0.69426300  |
| H | 3.84233200  | 1.70670200  | 1.62489900  |
| N | 2.70460000  | 1.70475900  | -0.10162200 |
| C | 1.74189800  | 2.55440200  | -0.55035300 |
| N | 0.51284600  | 2.02934900  | -0.71565300 |

|   |             |             |             |
|---|-------------|-------------|-------------|
| C | -0.61471400 | 2.63519600  | -1.33835300 |
| C | -1.04171300 | 3.93127700  | -1.03490100 |
| C | -1.34659700 | 1.85046700  | -2.23569900 |
| C | -2.16541800 | 4.45185300  | -1.67641500 |
| C | -2.48041100 | 2.38034500  | -2.85193300 |
| H | -1.03860100 | 0.82836500  | -2.42438600 |
| C | -2.89102600 | 3.68593100  | -2.58859200 |
| H | -3.77663300 | 4.09005300  | -3.06315100 |
| C | -3.22926200 | 1.54408400  | -3.85531600 |
| C | -2.57334000 | 5.87622400  | -1.40922500 |
| F | -2.64511500 | 1.60285200  | -5.08305900 |
| F | -4.50306700 | 1.95816100  | -4.01305900 |
| F | -3.26120500 | 0.24025900  | -3.50753900 |
| F | -2.26212000 | 6.26725700  | -0.15153100 |
| F | -3.90424300 | 6.06099900  | -1.57071300 |
| F | -1.95571000 | 6.73786200  | -2.24918100 |
| S | 2.13563500  | 4.17935300  | -1.00542100 |
| H | -0.51925900 | 4.52106600  | -0.29529900 |
| H | 0.35880600  | 1.01921600  | -0.51781100 |
| H | 2.33958800  | 0.81835400  | 0.26036600  |
| C | 3.83909500  | 2.89146600  | -3.25172600 |
| H | 4.47645100  | 3.78225400  | -3.31907100 |
| H | 3.13121200  | 3.37652400  | -2.34954200 |
| N | -0.25177100 | -1.25468300 | 2.01804500  |
| S | 1.31320100  | -1.30496400 | 2.22187500  |
| O | 1.96485900  | 0.03120500  | 2.10681100  |
| O | 2.02663500  | -2.40979100 | 1.55632800  |
| C | 1.41068600  | -1.72009700 | 4.03709300  |
| F | 0.79273300  | -0.81056200 | 4.80272200  |
| F | 2.70363800  | -1.75700200 | 4.38735700  |
| F | 0.86664600  | -2.91609300 | 4.26731900  |
| C | 5.64043700  | 0.21147100  | 0.02923800  |
| C | 6.85249500  | -0.23376900 | -0.53264700 |
| C | 4.79554600  | -0.75484500 | 0.58972600  |
| C | 7.19529200  | -1.58416300 | -0.54599100 |
| H | 7.55438000  | 0.47745500  | -0.96218500 |
| C | 5.12840000  | -2.11382000 | 0.56710300  |
| H | 3.86478600  | -0.47822600 | 1.06810200  |
| C | 6.32832200  | -2.53448100 | -0.00107200 |
| H | 8.14099400  | -1.89245300 | -0.98490000 |
| H | 4.42407400  | -2.82315700 | 0.98896600  |
| H | 6.58776100  | -3.58945700 | -0.01976900 |
| C | 6.37999300  | 2.52301600  | 0.83438200  |
| H | 6.21313600  | 3.58681400  | 0.62495800  |

|   |            |             |             |
|---|------------|-------------|-------------|
| H | 7.36629300 | 2.27515500  | 0.42027300  |
| C | 4.16777200 | 0.41628800  | -2.79292500 |
| H | 3.29030600 | 0.26990900  | -3.42350100 |
| H | 5.03909700 | 0.03063800  | -3.34909900 |
| H | 4.09220200 | -0.19889400 | -1.89627700 |
| C | 6.41331800 | 2.33604200  | 2.34404100  |
| C | 5.95096300 | 3.32476200  | 3.12929100  |
| H | 5.55201700 | 4.21201600  | 2.63402200  |
| C | 7.03369000 | 1.06149900  | 2.86851200  |
| H | 6.39389900 | 0.19060200  | 2.68899700  |
| H | 7.98384100 | 0.85725800  | 2.35840300  |
| H | 7.23479100 | 1.11053700  | 3.94100600  |
| C | 2.98317000 | 2.65712900  | -4.48690500 |
| H | 2.50666100 | 3.59549600  | -4.78487900 |
| H | 3.58846500 | 2.30510000  | -5.33044700 |
| H | 2.18970200 | 1.92496600  | -4.31269200 |
| C | 5.89492900 | 3.38552900  | 4.62919100  |
| H | 6.32333000 | 2.50612500  | 5.11580100  |
| H | 6.42569200 | 4.27192200  | 5.00227600  |
| H | 4.85511100 | 3.47829200  | 4.97095600  |

TS-EF-6SR-3

l imaginary frequency

H = -5393.918340

G = -5394.124596

E(M06-2X-DCM) = -5394.843634

|   |            |             |             |
|---|------------|-------------|-------------|
| O | 1.40870300 | -2.84842100 | -0.34905700 |
| O | 2.58706900 | -0.60404100 | -0.86051100 |
| P | 1.11081600 | -1.25180800 | -0.56609900 |
| O | 0.53923600 | -0.57645700 | 0.64381700  |
| C | 4.30978300 | -4.17976800 | 2.35864700  |
| C | 4.66229100 | -3.79933200 | 1.06808800  |
| C | 3.68451300 | -3.39770400 | 0.14568700  |
| C | 1.96328200 | -3.70943200 | 1.84813500  |
| C | 2.96591900 | -4.15309500 | 2.72763600  |
| C | 3.22707500 | -0.90143800 | -2.06524300 |
| C | 3.83580700 | -2.14188500 | -2.23971500 |
| C | 4.23430900 | -2.52967800 | -3.52826100 |
| C | 4.16259500 | -1.63394000 | -4.59035000 |
| C | 3.72344100 | -0.33024400 | -4.34829700 |
| C | 3.24436600 | 0.06533200  | -3.08946200 |
| H | 2.67265200 | -4.46912500 | 3.72453200  |
| H | 3.73352000 | 0.40270500  | -5.14997400 |
| C | 4.31126500 | -3.18016700 | -1.22738000 |



|   |              |              |              |
|---|--------------|--------------|--------------|
| C | 5. 78971100  | -2. 86336800 | -0. 80401900 |
| H | 5. 85626000  | -1. 80270300 | -0. 53534700 |
| H | 6. 50378000  | -3. 04751300 | -1. 61241100 |
| H | 5. 79783400  | -4. 03230400 | -3. 65899600 |
| H | 4. 25793900  | -4. 55857800 | -4. 32819400 |
| C | 2. 35603500  | -3. 30363900 | 0. 55831500  |
| H | 5. 06653000  | -4. 49614800 | 3. 07210400  |
| H | 4. 47153100  | -1. 92890200 | -5. 59011400 |
| C | 6. 03949600  | -3. 72754900 | 0. 44836000  |
| H | 6. 78480400  | -3. 29147900 | 1. 12332300  |
| H | 6. 40522400  | -4. 72846700 | 0. 17795600  |
| C | 4. 70929600  | -3. 96870100 | -3. 52203100 |
| C | 4. 28647000  | -4. 46442400 | -2. 11821200 |
| H | 3. 26132400  | -4. 85021500 | -2. 15236500 |
| H | 4. 93147800  | -5. 25793900 | -1. 72695200 |
| C | 2. 88774800  | 1. 49855200  | -2. 83770200 |
| C | 1. 75180000  | 2. 08973200  | -3. 43840500 |
| C | 3. 76879000  | 2. 28809400  | -2. 05367700 |
| C | 0. 82528400  | 1. 34465900  | -4. 23490900 |
| C | 1. 48959100  | 3. 49883100  | -3. 24265700 |
| C | 3. 48553800  | 3. 69129200  | -1. 85430800 |
| C | -0. 26114400 | 1. 94757400  | -4. 81269200 |
| H | 0. 97939900  | 0. 27986000  | -4. 35161400 |
| C | 0. 34692000  | 4. 08927000  | -3. 86828300 |
| C | 2. 35447400  | 4. 25700300  | -2. 45009800 |
| C | -0. 50166000 | 3. 33991000  | -4. 63708600 |
| H | -0. 95778100 | 1. 35272300  | -5. 39515600 |
| H | 0. 17107200  | 5. 15226200  | -3. 71842300 |
| H | 2. 14595200  | 5. 31289100  | -2. 29389500 |
| H | -1. 36612300 | 3. 80033900  | -5. 10867300 |
| C | 0. 54055900  | -3. 73141100 | 2. 31081200  |
| C | 0. 13664000  | -2. 88909100 | 3. 37461900  |
| C | -0. 36716700 | -4. 67263200 | 1. 76589200  |
| C | 0. 99188600  | -1. 88625300 | 3. 93694600  |
| C | -1. 19097400 | -3. 02487400 | 3. 92991800  |
| C | -1. 70419700 | -4. 77076200 | 2. 30567700  |
| C | 0. 59055900  | -1. 11226800 | 4. 99578500  |
| H | 1. 97266000  | -1. 73125400 | 3. 50389400  |
| C | -1. 56624600 | -2. 20915300 | 5. 04447200  |
| C | -2. 07532700 | -3. 95504800 | 3. 37784800  |
| C | -0. 70151400 | -1. 28601600 | 5. 57095300  |
| H | 1. 25950400  | -0. 35518800 | 5. 39314900  |
| H | -2. 55634600 | -2. 35076000 | 5. 47349300  |
| H | -3. 07388700 | -4. 05598000 | 3. 79957700  |

|   |             |             |             |
|---|-------------|-------------|-------------|
| H | -0.99430500 | -0.68425600 | 6.42778100  |
| C | 5.79665500  | 2.55915000  | -0.71117600 |
| H | 6.69707800  | 2.13393300  | -0.27554000 |
| C | 4.96441600  | 1.76814900  | -1.45978900 |
| H | 5.21713500  | 0.72612800  | -1.61745400 |
| C | 5.49784600  | 3.93441100  | -0.49966900 |
| H | 6.16579300  | 4.54651100  | 0.10051400  |
| C | 4.37526500  | 4.48111200  | -1.06029800 |
| H | 4.13662700  | 5.53007200  | -0.91053800 |
| C | -0.91105700 | -6.47728500 | 0.21115100  |
| H | -0.61444700 | -7.14448200 | -0.59363800 |
| C | -2.23333900 | -6.55428000 | 0.73274300  |
| H | -2.93359600 | -7.27587500 | 0.32045900  |
| C | -2.61343500 | -5.72552100 | 1.75263000  |
| H | -3.61756700 | -5.77880400 | 2.16712800  |
| C | -0.01204600 | -5.57271300 | 0.71103800  |
| H | 0.99132300  | -5.53290400 | 0.30398800  |
| C | -5.46607200 | 1.35268300  | 0.29486200  |
| C | -5.53024200 | 1.63890700  | 1.83325200  |
| H | -5.61936100 | 2.72179100  | 1.97332000  |
| H | -6.46707100 | 1.21289100  | 2.21856800  |
| C | -4.43884300 | 1.14252700  | 2.73657200  |
| C | -4.15383000 | 1.95480100  | -0.28739300 |
| H | -4.20615400 | 3.03744500  | -0.16671500 |
| H | -4.10283300 | 1.73519000  | -1.35652600 |
| N | -2.86501000 | 1.52137300  | 0.28497700  |
| C | -1.94413300 | 2.35978600  | 0.82398300  |
| N | -0.66975500 | 1.92796600  | 0.87242800  |
| C | 0.43334500  | 2.61329700  | 1.46086200  |
| C | 0.72913100  | 3.94126900  | 1.14134300  |
| C | 1.26940500  | 1.89637000  | 2.32042300  |
| C | 1.83085500  | 4.56145400  | 1.72819100  |
| C | 2.38082400  | 2.52673100  | 2.88323000  |
| H | 1.06296300  | 0.85106100  | 2.51831400  |
| C | 2.66247900  | 3.86223900  | 2.60313100  |
| H | 3.52996600  | 4.34352400  | 3.03717000  |
| C | 3.24917500  | 1.75939200  | 3.84458000  |
| C | 2.09665100  | 6.01559300  | 1.44406600  |
| F | 2.69200000  | 1.71007000  | 5.08464700  |
| F | 4.46767600  | 2.31960900  | 3.98904400  |
| F | 3.43069300  | 0.48002400  | 3.45370300  |
| F | 1.73514300  | 6.36039900  | 0.18493200  |
| F | 3.40339100  | 6.33016500  | 1.58828400  |
| F | 1.40436500  | 6.82201100  | 2.28066900  |

|   |             |             |             |
|---|-------------|-------------|-------------|
| S | -2.43083900 | 3.86218300  | 1.55143200  |
| H | 0.11998400  | 4.48008100  | 0.42812600  |
| H | -0.43004300 | 0.95933400  | 0.58458100  |
| H | -2.46644900 | 0.72456100  | -0.23150600 |
| C | -3.88949700 | 2.09617700  | 3.61641300  |
| H | -4.58602500 | 2.90977700  | 3.85351200  |
| H | -3.27595700 | 2.79756700  | 2.75135000  |
| N | 0.28943900  | -1.21929800 | -1.96065200 |
| S | -1.28416000 | -1.32406800 | -1.95556400 |
| O | -1.95702300 | 0.00973200  | -1.92272700 |
| O | -1.88564900 | -2.34689500 | -1.08327300 |
| C | -1.59851800 | -1.94701700 | -3.68455600 |
| F | -1.10486100 | -1.13079100 | -4.62371200 |
| F | -2.92917000 | -2.03417100 | -3.86040700 |
| F | -1.06604600 | -3.15857400 | -3.84466800 |
| C | -5.71800400 | -0.13498400 | -0.01120200 |
| C | -6.81139900 | -0.79386900 | 0.58524700  |
| C | -4.94520300 | -0.86548200 | -0.92026800 |
| C | -7.10558300 | -2.12456900 | 0.29807900  |
| H | -7.46407400 | -0.26612000 | 1.27654800  |
| C | -5.23017400 | -2.20560700 | -1.20398100 |
| H | -4.09951900 | -0.41593000 | -1.42445500 |
| C | -6.30907600 | -2.84176200 | -0.59811300 |
| H | -7.95795800 | -2.60042400 | 0.77651100  |
| H | -4.58522100 | -2.73947900 | -1.89316000 |
| H | -6.52885900 | -3.88309500 | -0.81680600 |
| C | -6.65269200 | 2.19724500  | -0.32676800 |
| H | -6.55934300 | 3.22538300  | 0.04886700  |
| H | -7.58031100 | 1.79739700  | 0.09660400  |
| C | -4.01003500 | -0.28527000 | 2.73779700  |
| H | -3.05395000 | -0.43867100 | 3.24080600  |
| H | -4.76837300 | -0.84825400 | 3.30777800  |
| H | -3.98456000 | -0.73164400 | 1.74360300  |
| C | -6.76993500 | 2.24045500  | -1.84711800 |
| C | -7.40503500 | 1.25146400  | -2.49736800 |
| H | -7.80887800 | 0.43784900  | -1.89533100 |
| C | -6.20441200 | 3.47251500  | -2.51864600 |
| H | -6.68174700 | 4.37842500  | -2.11928400 |
| H | -5.12809200 | 3.58695100  | -2.34038400 |
| H | -6.35610400 | 3.47071400  | -3.59993200 |
| C | -2.92963000 | 1.76203900  | 4.74548000  |
| H | -2.50168700 | 2.68464500  | 5.14847100  |
| H | -3.44585100 | 1.24616300  | 5.56378300  |
| H | -2.10180500 | 1.12670100  | 4.42026000  |

|   |             |            |             |
|---|-------------|------------|-------------|
| C | -7.63508500 | 1.09229800 | -3.97316600 |
| H | -7.22156800 | 1.90767200 | -4.57174200 |
| H | -7.18544700 | 0.15570700 | -4.32919900 |
| H | -8.70934200 | 1.02474100 | -4.19321600 |

TS-EF-6SR-4

l imaginary frequency

H = -5393.917765

G = -5394.123710

E(M06-2X-DCM) = -5394.842319

|   |            |             |             |
|---|------------|-------------|-------------|
| O | 2.26560700 | -2.40149500 | -0.24377800 |
| O | 2.78233900 | 0.10662500  | -0.60650600 |
| P | 1.53884200 | -0.95690700 | -0.51050800 |
| O | 0.63923900 | -0.52116100 | 0.60623900  |
| C | 5.03307900 | -2.90291900 | 2.85623600  |
| C | 5.42928300 | -2.39418200 | 1.62385400  |
| C | 4.51171500 | -2.27025500 | 0.56991600  |
| C | 2.74559600 | -3.13169200 | 2.01765600  |
| C | 3.70484700 | -3.28681700 | 3.03324800  |
| C | 3.63814500 | 0.04867500  | -1.70805800 |
| C | 4.60572700 | -0.95045700 | -1.78346500 |
| C | 5.27249900 | -1.16249200 | -3.00003000 |
| C | 5.08256200 | -0.29550600 | -4.07132700 |
| C | 4.24753200 | 0.81191300  | -3.90627000 |
| C | 3.50682700 | 1.00905900  | -2.73016700 |
| H | 3.38556500 | -3.70724800 | 3.98245500  |
| H | 4.14818200 | 1.53983200  | -4.70643700 |
| C | 5.22625000 | -1.83321400 | -0.70422900 |
| C | 6.47170000 | -1.10727400 | -0.08189900 |
| H | 6.18294200 | -0.08343300 | 0.18265300  |
| H | 7.31140900 | -1.04634800 | -0.78082200 |
| H | 7.21493100 | -2.12978500 | -2.89592300 |
| H | 6.00762700 | -3.06696700 | -3.76785000 |
| C | 3.17209300 | -2.58651400 | 0.79152700  |
| H | 5.74476900 | -3.00390800 | 3.67176600  |
| H | 5.59776900 | -0.45464100 | -5.01536800 |
| C | 6.79390200 | -1.89858600 | 1.20174500  |
| H | 7.27673000 | -1.28351800 | 1.96972400  |
| H | 7.47383500 | -2.73745000 | 0.99505200  |
| C | 6.14874300 | -2.39574400 | -2.91279000 |
| C | 5.70563700 | -3.03850900 | -1.57659700 |
| H | 4.85598700 | -3.70877000 | -1.74912900 |
| H | 6.49779000 | -3.61779400 | -1.09113000 |
| C | 2.71266600 | 2.26611400  | -2.54588100 |

|   |              |              |              |
|---|--------------|--------------|--------------|
| C | 1. 54601300  | 2. 51656500  | -3. 30542900 |
| C | 3. 20759000  | 3. 25556600  | -1. 65683900 |
| C | 0. 99638700  | 1. 55639900  | -4. 21313700 |
| C | 0. 85789200  | 3. 78132000  | -3. 16580600 |
| C | 2. 50092500  | 4. 50854900  | -1. 51663600 |
| C | -0. 12939500 | 1. 83207600  | -4. 94410700 |
| H | 1. 47014200  | 0. 58670500  | -4. 29320900 |
| C | -0. 31105500 | 4. 02989600  | -3. 95158500 |
| C | 1. 34596600  | 4. 73606100  | -2. 27069700 |
| C | -0. 78907500 | 3. 08788700  | -4. 82151300 |
| H | -0. 53465000 | 1. 07668700  | -5. 61011200 |
| H | -0. 80963500 | 4. 99038500  | -3. 84100800 |
| H | 0. 81800900  | 5. 68030100  | -2. 15867500 |
| H | -1. 67753400 | 3. 28911000  | -5. 41469800 |
| C | 1. 34472900  | -3. 58911400 | 2. 27660200  |
| C | 0. 56612300  | -2. 93833200 | 3. 26372700  |
| C | 0. 84283800  | -4. 73999100 | 1. 62060400  |
| C | 0. 99820600  | -1. 74528200 | 3. 92949900  |
| C | -0. 72357700 | -3. 47927900 | 3. 62889700  |
| C | -0. 46474400 | -5. 24751000 | 1. 96885000  |
| C | 0. 24322300  | -1. 15873500 | 4. 91296700  |
| H | 1. 93803600  | -1. 29308800 | 3. 63668200  |
| C | -1. 47405900 | -2. 84688700 | 4. 67069400  |
| C | -1. 20566200 | -4. 61251000 | 2. 96908500  |
| C | -1. 00461500 | -1. 72565900 | 5. 30288600  |
| H | 0. 59537200  | -0. 25055000 | 5. 39227400  |
| H | -2. 42577800 | -3. 28945700 | 4. 95845900  |
| H | -2. 17665500 | -5. 01834300 | 3. 24769500  |
| H | -1. 57792800 | -1. 26516600 | 6. 10369200  |
| C | 4. 86335100  | 4. 06831200  | -0. 04871800 |
| H | 5. 78029100  | 3. 91206300  | 0. 51357100  |
| C | 4. 41009400  | 3. 09059800  | -0. 89570000 |
| H | 4. 97613300  | 2. 17269200  | -1. 00311300 |
| C | 4. 14879400  | 5. 28987600  | 0. 10127900  |
| H | 4. 51927100  | 6. 05291400  | 0. 78065400  |
| C | 3. 00307100  | 5. 50080900  | -0. 61716700 |
| H | 2. 44957000  | 6. 42976400  | -0. 51576300 |
| C | 1. 08076000  | -6. 57555500 | 0. 02564900  |
| H | 1. 67031000  | -7. 09918700 | -0. 72205100 |
| C | -0. 21664200 | -7. 05807700 | 0. 35784700  |
| H | -0. 60617400 | -7. 94198400 | -0. 14016300 |
| C | -0. 96276300 | -6. 41167700 | 1. 30493600  |
| H | -1. 95204300 | -6. 77372600 | 1. 57542300  |
| C | 1. 59143300  | -5. 46072800 | 0. 63617500  |

|   |             |             |             |
|---|-------------|-------------|-------------|
| H | 2.58310400  | -5.11211200 | 0.37331600  |
| C | -5.56676800 | -0.43940600 | -0.57110600 |
| C | -5.92493400 | -0.20742300 | 0.92875900  |
| H | -6.32056100 | 0.80769000  | 1.02508100  |
| H | -6.74973600 | -0.88184600 | 1.19973300  |
| C | -4.87077900 | -0.39104700 | 1.98348300  |
| C | -4.43005600 | 0.54697100  | -0.97032300 |
| H | -4.82508200 | 1.55684700  | -0.86695500 |
| H | -4.16929300 | 0.39338700  | -2.02187700 |
| N | -3.16399800 | 0.49372700  | -0.21577900 |
| C | -2.60466800 | 1.55473900  | 0.42218600  |
| N | -1.27724900 | 1.50929200  | 0.64540900  |
| C | -0.50982100 | 2.46760500  | 1.37034000  |
| C | -0.57286100 | 3.83303400  | 1.07882900  |
| C | 0.37385100  | 1.99971900  | 2.34591200  |
| C | 0.20989700  | 4.72885200  | 1.80507000  |
| C | 1.16651900  | 2.90879500  | 3.04946900  |
| H | 0.45522100  | 0.93431500  | 2.52672800  |
| C | 1.08235000  | 4.27597300  | 2.79504000  |
| H | 1.70416100  | 4.97552100  | 3.33965400  |
| C | 2.08062000  | 2.39838800  | 4.13144100  |
| C | 0.07506500  | 6.20547900  | 1.54632400  |
| F | 1.39625800  | 2.14531200  | 5.27972000  |
| F | 3.04672700  | 3.28644200  | 4.44366500  |
| F | 2.68472600  | 1.24272800  | 3.78189500  |
| F | -0.21553800 | 6.46918400  | 0.24998800  |
| F | 1.20681100  | 6.87947300  | 1.85075700  |
| F | -0.91721600 | 6.75267700  | 2.28521100  |
| S | -3.59691100 | 2.83419200  | 1.04961000  |
| H | -1.21033500 | 4.19226600  | 0.28232200  |
| H | -0.72957600 | 0.66126600  | 0.40293500  |
| H | -2.48619400 | -0.14529500 | -0.65311500 |
| C | -4.75197700 | 0.65975300  | 2.91811400  |
| H | -5.68539500 | 1.22227900  | 3.04441100  |
| H | -4.25867200 | 1.52746000  | 2.14783400  |
| N | 0.93572200  | -1.12045300 | -2.00373900 |
| S | -0.52344400 | -1.68337300 | -2.20921700 |
| O | -1.55945800 | -0.60890000 | -2.27389300 |
| O | -0.90212900 | -2.86782300 | -1.42028300 |
| C | -0.41092000 | -2.31157900 | -3.96115000 |
| F | -0.05532800 | -1.35682000 | -4.82946500 |
| F | -1.62365600 | -2.77251100 | -4.31714900 |
| F | 0.46625400  | -3.31226800 | -4.03950800 |
| C | -5.30577800 | -1.92669000 | -0.88271400 |

|   |             |             |             |
|---|-------------|-------------|-------------|
| C | -6.20416500 | -2.90492400 | -0.41211700 |
| C | -4.25313300 | -2.35768400 | -1.69781500 |
| C | -6.04246300 | -4.25237600 | -0.72337800 |
| H | -7.05723300 | -2.62106000 | 0.19961500  |
| C | -4.08287000 | -3.71159800 | -2.00711000 |
| H | -3.53234600 | -1.65737000 | -2.10074900 |
| C | -4.97311600 | -4.66446100 | -1.52222500 |
| H | -6.75413800 | -4.98002800 | -0.34142200 |
| H | -3.23525500 | -4.00295800 | -2.61736900 |
| H | -4.83799700 | -5.71596000 | -1.75996500 |
| C | -6.81602500 | -0.04496400 | -1.46890900 |
| H | -7.55839200 | -0.84127500 | -1.34813800 |
| H | -6.46819700 | -0.12155600 | -2.50606300 |
| C | -4.05144000 | -1.63243200 | 2.07395100  |
| H | -3.17824000 | -1.51551700 | 2.71763300  |
| H | -4.68989900 | -2.40624900 | 2.53299800  |
| H | -3.75035700 | -2.02585100 | 1.10299900  |
| C | -7.50456800 | 1.29831600  | -1.25821300 |
| C | -7.09247300 | 2.38677400  | -1.93104800 |
| H | -6.24894700 | 2.26134300  | -2.61159800 |
| C | -8.72509900 | 1.27590100  | -0.36318600 |
| H | -9.50815200 | 0.64837500  | -0.81200600 |
| H | -8.51271100 | 0.84108700  | 0.62104900  |
| H | -9.15268700 | 2.26719500  | -0.19864800 |
| C | -3.90701600 | 0.58444900  | 4.17908100  |
| H | -3.83506500 | 1.57774400  | 4.63170700  |
| H | -4.35660300 | -0.08958600 | 4.91778500  |
| H | -2.88991200 | 0.23502200  | 3.98346300  |
| C | -7.64371300 | 3.78384400  | -1.89747200 |
| H | -8.47176600 | 3.90967700  | -1.19558700 |
| H | -6.85796100 | 4.49889000  | -1.62031100 |
| H | -8.00010700 | 4.08274700  | -2.89265700 |

TS-EF-6SR-5

l imaginary frequency

H = -5393.918232

G = -5394.125016

E(M06-2X-DCM) = -5394.842547

|   |            |             |             |
|---|------------|-------------|-------------|
| O | 2.27056100 | -2.41031100 | -0.18290200 |
| O | 2.80776100 | 0.08916900  | -0.57340000 |
| P | 1.55669700 | -0.96587400 | -0.48284900 |
| O | 0.64143200 | -0.51005000 | 0.61297300  |
| C | 4.98162500 | -2.88024400 | 2.97163900  |
| C | 5.40186400 | -2.39347400 | 1.73835800  |

|   |              |              |              |
|---|--------------|--------------|--------------|
| C | 4. 50291500  | -2. 28021800 | 0. 66734200  |
| C | 2. 70676400  | -3. 10652700 | 2. 09848300  |
| C | 3. 64790500  | -3. 25207000 | 3. 13230800  |
| C | 3. 68199000  | 0. 00977000  | -1. 65913800 |
| C | 4. 64433000  | -0. 99631900 | -1. 70341000 |
| C | 5. 33029000  | -1. 23032400 | -2. 90520500 |
| C | 5. 16425000  | -0. 37793500 | -3. 99206500 |
| C | 4. 33381200  | 0. 73699000  | -3. 85738100 |
| C | 3. 57439700  | 0. 95595800  | -2. 69713900 |
| H | 3. 30979600  | -3. 65492400 | 4. 08261600  |
| H | 4. 25290300  | 1. 45379200  | -4. 66956300 |
| C | 5. 24125500  | -1. 86672800 | -0. 60103000 |
| C | 6. 48075600  | -1. 13908600 | 0. 03118700  |
| H | 6. 19409400  | -0. 10966600 | 0. 27561300  |
| H | 7. 33235600  | -1. 09370500 | -0. 65439300 |
| H | 7. 26442900  | -2. 20804400 | -2. 75430300 |
| H | 6. 06579800  | -3. 15050400 | -3. 63248800 |
| C | 3. 15769900  | -2. 58445700 | 0. 87100500  |
| H | 5. 67882900  | -2. 97315600 | 3. 80053300  |
| H | 5. 69443400  | -0. 55406400 | -4. 92472600 |
| C | 6. 77652100  | -1. 91296000 | 1. 33171000  |
| H | 7. 25059000  | -1. 28943600 | 2. 09832300  |
| H | 7. 45427100  | -2. 75911800 | 1. 14893800  |
| C | 6. 19697900  | -2. 46759900 | -2. 78513200 |
| C | 5. 72747500  | -3. 08772300 | -1. 44727800 |
| H | 4. 87660500  | -3. 75528600 | -1. 62417100 |
| H | 6. 50770000  | -3. 66453400 | -0. 94002800 |
| C | 2. 78562100  | 2. 22069000  | -2. 54519700 |
| C | 1. 63567800  | 2. 46845800  | -3. 33071100 |
| C | 3. 27057900  | 3. 21938600  | -1. 66097800 |
| C | 1. 09630300  | 1. 49913800  | -4. 23481200 |
| C | 0. 95458400  | 3. 74008100  | -3. 22287100 |
| C | 2. 57076700  | 4. 47937100  | -1. 55272600 |
| C | -0. 01308000 | 1. 77232700  | -4. 99137300 |
| H | 1. 56413900  | 0. 52494700  | -4. 29160000 |
| C | -0. 19711900 | 3. 98568700  | -4. 03462100 |
| C | 1. 43252600  | 4. 70430900  | -2. 33252600 |
| C | -0. 66547700 | 3. 03457400  | -4. 89986300 |
| H | -0. 41113700 | 1. 01031600  | -5. 65416700 |
| H | -0. 69047500 | 4. 95127500  | -3. 94760300 |
| H | 0. 90973200  | 5. 65391600  | -2. 24475800 |
| H | -1. 54085000 | 3. 23354800  | -5. 51291100 |
| C | 1. 29824400  | -3. 54855500 | 2. 34218900  |
| C | 0. 50949800  | -2. 87543400 | 3. 30607400  |



|   |             |             |             |
|---|-------------|-------------|-------------|
| C | 0.79715100  | -4.70572300 | 1.69680400  |
| C | 0.94078100  | -1.67514800 | 3.95928000  |
| C | -0.79042300 | -3.39972700 | 3.65903100  |
| C | -0.52002000 | -5.19685700 | 2.03215900  |
| C | 0.17473600  | -1.06600000 | 4.92020200  |
| H | 1.88912600  | -1.23568600 | 3.67464500  |
| C | -1.55240800 | -2.74392000 | 4.67774400  |
| C | -1.27141000 | -4.53964100 | 3.00998700  |
| C | -1.08419000 | -1.61592600 | 5.29868700  |
| H | 0.52662900  | -0.15285700 | 5.39018100  |
| H | -2.51240400 | -3.17383500 | 4.95705000  |
| H | -2.25010900 | -4.93295600 | 3.27944600  |
| H | -1.66673500 | -1.13732300 | 6.08203100  |
| C | 4.90100200  | 4.04368000  | -0.03292500 |
| H | 5.80572800  | 3.88908800  | 0.54925100  |
| C | 4.45689700  | 3.05698100  | -0.87431500 |
| H | 5.01812700  | 2.13362500  | -0.95745000 |
| C | 4.19282000  | 5.27240800  | 0.08548100  |
| H | 4.55591000  | 6.04265200  | 0.76070900  |
| C | 3.06279000  | 5.48102500  | -0.65807100 |
| H | 2.51434400  | 6.41530500  | -0.58092100 |
| C | 1.04494400  | -6.56866600 | 0.13550200  |
| H | 1.64185100  | -7.10908600 | -0.59419900 |
| C | -0.26158500 | -7.03515000 | 0.45456200  |
| H | -0.65060200 | -7.92374100 | -0.03544700 |
| C | -1.01721900 | -6.36748000 | 1.37907900  |
| H | -2.01373600 | -6.71695200 | 1.63933200  |
| C | 1.55521500  | -5.44832200 | 0.73616400  |
| H | 2.55379700  | -5.11202900 | 0.48362100  |
| C | -5.55628200 | -0.43440100 | -0.64122500 |
| C | -5.95225600 | -0.19752300 | 0.84940100  |
| H | -6.40639700 | 0.79501300  | 0.92390200  |
| H | -6.75083700 | -0.90760000 | 1.10763500  |
| C | -4.91374900 | -0.33305600 | 1.92344000  |
| C | -4.41423500 | 0.54640800  | -1.03574400 |
| H | -4.79642300 | 1.55870500  | -0.92912600 |
| H | -4.15265300 | 0.39427300  | -2.08738300 |
| N | -3.15071500 | 0.49514400  | -0.27656600 |
| C | -2.59568800 | 1.56458000  | 0.35117200  |
| N | -1.27210200 | 1.51959600  | 0.59323500  |
| C | -0.51094800 | 2.48970000  | 1.30955100  |
| C | -0.56479100 | 3.84935300  | 0.99077300  |
| C | 0.35755500  | 2.03766700  | 2.30602400  |
| C | 0.21080800  | 4.75643400  | 1.71086400  |

|   |              |              |              |
|---|--------------|--------------|--------------|
| C | 1. 14398200  | 2. 95735000  | 3. 00262800  |
| H | 0. 43230100  | 0. 97573100  | 2. 50863300  |
| C | 1. 06806100  | 4. 31971800  | 2. 72104800  |
| H | 1. 68485300  | 5. 02753600  | 3. 26060900  |
| C | 2. 04184800  | 2. 46477200  | 4. 10628600  |
| C | 0. 08354100  | 6. 22825700  | 1. 42240700  |
| F | 1. 34151000  | 2. 23666000  | 5. 25013200  |
| F | 3. 00719400  | 3. 35525500  | 4. 41383500  |
| F | 2. 64592500  | 1. 30036600  | 3. 78719300  |
| F | -0. 17752300 | 6. 46846400  | 0. 11529200  |
| F | 1. 20870900  | 6. 90704500  | 1. 74004200  |
| F | -0. 92480600 | 6. 78918100  | 2. 12851800  |
| S | -3. 59014000 | 2. 86294800  | 0. 93922100  |
| H | -1. 18962500 | 4. 19554600  | 0. 17856700  |
| H | -0. 72350800 | 0. 66565700  | 0. 37377100  |
| H | -2. 47040900 | -0. 14978200 | -0. 70156000 |
| C | -4. 81319000 | 0. 74503500  | 2. 82714000  |
| H | -5. 74743000 | 1. 31253300  | 2. 91767000  |
| H | -4. 29885900 | 1. 58665800  | 2. 03805100  |
| N | 0. 97706100  | -1. 14702700 | -1. 98332200 |
| S | -0. 48134600 | -1. 70615100 | -2. 20449700 |
| O | -1. 51208400 | -0. 62821300 | -2. 29492500 |
| O | -0. 87624100 | -2. 88115500 | -1. 40960000 |
| C | -0. 34512300 | -2. 35269300 | -3. 94816900 |
| F | 0. 03017000  | -1. 40940400 | -4. 82057900 |
| F | -1. 55490000 | -2. 80986000 | -4. 31887300 |
| F | 0. 52683500  | -3. 35953000 | -4. 00203800 |
| C | -5. 29035600 | -1. 92410100 | -0. 94068700 |
| C | -6. 19474300 | -2. 90280200 | -0. 48281200 |
| C | -4. 22472200 | -2. 35649600 | -1. 73872300 |
| C | -6. 02804400 | -4. 25051400 | -0. 79091600 |
| H | -7. 05681500 | -2. 62108400 | 0. 11676400  |
| C | -4. 04875300 | -3. 71049800 | -2. 04342100 |
| H | -3. 49785200 | -1. 65726400 | -2. 13253600 |
| C | -4. 94649200 | -4. 66326900 | -1. 57222400 |
| H | -6. 74557700 | -4. 97769500 | -0. 41920900 |
| H | -3. 19123900 | -4. 00230500 | -2. 63933400 |
| H | -4. 80724400 | -5. 71495100 | -1. 80673400 |
| C | -6. 81175200 | -0. 05684600 | -1. 53681300 |
| H | -7. 59338800 | -0. 78072400 | -1. 28666000 |
| H | -6. 52298900 | -0. 27482700 | -2. 57325600 |
| C | -4. 08455300 | -1. 56432000 | 2. 05811600  |
| H | -3. 20327100 | -1. 41498200 | 2. 68401600  |
| H | -4. 71124300 | -2. 31929900 | 2. 56269000  |

|   |              |             |             |
|---|--------------|-------------|-------------|
| H | -3.79447500  | -1.99809200 | 1.10114300  |
| C | -7.40514800  | 1.34267200  | -1.46163200 |
| C | -8.49835100  | 1.55479200  | -0.70787500 |
| H | -8.91075200  | 0.70354300  | -0.16281500 |
| C | -6.78186900  | 2.43406500  | -2.31534100 |
| H | -6.11320400  | 3.08931000  | -1.74197300 |
| H | -6.19101000  | 2.00640000  | -3.13191900 |
| H | -7.54463100  | 3.07576200  | -2.76764600 |
| C | -3.98935600  | 0.71041500  | 4.10383700  |
| H | -3.91825100  | 1.71865900  | 4.52222900  |
| H | -4.45630700  | 0.06590500  | 4.85803900  |
| H | -2.97152400  | 0.34756200  | 3.93838700  |
| C | -9.25192600  | 2.84140900  | -0.52319800 |
| H | -10.30162300 | 2.72748800  | -0.82649300 |
| H | -9.26596300  | 3.13669400  | 0.53500300  |
| H | -8.82365900  | 3.67194400  | -1.08985600 |

TS-EF-6SR-6

1 imaginary frequency

H = -5393.922704

G = -5394.131588

E(M06-2X-DCM) = -5394.853269

|   |             |             |             |
|---|-------------|-------------|-------------|
| O | -1.21250300 | -2.17140900 | -1.42522600 |
| O | -2.89222500 | -0.60037900 | -0.21593000 |
| P | -1.29657500 | -0.94428100 | -0.33779300 |
| O | -0.61820000 | 0.29508300  | -0.83261000 |
| C | -2.34014000 | -1.20857800 | -5.34083400 |
| C | -3.29422500 | -1.54876900 | -4.38676100 |
| C | -2.90178000 | -1.95667900 | -3.10365800 |
| C | -0.56122500 | -1.59171100 | -3.69769500 |
| C | -0.98861100 | -1.26997600 | -4.99856200 |
| C | -3.80549400 | -1.59056600 | 0.14602800  |
| C | -4.25515000 | -2.49262400 | -0.82071700 |
| C | -5.06347000 | -3.57092800 | -0.42579000 |
| C | -5.50291400 | -3.68970000 | 0.88764800  |
| C | -5.13628200 | -2.71370500 | 1.81202300  |
| C | -4.27922700 | -1.65326900 | 1.47244300  |
| H | -0.23387500 | -1.04060600 | -5.74505300 |
| H | -5.50144300 | -2.77164900 | 2.83313700  |
| C | -4.10623700 | -2.49813600 | -2.34207600 |
| C | -5.25282100 | -1.68486500 | -3.03227900 |
| H | -5.30500000 | -0.69208200 | -2.57034900 |
| H | -6.23179000 | -2.16070700 | -2.91762900 |
| H | -6.35800100 | -4.38300100 | -1.96386700 |

|   |             |             |             |
|---|-------------|-------------|-------------|
| H | -5.20955700 | -5.55345900 | -1.32300000 |
| C | -1.55595500 | -1.90345800 | -2.74852900 |
| H | -2.63563700 | -0.91160800 | -6.34421600 |
| H | -6.13132900 | -4.52303800 | 1.19156700  |
| C | -4.80343000 | -1.55041800 | -4.50462500 |
| H | -5.18854800 | -0.64233800 | -4.98297800 |
| H | -5.15582200 | -2.39698300 | -5.11041900 |
| C | -5.33029900 | -4.49762300 | -1.59099500 |
| C | -4.29687400 | -4.02548400 | -2.63362200 |
| H | -3.34166900 | -4.53539100 | -2.46397600 |
| H | -4.59939900 | -4.21885700 | -3.66745700 |
| C | -3.98042200 | -0.63046100 | 2.52646200  |
| C | -3.24537300 | -0.99692500 | 3.68044900  |
| C | -4.56211400 | 0.65963700  | 2.43520900  |
| C | -2.60608300 | -2.27058200 | 3.81650700  |
| C | -3.11109600 | -0.05918400 | 4.77345200  |
| C | -4.39990300 | 1.59650200  | 3.52540300  |
| C | -1.91024400 | -2.60067900 | 4.94895700  |
| H | -2.64310700 | -2.96374200 | 2.98661900  |
| C | -2.38977500 | -0.45019400 | 5.94530900  |
| C | -3.68784500 | 1.20988100  | 4.66520400  |
| C | -1.80939700 | -1.68592600 | 6.03510300  |
| H | -1.40818600 | -3.56145400 | 5.00898800  |
| H | -2.31005900 | 0.26297200  | 6.76283000  |
| H | -3.59495000 | 1.90826100  | 5.49542300  |
| H | -1.25698800 | -1.96917600 | 6.92697500  |
| C | 0.90337800  | -1.61113400 | -3.39090700 |
| C | 1.67083200  | -0.42738000 | -3.53430000 |
| C | 1.54149400  | -2.82766400 | -3.03982400 |
| C | 1.09585800  | 0.84140300  | -3.87279800 |
| C | 3.10190500  | -0.47125000 | -3.33220600 |
| C | 2.96655000  | -2.84506700 | -2.79816900 |
| C | 1.87032300  | 1.96070100  | -4.04352900 |
| H | 0.02157700  | 0.90624100  | -3.99540900 |
| C | 3.87673100  | 0.71690300  | -3.52824500 |
| C | 3.70834100  | -1.67135900 | -2.95395800 |
| C | 3.28431000  | 1.90057400  | -3.87907200 |
| H | 1.40261200  | 2.90407200  | -4.31490100 |
| H | 4.95398800  | 0.65121600  | -3.39417700 |
| H | 4.78207700  | -1.68964400 | -2.77854500 |
| H | 3.88494400  | 2.79294800  | -4.03346800 |
| C | -5.92329300 | 2.32453100  | 1.26984500  |
| H | -6.52235200 | 2.60942300  | 0.40962300  |
| C | -5.35380900 | 1.07885400  | 1.31796300  |

|   |             |             |             |
|---|-------------|-------------|-------------|
| H | -5.50866100 | 0.38735100  | 0.49806500  |
| C | -5.74203500 | 3.25004200  | 2.33660300  |
| H | -6.20563100 | 4.23191100  | 2.28447600  |
| C | -5.00107600 | 2.89130200  | 3.43079300  |
| H | -4.86980400 | 3.58041300  | 4.26244200  |
| C | 1.48682600  | -5.22934200 | -2.59061200 |
| H | 0.92666500  | -6.15769900 | -2.51803100 |
| C | 2.88462100  | -5.23292800 | -2.32271600 |
| H | 3.37731700  | -6.15942400 | -2.04086600 |
| C | 3.60051300  | -4.07210500 | -2.42942600 |
| H | 4.67097800  | -4.05957900 | -2.23926300 |
| C | 0.84154700  | -4.07184500 | -2.93827000 |
| H | -0.22169000 | -4.09452800 | -3.14609900 |
| C | -0.94492700 | 4.18672700  | -0.10595700 |
| C | -1.30871800 | 3.46619200  | 1.25274800  |
| H | -2.07916800 | 4.07078000  | 1.75496900  |
| H | -1.79592400 | 2.52241400  | 0.99812700  |
| C | -0.24954300 | 3.16061200  | 2.29164700  |
| C | 0.48965200  | 3.79698000  | -0.55808800 |
| H | 1.20199500  | 4.50932200  | -0.14912000 |
| H | 0.57398100  | 3.88174600  | -1.64567000 |
| N | 0.93652700  | 2.46012800  | -0.15805000 |
| C | 2.15999400  | 2.17701200  | 0.31848000  |
| N | 2.55473400  | 0.89281800  | 0.32793700  |
| C | 3.85088500  | 0.43816000  | 0.72985100  |
| C | 4.94828200  | 0.73082900  | -0.07657400 |
| C | 3.99677200  | -0.36231800 | 1.86415500  |
| C | 6.20383900  | 0.21834500  | 0.25015700  |
| C | 5.26236300  | -0.85477700 | 2.18803500  |
| H | 3.13207000  | -0.60929900 | 2.47117500  |
| C | 6.36922000  | -0.57260700 | 1.38529400  |
| H | 7.34520000  | -0.96573700 | 1.64153800  |
| C | 5.41872200  | -1.75129500 | 3.39063300  |
| C | 7.34792300  | 0.49186100  | -0.68691800 |
| F | 5.10759700  | -3.03226700 | 3.10052900  |
| F | 4.61804900  | -1.36589400 | 4.40532700  |
| F | 6.69124600  | -1.74737200 | 3.85172700  |
| F | 7.13289600  | -0.08712100 | -1.90014200 |
| F | 8.52081000  | 0.01872500  | -0.22355600 |
| F | 7.50077000  | 1.81362100  | -0.91962500 |
| S | 3.15021400  | 3.41390800  | 1.04826800  |
| H | 4.81069800  | 1.33213100  | -0.96810600 |
| H | 1.91621100  | 0.14679400  | 0.02415400  |
| H | 0.36377300  | 1.65619300  | -0.47568500 |

|   |             |             |             |
|---|-------------|-------------|-------------|
| C | 0.69049600  | 4.09217200  | 2.74422500  |
| H | 0.50716100  | 5.12351200  | 2.44155800  |
| H | 1.73170900  | 3.82342500  | 1.93223400  |
| N | -0.89432200 | -1.59065000 | 1.08613500  |
| S | 0.58415700  | -2.04443000 | 1.43969800  |
| O | 0.96221900  | -1.65113900 | 2.80628300  |
| O | 1.57831000  | -1.77958500 | 0.36729600  |
| C | 0.46510800  | -3.90917600 | 1.49868400  |
| F | 0.04590700  | -4.38836300 | 0.32519500  |
| F | -0.39780200 | -4.29324400 | 2.45269700  |
| F | 1.66672100  | -4.42254400 | 1.77874400  |
| C | -2.04340800 | 3.77036900  | -1.11133200 |
| C | -3.36767200 | 4.19565400  | -0.90711200 |
| C | -1.79445800 | 2.94849500  | -2.21859100 |
| C | -4.38761900 | 3.85210600  | -1.79229000 |
| H | -3.62014000 | 4.80125800  | -0.04159300 |
| C | -2.81495500 | 2.59588500  | -3.10535700 |
| H | -0.80597100 | 2.54582800  | -2.40022500 |
| C | -4.11457800 | 3.05523300  | -2.90465900 |
| H | -5.39764800 | 4.20924100  | -1.60937100 |
| H | -2.58767400 | 1.94829700  | -3.94792700 |
| H | -4.90728500 | 2.78828200  | -3.59845200 |
| C | -0.95480900 | 5.75082300  | 0.07676600  |
| H | -1.98036000 | 6.05689700  | 0.31624300  |
| H | -0.35480000 | 5.99000100  | 0.95923100  |
| C | -0.43714100 | 6.59743800  | -1.07770900 |
| C | 0.74008400  | 7.23303700  | -0.94006900 |
| H | 1.27588100  | 7.09563500  | 0.00110200  |
| C | -0.31486100 | 1.78771100  | 2.87935300  |
| H | 0.59359600  | 1.48923600  | 3.40535300  |
| H | -1.13736600 | 1.76315400  | 3.61255900  |
| H | -0.56051900 | 1.02732500  | 2.13416500  |
| C | -1.31907700 | 6.71618600  | -2.29937500 |
| H | -0.96817000 | 7.48497000  | -2.99144800 |
| H | -1.38315900 | 5.77120700  | -2.85065100 |
| H | -2.34696600 | 6.96872100  | -2.00993400 |
| C | 1.39143400  | 3.98188000  | 4.09724800  |
| H | 2.21521600  | 4.70066700  | 4.14589500  |
| H | 0.69656100  | 4.20996000  | 4.91402300  |
| H | 1.81079000  | 2.98889000  | 4.27517300  |
| C | 1.44781300  | 8.13010200  | -1.91596600 |
| H | 2.43502000  | 7.72025800  | -2.16931500 |
| H | 0.90028300  | 8.27462700  | -2.85046400 |
| H | 1.62720900  | 9.11975100  | -1.47426300 |

TS-EF-6SR-7

l imaginary frequency

H = -5393.921697

G = -5394.130867

E(M06-2X-DCM) = -5394.854467

|   |             |             |             |
|---|-------------|-------------|-------------|
| O | -0.64590800 | -2.63549400 | -0.61742200 |
| O | -2.75330400 | -1.16119400 | -0.26629500 |
| P | -1.11939600 | -1.14973600 | -0.11008400 |
| O | -0.59755400 | -0.04670800 | -0.97511200 |
| C | -1.36042800 | -3.53759300 | -4.64168800 |
| C | -2.34759400 | -3.73193400 | -3.68085200 |
| C | -2.07442600 | -3.50219600 | -2.32511900 |
| C | 0.19118400  | -2.79633900 | -2.89607800 |
| C | -0.09730800 | -3.10497400 | -4.23733200 |
| C | -3.51391100 | -2.11732600 | 0.40958800  |
| C | -3.61263100 | -3.41202100 | -0.10402800 |
| C | -4.23828000 | -4.40580400 | 0.66712500  |
| C | -4.85381000 | -4.09229600 | 1.87342500  |
| C | -4.85764400 | -2.76637900 | 2.30395800  |
| C | -4.18895900 | -1.75626800 | 1.59396300  |
| H | 0.69017900  | -2.97791300 | -4.97435800 |
| H | -5.37400600 | -2.49557100 | 3.22031100  |
| C | -3.23427900 | -3.99068200 | -1.46730500 |
| C | -4.41157800 | -3.84456100 | -2.49101100 |
| H | -4.75401500 | -2.80306700 | -2.48476300 |
| H | -5.26723200 | -4.47885000 | -2.23905700 |
| H | -5.07271900 | -6.07325500 | -0.44025000 |
| H | -3.81933000 | -6.54567800 | 0.70206900  |
| C | -0.84044900 | -2.97546800 | -1.95436800 |
| H | -1.56149900 | -3.72518900 | -5.69353500 |
| H | -5.33879100 | -4.86243100 | 2.46788600  |
| C | -3.78280700 | -4.17661900 | -3.86280500 |
| H | -4.28133500 | -3.66139600 | -4.69200200 |
| H | -3.84270700 | -5.25231900 | -4.08032000 |
| C | -4.11599300 | -5.75824500 | -0.00016100 |
| C | -3.05334200 | -5.49886000 | -1.08808400 |
| H | -2.05105900 | -5.63553700 | -0.66633800 |
| H | -3.14489400 | -6.16115400 | -1.95462100 |
| C | -4.29625400 | -0.34625300 | 2.08819100  |
| C | -3.68196600 | 0.03799900  | 3.30434400  |
| C | -5.12647200 | 0.56833700  | 1.39219600  |
| C | -2.82783200 | -0.83816800 | 4.04765600  |
| C | -3.90312300 | 1.36755500  | 3.82964800  |

|   |             |             |             |
|---|-------------|-------------|-------------|
| C | -5.31314800 | 1.90501500  | 1.91178800  |
| C | -2.25313000 | -0.44143700 | 5.22578000  |
| H | -2.60609500 | -1.81707500 | 3.64361100  |
| C | -3.29563900 | 1.73654800  | 5.07161100  |
| C | -4.70024700 | 2.26602800  | 3.11535600  |
| C | -2.49670100 | 0.85844400  | 5.75344000  |
| H | -1.58426000 | -1.11724500 | 5.74972700  |
| H | -3.48714200 | 2.73375200  | 5.46230800  |
| H | -4.86225400 | 3.26605300  | 3.51396800  |
| H | -2.03705100 | 1.15139200  | 6.69361800  |
| C | 1.56352700  | -2.32870400 | -2.52910500 |
| C | 2.06588100  | -1.12066600 | -3.07564000 |
| C | 2.38867300  | -3.12946800 | -1.70004900 |
| C | 1.26661200  | -0.23221100 | -3.86756200 |
| C | 3.43743200  | -0.73719900 | -2.82363800 |
| C | 3.73521700  | -2.69733300 | -1.40115000 |
| C | 1.79644500  | 0.90813200  | -4.41601400 |
| H | 0.21882500  | -0.46355000 | -4.01685500 |
| C | 3.95473200  | 0.45546100  | -3.42328200 |
| C | 4.22925500  | -1.52928800 | -1.98774000 |
| C | 3.16266100  | 1.25382000  | -4.20491700 |
| H | 1.16465500  | 1.55700000  | -5.01741400 |
| H | 4.99410100  | 0.71644300  | -3.23726100 |
| H | 5.25450600  | -1.22698300 | -1.78511800 |
| H | 3.56881000  | 2.15367500  | -4.65964000 |
| C | -6.64359100 | 1.12268000  | -0.44643400 |
| H | -7.17952200 | 0.82517700  | -1.34383100 |
| C | -5.83938300 | 0.21893500  | 0.19913400  |
| H | -5.74659500 | -0.78998900 | -0.18684700 |
| C | -6.79372900 | 2.44875400  | 0.05053600  |
| H | -7.43248400 | 3.15268500  | -0.47593300 |
| C | -6.14773400 | 2.82251300  | 1.19829700  |
| H | -6.26908300 | 3.82568500  | 1.60095800  |
| C | 2.77093800  | -5.10800500 | -0.31796500 |
| H | 2.41345500  | -6.04731900 | 0.09528100  |
| C | 4.07696600  | -4.64945900 | 0.01405100  |
| H | 4.69791100  | -5.23200100 | 0.68897800  |
| C | 4.54515100  | -3.48024400 | -0.52000100 |
| H | 5.53749200  | -3.11480100 | -0.26890900 |
| C | 1.95917300  | -4.37662600 | -1.14435800 |
| H | 0.96875900  | -4.74499900 | -1.38418600 |
| C | -1.25821300 | 3.61456400  | -1.39817700 |
| C | -1.57935000 | 3.20413400  | 0.06728700  |
| H | -2.56905800 | 3.60867700  | 0.33581800  |



|   |             |             |             |
|---|-------------|-------------|-------------|
| H | -1.68255900 | 2.11915400  | 0.09071300  |
| C | -0.66546400 | 3.56560600  | 1.21606900  |
| C | 0.26649300  | 3.36799000  | -1.67923300 |
| H | 0.83814700  | 4.27910200  | -1.51369500 |
| H | 0.40566900  | 3.08267700  | -2.72525800 |
| N | 0.89102400  | 2.31045000  | -0.87300100 |
| C | 2.09780800  | 2.41075000  | -0.29907600 |
| N | 2.71291700  | 1.27431800  | 0.09327500  |
| C | 4.07787400  | 1.14073000  | 0.45950600  |
| C | 5.07846100  | 1.78750300  | -0.26961900 |
| C | 4.42544400  | 0.25619100  | 1.48750400  |
| C | 6.41996500  | 1.57068100  | 0.04560400  |
| C | 5.77125000  | 0.03597600  | 1.77560500  |
| H | 3.64760400  | -0.26930000 | 2.02727700  |
| C | 6.77829600  | 0.69657700  | 1.06890900  |
| H | 7.82117300  | 0.52106800  | 1.30276000  |
| C | 6.15562800  | -0.99372700 | 2.80649100  |
| C | 7.46700000  | 2.28746600  | -0.76450500 |
| F | 6.38908900  | -2.19842700 | 2.22859100  |
| F | 5.19455100  | -1.17440200 | 3.73037800  |
| F | 7.29144400  | -0.64848900 | 3.45441400  |
| F | 7.22373800  | 2.16367100  | -2.09413200 |
| F | 8.70674100  | 1.80993200  | -0.53517800 |
| F | 7.48818400  | 3.61165700  | -0.49873300 |
| S | 2.77536900  | 3.97698800  | 0.07550900  |
| H | 4.81872800  | 2.42333300  | -1.10689100 |
| H | 2.16920600  | 0.40209500  | 0.14189000  |
| H | 0.47430700  | 1.36668500  | -0.98060400 |
| C | 0.08329100  | 4.73924600  | 1.31457700  |
| H | -0.18215200 | 5.53362000  | 0.62009300  |
| H | 1.24333700  | 4.36640900  | 0.70451300  |
| N | -0.85345700 | -1.13596800 | 1.48623000  |
| S | 0.59126300  | -1.21261600 | 2.12747100  |
| O | 0.72844900  | -0.33316700 | 3.29561000  |
| O | 1.70169000  | -1.18453100 | 1.13383800  |
| C | 0.67174100  | -2.93947400 | 2.83966000  |
| F | 0.48031500  | -3.85732400 | 1.88980600  |
| F | -0.27432200 | -3.08984600 | 3.78088900  |
| F | 1.86853200  | -3.13412400 | 3.40280900  |
| C | -2.09573300 | 2.77594200  | -2.40250500 |
| C | -3.09262700 | 1.86738000  | -2.02912600 |
| C | -1.86458900 | 2.94538500  | -3.78093800 |
| C | -3.81837400 | 1.15406100  | -2.98729600 |
| H | -3.32651300 | 1.68471600  | -0.98836400 |

|   |             |            |             |
|---|-------------|------------|-------------|
| C | -2.58502000 | 2.23672600 | -4.73995300 |
| H | -1.11038500 | 3.64812700 | -4.12635700 |
| C | -3.57096700 | 1.33112400 | -4.34538100 |
| H | -4.57762400 | 0.45507800 | -2.65123400 |
| H | -2.37544300 | 2.39618400 | -5.79461800 |
| H | -4.13489600 | 0.77290300 | -5.08780900 |
| C | -1.53897000 | 5.14272300 | -1.67772300 |
| H | -0.76821600 | 5.73883800 | -1.18109100 |
| H | -1.38866100 | 5.31015000 | -2.75195500 |
| C | -2.89894500 | 5.69985800 | -1.28267800 |
| C | -2.97375800 | 6.57142600 | -0.26102400 |
| H | -2.04521600 | 6.83011800 | 0.25046300  |
| C | -0.61440100 | 2.57276700 | 2.33846300  |
| H | 0.41623300  | 2.36132100 | 2.64820000  |
| H | -1.11545800 | 2.98375900 | 3.22650500  |
| H | -1.08785100 | 1.62193900 | 2.09506900  |
| C | -4.09429200 | 5.28768300 | -2.11327700 |
| H | -4.93309900 | 5.97824000 | -1.99525700 |
| H | -3.83315300 | 5.25475000 | -3.17720800 |
| H | -4.44969300 | 4.28438900 | -1.85289900 |
| C | 0.63539800  | 5.24206900 | 2.64442400  |
| H | 1.34582400  | 6.05659400 | 2.47245100  |
| H | -0.17110400 | 5.62832100 | 3.27976200  |
| H | 1.15661600  | 4.45854900 | 3.20051600  |
| C | -4.18519400 | 7.26990700 | 0.29012300  |
| H | -4.05738100 | 8.36034200 | 0.25276900  |
| H | -5.10742800 | 7.02100700 | -0.24020000 |
| H | -4.33282900 | 7.01183300 | 1.34799200  |

TS-EF-6SR-8

l imaginary frequency

H = -5393.919775

G = -5394.129273

E(M06-2X-DCM) = -5394.851676

|   |             |             |             |
|---|-------------|-------------|-------------|
| O | -1.06570900 | -2.00673000 | -1.60750200 |
| O | -2.86164400 | -0.76329800 | -0.19782400 |
| P | -1.24202100 | -0.93598100 | -0.37737200 |
| O | -0.69581100 | 0.41621100  | -0.70897900 |
| C | -2.33880100 | -0.65497400 | -5.35790800 |
| C | -3.24122100 | -1.20895300 | -4.45576700 |
| C | -2.79243400 | -1.74030600 | -3.23854400 |
| C | -0.50633100 | -1.08220100 | -3.78748700 |
| C | -0.98270000 | -0.63054200 | -5.03122000 |
| C | -3.67400900 | -1.87230600 | 0.03422600  |

|   |             |             |             |
|---|-------------|-------------|-------------|
| C | -4.05034300 | -2.68597900 | -1.03659700 |
| C | -4.74673200 | -3.87765400 | -0.77595200 |
| C | -5.15336200 | -4.20041300 | 0.51368400  |
| C | -4.87134200 | -3.31400000 | 1.55163500  |
| C | -4.12615400 | -2.14208500 | 1.34236300  |
| H | -0.26483600 | -0.23186100 | -5.74199400 |
| H | -5.21716200 | -3.53076100 | 2.55814300  |
| C | -3.92688200 | -2.48729000 | -2.54744300 |
| C | -5.15671100 | -1.70732900 | -3.12378800 |
| H | -5.29626800 | -0.79228300 | -2.53641900 |
| H | -6.08393300 | -2.28650300 | -3.06913200 |
| H | -5.98336400 | -4.61349500 | -2.39739700 |
| H | -4.71757200 | -5.73779900 | -1.91442100 |
| C | -1.45263800 | -1.60589100 | -2.88490100 |
| H | -2.67733700 | -0.25376100 | -6.31004600 |
| H | -5.69392100 | -5.12231400 | 0.71269900  |
| C | -4.74512800 | -1.33982900 | -4.56741600 |
| H | -5.22151300 | -0.41765100 | -4.92013700 |
| H | -5.02670600 | -2.12983900 | -5.27775900 |
| C | -4.94310100 | -4.67351700 | -2.04726800 |
| C | -3.97760600 | -3.97732600 | -3.02784500 |
| H | -2.97559700 | -4.41036900 | -2.92958700 |
| H | -4.27902600 | -4.06789800 | -4.07602200 |
| C | -3.91764900 | -1.21762600 | 2.50306300  |
| C | -3.10487400 | -1.61182300 | 3.59317600  |
| C | -4.64526800 | -0.00227000 | 2.56307800  |
| C | -2.33555500 | -2.81881100 | 3.58462200  |
| C | -3.02474500 | -0.77214500 | 4.76833300  |
| C | -4.53256400 | 0.84333500  | 3.73081800  |
| C | -1.56553500 | -3.17941700 | 4.65809400  |
| H | -2.33744400 | -3.43168600 | 2.69310700  |
| C | -2.22016200 | -1.19337900 | 5.87376200  |
| C | -3.73125200 | 0.43415800  | 4.80134600  |
| C | -1.51393600 | -2.36432500 | 5.82421600  |
| H | -0.96756800 | -4.08420200 | 4.60934800  |
| H | -2.18126400 | -0.55667600 | 6.75489900  |
| H | -3.67266700 | 1.06023000  | 5.69023400  |
| H | -0.90033900 | -2.67073400 | 6.66708100  |
| C | 0.96113600  | -1.02246800 | -3.50013800 |
| C | 1.62873100  | 0.22829700  | -3.48504600 |
| C | 1.70220600  | -2.22112200 | -3.34179100 |
| C | 0.94158900  | 1.48115600  | -3.60488500 |
| C | 3.06714600  | 0.27078300  | -3.33887100 |
| C | 3.13269000  | -2.15758700 | -3.14353300 |

|   |              |              |              |
|---|--------------|--------------|--------------|
| C | 1. 62596400  | 2. 66953200  | -3. 64451700 |
| H | -0. 14104000 | 1. 48226000  | -3. 65057100 |
| C | 3. 74246100  | 1. 53218000  | -3. 38975200 |
| C | 3. 77732400  | -0. 91811500 | -3. 15589400 |
| C | 3. 04712300  | 2. 70102400  | -3. 54852400 |
| H | 1. 07801500  | 3. 60218200  | -3. 75493700 |
| H | 4. 82682700  | 1. 53503700  | -3. 30379900 |
| H | 4. 85632200  | -0. 87487800 | -3. 02117300 |
| H | 3. 57183800  | 3. 65156000  | -3. 59723100 |
| C | -6. 24560200 | 1. 59221200  | 1. 62163100  |
| H | -6. 92930500 | 1. 87812300  | 0. 82654000  |
| C | -5. 54009000 | 0. 41981800  | 1. 52684300  |
| H | -5. 66759800 | -0. 21559600 | 0. 65784300  |
| C | -6. 10236800 | 2. 43816200  | 2. 75868800  |
| H | -6. 66638800 | 3. 36530400  | 2. 81560100  |
| C | -5. 27060600 | 2. 06823800  | 3. 78145000  |
| H | -5. 16873000 | 2. 69298800  | 4. 66625300  |
| C | 1. 84622800  | -4. 65859500 | -3. 22932700 |
| H | 1. 36071500  | -5. 62993300 | -3. 27077800 |
| C | 3. 24951500  | -4. 58694200 | -3. 00285600 |
| H | 3. 82114500  | -5. 50080000 | -2. 86593100 |
| C | 3. 87117100  | -3. 36890100 | -2. 96733700 |
| H | 4. 94422400  | -3. 29688300 | -2. 80708700 |
| C | 1. 10298100  | -3. 51981800 | -3. 39630300 |
| H | 0. 03753300  | -3. 59923600 | -3. 57659500 |
| C | -1. 14709100 | 3. 96057300  | 0. 37243400  |
| C | -1. 39351500 | 3. 02635000  | 1. 61138400  |
| H | -2. 26872700 | 3. 40286800  | 2. 16433900  |
| H | -1. 68025500 | 2. 04438300  | 1. 23148700  |
| C | -0. 32321300 | 2. 79385400  | 2. 65745000  |
| C | 0. 34365800  | 3. 83084200  | -0. 05326200 |
| H | 0. 95852700  | 4. 53126000  | 0. 50631300  |
| H | 0. 47091000  | 4. 07821300  | -1. 10896300 |
| N | 0. 90150500  | 2. 49085500  | 0. 15231800  |
| C | 2. 14339300  | 2. 23481800  | 0. 59017200  |
| N | 2. 62089600  | 0. 98748300  | 0. 44203200  |
| C | 3. 95129300  | 0. 57430500  | 0. 76262300  |
| C | 5. 01162300  | 1. 05612200  | -0. 00170300 |
| C | 4. 17146100  | -0. 37272100 | 1. 76490700  |
| C | 6. 30435800  | 0. 58895000  | 0. 23486000  |
| C | 5. 47287500  | -0. 81971700 | 2. 00064900  |
| H | 3. 33634100  | -0. 76188600 | 2. 33812500  |
| C | 6. 54345400  | -0. 34688900 | 1. 23896900  |
| H | 7. 54799700  | -0. 70628300 | 1. 42477300  |

|   |              |              |              |
|---|--------------|--------------|--------------|
| C | 5. 71367100  | -1. 87197200 | 3. 05377400  |
| C | 7. 41008900  | 1. 08342800  | -0. 65688700 |
| F | 5. 51545000  | -3. 11625500 | 2. 56855500  |
| F | 4. 88818900  | -1. 71867500 | 4. 10903900  |
| F | 6. 98365600  | -1. 82710200 | 3. 51961400  |
| F | 7. 16835600  | 0. 75815900  | -1. 95581900 |
| F | 8. 60894400  | 0. 56233000  | -0. 33157800 |
| F | 7. 52342900  | 2. 42888700  | -0. 61703100 |
| S | 3. 05212700  | 3. 43860900  | 1. 46614100  |
| H | 4. 81694600  | 1. 76867100  | -0. 79526300 |
| H | 2. 02183200  | 0. 23671900  | 0. 07354200  |
| H | 0. 37185000  | 1. 70836500  | -0. 27512700 |
| C | 0. 52220100  | 3. 78611700  | 3. 16886900  |
| H | 0. 25265200  | 4. 80857700  | 2. 90350200  |
| H | 1. 59190300  | 3. 64814700  | 2. 38065100  |
| N | -0. 75105900 | -1. 71799500 | 0. 95032800  |
| S | 0. 76011900  | -2. 12602100 | 1. 20041900  |
| O | 1. 16446400  | -1. 88646100 | 2. 59489900  |
| O | 1. 70260100  | -1. 67067600 | 0. 14394500  |
| C | 0. 75218900  | -3. 98755800 | 1. 02422200  |
| F | 0. 33027500  | -4. 34298900 | -0. 19120000 |
| F | -0. 06076000 | -4. 53900600 | 1. 93995200  |
| F | 1. 98876000  | -4. 45682500 | 1. 21479100  |
| C | -2. 12050800 | 3. 56893000  | -0. 76647700 |
| C | -3. 35567700 | 2. 96038400  | -0. 49739100 |
| C | -1. 85402500 | 3. 90842700  | -2. 10329600 |
| C | -4. 26512100 | 2. 67462700  | -1. 51668400 |
| H | -3. 63439900 | 2. 68606700  | 0. 51322000  |
| C | -2. 75781000 | 3. 62127000  | -3. 12641700 |
| H | -0. 93651100 | 4. 42037500  | -2. 37051000 |
| C | -3. 97056300 | 2. 99651900  | -2. 83945400 |
| H | -5. 20417900 | 2. 19141500  | -1. 26276800 |
| H | -2. 51013600 | 3. 89386500  | -4. 14909800 |
| H | -4. 67547400 | 2. 76942800  | -3. 63472800 |
| C | -1. 48114800 | 5. 45270400  | 0. 77491900  |
| H | -2. 52654300 | 5. 44222400  | 1. 10203400  |
| H | -0. 88397700 | 5. 71337500  | 1. 65793100  |
| C | -1. 31030600 | 6. 55823700  | -0. 25449000 |
| C | -2. 39597600 | 7. 04332700  | -0. 87961300 |
| H | -3. 35558200 | 6. 58793700  | -0. 63267400 |
| C | -0. 27082700 | 1. 39741200  | 3. 18821600  |
| H | 0. 62903600  | 1. 17922400  | 3. 76485600  |
| H | -1. 13358400 | 1. 24851900  | 3. 85756200  |
| H | -0. 38019300 | 0. 64766900  | 2. 40012800  |

|   |             |            |             |
|---|-------------|------------|-------------|
| C | 0.08912800  | 7.09360300 | -0.46670100 |
| H | 0.09258500  | 8.05376200 | -0.98783200 |
| H | 0.60187700  | 7.23926400 | 0.49324700  |
| H | 0.71593300  | 6.40863500 | -1.05260300 |
| C | 1.19745400  | 3.68526600 | 4.53661600  |
| H | 1.94217500  | 4.48079300 | 4.63714000  |
| H | 0.46436100  | 3.80602600 | 5.34264800  |
| H | 1.71260000  | 2.73325900 | 4.68432200  |
| C | -2.47982900 | 8.12946800 | -1.91322900 |
| H | -3.18851400 | 8.90884700 | -1.60259700 |
| H | -1.52053300 | 8.61053600 | -2.12088800 |
| H | -2.85970200 | 7.72428000 | -2.86131000 |

TS-EF-6SR-9

l imaginary frequency

H = -5393.920775

G = -5394.129134

E(M06-2X-DCM) = -5394.852025

|   |             |             |             |
|---|-------------|-------------|-------------|
| O | -0.67003600 | -2.66695200 | -0.46477700 |
| O | -2.72770200 | -1.15195200 | 0.00586000  |
| P | -1.08731500 | -1.14689000 | -0.00911900 |
| O | -0.65484100 | -0.10541900 | -0.99134100 |
| C | -1.76025100 | -3.75877300 | -4.35562400 |
| C | -2.65847500 | -3.88579400 | -3.30095000 |
| C | -2.25795700 | -3.59668300 | -1.98912300 |
| C | -0.04074400 | -2.97299200 | -2.79555800 |
| C | -0.45708000 | -3.33912300 | -4.08818200 |
| C | -3.42293800 | -2.06624800 | 0.79811300  |
| C | -3.58003400 | -3.38236200 | 0.35888200  |
| C | -4.13755400 | -4.33141600 | 1.23159400  |
| C | -4.63090000 | -3.95497600 | 2.47556000  |
| C | -4.58342700 | -2.61055200 | 2.84081900  |
| C | -3.98018900 | -1.64218500 | 2.02199100  |
| H | 0.26304000  | -3.26961800 | -4.89813300 |
| H | -5.00816100 | -2.29105900 | 3.78803000  |
| C | -3.33920700 | -4.02593200 | -1.00613300 |
| C | -4.60472800 | -3.90484100 | -1.92176100 |
| H | -4.92998100 | -2.85792000 | -1.93248200 |
| H | -5.44185900 | -4.51151100 | -1.56228700 |
| H | -5.09442200 | -6.03248200 | 0.28744000  |
| H | -3.74114200 | -6.47415300 | 1.32307400  |
| C | -0.98722200 | -3.07703300 | -1.75818300 |
| H | -2.05972000 | -3.99148200 | -5.37454200 |
| H | -5.06294000 | -4.69055900 | 3.14931900  |

|   |             |             |             |
|---|-------------|-------------|-------------|
| C | -4.11114100 | -4.31001000 | -3.32891500 |
| H | -4.67663900 | -3.82244900 | -4.13147000 |
| H | -4.20774900 | -5.39294700 | -3.49018100 |
| C | -4.09573100 | -5.71370000 | 0.61795200  |
| C | -3.14143100 | -5.51922200 | -0.57838100 |
| H | -2.10458500 | -5.65448300 | -0.25006000 |
| H | -3.32500100 | -6.21680600 | -1.40150100 |
| C | -4.03997200 | -0.20914800 | 2.45448300  |
| C | -3.31496800 | 0.22999000  | 3.58810300  |
| C | -4.93486700 | 0.67351600  | 1.79827500  |
| C | -2.38762000 | -0.61051400 | 4.28285500  |
| C | -3.49359400 | 1.58083500  | 4.07431600  |
| C | -5.08238700 | 2.03041800  | 2.27656200  |
| C | -1.70453800 | -0.16077000 | 5.38137400  |
| H | -2.20103000 | -1.60579900 | 3.90236300  |
| C | -2.77128100 | 2.00581000  | 5.23417600  |
| C | -4.36216500 | 2.44494900  | 3.40107800  |
| C | -1.90475100 | 1.16064700  | 5.87288400  |
| H | -0.98448000 | -0.81125800 | 5.86822700  |
| H | -2.92786900 | 3.01991400  | 5.59535500  |
| H | -4.49412400 | 3.46026300  | 3.77107100  |
| H | -1.35758000 | 1.49620800  | 6.74979100  |
| C | 1.37619300  | -2.54194600 | -2.58254000 |
| C | 1.86912800  | -1.38740100 | -3.24102400 |
| C | 2.25294300  | -3.34501200 | -1.81004100 |
| C | 1.02965600  | -0.50287500 | -3.99501200 |
| C | 3.27543000  | -1.06040500 | -3.15670900 |
| C | 3.64596500  | -2.97605800 | -1.69532000 |
| C | 1.54810100  | 0.57853900  | -4.66123300 |
| H | -0.03733400 | -0.68949000 | -4.02094200 |
| C | 3.77677600  | 0.07261100  | -3.87405300 |
| C | 4.12262200  | -1.85498100 | -2.37989900 |
| C | 2.94255600  | 0.86756100  | -4.61383700 |
| H | 0.88570000  | 1.22350200  | -5.23318400 |
| H | 4.84331300  | 0.28072500  | -3.82031300 |
| H | 5.17572500  | -1.59119600 | -2.30527000 |
| H | 3.33704100  | 1.72034200  | -5.15998700 |
| C | -6.61844100 | 1.14520600  | 0.08574900  |
| H | -7.23256600 | 0.80819400  | -0.74518100 |
| C | -5.75012600 | 0.27257900  | 0.69003700  |
| H | -5.68407600 | -0.75048000 | 0.33751900  |
| C | -6.73525100 | 2.48914500  | 0.54205500  |
| H | -7.42794600 | 3.16726000  | 0.05084800  |
| C | -5.98839000 | 2.91330900  | 1.60787900  |

|   |             |             |             |
|---|-------------|-------------|-------------|
| H | -6.08133900 | 3.93135400  | 1.97960300  |
| C | 2.70291800  | -5.28780300 | -0.39658600 |
| H | 2.35104100  | -6.18703800 | 0.10191900  |
| C | 4.06697100  | -4.90305300 | -0.26504600 |
| H | 4.74174000  | -5.50577200 | 0.33668100  |
| C | 4.52189400  | -3.78181000 | -0.90307500 |
| H | 5.56348200  | -3.48030500 | -0.82213200 |
| C | 1.83183700  | -4.54045200 | -1.14467700 |
| H | 0.80044000  | -4.85849400 | -1.23899400 |
| C | -1.28974400 | 3.50631900  | -1.73849200 |
| C | -1.50565300 | 3.25611000  | -0.22109600 |
| H | -2.50274700 | 3.63235200  | 0.06124500  |
| H | -1.56376000 | 2.17491100  | -0.06406200 |
| C | -0.56570700 | 3.78019300  | 0.83444600  |
| C | 0.21127800  | 3.22702300  | -2.09693800 |
| H | 0.79620500  | 4.14318100  | -2.03422600 |
| H | 0.28729700  | 2.86784600  | -3.12623300 |
| N | 0.86553600  | 2.23402600  | -1.24225200 |
| C | 2.09746200  | 2.35990900  | -0.72377000 |
| N | 2.67658600  | 1.26073000  | -0.20937000 |
| C | 4.01377100  | 1.19480700  | 0.28734000  |
| C | 5.07540800  | 1.31857400  | -0.60631300 |
| C | 4.25032500  | 0.91254100  | 1.63442200  |
| C | 6.38491900  | 1.16072600  | -0.15337100 |
| C | 5.56684300  | 0.76985800  | 2.07650400  |
| H | 3.41607300  | 0.80038000  | 2.31893900  |
| C | 6.63887000  | 0.89022000  | 1.18970500  |
| H | 7.65615300  | 0.76929600  | 1.54121800  |
| C | 5.83230700  | 0.42023000  | 3.51894200  |
| C | 7.50044900  | 1.26139800  | -1.15750200 |
| F | 5.81502100  | -0.91580800 | 3.71835600  |
| F | 4.90956300  | 0.95826900  | 4.34192800  |
| F | 7.04620100  | 0.86263600  | 3.92167200  |
| F | 7.27859700  | 0.43299300  | -2.21342600 |
| F | 8.69703600  | 0.93116900  | -0.63330400 |
| F | 7.60919100  | 2.50740300  | -1.66723500 |
| S | 2.87292800  | 3.91354100  | -0.58771700 |
| H | 4.87031900  | 1.50889500  | -1.65356100 |
| H | 2.14971500  | 0.38110400  | -0.12232000 |
| H | 0.42284300  | 1.29862300  | -1.22415600 |
| C | 0.25981400  | 4.91185100  | 0.70167000  |
| H | -0.03436900 | 5.59652300  | -0.09315700 |
| H | 1.31046600  | 4.43968600  | 0.12733900  |
| N | -0.65228800 | -1.03427600 | 1.54624000  |



|   |             |             |             |
|---|-------------|-------------|-------------|
| S | 0.86105100  | -1.02781000 | 2.00413600  |
| O | 1.13749400  | 0.03811700  | 2.98560900  |
| O | 1.84646600  | -1.17689200 | 0.90000800  |
| C | 1.03586200  | -2.61993000 | 2.96673900  |
| F | 0.77233600  | -3.66660000 | 2.18196800  |
| F | 0.18792500  | -2.63605400 | 4.00771100  |
| F | 2.28404300  | -2.72240000 | 3.43251700  |
| C | -2.21237600 | 2.56880500  | -2.56340400 |
| C | -3.24818400 | 1.80895700  | -2.00781000 |
| C | -2.05318600 | 2.51142100  | -3.96080800 |
| C | -4.07466400 | 1.01459100  | -2.80720300 |
| H | -3.43416400 | 1.80530200  | -0.94151500 |
| C | -2.87422700 | 1.72154200  | -4.76271000 |
| H | -1.28322400 | 3.10372200  | -4.44862000 |
| C | -3.89389500 | 0.96242700  | -4.18598200 |
| H | -4.86055000 | 0.43655600  | -2.33107400 |
| H | -2.71714500 | 1.70394900  | -5.83817800 |
| H | -4.53622300 | 0.34226100  | -4.80537700 |
| C | -1.61578300 | 4.98554500  | -2.18828100 |
| H | -0.82183900 | 5.65383000  | -1.83654300 |
| H | -1.54573200 | 5.00709600  | -3.28057900 |
| C | -2.96362300 | 5.55574500  | -1.75873400 |
| C | -4.06865300 | 5.28870400  | -2.47419200 |
| H | -3.95141500 | 4.65702000  | -3.35377100 |
| C | -0.56143500 | 2.97860800  | 2.09515100  |
| H | -0.33296900 | 3.57679600  | 2.97932000  |
| H | -1.51802600 | 2.46907700  | 2.24093200  |
| H | 0.19056600  | 2.17439100  | 2.04676100  |
| C | -2.94025400 | 6.45759300  | -0.54454100 |
| H | -3.92463700 | 6.85931400  | -0.29557800 |
| H | -2.56309800 | 5.94241700  | 0.34850400  |
| H | -2.26922500 | 7.31191900  | -0.71350400 |
| C | 0.87351300  | 5.61475800  | 1.91273700  |
| H | 1.56476100  | 6.39140300  | 1.57215300  |
| H | 0.10329600  | 6.09549500  | 2.52708100  |
| H | 1.44048000  | 4.92610800  | 2.54421000  |
| C | -5.48229600 | 5.72968900  | -2.22156400 |
| H | -6.12645600 | 4.85672600  | -2.04831000 |
| H | -5.58787500 | 6.39581300  | -1.36145900 |
| H | -5.88934800 | 6.24858400  | -3.09978100 |

TS-EF-6RS

l imaginary frequency

H = -5393.924864

G = -5394.130724

E(M06-2X-DCM) = -5394.848707

|   |            |             |             |
|---|------------|-------------|-------------|
| O | 0.86690200 | -3.04620200 | -0.03525000 |
| O | 2.58093100 | -1.14096300 | -0.36085300 |
| P | 0.97335600 | -1.45149800 | -0.40487500 |
| O | 0.30833900 | -0.58916900 | 0.62456600  |
| C | 2.88707000 | -4.68213000 | 3.25323000  |
| C | 3.52505100 | -4.53282400 | 2.02679300  |
| C | 2.84237600 | -4.01243600 | 0.91620400  |
| C | 0.85229900 | -3.72038200 | 2.29856400  |
| C | 1.55602000 | -4.28748600 | 3.37374800  |
| C | 3.37312500 | -1.64179600 | -1.39860500 |
| C | 3.71349000 | -2.99152600 | -1.42214300 |
| C | 4.25158500 | -3.53708300 | -2.59767400 |
| C | 4.58792100 | -2.71524900 | -3.66858500 |
| C | 4.40659900 | -1.33548100 | -3.54771500 |
| C | 3.78834500 | -0.76914800 | -2.42195400 |
| H | 1.04159300 | -4.39772200 | 4.32411200  |
| H | 4.72451900 | -0.67509800 | -4.34938300 |
| C | 3.73806500 | -4.04545200 | -0.31873500 |
| C | 5.15052900 | -4.04091200 | 0.36935200  |
| H | 5.41796700 | -3.00575900 | 0.61119900  |
| H | 5.93243800 | -4.44288000 | -0.28178400 |
| H | 5.41463800 | -5.36231500 | -2.39050900 |
| H | 3.94949100 | -5.56287900 | -3.34399200 |
| C | 1.52389700 | -3.58266700 | 1.06839900  |
| H | 3.41737200 | -5.08931900 | 4.11035700  |
| H | 5.00727600 | -3.13203800 | -4.58087300 |
| C | 4.96208000 | -4.83929300 | 1.67326400  |
| H | 5.66452200 | -4.54194000 | 2.46011000  |
| H | 5.10837100 | -5.91637500 | 1.50810600  |
| C | 4.36630600 | -5.04340700 | -2.47348700 |
| C | 3.57939700 | -5.34309100 | -1.17388500 |
| H | 2.51797800 | -5.48676500 | -1.40505700 |
| H | 3.93441700 | -6.23656300 | -0.64975500 |
| C | 3.66870600 | 0.71810100  | -2.29420100 |
| C | 2.81981000 | 1.45828000  | -3.15155300 |
| C | 4.48656600 | 1.39145100  | -1.35004300 |
| C | 1.95107300 | 0.83510100  | -4.10399900 |
| C | 2.79709900 | 2.90227700  | -3.06350700 |
| C | 4.43885000 | 2.83335900  | -1.26137100 |
| C | 1.14768000 | 1.57909200  | -4.92890100 |
| H | 1.90380600 | -0.24555800 | -4.14487200 |
| C | 1.95215000 | 3.64153700  | -3.95020600 |

|   |              |              |              |
|---|--------------|--------------|--------------|
| C | 3. 59685700  | 3. 54871700  | -2. 11788800 |
| C | 1. 15727800  | 3. 00207100  | -4. 86436000 |
| H | 0. 48261500  | 1. 07158400  | -5. 62057100 |
| H | 1. 96523500  | 4. 72758000  | -3. 88528200 |
| H | 3. 55987900  | 4. 63273000  | -2. 04023100 |
| H | 0. 52861200  | 3. 57636500  | -5. 54087800 |
| C | -0. 56783000 | -3. 30020500 | 2. 51638100  |
| C | -0. 84688900 | -2. 16051000 | 3. 30742400  |
| C | -1. 62405600 | -4. 09595800 | 2. 01455500  |
| C | 0. 18130700  | -1. 31812600 | 3. 84266700  |
| C | -2. 21899500 | -1. 80885900 | 3. 59422700  |
| C | -2. 99205700 | -3. 73562000 | 2. 30986300  |
| C | -0. 11831700 | -0. 22522800 | 4. 61412100  |
| H | 1. 21638300  | -1. 54944200 | 3. 61880700  |
| C | -2. 48940100 | -0. 65902300 | 4. 40207100  |
| C | -3. 25237100 | -2. 60236400 | 3. 08665500  |
| C | -1. 47312600 | 0. 11004700  | 4. 90155000  |
| H | 0. 68422300  | 0. 39973900  | 4. 99635900  |
| H | -3. 52744900 | -0. 41265500 | 4. 61479000  |
| H | -4. 28417600 | -2. 34199900 | 3. 31616900  |
| H | -1. 69316800 | 0. 97924100  | 5. 51561600  |
| C | 6. 16738400  | 1. 38765400  | 0. 42852800  |
| H | 6. 84196400  | 0. 83938100  | 1. 08060600  |
| C | 5. 39247900  | 0. 70846400  | -0. 47510500 |
| H | 5. 46703600  | -0. 37083500 | -0. 53768400 |
| C | 6. 10358600  | 2. 80662300  | 0. 52039400  |
| H | 6. 72450500  | 3. 32779800  | 1. 24399900  |
| C | 5. 26535600  | 3. 50535800  | -0. 30596900 |
| H | 5. 20269500  | 4. 58836500  | -0. 24820300 |
| C | -2. 44058700 | -6. 04518300 | 0. 78756100  |
| H | -2. 24097800 | -6. 93850700 | 0. 20200300  |
| C | -3. 78737900 | -5. 68592900 | 1. 08056000  |
| H | -4. 60125600 | -6. 31021100 | 0. 72116200  |
| C | -4. 05109400 | -4. 56363300 | 1. 82006600  |
| H | -5. 07497900 | -4. 28365900 | 2. 05746400  |
| C | -1. 39883900 | -5. 27883100 | 1. 23959400  |
| H | -0. 37847900 | -5. 56805900 | 1. 01432200  |
| N | 0. 54942100  | -1. 39861300 | -1. 95728000 |
| S | -0. 86477400 | -1. 22163600 | -2. 61448300 |
| O | -0. 76050800 | -1. 07216400 | -4. 06717700 |
| O | -1. 76832100 | -0. 25748600 | -1. 91758400 |
| C | -1. 73020600 | -2. 86241900 | -2. 36760100 |
| F | -0. 94182500 | -3. 86916200 | -2. 75178200 |
| F | -2. 85718000 | -2. 89777400 | -3. 08715000 |

|   |             |             |             |
|---|-------------|-------------|-------------|
| F | -2.03898600 | -3.02550700 | -1.07038000 |
| C | -5.04148700 | 1.42703400  | -0.86205600 |
| C | -4.35919500 | 2.02009800  | -2.16001800 |
| H | -5.17055300 | 2.32192700  | -2.83973200 |
| H | -3.83845200 | 1.19421000  | -2.64842000 |
| C | -3.39533300 | 3.18150000  | -2.09977000 |
| C | -4.07904600 | 1.49527200  | 0.36184800  |
| H | -4.30793600 | 2.38504400  | 0.94357400  |
| H | -4.26422800 | 0.64680700  | 1.02680200  |
| N | -2.64320400 | 1.55000600  | 0.06810200  |
| C | -1.77824000 | 2.39314400  | 0.67794000  |
| N | -0.49287400 | 2.00808200  | 0.72110300  |
| C | 0.62137200  | 2.72345200  | 1.23840100  |
| C | 0.88788400  | 4.06056200  | 0.92923600  |
| C | 1.50760500  | 2.00530100  | 2.04646900  |
| C | 2.00857100  | 4.68180400  | 1.47863400  |
| C | 2.62785800  | 2.63940900  | 2.58094600  |
| H | 1.31366500  | 0.95778400  | 2.24514000  |
| C | 2.88103500  | 3.98292200  | 2.31473800  |
| H | 3.74803700  | 4.47370200  | 2.73907500  |
| C | 3.52360000  | 1.86070100  | 3.50776900  |
| C | 2.32087900  | 6.10853800  | 1.11465100  |
| F | 2.99342500  | 1.79101500  | 4.75854000  |
| F | 3.69742300  | 0.59127500  | 3.09149100  |
| F | 4.74260500  | 2.42680400  | 3.63218000  |
| F | 2.89819700  | 6.77181800  | 2.13863300  |
| F | 3.18599600  | 6.18792800  | 0.06774400  |
| F | 1.21596400  | 6.79441600  | 0.75214800  |
| S | -2.32815100 | 3.92416500  | 1.29345800  |
| H | 0.22806700  | 4.61579000  | 0.27796800  |
| H | -0.28646400 | 0.99748300  | 0.56042400  |
| H | -2.23325000 | 0.74481400  | -0.42400400 |
| C | -3.66470900 | 4.37859000  | -1.42317200 |
| H | -4.70394300 | 4.50843600  | -1.11866800 |
| H | -3.14707100 | 4.11627700  | -0.23781300 |
| C | -6.32050000 | 2.25972900  | -0.47147200 |
| H | -7.04327500 | 2.18158700  | -1.29254200 |
| H | -6.03144500 | 3.31307000  | -0.42007200 |
| C | -5.45112700 | -0.01110200 | -1.25617500 |
| C | -4.84645700 | -1.15843900 | -0.72618000 |
| C | -6.44593100 | -0.19749400 | -2.23334800 |
| C | -5.24919800 | -2.43758700 | -1.12045800 |
| H | -4.03672300 | -1.08628700 | -0.00870400 |
| C | -6.84823000 | -1.47016800 | -2.63234500 |

|   |             |             |             |
|---|-------------|-------------|-------------|
| H | -6.92287800 | 0.66081900  | -2.69832200 |
| C | -6.25745000 | -2.60056300 | -2.06696500 |
| H | -4.75219600 | -3.30146900 | -0.69142200 |
| H | -7.62346200 | -1.57544800 | -3.38688000 |
| H | -6.56794600 | -3.59541300 | -2.37408900 |
| C | -7.01411100 | 1.91139500  | 0.83861200  |
| C | -6.93222600 | 2.77697900  | 1.86492300  |
| H | -6.35261500 | 3.68839000  | 1.70632900  |
| C | -7.80935200 | 0.62699100  | 0.88403200  |
| H | -8.47369400 | 0.55293700  | 0.01396400  |
| H | -7.16182500 | -0.25627400 | 0.84699800  |
| H | -8.42622400 | 0.55350200  | 1.78245900  |
| C | -7.53720800 | 2.67401800  | 3.23650800  |
| H | -6.75272700 | 2.69358300  | 4.00519600  |
| H | -8.19022900 | 3.53393600  | 3.43842600  |
| H | -8.12443300 | 1.76488700  | 3.38640200  |
| C | -2.14142700 | 2.99992000  | -2.89494700 |
| H | -1.36196300 | 3.72795200  | -2.66401700 |
| H | -1.74680900 | 1.98449600  | -2.79585400 |
| H | -2.39537900 | 3.12870500  | -3.96003800 |
| C | -2.97261500 | 5.69939900  | -1.75468800 |
| H | -3.33271700 | 6.09880700  | -2.70993300 |
| H | -3.19383700 | 6.43678100  | -0.97712700 |
| H | -1.88573500 | 5.60349800  | -1.81599100 |

TS-EF-6RS-1

l imaginary frequency

H = -5393.916670

G = -5394.124067

E(M06-2X-DCM) = -5394.848652

|   |            |             |             |
|---|------------|-------------|-------------|
| O | 2.42711500 | -1.66326900 | -0.31837800 |
| O | 1.80033900 | 0.50948300  | -1.60065700 |
| P | 1.25765600 | -0.53789100 | -0.45037800 |
| O | 1.05243300 | 0.29362200  | 0.78305900  |
| C | 6.38385600 | -0.58692100 | 0.51763200  |
| C | 5.89022700 | -0.51852400 | -0.78081400 |
| C | 4.58273900 | -0.93559400 | -1.07478500 |
| C | 4.22503100 | -1.44429600 | 1.28867600  |
| C | 5.55963000 | -1.07467300 | 1.53032300  |
| C | 1.93005100 | 0.07067000  | -2.92017300 |
| C | 3.03331000 | -0.69925300 | -3.28451500 |
| C | 3.05161400 | -1.31166900 | -4.54841800 |
| C | 2.05672200 | -1.04403100 | -5.48147100 |
| C | 1.03927400 | -0.15015500 | -5.14728300 |

|   |             |             |             |
|---|-------------|-------------|-------------|
| C | 0.94118800  | 0.41292600  | -3.86477400 |
| H | 5.94253900  | -1.16394400 | 2.54258500  |
| H | 0.28065200  | 0.10527500  | -5.88124000 |
| C | 4.36793000  | -0.94877900 | -2.58530700 |
| C | 5.41516600  | 0.13509600  | -3.01934900 |
| H | 4.96417400  | 1.12696700  | -2.89569300 |
| H | 5.71102100  | 0.03416500  | -4.06778100 |
| H | 5.00763000  | -1.82422800 | -5.34282700 |
| H | 3.96361300  | -3.21712800 | -5.08121300 |
| C | 3.74753200  | -1.33002500 | -0.03090800 |
| H | 7.40077600  | -0.27564500 | 0.74330100  |
| H | 2.07240900  | -1.51192900 | -6.46252700 |
| C | 6.58720200  | -0.02872000 | -2.03039600 |
| H | 7.13971200  | 0.90395000  | -1.86779100 |
| H | 7.31633300  | -0.76685600 | -2.39324000 |
| C | 4.24182300  | -2.23901800 | -4.67257000 |
| C | 4.75019100  | -2.32860500 | -3.21622800 |
| H | 4.20470700  | -3.11675500 | -2.68633000 |
| H | 5.82059200  | -2.54413000 | -3.13938100 |
| C | -0.15330000 | 1.39385600  | -3.58080800 |
| C | -1.50884200 | 0.98292900  | -3.59755700 |
| C | 0.17093600  | 2.76369100  | -3.40630900 |
| C | -1.90090000 | -0.38565900 | -3.75421700 |
| C | -2.55721600 | 1.96804600  | -3.44140800 |
| C | -0.88607900 | 3.72963700  | -3.20377400 |
| C | -3.22182200 | -0.74689800 | -3.79448200 |
| H | -1.13521200 | -1.14811000 | -3.80786400 |
| C | -3.92400300 | 1.54962000  | -3.50421800 |
| C | -2.21831200 | 3.30710300  | -3.23177100 |
| C | -4.25073200 | 0.23198300  | -3.68580600 |
| H | -3.48612300 | -1.79590100 | -3.88393500 |
| H | -4.69892000 | 2.30654900  | -3.40438600 |
| H | -3.01107300 | 4.04147400  | -3.10246900 |
| H | -5.29097500 | -0.07838000 | -3.71576300 |
| C | 3.40268100  | -1.97340000 | 2.42040000  |
| C | 3.13715600  | -1.14589200 | 3.53972000  |
| C | 2.98379600  | -3.32769600 | 2.42220300  |
| C | 3.49760700  | 0.24069500  | 3.58577900  |
| C | 2.47039600  | -1.70009100 | 4.69678200  |
| C | 2.27781100  | -3.85423600 | 3.56853400  |
| C | 3.27497200  | 1.00228100  | 4.70479500  |
| H | 3.94581700  | 0.69498100  | 2.70994800  |
| C | 2.26015900  | -0.87285700 | 5.84583300  |
| C | 2.05107900  | -3.03248300 | 4.67554400  |

|   |              |              |              |
|---|--------------|--------------|--------------|
| C | 2. 66026400  | 0. 43776200  | 5. 85965700  |
| H | 3. 56477900  | 2. 04968200  | 4. 70588600  |
| H | 1. 78252900  | -1. 31673200 | 6. 71681600  |
| H | 1. 54279200  | -3. 44389700 | 5. 54556500  |
| H | 2. 50893600  | 1. 04947500  | 6. 74565600  |
| C | 1. 79587600  | 4. 59022800  | -3. 28705200 |
| H | 2. 82464200  | 4. 93625300  | -3. 33939700 |
| C | 1. 51421200  | 3. 25953800  | -3. 45959700 |
| H | 2. 32003300  | 2. 56148000  | -3. 65646000 |
| C | 0. 75340800  | 5. 52974900  | -3. 04630900 |
| H | 0. 99510200  | 6. 58016100  | -2. 90860000 |
| C | -0. 54848000 | 5. 10687200  | -3. 01107100 |
| H | -1. 35781600 | 5. 81562300  | -2. 85091100 |
| C | 2. 82677200  | -5. 52932500 | 1. 37580700  |
| H | 3. 03481200  | -6. 18519500 | 0. 53502500  |
| C | 2. 10752100  | -6. 03358900 | 2. 49538000  |
| H | 1. 77039500  | -7. 06639900 | 2. 49824500  |
| C | 1. 84768900  | -5. 21764700 | 3. 56173100  |
| H | 1. 30738400  | -5. 59054600 | 4. 42860100  |
| C | 3. 25284200  | -4. 22832800 | 1. 34300200  |
| H | 3. 80207900  | -3. 86871900 | 0. 48159400  |
| N | -0. 03253600 | -1. 28923500 | -1. 06643400 |
| S | -0. 47875600 | -2. 82413300 | -0. 91795600 |
| O | -1. 85328000 | -2. 94450500 | -1. 42013500 |
| O | -0. 13813600 | -3. 43740900 | 0. 37320300  |
| C | 0. 51961900  | -3. 77835500 | -2. 19331500 |
| F | 0. 50518600  | -3. 14335900 | -3. 37577500 |
| F | -0. 03011700 | -4. 98662400 | -2. 35034000 |
| F | 1. 79607700  | -3. 94002100 | -1. 81682200 |
| C | 0. 07498600  | 3. 79767400  | 2. 20079600  |
| C | 0. 18747200  | 2. 70504600  | 3. 34336800  |
| H | 0. 53801300  | 3. 22480800  | 4. 24772600  |
| H | 0. 98900500  | 2. 02228100  | 3. 05723100  |
| C | -0. 98851300 | 1. 85931200  | 3. 76083500  |
| C | -0. 95204600 | 3. 37406600  | 1. 10604200  |
| H | -1. 91564000 | 3. 82915600  | 1. 32554700  |
| H | -0. 64182300 | 3. 77325200  | 0. 13528000  |
| N | -1. 18588800 | 1. 93477900  | 0. 96844900  |
| C | -2. 40014300 | 1. 35611300  | 0. 87159400  |
| N | -2. 45726900 | 0. 11897500  | 0. 33910100  |
| C | -3. 59113700 | -0. 75536400 | 0. 39091900  |
| C | -3. 47141200 | -1. 97044900 | 1. 06543300  |
| C | -4. 77723500 | -0. 42568400 | -0. 26315600 |
| C | -4. 55625300 | -2. 84749800 | 1. 10019000  |

|   |             |             |             |
|---|-------------|-------------|-------------|
| C | -5.85530300 | -1.30953200 | -0.21913400 |
| H | -4.84975700 | 0.50185200  | -0.81585900 |
| C | -5.75283100 | -2.52109400 | 0.46426900  |
| H | -6.59173400 | -3.20616700 | 0.49333100  |
| C | -7.11066900 | -0.97809900 | -0.98066600 |
| C | -4.45411900 | -4.12634100 | 1.89046200  |
| F | -7.02783000 | -1.36868200 | -2.27816800 |
| F | -8.19472500 | -1.59034400 | -0.45881400 |
| F | -7.35559700 | 0.35014800  | -0.99174900 |
| F | -4.82515100 | -3.93111800 | 3.18211700  |
| F | -5.26447100 | -5.08686500 | 1.39468000  |
| F | -3.20023500 | -4.60993800 | 1.91070900  |
| S | -3.81474600 | 2.12559400  | 1.52383900  |
| H | -2.53291500 | -2.24440000 | 1.53510200  |
| H | -1.62190800 | -0.26676100 | -0.12687300 |
| H | -0.35763100 | 1.34272600  | 0.76359100  |
| C | -2.23130900 | 2.39780300  | 4.13122800  |
| H | -2.22539500 | 3.47522600  | 4.30420300  |
| H | -2.84725600 | 2.36374000  | 2.99069200  |
| C | -0.43825000 | 5.16361300  | 2.78811200  |
| H | 0.30427100  | 5.52978400  | 3.50776900  |
| H | -1.34457900 | 4.95902600  | 3.36556400  |
| C | 1.52516300  | 3.93843400  | 1.68235400  |
| C | 2.51026800  | 4.48908000  | 2.52350000  |
| C | 1.94018100  | 3.45241400  | 0.43685400  |
| C | 3.84456600  | 4.57090500  | 2.12948200  |
| H | 2.24293800  | 4.85966300  | 3.50914600  |
| C | 3.27750700  | 3.52977000  | 0.03892500  |
| H | 1.24211400  | 2.98505400  | -0.24602200 |
| C | 4.23621300  | 4.09166100  | 0.87796600  |
| H | 4.57701700  | 5.00902800  | 2.80275400  |
| H | 3.55632500  | 3.13306900  | -0.93205000 |
| H | 5.27591600  | 4.15001500  | 0.56754500  |
| C | -0.76296900 | 6.27443500  | 1.79965900  |
| C | -2.04405600 | 6.65602500  | 1.65229600  |
| H | -2.79496400 | 6.12997700  | 2.24468900  |
| C | 0.39491400  | 6.91847100  | 1.07231500  |
| H | 1.21526700  | 7.14053500  | 1.76546700  |
| H | 0.81253500  | 6.25636500  | 0.30452000  |
| H | 0.10686800  | 7.85254300  | 0.58424600  |
| C | -0.72170200 | 0.39158900  | 3.82955500  |
| H | -1.62720500 | -0.21124900 | 3.92144200  |
| H | -0.12305800 | 0.05245800  | 2.97805800  |
| H | -0.10350300 | 0.20270200  | 4.72297600  |



|   |             |            |            |
|---|-------------|------------|------------|
| C | -3.22596700 | 1.65519200 | 5.02358500 |
| H | -2.85587000 | 1.59139500 | 6.05329300 |
| H | -4.17711800 | 2.19563700 | 5.03945800 |
| H | -3.43258700 | 0.64214300 | 4.67001100 |
| C | -2.61078400 | 7.72892900 | 0.76605400 |
| H | -3.17167100 | 8.46554300 | 1.35716600 |
| H | -1.85090900 | 8.26659000 | 0.19375200 |
| H | -3.32408700 | 7.29904900 | 0.04958300 |

TS-EF-6RS-2

l imaginary frequency

H = -5393.924562

G = -5394.131032

E(M06-2X-DCM) = -5394.847790

|   |            |             |             |
|---|------------|-------------|-------------|
| O | 1.45726500 | -2.76250400 | -0.05025700 |
| O | 2.87940500 | -0.64307300 | -0.46779500 |
| P | 1.33426400 | -1.13758600 | -0.26590600 |
| O | 0.77695700 | -0.43468800 | 0.92841400  |
| C | 3.83429100 | -4.15808300 | 3.10764300  |
| C | 4.39524200 | -3.86072100 | 1.87050500  |
| C | 3.59020500 | -3.44824700 | 0.79785300  |
| C | 1.62416400 | -3.56471100 | 2.23971500  |
| C | 2.45617100 | -4.03024200 | 3.27236200  |
| C | 3.59957600 | -1.06755900 | -1.58442200 |
| C | 4.16127500 | -2.34255900 | -1.59886200 |
| C | 4.70047700 | -2.83754900 | -2.79652300 |
| C | 4.80321600 | -2.02111400 | -3.91784100 |
| C | 4.37273000 | -0.69618400 | -3.83286300 |
| C | 3.75157000 | -0.19249700 | -2.67823100 |
| H | 2.00118700 | -4.27432600 | 4.22791600  |
| H | 4.49527200 | -0.03241700 | -4.68373300 |
| C | 4.42726600 | -3.33755500 | -0.47247500 |
| C | 5.84163200 | -3.07563700 | 0.15392800  |
| H | 5.92927800 | -2.00785200 | 0.38556400  |
| H | 6.65556500 | -3.33621600 | -0.52948600 |
| H | 6.19393400 | -4.40287000 | -2.60603900 |
| H | 4.74536300 | -4.91306200 | -3.46528400 |
| C | 2.22449000 | -3.25444000 | 1.00357600  |
| H | 4.45639000 | -4.48330800 | 3.93771000  |
| H | 5.22845900 | -2.39838700 | -4.84457700 |
| C | 5.85128800 | -3.89018900 | 1.46345400  |
| H | 6.51100100 | -3.46039500 | 2.22582200  |
| H | 6.19561100 | -4.92007300 | 1.29213400  |
| C | 5.10119300 | -4.28946900 | -2.63700100 |

|   |              |              |              |
|---|--------------|--------------|--------------|
| C | 4. 45569500  | -4. 67324800 | -1. 28539500 |
| H | 3. 42505000  | -5. 00890500 | -1. 44740400 |
| H | 4. 98995900  | -5. 47160600 | -0. 76030600 |
| C | 3. 33822600  | 1. 24443800  | -2. 62160400 |
| C | 2. 34726100  | 1. 74287400  | -3. 50276500 |
| C | 4. 01216100  | 2. 12781200  | -1. 73905900 |
| C | 1. 61970800  | 0. 90377800  | -4. 40717900 |
| C | 2. 03182000  | 3. 15461600  | -3. 49892300 |
| C | 3. 65952600  | 3. 52936300  | -1. 72207600 |
| C | 0. 69509700  | 1. 42232200  | -5. 27493000 |
| H | 1. 78869300  | -0. 16528200 | -4. 37678000 |
| C | 1. 06109600  | 3. 65607400  | -4. 42273400 |
| C | 2. 68084400  | 4. 00401900  | -2. 59960600 |
| C | 0. 41958600  | 2. 81921700  | -5. 29649600 |
| H | 0. 14926500  | 0. 75801400  | -5. 93843300 |
| H | 0. 85572700  | 4. 72461300  | -4. 42147300 |
| H | 2. 42534800  | 5. 06138500  | -2. 58512600 |
| H | -0. 30521200 | 3. 21450400  | -6. 00426800 |
| C | 0. 15482700  | -3. 45274400 | 2. 50287700  |
| C | -0. 32066000 | -2. 50751700 | 3. 44450000  |
| C | -0. 74225700 | -4. 36778500 | 1. 89947700  |
| C | 0. 53218000  | -1. 54678500 | 4. 08045000  |
| C | -1. 72328400 | -2. 48994200 | 3. 79391900  |
| C | -2. 14433800 | -4. 32947500 | 2. 24799400  |
| C | 0. 04673300  | -0. 66647900 | 5. 01362200  |
| H | 1. 57854400  | -1. 50845800 | 3. 80197500  |
| C | -2. 18980700 | -1. 55261900 | 4. 76908200  |
| C | -2. 59571000 | -3. 39523900 | 3. 18412900  |
| C | -1. 33293900 | -0. 67094600 | 5. 36954500  |
| H | 0. 71622300  | 0. 05424700  | 5. 47455500  |
| H | -3. 24701200 | -1. 56145100 | 5. 02523200  |
| H | -3. 64934000 | -3. 38396900 | 3. 45759000  |
| H | -1. 69911600 | 0. 03306800  | 6. 11203300  |
| C | 5. 69555900  | 2. 58370000  | -0. 02329800 |
| H | 6. 49182900  | 2. 23075800  | 0. 62673200  |
| C | 5. 06569400  | 1. 70512200  | -0. 86551200 |
| H | 5. 37419800  | 0. 66645800  | -0. 88109300 |
| C | 5. 32053100  | 3. 95636500  | 0. 00974400  |
| H | 5. 82584700  | 4. 63822900  | 0. 68854500  |
| C | 4. 33275500  | 4. 41241700  | -0. 82046400 |
| H | 4. 03954500  | 5. 45823000  | -0. 80985200 |
| C | -1. 20593300 | -6. 25798400 | 0. 41946000  |
| H | -0. 85424000 | -7. 00831600 | -0. 28340400 |
| C | -2. 58762700 | -6. 20992300 | 0. 75964800  |

|   |             |             |             |
|---|-------------|-------------|-------------|
| H | -3.27644500 | -6.92538800 | 0.31816400  |
| C | -3.03871900 | -5.27295400 | 1.65063100  |
| H | -4.08852200 | -5.23615300 | 1.93381500  |
| C | -0.31795800 | -5.37306500 | 0.97235900  |
| H | 0.73172700  | -5.43092900 | 0.70874300  |
| N | 0.64063400  | -0.98046500 | -1.72516600 |
| S | -0.89681200 | -1.15609900 | -2.00100000 |
| O | -1.37320300 | -0.27025000 | -3.07846300 |
| O | -1.74558900 | -1.20435300 | -0.77536000 |
| C | -1.06479300 | -2.86836200 | -2.73275700 |
| F | -0.30851700 | -2.96499700 | -3.83275200 |
| F | -2.34164900 | -3.09046100 | -3.06711900 |
| F | -0.67734000 | -3.79629000 | -1.85520000 |
| C | -5.20324900 | 0.79782200  | -0.90140100 |
| C | -4.46554400 | 1.48871600  | -2.11846800 |
| H | -5.22829300 | 1.68536100  | -2.88922900 |
| H | -3.78387100 | 0.75373000  | -2.55218100 |
| C | -3.70030000 | 2.77869400  | -1.96720100 |
| C | -4.40744900 | 1.01594000  | 0.41809200  |
| H | -4.75158800 | 1.92973600  | 0.89716700  |
| H | -4.63388100 | 0.20834400  | 1.12036300  |
| N | -2.95122800 | 1.12983900  | 0.27943800  |
| C | -2.19140400 | 2.03468500  | 0.93865300  |
| N | -0.88245000 | 1.75427600  | 1.07443100  |
| C | 0.11954600  | 2.61355600  | 1.61390600  |
| C | 0.35587100  | 3.89330600  | 1.10792100  |
| C | 0.93487900  | 2.10142700  | 2.62383300  |
| C | 1.38255000  | 4.66850700  | 1.64550100  |
| C | 1.96592900  | 2.88359900  | 3.14455000  |
| H | 0.77107500  | 1.09162200  | 2.97944500  |
| C | 2.19296200  | 4.17290300  | 2.66800300  |
| H | 3.00015000  | 4.77308000  | 3.06844900  |
| C | 2.80146500  | 2.31754000  | 4.26219900  |
| C | 1.58595900  | 6.06765700  | 1.13066700  |
| F | 2.11505000  | 2.30644300  | 5.43491100  |
| F | 3.16445800  | 1.03970600  | 4.02069100  |
| F | 3.92680300  | 3.03146500  | 4.47203000  |
| F | 0.74232000  | 6.94694300  | 1.71783800  |
| F | 2.84075700  | 6.51674600  | 1.35460300  |
| F | 1.36061100  | 6.15002700  | -0.20415000 |
| S | -2.87152000 | 3.52232300  | 1.52414500  |
| H | -0.24502200 | 4.27737500  | 0.29424600  |
| H | -0.52679800 | 0.79342500  | 0.90266600  |
| H | -2.46452800 | 0.29944500  | -0.09855500 |

|   |             |             |             |
|---|-------------|-------------|-------------|
| C | -4.17142000 | 3.89049300  | -1.24309500 |
| H | -5.22949300 | 3.84874700  | -0.98302200 |
| H | -3.66356200 | 3.66638100  | -0.09350900 |
| C | -6.63159300 | 1.42673800  | -0.68361800 |
| H | -7.22689600 | 1.22359700  | -1.58231100 |
| H | -6.52127300 | 2.51344100  | -0.63074700 |
| C | -5.35596500 | -0.68623400 | -1.30879600 |
| C | -4.75978400 | -1.74674600 | -0.61503700 |
| C | -6.11038800 | -1.00466800 | -2.45305800 |
| C | -4.92129100 | -3.06983000 | -1.03550600 |
| H | -4.13242800 | -1.56926500 | 0.24949000  |
| C | -6.27865500 | -2.32185100 | -2.87354300 |
| H | -6.57760700 | -0.21518200 | -3.03587900 |
| C | -5.68605800 | -3.36523000 | -2.16090900 |
| H | -4.42457000 | -3.86294300 | -0.48430100 |
| H | -6.86954300 | -2.53015700 | -3.76168700 |
| H | -5.80826500 | -4.39385500 | -2.48882400 |
| C | -7.41574800 | 0.98370200  | 0.54410800  |
| C | -7.55317100 | 1.84147200  | 1.57084200  |
| H | -7.07784600 | 2.81951200  | 1.47377300  |
| C | -2.40220700 | 2.85279600  | -2.70213000 |
| H | -2.61414200 | 3.18483400  | -3.73252300 |
| H | -1.71611800 | 3.59249300  | -2.28183500 |
| H | -1.90726100 | 1.88163500  | -2.78401700 |
| C | -8.05011300 | -0.38759900 | 0.50211600  |
| H | -7.30175600 | -1.18665200 | 0.54438300  |
| H | -8.75465900 | -0.54358000 | 1.32214600  |
| H | -8.59488900 | -0.53041900 | -0.43974500 |
| C | -3.68921300 | 5.31445100  | -1.52321400 |
| H | -4.07259200 | 5.67374500  | -2.48523600 |
| H | -4.05658300 | 5.98517800  | -0.74092100 |
| H | -2.59966900 | 5.39590500  | -1.54034200 |
| C | -8.28354500 | 1.64812000  | 2.86962200  |
| H | -7.59355800 | 1.75278000  | 3.71794300  |
| H | -9.05483600 | 2.41928200  | 3.00038800  |
| H | -8.76702100 | 0.67205800  | 2.95555600  |

TS-EF-6RS-3

1 imaginary frequency

H = -5393.921928

G = -5394.129142

E(M06-2X-DCM) = -5394.846655

|   |            |             |             |
|---|------------|-------------|-------------|
| 0 | 1.18703900 | -2.85051500 | -0.14441900 |
| 0 | 2.80129100 | -0.87097200 | -0.55224500 |

|   |             |              |              |
|---|-------------|--------------|--------------|
| P | 1. 22171100 | -1. 21482800 | -0. 30669800 |
| O | 0. 77933800 | -0. 49942500 | 0. 92759900  |
| C | 3. 51911700 | -4. 57555300 | 2. 88174800  |
| C | 4. 06475500 | -4. 29443800 | 1. 63401800  |
| C | 3. 26869500 | -3. 77068200 | 0. 60410000  |
| C | 1. 34998600 | -3. 74266300 | 2. 11240300  |
| C | 2. 16647200 | -4. 32021500 | 3. 09997300  |
| C | 3. 43486600 | -1. 32827200 | -1. 70760700 |
| C | 3. 86511200 | -2. 65140500 | -1. 77977000 |
| C | 4. 31015800 | -3. 15890800 | -3. 01036700 |
| C | 4. 45473700 | -2. 32125200 | -4. 11122900 |
| C | 4. 16193600 | -0. 96370200 | -3. 97247200 |
| C | 3. 63496800 | -0. 43808700 | -2. 78130200 |
| H | 1. 72168900 | -4. 55057800 | 4. 06369100  |
| H | 4. 32053100 | -0. 28846600 | -4. 80821200 |
| C | 4. 06894700 | -3. 70285100 | -0. 69263700 |
| C | 5. 52290500 | -3. 60151000 | -0. 11223700 |
| H | 5. 72465100 | -2. 55535800 | 0. 14540700  |
| H | 6. 28302000 | -3. 91969800 | -0. 83227700 |
| H | 5. 64594600 | -4. 86884800 | -2. 92013700 |
| H | 4. 12498400 | -5. 20655100 | -3. 73840800 |
| C | 1. 93644000 | -3. 45088200 | 0. 86522800  |
| H | 4. 13360500 | -4. 98658200 | 3. 67877600  |
| H | 4. 80773300 | -2. 70881600 | -5. 06369700 |
| C | 5. 49614300 | -4. 45353300 | 1. 17302900  |
| H | 6. 22056200 | -4. 11435800 | 1. 92225500  |
| H | 5. 73088700 | -5. 50635000 | 0. 96076100  |
| C | 4. 56950100 | -4. 64753200 | -2. 90687800 |
| C | 3. 93612100 | -5. 00844300 | -1. 54332300 |
| H | 2. 87214300 | -5. 23547100 | -1. 67592000 |
| H | 4. 40596200 | -5. 87179300 | -1. 06122900 |
| C | 3. 37029700 | 1. 03014700  | -2. 66868600 |
| C | 2. 40830800 | 1. 65330000  | -3. 50128500 |
| C | 4. 15724800 | 1. 81301800  | -1. 78469900 |
| C | 1. 57089500 | 0. 92055100  | -4. 40317100 |
| C | 2. 23936000 | 3. 08894200  | -3. 44796600 |
| C | 3. 94873800 | 3. 24153700  | -1. 71543300 |
| C | 0. 67921100 | 1. 55689500  | -5. 22586300 |
| H | 1. 62927000 | -0. 16065900 | -4. 40676600 |
| C | 1. 29865000 | 3. 71471800  | -4. 32582000 |
| C | 2. 99790500 | 3. 83985600  | -2. 54671200 |
| C | 0. 54900700 | 2. 97471700  | -5. 20093800 |
| H | 0. 04838300 | 0. 97224200  | -5. 88902400 |
| H | 1. 20459400 | 4. 79811700  | -4. 28884200 |

|   |             |             |             |
|---|-------------|-------------|-------------|
| H | 2.85219900  | 4.91666500  | -2.49436900 |
| H | -0.15131100 | 3.46340700  | -5.87422300 |
| C | -0.09242100 | -3.50254300 | 2.43336100  |
| C | -0.44362700 | -2.54988600 | 3.42087000  |
| C | -1.09162100 | -4.31273100 | 1.84046500  |
| C | 0.51694600  | -1.69087800 | 4.04871200  |
| C | -1.82417100 | -2.41905500 | 3.82926600  |
| C | -2.46932700 | -4.16346200 | 2.25082300  |
| C | 0.14992500  | -0.80217100 | 5.02692700  |
| H | 1.55065300  | -1.73685700 | 3.72748500  |
| C | -2.16556000 | -1.47639300 | 4.85004200  |
| C | -2.79758400 | -3.22412700 | 3.23201200  |
| C | -1.20959400 | -0.69512600 | 5.43980900  |
| H | 0.89931400  | -0.16017600 | 5.48109400  |
| H | -3.20840200 | -1.39950000 | 5.15001100  |
| H | -3.83406800 | -3.12976700 | 3.55119100  |
| H | -1.48121300 | 0.01370600  | 6.21750600  |
| C | 5.92997800  | 2.04301800  | -0.11438600 |
| H | 6.70642100  | 1.59158500  | 0.49756900  |
| C | 5.18956100  | 1.25944300  | -0.96036900 |
| H | 5.39189400  | 0.19641700  | -1.01718900 |
| C | 5.69553400  | 3.44424900  | -0.02784400 |
| H | 6.28680000  | 4.04981600  | 0.65387900  |
| C | 4.73401100  | 4.02323900  | -0.81083600 |
| H | 4.54737400  | 5.09199400  | -0.75923300 |
| C | -1.78208900 | -6.10328700 | 0.32528700  |
| H | -1.52777600 | -6.85642100 | -0.41554500 |
| C | -3.13842900 | -5.94806200 | 0.72921600  |
| H | -3.90546000 | -6.58598600 | 0.29799100  |
| C | -3.46728500 | -5.00620000 | 1.66718500  |
| H | -4.49675100 | -4.88898800 | 1.99917000  |
| C | -0.79703000 | -5.31837500 | 0.86472500  |
| H | 0.23141600  | -5.45825200 | 0.55271100  |
| N | 0.49879600  | -0.93957500 | -1.73393700 |
| S | -1.05698900 | -0.95328800 | -1.95762400 |
| O | -1.47939400 | 0.02175600  | -2.97996900 |
| O | -1.86489600 | -0.97201900 | -0.70406800 |
| C | -1.41531400 | -2.60756200 | -2.75093300 |
| F | -0.70069600 | -2.73222900 | -3.87600000 |
| F | -2.71572100 | -2.68718300 | -3.05573900 |
| F | -1.10002900 | -3.60510300 | -1.92226400 |
| C | -5.08478600 | 1.34674300  | -0.73534800 |
| C | -4.31126400 | 2.01362300  | -1.94351700 |
| H | -5.06457300 | 2.30025500  | -2.69518000 |

|   |             |             |             |
|---|-------------|-------------|-------------|
| H | -3.69712500 | 1.24175200  | -2.41249800 |
| C | -3.44671300 | 3.23353400  | -1.76573800 |
| C | -4.26060400 | 1.48781400  | 0.57469200  |
| H | -4.49246700 | 2.44080800  | 1.04373500  |
| H | -4.56690400 | 0.71326600  | 1.28424000  |
| N | -2.80307500 | 1.44098200  | 0.42121700  |
| C | -1.94115500 | 2.24718600  | 1.08282900  |
| N | -0.66491400 | 1.83172600  | 1.18011500  |
| C | 0.43106000  | 2.57143500  | 1.71423600  |
| C | 0.78242100  | 3.83451000  | 1.23360300  |
| C | 1.21506600  | 1.95324600  | 2.68896000  |
| C | 1.89443700  | 4.48859800  | 1.76229700  |
| C | 2.33208500  | 2.61413700  | 3.20052800  |
| H | 0.95946100  | 0.95545700  | 3.02374200  |
| C | 2.67572800  | 3.88683400  | 2.74991300  |
| H | 3.54875800  | 4.39229200  | 3.14293300  |
| C | 3.13454000  | 1.93751000  | 4.28031500  |
| C | 2.22536700  | 5.87401000  | 1.27730200  |
| F | 2.48051900  | 1.96304100  | 5.47112000  |
| F | 3.36136300  | 0.63678400  | 3.99767200  |
| F | 4.33087600  | 2.52966000  | 4.47597800  |
| F | 1.49358800  | 6.81739400  | 1.91304500  |
| F | 3.52557300  | 6.18652800  | 1.47332000  |
| F | 1.97185000  | 6.01725600  | -0.04724000 |
| S | -2.45297600 | 3.77839200  | 1.72484700  |
| H | 0.20362000  | 4.29838200  | 0.44594300  |
| H | -0.41125400 | 0.84625100  | 0.97213500  |
| H | -2.41633800 | 0.57089700  | 0.01649000  |
| C | -3.81586900 | 4.34713200  | -0.98550700 |
| H | -4.86663000 | 4.36467300  | -0.69266100 |
| H | -3.28375600 | 4.04699200  | 0.12842600  |
| C | -6.47913300 | 2.04721100  | -0.50803100 |
| H | -7.03553000 | 1.96085300  | -1.44639800 |
| H | -6.31019200 | 3.11962700  | -0.35230200 |
| C | -5.34977200 | -0.11655600 | -1.15946000 |
| C | -4.93170200 | -1.22979200 | -0.42215900 |
| C | -6.05140200 | -0.36010800 | -2.35485300 |
| C | -5.20663200 | -2.53032800 | -0.85361800 |
| H | -4.35433200 | -1.11631200 | 0.48744600  |
| C | -6.33386800 | -1.65358900 | -2.78686600 |
| H | -6.38724200 | 0.47138900  | -2.96917100 |
| C | -5.91310000 | -2.74990700 | -2.03251200 |
| H | -4.84139100 | -3.36920500 | -0.26857700 |
| H | -6.87709400 | -1.80243000 | -3.71643900 |

|   |              |             |             |
|---|--------------|-------------|-------------|
| H | -6.12183600  | -3.76170400 | -2.36906800 |
| C | -7.35517100  | 1.53016400  | 0.62948800  |
| C | -8.26610100  | 0.57513100  | 0.37927100  |
| H | -8.32154700  | 0.19408400  | -0.64020100 |
| C | -2.16392500  | 3.23371000  | -2.52908100 |
| H | -2.37988900  | 3.57492100  | -3.55560300 |
| H | -1.42502100  | 3.92971100  | -2.12504200 |
| H | -1.73365900  | 2.23284100  | -2.62357600 |
| C | -7.18113200  | 2.18985500  | 1.98103300  |
| H | -7.14901500  | 3.28277400  | 1.87761500  |
| H | -7.99650200  | 1.95132400  | 2.66754700  |
| H | -6.24734400  | 1.89768100  | 2.47794400  |
| C | -3.24861300  | 5.74609500  | -1.23271700 |
| H | -3.64316000  | 6.16755800  | -2.16439700 |
| H | -3.53979800  | 6.40792100  | -0.41175700 |
| H | -2.15750400  | 5.75526700  | -1.29040500 |
| C | -9.22740800  | -0.07875000 | 1.33029700  |
| H | -10.26025100 | 0.02371500  | 0.97071300  |
| H | -9.02672200  | -1.15703200 | 1.39308100  |
| H | -9.18302400  | 0.32466900  | 2.34506300  |

TS-EF-6RS-4

l imaginary frequency

H = -5393.923518

G = -5394.131375

E(M06-2X-DCM) = -5394.848336

|   |            |             |             |
|---|------------|-------------|-------------|
| O | 1.42725200 | -2.74968800 | -0.35525100 |
| O | 2.73396100 | -0.58061600 | -0.88075200 |
| P | 1.25743900 | -1.11822900 | -0.42950100 |
| O | 0.93711200 | -0.51188500 | 0.89869200  |
| C | 4.34964200 | -4.30214300 | 2.21776600  |
| C | 4.67296800 | -3.91719700 | 0.92125700  |
| C | 3.68258200 | -3.45143800 | 0.04308400  |
| C | 2.01514200 | -3.69230800 | 1.80937800  |
| C | 3.02418600 | -4.20833900 | 2.63988200  |
| C | 3.23949900 | -0.92115200 | -2.13563200 |
| C | 3.79533000 | -2.18300900 | -2.33751900 |
| C | 4.10682900 | -2.59019700 | -3.64429700 |
| C | 3.99680400 | -1.70179100 | -4.70872400 |
| C | 3.58461400 | -0.39221900 | -4.45800600 |
| C | 3.18564700 | 0.02551700  | -3.17779500 |
| H | 2.75318700 | -4.52003400 | 3.64445400  |
| H | 3.54645500 | 0.32753100  | -5.27045000 |
| C | 4.27064700 | -3.24419300 | -1.34844600 |



|   |             |             |             |
|---|-------------|-------------|-------------|
| C | 5.77472400  | -2.99841200 | -0.97588200 |
| H | 5.89805600  | -1.94627900 | -0.69421200 |
| H | 6.45060600  | -3.20067900 | -1.81240100 |
| H | 5.61852600  | -4.13736400 | -3.83674700 |
| H | 4.03913300  | -4.61693900 | -4.44713500 |
| C | 2.37740100  | -3.29556200 | 0.50708700  |
| H | 5.11513400  | -4.66874000 | 2.89707400  |
| H | 4.24528700  | -2.01152000 | -5.72081000 |
| C | 6.02954500  | -3.89477600 | 0.25329300  |
| H | 6.81585300  | -3.50277300 | 0.90842400  |
| H | 6.34247500  | -4.90528400 | -0.04592400 |
| C | 4.53821800  | -4.04197800 | -3.65854800 |
| C | 4.15574900  | -4.52375000 | -2.24011000 |
| H | 3.11478600  | -4.86644500 | -2.23151800 |
| H | 4.78231400  | -5.34465600 | -1.87673700 |
| C | 2.79217200  | 1.45116000  | -2.95053000 |
| C | 1.65684600  | 1.99624300  | -3.59890900 |
| C | 3.62232000  | 2.28263900  | -2.15485800 |
| C | 0.77072200  | 1.20951700  | -4.40335100 |
| C | 1.35406500  | 3.40280900  | -3.44865800 |
| C | 3.28520200  | 3.67783100  | -1.98498600 |
| C | -0.29510100 | 1.77484100  | -5.05256200 |
| H | 0.93697700  | 0.14169000  | -4.47048700 |
| C | 0.23230700  | 3.95405000  | -4.14502300 |
| C | 2.16247300  | 4.19913100  | -2.63377600 |
| C | -0.56268300 | 3.16874000  | -4.93667200 |
| H | -0.95693700 | 1.14908900  | -5.64406100 |
| H | 0.03548700  | 5.01894200  | -4.03932600 |
| H | 1.91954600  | 5.25201000  | -2.50682000 |
| H | -1.40329800 | 3.60237200  | -5.47312300 |
| C | 0.61602000  | -3.61266900 | 2.33346000  |
| C | 0.30697900  | -2.71976300 | 3.38800100  |
| C | -0.37196800 | -4.49724400 | 1.83670900  |
| C | 1.26098300  | -1.80014100 | 3.93499600  |
| C | -1.02448000 | -2.71443700 | 3.95095200  |
| C | -1.70449400 | -4.46583000 | 2.39430800  |
| C | 0.93815600  | -0.96945700 | 4.97763000  |
| H | 2.25336000  | -1.75475600 | 3.50216100  |
| C | -1.32165700 | -1.82804900 | 5.03434200  |
| C | -1.99358000 | -3.57760900 | 3.43344300  |
| C | -0.37068600 | -0.98463800 | 5.54102300  |
| H | 1.68181900  | -0.28027800 | 5.36853900  |
| H | -2.32652100 | -1.84560700 | 5.45099200  |
| H | -2.99550200 | -3.56730600 | 3.85864800  |

|   |             |             |             |
|---|-------------|-------------|-------------|
| H | -0.60832300 | -0.32032100 | 6.36765200  |
| C | 5.59824000  | 2.64340300  | -0.75801900 |
| H | 6.50019400  | 2.25657200  | -0.29114100 |
| C | 4.81841800  | 1.81420900  | -1.52109000 |
| H | 5.11412700  | 0.78084900  | -1.65864700 |
| C | 5.24215400  | 4.00863800  | -0.57033300 |
| H | 5.86817000  | 4.65086600  | 0.04340900  |
| C | 4.11885200  | 4.50812000  | -1.17162200 |
| H | 3.83745600  | 5.54907000  | -1.04146300 |
| C | -1.07823600 | -6.31491000 | 0.36360700  |
| H | -0.84571100 | -7.03814100 | -0.41352900 |
| C | -2.39538700 | -6.26370900 | 0.90132200  |
| H | -3.15623000 | -6.94384200 | 0.52751700  |
| C | -2.69457400 | -5.36463800 | 1.88846200  |
| H | -3.69477200 | -5.31754400 | 2.31248000  |
| C | -0.10420000 | -5.46358600 | 0.81485100  |
| H | 0.89441200  | -5.51973600 | 0.39690700  |
| N | 0.29961400  | -0.86545400 | -1.71309800 |
| S | -1.25339200 | -1.10771400 | -1.75703200 |
| O | -1.91905000 | -0.20573800 | -2.71572200 |
| O | -1.90987000 | -1.24321100 | -0.42706100 |
| C | -1.45542200 | -2.79108600 | -2.54847000 |
| F | -0.79242100 | -2.82365300 | -3.71059100 |
| F | -2.75478900 | -3.01982400 | -2.79400000 |
| F | -0.98930200 | -3.75284100 | -1.75276600 |
| C | -5.13089100 | 0.64500200  | 0.33799400  |
| C | -4.59223500 | 1.32804800  | -0.95390100 |
| H | -5.43813200 | 1.41831100  | -1.65793600 |
| H | -3.87598000 | 0.65697400  | -1.42851000 |
| C | -3.94769500 | 2.68823300  | -0.93659200 |
| C | -4.11633300 | 0.86738300  | 1.51639900  |
| H | -4.38658200 | 1.75617300  | 2.08517800  |
| H | -4.16610400 | 0.01769600  | 2.20304800  |
| N | -2.71689700 | 1.02477800  | 1.10964600  |
| C | -1.86597300 | 1.94327800  | 1.61791000  |
| N | -0.55210200 | 1.68974300  | 1.49764900  |
| C | 0.52687900  | 2.53211100  | 1.89299600  |
| C | 0.66066200  | 3.84862500  | 1.44666300  |
| C | 1.51939800  | 1.96214500  | 2.69182300  |
| C | 1.76855100  | 4.59872600  | 1.83972800  |
| C | 2.62604800  | 2.72176400  | 3.07033000  |
| H | 1.42684400  | 0.92671800  | 2.99703800  |
| C | 2.75625400  | 4.04548600  | 2.65626300  |
| H | 3.62122600  | 4.62938900  | 2.94434000  |

|   |              |              |              |
|---|--------------|--------------|--------------|
| C | 3. 65405100  | 2. 08692800  | 3. 96921200  |
| C | 1. 87225300  | 6. 03337600  | 1. 39716200  |
| F | 3. 18091100  | 1. 94450800  | 5. 23486900  |
| F | 3. 99358000  | 0. 85051400  | 3. 54733100  |
| F | 4. 78460600  | 2. 81854100  | 4. 05087600  |
| F | 1. 16537600  | 6. 86012400  | 2. 20079800  |
| F | 3. 14900400  | 6. 47697900  | 1. 40149200  |
| F | 1. 38943400  | 6. 20844900  | 0. 14215200  |
| S | -2. 45831200 | 3. 41274300  | 2. 33409000  |
| H | -0. 08213700 | 4. 28103000  | 0. 78981700  |
| H | -0. 22696700 | 0. 73974200  | 1. 22109300  |
| H | -2. 30684100 | 0. 20911700  | 0. 62614800  |
| C | -4. 31793300 | 3. 74864300  | -0. 09094600 |
| H | -5. 27989600 | 3. 63064000  | 0. 40543000  |
| H | -3. 55300900 | 3. 53562100  | 0. 92352300  |
| C | -6. 51339600 | 1. 24421200  | 0. 81318300  |
| H | -6. 35238600 | 2. 27553400  | 1. 13912300  |
| H | -6. 80769600 | 0. 69599000  | 1. 71681100  |
| C | -5. 34132700 | -0. 87217800 | 0. 09049000  |
| C | -5. 71271900 | -1. 69226800 | 1. 17153600  |
| C | -5. 25377800 | -1. 47680200 | -1. 17053700 |
| C | -5. 98293200 | -3. 04828500 | 1. 00420500  |
| H | -5. 81080500 | -1. 27178700 | 2. 16898700  |
| C | -5. 52577700 | -2. 83675300 | -1. 34372500 |
| H | -4. 96043900 | -0. 90796900 | -2. 04422800 |
| C | -5. 89296200 | -3. 63035200 | -0. 26061200 |
| H | -6. 26936300 | -3. 64744000 | 1. 86473200  |
| H | -5. 43434700 | -3. 27191400 | -2. 33424600 |
| H | -6. 10068100 | -4. 68784300 | -0. 39719200 |
| C | -7. 67335700 | 1. 22654900  | -0. 17455200 |
| C | -7. 95923000 | 2. 34433200  | -0. 86669500 |
| H | -7. 33370600 | 3. 22051600  | -0. 68529700 |
| C | -2. 86104200 | 2. 90522400  | -1. 94385800 |
| H | -3. 26679300 | 3. 49096200  | -2. 78371600 |
| H | -2. 04583400 | 3. 51194600  | -1. 53312100 |
| H | -2. 45156500 | 1. 97457100  | -2. 34000500 |
| C | -8. 48719200 | -0. 04458200 | -0. 26493600 |
| H | -8. 75004200 | -0. 39966700 | 0. 73962900  |
| H | -9. 41716400 | 0. 09695800  | -0. 82018800 |
| H | -7. 92893500 | -0. 85560100 | -0. 74371700 |
| C | -3. 99211900 | 5. 20329700  | -0. 42585700 |
| H | -4. 59681300 | 5. 55464800  | -1. 27036800 |
| H | -4. 21471700 | 5. 83904500  | 0. 43621000  |
| H | -2. 93934000 | 5. 34936300  | -0. 68056000 |

|   |             |            |             |
|---|-------------|------------|-------------|
| C | -9.05245500 | 2.57820000 | -1.87164500 |
| H | -8.63113700 | 2.88580800 | -2.83845500 |
| H | -9.67336500 | 1.69725400 | -2.04957800 |
| H | -9.71110400 | 3.39518700 | -1.54665900 |

TS-EF-GRS-5

1 imaginary frequency

H = -5393.924561

G = -5394.131030

E(M06-2X-DCM) = -5394.847787

|   |            |             |             |
|---|------------|-------------|-------------|
| O | 1.45722700 | -2.76256100 | -0.04995100 |
| O | 2.87943900 | -0.64317900 | -0.46748000 |
| P | 1.33427200 | -1.13765600 | -0.26571100 |
| O | 0.77685900 | -0.43468300 | 0.92851500  |
| C | 3.83395300 | -4.15796100 | 3.10825100  |
| C | 4.39501500 | -3.86070600 | 1.87113700  |
| C | 3.59007800 | -3.44829100 | 0.79838900  |
| C | 1.62391400 | -3.56459400 | 2.24009600  |
| C | 2.45582300 | -4.03007000 | 3.27284700  |
| C | 3.59970500 | -1.06774300 | -1.58401900 |
| C | 4.16136900 | -2.34276000 | -1.59834200 |
| C | 4.70065800 | -2.83783200 | -2.79593100 |
| C | 4.80351300 | -2.02146100 | -3.91728500 |
| C | 4.37306500 | -0.69651200 | -3.83241300 |
| C | 3.75182300 | -0.19274400 | -2.67786100 |
| H | 2.00075400 | -4.27407000 | 4.22838200  |
| H | 4.49570200 | -0.03279300 | -4.68330600 |
| C | 4.42724700 | -3.33769700 | -0.47187700 |
| C | 5.84156900 | -3.07577700 | 0.15462700  |
| H | 5.92922800 | -2.00797700 | 0.38619600  |
| H | 6.65555100 | -3.33642600 | -0.52870200 |
| H | 6.19406000 | -4.40317800 | -2.60523600 |
| H | 4.74554400 | -4.91338600 | -3.46456800 |
| C | 2.22435100 | -3.25443700 | 1.00398400  |
| H | 4.45597500 | -4.48314000 | 3.93839400  |
| H | 5.22882300 | -2.39879700 | -4.84396400 |
| C | 5.85109400 | -3.89023800 | 1.46421000  |
| H | 6.51075300 | -3.46040600 | 2.22660400  |
| H | 6.19540800 | -4.92014200 | 1.29299300  |
| C | 5.10132400 | -4.28975300 | -2.63629300 |
| C | 4.45571000 | -4.67343700 | -1.28471500 |
| H | 3.42507100 | -5.00908300 | -1.44678300 |
| H | 4.98991600 | -5.47177600 | -0.75953600 |
| C | 3.33853100 | 1.24421000  | -2.62133800 |

|   |              |              |              |
|---|--------------|--------------|--------------|
| C | 2. 34764700  | 1. 74264200  | -3. 50259200 |
| C | 4. 01243900  | 2. 12760000  | -1. 73878700 |
| C | 1. 62013200  | 0. 90353200  | -4. 40702300 |
| C | 2. 03225600  | 3. 15439500  | -3. 49883400 |
| C | 3. 65985700  | 3. 52916500  | -1. 72189600 |
| C | 0. 69560100  | 1. 42207100  | -5. 27486300 |
| H | 1. 78907900  | -0. 16553300 | -4. 37656800 |
| C | 1. 06161200  | 3. 65584600  | -4. 42273300 |
| C | 2. 68125000  | 4. 00381600  | -2. 59951200 |
| C | 0. 42013800  | 2. 81897400  | -5. 29650600 |
| H | 0. 14979600  | 0. 75775200  | -5. 93837800 |
| H | 0. 85627800  | 4. 72439200  | -4. 42153100 |
| H | 2. 42578600  | 5. 06119000  | -2. 58509200 |
| H | -0. 30459600 | 3. 21425600  | -6. 00434700 |
| C | 0. 15455900  | -3. 45256700 | 2. 50313000  |
| C | -0. 32097500 | -2. 50727400 | 3. 44466300  |
| C | -0. 74250400 | -4. 36761500 | 1. 89971100  |
| C | 0. 53183900  | -1. 54651800 | 4. 08061400  |
| C | -1. 72362300 | -2. 48965000 | 3. 79398400  |
| C | -2. 14460700 | -4. 32926400 | 2. 24813700  |
| C | 0. 04634100  | -0. 66613900 | 5. 01369100  |
| H | 1. 57822500  | -1. 50823100 | 3. 80221700  |
| C | -2. 19019700 | -1. 55225600 | 4. 76905500  |
| C | -2. 59602400 | -3. 39497000 | 3. 18419300  |
| C | -1. 33335500 | -0. 67055600 | 5. 36951700  |
| H | 0. 71581200  | 0. 05460500  | 5. 47462300  |
| H | -3. 24742000 | -1. 56105200 | 5. 02513200  |
| H | -3. 64967100 | -3. 38366800 | 3. 45758500  |
| H | -1. 69957200 | 0. 03351500  | 6. 11193200  |
| C | 5. 69573400  | 2. 58350300  | -0. 02293000 |
| H | 6. 49194400  | 2. 23056100  | 0. 62717300  |
| C | 5. 06589100  | 1. 70490800  | -0. 86514500 |
| H | 5. 37435400  | 0. 66623100  | -0. 88065400 |
| C | 5. 32076200  | 3. 95618600  | 0. 01001500  |
| H | 5. 82606300  | 4. 63806300  | 0. 68881300  |
| C | 4. 33306400  | 4. 41223700  | -0. 82028600 |
| H | 4. 03990100  | 5. 45806400  | -0. 80974900 |
| C | -1. 20612400 | -6. 25786700 | 0. 41974200  |
| H | -0. 85440100 | -7. 00823200 | -0. 28307200 |
| C | -2. 58783600 | -6. 20977300 | 0. 75985100  |
| H | -3. 27663900 | -6. 92524900 | 0. 31836000  |
| C | -3. 03896700 | -5. 27275800 | 1. 65076700  |
| H | -4. 08878500 | -5. 23593000 | 1. 93388700  |
| C | -0. 31816800 | -5. 37294000 | 0. 97265900  |

|   |             |             |             |
|---|-------------|-------------|-------------|
| H | 0.73153200  | -5.43083300 | 0.70910600  |
| N | 0.64079200  | -0.98061100 | -1.72504900 |
| S | -0.89662600 | -1.15621400 | -2.00104200 |
| O | -1.37289500 | -0.27033300 | -3.07853700 |
| O | -1.74554100 | -1.20448600 | -0.77550300 |
| C | -1.06455100 | -2.86845700 | -2.73285500 |
| F | -0.30820300 | -2.96506700 | -3.83280100 |
| F | -2.34138600 | -3.09055100 | -3.06730400 |
| F | -0.67715600 | -3.79640500 | -1.85529200 |
| C | -5.20318700 | 0.79776000  | -0.90184700 |
| C | -4.46538800 | 1.48850900  | -2.11893600 |
| H | -5.22807600 | 1.68506800  | -2.88978000 |
| H | -3.78368700 | 0.75346700  | -2.55251700 |
| C | -3.70014700 | 2.77850400  | -1.96780100 |
| C | -4.40744100 | 1.01594300  | 0.41767200  |
| H | -4.75160500 | 1.92976500  | 0.89668100  |
| H | -4.63391100 | 0.20838400  | 1.11997500  |
| N | -2.95121400 | 1.12984000  | 0.27909900  |
| C | -2.19144600 | 2.03473900  | 0.93831700  |
| N | -0.88250300 | 1.75433600  | 1.07421700  |
| C | 0.11944500  | 2.61366600  | 1.61369900  |
| C | 0.35581400  | 3.89336100  | 1.10759400  |
| C | 0.93467700  | 2.10165400  | 2.62376600  |
| C | 1.38242500  | 4.66863300  | 1.64519800  |
| C | 1.96566500  | 2.88389600  | 3.14450600  |
| H | 0.77084100  | 1.09188700  | 2.97947700  |
| C | 2.19273300  | 4.17315000  | 2.66784300  |
| H | 2.99986800  | 4.77338200  | 3.06831300  |
| C | 2.80109400  | 2.31796500  | 4.26230000  |
| C | 1.58586100  | 6.06773800  | 1.13025500  |
| F | 2.11451700  | 2.30687000  | 5.43491700  |
| F | 3.16422600  | 1.04014800  | 4.02090800  |
| F | 3.92634400  | 3.03199300  | 4.47225000  |
| F | 0.74227000  | 6.94709400  | 1.71739100  |
| F | 2.84068100  | 6.51680600  | 1.35412500  |
| F | 1.36047800  | 6.15002000  | -0.20456000 |
| S | -2.87160800 | 3.52240900  | 1.52365400  |
| H | -0.24499500 | 4.27732800  | 0.29380900  |
| H | -0.52684500 | 0.79346500  | 0.90258600  |
| H | -2.46448600 | 0.29941700  | -0.09878600 |
| C | -4.17125500 | 3.89036600  | -1.24376100 |
| H | -5.22934100 | 3.84863700  | -0.98373700 |
| H | -3.66351100 | 3.66635100  | -0.09417000 |
| C | -6.63151400 | 1.42675500  | -0.68418600 |

|   |             |             |             |
|---|-------------|-------------|-------------|
| H | -7.22678400 | 1.22356800  | -1.58289000 |
| H | -6.52115000 | 2.51345700  | -0.63140200 |
| C | -5.35594300 | -0.68632200 | -1.30914200 |
| C | -4.75976400 | -1.74679500 | -0.61532300 |
| C | -6.11036900 | -1.00482100 | -2.45338400 |
| C | -4.92126800 | -3.06990400 | -1.03571900 |
| H | -4.13241000 | -1.56926700 | 0.24919400  |
| C | -6.27863600 | -2.32202800 | -2.87379400 |
| H | -6.57759100 | -0.21537000 | -3.03625000 |
| C | -5.68603500 | -3.36536700 | -2.16110500 |
| H | -4.42454900 | -3.86298500 | -0.48446600 |
| H | -6.86952800 | -2.53038300 | -3.76192400 |
| H | -5.80824200 | -4.39401000 | -2.48896400 |
| C | -7.41574200 | 0.98386100  | 0.54354400  |
| C | -7.55322700 | 1.84175400  | 1.57016700  |
| H | -7.07789600 | 2.81978200  | 1.47300900  |
| C | -2.40213300 | 2.85249600  | -2.70285500 |
| H | -2.61432900 | 3.18341100  | -3.73355800 |
| H | -1.71629100 | 3.59284800  | -2.28334000 |
| H | -1.90684300 | 1.88143500  | -2.78395500 |
| C | -8.05009400 | -0.38745000 | 0.50168500  |
| H | -7.30173400 | -1.18649300 | 0.54410000  |
| H | -8.75468800 | -0.54333400 | 1.32169200  |
| H | -8.59480900 | -0.53039800 | -0.44019200 |
| C | -3.68906000 | 5.31431300  | -1.52398400 |
| H | -4.07229500 | 5.67349100  | -2.48610600 |
| H | -4.05658800 | 5.98510600  | -0.74182100 |
| H | -2.59951700 | 5.39581700  | -1.54092800 |
| C | -8.28368100 | 1.64855900  | 2.86892500  |
| H | -7.59374900 | 1.75334100  | 3.71727700  |
| H | -9.05499400 | 2.41972400  | 2.99954200  |
| H | -8.76714600 | 0.67249900  | 2.95495600  |

TS-EF-6RS-6

l imaginary frequency

H = -5393.921928

G = -5394.129142

E(M06-2X-DCM) = -5394.846655

|   |            |             |             |
|---|------------|-------------|-------------|
| O | 1.18704100 | -2.85051300 | -0.14442100 |
| O | 2.80129300 | -0.87097000 | -0.55224200 |
| P | 1.22171400 | -1.21482500 | -0.30669700 |
| O | 0.77933800 | -0.49942500 | 0.92760100  |
| C | 3.51911700 | -4.57555700 | 2.88174400  |
| C | 4.06475600 | -4.29444000 | 1.63401600  |

|   |              |              |              |
|---|--------------|--------------|--------------|
| C | 3. 26869700  | -3. 77068100 | 0. 60409800  |
| C | 1. 34998600  | -3. 74266500 | 2. 11240000  |
| C | 2. 16647100  | -4. 32021900 | 3. 09996900  |
| C | 3. 43486900  | -1. 32826700 | -1. 70760400 |
| C | 3. 86511600  | -2. 65140100 | -1. 77977000 |
| C | 4. 31016200  | -3. 15890100 | -3. 01036700 |
| C | 4. 45474200  | -2. 32124300 | -4. 11122700 |
| C | 4. 16194100  | -0. 96369400 | -3. 97246800 |
| C | 3. 63497200  | -0. 43808000 | -2. 78129700 |
| H | 1. 72168800  | -4. 55058400 | 4. 06368700  |
| H | 4. 32053600  | -0. 28845600 | -4. 80820700 |
| C | 4. 06894900  | -3. 70284800 | -0. 69263800 |
| C | 5. 52290700  | -3. 60150800 | -0. 11223700 |
| H | 5. 72465300  | -2. 55535700 | 0. 14540900  |
| H | 6. 28302200  | -3. 91969500 | -0. 83227700 |
| H | 5. 64595000  | -4. 86884100 | -2. 92014000 |
| H | 4. 12498800  | -5. 20654300 | -3. 73841200 |
| C | 1. 93644100  | -3. 45088200 | 0. 86522500  |
| H | 4. 13360400  | -4. 98658700 | 3. 67877300  |
| H | 4. 80773900  | -2. 70880600 | -5. 06369500 |
| C | 5. 49614400  | -4. 45353400 | 1. 17302800  |
| H | 6. 22056200  | -4. 11436000 | 1. 92225500  |
| H | 5. 73088800  | -5. 50635100 | 0. 96075800  |
| C | 4. 56950500  | -4. 64752500 | -2. 90688000 |
| C | 3. 93612400  | -5. 00843900 | -1. 54332600 |
| H | 2. 87214500  | -5. 23546700 | -1. 67592500 |
| H | 4. 40596400  | -5. 87179000 | -1. 06123400 |
| C | 3. 37030200  | 1. 03015300  | -2. 66867900 |
| C | 2. 40831400  | 1. 65330800  | -3. 50127700 |
| C | 4. 15725200  | 1. 81302200  | -1. 78468900 |
| C | 1. 57090100  | 0. 92056100  | -4. 40316500 |
| C | 2. 23936600  | 3. 08895000  | -3. 44795600 |
| C | 3. 94874200  | 3. 24154100  | -1. 71542100 |
| C | 0. 67921700  | 1. 55690700  | -5. 22585600 |
| H | 1. 62927500  | -0. 16064900 | -4. 40676200 |
| C | 1. 29865700  | 3. 71472800  | -4. 32581000 |
| C | 2. 99791000  | 3. 83986200  | -2. 54670000 |
| C | 0. 54901400  | 2. 97472900  | -5. 20092900 |
| H | 0. 04839000  | 0. 97225600  | -5. 88901900 |
| H | 1. 20460100  | 4. 79812700  | -4. 28882900 |
| H | 2. 85220500  | 4. 91667100  | -2. 49435500 |
| H | -0. 15130300 | 3. 46342100  | -5. 87421400 |
| C | -0. 09242200 | -3. 50254700 | 2. 43335700  |
| C | -0. 44362900 | -2. 54989200 | 3. 42086700  |



|   |             |             |             |
|---|-------------|-------------|-------------|
| C | -1.09162000 | -4.31273600 | 1.84046000  |
| C | 0.51694300  | -1.69088300 | 4.04871100  |
| C | -1.82417300 | -2.41906300 | 3.82926200  |
| C | -2.46932600 | -4.16346900 | 2.25081800  |
| C | 0.14992100  | -0.80217800 | 5.02692600  |
| H | 1.55065000  | -1.73686100 | 3.72748300  |
| C | -2.16556300 | -1.47640300 | 4.85004000  |
| C | -2.79758500 | -3.22413500 | 3.23200800  |
| C | -1.20959900 | -0.69513500 | 5.43980800  |
| H | 0.89930900  | -0.16018300 | 5.48109400  |
| H | -3.20840600 | -1.39951100 | 5.15000800  |
| H | -3.83406900 | -3.12977800 | 3.55118600  |
| H | -1.48121900 | 0.01369500  | 6.21750600  |
| C | 5.92998100  | 2.04301900  | -0.11437500 |
| H | 6.70642400  | 1.59158500  | 0.49758000  |
| C | 5.18956500  | 1.25944600  | -0.96036000 |
| H | 5.39189700  | 0.19642000  | -1.01718200 |
| C | 5.69553700  | 3.44425000  | -0.02783000 |
| H | 6.28680300  | 4.04981600  | 0.65389400  |
| C | 4.73401500  | 4.02324100  | -0.81082200 |
| H | 4.54737800  | 5.09199700  | -0.75921700 |
| C | -1.78208500 | -6.10329000 | 0.32527800  |
| H | -1.52777100 | -6.85642300 | -0.41555500 |
| C | -3.13842600 | -5.94806700 | 0.72920700  |
| H | -3.90545600 | -6.58599200 | 0.29798100  |
| C | -3.46728300 | -5.00620700 | 1.66717800  |
| H | -4.49674900 | -4.88899800 | 1.99916300  |
| C | -0.79702800 | -5.31837700 | 0.86471800  |
| H | 0.23141900  | -5.45825200 | 0.55270300  |
| N | 0.49879900  | -0.93957000 | -1.73393600 |
| S | -1.05698600 | -0.95328400 | -1.95762400 |
| O | -1.47939100 | 0.02176500  | -2.97996500 |
| O | -1.86489400 | -0.97201900 | -0.70406900 |
| C | -1.41530900 | -2.60755400 | -2.75094000 |
| F | -0.70069000 | -2.73221700 | -3.87600700 |
| F | -2.71571500 | -2.68717500 | -3.05574700 |
| F | -1.10002400 | -3.60509900 | -1.92227400 |
| C | -5.08478900 | 1.34673900  | -0.73535900 |
| C | -4.31126800 | 2.01362100  | -1.94352800 |
| H | -5.06457800 | 2.30025600  | -2.69518800 |
| H | -3.69712800 | 1.24175300  | -2.41251100 |
| C | -3.44671800 | 3.23353300  | -1.76574700 |
| C | -4.26061100 | 1.48781400  | 0.57468300  |
| H | -4.49247400 | 2.44081000  | 1.04372100  |

|   |             |             |             |
|---|-------------|-------------|-------------|
| H | -4.56691500 | 0.71326900  | 1.28423200  |
| N | -2.80308200 | 1.44098100  | 0.42121200  |
| C | -1.94116300 | 2.24718400  | 1.08282700  |
| N | -0.66492200 | 1.83172300  | 1.18011500  |
| C | 0.43105100  | 2.57143300  | 1.71423700  |
| C | 0.78241100  | 3.83450900  | 1.23360500  |
| C | 1.21505600  | 1.95324400  | 2.68896200  |
| C | 1.89442600  | 4.48859700  | 1.76230100  |
| C | 2.33207400  | 2.61413700  | 3.20053100  |
| H | 0.95945200  | 0.95545500  | 3.02374400  |
| C | 2.67571600  | 3.88683300  | 2.74991800  |
| H | 3.54874600  | 4.39229300  | 3.14293800  |
| C | 3.13452900  | 1.93750900  | 4.28031900  |
| C | 2.22535500  | 5.87401000  | 1.27730700  |
| F | 2.48050700  | 1.96303900  | 5.47112400  |
| F | 3.36135400  | 0.63678400  | 3.99767600  |
| F | 4.33086400  | 2.52966100  | 4.47598400  |
| F | 1.49357400  | 6.81739300  | 1.91305000  |
| F | 3.52556000  | 6.18653000  | 1.47332700  |
| F | 1.97183900  | 6.01725600  | -0.04723600 |
| S | -2.45298500 | 3.77838800  | 1.72484800  |
| H | 0.20361000  | 4.29838000  | 0.44594400  |
| H | -0.41126200 | 0.84624900  | 0.97213400  |
| H | -2.41634300 | 0.57089700  | 0.01648600  |
| C | -3.81587500 | 4.34712900  | -0.98551100 |
| H | -4.86663600 | 4.36466600  | -0.69266600 |
| H | -3.28376500 | 4.04699000  | 0.12841800  |
| C | -6.47913900 | 2.04720100  | -0.50804500 |
| H | -7.03553900 | 1.96082800  | -1.44640900 |
| H | -6.31020500 | 3.11962000  | -0.35233100 |
| C | -5.34976800 | -0.11656100 | -1.15947000 |
| C | -4.93169900 | -1.22979600 | -0.42216500 |
| C | -6.05139200 | -0.36011800 | -2.35486600 |
| C | -5.20662500 | -2.53033300 | -0.85362200 |
| H | -4.35433300 | -1.11631200 | 0.48744300  |
| C | -6.33385200 | -1.65360100 | -2.78687800 |
| H | -6.38723200 | 0.47137800  | -2.96918700 |
| C | -5.91308600 | -2.74991500 | -2.03251900 |
| H | -4.84138400 | -3.36920800 | -0.26857800 |
| H | -6.87707400 | -1.80244400 | -3.71645300 |
| H | -6.12181800 | -3.76171400 | -2.36907400 |
| C | -7.35516700 | 1.53016100  | 0.62948500  |
| C | -8.26607100 | 0.57509700  | 0.37929300  |
| H | -8.32150500 | 0.19402000  | -0.64016900 |

|   |              |             |             |
|---|--------------|-------------|-------------|
| C | -2.16393400  | 3.23371000  | -2.52909500 |
| H | -2.37991400  | 3.57487300  | -3.55562900 |
| H | -1.42504200  | 3.92974300  | -2.12508900 |
| H | -1.73364900  | 2.23284600  | -2.62355700 |
| C | -7.18114800  | 2.18989600  | 1.98101100  |
| H | -7.14907900  | 3.28281300  | 1.87756300  |
| H | -7.99650300  | 1.95134900  | 2.66753800  |
| H | -6.24734400  | 1.89777500  | 2.47792300  |
| C | -3.24862500  | 5.74609500  | -1.23272100 |
| H | -3.64316900  | 6.16755400  | -2.16440300 |
| H | -3.53981800  | 6.40792000  | -0.41176200 |
| H | -2.15751500  | 5.75527300  | -1.29040100 |
| C | -9.22736200  | -0.07878300 | 1.33033600  |
| H | -9.02664900  | -1.15705900 | 1.39314900  |
| H | -9.18299100  | 0.32466400  | 2.34509000  |
| H | -10.26020700 | 0.02364500  | 0.97074700  |

TS-EF-6RS-7

l imaginary frequency

H = -5393.923518

G = -5394.131374

E(M06-2X-DCM) = -5394.848337

|   |            |             |             |
|---|------------|-------------|-------------|
| O | 1.42720900 | -2.74971100 | -0.35525200 |
| O | 2.73394700 | -0.58065500 | -0.88074700 |
| P | 1.25741600 | -1.11825100 | -0.42950500 |
| O | 0.93708700 | -0.51190200 | 0.89868600  |
| C | 4.34958400 | -4.30221600 | 2.21775100  |
| C | 4.67291000 | -3.91727600 | 0.92124100  |
| C | 3.68252900 | -3.45149800 | 0.04307400  |
| C | 2.01509400 | -3.69233600 | 1.80937800  |
| C | 3.02413300 | -4.20838700 | 2.63987500  |
| C | 3.23948200 | -0.92119300 | -2.13562700 |
| C | 3.79528900 | -2.18306000 | -2.33752300 |
| C | 4.10677600 | -2.59024600 | -3.64430500 |
| C | 3.99676600 | -1.70183100 | -4.70872600 |
| C | 3.58460500 | -0.39225100 | -4.45799800 |
| C | 3.18565100 | 0.02548400  | -3.17778300 |
| H | 2.75313400 | -4.52007500 | 3.64445000  |
| H | 3.54646000 | 0.32750400  | -5.27043800 |
| C | 4.27058900 | -3.24425900 | -1.34845800 |
| C | 5.77467300 | -2.99850700 | -0.97590200 |
| H | 5.89802700 | -1.94637800 | -0.69422900 |
| H | 6.45054700 | -3.20078400 | -1.81242500 |
| H | 5.61844200 | -4.13744300 | -3.83676900 |

|   |              |              |              |
|---|--------------|--------------|--------------|
| H | 4. 03903700  | -4. 61698200 | -4. 44715400 |
| C | 2. 37735200  | -3. 29559900 | 0. 50708400  |
| H | 5. 11507300  | -4. 66882900 | 2. 89705500  |
| H | 4. 24523900  | -2. 01155900 | -5. 72081500 |
| C | 6. 02948400  | -3. 89487900 | 0. 25326900  |
| H | 6. 81580300  | -3. 50289300 | 0. 90839700  |
| H | 6. 34239300  | -4. 90539300 | -0. 04595200 |
| C | 4. 53813600  | -4. 04203600 | -3. 65856600 |
| C | 4. 15566300  | -4. 52380800 | -2. 24012800 |
| H | 3. 11469300  | -4. 86648300 | -2. 23153400 |
| H | 4. 78221400  | -5. 34472800 | -1. 87676300 |
| C | 2. 79221100  | 1. 45113500  | -2. 95050300 |
| C | 1. 65689600  | 1. 99625300  | -3. 59886900 |
| C | 3. 62238500  | 2. 28258400  | -2. 15482700 |
| C | 0. 77074800  | 1. 20955800  | -4. 40331500 |
| C | 1. 35414900  | 3. 40282400  | -3. 44859900 |
| C | 3. 28530300  | 3. 67778300  | -1. 98493700 |
| C | -0. 29506500 | 1. 77491600  | -5. 05251400 |
| H | 0. 93697600  | 0. 14172700  | -4. 47046400 |
| C | 0. 23240200  | 3. 95410100  | -4. 14495200 |
| C | 2. 16258200  | 4. 19911700  | -2. 63371300 |
| C | -0. 56261200 | 3. 16882000  | -4. 93660700 |
| H | -0. 95691900 | 1. 14918600  | -5. 64401700 |
| H | 0. 03560700  | 5. 01899700  | -4. 03924100 |
| H | 1. 91968000  | 5. 25200000  | -2. 50674100 |
| H | -1. 40321900 | 3. 60247900  | -5. 47304900 |
| C | 0. 61597800  | -3. 61266900 | 2. 33347000  |
| C | 0. 30696200  | -2. 71975200 | 3. 38801100  |
| C | -0. 37203200 | -4. 49722500 | 1. 83672900  |
| C | 1. 26098900  | -1. 80014800 | 3. 93499600  |
| C | -1. 02449300 | -2. 71439800 | 3. 95097100  |
| C | -1. 70455400 | -4. 46578200 | 2. 39433800  |
| C | 0. 93818600  | -0. 96945400 | 4. 97762900  |
| H | 2. 25336300  | -1. 75478400 | 3. 50215300  |
| C | -1. 32164400 | -1. 82800100 | 5. 03436100  |
| C | -1. 99361400 | -3. 57755100 | 3. 43347200  |
| C | -0. 37065200 | -0. 98460700 | 5. 54103200  |
| H | 1. 68186600  | -0. 28028900 | 5. 36853000  |
| H | -2. 32650500 | -1. 84553700 | 5. 45101800  |
| H | -2. 99553300 | -3. 56722600 | 3. 85868200  |
| H | -0. 60827000 | -0. 32028300 | 6. 36766000  |
| C | 5. 59832500  | 2. 64328400  | -0. 75800000 |
| H | 6. 50027400  | 2. 25642600  | -0. 29113400 |
| C | 4. 81847700  | 1. 81411800  | -1. 52107400 |

|   |             |             |             |
|---|-------------|-------------|-------------|
| H | 5.11416000  | 0.78075300  | -1.65864500 |
| C | 5.24227500  | 4.00852600  | -0.57029700 |
| H | 5.86831300  | 4.65073200  | 0.04344500  |
| C | 4.11898000  | 4.50804200  | -1.17157100 |
| H | 3.83761200  | 5.54899800  | -1.04139900 |
| C | -1.07834700 | -6.31488400 | 0.36364000  |
| H | -0.84584200 | -7.03812300 | -0.41349400 |
| C | -2.39549300 | -6.26365300 | 0.90136300  |
| H | -3.15635300 | -6.94377200 | 0.52756600  |
| C | -2.69465600 | -5.36457100 | 1.88850100  |
| H | -3.69485000 | -5.31745400 | 2.31252500  |
| C | -0.10429100 | -5.46357700 | 0.81487400  |
| H | 0.89431800  | -5.51975000 | 0.39692400  |
| N | 0.29960100  | -0.86546800 | -1.71310900 |
| S | -1.25340700 | -1.10771100 | -1.75705000 |
| O | -1.91904900 | -0.20573600 | -2.71575100 |
| O | -1.90989500 | -1.24319200 | -0.42708200 |
| C | -1.45545200 | -2.79108800 | -2.54847500 |
| F | -0.79244500 | -2.82367200 | -3.71059300 |
| F | -2.75482100 | -3.01981100 | -2.79401100 |
| F | -0.98934900 | -3.75284200 | -1.75276100 |
| C | -5.13088500 | 0.64504600  | 0.33798500  |
| C | -4.59222100 | 1.32807800  | -0.95391300 |
| H | -5.43811500 | 1.41834100  | -1.65795200 |
| H | -3.87596900 | 0.65699600  | -1.42851500 |
| C | -3.94767200 | 2.68825900  | -0.93661400 |
| C | -4.11632300 | 0.86741600  | 1.51638800  |
| H | -4.38656500 | 1.75620500  | 2.08517200  |
| H | -4.16609700 | 0.01772500  | 2.20303200  |
| N | -2.71688600 | 1.02480200  | 1.10963400  |
| C | -1.86595700 | 1.94330100  | 1.61789000  |
| N | -0.55208700 | 1.68975400  | 1.49763300  |
| C | 0.52690000  | 2.53211500  | 1.89297700  |
| C | 0.66069700  | 3.84862500  | 1.44663800  |
| C | 1.51941300  | 1.96214300  | 2.69180700  |
| C | 1.76859100  | 4.59871800  | 1.83970400  |
| C | 2.62606800  | 2.72175400  | 3.07031600  |
| H | 1.42685000  | 0.92671800  | 2.99702500  |
| C | 2.75628600  | 4.04547400  | 2.65624500  |
| H | 3.62126200  | 4.62937100  | 2.94432200  |
| C | 3.65406000  | 2.08691700  | 3.96920900  |
| C | 1.87230600  | 6.03336500  | 1.39712800  |
| F | 3.18093400  | 1.94456600  | 5.23487900  |
| F | 3.99353900  | 0.85047300  | 3.54737400  |

|   |              |              |              |
|---|--------------|--------------|--------------|
| F | 4. 78464300  | 2. 81849300  | 4. 05082700  |
| F | 1. 16542900  | 6. 86012400  | 2. 20075100  |
| F | 3. 14906100  | 6. 47695900  | 1. 40146600  |
| F | 1. 38950000  | 6. 20843200  | 0. 14211200  |
| S | -2. 45828600 | 3. 41277600  | 2. 33405900  |
| H | -0. 08209700 | 4. 28103400  | 0. 78978800  |
| H | -0. 22696100 | 0. 73974600  | 1. 22108800  |
| H | -2. 30683600 | 0. 20913800  | 0. 62613800  |
| C | -4. 31790400 | 3. 74868000  | -0. 09097900 |
| H | -5. 27987100 | 3. 63069400  | 0. 40539400  |
| H | -3. 55298700 | 3. 53565100  | 0. 92349100  |
| C | -6. 51338100 | 1. 24427700  | 0. 81317200  |
| H | -6. 35235800 | 2. 27559800  | 1. 13910600  |
| H | -6. 80768700 | 0. 69606400  | 1. 71680400  |
| C | -5. 34134200 | -0. 87213200 | 0. 09048800  |
| C | -5. 71274800 | -1. 69221100 | 1. 17153700  |
| C | -5. 25379600 | -1. 47676400 | -1. 17053600 |
| C | -5. 98297800 | -3. 04822600 | 1. 00421200  |
| H | -5. 81083100 | -1. 27172400 | 2. 16898500  |
| C | -5. 52581200 | -2. 83671300 | -1. 34371800 |
| H | -4. 96044600 | -0. 90794100 | -2. 04422900 |
| C | -5. 89301100 | -3. 63030100 | -0. 26060100 |
| H | -6. 26942000 | -3. 64737300 | 1. 86474200  |
| H | -5. 43438300 | -3. 27188100 | -2. 33423500 |
| H | -6. 10074300 | -4. 68779000 | -0. 39717600 |
| C | -7. 67334500 | 1. 22662200  | -0. 17456000 |
| C | -7. 95920600 | 2. 34440400  | -0. 86670900 |
| H | -7. 33367200 | 3. 22058300  | -0. 68531700 |
| C | -2. 86100300 | 2. 90523600  | -1. 94386800 |
| H | -3. 26669300 | 3. 49108700  | -2. 78367500 |
| H | -2. 04574200 | 3. 51184800  | -1. 53307100 |
| H | -2. 45160000 | 1. 97458000  | -2. 34008200 |
| C | -8. 48719500 | -0. 04450000 | -0. 26493600 |
| H | -8. 75004800 | -0. 39957500 | 0. 73963200  |
| H | -9. 41716600 | 0. 09704800  | -0. 82018800 |
| H | -7. 92894900 | -0. 85552900 | -0. 74371300 |
| C | -3. 99206300 | 5. 20332500  | -0. 42589800 |
| H | -4. 59676300 | 5. 55468800  | -1. 27040000 |
| H | -4. 21463100 | 5. 83908100  | 0. 43617100  |
| H | -2. 93928400 | 5. 34936400  | -0. 68061900 |
| C | -9. 05243200 | 2. 57827900  | -1. 87165800 |
| H | -8. 63111300 | 2. 88588900  | -2. 83846700 |
| H | -9. 67334500 | 1. 69733600  | -2. 04959400 |
| H | -9. 71107700 | 3. 39526800  | -1. 54666900 |

TS-EF-6RS-8

l imaginary frequency

H = -5393.921136

G = -5394.127565

E(M06-2X-DCM) = -5394.848462

|   |            |             |             |
|---|------------|-------------|-------------|
| O | 1.24941300 | -2.82741600 | -0.32272200 |
| O | 2.67960400 | -0.74761800 | -0.88604500 |
| P | 1.17516600 | -1.19051200 | -0.42371400 |
| O | 0.89521800 | -0.54452800 | 0.89481700  |
| C | 4.08481100 | -4.51398600 | 2.26315400  |
| C | 4.42495300 | -4.16839800 | 0.95988000  |
| C | 3.46061700 | -3.65656400 | 0.07827800  |
| C | 1.78990800 | -3.76925700 | 1.85441000  |
| C | 2.76954500 | -4.33332100 | 2.68884600  |
| C | 3.16107000 | -1.13539200 | -2.13653400 |
| C | 3.64028000 | -2.43091700 | -2.32116400 |
| C | 3.92348400 | -2.87446000 | -3.62253900 |
| C | 3.86450700 | -1.99613700 | -4.69931600 |
| C | 3.53177600 | -0.66090300 | -4.46672900 |
| C | 3.16092600 | -0.20206300 | -3.19210100 |
| H | 2.48490600 | -4.61257100 | 3.69917000  |
| H | 3.53479700 | 0.04822300  | -5.28933700 |
| C | 4.05456900 | -3.50456400 | -1.31798100 |
| C | 5.57204400 | -3.34376800 | -0.95326300 |
| H | 5.75866300 | -2.29716100 | -0.68618300 |
| H | 6.23157000 | -3.59702400 | -1.78895200 |
| H | 5.33870700 | -4.51245200 | -3.79645700 |
| H | 3.73134600 | -4.90449200 | -4.39609400 |
| C | 2.16935900 | -3.41528900 | 0.54465500  |
| H | 4.82982900 | -4.91620500 | 2.94506100  |
| H | 4.09183600 | -2.33441200 | -5.70722700 |
| C | 5.77757600 | -4.23720200 | 0.28709500  |
| H | 6.58892900 | -3.88475000 | 0.93409800  |
| H | 6.02750300 | -5.26870900 | 0.00050000  |
| C | 4.26672200 | -4.34962400 | -3.61696900 |
| C | 3.86045400 | -4.78744300 | -2.19091700 |
| H | 2.80089000 | -5.06703700 | -2.17499000 |
| H | 4.43785200 | -5.63919600 | -1.81725800 |
| C | 2.85183500 | 1.24739900  | -2.98557400 |
| C | 1.75123600 | 1.84893100  | -3.64413100 |
| C | 3.72867000 | 2.04046900  | -2.20079500 |
| C | 0.82088100 | 1.10401800  | -4.43841000 |
| C | 1.53214900 | 3.27316400  | -3.51606100 |

|   |             |             |             |
|---|-------------|-------------|-------------|
| C | 3.47402500  | 3.45548600  | -2.05218600 |
| C | -0.20798900 | 1.72163500  | -5.09953500 |
| H | 0.92318800  | 0.02727500  | -4.48851200 |
| C | 0.44678100  | 3.87940900  | -4.22439200 |
| C | 2.38496500  | 4.03244300  | -2.71114800 |
| C | -0.39189700 | 3.13070500  | -5.00642500 |
| H | -0.90473600 | 1.12723800  | -5.68324300 |
| H | 0.31395000  | 4.95575000  | -4.13612100 |
| H | 2.20508800  | 5.09990300  | -2.60103000 |
| H | -1.20363400 | 3.60534900  | -5.55256300 |
| C | 0.40123700  | -3.59419500 | 2.38301300  |
| C | 0.15448500  | -2.66727900 | 3.42457400  |
| C | -0.64328700 | -4.42146300 | 1.90358400  |
| C | 1.16766800  | -1.80246900 | 3.95425300  |
| C | -1.17152100 | -2.56797700 | 3.99161000  |
| C | -1.96891200 | -4.29557400 | 2.46430700  |
| C | 0.90310000  | -0.93701400 | 4.98493700  |
| H | 2.15926700  | -1.82746400 | 3.51794900  |
| C | -1.40679900 | -1.64788100 | 5.06202200  |
| C | -2.19617000 | -3.37475700 | 3.49035300  |
| C | -0.40165700 | -0.85955400 | 5.55259300  |
| H | 1.69112900  | -0.29117600 | 5.36271600  |
| H | -2.40901800 | -1.59446900 | 5.48196800  |
| H | -3.19365400 | -3.29355500 | 3.91836700  |
| H | -0.59286200 | -0.16868700 | 6.36943600  |
| C | 5.72112000  | 2.30555300  | -0.80598600 |
| H | 6.59843900  | 1.87348200  | -0.33191300 |
| C | 4.89472800  | 1.51223200  | -1.55813900 |
| H | 5.12953100  | 0.46142500  | -1.67996800 |
| C | 5.44545400  | 3.69191900  | -0.63890100 |
| H | 6.10696400  | 4.30540300  | -0.03307600 |
| C | 4.35404200  | 4.24742300  | -1.24962200 |
| H | 4.13388800  | 5.30481900  | -1.13518200 |
| C | -1.47046700 | -6.21270800 | 0.46150800  |
| H | -1.28784400 | -6.96159700 | -0.30457700 |
| C | -2.77976500 | -6.06779700 | 1.00131600  |
| H | -3.58438600 | -6.70267400 | 0.63981800  |
| C | -3.01680400 | -5.13608700 | 1.97497800  |
| H | -4.01046200 | -5.01769100 | 2.40047200  |
| C | -0.44192900 | -5.41910600 | 0.89672000  |
| H | 0.54955600  | -5.54613600 | 0.47731700  |
| N | 0.23069000  | -0.90464000 | -1.71030800 |
| S | -1.33555800 | -1.04076200 | -1.74451200 |
| O | -1.94078000 | -0.11760200 | -2.72299100 |



|   |             |             |             |
|---|-------------|-------------|-------------|
| O | -1.99448900 | -1.09784600 | -0.41010700 |
| C | -1.65936200 | -2.72454300 | -2.49283000 |
| F | -1.01366500 | -2.82927200 | -3.66048800 |
| F | -2.97369400 | -2.87047400 | -2.71870800 |
| F | -1.24900000 | -3.69588400 | -1.67822200 |
| C | -5.05855000 | 1.00026800  | 0.34005700  |
| C | -4.45391500 | 1.59946500  | -0.96284900 |
| H | -5.26540500 | 1.69135400  | -1.70462100 |
| H | -3.76153900 | 0.87161100  | -1.38867800 |
| C | -3.74137900 | 2.92295500  | -0.97839300 |
| C | -4.02615000 | 1.16271900  | 1.51481700  |
| H | -4.24003700 | 2.06668100  | 2.08381400  |
| H | -4.12054300 | 0.31803100  | 2.20242800  |
| N | -2.62175900 | 1.23789700  | 1.10139000  |
| C | -1.71640900 | 2.10953800  | 1.60144900  |
| N | -0.42116200 | 1.77119200  | 1.48013600  |
| C | 0.71219800  | 2.54307800  | 1.86476200  |
| C | 0.92734600  | 3.84799400  | 1.41576000  |
| C | 1.67351400  | 1.91008800  | 2.65454800  |
| C | 2.08686900  | 4.52333100  | 1.79522900  |
| C | 2.83114900  | 2.59580500  | 3.02114400  |
| H | 1.51647500  | 0.88319100  | 2.96212600  |
| C | 3.04428000  | 3.90739900  | 2.60288900  |
| H | 3.94903200  | 4.43319100  | 2.88061200  |
| C | 3.82332900  | 1.89723500  | 3.91290900  |
| C | 2.28328700  | 5.94600600  | 1.34548900  |
| F | 3.36088000  | 1.80491000  | 5.18714600  |
| F | 4.06467200  | 0.63432900  | 3.50192800  |
| F | 5.00575100  | 2.54455700  | 3.96885700  |
| F | 1.65265100  | 6.82333900  | 2.15867700  |
| F | 3.58842700  | 6.29750000  | 1.32398900  |
| F | 1.79086800  | 6.15134500  | 0.09877800  |
| S | -2.21727500 | 3.61748900  | 2.30122600  |
| H | 0.20740200  | 4.32824500  | 0.76681600  |
| H | -0.16140600 | 0.79887200  | 1.21297900  |
| H | -2.26100400 | 0.39252700  | 0.63034900  |
| C | -4.05471700 | 4.01812100  | -0.14763000 |
| H | -5.02918400 | 3.96162600  | 0.33532300  |
| H | -3.32051900 | 3.78323600  | 0.85757200  |
| C | -6.39996900 | 1.69755300  | 0.80211600  |
| H | -6.17055800 | 2.69196400  | 1.20089300  |
| H | -6.77106600 | 1.12494500  | 1.65823300  |
| C | -5.39028200 | -0.49912400 | 0.11405600  |
| C | -5.79356400 | -1.28330900 | 1.21026400  |

|   |              |             |             |
|---|--------------|-------------|-------------|
| C | -5.38623300  | -1.11494500 | -1.14373500 |
| C | -6.16628600  | -2.61719800 | 1.06071600  |
| H | -5.83607900  | -0.85111900 | 2.20678400  |
| C | -5.75735400  | -2.45323000 | -1.29939400 |
| H | -5.07738400  | -0.57371200 | -2.02951500 |
| C | -6.14996400  | -3.21254800 | -0.20137000 |
| H | -6.47232100  | -3.18870300 | 1.93324600  |
| H | -5.72570200  | -2.89861700 | -2.28925500 |
| H | -6.43542700  | -4.25355700 | -0.32381200 |
| C | -7.51257200  | 1.82679300  | -0.23325800 |
| C | -8.36187000  | 0.80683900  | -0.44105200 |
| H | -8.21000800  | -0.09495000 | 0.15078900  |
| C | -2.64283700  | 3.06289400  | -1.98451500 |
| H | -2.98499200  | 3.71591700  | -2.80212400 |
| H | -1.77249700  | 3.57288900  | -1.55328500 |
| H | -2.32302100  | 2.10918900  | -2.40690600 |
| C | -7.62153200  | 3.16819900  | -0.92468700 |
| H | -6.70953700  | 3.42965000  | -1.47727100 |
| H | -8.45192300  | 3.21334500  | -1.63226300 |
| H | -7.77521700  | 3.96901900  | -0.18722800 |
| C | -3.65101900  | 5.44529600  | -0.51687600 |
| H | -4.23404400  | 5.80808400  | -1.37163200 |
| H | -3.84127100  | 6.11205800  | 0.32919500  |
| H | -2.59095700  | 5.52739000  | -0.77013700 |
| C | -9.51537300  | 0.72126300  | -1.39959400 |
| H | -9.37842700  | -0.12574400 | -2.08515800 |
| H | -10.45352100 | 0.53366600  | -0.85964600 |
| H | -9.65331500  | 1.62068800  | -2.00502000 |

TS-EF-6RR

l imaginary frequency

H = -5393.928158

G = -5394.134238

E(M06-2X-DCM) = -5394.852596

|   |            |             |             |
|---|------------|-------------|-------------|
| O | 2.13010800 | -2.42466200 | -0.42177600 |
| O | 2.86600600 | 0.02659400  | -0.79236300 |
| P | 1.54745000 | -0.89134900 | -0.48904700 |
| O | 0.95627800 | -0.43403400 | 0.80389500  |
| C | 5.02607600 | -3.26313300 | 2.49369000  |
| C | 5.38924200 | -2.72880800 | 1.26258700  |
| C | 4.42826700 | -2.51082900 | 0.26325700  |
| C | 2.68700800 | -3.30887200 | 1.77487000  |
| C | 3.68720300 | -3.57297100 | 2.72615200  |
| C | 3.58304400 | -0.13595500 | -1.97754600 |

|   |             |             |             |
|---|-------------|-------------|-------------|
| C | 4.49446800  | -1.18487100 | -2.08994800 |
| C | 5.07631700  | -1.45607300 | -3.33819100 |
| C | 4.85903900  | -0.61005700 | -4.42008700 |
| C | 4.05686800  | 0.51725300  | -4.24572500 |
| C | 3.38891100  | 0.77453400  | -3.03605300 |
| H | 3.39067300  | -4.01143900 | 3.67447300  |
| H | 3.91807300  | 1.21279700  | -5.06796500 |
| C | 5.11358900  | -2.09603000 | -1.03395800 |
| C | 6.42299400  | -1.45240800 | -0.45919300 |
| H | 6.20449900  | -0.42052100 | -0.16087700 |
| H | 7.23189700  | -1.42215100 | -1.19559700 |
| H | 6.97763400  | -2.50331600 | -3.30519100 |
| H | 5.69734600  | -3.39499000 | -4.11932400 |
| C | 3.08317000  | -2.74446800 | 0.54634600  |
| H | 5.77045900  | -3.43955800 | 3.26604700  |
| H | 5.31802000  | -0.80988000 | -5.38515700 |
| C | 6.75819500  | -2.29256000 | 0.79033200  |
| H | 7.30341900  | -1.72218300 | 1.55097600  |
| H | 7.38610400  | -3.15790500 | 0.53476200  |
| C | 5.90135600  | -2.72399400 | -3.27690000 |
| C | 5.48536200  | -3.33174700 | -1.91858300 |
| H | 4.59213700  | -3.95365000 | -2.04742300 |
| H | 6.26332300  | -3.95309800 | -1.46372500 |
| C | 2.56250500  | 2.01531700  | -2.91229400 |
| C | 1.45788800  | 2.22167100  | -3.77705500 |
| C | 2.95382400  | 3.03568800  | -2.00701100 |
| C | 0.98463600  | 1.22091000  | -4.68619600 |
| C | 0.75781600  | 3.48701400  | -3.75492400 |
| C | 2.20614500  | 4.27206500  | -1.95580200 |
| C | -0.05188600 | 1.46945700  | -5.54712500 |
| H | 1.44257400  | 0.23994300  | -4.66537600 |
| C | -0.31176000 | 3.71074200  | -4.67888500 |
| C | 1.13955400  | 4.46859300  | -2.83702000 |
| C | -0.69990700 | 2.73695800  | -5.55983200 |
| H | -0.39633400 | 0.68519900  | -6.21499200 |
| H | -0.80331300 | 4.68159300  | -4.66944200 |
| H | 0.60442200  | 5.41646900  | -2.81749000 |
| H | -1.50837400 | 2.92185500  | -6.26282200 |
| C | 1.27219600  | -3.66655100 | 2.10302900  |
| C | 0.60342500  | -2.99697500 | 3.15671700  |
| C | 0.64423000  | -4.74525200 | 1.43283600  |
| C | 1.18104100  | -1.89665400 | 3.87126700  |
| C | -0.72067100 | -3.42505100 | 3.54776100  |
| C | -0.68877600 | -5.14739700 | 1.81948000  |

|   |             |             |             |
|---|-------------|-------------|-------------|
| C | 0.52047600  | -1.29258300 | 4.91053900  |
| H | 2.15650000  | -1.53058500 | 3.57358600  |
| C | -1.37757000 | -2.76415900 | 4.63362200  |
| C | -1.33122200 | -4.48125800 | 2.86678300  |
| C | -0.77618800 | -1.73340500 | 5.30303600  |
| H | 0.98556300  | -0.46094300 | 5.43239100  |
| H | -2.37031500 | -3.10655500 | 4.91751800  |
| H | -2.32692600 | -4.80158500 | 3.16737300  |
| H | -1.28384700 | -1.24327200 | 6.12954200  |
| C | 4.43369400  | 3.92133800  | -0.27208900 |
| H | 5.30207600  | 3.80188900  | 0.37037600  |
| C | 4.09162900  | 2.92156900  | -1.14453500 |
| H | 4.69662400  | 2.02408800  | -1.19058600 |
| C | 3.66429200  | 5.11638000  | -0.19480100 |
| H | 3.93364900  | 5.88992400  | 0.51813700  |
| C | 2.58645800  | 5.28520400  | -1.02084700 |
| H | 1.99156800  | 6.19343000  | -0.97572500 |
| C | 0.65602900  | -6.54042300 | -0.22636100 |
| H | 1.16901000  | -7.09062000 | -1.01067300 |
| C | -0.66675000 | -6.91602800 | 0.14214100  |
| H | -1.15301500 | -7.74465500 | -0.36570600 |
| C | -1.31462600 | -6.23886400 | 1.13944300  |
| H | -2.32028300 | -6.52303300 | 1.44068500  |
| C | 1.28731600  | -5.49644500 | 0.39734000  |
| H | 2.29717000  | -5.22998700 | 0.10757600  |
| N | 0.68285500  | -0.85540900 | -1.86267600 |
| S | -0.81557100 | -1.29340900 | -2.01313300 |
| O | -1.53304700 | -0.47780500 | -3.00967900 |
| O | -1.54220200 | -1.53382900 | -0.73090900 |
| C | -0.76456100 | -2.99703800 | -2.77700900 |
| F | -0.21517700 | -2.94280800 | -3.99462600 |
| F | -2.01871900 | -3.46349400 | -2.88978600 |
| F | -0.05888900 | -3.83195200 | -2.01440600 |
| C | -5.08344800 | -0.10390200 | -0.56332600 |
| C | -4.40321300 | 0.72735800  | -1.69130500 |
| H | -5.02571300 | 0.68659500  | -2.60082400 |
| H | -3.47995800 | 0.22558300  | -1.99294900 |
| C | -4.09286000 | 2.17860000  | -1.50889900 |
| C | -4.32373400 | 0.13734900  | 0.78457900  |
| H | -4.79404900 | 0.93978100  | 1.34739600  |
| H | -4.39155700 | -0.76514700 | 1.39970300  |
| N | -2.91144100 | 0.50508400  | 0.65388900  |
| C | -2.31009500 | 1.50440300  | 1.33815400  |
| N | -0.96442500 | 1.45844600  | 1.40517900  |

|   |              |             |             |
|---|--------------|-------------|-------------|
| C | -0.09337500  | 2.39467700  | 2.03128100  |
| C | -0.13846900  | 3.76828700  | 1.77592000  |
| C | 0.89315600   | 1.87572500  | 2.87193600  |
| C | 0.77987200   | 4.61350100  | 2.39681100  |
| C | 1.81045500   | 2.73306500  | 3.47953800  |
| H | 0.94533300   | 0.80574100  | 3.03179200  |
| C | 1.75719200   | 4.10651500  | 3.25535300  |
| H | 2.47568800   | 4.76884200  | 3.72254300  |
| C | 2.82951700   | 2.14604700  | 4.41966400  |
| C | 0.69428100   | 6.09892300  | 2.16966200  |
| F | 2.26926000   | 1.81479200  | 5.61232700  |
| F | 3.37637100   | 1.01413300  | 3.92580800  |
| F | 3.83572200   | 3.00528300  | 4.68388100  |
| F | 1.91279800   | 6.68625200  | 2.20660600  |
| F | 0.13751300   | 6.39943800  | 0.97260600  |
| F | -0.05893300  | 6.70768600  | 3.11371800  |
| S | -3.22764300  | 2.79939200  | 2.03784600  |
| H | -0.87233300  | 4.17437300  | 1.09402000  |
| H | -0.46343300  | 0.60114400  | 1.10169300  |
| H | -2.30286100  | -0.20472000 | 0.21708500  |
| C | -4.80926200  | 3.02677900  | -0.63714400 |
| H | -5.77931400  | 2.63040100  | -0.32891500 |
| H | -4.16779400  | 2.86062800  | 0.42068300  |
| C | -4.95656700  | -1.60672600 | -1.04775000 |
| H | -3.91697400  | -1.77362500 | -1.34355800 |
| H | -5.55832400  | -1.68745100 | -1.96074900 |
| C | -6.58275000  | 0.22199700  | -0.38896700 |
| C | -7.20400000  | 0.23661200  | 0.87085300  |
| C | -7.40736900  | 0.43013800  | -1.50891700 |
| C | -8.57308900  | 0.47834300  | 1.00754800  |
| H | -6.62993400  | 0.04342400  | 1.76982100  |
| C | -8.77474700  | 0.67079400  | -1.37838900 |
| H | -6.98993000  | 0.39469200  | -2.51119500 |
| C | -9.36686900  | 0.70228600  | -0.11520800 |
| H | -9.01553600  | 0.48424900  | 2.00010200  |
| H | -9.37658500  | 0.83205000  | -2.26890900 |
| H | -10.43141800 | 0.89180800  | -0.01009200 |
| C | -5.35867400  | -2.70792700 | -0.07385200 |
| C | -6.65077400  | -3.04587300 | 0.07481100  |
| H | -7.38338500  | -2.49365100 | -0.51357500 |
| C | -2.94660200  | 2.71213000  | -2.30538600 |
| H | -2.25609800  | 3.27129000  | -1.65886300 |
| H | -2.38672400  | 1.92968400  | -2.81988600 |
| H | -3.31143000  | 3.44053300  | -3.04362600 |

|   |             |             |             |
|---|-------------|-------------|-------------|
| C | -4.20652600 | -3.42596800 | 0.59267500  |
| H | -3.57211700 | -3.90635000 | -0.16378900 |
| H | -3.54005200 | -2.74298200 | 1.13285700  |
| H | -4.53469700 | -4.19567500 | 1.29517600  |
| C | -4.78606400 | 4.54497200  | -0.80834400 |
| H | -5.35239400 | 4.84614500  | -1.69744000 |
| H | -5.24639100 | 5.02122800  | 0.06199400  |
| H | -3.76957200 | 4.93688500  | -0.90159500 |
| C | -7.24763500 | -4.11184600 | 0.95029300  |
| H | -8.00250200 | -3.68103000 | 1.62225100  |
| H | -7.76800700 | -4.86678000 | 0.34448200  |
| H | -6.51035800 | -4.63191100 | 1.56695900  |

TS-EF-6RR-1

l imaginary frequency

H = -5393.928142

G = -5394.135446

E(M06-2X-DCM) = -5394.852340

|   |            |             |             |
|---|------------|-------------|-------------|
| O | 2.02142700 | -2.50973200 | -0.38062400 |
| O | 2.88957900 | -0.10346300 | -0.76038100 |
| P | 1.52197000 | -0.94823600 | -0.46374000 |
| O | 0.94529500 | -0.45385400 | 0.82270300  |
| C | 4.84486100 | -3.47096100 | 2.56791600  |
| C | 5.24596100 | -2.97055900 | 1.33432100  |
| C | 4.30586400 | -2.71146900 | 0.32503200  |
| C | 2.51208700 | -3.39622400 | 1.83107000  |
| C | 3.48927500 | -3.70387500 | 2.79316700  |
| C | 3.60475000 | -0.31333300 | -1.93968400 |
| C | 4.46013000 | -1.40976200 | -2.03726400 |
| C | 5.03502800 | -1.72161400 | -3.27923400 |
| C | 4.86913400 | -0.87463200 | -4.36944300 |
| C | 4.12521200 | 0.29417500  | -4.21013300 |
| C | 3.46391800 | 0.59624300  | -3.00726700 |
| H | 3.16208700 | -4.11397400 | 3.74409500  |
| H | 4.02717300 | 0.98838600  | -5.03935000 |
| C | 5.02216000 | -2.34448000 | -0.96994300 |
| C | 6.35967500 | -1.76697200 | -0.38973400 |
| H | 6.19420500 | -0.72249200 | -0.10129800 |
| H | 7.17463100 | -1.78599400 | -1.11980800 |
| H | 6.87808200 | -2.86749200 | -3.22346400 |
| H | 5.55855500 | -3.69674600 | -4.04099800 |
| C | 2.94803000 | -2.86970400 | 0.59928300  |
| H | 5.57265900 | -3.67927400 | 3.34810000  |
| H | 5.32308100 | -1.10649300 | -5.32971900 |

|   |              |              |              |
|---|--------------|--------------|--------------|
| C | 6. 63996600  | -2. 61330500 | 0. 86909300  |
| H | 7. 20997200  | -2. 06691800 | 1. 62916900  |
| H | 7. 22163800  | -3. 51365500 | 0. 62520200  |
| C | 5. 79146900  | -3. 03083100 | -3. 20205600 |
| C | 5. 33376100  | -3. 60502200 | -1. 84255100 |
| H | 4. 40949900  | -4. 17924900 | -1. 97375300 |
| H | 6. 07404600  | -4. 26350400 | -1. 37714700 |
| C | 2. 69907100  | 1. 87728700  | -2. 89924900 |
| C | 1. 60760000  | 2. 12815600  | -3. 76881200 |
| C | 3. 13698100  | 2. 88589800  | -2. 00230600 |
| C | 1. 09080700  | 1. 14387400  | -4. 67223400 |
| C | 0. 96665600  | 3. 42457400  | -3. 75735800 |
| C | 2. 44898800  | 4. 15685700  | -1. 96374300 |
| C | 0. 06807900  | 1. 43365500  | -5. 53667500 |
| H | 1. 50275400  | 0. 14289500  | -4. 64377400 |
| C | -0. 09146500 | 3. 68998300  | -4. 68341900 |
| C | 1. 39308400  | 4. 39510600  | -2. 84749500 |
| C | -0. 52233300 | 2. 72888300  | -5. 55834600 |
| H | -0. 31069400 | 0. 66139200  | -6. 19992600 |
| H | -0. 53893300 | 4. 68192600  | -4. 68066500 |
| H | 0. 90204300  | 5. 36665500  | -2. 83604600 |
| H | -1. 32108900 | 2. 94528900  | -6. 26344600 |
| C | 1. 07731700  | -3. 66963400 | 2. 15378900  |
| C | 0. 44172300  | -2. 95098800 | 3. 19576100  |
| C | 0. 39317600  | -4. 71911000 | 1. 49228800  |
| C | 1. 07500700  | -1. 87362800 | 3. 89823300  |
| C | -0. 90532500 | -3. 30116500 | 3. 58576300  |
| C | -0. 96087900 | -5. 04399500 | 1. 87868100  |
| C | 0. 44359800  | -1. 22005200 | 4. 92562300  |
| H | 2. 06986300  | -1. 56459900 | 3. 60002000  |
| C | -1. 52972900 | -2. 59122100 | 4. 65970000  |
| C | -1. 56981300 | -4. 33119800 | 2. 91527600  |
| C | -0. 87649800 | -1. 58508700 | 5. 31792700  |
| H | 0. 95021200  | -0. 40689900 | 5. 43796300  |
| H | -2. 54046600 | -2. 87607800 | 4. 94385500  |
| H | -2. 58221100 | -4. 59398500 | 3. 21614700  |
| H | -1. 36029500 | -1. 05707500 | 6. 13537400  |
| C | 4. 65485400  | 3. 71573800  | -0. 27260800 |
| H | 5. 51544000  | 3. 56080200  | 0. 37278300  |
| C | 4. 26641800  | 2. 72525100  | -1. 13622900 |
| H | 4. 82750900  | 1. 79918500  | -1. 17248400 |
| C | 3. 94366400  | 4. 94705000  | -0. 20828100 |
| H | 4. 24930700  | 5. 71389400  | 0. 49729100  |
| C | 2. 87626500  | 5. 15949500  | -1. 03781400 |

|   |             |             |             |
|---|-------------|-------------|-------------|
| H | 2.32540700  | 6.09547000  | -1.00225600 |
| C | 0.31171500  | -6.52983000 | -0.14780000 |
| H | 0.79572200  | -7.11476500 | -0.92533900 |
| C | -1.02968900 | -6.83069100 | 0.22209700  |
| H | -1.55855200 | -7.63768100 | -0.27792300 |
| C | -1.64241200 | -6.10852200 | 1.20973600  |
| H | -2.66267500 | -6.33483600 | 1.51119300  |
| C | 0.99689500  | -5.51451000 | 0.46618800  |
| H | 2.01997900  | -5.30550900 | 0.17583000  |
| N | 0.67182000  | -0.87031800 | -1.84277500 |
| S | -0.83423100 | -1.26914400 | -2.02354500 |
| O | -1.51746300 | -0.41438500 | -3.01107300 |
| O | -1.58484800 | -1.51563000 | -0.75523900 |
| C | -0.80173200 | -2.95151300 | -2.83354300 |
| F | -0.17585000 | -2.87958200 | -4.01338200 |
| F | -2.06038100 | -3.36615600 | -3.03716900 |
| F | -0.17230400 | -3.83399000 | -2.05730600 |
| C | -5.06954700 | 0.04862800  | -0.55580500 |
| C | -4.37728000 | 0.83336600  | -1.70808100 |
| H | -5.01033700 | 0.79176000  | -2.60972500 |
| H | -3.47375800 | 0.29475200  | -2.00601300 |
| C | -4.01881300 | 2.27883200  | -1.55669300 |
| C | -4.27568900 | 0.28638800  | 0.77523900  |
| H | -4.72137900 | 1.10103500  | 1.34122200  |
| H | -4.33627600 | -0.60821700 | 1.40021500  |
| N | -2.85783300 | 0.62440400  | 0.61441900  |
| C | -2.22576900 | 1.61557500  | 1.28286200  |
| N | -0.88420400 | 1.52768800  | 1.36064500  |
| C | 0.01207500  | 2.44445500  | 1.98024400  |
| C | 0.02242100  | 3.81295400  | 1.69572600  |
| C | 0.96495200  | 1.90633100  | 2.84705900  |
| C | 0.96267300  | 4.63574600  | 2.31386400  |
| C | 1.90456700  | 2.74113600  | 3.45189300  |
| H | 0.97373500  | 0.83870400  | 3.02989400  |
| C | 1.90677200  | 4.11043000  | 3.19841700  |
| H | 2.64268200  | 4.75502300  | 3.66341200  |
| C | 2.88539400  | 2.13536300  | 4.42044000  |
| C | 0.93910500  | 6.11834400  | 2.05504800  |
| F | 2.29332100  | 1.84890700  | 5.60928300  |
| F | 3.39669500  | 0.97413100  | 3.95778000  |
| F | 3.91872900  | 2.96148800  | 4.68516300  |
| F | 0.21301700  | 6.77792900  | 2.98612200  |
| F | 2.18132300  | 6.65452900  | 2.07980400  |
| F | 0.39498800  | 6.41639300  | 0.85177900  |



|   |              |             |             |
|---|--------------|-------------|-------------|
| S | -3.10472100  | 2.95438600  | 1.95106200  |
| H | -0.68483700  | 4.23134900  | 0.99337500  |
| H | -0.40958400  | 0.64641700  | 1.08106000  |
| H | -2.27224600  | -0.11408000 | 0.19493900  |
| C | -4.70194700  | 3.16323900  | -0.69911900 |
| H | -5.67677200  | 2.80082600  | -0.36597700 |
| H | -4.04587300  | 2.99959200  | 0.36602200  |
| C | -5.00649200  | -1.46570700 | -1.01621600 |
| H | -3.95982700  | -1.70518500 | -1.23036700 |
| H | -5.54350800  | -1.51366100 | -1.97081400 |
| C | -6.55395100  | 0.42026900  | -0.36011500 |
| C | -7.16013700  | 0.40113600  | 0.90709200  |
| C | -7.38426500  | 0.69807100  | -1.45984800 |
| C | -8.51882800  | 0.67833300  | 1.07187000  |
| H | -6.57943700  | 0.15733800  | 1.78994900  |
| C | -8.74240000  | 0.97449300  | -1.30142600 |
| H | -6.97960800  | 0.69577300  | -2.46775100 |
| C | -9.31836600  | 0.97208500  | -0.03089200 |
| H | -8.94921900  | 0.65793300  | 2.06954300  |
| H | -9.34915800  | 1.19141400  | -2.17669700 |
| H | -10.37514800 | 1.18996400  | 0.09566900  |
| C | -5.57138600  | -2.52263600 | -0.08095900 |
| C | -6.84246200  | -2.93150300 | -0.22579900 |
| H | -7.43961400  | -2.46371100 | -1.00906100 |
| C | -2.86381100  | 2.76165400  | -2.37442900 |
| H | -2.16803700  | 3.34514800  | -1.75656100 |
| H | -2.31310300  | 1.94925500  | -2.85112900 |
| H | -3.22194700  | 3.45570300  | -3.14869500 |
| C | -4.62603000  | -3.12304200 | 0.94608000  |
| H | -3.58021100  | -2.96471100 | 0.66564100  |
| H | -4.76346400  | -2.69561400 | 1.94984500  |
| H | -4.77411300  | -4.20355400 | 1.04593800  |
| C | -4.63564600  | 4.67682300  | -0.89305900 |
| H | -5.20968100  | 4.98158600  | -1.77604200 |
| H | -5.06494300  | 5.18040100  | -0.02211100 |
| H | -3.61005900  | 5.03667200  | -1.01215100 |
| C | -7.56929700  | -3.96668800 | 0.58413200  |
| H | -8.41796000  | -3.51461400 | 1.11654000  |
| H | -7.99015900  | -4.74860000 | -0.06262800 |
| H | -6.93254100  | -4.45095300 | 1.32940700  |

TS-EF-6RR-2

l imaginary frequency

H = -5393.917506

G = -5394.125310

E(M06-2X-DCM) = -5394.846719

|   |             |             |             |
|---|-------------|-------------|-------------|
| O | -2.27348700 | -1.60313800 | -1.04130500 |
| O | -1.71862000 | -1.76233900 | 1.49767100  |
| P | -1.24316100 | -1.04803100 | 0.10194400  |
| O | -1.32941300 | 0.43241500  | 0.32703600  |
| C | -6.44493700 | -1.49235600 | -0.64653000 |
| C | -5.69563400 | -2.46675100 | 0.00244600  |
| C | -4.30546100 | -2.54497600 | -0.17787300 |
| C | -4.39522500 | -0.58560300 | -1.63511100 |
| C | -5.79396000 | -0.58805200 | -1.48106600 |
| C | -1.51777500 | -3.13656100 | 1.65476600  |
| C | -2.38946700 | -4.03136600 | 1.03932400  |
| C | -2.06048100 | -5.39596400 | 1.00702100  |
| C | -0.95583500 | -5.87436500 | 1.70198800  |
| C | -0.18280900 | -4.97835400 | 2.44010300  |
| C | -0.43001900 | -3.59551600 | 2.42234300  |
| H | -6.37149400 | 0.15078400  | -2.02813500 |
| H | 0.65532700  | -5.34305000 | 3.02635400  |
| C | -3.78177100 | -3.83529500 | 0.44910800  |
| C | -4.86533800 | -4.06090600 | 1.55983600  |
| H | -4.60644200 | -3.44692800 | 2.43033500  |
| H | -4.91322600 | -5.10252300 | 1.89054000  |
| H | -3.71242600 | -6.78396500 | 0.75250600  |
| H | -2.54070600 | -6.83121200 | -0.56030200 |
| C | -3.65935000 | -1.56222300 | -0.93076400 |
| H | -7.52363400 | -1.44313000 | -0.52121100 |
| H | -0.70142700 | -6.93108900 | 1.68585000  |
| C | -6.17971100 | -3.55157600 | 0.93732900  |
| H | -6.88772100 | -3.17650300 | 1.68533800  |
| H | -6.69786000 | -4.34812400 | 0.38501000  |
| C | -3.04321300 | -6.15917300 | 0.14469400  |
| C | -3.81578700 | -5.02552800 | -0.56654000 |
| H | -3.27570000 | -4.72667200 | -1.47137900 |
| H | -4.83429000 | -5.30453700 | -0.85437400 |
| C | 0.42726700  | -2.69757600 | 3.25729700  |
| C | 1.81354100  | -2.58831900 | 2.98682100  |
| C | -0.12700800 | -2.06173100 | 4.39786300  |
| C | 2.42563600  | -3.17656800 | 1.83232700  |
| C | 2.66368800  | -1.85022600 | 3.89499100  |
| C | 0.72988400  | -1.29655800 | 5.27588200  |
| C | 3.77603300  | -3.08396700 | 1.61913000  |
| H | 1.80052100  | -3.67561600 | 1.10321800  |
| C | 4.07035200  | -1.78940800 | 3.64099400  |

|   |             |             |             |
|---|-------------|-------------|-------------|
| C | 2.09885200  | -1.21812300 | 5.00530500  |
| C | 4.61679100  | -2.39897000 | 2.54318100  |
| H | 4.20654600  | -3.52042300 | 0.72298500  |
| H | 4.69760900  | -1.24861600 | 4.34634700  |
| H | 2.74267100  | -0.66161500 | 5.68388900  |
| H | 5.68472300  | -2.34176700 | 2.35598600  |
| C | -3.80195300 | 0.41219800  | -2.58036900 |
| C | -4.02308000 | 1.79743100  | -2.36028200 |
| C | -3.15637200 | -0.02122400 | -3.76733700 |
| C | -4.64481700 | 2.30983600  | -1.17442400 |
| C | -3.62193700 | 2.75716200  | -3.36562900 |
| C | -2.72060200 | 0.95427000  | -4.74228500 |
| C | -4.90450500 | 3.64778500  | -1.01866600 |
| H | -4.91013500 | 1.61803600  | -0.38393100 |
| C | -3.90733100 | 4.14525500  | -3.16401400 |
| C | -2.97591200 | 2.31104200  | -4.52262300 |
| C | -4.54352600 | 4.58199400  | -2.03195100 |
| H | -5.38796600 | 4.00098300  | -0.11181700 |
| H | -3.61897600 | 4.84692800  | -3.94382100 |
| H | -2.68333000 | 3.03515600  | -5.28118200 |
| H | -4.77470600 | 5.63623200  | -1.90237300 |
| C | -2.01088400 | -1.55134400 | 5.87324800  |
| H | -3.06416100 | -1.65525800 | 6.12024000  |
| C | -1.50947700 | -2.16911000 | 4.75716500  |
| H | -2.16770800 | -2.76259800 | 4.13342400  |
| C | -1.16571600 | -0.77918000 | 6.72018600  |
| H | -1.57995300 | -0.29790100 | 7.60219600  |
| C | 0.16587600  | -0.66064500 | 6.42638900  |
| H | 0.82765700  | -0.08676800 | 7.07120100  |
| C | -2.31137000 | -1.78531800 | -5.23139800 |
| H | -2.14795900 | -2.84095600 | -5.42805200 |
| C | -1.85810800 | -0.81859200 | -6.17165800 |
| H | -1.35372700 | -1.14318200 | -7.07750300 |
| C | -2.06550200 | 0.51224800  | -5.93376800 |
| H | -1.73843500 | 1.26278800  | -6.64959500 |
| C | -2.94342500 | -1.40135500 | -4.07890800 |
| H | -3.28429100 | -2.15679000 | -3.38345700 |
| N | 0.20214800  | -1.66736800 | -0.26998700 |
| S | 0.83023900  | -1.94882100 | -1.70657500 |
| O | 2.27473100  | -2.16703700 | -1.53662400 |
| O | 0.38750100  | -1.03051900 | -2.77156300 |
| C | 0.21760400  | -3.65014500 | -2.21662000 |
| F | 0.37954000  | -4.51843900 | -1.20866800 |
| F | 0.92976300  | -4.06976600 | -3.26694700 |

|   |             |             |             |
|---|-------------|-------------|-------------|
| F | -1.07909700 | -3.64090700 | -2.56230600 |
| C | -0.84215800 | 3.90005100  | 1.03617200  |
| C | -0.97138300 | 3.57613100  | -0.48606200 |
| H | -1.79457100 | 4.16644100  | -0.91614100 |
| H | -1.30406200 | 2.53956800  | -0.58333900 |
| C | 0.18660600  | 3.77875800  | -1.41812600 |
| C | 0.45649300  | 3.23138000  | 1.59783700  |
| H | 1.27849400  | 3.94219700  | 1.60586000  |
| H | 0.28816900  | 2.92735800  | 2.63475800  |
| N | 0.93905500  | 2.06836100  | 0.84551800  |
| C | 2.21781400  | 1.89225200  | 0.46058700  |
| N | 2.60083700  | 0.65833600  | 0.06856000  |
| C | 3.88642900  | 0.37952700  | -0.50928700 |
| C | 4.00308700  | 0.21726800  | -1.88895800 |
| C | 5.00396100  | 0.26460300  | 0.31466600  |
| C | 5.25620100  | -0.04176000 | -2.44478900 |
| C | 6.25276400  | 0.00482200  | -0.25190900 |
| H | 4.89645100  | 0.37932300  | 1.38618000  |
| C | 6.38502500  | -0.14433300 | -1.63216800 |
| H | 7.35878300  | -0.32748200 | -2.07126100 |
| C | 7.45603300  | -0.16554800 | 0.63595400  |
| C | 5.38703400  | -0.25273800 | -3.93108900 |
| F | 7.62545400  | -1.46208200 | 1.00531500  |
| F | 8.59537900  | 0.21080900  | 0.01749400  |
| F | 7.35000400  | 0.55146400  | 1.77443800  |
| F | 4.44881500  | 0.43530200  | -4.61772000 |
| F | 6.59759800  | 0.15093700  | -4.38298700 |
| F | 5.25555700  | -1.55213000 | -4.26807100 |
| S | 3.33731200  | 3.21621600  | 0.37672000  |
| H | 3.12463600  | 0.28583800  | -2.51854300 |
| H | 1.94445500  | -0.12602500 | 0.13829300  |
| H | 0.26313200  | 1.29523600  | 0.72814100  |
| C | 1.17242500  | 4.76495800  | -1.21546100 |
| H | 0.88882400  | 5.52751700  | -0.48729600 |
| H | 1.99619700  | 4.10893900  | -0.51943900 |
| C | 0.22767500  | 2.84709900  | -2.58233200 |
| H | -0.69676700 | 2.97230600  | -3.16623100 |
| H | 1.07897200  | 3.00600500  | -3.24437400 |
| H | 0.20745800  | 1.79912100  | -2.25597700 |
| C | -0.83138800 | 5.41505400  | 1.33557500  |
| C | -1.68561900 | 6.28940800  | 0.63949500  |
| C | -0.05163900 | 5.97001200  | 2.36379800  |
| C | -1.73499900 | 7.65192700  | 0.93268700  |
| H | -2.33719100 | 5.91073600  | -0.14266000 |

|   |             |            |             |
|---|-------------|------------|-------------|
| C | -0.09730400 | 7.33437500 | 2.66072700  |
| H | 0.59598700  | 5.34118200 | 2.96405400  |
| C | -0.93493500 | 8.18582800 | 1.94382200  |
| H | -2.40323300 | 8.29642500 | 0.36728100  |
| H | 0.52420400  | 7.72544000 | 3.46190300  |
| H | -0.96983600 | 9.24746400 | 2.17207200  |
| C | -2.14169200 | 3.28115100 | 1.69858200  |
| H | -2.24920200 | 2.26275300 | 1.31499300  |
| H | -2.98942200 | 3.85517500 | 1.30960300  |
| C | -2.20468300 | 3.23377900 | 3.22037600  |
| C | -2.58034700 | 4.31586500 | 3.92335400  |
| H | -2.81846400 | 5.21964800 | 3.36263600  |
| C | -1.92606600 | 1.87808600 | 3.83168100  |
| H | -2.72018300 | 1.16953100 | 3.55987500  |
| H | -1.00092300 | 1.43069200 | 3.45002600  |
| H | -1.85778000 | 1.89694400 | 4.92133900  |
| C | -2.73609500 | 4.45786300 | 5.41171400  |
| H | -2.13297700 | 5.29666500 | 5.78539800  |
| H | -3.77867200 | 4.68609700 | 5.67473900  |
| H | -2.44346100 | 3.56237200 | 5.96561200  |
| C | 2.05907400  | 5.29855700 | -2.34106600 |
| H | 1.47786300  | 5.90488600 | -3.04479600 |
| H | 2.83980400  | 5.93490600 | -1.91410200 |
| H | 2.55680400  | 4.50210800 | -2.89987300 |

TS-1-1-6SS

l imaginary frequency

H = -5393.912882

G = -5394.117237

E(M06-2X-DCM) = -5394.839246

|   |             |            |             |
|---|-------------|------------|-------------|
| C | 2.76908300  | 3.39139400 | 1.92446900  |
| C | 1.59218000  | 3.16315800 | 2.93655400  |
| H | 2.02953800  | 3.20004300 | 3.94537100  |
| H | 0.93183600  | 4.03060100 | 2.84485100  |
| C | 0.72932600  | 1.91803300 | 2.93859700  |
| C | 2.16008700  | 3.70460700 | 0.52849200  |
| H | 2.91245400  | 3.57560300 | -0.25507700 |
| H | 1.87312100  | 4.75549900 | 0.51437100  |
| N | 0.95867900  | 2.96312200 | 0.17612100  |
| C | -0.22424500 | 3.56149800 | -0.17783500 |
| N | -1.11028300 | 2.65518300 | -0.70296900 |
| C | -2.41781600 | 2.77771800 | -1.19492200 |
| C | -3.32358000 | 3.79851100 | -0.86759000 |
| C | -2.84334000 | 1.74012300 | -2.04228200 |

|   |             |             |             |
|---|-------------|-------------|-------------|
| C | -4.61449700 | 3.76858600  | -1.39567200 |
| C | -4.13441700 | 1.73198500  | -2.56155000 |
| H | -2.15591400 | 0.93807000  | -2.29227200 |
| C | -5.03548700 | 2.74982800  | -2.25040400 |
| H | -6.03680400 | 2.75065300  | -2.66347100 |
| C | -4.57694200 | 0.56422700  | -3.39792700 |
| C | -5.61192400 | 4.80994000  | -0.95917400 |
| F | -3.58030500 | 0.09243200  | -4.18397200 |
| F | -5.61709300 | 0.86865600  | -4.19807600 |
| F | -4.97445000 | -0.48127400 | -2.61913700 |
| F | -5.02456500 | 5.96657000  | -0.59881200 |
| F | -6.32954500 | 4.38051400  | 0.11296000  |
| F | -6.50609000 | 5.08853100  | -1.93341600 |
| S | -0.53728200 | 5.20793700  | 0.04095600  |
| H | -3.01614700 | 4.60303700  | -0.21576000 |
| C | 1.20044100  | 0.64055100  | 3.26765000  |
| H | -0.75153100 | 1.69807600  | -0.76434700 |
| H | 1.06671700  | 1.98416600  | -0.08667500 |
| H | 1.16901700  | -0.20578900 | 2.19774400  |
| O | -1.36288800 | -1.59604700 | 0.14505500  |
| O | 0.86735200  | -2.24066900 | -1.06376900 |
| P | 0.20571600  | -1.18722200 | -0.01555200 |
| O | 0.22215100  | 0.22999000  | -0.48440100 |
| C | -2.76865100 | -5.47841400 | 0.92368200  |
| C | -2.20732600 | -5.16452000 | -0.30723800 |
| C | -1.83815700 | -3.84461200 | -0.61302300 |
| C | -2.53245900 | -3.14006200 | 1.61880400  |
| C | -2.97468300 | -4.45673400 | 1.84482700  |
| C | 0.48024700  | -2.13218600 | -2.41670500 |
| C | -0.71722700 | -2.72018700 | -2.81476000 |
| C | -1.20697500 | -2.47326900 | -4.10811500 |
| C | -0.46110100 | -1.73555900 | -5.01947400 |
| C | 0.79040000  | -1.25871800 | -4.63599800 |
| C | 1.28862200  | -1.43082700 | -3.33246300 |
| H | -3.47781500 | -4.67161800 | 2.78192700  |
| H | 1.40525000  | -0.71871100 | -5.34975600 |
| C | -1.60564300 | -3.74028500 | -2.11817400 |
| C | -1.11814000 | -5.19457700 | -2.42789200 |
| H | -1.23491600 | -5.45714300 | -3.48379700 |
| H | -0.05343200 | -5.26803900 | -2.17798700 |
| H | -3.27980700 | -2.41433100 | -4.76253200 |
| H | -2.50810800 | -3.99042000 | -4.94142500 |
| C | -1.89034700 | -2.87553300 | 0.38985800  |
| H | -3.07463100 | -6.49534200 | 1.15520700  |

|   |             |             |             |
|---|-------------|-------------|-------------|
| H | -0.83637600 | -1.54470400 | -6.02142600 |
| C | -1.94197000 | -6.08632100 | -1.47670700 |
| H | -2.87885500 | -6.41823500 | -1.94505300 |
| H | -1.40332200 | -6.99218000 | -1.17587900 |
| C | -2.56816900 | -3.10288500 | -4.29640900 |
| C | -2.96492700 | -3.47332100 | -2.85299000 |
| H | -3.64410100 | -4.32861000 | -2.79257300 |
| H | -3.46389900 | -2.61833400 | -2.38451900 |
| C | 2.66566200  | -0.91681000 | -3.04744400 |
| C | 3.74150300  | -1.83213300 | -2.93625600 |
| C | 2.91517500  | 0.47706800  | -3.05972900 |
| C | 3.56287000  | -3.25184100 | -2.98028500 |
| C | 5.09259100  | -1.33319700 | -2.80918000 |
| C | 4.27389200  | 0.96155200  | -2.95845800 |
| C | 4.62609900  | -4.10964800 | -2.87320100 |
| H | 2.56252100  | -3.65112100 | -3.10071100 |
| C | 6.17382100  | -2.26236100 | -2.69289700 |
| C | 5.32182100  | 0.04585200  | -2.82802600 |
| C | 5.95128600  | -3.61237300 | -2.71986500 |
| H | 4.45867700  | -5.18269900 | -2.90630300 |
| H | 7.18196300  | -1.86764900 | -2.59034400 |
| H | 6.34275200  | 0.41517000  | -2.75351700 |
| H | 6.78115400  | -4.30828700 | -2.63323000 |
| C | -2.85475200 | -2.11922900 | 2.66391300  |
| C | -3.70284000 | -1.02282300 | 2.35164100  |
| C | -2.44354400 | -2.33641500 | 4.00657600  |
| C | -4.23057800 | -0.78602800 | 1.04166900  |
| C | -4.10840700 | -0.11067600 | 3.39931600  |
| C | -2.91337300 | -1.45237100 | 5.05096000  |
| C | -5.03151100 | 0.29309500  | 0.77443400  |
| H | -4.00087900 | -1.48255300 | 0.24484500  |
| C | -4.92604400 | 1.01783800  | 3.07297600  |
| C | -3.71706700 | -0.35944100 | 4.71767200  |
| C | -5.36785500 | 1.22674200  | 1.79485400  |
| H | -5.41460000 | 0.43375800  | -0.23030000 |
| H | -5.19431600 | 1.70463500  | 3.87252400  |
| H | -4.05351800 | 0.31171300  | 5.50575700  |
| H | -5.97040900 | 2.09645400  | 1.54910300  |
| C | 2.14717300  | 2.79347200  | -3.22573600 |
| H | 1.33590600  | 3.51026500  | -3.31690500 |
| C | 1.87101200  | 1.45125000  | -3.18067400 |
| H | 0.84445700  | 1.10883600  | -3.22992300 |
| C | 3.49013400  | 3.26330900  | -3.14336500 |
| H | 3.68949600  | 4.33046400  | -3.18529300 |

|   |              |              |              |
|---|--------------|--------------|--------------|
| C | 4. 51911000  | 2. 37038000  | -3. 00580100 |
| H | 5. 54782300  | 2. 71557300  | -2. 93469300 |
| C | -1. 19210200 | -3. 58390700 | 5. 69786400  |
| H | -0. 50206600 | -4. 38350200 | 5. 95264700  |
| C | -1. 69877200 | -2. 74020400 | 6. 72665900  |
| H | -1. 41149700 | -2. 91660800 | 7. 75972500  |
| C | -2. 52715000 | -1. 69924300 | 6. 40607200  |
| H | -2. 90629800 | -1. 03232500 | 7. 17710800  |
| C | -1. 54790900 | -3. 38977900 | 4. 38794200  |
| H | -1. 11811000 | -4. 01963300 | 3. 61892400  |
| N | 1. 08673000  | -1. 35921900 | 1. 37114200  |
| S | 1. 71341000  | -2. 75474900 | 1. 98176300  |
| C | 3. 13724300  | -3. 24479200 | 0. 83164700  |
| O | 0. 77629200  | -3. 87818300 | 1. 89940400  |
| O | 2. 36782300  | -2. 41270400 | 3. 24449200  |
| F | 2. 72223500  | -4. 14646000 | -0. 05539500 |
| F | 3. 62443700  | -2. 17889500 | 0. 19518300  |
| F | 4. 09897200  | -3. 78570000 | 1. 58278100  |
| C | 3. 76987600  | 2. 22521800  | 1. 96236900  |
| C | 4. 45444700  | 1. 93913200  | 3. 15922300  |
| C | 4. 06127600  | 1. 42889600  | 0. 84874900  |
| C | 5. 39263700  | 0. 91320900  | 3. 23734100  |
| H | 4. 25352600  | 2. 52404700  | 4. 05313800  |
| C | 5. 01227400  | 0. 40545900  | 0. 91833200  |
| H | 3. 56029200  | 1. 59563000  | -0. 09844600 |
| C | 5. 68165500  | 0. 14171900  | 2. 10989700  |
| H | 5. 89818900  | 0. 71748200  | 4. 17928400  |
| H | 5. 21623400  | -0. 18719600 | 0. 03350600  |
| H | 6. 41372900  | -0. 65902500 | 2. 16454300  |
| C | 3. 46873400  | 4. 72409000  | 2. 40333300  |
| H | 2. 66773300  | 5. 44716500  | 2. 59633800  |
| H | 3. 95319100  | 4. 53019600  | 3. 36874000  |
| C | 4. 47689500  | 5. 36981900  | 1. 46534800  |
| C | 4. 14152000  | 6. 51039400  | 0. 83711200  |
| H | 3. 14141200  | 6. 90639700  | 1. 01990300  |
| C | 0. 30647600  | -0. 21746400 | 4. 18066700  |
| H | -0. 66214200 | -0. 43422100 | 3. 73206700  |
| H | 0. 80343200  | -1. 16366500 | 4. 38897500  |
| H | 0. 13002700  | 0. 30063800  | 5. 13167500  |
| C | 4. 96279600  | 7. 34060600  | -0. 10854600 |
| H | 4. 46584600  | 7. 41537700  | -1. 08559300 |
| H | 5. 06447900  | 8. 36863500  | 0. 26511100  |
| H | 5. 96741200  | 6. 94463900  | -0. 27728400 |
| C | 5. 83128200  | 4. 70886300  | 1. 34920300  |



|   |             |            |            |
|---|-------------|------------|------------|
| H | 6.55430000  | 5.33239000 | 0.81807500 |
| H | 6.24244200  | 4.49362800 | 2.34393900 |
| H | 5.77229300  | 3.74605500 | 0.82885600 |
| H | 2.26161500  | 0.58721000 | 3.50964400 |
| C | -0.74864400 | 2.15695800 | 2.86339700 |
| H | -0.99491900 | 3.07905200 | 2.33444600 |
| H | -1.28611800 | 1.31567500 | 2.41722600 |
| H | -1.13264800 | 2.25235300 | 3.89196500 |

TS-1-1-6SS-1

l imaginary frequency

H = -5393.910600

G = -5394.115144

E(M06-2X-DCM) = -5394.837522

|   |             |             |             |
|---|-------------|-------------|-------------|
| C | 2.89933900  | 3.35222600  | 1.74869000  |
| C | 1.74054200  | 3.22178200  | 2.79643400  |
| H | 2.20246800  | 3.25121400  | 3.79378800  |
| H | 1.13392900  | 4.12771900  | 2.70286200  |
| C | 0.80386900  | 2.03196000  | 2.84135700  |
| C | 2.25725900  | 3.63970700  | 0.36150900  |
| H | 2.97295900  | 3.44545800  | -0.44178200 |
| H | 2.00582300  | 4.69927300  | 0.32008100  |
| N | 1.01564800  | 2.93683200  | 0.07343700  |
| C | -0.14861700 | 3.57503900  | -0.27929200 |
| N | -1.08222900 | 2.69195100  | -0.75602800 |
| C | -2.40055400 | 2.84952800  | -1.20773000 |
| C | -3.26081400 | 3.90572400  | -0.87111500 |
| C | -2.88828300 | 1.80862100  | -2.01653600 |
| C | -4.57107200 | 3.90476400  | -1.35041700 |
| C | -4.19713700 | 1.83011800  | -2.48855600 |
| H | -2.23537500 | 0.98007200  | -2.27245500 |
| C | -5.05448200 | 2.88182300  | -2.16644800 |
| H | -6.07030300 | 2.90518500  | -2.54168600 |
| C | -4.70446800 | 0.65908700  | -3.28295100 |
| C | -5.51987400 | 4.98407200  | -0.89794700 |
| F | -3.75377500 | 0.14615700  | -4.09953100 |
| F | -5.76848800 | 0.97657200  | -4.04564300 |
| F | -5.09613500 | -0.36070600 | -2.46810800 |
| F | -4.88559200 | 6.13118000  | -0.59020400 |
| F | -6.20241600 | 4.59966200  | 0.21332600  |
| F | -6.44646600 | 5.26616600  | -1.84022800 |
| S | -0.38627100 | 5.23966100  | -0.11108100 |
| H | -2.90489000 | 4.71390500  | -0.24898900 |
| C | 1.20693100  | 0.73445900  | 3.18432600  |

|   |             |             |             |
|---|-------------|-------------|-------------|
| H | -0.76142400 | 1.72046600  | -0.80434200 |
| H | 1.08047800  | 1.94910000  | -0.17170500 |
| H | 1.14613300  | -0.13213400 | 2.13360500  |
| O | -1.44500100 | -1.54431700 | 0.18649300  |
| O | 0.74040500  | -2.26368700 | -1.06218000 |
| P | 0.12493300  | -1.16869600 | -0.02795000 |
| O | 0.15435900  | 0.23184300  | -0.54411500 |
| C | -2.91532200 | -5.38007800 | 1.07142800  |
| C | -2.38209300 | -5.09930700 | -0.17983000 |
| C | -1.98918000 | -3.79402000 | -0.51684800 |
| C | -2.60147400 | -3.03777400 | 1.72242600  |
| C | -3.06847500 | -4.33983700 | 1.98186200  |
| C | 0.32350200  | -2.17069700 | -2.40815700 |
| C | -0.89828700 | -2.73463200 | -2.76569000 |
| C | -1.41558600 | -2.49625900 | -4.04991900 |
| C | -0.67463800 | -1.79493800 | -4.99331000 |
| C | 0.59738300  | -1.34301200 | -4.64978400 |
| C | 1.12382900  | -1.50280300 | -3.35564400 |
| H | -3.54849200 | -4.52809100 | 2.93660600  |
| H | 1.20635300  | -0.83017700 | -5.38814100 |
| C | -1.79563100 | -3.71843800 | -2.02917200 |
| C | -1.35683000 | -5.19005400 | -2.33021400 |
| H | -1.51188700 | -5.46467900 | -3.37807800 |
| H | -0.28747500 | -5.28898400 | -2.11092700 |
| H | -3.50288400 | -2.38635400 | -4.64847900 |
| H | -2.78327600 | -3.98744600 | -4.82259300 |
| C | -1.99072600 | -2.80778600 | 0.47065700  |
| H | -3.24006700 | -6.38520100 | 1.32764400  |
| H | -1.07053100 | -1.61187800 | -5.98877100 |
| C | -2.17541100 | -6.04514100 | -1.34179500 |
| H | -3.13420800 | -6.35854500 | -1.77743700 |
| H | -1.65235100 | -6.96068300 | -1.04275800 |
| C | -2.79910200 | -3.08862200 | -4.19076700 |
| C | -3.16648300 | -3.42419500 | -2.73110100 |
| H | -3.86764800 | -4.25856600 | -2.63793400 |
| H | -3.62793800 | -2.54775100 | -2.26364800 |
| C | 2.51602500  | -1.00735400 | -3.11485900 |
| C | 3.57846500  | -1.93797500 | -3.00154000 |
| C | 2.78946500  | 0.38105600  | -3.17589500 |
| C | 3.37429800  | -3.35482300 | -2.99724400 |
| C | 4.94074200  | -1.45982400 | -2.92397700 |
| C | 4.15866300  | 0.84351600  | -3.12604800 |
| C | 4.42491500  | -4.22801100 | -2.89003500 |
| H | 2.36444300  | -3.73945100 | -3.07997600 |

|   |             |             |             |
|---|-------------|-------------|-------------|
| C | 6.00842300  | -2.40431700 | -2.80609600 |
| C | 5.19359400  | -0.08652400 | -2.99329000 |
| C | 5.76193700  | -3.75029500 | -2.78537200 |
| H | 4.23816000  | -5.29835300 | -2.88530700 |
| H | 7.02556500  | -2.02494400 | -2.74148800 |
| H | 6.22249800  | 0.26612900  | -2.95828800 |
| H | 6.58160400  | -4.45809900 | -2.69796900 |
| C | -2.86615400 | -1.99566500 | 2.76276400  |
| C | -3.69035700 | -0.87839800 | 2.46078100  |
| C | -2.42352500 | -2.20909900 | 4.09630500  |
| C | -4.24598400 | -0.63948700 | 1.16268800  |
| C | -4.04052300 | 0.05660800  | 3.50844000  |
| C | -2.84199800 | -1.30259700 | 5.14308400  |
| C | -5.01913300 | 0.46174800  | 0.90393700  |
| H | -4.05998000 | -1.35148200 | 0.36819500  |
| C | -4.83074300 | 1.20703100  | 3.19053600  |
| C | -3.62345000 | -0.19087600 | 4.81902300  |
| C | -5.29844400 | 1.41681000  | 1.92180700  |
| H | -5.42445100 | 0.60347100  | -0.09184300 |
| H | -5.05665000 | 1.91006800  | 3.98907500  |
| H | -3.91954900 | 0.49778800  | 5.60818600  |
| H | -5.87924700 | 2.30280700  | 1.68154700  |
| C | 2.05812400  | 2.70508900  | -3.39736100 |
| H | 1.25736500  | 3.43346000  | -3.48960700 |
| C | 1.75984000  | 1.37050500  | -3.29927600 |
| H | 0.72635500  | 1.04619800  | -3.30770500 |
| C | 3.41118900  | 3.15210100  | -3.37013000 |
| H | 3.62856400  | 4.21293800  | -3.46033300 |
| C | 4.42767200  | 2.24522600  | -3.22903400 |
| H | 5.46401200  | 2.57306800  | -3.19882600 |
| C | -1.15699100 | -3.46917700 | 5.76702900  |
| H | -0.47925100 | -4.28234000 | 6.01163600  |
| C | -1.61545100 | -2.60339900 | 6.79987200  |
| H | -1.30478600 | -2.77629300 | 7.82673900  |
| C | -2.42634600 | -1.54552900 | 6.49012500  |
| H | -2.76776800 | -0.86125200 | 7.26357200  |
| C | -1.54360000 | -3.27986400 | 4.46505300  |
| H | -1.14986400 | -3.92772900 | 3.69182400  |
| N | 1.03479300  | -1.30792600 | 1.34271700  |
| S | 1.65722700  | -2.69147500 | 1.98279500  |
| C | 3.06366600  | -3.21544000 | 0.82563300  |
| O | 0.71130900  | -3.80960000 | 1.93689000  |
| O | 2.32540100  | -2.32258300 | 3.23058500  |
| F | 2.63539200  | -4.15128900 | -0.01881400 |

|   |             |             |             |
|---|-------------|-------------|-------------|
| F | 3.53077600  | -2.17181200 | 0.13977400  |
| F | 4.04361700  | -3.72285400 | 1.57655700  |
| C | 3.85591900  | 2.15006900  | 1.80255100  |
| C | 4.49816800  | 1.83397600  | 3.01553600  |
| C | 4.16830300  | 1.36444400  | 0.68848300  |
| C | 5.40758000  | 0.78410700  | 3.11084400  |
| H | 4.28666700  | 2.41507500  | 3.90970700  |
| C | 5.08965600  | 0.31544300  | 0.77535300  |
| H | 3.70333900  | 1.55347700  | -0.27245800 |
| C | 5.71209200  | 0.01802500  | 1.98362200  |
| H | 5.87705400  | 0.56428000  | 4.06604900  |
| H | 5.30487200  | -0.27242900 | -0.11043600 |
| H | 6.41949700  | -0.80363600 | 2.05182500  |
| C | 3.69615900  | 4.65014800  | 2.17201900  |
| H | 2.96601200  | 5.46903300  | 2.23417100  |
| H | 4.06799200  | 4.48965700  | 3.18876000  |
| C | 4.86417000  | 5.08853000  | 1.29937900  |
| C | 6.11547400  | 4.76935400  | 1.67027300  |
| H | 6.23342700  | 4.18312700  | 2.58162300  |
| C | 0.27340700  | -0.06331000 | 4.11043200  |
| H | -0.70709700 | -0.23364400 | 3.66717700  |
| H | 0.72023000  | -1.03205100 | 4.32974100  |
| H | 0.12723700  | 0.47339600  | 5.05627700  |
| C | 7.40788900  | 5.09318400  | 0.97642700  |
| H | 8.09682100  | 5.61334200  | 1.65579300  |
| H | 7.91702300  | 4.17039200  | 0.66528400  |
| H | 7.28010200  | 5.71414800  | 0.08601500  |
| C | 4.54708500  | 5.92439600  | 0.07668600  |
| H | 5.40861600  | 6.50900800  | -0.25609200 |
| H | 4.22347700  | 5.31351800  | -0.77579400 |
| H | 3.73170000  | 6.62791900  | 0.28454500  |
| H | 2.26584000  | 0.62796900  | 3.41974000  |
| C | -0.65859800 | 2.35896900  | 2.80131800  |
| H | -0.86336900 | 3.28779000  | 2.26652600  |
| H | -1.25816900 | 1.54631900  | 2.38205700  |
| H | -1.00688300 | 2.48986300  | 3.83873400  |

TS-1-1-6SS-2

l imaginary frequency

H = -5393.910192

G = -5394.114919

E(M06-2X-DCM) = -5394.835677

|   |             |            |            |
|---|-------------|------------|------------|
| C | 0.94931300  | 4.63647300 | 0.69930200 |
| C | -0.02945500 | 4.23421000 | 1.85081300 |

|   |             |             |             |
|---|-------------|-------------|-------------|
| H | 0.36446400  | 4.67467300  | 2.77679400  |
| H | -0.97754200 | 4.73891300  | 1.64833700  |
| C | -0.32363100 | 2.78806500  | 2.18798500  |
| C | 0.28268900  | 4.31760500  | -0.66495100 |
| H | 1.01920600  | 4.41099300  | -1.47166000 |
| H | -0.48523800 | 5.06283500  | -0.85299800 |
| N | -0.39948300 | 3.03548800  | -0.76221800 |
| C | -1.68108300 | 2.89674700  | -1.23498500 |
| N | -2.01801400 | 1.58059800  | -1.41417800 |
| C | -3.19872800 | 0.95602000  | -1.84474600 |
| C | -4.49021300 | 1.49472400  | -1.73990400 |
| C | -3.04540600 | -0.34360600 | -2.35649300 |
| C | -5.58718100 | 0.74000800  | -2.15576500 |
| C | -4.15327900 | -1.07858400 | -2.76886800 |
| H | -2.05257800 | -0.77637500 | -2.42821900 |
| C | -5.43805600 | -0.54373100 | -2.68064200 |
| H | -6.29941000 | -1.11051100 | -3.01247500 |
| C | -3.95862500 | -2.49463600 | -3.23364000 |
| C | -6.97637800 | 1.28310700  | -1.94397200 |
| F | -2.80592600 | -2.65081600 | -3.92637800 |
| F | -4.96667000 | -2.92169400 | -4.01889900 |
| F | -3.89009200 | -3.35697200 | -2.18053200 |
| F | -7.00883900 | 2.62916400  | -1.94759400 |
| F | -7.48230500 | 0.87935100  | -0.74809200 |
| F | -7.83584900 | 0.84808700  | -2.89157700 |
| S | -2.71365600 | 4.20113700  | -1.53590600 |
| H | -4.62926800 | 2.48984100  | -1.34378400 |
| C | 0.59491000  | 1.94019100  | 2.82205600  |
| H | -1.26696100 | 0.91425300  | -1.20965200 |
| H | 0.16878300  | 2.18935900  | -0.73755300 |
| H | 1.04978600  | 0.95376600  | 2.00524400  |
| O | -0.38963400 | -1.94577900 | 0.58015800  |
| O | 1.95805800  | -1.78547000 | -0.56735700 |
| P | 0.81852200  | -0.91838400 | 0.20631100  |
| O | 0.21060800  | 0.16293400  | -0.62441000 |
| C | 0.10647600  | -5.67244000 | 2.45880700  |
| C | 0.54089200  | -5.47519300 | 1.15458200  |
| C | 0.27796300  | -4.26929800 | 0.48515100  |
| C | -0.81181300 | -3.39948800 | 2.48814400  |
| C | -0.61038500 | -4.65825300 | 3.08481800  |
| C | 1.64826400  | -2.23485100 | -1.86947800 |
| C | 0.88308200  | -3.38992900 | -2.00984700 |
| C | 0.41147800  | -3.75255100 | -3.28244700 |
| C | 0.78265100  | -3.02824700 | -4.40857500 |

|   |              |              |              |
|---|--------------|--------------|--------------|
| C | 1. 64894300  | -1. 94838500 | -4. 25765900 |
| C | 2. 09574800  | -1. 51699100 | -2. 99566200 |
| H | -1. 02112200 | -4. 82394300 | 4. 07534300  |
| H | 1. 98675100  | -1. 40049000 | -5. 13209200 |
| C | 0. 52747400  | -4. 47636600 | -1. 00594300 |
| C | 1. 64925900  | -5. 56593700 | -0. 95484800 |
| H | 1. 73007200  | -6. 12487700 | -1. 89215800 |
| H | 2. 61056300  | -5. 07147400 | -0. 77355800 |
| H | -1. 40947100 | -4. 83299000 | -3. 77631000 |
| H | 0. 01314400  | -5. 85879200 | -3. 58784000 |
| C | -0. 28197300 | -3. 20558600 | 1. 19394100  |
| H | 0. 28878600  | -6. 61272800 | 2. 97261700  |
| H | 0. 42005200  | -3. 30622000 | -5. 39466100 |
| C | 1. 27570700  | -6. 44507200 | 0. 25616800  |
| H | 0. 63084200  | -7. 28458300 | -0. 03810400 |
| H | 2. 15331200  | -6. 88078400 | 0. 74733400  |
| C | -0. 48959200 | -4. 96294400 | -3. 19779800 |
| C | -0. 75517500 | -5. 07261300 | -1. 68307700 |
| H | -0. 96499300 | -6. 09271000 | -1. 34868300 |
| H | -1. 61904700 | -4. 45199000 | -1. 42209300 |
| C | 3. 07235900  | -0. 38190700 | -2. 97537900 |
| C | 4. 44058200  | -0. 64486300 | -2. 71612000 |
| C | 2. 66315100  | 0. 90531700  | -3. 40110500 |
| C | 4. 92482100  | -1. 93300800 | -2. 32135800 |
| C | 5. 41468400  | 0. 40964800  | -2. 88951700 |
| C | 3. 65059900  | 1. 94423700  | -3. 59136900 |
| C | 6. 25606900  | -2. 15406300 | -2. 08336000 |
| H | 4. 21843300  | -2. 74689800 | -2. 20751000 |
| C | 6. 79448300  | 0. 13796900  | -2. 62814800 |
| C | 4. 99601400  | 1. 66848200  | -3. 33134000 |
| C | 7. 20718600  | -1. 10519200 | -2. 23207400 |
| H | 6. 59266000  | -3. 14129900 | -1. 77901800 |
| H | 7. 51088600  | 0. 94581200  | -2. 75779700 |
| H | 5. 73679800  | 2. 45131400  | -3. 48206800 |
| H | 8. 25826800  | -1. 29944800 | -2. 03718600 |
| C | -1. 64043200 | -2. 40907200 | 3. 24287500  |
| C | -2. 86704900 | -1. 94233300 | 2. 69835000  |
| C | -1. 27703300 | -2. 05912200 | 4. 57157400  |
| C | -3. 34540000 | -2. 31899200 | 1. 40214900  |
| C | -3. 71826300 | -1. 07880200 | 3. 48825100  |
| C | -2. 17510800 | -1. 25482900 | 5. 37086900  |
| C | -4. 52244400 | -1. 82909400 | 0. 90035000  |
| H | -2. 76879900 | -3. 01664800 | 0. 80766700  |
| C | -4. 92857400 | -0. 57010900 | 2. 91776600  |

|   |             |             |             |
|---|-------------|-------------|-------------|
| C | -3.35884500 | -0.77569000 | 4.80423800  |
| C | -5.31819400 | -0.92041400 | 1.65365000  |
| H | -4.85057700 | -2.14236400 | -0.08477000 |
| H | -5.53710700 | 0.10002300  | 3.52075000  |
| H | -4.02110900 | -0.15466500 | 5.40462400  |
| H | -6.22647000 | -0.51408800 | 1.21794400  |
| C | 0.93051600  | 2.48187900  | -4.10546400 |
| H | -0.11551100 | 2.70571500  | -4.29525400 |
| C | 1.29398900  | 1.23459700  | -3.66681000 |
| H | 0.53710000  | 0.47702300  | -3.50356400 |
| C | 1.91127100  | 3.49589700  | -4.30819900 |
| H | 1.60505000  | 4.47576900  | -4.66407900 |
| C | 3.23031400  | 3.23215000  | -4.05167100 |
| H | 3.98799000  | 3.99878000  | -4.19563300 |
| C | 0.27546600  | -2.10851400 | 6.46122400  |
| H | 1.23413800  | -2.40357500 | 6.87874900  |
| C | -0.63777500 | -1.36322600 | 7.25941600  |
| H | -0.38104500 | -1.11722900 | 8.28627900  |
| C | -1.82310700 | -0.94109300 | 6.72142000  |
| H | -2.52213000 | -0.35099000 | 7.30979700  |
| C | -0.02955000 | -2.44216600 | 5.16651100  |
| H | 0.69872800  | -2.97331100 | 4.56623300  |
| N | 1.58181100  | -0.28055200 | 1.52301400  |
| S | 2.72797000  | -1.00226300 | 2.45737100  |
| C | 4.29658200  | -1.07848200 | 1.39551100  |
| O | 2.42038800  | -2.40493300 | 2.75016600  |
| O | 3.05084300  | -0.06486900 | 3.53324100  |
| F | 4.40949400  | -2.28001200 | 0.83205700  |
| F | 4.28024900  | -0.14044300 | 0.44927100  |
| F | 5.34315300  | -0.87542800 | 2.19929900  |
| C | 2.34658700  | 4.01789500  | 0.89800800  |
| C | 3.04159600  | 4.25092800  | 2.10085100  |
| C | 3.00792800  | 3.28364000  | -0.09242700 |
| C | 4.33136400  | 3.77026700  | 2.30766200  |
| H | 2.57055900  | 4.81885500  | 2.89927800  |
| C | 4.30800900  | 2.80775400  | 0.10617500  |
| H | 2.52735200  | 3.06907500  | -1.04041300 |
| C | 4.97525500  | 3.04499100  | 1.30370700  |
| H | 4.83149000  | 3.96205000  | 3.25314800  |
| H | 4.78750400  | 2.23869100  | -0.68236400 |
| H | 5.98049900  | 2.66343400  | 1.45869600  |
| C | 1.16804200  | 6.20555000  | 0.75174700  |
| H | 1.80593500  | 6.40867400  | 1.61544600  |
| H | 1.77289700  | 6.45631100  | -0.13069700 |

|   |             |            |             |
|---|-------------|------------|-------------|
| C | -0.03372000 | 7.13960100 | 0.82642900  |
| C | -0.41375600 | 7.60853200 | 2.02845100  |
| H | 0.15695400  | 7.28065700 | 2.89972400  |
| C | 0.04996800  | 1.00917900 | 3.91675700  |
| H | -0.69233800 | 0.30906000 | 3.53500200  |
| H | 0.86968900  | 0.43551200 | 4.34753700  |
| H | -0.41873600 | 1.59557900 | 4.71695000  |
| C | -1.54433200 | 8.54490200 | 2.34861900  |
| H | -2.27414400 | 8.05897500 | 3.01099700  |
| H | -1.17921200 | 9.43057800 | 2.88639700  |
| H | -2.08477100 | 8.88517100 | 1.46201200  |
| C | -0.69184900 | 7.56503000 | -0.47085000 |
| H | -1.15989500 | 8.54984900 | -0.38667600 |
| H | 0.04823600  | 7.62228600 | -1.27806700 |
| H | -1.47008000 | 6.86451300 | -0.79999700 |
| H | 1.55356800  | 2.39916100 | 3.06414200  |
| C | -1.75954600 | 2.37090300 | 2.08657600  |
| H | -2.31761100 | 2.96959100 | 1.36512600  |
| H | -1.87137700 | 1.30781500 | 1.85541100  |
| H | -2.22645100 | 2.51793800 | 3.07404800  |

TS-1-1-6SS-3

l imaginary frequency

H = -5393.910109

G = -5394.114614

E(M06-2X-DCM) = -5394.836875

|   |             |             |             |
|---|-------------|-------------|-------------|
| C | 0.86879900  | 4.57484000  | 1.13540500  |
| C | -0.08330400 | 4.04084300  | 2.25618800  |
| H | 0.30731900  | 4.40431700  | 3.21607500  |
| H | -1.05100200 | 4.52409500  | 2.09689300  |
| C | -0.33172000 | 2.56117300  | 2.46598200  |
| C | 0.17538100  | 4.36631800  | -0.23590900 |
| H | 0.88855100  | 4.55202700  | -1.04818900 |
| H | -0.61231800 | 5.11361000  | -0.32447500 |
| N | -0.48068400 | 3.08300300  | -0.43409800 |
| C | -1.76505000 | 2.95861700  | -0.90745500 |
| N | -2.07553700 | 1.65405200  | -1.19362400 |
| C | -3.24707800 | 1.04399600  | -1.66657700 |
| C | -4.54816900 | 1.54293900  | -1.50024200 |
| C | -3.07329400 | -0.20133800 | -2.29375500 |
| C | -5.63441000 | 0.80439800  | -1.96973500 |
| C | -4.17088700 | -0.92058000 | -2.75827500 |
| H | -2.07264900 | -0.60431700 | -2.41408200 |
| C | -5.46530100 | -0.42396100 | -2.60884900 |



|   |             |             |             |
|---|-------------|-------------|-------------|
| H | -6.31879300 | -0.97769000 | -2.98060500 |
| C | -3.95278600 | -2.28478800 | -3.34997600 |
| C | -7.03163800 | 1.29534600  | -1.69389100 |
| F | -2.80707800 | -2.35286900 | -4.06816300 |
| F | -4.96263700 | -2.66306400 | -4.15771100 |
| F | -3.85070000 | -3.23583300 | -2.37905800 |
| F | -7.09317400 | 2.63549000  | -1.57884700 |
| F | -7.51151200 | 0.77719000  | -0.53171500 |
| F | -7.89542800 | 0.92561000  | -2.66507400 |
| S | -2.82416200 | 4.26141300  | -1.08868100 |
| H | -4.70204500 | 2.49577900  | -1.01545800 |
| C | 0.62411400  | 1.68742100  | 3.00249500  |
| H | -1.30698000 | 0.99013000  | -1.05862100 |
| H | 0.10703600  | 2.25254500  | -0.49854000 |
| H | 1.07819300  | 0.78683600  | 2.09592900  |
| O | -0.33778300 | -1.99997200 | 0.43657600  |
| O | 1.98504800  | -1.68918400 | -0.73050900 |
| P | 0.84504100  | -0.91923400 | 0.13891100  |
| O | 0.20171900  | 0.22204100  | -0.57679200 |
| C | 0.26139700  | -5.86745300 | 1.96777700  |
| C | 0.66991300  | -5.54633200 | 0.67989400  |
| C | 0.37182400  | -4.29175600 | 0.12424200  |
| C | -0.69952800 | -3.62545600 | 2.21345200  |
| C | -0.46418400 | -4.92783400 | 2.69248900  |
| C | 1.65866300  | -2.02685300 | -2.06176700 |
| C | 0.91568100  | -3.18196200 | -2.29193100 |
| C | 0.42892600  | -3.44048100 | -3.58408800 |
| C | 0.76287400  | -2.60974000 | -4.64661400 |
| C | 1.60768400  | -1.52728200 | -4.41397800 |
| C | 2.06891900  | -1.20066200 | -3.12607800 |
| H | -0.85450500 | -5.18911800 | 3.67060100  |
| H | 1.91653400  | -0.89532400 | -5.24114000 |
| C | 0.60097500  | -4.36068500 | -1.38292500 |
| C | 1.74651300  | -5.42456400 | -1.44438100 |
| H | 1.82525100  | -5.89600700 | -2.42878200 |
| H | 2.69946400  | -4.92628600 | -1.23205000 |
| H | -1.37556200 | -4.51621300 | -4.14436300 |
| H | 0.07282700  | -5.52022200 | -4.06941800 |
| C | -0.19598600 | -3.30686800 | 0.93350700  |
| H | 0.47087200  | -6.84547300 | 2.39319100  |
| H | 0.38799900  | -2.80701800 | -5.64744300 |
| C | 1.41023900  | -6.41616100 | -0.31176700 |
| H | 0.77833900  | -7.24008600 | -0.67108900 |
| H | 2.30424800  | -6.87446100 | 0.12638300  |

|   |             |             |             |
|---|-------------|-------------|-------------|
| C | -0.44316800 | -4.67473500 | -3.59369100 |
| C | -0.67984700 | -4.92437700 | -2.09088100 |
| H | -0.86161500 | -5.97468200 | -1.84542200 |
| H | -1.55234600 | -4.34960000 | -1.76255000 |
| C | 3.02090500  | -0.04977200 | -3.01805600 |
| C | 4.39916100  | -0.30400900 | -2.80801300 |
| C | 2.57586400  | 1.26167800  | -3.31390300 |
| C | 4.91870500  | -1.61214000 | -2.54615100 |
| C | 5.34659100  | 0.78480800  | -2.89609600 |
| C | 3.53682000  | 2.33665000  | -3.42164800 |
| C | 6.25869100  | -1.82348000 | -2.35236200 |
| H | 4.23253100  | -2.44963600 | -2.49925500 |
| C | 6.73653600  | 0.52211100  | -2.68396500 |
| C | 4.89241700  | 2.06946200  | -3.20997000 |
| C | 7.18364600  | -0.74303500 | -2.41534700 |
| H | 6.62240800  | -2.82704500 | -2.14956100 |
| H | 7.43257900  | 1.35526800  | -2.74751000 |
| H | 5.61297800  | 2.88026400  | -3.29774200 |
| H | 8.24215000  | -0.93008700 | -2.25698400 |
| C | -1.53276400 | -2.72237000 | 3.06641700  |
| C | -2.77768400 | -2.23425300 | 2.58574300  |
| C | -1.15205800 | -2.48425900 | 4.41482000  |
| C | -3.27215100 | -2.50368700 | 1.26902400  |
| C | -3.63076700 | -1.46211000 | 3.46341200  |
| C | -2.05058400 | -1.77276900 | 5.29730300  |
| C | -4.46734800 | -1.99555400 | 0.83247900  |
| H | -2.69316300 | -3.13314300 | 0.60485300  |
| C | -4.86080900 | -0.92985100 | 2.96065700  |
| C | -3.25333000 | -1.26973800 | 4.79515500  |
| C | -5.26663200 | -1.17431900 | 1.67688000  |
| H | -4.80727800 | -2.22646700 | -0.17118800 |
| H | -5.47094600 | -0.32876000 | 3.63103500  |
| H | -3.91647500 | -0.71857300 | 5.45939200  |
| H | -6.19025800 | -0.74975700 | 1.29400700  |
| C | 0.79661100  | 2.85625300  | -3.83824600 |
| H | -0.25738100 | 3.07262400  | -3.98838300 |
| C | 1.19512700  | 1.58227200  | -3.52465600 |
| H | 0.45792400  | 0.79546700  | -3.42033800 |
| C | 1.75124500  | 3.90732100  | -3.96111600 |
| H | 1.41718300  | 4.90874100  | -4.21829100 |
| C | 3.08022000  | 3.65176000  | -3.75210200 |
| H | 3.81824900  | 4.44601700  | -3.83571800 |
| C | 0.43564700  | -2.66866800 | 6.26652500  |
| H | 1.40736400  | -2.97949100 | 6.64014600  |

|   |             |             |             |
|---|-------------|-------------|-------------|
| C | -0.47713700 | -2.01663600 | 7.14306100  |
| H | -0.20649300 | -1.85764600 | 8.18342300  |
| C | -1.68006300 | -1.57318000 | 6.66453900  |
| H | -2.37949400 | -1.05251100 | 7.31473600  |
| C | 0.11336100  | -2.89252300 | 4.95254800  |
| H | 0.84070200  | -3.35306500 | 4.29544000  |
| N | 1.62254800  | -0.39158900 | 1.49527000  |
| S | 2.80153400  | -1.17094200 | 2.33755200  |
| C | 4.34908200  | -1.11841800 | 1.24439500  |
| O | 2.52686400  | -2.60041400 | 2.50824700  |
| O | 3.12983400  | -0.32793200 | 3.48749400  |
| F | 4.46907000  | -2.25765000 | 0.56498000  |
| F | 4.29955300  | -0.09329600 | 0.39434400  |
| F | 5.40838900  | -0.97638100 | 2.04461500  |
| C | 2.28227700  | 3.97743300  | 1.25640400  |
| C | 2.99711300  | 4.13355900  | 2.45985000  |
| C | 2.93652600  | 3.33718500  | 0.19857100  |
| C | 4.30088400  | 3.66754700  | 2.60307000  |
| H | 2.53049800  | 4.62861800  | 3.30808100  |
| C | 4.25038600  | 2.87716600  | 0.33377900  |
| H | 2.43881400  | 3.18683500  | -0.75302000 |
| C | 4.93777500  | 3.03641800  | 1.53299400  |
| H | 4.81768400  | 3.79730800  | 3.55015700  |
| H | 4.72502800  | 2.38203700  | -0.50596100 |
| H | 5.95402500  | 2.66713000  | 1.63792200  |
| C | 1.05408600  | 6.14262600  | 1.29460800  |
| H | 1.71342900  | 6.31300900  | 2.15200900  |
| H | 1.62773200  | 6.45585000  | 0.41338800  |
| C | -0.17055300 | 7.03563700  | 1.44018100  |
| C | -0.71744900 | 7.60720100  | 0.35344200  |
| H | -0.25524800 | 7.38625600  | -0.60978800 |
| C | 0.12914300  | 0.65293600  | 4.02652800  |
| H | -0.60263800 | -0.03367900 | 3.60247900  |
| H | 0.97379200  | 0.06866800  | 4.38938900  |
| H | -0.33624000 | 1.15695000  | 4.88279800  |
| C | -1.90794300 | 8.51727900  | 0.25877000  |
| H | -1.63556900 | 9.46528000  | -0.22469500 |
| H | -2.68337900 | 8.05601100  | -0.36693200 |
| H | -2.35781700 | 8.75118300  | 1.22686200  |
| C | -0.63478600 | 7.30969100  | 2.85454200  |
| H | -1.45205800 | 8.03267800  | 2.89650300  |
| H | -0.97698100 | 6.40339700  | 3.36845100  |
| H | 0.19373300  | 7.71223800  | 3.45409300  |
| H | 1.57650900  | 2.15023300  | 3.26135800  |

|   |             |            |            |
|---|-------------|------------|------------|
| C | -1.75800900 | 2.11377800 | 2.35867800 |
| H | -2.34955600 | 2.75761200 | 1.70603600 |
| H | -1.84539200 | 1.07326400 | 2.03346200 |
| H | -2.20519700 | 2.15554800 | 3.36513100 |

TS-1-1-6SR

1 imaginary frequency

H = -5393.915999

G = -5394.117889

E(M06-2X-DCM) = -5394.845826

|   |             |             |             |
|---|-------------|-------------|-------------|
| C | 3.28494900  | 2.96923400  | 1.22891800  |
| C | 2.74141900  | 2.63844900  | 2.66496100  |
| H | 3.52588500  | 2.06172500  | 3.16389800  |
| H | 2.63373500  | 3.59574500  | 3.19011700  |
| C | 1.42783800  | 1.93431900  | 2.88266700  |
| C | 2.21641100  | 3.71014700  | 0.37719400  |
| H | 2.65702500  | 3.98361100  | -0.58742000 |
| H | 1.94742700  | 4.64811400  | 0.86713800  |
| N | 0.98387800  | 2.97416300  | 0.14008000  |
| C | -0.19980700 | 3.60423800  | -0.15526200 |
| N | -1.16256800 | 2.71042400  | -0.55410900 |
| C | -2.47173900 | 2.88988600  | -1.02393300 |
| C | -3.31631600 | 3.95668000  | -0.68082900 |
| C | -2.96721000 | 1.87066500  | -1.85423700 |
| C | -4.61775900 | 3.99191900  | -1.18197300 |
| C | -4.26877600 | 1.92586400  | -2.34459600 |
| H | -2.32624900 | 1.03406400  | -2.11385600 |
| C | -5.10844600 | 2.99119800  | -2.02111600 |
| H | -6.11747900 | 3.04117200  | -2.41182500 |
| C | -4.78963900 | 0.77725500  | -3.16192000 |
| C | -5.55121800 | 5.08414400  | -0.72910300 |
| F | -3.83776200 | 0.25151100  | -3.96906400 |
| F | -5.83305200 | 1.12857500  | -3.93843600 |
| F | -5.21917700 | -0.24303500 | -2.36662200 |
| F | -4.89858800 | 6.21260800  | -0.39281500 |
| F | -6.26178700 | 4.69816800  | 0.36420600  |
| F | -6.45519700 | 5.40010600  | -1.68278500 |
| S | -0.41477100 | 5.27058100  | -0.01073100 |
| H | -2.95404200 | 4.74478800  | -0.03695000 |
| C | 1.36818200  | 0.57394700  | 3.22440500  |
| H | -0.84465100 | 1.73802500  | -0.61020600 |
| H | 1.06888300  | 2.01082900  | -0.18076600 |
| H | 1.19831600  | -0.19159200 | 2.16158200  |
| O | -1.52858200 | -1.47916300 | 0.19028600  |

|   |             |             |             |
|---|-------------|-------------|-------------|
| O | 0.61706800  | -2.25044900 | -1.09213700 |
| P | 0.05266100  | -1.15902800 | -0.02559300 |
| O | 0.13899900  | 0.25445500  | -0.49978400 |
| C | -3.06522600 | -5.28292100 | 1.09837700  |
| C | -2.55099400 | -5.01164200 | -0.16300200 |
| C | -2.13767700 | -3.71433300 | -0.50616400 |
| C | -2.68674500 | -2.95001700 | 1.74719600  |
| C | -3.17674900 | -4.24174300 | 2.01425700  |
| C | 0.17443200  | -2.12903800 | -2.42703500 |
| C | -1.06207700 | -2.67055900 | -2.76814500 |
| C | -1.59633500 | -2.41317300 | -4.04160300 |
| C | -0.86104300 | -1.71246000 | -4.98994000 |
| C | 0.42111200  | -1.27787700 | -4.66222000 |
| C | 0.96712200  | -1.45817400 | -3.37873200 |
| H | -3.63926500 | -4.42187700 | 2.97924800  |
| H | 1.02354400  | -0.76387300 | -5.40503600 |
| C | -1.96562100 | -3.64129600 | -2.02130100 |
| C | -1.56039100 | -5.12084800 | -2.32924600 |
| H | -1.73632200 | -5.39167600 | -3.37482200 |
| H | -0.49018900 | -5.24153500 | -2.12551700 |
| H | -3.69004800 | -2.27094500 | -4.61067700 |
| H | -2.99572900 | -3.88148500 | -4.80040600 |
| C | -2.09972200 | -2.73052700 | 0.48266300  |
| H | -3.40528700 | -6.28161100 | 1.35987900  |
| H | -1.27019300 | -1.51504000 | -5.97726600 |
| C | -2.38174200 | -5.96012000 | -1.32908600 |
| H | -3.35316300 | -6.25317200 | -1.75067800 |
| H | -1.87317400 | -6.88655700 | -1.03879600 |
| C | -2.99003000 | -2.98476800 | -4.16534800 |
| C | -3.34148600 | -3.32059200 | -2.70192600 |
| H | -4.05525600 | -4.14342600 | -2.60199000 |
| H | -3.78116200 | -2.43864300 | -2.22426000 |
| C | 2.36781100  | -0.97976200 | -3.15361300 |
| C | 3.42053700  | -1.92194400 | -3.04129500 |
| C | 2.65849100  | 0.40446600  | -3.23198400 |
| C | 3.20062500  | -3.33628300 | -3.02771000 |
| C | 4.78867100  | -1.45925000 | -2.97809000 |
| C | 4.03446000  | 0.84823200  | -3.22009700 |
| C | 4.24197500  | -4.22037800 | -2.91919800 |
| H | 2.18643400  | -3.71054600 | -3.10446000 |
| C | 5.84565800  | -2.41416300 | -2.85404500 |
| C | 5.05849900  | -0.09183200 | -3.07910200 |
| C | 5.58444400  | -3.75703200 | -2.82116500 |
| H | 4.04321000  | -5.28854300 | -2.90757000 |

|   |             |             |             |
|---|-------------|-------------|-------------|
| H | 6.86690000  | -2.04536000 | -2.79520600 |
| H | 6.09255100  | 0.24677300  | -3.06425500 |
| H | 6.39635000  | -4.47328600 | -2.73006800 |
| C | -2.89856200 | -1.90243900 | 2.79427600  |
| C | -3.71509600 | -0.77404200 | 2.51659000  |
| C | -2.41251500 | -2.11811400 | 4.11154100  |
| C | -4.31861000 | -0.53698000 | 1.23995700  |
| C | -4.00924600 | 0.17317200  | 3.57018900  |
| C | -2.77081800 | -1.19563500 | 5.16635700  |
| C | -5.09103800 | 0.57012800  | 1.00585800  |
| H | -4.17171200 | -1.25606500 | 0.44340200  |
| C | -4.79798200 | 1.33073600  | 3.27641100  |
| C | -3.54320600 | -0.07127000 | 4.86463200  |
| C | -5.31754400 | 1.53535900  | 2.02734000  |
| H | -5.53534100 | 0.70997500  | 0.02657600  |
| H | -4.98108700 | 2.04301200  | 4.07768000  |
| H | -3.79487500 | 0.62863800  | 5.65927600  |
| H | -5.89871700 | 2.42566300  | 1.80510800  |
| C | 1.95295400  | 2.73621900  | -3.46624900 |
| H | 1.15989800  | 3.47467400  | -3.54394500 |
| C | 1.63981800  | 1.40746000  | -3.33723300 |
| H | 0.60191400  | 1.09853900  | -3.30689100 |
| C | 3.31254400  | 3.16279700  | -3.49723200 |
| H | 3.54195500  | 4.21742900  | -3.62444600 |
| C | 4.31985400  | 2.24319700  | -3.36819200 |
| H | 5.36185900  | 2.55480500  | -3.38650200 |
| C | -1.11854900 | -3.40013700 | 5.74492200  |
| H | -0.45519900 | -4.23040400 | 5.97075500  |
| C | -1.51388200 | -2.51424400 | 6.78660300  |
| H | -1.16906800 | -2.68728100 | 7.80250000  |
| C | -2.30949000 | -1.43862600 | 6.49848800  |
| H | -2.60515400 | -0.74088300 | 7.27877000  |
| C | -1.54921400 | -3.21005600 | 4.45657600  |
| H | -1.20559200 | -3.87696700 | 3.67572100  |
| N | 0.96487100  | -1.37977200 | 1.33018000  |
| S | 1.53878200  | -2.78698400 | 1.94429200  |
| C | 2.93930100  | -3.32212500 | 0.78337100  |
| O | 0.57298000  | -3.88589300 | 1.88199200  |
| O | 2.21028300  | -2.44904500 | 3.20241300  |
| F | 3.89814500  | -3.88412200 | 1.52871300  |
| F | 2.49001100  | -4.21910100 | -0.09043600 |
| F | 3.44932100  | -2.27472200 | 0.13460400  |
| C | 0.21300800  | 0.06974100  | 4.08864000  |
| H | -0.75928500 | 0.21509700  | 3.61361300  |

|   |             |             |             |
|---|-------------|-------------|-------------|
| H | 0.34069400  | -0.99561400 | 4.27977700  |
| H | 0.19644000  | 0.58897400  | 5.05524700  |
| H | 2.33784100  | 0.14344600  | 3.48637700  |
| C | 0.20023000  | 2.77916400  | 3.01604300  |
| H | 0.30413000  | 3.77361800  | 2.58191400  |
| H | -0.68376000 | 2.28978700  | 2.59674500  |
| H | 0.00007900  | 2.89223200  | 4.09459000  |
| C | 4.47283500  | 3.95659700  | 1.34715000  |
| C | 5.04670700  | 4.48944900  | 0.17741200  |
| C | 5.03510300  | 4.35055200  | 2.57027100  |
| C | 6.11491200  | 5.38249400  | 0.22951800  |
| H | 4.67303800  | 4.19158300  | -0.79693500 |
| C | 6.11105200  | 5.24089000  | 2.62666600  |
| H | 4.65478700  | 3.96105000  | 3.50740200  |
| C | 6.65462500  | 5.76705400  | 1.45754400  |
| H | 6.52827000  | 5.77523700  | -0.69578900 |
| H | 6.51998700  | 5.52006200  | 3.59413500  |
| H | 7.48782800  | 6.46295600  | 1.50071200  |
| C | 3.75153700  | 1.64384000  | 0.52530500  |
| H | 3.93479300  | 1.88483400  | -0.52834500 |
| H | 2.91155200  | 0.93951700  | 0.53296000  |
| C | 4.98432000  | 0.93898000  | 1.08542600  |
| C | 4.83359200  | -0.12345500 | 1.89512200  |
| H | 3.82019100  | -0.44530600 | 2.12039200  |
| C | 6.34004100  | 1.42964600  | 0.62146800  |
| H | 7.11408200  | 0.66940000  | 0.75399900  |
| H | 6.30965500  | 1.68847900  | -0.44364600 |
| H | 6.66532100  | 2.32985800  | 1.15384500  |
| C | 5.88790800  | -0.98686500 | 2.52811200  |
| H | 5.72591100  | -2.03751300 | 2.25654200  |
| H | 6.90728800  | -0.71063100 | 2.24736300  |
| H | 5.82082100  | -0.93924100 | 3.62366400  |

TS-1-1-6SR-1

l imaginary frequency

H = -5393.913932

G = -5394.117082

E(M06-2X-DCM) = -5394.843681

|   |            |            |            |
|---|------------|------------|------------|
| C | 3.17183800 | 2.95992800 | 1.29391200 |
| C | 2.44157100 | 2.86535900 | 2.68300900 |
| H | 3.15307300 | 2.44325600 | 3.39610600 |
| H | 2.23102600 | 3.89484000 | 2.99430500 |
| C | 1.14925900 | 2.10576300 | 2.84370200 |
| C | 2.22763800 | 3.65623700 | 0.27046800 |

|   |              |              |              |
|---|--------------|--------------|--------------|
| H | 2. 76162100  | 3. 78222900  | -0. 67834700 |
| H | 1. 97715600  | 4. 65753100  | 0. 62567300  |
| N | 0. 97483800  | 2. 95649900  | 0. 02839100  |
| C | -0. 18404000 | 3. 59816500  | -0. 33607500 |
| N | -1. 14978200 | 2. 70441900  | -0. 72515600 |
| C | -2. 45717700 | 2. 87543500  | -1. 20306900 |
| C | -3. 30055400 | 3. 95227300  | -0. 89081700 |
| C | -2. 95412000 | 1. 83029800  | -1. 99951800 |
| C | -4. 60562900 | 3. 96752300  | -1. 38362700 |
| C | -4. 25817500 | 1. 86716000  | -2. 48469700 |
| H | -2. 31239300 | 0. 98722100  | -2. 23534300 |
| C | -5. 09881000 | 2. 93949300  | -2. 18801600 |
| H | -6. 11069600 | 2. 97464300  | -2. 57293400 |
| C | -4. 77747300 | 0. 69301900  | -3. 26668800 |
| C | -5. 54133000 | 5. 06769400  | -0. 95520200 |
| F | -3. 82946800 | 0. 15644500  | -4. 07122000 |
| F | -5. 83293200 | 1. 01495000  | -4. 03939100 |
| F | -5. 18732600 | -0. 31132500 | -2. 44139700 |
| F | -4. 89171600 | 6. 20752000  | -0. 65277400 |
| F | -6. 24337300 | 4. 70721900  | 0. 15209100  |
| F | -6. 45201400 | 5. 35419500  | -1. 91164400 |
| S | -0. 37353100 | 5. 27253000  | -0. 27444400 |
| H | -2. 93582600 | 4. 76166900  | -0. 27501600 |
| C | 1. 13075300  | 0. 75717000  | 3. 23179000  |
| H | -0. 84720500 | 1. 72555800  | -0. 73446200 |
| H | 1. 04022200  | 1. 97406500  | -0. 23634900 |
| H | 1. 02657800  | -0. 05419000 | 2. 19621600  |
| O | -1. 56715700 | -1. 50616100 | 0. 20232200  |
| O | 0. 63020000  | -2. 28519800 | -0. 99010900 |
| P | 0. 01065500  | -1. 15867000 | 0. 00842200  |
| O | 0. 07608400  | 0. 23002100  | -0. 53742800 |
| C | -3. 06565300 | -5. 30951800 | 1. 17461200  |
| C | -2. 53342600 | -5. 05937900 | -0. 08384500 |
| C | -2. 12589600 | -3. 76585500 | -0. 44580200 |
| C | -2. 72577300 | -2. 95774700 | 1. 77837200  |
| C | -3. 20301700 | -4. 25048200 | 2. 06583100  |
| C | 0. 22700200  | -2. 21442400 | -2. 34255000 |
| C | -1. 00254800 | -2. 76244300 | -2. 70074100 |
| C | -1. 50630100 | -2. 53488400 | -3. 99220900 |
| C | -0. 74562900 | -1. 86303400 | -4. 94126500 |
| C | 0. 53258100  | -1. 43136300 | -4. 59591500 |
| C | 1. 04717600  | -1. 57960300 | -3. 29527000 |
| H | -3. 67961600 | -4. 41535000 | 3. 02663900  |
| H | 1. 15706900  | -0. 94396100 | -5. 33841800 |



|   |             |             |             |
|---|-------------|-------------|-------------|
| C | -1.92376700 | -3.71883200 | -1.95704600 |
| C | -1.50965100 | -5.20289800 | -2.23231900 |
| H | -1.66959000 | -5.49282300 | -3.27531300 |
| H | -0.44203500 | -5.31631600 | -2.01180500 |
| H | -3.58706200 | -2.39175000 | -4.60553300 |
| H | -2.89858200 | -4.00909600 | -4.75410900 |
| C | -2.11932000 | -2.75898800 | 0.51992600  |
| H | -3.40081400 | -6.30569800 | 1.45151800  |
| H | -1.13100100 | -1.68814900 | -5.94231200 |
| C | -2.34154300 | -6.02805400 | -1.22936800 |
| H | -3.30556100 | -6.33296500 | -1.65956600 |
| H | -1.83325100 | -6.94686100 | -0.91531800 |
| C | -2.90032100 | -3.10192300 | -4.13414300 |
| C | -3.28402700 | -3.41036300 | -2.67264000 |
| H | -4.00022200 | -4.23120600 | -2.57296700 |
| H | -3.73344200 | -2.51952800 | -2.22087100 |
| C | 2.45059000  | -1.11306700 | -3.06144600 |
| C | 3.49040300  | -2.06675300 | -2.92486100 |
| C | 2.75979800  | 0.26458100  | -3.17427000 |
| C | 3.25146000  | -3.47723300 | -2.87402200 |
| C | 4.86553000  | -1.62208900 | -2.88571900 |
| C | 4.14147700  | 0.68999700  | -3.17554300 |
| C | 4.28159900  | -4.37296600 | -2.75468300 |
| H | 2.23137100  | -3.83897800 | -2.93053700 |
| C | 5.91064100  | -2.58861100 | -2.75009500 |
| C | 5.15318100  | -0.26169400 | -3.02384400 |
| C | 5.63127200  | -3.92655100 | -2.68222900 |
| H | 4.06826900  | -5.43760100 | -2.71423300 |
| H | 6.93776700  | -2.23313100 | -2.71311600 |
| H | 6.19210000  | 0.06187600  | -3.03007000 |
| H | 6.43409700  | -4.65184100 | -2.58270100 |
| C | -2.97518100 | -1.89184600 | 2.79795500  |
| C | -3.79570100 | -0.77692500 | 2.47999700  |
| C | -2.51893800 | -2.07880700 | 4.13016200  |
| C | -4.36004300 | -0.56090300 | 1.18175700  |
| C | -4.13125700 | 0.18129500  | 3.51132800  |
| C | -2.92352200 | -1.14995800 | 5.16214600  |
| C | -5.12713900 | 0.54053100  | 0.90667800  |
| H | -4.18431200 | -1.28967000 | 0.40015900  |
| C | -4.91596700 | 1.33058200  | 3.17630100  |
| C | -3.70480400 | -0.04237400 | 4.82312800  |
| C | -5.39157400 | 1.51810300  | 1.90712100  |
| H | -5.53811900 | 0.66589700  | -0.08896000 |
| H | -5.12998100 | 2.05166100  | 3.96190600  |

|   |             |             |             |
|---|-------------|-------------|-------------|
| H | -3.99000800 | 0.66388300  | 5.60064200  |
| H | -5.96673000 | 2.40398500  | 1.65303700  |
| C | 2.08460700  | 2.59849400  | -3.46693500 |
| H | 1.30146900  | 3.34510000  | -3.56475100 |
| C | 1.75402900  | 1.27710400  | -3.30800500 |
| H | 0.71239100  | 0.98156300  | -3.27311300 |
| C | 3.44951900  | 3.00741500  | -3.50044800 |
| H | 3.69270100  | 4.05649900  | -3.64544800 |
| C | 4.44485700  | 2.07787100  | -3.35083800 |
| H | 5.49073500  | 2.37592700  | -3.37531600 |
| C | -1.23579600 | -3.30725700 | 5.81218800  |
| H | -0.55663800 | -4.11646000 | 6.06552600  |
| C | -1.68054200 | -2.41902800 | 6.83168900  |
| H | -1.35812500 | -2.57087900 | 7.85824300  |
| C | -2.49348300 | -1.36636300 | 6.50916200  |
| H | -2.82474200 | -0.66556900 | 7.27220100  |
| C | -1.63847600 | -3.14468800 | 4.51114600  |
| H | -1.25838900 | -3.81273200 | 3.74791200  |
| N | 0.87640400  | -1.27940700 | 1.40609400  |
| S | 1.51637000  | -2.62169300 | 2.09321400  |
| C | 3.05560100  | -3.01764500 | 1.06855300  |
| O | 0.65841700  | -3.80125600 | 1.96546800  |
| O | 2.04642900  | -2.21652200 | 3.39835300  |
| F | 3.97485200  | -3.53429900 | 1.88746900  |
| F | 2.76230300  | -3.90740800 | 0.12506100  |
| F | 3.54486500  | -1.90833600 | 0.50598100  |
| C | -0.04329800 | 0.23936900  | 4.06438500  |
| H | -0.99650900 | 0.31988500  | 3.53838100  |
| H | 0.12309100  | -0.80951100 | 4.30782100  |
| H | -0.12784700 | 0.79955700  | 5.00407200  |
| H | 2.10207500  | 0.37687000  | 3.55549700  |
| C | -0.12040700 | 2.89524300  | 2.85927100  |
| H | -0.03368100 | 3.86526800  | 2.36880400  |
| H | -0.95812500 | 2.33916900  | 2.42801500  |
| H | -0.38409900 | 3.06648800  | 3.91641700  |
| C | 4.40106100  | 3.88863400  | 1.42032100  |
| C | 5.17026800  | 4.16191100  | 0.27411000  |
| C | 4.79977800  | 4.49620800  | 2.61900100  |
| C | 6.27428000  | 5.00961000  | 0.32278100  |
| H | 4.91142300  | 3.70217300  | -0.67440800 |
| C | 5.91040400  | 5.34358600  | 2.67322800  |
| H | 4.25413700  | 4.32208800  | 3.53949700  |
| C | 6.65219000  | 5.60846400  | 1.52570700  |
| H | 6.84229500  | 5.20036000  | -0.58411400 |

|   |            |             |             |
|---|------------|-------------|-------------|
| H | 6.18794000 | 5.79675400  | 3.62128300  |
| H | 7.51312800 | 6.27004900  | 1.56586800  |
| C | 3.61465000 | 1.54648500  | 0.75960200  |
| H | 3.72276400 | 1.63695700  | -0.32599500 |
| H | 2.78885800 | 0.84060400  | 0.91373900  |
| C | 4.90257100 | 0.93129000  | 1.29766900  |
| C | 5.95343500 | 0.81226000  | 0.46980200  |
| H | 5.82958200 | 1.18654600  | -0.54542800 |
| C | 4.91565500 | 0.42550300  | 2.72081400  |
| H | 5.83164100 | -0.12027000 | 2.95638100  |
| H | 4.84239800 | 1.24326400  | 3.44993600  |
| H | 4.07976900 | -0.25972300 | 2.90758600  |
| C | 7.30840900 | 0.22073900  | 0.73631500  |
| H | 8.09405800 | 0.97212100  | 0.57622100  |
| H | 7.42756800 | -0.16843400 | 1.75033100  |
| H | 7.51361000 | -0.60195900 | 0.03745800  |

TS-1-1-6RS

1 imaginary frequency

H = -5393.907544

G = -5394.113649

E(M06-2X-DCM) = -5394.840969

|   |             |             |             |
|---|-------------|-------------|-------------|
| C | -4.08598800 | -0.87157600 | 1.93790100  |
| C | -3.24015900 | -2.04254400 | 2.59823700  |
| H | -3.52179400 | -2.96685600 | 2.08977700  |
| H | -3.62547800 | -2.13737500 | 3.63003600  |
| C | -1.76642300 | -2.08751200 | 2.86253900  |
| C | -3.65095000 | 0.54398900  | 2.37625700  |
| H | -4.42339600 | 1.25314100  | 2.07587000  |
| H | -3.60316100 | 0.60679700  | 3.47238000  |
| N | -2.40537600 | 1.00187400  | 1.78516900  |
| C | -2.09804600 | 2.32073300  | 1.64112600  |
| N | -0.94070200 | 2.50633300  | 0.91846700  |
| C | -0.41232600 | 3.68662400  | 0.36385000  |
| C | -0.42343600 | 4.92890400  | 1.01117300  |
| C | 0.19716200  | 3.57654900  | -0.89762900 |
| C | 0.14648400  | 6.04030100  | 0.38635300  |
| C | 0.76326400  | 4.69531500  | -1.50167500 |
| H | 0.20140500  | 2.61999700  | -1.40985700 |
| C | 0.73950300  | 5.94026900  | -0.86927200 |
| H | 1.17820800  | 6.81057100  | -1.34366300 |
| C | 1.39583200  | 4.60012000  | -2.86200500 |
| C | 0.07339200  | 7.38149800  | 1.07046100  |
| F | 1.29792700  | 3.35812100  | -3.39577000 |

|   |             |             |             |
|---|-------------|-------------|-------------|
| F | 0.82558900  | 5.45299500  | -3.74065700 |
| F | 2.71587200  | 4.91236000  | -2.82501700 |
| F | 1.08438200  | 8.19409300  | 0.68608300  |
| F | -1.07947500 | 8.02528000  | 0.78349600  |
| F | 0.13683800  | 7.26381100  | 2.41433900  |
| S | -3.06681200 | 3.54928300  | 2.27162000  |
| H | -0.87866500 | 5.02620800  | 1.98588300  |
| C | -1.02604100 | -3.21431600 | 2.44508200  |
| H | -0.48270800 | 1.64750200  | 0.60531700  |
| H | -1.63698900 | -4.02070400 | 2.02969200  |
| H | -1.75076200 | 0.32985300  | 1.39256500  |
| H | -0.47325800 | -2.82229100 | 1.38518200  |
| O | 2.49618400  | -1.15613100 | 0.16156700  |
| O | 0.69150700  | -0.52974800 | -1.61199900 |
| P | 0.89257700  | -1.11801300 | -0.10617000 |
| O | 0.10212000  | -0.21171700 | 0.78860000  |
| C | 4.72089600  | 2.38392800  | -0.03951700 |
| C | 4.40567800  | 1.68255400  | -1.19876600 |
| C | 3.71950500  | 0.45879500  | -1.13313100 |
| C | 3.65336400  | 0.64183700  | 1.30344600  |
| C | 4.37494100  | 1.84198500  | 1.19858900  |
| C | 1.20505500  | -1.14156700 | -2.77024500 |
| C | 2.57375300  | -1.10539800 | -3.02680600 |
| C | 3.08998600  | -1.92766500 | -4.04116600 |
| C | 2.24002500  | -2.63719800 | -4.88119200 |
| C | 0.86191700  | -2.49807300 | -4.72190800 |
| C | 0.30965200  | -1.75941000 | -3.66346100 |
| H | 4.66341800  | 2.35132300  | 2.11347600  |
| H | 0.18380600  | -2.98667400 | -5.41515700 |
| C | 3.69013800  | -0.20250600 | -2.50535000 |
| C | 3.82216600  | 1.06236700  | -3.42416600 |
| H | 4.22025900  | 0.81611900  | -4.41262900 |
| H | 2.83124400  | 1.50297300  | -3.56545800 |
| H | 4.99280800  | -1.34674100 | -4.91505800 |
| H | 5.04290400  | -2.88974200 | -4.06930400 |
| C | 3.28367900  | 0.00068400  | 0.10563700  |
| H | 5.24998600  | 3.33186300  | -0.09152400 |
| H | 2.63770900  | -3.26956900 | -5.67072700 |
| C | 4.70826800  | 2.04756100  | -2.63428500 |
| H | 4.46973100  | 3.09222000  | -2.85695800 |
| H | 5.77439300  | 1.90501700  | -2.85975100 |
| C | 4.60368300  | -1.88613900 | -4.04058200 |
| C | 4.92289200  | -1.13930700 | -2.72547400 |
| H | 4.97371500  | -1.85470100 | -1.89710600 |

|   |             |             |             |
|---|-------------|-------------|-------------|
| H | 5.86697000  | -0.58605400 | -2.75634800 |
| C | -1.17715100 | -1.58044600 | -3.60829900 |
| C | -2.03009400 | -2.68113500 | -3.35029100 |
| C | -1.72805400 | -0.32067900 | -3.96059000 |
| C | -1.53396100 | -3.97460000 | -2.98608500 |
| C | -3.46324300 | -2.51392600 | -3.44514700 |
| C | -3.16211400 | -0.17645300 | -4.07375300 |
| C | -2.38659600 | -5.01569500 | -2.72338400 |
| H | -0.46458100 | -4.12233400 | -2.90295700 |
| C | -4.31651500 | -3.62798700 | -3.16726500 |
| C | -3.98789000 | -1.27300700 | -3.81272300 |
| C | -3.79747500 | -4.84488200 | -2.81483800 |
| H | -1.97907100 | -5.98034100 | -2.43407400 |
| H | -5.39153600 | -3.48275100 | -3.24586800 |
| H | -5.06594200 | -1.15615600 | -3.89633600 |
| H | -4.45674300 | -5.68369800 | -2.60668500 |
| C | 3.40544100  | 0.04776200  | 2.65586800  |
| C | 2.49631700  | 0.65151200  | 3.55680900  |
| C | 4.17287400  | -1.07313800 | 3.06177800  |
| C | 1.70678400  | 1.79581400  | 3.21120600  |
| C | 2.34114200  | 0.10696400  | 4.88836600  |
| C | 3.98896900  | -1.62253000 | 4.38630700  |
| C | 0.84870000  | 2.37052300  | 4.11282800  |
| H | 1.79422500  | 2.20688500  | 2.21252700  |
| C | 1.43594600  | 0.73805100  | 5.79932700  |
| C | 3.07896300  | -1.02028000 | 5.26028500  |
| C | 0.71298100  | 1.84003900  | 5.42799100  |
| H | 0.25815800  | 3.23461300  | 3.82361000  |
| H | 1.34263600  | 0.32389400  | 6.80087900  |
| H | 2.95709500  | -1.42779900 | 6.26216100  |
| H | 0.03335100  | 2.31514400  | 6.13010300  |
| C | -1.49315000 | 2.03050000  | -4.60316100 |
| H | -0.85589600 | 2.88709600  | -4.80086800 |
| C | -0.92758100 | 0.83292200  | -4.24744200 |
| H | 0.15148000  | 0.75164600  | -4.18932800 |
| C | -2.90595100 | 2.16231700  | -4.71640100 |
| H | -3.33673400 | 3.11659500  | -5.00675400 |
| C | -3.71159900 | 1.08583500  | -4.46231500 |
| H | -4.79243500 | 1.16851700  | -4.54986400 |
| C | 5.89147200  | -2.76230200 | 2.65050000  |
| H | 6.63765200  | -3.20175600 | 1.99409500  |
| C | 5.68457600  | -3.31675200 | 3.94534900  |
| H | 6.26820000  | -4.17646500 | 4.26283300  |
| C | 4.76078100  | -2.75831500 | 4.78628900  |

|   |              |              |              |
|---|--------------|--------------|--------------|
| H | 4. 60196300  | -3. 16232800 | 5. 78341500  |
| C | 5. 16329200  | -1. 68223900 | 2. 22534900  |
| H | 5. 33990800  | -1. 27267200 | 1. 23765700  |
| N | 0. 45885900  | -2. 68094900 | 0. 13992500  |
| S | 1. 14754100  | -4. 08060800 | -0. 33746300 |
| C | 2. 81740400  | -4. 23930000 | 0. 53792700  |
| O | 0. 33465700  | -5. 15565400 | 0. 23928500  |
| O | 1. 51662300  | -4. 10376300 | -1. 75432700 |
| F | 3. 10939400  | -5. 54077800 | 0. 61690700  |
| F | 2. 76774200  | -3. 73157900 | 1. 77352000  |
| F | 3. 78014100  | -3. 62558700 | -0. 15243300 |
| C | -1. 11901700 | -1. 07158500 | 3. 74097300  |
| H | -0. 24827400 | -0. 63859900 | 3. 23412200  |
| H | -1. 78381300 | -0. 26664900 | 4. 04501300  |
| H | -0. 73152400 | -1. 57206400 | 4. 63836800  |
| C | 0. 14701800  | -3. 71146500 | 3. 29484800  |
| H | -0. 21290100 | -4. 01981900 | 4. 28481400  |
| H | 0. 59745600  | -4. 57830400 | 2. 81233800  |
| H | 0. 92192600  | -2. 95453100 | 3. 43113300  |
| C | -5. 53108300 | -1. 13796900 | 2. 44040100  |
| C | -6. 15347900 | -2. 36617800 | 2. 15131600  |
| C | -6. 25145500 | -0. 22359500 | 3. 22306700  |
| C | -7. 43268900 | -2. 66599800 | 2. 61524200  |
| H | -5. 64301300 | -3. 10747500 | 1. 54329400  |
| C | -7. 53556600 | -0. 52036000 | 3. 68931000  |
| H | -5. 83190700 | 0. 74068100  | 3. 48413400  |
| C | -8. 13415000 | -1. 74117700 | 3. 39009600  |
| H | -7. 88105100 | -3. 62427400 | 2. 36640900  |
| H | -8. 06408300 | 0. 21534200  | 4. 28959800  |
| H | -9. 13234800 | -1. 97028300 | 3. 75270000  |
| C | -4. 02426500 | -1. 02882300 | 0. 37521200  |
| H | -4. 29408200 | -2. 06256600 | 0. 13768200  |
| H | -2. 98128800 | -0. 91656700 | 0. 05289300  |
| C | -4. 91387100 | -0. 09324200 | -0. 43781200 |
| C | -6. 13358700 | -0. 51655300 | -0. 81153000 |
| H | -6. 43444100 | -1. 51866700 | -0. 50724000 |
| C | -4. 34550200 | 1. 25366300  | -0. 82391600 |
| H | -4. 36462100 | 1. 97715800  | -0. 00000100 |
| H | -3. 30072200 | 1. 15552300  | -1. 13925400 |
| H | -4. 88945600 | 1. 70306800  | -1. 65717600 |
| C | -7. 18220200 | 0. 22602700  | -1. 59040500 |
| H | -7. 48201000 | -0. 33877500 | -2. 48439000 |
| H | -8. 09109500 | 0. 35052600  | -0. 98554400 |
| H | -6. 86275600 | 1. 22083700  | -1. 91006900 |

TS-1-1-6RS-1

1 imaginary frequency

H = -5393.908095

G = -5394.114314

E(M06-2X-DCM) = -5394.840316

|   |             |             |             |
|---|-------------|-------------|-------------|
| C | 3.96048100  | -1.73155500 | -1.62805700 |
| C | 2.89743700  | -2.84307900 | -2.02633300 |
| H | 2.93211800  | -3.62150400 | -1.25965100 |
| H | 3.29569900  | -3.32642800 | -2.93986100 |
| C | 1.47422500  | -2.69480700 | -2.46752600 |
| C | 3.74129900  | -0.34187200 | -2.26755600 |
| H | 4.60772900  | 0.27775500  | -2.03269600 |
| H | 3.70832200  | -0.41917300 | -3.36270900 |
| N | 2.58091800  | 0.37355300  | -1.76562400 |
| C | 2.52255500  | 1.73252100  | -1.68912100 |
| N | 1.40665400  | 2.16229000  | -1.00434000 |
| C | 1.08245500  | 3.45455900  | -0.54942200 |
| C | 1.29079000  | 4.61918200  | -1.29930800 |
| C | 0.47451400  | 3.55132700  | 0.71333700  |
| C | 0.91417100  | 5.85723600  | -0.77472700 |
| C | 0.10252600  | 4.79461500  | 1.21739800  |
| H | 0.31752300  | 2.65427000  | 1.30326800  |
| C | 0.32264500  | 5.96082000  | 0.48158800  |
| H | 0.03329900  | 6.92765000  | 0.87727600  |
| C | -0.51507000 | 4.92103600  | 2.58209100  |
| C | 1.19680000  | 7.10669400  | -1.56899200 |
| F | -0.67465100 | 3.72265400  | 3.19464200  |
| F | 0.23681500  | 5.68538600  | 3.40415900  |
| F | -1.73859900 | 5.50499500  | 2.52734400  |
| F | 0.32492800  | 8.09676400  | -1.26895600 |
| F | 2.43581400  | 7.58563700  | -1.32096700 |
| F | 1.11685300  | 6.88567000  | -2.89880900 |
| S | 3.70751000  | 2.73696000  | -2.34478300 |
| H | 1.74705500  | 4.55815200  | -2.27651400 |
| C | 0.53183900  | -3.63912900 | -2.00413400 |
| H | 0.79669500  | 1.42014900  | -0.65470300 |
| H | 0.97117700  | -4.46431000 | -1.43540900 |
| H | 1.79670900  | -0.14139300 | -1.37290700 |
| H | -0.01676200 | -3.03741200 | -1.04970600 |
| O | -2.66580100 | -0.71392000 | -0.17526100 |
| O | -0.82156600 | -0.27212000 | 1.61084600  |
| P | -1.09472500 | -0.96238500 | 0.16023600  |
| O | -0.11454100 | -0.32551200 | -0.77800800 |

|   |             |             |             |
|---|-------------|-------------|-------------|
| C | -4.15866800 | 3.18965200  | -0.37758400 |
| C | -4.02103400 | 2.55049600  | 0.85050900  |
| C | -3.58461000 | 1.21746100  | 0.92097400  |
| C | -3.40890000 | 1.16123800  | -1.51759100 |
| C | -3.88575000 | 2.48153500  | -1.54845000 |
| C | -1.47173200 | -0.67487000 | 2.79121300  |
| C | -2.81201100 | -0.35336400 | 2.98950400  |
| C | -3.50230000 | -0.97241500 | 4.04399600  |
| C | -2.82736000 | -1.76017200 | 4.96895000  |
| C | -1.44570100 | -1.90977900 | 4.85071600  |
| C | -0.73680000 | -1.38464900 | 3.75935100  |
| H | -4.04018000 | 2.95159200  | -2.51536300 |
| H | -0.89361500 | -2.46504300 | 5.60323500  |
| C | -3.72184600 | 0.69111800  | 2.34475200  |
| C | -3.63774100 | 2.03711800  | 3.14635400  |
| H | -4.10906800 | 1.96268700  | 4.13051000  |
| H | -2.58600200 | 2.29261900  | 3.30090000  |
| H | -5.28104600 | 0.03516200  | 4.78219000  |
| H | -5.60321600 | -1.54217700 | 4.06974200  |
| C | -3.21074800 | 0.57338500  | -0.25370600 |
| H | -4.49512200 | 4.22177500  | -0.43054100 |
| H | -3.35979300 | -2.23550700 | 5.78869100  |
| C | -4.28967200 | 3.09703100  | 2.23424200  |
| H | -3.85767400 | 4.09215300  | 2.38050600  |
| H | -5.36938400 | 3.18408300  | 2.41971700  |
| C | -4.97949800 | -0.64619900 | 3.97478700  |
| C | -5.11483300 | 0.02311600  | 2.58779600  |
| H | -5.27575200 | -0.74387300 | 1.82185000  |
| H | -5.93825900 | 0.74213400  | 2.52906100  |
| C | 0.75674300  | -1.50992600 | 3.73119500  |
| C | 1.37828700  | -2.76541100 | 3.52907400  |
| C | 1.54214100  | -0.36820000 | 4.03588700  |
| C | 0.63808800  | -3.95382000 | 3.22763800  |
| C | 2.81799200  | -2.87459900 | 3.61814300  |
| C | 2.97687600  | -0.49931800 | 4.14852900  |
| C | 1.26993500  | -5.15106000 | 3.01113400  |
| H | -0.44109700 | -3.89602400 | 3.16069600  |
| C | 3.43643900  | -4.14521600 | 3.39275400  |
| C | 3.57495900  | -1.74353900 | 3.93150600  |
| C | 2.68823100  | -5.25246300 | 3.09436800  |
| H | 0.68004600  | -6.02970500 | 2.76628300  |
| H | 4.51960100  | -4.20988800 | 3.47093700  |
| H | 4.65639700  | -1.83239000 | 4.01142100  |
| H | 3.17064400  | -6.21203800 | 2.92663800  |



|   |             |             |             |
|---|-------------|-------------|-------------|
| C | -3.23345000 | 0.40597900  | -2.79950400 |
| C | -2.18211900 | 0.72407000  | -3.69169500 |
| C | -4.19435700 | -0.57510500 | -3.15135900 |
| C | -1.19450600 | 1.72081000  | -3.40321900 |
| C | -2.08046200 | 0.02537900  | -4.95474900 |
| C | -4.06675500 | -1.28250200 | -4.40555900 |
| C | -0.19833300 | 2.01931500  | -4.29658300 |
| H | -1.24252600 | 2.24311100  | -2.45514000 |
| C | -1.02576200 | 0.36774700  | -5.85912300 |
| C | -3.01409400 | -0.96593700 | -5.26927700 |
| C | -0.11264800 | 1.33847600  | -5.54504200 |
| H | 0.54111000  | 2.77580900  | -4.05161000 |
| H | -0.97301900 | -0.15827400 | -6.80984000 |
| H | -2.93163200 | -1.49070900 | -6.21928100 |
| H | 0.68017700  | 1.59539000  | -6.24221100 |
| C | 1.76428200  | 2.00595400  | 4.58965000  |
| H | 1.30520000  | 2.97654600  | 4.75116100  |
| C | 0.97850900  | 0.92777900  | 4.27266100  |
| H | -0.09602600 | 1.05285700  | 4.20844300  |
| C | 3.17580000  | 1.86584800  | 4.70846600  |
| H | 3.78249500  | 2.72786900  | 4.97234300  |
| C | 3.75964900  | 0.64639100  | 4.49399000  |
| H | 4.83611200  | 0.52308600  | 4.58373600  |
| C | -6.23607700 | -1.84104600 | -2.69874200 |
| H | -7.08406300 | -2.05545500 | -2.05399700 |
| C | -6.08851800 | -2.55459000 | -3.92183900 |
| H | -6.81951100 | -3.31010200 | -4.19640900 |
| C | -5.03423800 | -2.27816900 | -4.74921500 |
| H | -4.91620800 | -2.80534500 | -5.69308000 |
| C | -5.32381700 | -0.88812900 | -2.32811200 |
| H | -5.45733700 | -0.35330000 | -1.39500400 |
| N | -0.97593000 | -2.59540400 | 0.09512400  |
| S | -1.96727100 | -3.77370800 | 0.63136100  |
| C | -3.56172700 | -3.69001900 | -0.38463100 |
| O | -1.35109700 | -5.04322000 | 0.23244300  |
| O | -2.43509900 | -3.57524500 | 2.00473100  |
| F | -4.08851900 | -4.91748700 | -0.41580500 |
| F | -3.31561200 | -3.29305100 | -1.63753000 |
| F | -4.44168400 | -2.85999000 | 0.17746200  |
| C | 1.07415500  | -1.73039200 | -3.53176600 |
| H | 0.28536800  | -1.07052300 | -3.14833500 |
| H | 1.89119200  | -1.11550800 | -3.89915900 |
| H | 0.63098100  | -2.27980700 | -4.37141100 |
| C | -0.63491700 | -4.06421300 | -2.89817800 |

|   |             |             |             |
|---|-------------|-------------|-------------|
| H | -0.25653600 | -4.55777400 | -3.80268400 |
| H | -1.25841300 | -4.77698100 | -2.35840600 |
| H | -1.26234800 | -3.22370400 | -3.20174200 |
| C | 5.31527700  | -2.30891500 | -2.11650800 |
| C | 5.72132600  | -3.58345800 | -1.67907000 |
| C | 6.16580000  | -1.63184100 | -3.00322800 |
| C | 6.92066600  | -4.15302500 | -2.10103800 |
| H | 5.10252600  | -4.14293800 | -0.98343800 |
| C | 7.37087800  | -2.20029400 | -3.42709000 |
| H | 5.91320200  | -0.64590900 | -3.37475500 |
| C | 7.75591800  | -3.46190600 | -2.98029700 |
| H | 7.20376400  | -5.13697400 | -1.73649200 |
| H | 8.00722300  | -1.64495200 | -4.11090800 |
| H | 8.69333100  | -3.90126800 | -3.30972900 |
| C | 3.96532300  | -1.59421400 | -0.05858700 |
| H | 4.07609900  | -2.59898200 | 0.36777300  |
| H | 2.97482900  | -1.24524200 | 0.25356400  |
| C | 5.03218400  | -0.67750400 | 0.52939000  |
| C | 4.71372900  | 0.58658300  | 0.85518200  |
| H | 3.68320000  | 0.89975300  | 0.69767700  |
| C | 6.40675400  | -1.27115300 | 0.75555300  |
| H | 6.32548500  | -2.27932100 | 1.18209800  |
| H | 6.98087300  | -1.37135800 | -0.17228600 |
| H | 7.00146200  | -0.66799600 | 1.44614900  |
| C | 5.60318100  | 1.67209200  | 1.38860100  |
| H | 5.64772100  | 2.49858600  | 0.66680900  |
| H | 5.19098400  | 2.08584100  | 2.31729700  |
| H | 6.62768900  | 1.34360800  | 1.58306400  |

TS-1-1-6RS-2

1 imaginary frequency

H = -5393.904901

G = -5394.110646

E(M06-2X-DCM) = -5394.837003

|   |             |            |            |
|---|-------------|------------|------------|
| C | -3.79435700 | 2.02884300 | 1.70029900 |
| C | -3.53465500 | 0.98070700 | 2.86033600 |
| H | -4.33473400 | 0.24389000 | 2.81514800 |
| H | -3.66871100 | 1.53981100 | 3.80008400 |
| C | -2.24816500 | 0.24403500 | 3.09256400 |
| C | -2.65816600 | 3.06378000 | 1.53755100 |
| H | -3.00239300 | 3.82898600 | 0.83932900 |
| H | -2.48599500 | 3.58457300 | 2.48885100 |
| N | -1.38806900 | 2.57925100 | 1.01794700 |
| C | -0.38920600 | 3.44993500 | 0.69379100 |

|   |              |              |              |
|---|--------------|--------------|--------------|
| N | 0. 73597700  | 2. 81245100  | 0. 22667100  |
| C | 1. 92943500  | 3. 34215900  | -0. 28786100 |
| C | 2. 50971400  | 4. 54608700  | 0. 14016300  |
| C | 2. 59797700  | 2. 57097500  | -1. 25371300 |
| C | 3. 71732600  | 4. 96967500  | -0. 41619500 |
| C | 3. 80465700  | 3. 01060100  | -1. 79429500 |
| H | 2. 14964300  | 1. 64556700  | -1. 59987500 |
| C | 4. 37498100  | 4. 21728000  | -1. 38712800 |
| H | 5. 30847100  | 4. 56126700  | -1. 81529200 |
| C | 4. 52654400  | 2. 16395900  | -2. 80482600 |
| C | 4. 29188500  | 6. 29535000  | 0. 01323400  |
| F | 3. 67584700  | 1. 38022500  | -3. 51699500 |
| F | 5. 21885600  | 2. 90935000  | -3. 69008400 |
| F | 5. 42050000  | 1. 32679000  | -2. 21882500 |
| F | 5. 63413300  | 6. 33586600  | -0. 15112300 |
| F | 3. 77688500  | 7. 31861200  | -0. 70372000 |
| F | 4. 03551800  | 6. 55558400  | 1. 31370300  |
| S | -0. 57595800 | 5. 11942400  | 0. 85965200  |
| H | 2. 01470200  | 5. 14504300  | 0. 89046400  |
| C | -2. 20846000 | -1. 16022500 | 2. 98788100  |
| H | 0. 67042000  | 1. 79263300  | 0. 17587100  |
| H | -3. 19067700 | -1. 62759800 | 2. 87761500  |
| H | -1. 21906300 | 1. 58840200  | 0. 86965400  |
| H | -1. 78211000 | -1. 38483900 | 1. 81463300  |
| O | 1. 33408200  | -2. 33963100 | 0. 45108700  |
| O | 0. 30063900  | -0. 99417500 | -1. 52819900 |
| P | 0. 15564200  | -1. 28875000 | 0. 06273300  |
| O | 0. 23344100  | 0. 04601700  | 0. 73755200  |
| C | 5. 33839900  | -1. 23991000 | -0. 12520400 |
| C | 4. 58686900  | -1. 74839000 | -1. 17830200 |
| C | 3. 26444900  | -2. 17878600 | -0. 97746400 |
| C | 3. 43871900  | -1. 56413300 | 1. 38064500  |
| C | 4. 77067400  | -1. 18380400 | 1. 14630800  |
| C | 0. 24943900  | -1. 94847600 | -2. 56001000 |
| C | 1. 28837100  | -2. 86529200 | -2. 70982000 |
| C | 1. 10893500  | -3. 95117000 | -3. 58215400 |
| C | 0. 00021800  | -4. 01194500 | -4. 41759800 |
| C | -0. 92160200 | -2. 96762200 | -4. 39164700 |
| C | -0. 83807200 | -1. 92080900 | -3. 45677700 |
| H | 5. 35904800  | -0. 82970700 | 1. 98763700  |
| H | -1. 74765300 | -2. 96120300 | -5. 09537700 |
| C | 2. 74163300  | -2. 85656100 | -2. 23802400 |
| C | 3. 63362600  | -2. 14582200 | -3. 31734300 |
| H | 3. 70485200  | -2. 72318600 | -4. 24333300 |

|   |             |             |             |
|---|-------------|-------------|-------------|
| H | 3.18917600  | -1.17526200 | -3.56222300 |
| H | 2.88463600  | -4.91897000 | -4.37635600 |
| H | 1.92041700  | -5.95547700 | -3.33131500 |
| C | 2.68750800  | -2.01377800 | 0.27809100  |
| H | 6.35800400  | -0.90026900 | -0.28475200 |
| H | -0.13186600 | -4.83998800 | -5.10927700 |
| C | 4.99067000  | -1.91932300 | -2.62411600 |
| H | 5.52269000  | -1.04578400 | -3.01123200 |
| H | 5.65647400  | -2.78493600 | -2.74766700 |
| C | 2.26385300  | -4.92389800 | -3.47003900 |
| C | 3.04218100  | -4.39077100 | -2.24582300 |
| H | 2.64088000  | -4.83334000 | -1.32758100 |
| H | 4.11443900  | -4.60621500 | -2.28503800 |
| C | -1.83688900 | -0.80933400 | -3.53053400 |
| C | -3.22698400 | -1.09422900 | -3.46891200 |
| C | -1.39679300 | 0.51036900  | -3.82174400 |
| C | -3.74546300 | -2.39625600 | -3.16601100 |
| C | -4.18430000 | -0.04211700 | -3.72851200 |
| C | -2.36976600 | 1.56392500  | -4.00713900 |
| C | -5.09292500 | -2.65004600 | -3.18803100 |
| H | -3.05792600 | -3.18524100 | -2.89204900 |
| C | -5.57981900 | -0.35284400 | -3.74977000 |
| C | -3.73218200 | 1.25776600  | -3.96558800 |
| C | -6.02631100 | -1.62265900 | -3.50354600 |
| H | -5.45311600 | -3.64819800 | -2.95360100 |
| H | -6.27918500 | 0.44942800  | -3.97259500 |
| H | -4.45859200 | 2.04842200  | -4.14328800 |
| H | -7.08916300 | -1.84760700 | -3.53237900 |
| C | 2.93211300  | -1.54428700 | 2.78991300  |
| C | 2.74454000  | -0.31185000 | 3.46128300  |
| C | 2.77899100  | -2.76768900 | 3.48969500  |
| C | 2.88027000  | 0.95541900  | 2.80624400  |
| C | 2.40310600  | -0.30727800 | 4.86700800  |
| C | 2.41934800  | -2.74842500 | 4.89023700  |
| C | 2.71332200  | 2.13319600  | 3.48782200  |
| H | 3.11344000  | 0.97356200  | 1.74814300  |
| C | 2.23981300  | 0.94441300  | 5.54129700  |
| C | 2.24577400  | -1.52236900 | 5.53949500  |
| C | 2.39421300  | 2.13146600  | 4.87634100  |
| H | 2.82235400  | 3.07881400  | 2.96467300  |
| H | 1.99684200  | 0.92940800  | 6.60148200  |
| H | 1.99348800  | -1.51443800 | 6.59821300  |
| H | 2.27348300  | 3.07545200  | 5.40059900  |
| C | 0.36985200  | 2.14701000  | -4.26836600 |

|   |              |              |              |
|---|--------------|--------------|--------------|
| H | 1. 42507100  | 2. 36997600  | -4. 39247900 |
| C | -0. 01866300 | 0. 86101300  | -3. 99489500 |
| H | 0. 73505900  | 0. 08588800  | -3. 92724700 |
| C | -0. 59254500 | 3. 18793200  | -4. 39397200 |
| H | -0. 26619300 | 4. 20398300  | -4. 59682100 |
| C | -1. 92364300 | 2. 89667800  | -4. 27413800 |
| H | -2. 67448500 | 3. 67479100  | -4. 38969100 |
| C | 2. 85378900  | -5. 20866800 | 3. 58951300  |
| H | 3. 02787900  | -6. 16342700 | 3. 10071100  |
| C | 2. 47828900  | -5. 18387100 | 4. 96262000  |
| H | 2. 36510500  | -6. 11733000 | 5. 50697200  |
| C | 2. 27025100  | -3. 98625800 | 5. 59112000  |
| H | 1. 99402600  | -3. 95163200 | 6. 64239600  |
| C | 2. 99980500  | -4. 04506700 | 2. 88080800  |
| H | 3. 29081700  | -4. 08559300 | 1. 83750600  |
| N | -1. 20365300 | -2. 06955700 | 0. 55566400  |
| S | -1. 76809400 | -3. 57379400 | 0. 27999300  |
| C | -0. 56051900 | -4. 80815100 | 1. 04337300  |
| O | -2. 98229700 | -3. 70596800 | 1. 09018700  |
| O | -1. 76420700 | -3. 94713000 | -1. 13502000 |
| F | -1. 21334500 | -5. 96119600 | 1. 21013200  |
| F | -0. 11356500 | -4. 38670100 | 2. 23029000  |
| F | 0. 48070300  | -5. 01612100 | 0. 23333000  |
| C | -1. 06831300 | 0. 98082500  | 3. 62845900  |
| H | -0. 16462200 | 0. 73146700  | 3. 06133900  |
| H | -1. 20287600 | 2. 06142500  | 3. 63927400  |
| H | -0. 88253100 | 0. 63649600  | 4. 65662600  |
| C | -1. 22890600 | -1. 96099900 | 3. 84763700  |
| H | -1. 41837800 | -1. 77757300 | 4. 91272600  |
| H | -1. 36323300 | -3. 02496000 | 3. 65777900  |
| H | -0. 18673400 | -1. 70972300 | 3. 64009500  |
| C | -5. 07319100 | 2. 80516700  | 2. 13334700  |
| C | -6. 20864500 | 2. 10724200  | 2. 58774700  |
| C | -5. 16323300 | 4. 20742000  | 2. 10828900  |
| C | -7. 36610800 | 2. 76807500  | 2. 99475000  |
| H | -6. 20944700 | 1. 02451700  | 2. 62284000  |
| C | -6. 32411400 | 4. 87350800  | 2. 51209800  |
| H | -4. 33190900 | 4. 82001600  | 1. 78284200  |
| C | -7. 43299900 | 4. 16082100  | 2. 95812300  |
| H | -8. 21791700 | 2. 18701300  | 3. 33845600  |
| H | -6. 34768300 | 5. 95942000  | 2. 47836500  |
| H | -8. 33393600 | 4. 67951500  | 3. 27413400  |
| C | -4. 00803800 | 1. 31102300  | 0. 31156900  |
| H | -3. 14096100 | 0. 66352900  | 0. 12420800  |

|   |             |             |             |
|---|-------------|-------------|-------------|
| H | -3.96165800 | 2.10484700  | -0.44196200 |
| C | -5.27967100 | 0.50854000  | 0.08270700  |
| C | -6.32396600 | 1.10880900  | -0.51143000 |
| H | -6.20519700 | 2.15489000  | -0.79666000 |
| C | -5.29459300 | -0.94230400 | 0.51466800  |
| H | -4.30390200 | -1.39926700 | 0.43287600  |
| H | -5.62036700 | -1.07120000 | 1.55853400  |
| H | -5.97052500 | -1.54345800 | -0.09863500 |
| C | -7.68326400 | 0.53848700  | -0.79392700 |
| H | -8.44132500 | 1.04052300  | -0.17552500 |
| H | -7.97141900 | 0.70590700  | -1.83957000 |
| H | -7.74964600 | -0.53393200 | -0.59378800 |

TS-1-1-6RR

l imaginary frequency

H = -5393.903756

G = -5394.108715

E(M06-2X-DCM) = -5394.834826

|   |             |             |             |
|---|-------------|-------------|-------------|
| C | -2.77951300 | 3.92113000  | 1.25384600  |
| C | -2.64164800 | 3.20757400  | 2.64601300  |
| H | -3.63905200 | 2.87747100  | 2.94148200  |
| H | -2.34707200 | 4.00128500  | 3.34839200  |
| C | -1.65684800 | 2.10360300  | 2.92355100  |
| C | -1.43190600 | 4.51039000  | 0.77058600  |
| H | -1.61697900 | 5.26665100  | -0.00273300 |
| H | -0.95499900 | 5.05511100  | 1.59110600  |
| N | -0.49734300 | 3.51440200  | 0.27398200  |
| C | 0.79622400  | 3.81585000  | -0.05214600 |
| N | 1.47524000  | 2.71459900  | -0.51189700 |
| C | 2.73733000  | 2.55615600  | -1.09955000 |
| C | 3.70591700  | 3.55725200  | -1.25997200 |
| C | 3.01954900  | 1.25766300  | -1.57292800 |
| C | 4.92202000  | 3.25017900  | -1.87899100 |
| C | 4.23156700  | 0.97981500  | -2.19004800 |
| H | 2.27186200  | 0.47974800  | -1.47093700 |
| C | 5.20297200  | 1.97258800  | -2.35066300 |
| H | 6.14433300  | 1.75644100  | -2.84186600 |
| C | 4.51242200  | -0.39582200 | -2.72710000 |
| C | 5.96949600  | 4.33010600  | -1.97708600 |
| F | 3.44182700  | -1.21969100 | -2.62314000 |
| F | 4.85024000  | -0.35486900 | -4.03909500 |
| F | 5.53893200  | -1.00096100 | -2.08483600 |
| F | 6.87185800  | 4.07074400  | -2.95019600 |
| F | 5.42668800  | 5.53722200  | -2.23781300 |

|   |             |             |             |
|---|-------------|-------------|-------------|
| F | 6.66225800  | 4.45167400  | -0.82006700 |
| S | 1.41074500  | 5.37188400  | 0.15537000  |
| C | -3.69506600 | 5.19087800  | 1.49056600  |
| H | -3.85359600 | 5.63966900  | 0.50478400  |
| H | -3.10340600 | 5.91508100  | 2.06800500  |
| H | 3.50511000  | 4.56081000  | -0.91325000 |
| C | -2.08917100 | 0.78945900  | 3.16890600  |
| H | 1.00844500  | 1.81987600  | -0.33383800 |
| H | -3.17201500 | 0.67659400  | 3.25755600  |
| H | -0.88930900 | 2.64454400  | -0.07173400 |
| H | -1.92230900 | 0.15318100  | 2.05999500  |
| O | 0.44113000  | -2.22891500 | 1.23696300  |
| O | -0.20728400 | -1.46307100 | -1.19215600 |
| P | -0.27797000 | -1.03976200 | 0.37824900  |
| O | 0.38489900  | 0.29235800  | 0.49226500  |
| C | 4.54893400  | -2.84273300 | 0.63814500  |
| C | 3.61200700  | -3.41354800 | -0.21490100 |
| C | 2.23769300  | -3.26856200 | 0.02957200  |
| C | 2.73451200  | -1.95550900 | 2.02315200  |
| C | 4.10215300  | -2.15641300 | 1.76464600  |
| C | -0.58579900 | -2.66746800 | -1.81122600 |
| C | 0.05201800  | -3.86306700 | -1.47132600 |
| C | -0.51861100 | -5.07892400 | -1.88201200 |
| C | -1.57660100 | -5.09385600 | -2.78148600 |
| C | -2.02721700 | -3.88369400 | -3.30073500 |
| C | -1.56230600 | -2.63941400 | -2.83272400 |
| H | 4.82047300  | -1.75324000 | 2.47214400  |
| H | -2.77251500 | -3.88550200 | -4.08870700 |
| C | 1.44194900  | -4.16135400 | -0.90819200 |
| C | 2.45428900  | -4.28516100 | -2.10459400 |
| H | 2.28180400  | -5.18724300 | -2.69805900 |
| H | 2.32717400  | -3.42421300 | -2.76738300 |
| H | 0.74869700  | -6.83572000 | -2.03797700 |
| H | -0.46544000 | -6.94929600 | -0.77021100 |
| C | 1.81540300  | -2.47457400 | 1.09092100  |
| H | 5.61322400  | -2.94558100 | 0.44525800  |
| H | -2.00877900 | -6.03106600 | -3.12263900 |
| C | 3.85350300  | -4.23328000 | -1.45972800 |
| H | 4.60277600  | -3.77487900 | -2.11369700 |
| H | 4.22041900  | -5.23746400 | -1.20542200 |
| C | 0.21700500  | -6.25400900 | -1.27290900 |
| C | 1.19698500  | -5.57509600 | -0.28997900 |
| H | 0.72163500  | -5.45517400 | 0.68974100  |
| H | 2.12756500  | -6.13371000 | -0.14861900 |

|   |             |             |             |
|---|-------------|-------------|-------------|
| C | -2.03655200 | -1.41752200 | -3.55977200 |
| C | -3.42933000 | -1.21878800 | -3.77092600 |
| C | -1.09808300 | -0.58805100 | -4.23711300 |
| C | -4.43886200 | -1.98188200 | -3.09655300 |
| C | -3.87898600 | -0.22113000 | -4.71582000 |
| C | -1.57380900 | 0.46149600  | -5.11298400 |
| C | -5.76983800 | -1.82791800 | -3.39104100 |
| H | -4.14034800 | -2.67173100 | -2.31914400 |
| C | -5.27544600 | -0.10201300 | -5.00539000 |
| C | -2.94370600 | 0.60435400  | -5.34165300 |
| C | -6.19851400 | -0.89321700 | -4.37591200 |
| H | -6.50825300 | -2.42141900 | -2.85865000 |
| H | -5.58491500 | 0.63571800  | -5.74241000 |
| H | -3.28769300 | 1.36196500  | -6.04335800 |
| H | -7.25586600 | -0.79861300 | -4.60892500 |
| C | 2.37108700  | -1.30022200 | 3.31923100  |
| C | 2.72973800  | 0.04970800  | 3.55438500  |
| C | 1.82898900  | -2.08640800 | 4.36855300  |
| C | 3.24795600  | 0.90219800  | 2.52543700  |
| C | 2.56962400  | 0.61383700  | 4.87660700  |
| C | 1.65671200  | -1.50279300 | 5.68065800  |
| C | 3.59859700  | 2.20221600  | 2.78476200  |
| H | 3.34460400  | 0.50747700  | 1.52091600  |
| C | 2.95772300  | 1.97206100  | 5.10687100  |
| C | 2.04077300  | -0.17643800 | 5.90065700  |
| C | 3.46052500  | 2.74513000  | 4.09466200  |
| H | 3.97685400  | 2.83032500  | 1.98352400  |
| H | 2.84463400  | 2.37602600  | 6.11050900  |
| H | 1.92869800  | 0.24944600  | 6.89601200  |
| H | 3.75062400  | 3.77536600  | 4.28091500  |
| C | 1.19235000  | 0.05017900  | -4.83464400 |
| H | 2.26093300  | -0.12234100 | -4.75648000 |
| C | 0.32177100  | -0.76503800 | -4.15800000 |
| H | 0.72293700  | -1.57106100 | -3.55818500 |
| C | 0.71289000  | 1.11328600  | -5.64918800 |
| H | 1.41780300  | 1.75576000  | -6.16949400 |
| C | -0.63406900 | 1.30475300  | -5.78505600 |
| H | -1.02187100 | 2.09627900  | -6.42213300 |
| C | 0.94026500  | -4.19049800 | 5.24027500  |
| H | 0.66689200  | -5.23038400 | 5.08341600  |
| C | 0.75708000  | -3.60504400 | 6.52486700  |
| H | 0.34301900  | -4.20002100 | 7.33421900  |
| C | 1.11067700  | -2.29990900 | 6.73519800  |
| H | 0.98626100  | -1.84186300 | 7.71369500  |



|   |             |             |             |
|---|-------------|-------------|-------------|
| C | 1.46090700  | -3.46053400 | 4.20377300  |
| H | 1.60150500  | -3.92946200 | 3.23702700  |
| N | -1.77801900 | -0.97752800 | 1.06277300  |
| S | -3.00472400 | -2.04120200 | 1.11975400  |
| C | -2.41831200 | -3.53526900 | 2.10789200  |
| O | -4.04922300 | -1.43343600 | 1.95036500  |
| O | -3.33479400 | -2.61788500 | -0.18309800 |
| F | -3.49152200 | -4.25425500 | 2.44585500  |
| F | -1.77094400 | -3.17323600 | 3.22032600  |
| F | -1.60618900 | -4.29292400 | 1.36270500  |
| C | -3.43479500 | 3.03176900  | 0.18638100  |
| C | -4.15026600 | 1.86738200  | 0.49550800  |
| C | -3.42150100 | 3.44777800  | -1.15865000 |
| C | -4.83841300 | 1.15363800  | -0.48726900 |
| H | -4.19976400 | 1.49397000  | 1.50945900  |
| C | -4.11291000 | 2.74180300  | -2.14032300 |
| H | -2.87712100 | 4.34170700  | -1.44879300 |
| C | -4.83347900 | 1.59359700  | -1.80759800 |
| H | -5.36920600 | 0.24825200  | -0.20955500 |
| H | -4.08151000 | 3.08652900  | -3.17015100 |
| H | -5.37321400 | 1.04441300  | -2.57018100 |
| C | -5.04084000 | 4.99059000  | 2.17655800  |
| C | -6.10067200 | 4.57754100  | 1.46140400  |
| H | -5.94239900 | 4.39309200  | 0.39927000  |
| C | -5.09753400 | 5.36083700  | 3.64250100  |
| H | -6.08644200 | 5.21050400  | 4.08087500  |
| H | -4.38213800 | 4.78547300  | 4.24415200  |
| H | -4.83311100 | 6.41885800  | 3.77884800  |
| C | -0.22314900 | 2.45575700  | 3.13057000  |
| H | 0.42672000  | 1.78591600  | 2.55718800  |
| H | 0.01283600  | 3.48813200  | 2.87798200  |
| H | 0.02994100  | 2.28647100  | 4.18770500  |
| C | -1.29326300 | -0.10639500 | 4.12021300  |
| H | -1.24800800 | 0.34094200  | 5.12054800  |
| H | -1.78177200 | -1.07632400 | 4.20213000  |
| H | -0.27190100 | -0.27407100 | 3.77607100  |
| C | -7.50760400 | 4.32519700  | 1.92346400  |
| H | -8.21328200 | 4.97460600  | 1.38746000  |
| H | -7.80399600 | 3.29234100  | 1.69666400  |
| H | -7.65352800 | 4.48661900  | 2.99455700  |

TS-1-1-6RR-1

l imaginary frequency

H = -5393.905723

G = -5394.111676

E(M06-2X-DCM) = -5394.834766

|   |             |             |             |
|---|-------------|-------------|-------------|
| C | -3.25493400 | 3.76364100  | 0.38443800  |
| C | -3.22161300 | 3.18890100  | 1.84460500  |
| H | -4.20065900 | 2.75213600  | 2.04784600  |
| H | -3.14571100 | 4.07129700  | 2.49992300  |
| C | -2.15249500 | 2.27769400  | 2.38279500  |
| C | -1.90808300 | 4.40099700  | -0.04096700 |
| H | -2.07150800 | 5.04254300  | -0.91613200 |
| H | -1.55117800 | 5.07433000  | 0.74400000  |
| N | -0.86233700 | 3.43402100  | -0.32933100 |
| C | 0.42967700  | 3.80558700  | -0.58229800 |
| N | 1.23183200  | 2.72051100  | -0.83845800 |
| C | 2.54960500  | 2.60692900  | -1.30165600 |
| C | 3.41668500  | 3.67007700  | -1.59236700 |
| C | 3.00404300  | 1.28722300  | -1.50522200 |
| C | 4.70349700  | 3.40293300  | -2.07024400 |
| C | 4.28390100  | 1.04837900  | -1.98761300 |
| H | 2.33696600  | 0.45748800  | -1.30279300 |
| C | 5.15464000  | 2.10359400  | -2.27532300 |
| H | 6.14911700  | 1.91547100  | -2.66227400 |
| C | 4.75228300  | -0.35871300 | -2.23357100 |
| C | 5.63509500  | 4.56339900  | -2.31212800 |
| F | 3.75942100  | -1.26774500 | -2.08003000 |
| F | 5.22998900  | -0.50755000 | -3.49346700 |
| F | 5.75283500  | -0.72416700 | -1.39835900 |
| F | 6.62411100  | 4.24373400  | -3.17728900 |
| F | 4.98696700  | 5.63469000  | -2.81448900 |
| F | 6.23084100  | 4.96583800  | -1.16496400 |
| S | 0.90246500  | 5.42237900  | -0.51895000 |
| C | -4.25380000 | 4.99021300  | 0.43324400  |
| H | -4.36087700 | 5.35442700  | -0.59578400 |
| H | -3.74643900 | 5.78576500  | 0.99383800  |
| H | 3.08564600  | 4.68892700  | -1.45229700 |
| C | -2.46777200 | 0.97636000  | 2.80790900  |
| H | 0.83317200  | 1.81959900  | -0.55629100 |
| H | -3.53654600 | 0.74832400  | 2.81435000  |
| H | -1.15725300 | 2.50447800  | -0.60983100 |
| H | -2.11765000 | 0.20104400  | 1.83432500  |
| O | 0.51908800  | -1.99998400 | 1.59775400  |
| O | 0.05774100  | -1.67137400 | -0.96797200 |
| P | -0.21040500 | -1.03151300 | 0.50421900  |
| O | 0.31190900  | 0.36542600  | 0.46648700  |
| C | 4.70401600  | -2.26790400 | 1.45942400  |

|   |             |             |             |
|---|-------------|-------------|-------------|
| C | 3.91241800  | -3.05598200 | 0.63254400  |
| C | 2.51309700  | -3.01796600 | 0.73125500  |
| C | 2.68784100  | -1.37063300 | 2.52103700  |
| C | 4.08693300  | -1.46634900 | 2.41680800  |
| C | -0.14950200 | -2.98674700 | -1.42016400 |
| C | 0.55105600  | -4.04767200 | -0.84111900 |
| C | 0.13102500  | -5.36221300 | -1.10223100 |
| C | -0.82633400 | -5.61720400 | -2.07554800 |
| C | -1.32486300 | -4.54959300 | -2.81664300 |
| C | -1.01709800 | -3.20932200 | -2.51338200 |
| H | 4.69162600  | -0.88676500 | 3.10784900  |
| H | -1.98516100 | -4.74355500 | -3.65503200 |
| C | 1.89706500  | -4.11726900 | -0.11850900 |
| C | 3.03297900  | -4.31579900 | -1.18710600 |
| H | 3.00106300  | -5.30980400 | -1.64163900 |
| H | 2.89944600  | -3.58197500 | -1.98722800 |
| H | 1.55432600  | -6.98577700 | -0.86784100 |
| H | 0.23201600  | -7.03122100 | 0.29135000  |
| C | 1.91775700  | -2.11994100 | 1.61095300  |
| H | 5.78725000  | -2.28837700 | 1.37765800  |
| H | -1.14043500 | -6.63340300 | -2.29963100 |
| C | 4.34960300  | -4.02491000 | -0.43983000 |
| H | 5.11839200  | -3.59608600 | -1.09129900 |
| H | 4.77527200  | -4.93660000 | 0.00212600  |
| C | 0.89944500  | -6.35327400 | -0.25342700 |
| C | 1.71246300  | -5.44026500 | 0.69164600  |
| H | 1.13137700  | -5.22397100 | 1.59485000  |
| H | 2.66828800  | -5.87528800 | 1.00020100  |
| C | -1.51832900 | -2.16239800 | -3.46190500 |
| C | -2.89571200 | -2.13112700 | -3.81579500 |
| C | -0.58970800 | -1.35844400 | -4.18236900 |
| C | -3.90051000 | -2.87559900 | -3.11390500 |
| C | -3.33197700 | -1.33433100 | -4.94049700 |
| C | -1.06279200 | -0.50328900 | -5.24993000 |
| C | -5.20644800 | -2.88968800 | -3.53385100 |
| H | -3.62221200 | -3.41302100 | -2.21780300 |
| C | -4.69947300 | -1.39242900 | -5.35851800 |
| C | -2.41140700 | -0.52744800 | -5.61002700 |
| C | -5.61307800 | -2.15882100 | -4.68627400 |
| H | -5.94231700 | -3.46230700 | -2.97568400 |
| H | -4.99460000 | -0.80868800 | -6.22771700 |
| H | -2.74727700 | 0.08150900  | -6.44719700 |
| H | -6.64790600 | -2.19947400 | -5.01598200 |
| C | 2.13777700  | -0.56391700 | 3.65604400  |

|   |             |             |             |
|---|-------------|-------------|-------------|
| C | 2.34248700  | 0.83707400  | 3.69337000  |
| C | 1.56946500  | -1.23094500 | 4.77177700  |
| C | 2.87760500  | 1.56985700  | 2.58403300  |
| C | 1.99897000  | 1.57981300  | 4.88608200  |
| C | 1.21433700  | -0.47227600 | 5.95082200  |
| C | 3.07387800  | 2.92521800  | 2.65190900  |
| H | 3.11208400  | 1.03586700  | 1.67080700  |
| C | 2.23077200  | 2.99178100  | 4.91922400  |
| C | 1.44860900  | 0.90592800  | 5.97967400  |
| C | 2.75454300  | 3.64782900  | 3.83750900  |
| H | 3.46702100  | 3.45879600  | 1.79154100  |
| H | 1.98029500  | 3.53275000  | 5.82910200  |
| H | 1.19867400  | 1.46712100  | 6.87815800  |
| H | 2.92373900  | 4.72034900  | 3.87285400  |
| C | 1.68753200  | -0.60062800 | -4.68156100 |
| H | 2.75392300  | -0.65517100 | -4.48808200 |
| C | 0.82528600  | -1.38380700 | -3.95800700 |
| H | 1.23093100  | -2.04657400 | -3.20526900 |
| C | 1.20392500  | 0.27579400  | -5.69219600 |
| H | 1.90099900  | 0.89671900  | -6.24801500 |
| C | -0.13475800 | 0.31485500  | -5.96756200 |
| H | -0.52276000 | 0.96050100  | -6.75198600 |
| C | 0.79690300  | -3.25704000 | 5.90092500  |
| H | 0.63778200  | -4.33192200 | 5.89527600  |
| C | 0.43398600  | -2.50209300 | 7.05196600  |
| H | -0.00142500 | -3.00499600 | 7.91104300  |
| C | 0.64280100  | -1.14981100 | 7.07326500  |
| H | 0.38002800  | -0.56128200 | 7.94924200  |
| C | 1.34826000  | -2.64546500 | 4.80536200  |
| H | 1.62719600  | -3.24098700 | 3.94405800  |
| N | -1.77357500 | -1.02889300 | 1.03674700  |
| S | -2.89684300 | -2.19682600 | 1.15017300  |
| C | -2.29545900 | -3.45110100 | 2.42244100  |
| O | -4.07859900 | -1.58024600 | 1.76149000  |
| O | -3.02599100 | -2.99793800 | -0.06659900 |
| F | -3.33336500 | -4.21520200 | 2.77078800  |
| F | -1.80811400 | -2.85590000 | 3.51581100  |
| F | -1.34388000 | -4.22685300 | 1.89250500  |
| C | -3.72921200 | 2.73627300  | -0.65696100 |
| C | -4.16679600 | 1.44665200  | -0.32606900 |
| C | -3.79539600 | 3.11809600  | -2.01034400 |
| C | -4.68425500 | 0.58391900  | -1.29540400 |
| H | -4.13373100 | 1.08767200  | 0.69384200  |
| C | -4.31278500 | 2.26139900  | -2.97821700 |

|   |             |             |             |
|---|-------------|-------------|-------------|
| H | -3.45118800 | 4.10179700  | -2.31703000 |
| C | -4.77319000 | 0.99222300  | -2.62328500 |
| H | -5.01196100 | -0.40844000 | -1.00148700 |
| H | -4.35631600 | 2.58837500  | -4.01374200 |
| H | -5.18269400 | 0.32544900  | -3.37343200 |
| C | -5.63527200 | 4.78631700  | 1.03123100  |
| C | -5.90389300 | 5.30528200  | 2.24282200  |
| H | -5.09738900 | 5.84352500  | 2.74498300  |
| C | -6.65248600 | 4.06731300  | 0.17513100  |
| H | -7.66104800 | 4.12163600  | 0.59093000  |
| H | -6.68096900 | 4.50558600  | -0.83083500 |
| H | -6.40093000 | 3.00978000  | 0.03997300  |
| C | -0.79499700 | 2.82852900  | 2.66168100  |
| H | -0.02146800 | 2.17161700  | 2.24888500  |
| H | -0.64539000 | 3.83820900  | 2.28417700  |
| H | -0.63495200 | 2.83310300  | 3.74965500  |
| C | -1.69005300 | 0.34099900  | 3.96127000  |
| H | -1.80050900 | 0.93923700  | 4.87392300  |
| H | -2.07908600 | -0.65671300 | 4.15950200  |
| H | -0.62540500 | 0.24785200  | 3.74294300  |
| C | -7.18781200 | 5.26321700  | 3.02244200  |
| H | -7.03525200 | 4.77392600  | 3.99426900  |
| H | -7.54329800 | 6.27961500  | 3.23990100  |
| H | -7.99067400 | 4.72999400  | 2.50786000  |

TS-1-1-6RR-2

l imaginary frequency

H = -5393.904660

G = -5394.111344

E(M06-2X-DCM) = -5394.834900

|   |             |            |             |
|---|-------------|------------|-------------|
| C | -1.93979600 | 3.49160400 | 2.91063400  |
| C | -1.46645700 | 2.51742600 | 4.06115400  |
| H | -2.35354300 | 2.23237100 | 4.63074100  |
| H | -0.84468300 | 3.13073500 | 4.72716500  |
| C | -0.66125100 | 1.27590200 | 3.79521300  |
| C | -0.73592700 | 4.11491600 | 2.17503900  |
| H | -1.07929800 | 4.96763000 | 1.58035500  |
| H | -0.04565500 | 4.53460900 | 2.91448700  |
| N | 0.00954900  | 3.19137000 | 1.33051400  |
| C | 1.16365100  | 3.55408400 | 0.69381600  |
| N | 1.63872700  | 2.55005800 | -0.11291200 |
| C | 2.68939900  | 2.49526800 | -1.03708100 |
| C | 3.74791100  | 3.40863000 | -1.13809700 |
| C | 2.65363300  | 1.39629100 | -1.92002000 |

|   |              |              |              |
|---|--------------|--------------|--------------|
| C | 4. 73788500  | 3. 21385900  | -2. 10721100 |
| C | 3. 64490000  | 1. 22740800  | -2. 87678800 |
| H | 1. 83081700  | 0. 69307100  | -1. 86041400 |
| C | 4. 70354100  | 2. 13485500  | -2. 98403400 |
| H | 5. 47181000  | 2. 00741400  | -3. 73747300 |
| C | 3. 57737200  | 0. 07915000  | -3. 84438000 |
| C | 5. 89906600  | 4. 17458900  | -2. 14544300 |
| F | 2. 46721500  | -0. 67857000 | -3. 67019000 |
| F | 3. 55844200  | 0. 51243800  | -5. 12766600 |
| F | 4. 64182300  | -0. 75042900 | -3. 73328500 |
| F | 6. 54989700  | 4. 13506400  | -3. 32969300 |
| F | 5. 50619400  | 5. 44834300  | -1. 93967300 |
| F | 6. 80923100  | 3. 88420900  | -1. 18520400 |
| S | 1. 86518500  | 5. 06844600  | 0. 93402800  |
| C | -2. 63788500 | 4. 67255900  | 3. 70408000  |
| H | -1. 86866400 | 5. 11504500  | 4. 35038800  |
| H | -3. 38067000 | 4. 21391000  | 4. 36945100  |
| H | 3. 78390900  | 4. 26433400  | -0. 47869300 |
| C | -1. 25693600 | 0. 00371500  | 3. 80222900  |
| H | 1. 13467900  | 1. 66186800  | -0. 03710400 |
| H | -2. 30311700 | -0. 00582900 | 4. 11369800  |
| H | -0. 45644600 | 2. 34320300  | 1. 02320100  |
| H | -1. 42085800 | -0. 34891600 | 2. 56813900  |
| O | 0. 41245100  | -2. 54364000 | 0. 61605600  |
| O | -0. 76153500 | -1. 17915900 | -1. 29822200 |
| P | -0. 38525600 | -1. 15635600 | 0. 28563700  |
| O | 0. 41512200  | 0. 08181400  | 0. 52187600  |
| C | 4. 16357800  | -3. 11195200 | -1. 18034600 |
| C | 2. 99269800  | -3. 41165900 | -1. 86627000 |
| C | 1. 74368400  | -3. 29358100 | -1. 23713600 |
| C | 2. 84594700  | -2. 56091500 | 0. 81019400  |
| C | 4. 07987000  | -2. 73179300 | 0. 15665300  |
| C | -1. 39064900 | -2. 18169200 | -2. 05826900 |
| C | -0. 79510600 | -3. 43790500 | -2. 19626500 |
| C | -1. 55508500 | -4. 49848100 | -2. 71681000 |
| C | -2. 80235200 | -4. 26378800 | -3. 27987700 |
| C | -3. 26201000 | -2. 95248900 | -3. 35645900 |
| C | -2. 58816300 | -1. 87743600 | -2. 74545800 |
| H | 4. 98764200  | -2. 55291600 | 0. 72486500  |
| H | -4. 17869700 | -2. 73894900 | -3. 89532600 |
| C | 0. 65968400  | -3. 89938800 | -2. 11269300 |
| C | 1. 32113100  | -3. 74028400 | -3. 52971300 |
| H | 0. 92129300  | -4. 45566300 | -4. 25358600 |
| H | 1. 11169400  | -2. 73536400 | -3. 90802900 |

|   |             |             |             |
|---|-------------|-------------|-------------|
| H | -0.52728600 | -6.18612900 | -3.61782300 |
| H | -1.38759600 | -6.58961500 | -2.13748000 |
| C | 1.67707100  | -2.78731200 | 0.05710400  |
| H | 5.13133400  | -3.19496800 | -1.66731000 |
| H | -3.38601600 | -5.07502600 | -3.70734100 |
| C | 2.83597800  | -3.89231200 | -3.28911800 |
| H | 3.43623500  | -3.30263200 | -3.98962200 |
| H | 3.15949600  | -4.93775800 | -3.38937800 |
| C | -0.79571900 | -5.80505600 | -2.62327900 |
| C | 0.45565300  | -5.41752500 | -1.80466800 |
| H | 0.25441100  | -5.53668500 | -0.73432400 |
| H | 1.33923000  | -6.01429900 | -2.05171400 |
| C | -3.12567600 | -0.50318200 | -3.00521900 |
| C | -4.50382200 | -0.23040200 | -2.77931600 |
| C | -2.32136800 | 0.45334000  | -3.68713000 |
| C | -5.37310100 | -1.12606700 | -2.07356100 |
| C | -5.08747500 | 0.99197400  | -3.28543100 |
| C | -2.91024900 | 1.70181900  | -4.12251600 |
| C | -6.71396300 | -0.86845600 | -1.94172900 |
| H | -4.95135300 | -2.00592700 | -1.60829100 |
| C | -6.49118500 | 1.22168700  | -3.12928300 |
| C | -4.27420700 | 1.92928100  | -3.92627900 |
| C | -7.29030600 | 0.31152200  | -2.49124700 |
| H | -7.34223000 | -1.56793700 | -1.39687900 |
| H | -6.90845100 | 2.14045300  | -3.53508700 |
| H | -4.71729700 | 2.85049700  | -4.30017300 |
| H | -8.35652200 | 0.49359200  | -2.38552000 |
| C | 2.88514500  | -2.25695100 | 2.27534700  |
| C | 3.46138200  | -1.04455600 | 2.72870900  |
| C | 2.51449800  | -3.26091000 | 3.20743900  |
| C | 3.82856200  | 0.01748400  | 1.83900600  |
| C | 3.69497500  | -0.84598700 | 4.14220000  |
| C | 2.73158200  | -3.03743700 | 4.61999500  |
| C | 4.40299400  | 1.17250800  | 2.30378700  |
| H | 3.63081300  | -0.09736600 | 0.77977500  |
| C | 4.30424000  | 0.37116300  | 4.58447700  |
| C | 3.32285300  | -1.84437100 | 5.04633400  |
| C | 4.65347100  | 1.35149500  | 3.69463700  |
| H | 4.66414700  | 1.96357600  | 1.60688100  |
| H | 4.48604600  | 0.49761200  | 5.64945400  |
| H | 3.50500500  | -1.69344800 | 6.10872700  |
| H | 5.11623000  | 2.27087700  | 4.04234900  |
| C | -0.20979900 | 1.17678500  | -4.70166200 |
| H | 0.82484500  | 0.96819000  | -4.95490800 |

|   |             |             |             |
|---|-------------|-------------|-------------|
| C | -0.94875000 | 0.23305600  | -4.03586900 |
| H | -0.48164500 | -0.70865200 | -3.78008500 |
| C | -0.78598700 | 2.42225900  | -5.07703900 |
| H | -0.18273600 | 3.16237900  | -5.59535500 |
| C | -2.10164000 | 2.66921700  | -4.79848700 |
| H | -2.56730600 | 3.60519400  | -5.09823400 |
| C | 1.61056700  | -5.46794500 | 3.74557800  |
| H | 1.18533300  | -6.41287200 | 3.41858000  |
| C | 1.80645100  | -5.23271400 | 5.13572100  |
| H | 1.52560300  | -5.99578000 | 5.85636000  |
| C | 2.35560200  | -4.05175600 | 5.55560000  |
| H | 2.52283900  | -3.86225600 | 6.61334900  |
| C | 1.95556400  | -4.52042900 | 2.81752600  |
| H | 1.80704500  | -4.72561600 | 1.76406200  |
| N | -1.64344100 | -1.21152800 | 1.34940200  |
| S | -2.92274300 | -2.20786400 | 1.48318900  |
| C | -2.26034000 | -3.93192100 | 1.85786100  |
| O | -3.63852200 | -1.81663900 | 2.69979900  |
| O | -3.63823000 | -2.39784900 | 0.22223300  |
| F | -3.28176500 | -4.68387100 | 2.27612100  |
| F | -1.32182000 | -3.90774100 | 2.80950500  |
| F | -1.74214500 | -4.48232300 | 0.75383800  |
| C | -2.95190900 | 2.82128400  | 1.97443000  |
| C | -3.93078300 | 1.94537300  | 2.47193800  |
| C | -3.00567900 | 3.14719000  | 0.60947500  |
| C | -4.91876500 | 1.41358000  | 1.64587200  |
| H | -3.94591700 | 1.67204500  | 3.52190600  |
| C | -3.99860900 | 2.62261500  | -0.21826500 |
| H | -2.28180500 | 3.83003100  | 0.17858800  |
| C | -4.96079900 | 1.75409500  | 0.29439300  |
| H | -5.64731300 | 0.72348800  | 2.06076500  |
| H | -4.01105500 | 2.88808900  | -1.27046600 |
| H | -5.72695300 | 1.34158400  | -0.35205000 |
| C | -3.31207700 | 5.78268800  | 2.91106800  |
| C | -2.62433000 | 6.90441200  | 2.63361500  |
| H | -1.59117800 | 6.95692500  | 2.98140800  |
| C | -4.76926700 | 5.57237900  | 2.56969400  |
| H | -5.20850000 | 6.43172100  | 2.05834900  |
| H | -4.91739700 | 4.69264000  | 1.93553000  |
| H | -5.35042400 | 5.40066000  | 3.48675100  |
| C | 0.82077500  | 1.40583800  | 3.70585800  |
| H | 1.21703200  | 0.82772000  | 2.86516500  |
| H | 1.15524900  | 2.43922800  | 3.62189100  |
| H | 1.26474100  | 0.96555800  | 4.61153400  |



|   |             |             |            |
|---|-------------|-------------|------------|
| C | -0.44835100 | -1.19942300 | 4.30079900 |
| H | -0.12683400 | -1.03983200 | 5.33718700 |
| H | -1.07153000 | -2.09202700 | 4.27029400 |
| H | 0.43868900  | -1.38802300 | 3.69424600 |
| C | -3.08060300 | 8.13121700  | 1.89621400 |
| H | -3.00451600 | 9.01985000  | 2.53775000 |
| H | -2.43411500 | 8.31931800  | 1.02863100 |
| H | -4.11020800 | 8.06485900  | 1.53642700 |

TS-1-1-6RR-3

l imaginary frequency

H = -5393.903527

G = -5394.110157

E(M06-2X-DCM) = -5394.833894

|   |             |             |             |
|---|-------------|-------------|-------------|
| C | -1.93536500 | 3.46468600  | 2.94233300  |
| C | -1.41235400 | 2.50477200  | 4.08427100  |
| H | -2.27570500 | 2.24219400  | 4.70058300  |
| H | -0.75151700 | 3.12160600  | 4.70670700  |
| C | -0.64032100 | 1.24423300  | 3.80417700  |
| C | -0.76844800 | 4.10486900  | 2.16781300  |
| H | -1.15865700 | 4.90565300  | 1.53068600  |
| H | -0.09085300 | 4.59134100  | 2.87637900  |
| N | 0.01240200  | 3.17786700  | 1.36022100  |
| C | 1.14585400  | 3.56737600  | 0.69978100  |
| N | 1.64349200  | 2.56470900  | -0.09360500 |
| C | 2.68753900  | 2.52952500  | -1.02661100 |
| C | 3.74752500  | 3.44249700  | -1.10984000 |
| C | 2.64700200  | 1.44958300  | -1.93188300 |
| C | 4.73517800  | 3.26626700  | -2.08490500 |
| C | 3.63584700  | 1.29862500  | -2.89425900 |
| H | 1.82248100  | 0.74735600  | -1.88495600 |
| C | 4.69613400  | 2.20604100  | -2.98427100 |
| H | 5.46303100  | 2.09253100  | -3.74132700 |
| C | 3.56261200  | 0.17199800  | -3.88664800 |
| C | 5.89892700  | 4.22441500  | -2.10307300 |
| F | 2.45914600  | -0.59613200 | -3.71529200 |
| F | 3.52467200  | 0.63352400  | -5.15937400 |
| F | 4.63337500  | -0.65309100 | -3.80705000 |
| F | 6.55928900  | 4.19722100  | -3.28214800 |
| F | 5.50728900  | 5.49646700  | -1.88518900 |
| F | 6.80014200  | 3.92035100  | -1.13843800 |
| S | 1.79747300  | 5.11004600  | 0.89433300  |
| C | -2.65617300 | 4.62614900  | 3.74428600  |
| H | -1.95736100 | 4.97358700  | 4.51759800  |

|   |             |             |             |
|---|-------------|-------------|-------------|
| H | -3.49781500 | 4.16313700  | 4.27063300  |
| H | 3.78661800  | 4.28440600  | -0.43302600 |
| C | -1.26036400 | -0.01565700 | 3.80532800  |
| H | 1.15214700  | 1.66943800  | -0.01726900 |
| H | -2.30845900 | -0.00689100 | 4.10907100  |
| H | -0.43223600 | 2.31377400  | 1.06426700  |
| H | -1.41475100 | -0.37460600 | 2.56679200  |
| O | 0.44864200  | -2.52675900 | 0.59458600  |
| O | -0.75905500 | -1.16535800 | -1.30057500 |
| P | -0.37292300 | -1.14974600 | 0.28058800  |
| O | 0.40993400  | 0.09851900  | 0.52306300  |
| C | 4.19582900  | -3.03446200 | -1.22914500 |
| C | 3.02442100  | -3.34094400 | -1.91107100 |
| C | 1.77787900  | -3.24371700 | -1.27333000 |
| C | 2.88367300  | -2.51540500 | 0.77388900  |
| C | 4.11556800  | -2.66738500 | 0.11161000  |
| C | -1.37830600 | -2.17050800 | -2.06569300 |
| C | -0.76492400 | -3.41624700 | -2.21870700 |
| C | -1.51192800 | -4.48328000 | -2.74497000 |
| C | -2.76550800 | -4.26215200 | -3.29930600 |
| C | -3.24540400 | -2.95733800 | -3.36055500 |
| C | -2.58468800 | -1.87823700 | -2.74251900 |
| H | 5.02464500  | -2.48361700 | 0.67608400  |
| H | -4.16828500 | -2.75254100 | -3.89218700 |
| C | 0.69692700  | -3.85674900 | -2.14781800 |
| C | 1.34715700  | -3.67505400 | -3.56720800 |
| H | 0.95173700  | -4.38799100 | -4.29588000 |
| H | 1.12271500  | -2.66898200 | -3.93374700 |
| H | -0.46443900 | -6.14718100 | -3.66723500 |
| H | -1.31019300 | -6.57683700 | -2.18587600 |
| C | 1.71287500  | -2.74919700 | 0.02565400  |
| H | 5.16165500  | -3.10257700 | -1.72225100 |
| H | -3.33912400 | -5.07802000 | -3.73152700 |
| C | 2.86514600  | -3.81032700 | -3.33739000 |
| H | 3.45365000  | -3.20662100 | -4.03588400 |
| H | 3.20106700  | -4.85065300 | -3.44937800 |
| C | -0.73277300 | -5.77919800 | -2.66775200 |
| C | 0.51732600  | -5.38055000 | -1.85264400 |
| H | 0.32406200  | -5.51250900 | -0.78234900 |
| H | 1.40823100  | -5.96180900 | -2.11006500 |
| C | -3.14592500 | -0.51020500 | -2.98323300 |
| C | -4.52652800 | -0.26168600 | -2.74422700 |
| C | -2.36108500 | 0.46689300  | -3.65846300 |
| C | -5.37756100 | -1.18022300 | -2.04566400 |

|   |             |             |             |
|---|-------------|-------------|-------------|
| C | -5.13162400 | 0.95930700  | -3.22809700 |
| C | -2.97154800 | 1.71213000  | -4.07275700 |
| C | -6.72064100 | -0.94318100 | -1.89872600 |
| H | -4.94007600 | -2.06118500 | -1.59744900 |
| C | -6.53650900 | 1.16810200  | -3.05488600 |
| C | -4.33708000 | 1.91695300  | -3.86262200 |
| C | -7.31746600 | 0.23772800  | -2.42374400 |
| H | -7.33462600 | -1.65976500 | -1.35984700 |
| H | -6.96958900 | 2.08745600  | -3.44232000 |
| H | -4.79614900 | 2.83727000  | -4.21892700 |
| H | -8.38488100 | 0.40408700  | -2.30508600 |
| C | 2.92897500  | -2.22038000 | 2.24062700  |
| C | 3.50827800  | -1.01059900 | 2.69785900  |
| C | 2.56274000  | -3.22920000 | 3.16936600  |
| C | 3.87298500  | 0.05600800  | 1.81252600  |
| C | 3.74798100  | -0.81935700 | 4.11131300  |
| C | 2.78422600  | -3.01202500 | 4.58229100  |
| C | 4.45198400  | 1.20725300  | 2.28076100  |
| H | 3.67061400  | -0.05245000 | 0.75351600  |
| C | 4.36117100  | 0.39437000  | 4.55739500  |
| C | 3.37736400  | -1.82122000 | 5.01216300  |
| C | 4.70886900  | 1.37855900  | 3.67135700  |
| H | 4.71257000  | 2.00079700  | 1.58642500  |
| H | 4.54709000  | 0.51506400  | 5.62231300  |
| H | 3.56338600  | -1.67542700 | 6.07459600  |
| H | 5.17509300  | 2.29506200  | 4.02204700  |
| C | -0.26789500 | 1.23474500  | -4.67845400 |
| H | 0.76774800  | 1.04460800  | -4.94218000 |
| C | -0.98806800 | 0.27134600  | -4.02033400 |
| H | -0.50577700 | -0.66723600 | -3.78163200 |
| C | -0.86501500 | 2.47669700  | -5.03239200 |
| H | -0.27648700 | 3.23269000  | -5.54467800 |
| C | -2.18210800 | 2.70042100  | -4.74123000 |
| H | -2.66352000 | 3.63347400  | -5.02472300 |
| C | 1.66565300  | -5.44081600 | 3.70045600  |
| H | 1.24198000  | -6.38536600 | 3.37039400  |
| C | 1.86413500  | -5.21102300 | 5.09109900  |
| H | 1.58658600  | -5.97770400 | 5.80916800  |
| C | 2.41214200  | -4.03082800 | 5.51457700  |
| H | 2.58212600  | -3.84562900 | 6.57264300  |
| C | 2.00589600  | -4.48845600 | 2.77564600  |
| H | 1.85517600  | -4.68975100 | 1.72179000  |
| N | -1.62333800 | -1.23274500 | 1.35206000  |
| S | -2.88732300 | -2.25071700 | 1.48116600  |

|   |             |             |             |
|---|-------------|-------------|-------------|
| C | -2.19608200 | -3.96723600 | 1.83822600  |
| O | -3.60468200 | -1.88242900 | 2.70356500  |
| O | -3.60244800 | -2.44028100 | 0.22004300  |
| F | -3.20499000 | -4.73960400 | 2.24970300  |
| F | -1.25772900 | -3.93652200 | 2.78958700  |
| F | -1.66984700 | -4.49883600 | 0.72869600  |
| C | -2.96181000 | 2.76796600  | 2.04002100  |
| C | -3.94619600 | 1.92847200  | 2.58837600  |
| C | -3.02525300 | 3.02517700  | 0.66233700  |
| C | -4.94098900 | 1.35833500  | 1.79713400  |
| H | -3.95741900 | 1.71478600  | 3.65287400  |
| C | -4.02366800 | 2.46079400  | -0.13247400 |
| H | -2.30193300 | 3.68060300  | 0.19032500  |
| C | -4.98575200 | 1.62387100  | 0.42852700  |
| H | -5.67264200 | 0.69711800  | 2.25186500  |
| H | -4.04134200 | 2.67450000  | -1.19603000 |
| H | -5.75517700 | 1.17934800  | -0.19269500 |
| C | -3.15241400 | 5.83224800  | 2.95764000  |
| C | -4.35068900 | 5.78468100  | 2.35202300  |
| H | -4.91901700 | 4.85917700  | 2.44402700  |
| C | -2.25740000 | 7.05161600  | 2.98890800  |
| H | -2.65532900 | 7.88384200  | 2.40437600  |
| H | -2.13286400 | 7.40444900  | 4.02267400  |
| H | -1.24993700 | 6.83772200  | 2.61139700  |
| C | 0.84421600  | 1.34443300  | 3.71182300  |
| H | 1.22855600  | 0.75260700  | 2.87555500  |
| H | 1.19626100  | 2.37116200  | 3.61784400  |
| H | 1.28096100  | 0.90490800  | 4.62140600  |
| C | -0.47628300 | -1.23331900 | 4.31138900  |
| H | -0.15674800 | -1.07619000 | 5.34881900  |
| H | -1.11758100 | -2.11301700 | 4.28110200  |
| H | 0.40989000  | -1.44199600 | 3.70995000  |
| C | -5.03497400 | 6.84663800  | 1.53951800  |
| H | -5.25895000 | 6.47105700  | 0.53198400  |
| H | -5.99931400 | 7.11912000  | 1.99018200  |
| H | -4.44650600 | 7.76108400  | 1.43141800  |

TS-1-2-6SS

l imaginary frequency

H = -5393.907175

G = -5394.116368

E(M06-2X-DCM) = -5394.841795

|   |             |             |            |
|---|-------------|-------------|------------|
| O | -1.76156600 | -0.00939800 | 1.93659600 |
| O | -2.99168900 | -1.47011600 | 0.15478700 |

|   |             |             |             |
|---|-------------|-------------|-------------|
| P | -1.74190600 | -0.45495700 | 0.37274700  |
| O | -1.92829200 | 0.84914200  | -0.40161800 |
| N | -0.36874900 | -1.26153300 | 0.15107400  |
| S | 0.00921700  | -2.18306900 | -1.09817500 |
| C | -0.18560800 | -3.92602300 | -0.44667700 |
| F | 0.05458000  | -4.78975000 | -1.43379100 |
| F | 0.67786500  | -4.15748600 | 0.55068300  |
| F | -1.42946100 | -4.10559400 | 0.00640500  |
| C | 0.55592800  | 3.81303600  | -0.33009800 |
| C | 0.94815800  | 3.50998500  | -1.80503600 |
| H | 0.60920800  | 4.34138100  | -2.43733200 |
| H | 2.03925700  | 3.52520100  | -1.84400400 |
| C | 0.47200500  | 2.24449200  | -2.47860000 |
| C | 0.99118800  | 2.58214400  | 0.57295400  |
| H | 0.10799300  | 2.13903200  | 1.02933100  |
| H | 1.63953500  | 2.93844800  | 1.37565300  |
| N | 1.65975000  | 1.46139100  | -0.09851900 |
| C | 3.02164700  | 1.32264300  | -0.24110100 |
| N | 3.36801700  | 0.06866900  | -0.66952300 |
| C | 4.62506000  | -0.51795700 | -0.92185000 |
| C | 5.78923000  | 0.18264100  | -1.26892000 |
| C | 4.67079200  | -1.91889100 | -0.85130700 |
| C | 6.97324600  | -0.51930800 | -1.50046300 |
| C | 5.86570700  | -2.59833700 | -1.07042300 |
| H | 3.76973100  | -2.47194800 | -0.61134400 |
| C | 7.03311100  | -1.90825600 | -1.39279700 |
| H | 7.96359900  | -2.43780400 | -1.55447300 |
| C | 5.88694600  | -4.08694600 | -0.85532200 |
| C | 8.19788000  | 0.24034700  | -1.94067500 |
| F | 5.83953400  | -4.39039300 | 0.47110600  |
| F | 7.00248300  | -4.66228600 | -1.34905000 |
| F | 4.82509400  | -4.69563800 | -1.42365300 |
| F | 9.33731400  | -0.38699200 | -1.57027300 |
| F | 8.23484600  | 1.48719000  | -1.42645200 |
| F | 8.24321000  | 0.36920500  | -3.28845600 |
| S | 4.09707100  | 2.58639000  | 0.04908600  |
| C | 1.39752800  | 5.05955700  | 0.17194700  |
| H | 1.09403600  | 5.21733000  | 1.21334900  |
| H | 2.44415600  | 4.74010700  | 0.19506800  |
| H | 5.77472500  | 1.26004300  | -1.33699800 |
| C | -0.86759100 | 1.86855000  | -2.57140800 |
| H | 2.60640800  | -0.60954400 | -0.75299600 |
| H | -1.57986900 | 2.66760100  | -2.34984000 |
| O | 1.46020100  | -2.04574300 | -1.35403200 |

|   |              |              |              |
|---|--------------|--------------|--------------|
| H | 1. 13177500  | 0. 59027200  | -0. 06157700 |
| O | -0. 89855100 | -2. 10220000 | -2. 24853000 |
| H | -1. 21094600 | 1. 27482800  | -1. 40637300 |
| C | -6. 86129200 | 0. 02697400  | 0. 81771400  |
| C | -6. 05186100 | -0. 35041900 | 1. 88272000  |
| C | -4. 79963700 | -0. 93929200 | 1. 65147600  |
| C | -5. 13237200 | -0. 71982100 | -0. 75503700 |
| C | -6. 41350500 | -0. 20337900 | -0. 48025400 |
| C | -1. 66606500 | -0. 97392900 | 2. 95874700  |
| C | -2. 79602300 | -1. 72141700 | 3. 29250100  |
| C | -2. 67153900 | -2. 79022400 | 4. 19486000  |
| C | -1. 46823500 | -3. 03395500 | 4. 84490100  |
| C | -0. 39202700 | -2. 18584500 | 4. 60181500  |
| C | -0. 45330700 | -1. 14616500 | 3. 65521600  |
| H | -7. 05785800 | 0. 03250200  | -1. 32119900 |
| H | 0. 53813800  | -2. 32657900 | 5. 14307200  |
| C | -4. 26800400 | -1. 52215300 | 2. 95269100  |
| C | -4. 95352400 | -0. 56822100 | 3. 98829600  |
| H | -5. 02038500 | -1. 01362400 | 4. 98542000  |
| H | -4. 35681800 | 0. 34757200  | 4. 07118800  |
| H | -3. 84103500 | -4. 62852900 | 4. 26572600  |
| H | -4. 45956000 | -3. 33798300 | 5. 29012300  |
| C | -4. 31372600 | -1. 02730200 | 0. 34843900  |
| H | -7. 83930600 | 0. 46967300  | 0. 98843300  |
| H | -1. 37066200 | -3. 85498500 | 5. 55047000  |
| C | -6. 32815500 | -0. 24280400 | 3. 36622000  |
| H | -7. 09356000 | -0. 96532600 | 3. 68170500  |
| H | -6. 69755300 | 0. 74877500  | 3. 65206100  |
| C | -3. 97682500 | -3. 54261300 | 4. 32432300  |
| C | -4. 80274300 | -2. 98130700 | 3. 14975100  |
| H | -5. 88298000 | -3. 00989300 | 3. 32094100  |
| H | -4. 59343900 | -3. 55710100 | 2. 24085400  |
| C | 0. 74666900  | -0. 25999700 | 3. 54218500  |
| C | 0. 67436400  | 1. 08270400  | 3. 99444400  |
| C | 1. 99659100  | -0. 81942600 | 3. 17439300  |
| C | -0. 54185100 | 1. 69734500  | 4. 43770000  |
| C | 1. 88111400  | 1. 87735500  | 4. 06091000  |
| C | 3. 19867300  | -0. 02535200 | 3. 28969400  |
| C | -0. 57207600 | 2. 99864500  | 4. 87015900  |
| H | -1. 45507000 | 1. 11383200  | 4. 44069800  |
| C | 1. 80421600  | 3. 23489800  | 4. 50669200  |
| C | 3. 10710000  | 1. 30193400  | 3. 71600500  |
| C | 0. 61378300  | 3. 78720100  | 4. 89593300  |
| H | -1. 51008500 | 3. 43327700  | 5. 20598800  |

|   |              |              |              |
|---|--------------|--------------|--------------|
| H | 2. 72215100  | 3. 81689200  | 4. 53545500  |
| H | 4. 01232300  | 1. 90035400  | 3. 78333100  |
| H | 0. 56971200  | 4. 81782700  | 5. 23694200  |
| C | -4. 77883900 | -0. 96878100 | -2. 18534500 |
| C | -4. 55300900 | -2. 29139200 | -2. 64605600 |
| C | -4. 82792400 | 0. 10735900  | -3. 10795800 |
| C | -4. 52398900 | -3. 43066000 | -1. 77965300 |
| C | -4. 37842600 | -2. 53096400 | -4. 06110700 |
| C | -4. 70069700 | -0. 15722400 | -4. 52362000 |
| C | -4. 29426800 | -4. 69212600 | -2. 26240900 |
| H | -4. 69083000 | -3. 29132900 | -0. 71863400 |
| C | -4. 13799900 | -3. 86227800 | -4. 52403900 |
| C | -4. 47614500 | -1. 46523100 | -4. 95914700 |
| C | -4. 08880000 | -4. 91550100 | -3. 65284400 |
| H | -4. 27095900 | -5. 53486500 | -1. 57680600 |
| H | -3. 99677700 | -4. 01660200 | -5. 59106700 |
| H | -4. 37058800 | -1. 65899800 | -6. 02467500 |
| H | -3. 90206600 | -5. 92237900 | -4. 01575500 |
| C | 3. 36411900  | -2. 69023800 | 2. 39798700  |
| H | 3. 44195100  | -3. 70657100 | 2. 02183200  |
| C | 2. 13364400  | -2. 16092300 | 2. 69000300  |
| H | 1. 24246200  | -2. 75516600 | 2. 53598100  |
| C | 4. 54936500  | -1. 91646400 | 2. 55709200  |
| H | 5. 51016400  | -2. 35951900 | 2. 31450900  |
| C | 4. 46290500  | -0. 61680500 | 2. 97621400  |
| H | 5. 35438200  | -0. 00270800 | 3. 07329900  |
| C | -5. 02482500 | 2. 49159900  | -3. 62116000 |
| H | -5. 11823500 | 3. 51919500  | -3. 27998400 |
| C | -4. 95084300 | 2. 21787900  | -5. 01682600 |
| H | -5. 01042400 | 3. 03470600  | -5. 73105600 |
| C | -4. 78558800 | 0. 92995800  | -5. 44955900 |
| H | -4. 70448700 | 0. 70705200  | -6. 51090800 |
| C | -4. 96651000 | 1. 47586200  | -2. 70166500 |
| H | -4. 99567000 | 1. 70912600  | -1. 64369700 |
| C | -0. 93025400 | 4. 17302600  | -0. 13072000 |
| C | -1. 68907900 | 4. 80053100  | -1. 13222800 |
| C | -1. 54198900 | 4. 01451200  | 1. 12413700  |
| C | -3. 00721400 | 5. 20510000  | -0. 91101100 |
| H | -1. 25624800 | 4. 99261300  | -2. 10837100 |
| C | -2. 85670300 | 4. 42160300  | 1. 35300000  |
| H | -0. 99583800 | 3. 57618400  | 1. 95295400  |
| C | -3. 60295800 | 5. 01309200  | 0. 33449200  |
| H | -3. 56123300 | 5. 68126900  | -1. 71622900 |
| H | -3. 29500300 | 4. 27138800  | 2. 33618600  |

|   |             |             |             |
|---|-------------|-------------|-------------|
| H | -4.62817400 | 5.32728900  | 0.51080100  |
| C | 1.28715200  | 6.37523400  | -0.58349800 |
| C | 0.35657800  | 7.27760300  | -0.22819400 |
| H | -0.30907100 | 7.00595700  | 0.59139400  |
| C | -1.32325900 | 0.88207600  | -3.63948600 |
| H | -1.19146700 | 1.30935000  | -4.64280100 |
| H | -0.79039400 | -0.06995600 | -3.59704700 |
| H | -2.38015800 | 0.66177800  | -3.50740300 |
| C | 0.08840800  | 8.63768400  | -0.80837700 |
| H | -0.94718500 | 8.70344600  | -1.16978500 |
| H | 0.19792000  | 9.41705200  | -0.04149500 |
| H | 0.74779400  | 8.89612700  | -1.64098600 |
| C | 1.50255300  | 1.46294600  | -3.23962000 |
| H | 2.52346300  | 1.73527500  | -2.97101300 |
| H | 1.37120200  | 0.38284500  | -3.11637700 |
| H | 1.36064200  | 1.66141400  | -4.31329900 |
| C | 2.33285600  | 6.61923700  | -1.65048900 |
| H | 3.33944200  | 6.55219100  | -1.21630900 |
| H | 2.29794500  | 5.86819800  | -2.44916600 |
| H | 2.23925200  | 7.60080800  | -2.12086300 |

TS-1-2-6SS-1

l imaginary frequency

H = -5393.904964

G = -5394.115235

E(M06-2X-DCM) = -5394.838806

|   |             |             |             |
|---|-------------|-------------|-------------|
| O | -1.89613300 | 0.58415000  | 1.87153700  |
| O | -3.09620500 | -1.23188700 | 0.42510900  |
| P | -1.87745200 | -0.15428900 | 0.42466100  |
| O | -2.09189400 | 0.96771300  | -0.58639100 |
| N | -0.49248200 | -0.97434100 | 0.34741800  |
| S | -0.14609700 | -2.19203900 | -0.61883300 |
| C | -0.41629600 | -3.72217600 | 0.42781100  |
| F | -0.23585400 | -4.80615700 | -0.32743100 |
| F | 0.46010600  | -3.74795000 | 1.44045700  |
| F | -1.65473700 | -3.73497000 | 0.92945400  |
| C | 1.01675800  | 3.58423400  | -1.65128500 |
| C | 1.10313000  | 2.69628000  | -2.93846600 |
| H | 0.82352000  | 3.32236400  | -3.79723600 |
| H | 2.15800400  | 2.44628900  | -3.07542100 |
| C | 0.28236000  | 1.44220600  | -3.09510400 |
| C | 1.40217500  | 2.68800600  | -0.40773600 |
| H | 0.50567900  | 2.47542100  | 0.17275400  |
| H | 2.09908100  | 3.22146800  | 0.23830300  |



|   |              |              |              |
|---|--------------|--------------|--------------|
| N | 1. 95551400  | 1. 35942000  | -0. 69433200 |
| C | 3. 29278400  | 1. 06215600  | -0. 81666500 |
| N | 3. 50556300  | -0. 28906800 | -0. 91006300 |
| C | 4. 68723600  | -1. 05577700 | -0. 93539800 |
| C | 5. 95034300  | -0. 59149000 | -1. 33136300 |
| C | 4. 54661300  | -2. 40131600 | -0. 55801100 |
| C | 7. 04219000  | -1. 46082900 | -1. 30830800 |
| C | 5. 65153300  | -3. 24713900 | -0. 52944600 |
| H | 3. 56970000  | -2. 77877600 | -0. 27583400 |
| C | 6. 91459600  | -2. 78781600 | -0. 89906300 |
| H | 7. 77459300  | -3. 44477500 | -0. 86855900 |
| C | 5. 45845900  | -4. 64721500 | -0. 01320400 |
| C | 8. 37792700  | -0. 96598800 | -1. 80059700 |
| F | 5. 22799900  | -4. 64760200 | 1. 32670500  |
| F | 6. 53742300  | -5. 42789600 | -0. 22763100 |
| F | 4. 39530300  | -5. 25239700 | -0. 58454500 |
| F | 9. 40353000  | -1. 62688200 | -1. 21665500 |
| F | 8. 55291700  | 0. 34975200  | -1. 55924700 |
| F | 8. 50974400  | -1. 14230000 | -3. 13697100 |
| S | 4. 48740900  | 2. 24702200  | -0. 87604500 |
| C | 2. 07911700  | 4. 73231300  | -1. 91704300 |
| H | 3. 06835000  | 4. 26574100  | -1. 86288700 |
| H | 1. 93294700  | 5. 05882900  | -2. 95315000 |
| H | 6. 07919800  | 0. 43702700  | -1. 63348400 |
| C | -1. 10751100 | 1. 42856400  | -2. 97518800 |
| H | 2. 67242500  | -0. 87505900 | -0. 81680800 |
| H | -1. 56248400 | 2. 42025900  | -2. 92570900 |
| O | 1. 31249100  | -2. 19718200 | -0. 86302600 |
| H | 1. 35793000  | 0. 59309200  | -0. 39003000 |
| O | -1. 02544400 | -2. 35071500 | -1. 78571100 |
| H | -1. 38349500 | 1. 13851800  | -1. 70925500 |
| C | -7. 05521400 | 0. 05898000  | 0. 98683500  |
| C | -6. 17351000 | -0. 01990800 | 2. 05815600  |
| C | -4. 88544400 | -0. 54847700 | 1. 88302600  |
| C | -5. 33000200 | -0. 86474600 | -0. 49485700 |
| C | -6. 64206300 | -0. 41039000 | -0. 25678400 |
| C | -1. 71493600 | -0. 16216800 | 3. 05095000  |
| C | -2. 78755100 | -0. 89077600 | 3. 56349400  |
| C | -2. 57343300 | -1. 76046200 | 4. 64521400  |
| C | -1. 33905400 | -1. 81238300 | 5. 28026200  |
| C | -0. 32227700 | -0. 97114600 | 4. 83830200  |
| C | -0. 47362100 | -0. 13602600 | 3. 71572400  |
| H | -7. 34222600 | -0. 42072400 | -1. 08588600 |
| H | 0. 62999200  | -0. 95741000 | 5. 35869800  |

|   |             |             |             |
|---|-------------|-------------|-------------|
| C | -4.27659600 | -0.83856100 | 3.24836500  |
| C | -4.99149700 | 0.25379900  | 4.11226800  |
| H | -4.99485600 | 0.00691200  | 5.17810900  |
| H | -4.45696700 | 1.20315400  | 3.99141400  |
| H | -3.62877800 | -3.61082400 | 5.10879800  |
| H | -4.29618600 | -2.18217700 | 5.89080000  |
| C | -4.43970000 | -0.85814500 | 0.59853400  |
| H | -8.06221100 | 0.44657100  | 1.11862000  |
| H | -1.17208600 | -2.47775600 | 6.12336500  |
| C | -6.40504000 | 0.36600100  | 3.50260600  |
| H | -7.10983000 | -0.32156500 | 3.99020600  |
| H | -6.82976700 | 1.37153600  | 3.60277500  |
| C | -3.82729300 | -2.54271600 | 4.96457400  |
| C | -4.71495500 | -2.26211800 | 3.73593100  |
| H | -5.78684600 | -2.31941800 | 3.94714200  |
| H | -4.49090500 | -2.98693600 | 2.94469400  |
| C | 0.66429700  | 0.77799700  | 3.39018900  |
| C | 0.51389000  | 2.17736700  | 3.57445100  |
| C | 1.94159900  | 0.23015600  | 3.10828100  |
| C | -0.73546700 | 2.79653800  | 3.90512400  |
| C | 1.67422200  | 3.03550700  | 3.48103900  |
| C | 3.09430500  | 1.09985400  | 3.04339400  |
| C | -0.83768300 | 4.15021000  | 4.09834200  |
| H | -1.61727900 | 2.17710900  | 4.01513400  |
| C | 1.52514400  | 4.44250200  | 3.69435000  |
| C | 2.92882300  | 2.47531800  | 3.22343700  |
| C | 0.30596500  | 4.99090300  | 3.98877200  |
| H | -1.80031700 | 4.58705300  | 4.35094500  |
| H | 2.41208900  | 5.06734300  | 3.62498300  |
| H | 3.80059700  | 3.12392400  | 3.17513200  |
| H | 0.20787700  | 6.06072500  | 4.15077200  |
| C | -5.01447800 | -1.39171000 | -1.85736400 |
| C | -4.64008800 | -2.75025700 | -2.02976400 |
| C | -5.23698800 | -0.56760300 | -2.99122700 |
| C | -4.45951200 | -3.66041900 | -0.93978700 |
| C | -4.46606300 | -3.27734000 | -3.36479700 |
| C | -5.10368000 | -1.12477600 | -4.31862300 |
| C | -4.08681200 | -4.96256100 | -1.14633100 |
| H | -4.62675100 | -3.31253800 | 0.07183100  |
| C | -4.07165400 | -4.64080000 | -3.53793300 |
| C | -4.71412200 | -2.45754700 | -4.46813900 |
| C | -3.87810400 | -5.46254500 | -2.46205900 |
| H | -3.94988000 | -5.62394100 | -0.29522000 |
| H | -3.93313300 | -5.00973800 | -4.55135600 |

|   |             |             |             |
|---|-------------|-------------|-------------|
| H | -4.60383400 | -2.86901000 | -5.46946400 |
| H | -3.57565400 | -6.49615500 | -2.60517200 |
| C | 3.41463900  | -1.67591200 | 2.69092400  |
| H | 3.55417300  | -2.74051800 | 2.52524500  |
| C | 2.15600700  | -1.17103800 | 2.89323700  |
| H | 1.30130600  | -1.83510300 | 2.87514500  |
| C | 4.55029800  | -0.81630700 | 2.66760300  |
| H | 5.53771300  | -1.23747000 | 2.50334800  |
| C | 4.38902100  | 0.53335700  | 2.82167300  |
| H | 5.24219300  | 1.20462300  | 2.77479700  |
| C | -5.78917000 | 1.58919900  | -4.01122200 |
| H | -6.02884600 | 2.64361600  | -3.90243800 |
| C | -5.69962300 | 1.02095900  | -5.31358500 |
| H | -5.88916700 | 1.63913200  | -6.18687100 |
| C | -5.35703300 | -0.29621700 | -5.45692900 |
| H | -5.26426600 | -0.74111500 | -6.44498000 |
| C | -5.56413600 | 0.82571300  | -2.89428900 |
| H | -5.61006600 | 1.28655300  | -1.91466600 |
| C | -0.35678900 | 4.26993100  | -1.48198100 |
| C | -0.96066700 | 4.90439200  | -2.58410200 |
| C | -1.00410400 | 4.39754000  | -0.24464100 |
| C | -2.16407200 | 5.59659200  | -2.46665000 |
| H | -0.48608500 | 4.86749500  | -3.56102000 |
| C | -2.20910900 | 5.09498800  | -0.11991600 |
| H | -0.58434000 | 3.96567700  | 0.65616900  |
| C | -2.80117400 | 5.69311300  | -1.22812800 |
| H | -2.60083200 | 6.06421800  | -3.34546200 |
| H | -2.67951500 | 5.16211200  | 0.85727900  |
| H | -3.74039900 | 6.23091900  | -1.13148500 |
| C | 2.05864800  | 5.97258500  | -1.04207600 |
| C | 1.69019700  | 7.14697100  | -1.58086000 |
| H | 1.38238100  | 7.14205400  | -2.62740100 |
| C | -1.94014400 | 0.37762500  | -3.70803400 |
| H | -1.76023000 | 0.42658700  | -4.78971500 |
| H | -1.73627200 | -0.64130300 | -3.37035200 |
| H | -2.99462900 | 0.58160600  | -3.53392700 |
| C | 1.62762900  | 8.50032000  | -0.93102300 |
| H | 2.22366400  | 9.23254500  | -1.49287800 |
| H | 0.59539700  | 8.87758200  | -0.92505900 |
| H | 1.98278300  | 8.50227200  | 0.10273000  |
| C | 0.99708800  | 0.22723400  | -3.59682700 |
| H | 2.05118000  | 0.21394900  | -3.31673200 |
| H | 0.51550100  | -0.70303900 | -3.28519400 |
| H | 0.94355100  | 0.24858500  | -4.69827300 |

|   |             |             |             |
|---|-------------|-------------|-------------|
| C | 2. 52393900 | 5. 81924100 | 0. 38664600 |
| H | 1. 74988200 | 5. 36486400 | 1. 01851400 |
| H | 3. 40541200 | 5. 16879800 | 0. 43973600 |
| H | 2. 78564700 | 6. 77723800 | 0. 84384300 |

TS-1-2-6SS-2

l imaginary frequency

H = -5393.906650

G = -5394.116764

E(M06-2X-DCM) = -5394.841582

|   |              |              |              |
|---|--------------|--------------|--------------|
| O | -1. 99579100 | 0. 98371300  | 1. 61525300  |
| O | -3. 13697100 | -1. 11288400 | 0. 55571200  |
| P | -1. 92323800 | -0. 04853000 | 0. 36015700  |
| O | -2. 12168200 | 0. 82221500  | -0. 87605800 |
| N | -0. 53372300 | -0. 84877900 | 0. 50892900  |
| S | -0. 15886500 | -2. 23018200 | -0. 19303800 |
| C | -0. 47001300 | -3. 52759300 | 1. 12209300  |
| F | -0. 24510800 | -4. 73623800 | 0. 60576900  |
| F | 0. 35781600  | -3. 33697300 | 2. 15821100  |
| F | -1. 73025600 | -3. 46288400 | 1. 56081000  |
| C | 1. 07910000  | 3. 32796400  | -2. 11759900 |
| C | 1. 20604000  | 2. 28995100  | -3. 28871900 |
| H | 0. 91698300  | 2. 80449300  | -4. 21606400 |
| H | 2. 26715900  | 2. 04987900  | -3. 38433500 |
| C | 0. 41919300  | 1. 00168300  | -3. 28581700 |
| C | 1. 60058000  | 2. 66360100  | -0. 78761400 |
| H | 0. 82969000  | 2. 66979100  | -0. 02171200 |
| H | 2. 43041100  | 3. 25743400  | -0. 40394200 |
| N | 2. 03633000  | 1. 26429500  | -0. 86756800 |
| C | 3. 34537800  | 0. 87031100  | -1. 02216900 |
| N | 3. 50922300  | -0. 47232200 | -0. 80924300 |
| C | 4. 66159500  | -1. 27806900 | -0. 71494000 |
| C | 5. 91771800  | -0. 97596400 | -1. 26224900 |
| C | 4. 49725400  | -2. 49117100 | -0. 02624100 |
| C | 6. 97927600  | -1. 86436600 | -1. 08302000 |
| C | 5. 57292700  | -3. 35619100 | 0. 15201400  |
| H | 3. 52432100  | -2. 74980100 | 0. 37690800  |
| C | 6. 82923100  | -3. 05311200 | -0. 36937000 |
| H | 7. 66735400  | -3. 72228500 | -0. 22198300 |
| C | 5. 35180500  | -4. 59442900 | 0. 97804600  |
| C | 8. 30378100  | -1. 55706800 | -1. 73313100 |
| F | 5. 08381500  | -4. 27810700 | 2. 27247900  |
| F | 6. 42731000  | -5. 40846800 | 0. 98393300  |
| F | 4. 29808600  | -5. 31298800 | 0. 53430200  |

|   |             |             |             |
|---|-------------|-------------|-------------|
| F | 9.33554700  | -2.10739600 | -1.05315800 |
| F | 8.53398000  | -0.23025700 | -1.81590300 |
| F | 8.36204800  | -2.04631600 | -2.99471500 |
| S | 4.56491100  | 1.94254700  | -1.47516600 |
| C | 2.06818200  | 4.49592900  | -2.52242000 |
| H | 3.03430500  | 4.02539900  | -2.72110600 |
| H | 1.71146400  | 4.91444600  | -3.47333300 |
| H | 6.06525000  | -0.05238200 | -1.80151000 |
| C | -0.97435100 | 0.95511700  | -3.22609700 |
| H | 2.66392300  | -0.98696000 | -0.55143600 |
| H | -1.46378500 | 1.92146200  | -3.36329700 |
| O | 1.30745000  | -2.28136800 | -0.37542900 |
| H | 1.42422300  | 0.60615500  | -0.38939000 |
| O | -0.99591900 | -2.61041200 | -1.33876600 |
| H | -1.32885700 | 0.85935200  | -1.94249000 |
| C | -7.10892600 | 0.24523500  | 0.68122400  |
| C | -6.27371500 | 0.38416000  | 1.78357000  |
| C | -4.97976200 | -0.15808900 | 1.76894200  |
| C | -5.32347800 | -0.93656500 | -0.51815000 |
| C | -6.64302400 | -0.45190700 | -0.43037800 |
| C | -1.85391800 | 0.50419900  | 2.93090000  |
| C | -2.93880000 | -0.11628100 | 3.54947400  |
| C | -2.75358400 | -0.74075500 | 4.79402300  |
| C | -1.54036000 | -0.64428500 | 5.46384600  |
| C | -0.51440900 | 0.10079800  | 4.88935900  |
| C | -0.63534500 | 0.68337500  | 3.61465300  |
| H | -7.30541700 | -0.62359800 | -1.27282400 |
| H | 0.42060200  | 0.23380300  | 5.42426100  |
| C | -4.41770100 | -0.15418600 | 3.18404400  |
| C | -5.17168100 | 1.08158700  | 3.78095300  |
| H | -5.21314200 | 1.05777800  | 4.87400000  |
| H | -4.63921000 | 1.99372000  | 3.48727100  |
| H | -3.80719200 | -2.47230000 | 5.59610500  |
| H | -4.51401600 | -0.92423300 | 6.04512600  |
| C | -4.48357400 | -0.71605400 | 0.59191100  |
| H | -8.11998500 | 0.64437800  | 0.69219000  |
| H | -1.39698800 | -1.12003200 | 6.43054800  |
| C | -6.56248800 | 1.04799400  | 3.11209000  |
| H | -7.27892100 | 0.46072000  | 3.70297100  |
| H | -6.99903300 | 2.04652600  | 2.99435700  |
| C | -4.01065400 | -1.46016600 | 5.22838500  |
| C | -4.85876000 | -1.45334800 | 3.94097100  |
| H | -5.93661800 | -1.48321500 | 4.12610000  |
| H | -4.60107900 | -2.32191500 | 3.32393800  |

|   |             |             |             |
|---|-------------|-------------|-------------|
| C | 0.50341000  | 1.52495900  | 3.13434400  |
| C | 0.33431500  | 2.92962200  | 3.01786800  |
| C | 1.79022700  | 0.94766300  | 2.98645300  |
| C | -0.92540200 | 3.58696200  | 3.20632900  |
| C | 1.48227100  | 3.76429300  | 2.74038700  |
| C | 2.93288800  | 1.80109800  | 2.74865800  |
| C | -1.04945900 | 4.94725000  | 3.08696400  |
| H | -1.79557800 | 2.99350100  | 3.46039900  |
| C | 1.30798300  | 5.17867700  | 2.61576800  |
| C | 2.74715500  | 3.18039600  | 2.62526800  |
| C | 0.07880700  | 5.75838800  | 2.77710000  |
| H | -2.01845400 | 5.41537900  | 3.23928800  |
| H | 2.18240600  | 5.78489400  | 2.39425600  |
| H | 3.61021000  | 3.81593200  | 2.43964600  |
| H | -0.03947500 | 6.83418300  | 2.68237100  |
| C | -4.94121500 | -1.70740200 | -1.74010600 |
| C | -4.57263300 | -3.07403700 | -1.63638100 |
| C | -5.08798100 | -1.10632900 | -3.01700100 |
| C | -4.46408000 | -3.76576700 | -0.38789300 |
| C | -4.32798300 | -3.83896500 | -2.83850000 |
| C | -4.88478900 | -1.89923500 | -4.20872000 |
| C | -4.09511800 | -5.08385900 | -0.32790300 |
| H | -4.68380000 | -3.23530000 | 0.53026400  |
| C | -3.94006000 | -5.21112900 | -2.73301800 |
| C | -4.50240500 | -3.23695200 | -4.08672800 |
| C | -3.81790100 | -5.81925500 | -1.51417700 |
| H | -4.01425600 | -5.57625900 | 0.63730700  |
| H | -3.74764600 | -5.76165300 | -3.65074200 |
| H | -4.33920700 | -3.82633600 | -4.98677700 |
| H | -3.51966700 | -6.86170100 | -1.44572500 |
| C | 3.28956000  | -0.98357000 | 2.98076400  |
| H | 3.44318600  | -2.05753000 | 3.04086200  |
| C | 2.02329800  | -0.46472900 | 3.06938400  |
| H | 1.17690700  | -1.12978800 | 3.18537000  |
| C | 4.41462600  | -0.13217500 | 2.78384900  |
| H | 5.40833900  | -0.56449700 | 2.71329900  |
| C | 4.23614600  | 1.21824800  | 2.65639700  |
| H | 5.08208600  | 1.87614600  | 2.47608800  |
| C | -5.56147200 | 0.82411800  | -4.44683200 |
| H | -5.79737400 | 1.88011100  | -4.54856000 |
| C | -5.40316100 | 0.02526300  | -5.61470700 |
| H | -5.53710400 | 0.47130400  | -6.59645300 |
| C | -5.06488200 | -1.29525400 | -5.49292200 |
| H | -4.92012700 | -1.91461800 | -6.37508600 |

|   |             |             |             |
|---|-------------|-------------|-------------|
| C | -5.40681200 | 0.28046900  | -3.19717300 |
| H | -5.50368100 | 0.91380500  | -2.32329100 |
| C | -0.35783000 | 3.89893700  | -2.03302200 |
| C | -0.92095700 | 4.48328100  | -3.18620600 |
| C | -1.14035800 | 3.91897300  | -0.87120900 |
| C | -2.19529800 | 5.04482400  | -3.18318800 |
| H | -0.35601100 | 4.50631900  | -4.11421700 |
| C | -2.41915500 | 4.48553300  | -0.86054700 |
| H | -0.78433700 | 3.49867400  | 0.06038900  |
| C | -2.95675600 | 5.05056900  | -2.01232700 |
| H | -2.59075500 | 5.48115800  | -4.09695000 |
| H | -2.98891400 | 4.47258000  | 0.06419400  |
| H | -3.95128600 | 5.48822200  | -2.00294200 |
| C | 2.29148500  | 5.64320700  | -1.54791100 |
| C | 3.48831600  | 5.74676000  | -0.94171000 |
| H | 4.22074500  | 4.96688900  | -1.14813600 |
| C | -1.73270200 | -0.23707300 | -3.80916200 |
| H | -1.50387900 | -0.35837200 | -4.87609900 |
| H | -1.50642400 | -1.17696400 | -3.29942300 |
| H | -2.80160200 | -0.05705500 | -3.71281600 |
| C | 3.97253900  | 6.81513100  | -0.00141100 |
| H | 4.29220300  | 6.37466900  | 0.95348700  |
| H | 4.85652300  | 7.32235000  | -0.41246500 |
| H | 3.22182500  | 7.57814700  | 0.22041100  |
| C | 1.18049900  | -0.25723800 | -3.56566600 |
| H | 2.24383700  | -0.16985600 | -3.34335200 |
| H | 0.76131600  | -1.12214900 | -3.04272400 |
| H | 1.07428600  | -0.47590700 | -4.64098500 |
| C | 1.18284400  | 6.65961200  | -1.38508500 |
| H | 0.73096800  | 6.90124500  | -2.35473500 |
| H | 0.37206300  | 6.28332400  | -0.75100600 |
| H | 1.54156900  | 7.59337300  | -0.94436400 |

TS-1-2-6SS-3

l imaginary frequency

H = -5393.908460

G = -5394.117590

E(M06-2X-DCM) = -5394.842992

|   |             |             |             |
|---|-------------|-------------|-------------|
| O | -1.77632800 | -0.01552700 | 1.93738500  |
| O | -3.02337100 | -1.41918500 | 0.12175900  |
| P | -1.75826900 | -0.42903000 | 0.36461000  |
| O | -1.92220600 | 0.89371200  | -0.38312200 |
| N | -0.39779700 | -1.25314000 | 0.13116100  |
| S | -0.02738800 | -2.14414000 | -1.14259200 |

|   |             |             |             |
|---|-------------|-------------|-------------|
| C | -0.25390400 | -3.90181200 | -0.54282800 |
| F | -0.02256000 | -4.74027900 | -1.55354100 |
| F | 0.60036700  | -4.17638500 | 0.45153900  |
| F | -1.50283800 | -4.07395400 | -0.10111400 |
| C | 0.59482600  | 3.81213700  | -0.20928600 |
| C | 0.99265300  | 3.54625400  | -1.68979200 |
| H | 0.69115500  | 4.41258300  | -2.29417700 |
| H | 2.08437700  | 3.53729900  | -1.71410000 |
| C | 0.50171400  | 2.31340100  | -2.40883000 |
| C | 1.02577900  | 2.55865200  | 0.66447700  |
| H | 0.14253100  | 2.11773700  | 1.12337000  |
| H | 1.68827000  | 2.89183400  | 1.46529600  |
| N | 1.67627800  | 1.44417800  | -0.03368300 |
| C | 3.03580700  | 1.29189000  | -0.18052000 |
| N | 3.36672300  | 0.04497600  | -0.64114000 |
| C | 4.61555100  | -0.55333200 | -0.90563100 |
| C | 5.79489200  | 0.13839000  | -1.21762700 |
| C | 4.63681600  | -1.95669500 | -0.88449100 |
| C | 6.96862800  | -0.57577700 | -1.46420100 |
| C | 5.82168300  | -2.64875500 | -1.11760100 |
| H | 3.72438700  | -2.50231500 | -0.67188900 |
| C | 7.00375300  | -1.96840500 | -1.40567500 |
| H | 7.92634400  | -2.50813400 | -1.57838500 |
| C | 5.81544400  | -4.14409100 | -0.95465200 |
| C | 8.20980600  | 0.17817400  | -1.86625200 |
| F | 5.75186800  | -4.49277900 | 0.35991000  |
| F | 6.92497900  | -4.72132800 | -1.45968900 |
| F | 4.74804700  | -4.71401900 | -1.55209000 |
| F | 9.33528100  | -0.48613200 | -1.51821300 |
| F | 8.26785100  | 1.40091200  | -1.29879700 |
| F | 8.26441900  | 0.36390700  | -3.20702300 |
| S | 4.12611200  | 2.53527900  | 0.14263700  |
| C | 1.45314200  | 5.03863900  | 0.30748300  |
| H | 1.25409600  | 5.11640300  | 1.38426800  |
| H | 2.50197600  | 4.74569100  | 0.20658400  |
| H | 5.79960200  | 1.21764200  | -1.24683200 |
| C | -0.83994500 | 1.95157100  | -2.52342100 |
| H | 2.59557800  | -0.61930400 | -0.74527800 |
| H | -1.54893900 | 2.74796100  | -2.28476200 |
| O | 1.42683900  | -2.02281000 | -1.38705000 |
| H | 1.13494600  | 0.58073100  | -0.02218200 |
| O | -0.92780400 | -2.01528600 | -2.29440700 |
| H | -1.19698600 | 1.33066100  | -1.37255700 |
| C | -6.87015500 | 0.13452000  | 0.78536700  |



|   |             |             |             |
|---|-------------|-------------|-------------|
| C | -6.07352700 | -0.27248400 | 1.84916100  |
| C | -4.83096100 | -0.88059600 | 1.61583900  |
| C | -5.14578600 | -0.61970100 | -0.78899400 |
| C | -6.41942300 | -0.08537400 | -0.51347200 |
| C | -1.70604700 | -1.00221900 | 2.94024600  |
| C | -2.85352700 | -1.73130300 | 3.25471500  |
| C | -2.75636300 | -2.81923300 | 4.13742700  |
| C | -1.56140700 | -3.10219700 | 4.78693700  |
| C | -0.46555000 | -2.27403600 | 4.56377500  |
| C | -0.50031000 | -1.21490300 | 3.63773300  |
| H | -7.05519300 | 0.17335600  | -1.35423000 |
| H | 0.45936300  | -2.44602000 | 5.10504100  |
| C | -4.31905200 | -1.49495500 | 2.91048100  |
| C | -4.99156000 | -0.54425800 | 3.95733900  |
| H | -5.07320400 | -1.00406500 | 4.94680800  |
| H | -4.37738600 | 0.35808300  | 4.05825000  |
| H | -3.96610500 | -4.63243800 | 4.17149400  |
| H | -4.56124500 | -3.34610500 | 5.21492200  |
| C | -4.33891700 | -0.95726400 | 0.31444600  |
| H | -7.84121600 | 0.59187100  | 0.95719300  |
| H | -1.48500100 | -3.93861500 | 5.47686400  |
| C | -6.35594200 | -0.18189800 | 3.33272700  |
| H | -7.13750600 | -0.89343200 | 3.63315700  |
| H | -6.70696200 | 0.81251300  | 3.63163300  |
| C | -4.07832000 | -3.54495100 | 4.24799700  |
| C | -4.88575700 | -2.94566200 | 3.07953100  |
| H | -5.96725100 | -2.95405100 | 3.24477100  |
| H | -4.68400900 | -3.50994200 | 2.16175100  |
| C | 0.71954700  | -0.35342500 | 3.54743300  |
| C | 0.67682400  | 0.97830500  | 4.03420700  |
| C | 1.95693500  | -0.93114600 | 3.16617200  |
| C | -0.52599800 | 1.60820700  | 4.49240000  |
| C | 1.90099400  | 1.74366700  | 4.12199400  |
| C | 3.17629900  | -0.16714300 | 3.30151000  |
| C | -0.52755800 | 2.89797600  | 4.95918900  |
| H | -1.45201600 | 1.04527500  | 4.47908100  |
| C | 1.85400400  | 3.09034600  | 4.60341500  |
| C | 3.11407700  | 1.15033800  | 3.76217300  |
| C | 0.67576500  | 3.65867200  | 5.00664900  |
| H | -1.45593100 | 3.34455000  | 5.30598800  |
| H | 2.78479700  | 3.65050300  | 4.64825400  |
| H | 4.03226200  | 1.72667200  | 3.84468800  |
| H | 0.65443600  | 4.68045200  | 5.37538900  |
| C | -4.78700600 | -0.85421000 | -2.22041900 |

|   |             |             |             |
|---|-------------|-------------|-------------|
| C | -4.57593900 | -2.17356000 | -2.69744600 |
| C | -4.81410800 | 0.23482000  | -3.12878600 |
| C | -4.57151200 | -3.32507000 | -1.84690000 |
| C | -4.39149800 | -2.39622400 | -4.11398700 |
| C | -4.67757800 | -0.01234200 | -4.54674000 |
| C | -4.35484500 | -4.58290200 | -2.34497400 |
| H | -4.74708700 | -3.19824600 | -0.78572400 |
| C | -4.16515200 | -3.72424200 | -4.59316000 |
| C | -4.46610300 | -1.31711700 | -4.99809000 |
| C | -4.13895300 | -4.78999400 | -3.73633100 |
| H | -4.35027100 | -5.43526100 | -1.67098200 |
| H | -4.01589200 | -3.86574200 | -5.66086600 |
| H | -4.35298600 | -1.49771000 | -6.06514600 |
| H | -3.96277200 | -5.79429500 | -4.11145000 |
| C | 3.28245500  | -2.81120800 | 2.34121900  |
| H | 3.33748500  | -3.81884200 | 1.93856400  |
| C | 2.06410800  | -2.26265000 | 2.64814200  |
| H | 1.15986800  | -2.83280500 | 2.47986000  |
| C | 4.48452800  | -2.06816200 | 2.51920600  |
| H | 5.43518900  | -2.52583100 | 2.26421000  |
| C | 4.42706500  | -0.77828000 | 2.97222600  |
| H | 5.33204300  | -0.18697300 | 3.08471000  |
| C | -4.97841900 | 2.62785100  | -3.61211200 |
| H | -5.06391000 | 3.65191100  | -3.25835600 |
| C | -4.89484900 | 2.37192000  | -5.01057100 |
| H | -4.93835300 | 3.19877700  | -5.71432700 |
| C | -4.74073500 | 1.08796000  | -5.45880600 |
| H | -4.65257200 | 0.87809000  | -6.52224000 |
| C | -4.93987100 | 1.59948700  | -2.70568600 |
| H | -4.97609700 | 1.81910200  | -1.64503100 |
| C | -0.88918900 | 4.17522300  | -0.00535100 |
| C | -1.64346800 | 4.81625100  | -1.00236000 |
| C | -1.50289900 | 4.00337400  | 1.24655600  |
| C | -2.95707000 | 5.23164200  | -0.77547000 |
| H | -1.20611700 | 5.01688800  | -1.97487300 |
| C | -2.81466700 | 4.41793200  | 1.47913200  |
| H | -0.95979100 | 3.55045900  | 2.06946200  |
| C | -3.55462400 | 5.02991700  | 0.46809200  |
| H | -3.50713700 | 5.72230800  | -1.57462500 |
| H | -3.25529500 | 4.25940300  | 2.45996100  |
| H | -4.57683400 | 5.35152200  | 0.64813600  |
| C | 1.23257300  | 6.40180500  | -0.33226700 |
| C | 1.93908700  | 6.74922700  | -1.42305500 |
| H | 2.65357700  | 6.01942500  | -1.80687200 |

|   |             |            |             |
|---|-------------|------------|-------------|
| C | -1.29566700 | 0.99834000 | -3.62095700 |
| H | -1.15389600 | 1.45158000 | -4.61147100 |
| H | -0.77030800 | 0.04144700 | -3.60100300 |
| H | -2.35510200 | 0.78231900 | -3.50209800 |
| C | 1.91126800  | 8.04181700 | -2.19078700 |
| H | 2.88855000  | 8.54231800 | -2.14452300 |
| H | 1.70848800  | 7.86004300 | -3.25521400 |
| H | 1.16016100  | 8.74682100 | -1.82573100 |
| C | 1.52931900  | 1.54194800 | -3.18528500 |
| H | 2.55130700  | 1.79702300 | -2.90420600 |
| H | 1.38715500  | 0.46030500 | -3.09029400 |
| H | 1.39524100  | 1.76882400 | -4.25422000 |
| C | 0.28746000  | 7.33205300 | 0.39387700  |
| H | -0.68493700 | 6.86294400 | 0.57309300  |
| H | 0.70151800  | 7.58369500 | 1.38099000  |
| H | 0.11603100  | 8.27074400 | -0.13848400 |

TS-1-2-6SR

l imaginary frequency

H = -5393.901943

G = -5394.110116

E(M06-2X-DCM) = -5394.841796

|   |             |             |             |
|---|-------------|-------------|-------------|
| O | -1.85050200 | -0.29005600 | 1.84800600  |
| O | -3.07521900 | -1.53499600 | -0.09546000 |
| P | -1.78890900 | -0.61239800 | 0.25676600  |
| O | -1.89087200 | 0.76323100  | -0.41803700 |
| N | -0.43327400 | -1.41549900 | -0.02227700 |
| S | -0.07973900 | -2.47163100 | -1.16354800 |
| C | -0.07404500 | -4.11066400 | -0.26056700 |
| F | 0.06214200  | -5.09691000 | -1.14681400 |
| F | 0.93956000  | -4.17131100 | 0.61186100  |
| F | -1.22692700 | -4.26837200 | 0.40117600  |
| C | 0.50936700  | 3.70489600  | -0.83947900 |
| C | 0.78698800  | 3.20374900  | -2.29956100 |
| H | 0.32333900  | 3.92449600  | -2.98692000 |
| H | 1.86622200  | 3.26142800  | -2.45214400 |
| C | 0.32342400  | 1.84538100  | -2.77345500 |
| C | 0.92984400  | 2.57695400  | 0.19028000  |
| H | 0.03826400  | 2.21073000  | 0.69769900  |
| H | 1.60411100  | 2.99117000  | 0.93944900  |
| N | 1.56389000  | 1.37603600  | -0.36736500 |
| C | 2.92465700  | 1.23728900  | -0.53738200 |
| N | 3.27417000  | -0.05228500 | -0.85342400 |
| C | 4.52234500  | -0.66832900 | -1.06758900 |

|   |             |             |             |
|---|-------------|-------------|-------------|
| C | 5.74248800  | -0.00092900 | -1.25265100 |
| C | 4.50743200  | -2.07351700 | -1.10935700 |
| C | 6.91187100  | -0.74006100 | -1.44152900 |
| C | 5.68719000  | -2.78925400 | -1.28597300 |
| H | 3.56779800  | -2.60375700 | -1.00007000 |
| C | 6.90673100  | -2.13362400 | -1.45097400 |
| H | 7.82253100  | -2.69270700 | -1.59516100 |
| C | 5.62485100  | -4.29105200 | -1.21746700 |
| C | 8.22000500  | -0.00340900 | -1.57347900 |
| F | 5.44276100  | -4.71479900 | 0.06194000  |
| F | 6.75629900  | -4.87304300 | -1.66623900 |
| F | 4.59595100  | -4.78832700 | -1.93571400 |
| F | 8.07340900  | 1.18090100  | -2.20399400 |
| F | 9.13336600  | -0.72183800 | -2.26553500 |
| F | 8.76553000  | 0.26014500  | -0.36243600 |
| S | 3.96096000  | 2.55431000  | -0.41699700 |
| H | 5.77461000  | 1.07826600  | -1.24415000 |
| C | -1.01257200 | 1.44818800  | -2.80530900 |
| H | 2.50661900  | -0.72413000 | -0.90282500 |
| H | -1.73603600 | 2.26210000  | -2.71084800 |
| O | 1.32861200  | -2.25815800 | -1.56311100 |
| H | 1.04172100  | 0.51503500  | -0.21281900 |
| O | -1.08324100 | -2.63174400 | -2.21927500 |
| H | -1.29652900 | 1.02350700  | -1.52988300 |
| C | -6.91636900 | -0.38253200 | 1.17757700  |
| C | -6.04549000 | -1.04063100 | 2.03703000  |
| C | -4.78133900 | -1.46243000 | 1.59600000  |
| C | -5.24457200 | -0.52365600 | -0.60899500 |
| C | -6.51657600 | -0.15273200 | -0.13499000 |
| C | -1.61136700 | -1.35196500 | 2.74953000  |
| C | -2.59988500 | -2.31560300 | 2.94048700  |
| C | -2.28205600 | -3.49925100 | 3.62456600  |
| C | -1.04989500 | -3.64039900 | 4.25175800  |
| C | -0.14351200 | -2.58335300 | 4.19936900  |
| C | -0.38178100 | -1.42660300 | 3.43345700  |
| H | -7.19395300 | 0.33624600  | -0.82835500 |
| H | 0.79510300  | -2.65261300 | 4.73972400  |
| C | -4.10182100 | -2.28677900 | 2.68119400  |
| C | -4.82589900 | -1.72329000 | 3.95570200  |
| H | -4.78617800 | -2.41937000 | 4.79831300  |
| H | -4.32234500 | -0.79980500 | 4.26428300  |
| H | -3.11548200 | -5.47635800 | 3.25288300  |
| H | -3.91489700 | -4.59385000 | 4.54815400  |
| C | -4.37338800 | -1.15595400 | 0.29784700  |

|   |             |             |             |
|---|-------------|-------------|-------------|
| H | -7.89639700 | -0.05776200 | 1.51727300  |
| H | -0.80184300 | -4.54581800 | 4.79962400  |
| C | -6.25662200 | -1.39889000 | 3.48924200  |
| H | -6.91879100 | -2.27063100 | 3.58771000  |
| H | -6.71763100 | -0.58664400 | 4.06239200  |
| C | -3.43724700 | -4.47659900 | 3.56587200  |
| C | -4.39162100 | -3.81591700 | 2.54447200  |
| H | -5.44533300 | -4.05905700 | 2.71321600  |
| H | -4.12931800 | -4.13520200 | 1.52946000  |
| C | 0.63923700  | -0.33393000 | 3.46425700  |
| C | 0.31034700  | 0.91762400  | 4.04993700  |
| C | 1.97569200  | -0.60404300 | 3.07103100  |
| C | -0.98935400 | 1.22564100  | 4.56768000  |
| C | 1.33584500  | 1.92665800  | 4.19791900  |
| C | 2.99520200  | 0.40314700  | 3.26238500  |
| C | -1.26176600 | 2.43376400  | 5.15575200  |
| H | -1.76953300 | 0.47581800  | 4.51004300  |
| C | 1.00587900  | 3.18232600  | 4.79936800  |
| C | 2.64465700  | 1.64471200  | 3.79690000  |
| C | -0.25549600 | 3.43427800  | 5.26735600  |
| H | -2.25644300 | 2.62992200  | 5.54716700  |
| H | 1.79276000  | 3.92700600  | 4.89400900  |
| H | 3.41527000  | 2.40112700  | 3.92794600  |
| H | -0.49042100 | 4.38745200  | 5.73301000  |
| C | -4.97587300 | -0.25699300 | -2.05813600 |
| C | -5.00877000 | -1.32501100 | -2.98789700 |
| C | -4.88819500 | 1.08254600  | -2.51126500 |
| C | -5.09863400 | -2.69809700 | -2.59282700 |
| C | -4.98462500 | -1.03500400 | -4.40479200 |
| C | -4.87984900 | 1.35789300  | -3.93033100 |
| C | -5.13675700 | -3.70507800 | -3.52067200 |
| H | -5.13229700 | -2.93962800 | -1.53677000 |
| C | -5.02708500 | -2.11660100 | -5.33948500 |
| C | -4.93877300 | 0.29419400  | -4.83536700 |
| C | -5.09751800 | -3.41496900 | -4.91411000 |
| H | -5.19541700 | -4.73911600 | -3.19243200 |
| H | -5.00203200 | -1.88026000 | -6.40059500 |
| H | -4.93990200 | 0.50528300  | -5.90293100 |
| H | -5.12575400 | -4.22829100 | -5.63384700 |
| C | 3.69891600  | -2.10991500 | 2.20680500  |
| H | 3.98324300  | -3.06627300 | 1.77700400  |
| C | 2.38389700  | -1.85323300 | 2.49831100  |
| H | 1.63351000  | -2.60396500 | 2.29051500  |
| C | 4.70177100  | -1.12382800 | 2.43150900  |

|   |              |              |              |
|---|--------------|--------------|--------------|
| H | 5. 73664400  | -1. 34342500 | 2. 18608900  |
| C | 4. 35251200  | 0. 10283800  | 2. 92507300  |
| H | 5. 10122800  | 0. 87633100  | 3. 07348000  |
| C | -4. 70255000 | 3. 48363700  | -2. 08462900 |
| H | -4. 60636700 | 4. 30756900  | -1. 38280200 |
| C | -4. 71725600 | 3. 74988400  | -3. 48446600 |
| H | -4. 65589700 | 4. 77572400  | -3. 83763500 |
| C | -4. 80211100 | 2. 71474300  | -4. 37685800 |
| H | -4. 80665800 | 2. 90432000  | -5. 44778200 |
| C | -4. 78997800 | 2. 19757900  | -1. 61640200 |
| H | -4. 76183300 | 2. 00949400  | -0. 54946200 |
| C | 1. 29895400  | 5. 01416800  | -0. 60831800 |
| C | 1. 52452000  | 5. 48405000  | 0. 69679600  |
| C | 1. 73183100  | 5. 83372300  | -1. 66141300 |
| C | 2. 17479000  | 6. 69264800  | 0. 93794800  |
| H | 1. 18871700  | 4. 90560100  | 1. 55101100  |
| C | 2. 38183500  | 7. 04764600  | -1. 42635500 |
| H | 1. 58270000  | 5. 53602600  | -2. 69333000 |
| C | 2. 61196500  | 7. 48402200  | -0. 12425500 |
| H | 2. 33803200  | 7. 01513700  | 1. 96316300  |
| H | 2. 71213500  | 7. 64676900  | -2. 27111600 |
| H | 3. 12249600  | 8. 42519800  | 0. 06115700  |
| C | -1. 02935900 | 4. 05587500  | -0. 71710100 |
| H | -1. 26711600 | 4. 67558600  | -1. 58949200 |
| H | -1. 59760300 | 3. 12794400  | -0. 81609600 |
| C | -1. 55018300 | 4. 77626400  | 0. 51602200  |
| C | -1. 87486500 | 6. 07711700  | 0. 42478300  |
| H | -1. 69857400 | 6. 56887000  | -0. 53300100 |
| C | -1. 47375500 | 0. 30268700  | -3. 69795800 |
| H | -0. 82200200 | -0. 57032900 | -3. 64779400 |
| H | -2. 46909700 | -0. 03015800 | -3. 40726400 |
| H | -1. 52427500 | 0. 63274700  | -4. 74412600 |
| C | -2. 42084000 | 6. 98454600  | 1. 49044800  |
| H | -2. 66622600 | 6. 46364600  | 2. 41974100  |
| H | -1. 69117500 | 7. 76940900  | 1. 73481100  |
| H | -3. 32660100 | 7. 49938500  | 1. 14251600  |
| C | 1. 36129800  | 0. 98317800  | -3. 43274800 |
| H | 2. 37838900  | 1. 30732800  | -3. 21345800 |
| H | 1. 25515500  | -0. 07436000 | -3. 17215100 |
| H | 1. 20718900  | 1. 04289300  | -4. 52140200 |
| C | -1. 73764800 | 3. 94941400  | 1. 76674300  |
| H | -2. 16930700 | 2. 96999400  | 1. 52874000  |
| H | -0. 78842800 | 3. 75484200  | 2. 28194700  |
| H | -2. 39282800 | 4. 43546900  | 2. 49403500  |

TS-1-2-6SR-1

1 imaginary frequency

H = -5393.901673

G = -5394.110387

E(M06-2X-DCM) = -5394.840905

|   |             |             |             |
|---|-------------|-------------|-------------|
| O | -1.79357300 | -0.19465400 | 1.85808200  |
| O | -3.05967000 | -1.52827400 | 0.00208300  |
| P | -1.76049600 | -0.60113000 | 0.28616400  |
| O | -1.86302400 | 0.73998500  | -0.45617900 |
| N | -0.41921900 | -1.43576400 | 0.03663700  |
| S | -0.07961300 | -2.46631000 | -1.13426500 |
| C | 0.05070400  | -4.10204900 | -0.23555900 |
| F | 0.15559100  | -5.08294100 | -1.13190800 |
| F | 1.13095700  | -4.12365700 | 0.55657400  |
| F | -1.04028900 | -4.30031300 | 0.51153100  |
| C | 0.44856900  | 3.73968400  | -0.92767000 |
| C | 0.79310200  | 3.20029500  | -2.35638900 |
| H | 0.35024800  | 3.89350600  | -3.08523500 |
| H | 1.87675800  | 3.26636800  | -2.46973900 |
| C | 0.35919400  | 1.82335700  | -2.80742100 |
| C | 0.89607300  | 2.67340600  | 0.15881700  |
| H | 0.02331100  | 2.35318300  | 0.72905400  |
| H | 1.60410800  | 3.12743500  | 0.84979500  |
| N | 1.51411500  | 1.44264900  | -0.34966500 |
| C | 2.87479900  | 1.28616600  | -0.51045600 |
| N | 3.21584700  | -0.01318600 | -0.79166000 |
| C | 4.45872400  | -0.64065800 | -1.00934200 |
| C | 5.67993600  | 0.01620000  | -1.22052700 |
| C | 4.43535700  | -2.04647900 | -1.02816700 |
| C | 6.84264900  | -0.73235000 | -1.41470400 |
| C | 5.60804900  | -2.77149900 | -1.21237400 |
| H | 3.49540800  | -2.56977000 | -0.89506700 |
| C | 6.82910100  | -2.12546300 | -1.40466000 |
| H | 7.73924100  | -2.69205400 | -1.55562700 |
| C | 5.54354800  | -4.27193000 | -1.11938400 |
| C | 8.15236100  | -0.00464400 | -1.57650000 |
| F | 5.44465200  | -4.67918800 | 0.17494000  |
| F | 6.64198500  | -4.86470300 | -1.63208300 |
| F | 4.46891000  | -4.77444400 | -1.76248100 |
| F | 8.00350500  | 1.16724500  | -2.22962100 |
| F | 9.05480500  | -0.74098000 | -2.26399800 |
| F | 8.71283300  | 0.28167000  | -0.37752100 |
| S | 3.92488600  | 2.59635400  | -0.41963300 |

|   |             |             |             |
|---|-------------|-------------|-------------|
| H | 5.71872300  | 1.09510000  | -1.22907500 |
| C | -0.96642900 | 1.39347600  | -2.84228800 |
| H | 2.44249800  | -0.67780500 | -0.84609800 |
| H | -1.71133200 | 2.18894800  | -2.76135800 |
| O | 1.29470800  | -2.19241700 | -1.61081400 |
| H | 0.98299700  | 0.59161500  | -0.17654400 |
| O | -1.13206000 | -2.66698200 | -2.13372400 |
| H | -1.25849700 | 0.97967100  | -1.55953400 |
| C | -6.87384400 | -0.18324200 | 1.15648000  |
| C | -6.01877500 | -0.78102500 | 2.07414800  |
| C | -4.76821300 | -1.27606300 | 1.67303000  |
| C | -5.20837500 | -0.52919100 | -0.60901900 |
| C | -6.47175500 | -0.08849900 | -0.17222000 |
| C | -1.58847800 | -1.21171300 | 2.81735100  |
| C | -2.61834500 | -2.11368200 | 3.07943000  |
| C | -2.34862400 | -3.26020900 | 3.84301800  |
| C | -1.11594900 | -3.41865900 | 4.46512800  |
| C | -0.16029500 | -2.41393400 | 4.33012600  |
| C | -0.35493400 | -1.29938100 | 3.49271200  |
| H | -7.13985800 | 0.34758600  | -0.90841200 |
| H | 0.78129600  | -2.49202000 | 4.86405400  |
| C | -4.11906000 | -2.03359400 | 2.82332800  |
| C | -4.81460200 | -1.33606600 | 4.04536800  |
| H | -4.79771700 | -1.95847600 | 4.94459200  |
| H | -4.27534600 | -0.40917000 | 4.27275500  |
| H | -3.28440200 | -5.21669800 | 3.63696100  |
| H | -4.02199400 | -4.19333200 | 4.86335000  |
| C | -4.35181100 | -1.09377500 | 0.35475500  |
| H | -7.84506000 | 0.19606200  | 1.46347700  |
| H | -0.90495900 | -4.29525900 | 5.07219400  |
| C | -6.23494600 | -0.99995500 | 3.55348200  |
| H | -6.92959800 | -1.83280000 | 3.73184300  |
| H | -6.66129900 | -0.12225200 | 4.05219700  |
| C | -3.55101600 | -4.17976200 | 3.87089500  |
| C | -4.48296200 | -3.55361900 | 2.80898000  |
| H | -5.54528400 | -3.73096400 | 3.00335500  |
| H | -4.24873900 | -3.96290500 | 1.81964100  |
| C | 0.71433000  | -0.25450000 | 3.44651600  |
| C | 0.44803000  | 1.04415600  | 3.95562300  |
| C | 2.03362500  | -0.60853400 | 3.06251600  |
| C | -0.82923000 | 1.43927800  | 4.46964500  |
| C | 1.51799700  | 2.01442300  | 4.02882000  |
| C | 3.09930700  | 0.36060500  | 3.18554200  |
| C | -1.03956800 | 2.69125400  | 4.98701600  |



|   |             |             |             |
|---|-------------|-------------|-------------|
| H | -1.64051300 | 0.72088500  | 4.47242500  |
| C | 1.25026300  | 3.31969300  | 4.54939900  |
| C | 2.80924600  | 1.64889500  | 3.63935100  |
| C | 0.00877300  | 3.65409400  | 5.01850700  |
| H | -2.01665600 | 2.95155700  | 5.38515500  |
| H | 2.06914700  | 4.03427300  | 4.58504400  |
| H | 3.61312500  | 2.37761900  | 3.71353800  |
| H | -0.17753700 | 4.64287700  | 5.42867800  |
| C | -4.92911100 | -0.40733000 | -2.07482000 |
| C | -4.91731900 | -1.56505400 | -2.89151100 |
| C | -4.87026800 | 0.88147900  | -2.66233200 |
| C | -4.98383300 | -2.89346400 | -2.36209300 |
| C | -4.87343300 | -1.41970600 | -4.33001100 |
| C | -4.85237900 | 1.01096700  | -4.10194700 |
| C | -4.97758500 | -3.98945300 | -3.18362700 |
| H | -5.03705000 | -3.02952400 | -1.28838500 |
| C | -4.86758100 | -2.59062900 | -5.15113700 |
| C | -4.86128800 | -0.14076200 | -4.89380400 |
| C | -4.91394500 | -3.84090600 | -4.59813400 |
| H | -5.01972700 | -4.98615900 | -2.75322400 |
| H | -4.82638500 | -2.46137400 | -6.23001900 |
| H | -4.85123200 | -0.03984400 | -5.97727900 |
| H | -4.90573300 | -4.72315500 | -5.23206400 |
| C | 3.67804900  | -2.23932900 | 2.27573500  |
| H | 3.91393100  | -3.22874200 | 1.89459200  |
| C | 2.37914600  | -1.90636100 | 2.56220200  |
| H | 1.59339000  | -2.63236500 | 2.40296600  |
| C | 4.72751000  | -1.29058500 | 2.43980500  |
| H | 5.74893900  | -1.57301900 | 2.20239200  |
| C | 4.43911300  | -0.02234400 | 2.86246600  |
| H | 5.22364200  | 0.72298100  | 2.96243500  |
| C | -4.76756300 | 3.31861600  | -2.48469800 |
| H | -4.71599100 | 4.21264900  | -1.86921400 |
| C | -4.77912700 | 3.44041800  | -3.90415100 |
| H | -4.75174700 | 4.42617400  | -4.36063600 |
| C | -4.81610300 | 2.31652200  | -4.68529700 |
| H | -4.81425900 | 2.39451200  | -5.77006300 |
| C | -4.81304100 | 2.08519900  | -1.88655300 |
| H | -4.78515200 | 2.01063400  | -0.80577800 |
| C | 1.19332300  | 5.07586800  | -0.70606400 |
| C | 1.37669700  | 5.57053300  | 0.59805600  |
| C | 1.64226100  | 5.88129200  | -1.76335200 |
| C | 1.99026900  | 6.79980000  | 0.83158100  |
| H | 1.01654600  | 5.00470500  | 1.45050600  |

|   |             |             |             |
|---|-------------|-------------|-------------|
| C | 2.25882600  | 7.11376900  | -1.53356800 |
| H | 1.52852200  | 5.55901700  | -2.79243100 |
| C | 2.43920700  | 7.58076200  | -0.23387000 |
| H | 2.11606200  | 7.14714700  | 1.85392600  |
| H | 2.60116100  | 7.70398400  | -2.37975500 |
| H | 2.92178900  | 8.53737800  | -0.05292400 |
| C | -1.11160200 | 4.00265600  | -0.85042000 |
| H | -1.40179000 | 4.44584400  | -1.81290900 |
| H | -1.60898100 | 3.03530700  | -0.78298300 |
| C | -1.68105200 | 4.89388800  | 0.24565800  |
| C | -2.14252800 | 4.34748000  | 1.38365300  |
| H | -2.05414900 | 3.26632000  | 1.49819500  |
| C | -1.39366800 | 0.22403600  | -3.72107600 |
| H | -0.71633400 | -0.62864500 | -3.66010500 |
| H | -2.37954100 | -0.13420300 | -3.42797400 |
| H | -1.45174500 | 0.53964700  | -4.77138100 |
| C | -2.80077400 | 5.03772000  | 2.54508900  |
| H | -2.88286300 | 6.11997200  | 2.41709000  |
| H | -3.81425100 | 4.64354000  | 2.70542100  |
| H | -2.24356600 | 4.84829700  | 3.47110000  |
| C | 1.42271200  | 0.97448000  | -3.44292400 |
| H | 2.43019600  | 1.32188600  | -3.21408600 |
| H | 1.33303000  | -0.08147300 | -3.17036200 |
| H | 1.28291900  | 1.01920200  | -4.53420200 |
| C | -1.81878900 | 6.35825500  | -0.10841600 |
| H | -0.88490000 | 6.76658200  | -0.50530500 |
| H | -2.57751000 | 6.48218800  | -0.89583600 |
| H | -2.12089200 | 6.97834800  | 0.73866800  |

TS-1-2-6SR-2

1 imaginary frequency

H = -5393.903344

G = -5394.112083

E(M06-2X-DCM) = -5394.841060

|   |             |             |             |
|---|-------------|-------------|-------------|
| O | -1.83966200 | -0.35925900 | 1.93459800  |
| O | -3.06688300 | -1.58244900 | -0.01735300 |
| P | -1.81792100 | -0.60819200 | 0.33053100  |
| O | -2.00744300 | 0.78653300  | -0.27554600 |
| N | -0.43745300 | -1.34189000 | -0.02850900 |
| S | -0.11035000 | -2.34770400 | -1.22340300 |
| C | -0.10834900 | -4.02927900 | -0.40161700 |
| F | 0.00587200  | -4.97404200 | -1.33491900 |
| F | 0.91876400  | -4.13732100 | 0.45069800  |
| F | -1.25126500 | -4.20991500 | 0.27131400  |

|   |             |             |             |
|---|-------------|-------------|-------------|
| C | 0.54713400  | 3.72018700  | -0.39147900 |
| C | 0.74777000  | 3.39620800  | -1.90854600 |
| H | 0.27832100  | 4.19417200  | -2.49567100 |
| H | 1.82196200  | 3.45204200  | -2.09263800 |
| C | 0.25470500  | 2.10117400  | -2.50963800 |
| C | 1.01243600  | 2.47130500  | 0.47270500  |
| H | 0.13960800  | 2.05922400  | 0.98278500  |
| H | 1.72099300  | 2.80573600  | 1.23023400  |
| N | 1.60463300  | 1.33661500  | -0.23892200 |
| C | 2.95771000  | 1.20221300  | -0.46798100 |
| N | 3.28201400  | -0.06168200 | -0.89081900 |
| C | 4.52068600  | -0.67616600 | -1.15568300 |
| C | 5.72747100  | -0.00446800 | -1.40132700 |
| C | 4.50733400  | -2.08095900 | -1.19327600 |
| C | 6.88919600  | -0.74005500 | -1.64301100 |
| C | 5.67962400  | -2.79377500 | -1.42466100 |
| H | 3.57509100  | -2.61251800 | -1.03661700 |
| C | 6.88739800  | -2.13398300 | -1.64848800 |
| H | 7.79723500  | -2.69046000 | -1.83451400 |
| C | 5.62429400  | -4.29564000 | -1.35275400 |
| C | 8.18704100  | -0.00050200 | -1.84242800 |
| F | 5.48646800  | -4.71929500 | -0.06775900 |
| F | 6.74121900  | -4.87493500 | -1.83941900 |
| F | 4.57271600  | -4.79610100 | -2.03537800 |
| F | 8.00482800  | 1.18314200  | -2.46543700 |
| F | 9.06484800  | -0.71713600 | -2.58089700 |
| F | 8.79424400  | 0.26525200  | -0.66194900 |
| S | 4.01353600  | 2.49638100  | -0.28486500 |
| H | 5.75564400  | 1.07492400  | -1.39744100 |
| C | -1.08724800 | 1.72044200  | -2.54625900 |
| H | 2.50678600  | -0.72399100 | -0.95813100 |
| H | -1.79702900 | 2.52983300  | -2.35539500 |
| O | 1.29660800  | -2.13362100 | -1.62797700 |
| H | 1.07831000  | 0.46816400  | -0.14594900 |
| O | -1.12485200 | -2.44223800 | -2.27667600 |
| H | -1.37279200 | 1.16833900  | -1.33666200 |
| C | -6.93399100 | -0.58695600 | 1.30424400  |
| C | -6.02748500 | -1.21045400 | 2.15256100  |
| C | -4.75618400 | -1.58859100 | 1.69286700  |
| C | -5.28216300 | -0.66622200 | -0.50546400 |
| C | -6.56223800 | -0.34701500 | -0.01468900 |
| C | -1.56300800 | -1.44041700 | 2.79800400  |
| C | -2.53690800 | -2.41762700 | 2.99646400  |
| C | -2.19259800 | -3.60552400 | 3.66020800  |

|   |             |             |             |
|---|-------------|-------------|-------------|
| C | -0.94690000 | -3.74060800 | 4.26128100  |
| C | -0.05100700 | -2.67593100 | 4.19852100  |
| C | -0.31581100 | -1.51301000 | 3.44992600  |
| H | -7.26879400 | 0.11154300  | -0.69947200 |
| H | 0.89995700  | -2.74324200 | 4.71677400  |
| C | -4.04325300 | -2.40518800 | 2.76250800  |
| C | -4.75836600 | -1.86363200 | 4.05072900  |
| H | -4.68800200 | -2.56111400 | 4.89020000  |
| H | -4.27226700 | -0.92918200 | 4.35426800  |
| H | -3.01111200 | -5.58957400 | 3.29092600  |
| H | -3.79681600 | -4.72314300 | 4.60524700  |
| C | -4.37532600 | -1.26201000 | 0.39151100  |
| H | -7.92092900 | -0.29872800 | 1.65675000  |
| H | -0.67961300 | -4.64849900 | 4.79586100  |
| C | -6.20455000 | -1.57405100 | 3.60822100  |
| H | -6.84391300 | -2.46120000 | 3.71865900  |
| H | -6.67506100 | -0.77270600 | 4.18902700  |
| C | -3.33755300 | -4.59501700 | 3.61552700  |
| C | -4.31559700 | -3.93724400 | 2.61596900  |
| H | -5.36343500 | -4.19559000 | 2.79767400  |
| H | -4.06467200 | -4.24320300 | 1.59393800  |
| C | 0.70589800  | -0.42121700 | 3.46217400  |
| C | 0.38512300  | 0.84603700  | 4.01873500  |
| C | 2.04043700  | -0.70601300 | 3.06836100  |
| C | -0.92186700 | 1.19033900  | 4.49389200  |
| C | 1.42228500  | 1.84377200  | 4.16278300  |
| C | 3.07186400  | 0.28779900  | 3.26424900  |
| C | -1.19498500 | 2.42755600  | 5.01704400  |
| H | -1.71161300 | 0.45057300  | 4.44614800  |
| C | 1.09582200  | 3.12488100  | 4.71022800  |
| C | 2.73394300  | 1.53568700  | 3.79230600  |
| C | -0.17749900 | 3.41769300  | 5.11894300  |
| H | -2.19872200 | 2.65462000  | 5.36618200  |
| H | 1.89278400  | 3.85892700  | 4.80387000  |
| H | 3.51272100  | 2.28370800  | 3.92251000  |
| H | -0.41212800 | 4.39285800  | 5.53685700  |
| C | -5.04013600 | -0.39121000 | -1.95698600 |
| C | -4.96277300 | -1.46378100 | -2.87930600 |
| C | -5.08579800 | 0.94766100  | -2.42137200 |
| C | -4.91982300 | -2.83691900 | -2.47691400 |
| C | -4.96311700 | -1.18233400 | -4.29819500 |
| C | -5.11656300 | 1.21128600  | -3.84241300 |
| C | -4.85080600 | -3.84802800 | -3.39832200 |
| H | -4.93864700 | -3.07615600 | -1.42028600 |

|   |             |             |             |
|---|-------------|-------------|-------------|
| C | -4.88932500 | -2.26791800 | -5.22631300 |
| C | -5.06104600 | 0.14044600  | -4.73910400 |
| C | -4.83013200 | -3.56408800 | -4.79326900 |
| H | -4.80927800 | -4.88076300 | -3.06342700 |
| H | -4.88273700 | -2.03605900 | -6.28867700 |
| H | -5.08631300 | 0.34178000  | -5.80823000 |
| H | -4.77087000 | -4.38036400 | -5.50776000 |
| C | 3.74320700  | -2.21799900 | 2.17260800  |
| H | 4.01421400  | -3.16876200 | 1.72210100  |
| C | 2.43284300  | -1.95234900 | 2.47774700  |
| H | 1.67327300  | -2.69092700 | 2.25871300  |
| C | 4.75859800  | -1.24799100 | 2.40940900  |
| H | 5.78976400  | -1.47573900 | 2.15588600  |
| C | 4.42531800  | -0.02516300 | 2.92319500  |
| H | 5.18270800  | 0.73856900  | 3.07752500  |
| C | -5.14003800 | 3.35890800  | -2.01623100 |
| H | -5.12640900 | 4.19450800  | -1.32177600 |
| C | -5.20479700 | 3.61055700  | -3.41721400 |
| H | -5.25853900 | 4.63392600  | -3.77857900 |
| C | -5.18852600 | 2.56439500  | -4.30027600 |
| H | -5.22375900 | 2.74268900  | -5.37254000 |
| C | -5.08523200 | 2.07519600  | -1.53664700 |
| H | -5.01827000 | 1.90144400  | -0.46900600 |
| C | 1.37070900  | 4.97330400  | -0.01571000 |
| C | 1.49091400  | 5.32832400  | 1.33930000  |
| C | 1.95025700  | 5.83418200  | -0.95671100 |
| C | 2.17502000  | 6.47546100  | 1.73478800  |
| H | 1.04295900  | 4.70394700  | 2.10760000  |
| C | 2.63590900  | 6.98718800  | -0.56539000 |
| H | 1.89190200  | 5.61615300  | -2.01735600 |
| C | 2.75537400  | 7.31462500  | 0.78251400  |
| H | 2.25282500  | 6.71409600  | 2.79268000  |
| H | 3.08101000  | 7.62514700  | -1.32466800 |
| H | 3.29181200  | 8.20886100  | 1.08806900  |
| C | -0.94719900 | 4.02024800  | 0.01935600  |
| H | -1.58028100 | 3.20146200  | -0.33691900 |
| H | -0.98050800 | 3.94644300  | 1.11184800  |
| C | -1.57124700 | 5.35524500  | -0.36011300 |
| C | -1.93204000 | 6.20258500  | 0.61814200  |
| H | -1.72028400 | 5.89787000  | 1.64350700  |
| C | -1.57783600 | 0.67725100  | -3.54380200 |
| H | -0.98239400 | -0.23757000 | -3.53269200 |
| H | -2.60244500 | 0.39130600  | -3.31392600 |
| H | -1.56388100 | 1.08235100  | -4.56458100 |

|   |             |            |             |
|---|-------------|------------|-------------|
| C | -2.57860400 | 7.55421000 | 0.50440300  |
| H | -2.84640400 | 7.82697400 | -0.51980100 |
| H | -3.48994800 | 7.60429700 | 1.11575600  |
| H | -1.90485900 | 8.33415400 | 0.88551900  |
| C | 1.25773400  | 1.30156200 | -3.28983000 |
| H | 2.28614100  | 1.59340800 | -3.07829900 |
| H | 1.14747000  | 0.22450500 | -3.12932900 |
| H | 1.06283500  | 1.46760700 | -4.36089900 |
| C | -1.80226600 | 5.64891800 | -1.82570000 |
| H | -0.87811000 | 5.97135400 | -2.32415700 |
| H | -2.17208700 | 4.76504000 | -2.36017000 |
| H | -2.53448400 | 6.44603700 | -1.97793500 |

TS-1-2-6SR-3

l imaginary frequency

H = -5393.904996

G = -5394.114695

E(M06-2X-DCM) = -5394.841573

|   |             |             |             |
|---|-------------|-------------|-------------|
| O | -1.82293800 | -0.34776000 | 1.98731700  |
| O | -3.11219200 | -1.47107600 | 0.01301600  |
| P | -1.83865000 | -0.53560900 | 0.37507100  |
| O | -2.00866700 | 0.88844800  | -0.16808200 |
| N | -0.48354600 | -1.28489700 | -0.04402900 |
| S | -0.21372400 | -2.24643800 | -1.29053600 |
| C | -0.25582000 | -3.96316400 | -0.54532300 |
| F | -0.20217100 | -4.86740100 | -1.52313300 |
| F | 0.78826700  | -4.14870000 | 0.27254800  |
| F | -1.38675600 | -4.13189600 | 0.15022600  |
| C | 0.67975600  | 3.76269600  | -0.16093200 |
| C | 0.79494700  | 3.54342700  | -1.70427900 |
| H | 0.27673100  | 4.38505400  | -2.18499600 |
| H | 1.85393000  | 3.62154100  | -1.95455700 |
| C | 0.27466500  | 2.28428800  | -2.35806100 |
| C | 1.06634000  | 2.43653400  | 0.61377200  |
| H | 0.16513400  | 2.03419300  | 1.08112500  |
| H | 1.77696800  | 2.67374200  | 1.40479000  |
| N | 1.61396400  | 1.32777400  | -0.17184600 |
| C | 2.96000400  | 1.16310300  | -0.42107900 |
| N | 3.23987400  | -0.08472400 | -0.91722700 |
| C | 4.45665900  | -0.72042200 | -1.22912700 |
| C | 5.67787300  | -0.07107600 | -1.46342400 |
| C | 4.40358200  | -2.12102000 | -1.33124400 |
| C | 6.81499800  | -0.82584500 | -1.75724300 |
| C | 5.55194900  | -2.85391200 | -1.61439300 |

|   |             |             |             |
|---|-------------|-------------|-------------|
| H | 3.45938400  | -2.63366900 | -1.18377200 |
| C | 6.77423000  | -2.21749300 | -1.82686600 |
| H | 7.66533900  | -2.78920800 | -2.05301200 |
| C | 5.45556600  | -4.35540000 | -1.61179500 |
| C | 8.12982900  | -0.11343600 | -1.94337400 |
| F | 5.32272700  | -4.83538100 | -0.34610000 |
| F | 6.54938400  | -4.94157600 | -2.14091000 |
| F | 4.38158200  | -4.79433300 | -2.30184000 |
| F | 7.97163800  | 1.10224800  | -2.50864700 |
| F | 8.97643000  | -0.81879000 | -2.72777500 |
| F | 8.76164500  | 0.08103300  | -0.76187500 |
| S | 4.05927500  | 2.40933900  | -0.17557900 |
| H | 5.73615600  | 1.00578400  | -1.41036400 |
| C | -1.07085400 | 1.91587200  | -2.38525400 |
| H | 2.44447300  | -0.71978100 | -1.00825200 |
| H | -1.76846700 | 2.71928500  | -2.13632200 |
| O | 1.19195800  | -2.06190500 | -1.71242400 |
| H | 1.06165700  | 0.47190400  | -0.11980800 |
| O | -1.24993600 | -2.25741800 | -2.32638000 |
| H | -1.36459400 | 1.30729000  | -1.20030800 |
| C | -6.94558700 | -0.40305300 | 1.37081300  |
| C | -6.04646900 | -1.05100000 | 2.20885700  |
| C | -4.79056700 | -1.46030300 | 1.73410900  |
| C | -5.31507000 | -0.51903600 | -0.45684500 |
| C | -6.58323700 | -0.17329700 | 0.04722700  |
| C | -1.57863800 | -1.46784200 | 2.80955300  |
| C | -2.59272300 | -2.40561800 | 2.99790600  |
| C | -2.29244700 | -3.62462300 | 3.62591900  |
| C | -1.04304800 | -3.83466500 | 4.19687200  |
| C | -0.09929400 | -2.81191200 | 4.14390600  |
| C | -0.32513300 | -1.61591500 | 3.43595900  |
| H | -7.28808500 | 0.29788900  | -0.63062200 |
| H | 0.85763100  | -2.93769300 | 4.63988500  |
| C | -4.09966700 | -2.31947800 | 2.78452600  |
| C | -4.77894500 | -1.76860500 | 4.08722300  |
| H | -4.72625000 | -2.47941100 | 4.91683600  |
| H | -4.25447800 | -0.85725700 | 4.39707800  |
| H | -3.21142100 | -5.56081300 | 3.23641400  |
| H | -3.93232400 | -4.68061800 | 4.57855400  |
| C | -4.41228300 | -1.13203000 | 0.43279400  |
| H | -7.92190500 | -0.09204300 | 1.73343900  |
| H | -0.80904500 | -4.76848100 | 4.70154300  |
| C | -6.21852000 | -1.41955100 | 3.66423800  |
| H | -6.89079900 | -2.28168700 | 3.77675600  |

|   |             |             |             |
|---|-------------|-------------|-------------|
| H | -6.65006500 | -0.60499700 | 4.25688600  |
| C | -3.48363400 | -4.55749900 | 3.58329900  |
| C | -4.44418600 | -3.83501700 | 2.61300000  |
| H | -5.50018100 | -4.04859800 | 2.80491000  |
| H | -4.22221500 | -4.13116600 | 1.58137000  |
| C | 0.74396900  | -0.57069200 | 3.47031300  |
| C | 0.49180100  | 0.68091200  | 4.09310600  |
| C | 2.05603700  | -0.89586300 | 3.03582600  |
| C | -0.78983700 | 1.06072800  | 4.60847200  |
| C | 1.57709400  | 1.62107200  | 4.26689500  |
| C | 3.13553000  | 0.03996500  | 3.25629700  |
| C | -0.99538800 | 2.28017900  | 5.19991100  |
| H | -1.61472500 | 0.36242300  | 4.53612400  |
| C | 1.32087900  | 2.88466100  | 4.88763500  |
| C | 2.86584800  | 1.27328400  | 3.85335100  |
| C | 0.06987000  | 3.21437100  | 5.33529400  |
| H | -1.98163200 | 2.53558600  | 5.57811300  |
| H | 2.15353400  | 3.57429700  | 5.00590000  |
| H | 3.68085200  | 1.97746500  | 4.00446800  |
| H | -0.11110300 | 4.17576700  | 5.80812000  |
| C | -5.07764200 | -0.25989700 | -1.91146000 |
| C | -4.98523900 | -1.34304000 | -2.82077800 |
| C | -5.13522000 | 1.07285900  | -2.39299300 |
| C | -4.94196500 | -2.71185500 | -2.40402600 |
| C | -4.97221300 | -1.07797700 | -4.24266100 |
| C | -5.15987300 | 1.31852600  | -3.81743000 |
| C | -4.85650600 | -3.73243800 | -3.31351300 |
| H | -4.97587900 | -2.94134500 | -1.34575200 |
| C | -4.87922800 | -2.17266200 | -5.15819600 |
| C | -5.07979000 | 0.23813400  | -4.70032700 |
| C | -4.81778500 | -3.46375100 | -4.71091100 |
| H | -4.81622800 | -4.76134800 | -2.96679900 |
| H | -4.86100700 | -1.95171800 | -6.22273200 |
| H | -5.09679500 | 0.42636600  | -5.77199000 |
| H | -4.74431700 | -4.28725000 | -5.41571400 |
| C | 3.66871800  | -2.43779200 | 2.03208400  |
| H | 3.88703300  | -3.37677100 | 1.53116900  |
| C | 2.37861100  | -2.12932600 | 2.38000800  |
| H | 1.58151500  | -2.82219300 | 2.14547600  |
| C | 4.73192500  | -1.52630700 | 2.29081600  |
| H | 5.74597000  | -1.78737300 | 2.00273900  |
| C | 4.46589500  | -0.31624300 | 2.86996900  |
| H | 5.26059100  | 0.40427600  | 3.04331500  |
| C | -5.22879200 | 3.48826600  | -2.02024500 |



|   |             |            |             |
|---|-------------|------------|-------------|
| H | -5.23208800 | 4.33263800 | -1.33646700 |
| C | -5.29253000 | 3.72097600 | -3.42423900 |
| H | -5.36315400 | 4.73845200 | -3.79928600 |
| C | -5.25177900 | 2.66410400 | -4.29332800 |
| H | -5.28332400 | 2.82764500 | -5.36804700 |
| C | -5.15309100 | 2.21218500 | -1.52361400 |
| H | -5.08595800 | 2.05429500 | -0.45346800 |
| C | 1.59731500  | 4.93238000 | 0.26395600  |
| C | 1.84009500  | 5.15643700 | 1.63056600  |
| C | 2.13463800  | 5.85705000 | -0.64171800 |
| C | 2.60577500  | 6.23505600 | 2.06851900  |
| H | 1.41815900  | 4.48927000 | 2.37689500  |
| C | 2.89988700  | 6.94236700 | -0.20752200 |
| H | 1.96817600  | 5.74839600 | -1.70725700 |
| C | 3.14478500  | 7.13692600 | 1.14990100  |
| H | 2.77766400  | 6.37176000 | 3.13329800  |
| H | 3.30576800  | 7.63462800 | -0.94071800 |
| H | 3.74356600  | 7.97826600 | 1.48797800  |
| C | -0.79087000 | 4.14348500 | 0.27546700  |
| H | -1.46125200 | 3.33914300 | -0.03812800 |
| H | -0.80317800 | 4.12011200 | 1.37255400  |
| C | -1.34642500 | 5.48940800 | -0.18373900 |
| C | -2.01429600 | 5.58590400 | -1.34724900 |
| H | -2.14863200 | 4.67657600 | -1.93291600 |
| C | -1.59471100 | 0.93358700 | -3.42692800 |
| H | -1.02018100 | 0.00620400 | -3.46757800 |
| H | -2.62289200 | 0.65903300 | -3.19796800 |
| H | -1.58343800 | 1.38675000 | -4.42731200 |
| C | -2.63747100 | 6.80031400 | -1.97945800 |
| H | -2.51154900 | 7.71107700 | -1.38951400 |
| H | -2.20253800 | 6.98751400 | -2.97093000 |
| H | -3.71426300 | 6.64894400 | -2.13852900 |
| C | 1.25273400  | 1.52090900 | -3.20379600 |
| H | 2.28932200  | 1.77256600 | -2.98000600 |
| H | 1.11685400  | 0.43805300 | -3.12561800 |
| H | 1.05574900  | 1.77534300 | -4.25729100 |
| C | -1.16806600 | 6.65291200 | 0.76634900  |
| H | -1.50284200 | 6.37015200 | 1.77336300  |
| H | -0.11851700 | 6.94913000 | 0.85768700  |
| H | -1.74027900 | 7.53318300 | 0.46467000  |

TS-1-2-6RS

l imaginary frequency

H = -5393.910228

G = -5394.116355

E(M06-2X-DCM) = -5394.841606

|   |             |             |             |
|---|-------------|-------------|-------------|
| O | -1.51856200 | -1.30808400 | -1.75133000 |
| O | -3.22002000 | -0.43666400 | 0.02240000  |
| P | -1.63543600 | -0.64726300 | -0.27417000 |
| O | -1.04195000 | 0.77319900  | -0.25583600 |
| N | -1.07872800 | -1.72322600 | 0.76603000  |
| S | 0.48944900  | -1.96730900 | 0.95559700  |
| C | 0.65689700  | -3.78839500 | 0.57481200  |
| F | 0.21357100  | -4.04295800 | -0.65659300 |
| F | -0.04808000 | -4.51567400 | 1.45054900  |
| F | 1.94472500  | -4.12887900 | 0.66245000  |
| C | 0.40922300  | 4.59717400  | 0.22460000  |
| C | 0.10340800  | 4.25267400  | 1.72203400  |
| H | -0.85191600 | 4.73061100  | 1.96910400  |
| H | 0.88247900  | 4.73093100  | 2.32276300  |
| C | 0.02102500  | 2.82181800  | 2.20276700  |
| C | 1.77393800  | 3.97030900  | -0.20011200 |
| H | 1.91437500  | 4.12393900  | -1.27465700 |
| H | 2.57864700  | 4.50452800  | 0.30514800  |
| N | 1.97575500  | 2.55708900  | 0.10881000  |
| C | 3.20785800  | 2.08360500  | 0.52791600  |
| N | 3.27739200  | 0.71997000  | 0.53427300  |
| C | 4.38574200  | -0.12056300 | 0.80058600  |
| C | 5.33417400  | 0.12437500  | 1.80348100  |
| C | 4.48495200  | -1.28974900 | 0.03743300  |
| C | 6.38030000  | -0.77669300 | 1.99772900  |
| C | 5.53621100  | -2.18176700 | 0.24863800  |
| H | 3.73455900  | -1.50242200 | -0.71490000 |
| C | 6.49982200  | -1.93090500 | 1.22157400  |
| H | 7.32301900  | -2.61743900 | 1.37552100  |
| C | 5.62406300  | -3.39689400 | -0.63285300 |
| C | 7.36176500  | -0.54154000 | 3.11626900  |
| F | 5.88387500  | -3.05402300 | -1.92735700 |
| F | 6.59979100  | -4.24484700 | -0.25077500 |
| F | 4.46444500  | -4.08939800 | -0.65300500 |
| F | 8.59269100  | -1.00992300 | 2.80602000  |
| F | 7.48820200  | 0.76705100  | 3.41709400  |
| F | 6.98077200  | -1.17305300 | 4.25238900  |
| S | 4.45937900  | 3.10316800  | 1.01855700  |
| H | 5.26177500  | 1.01208500  | 2.41368100  |
| C | -1.13904700 | 2.06331400  | 2.05995900  |
| H | 2.46153700  | 0.19137500  | 0.21269600  |
| H | -2.00899300 | 2.63509100  | 1.72550700  |

|   |             |             |             |
|---|-------------|-------------|-------------|
| O | 1.31603700  | -1.30392600 | -0.08745300 |
| H | 1.40525000  | 1.90123400  | -0.41964900 |
| O | 0.91161600  | -1.80898900 | 2.35112600  |
| H | -0.96173000 | 1.43166900  | 0.88680300  |
| C | -5.75777500 | -3.77610900 | -0.14841400 |
| C | -5.36508800 | -3.12517600 | -1.31164300 |
| C | -4.57991600 | -1.96114500 | -1.25786500 |
| C | -4.56348800 | -2.10472000 | 1.18067500  |
| C | -5.38510300 | -3.24000700 | 1.08210100  |
| C | -1.93187800 | -0.64475800 | -2.91308500 |
| C | -3.29320400 | -0.55034300 | -3.18535900 |
| C | -3.72384400 | 0.27258000  | -4.23698800 |
| C | -2.79904100 | 0.85313300  | -5.09887800 |
| C | -1.44124300 | 0.59114000  | -4.91192200 |
| C | -0.96683400 | -0.14516400 | -3.81081100 |
| H | -5.72665800 | -3.70478300 | 2.00211800  |
| H | -0.71781100 | 0.97104400  | -5.62662900 |
| C | -4.47857100 | -1.34650800 | -2.65167500 |
| C | -4.67677200 | -2.62979000 | -3.53306600 |
| H | -3.71513800 | -3.14950300 | -3.61440700 |
| H | -5.01236100 | -2.39110900 | -4.54647600 |
| H | -5.64932400 | -0.18037600 | -5.13129100 |
| H | -5.59846100 | 1.38329400  | -4.32807100 |
| C | -4.11767000 | -1.51688600 | -0.01919100 |
| H | -6.36333100 | -4.67764600 | -0.19258600 |
| H | -3.12468400 | 1.47188900  | -5.93125200 |
| C | -5.67092300 | -3.50198000 | -2.74306600 |
| H | -5.53939500 | -4.57314900 | -2.93317800 |
| H | -6.71141200 | -3.26111500 | -3.00271700 |
| C | -5.23631700 | 0.35073400  | -4.26286500 |
| C | -5.63809600 | -0.33542300 | -2.93576700 |
| H | -5.66849500 | 0.40387400  | -2.12679800 |
| H | -6.61685100 | -0.82299400 | -2.97946300 |
| C | 0.49084700  | -0.44728700 | -3.67399100 |
| C | 1.44244800  | 0.60294300  | -3.61330600 |
| C | 0.92805100  | -1.79837400 | -3.69520800 |
| C | 1.08433000  | 1.99076400  | -3.64899000 |
| C | 2.85203800  | 0.28649100  | -3.53132700 |
| C | 2.33544900  | -2.09691300 | -3.56006200 |
| C | 2.03978500  | 2.97546100  | -3.67537500 |
| H | 0.03553200  | 2.26229800  | -3.67446900 |
| C | 3.81239800  | 1.34627500  | -3.51982700 |
| C | 3.25719500  | -1.04982600 | -3.47710700 |
| C | 3.42545100  | 2.65589200  | -3.60794100 |

|   |              |              |              |
|---|--------------|--------------|--------------|
| H | 1. 73581000  | 4. 01696300  | -3. 74786600 |
| H | 4. 86497800  | 1. 08368300  | -3. 45068600 |
| H | 4. 31525300  | -1. 28287700 | -3. 38163700 |
| H | 4. 16581500  | 3. 45040800  | -3. 61309200 |
| C | -4. 31466300 | -1. 54373200 | 2. 54719900  |
| C | -3. 50932200 | -2. 24584200 | 3. 47526600  |
| C | -5. 02286600 | -0. 38242200 | 2. 94933500  |
| C | -2. 76159600 | -3. 41495100 | 3. 12316900  |
| C | -3. 41690100 | -1. 77422500 | 4. 83928300  |
| C | -4. 90756600 | 0. 08604900  | 4. 31239800  |
| C | -2. 00114500 | -4. 07710300 | 4. 05061700  |
| H | -2. 77701600 | -3. 75599400 | 2. 09548300  |
| C | -2. 61631300 | -2. 49922600 | 5. 77654900  |
| C | -4. 11357000 | -0. 62356800 | 5. 21775600  |
| C | -1. 93183900 | -3. 62152300 | 5. 39782000  |
| H | -1. 42662000 | -4. 94840100 | 3. 75151000  |
| H | -2. 56262300 | -2. 13315500 | 6. 79914500  |
| H | -4. 04238200 | -0. 27522100 | 6. 24640200  |
| H | -1. 32246500 | -4. 16188400 | 6. 11693800  |
| C | 0. 49928900  | -4. 19775400 | -3. 89484100 |
| H | -0. 20001900 | -5. 01536700 | -4. 04857300 |
| C | 0. 04181000  | -2. 90629500 | -3. 88787000 |
| H | -1. 01254000 | -2. 71591000 | -4. 04967700 |
| C | 1. 87933700  | -4. 48463600 | -3. 70106900 |
| H | 2. 22002400  | -5. 51617200 | -3. 68937200 |
| C | 2. 77119800  | -3. 45956800 | -3. 54391500 |
| H | 3. 82879500  | -3. 65819300 | -3. 40033900 |
| C | -6. 56528900 | 1. 46247600  | 2. 49782700  |
| H | -7. 22194300 | 1. 98986400  | 1. 81082800  |
| C | -6. 43016200 | 1. 93048900  | 3. 83603300  |
| H | -6. 97401900 | 2. 81525700  | 4. 15544400  |
| C | -5. 62549200 | 1. 25617200  | 4. 71384600  |
| H | -5. 52106400 | 1. 59418300  | 5. 74230900  |
| C | -5. 88765200 | 0. 34882700  | 2. 07165300  |
| H | -6. 01508600 | 0. 00253400  | 1. 05221900  |
| C | 1. 14537600  | 2. 31455800  | 3. 05112300  |
| H | 1. 30726900  | 1. 23961300  | 2. 92897300  |
| H | 2. 08124000  | 2. 84972500  | 2. 88237500  |
| H | 0. 85274300  | 2. 46203400  | 4. 10396400  |
| C | -1. 45063200 | 0. 90961000  | 3. 00976500  |
| H | -0. 65037200 | 0. 16837900  | 3. 06889500  |
| H | -1. 63879700 | 1. 29211400  | 4. 02092300  |
| H | -2. 35088800 | 0. 39056500  | 2. 68145800  |
| C | 0. 63375500  | 6. 12602600  | 0. 07969600  |

|   |             |            |             |
|---|-------------|------------|-------------|
| C | 0.58031600  | 7.03015600 | 1.15144900  |
| C | 0.95497900  | 6.65459800 | -1.18412600 |
| C | 0.82719900  | 8.39349700 | 0.97073800  |
| H | 0.33206300  | 6.69233500 | 2.15098400  |
| C | 1.20767100  | 8.01287300 | -1.36892600 |
| H | 1.01064200  | 6.00061300 | -2.04884000 |
| C | 1.14366400  | 8.89432700 | -0.28959700 |
| H | 0.77118600  | 9.06145300 | 1.82620500  |
| H | 1.45532300  | 8.38023900 | -2.36135500 |
| H | 1.33868800  | 9.95379900 | -0.42986200 |
| C | -0.72764400 | 4.11431700 | -0.73927800 |
| H | -0.43685600 | 4.45057400 | -1.74439300 |
| H | -0.70871600 | 3.02243800 | -0.78414300 |
| C | -2.16960900 | 4.55586800 | -0.50201400 |
| C | -3.13163100 | 3.61510300 | -0.45607900 |
| H | -2.82167800 | 2.57503400 | -0.54520300 |
| C | -2.46421800 | 6.03841500 | -0.46801100 |
| H | -2.06494700 | 6.52366200 | 0.42962200  |
| H | -1.99386200 | 6.54759900 | -1.31816300 |
| H | -3.53595400 | 6.24508200 | -0.50685900 |
| C | -4.61883100 | 3.79379500 | -0.32349300 |
| H | -5.00014200 | 3.20494300 | 0.52121400  |
| H | -4.92876500 | 4.83124000 | -0.17507800 |
| H | -5.13251200 | 3.41647600 | -1.21958600 |

TS-1-2-6RS-1

l imaginary frequency

H = -5393.910365

G = -5394.118021

E(M06-2X-DCM) = -5394.840806

|   |             |             |             |
|---|-------------|-------------|-------------|
| O | -1.62742200 | -1.37758300 | -1.66981800 |
| O | -3.34502300 | -0.40751600 | 0.03187200  |
| P | -1.75721900 | -0.59808500 | -0.25178700 |
| O | -1.20358900 | 0.83292700  | -0.35121100 |
| N | -1.16405000 | -1.57161400 | 0.86737600  |
| S | 0.40705900  | -1.76696100 | 1.06877200  |
| C | 0.61792400  | -3.60578100 | 0.81743000  |
| F | 0.19928600  | -3.95218700 | -0.39989700 |
| F | -0.08361400 | -4.28688500 | 1.73110500  |
| F | 1.91185200  | -3.91001000 | 0.94545000  |
| C | 0.66034300  | 4.57397000  | 0.03232300  |
| C | 0.45481300  | 4.25766700  | 1.55476200  |
| H | -0.35942500 | 4.89679500  | 1.91448400  |
| H | 1.36999700  | 4.56380400  | 2.06838500  |

|   |             |             |             |
|---|-------------|-------------|-------------|
| C | 0.12200100  | 2.86329000  | 2.03431200  |
| C | 1.99693600  | 3.90872700  | -0.42885500 |
| H | 2.08985800  | 4.01528400  | -1.51488200 |
| H | 2.83084900  | 4.44710100  | 0.02155800  |
| N | 2.17522200  | 2.50661200  | -0.06373900 |
| C | 3.37341800  | 2.02742300  | 0.43659900  |
| N | 3.40878300  | 0.66294200  | 0.48765700  |
| C | 4.48115800  | -0.21095500 | 0.78097800  |
| C | 5.48988300  | 0.05266100  | 1.71866400  |
| C | 4.48566200  | -1.43641500 | 0.10093600  |
| C | 6.49912300  | -0.88696600 | 1.92784500  |
| C | 5.50475000  | -2.36172300 | 0.32210400  |
| H | 3.69080200  | -1.66142500 | -0.60142300 |
| C | 6.52680000  | -2.09475400 | 1.22976100  |
| H | 7.32452300  | -2.80886800 | 1.39133400  |
| C | 5.50581100  | -3.62794500 | -0.48921300 |
| C | 7.54315300  | -0.62404100 | 2.98218500  |
| F | 5.75949600  | -3.37166900 | -1.80492800 |
| F | 6.44028300  | -4.50705600 | -0.07614700 |
| F | 4.30975100  | -4.25416800 | -0.45189900 |
| F | 8.72468000  | -1.20492000 | 2.67038700  |
| F | 7.77094200  | 0.69376700  | 3.15565700  |
| F | 7.16978900  | -1.12209900 | 4.18500600  |
| S | 4.61491400  | 3.04276600  | 0.95892900  |
| H | 5.49223900  | 0.98434300  | 2.26396200  |
| C | -1.14257600 | 2.30471600  | 1.85126300  |
| H | 2.56833700  | 0.15656600  | 0.19461000  |
| H | -1.88735900 | 3.00240300  | 1.45726500  |
| O | 1.22468100  | -1.15923000 | -0.01587800 |
| H | 1.61854600  | 1.83956400  | -0.59166600 |
| O | 0.82486100  | -1.50198900 | 2.45044500  |
| H | -1.03109100 | 1.55473100  | 0.73432600  |
| C | -5.84490400 | -3.77764900 | 0.06716500  |
| C | -5.45885600 | -3.19555500 | -1.13431500 |
| C | -4.68380900 | -2.02381600 | -1.15258000 |
| C | -4.66625300 | -2.01686300 | 1.29036300  |
| C | -5.47644800 | -3.16414100 | 1.26250900  |
| C | -2.03950200 | -0.80294600 | -2.87797100 |
| C | -3.39990600 | -0.72942700 | -3.15979900 |
| C | -3.82854300 | 0.02515000  | -4.26215900 |
| C | -2.90122400 | 0.55278800  | -5.15534000 |
| C | -1.54352100 | 0.30074800  | -4.95100600 |
| C | -1.07240300 | -0.36663400 | -3.80557900 |
| H | -5.81374200 | -3.57457500 | 2.20956500  |

|   |             |             |             |
|---|-------------|-------------|-------------|
| H | -0.81879600 | 0.63290500  | -5.68794800 |
| C | -4.58422700 | -1.49514900 | -2.58122000 |
| C | -4.77431300 | -2.83155700 | -3.38221600 |
| H | -3.80946800 | -3.34936100 | -3.43171600 |
| H | -5.11131100 | -2.65773100 | -4.40829600 |
| H | -5.74978900 | -0.48734800 | -5.13260300 |
| H | -5.70634700 | 1.12261000  | -4.42609300 |
| C | -4.22614700 | -1.50053300 | 0.05632700  |
| H | -6.44257400 | -4.68544400 | 0.07878900  |
| H | -3.22487900 | 1.11861500  | -6.02534200 |
| C | -5.76273000 | -3.66050900 | -2.54002000 |
| H | -5.62452300 | -4.74034900 | -2.66532200 |
| H | -6.80478000 | -3.44221700 | -2.81307000 |
| C | -5.34133100 | 0.09713700  | -4.29692600 |
| C | -5.74609100 | -0.50790100 | -2.93138600 |
| H | -5.78287300 | 0.27932100  | -2.16952100 |
| H | -6.72278100 | -1.00125500 | -2.94950500 |
| C | 0.38173400  | -0.67717700 | -3.64996700 |
| C | 1.34794300  | 0.36069900  | -3.65253200 |
| C | 0.79996400  | -2.03336100 | -3.58941300 |
| C | 1.00816400  | 1.74865300  | -3.76893300 |
| C | 2.75332700  | 0.03013200  | -3.55398800 |
| C | 2.20339200  | -2.34308200 | -3.43885500 |
| C | 1.97612000  | 2.71747000  | -3.85598000 |
| H | -0.03745300 | 2.03102100  | -3.80624800 |
| C | 3.72785700  | 1.07569300  | -3.61004800 |
| C | 3.14004200  | -1.30600900 | -3.41972700 |
| C | 3.35787500  | 2.38279900  | -3.77579800 |
| H | 1.68620700  | 3.75741100  | -3.98505600 |
| H | 4.77725700  | 0.80346400  | -3.53001100 |
| H | 4.19516200  | -1.54850100 | -3.31422200 |
| H | 4.10896200  | 3.16523100  | -3.83299000 |
| C | -4.42256200 | -1.36520700 | 2.61695800  |
| C | -3.60383300 | -1.99189800 | 3.58563000  |
| C | -5.14375400 | -0.18813500 | 2.94241500  |
| C | -2.84293100 | -3.17301700 | 3.30982700  |
| C | -3.51177000 | -1.42786200 | 4.91413400  |
| C | -5.02935000 | 0.37285000  | 4.27021700  |
| C | -2.07022300 | -3.76153800 | 4.27597200  |
| H | -2.86010100 | -3.58414100 | 2.30799200  |
| C | -2.69737000 | -2.07744800 | 5.89391300  |
| C | -4.22257900 | -0.26380100 | 5.21770000  |
| C | -2.00024700 | -3.21426800 | 5.58866300  |
| H | -1.48728600 | -4.64504200 | 4.03429800  |

|   |             |             |             |
|---|-------------|-------------|-------------|
| H | -2.64386900 | -1.64230100 | 6.88911700  |
| H | -4.15160200 | 0.15434300  | 6.22004300  |
| H | -1.38100700 | -3.69705000 | 6.33963300  |
| C | 0.33713300  | -4.43447200 | -3.64248900 |
| H | -0.37410000 | -5.24981800 | -3.74503900 |
| C | -0.10210000 | -3.13853100 | -3.71267700 |
| H | -1.15410100 | -2.94376700 | -3.88387400 |
| C | 1.71371600  | -4.72852300 | -3.43619800 |
| H | 2.04042800  | -5.76214200 | -3.36444000 |
| C | 2.62021400  | -3.70843100 | -3.34338500 |
| H | 3.67549800  | -3.91354400 | -3.19326500 |
| C | -6.69771300 | 1.61157400  | 2.36819400  |
| H | -7.35185100 | 2.09179700  | 1.64520500  |
| C | -6.56622200 | 2.16885600  | 3.67167200  |
| H | -7.11532400 | 3.06998400  | 3.93092400  |
| C | -5.75702100 | 1.56092800  | 4.59300400  |
| H | -5.65447200 | 1.96868700  | 5.59608100  |
| C | -6.01502000 | 0.47550100  | 2.01863700  |
| H | -6.13833700 | 0.06197000  | 1.02407400  |
| C | 1.12139500  | 2.18575200  | 2.91951100  |
| H | 1.11824800  | 1.09719000  | 2.80507300  |
| H | 2.13296200  | 2.57137600  | 2.78323900  |
| H | 0.82301700  | 2.38095500  | 3.96291800  |
| C | -1.69280500 | 1.27191100  | 2.83450600  |
| H | -1.01765800 | 0.42888700  | 2.99540800  |
| H | -1.88921400 | 1.74374100  | 3.80551600  |
| H | -2.63792200 | 0.87259300  | 2.46581700  |
| C | 0.90474100  | 6.09178300  | -0.16662400 |
| C | 1.16798600  | 6.97474400  | 0.89269500  |
| C | 0.95245600  | 6.62195900  | -1.46781100 |
| C | 1.44929500  | 8.32394100  | 0.66507000  |
| H | 1.15363400  | 6.62794100  | 1.91958000  |
| C | 1.23822500  | 7.96639100  | -1.70002700 |
| H | 0.76024200  | 5.98288000  | -2.32359100 |
| C | 1.48671500  | 8.82904100  | -0.63248300 |
| H | 1.64273800  | 8.97689600  | 1.51203000  |
| H | 1.26392700  | 8.33843000  | -2.72093100 |
| H | 1.70736600  | 9.87784700  | -0.81032100 |
| C | -0.50199500 | 4.06444100  | -0.86183400 |
| H | -0.21471800 | 4.24451400  | -1.90729700 |
| H | -0.53129900 | 2.97241600  | -0.79854900 |
| C | -1.93242200 | 4.56775400  | -0.70286400 |
| C | -2.29088000 | 5.62520500  | 0.04397200  |
| H | -1.51039600 | 6.17303300  | 0.56549900  |



|   |             |            |             |
|---|-------------|------------|-------------|
| C | -2.90279400 | 3.75312400 | -1.53126000 |
| H | -2.59533300 | 3.74847600 | -2.58671300 |
| H | -2.90922800 | 2.70478000 | -1.20903600 |
| H | -3.92608400 | 4.13117600 | -1.48851300 |
| C | -3.66494600 | 6.20627400 | 0.24033100  |
| H | -3.69900400 | 7.24412500 | -0.11878000 |
| H | -4.45370800 | 5.65038600 | -0.27192400 |
| H | -3.92268200 | 6.23986900 | 1.30766100  |

TS-1-2-6RS-2

l imaginary frequency

H = -5393.905573

G = -5394.113467

E(M06-2X-DCM) = -5394.839138

|   |             |             |             |
|---|-------------|-------------|-------------|
| O | -1.31118700 | -1.38680400 | -1.70708900 |
| O | -3.12008100 | -0.55696600 | -0.01393200 |
| P | -1.52986600 | -0.79600400 | -0.21445000 |
| O | -0.91933100 | 0.61925900  | -0.08076700 |
| N | -1.05832100 | -1.91851400 | 0.81605900  |
| S | 0.49528000  | -2.20294100 | 1.08072600  |
| C | 0.64969000  | -4.00864600 | 0.62865500  |
| F | 0.24112100  | -4.20673200 | -0.62480600 |
| F | -0.09390000 | -4.75669700 | 1.45282600  |
| F | 1.92868000  | -4.37277500 | 0.74234300  |
| C | -0.14425700 | 4.41935100  | 0.52681200  |
| C | 0.04095400  | 3.98952800  | 2.02980400  |
| H | -0.73985300 | 4.48699000  | 2.61739900  |
| H | 0.99664000  | 4.41092400  | 2.35523600  |
| C | -0.00448500 | 2.53500000  | 2.44944200  |
| C | 1.06349800  | 3.84022900  | -0.27151000 |
| H | 0.84855300  | 3.84073100  | -1.34232700 |
| H | 1.93511900  | 4.47035300  | -0.10333200 |
| N | 1.50185000  | 2.49801300  | 0.11134300  |
| C | 2.81713700  | 2.22115100  | 0.43333300  |
| N | 3.07495600  | 0.88029700  | 0.51395300  |
| C | 4.28476000  | 0.19811800  | 0.79415900  |
| C | 5.28268900  | 0.67380800  | 1.65610300  |
| C | 4.44131900  | -1.06465500 | 0.20522900  |
| C | 6.42316500  | -0.09677400 | 1.88549100  |
| C | 5.58443100  | -1.82249000 | 0.45178400  |
| H | 3.65960900  | -1.46002800 | -0.43064300 |
| C | 6.59287300  | -1.34455500 | 1.28603500  |
| H | 7.48468200  | -1.93051100 | 1.47058500  |
| C | 5.73206000  | -3.14743900 | -0.24619900 |

|   |             |             |             |
|---|-------------|-------------|-------------|
| C | 7.45652300  | 0.39715800  | 2.86438800  |
| F | 6.08622500  | -2.98904700 | -1.55440700 |
| F | 6.68168100  | -3.92121400 | 0.31812300  |
| F | 4.57871500  | -3.84836900 | -0.24993700 |
| F | 8.69239400  | -0.06195700 | 2.56158100  |
| F | 7.52052700  | 1.74427700  | 2.89973600  |
| F | 7.18474500  | -0.01709000 | 4.12514200  |
| S | 3.94988400  | 3.43418800  | 0.74716300  |
| H | 5.17789800  | 1.63789700  | 2.13013000  |
| C | -1.14298500 | 1.74323000  | 2.32090300  |
| H | 2.32255000  | 0.23567400  | 0.26066200  |
| H | -2.05201800 | 2.27797600  | 2.04033200  |
| O | 1.38287500  | -1.50235700 | 0.11755500  |
| H | 0.94693800  | 1.72666800  | -0.25450800 |
| O | 0.84005900  | -2.12135500 | 2.50315600  |
| H | -0.93299100 | 1.17325100  | 1.08693100  |
| C | -5.72846300 | -3.81177500 | -0.46722400 |
| C | -5.24532400 | -3.13124000 | -1.57843200 |
| C | -4.43284800 | -1.99462400 | -1.43063000 |
| C | -4.56698000 | -2.23262500 | 0.99761000  |
| C | -5.41486100 | -3.33631500 | 0.80408300  |
| C | -1.64367800 | -0.69238000 | -2.87872900 |
| C | -2.98604300 | -0.55145800 | -3.22191500 |
| C | -3.33330400 | 0.31047300  | -4.27360000 |
| C | -2.34648200 | 0.87682300  | -5.07376000 |
| C | -1.01070500 | 0.55805100  | -4.82814900 |
| C | -0.61637600 | -0.21639800 | -3.72088700 |
| H | -5.82340400 | -3.82692100 | 1.68234700  |
| H | -0.24018500 | 0.92014600  | -5.50143700 |
| C | -4.22475600 | -1.33080400 | -2.78878800 |
| C | -4.40232200 | -2.57423100 | -3.73051200 |
| H | -3.45274500 | -3.12025700 | -3.77107400 |
| H | -4.66473500 | -2.28803100 | -4.75306500 |
| H | -5.21811900 | -0.04603300 | -5.28954500 |
| H | -5.16254200 | 1.48601800  | -4.42750900 |
| C | -4.03784000 | -1.61223600 | -0.14998300 |
| H | -6.35693300 | -4.69096600 | -0.58327500 |
| H | -2.60790700 | 1.52347900  | -5.90757700 |
| C | -5.46992600 | -3.44423300 | -3.03986300 |
| H | -5.35739500 | -4.51102400 | -3.26372400 |
| H | -6.48421200 | -3.16120800 | -3.35471800 |
| C | -4.83848700 | 0.43993600  | -4.38046400 |
| C | -5.33662200 | -0.27685300 | -3.10375300 |
| H | -5.39438600 | 0.43537900  | -2.27259100 |

|   |             |             |             |
|---|-------------|-------------|-------------|
| H | -6.32391900 | -0.73390800 | -3.22136800 |
| C | 0.82273900  | -0.57943400 | -3.53487500 |
| C | 1.81611900  | 0.43043900  | -3.43995700 |
| C | 1.20526600  | -1.94793300 | -3.55010300 |
| C | 1.52255500  | 1.83282900  | -3.47300400 |
| C | 3.20734600  | 0.05517600  | -3.31370500 |
| C | 2.59390700  | -2.30377200 | -3.36732300 |
| C | 2.51685800  | 2.77707400  | -3.43236900 |
| H | 0.48955900  | 2.15054200  | -3.54497300 |
| C | 4.21090500  | 1.07187400  | -3.24919000 |
| C | 3.55469300  | -1.29624000 | -3.25328000 |
| C | 3.88337000  | 2.39827100  | -3.31691300 |
| H | 2.25932900  | 3.83195100  | -3.47991800 |
| H | 5.24754700  | 0.76148400  | -3.14610600 |
| H | 4.59721800  | -1.57132300 | -3.11631000 |
| H | 4.65394800  | 3.16137200  | -3.26677500 |
| C | -4.36780300 | -1.74293000 | 2.39850100  |
| C | -3.66724300 | -2.53770100 | 3.33762800  |
| C | -5.01650900 | -0.55126400 | 2.81212900  |
| C | -2.96347400 | -3.72999100 | 2.97197200  |
| C | -3.63600700 | -2.13882600 | 4.72719800  |
| C | -4.95937200 | -0.15549400 | 4.20176800  |
| C | -2.30399900 | -4.48104600 | 3.90891200  |
| H | -2.92805000 | -4.01768500 | 1.92848800  |
| C | -2.94398900 | -2.95747700 | 5.67389100  |
| C | -4.28095700 | -0.96292800 | 5.11926900  |
| C | -2.30063200 | -4.09890800 | 5.28056100  |
| H | -1.75951300 | -5.36842200 | 3.60032300  |
| H | -2.93711700 | -2.64578800 | 6.71570100  |
| H | -4.25589600 | -0.66873300 | 6.16679500  |
| H | -1.77261600 | -4.70994600 | 6.00738600  |
| C | 0.69198300  | -4.32825700 | -3.78107900 |
| H | -0.03217600 | -5.11673100 | -3.96849600 |
| C | 0.28510400  | -3.01977000 | -3.78366800 |
| H | -0.75387100 | -2.78822400 | -3.98656500 |
| C | 2.05000900  | -4.67139700 | -3.53027200 |
| H | 2.34776700  | -5.71596900 | -3.50717600 |
| C | 2.97418100  | -3.68251400 | -3.33349500 |
| H | 4.01707800  | -3.92033900 | -3.14430100 |
| C | -6.37504900 | 1.43064000  | 2.35370000  |
| H | -6.93271200 | 2.04401600  | 1.65085800  |
| C | -6.29853000 | 1.82461000  | 3.71976700  |
| H | -6.79274800 | 2.73533900  | 4.04708800  |
| C | -5.61291400 | 1.04797600  | 4.61421600  |

|   |             |             |             |
|---|-------------|-------------|-------------|
| H | -5.55516200 | 1.32933300  | 5.66322800  |
| C | -5.76099200 | 0.28501500  | 1.91831100  |
| H | -5.84288600 | -0.00222400 | 0.87621100  |
| C | 1.17293600  | 2.02472200  | 3.22334000  |
| H | 1.32561900  | 0.94932100  | 3.09842900  |
| H | 2.09309100  | 2.56169700  | 2.98665900  |
| H | 0.95746000  | 2.18326600  | 4.29258600  |
| C | -1.38770300 | 0.53654100  | 3.22254300  |
| H | -0.54840800 | -0.16071800 | 3.25897600  |
| H | -1.60103300 | 0.86979100  | 4.24631600  |
| H | -2.25492800 | -0.02201400 | 2.87117600  |
| C | -0.11426500 | 5.96784200  | 0.50832900  |
| C | -1.02666900 | 6.69047400  | 1.29785600  |
| C | 0.76247100  | 6.71165500  | -0.29481800 |
| C | -1.04846700 | 8.08301500  | 1.30526000  |
| H | -1.74694000 | 6.16278800  | 1.91685200  |
| C | 0.74149400  | 8.10964500  | -0.29567500 |
| H | 1.48241700  | 6.21736500  | -0.93646500 |
| C | -0.15872100 | 8.80419400  | 0.50718900  |
| H | -1.76489500 | 8.60446100  | 1.93479800  |
| H | 1.44100700  | 8.65046200  | -0.92758700 |
| H | -0.17049200 | 9.89064900  | 0.51154300  |
| C | -1.53730200 | 3.94260000  | -0.03688000 |
| H | -1.46433900 | 2.87823100  | -0.28605200 |
| H | -2.26707500 | 4.02319700  | 0.77552200  |
| C | -2.12649100 | 4.67772000  | -1.23342200 |
| C | -3.26940700 | 5.36576100  | -1.07729900 |
| H | -3.70245500 | 5.39292600  | -0.07628300 |
| C | -1.41923500 | 4.53248100  | -2.55910700 |
| H | -0.47667300 | 5.09510200  | -2.57759400 |
| H | -1.17594700 | 3.48055400  | -2.75495900 |
| H | -2.02207600 | 4.89140100  | -3.39642600 |
| C | -4.05385900 | 6.13827600  | -2.09984300 |
| H | -4.08900500 | 7.20345300  | -1.83238300 |
| H | -3.64251100 | 6.06835600  | -3.11003800 |
| H | -5.09578500 | 5.79179000  | -2.13620300 |

TS-1-2-6RR

l imaginary frequency

H = -5393.912117

G = -5394.119156

E(M06-2X-DCM) = -5394.844611

|   |            |             |            |
|---|------------|-------------|------------|
| 0 | 1.47345600 | -0.90580900 | 1.87484900 |
| 0 | 3.24808300 | -0.20082000 | 0.09463000 |

|   |             |             |             |
|---|-------------|-------------|-------------|
| P | 1.66686500  | -0.49118700 | 0.31727200  |
| O | 0.96548800  | 0.84623000  | 0.01256000  |
| N | 1.27350900  | -1.77239400 | -0.55265700 |
| S | -0.25179200 | -2.17010700 | -0.80747400 |
| C | -0.31496100 | -3.92910100 | -0.18223700 |
| F | 0.06386200  | -3.97720400 | 1.09480500  |
| F | 0.49424400  | -4.71168000 | -0.90672400 |
| F | -1.56787000 | -4.37725200 | -0.29122400 |
| C | -0.49370800 | 4.37790700  | -1.25354000 |
| C | -0.58730400 | 3.66720700  | -2.64639200 |
| H | 0.02637200  | 4.23960400  | -3.35748700 |
| H | -1.62473900 | 3.76144600  | -2.97871800 |
| C | -0.16734300 | 2.22250900  | -2.81107600 |
| C | -1.52070500 | 3.70508000  | -0.29179700 |
| H | -1.22513400 | 3.83750200  | 0.74830700  |
| H | -2.47222700 | 4.22016900  | -0.40841300 |
| N | -1.81201500 | 2.28949300  | -0.51672900 |
| C | -3.06696700 | 1.84580400  | -0.87717000 |
| N | -3.20638700 | 0.49180200  | -0.75398500 |
| C | -4.33880800 | -0.33747300 | -0.92450000 |
| C | -5.38448500 | -0.09436200 | -1.82647000 |
| C | -4.36693400 | -1.50748800 | -0.15118800 |
| C | -6.44567400 | -0.99651000 | -1.91227200 |
| C | -5.43628800 | -2.39452100 | -0.25044600 |
| H | -3.54561100 | -1.72435400 | 0.52122000  |
| C | -6.49239000 | -2.14685800 | -1.12490200 |
| H | -7.32767000 | -2.83249200 | -1.19475300 |
| C | -5.45664800 | -3.59143500 | 0.66016900  |
| C | -7.52968600 | -0.75851700 | -2.93150800 |
| F | -5.78247400 | -3.23734500 | 1.93739900  |
| F | -6.35696000 | -4.51782700 | 0.27426900  |
| F | -4.25081500 | -4.19400600 | 0.73173000  |
| F | -8.71559000 | -1.27021000 | -2.52895000 |
| F | -7.71650100 | 0.55437400  | -3.17877300 |
| F | -7.23442100 | -1.34458200 | -4.11638300 |
| S | -4.26446300 | 2.88880400  | -1.45837900 |
| C | -1.01777800 | 5.84795300  | -1.50427300 |
| H | -1.95628000 | 5.75197900  | -2.06145800 |
| H | -0.30814500 | 6.35637500  | -2.16982400 |
| H | -5.37714000 | 0.79408600  | -2.43948100 |
| C | 1.10241400  | 1.75111300  | -2.48600900 |
| H | -2.40728700 | -0.02807500 | -0.38156400 |
| H | 1.83500200  | 2.52137800  | -2.24213100 |
| O | -1.20312700 | -1.44144000 | 0.07347700  |

|   |             |             |             |
|---|-------------|-------------|-------------|
| H | -1.20514200 | 1.62737300  | -0.03779100 |
| O | -0.57984700 | -2.24240300 | -2.23599200 |
| H | 0.93355300  | 1.30582100  | -1.20821700 |
| C | 5.98898100  | -3.26051400 | 0.96169000  |
| C | 5.46311700  | -2.47135100 | 1.97724100  |
| C | 4.60761200  | -1.39559300 | 1.68556500  |
| C | 4.79337600  | -1.91199400 | -0.69403900 |
| C | 5.67971100  | -2.94986600 | -0.36043500 |
| C | 1.75760900  | -0.05122800 | 2.94611000  |
| C | 3.08751800  | 0.19435200  | 3.27691100  |
| C | 3.38580400  | 1.19519300  | 4.21456800  |
| C | 2.36506800  | 1.81212200  | 4.93170300  |
| C | 1.04754500  | 1.40369000  | 4.72021600  |
| C | 0.70127600  | 0.47930400  | 3.71686200  |
| H | 6.12476400  | -3.52059800 | -1.16991000 |
| H | 0.25460300  | 1.81075300  | 5.33963700  |
| C | 4.35969200  | -0.58055900 | 2.95164000  |
| C | 4.57383100  | -1.69155500 | 4.03964100  |
| H | 3.64533300  | -2.26543100 | 4.13960300  |
| H | 4.81315300  | -1.27292500 | 5.02147700  |
| H | 5.26805500  | 1.03614100  | 5.28317100  |
| H | 5.17089900  | 2.45041000  | 4.24346600  |
| C | 4.21344600  | -1.18590400 | 0.36449500  |
| H | 6.64875400  | -4.09381100 | 1.18912300  |
| H | 2.58751300  | 2.56765200  | 5.68102700  |
| C | 5.68159500  | -2.59627100 | 3.46751900  |
| H | 5.60649400  | -3.63173200 | 3.81826900  |
| H | 6.68067300  | -2.23826000 | 3.75339300  |
| C | 4.88413700  | 1.39502600  | 4.31856800  |
| C | 5.42567600  | 0.54790700  | 3.14297700  |
| H | 5.46526100  | 1.15421100  | 2.23053900  |
| H | 6.42872000  | 0.14928100  | 3.32313500  |
| C | -0.71527300 | 0.02663700  | 3.56194600  |
| C | -1.75410500 | 0.96516200  | 3.32803800  |
| C | -1.02975800 | -1.34825000 | 3.73523900  |
| C | -1.53264100 | 2.37711000  | 3.21189200  |
| C | -3.12009700 | 0.50261900  | 3.20889100  |
| C | -2.39270600 | -1.79722600 | 3.56644800  |
| C | -2.57239100 | 3.25658700  | 3.04302400  |
| H | -0.51973500 | 2.75766300  | 3.27558500  |
| C | -4.17052100 | 1.45068500  | 3.00194500  |
| C | -3.39766700 | -0.86354000 | 3.30148400  |
| C | -3.91289600 | 2.79258300  | 2.93228000  |
| H | -2.37050900 | 4.32259200  | 2.97776300  |

|   |             |             |             |
|---|-------------|-------------|-------------|
| H | -5.18643000 | 1.07602500  | 2.90592700  |
| H | -4.42077700 | -1.20940600 | 3.17445500  |
| H | -4.72040600 | 3.50214800  | 2.77930900  |
| C | 4.62334500  | -1.58789500 | -2.14655500 |
| C | 3.95048100  | -2.48658700 | -3.00788800 |
| C | 5.28361900  | -0.44883100 | -2.67442500 |
| C | 3.25371000  | -3.64261400 | -2.53020700 |
| C | 3.94697900  | -2.24074600 | -4.43301500 |
| C | 5.25785000  | -0.20817100 | -4.10000700 |
| C | 2.62240600  | -4.49836700 | -3.39401100 |
| H | 3.20232500  | -3.81834300 | -1.46286800 |
| C | 3.28113500  | -3.16332800 | -5.29945800 |
| C | 4.59681900  | -1.11126800 | -4.93742200 |
| C | 2.64140700  | -4.26386300 | -4.79831600 |
| H | 2.08314000  | -5.35575800 | -3.00311500 |
| H | 3.29350600  | -2.96568700 | -6.36877700 |
| H | 4.59352200  | -0.93324500 | -6.01113700 |
| H | 2.13463000  | -4.95571500 | -5.46542900 |
| C | -0.40267400 | -3.65168100 | 4.26828000  |
| H | 0.35519200  | -4.37139800 | 4.56634000  |
| C | -0.06311100 | -2.33278100 | 4.11781200  |
| H | 0.95665600  | -2.02267700 | 4.31285800  |
| C | -1.73485400 | -4.09415000 | 4.03636900  |
| H | -1.97971600 | -5.14764300 | 4.13876400  |
| C | -2.70232900 | -3.18775600 | 3.69977800  |
| H | -3.72627000 | -3.50387800 | 3.52447400  |
| C | 6.63921500  | 1.56940400  | -2.40712500 |
| H | 7.18306800  | 2.25628100  | -1.76398500 |
| C | 6.59462900  | 1.81018700  | -3.80953900 |
| H | 7.09951500  | 2.67848800  | -4.22422000 |
| C | 5.92463900  | 0.94155600  | -4.62788000 |
| H | 5.89017300  | 1.10622000  | -5.70241400 |
| C | 6.01023200  | 0.48061600  | -1.86159000 |
| H | 6.06550900  | 0.31111600  | -0.79226200 |
| C | 0.95754700  | 4.42992900  | -0.73588200 |
| C | 1.94129200  | 5.08279700  | -1.50386300 |
| C | 1.36456400  | 3.87646000  | 0.48448800  |
| C | 3.26129000  | 5.18388300  | -1.07105300 |
| H | 1.67801700  | 5.52241300  | -2.46239600 |
| C | 2.68769900  | 3.97608600  | 0.92608200  |
| H | 0.66396800  | 3.33219500  | 1.10497700  |
| C | 3.64238100  | 4.63297500  | 0.15474700  |
| H | 3.99243400  | 5.69404300  | -1.69274100 |
| H | 2.96269100  | 3.52404100  | 1.87524800  |

|   |             |             |             |
|---|-------------|-------------|-------------|
| H | 4.67098900  | 4.71066700  | 0.49614400  |
| C | -1.27337900 | 6.72904000  | -0.29027600 |
| C | -2.54390700 | 6.98020100  | 0.07279700  |
| H | -3.33387700 | 6.51457300  | -0.51829600 |
| C | -0.06731000 | 7.33015800  | 0.39525800  |
| H | 0.52576300  | 6.57323400  | 0.92086100  |
| H | 0.60551800  | 7.78830600  | -0.34129200 |
| H | -0.34165500 | 8.10133000  | 1.11891400  |
| C | -1.13265700 | 1.33207700  | -3.53392800 |
| H | -1.06375200 | 0.28740700  | -3.21662500 |
| H | -2.16367300 | 1.67982300  | -3.44783500 |
| H | -0.86260300 | 1.34572900  | -4.60247300 |
| C | 1.68566600  | 0.51844700  | -3.17263500 |
| H | 1.02933900  | -0.35347500 | -3.13464700 |
| H | 1.89895400  | 0.73864000  | -4.22632600 |
| H | 2.62701600  | 0.24149200  | -2.69840000 |
| C | -3.04882700 | 7.83287400  | 1.20285000  |
| H | -3.66302700 | 7.23637700  | 1.89144700  |
| H | -2.25253000 | 8.29888600  | 1.78875600  |
| H | -3.70027200 | 8.63237900  | 0.82428300  |

TS-1-2-6RR-1

l imaginary frequency

H = -5393.909904

G = -5394.117556

E(M06-2X-DCM) = -5394.843341

|   |             |             |             |
|---|-------------|-------------|-------------|
| O | 1.37905900  | -0.96764600 | 1.88623100  |
| O | 3.16878500  | -0.42223400 | 0.06588100  |
| P | 1.57499000  | -0.59938900 | 0.31714500  |
| O | 0.95948500  | 0.77459400  | -0.00841600 |
| N | 1.08435300  | -1.87100100 | -0.51725700 |
| S | -0.46793000 | -2.17168600 | -0.74026800 |
| C | -0.63482200 | -3.91141500 | -0.08119100 |
| F | -0.23735200 | -3.96238900 | 1.19020300  |
| F | 0.10876200  | -4.75816700 | -0.80415700 |
| F | -1.91595200 | -4.27851500 | -0.16098000 |
| C | -0.22373000 | 4.38386400  | -1.32829200 |
| C | -0.36562800 | 3.66905100  | -2.71478000 |
| H | 0.31633500  | 4.16389000  | -3.42087200 |
| H | -1.38165000 | 3.86776800  | -3.06812000 |
| C | -0.09536600 | 2.18632700  | -2.85256700 |
| C | -1.34030000 | 3.83236500  | -0.39228100 |
| H | -1.09413400 | 4.00942500  | 0.65510600  |
| H | -2.25360600 | 4.38632200  | -0.60427200 |



|   |             |             |             |
|---|-------------|-------------|-------------|
| N | -1.70762700 | 2.42643500  | -0.55611500 |
| C | -2.99128400 | 2.03878300  | -0.88374200 |
| N | -3.19853700 | 0.69793000  | -0.72617800 |
| C | -4.37641300 | -0.07029200 | -0.88355300 |
| C | -5.37864700 | 0.19019000  | -1.82875200 |
| C | -4.49706200 | -1.19618100 | -0.05721700 |
| C | -6.49012900 | -0.64953600 | -1.90561100 |
| C | -5.61448000 | -2.02353700 | -0.14990500 |
| H | -3.70976300 | -1.42774900 | 0.64991400  |
| C | -6.62803600 | -1.75606500 | -1.06722800 |
| H | -7.50072400 | -2.39394800 | -1.13149600 |
| C | -5.72667600 | -3.17772700 | 0.80786900  |
| C | -7.52830500 | -0.39792800 | -2.96824300 |
| F | -6.01797900 | -2.74882000 | 2.07029400  |
| F | -6.69814400 | -4.04515500 | 0.45974800  |
| F | -4.57146000 | -3.87012600 | 0.90220300  |
| F | -8.75408500 | -0.81733100 | -2.57888700 |
| F | -7.62717800 | 0.90996100  | -3.28353000 |
| F | -7.23614000 | -1.05843700 | -4.11412200 |
| S | -4.14761700 | 3.12568000  | -1.46742800 |
| C | -0.55366600 | 5.90432000  | -1.61240300 |
| H | -1.53436300 | 5.93139800  | -2.10629100 |
| H | 0.17340800  | 6.26439200  | -2.34736000 |
| H | -5.29894500 | 1.04453400  | -2.48374000 |
| C | 1.12786100  | 1.60178100  | -2.53128900 |
| H | -2.42851600 | 0.14199300  | -0.34421100 |
| H | 1.93362800  | 2.30423100  | -2.31310800 |
| O | -1.35381000 | -1.36620200 | 0.14163300  |
| H | -1.13009400 | 1.75066300  | -0.05992000 |
| O | -0.82555300 | -2.24848400 | -2.16147100 |
| H | 0.94540800  | 1.20594600  | -1.24192100 |
| C | 5.70391100  | -3.65402200 | 0.93613800  |
| C | 5.25151400  | -2.81571300 | 1.94761500  |
| C | 4.46840500  | -1.68681700 | 1.65328000  |
| C | 4.57709100  | -2.24875100 | -0.72063000 |
| C | 5.39455700  | -3.34122400 | -0.38536000 |
| C | 1.74352500  | -0.12057200 | 2.93832700  |
| C | 3.09294400  | 0.02998700  | 3.24593500  |
| C | 3.47911500  | 1.01768100  | 4.16536500  |
| C | 2.51873600  | 1.71648100  | 4.89052600  |
| C | 1.17126800  | 1.40482200  | 4.70371900  |
| C | 0.74198000  | 0.49780700  | 3.71699000  |
| H | 5.78451600  | -3.95326600 | -1.19304700 |
| H | 0.42063900  | 1.87644600  | 5.33003200  |

|   |             |             |             |
|---|-------------|-------------|-------------|
| C | 4.30037600  | -0.83885300 | 2.91092500  |
| C | 4.45378400  | -1.94731300 | 4.01181900  |
| H | 3.48905000  | -2.45295800 | 4.13463900  |
| H | 4.73808800  | -1.53336900 | 4.98358700  |
| H | 5.36369700  | 0.73584700  | 5.20436000  |
| H | 5.34951600  | 2.14127200  | 4.14827000  |
| C | 4.06736300  | -1.46849100 | 0.33558900  |
| H | 6.30769900  | -4.52814800 | 1.16581800  |
| H | 2.80860300  | 2.46154900  | 5.62719000  |
| C | 5.48583900  | -2.93509200 | 3.43587600  |
| H | 5.34471200  | -3.95786800 | 3.80311800  |
| H | 6.51209000  | -2.64383800 | 3.70055900  |
| C | 4.98937800  | 1.11013900  | 4.24184000  |
| C | 5.44741400  | 0.21292300  | 3.06819400  |
| H | 5.51208700  | 0.80414900  | 2.14738600  |
| H | 6.42290500  | -0.25381400 | 3.23548100  |
| C | -0.70688900 | 0.15271300  | 3.58641600  |
| C | -1.67420700 | 1.16462100  | 3.35208300  |
| C | -1.12313100 | -1.19126200 | 3.78431900  |
| C | -1.34804600 | 2.55489700  | 3.22282900  |
| C | -3.07263300 | 0.80613900  | 3.25275200  |
| C | -2.51846200 | -1.53704600 | 3.63884900  |
| C | -2.32078900 | 3.50930200  | 3.06108600  |
| H | -0.30936400 | 2.85900100  | 3.27779300  |
| C | -4.05038500 | 1.82910300  | 3.04582900  |
| C | -3.45230800 | -0.53346100 | 3.36882500  |
| C | -3.69355600 | 3.14746100  | 2.96453400  |
| H | -2.03990700 | 4.55784500  | 3.00193700  |
| H | -5.09259700 | 1.53160200  | 2.96279100  |
| H | -4.50032400 | -0.80191100 | 3.25882100  |
| H | -4.44695800 | 3.91502900  | 2.81558500  |
| C | 4.40489500  | -1.93689600 | -2.17554700 |
| C | 3.66173400  | -2.80440300 | -3.01094700 |
| C | 5.12915000  | -0.85230800 | -2.73344300 |
| C | 2.89602800  | -3.90210700 | -2.50215200 |
| C | 3.65366500  | -2.58450100 | -4.44026300 |
| C | 5.09839600  | -0.63606300 | -4.16283200 |
| C | 2.19612700  | -4.72880400 | -3.34105900 |
| H | 2.84750500  | -4.05414500 | -1.43107800 |
| C | 2.91572300  | -3.47626600 | -5.28018400 |
| C | 4.36865000  | -1.50935400 | -4.97440400 |
| C | 2.21097300  | -4.52199700 | -4.74974700 |
| H | 1.60554000  | -5.54010800 | -2.92662900 |
| H | 2.92589400  | -3.29934600 | -6.35315100 |

|   |             |             |             |
|---|-------------|-------------|-------------|
| H | 4.36179500  | -1.35096900 | -6.05118000 |
| H | 1.64950800  | -5.19025600 | -5.39683000 |
| C | -0.66652200 | -3.52691000 | 4.34851300  |
| H | 0.03805500  | -4.29781900 | 4.64922400  |
| C | -0.22920300 | -2.24060400 | 4.17125800  |
| H | 0.81385300  | -2.00634400 | 4.34807000  |
| C | -2.03176400 | -3.86944000 | 4.14103300  |
| H | -2.35514400 | -4.89917200 | 4.26491000  |
| C | -2.93165700 | -2.89732100 | 3.80043500  |
| H | -3.97896600 | -3.13699200 | 3.64355000  |
| C | 6.61572200  | 1.07839800  | -2.52209200 |
| H | 7.21178700  | 1.74009800  | -1.89914600 |
| C | 6.56702500  | 1.29607600  | -3.92816000 |
| H | 7.12128800  | 2.12196800  | -4.36581700 |
| C | 5.83064500  | 0.45815600  | -4.72109800 |
| H | 5.79170400  | 0.60515600  | -5.79804100 |
| C | 5.92556700  | 0.04267800  | -1.94791300 |
| H | 5.98466100  | -0.11049700 | -0.87636300 |
| C | 1.20944400  | 4.29862700  | -0.76924400 |
| C | 2.28383900  | 4.77793400  | -1.54371900 |
| C | 1.51324900  | 3.80249900  | 0.50296900  |
| C | 3.59364200  | 4.76131900  | -1.07066600 |
| H | 2.10137400  | 5.17228400  | -2.54019200 |
| C | 2.82547100  | 3.78414200  | 0.98606500  |
| H | 0.73512900  | 3.39463200  | 1.13593600  |
| C | 3.87208500  | 4.26509800  | 0.20524300  |
| H | 4.39673100  | 5.13556600  | -1.70020800 |
| H | 3.01866400  | 3.37965000  | 1.97597600  |
| H | 4.89257300  | 4.25038100  | 0.57834100  |
| C | -0.56333600 | 6.86917400  | -0.43414000 |
| C | 0.52521200  | 7.61694600  | -0.18671500 |
| H | 1.38613100  | 7.47782400  | -0.84072600 |
| C | -1.84759900 | 6.97745500  | 0.36001100  |
| H | -2.71857400 | 6.97466700  | -0.30707400 |
| H | -1.98556000 | 6.13574900  | 1.05031800  |
| H | -1.89037300 | 7.89298200  | 0.95501500  |
| C | -1.14949200 | 1.37971400  | -3.54840400 |
| H | -1.17572800 | 0.33929200  | -3.21159100 |
| H | -2.14173600 | 1.82560500  | -3.45849200 |
| H | -0.89175400 | 1.34848900  | -4.61966100 |
| C | 1.58078900  | 0.30666200  | -3.20107700 |
| H | 0.84688000  | -0.49918100 | -3.13474900 |
| H | 1.79551700  | 0.48566700  | -4.26225600 |
| H | 2.49984700  | -0.04863200 | -2.73571200 |

|   |             |            |            |
|---|-------------|------------|------------|
| C | 0.74040800  | 8.62897200 | 0.90261100 |
| H | 1.03242500  | 9.60038700 | 0.48085000 |
| H | -0.13960100 | 8.78664500 | 1.53134800 |
| H | 1.56388400  | 8.31592000 | 1.55944800 |

TS-1-2-6RR-2

l imaginary frequency

H = -5393.909283

G = -5394.116484

E(M06-2X-DCM) = -5394.843272

|   |             |             |             |
|---|-------------|-------------|-------------|
| O | -1.59801400 | -1.57892300 | -1.36491800 |
| O | -3.22021200 | -0.05169800 | -0.00265200 |
| P | -1.67302800 | -0.52637600 | -0.13016500 |
| O | -0.88303800 | 0.75788600  | -0.44803700 |
| N | -1.30205200 | -1.34187200 | 1.19242200  |
| S | 0.21152800  | -1.72456700 | 1.53544400  |
| C | 0.11691300  | -3.58073900 | 1.71915300  |
| F | -0.35899100 | -4.13183900 | 0.60201700  |
| F | -0.68513800 | -3.90758600 | 2.74091500  |
| F | 1.34255400  | -4.05244000 | 1.95893200  |
| C | 0.55710100  | 4.44663100  | -0.99953100 |
| C | 0.64901300  | 4.50427600  | 0.55916800  |
| H | -0.05783400 | 5.26764000  | 0.91123500  |
| H | 1.64813000  | 4.87288100  | 0.80354200  |
| C | 0.37592200  | 3.26233800  | 1.37924000  |
| C | 1.67498900  | 3.50803800  | -1.52565000 |
| H | 1.53051600  | 3.30194800  | -2.59037500 |
| H | 2.62251600  | 4.03147400  | -1.43505000 |
| N | 1.87554300  | 2.25444700  | -0.80233000 |
| C | 3.11691100  | 1.85400400  | -0.35551800 |
| N | 3.12917900  | 0.57996100  | 0.13763100  |
| C | 4.21292900  | -0.16548500 | 0.66616100  |
| C | 5.21488300  | 0.38083000  | 1.48020800  |
| C | 4.22348800  | -1.54012600 | 0.40321100  |
| C | 6.22293700  | -0.44159700 | 1.98201100  |
| C | 5.23516800  | -2.34912300 | 0.92009600  |
| H | 3.43125300  | -1.97713800 | -0.19142200 |
| C | 6.25078800  | -1.80925600 | 1.70453900  |
| H | 7.04208900  | -2.43664500 | 2.09557100  |
| C | 5.22385800  | -3.81177900 | 0.57031600  |
| C | 7.25916900  | 0.14218000  | 2.90638400  |
| F | 5.52434000  | -4.01201400 | -0.74562800 |
| F | 6.12050500  | -4.52110800 | 1.28489900  |
| F | 4.00920700  | -4.36719300 | 0.76830400  |

|   |             |             |             |
|---|-------------|-------------|-------------|
| F | 8.44366300  | -0.50255600 | 2.80017100  |
| F | 7.48385700  | 1.44932600  | 2.65867500  |
| F | 6.87922500  | 0.04703000  | 4.20319400  |
| S | 4.47076900  | 2.86829400  | -0.37532600 |
| C | 0.84852900  | 5.89638700  | -1.57358900 |
| H | -0.00576700 | 6.52008600  | -1.29534500 |
| H | 0.80558200  | 5.80415300  | -2.66734000 |
| H | 5.21473300  | 1.43596100  | 1.70893600  |
| C | -0.87430800 | 2.64805800  | 1.42715200  |
| H | 2.27782100  | 0.01807500  | 0.05540600  |
| H | -1.68259200 | 3.20938100  | 0.95453300  |
| O | 1.13772300  | -1.51989600 | 0.39199500  |
| H | 1.16820400  | 1.53255900  | -0.92751500 |
| O | 0.63356400  | -1.21784800 | 2.84570600  |
| H | -0.78743200 | 1.70473800  | 0.45423000  |
| C | -6.13381600 | -2.98054200 | 0.74575400  |
| C | -5.64882600 | -2.77567000 | -0.54000000 |
| C | -4.73531400 | -1.74286700 | -0.81073300 |
| C | -4.77116200 | -1.11266200 | 1.54805900  |
| C | -5.72048500 | -2.12571700 | 1.76461900  |
| C | -1.93764200 | -1.27905700 | -2.68787900 |
| C | -3.28147900 | -1.14140600 | -3.02680900 |
| C | -3.61990500 | -0.66370000 | -4.30285000 |
| C | -2.63857400 | -0.49509500 | -5.27467900 |
| C | -1.31857600 | -0.82689100 | -4.96604300 |
| C | -0.92615800 | -1.21022600 | -3.67036200 |
| H | -6.12826500 | -2.23747300 | 2.76470700  |
| H | -0.56023800 | -0.78719900 | -5.74171800 |
| C | -4.54935300 | -1.60877400 | -2.31936800 |
| C | -4.87443200 | -3.07751900 | -2.76728400 |
| H | -3.97525200 | -3.69004700 | -2.63401900 |
| H | -5.16480700 | -3.13812800 | -3.82013000 |
| H | -5.57789400 | -1.18614600 | -5.08015300 |
| H | -5.36629500 | 0.53899500  | -4.81609800 |
| C | -4.24116800 | -0.98359900 | 0.24937000  |
| H | -6.83974200 | -3.78042900 | 0.95375800  |
| H | -2.89593500 | -0.15480700 | -6.27461700 |
| C | -5.97218300 | -3.55147400 | -1.79609000 |
| H | -5.95734500 | -4.63543600 | -1.63586200 |
| H | -6.97506100 | -3.30184300 | -2.17021700 |
| C | -5.11543300 | -0.44816800 | -4.41068500 |
| C | -5.59267600 | -0.62954800 | -2.95120600 |
| H | -5.54369000 | 0.32776700  | -2.41930200 |
| H | -6.61805300 | -1.00369200 | -2.87397100 |

|   |             |             |             |
|---|-------------|-------------|-------------|
| C | 0.48807500  | -1.61727700 | -3.40509800 |
| C | 1.55932900  | -0.72302300 | -3.66314300 |
| C | 0.76082200  | -2.94333000 | -2.97473700 |
| C | 1.37488800  | 0.60447800  | -4.17229700 |
| C | 2.92029500  | -1.15111200 | -3.42326700 |
| C | 2.12362600  | -3.34247200 | -2.70785400 |
| C | 2.44042100  | 1.42328000  | -4.45010600 |
| H | 0.36870500  | 0.95806300  | -4.36270200 |
| C | 4.00040200  | -0.25463200 | -3.69728300 |
| C | 3.16328300  | -2.43593800 | -2.93113500 |
| C | 3.77533700  | 0.99590300  | -4.20457100 |
| H | 2.26446900  | 2.41406700  | -4.86143100 |
| H | 5.01248800  | -0.59555600 | -3.49478700 |
| H | 4.18566100  | -2.74164200 | -2.72240500 |
| H | 4.60494500  | 1.66530500  | -4.41049300 |
| C | -4.47584500 | -0.18918200 | 2.68928200  |
| C | -3.80551400 | -0.66984700 | 3.83988300  |
| C | -5.01465500 | 1.12288400  | 2.67090900  |
| C | -3.21309200 | -1.97187300 | 3.90370100  |
| C | -3.68956300 | 0.17903300  | 5.00479400  |
| C | -4.87433200 | 1.96624100  | 3.83713700  |
| C | -2.57757000 | -2.40810200 | 5.03628200  |
| H | -3.24022200 | -2.60275500 | 3.02411600  |
| C | -3.02761500 | -0.32031000 | 6.17004600  |
| C | -4.22540700 | 1.46910700  | 4.97103600  |
| C | -2.49093900 | -1.57859300 | 6.19030800  |
| H | -2.11498900 | -3.39036200 | 5.04811700  |
| H | -2.95642800 | 0.32909800  | 7.03945400  |
| H | -4.13783200 | 2.10259800  | 5.85172600  |
| H | -1.98419900 | -1.94515200 | 7.07877700  |
| C | 0.04907100  | -5.21315200 | -2.40699200 |
| H | -0.74364900 | -5.95048900 | -2.31173400 |
| C | -0.25210400 | -3.94444500 | -2.82763100 |
| H | -1.27790400 | -3.69712900 | -3.07393100 |
| C | 1.38668400  | -5.57926700 | -2.08921600 |
| H | 1.60239300  | -6.58395500 | -1.73661800 |
| C | 2.39484500  | -4.66753100 | -2.24131400 |
| H | 3.42259800  | -4.92825800 | -2.00775500 |
| C | -6.23588200 | 2.93288100  | 1.56864600  |
| H | -6.77231500 | 3.31152600  | 0.70254700  |
| C | -6.07811700 | 3.76455300  | 2.71337200  |
| H | -6.48986600 | 4.77022300  | 2.71070500  |
| C | -5.41870800 | 3.28855900  | 3.81417900  |
| H | -5.29966300 | 3.90771300  | 4.70043100  |

|   |             |            |             |
|---|-------------|------------|-------------|
| C | -5.72654300 | 1.66046100 | 1.55003300  |
| H | -5.86799600 | 1.04072300 | 0.67199100  |
| C | -0.86412700 | 4.10720000 | -1.49713100 |
| C | -1.96233100 | 4.86562500 | -1.04744800 |
| C | -1.11984300 | 3.12365600 | -2.45868900 |
| C | -3.25012500 | 4.64837900 | -1.53078000 |
| H | -1.81669600 | 5.64585700 | -0.30452600 |
| C | -2.40882700 | 2.90291400 | -2.95329000 |
| H | -0.31891800 | 2.49510600 | -2.82749400 |
| C | -3.47983800 | 3.66415100 | -2.49467700 |
| H | -4.07314600 | 5.25000500 | -1.15429200 |
| H | -2.56679700 | 2.12380700 | -3.69364800 |
| H | -4.48244500 | 3.49415800 | -2.87796000 |
| C | 2.12272200  | 6.63276800 | -1.17882100 |
| C | 2.07823800  | 7.50758000 | -0.15838400 |
| H | 1.12199000  | 7.63616300 | 0.35289400  |
| C | 3.36539200  | 6.40560200 | -2.01714100 |
| H | 3.97058400  | 5.56502900 | -1.65407200 |
| H | 3.09493400  | 6.18238500 | -3.05610200 |
| H | 4.01347900  | 7.28655500 | -2.03080200 |
| C | 1.46413000  | 2.82191700 | 2.30914500  |
| H | 1.43858200  | 1.74766600 | 2.51112200  |
| H | 2.45568300  | 3.11230000 | 1.95610800  |
| H | 1.29419100  | 3.32233200 | 3.27669500  |
| C | -1.30062400 | 1.82153500 | 2.63818900  |
| H | -0.59069100 | 1.03562300 | 2.90462700  |
| H | -1.43363800 | 2.47236500 | 3.51154000  |
| H | -2.25696800 | 1.33955600 | 2.43866400  |
| C | 3.19204600  | 8.35285000 | 0.39129300  |
| H | 3.38739800  | 8.10013400 | 1.44258900  |
| H | 4.13165400  | 8.23099700 | -0.15289100 |
| H | 2.92206500  | 9.41763000 | 0.37284000  |

TS-1-2-6RR-3

l imaginary frequency

H = -5393.909016

G = -5394.115606

E(M06-2X-DCM) = -5394.843883

|   |             |             |             |
|---|-------------|-------------|-------------|
| O | -1.62420300 | -1.47539500 | -1.45091600 |
| O | -3.24626700 | -0.01004700 | -0.02289300 |
| P | -1.70065700 | -0.48731600 | -0.16376700 |
| O | -0.89998000 | 0.80533400  | -0.40875400 |
| N | -1.34540300 | -1.37365100 | 1.11732000  |
| S | 0.16338600  | -1.77803000 | 1.45472500  |

|   |             |             |             |
|---|-------------|-------------|-------------|
| C | 0.06193100  | -3.64073500 | 1.54532500  |
| F | -0.40389500 | -4.13379700 | 0.39733100  |
| F | -0.75123700 | -4.01574400 | 2.54138000  |
| F | 1.28390400  | -4.12743900 | 1.77363300  |
| C | 0.62298200  | 4.50296000  | -0.72675200 |
| C | 0.70437900  | 4.46016200  | 0.83328300  |
| H | 0.02392300  | 5.22328000  | 1.23408100  |
| H | 1.71965500  | 4.76297100  | 1.10115300  |
| C | 0.38309200  | 3.17942000  | 1.57385500  |
| C | 1.73535700  | 3.57718700  | -1.28721300 |
| H | 1.59857300  | 3.42529600  | -2.36221900 |
| H | 2.68484800  | 4.09495500  | -1.15842200 |
| N | 1.91355100  | 2.28740800  | -0.62485300 |
| C | 3.14871800  | 1.84718300  | -0.19293900 |
| N | 3.13923100  | 0.54695300  | 0.22860500  |
| C | 4.20902900  | -0.24412400 | 0.71620800  |
| C | 5.22120600  | 0.24055100  | 1.55643200  |
| C | 4.19560300  | -1.60309200 | 0.38057000  |
| C | 6.21532200  | -0.62478100 | 2.01183400  |
| C | 5.19403500  | -2.45554400 | 0.85130300  |
| H | 3.39544800  | -1.99397200 | -0.23534100 |
| C | 6.21966600  | -1.97581600 | 1.66151000  |
| H | 7.00053900  | -2.63664600 | 2.01675800  |
| C | 5.15990500  | -3.89649500 | 0.42219400  |
| C | 7.26188400  | -0.10896300 | 2.96449300  |
| F | 5.46884900  | -4.03036100 | -0.90031700 |
| F | 6.03765800  | -4.65975600 | 1.10404800  |
| F | 3.93406500  | -4.44016000 | 0.57974500  |
| F | 8.43432700  | -0.76922600 | 2.82453500  |
| F | 7.51106000  | 1.20483200  | 2.78464700  |
| F | 6.87978300  | -0.26387300 | 4.25495300  |
| S | 4.51254900  | 2.84373700  | -0.14902200 |
| C | 0.96650100  | 5.96571000  | -1.24114800 |
| H | 0.09100900  | 6.59534100  | -1.04968500 |
| H | 1.03566200  | 5.88044300  | -2.33295600 |
| H | 5.23929900  | 1.28194400  | 1.84047200  |
| C | -0.88288700 | 2.59567300  | 1.56125900  |
| H | 2.28010000  | 0.00371700  | 0.11002500  |
| H | -1.66612700 | 3.20307000  | 1.10397000  |
| O | 1.10190600  | -1.52095100 | 0.33192300  |
| H | 1.20453200  | 1.57879100  | -0.80416900 |
| O | 0.57497300  | -1.33722900 | 2.79222100  |
| H | -0.79781800 | 1.70369400  | 0.54561100  |
| C | -6.18886600 | -2.95320300 | 0.53037200  |



|   |             |             |             |
|---|-------------|-------------|-------------|
| C | -5.69037100 | -2.67886800 | -0.73715600 |
| C | -4.76604200 | -1.64014700 | -0.93988800 |
| C | -4.82034400 | -1.14484100 | 1.45041400  |
| C | -5.77885000 | -2.16129100 | 1.60018100  |
| C | -1.94581600 | -1.09847100 | -2.75859400 |
| C | -3.28432600 | -0.92720400 | -3.10301600 |
| C | -3.60409300 | -0.37310100 | -4.35260100 |
| C | -2.61036800 | -0.15940600 | -5.30280500 |
| C | -1.29736800 | -0.52326400 | -5.00035200 |
| C | -0.92294500 | -0.98462200 | -3.72486200 |
| H | -6.19725900 | -2.32640300 | 2.58843800  |
| H | -0.53039900 | -0.44751000 | -5.76476900 |
| C | -4.56390600 | -1.42152500 | -2.43650000 |
| C | -4.89767600 | -2.85904400 | -2.97113600 |
| H | -4.00517900 | -3.48649900 | -2.86524400 |
| H | -5.17858200 | -2.85637900 | -4.02829400 |
| H | -5.55849900 | -0.82913900 | -5.17919300 |
| H | -5.33313100 | 0.87541400  | -4.81262200 |
| C | -4.27627600 | -0.94658800 | 0.16630100  |
| H | -6.90282700 | -3.75788200 | 0.68584000  |
| H | -2.85314100 | 0.24079700  | -6.28403200 |
| C | -6.00860800 | -3.37798700 | -2.03874500 |
| H | -6.00483200 | -4.46948300 | -1.94131200 |
| H | -7.00568100 | -3.09778700 | -2.40671800 |
| C | -5.09624400 | -0.13624400 | -4.46303000 |
| C | -5.59133000 | -0.39747600 | -3.02158700 |
| H | -5.54015300 | 0.52693200  | -2.43455100 |
| H | -6.62077300 | -0.76579400 | -2.97727400 |
| C | 0.48375500  | -1.42157000 | -3.46772700 |
| C | 1.56740600  | -0.52668400 | -3.66457800 |
| C | 0.73738800  | -2.77210700 | -3.10734800 |
| C | 1.40310300  | 0.82868900  | -4.10215700 |
| C | 2.92081000  | -0.98249500 | -3.43308900 |
| C | 2.09261000  | -3.20044200 | -2.84737300 |
| C | 2.48059400  | 1.64917300  | -4.32322200 |
| H | 0.40311300  | 1.20388600  | -4.28361300 |
| C | 4.01360600  | -0.08475600 | -3.64571200 |
| C | 3.14437200  | -2.29481000 | -3.00902300 |
| C | 3.80791400  | 1.19391000  | -4.08676300 |
| H | 2.31990400  | 2.66286300  | -4.68158800 |
| H | 5.01947400  | -0.44761000 | -3.45047300 |
| H | 4.16088100  | -2.62292800 | -2.80574000 |
| H | 4.64703500  | 1.86405300  | -4.24661400 |
| C | -4.53206600 | -0.28778700 | 2.64418500  |

|   |             |             |             |
|---|-------------|-------------|-------------|
| C | -3.87216700 | -0.83323800 | 3.77155100  |
| C | -5.06885000 | 1.02427900  | 2.69466500  |
| C | -3.28454300 | -2.13896600 | 3.76830700  |
| C | -3.76343600 | -0.05034500 | 4.98252500  |
| C | -4.93612600 | 1.80139300  | 3.90690500  |
| C | -2.65995200 | -2.63927200 | 4.88030000  |
| H | -3.30664900 | -2.72038000 | 2.85510000  |
| C | -3.11234800 | -0.61535700 | 6.12365900  |
| C | -4.29628400 | 1.24096600  | 5.01616700  |
| C | -2.57990400 | -1.87478700 | 6.07884600  |
| H | -2.20099300 | -3.62252300 | 4.84193800  |
| H | -3.04633200 | -0.01512100 | 7.02811000  |
| H | -4.21431600 | 1.82446200  | 5.93127300  |
| H | -2.08165600 | -2.29159900 | 6.94979400  |
| C | -0.00501600 | -5.06128600 | -2.67148600 |
| H | -0.80661000 | -5.79372700 | -2.62526800 |
| C | -0.28769200 | -3.76839500 | -3.02617800 |
| H | -1.30780300 | -3.49676200 | -3.27041000 |
| C | 1.32481400  | -5.45907500 | -2.35925700 |
| H | 1.52575200  | -6.48375500 | -2.05939300 |
| C | 2.34431100  | -4.55186200 | -2.45073700 |
| H | 3.36645400  | -4.83646700 | -2.22064500 |
| C | -6.27977300 | 2.89465600  | 1.68576000  |
| H | -6.80909400 | 3.32184100  | 0.83806300  |
| C | -6.12967800 | 3.66112700  | 2.87611300  |
| H | -6.54032600 | 4.66599600  | 2.92633200  |
| C | -5.47880600 | 3.12376500  | 3.95350400  |
| H | -5.36557400 | 3.69250600  | 4.87365600  |
| C | -5.77156500 | 1.62454700  | 1.60008600  |
| H | -5.90681900 | 1.05492500  | 0.68778300  |
| C | -0.79739800 | 4.21983800  | -1.25675100 |
| C | -1.88212400 | 4.98388000  | -0.78416800 |
| C | -1.06472400 | 3.28505100  | -2.26217800 |
| C | -3.16987100 | 4.81623000  | -1.28651100 |
| H | -1.72383800 | 5.72910700  | -0.00825700 |
| C | -2.35386900 | 3.11497200  | -2.77659600 |
| H | -0.27380200 | 2.65580600  | -2.65091300 |
| C | -3.41199800 | 3.87902600  | -2.29370900 |
| H | -3.98309900 | 5.41963300  | -0.89197600 |
| H | -2.52220400 | 2.37220600  | -3.55127700 |
| H | -4.41463200 | 3.74773200  | -2.69180400 |
| C | 2.20177100  | 6.68019100  | -0.71090300 |
| C | 3.37149000  | 6.57972600  | -1.36500500 |
| H | 3.38712000  | 5.96156800  | -2.26369600 |

|   |             |            |             |
|---|-------------|------------|-------------|
| C | 1.98782500  | 7.56841900 | 0.49576700  |
| H | 1.22941500  | 8.33250100 | 0.27334800  |
| H | 1.61954000  | 7.01223200 | 1.36608500  |
| H | 2.89727600  | 8.08811300 | 0.80424300  |
| C | 1.43867300  | 2.65977000 | 2.50064200  |
| H | 1.38524700  | 1.57592300 | 2.63554300  |
| H | 2.44473200  | 2.94762200 | 2.18903700  |
| H | 1.25540400  | 3.10317800 | 3.49325300  |
| C | -1.35612700 | 1.71852800 | 2.71844900  |
| H | -0.67338200 | 0.89979500 | 2.95529500  |
| H | -1.48872700 | 2.32567500 | 3.62278000  |
| H | -2.32138000 | 1.27600700 | 2.47498400  |
| C | 4.70001400  | 7.19392300 | -1.03068100 |
| H | 5.06598200  | 7.80764200 | -1.86501000 |
| H | 4.67912800  | 7.82182700 | -0.13650800 |
| H | 5.44622100  | 6.40510200 | -0.86843000 |

INT-16

0 imaginary frequency

H = -5472.521040

G = -5472.736862

E(M06-2X-DCM) = -5473.496169

|   |             |             |             |
|---|-------------|-------------|-------------|
| C | 4.17567300  | -2.43512400 | 0.92343500  |
| C | 4.68492900  | -1.52559600 | 2.10644400  |
| H | 3.85686600  | -0.87221100 | 2.38764800  |
| H | 4.85472100  | -2.18574900 | 2.96772100  |
| C | 5.95170000  | -0.70144900 | 1.92116200  |
| C | 4.13667200  | -1.62673300 | -0.39597300 |
| H | 3.97928900  | -2.29714800 | -1.24841900 |
| H | 5.10197700  | -1.14274400 | -0.54691800 |
| N | 3.12737200  | -0.57266200 | -0.40512200 |
| C | 3.20613500  | 0.54835100  | -1.16502100 |
| N | 2.05127600  | 1.30624400  | -1.09976200 |
| C | 1.81174500  | 2.61041400  | -1.54990100 |
| C | 2.80321500  | 3.60332700  | -1.62060100 |
| C | 0.48914100  | 2.95352700  | -1.86934000 |
| C | 2.46694700  | 4.89300200  | -2.02429200 |
| C | 0.17292700  | 4.25136900  | -2.26980100 |
| H | -0.29146100 | 2.20382600  | -1.79711500 |
| C | 1.15678100  | 5.23337400  | -2.36311700 |
| H | 0.91140600  | 6.23658100  | -2.68971500 |
| C | -1.26020100 | 4.61662900  | -2.52736500 |
| C | 3.51679700  | 5.97208700  | -1.99731400 |
| F | -1.38349600 | 5.64981900  | -3.38474200 |

|   |             |             |             |
|---|-------------|-------------|-------------|
| F | -1.89591800 | 4.98980000  | -1.37902700 |
| F | -1.97133100 | 3.58149300  | -3.03355800 |
| F | 4.76071100  | 5.48635600  | -2.16839800 |
| F | 3.51148300  | 6.63101700  | -0.80685100 |
| F | 3.30406300  | 6.90491400  | -2.95198600 |
| S | 4.55606900  | 0.93926800  | -2.10198900 |
| H | 3.82527800  | 3.36326800  | -1.36751700 |
| C | 5.94892100  | 0.64569000  | 1.80898600  |
| H | 1.22020600  | 0.81534000  | -0.76583600 |
| H | 2.22367700  | -0.80435900 | -0.00174800 |
| H | -0.79620400 | -1.81606000 | 1.96982700  |
| O | -1.81048100 | 1.19933400  | 0.69759600  |
| O | -2.82290600 | -0.87316000 | -0.46284100 |
| P | -1.53559000 | -0.34677700 | 0.34918200  |
| O | -0.18684200 | -0.46637900 | -0.25454000 |
| C | -4.98736200 | 2.22260000  | 3.21985600  |
| C | -5.23068200 | 1.88494700  | 1.89356300  |
| C | -4.16723000 | 1.66338200  | 1.00329100  |
| C | -2.58250200 | 2.01106000  | 2.83782800  |
| C | -3.66966000 | 2.32924900  | 3.66686300  |
| C | -3.23176900 | -0.24785500 | -1.66240200 |
| C | -4.02436700 | 0.89476900  | -1.59359200 |
| C | -4.34524100 | 1.55400700  | -2.79323800 |
| C | -3.95555300 | 1.03554600  | -4.02263100 |
| C | -3.22764400 | -0.15258600 | -4.06178000 |
| C | -2.83603300 | -0.81510800 | -2.88818500 |
| H | -3.46651200 | 2.63248700  | 4.68951600  |
| H | -2.92984400 | -0.57783400 | -5.01556600 |
| C | -4.71270900 | 1.59241300  | -0.42122100 |
| C | -6.13413400 | 1.00587100  | -0.13492000 |
| H | -6.83477200 | 1.19022900  | -0.95522500 |
| H | -6.04815500 | -0.07813100 | 0.00235700  |
| H | -4.72290400 | 3.66913500  | -3.11932300 |
| H | -6.16580900 | 2.72551400  | -2.74431600 |
| C | -2.87577200 | 1.63058000  | 1.51509500  |
| H | -5.81071600 | 2.40761500  | 3.90488700  |
| H | -4.20886900 | 1.55120900  | -4.94509200 |
| C | -6.55720400 | 1.66899900  | 1.19624300  |
| H | -7.08433000 | 2.61728800  | 1.02410000  |
| H | -7.23092700 | 1.03589100  | 1.78412200  |
| C | -5.09637900 | 2.83507400  | -2.51664800 |
| C | -4.85306700 | 3.04045300  | -1.00898900 |
| H | -5.64288500 | 3.61245700  | -0.51403900 |
| H | -3.91086300 | 3.57719600  | -0.86469800 |

|   |             |             |             |
|---|-------------|-------------|-------------|
| C | -2.05240300 | -2.08794900 | -2.99118300 |
| C | -2.71280600 | -3.32715100 | -2.81205500 |
| C | -0.68302400 | -2.05026700 | -3.34489400 |
| C | -4.11402300 | -3.42706100 | -2.53579900 |
| C | -1.96562300 | -4.55768900 | -2.93976100 |
| C | 0.05076100  | -3.28939400 | -3.47859700 |
| C | -4.72472400 | -4.64356500 | -2.37386900 |
| H | -4.69893300 | -2.51698700 | -2.46057900 |
| C | -2.63848300 | -5.80547600 | -2.75139200 |
| C | -0.60574000 | -4.50430100 | -3.26181700 |
| C | -3.97833300 | -5.85203900 | -2.47464600 |
| H | -5.79114500 | -4.68951300 | -2.16975900 |
| H | -2.05901800 | -6.72111400 | -2.84343000 |
| H | -0.04835600 | -5.43348100 | -3.36393800 |
| H | -4.47880400 | -6.80697400 | -2.33990400 |
| C | -1.17949300 | 2.11231900  | 3.34975900  |
| C | -0.31640500 | 3.11008500  | 2.82893500  |
| C | -0.73273200 | 1.25134600  | 4.38290600  |
| C | -0.72000800 | 4.04347300  | 1.82138300  |
| C | 1.03298500  | 3.22153800  | 3.33547200  |
| C | 0.61590300  | 1.38513400  | 4.88868600  |
| C | 0.14595600  | 4.98585500  | 1.33156800  |
| H | -1.73339100 | 4.00447900  | 1.43886900  |
| C | 1.90735900  | 4.21383300  | 2.79038200  |
| C | 1.45994500  | 2.35871700  | 4.34875500  |
| C | 1.48435700  | 5.06897100  | 1.80906400  |
| H | -0.19223800 | 5.66979400  | 0.56001800  |
| H | 2.92310000  | 4.26890100  | 3.17437800  |
| H | 2.47570600  | 2.44926400  | 4.72823600  |
| H | 2.16285600  | 5.80022200  | 1.37989900  |
| C | 1.35158900  | -0.82914300 | -3.93249800 |
| H | 1.87228900  | 0.10859600  | -4.10096100 |
| C | 0.02611900  | -0.82898600 | -3.58523000 |
| H | -0.50544800 | 0.11149600  | -3.49244900 |
| C | 2.07028800  | -2.05285600 | -4.05831300 |
| H | 3.12196000  | -2.02628500 | -4.32840400 |
| C | 1.43554300  | -3.24560500 | -3.83700500 |
| H | 1.97080000  | -4.18733700 | -3.93608200 |
| C | -1.08399600 | -0.59781800 | 5.94486100  |
| H | -1.72783700 | -1.37608600 | 6.34402800  |
| C | 0.24021100  | -0.45208500 | 6.44701500  |
| H | 0.59249500  | -1.10948700 | 7.23729400  |
| C | 1.06283600  | 0.51158100  | 5.92930500  |
| H | 2.07825600  | 0.63285200  | 6.29946900  |

|   |             |             |             |
|---|-------------|-------------|-------------|
| C | -1.55273200 | 0.22377700  | 4.95260500  |
| H | -2.56351900 | 0.09408800  | 4.58443800  |
| N | -1.67040400 | -1.35080500 | 1.71249800  |
| S | -2.99299900 | -2.08943600 | 2.45841300  |
| C | -3.62915400 | -3.37796200 | 1.22121500  |
| O | -4.07610000 | -1.13233300 | 2.61837700  |
| O | -2.43089100 | -2.85591500 | 3.56298600  |
| F | -4.09636000 | -4.40339500 | 1.93179700  |
| F | -4.61062500 | -2.86092300 | 0.49247200  |
| F | -2.63771500 | -3.79677200 | 0.43605600  |
| C | 2.78427500  | -3.00815500 | 1.27125000  |
| C | 2.35351300  | -3.17280600 | 2.59948700  |
| C | 1.90603900  | -3.43338500 | 0.25678700  |
| C | 1.11878200  | -3.75175600 | 2.90236300  |
| H | 2.98075500  | -2.85239000 | 3.42276600  |
| C | 0.67331300  | -4.01592600 | 0.55230100  |
| H | 2.18192700  | -3.32111200 | -0.78590700 |
| C | 0.27479100  | -4.18797900 | 1.87945400  |
| H | 0.81747100  | -3.86184400 | 3.94051600  |
| H | 0.02485900  | -4.33036500 | -0.26042900 |
| H | -0.67826600 | -4.65025500 | 2.11682700  |
| C | 5.19906800  | -3.62159100 | 0.71534200  |
| H | 6.14366700  | -3.17402000 | 0.40355300  |
| H | 5.38064800  | -4.05246300 | 1.70853700  |
| C | 4.83420400  | -4.76400500 | -0.22186100 |
| C | 5.26447200  | -4.84565900 | -1.50040500 |
| C | 7.21385300  | 1.45724700  | 1.62582800  |
| H | 7.12578500  | 2.07893400  | 0.72486000  |
| H | 7.36155000  | 2.14922500  | 2.46790600  |
| H | 8.11810000  | 0.85663000  | 1.51934500  |
| C | 4.94783900  | -6.02772500 | -2.39108500 |
| H | 5.86705800  | -6.57377700 | -2.64897700 |
| H | 4.25334700  | -6.74123800 | -1.94463800 |
| H | 4.51796900  | -5.68987400 | -3.34500900 |
| C | 4.04600800  | -5.90129000 | 0.41950800  |
| H | 4.65935900  | -6.80868700 | 0.50545000  |
| H | 3.71816100  | -5.63486300 | 1.42683400  |
| H | 3.14596300  | -6.16919200 | -0.14349300 |
| C | 7.26422300  | -1.47544500 | 1.98322500  |
| H | 7.11965300  | -2.45318600 | 2.45225800  |
| H | 7.70381800  | -1.65798700 | 0.99304400  |
| H | 8.02118800  | -0.94966300 | 2.57316900  |
| C | 4.72850000  | 1.53517900  | 1.85589900  |
| H | 3.78781000  | 1.01536800  | 2.03734200  |

|   |            |             |             |
|---|------------|-------------|-------------|
| H | 4.85299700 | 2.29050800  | 2.64564100  |
| H | 4.62422300 | 2.08724300  | 0.91360400  |
| C | 6.12736000 | -3.82061100 | -2.20232500 |
| H | 6.48837100 | -3.01830400 | -1.55757600 |
| H | 7.00388800 | -4.30916600 | -2.65055100 |
| H | 5.58229500 | -3.34786000 | -3.03153000 |

INT-16'

0 imaginary frequency

H = -5472.493650

G = -5472.711885

E(M06-2X-DCM) = -5473.483783

|   |             |             |             |
|---|-------------|-------------|-------------|
| O | -0.74907300 | -2.68967600 | -0.87803900 |
| O | -2.71121700 | -1.10400000 | -0.24307000 |
| P | -1.08111400 | -1.25516300 | -0.13938100 |
| O | -0.44503500 | -0.10126200 | -0.85479000 |
| C | -1.61451400 | -2.94473200 | -4.96851000 |
| C | -2.60701100 | -3.14545500 | -4.01437800 |
| C | -2.28889700 | -3.14477600 | -2.64936400 |
| C | 0.04142900  | -2.66956200 | -3.18033000 |
| C | -0.30077100 | -2.75015400 | -4.54323900 |
| C | -3.54349900 | -2.08067000 | 0.31302900  |
| C | -3.76697700 | -3.26810800 | -0.38982800 |
| C | -4.46104400 | -4.31826700 | 0.23291300  |
| C | -5.01698900 | -4.15590000 | 1.49576000  |
| C | -4.90073700 | -2.91813600 | 2.12359300  |
| C | -4.17078300 | -1.85910100 | 1.55771400  |
| H | 0.49153600  | -2.64221200 | -5.27803400 |
| H | -5.37453900 | -2.75339400 | 3.08687400  |
| C | -3.47666100 | -3.64533500 | -1.84072700 |
| C | -4.65162200 | -3.22288600 | -2.78567800 |
| H | -4.88220700 | -2.16677400 | -2.60409000 |
| H | -5.56335100 | -3.80092800 | -2.60534300 |
| H | -5.47906200 | -5.69776400 | -1.09386600 |
| H | -4.24650000 | -6.46362900 | -0.09705100 |
| C | -0.99662000 | -2.82372800 | -2.24025900 |
| H | -1.84800400 | -2.96153400 | -6.03035800 |
| H | -5.55152400 | -4.96941300 | 1.97972700  |
| C | -4.08669700 | -3.39604900 | -4.21357600 |
| H | -4.53800400 | -2.70368500 | -4.93427700 |
| H | -4.27073300 | -4.40925700 | -4.59750600 |
| C | -4.48531400 | -5.54705200 | -0.64861600 |
| C | -3.43293900 | -5.20664300 | -1.72229600 |
| H | -2.43782100 | -5.50245300 | -1.37080200 |

|   |             |             |             |
|---|-------------|-------------|-------------|
| H | -3.60944800 | -5.70351200 | -2.68143200 |
| C | -4.20992600 | -0.54581800 | 2.28095700  |
| C | -3.53436200 | -0.38347700 | 3.51374800  |
| C | -5.08097500 | 0.46814900  | 1.80934500  |
| C | -2.66100500 | -1.38180000 | 4.05076300  |
| C | -3.72198400 | 0.82927700  | 4.27911400  |
| C | -5.25038300 | 1.68108500  | 2.57848600  |
| C | -2.02498200 | -1.19908500 | 5.24979800  |
| H | -2.47609600 | -2.27770000 | 3.47336000  |
| C | -3.04327100 | 0.97717200  | 5.52909800  |
| C | -4.56733300 | 1.82821500  | 3.78930600  |
| C | -2.22059400 | -0.00778100 | 6.00428000  |
| H | -1.34255900 | -1.96036400 | 5.61486900  |
| H | -3.19670400 | 1.89479700  | 6.09251600  |
| H | -4.70739300 | 2.73771100  | 4.37064700  |
| H | -1.70501700 | 0.11826800  | 6.95260100  |
| C | 1.48017700  | -2.49183400 | -2.81389600 |
| C | 2.18679800  | -1.35235100 | -3.27454300 |
| C | 2.17167200  | -3.51865800 | -2.12120700 |
| C | 1.54168900  | -0.25165700 | -3.92731900 |
| C | 3.61747500  | -1.26932600 | -3.08751500 |
| C | 3.59232300  | -3.39022300 | -1.88697500 |
| C | 2.25726300  | 0.81288900  | -4.41373900 |
| H | 0.46222200  | -0.26362500 | -4.01537300 |
| C | 4.32967000  | -0.14836900 | -3.62366400 |
| C | 4.27931800  | -2.28153100 | -2.38808400 |
| C | 3.67424100  | 0.86234800  | -4.27603000 |
| H | 1.74059900  | 1.62637900  | -4.91804400 |
| H | 5.40939700  | -0.11957100 | -3.49799700 |
| H | 5.35105700  | -2.20145900 | -2.22339300 |
| H | 4.22936100  | 1.70193800  | -4.68644300 |
| C | -6.71173800 | 1.32133100  | 0.19603100  |
| H | -7.30093400 | 1.18153500  | -0.70697200 |
| C | -5.85732300 | 0.33260500  | 0.61305500  |
| H | -5.77229800 | -0.58235100 | 0.03759400  |
| C | -6.84749300 | 2.52827300  | 0.94020500  |
| H | -7.52555300 | 3.30325000  | 0.59266500  |
| C | -6.13606900 | 2.69652300  | 2.09760200  |
| H | -6.24115100 | 3.60557700  | 2.68570500  |
| C | 2.23200600  | -5.68037200 | -0.98178800 |
| H | 1.71779400  | -6.57309000 | -0.63636200 |
| C | 3.62388000  | -5.53119000 | -0.72509600 |
| H | 4.15801900  | -6.30543900 | -0.18117300 |
| C | 4.28230200  | -4.41911300 | -1.17309800 |



|   |             |             |             |
|---|-------------|-------------|-------------|
| H | 5.34843300  | -4.29590400 | -0.99826300 |
| C | 1.53520600  | -4.71465700 | -1.65908200 |
| H | 0.47883900  | -4.85619200 | -1.85108000 |
| C | -1.17283600 | 3.92476600  | -1.57188000 |
| C | -1.58057300 | 4.32425600  | -0.10789400 |
| H | -1.34866400 | 5.38490800  | -0.02283200 |
| H | -2.67190800 | 4.26342100  | -0.02701000 |
| C | -0.97338800 | 3.57956900  | 1.07449700  |
| C | 0.35767500  | 3.69314400  | -1.63203900 |
| H | 0.80679800  | 4.49958600  | -1.05194100 |
| H | 0.71655700  | 3.77785500  | -2.66394500 |
| N | 0.83605400  | 2.41386900  | -1.08222000 |
| C | 2.04540700  | 2.20661900  | -0.58462800 |
| N | 2.38757300  | 1.03972900  | -0.03331300 |
| C | 3.64742000  | 0.79190400  | 0.61375300  |
| C | 4.80852400  | 0.64812300  | -0.14315200 |
| C | 3.67889800  | 0.65743100  | 2.00421200  |
| C | 6.02137700  | 0.39770600  | 0.50291400  |
| C | 4.89533200  | 0.39485400  | 2.63289200  |
| H | 2.76212700  | 0.72419000  | 2.57980900  |
| C | 6.07047300  | 0.27083100  | 1.88960800  |
| H | 7.01177000  | 0.07328800  | 2.38767600  |
| C | 4.92608700  | 0.19420300  | 4.12827800  |
| C | 7.28114900  | 0.31096700  | -0.31692600 |
| F | 6.15362900  | 0.45615700  | 4.63553600  |
| F | 4.61928300  | -1.07367900 | 4.46526300  |
| F | 4.04676400  | 1.00282200  | 4.75318200  |
| F | 8.29038700  | -0.27127100 | 0.35909000  |
| F | 7.70778800  | 1.53494100  | -0.70270900 |
| F | 7.09017500  | -0.40444200 | -1.45539800 |
| S | 3.32972200  | 3.44151400  | -0.57593400 |
| H | 4.75893800  | 0.72322400  | -1.22291100 |
| H | 1.69650800  | 0.27731100  | 0.03046300  |
| H | 0.20101600  | 1.59367200  | -1.07503600 |
| C | -0.03567300 | 4.12845700  | 1.88171300  |
| H | 2.69305500  | 4.32157600  | -1.36625000 |
| N | -0.79269700 | -1.51432200 | 1.42725400  |
| S | 0.66931400  | -1.57127700 | 2.02863000  |
| O | 0.82397200  | -0.72738900 | 3.22468800  |
| O | 1.74826800  | -1.48063000 | 1.00986300  |
| C | 0.78867500  | -3.32308500 | 2.66460600  |
| F | -0.14681600 | -3.54730500 | 3.60149300  |
| F | 1.99358000  | -3.51861600 | 3.21075100  |
| F | 0.61449200  | -4.19451500 | 1.66779500  |

|   |             |            |             |
|---|-------------|------------|-------------|
| C | -1.95966200 | 2.76512300 | -2.21733900 |
| C | -3.25185600 | 2.40851900 | -1.80758400 |
| C | -1.45072900 | 2.13005000 | -3.36426000 |
| C | -3.99768000 | 1.45861800 | -2.50745600 |
| H | -3.70036500 | 2.85797000 | -0.92923600 |
| C | -2.19106100 | 1.18000000 | -4.06542300 |
| H | -0.45694100 | 2.37271300 | -3.72868700 |
| C | -3.47466400 | 0.84079400 | -3.64071500 |
| H | -4.98911900 | 1.20311300 | -2.14770300 |
| H | -1.76239000 | 0.70476600 | -4.94374300 |
| H | -4.05606000 | 0.10198000 | -4.18529000 |
| C | -1.50157500 | 5.16873500 | -2.51156000 |
| H | -1.26610400 | 4.85961000 | -3.53785400 |
| H | -2.58889400 | 5.26821300 | -2.48116100 |
| C | -0.83540900 | 6.51182000 | -2.25058800 |
| C | -1.44671000 | 7.53598500 | -1.61227500 |
| C | -1.60991000 | 2.23298200 | 1.33399400  |
| H | -1.04288100 | 1.58571700 | 2.00331100  |
| H | -2.60258000 | 2.37263900 | 1.78208500  |
| H | -1.76708700 | 1.67936700 | 0.40601700  |
| C | 0.56240300  | 6.67964200 | -2.83818000 |
| H | 0.76533700  | 5.91035200 | -3.59009300 |
| H | 0.68740400  | 7.64555700 | -3.33698200 |
| H | 1.35766300  | 6.61261500 | -2.08129800 |
| C | 0.51923600  | 3.44242500 | 3.11376300  |
| H | 0.20720400  | 2.40496300 | 3.23523400  |
| H | 1.61843200  | 3.46365200 | 3.10482100  |
| H | 0.21533300  | 3.98576700 | 4.02061500  |
| C | -0.78092500 | 8.87639900 | -1.38250600 |
| H | 0.28211700  | 8.89233300 | -1.62795500 |
| H | -1.27623200 | 9.66206100 | -1.97130600 |
| H | -0.88079800 | 9.17405700 | -0.33015700 |
| C | -2.85460100 | 7.50382100 | -1.06040500 |
| H | -3.41780600 | 6.60551100 | -1.31589500 |
| H | -2.84413600 | 7.58477000 | 0.03536100  |
| H | -3.42041000 | 8.37109000 | -1.42765800 |
| C | 0.56112400  | 5.51309300 | 1.71590100  |
| H | 0.21582000  | 6.06224400 | 0.83743400  |
| H | 0.33637300  | 6.13064100 | 2.59782400  |
| H | 1.65756300  | 5.45470900 | 1.66318500  |

INT-16' -1

0 imaginary frequency

H = -5472.493581

G = -5472.710711

E(M06-2X-DCM) = -5473.474167

|   |             |             |             |
|---|-------------|-------------|-------------|
| O | -1.56074900 | -2.27825500 | -1.06511400 |
| O | -3.21093700 | -0.48782400 | -0.15241500 |
| P | -1.62096000 | -0.88249300 | -0.19430400 |
| O | -0.87200900 | 0.22196800  | -0.87658900 |
| C | -3.03314500 | -2.26081500 | -4.98775500 |
| C | -3.88605300 | -2.43761900 | -3.90329400 |
| C | -3.37395200 | -2.50767900 | -2.60029900 |
| C | -1.12082400 | -2.14576100 | -3.45783300 |
| C | -1.66321400 | -2.14887200 | -4.75658900 |
| C | -4.10174700 | -1.35604600 | 0.49497300  |
| C | -4.52501900 | -2.51611000 | -0.15754200 |
| C | -5.23656400 | -3.48916400 | 0.56290500  |
| C | -5.62356200 | -3.25919000 | 1.87759400  |
| C | -5.32596100 | -2.02769500 | 2.45849900  |
| C | -4.56478400 | -1.05340600 | 1.79169500  |
| H | -0.98332600 | -2.04483400 | -5.59698800 |
| H | -5.67525100 | -1.80368200 | 3.46218900  |
| C | -4.46937900 | -2.92126700 | -1.62864800 |
| C | -5.73136900 | -2.39520000 | -2.39567200 |
| H | -5.85503500 | -1.32838000 | -2.17604900 |
| H | -6.64927700 | -2.90659900 | -2.09017900 |
| H | -6.52745800 | -4.78982200 | -0.59835400 |
| H | -5.24351100 | -5.64718900 | 0.24701700  |
| C | -2.01479100 | -2.29702200 | -2.37903800 |
| H | -3.42066700 | -2.22077200 | -6.00267000 |
| H | -6.17100500 | -4.01246000 | 2.43854100  |
| C | -5.39192400 | -2.58207700 | -3.89038200 |
| H | -5.89117900 | -1.84807700 | -4.53339900 |
| H | -5.69770800 | -3.57463400 | -4.25009800 |
| C | -5.47581700 | -4.71848400 | -0.28673300 |
| C | -4.54513200 | -4.47836300 | -1.49402100 |
| H | -3.54211600 | -4.85887800 | -1.26921000 |
| H | -4.88915200 | -4.96159800 | -2.41408300 |
| C | -4.40698200 | 0.27944100  | 2.46123000  |
| C | -3.57114300 | 0.43079500  | 3.59217500  |
| C | -5.25434400 | 1.34124400  | 2.05464300  |
| C | -2.73153300 | -0.62119400 | 4.07870700  |
| C | -3.55758400 | 1.68834100  | 4.30749000  |
| C | -5.25075600 | 2.58209400  | 2.79608900  |
| C | -1.93428200 | -0.44324800 | 5.17833200  |
| H | -2.70912900 | -1.56103400 | 3.54301600  |
| C | -2.70799500 | 1.83277600  | 5.44880000  |

|   |             |             |             |
|---|-------------|-------------|-------------|
| C | -4.39311300 | 2.72674300  | 3.88967900  |
| C | -1.91986600 | 0.79834400  | 5.87524700  |
| H | -1.28560600 | -1.25002100 | 5.50461500  |
| H | -2.70849700 | 2.78586900  | 5.97296600  |
| H | -4.39329300 | 3.66354800  | 4.44379800  |
| H | -1.27758300 | 0.91966900  | 6.74362900  |
| C | 0.36236600  | -2.02768500 | -3.30815600 |
| C | 1.02671400  | -0.88045200 | -3.81139800 |
| C | 1.11694200  | -3.10672900 | -2.78067800 |
| C | 0.32659700  | 0.26432800  | -4.31757400 |
| C | 2.47197300  | -0.83734200 | -3.82915500 |
| C | 2.56060000  | -3.02975000 | -2.76513000 |
| C | 0.99378200  | 1.33269300  | -4.86011800 |
| H | -0.75538300 | 0.27727000  | -4.26291100 |
| C | 3.13177900  | 0.29454300  | -4.40697300 |
| C | 3.19867600  | -1.90654700 | -3.30024900 |
| C | 2.41802200  | 1.34453400  | -4.92279600 |
| H | 0.43466200  | 2.18059600  | -5.24655600 |
| H | 4.21900800  | 0.28734200  | -4.44802100 |
| H | 4.28628500  | -1.87058700 | -3.31485400 |
| H | 2.93040300  | 2.18144200  | -5.39091000 |
| C | -7.02652300 | 2.25222000  | 0.63272400  |
| H | -7.72020900 | 2.13195000  | -0.19545600 |
| C | -6.17369700 | 1.22982800  | 0.96106700  |
| H | -6.20367300 | 0.30538000  | 0.39540700  |
| C | -7.02388200 | 3.46854400  | 1.37375800  |
| H | -7.71479400 | 4.26440800  | 1.10781400  |
| C | -6.15417800 | 3.62489700  | 2.41992700  |
| H | -6.14163800 | 4.54664800  | 2.99746300  |
| C | 1.27369100  | -5.32048400 | -1.75689000 |
| H | 0.78671800  | -6.21080700 | -1.36916900 |
| C | 2.69235600  | -5.22229000 | -1.71119500 |
| H | 3.27696400  | -6.02898600 | -1.27859900 |
| C | 3.31585100  | -4.11298400 | -2.21522000 |
| H | 4.39906300  | -4.02860400 | -2.19094000 |
| C | 0.51636000  | -4.30496300 | -2.27885100 |
| H | -0.56141400 | -4.40457900 | -2.30864100 |
| C | 0.64115500  | 4.26496200  | -0.74545100 |
| C | 1.43639000  | 4.41692600  | 0.60025800  |
| H | 2.48008800  | 4.56136700  | 0.30867800  |
| H | 1.12449800  | 5.38361600  | 1.02158400  |
| C | 1.38517900  | 3.37639900  | 1.72769400  |
| C | 1.19092200  | 3.09622000  | -1.62210300 |
| H | 2.12553400  | 3.43936600  | -2.05437600 |

|   |              |              |              |
|---|--------------|--------------|--------------|
| H | 0. 52397500  | 2. 89832000  | -2. 46117300 |
| N | 1. 45233900  | 1. 80188900  | -0. 96969300 |
| C | 2. 63144100  | 1. 32351400  | -0. 60987600 |
| N | 2. 73294600  | 0. 18871400  | 0. 08675500  |
| C | 3. 92114600  | -0. 33066800 | 0. 67792000  |
| C | 4. 69587900  | 0. 47260300  | 1. 51434600  |
| C | 4. 25765500  | -1. 67166900 | 0. 47718400  |
| C | 5. 84338200  | -0. 05056400 | 2. 10994400  |
| C | 5. 40502600  | -2. 18239200 | 1. 08479700  |
| H | 3. 62234500  | -2. 30350800 | -0. 13198700 |
| C | 6. 20825700  | -1. 37781800 | 1. 89528000  |
| H | 7. 09617300  | -1. 78438800 | 2. 36269600  |
| C | 5. 80112600  | -3. 61114900 | 0. 80713900  |
| C | 6. 63437700  | 0. 82887500  | 3. 04282200  |
| F | 6. 32371700  | -3. 73853000 | -0. 44047500 |
| F | 4. 74672300  | -4. 44633400 | 0. 87446100  |
| F | 6. 73578800  | -4. 05496000 | 1. 67197700  |
| F | 5. 99284900  | 1. 00503600  | 4. 22078600  |
| F | 6. 82028100  | 2. 06265600  | 2. 51512900  |
| F | 7. 84927400  | 0. 31587900  | 3. 31806000  |
| S | 4. 16770200  | 2. 13023300  | -1. 08074800 |
| H | 4. 38154200  | 1. 48751100  | 1. 72733500  |
| H | 1. 89580900  | -0. 40438100 | 0. 25706300  |
| H | 0. 62241900  | 1. 19632200  | -0. 80639700 |
| C | 2. 41998600  | 3. 25992000  | 2. 59578700  |
| H | 3. 77827700  | 2. 30063400  | -2. 36284600 |
| N | -1. 25899500 | -1. 31515600 | 1. 31759500  |
| S | 0. 13246700  | -1. 88218400 | 1. 78788800  |
| O | 0. 56025300  | -1. 34685400 | 3. 08460000  |
| O | 1. 16458600  | -1. 92120700 | 0. 70661800  |
| C | -0. 21471400 | -3. 68826000 | 2. 11459400  |
| F | 0. 90348100  | -4. 29474700 | 2. 52722700  |
| F | -0. 65513300 | -4. 29548800 | 1. 00834600  |
| F | -1. 14568200 | -3. 80358800 | 3. 07172200  |
| C | -0. 88413800 | 4. 24412800  | -0. 53745800 |
| C | -1. 49015900 | 5. 28802300  | 0. 18514100  |
| C | -1. 72408500 | 3. 26206000  | -1. 07620800 |
| C | -2. 87202600 | 5. 35613100  | 0. 34563400  |
| H | -0. 87943200 | 6. 06802300  | 0. 63170200  |
| C | -3. 11000100 | 3. 31995800  | -0. 90658500 |
| H | -1. 32251400 | 2. 40640400  | -1. 60348500 |
| C | -3. 69383800 | 4. 37177800  | -0. 20612100 |
| H | -3. 30631700 | 6. 17865700  | 0. 90860000  |
| H | -3. 72658900 | 2. 52189800  | -1. 30930400 |

|   |             |            |             |
|---|-------------|------------|-------------|
| H | -4.76906500 | 4.41145600 | -0.06894600 |
| C | 1.01868300  | 5.57697100 | -1.56413000 |
| H | 0.56422900  | 6.42044200 | -1.03189100 |
| H | 2.09872900  | 5.70672500 | -1.46199800 |
| C | 0.61729600  | 5.66843600 | -3.02984200 |
| C | 1.50931100  | 5.57792300 | -4.04367900 |
| C | 0.08621500  | 2.63318500 | 1.94839600  |
| H | -0.71400900 | 3.33938900 | 2.20545100  |
| H | -0.26697400 | 2.10442900 | 1.05940400  |
| H | 0.14652100  | 1.90558900 | 2.75760800  |
| C | -0.85693700 | 5.94549900 | -3.27371100 |
| H | -1.03847300 | 6.45854500 | -4.22053500 |
| H | -1.46030500 | 5.02984600 | -3.26494800 |
| H | -1.26151700 | 6.57699700 | -2.47618100 |
| C | 2.41045300  | 2.30526600 | 3.78051100  |
| H | 1.94665500  | 2.77033200 | 4.66249400  |
| H | 1.87985900  | 1.36915800 | 3.58940200  |
| H | 3.43565400  | 2.04576600 | 4.07066800  |
| C | 1.12499400  | 5.66997000 | -5.50680300 |
| H | 0.05088800  | 5.62410100 | -5.68918700 |
| H | 1.50565600  | 6.59962000 | -5.95471300 |
| H | 1.58797600  | 4.84919900 | -6.07232400 |
| C | 3.65331600  | 4.14431900 | 2.59538000  |
| H | 3.69885600  | 4.86967200 | 1.78172600  |
| H | 3.68718900  | 4.71403300 | 3.53584400  |
| H | 4.58220500  | 3.55802000 | 2.57504400  |
| C | 3.00405900  | 5.38915300 | -3.88557000 |
| H | 3.31723500  | 4.40760500 | -4.27210500 |
| H | 3.54198200  | 6.13453600 | -4.48755000 |
| H | 3.36986800  | 5.47492800 | -2.86074900 |

INT-16<sup>7</sup>-10

0 imaginary frequency

H = -5472.493185

G = -5472.711645

E(M06-2X-DCM) = -5473.480903

|   |             |             |             |
|---|-------------|-------------|-------------|
| O | -1.55971900 | -2.43567400 | -0.81142000 |
| O | -2.96078800 | -0.41147400 | 0.02689700  |
| P | -1.42968500 | -0.99015700 | -0.02809700 |
| O | -0.58086600 | -0.02685800 | -0.80188200 |
| C | -2.96720000 | -2.42467100 | -4.75945000 |
| C | -3.84944800 | -2.37703300 | -3.68477900 |
| C | -3.37242200 | -2.46508900 | -2.36898800 |
| C | -1.08133800 | -2.56103700 | -3.19727300 |

|   |              |              |              |
|---|--------------|--------------|--------------|
| C | -1. 60245200 | -2. 55561100 | -4. 50462900 |
| C | -3. 95048700 | -1. 13918700 | 0. 69672300  |
| C | -4. 54934800 | -2. 22589800 | 0. 05465500  |
| C | -5. 41076400 | -3. 06545800 | 0. 77927200  |
| C | -5. 75738100 | -2. 76846700 | 2. 09160300  |
| C | -5. 25705500 | -1. 60368900 | 2. 66918300  |
| C | -4. 34929600 | -0. 76745200 | 1. 99763900  |
| H | -0. 90732000 | -2. 63905800 | -5. 33477400 |
| H | -5. 55816500 | -1. 32590900 | 3. 67499600  |
| C | -4. 53935600 | -2. 65632600 | -1. 40996000 |
| C | -5. 67733200 | -1. 94351100 | -2. 21598800 |
| H | -5. 60814900 | -0. 86413200 | -2. 03686500 |
| H | -6. 67565500 | -2. 27075500 | -1. 90955400 |
| H | -6. 89197000 | -4. 13897500 | -0. 38546900 |
| H | -5. 78235000 | -5. 19425600 | 0. 48303100  |
| C | -1. 99939900 | -2. 47449300 | -2. 12925100 |
| H | -3. 33016300 | -2. 38121100 | -5. 78339600 |
| H | -6. 42239300 | -3. 41865300 | 2. 65446800  |
| C | -5. 35756300 | -2. 24867800 | -3. 69605100 |
| H | -5. 70768900 | -1. 46369700 | -4. 37653700 |
| H | -5. 83356000 | -3. 18306100 | -4. 02498600 |
| C | -5. 84695400 | -4. 24504300 | -0. 06120700 |
| C | -4. 87675100 | -4. 17819600 | -1. 25783700 |
| H | -3. 95388200 | -4. 71780900 | -1. 01606400 |
| H | -5. 28520100 | -4. 61004000 | -2. 17692500 |
| C | -3. 95505800 | 0. 50668500  | 2. 68245600  |
| C | -3. 12709100 | 0. 47909100  | 3. 82967500  |
| C | -4. 56781000 | 1. 71873500  | 2. 27594300  |
| C | -2. 50557600 | -0. 71954400 | 4. 30440900  |
| C | -2. 88971500 | 1. 69887700  | 4. 57021400  |
| C | -4. 31968900 | 2. 93099000  | 3. 02431300  |
| C | -1. 71483700 | -0. 71584100 | 5. 42245900  |
| H | -2. 63753100 | -1. 63385800 | 3. 74122300  |
| C | -2. 05919300 | 1. 65783300  | 5. 73416800  |
| C | -3. 48593300 | 2. 88861500  | 4. 14522700  |
| C | -1. 48995700 | 0. 48562100  | 6. 15224100  |
| H | -1. 23074100 | -1. 63501600 | 5. 73785400  |
| H | -1. 89333600 | 2. 58364200  | 6. 28064700  |
| H | -3. 30969700 | 3. 80220400  | 4. 71015200  |
| H | -0. 85681500 | 0. 46756400  | 7. 03535500  |
| C | 0. 39667100  | -2. 69769100 | -3. 01471100 |
| C | 1. 26825000  | -1. 73375000 | -3. 58528800 |
| C | 0. 93378700  | -3. 83882600 | -2. 36588900 |
| C | 0. 79983800  | -0. 55359100 | -4. 24995600 |

|   |             |             |             |
|---|-------------|-------------|-------------|
| C | 2.69910800  | -1.92746200 | -3.51355300 |
| C | 2.36748400  | -3.99881300 | -2.26776600 |
| C | 1.66519900  | 0.33634000  | -4.83508600 |
| H | -0.26678800 | -0.37169700 | -4.29277100 |
| C | 3.56920000  | -0.97240800 | -4.12864600 |
| C | 3.20974200  | -3.04778700 | -2.85207700 |
| C | 3.07281900  | 0.12418200  | -4.78163700 |
| H | 1.27201400  | 1.20755800  | -5.35386700 |
| H | 4.64131300  | -1.14633800 | -4.07354000 |
| H | 4.28707700  | -3.18352400 | -2.78828700 |
| H | 3.74597600  | 0.82871000  | -5.26379300 |
| C | -6.08889200 | 2.97792100  | 0.83225300  |
| H | -6.78887500 | 3.00201100  | 0.00080700  |
| C | -5.47955600 | 1.79850600  | 1.17444100  |
| H | -5.69826700 | 0.89843400  | 0.61131700  |
| C | -5.82172200 | 4.17342900  | 1.55814200  |
| H | -6.31228700 | 5.10031400  | 1.27213700  |
| C | -4.95909300 | 4.14521000  | 2.62085300  |
| H | -4.75441200 | 5.04733200  | 3.19326700  |
| C | 0.66942300  | -5.96520900 | -1.19164400 |
| H | 0.02286500  | -6.73612900 | -0.78167700 |
| C | 2.08085900  | -6.09457300 | -1.06278600 |
| H | 2.49824100  | -6.95504900 | -0.54726000 |
| C | 2.90471100  | -5.13953600 | -1.59204700 |
| H | 3.98407000  | -5.22227400 | -1.50130900 |
| C | 0.11777400  | -4.88064600 | -1.82075900 |
| H | -0.95888400 | -4.80678300 | -1.91141300 |
| C | -0.06199200 | 4.06033000  | -1.73481100 |
| C | 0.05297200  | 4.62555900  | -0.27690900 |
| H | 0.87323800  | 5.34290900  | -0.30767600 |
| H | -0.84797200 | 5.22487800  | -0.09228800 |
| C | 0.22475600  | 3.68542500  | 0.90817500  |
| C | 1.17516500  | 3.19222600  | -2.07021200 |
| H | 2.04340000  | 3.80708000  | -1.83822600 |
| H | 1.19759100  | 2.96868700  | -3.14345200 |
| N | 1.32782900  | 1.92935000  | -1.33086600 |
| C | 2.47683500  | 1.42437600  | -0.91670300 |
| N | 2.52728300  | 0.31944900  | -0.16622000 |
| C | 3.70831900  | -0.14774400 | 0.49124100  |
| C | 4.33148600  | 0.65880900  | 1.44532800  |
| C | 4.19562500  | -1.42487500 | 0.21759200  |
| C | 5.47688000  | 0.19984500  | 2.09479300  |
| C | 5.33684900  | -1.87547200 | 0.88156300  |
| H | 3.67666400  | -2.05497500 | -0.49407200 |



|   |             |             |             |
|---|-------------|-------------|-------------|
| C | 5.98631000  | -1.06807800 | 1.81559300  |
| H | 6.86841900  | -1.42862800 | 2.33036200  |
| C | 5.84579600  | -3.26231800 | 0.57828400  |
| C | 6.18490200  | 1.09945400  | 3.07450100  |
| F | 6.02016200  | -3.43875200 | -0.75810800 |
| F | 4.98060100  | -4.21259400 | 0.98206800  |
| F | 7.03175900  | -3.51001400 | 1.17023100  |
| F | 6.81180800  | 0.39539500  | 4.03833200  |
| F | 5.32984400  | 1.95485100  | 3.67590900  |
| F | 7.12613400  | 1.85237000  | 2.45777600  |
| S | 4.05792000  | 2.15667000  | -1.32281900 |
| H | 3.90641000  | 1.62207200  | 1.70220000  |
| H | 1.67960700  | -0.24925800 | -0.01493500 |
| H | 0.48849400  | 1.35287900  | -1.12757700 |
| C | 1.29887000  | 3.71879700  | 1.73042300  |
| H | 3.64512600  | 2.68951400  | -2.48775200 |
| N | -1.07108400 | -1.36388100 | 1.49816900  |
| S | 0.36366800  | -1.84721000 | 1.95997900  |
| O | 0.83545800  | -1.16064700 | 3.16766600  |
| O | 1.33479400  | -1.98408600 | 0.83952600  |
| C | 0.05048700  | -3.60410500 | 2.50928400  |
| F | -0.81577400 | -3.62002800 | 3.53463700  |
| F | 1.19840500  | -4.16035500 | 2.91252700  |
| F | -0.45652000 | -4.33017500 | 1.50887100  |
| C | -1.40215100 | 3.38027300  | -2.07040700 |
| C | -2.61437600 | 3.97130400  | -1.67406600 |
| C | -1.47923300 | 2.24888900  | -2.89433800 |
| C | -3.84255300 | 3.45159900  | -2.07461200 |
| H | -2.61136600 | 4.85165600  | -1.03914300 |
| C | -2.70820300 | 1.71945700  | -3.29447300 |
| H | -0.57984300 | 1.74363100  | -3.22672200 |
| C | -3.89680000 | 2.32038200  | -2.89001600 |
| H | -4.75776100 | 3.92820900  | -1.73702400 |
| H | -2.72935700 | 0.82822100  | -3.91610500 |
| H | -4.85477300 | 1.91149900  | -3.20030800 |
| C | -0.00365400 | 5.30207600  | -2.73463000 |
| H | -0.18107900 | 4.89944000  | -3.74031600 |
| H | -0.88576700 | 5.90299900  | -2.50407100 |
| C | 1.23939200  | 6.17955200  | -2.77933700 |
| C | 1.34999100  | 7.35507900  | -2.12036600 |
| C | -0.97656800 | 2.81424000  | 1.19746800  |
| H | -1.86228500 | 3.44159100  | 1.36485900  |
| H | -1.22826800 | 2.15621500  | 0.36072700  |
| H | -0.85211800 | 2.18845000  | 2.08111500  |

|   |             |            |             |
|---|-------------|------------|-------------|
| C | 2.35332400  | 5.70760000 | -3.71107200 |
| H | 2.66071700  | 6.49414800 | -4.40906700 |
| H | 3.26022800  | 5.39419000 | -3.17478100 |
| H | 2.02513700  | 4.85953900 | -4.31955700 |
| C | 1.39960900  | 2.84252700 | 2.97333900  |
| H | 2.42575500  | 2.83276500 | 3.35938500  |
| H | 0.76356500  | 3.22073900 | 3.78541800  |
| H | 1.10676200  | 1.80170800 | 2.80485300  |
| C | 2.58464300  | 8.22666900 | -2.20962600 |
| H | 2.90294100  | 8.54173800 | -1.20693900 |
| H | 3.43597200  | 7.73943700 | -2.68807800 |
| H | 2.36849800  | 9.14993200 | -2.76684300 |
| C | 2.48699100  | 4.64804700 | 1.58688000  |
| H | 3.42678400  | 4.08054700 | 1.53069800  |
| H | 2.45438900  | 5.30766000 | 0.71766900  |
| H | 2.57591700  | 5.28318600 | 2.48032300  |
| C | 0.28110500  | 7.97071800 | -1.24606000 |
| H | 0.11356200  | 9.01596500 | -1.54010200 |
| H | -0.67948800 | 7.45549100 | -1.28421700 |
| H | 0.60050800  | 7.99360500 | -0.19494300 |

INT-16' -11

0 imaginary frequency

H = -5472.497161

G = -5472.714391

E(M06-2X-DCM) = -5473.478485

|   |            |             |             |
|---|------------|-------------|-------------|
| O | 0.98994600 | -2.97214300 | -0.23450000 |
| O | 2.95850500 | -1.30549000 | 0.01269500  |
| P | 1.32444100 | -1.37108900 | -0.04774100 |
| O | 0.78740600 | -0.79564900 | 1.21128500  |
| C | 2.16248600 | -5.38041500 | 2.97850300  |
| C | 3.03970200 | -5.10724500 | 1.93367600  |
| C | 2.61891800 | -4.35461300 | 0.82798600  |
| C | 0.41673800 | -4.09080500 | 1.84701400  |
| C | 0.85638300 | -4.89227800 | 2.91359600  |
| C | 3.73600400 | -1.77695100 | -1.04041800 |
| C | 3.93731100 | -3.14847400 | -1.19605700 |
| C | 4.55767000 | -3.61566000 | -2.36536100 |
| C | 5.08308700 | -2.72459000 | -3.29574500 |
| C | 5.00861500 | -1.35446600 | -3.03970400 |
| C | 4.33429800 | -0.84894100 | -1.91649000 |
| H | 0.15587000 | -5.11642600 | 3.71318400  |
| H | 5.46942300 | -0.64964200 | -3.72582500 |
| C | 3.70757500 | -4.31760000 | -0.23800500 |

|   |              |              |              |
|---|--------------|--------------|--------------|
| C | 4. 97341100  | -4. 54965700 | 0. 65923300  |
| H | 5. 27827200  | -3. 58875800 | 1. 08962200  |
| H | 5. 82144100  | -4. 94478300 | 0. 09131800  |
| H | 5. 54579900  | -5. 54258200 | -2. 22133000 |
| H | 4. 21824000  | -5. 51911600 | -3. 37653800 |
| C | 1. 33712100  | -3. 81130300 | 0. 81810000  |
| H | 2. 48396600  | -5. 96478200 | 3. 83703500  |
| H | 5. 56795500  | -3. 08536400 | -4. 19949100 |
| C | 4. 49571300  | -5. 49114400 | 1. 78642000  |
| H | 5. 06308200  | -5. 36116000 | 2. 71506000  |
| H | 4. 60098900  | -6. 54658100 | 1. 49736300  |
| C | 4. 54396100  | -5. 12950000 | -2. 40509900 |
| C | 3. 56706500  | -5. 49052000 | -1. 26316700 |
| H | 2. 53938900  | -5. 50270900 | -1. 64380600 |
| H | 3. 76904300  | -6. 46704900 | -0. 81119300 |
| C | 4. 35201500  | 0. 62247100  | -1. 63569300 |
| C | 3. 70267600  | 1. 53542700  | -2. 50183400 |
| C | 5. 10559900  | 1. 10452900  | -0. 53371700 |
| C | 2. 91040600  | 1. 11536600  | -3. 61771300 |
| C | 3. 81493400  | 2. 95684800  | -2. 25934900 |
| C | 5. 19828100  | 2. 52755200  | -0. 29833300 |
| C | 2. 29832300  | 2. 02487900  | -4. 44034700 |
| H | 2. 77352300  | 0. 05541800  | -3. 78905500 |
| C | 3. 15634700  | 3. 87280400  | -3. 13871900 |
| C | 4. 55677600  | 3. 41343200  | -1. 16768200 |
| C | 2. 42495300  | 3. 42352000  | -4. 20473000 |
| H | 1. 69155600  | 1. 67553600  | -5. 27035700 |
| H | 3. 24854400  | 4. 93661600  | -2. 93294300 |
| H | 4. 63569300  | 4. 48292100  | -0. 98947700 |
| H | 1. 93085900  | 4. 12834900  | -4. 86852800 |
| C | -1. 00207700 | -3. 60998500 | 1. 82434600  |
| C | -1. 44472500 | -2. 63893000 | 2. 75365600  |
| C | -1. 92121400 | -4. 19692900 | 0. 92019500  |
| C | -0. 55941400 | -1. 98814000 | 3. 67376500  |
| C | -2. 83986900 | -2. 26128800 | 2. 78450400  |
| C | -3. 30967200 | -3. 79899600 | 0. 95085400  |
| C | -1. 01604600 | -1. 06677400 | 4. 57967200  |
| H | 0. 49771700  | -2. 21624300 | 3. 62477300  |
| C | -3. 28128600 | -1. 30048300 | 3. 75135800  |
| C | -3. 73276600 | -2. 84748000 | 1. 88379300  |
| C | -2. 39974900 | -0. 72662900 | 4. 63217300  |
| H | -0. 31598000 | -0. 57994400 | 5. 25260600  |
| H | -4. 34219400 | -1. 05996400 | 3. 78785200  |
| H | -4. 78434700 | -2. 56765800 | 1. 91693700  |

|   |             |             |             |
|---|-------------|-------------|-------------|
| H | -2.75254400 | -0.02129300 | 5.38166900  |
| C | 6.52816400  | 0.74147600  | 1.42366400  |
| H | 7.05156800  | 0.06032200  | 2.08921700  |
| C | 5.81557200  | 0.24362300  | 0.36442500  |
| H | 5.78898600  | -0.82638900 | 0.19559600  |
| C | 6.59388400  | 2.14291300  | 1.66341400  |
| H | 7.16174900  | 2.51920300  | 2.51020700  |
| C | 5.95095500  | 3.00779900  | 0.81970000  |
| H | 5.99553100  | 4.08179900  | 0.98234500  |
| C | -2.45491100 | -5.76398800 | -0.87757100 |
| H | -2.13754800 | -6.52676200 | -1.58353300 |
| C | -3.81910000 | -5.35776400 | -0.85190100 |
| H | -4.52989600 | -5.81235700 | -1.53691400 |
| C | -4.23074800 | -4.40414000 | 0.03995200  |
| H | -5.27105200 | -4.08911800 | 0.07436500  |
| C | -1.54187000 | -5.20523000 | -0.02229000 |
| H | -0.50847200 | -5.53060100 | -0.05168200 |
| N | 0.91450900  | -0.72952900 | -1.49261500 |
| S | -0.58539700 | -0.56759600 | -1.91574800 |
| O | -1.00304900 | 0.87711100  | -2.01285900 |
| O | -1.57479300 | -1.43554000 | -1.25200500 |
| C | -0.59197700 | -1.11115100 | -3.70015300 |
| F | -1.82475400 | -0.93514800 | -4.19528000 |
| F | -0.27247400 | -2.40387500 | -3.77893600 |
| F | 0.26972600  | -0.40405200 | -4.43906200 |
| C | -5.28104700 | 1.65651700  | -0.59798300 |
| C | -5.04758700 | 3.07881500  | -1.23793100 |
| H | -5.14161400 | 3.79829800  | -0.42096600 |
| H | -5.91445500 | 3.26473100  | -1.88724400 |
| C | -3.79614900 | 3.38140400  | -2.05166600 |
| C | -4.24867800 | 1.36463300  | 0.52291000  |
| H | -4.42643500 | 2.08118400  | 1.32544900  |
| H | -4.42410300 | 0.36629300  | 0.93577600  |
| N | -2.82738700 | 1.48715100  | 0.16110100  |
| C | -1.87515400 | 2.02044200  | 0.91159900  |
| N | -0.67029700 | 2.27248500  | 0.39188400  |
| C | 0.47828200  | 2.76888600  | 1.09847700  |
| C | 1.08122600  | 2.01672800  | 2.10783300  |
| C | 1.00175000  | 4.00318300  | 0.71634500  |
| C | 2.19759300  | 2.53621000  | 2.76178400  |
| C | 2.13177800  | 4.49982200  | 1.36885300  |
| H | 0.54162100  | 4.56284000  | -0.09050500 |
| C | 2.72571500  | 3.77610900  | 2.40199700  |
| H | 3.60181200  | 4.16216600  | 2.90793100  |

|   |              |              |              |
|---|--------------|--------------|--------------|
| C | 2. 66920800  | 5. 85345300  | 0. 98915900  |
| C | 2. 87552900  | 1. 70333400  | 3. 82183100  |
| F | 2. 48269600  | 6. 11635700  | -0. 32504600 |
| F | 2. 06140200  | 6. 84675800  | 1. 67663600  |
| F | 3. 99514800  | 5. 95906200  | 1. 23785900  |
| F | 3. 69978000  | 0. 78419000  | 3. 28840500  |
| F | 3. 61381300  | 2. 47041900  | 4. 65754200  |
| F | 1. 97096800  | 1. 03964300  | 4. 57906700  |
| S | -2. 17651900 | 2. 50296100  | 2. 60252600  |
| H | 0. 71296800  | 1. 02362400  | 2. 33280700  |
| H | -0. 53990200 | 1. 96134900  | -0. 58534700 |
| H | -2. 51715100 | 1. 15599200  | -0. 76073000 |
| C | -2. 88943200 | 4. 31903200  | -1. 69301200 |
| H | -2. 74406400 | 1. 32428200  | 2. 95782000  |
| C | -6. 66960700 | 1. 78319900  | 0. 15924000  |
| H | -7. 43545300 | 1. 92177600  | -0. 61295000 |
| H | -6. 63755300 | 2. 72327600  | 0. 71532900  |
| C | -5. 37345900 | 0. 55032500  | -1. 66240700 |
| C | -4. 57058300 | -0. 59594300 | -1. 64188000 |
| C | -6. 32221400 | 0. 65795000  | -2. 69677500 |
| C | -4. 69240900 | -1. 58841100 | -2. 62082200 |
| H | -3. 81896100 | -0. 75125800 | -0. 87781200 |
| C | -6. 45666200 | -0. 33225800 | -3. 66640300 |
| H | -6. 97015100 | 1. 52854700  | -2. 75338800 |
| C | -5. 63790300 | -1. 46418900 | -3. 63461300 |
| H | -4. 03421000 | -2. 44988400 | -2. 57313000 |
| H | -7. 20070700 | -0. 21704000 | -4. 45060100 |
| H | -5. 73609500 | -2. 23420900 | -4. 39505900 |
| C | -7. 11736900 | 0. 64891000  | 1. 07216200  |
| C | -7. 10977000 | 0. 74537100  | 2. 42230600  |
| C | -7. 64800900 | -0. 57510900 | 0. 34594200  |
| H | -6. 84079200 | -1. 22399600 | -0. 01497800 |
| H | -8. 31543800 | -1. 17977000 | 0. 96262300  |
| H | -8. 21027400 | -0. 27336200 | -0. 54462500 |
| C | -7. 57564900 | -0. 36088400 | 3. 34796600  |
| H | -8. 50680000 | -0. 07420300 | 3. 85813400  |
| H | -7. 74490300 | -1. 31826800 | 2. 85439800  |
| H | -6. 83515800 | -0. 52904600 | 4. 14217900  |
| C | -3. 67024500 | 2. 65942900  | -3. 38135400 |
| H | -3. 20255700 | 1. 67257800  | -3. 28344000 |
| H | -4. 65533500 | 2. 49748000  | -3. 82984200 |
| H | -3. 07060900 | 3. 22752400  | -4. 09666100 |
| C | -1. 68773600 | 4. 63525000  | -2. 57331300 |
| H | -1. 14171200 | 3. 73557000  | -2. 87610600 |

|   |             |            |             |
|---|-------------|------------|-------------|
| H | -1.98197200 | 5.16087200 | -3.49243600 |
| H | -0.98253700 | 5.29146000 | -2.05109000 |
| C | -2.94638000 | 5.17611900 | -0.44793200 |
| H | -3.81164700 | 4.99965100 | 0.19330600  |
| H | -2.04675200 | 5.03344300 | 0.16758700  |
| H | -2.95388200 | 6.24014300 | -0.72420400 |
| C | -6.65994700 | 1.95695300 | 3.21284700  |
| H | -7.42940400 | 2.23237900 | 3.94722700  |
| H | -5.75554900 | 1.72879300 | 3.79573300  |
| H | -6.44967700 | 2.84406200 | 2.61332600  |

INT-16' -12

0 imaginary frequency

H = -5472.497162

G = -5472.714401

E(M06-2X-DCM) = -5473.478485

|   |            |             |             |
|---|------------|-------------|-------------|
| O | 0.98900900 | -2.97175600 | -0.23452700 |
| O | 2.95869400 | -1.30651900 | 0.01317900  |
| P | 1.32459900 | -1.37097800 | -0.04709800 |
| O | 0.78808000 | -0.79574200 | 1.21223100  |
| C | 2.16004200 | -5.38195200 | 2.97760600  |
| C | 3.03745000 | -5.10890000 | 1.93291000  |
| C | 2.61714700 | -4.35563300 | 0.82746900  |
| C | 0.41509900 | -4.09090000 | 1.84653300  |
| C | 0.85422500 | -4.89303000 | 2.91283200  |
| C | 3.73577700 | -1.77810000 | -1.04018700 |
| C | 3.93631600 | -3.14969400 | -1.19620000 |
| C | 4.55638500 | -3.61692600 | -2.36563600 |
| C | 5.08226400 | -2.72589500 | -3.29580100 |
| C | 5.00846000 | -1.35579900 | -3.03945000 |
| C | 4.33441100 | -0.85018100 | -1.91610100 |
| H | 0.15354500 | -5.11706300 | 3.71230800  |
| H | 5.46956900 | -0.65105100 | -3.72544600 |
| C | 3.70587800 | -4.31893700 | -0.23847000 |
| C | 4.97154100 | -4.55201200 | 0.65873300  |
| H | 5.27695000 | -3.59142700 | 1.08943400  |
| H | 5.81936100 | -4.94744900 | 0.09072000  |
| H | 5.54342000 | -5.54444500 | -2.22206000 |
| H | 4.21592400 | -5.51993200 | -3.37731900 |
| C | 1.33567500 | -3.81155000 | 0.81774200  |
| H | 2.48116100 | -5.96681700 | 3.83593300  |
| H | 5.56695000 | -3.08669000 | -4.19963800 |
| C | 4.49325300 | -5.49358100 | 1.78560300  |
| H | 5.06064100 | -5.36419700 | 2.71431500  |

|   |              |              |              |
|---|--------------|--------------|--------------|
| H | 4. 59795600  | -6. 54898800 | 1. 49623300  |
| C | 4. 54182300  | -5. 13074700 | -2. 40576600 |
| C | 3. 56468500  | -5. 49149600 | -1. 26395900 |
| H | 2. 53701000  | -5. 50296600 | -1. 64462200 |
| H | 3. 76606700  | -6. 46827000 | -0. 81224600 |
| C | 4. 35261800  | 0. 62119800  | -1. 63520900 |
| C | 3. 70394300  | 1. 53439100  | -2. 50161900 |
| C | 5. 10590900  | 1. 10298700  | -0. 53291800 |
| C | 2. 91178700  | 1. 11463000  | -3. 61768900 |
| C | 3. 81673600  | 2. 95577400  | -2. 25917600 |
| C | 5. 19907900  | 2. 52598300  | -0. 29755800 |
| C | 2. 30034500  | 2. 02437100  | -4. 44055000 |
| H | 2. 77444700  | 0. 05473900  | -3. 78901100 |
| C | 3. 15885400  | 3. 87198200  | -3. 13881300 |
| C | 4. 55835700  | 3. 41209400  | -1. 16724500 |
| C | 2. 42756800  | 3. 42296700  | -4. 20501300 |
| H | 1. 69362600  | 1. 67524700  | -5. 27069200 |
| H | 3. 25145900  | 4. 93576000  | -2. 93306400 |
| H | 4. 63770500  | 4. 48155700  | -0. 98909000 |
| H | 1. 93397600  | 4. 12797900  | -4. 86899100 |
| C | -1. 00340900 | -3. 60916700 | 1. 82405100  |
| C | -1. 44539900 | -2. 63815400 | 2. 75371700  |
| C | -1. 92295900 | -4. 19521400 | 0. 91974000  |
| C | -0. 55962600 | -1. 98824400 | 3. 67400600  |
| C | -2. 84029900 | -2. 25963400 | 2. 78475600  |
| C | -3. 31116300 | -3. 79640700 | 0. 95059000  |
| C | -1. 01561200 | -1. 06687000 | 4. 58022900  |
| H | 0. 49735300  | -2. 21701400 | 3. 62487800  |
| C | -3. 28105100 | -1. 29888400 | 3. 75197100  |
| C | -3. 73361200 | -2. 84494600 | 1. 88388100  |
| C | -2. 39909700 | -0. 72586600 | 4. 63292000  |
| H | -0. 31519200 | -0. 58068000 | 5. 25325800  |
| H | -4. 34180900 | -1. 05772900 | 3. 78863500  |
| H | -4. 78501300 | -2. 56446100 | 1. 91717600  |
| H | -2. 75140000 | -0. 02055200 | 5. 38266700  |
| C | 6. 52733200  | 0. 73944000  | 1. 42520200  |
| H | 7. 05008000  | 0. 05809700  | 2. 09107600  |
| C | 5. 81508900  | 0. 24183400  | 0. 36561500  |
| H | 5. 78814300  | -0. 82817600 | 0. 19683700  |
| C | 6. 59352900  | 2. 14086500  | 1. 66491400  |
| H | 7. 16113600  | 2. 51695700  | 2. 51196900  |
| C | 5. 95140900  | 3. 00597700  | 0. 82081800  |
| H | 5. 99636700  | 4. 07996900  | 0. 98341200  |
| C | -2. 45770900 | -5. 76131100 | -0. 87855100 |

|   |             |             |             |
|---|-------------|-------------|-------------|
| H | -2.14085700 | -6.52404500 | -1.58478600 |
| C | -3.82164400 | -5.35424100 | -0.85267600 |
| H | -4.53275900 | -5.80815300 | -1.53781100 |
| C | -4.23265500 | -4.40066100 | 0.03951800  |
| H | -5.27276500 | -4.08501200 | 0.07409100  |
| C | -1.54428200 | -5.20342200 | -0.02311400 |
| H | -0.51108700 | -5.52942300 | -0.05265700 |
| N | 0.91503700  | -0.72838500 | -1.49162900 |
| S | -0.58463100 | -0.56636800 | -1.91550800 |
| O | -1.00182300 | 0.87839000  | -2.01371400 |
| O | -1.57460200 | -1.43342100 | -1.25141400 |
| C | -0.59083800 | -1.11131700 | -3.69950100 |
| F | 0.27102600  | -0.40479300 | -4.43876700 |
| F | -1.82348900 | -0.93573400 | -4.19507000 |
| F | -0.27126800 | -2.40409700 | -3.77713800 |
| C | -5.28046500 | 1.65706300  | -0.59780500 |
| C | -5.04665100 | 3.07995600  | -1.23628200 |
| H | -5.14072700 | 3.79864000  | -0.41862000 |
| H | -5.91337500 | 3.26668200  | -1.88556400 |
| C | -3.79507100 | 3.38326500  | -2.04953500 |
| C | -4.24816100 | 1.36378600  | 0.52280600  |
| H | -4.42585200 | 2.07943500  | 1.32614400  |
| H | -4.42364100 | 0.36499400  | 0.93454000  |
| N | -2.82685600 | 1.48657900  | 0.16119300  |
| C | -1.87479200 | 2.02023900  | 0.91165900  |
| N | -0.66994900 | 2.27233300  | 0.39200300  |
| C | 0.47869100  | 2.76870900  | 1.09845800  |
| C | 1.08131900  | 2.01683800  | 2.10821800  |
| C | 1.00259500  | 4.00265100  | 0.71578800  |
| C | 2.19788600  | 2.53621500  | 2.76192700  |
| C | 2.13275400  | 4.49921700  | 1.36813300  |
| H | 0.54271100  | 4.56210100  | -0.09134500 |
| C | 2.72644300  | 3.77576600  | 2.40159700  |
| H | 3.60267500  | 4.16171400  | 2.90737200  |
| C | 2.67053500  | 5.85255100  | 0.98789100  |
| C | 2.87537400  | 1.70345300  | 3.82234900  |
| F | 3.99643600  | 5.95803800  | 1.23682700  |
| F | 2.48434600  | 6.11485800  | -0.32648700 |
| F | 2.06274400  | 6.84630900  | 1.67474200  |
| F | 3.61546200  | 2.47024900  | 4.65671700  |
| F | 1.97031300  | 1.04197500  | 4.58095600  |
| F | 3.69775700  | 0.78243700  | 3.28928400  |
| S | -2.17640200 | 2.50306900  | 2.60249500  |
| H | 0.71268300  | 1.02400300  | 2.33375500  |



|   |             |             |             |
|---|-------------|-------------|-------------|
| H | -0.53965100 | 1.96163500  | -0.58540700 |
| H | -2.51637300 | 1.15459100  | -0.76024400 |
| C | -2.88872800 | 4.32098300  | -1.69019400 |
| H | -2.74290900 | 1.32400700  | 2.95827000  |
| C | -6.66900500 | 1.78332800  | 0.15950900  |
| H | -7.43475200 | 1.92318800  | -0.61254900 |
| H | -6.63660700 | 2.72268500  | 0.71679600  |
| C | -5.37318800 | 0.55195900  | -1.66334100 |
| C | -4.57080900 | -0.59467900 | -1.64385100 |
| C | -6.32183600 | 0.66094800  | -2.69767500 |
| C | -4.69297800 | -1.58614600 | -2.62376400 |
| H | -3.81932000 | -0.75107200 | -0.87987100 |
| C | -6.45662000 | -0.32826300 | -3.66827100 |
| H | -6.96942600 | 1.53185600  | -2.75348500 |
| C | -5.63832600 | -1.46056000 | -3.63751900 |
| H | -4.03517800 | -2.44797000 | -2.57685300 |
| H | -7.20056200 | -0.21197900 | -4.45241000 |
| H | -5.73677800 | -2.22981100 | -4.39871000 |
| C | -7.11726600 | 0.64807300  | 1.07096800  |
| C | -7.10965600 | 0.74282900  | 2.42123000  |
| C | -7.64844000 | -0.57487400 | 0.34328000  |
| H | -8.31747500 | -1.17900900 | 0.95875000  |
| H | -8.20911400 | -0.27195200 | -0.54787300 |
| H | -6.84156500 | -1.22461700 | -0.01688900 |
| C | -7.57606700 | -0.36443100 | 3.34542900  |
| H | -6.83572100 | -0.53393700 | 4.13948900  |
| H | -8.50714600 | -0.07802900 | 3.85589000  |
| H | -7.74565900 | -1.32109900 | 2.85059100  |
| C | -3.66876700 | 2.66214400  | -3.37964500 |
| H | -3.20094200 | 1.67530900  | -3.28217600 |
| H | -4.65371000 | 2.50031700  | -3.82848600 |
| H | -3.06903200 | 3.23073500  | -4.09447300 |
| C | -1.68708900 | 4.63825000  | -2.57021400 |
| H | -1.98150300 | 5.16459900  | -3.48887600 |
| H | -0.98207400 | 5.29422000  | -2.04744300 |
| H | -1.14083700 | 3.73898800  | -2.87382700 |
| C | -2.94606500 | 5.17730500  | -0.44461000 |
| H | -2.04638700 | 5.03455700  | 0.17083300  |
| H | -2.95392500 | 6.24150700  | -0.72018100 |
| H | -3.81128200 | 5.00011600  | 0.19649500  |
| C | -6.65938400 | 1.95322900  | 3.21331900  |
| H | -7.42882800 | 2.22813000  | 3.94791200  |
| H | -5.75518500 | 1.72392300  | 3.79606300  |
| H | -6.44859500 | 2.84096200  | 2.61490200  |

INT-16' -13

0 imaginary frequency

H = -5472.494358

G = -5472.713090

E(M06-2X-DCM) = -5473.482807

|   |             |             |             |
|---|-------------|-------------|-------------|
| O | -1.26875100 | -1.98263500 | -1.61746700 |
| O | -2.87123000 | -0.65476500 | -0.05955000 |
| P | -1.28685300 | -0.99329300 | -0.29771800 |
| O | -0.55985500 | 0.28943300  | -0.56999000 |
| C | -2.73643100 | -0.47811800 | -5.24399900 |
| C | -3.60009200 | -0.97975100 | -4.27543000 |
| C | -3.09412200 | -1.55565700 | -3.10093700 |
| C | -0.82096400 | -1.04619000 | -3.82156000 |
| C | -1.36158300 | -0.55299100 | -5.02374300 |
| C | -3.76414700 | -1.69571400 | 0.21765800  |
| C | -4.25092800 | -2.47402800 | -0.83508500 |
| C | -5.00291000 | -3.62527100 | -0.55051600 |
| C | -5.35890500 | -3.93815800 | 0.75563900  |
| C | -4.97841000 | -3.07328100 | 1.77940600  |
| C | -4.17712600 | -1.94345100 | 1.54320000  |
| H | -0.67576400 | -0.20576300 | -5.79079100 |
| H | -5.29037800 | -3.27296700 | 2.80031000  |
| C | -4.21657100 | -2.25409000 | -2.34521100 |
| C | -5.44078100 | -1.39981100 | -2.81899900 |
| H | -5.49178200 | -0.49254500 | -2.20561900 |
| H | -6.39048300 | -1.93218300 | -2.70851000 |
| H | -6.37327500 | -4.27167600 | -2.10248100 |
| H | -5.14007200 | -5.46590300 | -1.71271100 |
| C | -1.72451200 | -1.51445800 | -2.84396600 |
| H | -3.11943300 | -0.05134400 | -6.16770200 |
| H | -5.93987600 | -4.82973800 | 0.97780600  |
| C | -5.11299500 | -1.02445000 | -4.28090900 |
| H | -5.56091500 | -0.07126000 | -4.58523500 |
| H | -5.48537100 | -1.78343600 | -4.98308700 |
| C | -5.31817100 | -4.38948500 | -1.81734100 |
| C | -4.37952600 | -3.72871700 | -2.84717900 |
| H | -3.39864400 | -4.21701500 | -2.82011000 |
| H | -4.75124300 | -3.78230500 | -3.87530700 |
| C | -3.90285700 | -1.03886700 | 2.70652400  |
| C | -3.06636000 | -1.46651700 | 3.76494800  |
| C | -4.62979000 | 0.17301500  | 2.81879600  |
| C | -2.32612400 | -2.69063100 | 3.71799600  |
| C | -2.94207700 | -0.65062700 | 4.95297700  |

|   |             |             |             |
|---|-------------|-------------|-------------|
| C | -4.49344700 | 0.97995300  | 4.01094500  |
| C | -1.53090400 | -3.08145700 | 4.76211000  |
| H | -2.37111300 | -3.29347500 | 2.82067400  |
| C | -2.10308200 | -1.09780200 | 6.02186400  |
| C | -3.65291500 | 0.54886600  | 5.04090100  |
| C | -1.41942200 | -2.27997500 | 5.93334700  |
| H | -0.95634400 | -3.99922400 | 4.68225000  |
| H | -2.02405400 | -0.47373800 | 6.90931600  |
| H | -3.56152500 | 1.15557600  | 5.94000900  |
| H | -0.78111200 | -2.60707900 | 6.74982400  |
| C | 0.66597500  | -1.08310900 | -3.66576600 |
| C | 1.41323000  | 0.12010000  | -3.75802000 |
| C | 1.33960500  | -2.32415900 | -3.53225000 |
| C | 0.80395800  | 1.41095700  | -3.88754800 |
| C | 2.85794300  | 0.07215900  | -3.72794000 |
| C | 2.78363700  | -2.35200600 | -3.46321200 |
| C | 1.55314400  | 2.55268200  | -4.02364200 |
| H | -0.27695900 | 1.47715300  | -3.88609400 |
| C | 3.60431900  | 1.28512800  | -3.86616200 |
| C | 3.50302900  | -1.15805800 | -3.57336500 |
| C | 2.97640200  | 2.49235100  | -4.02073800 |
| H | 1.05567000  | 3.51234600  | -4.14188000 |
| H | 4.68999300  | 1.22213300  | -3.85615800 |
| H | 4.58977500  | -1.18893600 | -3.53709600 |
| H | 3.55770300  | 3.40238600  | -4.14775900 |
| C | -6.26726100 | 1.78196300  | 1.97445100  |
| H | -6.96826900 | 2.09012400  | 1.20285300  |
| C | -5.54955000 | 0.62459200  | 1.81828800  |
| H | -5.68554700 | 0.02554400  | 0.92513700  |
| C | -6.11135000 | 2.58412900  | 3.14042800  |
| H | -6.68780200 | 3.49944500  | 3.24774300  |
| C | -5.24651100 | 2.19051600  | 4.12599300  |
| H | -5.12553700 | 2.78598400  | 5.02828500  |
| C | 1.33737500  | -4.76132000 | -3.35663600 |
| H | 0.78916100  | -5.69881300 | -3.32535000 |
| C | 2.75623800  | -4.77668600 | -3.24715500 |
| H | 3.27686600  | -5.72205100 | -3.12226800 |
| C | 3.45770800  | -3.60386100 | -3.30487600 |
| H | 4.54084000  | -3.59783400 | -3.22207600 |
| C | 0.65610600  | -3.58112300 | -3.49588000 |
| H | -0.42328900 | -3.59517000 | -3.58264600 |
| C | -0.45587800 | 4.46117300  | 0.23935500  |
| C | -0.36772500 | 4.38796100  | 1.80997400  |
| H | 0.41526400  | 5.09354500  | 2.09639800  |

|   |             |             |             |
|---|-------------|-------------|-------------|
| H | -1.29818300 | 4.82102600  | 2.20068700  |
| C | -0.14599100 | 3.05772300  | 2.51482800  |
| C | 0.83866400  | 3.90188400  | -0.39990500 |
| H | 1.65680300  | 4.45906400  | 0.05595200  |
| H | 0.84348600  | 4.12079600  | -1.47286400 |
| N | 1.13263800  | 2.47323600  | -0.20609800 |
| C | 2.33307400  | 1.96350200  | 0.00626900  |
| N | 2.50704900  | 0.66035300  | 0.25036600  |
| C | 3.73878200  | 0.08638200  | 0.69598500  |
| C | 4.28310300  | 0.48408100  | 1.91846700  |
| C | 4.35760600  | -0.90413100 | -0.06500700 |
| C | 5.47931000  | -0.08186400 | 2.35786300  |
| C | 5.54955400  | -1.46829700 | 0.39025300  |
| H | 3.90064900  | -1.23240100 | -0.99034900 |
| C | 6.11953500  | -1.05904400 | 1.59588200  |
| H | 7.04218300  | -1.50695100 | 1.94417000  |
| C | 6.20171200  | -2.54226000 | -0.44366700 |
| C | 6.09909300  | 0.39711500  | 3.64506900  |
| F | 6.37232700  | -2.12910400 | -1.72738900 |
| F | 5.45198800  | -3.66015500 | -0.49579500 |
| F | 7.41707900  | -2.88582700 | 0.02863700  |
| F | 6.96177000  | 1.41702500  | 3.42469800  |
| F | 6.79359300  | -0.58101800 | 4.26051400  |
| F | 5.16661600  | 0.85087200  | 4.51038700  |
| S | 3.82448500  | 2.95250600  | -0.01558500 |
| H | 3.75996600  | 1.20485400  | 2.53607000  |
| H | 1.72665700  | -0.00325800 | 0.12801800  |
| H | 0.36293100  | 1.78055500  | -0.27561800 |
| C | 0.91226900  | 2.81487800  | 3.32250500  |
| H | 3.35837500  | 3.85072700  | -0.90344300 |
| N | -0.87027400 | -1.93084900 | 0.94480100  |
| S | 0.61393600  | -2.41304100 | 1.21113000  |
| O | 1.02133600  | -2.25529300 | 2.61142200  |
| O | 1.58078500  | -1.96307100 | 0.17203200  |
| C | 0.50028600  | -4.25969300 | 0.95853900  |
| F | 1.70709400  | -4.81146900 | 1.12834900  |
| F | 0.06161300  | -4.54376300 | -0.27118100 |
| F | -0.34528000 | -4.79717200 | 1.85179500  |
| C | -1.74974000 | 3.87581500  | -0.34805700 |
| C | -2.99326700 | 4.21240600  | 0.21567700  |
| C | -1.76151900 | 3.08571100  | -1.50458800 |
| C | -4.18952600 | 3.78034100  | -0.35046700 |
| H | -3.03868700 | 4.82492900  | 1.11102100  |
| C | -2.95866900 | 2.64396100  | -2.07438800 |

|   |             |            |             |
|---|-------------|------------|-------------|
| H | -0.83535500 | 2.78685600 | -1.98062200 |
| C | -4.17901700 | 2.99298100 | -1.50333500 |
| H | -5.13059600 | 4.05238000 | 0.11818000  |
| H | -2.92799500 | 2.01600300 | -2.96077600 |
| H | -5.11181400 | 2.65087400 | -1.94366800 |
| C | -0.42097800 | 6.01756900 | -0.08753000 |
| H | -1.28828300 | 6.45288000 | 0.42285200  |
| H | 0.45817200  | 6.42892900 | 0.41812400  |
| C | -0.44610000 | 6.46181400 | -1.54291700 |
| C | 0.66173300  | 6.83954400 | -2.22124100 |
| C | -1.28054200 | 2.06852800 | 2.36987500  |
| H | -1.14698600 | 1.17417900 | 2.97833000  |
| H | -2.22690800 | 2.53362100 | 2.67522000  |
| H | -1.42521500 | 1.74325600 | 1.33528800  |
| C | -1.82286100 | 6.53049800 | -2.19076500 |
| H | -2.02134800 | 5.67302700 | -2.84493200 |
| H | -2.60980400 | 6.52537500 | -1.43285500 |
| H | -1.94723100 | 7.43969200 | -2.78759700 |
| C | 1.06276900  | 1.50727600 | 4.09127700  |
| H | 0.37060800  | 1.45674700 | 4.94275300  |
| H | 0.87883000  | 0.61576900 | 3.48380300  |
| H | 2.07414700  | 1.41485200 | 4.50394500  |
| C | 0.62211800  | 7.28543200 | -3.66843600 |
| H | -0.31845800 | 7.05646300 | -4.17147700 |
| H | 0.79466200  | 8.36878900 | -3.75054300 |
| H | 1.42796400  | 6.80407900 | -4.23927800 |
| C | 2.02903800  | 3.79107000 | 3.63072100  |
| H | 1.95577500  | 4.75414300 | 3.12196300  |
| H | 2.06061300  | 3.99253900 | 4.71122400  |
| H | 3.00987000  | 3.36323300 | 3.37923000  |
| C | 2.06384400  | 6.89584900 | -1.65411500 |
| H | 2.70613100  | 6.12830600 | -2.11351600 |
| H | 2.53008000  | 7.86019100 | -1.89776300 |
| H | 2.11802400  | 6.77280300 | -0.57056700 |

INT-16<sup>7</sup>-14

0 imaginary frequency

H = -5472.493182

G = -5472.711636

E(M06-2X-DCM) = -5473.480923

|   |             |             |             |
|---|-------------|-------------|-------------|
| O | -1.55976800 | -2.43499700 | -0.81248700 |
| O | -2.96041700 | -0.41104200 | 0.02716100  |
| P | -1.42943200 | -0.98999400 | -0.02822800 |
| O | -0.58055600 | -0.02628300 | -0.80149500 |

|   |             |             |             |
|---|-------------|-------------|-------------|
| C | -2.96745700 | -2.42137200 | -4.76043500 |
| C | -3.84963800 | -2.37401900 | -3.68570000 |
| C | -3.37258700 | -2.46297900 | -2.36997400 |
| C | -1.08157800 | -2.55922800 | -3.19842100 |
| C | -1.60273800 | -2.55292400 | -4.50574100 |
| C | -3.95019800 | -1.13898300 | 0.69665800  |
| C | -4.54941300 | -2.22506000 | 0.05386500  |
| C | -5.41099400 | -3.06489500 | 0.77796200  |
| C | -5.75735200 | -2.76876200 | 2.09055800  |
| C | -5.25658800 | -1.60457800 | 2.66894600  |
| C | -4.34866800 | -0.76809700 | 1.99791400  |
| H | -0.90767500 | -2.63618100 | -5.33596300 |
| H | -5.55746000 | -1.32748000 | 3.67501900  |
| C | -4.53957900 | -2.65447700 | -1.41104000 |
| C | -5.67734900 | -1.94081500 | -2.21658700 |
| H | -5.60784500 | -0.86157000 | -2.03678700 |
| H | -6.67576300 | -2.26795700 | -1.91034300 |
| H | -6.89258000 | -4.13704700 | -0.38752400 |
| H | -5.78335300 | -5.19336500 | 0.48022200  |
| C | -1.99955600 | -2.47294500 | -2.13029000 |
| H | -3.33044500 | -2.37723500 | -5.78434400 |
| H | -6.42248600 | -3.41916600 | 2.65302600  |
| C | -5.35771000 | -2.24515200 | -3.69684900 |
| H | -5.70757400 | -1.45960300 | -4.37681800 |
| H | -5.83403800 | -3.17915000 | -4.02639100 |
| C | -5.84760300 | -4.24374100 | -0.06333400 |
| C | -4.87740000 | -4.17636900 | -1.25993300 |
| H | -3.95467200 | -4.71638500 | -1.01852200 |
| H | -5.28597900 | -4.60748400 | -2.17930400 |
| C | -3.95382300 | 0.50533700  | 2.68364900  |
| C | -3.12594200 | 0.47644400  | 3.83091000  |
| C | -4.56582200 | 1.71804300  | 2.27796500  |
| C | -2.50502600 | -0.72286100 | 4.30473000  |
| C | -2.88797100 | 1.69553200  | 4.57239400  |
| C | -4.31708100 | 2.92959800  | 3.02725700  |
| C | -1.71432900 | -0.72042400 | 5.42281200  |
| H | -2.63738500 | -1.63666200 | 3.74081100  |
| C | -2.05755900 | 1.65316200  | 5.73638200  |
| C | -3.48349300 | 2.88592000  | 4.14824000  |
| C | -1.48892000 | 0.48034800  | 6.15356800  |
| H | -1.23067000 | -1.64007800 | 5.73748300  |
| H | -1.89128200 | 2.57846400  | 6.28359200  |
| H | -3.30680000 | 3.79899300  | 4.71385700  |
| H | -0.85585100 | 0.46128400  | 7.03671300  |

|   |             |             |             |
|---|-------------|-------------|-------------|
| C | 0.39638800  | -2.69649600 | -3.01594100 |
| C | 1.26831600  | -1.73253500 | -3.58593900 |
| C | 0.93309100  | -3.83818800 | -2.36774500 |
| C | 0.80033600  | -0.55189800 | -4.25006600 |
| C | 2.69911100  | -1.92672900 | -3.51417300 |
| C | 2.36672300  | -3.99867500 | -2.26958400 |
| C | 1.66603100  | 0.33806900  | -4.83464400 |
| H | -0.26623000 | -0.36967400 | -4.29293600 |
| C | 3.56956000  | -0.97159900 | -4.12864400 |
| C | 3.20933300  | -3.04757600 | -2.85326900 |
| C | 3.07358300  | 0.12548000  | -4.78111700 |
| H | 1.27316700  | 1.20965000  | -5.35306000 |
| H | 4.64161500  | -1.14587000 | -4.07349200 |
| H | 4.28662000  | -3.18367200 | -2.78941400 |
| H | 3.74700900  | 0.83008000  | -5.26279000 |
| C | -6.08586000 | 2.97922000  | 0.83491500  |
| H | -6.78568100 | 3.00434300  | 0.00336500  |
| C | -5.47735500 | 1.79917000  | 1.17638700  |
| H | -5.69656900 | 0.89963300  | 0.61260600  |
| C | -5.81805300 | 4.17404100  | 1.56169700  |
| H | -6.30795700 | 5.10144800  | 1.27625000  |
| C | -4.95565600 | 4.14450900  | 2.62456100  |
| H | -4.75051300 | 5.04608700  | 3.19766600  |
| C | 0.66796500  | -5.96520900 | -1.19483400 |
| H | 0.02113700  | -6.73620200 | -0.78543000 |
| C | 2.07934600  | -6.09507100 | -1.06590400 |
| H | 2.49641600  | -6.95597800 | -0.55084600 |
| C | 2.90353900  | -5.13995600 | -1.59449400 |
| H | 3.98286400  | -5.22305600 | -1.50366600 |
| C | 0.11670500  | -4.88008500 | -1.82332500 |
| H | -0.95992200 | -4.80582400 | -1.91402500 |
| C | -0.06186600 | 4.06152600  | -1.73418000 |
| C | 0.05281800  | 4.62642400  | -0.27613700 |
| H | 0.87320700  | 5.34365400  | -0.30653400 |
| H | -0.84808600 | 5.22582800  | -0.09159700 |
| C | 0.22415500  | 3.68594700  | 0.90874100  |
| C | 1.17535200  | 3.19349200  | -2.06953600 |
| H | 2.04353100  | 3.80826600  | -1.83713000 |
| H | 1.19804500  | 2.97027700  | -3.14283400 |
| N | 1.32778600  | 1.93036500  | -1.33057400 |
| C | 2.47661600  | 1.42507600  | -0.91632100 |
| N | 2.52663700  | 0.31967700  | -0.16648500 |
| C | 3.70737400  | -0.14800600 | 0.49117400  |
| C | 4.33021300  | 0.65793200  | 1.44600100  |

|   |              |              |              |
|---|--------------|--------------|--------------|
| C | 4. 19477000  | -1. 42495500 | 0. 21686600  |
| C | 5. 47536300  | 0. 19853500  | 2. 09557200  |
| C | 5. 33574600  | -1. 87600100 | 0. 88096300  |
| H | 3. 67605700  | -2. 05459900 | -0. 49538100 |
| C | 5. 98488300  | -1. 06922000 | 1. 81573500  |
| H | 6. 86678500  | -1. 43013400 | 2. 33061100  |
| C | 5. 84479600  | -3. 26262800 | 0. 57686500  |
| C | 6. 18317600  | 1. 09737000  | 3. 07614100  |
| F | 7. 03016700  | -3. 51104700 | 1. 16970100  |
| F | 6. 02039800  | -3. 43782900 | -0. 75952100 |
| F | 4. 97908300  | -4. 21316400 | 0. 97893300  |
| F | 7. 12639500  | 1. 84881900  | 2. 46065600  |
| F | 6. 80771100  | 0. 39258800  | 4. 04099400  |
| F | 5. 32847100  | 1. 95407000  | 3. 67617600  |
| S | 4. 05794500  | 2. 15733100  | -1. 32142300 |
| H | 3. 90507800  | 1. 62103400  | 1. 70335000  |
| H | 1. 67872800  | -0. 24884600 | -0. 01599900 |
| H | 0. 48836900  | 1. 35399300  | -1. 12747900 |
| C | 1. 29811200  | 3. 71883900  | 1. 73120600  |
| H | 3. 64554000  | 2. 69163300  | -2. 48581900 |
| N | -1. 07080400 | -1. 36474200 | 1. 49776600  |
| S | 0. 36392800  | -1. 84882100 | 1. 95901300  |
| O | 0. 83619300  | -1. 16302500 | 3. 16693300  |
| O | 1. 33471000  | -1. 98546300 | 0. 83826600  |
| C | 0. 05020200  | -3. 60589000 | 2. 50745800  |
| F | -0. 45726100 | -4. 33122300 | 1. 50673400  |
| F | -0. 81585600 | -3. 62213500 | 3. 53298200  |
| F | 1. 19801000  | -4. 16276600 | 2. 91016000  |
| C | -1. 40195300 | 3. 38153800  | -2. 07014100 |
| C | -2. 61424400 | 3. 97248700  | -1. 67388000 |
| C | -1. 47890200 | 2. 25027700  | -2. 89425700 |
| C | -3. 84235600 | 3. 45281400  | -2. 07467000 |
| H | -2. 61133100 | 4. 85274300  | -1. 03882200 |
| C | -2. 70780900 | 1. 72088600  | -3. 29464500 |
| H | -0. 57946400 | 1. 74509200  | -3. 22662600 |
| C | -3. 89647400 | 2. 32172300  | -2. 89025700 |
| H | -4. 75762300 | 3. 92937700  | -1. 73716100 |
| H | -2. 72885300 | 0. 82975700  | -3. 91643100 |
| H | -4. 85439400 | 1. 91287500  | -3. 20075200 |
| C | -0. 00330800 | 5. 30349500  | -2. 73374300 |
| H | -0. 18056900 | 4. 90104900  | -3. 73953200 |
| H | -0. 88543900 | 5. 90439100  | -2. 50319700 |
| C | 1. 23977700  | 6. 18092500  | -2. 77804000 |
| C | 1. 35030700  | 7. 35629500  | -2. 11878000 |



|   |             |            |             |
|---|-------------|------------|-------------|
| C | -0.97735100 | 2.81485000 | 1.19752000  |
| H | -1.22827800 | 2.15624000 | 0.36099200  |
| H | -0.85358100 | 2.18962500 | 2.08166300  |
| H | -1.86327200 | 3.44220700 | 1.36373700  |
| C | 2.35384500  | 5.70914000 | -3.70969300 |
| H | 2.66164400  | 6.49593300 | -4.40722600 |
| H | 3.26052700  | 5.39524100 | -3.17330500 |
| H | 2.02560600  | 4.86144600 | -4.31866400 |
| C | 1.39840900  | 2.84203000 | 2.97379300  |
| H | 2.42433800  | 2.83237200 | 3.36040100  |
| H | 0.76178100  | 3.21964800 | 3.78568400  |
| H | 1.10595800  | 1.80120600 | 2.80461200  |
| C | 2.58501100  | 8.22785400 | -2.20758400 |
| H | 2.90320200  | 8.54253000 | -1.20473800 |
| H | 3.43637800  | 7.74076400 | -2.68611200 |
| H | 2.36896300  | 9.15133600 | -2.76447200 |
| C | 0.28130400  | 7.97177500 | -1.24449600 |
| H | 0.60040600  | 7.99408300 | -0.19327500 |
| H | 0.11409300  | 9.01719600 | -1.53809400 |
| H | -0.67940100 | 7.45679300 | -1.28317700 |
| C | 2.48648000  | 4.64785500 | 1.58823700  |
| H | 2.45414500  | 5.30787800 | 0.71932700  |
| H | 2.57543400  | 5.28255600 | 2.48198500  |
| H | 3.42614000  | 4.08015000 | 1.53191900  |

INT-16' -15

0 imaginary frequency

H = -5472.494358

G = -5472.713090

E(M06-2X-DCM) = -5473.482797

|   |             |             |             |
|---|-------------|-------------|-------------|
| O | -1.26889300 | -1.98427600 | -1.61537300 |
| O | -2.87174900 | -0.65457700 | -0.05941000 |
| P | -1.28726700 | -0.99316100 | -0.29697500 |
| O | -0.56047400 | 0.28931200  | -0.57092800 |
| C | -2.73578800 | -0.48388900 | -5.24391300 |
| C | -3.59963600 | -0.98456000 | -4.27501100 |
| C | -3.09387600 | -1.55913400 | -3.09978600 |
| C | -0.82058900 | -1.05038200 | -3.82047200 |
| C | -1.36098600 | -0.55847500 | -5.02329000 |
| C | -3.76460400 | -1.69526600 | 0.21876700  |
| C | -4.25100900 | -2.47496600 | -0.83312700 |
| C | -5.00291100 | -3.62595400 | -0.54733100 |
| C | -5.35922100 | -3.93728300 | 0.75911200  |
| C | -4.97917400 | -3.07105000 | 1.78190200  |

|   |             |             |             |
|---|-------------|-------------|-------------|
| C | -4.17802000 | -1.94139300 | 1.54448500  |
| H | -0.67502600 | -0.21204200 | -5.79057000 |
| H | -5.29143700 | -3.26947200 | 2.80296300  |
| C | -4.21637600 | -2.25683900 | -2.34350800 |
| C | -5.44060600 | -1.40324400 | -2.81853200 |
| H | -5.49186700 | -0.49530500 | -2.20617500 |
| H | -6.39025600 | -1.93563100 | -2.70766800 |
| H | -6.37286100 | -4.27452500 | -2.09876900 |
| H | -5.13945800 | -5.46800300 | -1.70733400 |
| C | -1.72432900 | -1.51757900 | -2.84256300 |
| H | -3.11860300 | -0.05810700 | -6.16815000 |
| H | -5.94010700 | -4.82868100 | 0.98222200  |
| C | -5.11253200 | -1.02946000 | -4.28078100 |
| H | -5.56052600 | -0.07668000 | -4.58627700 |
| H | -5.48463100 | -1.78928800 | -4.98219400 |
| C | -5.31778600 | -4.39175200 | -1.81329700 |
| C | -4.37906400 | -3.73205000 | -2.84376300 |
| H | -3.39813700 | -4.22021700 | -2.81599600 |
| H | -4.75063100 | -3.78687900 | -3.87188100 |
| C | -3.90441800 | -1.03512900 | 2.70665600  |
| C | -3.06797400 | -1.46092600 | 3.76586500  |
| C | -4.63193000 | 0.17656800  | 2.81708000  |
| C | -2.32730100 | -2.68484500 | 3.72082900  |
| C | -2.94425300 | -0.64327800 | 4.95273400  |
| C | -4.49614200 | 0.98529200  | 4.00808100  |
| C | -1.53214000 | -3.07386000 | 4.76566400  |
| H | -2.37194500 | -3.28902100 | 2.82438600  |
| C | -2.10528000 | -1.08857400 | 6.02241900  |
| C | -3.65558900 | 0.55605800  | 5.03879300  |
| C | -1.42115700 | -2.27061800 | 5.93574100  |
| H | -0.95727000 | -3.99155800 | 4.68727800  |
| H | -2.02665300 | -0.46319000 | 6.90897600  |
| H | -3.56460100 | 1.16410100  | 5.93704100  |
| H | -0.78287600 | -2.59630000 | 6.75280800  |
| C | 0.66631600  | -1.08726300 | -3.66444800 |
| C | 1.41369900  | 0.11576400  | -3.75800500 |
| C | 1.33981000  | -2.32822700 | -3.52949700 |
| C | 0.80452900  | 1.40654100  | -3.88877800 |
| C | 2.85840200  | 0.06770800  | -3.72798000 |
| C | 2.78384400  | -2.35614800 | -3.46048300 |
| C | 1.55381200  | 2.54805100  | -4.02611800 |
| H | -0.27638000 | 1.47282300  | -3.88719600 |
| C | 3.60488300  | 1.28045700  | -3.86756200 |
| C | 3.50336300  | -1.16240800 | -3.57208600 |

|   |              |              |              |
|---|--------------|--------------|--------------|
| C | 2. 97706300  | 2. 48757400  | -4. 02333300 |
| H | 1. 05642600  | 3. 50765100  | -4. 14524300 |
| H | 4. 69055000  | 1. 21736800  | -3. 85757100 |
| H | 4. 59011000  | -1. 19337300 | -3. 53590200 |
| H | 3. 55843900  | 3. 39742200  | -4. 15134800 |
| C | -6. 27017500 | 1. 78342800  | 1. 97024900  |
| H | -6. 97129000 | 2. 09009700  | 1. 19815000  |
| C | -5. 55181600 | 0. 62622900  | 1. 81581800  |
| H | -5. 68741400 | 0. 02580900  | 0. 92352800  |
| C | -6. 11480200 | 2. 58735800  | 3. 13508700  |
| H | -6. 69176500 | 3. 50251000  | 3. 24103500  |
| C | -5. 24983500 | 2. 19563900  | 4. 12128900  |
| H | -5. 12926600 | 2. 79247000  | 5. 02273300  |
| C | 1. 33731800  | -4. 76517200 | -3. 35094100 |
| H | 0. 78899200  | -5. 70255900 | -3. 31848900 |
| C | 2. 75618000  | -4. 78056500 | -3. 24149100 |
| H | 3. 27670800  | -5. 72583400 | -3. 11547100 |
| C | 3. 45777600  | -3. 60788600 | -3. 30066000 |
| H | 4. 54091200  | -3. 60188900 | -3. 21791300 |
| C | 0. 65617900  | -3. 58506700 | -3. 49159600 |
| H | -0. 42322100 | -3. 59910700 | -3. 57830600 |
| C | -0. 45488300 | 4. 46133800  | 0. 23566800  |
| C | -0. 36690900 | 4. 38947800  | 1. 80636800  |
| H | 0. 41594500  | 5. 09542600  | 2. 09225100  |
| H | -1. 29745800 | 4. 82274000  | 2. 19662400  |
| C | -0. 14500500 | 3. 05987100  | 2. 51235700  |
| C | 0. 83974900  | 3. 90142600  | -0. 40285600 |
| H | 1. 65784400  | 4. 45876800  | 0. 05290800  |
| H | 0. 84492800  | 4. 11962500  | -1. 47595900 |
| N | 1. 13341200  | 2. 47285000  | -0. 20797200 |
| C | 2. 33382800  | 1. 96312400  | 0. 00447900  |
| N | 2. 50775500  | 0. 66017700  | 0. 24962400  |
| C | 3. 73939700  | 0. 08651400  | 0. 69590800  |
| C | 4. 28375900  | 0. 48547800  | 1. 91796200  |
| C | 4. 35802700  | -0. 90498900 | -0. 06393900 |
| C | 5. 47979400  | -0. 08025900 | 2. 35806300  |
| C | 5. 54984500  | -1. 46889400 | 0. 39200600  |
| H | 3. 90106500  | -1. 23418600 | -0. 98894900 |
| C | 6. 11984300  | -1. 05844000 | 1. 59721200  |
| H | 7. 04236800  | -1. 50615700 | 1. 94606700  |
| C | 6. 20183000  | -2. 54390100 | -0. 44070400 |
| C | 6. 09955200  | 0. 40003900  | 3. 64478800  |
| F | 5. 45184400  | -3. 66166100 | -0. 49171900 |
| F | 7. 41706600  | -2. 88724600 | 0. 03207700  |

|   |             |             |             |
|---|-------------|-------------|-------------|
| F | 6.37267700  | -2.13213600 | -1.72484700 |
| F | 6.79426200  | -0.57737900 | 4.26113000  |
| F | 5.16701700  | 0.85442800  | 4.50971700  |
| F | 6.96200500  | 1.41991900  | 3.42342800  |
| S | 3.82533700  | 2.95195600  | -0.01890800 |
| H | 3.76074800  | 1.20705200  | 2.53473000  |
| H | 1.72729100  | -0.00352000 | 0.12823100  |
| H | 0.36353000  | 1.78031800  | -0.27674000 |
| C | 0.91343400  | 2.81774700  | 3.32001600  |
| H | 3.35885500  | 3.84954800  | -0.90720800 |
| N | -0.87077800 | -1.92892700 | 0.94693100  |
| S | 0.61332300  | -2.41119700 | 1.21374900  |
| O | 1.02081600  | -2.25178600 | 2.61381200  |
| O | 1.58022600  | -1.96279400 | 0.17402900  |
| C | 0.49925700  | -4.25813600 | 0.96347000  |
| F | -0.34639100 | -4.79431800 | 1.85739800  |
| F | 1.70595800  | -4.80995300 | 1.13393900  |
| F | 0.06050300  | -4.54362800 | -0.26589400 |
| C | -1.74865000 | 3.87548200  | -0.35146000 |
| C | -2.99224300 | 4.21192600  | 0.21225100  |
| C | -1.76028000 | 3.08512300  | -1.50779200 |
| C | -4.18840500 | 3.77941600  | -0.35372600 |
| H | -3.03777000 | 4.82467500  | 1.10743300  |
| C | -2.95735100 | 2.64292700  | -2.07743100 |
| H | -0.83405100 | 2.78635700  | -1.98375900 |
| C | -4.17773700 | 2.99175500  | -1.50640100 |
| H | -5.12952100 | 4.05124400  | 0.11493800  |
| H | -2.92656000 | 2.01474400  | -2.96365800 |
| H | -5.11047200 | 2.64925800  | -1.94655600 |
| C | -0.41991400 | 6.01741500  | -0.09258300 |
| H | -1.28733800 | 6.45320700  | 0.41719800  |
| H | 0.45913100  | 6.42929800  | 0.41283300  |
| C | -0.44477400 | 6.46027600  | -1.54838600 |
| C | 0.66307600  | 6.83762600  | -2.22686500 |
| C | -1.27957300 | 2.07053700  | 2.36841000  |
| H | -1.14620100 | 1.17695800  | 2.97803400  |
| H | -2.22596300 | 2.53606000  | 2.67298000  |
| H | -1.42405400 | 1.74398200  | 1.33419000  |
| C | -1.82136500 | 6.52839400  | -2.19677300 |
| H | -1.94743900 | 7.44005800  | -2.78956500 |
| H | -2.01717200 | 5.67354900  | -2.85516600 |
| H | -2.60887700 | 6.51780100  | -1.43958000 |
| C | 1.06429100  | 1.51081800  | 4.08981600  |
| H | 2.07642500  | 1.41789700  | 4.50053400  |

|   |             |            |             |
|---|-------------|------------|-------------|
| H | 0.37387300  | 1.46196600 | 4.94282400  |
| H | 0.87827000  | 0.61881100 | 3.48374900  |
| C | 0.62321800  | 7.28268800 | -3.67428000 |
| H | 0.79627200  | 8.36591700 | -3.75699300 |
| H | 1.42860200  | 6.80063900 | -4.24519800 |
| H | -0.31771300 | 7.05399100 | -4.17678100 |
| C | 2.06517500  | 6.89438100 | -1.65978800 |
| H | 2.11932400  | 6.77207800 | -0.57615300 |
| H | 2.70746800  | 6.12650600 | -2.11863300 |
| H | 2.53142500  | 7.85854200 | -1.90410100 |
| C | 2.03011700  | 3.79432900 | 3.62735000  |
| H | 1.95662900  | 4.75704700 | 3.11795600  |
| H | 2.06183600  | 3.99654000 | 4.70771000  |
| H | 3.01097800  | 3.36647800 | 3.37599500  |

INT-16' -2

0 imaginary frequency

H = -5472.494436

G = -5472.712517

E(M06-2X-DCM) = -5473.479237

|   |             |             |             |
|---|-------------|-------------|-------------|
| O | -1.56180900 | -2.36709800 | -1.12614500 |
| O | -3.08403600 | -0.41285600 | -0.34425300 |
| P | -1.53944200 | -0.94766100 | -0.29411500 |
| O | -0.67058800 | 0.06993300  | -0.97055400 |
| C | -2.50894400 | -2.12163400 | -5.19760500 |
| C | -3.51064700 | -2.16393100 | -4.23278300 |
| C | -3.18533400 | -2.33264800 | -2.87940800 |
| C | -0.81181100 | -2.33789100 | -3.44156800 |
| C | -1.17871600 | -2.24726300 | -4.79677800 |
| C | -4.11424200 | -1.20431900 | 0.17538500  |
| C | -4.62106600 | -2.25617600 | -0.59155700 |
| C | -5.53320800 | -3.15185100 | -0.01018500 |
| C | -6.01410000 | -2.94423400 | 1.27703100  |
| C | -5.59634800 | -1.81328100 | 1.97572600  |
| C | -4.64441000 | -0.92316500 | 1.45142000  |
| H | -0.39089000 | -2.25747100 | -5.54427200 |
| H | -6.00073000 | -1.60596400 | 2.96216500  |
| C | -4.44710600 | -2.59800800 | -2.07006300 |
| C | -5.50364500 | -1.85529000 | -2.95631500 |
| H | -5.48562100 | -0.78866300 | -2.70366900 |
| H | -6.52154200 | -2.22055800 | -2.78822300 |
| H | -6.86461500 | -4.16881300 | -1.38684100 |
| H | -5.83292700 | -5.26276200 | -0.47140600 |
| C | -1.84895600 | -2.33900700 | -2.48734300 |

|   |             |             |             |
|---|-------------|-------------|-------------|
| H | -2.75279000 | -2.00839700 | -6.25103900 |
| H | -6.71859100 | -3.63856200 | 1.72804200  |
| C | -5.01070400 | -2.05779300 | -4.40705400 |
| H | -5.30007600 | -1.23508500 | -5.07120000 |
| H | -5.42555300 | -2.97575800 | -4.84647100 |
| C | -5.85746200 | -4.28260300 | -0.96130800 |
| C | -4.76871000 | -4.13066200 | -2.04285100 |
| H | -3.86604100 | -4.67172600 | -1.73668100 |
| H | -5.07016800 | -4.51172400 | -3.02366000 |
| C | -4.33661500 | 0.31221300  | 2.24312900  |
| C | -3.60807300 | 0.22959400  | 3.45309500  |
| C | -4.92862400 | 1.53879100  | 1.85051000  |
| C | -3.01493800 | -0.98780700 | 3.91602600  |
| C | -3.44683000 | 1.41033300  | 4.27279800  |
| C | -4.75820500 | 2.71145500  | 2.67881900  |
| C | -2.31923800 | -1.03760300 | 5.09460600  |
| H | -3.09305600 | -1.87302300 | 3.29894300  |
| C | -2.71521100 | 1.31400600  | 5.49843100  |
| C | -4.01887400 | 2.61660500  | 3.86102900  |
| C | -2.16873400 | 0.12577900  | 5.90144600  |
| H | -1.85468500 | -1.96914600 | 5.40319100  |
| H | -2.60689000 | 2.21079200  | 6.10455900  |
| H | -3.90072300 | 3.50057600  | 4.48511700  |
| H | -1.61137100 | 0.06575500  | 6.83246800  |
| C | 0.63450700  | -2.46946400 | -3.08440000 |
| C | 1.54827100  | -1.44799200 | -3.44826900 |
| C | 1.10977500  | -3.65622500 | -2.47017100 |
| C | 1.13937400  | -0.21432100 | -4.05370800 |
| C | 2.96270400  | -1.63283800 | -3.21010900 |
| C | 2.52145700  | -3.80591400 | -2.19851800 |
| C | 2.05272600  | 0.73395600  | -4.44035600 |
| H | 0.08172600  | -0.03716100 | -4.20896200 |
| C | 3.88343300  | -0.61927900 | -3.62950700 |
| C | 3.40963300  | -2.79756000 | -2.58102000 |
| C | 3.44750600  | 0.53021100  | -4.23329500 |
| H | 1.71069400  | 1.64839100  | -4.91917700 |
| H | 4.94505800  | -0.79422700 | -3.46735800 |
| H | 4.47255200  | -2.92120300 | -2.38496700 |
| H | 4.15865700  | 1.28488600  | -4.55854700 |
| C | -6.34456100 | 2.85841100  | 0.35548100  |
| H | -6.97271000 | 2.92151700  | -0.52942300 |
| C | -5.74827900 | 1.66875000  | 0.68319300  |
| H | -5.90809700 | 0.79809500  | 0.05737200  |
| C | -6.15596700 | 4.01479600  | 1.16422100  |

|   |             |             |             |
|---|-------------|-------------|-------------|
| H | -6.63648800 | 4.95026100  | 0.88926400  |
| C | -5.38126200 | 3.93876600  | 2.29004300  |
| H | -5.23688600 | 4.81061800  | 2.92435100  |
| C | 0.74430400  | -5.88031700 | -1.52506700 |
| H | 0.06787200  | -6.69142600 | -1.26974700 |
| C | 2.13126800  | -6.00759700 | -1.23227000 |
| H | 2.50017300  | -6.90904000 | -0.75074100 |
| C | 2.99231700  | -4.99875200 | -1.56665500 |
| H | 4.05667300  | -5.08536900 | -1.36179800 |
| C | 0.25408800  | -4.75036900 | -2.12475600 |
| H | -0.80375000 | -4.68056300 | -2.34724100 |
| C | 0.21359200  | 4.30380400  | -1.24714000 |
| C | 0.40146400  | 4.74316800  | 0.24415600  |
| H | 1.38016700  | 5.22549200  | 0.29209900  |
| H | -0.32190900 | 5.55107300  | 0.42160800  |
| C | 0.25497500  | 3.73658100  | 1.38261300  |
| C | 1.22848200  | 3.20762800  | -1.66426900 |
| H | 2.21605300  | 3.65644700  | -1.69804600 |
| H | 1.01539000  | 2.87941200  | -2.68602300 |
| N | 1.34292000  | 1.98657600  | -0.85137100 |
| C | 2.44786000  | 1.54224600  | -0.27546800 |
| N | 2.53845100  | 0.28827500  | 0.17299900  |
| C | 3.71104200  | -0.28888400 | 0.76208300  |
| C | 4.83396500  | -0.50502000 | -0.03383200 |
| C | 3.69134500  | -0.69588100 | 2.09845300  |
| C | 5.96523600  | -1.10868500 | 0.51850300  |
| C | 4.82940100  | -1.29710100 | 2.63531100  |
| H | 2.79438000  | -0.56465800 | 2.69486400  |
| C | 5.96966900  | -1.50277900 | 1.85414900  |
| H | 6.84635100  | -1.97299600 | 2.28285800  |
| C | 4.80964100  | -1.78344300 | 4.06435500  |
| C | 7.17663400  | -1.30691100 | -0.35296500 |
| F | 4.32882200  | -3.04026300 | 4.15214100  |
| F | 4.04053700  | -1.00040700 | 4.84489400  |
| F | 6.05433800  | -1.79639000 | 4.59600200  |
| F | 7.84621300  | -0.14919200 | -0.54793300 |
| F | 6.82751500  | -1.76168000 | -1.58481500 |
| F | 8.04474200  | -2.19137400 | 0.17344100  |
| S | 3.90060400  | 2.55021500  | -0.03073200 |
| H | 4.81010500  | -0.22956900 | -1.08227900 |
| H | 1.74409500  | -0.36747000 | 0.08554900  |
| H | 0.55243500  | 1.31141200  | -0.88643400 |
| C | 1.11724000  | 3.68513500  | 2.42493000  |
| H | 3.23334800  | 3.71724600  | 0.02230500  |

|   |             |             |             |
|---|-------------|-------------|-------------|
| N | -1.28098400 | -1.36188800 | 1.24438300  |
| S | 0.10201600  | -1.91419000 | 1.76985600  |
| O | 0.51439100  | -1.29612500 | 3.04004600  |
| O | 1.15296000  | -2.02596000 | 0.71910100  |
| C | -0.27843100 | -3.68899300 | 2.21248600  |
| F | 0.83069400  | -4.28359100 | 2.66377600  |
| F | -0.72717900 | -4.35304500 | 1.14480700  |
| F | -1.21234700 | -3.73663000 | 3.17498900  |
| C | -1.24590500 | 3.95564200  | -1.61060100 |
| C | -2.27187100 | 4.86844800  | -1.30449600 |
| C | -1.60422500 | 2.81058600  | -2.33411800 |
| C | -3.58825500 | 4.64853800  | -1.70109100 |
| H | -2.04831900 | 5.77239400  | -0.74525100 |
| C | -2.92522200 | 2.58098100  | -2.72740900 |
| H | -0.87579600 | 2.04809100  | -2.57868300 |
| C | -3.92334800 | 3.50017100  | -2.42004200 |
| H | -4.35437300 | 5.37272600  | -1.43843900 |
| H | -3.16389000 | 1.66762900  | -3.26508900 |
| H | -4.95108000 | 3.32177500  | -2.72292800 |
| C | 0.55231700  | 5.56130400  | -2.17075100 |
| H | 0.27338200  | 5.27737600  | -3.19328500 |
| H | -0.15502700 | 6.34284900  | -1.88660800 |
| C | 1.97036400  | 6.11784600  | -2.20311000 |
| C | 2.38506100  | 7.16307400  | -1.45140700 |
| C | -1.01455700 | 2.91357000  | 1.37037100  |
| H | -1.14012100 | 2.31715600  | 2.27347100  |
| H | -1.88851000 | 3.57267500  | 1.29238400  |
| H | -1.07895700 | 2.23376900  | 0.51556500  |
| C | 2.90030400  | 5.50452600  | -3.24954900 |
| H | 2.37652100  | 4.76092800  | -3.85674900 |
| H | 3.28361400  | 6.26478700  | -3.94043900 |
| H | 3.77663500  | 5.00463300  | -2.81542500 |
| C | 0.93992200  | 2.71520600  | 3.58456200  |
| H | 0.59553000  | 1.72370900  | 3.27870700  |
| H | 1.88944200  | 2.57945400  | 4.11537000  |
| H | 0.21895400  | 3.09341900  | 4.32310400  |
| C | 3.78740600  | 7.72603400  | -1.54738200 |
| H | 4.48333000  | 7.08475200  | -2.09138400 |
| H | 3.77781600  | 8.70642100  | -2.04590200 |
| H | 4.20292900  | 7.89705200  | -0.54530300 |
| C | 2.29694200  | 4.61136100  | 2.64263700  |
| H | 2.44522500  | 5.36372000  | 1.86397700  |
| H | 2.16230200  | 5.15673400  | 3.58805900  |
| H | 3.23207100  | 4.04532200  | 2.75339400  |



|   |            |            |             |
|---|------------|------------|-------------|
| C | 1.52537100 | 7.93508500 | -0.47645500 |
| H | 1.87711500 | 7.79884000 | 0.55588600  |
| H | 1.59993000 | 9.01122400 | -0.68546300 |
| H | 0.46955200 | 7.66305300 | -0.50107400 |

INT-16' -3

0 imaginary frequency

H = -5472.494464

G = -5472.709815

E(M06-2X-DCM) = -5473.475920

|   |             |             |             |
|---|-------------|-------------|-------------|
| O | -2.14815700 | -1.71953700 | -1.13139500 |
| O | -3.08973900 | 0.44130900  | -0.05122800 |
| P | -1.69321600 | -0.35645400 | -0.35176800 |
| O | -0.85589300 | 0.56963900  | -1.17910700 |
| C | -4.40805000 | -1.56469900 | -4.65121500 |
| C | -5.02741000 | -1.51773800 | -3.40703500 |
| C | -4.27643900 | -1.61473800 | -2.22469800 |
| C | -2.22978600 | -1.73761400 | -3.55343100 |
| C | -3.02114000 | -1.69353500 | -4.71326300 |
| C | -4.08053600 | -0.07264200 | 0.79423300  |
| C | -4.88694900 | -1.12835900 | 0.37135000  |
| C | -5.68821500 | -1.78758300 | 1.31743400  |
| C | -5.81369300 | -1.29482200 | 2.61052000  |
| C | -5.14183800 | -0.12226800 | 2.95383400  |
| C | -4.25330200 | 0.50533400  | 2.06747300  |
| H | -2.52465500 | -1.74327900 | -5.67801200 |
| H | -5.27652800 | 0.31131700  | 3.94049600  |
| C | -5.20174700 | -1.68937900 | -1.01557100 |
| C | -6.46615400 | -0.96339600 | -1.59917800 |
| H | -6.32205300 | 0.11920700  | -1.50379700 |
| H | -7.38210400 | -1.22471300 | -1.06160700 |
| H | -7.39604900 | -2.90830900 | 0.56757300  |
| H | -6.17724900 | -3.90692800 | 1.35338000  |
| C | -2.88846800 | -1.67906700 | -2.30934700 |
| H | -4.99210700 | -1.49928600 | -5.56575400 |
| H | -6.43800300 | -1.80170400 | 3.34184100  |
| C | -6.49607000 | -1.35039800 | -3.09099400 |
| H | -6.97963100 | -0.59286700 | -3.71833700 |
| H | -7.04456700 | -2.28960000 | -3.25016800 |
| C | -6.31338600 | -3.02780600 | 0.71354200  |
| C | -5.56988100 | -3.15976800 | -0.63537300 |
| H | -4.64233800 | -3.72553900 | -0.49268100 |
| H | -6.15894000 | -3.66001900 | -1.41108000 |
| C | -3.60363300 | 1.79165800  | 2.47847400  |

|   |              |              |              |
|---|--------------|--------------|--------------|
| C | -2. 62614100 | 1. 81263200  | 3. 50182900  |
| C | -4. 06706200 | 3. 00726200  | 1. 91456800  |
| C | -2. 12866300 | 0. 61855800  | 4. 11575700  |
| C | -2. 09067700 | 3. 07721100  | 3. 95583300  |
| C | -3. 52912500 | 4. 26418300  | 2. 38368900  |
| C | -1. 17266100 | 0. 66680400  | 5. 09666900  |
| H | -2. 51108200 | -0. 33928100 | 3. 78542200  |
| C | -1. 10191500 | 3. 08363400  | 4. 98987000  |
| C | -2. 55372600 | 4. 26502400  | 3. 38462300  |
| C | -0. 65330900 | 1. 91472200  | 5. 54584500  |
| H | -0. 80025900 | -0. 25930200 | 5. 52425900  |
| H | -0. 71660500 | 4. 04358500  | 5. 32654900  |
| H | -2. 15396500 | 5. 21471000  | 3. 73508100  |
| H | 0. 09698000  | 1. 93430400  | 6. 33220800  |
| C | -0. 74378300 | -1. 84901600 | -3. 69084600 |
| C | -0. 01252200 | -0. 77904400 | -4. 26247300 |
| C | -0. 08243400 | -3. 04868700 | -3. 33135800 |
| C | -0. 61931500 | 0. 46595500  | -4. 63086100 |
| C | 1. 40683300  | -0. 92579900 | -4. 49452600 |
| C | 1. 34849700  | -3. 15806300 | -3. 51035600 |
| C | 0. 10048400  | 1. 45948000  | -5. 24256100 |
| H | -1. 66966100 | 0. 61787200  | -4. 41377300 |
| C | 2. 12145500  | 0. 13244600  | -5. 14022400 |
| C | 2. 05143700  | -2. 09971400 | -4. 09445100 |
| C | 1. 48748000  | 1. 28566700  | -5. 52064800 |
| H | -0. 38854800 | 2. 39002800  | -5. 51758000 |
| H | 3. 18242700  | -0. 00764400 | -5. 33474900 |
| H | 3. 12263100  | -2. 20095400 | -4. 25905500 |
| H | 2. 03675600  | 2. 07119700  | -6. 03320500 |
| C | -5. 54410500 | 4. 25343300  | 0. 41404900  |
| H | -6. 32873600 | 4. 26064200  | -0. 33815000 |
| C | -5. 09090000 | 3. 06019700  | 0. 91400900  |
| H | -5. 52368400 | 2. 13144100  | 0. 56018800  |
| C | -5. 00658800 | 5. 48771800  | 0. 87792200  |
| H | -5. 38374500 | 6. 42511200  | 0. 47707200  |
| C | -4. 02572300 | 5. 48675800  | 1. 83289100  |
| H | -3. 60854900 | 6. 42136900  | 2. 20074600  |
| C | -0. 10332200 | -5. 32903300 | -2. 45475300 |
| H | -0. 65455500 | -6. 17627700 | -2. 05623100 |
| C | 1. 31189200  | -5. 41209100 | -2. 58317200 |
| H | 1. 83192600  | -6. 31109600 | -2. 26602400 |
| C | 2. 01343200  | -4. 35855900 | -3. 10512600 |
| H | 3. 09344100  | -4. 41474200 | -3. 21598500 |
| C | -0. 77439500 | -4. 18973200 | -2. 81401300 |

|   |              |              |              |
|---|--------------|--------------|--------------|
| H | -1. 85105200 | -4. 14114200 | -2. 70032500 |
| C | 2. 18069100  | 3. 86682100  | -1. 25119300 |
| C | 2. 97930200  | 4. 10693700  | 0. 07488400  |
| H | 4. 02247900  | 3. 88918300  | -0. 16191900 |
| H | 2. 95465600  | 5. 19097500  | 0. 25085100  |
| C | 2. 58906500  | 3. 43197600  | 1. 39220700  |
| C | 2. 19770500  | 2. 37855900  | -1. 70457300 |
| H | 3. 20764100  | 2. 12638200  | -2. 01809800 |
| H | 1. 57465000  | 2. 26371000  | -2. 59570400 |
| N | 1. 75688400  | 1. 33838300  | -0. 76393400 |
| C | 2. 51110800  | 0. 42150600  | -0. 17924100 |
| N | 1. 95742200  | -0. 57430800 | 0. 51774000  |
| C | 2. 71949900  | -1. 62473200 | 1. 12878500  |
| C | 2. 93613900  | -1. 60140200 | 2. 50704600  |
| C | 3. 21774800  | -2. 66561700 | 0. 34572000  |
| C | 3. 69609200  | -2. 61038800 | 3. 09451800  |
| C | 3. 97441000  | -3. 67392000 | 0. 94755400  |
| H | 3. 00735300  | -2. 69047600 | -0. 71797400 |
| C | 4. 22201600  | -3. 64591500 | 2. 31908500  |
| H | 4. 82600100  | -4. 41842000 | 2. 77997800  |
| C | 4. 48269500  | -4. 81760000 | 0. 10744200  |
| C | 3. 92812600  | -2. 59486400 | 4. 58472900  |
| F | 5. 55028900  | -5. 41919700 | 0. 67231700  |
| F | 4. 85642500  | -4. 39916300 | -1. 12504700 |
| F | 3. 53804600  | -5. 76709000 | -0. 07113500 |
| F | 3. 95233600  | -1. 33161700 | 5. 06642800  |
| F | 5. 10679500  | -3. 17515400 | 4. 90531500  |
| F | 2. 96408900  | -3. 25876100 | 5. 25032300  |
| S | 4. 29080800  | 0. 37677400  | -0. 27271600 |
| H | 2. 51308000  | -0. 80285500 | 3. 10327800  |
| H | 0. 91696000  | -0. 60949700 | 0. 64840400  |
| H | 0. 73572600  | 1. 12480100  | -0. 77383200 |
| C | 3. 52500100  | 2. 97834900  | 2. 26119600  |
| H | 4. 44674300  | 1. 67174400  | -0. 59724900 |
| N | -0. 87847200 | -0. 90025800 | 0. 94149000  |
| S | -1. 12889800 | -2. 12118000 | 1. 95925800  |
| O | -2. 52017400 | -2. 32056800 | 2. 38105900  |
| O | -0. 06654600 | -2. 06463500 | 2. 97266800  |
| C | -0. 72630900 | -3. 68914000 | 0. 99603200  |
| F | 0. 29484000  | -3. 46766800 | 0. 15142700  |
| F | -1. 78082800 | -4. 12157500 | 0. 29810500  |
| F | -0. 36698100 | -4. 64624200 | 1. 85764000  |
| C | 0. 76269300  | 4. 47833600  | -1. 21432300 |
| C | 0. 60453100  | 5. 83180300  | -0. 86191800 |

|   |             |            |             |
|---|-------------|------------|-------------|
| C | -0.39226200 | 3.77151100 | -1.57552700 |
| C | -0.64505900 | 6.44719100 | -0.86249400 |
| H | 1.46789800  | 6.42640600 | -0.57625000 |
| C | -1.65003500 | 4.38172700 | -1.56295300 |
| H | -0.35942500 | 2.72400300 | -1.84617800 |
| C | -1.78526500 | 5.72174700 | -1.21164200 |
| H | -0.72579700 | 7.49492400 | -0.58354000 |
| H | -2.52500700 | 3.78902800 | -1.81347300 |
| H | -2.76472000 | 6.18933100 | -1.19295800 |
| C | 2.93233300  | 4.65941400 | -2.41476700 |
| H | 2.32158500  | 4.53064600 | -3.31759100 |
| H | 2.85275200  | 5.71798200 | -2.16278800 |
| C | 4.37690300  | 4.31474000 | -2.75878700 |
| C | 5.44303200  | 4.98983700 | -2.27099900 |
| C | 1.11567500  | 3.47375000 | 1.73465300  |
| H | 0.74008500  | 4.50116500 | 1.65447300  |
| H | 0.50645900  | 2.88290100 | 1.04332300  |
| H | 0.89558800  | 3.12670900 | 2.74307700  |
| C | 4.57504800  | 3.22311900 | -3.80879000 |
| H | 5.12599000  | 2.35118900 | -3.43027700 |
| H | 3.61862400  | 2.85413200 | -4.18690900 |
| H | 5.13866500  | 3.59606600 | -4.67260900 |
| C | 3.20630600  | 2.36185900 | 3.61016200  |
| H | 3.50831900  | 3.03550100 | 4.42569800  |
| H | 2.15472700  | 2.11565700 | 3.75959100  |
| H | 3.78546800  | 1.43887000 | 3.75265100  |
| C | 6.86541300  | 4.66152600 | -2.67348800 |
| H | 7.51889700  | 4.63521500 | -1.79125300 |
| H | 6.96727600  | 3.70641700 | -3.19193100 |
| H | 7.27175200  | 5.44324000 | -3.33204600 |
| C | 5.37681200  | 6.16482600 | -1.32181100 |
| H | 5.98709000  | 6.99224300 | -1.70908700 |
| H | 4.36877900  | 6.54596400 | -1.15338400 |
| H | 5.79945800  | 5.90530300 | -0.34091300 |
| C | 5.02614400  | 3.07969700 | 2.06976400  |
| H | 5.49897200  | 2.09071100 | 2.14106100  |
| H | 5.34529300  | 3.53942200 | 1.13246100  |
| H | 5.45827700  | 3.68179600 | 2.88201300  |

INT-16' -4

0 imaginary frequency

H = -5472.486565

G = -5472.704679

E(M06-2X-DCM) = -5473.466307

|   |             |             |             |
|---|-------------|-------------|-------------|
| O | -1.28368700 | 1.51297500  | 1.22771100  |
| O | -3.30483600 | -0.11348200 | 0.98509800  |
| P | -1.68462000 | -0.00580900 | 0.71335200  |
| O | -1.01578500 | -1.09499900 | 1.46566600  |
| C | -2.32279600 | 2.63259600  | 5.13944800  |
| C | -3.22108900 | 2.78278700  | 4.09008000  |
| C | -2.86039700 | 2.44522700  | 2.77620000  |
| C | -0.65890000 | 1.76502100  | 3.56894200  |
| C | -1.04858100 | 2.14454000  | 4.86531900  |
| C | -4.23077800 | 0.65328400  | 0.28121900  |
| C | -4.35255600 | 2.01338400  | 0.56656200  |
| C | -5.08771400 | 2.83916400  | -0.29500000 |
| C | -5.85407100 | 2.28191000  | -1.31354900 |
| C | -5.89065700 | 0.89377100  | -1.44490800 |
| C | -5.07304200 | 0.04334000  | -0.67582700 |
| H | -0.32495500 | 2.04029600  | 5.66856200  |
| H | -6.55521800 | 0.44272600  | -2.17518200 |
| C | -3.98426300 | 2.81054200  | 1.81371200  |
| C | -5.20925000 | 2.78418900  | 2.79856000  |
| H | -5.55460300 | 1.74884700  | 2.90003300  |
| H | -6.05026100 | 3.37922200  | 2.43092600  |
| H | -5.87320600 | 4.71216600  | 0.48150400  |
| H | -4.63070200 | 4.92049300  | -0.74670900 |
| C | -1.60018100 | 1.89652200  | 2.52885300  |
| H | -2.60467000 | 2.89132400  | 6.15693500  |
| H | -6.45066700 | 2.90838200  | -1.97216900 |
| C | -4.64906800 | 3.27189800  | 4.14653800  |
| H | -5.19943000 | 2.87448900  | 5.00699200  |
| H | -4.68806700 | 4.36790600  | 4.22430800  |
| C | -4.93106200 | 4.29381200  | 0.10135900  |
| C | -3.84365300 | 4.24081800  | 1.20342400  |
| H | -2.85067100 | 4.34311500  | 0.75553300  |
| H | -3.95608100 | 5.02817100  | 1.95610700  |
| C | -5.19399200 | -1.44002900 | -0.83769600 |
| C | -5.02154300 | -2.04315800 | -2.11117200 |
| C | -5.58244300 | -2.23882700 | 0.27228500  |
| C | -4.65152900 | -1.30710600 | -3.28197800 |
| C | -5.20674000 | -3.46858500 | -2.26240500 |
| C | -5.73889400 | -3.66645700 | 0.10753000  |
| C | -4.50215400 | -1.91659400 | -4.49981000 |
| H | -4.46418700 | -0.24646200 | -3.19207900 |
| C | -5.04198500 | -4.06782100 | -3.55053300 |
| C | -5.54424500 | -4.24093400 | -1.15028400 |
| C | -4.70676300 | -3.31736700 | -4.64366100 |

|   |             |             |             |
|---|-------------|-------------|-------------|
| H | -4.20840100 | -1.32581900 | -5.36354900 |
| H | -5.18996100 | -5.14182100 | -3.63779100 |
| H | -5.67031700 | -5.31550700 | -1.26823400 |
| H | -4.58432400 | -3.78507000 | -5.61700700 |
| C | 0.76664700  | 1.32053100  | 3.41878200  |
| C | 1.16617700  | 0.05283400  | 3.90265200  |
| C | 1.73997200  | 2.26333500  | 3.00585700  |
| C | 0.22359700  | -0.94099700 | 4.32105300  |
| C | 2.57367000  | -0.26308300 | 4.00740800  |
| C | 3.14457500  | 1.94569800  | 3.13429800  |
| C | 0.63835200  | -2.14753600 | 4.81915500  |
| H | -0.83291600 | -0.73471100 | 4.20831900  |
| C | 2.96352200  | -1.53399800 | 4.53607700  |
| C | 3.52253700  | 0.69322700  | 3.63013400  |
| C | 2.02562300  | -2.44796300 | 4.93632200  |
| H | -0.09639400 | -2.88925700 | 5.11890400  |
| H | 4.02503700  | -1.75185000 | 4.62666400  |
| H | 4.58096300  | 0.47116900  | 3.76368200  |
| H | 2.33465900  | -3.40681400 | 5.34409700  |
| C | -6.25218800 | -2.49813700 | 2.61344600  |
| H | -6.47201300 | -2.05120000 | 3.57952400  |
| C | -5.87851200 | -1.69843000 | 1.56519700  |
| H | -5.81976400 | -0.62708500 | 1.71252000  |
| C | -6.36163300 | -3.90765500 | 2.45245800  |
| H | -6.65129800 | -4.52788600 | 3.29659700  |
| C | -6.11617600 | -4.46916800 | 1.22946000  |
| H | -6.21291800 | -5.54236700 | 1.08104600  |
| C | 2.35557200  | 4.46999300  | 2.15292700  |
| H | 2.05929400  | 5.43748100  | 1.75855700  |
| C | 3.73706300  | 4.16233800  | 2.30585000  |
| H | 4.48674800  | 4.90463300  | 2.04497200  |
| C | 4.11540100  | 2.93542200  | 2.78163400  |
| H | 5.16859000  | 2.69284000  | 2.90947800  |
| C | 1.39358700  | 3.55633600  | 2.49795200  |
| H | 0.34669500  | 3.80864100  | 2.37892000  |
| C | 3.74317000  | -3.73482200 | -0.45339400 |
| C | 4.00857800  | -3.93781700 | -1.99582200 |
| H | 5.03574500  | -3.60652300 | -2.17254500 |
| H | 4.02487300  | -5.02319000 | -2.16080900 |
| C | 3.08297500  | -3.33365200 | -3.04334600 |
| C | 3.95727500  | -2.25815500 | -0.04793300 |
| H | 4.97995300  | -1.97918700 | -0.31750500 |
| H | 3.86524500  | -2.16922900 | 1.04109900  |
| N | 3.05406100  | -1.28908700 | -0.68688300 |

|   |             |             |             |
|---|-------------|-------------|-------------|
| C | 3.26866100  | 0.01119500  | -0.82220100 |
| N | 2.39483400  | 0.74851900  | -1.52016300 |
| C | 2.34235400  | 2.16401600  | -1.66017100 |
| C | 3.42082700  | 2.88165400  | -2.18052500 |
| C | 1.14716100  | 2.81405500  | -1.33215800 |
| C | 3.31896000  | 4.26497600  | -2.33065200 |
| C | 1.05541400  | 4.19394100  | -1.51234400 |
| H | 0.30729200  | 2.24662300  | -0.94031500 |
| C | 2.13759400  | 4.92693500  | -2.00143800 |
| H | 2.05753500  | 5.99932100  | -2.13365300 |
| C | -0.21428300 | 4.91145600  | -1.12386300 |
| C | 4.46507600  | 5.03373600  | -2.93693700 |
| F | -0.22142900 | 5.23966100  | 0.19336600  |
| F | -1.30441500 | 4.15459500  | -1.34589100 |
| F | -0.36291600 | 6.06438900  | -1.81150600 |
| F | 5.65290200  | 4.44792700  | -2.66912700 |
| F | 4.51639800  | 6.29896800  | -2.47090900 |
| F | 4.35513900  | 5.10904100  | -4.28157500 |
| S | 4.69673200  | 0.80219400  | -0.13233600 |
| H | 4.32645600  | 2.37137300  | -2.48920100 |
| H | 1.56070100  | 0.21386600  | -1.83884800 |
| H | 2.15425900  | -1.62657700 | -1.04773500 |
| C | 3.43838200  | -2.29330000 | -3.83118000 |
| H | 4.75363800  | -0.00164400 | 0.94810000  |
| N | -1.38973300 | 0.22953600  | -0.87747800 |
| S | -0.97130900 | -0.88173500 | -1.90227700 |
| O | -1.79166800 | -2.08625700 | -2.01553200 |
| O | 0.51629200  | -1.13806600 | -1.93954800 |
| C | -1.15422300 | 0.09719500  | -3.48855300 |
| F | -0.17176900 | 1.01784600  | -3.57079700 |
| F | -2.32335100 | 0.72930600  | -3.57261500 |
| F | -1.03348100 | -0.73699500 | -4.52820600 |
| C | 2.37896600  | -4.29729700 | -0.01506000 |
| C | 2.07039700  | -5.64275100 | -0.28957700 |
| C | 1.41511300  | -3.54418100 | 0.67010900  |
| C | 0.85441300  | -6.20252000 | 0.09329800  |
| H | 2.78635900  | -6.26865000 | -0.81555200 |
| C | 0.18434500  | -4.09532700 | 1.04336100  |
| H | 1.58229500  | -2.50541200 | 0.93327800  |
| C | -0.09947300 | -5.42753900 | 0.75769500  |
| H | 0.64895000  | -7.24490400 | -0.13740000 |
| H | -0.53960400 | -3.45319000 | 1.53364300  |
| H | -1.05649700 | -5.85732000 | 1.04006700  |
| C | 4.91873800  | -4.52958300 | 0.25229600  |

|   |            |             |             |
|---|------------|-------------|-------------|
| H | 4.74286100 | -5.59121900 | 0.04347900  |
| H | 5.83663400 | -4.27256500 | -0.28218000 |
| C | 5.12294500 | -4.36961300 | 1.75131600  |
| C | 6.15915300 | -3.67901700 | 2.28128100  |
| C | 1.76049900 | -4.04849600 | -3.24502200 |
| H | 1.00803600 | -3.74900500 | -2.50717900 |
| H | 1.33564400 | -3.85608900 | -4.23254500 |
| H | 1.88888600 | -5.13228100 | -3.14412300 |
| C | 4.11066300 | -5.10143100 | 2.61849200  |
| H | 3.70017600 | -5.96418600 | 2.08621200  |
| H | 4.54758700 | -5.46941500 | 3.55046300  |
| H | 3.25513000 | -4.46584700 | 2.87848000  |
| C | 2.52144900 | -1.76917100 | -4.92677700 |
| H | 2.91046000 | -0.83473800 | -5.34577900 |
| H | 2.43743500 | -2.48060400 | -5.75979800 |
| H | 1.50879400 | -1.57163800 | -4.56457900 |
| C | 6.39470500 | -3.54536200 | 3.77169500  |
| H | 7.31287900 | -4.07274100 | 4.06920700  |
| H | 6.55090700 | -2.49131300 | 4.04137200  |
| H | 5.57691100 | -3.92281000 | 4.38616400  |
| C | 4.74954600 | -1.54358600 | -3.75741400 |
| H | 4.57274700 | -0.47912300 | -3.54392800 |
| H | 5.45043900 | -1.91625700 | -3.00785800 |
| H | 5.25947400 | -1.57218200 | -4.73077200 |
| C | 7.23491400 | -2.96200600 | 1.49202100  |
| H | 7.18280000 | -3.10476600 | 0.41149800  |
| H | 7.20430500 | -1.87928600 | 1.68535800  |
| H | 8.22952500 | -3.29560300 | 1.81941100  |

INT-16' -5

0 imaginary frequency

H = -5472.499956

G = -5472.718673

E(M06-2X-DCM) = -5473.479546

|   |            |             |             |
|---|------------|-------------|-------------|
| O | 1.82553800 | -2.70954600 | -0.23661400 |
| O | 3.32125100 | -0.59758500 | -0.08394200 |
| P | 1.77029600 | -1.09605000 | 0.08065200  |
| O | 1.32986800 | -0.76459300 | 1.45884400  |
| C | 3.97025700 | -4.91938400 | 2.59957400  |
| C | 4.61575300 | -4.33823100 | 1.51313100  |
| C | 3.88344200 | -3.66452100 | 0.52463600  |
| C | 1.82184200 | -4.10775400 | 1.75271400  |
| C | 2.58133600 | -4.82365000 | 2.69293900  |
| C | 4.03932400 | -0.79890700 | -1.25638000 |



|   |              |              |              |
|---|--------------|--------------|--------------|
| C | 4. 59015400  | -2. 05248600 | -1. 52541200 |
| C | 5. 17350500  | -2. 28633300 | -2. 78057600 |
| C | 5. 32146900  | -1. 25282000 | -3. 69964200 |
| C | 4. 89055100  | 0. 02752800  | -3. 35296700 |
| C | 4. 23391600  | 0. 28429200  | -2. 13749000 |
| H | 2. 06152500  | -5. 29340100 | 3. 52306500  |
| H | 5. 04530500  | 0. 85425700  | -4. 04004900 |
| C | 4. 79587100  | -3. 27520600 | -0. 63243000 |
| C | 6. 16859400  | -3. 18730900 | 0. 12004600  |
| H | 6. 24357100  | -2. 20375700 | 0. 59808100  |
| H | 7. 02342400  | -3. 29639300 | -0. 55475100 |
| H | 6. 66269200  | -3. 86231400 | -2. 86122100 |
| H | 5. 26087000  | -4. 16808400 | -3. 88069000 |
| C | 2. 50922100  | -3. 50224700 | 0. 68374700  |
| H | 4. 53415200  | -5. 44378200 | 3. 36708500  |
| H | 5. 78225800  | -1. 43060000 | -4. 66818800 |
| C | 6. 09592300  | -4. 28501600 | 1. 20366200  |
| H | 6. 70275700  | -4. 04936600 | 2. 08546400  |
| H | 6. 45815400  | -5. 24968700 | 0. 82056300  |
| C | 5. 57197000  | -3. 74006600 | -2. 92066500 |
| C | 4. 86416500  | -4. 40083000 | -1. 71731300 |
| H | 3. 84211600  | -4. 68155500 | -1. 99627200 |
| H | 5. 37131100  | -5. 30055500 | -1. 35451200 |
| C | 3. 83119400  | 1. 68742200  | -1. 80597700 |
| C | 2. 89322300  | 2. 36976200  | -2. 62000000 |
| C | 4. 46714500  | 2. 36930700  | -0. 73643400 |
| C | 2. 18914800  | 1. 73130900  | -3. 69100000 |
| C | 2. 60662000  | 3. 76480200  | -2. 37062800 |
| C | 4. 14189400  | 3. 75393000  | -0. 47656500 |
| C | 1. 31304900  | 2. 42513300  | -4. 48400500 |
| H | 2. 33681200  | 0. 67157100  | -3. 85247800 |
| C | 1. 69077500  | 4. 45483300  | -3. 22593400 |
| C | 3. 22880700  | 4. 41534600  | -1. 30236200 |
| C | 1. 07072800  | 3. 81091100  | -4. 26258900 |
| H | 0. 78484200  | 1. 90864100  | -5. 28047400 |
| H | 1. 50366600  | 5. 50899900  | -3. 03329200 |
| H | 2. 99422500  | 5. 45971900  | -1. 10802100 |
| H | 0. 38353200  | 4. 34825000  | -4. 91084000 |
| C | 0. 33275700  | -4. 05879800 | 1. 90303600  |
| C | -0. 25253500 | -3. 33459800 | 2. 96877300  |
| C | -0. 48013200 | -4. 82149800 | 1. 02963800  |
| C | 0. 51288600  | -2. 51633700 | 3. 86126000  |
| C | -1. 68206600 | -3. 39638200 | 3. 17410400  |
| C | -1. 90968600 | -4. 85996200 | 1. 23606200  |

|   |             |             |             |
|---|-------------|-------------|-------------|
| C | -0.08100800 | -1.83921600 | 4.89380900  |
| H | 1.57564100  | -2.40839200 | 3.68628100  |
| C | -2.26118900 | -2.68090400 | 4.26923700  |
| C | -2.46983300 | -4.15363100 | 2.30363700  |
| C | -1.48614100 | -1.92925800 | 5.11041700  |
| H | 0.52347100  | -1.21163200 | 5.54264100  |
| H | -3.33688800 | -2.75020300 | 4.41683000  |
| H | -3.54573700 | -4.19866200 | 2.46318800  |
| H | -1.93869200 | -1.39208400 | 5.94039000  |
| C | 6.04129100  | 2.44068500  | 1.13500300  |
| H | 6.78204600  | 1.94535900  | 1.75677900  |
| C | 5.45306300  | 1.75755600  | 0.10316500  |
| H | 5.73933800  | 0.73035300  | -0.08801600 |
| C | 5.69481200  | 3.79511300  | 1.40267300  |
| H | 6.17064000  | 4.32061300  | 2.22656600  |
| C | 4.77548800  | 4.43146400  | 0.61290700  |
| H | 4.50305400  | 5.46709200  | 0.80019700  |
| C | -0.75789900 | -6.33041000 | -0.87440400 |
| H | -0.32362200 | -6.90550600 | -1.68794800 |
| C | -2.16741000 | -6.35371800 | -0.67439400 |
| H | -2.79597800 | -6.94544400 | -1.33486300 |
| C | -2.72198400 | -5.64036400 | 0.35446200  |
| H | -3.79610700 | -5.65698700 | 0.52546100  |
| C | 0.05347500  | -5.59447500 | -0.05108300 |
| H | 1.12523200  | -5.59490900 | -0.21386500 |
| N | 0.98944200  | -0.46974400 | -1.21100100 |
| S | -0.51507200 | -0.74850800 | -1.54126900 |
| O | -1.25067500 | 0.54693100  | -1.77709000 |
| O | -1.23705600 | -1.72544800 | -0.71005600 |
| C | -0.48137400 | -1.48739000 | -3.25623400 |
| F | 0.13255400  | -0.67514700 | -4.12532400 |
| F | -1.73984900 | -1.68496600 | -3.67422600 |
| F | 0.15765600  | -2.65769300 | -3.23003200 |
| C | -5.73456400 | 0.75368100  | -0.83155700 |
| C | -5.74773000 | 1.94023900  | -1.86895300 |
| H | -6.08756900 | 2.82324200  | -1.32064700 |
| H | -6.55080000 | 1.71705700  | -2.58363400 |
| C | -4.49500100 | 2.27276600  | -2.66612900 |
| C | -4.79479600 | 1.06407400  | 0.35799800  |
| H | -5.17721900 | 1.97069700  | 0.83704700  |
| H | -4.86013400 | 0.25634600  | 1.09427100  |
| N | -3.37717300 | 1.30831100  | 0.04168500  |
| C | -2.53801700 | 1.94966900  | 0.84059200  |
| N | -1.26315300 | 2.13526200  | 0.47813000  |

|   |             |             |             |
|---|-------------|-------------|-------------|
| C | -0.24725100 | 2.80059700  | 1.24489500  |
| C | -0.03852800 | 4.16843000  | 1.05387000  |
| C | 0.56019100  | 2.06463700  | 2.11680300  |
| C | 0.97882500  | 4.81013800  | 1.76075700  |
| C | 1.57254500  | 2.72471400  | 2.81711800  |
| H | 0.44264200  | 0.98773300  | 2.20271200  |
| C | 1.78208200  | 4.09291000  | 2.64809000  |
| H | 2.57664200  | 4.59131700  | 3.18874100  |
| C | 2.48439000  | 1.92734600  | 3.72226400  |
| C | 1.17359200  | 6.29302900  | 1.58204300  |
| F | 1.79614600  | 0.98916100  | 4.40580200  |
| F | 3.45319300  | 1.30574300  | 3.03316700  |
| F | 3.08720600  | 2.72951300  | 4.63418000  |
| F | 0.29520700  | 7.00285900  | 2.32648300  |
| F | 2.41232300  | 6.68996200  | 1.94367900  |
| F | 0.98533000  | 6.66640800  | 0.29515500  |
| S | -3.17090000 | 2.55406600  | 2.38000200  |
| H | -0.65114500 | 4.71612800  | 0.34557300  |
| H | -0.98628200 | 1.65550100  | -0.40058100 |
| H | -2.96506800 | 0.91846500  | -0.81299300 |
| C | -3.75639900 | 3.38592500  | -2.45860800 |
| H | -1.98979200 | 3.06040100  | 2.78643700  |
| C | -7.19004800 | 0.74791500  | -0.20101500 |
| H | -7.87967500 | 0.48775400  | -1.01228500 |
| H | -7.42178200 | 1.78326300  | 0.06312800  |
| C | -5.45434400 | -0.60060500 | -1.50458000 |
| C | -4.43143000 | -1.46506600 | -1.09489700 |
| C | -6.27719800 | -1.02748500 | -2.56395400 |
| C | -4.22529500 | -2.69907700 | -1.72198800 |
| H | -3.75738200 | -1.20488000 | -0.28701000 |
| C | -6.08485900 | -2.25901400 | -3.18381900 |
| H | -7.08594200 | -0.39202500 | -2.91437600 |
| C | -5.05348500 | -3.10332200 | -2.76490300 |
| H | -3.40505800 | -3.32579300 | -1.38813800 |
| H | -6.74064200 | -2.55756900 | -3.99785800 |
| H | -4.89565900 | -4.06167700 | -3.25207100 |
| C | -7.46803800 | -0.17303900 | 0.97988600  |
| C | -7.57031000 | 0.27462300  | 2.25292500  |
| C | -7.68034800 | -1.63192600 | 0.61225400  |
| H | -6.73354100 | -2.17397200 | 0.50046300  |
| H | -8.28883800 | -2.16753200 | 1.34366800  |
| H | -8.18868200 | -1.70972100 | -0.35481100 |
| C | -7.83875200 | -0.62733700 | 3.44032800  |
| H | -8.83346800 | -0.42792200 | 3.86476600  |

|   |             |             |             |
|---|-------------|-------------|-------------|
| H | -7.77507000 | -1.69233500 | 3.21579500  |
| H | -7.11711500 | -0.41872200 | 4.24189800  |
| C | -4.14457200 | 1.31932400  | -3.79533600 |
| H | -5.04358600 | 0.84557500  | -4.20096900 |
| H | -3.64164700 | 1.83533300  | -4.61802600 |
| H | -3.47964600 | 0.50894300  | -3.47230200 |
| C | -2.52695200 | 3.68402300  | -3.30164700 |
| H | -1.97172300 | 4.53806300  | -2.90010200 |
| H | -1.83672200 | 2.83501900  | -3.33784600 |
| H | -2.79355800 | 3.93460900  | -4.33804900 |
| C | -4.02789000 | 4.44101800  | -1.41096200 |
| H | -4.10702000 | 5.43070100  | -1.88210700 |
| H | -4.93495500 | 4.28271100  | -0.82436900 |
| H | -3.18742900 | 4.51066300  | -0.70461400 |
| C | -7.43782600 | 1.71985800  | 2.68688600  |
| H | -7.41654900 | 2.44222300  | 1.86879500  |
| H | -8.27673000 | 1.99240400  | 3.34177800  |
| H | -6.52676800 | 1.86641600  | 3.28527400  |

INT-16' -6

0 imaginary frequency

H = -5472.500134

G = -5472.715926

E(M06-2X-DCM) = -5473.479127

|   |             |             |             |
|---|-------------|-------------|-------------|
| O | -2.30475200 | -2.60852000 | 0.38269200  |
| O | -2.97757200 | -0.13876200 | 0.68588100  |
| P | -1.66634900 | -1.11639600 | 0.60394400  |
| O | -0.83587200 | -0.66186800 | -0.55807700 |
| C | -5.22958400 | -3.38976700 | -2.51254000 |
| C | -5.58189100 | -2.90121400 | -1.25916500 |
| C | -4.60821200 | -2.66791900 | -0.27516200 |
| C | -2.87574900 | -3.35740400 | -1.85256800 |
| C | -3.88484200 | -3.62625900 | -2.79202000 |
| C | -3.77222000 | -0.19089000 | 1.83415300  |
| C | -4.65822800 | -1.24839700 | 2.01899700  |
| C | -5.23120600 | -1.44004600 | 3.28553800  |
| C | -5.04502600 | -0.50086300 | 4.29506100  |
| C | -4.29890700 | 0.64876700  | 4.02414400  |
| C | -3.63842600 | 0.82559400  | 2.79832900  |
| H | -3.59291400 | -4.01015800 | -3.76529700 |
| H | -4.19808900 | 1.42040600  | 4.78192900  |
| C | -5.27002400 | -2.23841900 | 1.03159300  |
| C | -6.61545400 | -1.65032900 | 0.47289300  |
| H | -6.43756200 | -0.61883500 | 0.14730200  |

|   |             |             |             |
|---|-------------|-------------|-------------|
| H | -7.40642900 | -1.62880700 | 1.22840800  |
| H | -7.08451200 | -2.57465900 | 3.36227600  |
| H | -5.74588100 | -3.35065700 | 4.20010800  |
| C | -3.26398400 | -2.86503600 | -0.59098100 |
| H | -5.98701500 | -3.57612800 | -3.26971500 |
| H | -5.48926700 | -0.64312400 | 5.27702300  |
| C | -6.95407200 | -2.52324300 | -0.75069600 |
| H | -7.55177600 | -1.99234700 | -1.50031900 |
| H | -7.52892700 | -3.41424200 | -0.46016100 |
| C | -5.99979900 | -2.74601700 | 3.32188900  |
| C | -5.58399600 | -3.42773200 | 1.99498300  |
| H | -4.66928700 | -4.01177000 | 2.14618900  |
| H | -6.35069100 | -4.09968400 | 1.59549500  |
| C | -2.89408800 | 2.09257800  | 2.50995100  |
| C | -1.70973800 | 2.41771800  | 3.21349800  |
| C | -3.43186800 | 3.00385200  | 1.56400400  |
| C | -1.09722500 | 1.52396700  | 4.15007000  |
| C | -1.05985900 | 3.68765600  | 2.97160100  |
| C | -2.75843500 | 4.25863300  | 1.31659200  |
| C | 0.05007700  | 1.86759900  | 4.81651100  |
| H | -1.53092900 | 0.54333500  | 4.30144500  |
| C | 0.12544100  | 4.01469900  | 3.70311200  |
| C | -1.59452000 | 4.56700200  | 2.02693100  |
| C | 0.66348500  | 3.13517100  | 4.60448200  |
| H | 0.50732900  | 1.15246800  | 5.49283100  |
| H | 0.58613600  | 4.98464600  | 3.52748700  |
| H | -1.09055700 | 5.51135300  | 1.83359400  |
| H | 1.56408200  | 3.39537000  | 5.15481700  |
| C | -1.44985400 | -3.60365900 | -2.23303500 |
| C | -0.83939200 | -2.78941200 | -3.21769100 |
| C | -0.73954800 | -4.68773800 | -1.66548000 |
| C | -1.49482600 | -1.65984700 | -3.80811900 |
| C | 0.50916800  | -3.08011200 | -3.64877700 |
| C | 0.61523900  | -4.95566200 | -2.09131600 |
| C | -0.88100400 | -0.89531400 | -4.76712600 |
| H | -2.49298800 | -1.39918800 | -3.47528200 |
| C | 1.11192400  | -2.26089200 | -4.65511500 |
| C | 1.19857400  | -4.15121200 | -3.07391100 |
| C | 0.43989400  | -1.20215000 | -5.20419700 |
| H | -1.40139900 | -0.03814300 | -5.18556500 |
| H | 2.12291200  | -2.50293900 | -4.97633800 |
| H | 2.21454200  | -4.36598100 | -3.40081200 |
| H | 0.90910100  | -0.59086300 | -5.97072200 |
| C | -5.13059500 | 3.64984800  | -0.07557100 |

|   |             |             |             |
|---|-------------|-------------|-------------|
| H | -6.04933200 | 3.42760300  | -0.61173700 |
| C | -4.64122300 | 2.75276300  | 0.83798500  |
| H | -5.18146600 | 1.83187700  | 1.02406700  |
| C | -4.45173500 | 4.87542200  | -0.32680800 |
| H | -4.85510600 | 5.57533600  | -1.05384200 |
| C | -3.30201300 | 5.16911000  | 0.35586300  |
| H | -2.77238300 | 6.10101400  | 0.17801700  |
| C | -0.59411400 | -6.59142000 | -0.14107500 |
| H | -1.05079700 | -7.23144200 | 0.60895400  |
| C | 0.74615800  | -6.84132700 | -0.55287300 |
| H | 1.29939100  | -7.66653000 | -0.11249500 |
| C | 1.32796200  | -6.04723700 | -1.50350700 |
| H | 2.34783700  | -6.23269000 | -1.83307100 |
| C | -1.31082100 | -5.55633900 | -0.68125700 |
| H | -2.33178500 | -5.38320900 | -0.36074600 |
| N | -1.05140300 | -1.23028700 | 2.09150900  |
| S | 0.45125600  | -1.43295500 | 2.50004200  |
| O | 0.62104600  | -1.38968100 | 3.95215100  |
| O | 1.42429000  | -0.65150700 | 1.68536700  |
| C | 0.85942000  | -3.19892000 | 2.02892300  |
| F | 0.01507200  | -4.05442300 | 2.60274400  |
| F | 2.11208700  | -3.50253700 | 2.42248100  |
| F | 0.79733600  | -3.34353600 | 0.69819200  |
| C | 5.55698000  | 0.19156600  | 0.29123000  |
| C | 5.70830500  | 1.75664400  | 0.30030200  |
| H | 5.91320900  | 2.04565000  | -0.73560100 |
| H | 6.65086900  | 1.96355500  | 0.82617600  |
| C | 4.64214700  | 2.68724900  | 0.88877100  |
| C | 4.36555700  | -0.28346400 | -0.59417900 |
| H | 4.62153200  | -0.10259200 | -1.63751000 |
| H | 4.25532100  | -1.36621800 | -0.49833400 |
| N | 3.03422500  | 0.29942400  | -0.36971300 |
| C | 2.34657500  | 1.06644100  | -1.20299500 |
| N | 1.02616600  | 1.20650400  | -1.05348900 |
| C | 0.21756100  | 2.23827700  | -1.61676600 |
| C | 0.55609000  | 3.58350800  | -1.46032400 |
| C | -0.96379100 | 1.87620200  | -2.26758400 |
| C | -0.26795800 | 4.56642000  | -2.00681300 |
| C | -1.78695700 | 2.87271400  | -2.78945300 |
| H | -1.22976300 | 0.82925500  | -2.34263500 |
| C | -1.44284700 | 4.21945800  | -2.67464500 |
| H | -2.08618300 | 4.98701500  | -3.08640700 |
| C | -3.02806800 | 2.47451300  | -3.54588800 |
| C | 0.09113700  | 6.01503300  | -1.80842500 |

|   |             |             |             |
|---|-------------|-------------|-------------|
| F | -3.57063300 | 1.33904200  | -3.06619400 |
| F | -3.97330900 | 3.43660200  | -3.50530300 |
| F | -2.75052500 | 2.25248800  | -4.85838300 |
| F | -0.31445400 | 6.48044400  | -0.60081300 |
| F | 1.43211000  | 6.20713300  | -1.86101500 |
| F | -0.46886000 | 6.80742300  | -2.74372400 |
| S | 3.08212600  | 1.85982900  | -2.61440500 |
| H | 1.45034900  | 3.85833900  | -0.91467300 |
| H | 0.47590000  | 0.43336200  | -0.60741200 |
| H | 2.49189000  | -0.05940900 | 0.43204700  |
| C | 4.39302900  | 3.90368700  | 0.34574600  |
| H | 4.29281400  | 2.04816800  | -2.06077000 |
| C | 6.84635300  | -0.33074800 | -0.47779900 |
| H | 7.71209200  | -0.05925000 | 0.13748200  |
| H | 6.93229300  | 0.26389100  | -1.39195200 |
| C | 5.56389400  | -0.39349000 | 1.71790900  |
| C | 4.60303200  | -1.29465000 | 2.19067500  |
| C | 6.60656000  | -0.04537700 | 2.59727100  |
| C | 4.66304400  | -1.81128400 | 3.48899300  |
| H | 3.76890600  | -1.60349900 | 1.57420600  |
| C | 6.67804400  | -0.56404600 | 3.88804500  |
| H | 7.38342900  | 0.64369700  | 2.27781800  |
| C | 5.70022200  | -1.45034700 | 4.34406500  |
| H | 3.88093400  | -2.48451100 | 3.82302000  |
| H | 7.49823200  | -0.27073900 | 4.53838700  |
| H | 5.74576200  | -1.84919100 | 5.35359700  |
| C | 6.93593500  | -1.81439100 | -0.80848600 |
| C | 6.72419600  | -2.30676200 | -2.05076000 |
| C | 7.34249700  | -2.71250700 | 0.35010700  |
| H | 7.95418800  | -2.15833200 | 1.06838700  |
| H | 6.47941400  | -3.08851000 | 0.91289100  |
| H | 7.92710200  | -3.57506800 | 0.02078400  |
| C | 6.79477100  | -3.78425500 | -2.37818900 |
| H | 5.91917300  | -4.08033500 | -2.97179700 |
| H | 7.67496100  | -4.00710200 | -2.99889400 |
| H | 6.82690200  | -4.43134300 | -1.50100600 |
| C | 4.02730500  | 2.26462000  | 2.20655300  |
| H | 3.37574600  | 3.02738100  | 2.63171500  |
| H | 3.44106200  | 1.34381700  | 2.13297900  |
| H | 4.81538500  | 2.06088800  | 2.94141700  |
| C | 3.41626900  | 4.90301400  | 0.94471000  |
| H | 2.96523400  | 5.51633300  | 0.15555300  |
| H | 2.60204800  | 4.44464100  | 1.50980600  |
| H | 3.93275500  | 5.60205500  | 1.61886500  |

|   |            |             |             |
|---|------------|-------------|-------------|
| C | 5.10266700 | 4.49969400  | -0.85500300 |
| H | 5.58638000 | 5.44187600  | -0.56041400 |
| H | 5.88264400 | 3.87428100  | -1.29470100 |
| H | 4.38724700 | 4.76520300  | -1.64591000 |
| C | 6.39688000 | -1.48577700 | -3.28055100 |
| H | 5.36035600 | -1.65693600 | -3.60580500 |
| H | 6.53169800 | -0.40905900 | -3.15755800 |
| H | 7.03379600 | -1.79912700 | -4.11886100 |

INT-16' -7

0 imaginary frequency

H = -5472.496578

G = -5472.712461

E(M06-2X-DCM) = -5473.478182

|   |            |             |             |
|---|------------|-------------|-------------|
| O | 2.25198100 | -2.56037100 | 0.58662100  |
| O | 3.62055000 | -0.52817700 | -0.22434700 |
| P | 2.08544400 | -1.06219000 | -0.07524700 |
| O | 1.35773200 | -0.11942800 | 0.83152200  |
| C | 4.17918700 | -2.96378900 | 4.29303400  |
| C | 4.90889700 | -2.90928500 | 3.11153500  |
| C | 4.26107600 | -2.83384600 | 1.86830700  |
| C | 2.10599000 | -2.75153700 | 3.00707600  |
| C | 2.78980100 | -2.90830300 | 4.22666900  |
| C | 4.53214200 | -1.16869000 | -1.06681400 |
| C | 5.16436700 | -2.33493700 | -0.63525900 |
| C | 5.94436600 | -3.06898900 | -1.54290400 |
| C | 6.22091400 | -2.56496100 | -2.80824600 |
| C | 5.69596300 | -1.32572100 | -3.16880500 |
| C | 4.81886700 | -0.61340200 | -2.33112000 |
| H | 2.20489600 | -2.95680000 | 5.14024200  |
| H | 5.93601400 | -0.90163600 | -4.13877500 |
| C | 5.28614300 | -2.96958000 | 0.74749000  |
| C | 6.56295000 | -2.42421100 | 1.47710700  |
| H | 6.54695400 | -1.32882400 | 1.43993400  |
| H | 7.49019200 | -2.75947200 | 1.00326200  |
| H | 7.45488200 | -4.38221600 | -0.69623700 |
| H | 6.21170200 | -5.23028000 | -1.60833800 |
| C | 2.87169300 | -2.70638500 | 1.82383000  |
| H | 4.67927300 | -3.04030200 | 5.25520700  |
| H | 6.84433800 | -3.11879200 | -3.50579200 |
| C | 6.41036900 | -2.89634000 | 2.93635400  |
| H | 6.91043700 | -2.23481800 | 3.65299000  |
| H | 6.83786600 | -3.89865000 | 3.08079900  |
| C | 6.38170900 | -4.38372700 | -0.93311200 |



|   |              |              |              |
|---|--------------|--------------|--------------|
| C | 5. 52060600  | -4. 46306100 | 0. 34684600  |
| H | 4. 55236200  | -4. 92220000 | 0. 11716500  |
| H | 5. 98588900  | -5. 04455300 | 1. 14908000  |
| C | 4. 26120900  | 0. 68679000  | -2. 81393300 |
| C | 3. 53925200  | 0. 72625500  | -4. 03593800 |
| C | 4. 53869800  | 1. 89047300  | -2. 11559400 |
| C | 3. 19437400  | -0. 44970700 | -4. 78002300 |
| C | 3. 11438400  | 1. 99906100  | -4. 57432500 |
| C | 4. 05626700  | 3. 14835400  | -2. 63987700 |
| C | 2. 54986900  | -0. 36955000 | -5. 98669900 |
| H | 3. 42730400  | -1. 42121600 | -4. 36253400 |
| C | 2. 44172400  | 2. 03838600  | -5. 83605600 |
| C | 3. 36986100  | 3. 16952700  | -3. 85632700 |
| C | 2. 17968400  | 0. 89118300  | -6. 53396600 |
| H | 2. 29661400  | -1. 28064100 | -6. 52185600 |
| H | 2. 14369200  | 3. 00825300  | -6. 22808200 |
| H | 3. 03393500  | 4. 12319900  | -4. 25925800 |
| H | 1. 67136200  | 0. 93482900  | -7. 49358700 |
| C | 0. 61563600  | -2. 63812100 | 3. 06832900  |
| C | 0. 04447700  | -1. 56851700 | 3. 80458400  |
| C | -0. 21762600 | -3. 64926200 | 2. 53006200  |
| C | 0. 81908500  | -0. 47080500 | 4. 30515100  |
| C | -1. 37603400 | -1. 55669600 | 4. 07021000  |
| C | -1. 64490800 | -3. 59701700 | 2. 75904200  |
| C | 0. 25301200  | 0. 52589900  | 5. 05799200  |
| H | 1. 87419500  | -0. 42568300 | 4. 06400800  |
| C | -1. 92460400 | -0. 51520700 | 4. 88474800  |
| C | -2. 18193500 | -2. 56791700 | 3. 53885200  |
| C | -1. 13629100 | 0. 49399000  | 5. 37420100  |
| H | 0. 86725000  | 1. 35216900  | 5. 40423000  |
| H | -2. 98842900 | -0. 54663300 | 5. 11001300  |
| H | -3. 24997700 | -2. 56337000 | 3. 74952800  |
| H | -1. 56407900 | 1. 26913800  | 6. 00560800  |
| C | 5. 54230100  | 3. 11409400  | -0. 24981200 |
| H | 6. 12424100  | 3. 11294200  | 0. 66768100  |
| C | 5. 31273200  | 1. 93665300  | -0. 91139500 |
| H | 5. 72777700  | 1. 01643200  | -0. 51869800 |
| C | 5. 02593700  | 4. 34318300  | -0. 74905900 |
| H | 5. 21111900  | 5. 26574700  | -0. 20556900 |
| C | 4. 31351900  | 4. 35558900  | -1. 91683700 |
| H | 3. 92971700  | 5. 28831500  | -2. 32420500 |
| C | -0. 53882600 | -5. 72246300 | 1. 27769800  |
| H | -0. 12335500 | -6. 54872100 | 0. 70777000  |
| C | -1. 94536300 | -5. 65348000 | 1. 48617800  |

|   |             |             |             |
|---|-------------|-------------|-------------|
| H | -2.58895300 | -6.42594100 | 1.07420700  |
| C | -2.47831900 | -4.62331600 | 2.21250100  |
| H | -3.54915400 | -4.57009900 | 2.39722900  |
| C | 0.29344000  | -4.76077600 | 1.78706200  |
| H | 1.36133600  | -4.83379800 | 1.62209500  |
| N | 1.56999400  | -1.37346300 | -1.57912600 |
| S | 0.05268600  | -1.45448700 | -1.98511800 |
| O | -0.88334900 | -1.44388800 | -0.81685800 |
| O | -0.20493300 | -2.43741300 | -3.03836700 |
| C | -0.31662100 | 0.20134800  | -2.77574000 |
| F | -1.64623400 | 0.30619200  | -2.96678400 |
| F | 0.29141800  | 0.34114700  | -3.94731800 |
| F | 0.06466100  | 1.19913100  | -1.95873300 |
| C | -5.31435100 | -0.72828400 | -0.24400500 |
| C | -6.00974300 | 0.67196700  | -0.19327500 |
| H | -6.40394200 | 0.76439400  | 0.81967300  |
| H | -6.89766600 | 0.61364000  | -0.83347200 |
| C | -5.27109700 | 1.96085300  | -0.56151700 |
| C | -4.09653000 | -0.77614400 | 0.73287800  |
| H | -4.43945100 | -0.43871300 | 1.71153500  |
| H | -3.76409600 | -1.81210800 | 0.84963100  |
| N | -2.88043000 | -0.01087900 | 0.40883500  |
| C | -2.32463100 | 0.94808400  | 1.13034500  |
| N | -1.02665800 | 1.25416100  | 0.97290900  |
| C | -0.44596600 | 2.52105100  | 1.27295500  |
| C | 0.73993800  | 2.57608100  | 2.01055000  |
| C | -1.03226700 | 3.69377400  | 0.79321200  |
| C | 1.30190700  | 3.81817200  | 2.30456900  |
| C | -0.46395000 | 4.92815100  | 1.10574500  |
| H | -1.92248900 | 3.64490200  | 0.17734500  |
| C | 0.70165200  | 5.00015600  | 1.86735100  |
| H | 1.13837000  | 5.96098700  | 2.11088600  |
| C | -1.16280100 | 6.18072000  | 0.64641000  |
| C | 2.59107800  | 3.88158500  | 3.08448600  |
| F | -1.62658100 | 6.05714800  | -0.61684600 |
| F | -2.23691600 | 6.45757900  | 1.42783800  |
| F | -0.35540400 | 7.25872400  | 0.68516300  |
| F | 2.70181200  | 2.84687100  | 3.94984100  |
| F | 3.67144900  | 3.84223200  | 2.27873900  |
| F | 2.67600200  | 5.02228200  | 3.80623600  |
| S | -3.31090000 | 1.83265200  | 2.32166300  |
| H | 1.20785900  | 1.65586300  | 2.33375300  |
| H | -0.34617100 | 0.51976300  | 0.68576100  |
| H | -2.24821100 | -0.44750000 | -0.28426100 |

|   |              |             |             |
|---|--------------|-------------|-------------|
| C | -5.45502500  | 3.10465200  | 0.14577200  |
| H | -2.32180200  | 1.84338800  | 3.24407600  |
| C | -6.29612900  | -1.78515100 | 0.43724500  |
| H | -6.40883200  | -1.48311500 | 1.48906900  |
| H | -5.75644300  | -2.73601100 | 0.45188000  |
| C | -4.99930700  | -1.22965200 | -1.66335300 |
| C | -3.88383200  | -2.03481200 | -1.93818200 |
| C | -5.88543600  | -0.97848000 | -2.72667600 |
| C | -3.63772900  | -2.53565700 | -3.21968100 |
| H | -3.16449200  | -2.28421500 | -1.16707000 |
| C | -5.65318600  | -1.48627900 | -4.00414500 |
| H | -6.77566500  | -0.38093700 | -2.56762300 |
| C | -4.52275300  | -2.26420300 | -4.26027500 |
| H | -2.73614900  | -3.11454600 | -3.39290300 |
| H | -6.35785000  | -1.26520500 | -4.80214900 |
| H | -4.33221100  | -2.64733300 | -5.25911500 |
| C | -7.68773400  | -1.99114700 | -0.13657300 |
| C | -7.99880200  | -3.01051600 | -0.96786000 |
| C | -8.75796500  | -1.01961800 | 0.35137400  |
| H | -9.06413100  | -0.29679300 | -0.41684300 |
| H | -9.66474300  | -1.54026100 | 0.67732700  |
| H | -8.40184000  | -0.43880600 | 1.20733900  |
| C | -9.39387100  | -3.21677800 | -1.51734000 |
| H | -9.36133300  | -3.28298200 | -2.61353100 |
| H | -9.81312500  | -4.17057700 | -1.16575200 |
| H | -10.09638600 | -2.42373500 | -1.25637900 |
| C | -4.49248600  | 1.92458500  | -1.85971100 |
| H | -3.99153800  | 2.86568300  | -2.08740400 |
| H | -3.73534900  | 1.13730000  | -1.86994100 |
| H | -5.16263400  | 1.70146500  | -2.69965800 |
| C | -4.85600900  | 4.44855000  | -0.22071900 |
| H | -4.32969600  | 4.88258400  | 0.63971000  |
| H | -4.15632900  | 4.43067000  | -1.05663100 |
| H | -5.65256100  | 5.16111400  | -0.47917500 |
| C | -6.34285300  | 3.24958400  | 1.36623500  |
| H | -7.19837800  | 3.89802600  | 1.12863100  |
| H | -6.74542800  | 2.31751900  | 1.76416300  |
| H | -5.79726200  | 3.74918100  | 2.17806900  |
| C | -7.03632000  | -4.06472500 | -1.46261000 |
| H | -6.04622900  | -4.02064000 | -1.00856000 |
| H | -7.45120500  | -5.06651800 | -1.28273900 |
| H | -6.89295800  | -3.97316800 | -2.54720400 |

0 imaginary frequency

H = -5472.496581

G = -5472.712463

E(M06-2X-DCM) = -5473.478192

|   |            |             |             |
|---|------------|-------------|-------------|
| O | 2.25175400 | -2.56078500 | 0.58550600  |
| O | 3.62056100 | -0.52826000 | -0.22425700 |
| P | 2.08543900 | -1.06214900 | -0.07542000 |
| O | 1.35790700 | -0.11984600 | 0.83196100  |
| C | 4.17823600 | -2.96635700 | 4.29204500  |
| C | 4.90816800 | -2.91134300 | 3.11069600  |
| C | 4.26056000 | -2.83518300 | 1.86741400  |
| C | 2.10527700 | -2.75321900 | 3.00583200  |
| C | 2.78887200 | -2.91068200 | 4.22546800  |
| C | 4.53225100 | -1.16847000 | -1.06684400 |
| C | 5.16428700 | -2.33498700 | -0.63575800 |
| C | 5.94440700 | -3.06861200 | -1.54365600 |
| C | 6.22127400 | -2.56393100 | -2.80866400 |
| C | 5.69647100 | -1.32447100 | -3.16869700 |
| C | 4.81923900 | -0.61255300 | -2.33082200 |
| H | 2.20380500 | -2.95957100 | 5.13891600  |
| H | 5.93675000 | -0.89989600 | -4.13839600 |
| C | 5.28578200 | -2.97039800 | 0.74667700  |
| C | 6.56251800 | -2.42551200 | 1.47679500  |
| H | 6.54659200 | -1.33010300 | 1.44022900  |
| H | 7.48981400 | -2.76056900 | 1.00290900  |
| H | 7.45466300 | -4.38251100 | -0.69751600 |
| H | 6.21145900 | -5.22988100 | -1.61023200 |
| C | 2.87119200 | -2.70754700 | 1.82275300  |
| H | 4.67814200 | -3.04343400 | 5.25426700  |
| H | 6.84481500 | -3.11744200 | -3.50636000 |
| C | 6.40966900 | -2.89844800 | 2.93575700  |
| H | 6.90971200 | -2.23741000 | 3.65285400  |
| H | 6.83703200 | -3.90089400 | 3.07966800  |
| C | 6.38151900 | -4.38373000 | -0.93451000 |
| C | 5.52021100 | -4.46367100 | 0.34527100  |
| H | 4.55197800 | -4.92264000 | 0.11520300  |
| H | 5.98533000 | -5.04561300 | 1.14727400  |
| C | 4.26165400 | 0.68787500  | -2.81309100 |
| C | 3.53979200 | 0.72790700  | -4.03513500 |
| C | 4.53910600 | 1.89123400  | -2.11418500 |
| C | 3.19495500 | -0.44770400 | -4.77980100 |
| C | 3.11499000 | 2.00097200  | -4.57297300 |
| C | 4.05674800 | 3.14936300  | -2.63792800 |
| C | 2.55054800 | -0.36697700 | -5.98648900 |

|   |              |              |              |
|---|--------------|--------------|--------------|
| H | 3. 42785700  | -1. 41940900 | -4. 36275600 |
| C | 2. 44242300  | 2. 04089100  | -5. 83473900 |
| C | 3. 37043900  | 3. 17110400  | -3. 85442700 |
| C | 2. 18041700  | 0. 89401800  | -6. 53320000 |
| H | 2. 29732400  | -1. 27781500 | -6. 52209200 |
| H | 2. 14443800  | 3. 01094600  | -6. 22633600 |
| H | 3. 03458900  | 4. 12497200  | -4. 25695700 |
| H | 1. 67217300  | 0. 93811400  | -7. 49284200 |
| C | 0. 61491800  | -2. 63968700 | 3. 06689900  |
| C | 0. 04374500  | -1. 57044500 | 3. 80368100  |
| C | -0. 21835800 | -3. 65041300 | 2. 52789100  |
| C | 0. 81837300  | -0. 47305700 | 4. 30492900  |
| C | -1. 37679500 | -1. 55866700 | 4. 06913600  |
| C | -1. 64566700 | -3. 59819000 | 2. 75672600  |
| C | 0. 25225700  | 0. 52332200  | 5. 05817400  |
| H | 1. 87352300  | -0. 42791500 | 4. 06396800  |
| C | -1. 92540600 | -0. 51755500 | 4. 88412500  |
| C | -2. 18270400 | -2. 56953900 | 3. 53711400  |
| C | -1. 13709300 | 0. 49135100  | 5. 37416700  |
| H | 0. 86648200  | 1. 34939400  | 5. 40490900  |
| H | -2. 98926300 | -0. 54902000 | 5. 10923100  |
| H | -3. 25076400 | -2. 56505300 | 3. 74769500  |
| H | -1. 56492700 | 1. 26623800  | 6. 00586400  |
| C | 5. 54259200  | 3. 11395600  | -0. 24775700 |
| H | 6. 12445800  | 3. 11236000  | 0. 66978100  |
| C | 5. 31304400  | 1. 93682700  | -0. 90990600 |
| H | 5. 72803800  | 1. 01641200  | -0. 51760800 |
| C | 5. 02629000  | 4. 34328400  | -0. 74647100 |
| H | 5. 21144400  | 5. 26559300  | -0. 20253600 |
| C | 4. 31396900  | 4. 35625300  | -1. 91430500 |
| H | 3. 93023300  | 5. 28918300  | -2. 32127100 |
| C | -0. 53959700 | -5. 72273000 | 1. 27406700  |
| H | -0. 12413800 | -6. 54863200 | 0. 70361500  |
| C | -1. 94616000 | -5. 65375300 | 1. 48240900  |
| H | -2. 58977000 | -6. 42586700 | 1. 06981800  |
| C | -2. 47910700 | -4. 62404900 | 2. 20938700  |
| H | -3. 54995800 | -4. 57086300 | 2. 39402900  |
| C | 0. 29269600  | -4. 76148900 | 1. 78421600  |
| H | 1. 36060700  | -4. 83450600 | 1. 61934300  |
| N | 1. 56993200  | -1. 37239100 | -1. 57950400 |
| S | 0. 05263300  | -1. 45352900 | -1. 98546500 |
| O | -0. 88338400 | -1. 44334000 | -0. 81716900 |
| O | -0. 20494900 | -2. 43623800 | -3. 03895100 |
| C | -0. 31681300 | 0. 20240300  | -2. 77574300 |

|   |             |             |             |
|---|-------------|-------------|-------------|
| F | 0.06358700  | 1.20007200  | -1.95809400 |
| F | -1.64629800 | 0.30683700  | -2.96761300 |
| F | 0.29199900  | 0.34283500  | -3.94682700 |
| C | -5.31436700 | -0.72772200 | -0.24399800 |
| C | -6.00952200 | 0.67267100  | -0.19334800 |
| H | -6.40412700 | 0.76503200  | 0.81945100  |
| H | -6.89722900 | 0.61459100  | -0.83387400 |
| C | -5.27054900 | 1.96147300  | -0.56112700 |
| C | -4.09678500 | -0.77587700 | 0.73313400  |
| H | -4.43982000 | -0.43829700 | 1.71170300  |
| H | -3.76469400 | -1.81193200 | 0.85003000  |
| N | -2.88038500 | -0.01101100 | 0.40924500  |
| C | -2.32445800 | 0.94784900  | 1.13081600  |
| N | -1.02639900 | 1.25363000  | 0.97358600  |
| C | -0.44559800 | 2.52045900  | 1.27374000  |
| C | 0.73993700  | 2.57543400  | 2.01189900  |
| C | -1.03155600 | 3.69319800  | 0.79358800  |
| C | 1.30188900  | 3.81751500  | 2.30608400  |
| C | -0.46331100 | 4.92754200  | 1.10631900  |
| H | -1.92147200 | 3.64432400  | 0.17727600  |
| C | 0.70193300  | 4.99950400  | 1.86850300  |
| H | 1.13862400  | 5.96031200  | 2.11216700  |
| C | -1.16189600 | 6.18016900  | 0.64675500  |
| C | 2.59074400  | 3.88074700  | 3.08654200  |
| F | -2.23573900 | 6.45758400  | 1.42837000  |
| F | -0.35415900 | 7.25795200  | 0.68502900  |
| F | -1.62599600 | 6.05640100  | -0.61635800 |
| F | 2.67640700  | 5.02220300  | 3.80696100  |
| F | 2.70007700  | 2.84693700  | 3.95321200  |
| F | 3.67145600  | 3.83933100  | 2.28137900  |
| S | -3.31064500 | 1.83267100  | 2.32197700  |
| H | 1.20757600  | 1.65520200  | 2.33548700  |
| H | -0.34597300 | 0.51922100  | 0.68628500  |
| H | -2.24802600 | -0.44796800 | -0.28355600 |
| C | -5.45428800 | 3.10514800  | 0.14640500  |
| H | -2.32161400 | 1.84333400  | 3.24444200  |
| C | -6.29653600 | -1.78443900 | 0.43696900  |
| H | -6.40937600 | -1.48248500 | 1.48880500  |
| H | -5.75706600 | -2.73542300 | 0.45159900  |
| C | -4.99910200 | -1.22907500 | -1.66331000 |
| C | -3.88381400 | -2.03458100 | -1.93789100 |
| C | -5.88481700 | -0.97750700 | -2.72688700 |
| C | -3.63744700 | -2.53533100 | -3.21937900 |
| H | -3.16484000 | -2.28437200 | -1.16656200 |

|   |              |             |             |
|---|--------------|-------------|-------------|
| C | -5.65233000  | -1.48523200 | -4.00434000 |
| H | -6.77490200  | -0.37969100 | -2.56805400 |
| C | -4.52205200  | -2.26346300 | -4.26022000 |
| H | -2.73598500  | -3.11446900 | -3.39238300 |
| H | -6.35668300  | -1.26385100 | -4.80253400 |
| H | -4.33130600  | -2.64650900 | -5.25905300 |
| C | -7.68805200  | -1.99004700 | -0.13715100 |
| C | -7.99920500  | -3.00926400 | -0.96859000 |
| C | -8.75820600  | -1.01834200 | 0.35065200  |
| H | -9.06508500  | -0.29632400 | -0.41803400 |
| H | -9.66463200  | -1.53896600 | 0.67766900  |
| H | -8.40172100  | -0.43666000 | 1.20586100  |
| C | -9.39426000  | -3.21516700 | -1.51823900 |
| H | -9.36172000  | -3.28086500 | -2.61446300 |
| H | -9.81356900  | -4.16911200 | -1.16710900 |
| H | -10.09674100 | -2.42222400 | -1.25689200 |
| C | -4.49176900  | 1.92530600  | -1.85923200 |
| H | -3.98997700  | 2.86609900  | -2.08631800 |
| H | -3.73526300  | 1.13742200  | -1.86970700 |
| H | -5.16194300  | 1.70317000  | -2.69942800 |
| C | -4.85527500  | 4.44905900  | -0.22000000 |
| H | -5.65187600  | 5.16164300  | -0.47828300 |
| H | -4.32881800  | 4.88302800  | 0.64036900  |
| H | -4.15576600  | 4.43125500  | -1.05605500 |
| C | -6.34204700  | 3.24989500  | 1.36694600  |
| H | -7.19834500  | 3.89726600  | 1.12918100  |
| H | -6.74347500  | 2.31761800  | 1.76554600  |
| H | -5.79679000  | 3.75054500  | 2.17834700  |
| C | -7.03684400  | -4.06355900 | -1.46336700 |
| H | -6.89316500  | -3.97172100 | -2.54789900 |
| H | -6.04686200  | -4.01981800 | -1.00903500 |
| H | -7.45198900  | -5.06531500 | -1.28389400 |

INT-16' -9

0 imaginary frequency

H = -5472.499550

G = -5472.714171

E(M06-2X-DCM) = -5473.477375

|   |            |            |             |
|---|------------|------------|-------------|
| O | 0.74096700 | 3.02045100 | 0.35825900  |
| O | 2.79611800 | 1.49359200 | 0.03283500  |
| P | 1.17515100 | 1.43318000 | 0.28444200  |
| O | 0.54126300 | 0.68991600 | -0.83404900 |
| C | 1.73338700 | 5.45645000 | -2.90550900 |
| C | 2.62273400 | 5.27703500 | -1.85177000 |

|   |              |              |              |
|---|--------------|--------------|--------------|
| C | 2. 27290200  | 4. 49492900  | -0. 74070800 |
| C | 0. 11433400  | 4. 01633200  | -1. 76974500 |
| C | 0. 48501800  | 4. 83971300  | -2. 84651700 |
| C | 3. 64053000  | 1. 99256800  | 1. 02267200  |
| C | 3. 74068000  | 3. 36896400  | 1. 21746000  |
| C | 4. 39360500  | 3. 85362800  | 2. 36035200  |
| C | 5. 07176100  | 2. 98302400  | 3. 20770900  |
| C | 5. 11223400  | 1. 62413300  | 2. 89008500  |
| C | 4. 39481800  | 1. 09419100  | 1. 80411100  |
| H | -0. 22636000 | 4. 98053500  | -3. 65527300 |
| H | 5. 69511000  | 0. 94346600  | 3. 50368400  |
| C | 3. 37697200  | 4. 54019000  | 0. 30944100  |
| C | 4. 60576900  | 4. 89760700  | -0. 60140300 |
| H | 4. 98938500  | 3. 97355100  | -1. 04914100 |
| H | 5. 42281700  | 5. 35796100  | -0. 03784500 |
| H | 5. 17760300  | 5. 87807700  | 2. 26101600  |
| H | 3. 90871300  | 5. 67240700  | 3. 46221800  |
| C | 1. 04167800  | 3. 84028100  | -0. 72385100 |
| H | 2. 00427100  | 6. 06251100  | -3. 76633000 |
| H | 5. 58830900  | 3. 35245800  | 4. 09016600  |
| C | 4. 03216900  | 5. 80392200  | -1. 70834800 |
| H | 4. 60259100  | 5. 74799700  | -2. 64244400 |
| H | 4. 03080400  | 6. 85951700  | -1. 40090300 |
| C | 4. 23142000  | 5. 35697700  | 2. 46319700  |
| C | 3. 17343800  | 5. 66400400  | 1. 37559000  |
| H | 2. 16645600  | 5. 57199900  | 1. 79806000  |
| H | 3. 26945100  | 6. 66827600  | 0. 94983500  |
| C | 4. 51715200  | -0. 35837400 | 1. 46372300  |
| C | 4. 08804000  | -1. 35347700 | 2. 37629100  |
| C | 5. 15028400  | -0. 73617200 | 0. 25022100  |
| C | 3. 42647200  | -1. 04252900 | 3. 60674600  |
| C | 4. 29936800  | -2. 75004500 | 2. 06655100  |
| C | 5. 33830500  | -2. 13704500 | -0. 05200900 |
| C | 3. 03081700  | -2. 02785200 | 4. 47295500  |
| H | 3. 21118400  | -0. 00638700 | 3. 83382700  |
| C | 3. 86928800  | -3. 74753300 | 2. 99667800  |
| C | 4. 91276700  | -3. 10365500 | 0. 86291700  |
| C | 3. 26059500  | -3. 39992400 | 4. 17178200  |
| H | 2. 51476000  | -1. 76028100 | 5. 39040300  |
| H | 4. 03374300  | -4. 79156700 | 2. 74067700  |
| H | 5. 06034200  | -4. 15554100 | 0. 63122900  |
| H | 2. 93761100  | -4. 16649800 | 4. 87133800  |
| C | -1. 25934000 | 3. 41959600  | -1. 78537300 |
| C | -1. 58487400 | 2. 41885500  | -2. 73143200 |



|   |             |             |             |
|---|-------------|-------------|-------------|
| C | -2.26637300 | 3.95933000  | -0.94811500 |
| C | -0.60118700 | 1.79966000  | -3.57081700 |
| C | -2.95591500 | 1.98228000  | -2.86855800 |
| C | -3.62945700 | 3.49686400  | -1.07832400 |
| C | -0.94624100 | 0.86008200  | -4.50766800 |
| H | 0.43992000  | 2.06564600  | -3.43581500 |
| C | -3.28038300 | 1.01159300  | -3.87153400 |
| C | -3.93967600 | 2.52892300  | -2.03983600 |
| C | -2.30873100 | 0.47452400  | -4.67714200 |
| H | -0.17551000 | 0.39171300  | -5.11289300 |
| H | -4.32503600 | 0.73360400  | -3.99828200 |
| H | -4.97325200 | 2.20770800  | -2.15554200 |
| H | -2.57162000 | -0.24208900 | -5.45195900 |
| C | 6.24255200  | -0.18817200 | -1.87069600 |
| H | 6.60505200  | 0.55756900  | -2.57319600 |
| C | 5.64835800  | 0.21099800  | -0.70198000 |
| H | 5.55631900  | 1.26884700  | -0.48649600 |
| C | 6.39571400  | -1.57000700 | -2.17524300 |
| H | 6.86491800  | -1.86815800 | -3.10893000 |
| C | 5.96343800  | -2.51336600 | -1.28274600 |
| H | 6.08151300  | -3.57346900 | -1.49201400 |
| C | -2.99983700 | 5.50215200  | 0.79924900  |
| H | -2.76972800 | 6.27794000  | 1.52444200  |
| C | -4.33965800 | 5.03726300  | 0.67203500  |
| H | -5.11926900 | 5.46183800  | 1.29880500  |
| C | -4.64166900 | 4.06370700  | -0.24215400 |
| H | -5.66224800 | 3.70508100  | -0.35338800 |
| C | -2.00183900 | 4.98422800  | 0.01583800  |
| H | -0.98836400 | 5.35322800  | 0.12109300  |
| N | 0.94849700  | 0.96322600  | 1.83005100  |
| S | -0.20338400 | -0.00440400 | 2.25178600  |
| O | 0.11547700  | -1.46037200 | 2.17966700  |
| O | -1.56331400 | 0.31039400  | 1.72507500  |
| C | -0.34318300 | 0.38249300  | 4.07239300  |
| F | -0.81853500 | 1.61810600  | 4.23121500  |
| F | 0.83333200  | 0.28589900  | 4.69763600  |
| F | -1.19633600 | -0.48718300 | 4.62759400  |
| C | -5.17624900 | -1.66247600 | 0.68557000  |
| C | -4.87066100 | -3.09542300 | 1.26584300  |
| H | -5.00520000 | -3.79086500 | 0.43440800  |
| H | -5.68961200 | -3.32350400 | 1.96276100  |
| C | -3.56547500 | -3.40518700 | 1.98843500  |
| C | -4.20221100 | -1.31237200 | -0.47191600 |
| H | -4.39839800 | -2.01766900 | -1.27839300 |

|   |             |             |             |
|---|-------------|-------------|-------------|
| H | -4.42368100 | -0.31279100 | -0.85761400 |
| N | -2.76151600 | -1.39363000 | -0.18365000 |
| C | -1.86075400 | -2.03241000 | -0.91292500 |
| N | -0.64806200 | -2.30213900 | -0.42427300 |
| C | 0.49824600  | -2.69712200 | -1.19179300 |
| C | 1.14831800  | -3.88285100 | -0.85437600 |
| C | 0.98494200  | -1.88309700 | -2.21541900 |
| C | 2.28093200  | -4.27102100 | -1.57331700 |
| C | 2.10441200  | -2.29434800 | -2.93626000 |
| H | 0.52453000  | -0.92133800 | -2.39990500 |
| C | 2.75463700  | -3.48867800 | -2.62622500 |
| H | 3.63762000  | -3.78731200 | -3.17648400 |
| C | 2.58794000  | -1.42448800 | -4.06862100 |
| C | 2.95371400  | -5.57530500 | -1.23825100 |
| F | 2.61342300  | -0.12207000 | -3.72805600 |
| F | 3.82326300  | -1.76957500 | -4.48574600 |
| F | 1.76336700  | -1.52625600 | -5.14627900 |
| F | 2.89524800  | -5.84467700 | 0.08539300  |
| F | 2.37227700  | -6.61732300 | -1.87557200 |
| F | 4.25975800  | -5.57849300 | -1.59425900 |
| S | -2.24167500 | -2.66430200 | -2.54042100 |
| H | 0.78337500  | -4.48753600 | -0.03125600 |
| H | -0.45766700 | -2.06303600 | 0.56737100  |
| H | -2.39343000 | -0.86191600 | 0.62598300  |
| C | -2.72423000 | -4.39145800 | 1.60090900  |
| H | -2.78802400 | -1.51011000 | -2.99326800 |
| C | -6.59527700 | -1.81521500 | -0.01114500 |
| H | -7.31164200 | -2.03317100 | 0.78995900  |
| H | -6.54861000 | -2.72113200 | -0.62100200 |
| C | -5.27113800 | -0.58407400 | 1.77908600  |
| C | -4.58541100 | 0.63511300  | 1.71577200  |
| C | -6.12387500 | -0.78769200 | 2.88041600  |
| C | -4.72397200 | 1.60208600  | 2.71677900  |
| H | -3.91547800 | 0.86126200  | 0.89539700  |
| C | -6.27309500 | 0.17462500  | 3.87548300  |
| H | -6.68366900 | -1.71443400 | 2.97031100  |
| C | -5.56859100 | 1.37855400  | 3.80029100  |
| H | -4.16128900 | 2.52677900  | 2.63523800  |
| H | -6.93904900 | -0.01852900 | 4.71271000  |
| H | -5.67651600 | 2.12832100  | 4.57939100  |
| C | -7.14435400 | -0.65757600 | -0.83458700 |
| C | -7.17793400 | -0.66747400 | -2.18757400 |
| C | -7.73190700 | 0.48425400  | -0.02100000 |
| H | -8.51386100 | 1.02564200  | -0.55794600 |

|   |             |             |             |
|---|-------------|-------------|-------------|
| H | -8.17590100 | 0.10289500  | 0.90432400  |
| H | -6.96972300 | 1.20969200  | 0.28861300  |
| C | -7.74311900 | 0.46716300  | -3.01880100 |
| H | -7.93549500 | 1.38101600  | -2.45554600 |
| H | -7.05151100 | 0.72414700  | -3.83303800 |
| H | -8.68285100 | 0.16487800  | -3.50387000 |
| C | -3.33376000 | -2.64204000 | 3.27587600  |
| H | -2.48715500 | -3.02661000 | 3.84484600  |
| H | -3.15090000 | -1.57738100 | 3.10178800  |
| H | -4.22263600 | -2.69758100 | 3.91794600  |
| C | -1.48590200 | -4.75657700 | 2.41164100  |
| H | -0.86683600 | -5.47865900 | 1.86731000  |
| H | -0.85891500 | -3.88857200 | 2.63922400  |
| H | -1.74956700 | -5.22875000 | 3.36766400  |
| C | -2.89783400 | -5.27412200 | 0.38367800  |
| H | -2.01144500 | -5.21730200 | -0.26420800 |
| H | -2.97819000 | -6.32737400 | 0.68895600  |
| H | -3.76811300 | -5.04556400 | -0.23374800 |
| C | -6.68496200 | -1.79562000 | -3.06974800 |
| H | -5.80351900 | -1.48324400 | -3.64910600 |
| H | -6.42089000 | -2.71055100 | -2.53683100 |
| H | -7.45425700 | -2.05703200 | -3.80933800 |

INT-16-1

0 imaginary frequency

H = -5472.519877

G = -5472.736742

E(M06-2X-DCM) = -5473.494882

|   |            |             |             |
|---|------------|-------------|-------------|
| C | 4.00022800 | -2.64540400 | 0.53386100  |
| C | 4.55462000 | -1.87830800 | 1.79382800  |
| H | 3.78537400 | -1.16666700 | 2.10077000  |
| H | 4.62911500 | -2.61352800 | 2.60622100  |
| C | 5.90182900 | -1.17257700 | 1.70915000  |
| C | 4.00296400 | -1.71205200 | -0.70111500 |
| H | 3.78314700 | -2.27199500 | -1.61567600 |
| H | 4.99934900 | -1.28555800 | -0.82396500 |
| N | 3.06842300 | -0.59698400 | -0.58606200 |
| C | 3.21002200 | 0.57435300  | -1.25722400 |
| N | 2.12752400 | 1.41513100  | -1.07478200 |
| C | 1.95270700 | 2.76113400  | -1.41955000 |
| C | 3.00682500 | 3.67057700  | -1.61509800 |
| C | 0.63317700 | 3.23434500  | -1.50287100 |
| C | 2.72989900 | 5.00354200  | -1.91027200 |
| C | 0.37872700 | 4.57582300  | -1.78670200 |

|   |             |             |             |
|---|-------------|-------------|-------------|
| H | -0.19386100 | 2.55256300  | -1.33234500 |
| C | 1.42048700  | 5.47535300  | -2.00241600 |
| H | 1.21924300  | 6.51481700  | -2.22858800 |
| C | -1.04190900 | 5.06113100  | -1.79853200 |
| C | 3.87329600  | 5.94773700  | -2.17997900 |
| F | -1.87506600 | 4.17263500  | -2.39267100 |
| F | -1.18379100 | 6.23768000  | -2.43993000 |
| F | -1.52521400 | 5.24554900  | -0.53609700 |
| F | 4.20900900  | 5.96360800  | -3.48957900 |
| F | 4.98322500  | 5.60967300  | -1.49049700 |
| F | 3.55845200  | 7.22043500  | -1.84163600 |
| S | 4.55507200  | 0.92301400  | -2.21856100 |
| H | 4.02946700  | 3.33313200  | -1.53905500 |
| C | 6.03567300  | 0.17215900  | 1.67608700  |
| H | 1.28656800  | 0.96356900  | -0.71283900 |
| H | 2.15324000  | -0.80979200 | -0.19637000 |
| H | -0.80255900 | -1.96060100 | 1.76765100  |
| O | -1.65808800 | 1.23730500  | 0.89820500  |
| O | -2.80850500 | -0.61050500 | -0.49140500 |
| P | -1.47858100 | -0.26512500 | 0.34799600  |
| O | -0.14750500 | -0.37336400 | -0.29660200 |
| C | -4.70651400 | 2.07724200  | 3.63729600  |
| C | -5.00213400 | 1.93393300  | 2.28672100  |
| C | -3.97581600 | 1.77915200  | 1.34047100  |
| C | -2.32864800 | 1.78598000  | 3.15283500  |
| C | -3.37428100 | 2.04917600  | 4.05169900  |
| C | -3.21755900 | 0.18778100  | -1.58326000 |
| C | -3.94329400 | 1.35075100  | -1.33807900 |
| C | -4.26332400 | 2.17631900  | -2.43038100 |
| C | -3.93667100 | 1.80531800  | -3.72951200 |
| C | -3.27896200 | 0.59592900  | -3.94859500 |
| C | -2.89379300 | -0.23579300 | -2.88586100 |
| H | -3.12879800 | 2.19684000  | 5.09907600  |
| H | -3.03512500 | 0.28371100  | -4.95967500 |
| C | -4.56213400 | 1.92129900  | -0.06226900 |
| C | -6.00369500 | 1.37047800  | 0.19369300  |
| H | -6.71565200 | 1.69210000  | -0.57275200 |
| H | -5.96968000 | 0.27503500  | 0.18909900  |
| H | -4.54591600 | 4.33133400  | -2.46699500 |
| H | -6.02138300 | 3.41174100  | -2.16624800 |
| C | -2.67569800 | 1.60958800  | 1.80061500  |
| H | -5.50039600 | 2.21157900  | 4.36743800  |
| H | -4.18746900 | 2.44996000  | -4.56770500 |
| C | -6.35617600 | 1.87600300  | 1.61174500  |

|   |             |             |             |
|---|-------------|-------------|-------------|
| H | -6.83709900 | 2.86312100  | 1.57975400  |
| H | -7.04619700 | 1.20564800  | 2.13593000  |
| C | -4.94164800 | 3.44323500  | -1.96444700 |
| C | -4.64555000 | 3.43867000  | -0.45250300 |
| H | -5.39168900 | 3.97653600  | 0.13903800  |
| H | -3.67409600 | 3.90785900  | -0.27171600 |
| C | -2.20379400 | -1.53268500 | -3.18313800 |
| C | -2.95038900 | -2.73532100 | -3.15751200 |
| C | -0.84351900 | -1.54244200 | -3.57121000 |
| C | -4.34964200 | -2.77437500 | -2.85690500 |
| C | -2.29887300 | -3.98538500 | -3.47629100 |
| C | -0.20711900 | -2.79886600 | -3.90063000 |
| C | -5.04509600 | -3.95564700 | -2.84624200 |
| H | -4.86466300 | -1.84511400 | -2.63966200 |
| C | -3.05796600 | -5.19683100 | -3.44184200 |
| C | -0.94636200 | -3.98301000 | -3.83169500 |
| C | -4.39193900 | -5.18763700 | -3.13449000 |
| H | -6.10783500 | -3.95450800 | -2.61905000 |
| H | -2.54953400 | -6.12895000 | -3.67717300 |
| H | -0.46243600 | -4.92533300 | -4.08169100 |
| H | -4.95866600 | -6.11451200 | -3.11808600 |
| C | -0.91228400 | 1.72758900  | 3.63496100  |
| C | 0.00352200  | 2.73806800  | 3.24511100  |
| C | -0.50537600 | 0.70156400  | 4.52432900  |
| C | -0.35138700 | 3.82305200  | 2.38093700  |
| C | 1.35860600  | 2.70458400  | 3.74800100  |
| C | 0.85537400  | 0.68030000  | 5.01465200  |
| C | 0.55829800  | 4.78702100  | 2.03181000  |
| H | -1.36264600 | 3.88495100  | 1.99632200  |
| C | 2.27717300  | 3.72920100  | 3.35845200  |
| C | 1.74688400  | 1.67774300  | 4.61280700  |
| C | 1.89345700  | 4.74222400  | 2.52245800  |
| H | 0.25604700  | 5.58930400  | 1.36648200  |
| H | 3.29169700  | 3.68350800  | 3.74674300  |
| H | 2.76870500  | 1.65774400  | 4.98624000  |
| H | 2.60076100  | 5.51354400  | 2.23114800  |
| C | 1.25865500  | -0.39571600 | -4.06112500 |
| H | 1.84265400  | 0.51754000  | -4.11996200 |
| C | -0.05250800 | -0.35198700 | -3.66575200 |
| H | -0.50953600 | 0.60059000  | -3.42162300 |
| C | 1.88117500  | -1.63657500 | -4.38170200 |
| H | 2.92355500  | -1.64491900 | -4.68642300 |
| C | 1.16660500  | -2.80169000 | -4.30148500 |
| H | 1.62650400  | -3.75494800 | -4.55282400 |

|   |             |             |             |
|---|-------------|-------------|-------------|
| C | -0.94773800 | -1.33359200 | 5.80753200  |
| H | -1.63345000 | -2.12169100 | 6.10442200  |
| C | 0.39129500  | -1.34451800 | 6.29134400  |
| H | 0.71412700  | -2.13199400 | 6.96697500  |
| C | 1.26383700  | -0.36410700 | 5.90251300  |
| H | 2.28995100  | -0.35845300 | 6.26286500  |
| C | -1.37952200 | -0.34703400 | 4.95914100  |
| H | -2.40264900 | -0.35893700 | 4.60288500  |
| N | -1.65404200 | -1.42519300 | 1.57436400  |
| S | -3.01229000 | -2.18650500 | 2.22877900  |
| C | -3.72929200 | -3.25824900 | 0.83616400  |
| O | -4.03978800 | -1.20325100 | 2.53319200  |
| O | -2.48919300 | -3.12498700 | 3.21368600  |
| F | -4.21824700 | -4.35923900 | 1.40534500  |
| F | -4.70898300 | -2.60345200 | 0.22506100  |
| F | -2.77868700 | -3.59259400 | -0.03356400 |
| C | 2.58378600  | -3.18484200 | 0.82433800  |
| C | 2.07920000  | -3.32790000 | 2.12826000  |
| C | 1.75671800  | -3.61497600 | -0.23129700 |
| C | 0.83066100  | -3.90862600 | 2.37171400  |
| H | 2.65615400  | -2.99314600 | 2.98168800  |
| C | 0.51157200  | -4.19690500 | 0.00334600  |
| H | 2.08128800  | -3.49734300 | -1.25868800 |
| C | 0.04741900  | -4.36439200 | 1.30986300  |
| H | 0.47330100  | -4.00583800 | 3.39321200  |
| H | -0.09789500 | -4.51168300 | -0.83913000 |
| H | -0.91488600 | -4.82877900 | 1.50106900  |
| C | 4.96092400  | -3.86695300 | 0.23245100  |
| H | 5.94448800  | -3.44204700 | 0.00923800  |
| H | 5.07167200  | -4.40570500 | 1.17725300  |
| C | 4.62812300  | -4.84315700 | -0.88543400 |
| C | 4.03355800  | -6.03759900 | -0.67294800 |
| C | 7.38540900  | 0.85550800  | 1.60469900  |
| H | 8.21915200  | 0.17519000  | 1.42534300  |
| H | 7.38441100  | 1.59498900  | 0.79323900  |
| H | 7.59373800  | 1.41169100  | 2.53085100  |
| C | 3.74037700  | -7.01511900 | -1.79006500 |
| H | 2.66595000  | -7.24608600 | -1.82140500 |
| H | 4.02994300  | -6.65636500 | -2.77914000 |
| H | 4.25326800  | -7.97174600 | -1.61460400 |
| C | 5.08985400  | -4.43127000 | -2.28015300 |
| H | 4.25360500  | -4.20367800 | -2.95538800 |
| H | 5.71737300  | -3.53642500 | -2.24153500 |
| H | 5.68367000  | -5.21562800 | -2.76338500 |

|   |            |             |            |
|---|------------|-------------|------------|
| C | 7.13436600 | -2.06820200 | 1.79799300 |
| H | 7.63640000 | -2.21046200 | 0.83142300 |
| H | 7.88218700 | -1.66133600 | 2.48634100 |
| H | 6.87061700 | -3.06289900 | 2.16849900 |
| C | 4.91010100 | 1.17821300  | 1.72730900 |
| H | 3.91890500 | 0.74859900  | 1.87277100 |
| H | 5.09078700 | 1.89089200  | 2.54514800 |
| H | 4.88348500 | 1.76799900  | 0.80267200 |
| C | 3.57244700 | -6.55576000 | 0.66944900 |
| H | 3.98669700 | -7.55713000 | 0.85388700 |
| H | 3.84227600 | -5.91841600 | 1.51204700 |
| H | 2.47903300 | -6.66151500 | 0.68303000 |

INT-16-2

0 imaginary frequency

H = -5472.520795

G = -5472.736457

E(M06-2X-DCM) = -5473.495520

|   |             |             |             |
|---|-------------|-------------|-------------|
| C | 4.03448700  | -2.65282700 | 0.45565100  |
| C | 4.66730600  | -1.85166800 | 1.65576000  |
| H | 3.93217200  | -1.10669200 | 1.96773200  |
| H | 4.76045600  | -2.55569100 | 2.49327100  |
| C | 6.02783700  | -1.18935200 | 1.48161300  |
| C | 3.97682700  | -1.76068200 | -0.80922200 |
| H | 3.71668000  | -2.35213200 | -1.69287300 |
| H | 4.96432300  | -1.33466300 | -0.99249600 |
| N | 3.04115900  | -0.64718600 | -0.68724600 |
| C | 3.13195500  | 0.49839900  | -1.40846400 |
| N | 2.03644300  | 1.32163400  | -1.22404400 |
| C | 1.86072200  | 2.66605500  | -1.57319500 |
| C | 2.91546800  | 3.59031000  | -1.65993500 |
| C | 0.54737700  | 3.12142300  | -1.76397000 |
| C | 2.64736800  | 4.92509200  | -1.95170100 |
| C | 0.29992400  | 4.46352100  | -2.05172900 |
| H | -0.28006400 | 2.42504900  | -1.67796200 |
| C | 1.34433300  | 5.37895300  | -2.16018800 |
| H | 1.15042500  | 6.41745700  | -2.39915200 |
| C | -1.11739500 | 4.94507100  | -2.16400200 |
| C | 3.77421200  | 5.92380100  | -1.93976100 |
| F | -1.93838700 | 4.00638400  | -2.69205800 |
| F | -1.22832900 | 6.05306500  | -2.92383900 |
| F | -1.63604200 | 5.26053900  | -0.94192300 |
| F | 3.55943800  | 6.93498200  | -2.81045400 |
| F | 4.96134100  | 5.36612900  | -2.24340600 |

|   |              |              |              |
|---|--------------|--------------|--------------|
| F | 3. 90967900  | 6. 49472000  | -0. 71206400 |
| S | 4. 42774900  | 0. 84603900  | -2. 43476000 |
| H | 3. 93277200  | 3. 26306600  | -1. 50435300 |
| C | 6. 19642000  | 0. 14781000  | 1. 37865100  |
| H | 1. 20241100  | 0. 86554600  | -0. 85060900 |
| H | 2. 15057100  | -0. 85110600 | -0. 24048500 |
| H | -0. 74409800 | -1. 86486400 | 1. 87063200  |
| O | -1. 61964000 | 1. 28042200  | 0. 84423700  |
| O | -2. 85886300 | -0. 63758100 | -0. 35943500 |
| P | -1. 48346700 | -0. 25638100 | 0. 38600300  |
| O | -0. 19086000 | -0. 42600200 | -0. 32054000 |
| C | -4. 51282300 | 2. 32333700  | 3. 67857600  |
| C | -4. 88047900 | 2. 09894600  | 2. 35689300  |
| C | -3. 90646200 | 1. 87449600  | 1. 37023500  |
| C | -2. 16550400 | 1. 98441200  | 3. 08910600  |
| C | -3. 16023400 | 2. 31141500  | 4. 02360900  |
| C | -3. 30833200 | 0. 09761000  | -1. 47915800 |
| C | -4. 01173700 | 1. 28165300  | -1. 27326200 |
| C | -4. 37274700 | 2. 04357900  | -2. 39839900 |
| C | -4. 10747000 | 1. 59120400  | -3. 68578100 |
| C | -3. 46945500 | 0. 36405600  | -3. 85983200 |
| C | -3. 04426800 | -0. 40631700 | -2. 76647300 |
| H | -2. 85873400 | 2. 52531600  | 5. 04464000  |
| H | -3. 27244800 | -0. 01048800 | -4. 85990400 |
| C | -4. 56259300 | 1. 93678800  | -0. 00697700 |
| C | -5. 99394200 | 1. 42063200  | 0. 35529200  |
| H | -6. 74169200 | 1. 70475800  | -0. 39169700 |
| H | -5. 97091400 | 0. 32653000  | 0. 41533500  |
| H | -4. 63640100 | 4. 19548200  | -2. 55412700 |
| H | -6. 10511400 | 3. 31400900  | -2. 13071800 |
| C | -2. 58552800 | 1. 72168600  | 1. 77195900  |
| H | -5. 26620500 | 2. 51020200  | 4. 43943500  |
| H | -4. 38970600 | 2. 18700500  | -4. 54970900 |
| C | -6. 26814000 | 2. 01473700  | 1. 75664700  |
| H | -6. 74228300 | 3. 00336000  | 1. 68930900  |
| H | -6. 93549100 | 1. 38480700  | 2. 35506200  |
| C | -5. 01694500 | 3. 34445900  | -1. 98055300 |
| C | -4. 65066900 | 3. 42831100  | -0. 48635900 |
| H | -5. 36310300 | 4. 01059200  | 0. 10474100  |
| H | -3. 66762200 | 3. 89634200  | -0. 38066500 |
| C | -2. 37451400 | -1. 72414800 | -3. 01402700 |
| C | -3. 12411700 | -2. 91760300 | -2. 87914800 |
| C | -1. 03299100 | -1. 76768400 | -3. 46118900 |
| C | -4. 50742000 | -2. 92813600 | -2. 51004500 |



|   |             |             |             |
|---|-------------|-------------|-------------|
| C | -2.49394200 | -4.18948500 | -3.15101100 |
| C | -0.41808800 | -3.04655500 | -3.74100000 |
| C | -5.20664700 | -4.10149200 | -2.39415900 |
| H | -5.00734900 | -1.98374200 | -2.32530600 |
| C | -3.25594700 | -5.39102300 | -3.00725400 |
| C | -1.15937100 | -4.21871500 | -3.56775400 |
| C | -4.57360500 | -5.35341700 | -2.63800500 |
| H | -6.25712300 | -4.07886400 | -2.11665900 |
| H | -2.76343600 | -6.33939900 | -3.20906600 |
| H | -0.69184200 | -5.17806700 | -3.78153600 |
| H | -5.14301000 | -6.27340100 | -2.53828800 |
| C | -0.72194200 | 1.95411200  | 3.48452600  |
| C | 0.16271500  | 2.93443500  | 2.96715200  |
| C | -0.25077400 | 0.97994300  | 4.39918800  |
| C | -0.25886700 | 3.97466500  | 2.07856000  |
| C | 1.55579900  | 2.91337700  | 3.35262300  |
| C | 1.14423100  | 0.97798000  | 4.78229200  |
| C | 0.62675800  | 4.89783900  | 1.58733800  |
| H | -1.30191500 | 4.03365200  | 1.78967700  |
| C | 2.44845400  | 3.89070200  | 2.81014100  |
| C | 2.00658400  | 1.93774600  | 4.24633800  |
| C | 2.00405900  | 4.85315500  | 1.94437300  |
| H | 0.27306000  | 5.66535800  | 0.90656800  |
| H | 3.49524800  | 3.84646600  | 3.10075700  |
| H | 3.05612600  | 1.92682400  | 4.53326100  |
| H | 2.69359300  | 5.57343500  | 1.51429200  |
| C | 1.05407600  | -0.66916200 | -4.10506900 |
| H | 1.64070400  | 0.23440800  | -4.24021900 |
| C | -0.23985900 | -0.59165200 | -3.66092400 |
| H | -0.68185400 | 0.37744900  | -3.45787100 |
| C | 1.65484400  | -1.93208900 | -4.37750300 |
| H | 2.68293200  | -1.96790800 | -4.72593600 |
| C | 0.93703800  | -3.08433300 | -4.19938200 |
| H | 1.38007700  | -4.05453000 | -4.41333900 |
| C | -0.59867700 | -0.97133200 | 5.83244700  |
| H | -1.26146500 | -1.73504600 | 6.22861400  |
| C | 0.77365800  | -0.96226100 | 6.21213000  |
| H | 1.14538100  | -1.70947700 | 6.90808300  |
| C | 1.61658400  | -0.01378500 | 5.69845400  |
| H | 2.66746200  | 0.00555800  | 5.97794200  |
| C | -1.09174300 | -0.03472500 | 4.96117300  |
| H | -2.13921700 | -0.06033200 | 4.68487600  |
| N | -1.60127700 | -1.33339600 | 1.69201200  |
| S | -2.92608800 | -2.03801100 | 2.46611500  |

|   |             |             |             |
|---|-------------|-------------|-------------|
| C | -3.72055000 | -3.19107100 | 1.18509200  |
| O | -3.93030600 | -1.02794000 | 2.75968000  |
| O | -2.35548900 | -2.91580400 | 3.48023500  |
| F | -4.18913200 | -4.24683000 | 1.84904100  |
| F | -4.72406300 | -2.56779200 | 0.57973500  |
| F | -2.81636200 | -3.59240000 | 0.29381500  |
| C | 2.62904900  | -3.16079300 | 0.84261600  |
| C | 2.18604400  | -3.23053600 | 2.17456400  |
| C | 1.74546900  | -3.62860400 | -0.14955600 |
| C | 0.94235600  | -3.77713700 | 2.50617900  |
| H | 2.80710300  | -2.86214700 | 2.98178100  |
| C | 0.50495000  | -4.17717400 | 0.17322700  |
| H | 2.02128900  | -3.56652500 | -1.19585500 |
| C | 0.10211100  | -4.27164100 | 1.50727600  |
| H | 0.63351800  | -3.81681400 | 3.54720100  |
| H | -0.14916000 | -4.52311200 | -0.62223100 |
| H | -0.85618700 | -4.71038600 | 1.76700100  |
| C | 4.96431100  | -3.89497400 | 0.14469300  |
| H | 5.93829600  | -3.48887500 | -0.14594700 |
| H | 5.12168500  | -4.40269100 | 1.09997800  |
| C | 4.56295500  | -4.90564200 | -0.91891000 |
| C | 3.96809300  | -6.08449900 | -0.63296400 |
| C | 7.56098100  | 0.78645100  | 1.22321700  |
| H | 7.83310200  | 1.35655000  | 2.12410000  |
| H | 8.36294300  | 0.07522600  | 1.01987500  |
| H | 7.54241200  | 1.50688100  | 0.39513300  |
| C | 3.60805200  | -7.09797400 | -1.69720500 |
| H | 4.11782100  | -8.05442300 | -1.51199300 |
| H | 2.53078100  | -7.31549200 | -1.66690600 |
| H | 3.85225800  | -6.77940000 | -2.71196500 |
| C | 4.95596800  | -4.54917500 | -2.34951500 |
| H | 5.59291300  | -3.66054000 | -2.37554000 |
| H | 5.51701900  | -5.35678800 | -2.83361800 |
| H | 4.08812500  | -4.33679400 | -2.98890600 |
| C | 7.23996600  | -2.11314000 | 1.56624000  |
| H | 8.01971600  | -1.69894500 | 2.21379200  |
| H | 6.96429700  | -3.08553500 | 1.98398500  |
| H | 7.70646800  | -2.30587500 | 0.59069100  |
| C | 5.10109300  | 1.18663200  | 1.42540900  |
| H | 5.34182700  | 1.94035400  | 2.18933700  |
| H | 5.04240100  | 1.72014500  | 0.46864300  |
| H | 4.10795200  | 0.79403200  | 1.64464100  |
| C | 3.57207400  | -6.54843400 | 0.74944800  |
| H | 3.99358600  | -7.54309900 | 0.95296100  |

|   |            |             |            |
|---|------------|-------------|------------|
| H | 3.88275300 | -5.87910200 | 1.55219700 |
| H | 2.48049800 | -6.65026500 | 0.81992200 |

INT-16-3

0 imaginary frequency

H = -5472.512297

G = -5472.730669

E(M06-2X-DCM) = -5473.496169

|   |             |             |             |
|---|-------------|-------------|-------------|
| C | -4.63116400 | -0.08928000 | 0.14919100  |
| C | -4.68984100 | 1.11460600  | -0.88460000 |
| H | -4.54965900 | 2.02335200  | -0.30061800 |
| H | -3.80294200 | 1.06710500  | -1.52620500 |
| C | -5.92209800 | 1.29078000  | -1.76829500 |
| C | -3.90454000 | 0.46746300  | 1.40967100  |
| H | -3.81766800 | -0.29538700 | 2.18859600  |
| H | -4.47279500 | 1.29892600  | 1.82778100  |
| N | -2.57030900 | 0.96867000  | 1.11545200  |
| C | -2.12199600 | 2.22210700  | 1.36526600  |
| N | -0.78057100 | 2.35459600  | 1.05774500  |
| C | 0.06903500  | 3.46630100  | 1.13179800  |
| C | -0.35628000 | 4.79617000  | 0.97268900  |
| C | 1.43775100  | 3.21349900  | 1.31456800  |
| C | 0.57307200  | 5.83209100  | 1.03328500  |
| C | 2.35282500  | 4.26447700  | 1.36505900  |
| H | 1.78604400  | 2.19096000  | 1.41846900  |
| C | 1.93142900  | 5.58619400  | 1.23815900  |
| H | 2.64005300  | 6.40325300  | 1.29846100  |
| C | 3.81850200  | 3.96143700  | 1.49013800  |
| C | 0.12373400  | 7.24740500  | 0.78139600  |
| F | 4.05300100  | 2.86808800  | 2.25298800  |
| F | 4.51226700  | 4.98583500  | 2.02525000  |
| F | 4.38419800  | 3.70407800  | 0.27519400  |
| F | -1.17972100 | 7.43335300  | 1.05808100  |
| F | 0.30458200  | 7.59668800  | -0.52175200 |
| F | 0.83174100  | 8.13526500  | 1.51494900  |
| S | -3.08833800 | 3.45662300  | 2.00233900  |
| H | -1.40280300 | 5.00967900  | 0.81430700  |
| C | -6.86810600 | 2.22475100  | -1.51516900 |
| H | -0.30327100 | 1.47738600  | 0.85221300  |
| H | -1.89040800 | 0.27677600  | 0.80774600  |
| H | -0.23913300 | -2.51214200 | -1.31889300 |
| O | 1.99391300  | -0.01547100 | -0.87856700 |
| O | 2.19131000  | -1.95081600 | 0.82899900  |
| P | 1.16442100  | -1.16542800 | -0.10998900 |

|   |             |             |             |
|---|-------------|-------------|-------------|
| O | -0.03758300 | -0.54149700 | 0.49294100  |
| C | 4.71232900  | -1.23890700 | -3.80050500 |
| C | 5.03420800  | -1.36756000 | -2.45344700 |
| C | 4.19267500  | -0.83214100 | -1.46385400 |
| C | 2.62956900  | -0.10213500 | -3.20665600 |
| C | 3.54630400  | -0.56058200 | -4.16599700 |
| C | 3.06981000  | -1.32194700 | 1.72720500  |
| C | 4.26365800  | -0.78866000 | 1.25148900  |
| C | 5.08917400  | -0.10816400 | 2.16341600  |
| C | 4.77055700  | -0.05228200 | 3.51608000  |
| C | 3.60255400  | -0.66370200 | 3.97078800  |
| C | 2.71535600  | -1.29726100 | 3.08730800  |
| H | 3.32137800  | -0.39703500 | -5.21575800 |
| H | 3.34834000  | -0.63636700 | 5.02614500  |
| C | 4.92973900  | -0.82748200 | -0.12446300 |
| C | 5.84679700  | -2.07937000 | -0.31703600 |
| H | 6.71481500  | -2.06483100 | 0.34917000  |
| H | 5.26453700  | -2.98103700 | -0.10250400 |
| H | 6.44248500  | 1.55087300  | 1.78970300  |
| H | 7.18705300  | -0.04049600 | 1.62313500  |
| C | 2.96017800  | -0.32309800 | -1.85457700 |
| H | 5.36978500  | -1.63998100 | -4.56766700 |
| H | 5.41858600  | 0.47158100  | 4.21363900  |
| C | 6.22829600  | -2.04758900 | -1.81657400 |
| H | 7.15232200  | -1.47871200 | -1.98763700 |
| H | 6.39565600  | -3.05030900 | -2.22538900 |
| C | 6.26115200  | 0.52570200  | 1.45137200  |
| C | 5.82029900  | 0.46219500  | -0.02418900 |
| H | 6.65606300  | 0.44465700  | -0.72951200 |
| H | 5.20670800  | 1.33966100  | -0.25230700 |
| C | 1.45278100  | -1.92027400 | 3.59521300  |
| C | 1.33583800  | -3.33055900 | 3.64457700  |
| C | 0.39736900  | -1.09613100 | 4.05413900  |
| C | 2.38086200  | -4.21328700 | 3.22171800  |
| C | 0.12317100  | -3.92592200 | 4.15756000  |
| C | -0.80970900 | -1.70656600 | 4.56541100  |
| C | 2.23296400  | -5.57429800 | 3.28273200  |
| H | 3.30764700  | -3.79109500 | 2.84916000  |
| C | 0.01024300  | -5.35053500 | 4.20492000  |
| C | -0.91264200 | -3.09943300 | 4.60212200  |
| C | 1.03135200  | -6.15525200 | 3.77786100  |
| H | 3.04139100  | -6.21986200 | 2.95079600  |
| H | -0.91066900 | -5.78039700 | 4.59212600  |
| H | -1.82299600 | -3.55323600 | 4.98929900  |

|   |             |             |             |
|---|-------------|-------------|-------------|
| H | 0.93255200  | -7.23652400 | 3.81681000  |
| C | 1.40024000  | 0.65665700  | -3.60752000 |
| C | 1.30056300  | 2.03255000  | -3.27234500 |
| C | 0.37083900  | 0.03605500  | -4.35829300 |
| C | 2.33509600  | 2.74827400  | -2.58898300 |
| C | 0.12035600  | 2.77720800  | -3.65116000 |
| C | -0.79764300 | 0.79838300  | -4.74064400 |
| C | 2.20262800  | 4.07684600  | -2.27974500 |
| H | 3.24764000  | 2.22948800  | -2.31912400 |
| C | 0.01472000  | 4.15777600  | -3.29434800 |
| C | -0.89648800 | 2.13980000  | -4.36613900 |
| C | 1.02214000  | 4.79446500  | -2.62225400 |
| H | 3.00508300  | 4.58344100  | -1.75376400 |
| H | -0.89134000 | 4.69114600  | -3.57141100 |
| H | -1.78159100 | 2.70649200  | -4.64782700 |
| H | 0.92181100  | 5.83616300  | -2.33416000 |
| C | -0.59358900 | 1.10183700  | 4.46428100  |
| H | -0.53118800 | 2.18504100  | 4.41884900  |
| C | 0.45417400  | 0.33543100  | 4.02438300  |
| H | 1.34900600  | 0.81763900  | 3.64617800  |
| C | -1.77940500 | 0.49456200  | 4.96792400  |
| H | -2.59992700 | 1.12215300  | 5.30268500  |
| C | -1.87843900 | -0.86979600 | 5.01748900  |
| H | -2.77632300 | -1.34748000 | 5.40351800  |
| C | -0.58553600 | -1.90484800 | -5.49975500 |
| H | -0.51190900 | -2.94807200 | -5.79453800 |
| C | -1.73171700 | -1.14820800 | -5.87604100 |
| H | -2.51947400 | -1.61498900 | -6.46093200 |
| C | -1.83122100 | 0.16443200  | -5.49961300 |
| H | -2.69817300 | 0.75792500  | -5.78070500 |
| C | 0.42176500  | -1.33499200 | -4.76409400 |
| H | 1.28277900  | -1.92514600 | -4.48317100 |
| N | 0.77655800  | -2.45122400 | -1.17040500 |
| S | 1.46238000  | -4.02078800 | -1.12723300 |
| C | 1.23190100  | -4.54008700 | -2.91758900 |
| O | 0.60571100  | -4.91531500 | -0.36064100 |
| O | 2.90003800  | -3.93786400 | -0.92949400 |
| F | 1.41839700  | -5.85630300 | -2.97027800 |
| F | -0.00454500 | -4.24936000 | -3.33734300 |
| F | 2.12544600  | -3.93677800 | -3.69777900 |
| C | -3.85793900 | -1.32696500 | -0.36026200 |
| C | -3.43925500 | -1.48825100 | -1.68939700 |
| C | -3.52339500 | -2.36395000 | 0.53641100  |
| C | -2.76146100 | -2.63543400 | -2.11711600 |

|   |             |             |             |
|---|-------------|-------------|-------------|
| H | -3.63504400 | -0.71912900 | -2.42355400 |
| C | -2.84384400 | -3.50708200 | 0.12231900  |
| H | -3.80138000 | -2.28663800 | 1.58011000  |
| C | -2.46916900 | -3.65927000 | -1.21552700 |
| H | -2.46888600 | -2.71859900 | -3.16048600 |
| H | -2.59891900 | -4.27946200 | 0.84603100  |
| H | -1.95845700 | -4.56017000 | -1.54130100 |
| C | -6.11248100 | -0.46941300 | 0.53873500  |
| H | -6.59593500 | 0.47047700  | 0.83310300  |
| H | -6.60988000 | -0.77086500 | -0.38385300 |
| C | -6.38715000 | -1.48902800 | 1.63298900  |
| C | -6.73907100 | -2.76916700 | 1.38093600  |
| C | -8.08657800 | 2.47120400  | -2.38169100 |
| H | -8.06825600 | 3.49480200  | -2.78239800 |
| H | -8.19557700 | 1.78887400  | -3.22522900 |
| H | -9.00187100 | 2.39726900  | -1.77783200 |
| C | -7.05525900 | -3.76414600 | 2.47633600  |
| H | -8.06495700 | -4.17876100 | 2.34446800  |
| H | -6.36596000 | -4.61950900 | 2.42712200  |
| H | -6.99266200 | -3.34874200 | 3.48351600  |
| C | -6.33176500 | -0.95314800 | 3.06038400  |
| H | -5.47533500 | -1.34103600 | 3.62915800  |
| H | -6.24936900 | 0.13716800  | 3.06882100  |
| H | -7.23231900 | -1.20815700 | 3.63014600  |
| C | -5.96209600 | 0.38757400  | -2.98380800 |
| H | -5.07545900 | 0.55069600  | -3.61397500 |
| H | -5.94362400 | -0.67211500 | -2.69884500 |
| H | -6.83732400 | 0.53724500  | -3.61662500 |
| C | -6.86322200 | 3.16280200  | -0.32488400 |
| H | -6.98076400 | 4.20189400  | -0.66273400 |
| H | -7.72705100 | 2.95611000  | 0.32388000  |
| H | -5.96788800 | 3.12134200  | 0.29627500  |
| C | -6.84925600 | -3.38712500 | 0.00576300  |
| H | -6.65260600 | -2.69412700 | -0.81275400 |
| H | -6.13817200 | -4.21813400 | -0.09755400 |
| H | -7.85179600 | -3.81359800 | -0.14229300 |

INT-16-4

0 imaginary frequency

H = -5472.506757

G = -5472.726756

E(M06-2X-DCM) = -5473.478166

|   |            |             |            |
|---|------------|-------------|------------|
| C | 4.76715200 | -0.97836400 | 1.93037400 |
| C | 4.57584000 | -0.45337400 | 3.41335100 |

|   |              |              |              |
|---|--------------|--------------|--------------|
| H | 4. 37532100  | -1. 31696200 | 4. 05192000  |
| H | 5. 55991000  | -0. 08619200 | 3. 73009100  |
| C | 3. 58524000  | 0. 66967000  | 3. 72638200  |
| C | 4. 72651300  | 0. 17553200  | 0. 90436000  |
| H | 5. 03781100  | -0. 19727800 | -0. 07800200 |
| H | 5. 46087200  | 0. 93298100  | 1. 18798900  |
| N | 3. 42956300  | 0. 83288300  | 0. 77742300  |
| C | 3. 23224000  | 2. 04050200  | 0. 19861400  |
| N | 1. 88487400  | 2. 32503300  | 0. 05832800  |
| C | 1. 22847900  | 3. 50353400  | -0. 31825900 |
| C | 1. 78532700  | 4. 79000100  | -0. 24689100 |
| C | -0. 10947000 | 3. 36790500  | -0. 73051800 |
| C | 1. 01560200  | 5. 89784100  | -0. 60535400 |
| C | -0. 86190300 | 4. 48748500  | -1. 07111100 |
| H | -0. 56023200 | 2. 38262400  | -0. 75765500 |
| C | -0. 30811200 | 5. 76754800  | -1. 02067100 |
| H | -0. 89752600 | 6. 63981800  | -1. 27565400 |
| C | -2. 28262300 | 4. 31585500  | -1. 52983700 |
| C | 1. 65082700  | 7. 26459500  | -0. 57804100 |
| F | -3. 07737200 | 5. 32732200  | -1. 10470800 |
| F | -2. 82757300 | 3. 16186400  | -1. 07115900 |
| F | -2. 39192200 | 4. 28275900  | -2. 88043000 |
| F | 0. 73240000  | 8. 23962800  | -0. 38363300 |
| F | 2. 27815300  | 7. 54488900  | -1. 74309900 |
| F | 2. 57154600  | 7. 37547100  | 0. 40253800  |
| S | 4. 50911500  | 3. 02454200  | -0. 30427500 |
| H | 2. 80463400  | 4. 92035600  | 0. 08551400  |
| C | 2. 30233700  | 0. 46777300  | 4. 10224100  |
| H | 1. 27178400  | 1. 50932300  | 0. 06350200  |
| H | 2. 62865000  | 0. 36224100  | 1. 18002700  |
| H | -0. 35039900 | -2. 36619200 | 1. 03554100  |
| O | -2. 42778300 | 0. 19820300  | 0. 18104200  |
| O | -1. 72329300 | -1. 40230900 | -1. 73612400 |
| P | -1. 26128900 | -0. 79040200 | -0. 32331800 |
| O | 0. 04097900  | -0. 09252500 | -0. 21377900 |
| C | -6. 29066900 | -1. 27490500 | 0. 83684300  |
| C | -5. 83024900 | -1. 08034100 | -0. 46026100 |
| C | -4. 58887600 | -0. 46690200 | -0. 69602700 |
| C | -4. 22497300 | -0. 30282200 | 1. 71824700  |
| C | -5. 51142200 | -0. 83633100 | 1. 90716600  |
| C | -1. 96248300 | -0. 56623700 | -2. 84735000 |
| C | -3. 18505700 | 0. 08796800  | -2. 94265700 |
| C | -3. 36040100 | 1. 02752900  | -3. 97057300 |
| C | -2. 37383300 | 1. 22056300  | -4. 93232300 |

|   |             |             |             |
|---|-------------|-------------|-------------|
| C | -1.20725300 | 0.45817100  | -4.87691400 |
| C | -0.96514500 | -0.44677500 | -3.82993200 |
| H | -5.88928000 | -0.91865700 | 2.92168900  |
| H | -0.44930300 | 0.56811700  | -5.64652600 |
| C | -4.48709600 | -0.09914000 | -2.17491300 |
| C | -5.36620300 | -1.23288800 | -2.79853800 |
| H | -5.73099900 | -0.97238300 | -3.79698600 |
| H | -4.76273000 | -2.14354900 | -2.88229000 |
| H | -4.60251900 | 2.80751300  | -3.93191200 |
| H | -5.39512500 | 1.38947000  | -4.62049400 |
| C | -3.76132200 | -0.20453800 | 0.39212800  |
| H | -7.25645100 | -1.73880500 | 1.01983800  |
| H | -2.51267200 | 1.94631300  | -5.72923600 |
| C | -6.49689100 | -1.45052100 | -1.76787100 |
| H | -7.36164100 | -0.80508800 | -1.97395200 |
| H | -6.86722600 | -2.48172100 | -1.76347300 |
| C | -4.69720500 | 1.72014100  | -3.83899700 |
| C | -5.16766600 | 1.29204400  | -2.43189800 |
| H | -6.25605300 | 1.24094700  | -2.33683600 |
| H | -4.80028100 | 2.00843700  | -1.69323700 |
| C | 0.28101500  | -1.27356200 | -3.82189300 |
| C | 0.19176300  | -2.66725500 | -4.06668700 |
| C | 1.54194700  | -0.65536600 | -3.64657500 |
| C | -1.04737800 | -3.33990100 | -4.31596400 |
| C | 1.39931400  | -3.46047400 | -4.10266700 |
| C | 2.74225700  | -1.46030300 | -3.70293300 |
| C | -1.09347400 | -4.68871300 | -4.55295300 |
| H | -1.96633600 | -2.76456100 | -4.32554500 |
| C | 1.30654100  | -4.86659100 | -4.34530100 |
| C | 2.63689100  | -2.83677000 | -3.91808900 |
| C | 0.09698700  | -5.46852400 | -4.56147300 |
| H | -2.04947000 | -5.17091800 | -4.73811300 |
| H | 2.22630900  | -5.44662500 | -4.35984200 |
| H | 3.54327700  | -3.43796500 | -3.95375200 |
| H | 0.03959700  | -6.53767900 | -4.74613700 |
| C | -3.46740200 | 0.21236400  | 2.90352100  |
| C | -3.23861200 | 1.60768300  | 3.03560800  |
| C | -3.09406200 | -0.66843100 | 3.94864200  |
| C | -3.60454000 | 2.56169700  | 2.03308400  |
| C | -2.62967200 | 2.11824100  | 4.24393000  |
| C | -2.49488200 | -0.14108300 | 5.15402200  |
| C | -3.36177800 | 3.90124300  | 2.19297400  |
| H | -4.08225500 | 2.21645800  | 1.12512000  |
| C | -2.39947900 | 3.52366200  | 4.37545500  |



|   |             |             |             |
|---|-------------|-------------|-------------|
| C | -2.28492000 | 1.23432500  | 5.27012500  |
| C | -2.74820700 | 4.39363500  | 3.37877000  |
| H | -3.63118500 | 4.59331200  | 1.40079800  |
| H | -1.93662400 | 3.88397100  | 5.29103200  |
| H | -1.83818800 | 1.62836000  | 6.18057100  |
| H | -2.56260100 | 5.45851800  | 3.48749600  |
| C | 2.93426100  | 1.31667600  | -3.26325700 |
| H | 3.02810100  | 2.38085900  | -3.07213200 |
| C | 1.69570200  | 0.74907300  | -3.40801400 |
| H | 0.80975400  | 1.37007500  | -3.33778600 |
| C | 4.11344500  | 0.51991600  | -3.32953600 |
| H | 5.08156800  | 0.99321200  | -3.19785800 |
| C | 4.01579700  | -0.82912800 | -3.53818700 |
| H | 4.90691900  | -1.45093000 | -3.58480500 |
| C | -2.90556000 | -2.91489300 | 4.89549800  |
| H | -3.04895000 | -3.98717100 | 4.79841200  |
| C | -2.33031100 | -2.38793600 | 6.08640800  |
| H | -2.04927300 | -3.05958500 | 6.89291500  |
| C | -2.13058800 | -1.03924200 | 6.20609600  |
| H | -1.68928000 | -0.62117800 | 7.10782500  |
| C | -3.27412300 | -2.08593000 | 3.86786600  |
| H | -3.70695600 | -2.50289100 | 2.96794300  |
| N | -1.26352000 | -2.24415300 | 0.58926000  |
| S | -1.82892400 | -3.74536400 | -0.01467700 |
| C | -1.82792600 | -4.73539500 | 1.59965000  |
| O | -0.82294900 | -4.39531500 | -0.84484900 |
| O | -3.21336000 | -3.58891400 | -0.43290000 |
| F | -3.03132500 | -4.69030600 | 2.16484800  |
| F | -1.53501000 | -5.99518800 | 1.28901500  |
| F | -0.90829700 | -4.26160500 | 2.44382800  |
| C | 3.78583200  | -2.11968900 | 1.59108900  |
| C | 3.66627700  | -3.22463700 | 2.45608700  |
| C | 3.04687800  | -2.16360800 | 0.39845700  |
| C | 2.83694100  | -4.30410900 | 2.16193200  |
| H | 4.24235500  | -3.25542500 | 3.37668000  |
| C | 2.21261300  | -3.24665200 | 0.09444500  |
| H | 3.11576400  | -1.36031100 | -0.32568700 |
| C | 2.09736300  | -4.32040100 | 0.97671900  |
| H | 2.77532200  | -5.13769100 | 2.85704000  |
| H | 1.66910400  | -3.25535300 | -0.84560500 |
| H | 1.45255100  | -5.16013900 | 0.73458800  |
| C | 6.24686100  | -1.54736900 | 1.88546700  |
| H | 6.89624900  | -0.73164700 | 2.21513300  |
| H | 6.31246300  | -2.31591600 | 2.66641200  |

|   |            |             |             |
|---|------------|-------------|-------------|
| C | 6.76881300 | -2.13234900 | 0.58097000  |
| C | 7.55610000 | -1.43398800 | -0.26910000 |
| C | 1.33992000 | 1.57603900  | 4.47230200  |
| H | 1.07615800 | 1.51137000  | 5.53817700  |
| H | 1.71447000 | 2.58235800  | 4.28419300  |
| H | 0.39778400 | 1.46547500  | 3.92097300  |
| C | 8.06190900 | -1.99512800 | -1.58210000 |
| H | 9.15132300 | -2.14368200 | -1.55197600 |
| H | 7.59997700 | -2.94066900 | -1.86991000 |
| H | 7.87541200 | -1.27714900 | -2.39263700 |
| C | 6.39344000 | -3.58314200 | 0.32106400  |
| H | 7.15931500 | -4.11702200 | -0.24744600 |
| H | 6.26087100 | -4.11906600 | 1.26680400  |
| H | 5.44564600 | -3.68066400 | -0.22274700 |
| C | 4.23993800 | 2.03772400  | 3.70690600  |
| H | 5.02026600 | 2.08477700  | 4.48073900  |
| H | 4.73634900 | 2.24291300  | 2.75218800  |
| H | 3.55172200 | 2.86280800  | 3.89124600  |
| C | 1.64917600 | -0.89084000 | 4.22725900  |
| H | 1.16671400 | -0.99118800 | 5.20949300  |
| H | 0.84219100 | -1.00540800 | 3.48874000  |
| H | 2.33166800 | -1.72945300 | 4.09513900  |
| C | 8.03277200 | -0.01327100 | -0.05157500 |
| H | 7.93780100 | 0.34026800  | 0.97696300  |
| H | 9.09068100 | 0.07299900  | -0.33330400 |
| H | 7.48133100 | 0.69277200  | -0.68804500 |

TS-EF-7SS

l imaginary frequency

H = -5472.489608

G = -5472.703349

E(M06-2X-DCM) = -5473.464387

|   |            |             |             |
|---|------------|-------------|-------------|
| O | 1.13319200 | -2.91234500 | -0.10661500 |
| O | 3.04669000 | -1.18160200 | 0.00960500  |
| P | 1.42166500 | -1.29125500 | -0.10925400 |
| O | 0.81884500 | -0.59516000 | 1.06740100  |
| C | 2.42906000 | -5.05560100 | 3.25250000  |
| C | 3.28571700 | -4.82365400 | 2.18165600  |
| C | 2.83339300 | -4.15814000 | 1.03230100  |
| C | 0.63943300 | -3.88569000 | 2.06386800  |
| C | 1.11153900 | -4.60576700 | 3.17407600  |
| C | 3.84936800 | -1.68837500 | -1.01366000 |
| C | 4.10845300 | -3.05647800 | -1.07347300 |
| C | 4.74726800 | -3.58116100 | -2.20790600 |

|   |             |             |             |
|---|-------------|-------------|-------------|
| C | 5.23687300  | -2.73762900 | -3.19942900 |
| C | 5.09406600  | -1.35781000 | -3.04637100 |
| C | 4.39053900  | -0.80187400 | -1.96548000 |
| H | 0.42673200  | -4.79108200 | 3.99667200  |
| H | 5.51416600  | -0.68481400 | -3.78809500 |
| C | 3.91755300  | -4.16311600 | -0.03951100 |
| C | 5.19382200  | -4.29338300 | 0.86306900  |
| H | 5.46756800  | -3.29686100 | 1.22831000  |
| H | 6.05251500  | -4.69557000 | 0.31678400  |
| H | 5.79759300  | -5.46162100 | -1.92970200 |
| H | 4.47531500  | -5.55906400 | -3.08701300 |
| C | 1.53452300  | -3.65302200 | 1.00208500  |
| H | 2.77710600  | -5.57527100 | 4.14168100  |
| H | 5.73879100  | -3.14066900 | -4.07561900 |
| C | 4.75093900  | -5.17472600 | 2.04951500  |
| H | 5.31782000  | -4.97024800 | 2.96492100  |
| H | 4.88520600  | -6.24288100 | 1.82678300  |
| C | 4.78421500  | -5.09383400 | -2.14377100 |
| C | 3.81389000  | -5.40699400 | -0.98192900 |
| H | 2.78841100  | -5.47522200 | -1.36272900 |
| H | 4.04302300  | -6.34441000 | -0.46477600 |
| C | 4.29027100  | 0.68438600  | -1.82702800 |
| C | 3.59389400  | 1.45020900  | -2.79394500 |
| C | 4.96624500  | 1.32965000  | -0.75983400 |
| C | 2.87384900  | 0.86016900  | -3.88229700 |
| C | 3.57903800  | 2.89211200  | -2.68570300 |
| C | 4.92481400  | 2.77031600  | -0.65514900 |
| C | 2.22229500  | 1.63242400  | -4.80717700 |
| H | 2.81636800  | -0.21925000 | -3.94736800 |
| C | 2.88404700  | 3.66123200  | -3.67120100 |
| C | 4.23581200  | 3.51108600  | -1.61928200 |
| C | 2.23227300  | 3.05265200  | -4.70927700 |
| H | 1.66811000  | 1.15522600  | -5.61028400 |
| H | 2.88613700  | 4.74430400  | -3.57100300 |
| H | 4.20737900  | 4.59476100  | -1.53547800 |
| H | 1.70935300  | 3.64735800  | -5.45409600 |
| C | -0.78458300 | -3.42526600 | 2.05663500  |
| C | -1.20498600 | -2.42407300 | 2.96482000  |
| C | -1.72651600 | -4.05972100 | 1.21118900  |
| C | -0.29205500 | -1.71746600 | 3.81381300  |
| C | -2.60432200 | -2.07173500 | 3.04438100  |
| C | -3.12151800 | -3.69085400 | 1.29238400  |
| C | -0.72723300 | -0.75853600 | 4.69149100  |
| H | 0.76555300  | -1.93668800 | 3.73553200  |

|   |             |             |             |
|---|-------------|-------------|-------------|
| C | -3.01890700 | -1.07427400 | 3.98365700  |
| C | -3.52346600 | -2.71390900 | 2.20900400  |
| C | -2.11226400 | -0.43651000 | 4.78670100  |
| H | -0.00817700 | -0.22856100 | 5.31070900  |
| H | -4.07907000 | -0.83810900 | 4.04707700  |
| H | -4.57881700 | -2.45643100 | 2.28166000  |
| H | -2.44140600 | 0.31952200  | 5.49469600  |
| C | 6.35512200  | 1.27345800  | 1.25357400  |
| H | 6.91608400  | 0.70534100  | 1.99079700  |
| C | 5.72286800  | 0.62042000  | 0.22836500  |
| H | 5.79720700  | -0.45839500 | 0.15688200  |
| C | 6.28855800  | 2.69091500  | 1.36458600  |
| H | 6.79382900  | 3.19133900  | 2.18641800  |
| C | 5.59829200  | 3.41468900  | 0.43042700  |
| H | 5.54220100  | 4.49793200  | 0.49575400  |
| C | -2.30043000 | -5.69593300 | -0.51152600 |
| H | -1.99595700 | -6.47191000 | -1.20858800 |
| C | -3.67299600 | -5.32539400 | -0.43086500 |
| H | -4.40367400 | -5.82314600 | -1.06306500 |
| C | -4.06777100 | -4.35232200 | 0.44800800  |
| H | -5.11426200 | -4.06599500 | 0.52446300  |
| C | -1.36434600 | -5.08799100 | 0.28314500  |
| H | -0.32510500 | -5.38797600 | 0.21551100  |
| N | 1.06392500  | -0.81705500 | -1.61692900 |
| S | -0.39606300 | -0.65900200 | -2.17379700 |
| O | -0.54217500 | 0.50991100  | -3.05570400 |
| O | -1.47419100 | -0.85407400 | -1.15988600 |
| C | -0.60092800 | -2.12189800 | -3.31732100 |
| F | 0.35341200  | -2.10921900 | -4.25545500 |
| F | -1.79665600 | -2.05769900 | -3.92266900 |
| F | -0.52702500 | -3.26789300 | -2.63514200 |
| C | -5.31228100 | 1.33369500  | -0.61685900 |
| C | -5.15698100 | 2.75456600  | -1.27993700 |
| H | -5.42498300 | 3.48527200  | -0.51570300 |
| H | -5.92507700 | 2.84150700  | -2.06178200 |
| C | -3.85529700 | 3.15768600  | -1.91361000 |
| C | -4.25273700 | 1.15446500  | 0.50455100  |
| H | -4.45348800 | 1.90032900  | 1.27300600  |
| H | -4.39048400 | 0.17227100  | 0.96600500  |
| N | -2.82626800 | 1.28384300  | 0.16325500  |
| C | -1.97113500 | 2.10764800  | 0.81283400  |
| N | -0.69411700 | 1.71284500  | 0.94817400  |
| C | 0.37968100  | 2.53008900  | 1.41527300  |
| C | 0.73079800  | 3.70878500  | 0.75765400  |

|   |              |              |              |
|---|--------------|--------------|--------------|
| C | 1. 11458500  | 2. 09409100  | 2. 51825200  |
| C | 1. 78888400  | 4. 47734800  | 1. 23847200  |
| C | 2. 18194000  | 2. 86487000  | 2. 98025300  |
| H | 0. 85410700  | 1. 15865200  | 2. 99748900  |
| C | 2. 51802500  | 4. 06441000  | 2. 35446600  |
| H | 3. 34386800  | 4. 66077700  | 2. 72251900  |
| C | 3. 00731300  | 2. 36848900  | 4. 13876800  |
| C | 2. 10644500  | 5. 79147600  | 0. 57872900  |
| F | 2. 26416500  | 1. 64083200  | 5. 00622800  |
| F | 4. 02416600  | 1. 58053400  | 3. 73369000  |
| F | 3. 55265100  | 3. 39153500  | 4. 83606500  |
| F | 1. 45478700  | 6. 81994900  | 1. 16919900  |
| F | 3. 42738200  | 6. 08574900  | 0. 63878600  |
| F | 1. 75092000  | 5. 80275700  | -0. 72712100 |
| S | -2. 50531100 | 3. 66610700  | 1. 37230600  |
| H | 0. 19014900  | 4. 01871100  | -0. 12673200 |
| H | -0. 42763800 | 0. 71515600  | 0. 84623100  |
| H | -2. 38516600 | 0. 47578800  | -0. 30226600 |
| C | -3. 22887400 | 4. 36013500  | -1. 51992500 |
| H | -2. 93493200 | 3. 96226600  | -0. 30464100 |
| C | -6. 71318700 | 1. 40716100  | 0. 12463400  |
| H | -7. 47315600 | 1. 55967500  | -0. 65201700 |
| H | -6. 70662400 | 2. 32229800  | 0. 72280600  |
| C | -5. 35419500 | 0. 20206900  | -1. 65900900 |
| C | -4. 58505700 | -0. 96229400 | -1. 54984800 |
| C | -6. 23809000 | 0. 29285400  | -2. 75162700 |
| C | -4. 67308700 | -1. 98406200 | -2. 50070500 |
| H | -3. 89051300 | -1. 10364200 | -0. 73271200 |
| C | -6. 33555300 | -0. 72464200 | -3. 69768300 |
| H | -6. 87030500 | 1. 16897800  | -2. 87355900 |
| C | -5. 54723700 | -1. 87154300 | -3. 57813600 |
| H | -4. 04276300 | -2. 85985100 | -2. 38790800 |
| H | -7. 02753800 | -0. 61949500 | -4. 52930700 |
| H | -5. 61307100 | -2. 66294400 | -4. 31957500 |
| C | -7. 14279500 | 0. 22781400  | 0. 98717000  |
| C | -7. 08104800 | 0. 24981200  | 2. 33875300  |
| C | -7. 72493300 | -0. 94999600 | 0. 22237300  |
| H | -8. 24371200 | -0. 60175400 | -0. 67714400 |
| H | -6. 95214800 | -1. 64680800 | -0. 12429700 |
| H | -8. 44719800 | -1. 51756500 | 0. 81322500  |
| C | -7. 51698200 | -0. 91074500 | 3. 21048800  |
| H | -6. 75852200 | -1. 11302800 | 3. 97875300  |
| H | -8. 44130000 | -0. 66465200 | 3. 75329500  |
| H | -7. 68390100 | -1. 84063900 | 2. 66553000  |

|   |             |            |             |
|---|-------------|------------|-------------|
| C | -3.24956600 | 2.30614900 | -2.98444300 |
| H | -2.26721000 | 1.89635000 | -2.71652600 |
| H | -3.88518700 | 1.46553600 | -3.25418800 |
| H | -3.07512200 | 2.92450500 | -3.87613300 |
| C | -1.92077400 | 4.75484100 | -2.20091300 |
| H | -2.11087800 | 5.18814400 | -3.19192500 |
| H | -1.40111000 | 5.51587500 | -1.60981600 |
| H | -1.24167100 | 3.90892700 | -2.33654400 |
| C | -4.04456600 | 5.59339000 | -1.09268300 |
| H | -4.94835300 | 5.35870900 | -0.52884200 |
| H | -3.42310200 | 6.24393700 | -0.46935100 |
| H | -4.33593800 | 6.16098900 | -1.98480900 |
| C | -6.58600500 | 1.41037700 | 3.17632400  |
| H | -5.61483000 | 1.17737900 | 3.63559700  |
| H | -6.46992100 | 2.34954600 | 2.63235400  |
| H | -7.28117500 | 1.59505200 | 4.00625300  |

TS-EF-7SS-1

1 imaginary frequency

H = -5472.489605

G = -5472.703337

E(M06-2X-DCM) = -5473.464388

|   |            |             |             |
|---|------------|-------------|-------------|
| O | 1.13340800 | -2.91239300 | -0.10669200 |
| O | 3.04676400 | -1.18151700 | 0.00961100  |
| P | 1.42174500 | -1.29127700 | -0.10926100 |
| O | 0.81886800 | -0.59526900 | 1.06741600  |
| C | 2.42925700 | -5.05545000 | 3.25255300  |
| C | 3.28595500 | -4.82347300 | 2.18174900  |
| C | 2.83363700 | -4.15804500 | 1.03234200  |
| C | 0.63959600 | -3.88574200 | 2.06377300  |
| C | 1.11169800 | -4.60573700 | 3.17403500  |
| C | 3.84950200 | -1.68825300 | -1.01362300 |
| C | 4.10869600 | -3.05633800 | -1.07339800 |
| C | 4.74760200 | -3.58099500 | -2.20779200 |
| C | 5.23717200 | -2.73744600 | -3.19931800 |
| C | 5.09425400 | -1.35763400 | -3.04629400 |
| C | 4.39065100 | -0.80173200 | -1.96543700 |
| H | 0.42686000 | -4.79108100 | 3.99659900  |
| H | 5.51433700 | -0.68462100 | -3.78801300 |
| C | 3.91785200 | -4.16296300 | -0.03941200 |
| C | 5.19408500 | -4.29308000 | 0.86323900  |
| H | 5.46772800 | -3.29652000 | 1.22845100  |
| H | 6.05284000 | -4.69521900 | 0.31701700  |
| H | 5.79810000 | -5.46134000 | -1.92948700 |

|   |              |              |              |
|---|--------------|--------------|--------------|
| H | 4. 47587800  | -5. 55895300 | -3. 08684600 |
| C | 1. 53472800  | -3. 65303300 | 1. 00203700  |
| H | 2. 77729700  | -5. 57505100 | 4. 14177700  |
| H | 5. 73915800  | -3. 14046600 | -4. 07547900 |
| C | 4. 75121900  | -5. 17441000 | 2. 04970500  |
| H | 5. 31802900  | -4. 96983000 | 2. 96513200  |
| H | 4. 88560300  | -6. 24256300 | 1. 82703500  |
| C | 4. 78469300  | -5. 09366200 | -2. 14360700 |
| C | 3. 81435400  | -5. 40688200 | -0. 98179400 |
| H | 2. 78889800  | -5. 47523000 | -1. 36263200 |
| H | 4. 04356200  | -6. 34425700 | -0. 46459800 |
| C | 4. 29030500  | 0. 68452100  | -1. 82697600 |
| C | 3. 59388200  | 1. 45032300  | -2. 79387500 |
| C | 4. 96622900  | 1. 32979900  | -0. 75976000 |
| C | 2. 87388900  | 0. 86026700  | -3. 88225300 |
| C | 3. 57892100  | 2. 89222200  | -2. 68558400 |
| C | 4. 92468900  | 2. 77045600  | -0. 65502300 |
| C | 2. 22228200  | 1. 63250700  | -4. 80710900 |
| H | 2. 81648800  | -0. 21915400 | -3. 94736100 |
| C | 2. 88387500  | 3. 66132400  | -3. 67105600 |
| C | 4. 23564100  | 3. 51120700  | -1. 61913700 |
| C | 2. 23214800  | 3. 05273200  | -4. 70915400 |
| H | 1. 66814100  | 1. 15529700  | -5. 61023900 |
| H | 2. 88587800  | 4. 74439300  | -3. 57081500 |
| H | 4. 20713100  | 4. 59487600  | -1. 53529800 |
| H | 1. 70918200  | 3. 64742600  | -5. 45395100 |
| C | -0. 78445700 | -3. 42543900 | 2. 05641600  |
| C | -1. 20502400 | -2. 42426500 | 2. 96454500  |
| C | -1. 72626100 | -4. 05998500 | 1. 21089200  |
| C | -0. 29223000 | -1. 71757400 | 3. 81361700  |
| C | -2. 60439500 | -2. 07203600 | 3. 04396500  |
| C | -3. 12129800 | -3. 69122500 | 1. 29194600  |
| C | -0. 72756900 | -0. 75866600 | 4. 69123800  |
| H | 0. 76540200  | -1. 93671500 | 3. 73544100  |
| C | -3. 01914900 | -1. 07459400 | 3. 98318700  |
| C | -3. 52340900 | -2. 71429400 | 2. 20851100  |
| C | -2. 11263400 | -0. 43674700 | 4. 78631000  |
| H | -0. 00861600 | -0. 22863000 | 5. 31052500  |
| H | -4. 07933600 | -0. 83851300 | 4. 04649900  |
| H | -4. 57878500 | -2. 45689500 | 2. 28106300  |
| H | -2. 44190400 | 0. 31926600  | 5. 49426600  |
| C | 6. 35509000  | 1. 27363600  | 1. 25366100  |
| H | 6. 91608900  | 0. 70553400  | 1. 99086700  |
| C | 5. 72289700  | 0. 62058800  | 0. 22842100  |

|   |             |             |             |
|---|-------------|-------------|-------------|
| H | 5.79732100  | -0.45821800 | 0.15689600  |
| C | 6.28840700  | 2.69108300  | 1.36473000  |
| H | 6.79362100  | 3.19151500  | 2.18659300  |
| C | 5.59809900  | 3.41483800  | 0.43059000  |
| H | 5.54191800  | 4.49807400  | 0.49595800  |
| C | -2.29988700 | -5.69627500 | -0.51184600 |
| H | -1.99528800 | -6.47224300 | -1.20886300 |
| C | -3.67248800 | -5.32583800 | -0.43132400 |
| H | -4.40306800 | -5.82365700 | -1.06358500 |
| C | -4.06742100 | -4.35277900 | 0.44749300  |
| H | -5.11394000 | -4.06652600 | 0.52383900  |
| C | -1.36392500 | -5.08824600 | 0.28290300  |
| H | -0.32465500 | -5.38815600 | 0.21537300  |
| N | 1.06397000  | -0.81705800 | -1.61692300 |
| S | -0.39604200 | -0.65892200 | -2.17370300 |
| O | -0.54222000 | 0.51016000  | -3.05537900 |
| O | -1.47414000 | -0.85421800 | -1.15980300 |
| C | -0.60091000 | -2.12160000 | -3.31749800 |
| F | 0.35328400  | -2.10862600 | -4.25577500 |
| F | -1.79674000 | -2.05740000 | -3.92265000 |
| F | -0.52678300 | -3.26772600 | -2.63556700 |
| C | -5.31240000 | 1.33352700  | -0.61664700 |
| C | -5.15716200 | 2.75437800  | -1.27979400 |
| H | -5.42501300 | 3.48511400  | -0.51553800 |
| H | -5.92538300 | 2.84130900  | -2.06151800 |
| C | -3.85557000 | 3.15742600  | -1.91369500 |
| C | -4.25273300 | 1.15429200  | 0.50464800  |
| H | -4.45344100 | 1.90012300  | 1.27314500  |
| H | -4.39041800 | 0.17208100  | 0.96608400  |
| N | -2.82629600 | 1.28372100  | 0.16324700  |
| C | -1.97116100 | 2.10757900  | 0.81277000  |
| N | -0.69413800 | 1.71278000  | 0.94811400  |
| C | 0.37964100  | 2.53005700  | 1.41519600  |
| C | 0.73072700  | 3.70874700  | 0.75755000  |
| C | 1.11453200  | 2.09412500  | 2.51820800  |
| C | 1.78874300  | 4.47738800  | 1.23839500  |
| C | 2.18183000  | 2.86497400  | 2.98022700  |
| H | 0.85408100  | 1.15868900  | 2.99746400  |
| C | 2.51786300  | 4.06452400  | 2.35443100  |
| H | 3.34364200  | 4.66095900  | 2.72251900  |
| C | 3.00718100  | 2.36867000  | 4.13879200  |
| C | 2.10624900  | 5.79152400  | 0.57863600  |
| F | 2.26404300  | 1.64096200  | 5.00621700  |
| F | 4.02412200  | 1.58079100  | 3.73378200  |



|   |             |             |             |
|---|-------------|-------------|-------------|
| F | 3.55239700  | 3.39176700  | 4.83611000  |
| F | 1.45462400  | 6.81998900  | 1.16915500  |
| F | 3.42719000  | 6.08581300  | 0.63861100  |
| F | 1.75064600  | 5.80281000  | -0.72719300 |
| S | -2.50534800 | 3.66606700  | 1.37210500  |
| H | 0.19010400  | 4.01861100  | -0.12687300 |
| H | -0.42766900 | 0.71508700  | 0.84623800  |
| H | -2.38518300 | 0.47564800  | -0.30222800 |
| C | -3.22902700 | 4.35986200  | -1.52011600 |
| H | -2.93507000 | 3.96209000  | -0.30503300 |
| C | -6.71321400 | 1.40706000  | 0.12501100  |
| H | -7.47327100 | 1.55956000  | -0.65155500 |
| H | -6.70655900 | 2.32222700  | 0.72313400  |
| C | -5.35446200 | 0.20189100  | -1.65878000 |
| C | -4.58519500 | -0.96240600 | -1.54981200 |
| C | -6.23860900 | 0.29262100  | -2.75120000 |
| C | -4.67334000 | -1.98416000 | -2.50067700 |
| H | -3.89045100 | -1.10370900 | -0.73284000 |
| C | -6.33619100 | -0.72486400 | -3.69725500 |
| H | -6.87092800 | 1.16869300  | -2.87297300 |
| C | -5.54774200 | -1.87169500 | -3.57791000 |
| H | -4.04290600 | -2.85989100 | -2.38804300 |
| H | -7.02837200 | -0.61976400 | -4.52872100 |
| H | -5.61367000 | -2.66308500 | -4.31935300 |
| C | -7.14277300 | 0.22776900  | 0.98766100  |
| C | -7.08077800 | 0.24981500  | 2.33923600  |
| C | -7.51663900 | -0.91063200 | 3.21115400  |
| H | -8.44072400 | -0.66434000 | 3.75426600  |
| H | -7.68391200 | -1.84052100 | 2.66630000  |
| H | -6.75795700 | -1.11303000 | 3.97917100  |
| C | -1.92100000 | 4.75444200  | -2.20132800 |
| H | -1.40126800 | 5.51557700  | -1.61042300 |
| H | -1.24191900 | 3.90849700  | -2.33687800 |
| H | -2.11121300 | 5.18756100  | -3.19239800 |
| C | -3.24999700 | 2.30581400  | -2.98454800 |
| H | -3.88566300 | 1.46519100  | -3.25414500 |
| H | -3.07569300 | 2.92413000  | -3.87629500 |
| H | -2.26760100 | 1.89603400  | -2.71675200 |
| C | -7.72516200 | -0.94995500 | 0.22294300  |
| H | -8.24476800 | -0.60153500 | -0.67603700 |
| H | -6.95243900 | -1.64639100 | -0.12460500 |
| H | -8.44678500 | -1.51796500 | 0.81414400  |
| C | -4.04461000 | 5.59321800  | -1.09293700 |
| H | -4.94833700 | 5.35865000  | -0.52895500 |

|   |             |            |             |
|---|-------------|------------|-------------|
| H | -3.42303300 | 6.24380100 | -0.46975900 |
| H | -4.33606200 | 6.16071000 | -1.98510400 |
| C | -6.58544700 | 1.41037700 | 3.17664800  |
| H | -5.61424000 | 1.17727000 | 3.63579700  |
| H | -6.46929900 | 2.34948900 | 2.63259500  |
| H | -7.28047000 | 1.59521000 | 4.00666400  |

TS-EF-7SS-2

l imaginary frequency

H = -5472.478282

G = -5472.691983

E(M06-2X-DCM) = -5473.459087

|   |            |             |             |
|---|------------|-------------|-------------|
| O | 2.53791300 | -1.38140600 | -0.39501600 |
| O | 1.74115400 | 0.72384000  | -1.69522600 |
| P | 1.26150100 | -0.37950200 | -0.56767100 |
| O | 0.90931600 | 0.41125700  | 0.65553700  |
| C | 6.43389700 | -0.05341900 | 0.38141400  |
| C | 5.90796300 | 0.00809600  | -0.90405300 |
| C | 4.62744200 | -0.49600600 | -1.18320100 |
| C | 4.35379600 | -1.07209100 | 1.17686600  |
| C | 5.66823400 | -0.62197000 | 1.39638000  |
| C | 1.90041900 | 0.30690800  | -3.01763200 |
| C | 3.05614600 | -0.37447100 | -3.38975400 |
| C | 3.11840600 | -0.97619100 | -4.65706000 |
| C | 2.10092300 | -0.78304600 | -5.58413200 |
| C | 1.01927700 | 0.02918500  | -5.24160800 |
| C | 0.88627300 | 0.57925300  | -3.95692000 |
| H | 6.08207600 | -0.71524100 | 2.39575900  |
| H | 0.24092700 | 0.23061600  | -5.97178000 |
| C | 4.40589400 | -0.51697500 | -2.69452700 |
| C | 5.35730000 | 0.65178300  | -3.12698700 |
| H | 4.83071200 | 1.60311900  | -2.98521700 |
| H | 5.64671600 | 0.58642100  | -4.18003300 |
| H | 5.10465900 | -1.32746400 | -5.46364200 |
| H | 4.17838300 | -2.80080400 | -5.19842600 |
| C | 3.83563500 | -0.95839600 | -0.13001700 |
| H | 7.43302100 | 0.31957500  | 0.59281400  |
| H | 2.14764200 | -1.24438900 | -6.56730800 |
| C | 6.54967000 | 0.56740000  | -2.15389000 |
| H | 7.02897400 | 1.53838300  | -1.98273500 |
| H | 7.33071800 | -0.10554600 | -2.53487700 |
| C | 4.37907300 | -1.80394200 | -4.78958200 |
| C | 4.90266700 | -1.85557000 | -3.33623300 |
| H | 4.43345400 | -2.69165500 | -2.80802400 |

|   |             |             |             |
|---|-------------|-------------|-------------|
| H | 5.98833500  | -1.97659600 | -3.26812200 |
| C | -0.26235700 | 1.49403000  | -3.66883900 |
| C | -1.59321800 | 1.00901300  | -3.67532900 |
| C | -0.01134600 | 2.88068900  | -3.50507000 |
| C | -1.90929800 | -0.38213800 | -3.80576700 |
| C | -2.69322700 | 1.93786100  | -3.52837200 |
| C | -1.11977400 | 3.79324700  | -3.33711600 |
| C | -3.20853200 | -0.81760400 | -3.82103200 |
| H | -1.10262400 | -1.10153500 | -3.85419100 |
| C | -4.03500000 | 1.44271700  | -3.56468100 |
| C | -2.42725900 | 3.29861800  | -3.35663300 |
| C | -4.28898100 | 0.10554000  | -3.71615600 |
| H | -3.41784000 | -1.88079700 | -3.87972400 |
| H | -4.85002700 | 2.15683700  | -3.46950000 |
| H | -3.25903900 | 3.99267100  | -3.24994900 |
| H | -5.31049500 | -0.26315700 | -3.73278800 |
| C | 3.61312100  | -1.68719300 | 2.32189200  |
| C | 3.40185900  | -0.93091100 | 3.50373300  |
| C | 3.24254000  | -3.05607200 | 2.28044400  |
| C | 3.72768200  | 0.46147800  | 3.61041400  |
| C | 2.83807500  | -1.57051100 | 4.67182000  |
| C | 2.62679900  | -3.66443000 | 3.43873600  |
| C | 3.58274600  | 1.14480300  | 4.79046300  |
| H | 4.08515700  | 0.98504700  | 2.73167700  |
| C | 2.70130400  | -0.82190200 | 5.88372700  |
| C | 2.45141400  | -2.91098100 | 4.60197000  |
| C | 3.07837200  | 0.49338000  | 5.95234900  |
| H | 3.83968800  | 2.19964700  | 4.83422300  |
| H | 2.29981700  | -1.33081200 | 6.75750900  |
| H | 2.01834700  | -3.38573900 | 5.48046400  |
| H | 2.98582700  | 1.04456300  | 6.88491000  |
| C | 1.51588400  | 4.79068700  | -3.38809800 |
| H | 2.52727700  | 5.18698300  | -3.42222800 |
| C | 1.30625200  | 3.44398600  | -3.53561100 |
| H | 2.15215600  | 2.78553600  | -3.69504400 |
| C | 0.41995000  | 5.68157800  | -3.20721900 |
| H | 0.60281900  | 6.74795400  | -3.10408100 |
| C | -0.85838800 | 5.19152300  | -3.18679500 |
| H | -1.70628200 | 5.86154000  | -3.07000800 |
| C | 3.10094800  | -5.21152100 | 1.13849200  |
| H | 3.28078800  | -5.81707800 | 0.25472100  |
| C | 2.46228300  | -5.79386800 | 2.26860200  |
| H | 2.15797600  | -6.83634900 | 2.23799300  |
| C | 2.23976200  | -5.03993000 | 3.38761100  |

|   |             |             |             |
|---|-------------|-------------|-------------|
| H | 1.76499000  | -5.47297800 | 4.26489100  |
| C | 3.48151100  | -3.89622500 | 1.14690300  |
| H | 3.96903300  | -3.47948800 | 0.27500000  |
| N | 0.08524200  | -1.25879100 | -1.23983900 |
| S | -0.22538500 | -2.82749500 | -1.14141500 |
| O | -1.55931900 | -3.06780700 | -1.70587400 |
| O | 0.11876000  | -3.43814000 | 0.15098100  |
| C | 0.90035300  | -3.66282700 | -2.39011900 |
| F | 0.81410000  | -3.05296300 | -3.58163700 |
| F | 0.51547100  | -4.93537700 | -2.53245600 |
| F | 2.18560300  | -3.65315600 | -2.00218200 |
| C | -0.81213900 | 3.93314700  | 2.40577400  |
| C | -1.12060900 | 3.32670700  | 3.83086100  |
| H | -2.06541700 | 3.75619500  | 4.16101200  |
| H | -0.36139900 | 3.70385700  | 4.52926400  |
| C | -1.15596200 | 1.83731500  | 4.02008400  |
| C | -1.68787600 | 3.22995800  | 1.33927100  |
| H | -2.73659900 | 3.40499600  | 1.57939400  |
| H | -1.50266800 | 3.69053700  | 0.36358200  |
| N | -1.52186100 | 1.77593300  | 1.20391600  |
| C | -2.54024100 | 0.89231600  | 1.13234800  |
| N | -2.32646300 | -0.26531900 | 0.48698000  |
| C | -3.24292400 | -1.37042400 | 0.45971300  |
| C | -2.96517900 | -2.51049900 | 1.21095300  |
| C | -4.35441300 | -1.32315300 | -0.37672800 |
| C | -3.82308600 | -3.60743100 | 1.13128300  |
| C | -5.20020200 | -2.42923900 | -0.45518500 |
| H | -4.54388600 | -0.43772300 | -0.97164600 |
| C | -4.94247500 | -3.57231800 | 0.30050100  |
| H | -5.60798500 | -4.42552500 | 0.24506600  |
| C | -6.35557200 | -2.39815400 | -1.41923100 |
| C | -3.50930400 | -4.86200200 | 1.90484600  |
| F | -5.95644200 | -2.67621200 | -2.68555000 |
| F | -7.30966300 | -3.29750200 | -1.10059200 |
| F | -6.94048300 | -1.17892900 | -1.46129300 |
| F | -2.81506100 | -4.59126500 | 3.03293000  |
| F | -4.64148800 | -5.50853700 | 2.27348800  |
| F | -2.77775900 | -5.73107700 | 1.18245100  |
| S | -4.03438600 | 1.17579200  | 1.97729900  |
| H | -2.07515600 | -2.55374000 | 1.82756200  |
| H | -1.46670600 | -0.39780700 | -0.06379600 |
| H | -0.60227100 | 1.42063300  | 0.88603900  |
| C | -2.31856300 | 1.20637800  | 4.51501200  |
| H | -2.99307000 | 1.25284900  | 3.38905500  |

|   |             |             |             |
|---|-------------|-------------|-------------|
| C | -1.33089900 | 5.42836600  | 2.50460200  |
| H | -0.70543100 | 5.92724500  | 3.25652100  |
| H | -2.33634000 | 5.38555800  | 2.93056900  |
| C | 0.69331000  | 3.94208200  | 2.07598600  |
| C | 1.61511700  | 4.44272100  | 3.01532200  |
| C | 1.19916600  | 3.54642700  | 0.83137800  |
| C | 2.97473700  | 4.53591200  | 2.72681800  |
| H | 1.27406800  | 4.78518000  | 3.98917300  |
| C | 2.56324100  | 3.62801900  | 0.53900900  |
| H | 0.54908000  | 3.15994400  | 0.05664000  |
| C | 3.45856000  | 4.12369300  | 1.48239600  |
| H | 3.65541900  | 4.93544500  | 3.47442800  |
| H | 2.90888500  | 3.28991100  | -0.43268900 |
| H | 4.51922800  | 4.18924600  | 1.25594600  |
| C | -1.34864500 | 6.28749400  | 1.25096300  |
| C | -2.48908500 | 6.59348900  | 0.59230900  |
| C | -0.01012000 | 6.87439400  | 0.82224200  |
| H | 0.74501400  | 6.74484400  | 1.60096900  |
| H | 0.38284000  | 6.39301300  | -0.08181400 |
| H | -0.08632200 | 7.94756900  | 0.61551600  |
| C | 0.08902600  | 1.05682100  | 3.74560400  |
| H | -0.09739400 | 0.11688400  | 3.22174200  |
| H | 0.82472800  | 1.61453200  | 3.17112300  |
| H | 0.54489600  | 0.78542400  | 4.71076300  |
| C | -2.25345800 | -0.27692000 | 4.87941400  |
| H | -1.74120300 | -0.41790500 | 5.83987500  |
| H | -3.26435900 | -0.68267100 | 4.97901300  |
| H | -1.72844800 | -0.87719900 | 4.13338200  |
| C | -2.50381000 | 7.51222100  | -0.61162400 |
| H | -3.17500000 | 7.11902900  | -1.38620900 |
| H | -2.89734100 | 8.50297800  | -0.33919100 |
| H | -1.52146000 | 7.65406000  | -1.06424600 |
| C | -3.87844300 | 6.11247100  | 0.94909600  |
| H | -4.26231400 | 5.43062600  | 0.17713600  |
| H | -3.95191000 | 5.59269300  | 1.90616800  |
| H | -4.57483200 | 6.96169200  | 0.98106300  |
| C | -3.34198600 | 1.95808900  | 5.38337600  |
| H | -3.58061600 | 2.96102300  | 5.02601700  |
| H | -4.27768600 | 1.39129200  | 5.40554400  |
| H | -2.97515100 | 2.03751200  | 6.41396500  |

TS-EF-7SS-3

l imaginary frequency

H = -5472.487369

G = -5472.700788

E(M06-2X-DCM) = -5473.463181

|   |            |             |             |
|---|------------|-------------|-------------|
| O | 0.89330600 | -2.96334200 | -0.15961700 |
| O | 2.91796700 | -1.35776900 | -0.15090100 |
| P | 1.28412800 | -1.36421500 | -0.18341600 |
| O | 0.79265000 | -0.63162700 | 1.02287800  |
| C | 2.30325000 | -5.26260100 | 3.04716800  |
| C | 3.08486800 | -5.06535500 | 1.91384500  |
| C | 2.59119300 | -4.34108600 | 0.81823700  |
| C | 0.51208000 | -3.94233500 | 2.03097800  |
| C | 1.02012600 | -4.71873500 | 3.08605800  |
| C | 3.62657600 | -1.88432000 | -1.23183300 |
| C | 3.78105200 | -3.26411400 | -1.34973000 |
| C | 4.30408500 | -3.79301700 | -2.53994300 |
| C | 4.79156800 | -2.95183600 | -3.53464700 |
| C | 4.76739900 | -1.57169500 | -3.32690700 |
| C | 4.17769200 | -1.00566500 | -2.18501300 |
| H | 0.39277800 | -4.87419400 | 3.95911400  |
| H | 5.19280300 | -0.90498000 | -4.07132900 |
| C | 3.58617200 | -4.38871600 | -0.33624700 |
| C | 4.91614000 | -4.63450800 | 0.45925800  |
| H | 5.28826200 | -3.67059600 | 0.82508000  |
| H | 5.69864700 | -5.07909600 | -0.16318800 |
| H | 5.22685200 | -5.75427800 | -2.39729000 |
| H | 3.82118400 | -5.71326100 | -3.45530200 |
| C | 1.33226500 | -3.74774800 | 0.90301200  |
| H | 2.68376700 | -5.82700000 | 3.89479600  |
| H | 5.20370000 | -3.35805300 | -4.45508400 |
| C | 4.50509300 | -5.51637800 | 1.65608400  |
| H | 5.15592400 | -5.38020600 | 2.52729200  |
| H | 4.54199600 | -6.58438300 | 1.39791100  |
| C | 4.23139200 | -5.30595500 | -2.52395300 |
| C | 3.32574100 | -5.58977100 | -1.30308800 |
| H | 2.27344500 | -5.57374000 | -1.60901300 |
| H | 3.52371400 | -6.55777100 | -0.83130200 |
| C | 4.21022200 | 0.47672000  | -1.98369800 |
| C | 3.51764300 | 1.33941100  | -2.86822600 |
| C | 5.00869200 | 1.01675900  | -0.94271800 |
| C | 2.67961100 | 0.85884300  | -3.92522100 |
| C | 3.63190600 | 2.77165200  | -2.70317800 |
| C | 5.09864200 | 2.44999800  | -0.78136500 |
| C | 2.03331900 | 1.72204700  | -4.77004800 |
| H | 2.52963200 | -0.20855500 | -4.02883500 |
| C | 2.93691300 | 3.63810500  | -3.60424800 |

|   |              |              |              |
|---|--------------|--------------|--------------|
| C | 4. 41163300  | 3. 28681500  | -1. 66484100 |
| C | 2. 16719800  | 3. 13098100  | -4. 61607100 |
| H | 1. 38738800  | 1. 32753500  | -5. 54885300 |
| H | 3. 03584900  | 4. 71180700  | -3. 46130600 |
| H | 4. 48335000  | 4. 36433400  | -1. 53924400 |
| H | 1. 64621700  | 3. 79890000  | -5. 29762300 |
| C | -0. 87260000 | -3. 38682700 | 2. 15295200  |
| C | -1. 14221200 | -2. 37373000 | 3. 10409200  |
| C | -1. 92689100 | -3. 94778100 | 1. 39286800  |
| C | -0. 11123800 | -1. 74060200 | 3. 87171200  |
| C | -2. 50250400 | -1. 93381900 | 3. 31603700  |
| C | -3. 28182900 | -3. 49205000 | 1. 60583900  |
| C | -0. 40060000 | -0. 76862000 | 4. 79405600  |
| H | 0. 91811300  | -2. 02722600 | 3. 69507000  |
| C | -2. 76333400 | -0. 92543200 | 4. 29782000  |
| C | -3. 53371600 | -2. 50484000 | 2. 56400600  |
| C | -1. 74696200 | -0. 35891600 | 5. 01848600  |
| H | 0. 40525400  | -0. 29454300 | 5. 34792700  |
| H | -3. 79482100 | -0. 62026100 | 4. 46122100  |
| H | -4. 56007000 | -2. 18563000 | 2. 73806600  |
| H | -1. 95982500 | 0. 40733400  | 5. 75918100  |
| C | 6. 51959200  | 0. 75851400  | 0. 96444100  |
| H | 7. 07777400  | 0. 11430300  | 1. 63851100  |
| C | 5. 76585700  | 0. 20516400  | -0. 03709200 |
| H | 5. 74202300  | -0. 87201500 | -0. 15353800 |
| C | 6. 58343100  | 2. 17048000  | 1. 13239900  |
| H | 7. 18421300  | 2. 59124200  | 1. 93437100  |
| C | 5. 89670400  | 2. 98876300  | 0. 27694400  |
| H | 5. 93826200  | 4. 06918100  | 0. 38627300  |
| C | -2. 76101800 | -5. 52257300 | -0. 28006700 |
| H | -2. 57266700 | -6. 30710200 | -1. 00788500 |
| C | -4. 09380800 | -5. 06737400 | -0. 06908500 |
| H | -4. 91024500 | -5. 51099000 | -0. 63306500 |
| C | -4. 34250400 | -4. 08156700 | 0. 84850500  |
| H | -5. 35677000 | -3. 72982700 | 1. 02376100  |
| C | -1. 71850000 | -4. 98455100 | 0. 42771300  |
| H | -0. 71098400 | -5. 34745400 | 0. 26075000  |
| N | 0. 87742000  | -0. 87227900 | -1. 67223600 |
| S | -0. 59443000 | -0. 60674500 | -2. 15592100 |
| O | -0. 67835100 | 0. 51804200  | -3. 09943100 |
| O | -1. 61964800 | -0. 63865600 | -1. 07223900 |
| C | -1. 01437600 | -2. 10195600 | -3. 19590000 |
| F | -0. 10420000 | -2. 25623300 | -4. 16457400 |
| F | -2. 21826300 | -1. 93366300 | -3. 76258100 |

|   |             |             |             |
|---|-------------|-------------|-------------|
| F | -1.04437900 | -3.20755800 | -2.44613700 |
| C | -5.15718300 | 1.80158700  | -0.35025200 |
| C | -4.92204500 | 3.21341500  | -1.00560500 |
| H | -5.14814200 | 3.95010900  | -0.23422800 |
| H | -5.68346100 | 3.36013400  | -1.78476200 |
| C | -3.59923700 | 3.55138700  | -1.63487000 |
| C | -4.08592100 | 1.57190200  | 0.74766100  |
| H | -4.20497000 | 2.34581300  | 1.50595900  |
| H | -4.26976700 | 0.60970200  | 1.23252000  |
| N | -2.67082200 | 1.59149300  | 0.34590600  |
| C | -1.72034700 | 2.32030300  | 0.97838900  |
| N | -0.47613200 | 1.81617800  | 1.03564100  |
| C | 0.68337900  | 2.52046000  | 1.48075500  |
| C | 1.09847600  | 3.69897900  | 0.86033500  |
| C | 1.43435700  | 1.97149900  | 2.52079900  |
| C | 2.24075700  | 4.35302200  | 1.31675400  |
| C | 2.58490300  | 2.62893100  | 2.95861800  |
| H | 1.12116400  | 1.03704400  | 2.96974000  |
| C | 2.98868000  | 3.82650900  | 2.37097700  |
| H | 3.87994500  | 4.33353600  | 2.71947000  |
| C | 3.42179800  | 2.00734900  | 4.04640000  |
| C | 2.63653400  | 5.66642600  | 0.69923400  |
| F | 2.65645400  | 1.34751000  | 4.94923700  |
| F | 4.30690500  | 1.11623300  | 3.55588200  |
| F | 4.12993000  | 2.93839800  | 4.72533700  |
| F | 2.10427000  | 6.71637900  | 1.36611800  |
| F | 3.97925400  | 5.84656900  | 0.70292900  |
| F | 2.22110100  | 5.76902200  | -0.58511300 |
| S | -2.09689200 | 3.89652000  | 1.60976400  |
| H | 0.54127600  | 4.09768400  | 0.02311800  |
| H | -0.30248700 | 0.80249700  | 0.89077000  |
| H | -2.32723000 | 0.75867200  | -0.15902300 |
| C | -2.90909000 | 4.71728900  | -1.23052600 |
| H | -2.58940100 | 4.27658600  | -0.04724500 |
| C | -6.55694900 | 1.94146100  | 0.39368000  |
| H | -7.30941700 | 2.07387500  | -0.38885800 |
| H | -6.53017500 | 2.88613400  | 0.95347000  |
| C | -5.27689100 | 0.66277200  | -1.37849500 |
| C | -4.73009700 | -0.60777600 | -1.16150400 |
| C | -6.03148700 | 0.84664700  | -2.55315600 |
| C | -4.90562100 | -1.64318700 | -2.08424600 |
| H | -4.13744200 | -0.82103600 | -0.28103100 |
| C | -6.21243800 | -0.18122800 | -3.47516400 |
| H | -6.49647000 | 1.80650300  | -2.76279000 |



|   |             |             |             |
|---|-------------|-------------|-------------|
| C | -5.64595000 | -1.43669100 | -3.24496600 |
| H | -4.44349000 | -2.60499500 | -1.88657200 |
| H | -6.79603000 | 0.00090900  | -4.37386400 |
| H | -5.77427200 | -2.23850400 | -3.96676500 |
| C | -6.97758200 | 0.84418300  | 1.36098400  |
| C | -7.78869400 | -0.18231900 | 1.02406100  |
| C | -8.18956300 | -1.25626200 | 2.01298100  |
| H | -8.06370900 | -2.25015000 | 1.56259400  |
| H | -7.61752200 | -1.23945500 | 2.94229900  |
| H | -9.25529400 | -1.17068700 | 2.27117000  |
| C | -1.60602300 | 5.07663600  | -1.94205300 |
| H | -1.04132800 | 5.80419200  | -1.35047800 |
| H | -0.96183000 | 4.21117500  | -2.11654300 |
| H | -1.80938200 | 5.53766500  | -2.91766600 |
| C | -3.04203900 | 2.68409600  | -2.71896300 |
| H | -3.67009300 | 1.82351500  | -2.93487800 |
| H | -2.93895800 | 3.28839300  | -3.63270400 |
| H | -2.03711500 | 2.30298900  | -2.50604900 |
| C | -6.49192300 | 1.01506500  | 2.79801900  |
| H | -5.70422000 | 0.30176700  | 3.07544000  |
| H | -6.08098600 | 2.01607200  | 2.96087800  |
| H | -7.30589300 | 0.88646100  | 3.51926200  |
| C | -3.65837600 | 5.97506400  | -0.75491200 |
| H | -4.53577800 | 5.76900000  | -0.14056900 |
| H | -2.98028900 | 6.59786900  | -0.16334800 |
| H | -3.97899000 | 6.56036000  | -1.62526300 |
| C | -8.40933000 | -0.40083100 | -0.33537900 |
| H | -9.46638900 | -0.67720800 | -0.22175100 |
| H | -8.35751300 | 0.46811900  | -0.99225600 |
| H | -7.91954100 | -1.23107500 | -0.86105600 |

TS-EF-7SS-4

l imaginary frequency

H = -5472.488744

G = -5472.702262

E(M06-2X-DCM) = -5473.462508

|   |            |             |             |
|---|------------|-------------|-------------|
| O | 1.82991500 | -2.68180900 | 0.02983900  |
| O | 3.25132600 | -0.52464200 | 0.04279900  |
| P | 1.70567200 | -1.04257900 | -0.06585700 |
| O | 0.93418200 | -0.45464000 | 1.07080800  |
| C | 3.63375500 | -4.26992100 | 3.46248900  |
| C | 4.40035800 | -3.88690300 | 2.36710100  |
| C | 3.79146100 | -3.40867800 | 1.19707000  |
| C | 1.60407300 | -3.63506500 | 2.25317500  |

|   |              |              |              |
|---|--------------|--------------|--------------|
| C | 2. 24587100  | -4. 16131100 | 3. 38699800  |
| C | 4. 15959400  | -0. 85777500 | -0. 96340700 |
| C | 4. 74665600  | -2. 12162700 | -0. 97186500 |
| C | 5. 49367800  | -2. 52004300 | -2. 09135700 |
| C | 5. 76226800  | -1. 62282300 | -3. 11962000 |
| C | 5. 28873400  | -0. 31390600 | -3. 01741400 |
| C | 4. 47061400  | 0. 09629000  | -1. 95214100 |
| H | 1. 63258200  | -4. 46864700 | 4. 22922100  |
| H | 5. 53327000  | 0. 41157000  | -3. 78777600 |
| C | 4. 83754000  | -3. 19587000 | 0. 10855700  |
| C | 6. 11196800  | -2. 96796200 | 0. 99468100  |
| H | 6. 13465500  | -1. 91904000 | 1. 31194400  |
| H | 7. 03994900  | -3. 17194500 | 0. 45179900  |
| H | 6. 97225900  | -4. 07496800 | -1. 75428700 |
| H | 5. 70866200  | -4. 53950400 | -2. 88770100 |
| C | 2. 40766500  | -3. 24132400 | 1. 16606400  |
| H | 4. 10433800  | -4. 64472800 | 4. 36796900  |
| H | 6. 34666200  | -1. 92591900 | -3. 98488800 |
| C | 5. 90598400  | -3. 87499300 | 2. 22534500  |
| H | 6. 41116900  | -3. 49632700 | 3. 12119200  |
| H | 6. 29619000  | -4. 88713400 | 2. 04660100  |
| C | 5. 89886200  | -3. 97424100 | -1. 96798700 |
| C | 5. 03915200  | -4. 46621400 | -0. 78084700 |
| H | 4. 06057500  | -4. 80043300 | -1. 14405700 |
| H | 5. 49386000  | -5. 29558400 | -0. 22937200 |
| C | 4. 01579500  | 1. 51910900  | -1. 86711100 |
| C | 3. 15666300  | 2. 05926600  | -2. 85536900 |
| C | 4. 51797400  | 2. 34745400  | -0. 83061600 |
| C | 2. 59740200  | 1. 27297700  | -3. 91364100 |
| C | 2. 79907100  | 3. 45944300  | -2. 80135600 |
| C | 4. 13560700  | 3. 74014800  | -0. 78057400 |
| C | 1. 77971800  | 1. 83146300  | -4. 86017500 |
| H | 2. 79893000  | 0. 20925700  | -3. 93746700 |
| C | 1. 93957700  | 4. 00213100  | -3. 80756300 |
| C | 3. 29090500  | 4. 25805100  | -1. 76600900 |
| C | 1. 45069500  | 3. 21580600  | -4. 81538700 |
| H | 1. 35406700  | 1. 20512500  | -5. 63873500 |
| H | 1. 68314500  | 5. 05744700  | -3. 74762900 |
| H | 3. 00711800  | 5. 30672600  | -1. 72396400 |
| H | 0. 80034800  | 3. 63950400  | -5. 57661800 |
| C | 0. 11000900  | -3. 54473900 | 2. 25441600  |
| C | -0. 53800600 | -2. 63827200 | 3. 12745800  |
| C | -0. 65178900 | -4. 43892300 | 1. 46410700  |
| C | 0. 17773300  | -1. 67865000 | 3. 91500200  |

|   |             |             |             |
|---|-------------|-------------|-------------|
| C | -1.97911800 | -2.65335000 | 3.23491300  |
| C | -2.09337400 | -4.43426300 | 1.56877000  |
| C | -0.47332000 | -0.82114200 | 4.76355500  |
| H | 1.25431500  | -1.62211400 | 3.81230400  |
| C | -2.61900800 | -1.75295900 | 4.14526900  |
| C | -2.71637800 | -3.54991400 | 2.45541500  |
| C | -1.89213300 | -0.86431000 | 4.89069500  |
| H | 0.09608600  | -0.09228900 | 5.33426900  |
| H | -3.70223600 | -1.79626800 | 4.23463800  |
| H | -3.80072700 | -3.57289500 | 2.55267100  |
| H | -2.39142000 | -0.18563800 | 5.57725800  |
| C | 5.87826500  | 2.70146800  | 1.17210200  |
| H | 6.55731800  | 2.31191200  | 1.92581200  |
| C | 5.42031400  | 1.87743600  | 0.17783700  |
| H | 5.74889800  | 0.84519100  | 0.14714200  |
| C | 5.47717300  | 4.06594400  | 1.22928300  |
| H | 5.84844000  | 4.70383700  | 2.02702800  |
| C | 4.63578500  | 4.56804700  | 0.27380400  |
| H | 4.32410700  | 5.60884100  | 0.29791000  |
| C | -0.81557800 | -6.25151100 | -0.16737300 |
| H | -0.33402400 | -6.95805300 | -0.83789900 |
| C | -2.23580700 | -6.23904600 | -0.06451100 |
| H | -2.82497600 | -6.93732900 | -0.65323900 |
| C | -2.85245900 | -5.35572400 | 0.78097200  |
| H | -3.93609300 | -5.34092300 | 0.87254000  |
| C | -0.05352900 | -5.38614000 | 0.57273300  |
| H | 1.02660500  | -5.41398400 | 0.48860100  |
| N | 1.26124600  | -0.75918500 | -1.59804200 |
| S | -0.18676600 | -0.99227100 | -2.16114100 |
| O | -0.58622500 | 0.03779000  | -3.13249300 |
| O | -1.20367500 | -1.35403800 | -1.13033400 |
| C | -0.03147700 | -2.54792100 | -3.18417200 |
| F | 0.91603000  | -2.39166400 | -4.11622700 |
| F | -1.19699600 | -2.80332400 | -3.79679900 |
| F | 0.28446600  | -3.59128900 | -2.41176700 |
| C | -5.43013800 | -0.16389900 | -0.72119600 |
| C | -5.62903200 | 1.21223500  | -1.44602400 |
| H | -6.07685900 | 1.88302800  | -0.71565200 |
| H | -6.37982000 | 1.07723800  | -2.23807100 |
| C | -4.45505800 | 1.90251300  | -2.08590500 |
| C | -4.39153100 | 0.00254900  | 0.41930500  |
| H | -4.79816000 | 0.71885800  | 1.13262100  |
| H | -4.28042100 | -0.95251300 | 0.94340300  |
| N | -3.03710800 | 0.46228700  | 0.07288500  |

|   |             |             |             |
|---|-------------|-------------|-------------|
| C | -2.41273300 | 1.49540100  | 0.68571700  |
| N | -1.08015800 | 1.42426200  | 0.84177400  |
| C | -0.23851700 | 2.49245200  | 1.27738500  |
| C | -0.17455100 | 3.69704200  | 0.57705300  |
| C | 0.56997600  | 2.28506100  | 2.39552300  |
| C | 0.66564100  | 4.71270000  | 1.02860500  |
| C | 1.41890200  | 3.30460300  | 2.82788800  |
| H | 0.53674400  | 1.33218700  | 2.90898000  |
| C | 1.46413500  | 4.52611600  | 2.15791500  |
| H | 2.12169100  | 5.31480200  | 2.50221800  |
| C | 2.32908300  | 3.06020400  | 4.00333600  |
| C | 0.66502000  | 6.04038500  | 0.32130900  |
| F | 1.76012800  | 2.23114700  | 4.91131000  |
| F | 3.49506300  | 2.49462700  | 3.63060900  |
| F | 2.63373800  | 4.21095900  | 4.64581200  |
| F | -0.22390600 | 6.90076900  | 0.86961400  |
| F | 1.87475900  | 6.64757100  | 0.37638100  |
| F | 0.33503500  | 5.91912500  | -0.98563100 |
| S | -3.31314800 | 2.90312500  | 1.16711800  |
| H | -0.76733800 | 3.83796500  | -0.31698900 |
| H | -0.58211100 | 0.51555400  | 0.78432600  |
| H | -2.41014200 | -0.23543200 | -0.35746200 |
| C | -4.16737000 | 3.24347800  | -1.75190300 |
| H | -3.79757400 | 2.99481700  | -0.51449300 |
| C | -6.80002300 | -0.55547400 | -0.01120900 |
| H | -6.61684300 | -1.52303200 | 0.46528800  |
| H | -7.51667200 | -0.76185200 | -0.81382600 |
| C | -5.14742900 | -1.33147100 | -1.68728500 |
| C | -4.16265300 | -2.29639100 | -1.44424700 |
| C | -5.96440700 | -1.51344500 | -2.82008300 |
| C | -3.97493300 | -3.37757900 | -2.31078400 |
| H | -3.50193400 | -2.22445400 | -0.59014100 |
| C | -5.78683100 | -2.59249300 | -3.68238800 |
| H | -6.75791200 | -0.80421700 | -3.04232800 |
| C | -4.78353100 | -3.53146200 | -3.43294000 |
| H | -3.18314300 | -4.08806600 | -2.09735000 |
| H | -6.43288500 | -2.69756600 | -4.55016600 |
| H | -4.63470500 | -4.36895100 | -4.10886200 |
| C | -7.44918100 | 0.41387700  | 0.96647200  |
| C | -7.31251600 | 0.32855400  | 2.30839100  |
| C | -7.99755000 | 1.28607200  | 3.25885400  |
| H | -7.27777400 | 1.67739800  | 3.99003900  |
| H | -8.46382000 | 2.13965000  | 2.76420600  |
| H | -8.77456000 | 0.76676800  | 3.83843200  |

|   |             |             |             |
|---|-------------|-------------|-------------|
| C | -2.99277400 | 3.93092200  | -2.44372400 |
| H | -2.70260800 | 4.83048600  | -1.89126600 |
| H | -2.11346600 | 3.28679800  | -2.52748600 |
| H | -3.26762400 | 4.24770500  | -3.45864200 |
| C | -3.62636800 | 1.18532700  | -3.10480900 |
| H | -4.00363600 | 0.18812000  | -3.31997400 |
| H | -3.61740100 | 1.77313900  | -4.03376800 |
| H | -2.57314700 | 1.07593800  | -2.81809100 |
| C | -8.37824700 | 1.45510900  | 0.34682300  |
| H | -8.47812800 | 1.30541400  | -0.73211600 |
| H | -9.38829600 | 1.39654000  | 0.76926000  |
| H | -8.03247300 | 2.48593700  | 0.50060900  |
| C | -5.27980600 | 4.24385700  | -1.39221900 |
| H | -6.11153500 | 3.80796100  | -0.83737000 |
| H | -4.86203800 | 5.05385800  | -0.78591500 |
| H | -5.67877100 | 4.68589000  | -2.31340900 |
| C | -6.49784600 | -0.71506500 | 3.03829100  |
| H | -7.08502400 | -1.13850000 | 3.86411800  |
| H | -6.16800800 | -1.54371800 | 2.40872600  |
| H | -5.60310300 | -0.26669900 | 3.49237700  |

TS-EF-7SS-5

l imaginary frequency

H = -5472.489149

G = -5472.703157

E(M06-2X-DCM) = -5473.463843

|   |            |             |             |
|---|------------|-------------|-------------|
| O | 1.98612900 | -2.61320000 | 0.04165400  |
| O | 3.31951900 | -0.39918100 | 0.00242100  |
| P | 1.79442600 | -0.98047900 | -0.06667400 |
| O | 1.02867400 | -0.41439200 | 1.08498600  |
| C | 3.89601400 | -4.06170700 | 3.47952100  |
| C | 4.63306900 | -3.66231200 | 2.36986100  |
| C | 3.99108500 | -3.23420100 | 1.19799600  |
| C | 1.82704200 | -3.54848400 | 2.27926000  |
| C | 2.50377600 | -4.02319400 | 3.41534500  |
| C | 4.22283100 | -0.71252400 | -1.01397400 |
| C | 4.86491500 | -1.94913000 | -1.00624400 |
| C | 5.61437400 | -2.33697200 | -2.12760900 |
| C | 5.82789700 | -1.45015600 | -3.17767700 |
| C | 5.29617600 | -0.16230000 | -3.09564400 |
| C | 4.47541600 | 0.23341700  | -2.02680800 |
| H | 1.91375400 | -4.34721900 | 4.26791400  |
| H | 5.49656600 | 0.55680100  | -3.88450800 |
| C | 5.01598800 | -2.99520200 | 0.09456500  |

|   |             |             |             |
|---|-------------|-------------|-------------|
| C | 6.28691700  | -2.69131400 | 0.96225700  |
| H | 6.26413200  | -1.63632300 | 1.25866900  |
| H | 7.21793800  | -2.86323300 | 0.41346700  |
| H | 7.16733300  | -3.81424900 | -1.77727500 |
| H | 5.91342200  | -4.36119000 | -2.88439700 |
| C | 2.60057400  | -3.13199900 | 1.17854700  |
| H | 4.39243400  | -4.39695300 | 4.38671400  |
| H | 6.41410500  | -1.74437400 | -4.04478500 |
| C | 6.13513700  | -3.58218500 | 2.21253400  |
| H | 6.62990800  | -3.16216700 | 3.09567300  |
| H | 6.57117800  | -4.57820900 | 2.04992900  |
| C | 6.08794700  | -3.76794500 | -1.97931000 |
| C | 5.26619800  | -4.27345100 | -0.77115900 |
| H | 4.30002400  | -4.66020300 | -1.11491300 |
| H | 5.76532000  | -5.06907900 | -0.20849800 |
| C | 3.95623400  | 1.63519700  | -1.96428000 |
| C | 3.06066800  | 2.11435000  | -2.95161900 |
| C | 4.43165500  | 2.50710800  | -0.95124500 |
| C | 2.52802200  | 1.28189500  | -3.98808900 |
| C | 2.63665900  | 3.49654300  | -2.91942100 |
| C | 3.98232500  | 3.88027600  | -0.92171800 |
| C | 1.67536800  | 1.78256400  | -4.93604200 |
| H | 2.77922500  | 0.22851800  | -3.99356700 |
| C | 1.74285400  | 3.97826600  | -3.92673700 |
| C | 3.10010300  | 4.33732300  | -1.90444700 |
| C | 1.28204600  | 3.15054300  | -4.91428800 |
| H | 1.27222300  | 1.12194400  | -5.69816800 |
| H | 1.43774500  | 5.02147100  | -3.88467900 |
| H | 2.76419600  | 5.37118200  | -1.87668900 |
| H | 0.60478600  | 3.52815600  | -5.67625700 |
| C | 0.32991100  | -3.54173600 | 2.28970600  |
| C | -0.36608900 | -2.64988000 | 3.14043500  |
| C | -0.38178400 | -4.50233900 | 1.53107700  |
| C | 0.29728600  | -1.63609500 | 3.90544500  |
| C | -1.80484400 | -2.73870100 | 3.24866000  |
| C | -1.82050000 | -4.57958600 | 1.64492000  |
| C | -0.39988400 | -0.79022300 | 4.72863800  |
| H | 1.37030900  | -1.52959200 | 3.80554500  |
| C | -2.49405200 | -1.84224600 | 4.12651300  |
| C | -2.49140200 | -3.70125600 | 2.50218000  |
| C | -1.81608500 | -0.89678100 | 4.84781900  |
| H | 0.13034000  | -0.02179600 | 5.28524100  |
| H | -3.57503700 | -1.93440800 | 4.21149100  |
| H | -3.57269900 | -3.78155000 | 2.60276000  |

|   |             |             |             |
|---|-------------|-------------|-------------|
| H | -2.35246400 | -0.22231200 | 5.50998400  |
| C | 5.80195600  | 2.96601400  | 1.02317900  |
| H | 6.50994500  | 2.62476600  | 1.77366200  |
| C | 5.37010800  | 2.10128400  | 0.05211800  |
| H | 5.74810200  | 1.08575000  | 0.03601700  |
| C | 5.33579700  | 4.31033000  | 1.06043400  |
| H | 5.68737200  | 4.98118100  | 1.83986700  |
| C | 4.45691500  | 4.75203600  | 0.10888900  |
| H | 4.09519000  | 5.77669400  | 0.11818100  |
| C | -0.44534100 | -6.37419500 | -0.03949300 |
| H | 0.07406900  | -7.07214300 | -0.69049400 |
| C | -1.86290300 | -6.44487700 | 0.07524000  |
| H | -2.41212500 | -7.19696100 | -0.48511500 |
| C | -2.52694200 | -5.57194000 | 0.89520600  |
| H | -3.60897500 | -5.61857300 | 0.99406200  |
| C | 0.26731700  | -5.43989700 | 0.66525300  |
| H | 1.34661800  | -5.40503000 | 0.57316500  |
| N | 1.30317900  | -0.72686500 | -1.58920700 |
| S | -0.15455500 | -0.99995600 | -2.10929300 |
| O | -0.62106800 | 0.02429400  | -3.05609600 |
| O | -1.12410500 | -1.40654900 | -1.05010300 |
| C | 0.02339800  | -2.54047100 | -3.15053700 |
| F | 0.94242800  | -2.34834200 | -4.10427900 |
| F | -1.14840900 | -2.82697500 | -3.73666200 |
| F | 0.39008300  | -3.57950800 | -2.39447400 |
| C | -5.37669500 | -0.47584700 | -0.46745600 |
| C | -5.70128000 | 0.87360000  | -1.19554400 |
| H | -6.22605700 | 1.49359000  | -0.46990600 |
| H | -6.42556500 | 0.66341000  | -1.99512500 |
| C | -4.59533200 | 1.66167900  | -1.83822700 |
| C | -4.31282900 | -0.22376000 | 0.63361100  |
| H | -4.72435000 | 0.49378200  | 1.34025100  |
| H | -4.13383900 | -1.15667800 | 1.18010100  |
| N | -3.00212700 | 0.30530000  | 0.22861300  |
| C | -2.40647100 | 1.36731000  | 0.82405900  |
| N | -1.06581000 | 1.36773300  | 0.90891500  |
| C | -0.26436400 | 2.47986900  | 1.30846600  |
| C | -0.27982600 | 3.67666300  | 0.59244700  |
| C | 0.58774000  | 2.32551000  | 2.40229900  |
| C | 0.52746200  | 4.73570900  | 1.00311100  |
| C | 1.39959700  | 3.38949800  | 2.79635300  |
| H | 0.61510300  | 1.37879300  | 2.92695400  |
| C | 1.36779900  | 4.60201300  | 2.10927300  |
| H | 1.99830900  | 5.42497100  | 2.42258300  |

|   |               |              |              |
|---|---------------|--------------|--------------|
| C | 2. 35314800   | 3. 20532700  | 3. 94805900  |
| C | 0. 44755200   | 6. 05005600  | 0. 27560600  |
| F | 1. 85773000   | 2. 34979300  | 4. 87407900  |
| F | 3. 54045000   | 2. 70693900  | 3. 54716500  |
| F | 2. 60678600   | 4. 37588300  | 4. 57695000  |
| F | -0. 46988400  | 6. 87619000  | 0. 82990500  |
| F | 1. 62760500   | 6. 71479300  | 0. 29379700  |
| F | 0. 09579200   | 5. 89090800  | -1. 02127900 |
| S | -3. 35281700  | 2. 71698700  | 1. 37412300  |
| H | -0. 90774300  | 3. 77752900  | -0. 28320100 |
| H | -0. 52408300  | 0. 48555700  | 0. 83166700  |
| H | -2. 35793900  | -0. 35559800 | -0. 23353900 |
| C | -4. 40213100  | 3. 01873500  | -1. 49078800 |
| H | -3. 94891200  | 2. 78986200  | -0. 29826000 |
| C | -6. 70217800  | -0. 94551400 | 0. 27799800  |
| H | -6. 45527400  | -1. 90552000 | 0. 74905100  |
| H | -7. 42307200  | -1. 18779100 | -0. 50528200 |
| C | -5. 04391100  | -1. 62993700 | -1. 43397000 |
| C | -4. 00039800  | -2. 53404000 | -1. 20254400 |
| C | -5. 86786600  | -1. 86828400 | -2. 55130500 |
| C | -3. 76227200  | -3. 60672500 | -2. 06713200 |
| H | -3. 33274200  | -2. 41899900 | -0. 35866900 |
| C | -5. 64163600  | -2. 94100000 | -3. 41015200 |
| H | -6. 70626800  | -1. 21012600 | -2. 76539100 |
| C | -4. 57934000  | -3. 81602800 | -3. 17400800 |
| H | -2. 92515800  | -4. 26650300 | -1. 86465600 |
| H | -6. 29542300  | -3. 08998300 | -4. 26561800 |
| H | -4. 39134800  | -4. 64668400 | -3. 84857200 |
| C | -7. 33797900  | -0. 04000400 | 1. 32308600  |
| C | -8. 38606600  | 0. 77361200  | 1. 06147400  |
| C | -9. 02690400  | 1. 63930100  | 2. 12549600  |
| H | -10. 01357100 | 1. 24301100  | 2. 40720000  |
| H | -8. 43049700  | 1. 72873100  | 3. 03486200  |
| H | -9. 20206900  | 2. 65318200  | 1. 74184500  |
| C | -3. 32669100  | 3. 81327000  | -2. 22942000 |
| H | -3. 08210000  | 4. 72383200  | -1. 67346300 |
| H | -2. 40306200  | 3. 24661100  | -2. 37244200 |
| H | -3. 68185300  | 4. 12201300  | -3. 22150900 |
| C | -3. 73981500  | 1. 02001300  | -2. 88532700 |
| H | -4. 01165000  | -0. 01721200 | -3. 06836900 |
| H | -3. 84494500  | 1. 58709200  | -3. 82209100 |
| H | -2. 66903300  | 1. 03754700  | -2. 65062000 |
| C | -6. 78803900  | -0. 16485100 | 2. 74096900  |
| H | -6. 08528300  | -0. 99933200 | 2. 81907400  |



|   |              |             |             |
|---|--------------|-------------|-------------|
| H | -6.25519500  | 0.73541200  | 3.07381400  |
| H | -7.58607100  | -0.35163300 | 3.46822900  |
| C | -5.58031400  | 3.91315900  | -1.06425400 |
| H | -6.30086900  | 3.41800200  | -0.41203700 |
| H | -5.19434800  | 4.78530100  | -0.52756100 |
| H | -6.10985300  | 4.27350500  | -1.95457700 |
| C | -9.07698600  | 0.90979500  | -0.27733100 |
| H | -8.92729300  | 1.91456800  | -0.69794500 |
| H | -8.75118800  | 0.18625700  | -1.02674300 |
| H | -10.16203800 | 0.79134200  | -0.15281100 |

TS-EF-7SS-6

l imaginary frequency

H = -5472.478157

G = -5472.691745

E(M06-2X-DCM) = -5473.458901

|   |            |             |             |
|---|------------|-------------|-------------|
| O | 2.34576500 | -1.70029200 | -0.38889000 |
| O | 1.87275400 | 0.52427300  | -1.64756300 |
| P | 1.22234300 | -0.52850800 | -0.55790400 |
| O | 0.95618400 | 0.27421700  | 0.67904000  |
| C | 6.36459700 | -0.93226800 | 0.51047500  |
| C | 5.88445000 | -0.76714100 | -0.78370600 |
| C | 4.55542300 | -1.08685000 | -1.10500300 |
| C | 4.14670300 | -1.68056400 | 1.23074500  |
| C | 5.50388700 | -1.41840000 | 1.49147700  |
| C | 2.00854800 | 0.12096400  | -2.97677700 |
| C | 3.07196800 | -0.70060400 | -3.34166400 |
| C | 3.08671500 | -1.27353200 | -4.62370500 |
| C | 2.12966100 | -0.92193000 | -5.56835500 |
| C | 1.15814100 | 0.01980100  | -5.22791600 |
| C | 1.06583000 | 0.55065000  | -3.93157500 |
| H | 5.87585700 | -1.59267300 | 2.49644300  |
| H | 0.43367100 | 0.34268000  | -5.96983300 |
| C | 4.37210900 | -1.04004300 | -2.62074800 |
| C | 5.48177600 | 0.00098600  | -2.99891100 |
| H | 5.08339600 | 1.01050300  | -2.84202200 |
| H | 5.78691300 | -0.07624300 | -4.04670100 |
| H | 5.02832200 | -1.86851400 | -5.39515800 |
| H | 3.90687700 | -3.21009500 | -5.19185000 |
| C | 3.68171800 | -1.46443200 | -0.08323700 |
| H | 7.39903500 | -0.70304700 | 0.75430800  |
| H | 2.14049100 | -1.36051100 | -6.56293200 |
| C | 6.62685000 | -0.26696900 | -2.00246500 |
| H | 7.22644700 | 0.62655000  | -1.79282800 |

|   |              |              |              |
|---|--------------|--------------|--------------|
| H | 7. 32105900  | -1. 02823900 | -2. 38526900 |
| C | 4. 22837600  | -2. 25959600 | -4. 75097700 |
| C | 4. 70244000  | -2. 41678200 | -3. 28829100 |
| H | 4. 11235400  | -3. 19531500 | -2. 79442700 |
| H | 5. 76010700  | -2. 68382500 | -3. 19903900 |
| C | 0. 04268300  | 1. 60472300  | -3. 64669500 |
| C | -1. 34017100 | 1. 30271200  | -3. 69832600 |
| C | 0. 47189000  | 2. 94134500  | -3. 44254700 |
| C | -1. 83478700 | -0. 03040200 | -3. 87250100 |
| C | -2. 31016300 | 2. 36707500  | -3. 55544200 |
| C | -0. 50915800 | 3. 99067600  | -3. 28094000 |
| C | -3. 17942500 | -0. 28765600 | -3. 93217400 |
| H | -1. 12989300 | -0. 84989200 | -3. 91920400 |
| C | -3. 70433600 | 2. 05673100  | -3. 63728700 |
| C | -1. 86989600 | 3. 67616000  | -3. 34441400 |
| C | -4. 12977800 | 0. 76931500  | -3. 83014600 |
| H | -3. 52697300 | -1. 31156700 | -4. 02321900 |
| H | -4. 41942400 | 2. 87103800  | -3. 54341700 |
| H | -2. 60423900 | 4. 47311900  | -3. 24177900 |
| H | -5. 19052700 | 0. 54132300  | -3. 88110300 |
| C | 3. 30186800  | -2. 21848800 | 2. 34192700  |
| C | 3. 16729800  | -1. 47155500 | 3. 54086400  |
| C | 2. 75052800  | -3. 52270000 | 2. 25353600  |
| C | 3. 67715200  | -0. 14011300 | 3. 69454900  |
| C | 2. 49396100  | -2. 05831400 | 4. 67826400  |
| C | 2. 03049000  | -4. 07134700 | 3. 38109800  |
| C | 3. 59902100  | 0. 52541100  | 4. 89097100  |
| H | 4. 12321700  | 0. 35218000  | 2. 83854500  |
| C | 2. 43169800  | -1. 32995700 | 5. 90848700  |
| C | 1. 93060400  | -3. 33122500 | 4. 56171700  |
| C | 2. 98307900  | -0. 08105900 | 6. 02306200  |
| H | 3. 99634400  | 1. 53359900  | 4. 97073600  |
| H | 1. 94398800  | -1. 80179300 | 6. 75888700  |
| H | 1. 41629000  | -3. 76522800 | 5. 41718400  |
| H | 2. 94453500  | 0. 45295100  | 6. 96930800  |
| C | 2. 23658500  | 4. 62638800  | -3. 24185900 |
| H | 3. 29239400  | 4. 88405600  | -3. 24081900 |
| C | 1. 85325000  | 3. 32316300  | -3. 42612900 |
| H | 2. 60773900  | 2. 56040600  | -3. 57944700 |
| C | 1. 26473300  | 5. 65256100  | -3. 06857100 |
| H | 1. 58538200  | 6. 68256200  | -2. 93625000 |
| C | -0. 06767400 | 5. 33809700  | -3. 09184100 |
| H | -0. 82136900 | 6. 11347000  | -2. 98111500 |
| C | 2. 34746500  | -5. 60929800 | 1. 04793100  |

|   |             |             |             |
|---|-------------|-------------|-------------|
| H | 2.46544900  | -6.21096400 | 0.15116400  |
| C | 1.60909000  | -6.12843400 | 2.14766600  |
| H | 1.16827000  | -7.11919800 | 2.08129800  |
| C | 1.46287700  | -5.37997500 | 3.28279700  |
| H | 0.91306000  | -5.76703900 | 4.13746300  |
| C | 2.90118000  | -4.35815600 | 1.10147900  |
| H | 3.46076800  | -3.98893100 | 0.25169000  |
| N | -0.04955400 | -1.22180100 | -1.27285200 |
| S | -0.56727300 | -2.73754900 | -1.22515100 |
| O | -1.91415500 | -2.78039900 | -1.80874700 |
| O | -0.32445100 | -3.42741800 | 0.04966900  |
| C | 0.45524500  | -3.67642700 | -2.48908900 |
| F | 0.48083800  | -3.01783300 | -3.65747900 |
| F | -0.10092000 | -4.87628900 | -2.68724500 |
| F | 1.72049800  | -3.86197100 | -2.08043500 |
| C | -0.33952100 | 3.94238600  | 2.48401100  |
| C | -0.75456200 | 3.35148300  | 3.88788200  |
| H | -1.64598000 | 3.88920800  | 4.20797500  |
| H | 0.02872800  | 3.61664100  | 4.61086800  |
| C | -0.97997900 | 1.87489700  | 4.04266800  |
| C | -1.27677500 | 3.38060700  | 1.38627900  |
| H | -2.29883900 | 3.68420900  | 1.61269700  |
| H | -1.01475500 | 3.83390600  | 0.42494300  |
| N | -1.29662700 | 1.92040600  | 1.21939300  |
| C | -2.41970000 | 1.17862600  | 1.10981700  |
| N | -2.34857800 | 0.01954600  | 0.43612300  |
| C | -3.40853600 | -0.94765400 | 0.36651300  |
| C | -3.33784300 | -2.10558600 | 1.13824700  |
| C | -4.45401500 | -0.75438000 | -0.53156800 |
| C | -4.33907200 | -3.06928000 | 1.01746800  |
| C | -5.44134300 | -1.73176800 | -0.65486600 |
| H | -4.48114600 | 0.14089500  | -1.14133200 |
| C | -5.39155100 | -2.88930800 | 0.12033400  |
| H | -6.15849800 | -3.64798700 | 0.01979100  |
| C | -6.52080500 | -1.55295100 | -1.68852800 |
| C | -4.31845700 | -4.28723200 | 1.90351700  |
| F | -6.08579500 | -1.88415400 | -2.92936800 |
| F | -7.60286100 | -2.31742300 | -1.43280100 |
| F | -6.93664900 | -0.26699400 | -1.75920600 |
| F | -5.03371000 | -4.07578500 | 3.03820200  |
| F | -4.86668000 | -5.36003700 | 1.29403800  |
| F | -3.07053600 | -4.61818000 | 2.28316100  |
| S | -3.87997400 | 1.63302100  | 1.93911400  |
| H | -2.49356100 | -2.27095600 | 1.79728900  |

|   |             |             |             |
|---|-------------|-------------|-------------|
| H | -1.50784200 | -0.20955500 | -0.11312800 |
| H | -0.42461000 | 1.45654600  | 0.90702200  |
| C | -2.22240400 | 1.38662000  | 4.50481200  |
| H | -2.86252500 | 1.54152300  | 3.37109900  |
| C | -0.66239000 | 5.48998900  | 2.60854300  |
| H | 0.00486500  | 5.88680800  | 3.38497500  |
| H | -1.67460800 | 5.56924100  | 3.01273000  |
| C | 1.16088600  | 3.76280400  | 2.18161000  |
| C | 2.12045800  | 4.11305700  | 3.15072200  |
| C | 1.63634600  | 3.33791200  | 0.93471600  |
| C | 3.48632600  | 4.03458500  | 2.88828100  |
| H | 1.80704000  | 4.47119000  | 4.12817600  |
| C | 3.00507200  | 3.24792300  | 0.66798700  |
| H | 0.95720500  | 3.06065200  | 0.13840100  |
| C | 3.93773800  | 3.59608900  | 1.64069200  |
| H | 4.19774100  | 4.32089200  | 3.65885500  |
| H | 3.32352500  | 2.89391700  | -0.30732400 |
| H | 5.00234400  | 3.52791600  | 1.43439500  |
| C | -0.53917400 | 6.37070300  | 1.37612700  |
| C | -1.61452400 | 6.83476900  | 0.70062300  |
| C | -1.48182100 | 7.77277900  | -0.48091100 |
| H | -0.47745100 | 7.79986800  | -0.90575800 |
| H | -2.17545800 | 7.48274800  | -1.28084400 |
| H | -1.75619800 | 8.79910900  | -0.19447800 |
| C | -2.35192600 | -0.09954000 | 4.83869900  |
| H | -3.40769000 | -0.37906200 | 4.90016000  |
| H | -1.88039500 | -0.74633100 | 4.09592900  |
| H | -1.89145600 | -0.31937900 | 5.81051100  |
| C | 0.87344500  | 6.79034000  | 0.99089800  |
| H | 1.22146600  | 6.28709000  | 0.08043000  |
| H | 0.94098500  | 7.86965100  | 0.81512200  |
| H | 1.58760100  | 6.54291500  | 1.77961900  |
| C | 0.16060200  | 0.94845300  | 3.76900000  |
| H | 0.55719900  | 0.59538100  | 4.73382000  |
| H | -0.13347100 | 0.05439800  | 3.21495600  |
| H | 0.97326800  | 1.42151600  | 3.22311900  |
| C | -3.15787300 | 2.24493800  | 5.37378400  |
| H | -3.26800900 | 3.27442400  | 5.02937400  |
| H | -4.15576500 | 1.79612400  | 5.37580500  |
| H | -2.79805000 | 2.26427200  | 6.40967600  |
| C | -3.06241800 | 6.52906300  | 1.01564500  |
| H | -3.51071000 | 5.91591300  | 0.22111900  |
| H | -3.22559300 | 6.00599500  | 1.95975800  |
| H | -3.64533600 | 7.45973900  | 1.04973200  |

TS-EF-7SR

l imaginary frequency

H = -5472.477823

G = -5472.690900

E(M06-2X-DCM) = -5473.457032

|   |             |             |             |
|---|-------------|-------------|-------------|
| O | -0.44625000 | 2.94423600  | -0.04446000 |
| O | -1.46006300 | 1.14280500  | -1.63210500 |
| P | -0.40845000 | 1.35339800  | -0.38753400 |
| O | -0.92807100 | 0.45596700  | 0.69998200  |
| C | -4.01822100 | 4.87383900  | 0.95453100  |
| C | -3.70910700 | 4.60142600  | -0.37416100 |
| C | -2.47756800 | 4.02314300  | -0.71939200 |
| C | -1.87234400 | 3.92225400  | 1.64886300  |
| C | -3.08501200 | 4.56812400  | 1.94521600  |
| C | -1.19681300 | 1.72659900  | -2.87014600 |
| C | -1.46868700 | 3.08017600  | -3.05883500 |
| C | -1.02698400 | 3.70608500  | -4.23586300 |
| C | -0.44312800 | 2.96590200  | -5.25765000 |
| C | -0.30959300 | 1.58576400  | -5.10351500 |
| C | -0.66761400 | 0.93696400  | -3.91098500 |
| H | -3.29421200 | 4.82145300  | 2.98036600  |
| H | 0.10245500  | 0.98844000  | -5.91159200 |
| C | -2.29214100 | 4.06880200  | -2.23483300 |
| C | -3.79130300 | 4.05041900  | -2.69170300 |
| H | -4.14411500 | 3.01245600  | -2.69212900 |
| H | -3.92502400 | 4.44809500  | -3.70222800 |
| H | -2.10777300 | 5.49476400  | -4.82442300 |
| H | -0.40337200 | 5.77954100  | -4.48750900 |
| C | -1.61542300 | 3.61588200  | 0.29688600  |
| H | -4.96502300 | 5.33698000  | 1.22114900  |
| H | -0.10508300 | 3.44836000  | -6.17122300 |
| C | -4.54327900 | 4.85533000  | -1.61056400 |
| H | -5.58370600 | 4.53221000  | -1.48931100 |
| H | -4.57335300 | 5.92612000  | -1.85637700 |
| C | -1.27610200 | 5.19748800  | -4.17028300 |
| C | -1.62238400 | 5.41230400  | -2.68060000 |
| H | -0.69884100 | 5.54652300  | -2.10698900 |
| H | -2.26335700 | 6.28114800  | -2.50135500 |
| C | -0.54596600 | -0.55424300 | -3.82750800 |
| C | 0.72641900  | -1.17684100 | -3.86022900 |
| C | -1.72310300 | -1.34584000 | -3.83456100 |
| C | 1.95127700  | -0.43568500 | -3.84068900 |
| C | 0.81746400  | -2.62055300 | -3.90203500 |

|   |             |             |             |
|---|-------------|-------------|-------------|
| C | -1.61606600 | -2.78818800 | -3.85852300 |
| C | 3.16670400  | -1.06664200 | -3.88086400 |
| H | 1.91023500  | 0.64169700  | -3.75703200 |
| C | 2.10651400  | -3.23921500 | -3.95613500 |
| C | -0.35199500 | -3.38451900 | -3.89151700 |
| C | 3.25085800  | -2.48660100 | -3.95219500 |
| H | 4.07639700  | -0.47690500 | -3.82928500 |
| H | 2.15446100  | -4.32504300 | -4.00125700 |
| H | -0.27744200 | -4.46989500 | -3.92707100 |
| H | 4.22569300  | -2.96488800 | -3.97634300 |
| C | -0.88979900 | 3.64131500  | 2.74217400  |
| C | -1.23900900 | 2.78044800  | 3.81315100  |
| C | 0.36512900  | 4.30252900  | 2.74511600  |
| C | -2.49665400 | 2.09823900  | 3.89032700  |
| C | -0.30241300 | 2.56680700  | 4.89438000  |
| C | 1.30203300  | 4.05380300  | 3.81697900  |
| C | -2.82157300 | 1.30615900  | 4.96213000  |
| H | -3.20723500 | 2.22342000  | 3.08253200  |
| C | -0.67535600 | 1.72512000  | 5.98955000  |
| C | 0.94485000  | 3.19435800  | 4.85833600  |
| C | -1.90253300 | 1.11795400  | 6.03402600  |
| H | -3.79198700 | 0.81753600  | 4.99598900  |
| H | 0.03980300  | 1.59017300  | 6.79803400  |
| H | 1.65034900  | 3.02146600  | 5.66868900  |
| H | -2.17981500 | 0.49731000  | 6.88238500  |
| C | -4.15902900 | -1.57448700 | -3.89127800 |
| H | -5.14393200 | -1.11619400 | -3.91617800 |
| C | -3.04027500 | -0.78306800 | -3.86012200 |
| H | -3.14768000 | 0.29536800  | -3.86760400 |
| C | -4.04671300 | -2.99430000 | -3.89818000 |
| H | -4.94393200 | -3.60641000 | -3.92939400 |
| C | -2.80860400 | -3.57897900 | -3.88077900 |
| H | -2.70612600 | -4.66178200 | -3.90461100 |
| C | 1.97080000  | 5.86743500  | 1.77457500  |
| H | 2.23585400  | 6.57523000  | 0.99399000  |
| C | 2.90196100  | 5.59135600  | 2.81437900  |
| H | 3.87047300  | 6.08361500  | 2.81543400  |
| C | 2.57082000  | 4.71235400  | 3.80812700  |
| H | 3.26660600  | 4.49782100  | 4.61566900  |
| C | 0.74959300  | 5.24868900  | 1.74275800  |
| H | 0.05505400  | 5.48111900  | 0.94468300  |
| N | 1.07913500  | 1.06060500  | -0.94709900 |
| S | 2.44730600  | 1.84845800  | -0.64512000 |
| O | 3.55327400  | 1.04397300  | -1.17970500 |

|   |              |              |              |
|---|--------------|--------------|--------------|
| O | 2. 55598200  | 2. 38515600  | 0. 71768400  |
| C | 2. 44486000  | 3. 35769400  | -1. 76891900 |
| F | 2. 08933500  | 3. 01853600  | -3. 01841900 |
| F | 3. 68105700  | 3. 86524300  | -1. 80010500 |
| F | 1. 60662800  | 4. 31050500  | -1. 33896500 |
| C | -2. 72455000 | -2. 93136000 | 1. 13857600  |
| C | -2. 35137800 | -2. 39412600 | 2. 59061800  |
| H | -3. 02909800 | -2. 86183400 | 3. 31234100  |
| H | -2. 56306600 | -1. 32634800 | 2. 60755000  |
| C | -0. 95720600 | -2. 54690600 | 3. 16591100  |
| C | -1. 43550400 | -3. 26143500 | 0. 33263800  |
| H | -1. 05275900 | -4. 24318900 | 0. 60540600  |
| H | -1. 68239600 | -3. 28948400 | -0. 73549700 |
| N | -0. 33796600 | -2. 30946000 | 0. 51358800  |
| C | 0. 96822500  | -2. 65298600 | 0. 53729400  |
| N | 1. 86503100  | -1. 70945400 | 0. 19822800  |
| C | 3. 28550700  | -1. 83830700 | 0. 33765400  |
| C | 3. 96142700  | -0. 99609600 | 1. 21995300  |
| C | 3. 98742100  | -2. 75283700 | -0. 44499500 |
| C | 5. 34903200  | -1. 09072400 | 1. 33061900  |
| C | 5. 37469100  | -2. 83728300 | -0. 32643900 |
| H | 3. 45612000  | -3. 37676400 | -1. 15300800 |
| C | 6. 06130000  | -2. 01140100 | 0. 56278300  |
| H | 7. 13924800  | -2. 07722300 | 0. 64959700  |
| C | 6. 12980200  | -3. 78089100 | -1. 22390400 |
| C | 6. 07848000  | -0. 23717700 | 2. 33547500  |
| F | 6. 34137400  | -3. 24199000 | -2. 45145600 |
| F | 7. 34156300  | -4. 09799500 | -0. 72171100 |
| F | 5. 45279200  | -4. 93343800 | -1. 42042200 |
| F | 6. 17601200  | -0. 86948500 | 3. 53257000  |
| F | 7. 33994900  | 0. 03630700  | 1. 93694000  |
| F | 5. 45101200  | 0. 93131900  | 2. 55786700  |
| S | 1. 46321300  | -4. 21523900 | 1. 10773600  |
| H | 3. 41544800  | -0. 25277600 | 1. 79052200  |
| H | 1. 53355300  | -0. 82608700 | -0. 22194600 |
| H | -0. 55823900 | -1. 30529900 | 0. 39619900  |
| C | -0. 38411400 | -3. 78427100 | 3. 52571200  |
| H | 0. 31871100  | -3. 95021300 | 2. 43447200  |
| C | -0. 24215200 | -1. 26421100 | 3. 46222800  |
| H | 0. 84439000  | -1. 37814300 | 3. 48044200  |
| H | -0. 51193000 | -0. 47122100 | 2. 76181900  |
| H | -0. 53909200 | -0. 92387400 | 4. 46778800  |
| C | -3. 62476400 | -4. 18421500 | 1. 19254600  |
| C | -4. 68355900 | -4. 27555600 | 2. 11370000  |

|   |             |             |             |
|---|-------------|-------------|-------------|
| C | -3.48307800 | -5.24211700 | 0.27786900  |
| C | -5.53663000 | -5.37831500 | 2.14157000  |
| H | -4.86360300 | -3.47077100 | 2.81837900  |
| C | -4.33567000 | -6.34827200 | 0.30133100  |
| H | -2.70454700 | -5.22088700 | -0.47630800 |
| C | -5.36564200 | -6.42629900 | 1.23618300  |
| H | -6.33903900 | -5.41406200 | 2.87389100  |
| H | -4.18730700 | -7.14974400 | -0.41749800 |
| H | -6.02683900 | -7.28813100 | 1.25865800  |
| C | -3.49740400 | -1.80606400 | 0.32684700  |
| H | -3.61927000 | -2.20543100 | -0.68295700 |
| H | -2.81912800 | -0.94995900 | 0.23848100  |
| C | -4.83394400 | -1.29722900 | 0.84627100  |
| C | -6.02599500 | -1.74172400 | 0.38815600  |
| C | -4.74345100 | -0.17783300 | 1.87357800  |
| H | -4.79767200 | -0.54360600 | 2.90976300  |
| H | -3.79415300 | 0.35626900  | 1.77228600  |
| H | -5.53992200 | 0.56227800  | 1.75656600  |
| C | -7.35398400 | -1.22663200 | 0.90236000  |
| H | -7.89866400 | -0.69173100 | 0.11070000  |
| H | -7.99478100 | -2.06927000 | 1.19691500  |
| H | -7.27268000 | -0.56159400 | 1.76333400  |
| C | 0.74922300  | -3.81919400 | 4.56229600  |
| H | 0.34673900  | -3.65382000 | 5.56944500  |
| H | 1.22420400  | -4.80487100 | 4.54984000  |
| H | 1.52962900  | -3.07839300 | 4.38132400  |
| C | -6.21425900 | -2.79681900 | -0.67745600 |
| H | -6.91137200 | -2.43218600 | -1.44535300 |
| H | -5.29492200 | -3.09982700 | -1.17797300 |
| H | -6.66770800 | -3.70046500 | -0.24793600 |
| C | -1.23962000 | -5.04937200 | 3.58385000  |
| H | -1.71121900 | -5.13573500 | 4.57174500  |
| H | -2.02699900 | -5.07944400 | 2.83162500  |
| H | -0.60856900 | -5.93401300 | 3.44664000  |

TS-EF-7SR-1

l imaginary frequency

H = -5472.476124

G = -5472.690863

E(M06-2X-DCM) = -5473.455592

|   |            |             |             |
|---|------------|-------------|-------------|
| O | 1.25125600 | -2.53512400 | 0.86639200  |
| O | 1.49590200 | -1.57073600 | -1.54493600 |
| P | 0.74501400 | -1.32410000 | -0.10380700 |
| O | 1.17533000 | 0.04071300  | 0.35486700  |



|   |              |              |              |
|---|--------------|--------------|--------------|
| C | 5. 31409700  | -3. 30348100 | 1. 53380900  |
| C | 4. 69216400  | -3. 73557500 | 0. 36775800  |
| C | 3. 31551100  | -3. 54177200 | 0. 17508300  |
| C | 3. 18099000  | -2. 39953200 | 2. 32987600  |
| C | 4. 54808100  | -2. 67617200 | 2. 51383800  |
| C | 1. 16766700  | -2. 69441700 | -2. 30851500 |
| C | 1. 68602300  | -3. 93953400 | -1. 95544300 |
| C | 1. 18993500  | -5. 09292700 | -2. 58465300 |
| C | 0. 28985900  | -4. 99490100 | -3. 63893600 |
| C | -0. 09339800 | -3. 72908900 | -4. 08124500 |
| C | 0. 32651300  | -2. 55743500 | -3. 43112300 |
| H | 5. 01068000  | -2. 37725300 | 3. 44956400  |
| H | -0. 74840500 | -3. 63140500 | -4. 94207100 |
| C | 2. 85365600  | -4. 32258100 | -1. 05117300 |
| C | 4. 18660100  | -4. 35044600 | -1. 87612200 |
| H | 4. 27885700  | -3. 40482800 | -2. 42299400 |
| H | 4. 20691100  | -5. 16254000 | -2. 60899400 |
| H | 2. 50122800  | -6. 82293100 | -2. 61107400 |
| H | 1. 00136200  | -7. 08802600 | -1. 72856900 |
| C | 2. 59332100  | -2. 80666600 | 1. 11470400  |
| H | 6. 37707900  | -3. 46732200 | 1. 69211200  |
| H | -0. 09578200 | -5. 88569600 | -4. 12821600 |
| C | 5. 30339900  | -4. 44950400 | -0. 81704000 |
| H | 6. 24242400  | -3. 98956600 | -1. 14603700 |
| H | 5. 53409900  | -5. 49614700 | -0. 57349900 |
| C | 1. 76981000  | -6. 33833900 | -1. 94926600 |
| C | 2. 43954400  | -5. 78392100 | -0. 67273000 |
| H | 1. 70303900  | -5. 73919900 | 0. 13644800  |
| H | 3. 28707500  | -6. 38452500 | -0. 32788800 |
| C | -0. 04729300 | -1. 23690800 | -4. 03246800 |
| C | -1. 38746200 | -0. 78346100 | -4. 00881600 |
| C | 0. 93407000  | -0. 51950200 | -4. 76343200 |
| C | -2. 42359200 | -1. 47394600 | -3. 30090400 |
| C | -1. 74763500 | 0. 42038800  | -4. 72627800 |
| C | 0. 56425200  | 0. 69459500  | -5. 45610200 |
| C | -3. 71883900 | -1. 02762900 | -3. 32518100 |
| H | -2. 16798600 | -2. 34928900 | -2. 71856900 |
| C | -3. 11275100 | 0. 84784900  | -4. 72973000 |
| C | -0. 76278100 | 1. 13175800  | -5. 41586700 |
| C | -4. 07509800 | 0. 14025400  | -4. 06010500 |
| H | -4. 47766300 | -1. 55755700 | -2. 75799900 |
| H | -3. 36951100 | 1. 74600500  | -5. 28713300 |
| H | -1. 04020700 | 2. 03602200  | -5. 95451900 |
| H | -5. 10912100 | 0. 47087300  | -4. 07026900 |

|   |              |              |              |
|---|--------------|--------------|--------------|
| C | 2. 42893200  | -1. 75609700 | 3. 45160400  |
| C | 2. 84223700  | -0. 48863300 | 3. 93650200  |
| C | 1. 39552900  | -2. 46590200 | 4. 11618600  |
| C | 3. 85690500  | 0. 29786200  | 3. 29815000  |
| C | 2. 23191100  | 0. 05716900  | 5. 12867300  |
| C | 0. 75886500  | -1. 88156400 | 5. 27550800  |
| C | 4. 27799500  | 1. 49260100  | 3. 82575800  |
| H | 4. 29516100  | -0. 06531500 | 2. 37602400  |
| C | 2. 70057100  | 1. 30653700  | 5. 64696500  |
| C | 1. 20079500  | -0. 64629100 | 5. 75606800  |
| C | 3. 70225400  | 2. 00288000  | 5. 02500500  |
| H | 5. 06064800  | 2. 05653900  | 3. 32439600  |
| H | 2. 24544700  | 1. 68587900  | 6. 55951200  |
| H | 0. 73916600  | -0. 22930600 | 6. 64924300  |
| H | 4. 05827500  | 2. 94292100  | 5. 43863200  |
| C | 3. 20792000  | -0. 26503700 | -5. 63222200 |
| H | 4. 22579100  | -0. 63576100 | -5. 72057800 |
| C | 2. 28901300  | -0. 96670600 | -4. 89502700 |
| H | 2. 58421700  | -1. 88941300 | -4. 40866700 |
| C | 2. 84272100  | 0. 94342900  | -6. 29139700 |
| H | 3. 58330000  | 1. 48622800  | -6. 87277900 |
| C | 1. 55696100  | 1. 40541800  | -6. 20157400 |
| H | 1. 25895000  | 2. 31842600  | -6. 71228600 |
| C | -0. 04430000 | -4. 42250600 | 4. 37658600  |
| H | -0. 36015000 | -5. 40513300 | 4. 03784100  |
| C | -0. 68998800 | -3. 82633200 | 5. 49541100  |
| H | -1. 49367800 | -4. 35606800 | 5. 99914700  |
| C | -0. 29166500 | -2. 59367000 | 5. 93374700  |
| H | -0. 76540100 | -2. 12993700 | 6. 79573300  |
| C | 0. 96336800  | -3. 77044300 | 3. 71742000  |
| H | 1. 44218200  | -4. 24909300 | 2. 87292800  |
| N | -0. 83424800 | -1. 56408400 | -0. 33636700 |
| S | -1. 91292200 | -2. 30350900 | 0. 58942500  |
| O | -3. 24530500 | -2. 03593300 | 0. 03184100  |
| O | -1. 70342500 | -2. 12667300 | 2. 03394600  |
| C | -1. 70621500 | -4. 14507100 | 0. 27997300  |
| F | -1. 66533200 | -4. 39509500 | -1. 03668100 |
| F | -2. 75471100 | -4. 78615100 | 0. 80602900  |
| F | -0. 58935100 | -4. 63460000 | 0. 83899400  |
| C | 1. 98507500  | 3. 83648500  | 0. 35938200  |
| C | 1. 70481100  | 3. 65771800  | 1. 92543600  |
| H | 2. 11318900  | 4. 53088200  | 2. 44039000  |
| H | 2. 28401700  | 2. 79377900  | 2. 25909500  |
| C | 0. 30773900  | 3. 46741300  | 2. 45930200  |

|   |             |             |             |
|---|-------------|-------------|-------------|
| C | 0.68907900  | 3.63894200  | -0.47121400 |
| H | 0.06059800  | 4.52469200  | -0.40028000 |
| H | 0.95792200  | 3.51669900  | -1.52348100 |
| N | -0.14179300 | 2.49622700  | -0.08118300 |
| C | -1.49085900 | 2.51007500  | -0.06048200 |
| N | -2.13667700 | 1.32760800  | -0.08647100 |
| C | -3.54406900 | 1.18056400  | 0.16057500  |
| C | -3.96998900 | 0.62943600  | 1.36749200  |
| C | -4.46747800 | 1.54831900  | -0.81587200 |
| C | -5.33571400 | 0.46839000  | 1.60467000  |
| C | -5.82985600 | 1.37900300  | -0.56927400 |
| H | -4.12259700 | 1.94989500  | -1.76071100 |
| C | -6.27018600 | 0.84451000  | 0.64193200  |
| H | -7.32953400 | 0.71434000  | 0.82918000  |
| C | -6.82811000 | 1.70608100  | -1.64701300 |
| C | -5.80249200 | -0.05706500 | 2.93726800  |
| F | -7.05861000 | 0.63820600  | -2.45336800 |
| F | -8.02269500 | 2.07095200  | -1.13501400 |
| F | -6.40008800 | 2.70824700  | -2.44483500 |
| F | -5.95548700 | 0.95205400  | 3.83243900  |
| F | -6.99878700 | -0.67653400 | 2.84087600  |
| F | -4.92670200 | -0.92631300 | 3.47244900  |
| S | -2.37163700 | 3.99574200  | 0.11666200  |
| H | -3.24398600 | 0.29491800  | 2.10041500  |
| H | -1.61319400 | 0.45637600  | -0.25220900 |
| H | 0.32171100  | 1.56962100  | -0.03627300 |
| C | -0.61263300 | 4.53228700  | 2.57171000  |
| H | -1.26934600 | 4.29809200  | 1.48112700  |
| C | -0.01336800 | 2.10631500  | 2.99392200  |
| H | -1.08290500 | 1.88444300  | 2.99254700  |
| H | 0.52097200  | 1.31763000  | 2.45961700  |
| H | 0.31882300  | 2.06492100  | 4.04316800  |
| C | 2.55780600  | 5.24281500  | 0.06586800  |
| C | 3.54086300  | 5.79859500  | 0.90415300  |
| C | 2.18214100  | 5.99515700  | -1.05868700 |
| C | 4.09785100  | 7.05128700  | 0.65366600  |
| H | 3.89616300  | 5.24334700  | 1.76791600  |
| C | 2.73987000  | 7.25007300  | -1.31714600 |
| H | 1.44691400  | 5.61620200  | -1.75889900 |
| C | 3.69657500  | 7.78945900  | -0.46055400 |
| H | 4.85096500  | 7.44692300  | 1.33010500  |
| H | 2.41832300  | 7.80321600  | -2.19556800 |
| H | 4.12645100  | 8.76738900  | -0.65846300 |
| C | 3.09246900  | 2.76326600  | -0.00298500 |

|   |             |            |             |
|---|-------------|------------|-------------|
| H | 2.69436800  | 1.77904800 | 0.26889100  |
| H | 3.92667000  | 2.95246400 | 0.67850700  |
| C | 3.57900900  | 2.70610200 | -1.44234100 |
| C | 4.74451500  | 3.24491800 | -1.86328200 |
| C | 2.70162200  | 1.90294700 | -2.39460200 |
| H | 3.28496000  | 1.19117300 | -2.98530300 |
| H | 1.96739100  | 1.30739100 | -1.84835700 |
| H | 2.15815500  | 2.52877400 | -3.11580100 |
| C | 5.20211400  | 3.15934800 | -3.30405300 |
| H | 5.48962200  | 4.15528000 | -3.66913000 |
| H | 6.10063700  | 2.53052300 | -3.39114700 |
| H | 4.44716200  | 2.76160800 | -3.98380100 |
| C | -1.75445000 | 4.43936500 | 3.59416500  |
| H | -1.37156000 | 4.62258900 | 4.60585800  |
| H | -2.50524900 | 5.20467600 | 3.37615900  |
| H | -2.26234300 | 3.47349000 | 3.59208300  |
| C | 5.74776000  | 3.97145300 | -0.99742200 |
| H | 5.78697200  | 5.03879000 | -1.25341300 |
| H | 5.54889700  | 3.90202500 | 0.07283300  |
| H | 6.75491100  | 3.56955700 | -1.17731800 |
| C | -0.13903400 | 5.97274500 | 2.36530100  |
| H | 0.31405200  | 6.35848900 | 3.28807900  |
| H | 0.59010200  | 6.07790000 | 1.56066900  |
| H | -0.99377800 | 6.61438200 | 2.12793100  |

TS-EF-7SR-2

l imaginary frequency

H = -5472.483368

G = -5472.694891

E(M06-2X-DCM) = -5473.455484

|   |            |             |             |
|---|------------|-------------|-------------|
| O | 1.33079500 | -2.90167700 | -0.09056800 |
| O | 2.94779500 | -0.95293800 | -0.60229300 |
| P | 1.37827600 | -1.27199600 | -0.27927600 |
| O | 0.99905800 | -0.52458800 | 0.95685500  |
| C | 3.81349200 | -4.65771000 | 2.78920900  |
| C | 4.28073600 | -4.40672300 | 1.50345400  |
| C | 3.43295600 | -3.86651600 | 0.52469500  |
| C | 1.62635100 | -3.75585900 | 2.16464900  |
| C | 2.48961100 | -4.35024600 | 3.10052600  |
| C | 3.51018500 | -1.42216100 | -1.78965900 |
| C | 3.90219400 | -2.75488200 | -1.89093000 |
| C | 4.25574800 | -3.26557800 | -3.14990900 |
| C | 4.35198200 | -2.42515700 | -4.25423100 |
| C | 4.10606200 | -1.06002000 | -4.09234100 |

|   |             |             |             |
|---|-------------|-------------|-------------|
| C | 3.66947300  | -0.52974800 | -2.86818700 |
| H | 2.10801100  | -4.55035200 | 4.09757700  |
| H | 4.23088200  | -0.38396600 | -4.93330200 |
| C | 4.14669500  | -3.81868200 | -0.82295500 |
| C | 5.63827200  | -3.76026700 | -0.33858400 |
| H | 5.88656000  | -2.72064200 | -0.09563500 |
| H | 6.34011500  | -4.09972500 | -1.10646400 |
| H | 5.54566800  | -5.01334500 | -3.15153800 |
| H | 3.96707800  | -5.30294400 | -3.87333600 |
| C | 2.13281800  | -3.50532600 | 0.87459700  |
| H | 4.46839100  | -5.08167800 | 3.54629800  |
| H | 4.63240600  | -2.81688000 | -5.22888100 |
| C | 5.67172300  | -4.61197100 | 0.94693600  |
| H | 6.45621800  | -4.29688600 | 1.64434100  |
| H | 5.85717100  | -5.67165600 | 0.72039000  |
| C | 4.47899000  | -4.76179900 | -3.06920500 |
| C | 3.92281000  | -5.11403800 | -1.66960100 |
| H | 2.84655700  | -5.31022400 | -1.73546400 |
| H | 4.39777400  | -5.99349900 | -1.22286600 |
| C | 3.45374200  | 0.94317300  | -2.71263000 |
| C | 2.42374400  | 1.60530800  | -3.42393300 |
| C | 4.33951300  | 1.68578500  | -1.88992800 |
| C | 1.49548900  | 0.91500300  | -4.26788300 |
| C | 2.27411200  | 3.03842100  | -3.29461200 |
| C | 4.16062600  | 3.11302700  | -1.75121300 |
| C | 0.52354800  | 1.58802200  | -4.96000600 |
| H | 1.55093300  | -0.16456900 | -4.33016600 |
| C | 1.24488500  | 3.70296600  | -4.03371100 |
| C | 3.13323500  | 3.74943100  | -2.45324600 |
| C | 0.39947300  | 3.00239000  | -4.85229300 |
| H | -0.17593600 | 1.03371700  | -5.57860800 |
| H | 1.16096600  | 4.78352300  | -3.93820900 |
| H | 2.99796400  | 4.82240000  | -2.33785400 |
| H | -0.36926200 | 3.52061300  | -5.42082100 |
| C | 0.22307600  | -3.43417500 | 2.57424400  |
| C | -0.01265800 | -2.43263900 | 3.54740700  |
| C | -0.85619700 | -4.18952000 | 2.05471600  |
| C | 1.03124700  | -1.61330800 | 4.08920300  |
| C | -1.35868300 | -2.19831700 | 4.01961600  |
| C | -2.19936700 | -3.93117300 | 2.52146400  |
| C | 0.77325000  | -0.66515900 | 5.04595400  |
| H | 2.04083600  | -1.73593700 | 3.71556900  |
| C | -1.58476700 | -1.20170100 | 5.02116100  |
| C | -2.41278100 | -2.94904200 | 3.49244100  |

|   |             |             |             |
|---|-------------|-------------|-------------|
| C | -0.55232900 | -0.45956500 | 5.52671300  |
| H | 1.58271300  | -0.04925800 | 5.42762600  |
| H | -2.60288400 | -1.04764900 | 5.37208600  |
| H | -3.42386500 | -2.77195300 | 3.85545100  |
| H | -0.73775200 | 0.29417500  | 6.28729000  |
| C | 6.27610500  | 1.83493700  | -0.40263300 |
| H | 7.10311500  | 1.35298200  | 0.11207100  |
| C | 5.43995800  | 1.09024600  | -1.19266200 |
| H | 5.61639000  | 0.02669100  | -1.30353200 |
| C | 6.07522500  | 3.23547400  | -0.24759700 |
| H | 6.74369100  | 3.80903000  | 0.38900700  |
| C | 5.04789300  | 3.85328100  | -0.90794400 |
| H | 4.88173800  | 4.92132000  | -0.79839300 |
| C | -1.74210500 | -5.95485500 | 0.61452400  |
| H | -1.57677900 | -6.74093000 | -0.11732800 |
| C | -3.06495800 | -5.68638400 | 1.06737600  |
| H | -3.89618000 | -6.26871200 | 0.67876700  |
| C | -3.28165400 | -4.70449000 | 1.99624100  |
| H | -4.28548700 | -4.49798400 | 2.36111000  |
| C | -0.67882000 | -5.23577800 | 1.09368800  |
| H | 0.32225900  | -5.45930500 | 0.74329600  |
| N | 0.58583000  | -1.01536600 | -1.67348400 |
| S | -0.97483300 | -1.07921100 | -1.82883100 |
| O | -1.47390600 | -0.11076100 | -2.82226700 |
| O | -1.73172200 | -1.13623700 | -0.54330100 |
| C | -1.32048600 | -2.73535500 | -2.62463400 |
| F | -0.69202600 | -2.81390800 | -3.80279800 |
| F | -2.64021500 | -2.86017300 | -2.83276300 |
| F | -0.90968000 | -3.73528800 | -1.84341900 |
| C | -5.06129400 | 1.13260100  | -0.13055000 |
| C | -5.12156100 | 2.54615800  | -0.82640700 |
| H | -5.50735200 | 3.23625900  | -0.07879600 |
| H | -5.87060900 | 2.49242700  | -1.62738600 |
| C | -3.90044600 | 3.15578900  | -1.45039100 |
| C | -3.99517800 | 1.20265500  | 1.01140000  |
| H | -4.23420000 | 2.02679700  | 1.68475400  |
| H | -4.05302200 | 0.27520700  | 1.58982100  |
| N | -2.59703200 | 1.35415300  | 0.59008400  |
| C | -1.71198200 | 2.19819300  | 1.17969500  |
| N | -0.41778400 | 1.82748400  | 1.16980700  |
| C | 0.69059800  | 2.61649500  | 1.59449000  |
| C | 0.94288300  | 3.88532200  | 1.06840100  |
| C | 1.58005900  | 2.04989000  | 2.50811900  |
| C | 2.06367300  | 4.59685300  | 1.49243400  |

|   |              |              |              |
|---|--------------|--------------|--------------|
| C | 2. 70486900  | 2. 76902300  | 2. 91465300  |
| H | 1. 39969900  | 1. 04777600  | 2. 87786800  |
| C | 2. 95155700  | 4. 04734200  | 2. 41959900  |
| H | 3. 83059000  | 4. 59734200  | 2. 73144300  |
| C | 3. 62232900  | 2. 14883600  | 3. 93535100  |
| C | 2. 28924700  | 5. 98990200  | 0. 97103300  |
| F | 3. 06988900  | 2. 17648000  | 5. 17651100  |
| F | 3. 87741800  | 0. 85251400  | 3. 66014000  |
| F | 4. 80547600  | 2. 79256600  | 4. 01740300  |
| F | 1. 64996200  | 6. 91755600  | 1. 71907800  |
| F | 3. 59969500  | 6. 32677600  | 0. 96785400  |
| F | 1. 83360900  | 6. 13522300  | -0. 29769300 |
| S | -2. 23551900 | 3. 70731800  | 1. 84529800  |
| H | 0. 27981100  | 4. 30852100  | 0. 32589400  |
| H | -0. 15472500 | 0. 83858400  | 0. 99134800  |
| H | -2. 19750300 | 0. 50052100  | 0. 16882700  |
| C | -3. 38502000 | 4. 39001400  | -0. 94636500 |
| H | -2. 95652900 | 3. 99842300  | 0. 14097900  |
| C | -2. 19165300 | 5. 01839000  | -1. 67061900 |
| H | -1. 73969900 | 5. 78647200  | -1. 03552500 |
| H | -1. 41459400 | 4. 29044000  | -1. 91910800 |
| H | -2. 50591000 | 5. 50803900  | -2. 60153300 |
| C | -3. 27722000 | 2. 51417900  | -2. 64566500 |
| H | -3. 99649000 | 1. 88337500  | -3. 17080500 |
| H | -2. 88755200 | 3. 26499300  | -3. 33847300 |
| H | -2. 43427700 | 1. 85219500  | -2. 39586600 |
| C | -4. 35136600 | 5. 47389700  | -0. 41715700 |
| H | -5. 12397600 | 5. 09156900  | 0. 25108700  |
| H | -3. 77326500 | 6. 21393500  | 0. 14368900  |
| H | -4. 83628100 | 5. 98480600  | -1. 25713000 |
| C | -6. 40504900 | 0. 85989600  | 0. 59134800  |
| C | -7. 49894900 | 1. 73760700  | 0. 58290200  |
| C | -6. 55208000 | -0. 33965500 | 1. 31275600  |
| C | -8. 67969400 | 1. 43946100  | 1. 27001900  |
| H | -7. 46119400 | 2. 67111100  | 0. 03301000  |
| C | -7. 72365200 | -0. 63750500 | 2. 00449200  |
| H | -5. 74462900 | -1. 06466200 | 1. 32926500  |
| C | -8. 79766700 | 0. 25383300  | 1. 98936000  |
| H | -9. 50583900 | 2. 14486100  | 1. 23801800  |
| H | -7. 79751100 | -1. 57319800 | 2. 55230800  |
| H | -9. 71325000 | 0. 02341000  | 2. 52685700  |
| C | -4. 72814000 | -0. 06568600 | -1. 09307000 |
| H | -4. 27010300 | -0. 83371700 | -0. 47398600 |
| H | -3. 92818900 | 0. 23692200  | -1. 77391100 |

|   |             |             |             |
|---|-------------|-------------|-------------|
| C | -5.86368000 | -0.68932100 | -1.89630300 |
| C | -6.13579400 | -2.01220700 | -1.84368000 |
| C | -6.61926200 | 0.25687600  | -2.80774200 |
| H | -7.29907600 | 0.91420100  | -2.24773700 |
| H | -5.92358200 | 0.90378500  | -3.35888300 |
| H | -7.21864600 | -0.25849300 | -3.55911600 |
| C | -5.36790000 | -3.02876400 | -1.02265200 |
| H | -5.20075300 | -3.93350000 | -1.62107500 |
| H | -4.38748500 | -2.70097100 | -0.67722300 |
| H | -5.95486800 | -3.34394700 | -0.14731700 |
| C | -7.26445700 | -2.67406200 | -2.60828000 |
| H | -7.82345800 | -3.34055700 | -1.93758200 |
| H | -7.98447100 | -1.98124600 | -3.04603900 |
| H | -6.87078000 | -3.30979100 | -3.41431400 |

TS-EF-7SR-3

l imaginary frequency

H = -5472.479047

G = -5472.691046

E(M06-2X-DCM) = -5473.452750

|   |            |             |             |
|---|------------|-------------|-------------|
| O | 1.08101400 | -2.89969000 | 0.01688000  |
| O | 3.07217600 | -1.25038700 | -0.03611000 |
| P | 1.44138200 | -1.29727500 | -0.04501900 |
| O | 0.95134100 | -0.55564100 | 1.15825100  |
| C | 2.49640000 | -5.02834300 | 3.33635100  |
| C | 3.29122200 | -4.85679400 | 2.20797700  |
| C | 2.79408600 | -4.19499400 | 1.07529300  |
| C | 0.68576000 | -3.79976500 | 2.24012300  |
| C | 1.19847600 | -4.51927200 | 3.33315500  |
| C | 3.78219800 | -1.81689800 | -1.09705500 |
| C | 3.97769800 | -3.19650400 | -1.13575200 |
| C | 4.51827700 | -3.77619500 | -2.29442300 |
| C | 4.97713200 | -2.97965600 | -3.33803900 |
| C | 4.89997000 | -1.59176900 | -3.21570300 |
| C | 4.29160800 | -0.97854300 | -2.10823800 |
| H | 0.56264100 | -4.65478200 | 4.20329500  |
| H | 5.29531700 | -0.95650000 | -4.00285300 |
| C | 3.80527400 | -4.27030400 | -0.06364800 |
| C | 5.13060000 | -4.43872800 | 0.75822100  |
| H | 5.47023900 | -3.44809900 | 1.08173800  |
| H | 5.93371100 | -4.88970000 | 0.16739700  |
| H | 5.50201000 | -5.69452600 | -2.03219400 |
| H | 4.10708700 | -5.75978200 | -3.10337000 |
| C | 1.51888500 | -3.63350200 | 1.11732700  |



|   |              |              |              |
|---|--------------|--------------|--------------|
| H | 2. 87809000  | -5. 54568600 | 4. 21298600  |
| H | 5. 40365900  | -3. 42593700 | -4. 23300000 |
| C | 4. 72827800  | -5. 27511100 | 1. 99070500  |
| H | 5. 36149200  | -5. 07705900 | 2. 86301700  |
| H | 4. 80204400  | -6. 35251300 | 1. 78507000  |
| C | 4. 49407200  | -5. 28696100 | -2. 19332100 |
| C | 3. 58580600  | -5. 52856400 | -0. 96644300 |
| H | 2. 53632100  | -5. 55641700 | -1. 28132800 |
| H | 3. 80388300  | -6. 46405700 | -0. 44118800 |
| C | 4. 25183900  | 0. 51433200  | -2. 01528200 |
| C | 3. 51975500  | 1. 27109000  | -2. 96315500 |
| C | 5. 01820000  | 1. 17124300  | -1. 01881500 |
| C | 2. 70785000  | 0. 67060700  | -3. 97861700 |
| C | 3. 56238300  | 2. 71539000  | -2. 90884700 |
| C | 5. 03376200  | 2. 61535400  | -0. 96637500 |
| C | 2. 02211800  | 1. 43376400  | -4. 88626200 |
| H | 2. 60814900  | -0. 40733700 | -3. 99972200 |
| C | 2. 82969600  | 3. 47503200  | -3. 87412700 |
| C | 4. 31003100  | 3. 34667900  | -1. 91180100 |
| C | 2. 08817400  | 2. 85519400  | -4. 84291600 |
| H | 1. 39804000  | 0. 94915500  | -5. 63157300 |
| H | 2. 87459600  | 4. 56000300  | -3. 81329600 |
| H | 4. 32636200  | 4. 43286000  | -1. 86805800 |
| H | 1. 53612200  | 3. 44249300  | -5. 57238600 |
| C | -0. 71135300 | -3. 26868500 | 2. 32744600  |
| C | -1. 01396800 | -2. 24638500 | 3. 25993600  |
| C | -1. 74396900 | -3. 85647800 | 1. 55718400  |
| C | -0. 00512300 | -1. 56812300 | 4. 01884900  |
| C | -2. 38688700 | -1. 83892600 | 3. 45588200  |
| C | -3. 11142900 | -3. 43109400 | 1. 75323100  |
| C | -0. 32685400 | -0. 58318800 | 4. 91645800  |
| H | 1. 03286200  | -1. 82756100 | 3. 85189600  |
| C | -2. 68206500 | -0. 81787200 | 4. 41488900  |
| C | -3. 39792100 | -2. 44750500 | 2. 70526700  |
| C | -1. 68515300 | -0. 20702600 | 5. 12667500  |
| H | 0. 46220100  | -0. 07404600 | 5. 46393100  |
| H | -3. 72228000 | -0. 53558900 | 4. 56222100  |
| H | -4. 43315900 | -2. 15200900 | 2. 86876600  |
| H | -1. 92289200 | 0. 57020700  | 5. 84808200  |
| C | 6. 53340800  | 1. 13601300  | 0. 90153500  |
| H | 7. 12188500  | 0. 57436400  | 1. 62209900  |
| C | 5. 81317800  | 0. 47025800  | -0. 05522700 |
| H | 5. 84546100  | -0. 61250600 | -0. 09035700 |
| C | 6. 52223300  | 2. 55806400  | 0. 96371600  |

|   |             |             |             |
|---|-------------|-------------|-------------|
| H | 7.09536300  | 3.06809000  | 1.73334800  |
| C | 5.79773200  | 3.27296200  | 0.04901100  |
| H | 5.78163400  | 4.35944600  | 0.07693700  |
| C | -2.52290800 | -5.44380800 | -0.13055100 |
| H | -2.30790400 | -6.22099000 | -0.85882200 |
| C | -3.86741500 | -5.01654800 | 0.06171000  |
| H | -4.66562800 | -5.47288000 | -0.51766500 |
| C | -4.14930300 | -4.04257100 | 0.98182500  |
| H | -5.17407100 | -3.71877200 | 1.15151400  |
| C | -1.50188900 | -4.88884600 | 0.59535800  |
| H | -0.48560000 | -5.23271800 | 0.44243100  |
| N | 1.00259900  | -0.82352800 | -1.52889200 |
| S | -0.46678500 | -0.78081900 | -2.08060300 |
| O | -0.69294700 | 0.35345800  | -2.99140400 |
| O | -1.53105700 | -1.01604600 | -1.06032200 |
| C | -0.56156400 | -2.28042800 | -3.19435300 |
| F | 0.40456300  | -2.22227700 | -4.11960400 |
| F | -1.74773000 | -2.30886300 | -3.82236000 |
| F | -0.42247700 | -3.40588400 | -2.49051600 |
| C | -5.10282900 | 0.93274500  | -0.05735400 |
| C | -5.26002200 | 2.26550300  | -0.89261600 |
| H | -5.67020800 | 3.02589800  | -0.23282900 |
| H | -6.01993400 | 2.07203200  | -1.65721900 |
| C | -4.08138600 | 2.82341000  | -1.63407500 |
| C | -3.93035100 | 1.05961200  | 0.97628900  |
| H | -4.12532800 | 1.89320100  | 1.64914700  |
| H | -3.92868900 | 0.14226200  | 1.57620200  |
| N | -2.56689400 | 1.23324200  | 0.45709500  |
| C | -1.69545700 | 2.15119300  | 0.94592900  |
| N | -0.40016700 | 1.80552200  | 0.99705700  |
| C | 0.68392000  | 2.66226300  | 1.35104900  |
| C | 0.99287300  | 3.80171200  | 0.60779000  |
| C | 1.48269500  | 2.28802700  | 2.43312400  |
| C | 2.08331900  | 4.58719700  | 0.97862400  |
| C | 2.57404300  | 3.07991800  | 2.78950700  |
| H | 1.24972900  | 1.38230600  | 2.98005700  |
| C | 2.87543900  | 4.23687500  | 2.07303800  |
| H | 3.72347100  | 4.84893900  | 2.35470200  |
| C | 3.46156700  | 2.65034400  | 3.92872000  |
| C | 2.38379100  | 5.84893800  | 0.21560000  |
| F | 2.76684400  | 1.97759300  | 4.87582500  |
| F | 4.45507100  | 1.83631200  | 3.51593300  |
| F | 4.04440700  | 3.71123400  | 4.53260400  |
| F | 1.77615200  | 6.92617300  | 0.76343800  |

|   |              |              |              |
|---|--------------|--------------|--------------|
| F | 3. 71121000  | 6. 12243300  | 0. 19382600  |
| F | 1. 96830500  | 5. 77570300  | -1. 06924000 |
| S | -2. 24447200 | 3. 72562800  | 1. 42194300  |
| H | 0. 39842200  | 4. 06394200  | -0. 25799300 |
| H | -0. 12102700 | 0. 80265600  | 0. 96462300  |
| H | -2. 14044200 | 0. 39225900  | 0. 04280200  |
| C | -3. 55946400 | 4. 10194700  | -1. 31616500 |
| H | -3. 03576400 | 3. 80598200  | -0. 18603600 |
| C | -2. 41651600 | 4. 64501800  | -2. 17353400 |
| H | -1. 93135400 | 5. 48163700  | -1. 66138300 |
| H | -1. 65398800 | 3. 88959200  | -2. 38134900 |
| H | -2. 78897600 | 5. 02143600  | -3. 13543100 |
| C | -3. 51115900 | 2. 03635800  | -2. 77195000 |
| H | -4. 17322600 | 1. 21689900  | -3. 05573600 |
| H | -3. 36665800 | 2. 69106700  | -3. 64013700 |
| H | -2. 52245200 | 1. 60538200  | -2. 55857200 |
| C | -4. 47477900 | 5. 22922800  | -0. 80148600 |
| H | -5. 21307200 | 4. 90132700  | -0. 06837600 |
| H | -3. 86057900 | 6. 00003300  | -0. 32595900 |
| H | -5. 00455200 | 5. 69059000  | -1. 64338700 |
| C | -6. 33993500 | 0. 74865300  | 0. 86162100  |
| C | -6. 76236100 | 1. 78286400  | 1. 71544800  |
| C | -7. 01367300 | -0. 47956700 | 0. 95933500  |
| C | -7. 81601200 | 1. 60638800  | 2. 61244400  |
| H | -6. 26003800 | 2. 74627600  | 1. 70303700  |
| C | -8. 06768900 | -0. 66125000 | 1. 85694100  |
| H | -6. 74288700 | -1. 29996300 | 0. 30522800  |
| C | -8. 47563200 | 0. 38002900  | 2. 68913000  |
| H | -8. 11447100 | 2. 42982100  | 3. 25571100  |
| H | -8. 57186600 | -1. 62312800 | 1. 89848400  |
| H | -9. 29593100 | 0. 23883300  | 3. 38732600  |
| C | -4. 81088000 | -0. 30958000 | -0. 93650500 |
| H | -4. 71120800 | -1. 16385600 | -0. 25170300 |
| H | -3. 78914800 | -0. 19313400 | -1. 31054600 |
| C | -5. 59974300 | -0. 81133100 | -2. 15414500 |
| C | -6. 79360300 | -0. 46749900 | -2. 68914100 |
| C | -4. 77584200 | -1. 90748300 | -2. 82939000 |
| H | -4. 19761500 | -1. 51937300 | -3. 67811200 |
| H | -4. 04869900 | -2. 33617800 | -2. 13460400 |
| H | -5. 39884700 | -2. 72562500 | -3. 20169800 |
| C | -7. 83154300 | 0. 49965200  | -2. 16375700 |
| H | -8. 81069000 | 0. 00024200  | -2. 14196300 |
| H | -7. 65015800 | 0. 87445500  | -1. 16033200 |
| H | -7. 94977700 | 1. 35606800  | -2. 84450300 |

|   |             |             |             |
|---|-------------|-------------|-------------|
| C | -7.27043700 | -1.11977000 | -3.98033200 |
| H | -6.45689100 | -1.36914900 | -4.66562900 |
| H | -7.82852700 | -2.04648200 | -3.78007100 |
| H | -7.95676600 | -0.45118800 | -4.51304000 |

TS-EF-7SR-4

l imaginary frequency

H = -5472.484439

G = -5472.698151

E(M06-2X-DCM) = -5473.457044

|   |            |             |             |
|---|------------|-------------|-------------|
| O | 1.40530000 | -2.91715100 | -0.18050600 |
| O | 2.92581800 | -0.85914500 | -0.56281200 |
| P | 1.36263400 | -1.28349200 | -0.33544800 |
| O | 0.87778300 | -0.58839400 | 0.89535200  |
| C | 3.89389300 | -4.61814400 | 2.72861700  |
| C | 4.38748100 | -4.29664500 | 1.46876500  |
| C | 3.54256200 | -3.77399400 | 0.47785800  |
| C | 1.67565400 | -3.84125100 | 2.04992900  |
| C | 2.54232900 | -4.40849500 | 2.99904700  |
| C | 3.57336300 | -1.24347200 | -1.73696800 |
| C | 4.03336900 | -2.55014500 | -1.87720800 |
| C | 4.46311700 | -2.98887000 | -3.13911200 |
| C | 4.56619700 | -2.09610000 | -4.20115500 |
| C | 4.25942400 | -0.75009300 | -3.98868700 |
| C | 3.75028400 | -0.29434100 | -2.76241000 |
| H | 2.13785100 | -4.67096600 | 3.97239000  |
| H | 4.39608300 | -0.03057400 | -4.79089200 |
| C | 4.29674800 | -3.63974200 | -0.84153100 |
| C | 5.76646800 | -3.51693700 | -0.30403600 |
| H | 5.94900000 | -2.47385200 | -0.02085300 |
| H | 6.51060200 | -3.79250800 | -1.05751700 |
| H | 5.83717600 | -4.67108700 | -3.16387200 |
| H | 4.29901000 | -5.00733400 | -3.94972600 |
| C | 2.21073700 | -3.50497500 | 0.79139800  |
| H | 4.54812400 | -5.02575400 | 3.49519500  |
| H | 4.90314800 | -2.43060000 | -5.17919500 |
| C | 5.80540200 | -4.40608600 | 0.95521000  |
| H | 6.54764700 | -4.07094000 | 1.68860300  |
| H | 6.05706900 | -5.44624900 | 0.70341600  |
| C | 4.75725100 | -4.47494000 | -3.10824300 |
| C | 4.17397300 | -4.91119900 | -1.74300000 |
| H | 3.11329300 | -5.16323200 | -1.85464500 |
| H | 4.68224700 | -5.78023200 | -1.31268200 |
| C | 3.49801100 | 1.16499800  | -2.54246100 |

|   |              |              |              |
|---|--------------|--------------|--------------|
| C | 2. 48109500  | 1. 84487700  | -3. 25541400 |
| C | 4. 34676800  | 1. 88178100  | -1. 65965000 |
| C | 1. 58318100  | 1. 17727800  | -4. 14839800 |
| C | 2. 31190600  | 3. 27030800  | -3. 07460400 |
| C | 4. 15171200  | 3. 30186500  | -1. 47465300 |
| C | 0. 61895700  | 1. 86547500  | -4. 83696600 |
| H | 1. 65303500  | 0. 10158200  | -4. 24944700 |
| C | 1. 29384200  | 3. 95172600  | -3. 81353800 |
| C | 3. 14154700  | 3. 95667600  | -2. 18451200 |
| C | 0. 47618700  | 3. 27327700  | -4. 67833100 |
| H | -0. 06062900 | 1. 32602500  | -5. 48946500 |
| H | 1. 19512200  | 5. 02694400  | -3. 67958800 |
| H | 2. 99291400  | 5. 02367000  | -2. 03422200 |
| H | -0. 28525300 | 3. 80467100  | -5. 24447700 |
| C | 0. 23361700  | -3. 65840700 | 2. 40946600  |
| C | -0. 13783700 | -2. 69084400 | 3. 37327400  |
| C | -0. 74082100 | -4. 52641800 | 1. 85971300  |
| C | 0. 79897400  | -1. 77732100 | 3. 95728200  |
| C | -1. 51646400 | -2. 59812900 | 3. 79788600  |
| C | -2. 11742500 | -4. 41626400 | 2. 28559700  |
| C | 0. 41171500  | -0. 86344800 | 4. 90312000  |
| H | 1. 83116800  | -1. 80553000 | 3. 62874200  |
| C | -1. 87893300 | -1. 63018100 | 4. 78731600  |
| C | -2. 46658300 | -3. 45877500 | 3. 24202700  |
| C | -0. 94550000 | -0. 78967200 | 5. 33035800  |
| H | 1. 14485700  | -0. 17962200 | 5. 32084800  |
| H | -2. 91940500 | -1. 58186500 | 5. 10145000  |
| H | -3. 50228200 | -3. 38985000 | 3. 56980300  |
| H | -1. 23364800 | -0. 06085900 | 6. 08337900  |
| C | 6. 21981900  | 1. 98607600  | -0. 08893500 |
| H | 7. 02503800  | 1. 48896500  | 0. 44514600  |
| C | 5. 42324900  | 1. 26744400  | -0. 94116800 |
| H | 5. 61111400  | 0. 20963100  | -1. 08261300 |
| C | 6. 00685500  | 3. 37981200  | 0. 10495800  |
| H | 6. 64706700  | 3. 93305900  | 0. 78698000  |
| C | 5. 00437500  | 4. 01645300  | -0. 57519200 |
| H | 4. 82823300  | 5. 07961900  | -0. 43677500 |
| C | -1. 38403700 | -6. 38240800 | 0. 40503600  |
| H | -1. 11204400 | -7. 14703600 | -0. 31767700 |
| C | -2. 74072100 | -6. 26183800 | 0. 81974000  |
| H | -3. 49065600 | -6. 93366800 | 0. 41074600  |
| C | -3. 09178400 | -5. 30732400 | 1. 73572200  |
| H | -4. 12205300 | -5. 21205500 | 2. 07134500  |
| C | -0. 42090000 | -5. 54830300 | 0. 90911700  |

|   |             |             |             |
|---|-------------|-------------|-------------|
| H | 0.60836700  | -5.65891700 | 0.58735400  |
| N | 0.63213700  | -1.05243900 | -1.76670100 |
| S | -0.92071700 | -1.08646400 | -1.99991600 |
| O | -1.33495800 | -0.21619100 | -3.10943500 |
| O | -1.73434500 | -0.98667300 | -0.74917500 |
| C | -1.31452800 | -2.81013200 | -2.60858100 |
| F | -0.64333400 | -3.06080200 | -3.73805400 |
| F | -2.62862100 | -2.89549800 | -2.85874600 |
| F | -0.98718200 | -3.72428600 | -1.69419400 |
| C | -5.12046900 | 1.15858700  | -0.22778200 |
| C | -5.08024500 | 2.58597900  | -0.92432600 |
| H | -5.59130300 | 3.27240500  | -0.25075200 |
| H | -5.70950300 | 2.51672300  | -1.82355600 |
| C | -3.78764100 | 3.19201900  | -1.38275400 |
| C | -4.09464400 | 1.15246400  | 0.93977800  |
| H | -4.33099200 | 1.95211100  | 1.64165500  |
| H | -4.16619500 | 0.20093200  | 1.47330400  |
| N | -2.68714700 | 1.32612600  | 0.55641000  |
| C | -1.81312100 | 2.13699000  | 1.20270600  |
| N | -0.51517300 | 1.77727200  | 1.18093000  |
| C | 0.59105700  | 2.56870900  | 1.60565400  |
| C | 0.77601400  | 3.87796700  | 1.16050700  |
| C | 1.54449500  | 1.97192500  | 2.43677200  |
| C | 1.88472200  | 4.60570900  | 1.59150200  |
| C | 2.65768500  | 2.70543700  | 2.84361300  |
| H | 1.41355100  | 0.94218300  | 2.74368900  |
| C | 2.82945400  | 4.02963000  | 2.43878400  |
| H | 3.69322600  | 4.59616600  | 2.76499100  |
| C | 3.72400200  | 2.05729700  | 3.68751800  |
| C | 2.02508400  | 6.04166500  | 1.16550900  |
| F | 3.26129700  | 0.97326400  | 4.35223900  |
| F | 4.77238100  | 1.64714000  | 2.94282000  |
| F | 4.21306300  | 2.91791300  | 4.61074400  |
| F | 1.34677900  | 6.87871800  | 1.98239500  |
| F | 3.31416000  | 6.45162200  | 1.16815700  |
| F | 1.54067500  | 6.24538400  | -0.08506400 |
| S | -2.35750400 | 3.60984300  | 1.93950500  |
| H | 0.06827100  | 4.32792000  | 0.47831300  |
| H | -0.24753700 | 0.79672600  | 0.96159700  |
| H | -2.26828300 | 0.51611900  | 0.07071100  |
| C | -3.35512200 | 4.43854700  | -0.85547800 |
| H | -2.95106000 | 4.00759900  | 0.26361100  |
| C | -2.15437200 | 5.12744400  | -1.50759000 |
| H | -1.74369400 | 5.88386000  | -0.83175400 |

|   |              |             |             |
|---|--------------|-------------|-------------|
| H | -1.34759700  | 4.43918700  | -1.77012000 |
| H | -2.46034300  | 5.64257000  | -2.42772100 |
| C | -3.00733500  | 2.52545800  | -2.47281700 |
| H | -3.38701200  | 1.54454100  | -2.74410500 |
| H | -3.03833000  | 3.17319300  | -3.36271800 |
| H | -1.94631000  | 2.40873700  | -2.23488700 |
| C | -4.37461900  | 5.46520300  | -0.32124700 |
| H | -5.09269000  | 5.04585300  | 0.38499900  |
| H | -3.83316800  | 6.25889500  | 0.20152900  |
| H | -4.92609500  | 5.92251300  | -1.15109300 |
| C | -6.55461700  | 1.04870700  | 0.34005400  |
| C | -7.64607800  | 1.07133400  | -0.54580800 |
| C | -6.84039200  | 0.95383600  | 1.70991000  |
| C | -8.95979700  | 1.00775000  | -0.08856500 |
| H | -7.47267200  | 1.13151800  | -1.61602600 |
| C | -8.15798200  | 0.88361500  | 2.17344700  |
| H | -6.04424400  | 0.92801800  | 2.44496700  |
| C | -9.22431100  | 0.91282000  | 1.27925500  |
| H | -9.77799000  | 1.02845000  | -0.80368800 |
| H | -8.34188800  | 0.80842700  | 3.24188100  |
| H | -10.24785100 | 0.86123800  | 1.63991700  |
| C | -4.86713200  | 0.00654000  | -1.27563600 |
| H | -3.78861700  | -0.10534200 | -1.41812100 |
| H | -5.26200800  | 0.35560400  | -2.23022400 |
| C | -5.43675500  | -1.37339600 | -0.96788100 |
| C | -6.34677700  | -1.98213900 | -1.76007200 |
| C | -4.84296600  | -2.04728000 | 0.25411600  |
| H | -3.76870500  | -1.84685800 | 0.31590000  |
| H | -5.30819400  | -1.69029200 | 1.18455500  |
| H | -4.95120400  | -3.13258000 | 0.23571900  |
| C | -6.92589900  | -1.41602200 | -3.03974700 |
| H | -6.85586400  | -2.16296400 | -3.84218600 |
| H | -7.99639500  | -1.19592500 | -2.91753700 |
| H | -6.43885300  | -0.51007700 | -3.40506200 |
| C | -6.92237600  | -3.35407200 | -1.47198300 |
| H | -6.55585000  | -4.09352200 | -2.19867700 |
| H | -6.70417300  | -3.72882400 | -0.47165100 |
| H | -8.01541600  | -3.33085100 | -1.58016400 |

TS-EF-7RS

l imaginary frequency

H = -5472.486434

G = -5472.700716

E(M06-2X-DCM) = -5473.463276

|   |             |             |             |
|---|-------------|-------------|-------------|
| O | -0.43638500 | -2.70167800 | -1.08573100 |
| O | -2.54075900 | -1.46050700 | -0.19243500 |
| P | -0.90527600 | -1.38220600 | -0.23297300 |
| O | -0.54231200 | -0.09935400 | -0.92192400 |
| C | -1.55403600 | -2.78698200 | -5.11966900 |
| C | -2.43842500 | -3.19395300 | -4.12583400 |
| C | -2.02474200 | -3.24766500 | -2.78739100 |
| C | 0.17274300  | -2.39514800 | -3.42313800 |
| C | -0.25292500 | -2.43174900 | -4.76371700 |
| C | -3.17990900 | -2.58578300 | 0.33348900  |
| C | -3.30766600 | -3.73193200 | -0.45448800 |
| C | -3.81294000 | -4.90724600 | 0.12515300  |
| C | -4.28037100 | -4.91375200 | 1.43403600  |
| C | -4.25738900 | -3.72670400 | 2.16291100  |
| C | -3.70758500 | -2.54386100 | 1.64030200  |
| H | 0.45797700  | -2.15144400 | -5.53528300 |
| H | -4.66011000 | -3.70316600 | 3.17118100  |
| C | -3.07807000 | -3.95966400 | -1.94813600 |
| C | -4.36225300 | -3.62978500 | -2.78160700 |
| H | -4.71425300 | -2.62956200 | -2.50361000 |
| H | -5.17705000 | -4.33550400 | -2.59176400 |
| H | -4.74790200 | -6.30241200 | -1.24507300 |
| H | -3.36073500 | -6.97619200 | -0.39574200 |
| C | -0.76163000 | -2.77563200 | -2.43951000 |
| H | -1.86122200 | -2.75789700 | -6.16218900 |
| H | -4.67247200 | -5.82366300 | 1.88125900  |
| C | -3.88403600 | -3.62515900 | -4.25136200 |
| H | -4.47047000 | -2.94844000 | -4.88361500 |
| H | -3.96482200 | -4.62422500 | -4.70215900 |
| C | -3.75028800 | -6.05931300 | -0.85267900 |
| C | -2.82919900 | -5.50635300 | -1.95867700 |
| H | -1.78196900 | -5.69377600 | -1.69522100 |
| H | -3.01066100 | -5.95128200 | -2.94192100 |
| C | -3.80084900 | -1.30655500 | 2.48118600  |
| C | -3.08527100 | -1.21868900 | 3.70027700  |
| C | -4.73648600 | -0.29918200 | 2.13356700  |
| C | -2.10475500 | -2.18586200 | 4.09013900  |
| C | -3.33127100 | -0.11222400 | 4.59892100  |
| C | -4.95591200 | 0.81393500  | 3.03094900  |
| C | -1.43422700 | -2.08027700 | 5.27994200  |
| H | -1.86632900 | -2.99004900 | 3.40689500  |
| C | -2.62107000 | -0.04862100 | 5.83932900  |
| C | -4.25632200 | 0.87231400  | 4.23984500  |
| C | -1.70188500 | -1.00544300 | 6.17435600  |



|   |             |             |             |
|---|-------------|-------------|-------------|
| H | -0.67303300 | -2.81180700 | 5.53314700  |
| H | -2.82867400 | 0.78276100  | 6.50949600  |
| H | -4.44646900 | 1.69777600  | 4.92386200  |
| H | -1.16365000 | -0.94326700 | 7.11636300  |
| C | 1.58344800  | -2.00216500 | -3.11656900 |
| C | 2.05759700  | -0.72044400 | -3.49572600 |
| C | 2.47450200  | -2.94280000 | -2.53969000 |
| C | 1.20939900  | 0.29286300  | -4.05117900 |
| C | 3.45428300  | -0.39112200 | -3.31860700 |
| C | 3.85633800  | -2.57849600 | -2.32192500 |
| C | 1.70656900  | 1.50856400  | -4.44579500 |
| H | 0.15105900  | 0.08712700  | -4.15321400 |
| C | 3.93731400  | 0.88289000  | -3.75883000 |
| C | 4.31139000  | -1.32006100 | -2.72360500 |
| C | 3.09280700  | 1.80787600  | -4.31243800 |
| H | 1.03631700  | 2.25244800  | -4.86914800 |
| H | 4.99722700  | 1.09535800  | -3.64246800 |
| H | 5.35482900  | -1.05424200 | -2.56847900 |
| H | 3.47360200  | 2.76857300  | -4.64912500 |
| C | -6.43992600 | 0.62782600  | 0.64258200  |
| H | -7.02587700 | 0.55969200  | -0.26975500 |
| C | -5.52480400 | -0.34840700 | 0.93860700  |
| H | -5.39644500 | -1.18485000 | 0.26158400  |
| C | -6.63616600 | 1.73231400  | 1.52025700  |
| H | -7.36954200 | 2.49481600  | 1.27147200  |
| C | -5.91220000 | 1.81824000  | 2.67924000  |
| H | -6.06434800 | 2.64613500  | 3.36851800  |
| C | 2.96487100  | -5.15149200 | -1.61380300 |
| H | 2.63326600  | -6.15139900 | -1.34701100 |
| C | 4.31592400  | -4.77469700 | -1.37229400 |
| H | 5.00088700  | -5.48475200 | -0.91697800 |
| C | 4.74578500  | -3.52453000 | -1.72367700 |
| H | 5.77783800  | -3.22461400 | -1.55853100 |
| C | 2.08073200  | -4.27107300 | -2.17972800 |
| H | 1.06030400  | -4.58493700 | -2.36417400 |
| C | -1.79980200 | 3.83822800  | -0.46765600 |
| C | -1.79146700 | 4.07707100  | 1.10669700  |
| H | -1.64889400 | 5.14477200  | 1.26200200  |
| H | -2.80124700 | 3.84413100  | 1.47135300  |
| C | -0.85782300 | 3.31074100  | 2.00471300  |
| C | -0.34748300 | 3.63253600  | -0.97345600 |
| H | 0.24117500  | 4.52910200  | -0.77921900 |
| H | -0.36206400 | 3.47208800  | -2.05408800 |
| N | 0.38440300  | 2.49900900  | -0.39208700 |

|   |              |              |              |
|---|--------------|--------------|--------------|
| C | 1. 67183300  | 2. 55010700  | -0. 00133800 |
| N | 2. 36758500  | 1. 40403900  | 0. 06285100  |
| C | 3. 73848900  | 1. 30271300  | 0. 47147600  |
| C | 4. 06792700  | 0. 70789300  | 1. 68933900  |
| C | 4. 73616800  | 1. 72624600  | -0. 40361900 |
| C | 5. 41391300  | 0. 54646200  | 2. 02451500  |
| C | 6. 07656900  | 1. 54895300  | -0. 06056600 |
| H | 4. 46157700  | 2. 16367100  | -1. 35648300 |
| C | 6. 42314900  | 0. 96065300  | 1. 15510500  |
| H | 7. 46406500  | 0. 81644300  | 1. 41693100  |
| C | 7. 13105700  | 1. 92177500  | -1. 06587800 |
| C | 5. 76603000  | -0. 05231000 | 3. 36263200  |
| F | 7. 17738600  | 1. 02176500  | -2. 08739800 |
| F | 8. 36480500  | 1. 96643400  | -0. 52639100 |
| F | 6. 88349200  | 3. 12314900  | -1. 63064000 |
| F | 5. 66508300  | 0. 86475300  | 4. 35375800  |
| F | 7. 03459000  | -0. 51971700 | 3. 38576000  |
| F | 4. 94722000  | -1. 07196300 | 3. 68336300  |
| S | 2. 37107300  | 4. 03904200  | 0. 57450600  |
| H | 3. 28470400  | 0. 35435200  | 2. 35104500  |
| H | 1. 91296200  | 0. 50621200  | -0. 14009900 |
| H | 0. 02128500  | 1. 55651700  | -0. 61903000 |
| C | 0. 17948000  | 3. 96166600  | 2. 69725800  |
| H | 1. 07973300  | 3. 97268700  | 1. 69163800  |
| N | -0. 43200200 | -1. 65968400 | 1. 28618900  |
| S | 1. 09129000  | -1. 60953800 | 1. 71782900  |
| O | 1. 29030400  | -0. 80191900 | 2. 93627400  |
| O | 2. 03945900  | -1. 37004400 | 0. 60059300  |
| C | 1. 45199600  | -3. 36508100 | 2. 24619300  |
| F | 0. 64673700  | -3. 73175300 | 3. 25554700  |
| F | 2. 71996700  | -3. 44878800 | 2. 65986300  |
| F | 1. 26646700  | -4. 20247000 | 1. 22369000  |
| C | 0. 90633400  | 3. 21840300  | 3. 81886100  |
| H | 1. 09934600  | 2. 16826200  | 3. 59024300  |
| H | 1. 86780300  | 3. 69848100  | 4. 02495400  |
| H | 0. 31437600  | 3. 25267000  | 4. 74309500  |
| C | -1. 16423300 | 1. 86517400  | 2. 25341900  |
| H | -0. 28262900 | 1. 22671500  | 2. 34233900  |
| H | -1. 68083300 | 1. 78984200  | 3. 22277900  |
| H | -1. 82921900 | 1. 44056100  | 1. 50269500  |
| C | 0. 16934700  | 5. 48315600  | 2. 91809200  |
| H | 1. 15681100  | 5. 80221200  | 3. 26538100  |
| H | -0. 05639500 | 6. 05721000  | 2. 01725800  |
| H | -0. 55801400 | 5. 75392400  | 3. 69335600  |

|   |             |            |             |
|---|-------------|------------|-------------|
| C | -2.36664700 | 5.13890300 | -1.08689200 |
| C | -3.54662400 | 5.69924000 | -0.56691200 |
| C | -1.75734200 | 5.81217800 | -2.15667700 |
| C | -4.08945300 | 6.87417700 | -1.08355500 |
| H | -4.06022500 | 5.21223500 | 0.25641500  |
| C | -2.29887900 | 6.98942200 | -2.67998400 |
| H | -0.84673100 | 5.43338700 | -2.60593900 |
| C | -3.46638400 | 7.52933400 | -2.14671500 |
| H | -5.00187400 | 7.27726300 | -0.65165100 |
| H | -1.79694900 | 7.48275100 | -3.50817400 |
| H | -3.88532300 | 8.44663800 | -2.55102300 |
| C | -2.74719100 | 2.63278400 | -0.84953700 |
| H | -3.63035200 | 2.71217700 | -0.21250400 |
| H | -2.25635000 | 1.69427100 | -0.56931100 |
| C | -3.17185700 | 2.52113800 | -2.30991200 |
| C | -4.41107100 | 2.82843100 | -2.75123900 |
| C | -2.11547000 | 1.96993400 | -3.25544100 |
| H | -2.54924900 | 1.33190200 | -4.03057300 |
| H | -1.55798500 | 2.76402600 | -3.77495600 |
| H | -1.39535600 | 1.35237300 | -2.71289900 |
| C | -4.80852700 | 2.73181200 | -4.21040200 |
| H | -5.50064800 | 1.89274700 | -4.37617100 |
| H | -5.34878000 | 3.63927600 | -4.51205900 |
| H | -3.96588600 | 2.61269700 | -4.89294200 |
| C | -5.56587500 | 3.29797000 | -1.89604600 |
| H | -6.47048100 | 2.72763000 | -2.15022100 |
| H | -5.40640600 | 3.19126000 | -0.82260000 |
| H | -5.79553800 | 4.35284800 | -2.09843400 |

TS-EF-7RS-1

l imaginary frequency

H = -5472.483705

G = -5472.697765

E(M06-2X-DCM) = -5473.463114

|   |             |             |             |
|---|-------------|-------------|-------------|
| O | -0.43117100 | -2.75053300 | -0.98231400 |
| O | -2.54732400 | -1.45120000 | -0.20998100 |
| P | -0.91120600 | -1.39637100 | -0.19262100 |
| O | -0.50717300 | -0.14336200 | -0.91431600 |
| C | -1.42336100 | -2.99047000 | -5.04343900 |
| C | -2.34347200 | -3.34615600 | -4.06222700 |
| C | -1.97273900 | -3.34861600 | -2.71003600 |
| C | 0.25441000  | -2.54801900 | -3.30992000 |
| C | -0.12978400 | -2.63599700 | -4.66080500 |
| C | -3.22257100 | -2.54404400 | 0.33868200  |

|   |             |             |             |
|---|-------------|-------------|-------------|
| C | -3.33794300 | -3.72118300 | -0.40361800 |
| C | -3.87949200 | -4.86415900 | 0.20677600  |
| C | -4.39523200 | -4.80747000 | 1.49624700  |
| C | -4.38344400 | -3.58983300 | 2.17315400  |
| C | -3.79771000 | -2.43779400 | 1.62115900  |
| H | 0.60860800  | -2.39674200 | -5.42017100 |
| H | -4.82315000 | -3.51731500 | 3.16344200  |
| C | -3.06072400 | -4.01465900 | -1.87707400 |
| C | -4.31371200 | -3.70755400 | -2.76512400 |
| H | -4.66322600 | -2.69303700 | -2.54087500 |
| H | -5.14210600 | -4.39639900 | -2.57244800 |
| H | -4.78168100 | -6.30858900 | -1.13447300 |
| H | -3.43256600 | -6.95798800 | -0.20846700 |
| C | -0.71528700 | -2.87598000 | -2.34153900 |
| H | -1.69677200 | -3.00272300 | -6.09565300 |
| H | -4.81608600 | -5.69200700 | 1.96758300  |
| C | -3.78844400 | -3.76961800 | -4.21707200 |
| H | -4.34738100 | -3.11584500 | -4.89660200 |
| H | -3.86420400 | -4.78634800 | -4.62743000 |
| C | -3.79577000 | -6.05813400 | -0.71792900 |
| C | -2.83031200 | -5.56285200 | -1.81372300 |
| H | -1.79507700 | -5.75010400 | -1.50642400 |
| H | -2.98350100 | -6.04735200 | -2.78297500 |
| C | -3.90174500 | -1.16418800 | 2.40379600  |
| C | -3.24160300 | -1.04205900 | 3.65099300  |
| C | -4.79328600 | -0.14989000 | 1.97018800  |
| C | -2.29441300 | -2.00774900 | 4.11985400  |
| C | -3.50918600 | 0.10108000  | 4.49583200  |
| C | -5.03182100 | 1.00073400  | 2.81384700  |
| C | -1.67769700 | -1.86820000 | 5.33503100  |
| H | -2.03536500 | -2.83832400 | 3.47665300  |
| C | -2.85755000 | 0.19863800  | 5.76587000  |
| C | -4.39528100 | 1.08850800  | 4.05547800  |
| C | -1.97068600 | -0.75868900 | 6.17778600  |
| H | -0.93953400 | -2.59989700 | 5.64894100  |
| H | -3.08207200 | 1.05710400  | 6.39516500  |
| H | -4.60176500 | 1.94240600  | 4.69861800  |
| H | -1.47626500 | -0.67025200 | 7.14146600  |
| C | 1.66084400  | -2.15821100 | -2.98030100 |
| C | 2.16376800  | -0.90482700 | -3.41406500 |
| C | 2.52325200  | -3.07927800 | -2.33257400 |
| C | 1.34335000  | 0.09163200  | -4.03736100 |
| C | 3.56181800  | -0.58846600 | -3.22582800 |
| C | 3.90517500  | -2.72325700 | -2.10122800 |

|   |              |              |              |
|---|--------------|--------------|--------------|
| C | 1. 86877500  | 1. 27550300  | -4. 48733600 |
| H | 0. 28343200  | -0. 10079700 | -4. 14580400 |
| C | 4. 07532000  | 0. 65106000  | -3. 72596800 |
| C | 4. 38999200  | -1. 49634500 | -2. 56145500 |
| C | 3. 25759500  | 1. 55803400  | -4. 34565900 |
| H | 1. 21962000  | 2. 00781200  | -4. 96116800 |
| H | 5. 13575200  | 0. 85356500  | -3. 59891000 |
| H | 5. 43408600  | -1. 23857200 | -2. 39754700 |
| H | 3. 66129000  | 2. 49243100  | -4. 72673300 |
| C | -6. 38258200 | 0. 76665500  | 0. 35144400  |
| H | -6. 91594900 | 0. 68135400  | -0. 59130900 |
| C | -5. 51551800 | -0. 22300700 | 0. 73526900  |
| H | -5. 37329200 | -1. 08681600 | 0. 09654600  |
| C | -6. 59823600 | 1. 90637400  | 1. 17774100  |
| H | -7. 29339600 | 2. 67880600  | 0. 85989000  |
| C | -5. 94051500 | 2. 01455300  | 2. 37385900  |
| H | -6. 10890800 | 2. 87033100  | 3. 02421600  |
| C | 2. 95786000  | -5. 24121200 | -1. 27748000 |
| H | 2. 60478900  | -6. 22051100 | -0. 96563000 |
| C | 4. 30804100  | -4. 87037400 | -1. 02234400 |
| H | 4. 97075400  | -5. 56382200 | -0. 51185700 |
| C | 4. 76528400  | -3. 64741800 | -1. 43027200 |
| H | 5. 79745000  | -3. 35320900 | -1. 25582400 |
| C | 2. 10119500  | -4. 38087300 | -1. 91233000 |
| H | 1. 08116000  | -4. 69063200 | -2. 10529100 |
| C | -1. 82633700 | 3. 89469200  | -0. 52598300 |
| C | -1. 70749900 | 4. 17739100  | 1. 02588400  |
| H | -1. 43352100 | 5. 22435300  | 1. 13547700  |
| H | -2. 71823200 | 4. 07728000  | 1. 44740500  |
| C | -0. 82795500 | 3. 34394500  | 1. 91701300  |
| C | -0. 42027000 | 3. 59476300  | -1. 12647500 |
| H | 0. 20462400  | 4. 48677300  | -1. 07639400 |
| H | -0. 54216300 | 3. 32228500  | -2. 17846800 |
| N | 0. 33170400  | 2. 49344400  | -0. 50830100 |
| C | 1. 61796300  | 2. 55945200  | -0. 12120900 |
| N | 2. 30886700  | 1. 41337900  | -0. 00364500 |
| C | 3. 67221600  | 1. 32202500  | 0. 43393200  |
| C | 3. 97389800  | 0. 77631800  | 1. 68123000  |
| C | 4. 69017900  | 1. 70988200  | -0. 43481500 |
| C | 5. 31176800  | 0. 62524400  | 2. 05254200  |
| C | 6. 02195600  | 1. 54482200  | -0. 05470300 |
| H | 4. 43844300  | 2. 11063000  | -1. 40959100 |
| C | 6. 34047300  | 1. 00385800  | 1. 19081100  |
| H | 7. 37507200  | 0. 87036900  | 1. 48186600  |

|   |              |              |              |
|---|--------------|--------------|--------------|
| C | 7. 10379800  | 1. 87094100  | -1. 04708300 |
| C | 5. 62864800  | 0. 07534200  | 3. 42000700  |
| F | 7. 22803600  | 0. 88811900  | -1. 98225800 |
| F | 8. 31099900  | 2. 00983700  | -0. 46441600 |
| F | 6. 83875000  | 3. 00827600  | -1. 72476100 |
| F | 5. 46432900  | 1. 01720400  | 4. 37894000  |
| F | 6. 90714100  | -0. 35613000 | 3. 50515000  |
| F | 4. 82519200  | -0. 95700800 | 3. 73954700  |
| S | 2. 31715500  | 4. 07014200  | 0. 39682900  |
| H | 3. 17679000  | 0. 45158400  | 2. 34054700  |
| H | 1. 84788900  | 0. 51397000  | -0. 18003300 |
| H | -0. 02767500 | 1. 53961500  | -0. 68727000 |
| C | 0. 23117400  | 3. 93501600  | 2. 62677900  |
| H | 1. 10201500  | 3. 97380900  | 1. 57630200  |
| N | -0. 49118300 | -1. 62374700 | 1. 34946000  |
| S | 1. 01956100  | -1. 54945600 | 1. 82459300  |
| O | 1. 18151900  | -0. 68042100 | 3. 00630200  |
| O | 2. 00080100  | -1. 36587500 | 0. 72710200  |
| C | 1. 35445700  | -3. 27473400 | 2. 45768000  |
| F | 0. 50988900  | -3. 58607900 | 3. 45315800  |
| F | 2. 60559400  | -3. 33813100 | 2. 92296300  |
| F | 1. 20519300  | -4. 16451900 | 1. 47402600  |
| C | 0. 95386600  | 3. 13331200  | 3. 70812700  |
| H | 1. 07858700  | 2. 07684800  | 3. 46337700  |
| H | 1. 94704000  | 3. 55720600  | 3. 88700100  |
| H | 0. 39864800  | 3. 18831200  | 4. 65408300  |
| C | -1. 20707200 | 1. 91129900  | 2. 13709200  |
| H | -0. 35876300 | 1. 23592500  | 2. 26092500  |
| H | -1. 76783400 | 1. 85384200  | 3. 08287700  |
| H | -1. 85590500 | 1. 51947200  | 1. 35557700  |
| C | 0. 28256800  | 5. 44664900  | 2. 90563400  |
| H | 1. 28773800  | 5. 71387000  | 3. 24577900  |
| H | 0. 06084000  | 6. 06866400  | 2. 03644200  |
| H | -0. 41895100 | 5. 70903500  | 3. 70720400  |
| C | -2. 34790800 | 5. 20526900  | -1. 17258000 |
| C | -3. 23605200 | 6. 05404900  | -0. 48916100 |
| C | -1. 98447800 | 5. 58488200  | -2. 47596300 |
| C | -3. 72665200 | 7. 22477200  | -1. 06789400 |
| H | -3. 56983300 | 5. 80537900  | 0. 51245500  |
| C | -2. 47059400 | 6. 75623400  | -3. 05912000 |
| H | -1. 31798900 | 4. 96690700  | -3. 06522700 |
| C | -3. 34383700 | 7. 58657000  | -2. 35848700 |
| H | -4. 41159800 | 7. 85229700  | -0. 50362800 |
| H | -2. 16072200 | 7. 01586500  | -4. 06797200 |

|   |             |            |             |
|---|-------------|------------|-------------|
| H | -3.72083400 | 8.49941200 | -2.81129300 |
| C | -2.82687500 | 2.69726000 | -0.83460900 |
| H | -3.52957900 | 2.63139100 | 0.00340100  |
| H | -2.26685800 | 1.75895600 | -0.82456000 |
| C | -3.65854100 | 2.80309000 | -2.10965800 |
| C | -3.33670600 | 2.21512600 | -3.28134600 |
| C | -4.95735600 | 3.59102400 | -1.97222300 |
| H | -5.81571700 | 3.01477500 | -2.33664800 |
| H | -5.16019700 | 3.83665300 | -0.92676400 |
| H | -4.93773900 | 4.53708600 | -2.52627400 |
| C | -4.20054500 | 2.35182400 | -4.51769500 |
| H | -3.58035700 | 2.60412500 | -5.38880000 |
| H | -4.68974800 | 1.39612500 | -4.75785700 |
| H | -4.97673500 | 3.11418300 | -4.43333800 |
| C | -2.11927300 | 1.35767900 | -3.52955500 |
| H | -1.40460600 | 1.87759200 | -4.18610400 |
| H | -1.59254200 | 1.04092600 | -2.62962800 |
| H | -2.40809000 | 0.44289800 | -4.06616200 |

TS-EF-7RS-2

l imaginary frequency

H = -5472.479376

G = -5472.693545

E(M06-2X-DCM) = -5473.456880

|   |             |             |             |
|---|-------------|-------------|-------------|
| O | -0.76859000 | -2.49758100 | -1.22498000 |
| O | -2.62500800 | -1.42414500 | 0.25005300  |
| P | -1.04252500 | -1.28064500 | -0.15806200 |
| O | -0.87105800 | 0.08105800  | -0.76611600 |
| C | -2.84238300 | -2.42540500 | -4.85701300 |
| C | -3.43843700 | -2.92968200 | -3.70526500 |
| C | -2.70703700 | -3.02935800 | -2.51352200 |
| C | -0.76860600 | -2.03117300 | -3.61107400 |
| C | -1.50816700 | -2.02043100 | -4.80764000 |
| C | -3.09385600 | -2.60372700 | 0.83358300  |
| C | -3.35619800 | -3.71186400 | 0.02561300  |
| C | -3.65888900 | -4.94262800 | 0.63187400  |
| C | -3.80502300 | -5.04318400 | 2.01038400  |
| C | -3.67398500 | -3.89282600 | 2.78722000  |
| C | -3.31724700 | -2.65687800 | 2.22560700  |
| H | -1.01968600 | -1.66789500 | -5.71127400 |
| H | -3.83829300 | -3.94101600 | 3.85986900  |
| C | -3.48708500 | -3.84650300 | -1.49130900 |
| C | -4.95061500 | -3.55066800 | -1.96515400 |
| H | -5.26846500 | -2.59023100 | -1.54295300 |

|   |             |             |             |
|---|-------------|-------------|-------------|
| H | -5.66083100 | -4.31357800 | -1.63123200 |
| H | -4.82796100 | -6.32188700 | -0.56480300 |
| H | -3.24603700 | -6.94989400 | -0.11485900 |
| C | -1.41794200 | -2.50665300 | -2.45403600 |
| H | -3.39725900 | -2.36073000 | -5.78970300 |
| H | -4.03676000 | -5.99682300 | 2.47792200  |
| C | -4.85014000 | -3.43755500 | -3.50347400 |
| H | -5.60348800 | -2.76333100 | -3.92718200 |
| H | -4.99527500 | -4.41361200 | -3.98733400 |
| C | -3.77826600 | -6.03701600 | -0.40575000 |
| C | -3.17826700 | -5.37268900 | -1.66167300 |
| H | -2.09091500 | -5.51013600 | -1.66825500 |
| H | -3.57193200 | -5.77593700 | -2.59989400 |
| C | -3.29772300 | -1.44996700 | 3.11547200  |
| C | -2.25811700 | -1.25281500 | 4.05373600  |
| C | -4.41353400 | -0.57557500 | 3.09546000  |
| C | -1.13770000 | -2.13641600 | 4.15939100  |
| C | -2.31350200 | -0.12308300 | 4.95620400  |
| C | -4.45252600 | 0.55556400  | 3.99504200  |
| C | -0.14928700 | -1.92461400 | 5.08294800  |
| H | -1.06330600 | -2.96749100 | 3.47128200  |
| C | -1.26048600 | 0.06075800  | 5.90711600  |
| C | -3.39761800 | 0.75734300  | 4.89073400  |
| C | -0.21009900 | -0.81425500 | 5.97227500  |
| H | 0.70309100  | -2.59567900 | 5.11784000  |
| H | -1.31920600 | 0.91157700  | 6.58255100  |
| H | -3.43861800 | 1.60155600  | 5.57715200  |
| H | 0.58496200  | -0.66344800 | 6.69770300  |
| C | 0.66172500  | -1.59275700 | -3.62108300 |
| C | 0.99625900  | -0.27146000 | -4.01495200 |
| C | 1.68937700  | -2.52245800 | -3.31802200 |
| C | 0.01270400  | 0.72184100  | -4.33161300 |
| C | 2.38645800  | 0.11620700  | -4.11495700 |
| C | 3.07234700  | -2.10588500 | -3.37520000 |
| C | 0.37126400  | 1.97085200  | -4.77289100 |
| H | -1.03564900 | 0.47260700  | -4.21934600 |
| C | 2.71744000  | 1.43384900  | -4.56326400 |
| C | 3.38374400  | -0.80494300 | -3.78104800 |
| C | 1.74290800  | 2.33492800  | -4.89855300 |
| H | -0.39983700 | 2.69205400  | -5.03254400 |
| H | 3.76913500  | 1.69952600  | -4.64252600 |
| H | 4.42875800  | -0.50814500 | -3.85070200 |
| H | 2.00954900  | 3.32593400  | -5.25657900 |
| C | -6.63228600 | 0.05444100  | 2.27915100  |



|   |             |             |             |
|---|-------------|-------------|-------------|
| H | -7.48630900 | -0.14028500 | 1.63573000  |
| C | -5.55112700 | -0.78809000 | 2.25088200  |
| H | -5.55558100 | -1.64646000 | 1.58854000  |
| C | -6.65059100 | 1.18489700  | 3.14462200  |
| H | -7.51372800 | 1.84533500  | 3.15136200  |
| C | -5.58821700 | 1.42490900  | 3.97481800  |
| H | -5.59658500 | 2.27484300  | 4.65382800  |
| C | 2.44461600  | -4.75460100 | -2.67093000 |
| H | 2.21378900  | -5.78373600 | -2.40963100 |
| C | 3.80091300  | -4.32374100 | -2.68551000 |
| H | 4.59130200  | -5.02139500 | -2.42289000 |
| C | 4.10371200  | -3.03652600 | -3.03515100 |
| H | 5.13422500  | -2.69246600 | -3.04963400 |
| C | 1.42906100  | -3.88780400 | -2.97696200 |
| H | 0.40482700  | -4.24034300 | -2.96468700 |
| C | -1.28976700 | 4.01978600  | -1.00575600 |
| C | -1.65711100 | 3.89069300  | 0.54013600  |
| H | -2.09496600 | 4.83574300  | 0.86636300  |
| H | -2.44261400 | 3.13935600  | 0.62580100  |
| C | -0.60118000 | 3.53603600  | 1.56588900  |
| C | 0.19879000  | 3.66204100  | -1.27477400 |
| H | 0.84122400  | 4.49415800  | -0.99523200 |
| H | 0.32821400  | 3.49280100  | -2.34924400 |
| N | 0.72543700  | 2.47356200  | -0.59167400 |
| C | 1.99128400  | 2.40663400  | -0.12577400 |
| N | 2.56858800  | 1.20018100  | -0.03026400 |
| C | 3.87831100  | 0.91133900  | 0.46587600  |
| C | 4.26440700  | 1.19963500  | 1.77443100  |
| C | 4.74995100  | 0.24756200  | -0.39533600 |
| C | 5.54789500  | 0.85763700  | 2.19834000  |
| C | 6.02502900  | -0.10631700 | 0.04528700  |
| H | 4.42260300  | 0.00314800  | -1.39888600 |
| C | 6.43506200  | 0.20522700  | 1.34028600  |
| H | 7.42777000  | -0.06381900 | 1.68155700  |
| C | 6.93589100  | -0.87649100 | -0.87367700 |
| C | 6.00222900  | 1.23731100  | 3.58349500  |
| F | 6.72637100  | -2.20915200 | -0.79127800 |
| F | 8.23768900  | -0.66118000 | -0.58972300 |
| F | 6.74209200  | -0.53463200 | -2.17261600 |
| F | 6.63460100  | 2.43502300  | 3.58390600  |
| F | 6.87206900  | 0.33634800  | 4.08898000  |
| F | 4.96830000  | 1.33834300  | 4.44463900  |
| S | 2.80738000  | 3.84259900  | 0.42211700  |
| H | 3.57012800  | 1.66829100  | 2.45828900  |

|   |             |             |             |
|---|-------------|-------------|-------------|
| H | 2.07767400  | 0.36139400  | -0.36895400 |
| H | 0.24136300  | 1.57762000  | -0.77036600 |
| C | 0.30773000  | 4.48588000  | 2.06154000  |
| H | 1.34877400  | 4.18124300  | 1.25982000  |
| N | -0.22196800 | -1.69271300 | 1.16827700  |
| S | 1.35508300  | -1.83358400 | 1.20776800  |
| O | 1.93386000  | -1.24206300 | 2.42097200  |
| O | 2.02152600  | -1.51732200 | -0.08540200 |
| C | 1.62224300  | -3.67229600 | 1.40728800  |
| F | 1.09009400  | -4.09379600 | 2.56671600  |
| F | 2.93287500  | -3.93525300 | 1.42133100  |
| F | 1.05251100  | -4.34757400 | 0.40563000  |
| C | -1.53282900 | 5.46708000  | -1.50099600 |
| C | -0.69680600 | 6.08538900  | -2.44711800 |
| C | -2.64830400 | 6.20309600  | -1.06134100 |
| C | -0.94804500 | 7.37941100  | -2.91080400 |
| H | 0.16997600  | 5.56886500  | -2.84326300 |
| C | -2.90197600 | 7.49466200  | -1.52065400 |
| H | -3.35518400 | 5.75508600  | -0.37067100 |
| C | -2.04897600 | 8.09532100  | -2.44682600 |
| H | -0.27261300 | 7.82402900  | -3.63691600 |
| H | -3.77434500 | 8.02933900  | -1.15393500 |
| H | -2.24268000 | 9.10305200  | -2.80354700 |
| C | -2.17300500 | 3.01320700  | -1.85301900 |
| H | -1.73249700 | 3.00948100  | -2.85788700 |
| H | -2.00340500 | 2.01151600  | -1.45100600 |
| C | -3.65909200 | 3.29498200  | -2.01139500 |
| C | -4.61778900 | 2.67644500  | -1.28783700 |
| C | -4.02821800 | 4.22608000  | -3.16295300 |
| H | -4.56393200 | 3.67974300  | -3.95113600 |
| H | -4.66883600 | 5.05998100  | -2.85714900 |
| H | -3.13909900 | 4.66626300  | -3.62023700 |
| C | -0.67979800 | 2.15115500  | 2.13652800  |
| H | -1.06683900 | 1.43652800  | 1.40877500  |
| H | 0.27139800  | 1.77428000  | 2.51982700  |
| H | -1.37863000 | 2.15818600  | 2.98855500  |
| C | 0.97200600  | 4.26780700  | 3.42543600  |
| H | 1.87080200  | 4.88702000  | 3.50760400  |
| H | 0.28618700  | 4.56879100  | 4.22766600  |
| H | 1.26338100  | 3.23169800  | 3.60651900  |
| C | -6.09233700 | 2.93891300  | -1.50893700 |
| H | -6.56590800 | 2.07923700  | -2.00593300 |
| H | -6.60819900 | 3.05771500  | -0.54665100 |
| H | -6.29825400 | 3.82448300  | -2.11331700 |

|   |             |            |             |
|---|-------------|------------|-------------|
| C | 0.13111100  | 5.96879400 | 1.73151400  |
| H | -0.20915200 | 6.14781900 | 0.71024900  |
| H | -0.59464500 | 6.42630800 | 2.41705600  |
| H | 1.08118200  | 6.49712900 | 1.86426000  |
| C | -4.37644500 | 1.62271000 | -0.23390400 |
| H | -3.35940600 | 1.23060200 | -0.21072300 |
| H | -4.63178300 | 1.99111100 | 0.76934900  |
| H | -5.03979000 | 0.76587600 | -0.40666600 |

TS-EF-7RS-3

l imaginary frequency

H = -5472.482952

G = -5472.698314

E(M06-2X-DCM) = -5473.458643

|   |             |             |             |
|---|-------------|-------------|-------------|
| O | -0.63773400 | -2.43516600 | -1.46682400 |
| O | -2.71965400 | -1.33393500 | -0.35676400 |
| P | -1.08110200 | -1.27430200 | -0.39473800 |
| O | -0.68515000 | 0.10089500  | -0.83728400 |
| C | -1.85051300 | -1.86608800 | -5.43139500 |
| C | -2.70395100 | -2.44979600 | -4.50027600 |
| C | -2.25818000 | -2.71072400 | -3.19753200 |
| C | -0.08881400 | -1.73094900 | -3.73147800 |
| C | -0.54690800 | -1.54834300 | -5.04911100 |
| C | -3.36626400 | -2.52143500 | -0.00081200 |
| C | -3.48256400 | -3.54981900 | -0.93917000 |
| C | -3.96460300 | -4.80252200 | -0.52529200 |
| C | -4.42364900 | -4.99762700 | 0.77204800  |
| C | -4.43483200 | -3.91563300 | 1.65075500  |
| C | -3.91449800 | -2.66195900 | 1.29103300  |
| H | 0.14086100  | -1.13089100 | -5.77865200 |
| H | -4.84861900 | -4.03166400 | 2.64834600  |
| C | -3.27954500 | -3.55917400 | -2.45380700 |
| C | -4.58782600 | -3.13303200 | -3.20344500 |
| H | -4.95279500 | -2.19622200 | -2.76667300 |
| H | -5.38447600 | -3.87782900 | -3.11046200 |
| H | -4.89543000 | -6.01525500 | -2.06183700 |
| H | -3.47756300 | -6.76720600 | -1.33843300 |
| C | -0.99364100 | -2.28293600 | -2.80413800 |
| H | -2.18304800 | -1.67122800 | -6.44797300 |
| H | -4.79230400 | -5.96857900 | 1.09305900  |
| C | -4.14344100 | -2.88850900 | -4.66359600 |
| H | -4.75778300 | -2.13577500 | -5.17103700 |
| H | -4.21366400 | -3.80715300 | -5.26291900 |
| C | -3.89563700 | -5.80515900 | -1.65620100 |

|   |             |             |             |
|---|-------------|-------------|-------------|
| C | -3.00816100 | -5.08300800 | -2.69058200 |
| H | -1.95246800 | -5.28721400 | -2.47837400 |
| H | -3.20608100 | -5.38611900 | -3.72351000 |
| C | -4.09593400 | -1.52823100 | 2.25734300  |
| C | -3.31848200 | -1.43920300 | 3.43530100  |
| C | -5.18063100 | -0.63752400 | 2.05232800  |
| C | -2.24425700 | -2.34094900 | 3.71887800  |
| C | -3.60918400 | -0.40948700 | 4.40972400  |
| C | -5.47092700 | 0.37647700  | 3.04162900  |
| C | -1.50763200 | -2.23140100 | 4.86836800  |
| H | -1.99758500 | -3.10084400 | 2.98999000  |
| C | -2.81558200 | -0.33073000 | 5.59798100  |
| C | -4.67032300 | 0.47149400  | 4.18382200  |
| C | -1.79553500 | -1.21521800 | 5.82338200  |
| H | -0.68063300 | -2.91286700 | 5.04094400  |
| H | -3.05040500 | 0.44535200  | 6.32334700  |
| H | -4.89729700 | 1.23214200  | 4.92888400  |
| H | -1.19959000 | -1.14572100 | 6.72959800  |
| C | 1.32787200  | -1.38732200 | -3.39580800 |
| C | 1.78766700  | -0.05446000 | -3.54486600 |
| C | 2.23702900  | -2.41202400 | -3.02864200 |
| C | 0.91955600  | 1.03620700  | -3.87931700 |
| C | 3.18972500  | 0.24584700  | -3.35518700 |
| C | 3.62647400  | -2.08664700 | -2.79842800 |
| C | 1.40515600  | 2.30555600  | -4.06950200 |
| H | -0.14242200 | 0.84446600  | -3.97748000 |
| C | 3.65563800  | 1.58349600  | -3.56280800 |
| C | 4.06822600  | -0.77334300 | -2.97829100 |
| C | 2.79419500  | 2.58660900  | -3.91889200 |
| H | 0.72387500  | 3.10704100  | -4.34563800 |
| H | 4.71898200  | 1.77896000  | -3.44090600 |
| H | 5.11845800  | -0.53751900 | -2.82027900 |
| H | 3.16326700  | 3.59508800  | -4.08586000 |
| C | -7.12784100 | 0.11663900  | 0.77645200  |
| H | -7.77880400 | 0.01828700  | -0.08832200 |
| C | -6.05379400 | -0.72371100 | 0.91951900  |
| H | -5.86370500 | -1.48356200 | 0.17015000  |
| C | -7.40608000 | 1.11499200  | 1.75335100  |
| H | -8.26449500 | 1.76942600  | 1.62670600  |
| C | -6.59463200 | 1.24038300  | 2.84892100  |
| H | -6.79890100 | 1.99351100  | 3.60681100  |
| C | 2.75514800  | -4.74872200 | -2.53242200 |
| H | 2.43106300  | -5.78148600 | -2.43642700 |
| C | 4.11557100  | -4.41590400 | -2.27858500 |

|   |             |             |             |
|---|-------------|-------------|-------------|
| H | 4.81514700  | -5.19351700 | -1.98440800 |
| C | 4.53568900  | -3.12141200 | -2.41523200 |
| H | 5.57395800  | -2.85194300 | -2.23718100 |
| C | 1.85300400  | -3.78488800 | -2.89835500 |
| H | 0.82555600  | -4.06429000 | -3.09778300 |
| C | -1.11568100 | 4.08497900  | -0.26257400 |
| C | -1.27238300 | 4.14379500  | 1.31924400  |
| H | -1.08048100 | 5.17226900  | 1.61784900  |
| H | -2.32460000 | 3.94806700  | 1.55248900  |
| C | -0.47923400 | 3.21914000  | 2.20713500  |
| C | 0.33511100  | 3.69941500  | -0.65370700 |
| H | 1.02875900  | 4.48029100  | -0.34365200 |
| H | 0.39029600  | 3.61307700  | -1.74388000 |
| N | 0.84563100  | 2.42900500  | -0.12024200 |
| C | 2.10562800  | 2.27568300  | 0.33555800  |
| N | 2.65181200  | 1.05176400  | 0.31754500  |
| C | 3.98860700  | 0.74387300  | 0.72396500  |
| C | 4.21433300  | -0.09581600 | 1.81437600  |
| C | 5.05356400  | 1.20023600  | -0.05051500 |
| C | 5.52321800  | -0.47412000 | 2.12096700  |
| C | 6.35510800  | 0.81360800  | 0.26611300  |
| H | 4.85655700  | 1.82612400  | -0.91329600 |
| C | 6.59826900  | -0.02545600 | 1.35333200  |
| H | 7.60726700  | -0.34156000 | 1.58664000  |
| C | 7.47654300  | 1.30078900  | -0.61033200 |
| C | 5.75803900  | -1.36359300 | 3.31559300  |
| F | 7.19335500  | 1.09430300  | -1.92501400 |
| F | 8.64193600  | 0.67733100  | -0.34840900 |
| F | 7.68567100  | 2.62784100  | -0.47037600 |
| F | 5.67573200  | -0.66669900 | 4.47279500  |
| F | 6.98202000  | -1.93644400 | 3.28429400  |
| F | 4.84449900  | -2.35203000 | 3.38459000  |
| S | 2.94092500  | 3.60526100  | 1.09015600  |
| H | 3.37622800  | -0.46465800 | 2.39611900  |
| H | 2.10276600  | 0.22961500  | 0.03100900  |
| H | 0.36654000  | 1.57615700  | -0.45462500 |
| C | 0.56869800  | 3.70970100  | 3.01067700  |
| H | 1.54157200  | 3.65520000  | 2.09048500  |
| N | -0.60474700 | -1.83918200 | 1.04401400  |
| S | 0.91690300  | -1.90896300 | 1.45793200  |
| O | 1.18698200  | -1.23664400 | 2.74430600  |
| O | 1.87249200  | -1.61962400 | 0.35498800  |
| C | 1.18820600  | -3.72220600 | 1.80963100  |
| F | 0.36333500  | -4.14407100 | 2.78146500  |

|   |              |              |              |
|---|--------------|--------------|--------------|
| F | 2. 44996800  | -3. 90631300 | 2. 21099700  |
| F | 0. 96547900  | -4. 44686400 | 0. 71180900  |
| C | 1. 11981000  | 2. 83324100  | 4. 13815800  |
| H | 1. 25273400  | 1. 78868300  | 3. 84936100  |
| H | 2. 09229100  | 3. 21342300  | 4. 46475100  |
| H | 0. 44541000  | 2. 85658000  | 5. 00405500  |
| C | -0. 93941200 | 1. 79611400  | 2. 31823000  |
| H | -0. 13884100 | 1. 07958300  | 2. 51324000  |
| H | -1. 62369300 | 1. 72560300  | 3. 17959000  |
| H | -1. 48831800 | 1. 46264400  | 1. 43889000  |
| C | 0. 70243200  | 5. 21015400  | 3. 31799100  |
| H | 1. 68308000  | 5. 39978700  | 3. 76478400  |
| H | 0. 62280800  | 5. 84620100  | 2. 43401500  |
| H | -0. 05832300 | 5. 52579100  | 4. 04264100  |
| C | -1. 40161600 | 5. 50744500  | -0. 79849900 |
| C | -2. 49703000 | 6. 23748600  | -0. 30257700 |
| C | -0. 62793400 | 6. 11822300  | -1. 79876600 |
| C | -2. 80219800 | 7. 51219800  | -0. 77655500 |
| H | -3. 12994800 | 5. 80721900  | 0. 46582500  |
| C | -0. 92903700 | 7. 39685800  | -2. 27586800 |
| H | 0. 22956300  | 5. 61189600  | -2. 22653300 |
| C | -2. 01782700 | 8. 10186800  | -1. 76915800 |
| H | -3. 65643300 | 8. 04462200  | -0. 36639700 |
| H | -0. 30221000 | 7. 83792600  | -3. 04642400 |
| H | -2. 25152100 | 9. 09664100  | -2. 13845100 |
| C | -2. 09387200 | 3. 06694800  | -0. 96987900 |
| H | -1. 89327400 | 2. 06177100  | -0. 58731500 |
| H | -1. 77229500 | 3. 03615200  | -2. 01459700 |
| C | -3. 59157500 | 3. 31581500  | -0. 90249800 |
| C | -4. 29179800 | 3. 88378300  | -1. 90911100 |
| C | -4. 28517700 | 2. 82009700  | 0. 35795000  |
| H | -5. 20586400 | 2. 27364500  | 0. 13970700  |
| H | -3. 64885000 | 2. 12783000  | 0. 91500700  |
| H | -4. 55979200 | 3. 63495500  | 1. 04440400  |
| C | -5. 78634500 | 4. 11179600  | -1. 84155400 |
| H | -6. 01208900 | 5. 18151000  | -1. 95894500 |
| H | -6. 29520800 | 3. 59934100  | -2. 67047300 |
| H | -6. 24414500 | 3. 77866500  | -0. 90908400 |
| C | -3. 70638500 | 4. 38690100  | -3. 20857100 |
| H | -3. 81415800 | 5. 47813900  | -3. 27856500 |
| H | -2. 64856300 | 4. 15942000  | -3. 34366500 |
| H | -4. 25430700 | 3. 96236500  | -4. 06143800 |

l imaginary frequency

H = -5472.482952

G = -5472.698316

E(M06-2X-DCM) = -5473.458642

|   |             |             |             |
|---|-------------|-------------|-------------|
| O | -0.63778000 | -2.43513600 | -1.46684400 |
| O | -2.71969900 | -1.33392100 | -0.35676900 |
| P | -1.08114600 | -1.27430200 | -0.39472400 |
| O | -0.68518700 | 0.10091100  | -0.83721200 |
| C | -1.85056900 | -1.86600500 | -5.43140400 |
| C | -2.70400600 | -2.44972400 | -4.50029100 |
| C | -2.25823600 | -2.71066900 | -3.19755000 |
| C | -0.08886600 | -1.73089600 | -3.73148800 |
| C | -0.54696100 | -1.54827100 | -5.04911800 |
| C | -3.36632500 | -2.52141500 | -0.00083300 |
| C | -3.48262800 | -3.54978900 | -0.93920000 |
| C | -3.96467900 | -4.80249100 | -0.52533800 |
| C | -4.42373800 | -4.99760300 | 0.77199600  |
| C | -4.43492100 | -3.91561600 | 1.65071200  |
| C | -3.91457200 | -2.66194300 | 1.29100600  |
| H | 0.14080900  | -1.13081400 | -5.77865600 |
| H | -4.84871900 | -4.03165100 | 2.64829900  |
| C | -3.27960200 | -3.55912700 | -2.45383600 |
| C | -4.58788300 | -3.13297400 | -3.20347000 |
| H | -4.95285200 | -2.19616900 | -2.76668700 |
| H | -5.38453300 | -3.87777100 | -3.11049700 |
| H | -4.89550000 | -6.01520800 | -2.06190000 |
| H | -3.47763900 | -6.76716900 | -1.33849600 |
| C | -0.99369500 | -2.28288800 | -2.80415200 |
| H | -2.18310500 | -1.67113200 | -6.44797900 |
| H | -4.79240400 | -5.96855400 | 1.09299700  |
| C | -4.14349700 | -2.88843300 | -4.66361800 |
| H | -4.75783700 | -2.13569100 | -5.17104900 |
| H | -4.21372000 | -3.80706900 | -5.26295300 |
| C | -3.89570900 | -5.80511800 | -1.65625600 |
| C | -3.00822500 | -5.08296000 | -2.69062600 |
| H | -1.95253300 | -5.28717300 | -2.47841600 |
| H | -3.20614100 | -5.38606000 | -3.72355800 |
| C | -4.09600400 | -1.52821700 | 2.25732000  |
| C | -3.31856200 | -1.43920500 | 3.43528600  |
| C | -5.18068100 | -0.63748800 | 2.05229300  |
| C | -2.24435400 | -2.34096800 | 3.71887200  |
| C | -3.60925700 | -0.40948400 | 4.40970700  |
| C | -5.47096800 | 0.37651800  | 3.04159100  |
| C | -1.50773900 | -2.23143300 | 4.86836900  |

|   |             |             |             |
|---|-------------|-------------|-------------|
| H | -1.99768600 | -3.10086500 | 2.98998500  |
| C | -2.81566600 | -0.33074300 | 5.59797200  |
| C | -4.67037700 | 0.47151700  | 4.18379400  |
| C | -1.79563500 | -1.21524700 | 5.82338300  |
| H | -0.68075300 | -2.91291200 | 5.04095300  |
| H | -3.05048300 | 0.44534300  | 6.32333700  |
| H | -4.89734400 | 1.23216800  | 4.92885400  |
| H | -1.19969900 | -1.14576200 | 6.72960500  |
| C | 1.32782400  | -1.38729000 | -3.39581800 |
| C | 1.78763600  | -0.05443100 | -3.54486000 |
| C | 2.23697000  | -2.41200800 | -3.02866900 |
| C | 0.91953700  | 1.03625000  | -3.87929500 |
| C | 3.18969800  | 0.24585500  | -3.35518300 |
| C | 3.62642000  | -2.08665200 | -2.79845800 |
| C | 1.40515200  | 2.30559600  | -4.06946600 |
| H | -0.14244300 | 0.84452300  | -3.97746000 |
| C | 3.65562600  | 1.58350100  | -3.56278700 |
| C | 4.06818800  | -0.77335100 | -2.97830500 |
| C | 2.79419500  | 2.58663000  | -3.91885600 |
| H | 0.72388000  | 3.10709200  | -4.34559100 |
| H | 4.71897400  | 1.77895100  | -3.44088700 |
| H | 5.11842400  | -0.53754200 | -2.82029500 |
| H | 3.16327900  | 3.59510600  | -4.08581200 |
| C | -7.12785600 | 0.11672200  | 0.77639000  |
| H | -7.77880800 | 0.01838600  | -0.08839400 |
| C | -6.05383000 | -0.72365400 | 0.91947100  |
| H | -5.86374900 | -1.48350800 | 0.17010400  |
| C | -7.40608600 | 1.11507900  | 1.75328700  |
| H | -8.26448500 | 1.76953300  | 1.62663000  |
| C | -6.59465200 | 1.24044800  | 2.84887000  |
| H | -6.79891500 | 1.99357900  | 3.60675800  |
| C | 2.75506300  | -4.74872000 | -2.53248600 |
| H | 2.43096600  | -5.78148100 | -2.43650500 |
| C | 4.11549100  | -4.41592100 | -2.27865000 |
| H | 4.81505900  | -5.19354800 | -1.98448600 |
| C | 4.53562400  | -3.12143300 | -2.41528000 |
| H | 5.57389700  | -2.85197900 | -2.23722900 |
| C | 1.85293000  | -3.78486900 | -2.89840200 |
| H | 0.82547700  | -4.06425600 | -3.09783000 |
| C | -1.11558500 | 4.08501400  | -0.26253000 |
| C | -1.27226500 | 4.14392000  | 1.31929000  |
| H | -1.08036000 | 5.17241000  | 1.61783500  |
| H | -2.32448000 | 3.94820500  | 1.55255900  |
| C | -0.47910600 | 3.21931200  | 2.20721900  |



|   |             |             |             |
|---|-------------|-------------|-------------|
| C | 0.33519500  | 3.69940700  | -0.65366600 |
| H | 1.02886200  | 4.48027100  | -0.34362000 |
| H | 0.39037400  | 3.61306400  | -1.74383800 |
| N | 0.84569400  | 2.42898900  | -0.12020300 |
| C | 2.10569500  | 2.27564400  | 0.33557800  |
| N | 2.65184600  | 1.05170900  | 0.31757100  |
| C | 3.98863700  | 0.74377900  | 0.72397000  |
| C | 4.21434800  | -0.09594500 | 1.81435800  |
| C | 5.05360100  | 1.20013400  | -0.05050400 |
| C | 5.52322500  | -0.47429500 | 2.12092800  |
| C | 6.35513600  | 0.81346400  | 0.26610500  |
| H | 4.85660600  | 1.82605100  | -0.91326800 |
| C | 6.59828300  | -0.02563800 | 1.35329900  |
| H | 7.60727300  | -0.34177800 | 1.58658800  |
| C | 7.47657600  | 1.30063600  | -0.61033800 |
| C | 5.75802900  | -1.36379500 | 3.31553800  |
| F | 7.19338900  | 1.09415500  | -1.92502000 |
| F | 8.64196500  | 0.67716900  | -0.34841500 |
| F | 7.68571400  | 2.62768600  | -0.47037900 |
| F | 5.67585500  | -0.66689900 | 4.47274900  |
| F | 6.98195400  | -1.93676300 | 3.28416800  |
| F | 4.84439800  | -2.35214400 | 3.38458200  |
| S | 2.94104700  | 3.60521400  | 1.09012800  |
| H | 3.37623700  | -0.46477800 | 2.39609700  |
| H | 2.10277500  | 0.22957500  | 0.03104200  |
| H | 0.36657600  | 1.57615500  | -0.45458000 |
| C | 0.56887500  | 3.70990800  | 3.01067500  |
| H | 1.54169900  | 3.65528800  | 2.09046900  |
| N | -0.60480300 | -1.83924500 | 1.04400800  |
| S | 0.91684300  | -1.90898100 | 1.45794800  |
| O | 1.18690800  | -1.23661500 | 2.74430000  |
| O | 1.87243800  | -1.61966700 | 0.35500400  |
| C | 1.18816400  | -3.72220800 | 1.80971300  |
| F | 0.36327400  | -4.14405800 | 2.78153700  |
| F | 2.44991800  | -3.90627900 | 2.21112000  |
| F | 0.96548200  | -4.44690500 | 0.71190800  |
| C | 1.12000400  | 2.83354200  | 4.13822300  |
| H | 1.25280500  | 1.78893400  | 3.84955500  |
| H | 2.09254800  | 3.21367800  | 4.46468200  |
| H | 0.44567800  | 2.85706300  | 5.00417400  |
| C | -0.93931000 | 1.79630400  | 2.31842100  |
| H | -0.13875700 | 1.07977300  | 2.51350200  |
| H | -1.62361200 | 1.72587700  | 3.17977000  |
| H | -1.48820400 | 1.46277700  | 1.43909400  |

|   |             |            |             |
|---|-------------|------------|-------------|
| C | 0.70266200  | 5.21038300 | 3.31786000  |
| H | 1.68335000  | 5.40003200 | 3.76455900  |
| H | 0.62297900  | 5.84636300 | 2.43384100  |
| H | -0.05802900 | 5.52608900 | 4.04254800  |
| C | -1.40150300 | 5.50746100 | -0.79851500 |
| C | -2.49692900 | 6.23751800 | -0.30264200 |
| C | -0.62779400 | 6.11820900 | -1.79878000 |
| C | -2.80208500 | 7.51221600 | -0.77666600 |
| H | -3.12986400 | 5.80727600 | 0.46576000  |
| C | -0.92888700 | 7.39683000 | -2.27592900 |
| H | 0.22971500  | 5.61187200 | -2.22650800 |
| C | -2.01769000 | 8.10185500 | -1.76926800 |
| H | -3.65632900 | 8.04465400 | -0.36654400 |
| H | -0.30204000 | 7.83787500 | -3.04648200 |
| H | -2.25137500 | 9.09661600 | -2.13859800 |
| C | -2.09379900 | 3.06696100 | -0.96977100 |
| H | -1.89320700 | 2.06179900 | -0.58716400 |
| H | -1.77224100 | 3.03611200 | -2.01449200 |
| C | -3.59150100 | 3.31583900 | -0.90237600 |
| C | -4.29173900 | 3.88375500 | -1.90900900 |
| C | -4.28507700 | 2.82019000 | 0.35811500  |
| H | -5.20569000 | 2.27359700 | 0.13991100  |
| H | -3.64868600 | 2.12806800 | 0.91527700  |
| H | -4.55981500 | 3.63510100 | 1.04445600  |
| C | -5.78628000 | 4.11179000 | -1.84143900 |
| H | -6.01196600 | 5.18160200 | -1.95808500 |
| H | -6.29507600 | 3.59995800 | -2.67077900 |
| H | -6.24419200 | 3.77801300 | -0.90925600 |
| C | -3.70633300 | 4.38685000 | -3.20848100 |
| H | -3.81436100 | 5.47805500 | -3.27861200 |
| H | -2.64844400 | 4.15961400 | -3.34345300 |
| H | -4.25408000 | 3.96208500 | -4.06134600 |

TS-EF-7RR

l imaginary frequency

H = -5472.485856

G = -5472.701308

E(M06-2X-DCM) = -5473.463093

|   |             |             |             |
|---|-------------|-------------|-------------|
| O | -1.07280800 | -2.18585400 | -1.61054700 |
| O | -2.92277900 | -0.75883100 | -0.47118400 |
| P | -1.30344600 | -1.02519000 | -0.46947200 |
| O | -0.61557500 | 0.25594900  | -0.82398300 |
| C | -2.07632600 | -1.15430900 | -5.54109500 |
| C | -3.04088100 | -1.63107900 | -4.65850500 |

|   |             |             |             |
|---|-------------|-------------|-------------|
| C | -2.67834300 | -2.04607400 | -3.36973000 |
| C | -0.35775700 | -1.44025600 | -3.81561900 |
| C | -0.74627500 | -1.09718500 | -5.12351400 |
| C | -3.79819100 | -1.81047700 | -0.18626100 |
| C | -4.08610900 | -2.75325600 | -1.17633000 |
| C | -4.80646200 | -3.90926400 | -0.83418700 |
| C | -5.32775200 | -4.07223600 | 0.44393200  |
| C | -5.15711300 | -3.04834400 | 1.37442800  |
| C | -4.39839800 | -1.90207500 | 1.08713300  |
| H | 0.02079800  | -0.76256300 | -5.81577100 |
| H | -5.61183200 | -3.12849700 | 2.35764300  |
| C | -3.85392800 | -2.72931600 | -2.68646300 |
| C | -5.04558800 | -2.03243600 | -3.42851000 |
| H | -5.24470800 | -1.06941200 | -2.94383100 |
| H | -5.96631300 | -2.62277600 | -3.38769100 |
| H | -5.90780100 | -4.85560500 | -2.44426400 |
| H | -4.67227000 | -5.89066200 | -1.73658900 |
| C | -1.36554500 | -1.88229900 | -2.93619400 |
| H | -2.34570400 | -0.84257900 | -6.54722500 |
| H | -5.88133100 | -4.96896800 | 0.71064300  |
| C | -4.53116200 | -1.79558000 | -4.86639000 |
| H | -4.99059200 | -0.92093900 | -5.34137300 |
| H | -4.74870700 | -2.65530200 | -5.51567200 |
| C | -4.89682400 | -4.85402600 | -2.01272300 |
| C | -3.86502700 | -4.26370000 | -2.99628500 |
| H | -2.87128800 | -4.67146200 | -2.77878700 |
| H | -4.09130800 | -4.47595700 | -4.04602000 |
| C | -4.38672900 | -0.79994300 | 2.10568800  |
| C | -3.64318400 | -0.91819800 | 3.30294500  |
| C | -5.27270800 | 0.29272500  | 1.92422400  |
| C | -2.77315300 | -2.02422500 | 3.56292800  |
| C | -3.75989800 | 0.10187100  | 4.32279500  |
| C | -5.38423800 | 1.30248100  | 2.95278300  |
| C | -2.06767700 | -2.11503300 | 4.73336300  |
| H | -2.65288200 | -2.78130700 | 2.79999300  |
| C | -3.00753200 | -0.03301700 | 5.53247200  |
| C | -4.61705800 | 1.18652700  | 4.11591500  |
| C | -2.18621800 | -1.10942700 | 5.73464000  |
| H | -1.39323200 | -2.95125800 | 4.88793000  |
| H | -3.11245600 | 0.73814100  | 6.29276700  |
| H | -4.71474500 | 1.94246200  | 4.89340300  |
| H | -1.62019800 | -1.20171400 | 6.65789000  |
| C | 1.08783600  | -1.36431900 | -3.43896000 |
| C | 1.76599700  | -0.12024300 | -3.48303700 |

|   |              |              |              |
|---|--------------|--------------|--------------|
| C | 1. 80279200  | -2. 54939100 | -3. 13064100 |
| C | 1. 10174400  | 1. 12144300  | -3. 75213100 |
| C | 3. 19117500  | -0. 07208300 | -3. 24286400 |
| C | 3. 21916700  | -2. 47783900 | -2. 85182300 |
| C | 1. 79297500  | 2. 30446900  | -3. 82578500 |
| H | 0. 02791300  | 1. 11513000  | -3. 89726900 |
| C | 3. 87718900  | 1. 18119400  | -3. 33699100 |
| C | 3. 87702100  | -1. 24732800 | -2. 92507900 |
| C | 3. 20351700  | 2. 33804500  | -3. 62518000 |
| H | 1. 26128200  | 3. 22718000  | -4. 04539700 |
| H | 4. 95370200  | 1. 18688700  | -3. 18035500 |
| H | 4. 94547100  | -1. 20101100 | -2. 72631500 |
| H | 3. 73845600  | 3. 28101500  | -3. 70337700 |
| C | -7. 01629200 | 1. 45445200  | 0. 66072200  |
| H | -7. 66350000 | 1. 51241700  | -0. 21076500 |
| C | -6. 12495000 | 0. 41967700  | 0. 77968400  |
| H | -6. 07163300 | -0. 33483200 | 0. 00322300  |
| C | -7. 11162900 | 2. 45267300  | 1. 67159700  |
| H | -7. 82722800 | 3. 26377500  | 1. 56361400  |
| C | -6. 31119200 | 2. 37772900  | 2. 77988100  |
| H | -6. 38105600 | 3. 12654400  | 3. 56591500  |
| C | 1. 91042900  | -4. 96812600 | -2. 79638300 |
| H | 1. 41673200  | -5. 93606600 | -2. 78131000 |
| C | 3. 29912400  | -4. 88634400 | -2. 49500000 |
| H | 3. 85083000  | -5. 78865200 | -2. 24582800 |
| C | 3. 93216200  | -3. 67428900 | -2. 52891200 |
| H | 4. 99487100  | -3. 59568800 | -2. 31266700 |
| C | 1. 19194800  | -3. 84379300 | -3. 10692400 |
| H | 0. 13841600  | -3. 93202600 | -3. 34351200 |
| C | -0. 49063700 | 4. 45158500  | 0. 26472700  |
| C | -0. 43197600 | 4. 45960300  | 1. 83771900  |
| H | 0. 30978800  | 5. 20707400  | 2. 11987500  |
| H | -1. 39263300 | 4. 83834300  | 2. 21160600  |
| C | -0. 15389200 | 3. 17762700  | 2. 57915500  |
| C | 0. 77187700  | 3. 75592400  | -0. 30104800 |
| H | 1. 63985300  | 4. 34426100  | -0. 00822000 |
| H | 0. 73170400  | 3. 76517600  | -1. 39358900 |
| N | 1. 05064400  | 2. 37254500  | 0. 11894200  |
| C | 2. 24394500  | 1. 97084900  | 0. 59602300  |
| N | 2. 59238500  | 0. 68197200  | 0. 47027000  |
| C | 3. 85475900  | 0. 13678100  | 0. 87308200  |
| C | 3. 92727500  | -0. 78672700 | 1. 91531600  |
| C | 4. 99291200  | 0. 46752700  | 0. 14067100  |
| C | 5. 15642100  | -1. 37787700 | 2. 21474600  |

|   |             |             |             |
|---|-------------|-------------|-------------|
| C | 6.21368400  | -0.13209700 | 0.44869100  |
| H | 4.91204100  | 1.16774100  | -0.68289300 |
| C | 6.30315200  | -1.05829300 | 1.48720800  |
| H | 7.24719700  | -1.53713200 | 1.71485700  |
| C | 7.41246300  | 0.22381400  | -0.38694600 |
| C | 5.22708400  | -2.35734700 | 3.35874500  |
| F | 7.14958600  | 0.06438800  | -1.71330500 |
| F | 8.48645600  | -0.53656600 | -0.09866500 |
| F | 7.77286600  | 1.51565700  | -0.22560200 |
| F | 5.21308400  | -1.72146200 | 4.55361700  |
| F | 6.35658600  | -3.09920200 | 3.31829900  |
| F | 4.17960400  | -3.20506300 | 3.35123400  |
| S | 3.24322500  | 3.06170000  | 1.52447500  |
| H | 3.03171200  | -1.05502900 | 2.46494800  |
| H | 1.93898300  | -0.00321600 | 0.07197500  |
| H | 0.44680300  | 1.63433500  | -0.28059500 |
| C | 0.90102500  | 3.10868100  | 3.50579300  |
| H | 1.88197700  | 3.10553600  | 2.55755600  |
| N | -0.99952300 | -1.75954600 | 0.93752400  |
| S | 0.47128700  | -2.09963700 | 1.40356500  |
| O | 0.78399000  | -1.54323700 | 2.73541700  |
| O | 1.51003300  | -1.92138600 | 0.35683000  |
| C | 0.41449200  | -3.94569900 | 1.67395800  |
| F | -0.51649100 | -4.26164500 | 2.58875100  |
| F | 1.60585500  | -4.36046500 | 2.11687600  |
| F | 0.12704600  | -4.57482400 | 0.53289900  |
| C | -1.82142300 | 3.90791000  | -0.28354600 |
| C | -1.88612200 | 3.00929900  | -1.35570100 |
| C | -3.03985200 | 4.38415600  | 0.23441000  |
| C | -3.11199800 | 2.59540800  | -1.88358400 |
| H | -0.98722100 | 2.59286000  | -1.79069700 |
| C | -4.26358600 | 3.98059100  | -0.29207700 |
| H | -3.04565600 | 5.09333900  | 1.05827400  |
| C | -4.30567400 | 3.08093700  | -1.35881400 |
| H | -3.12076600 | 1.87496900  | -2.69629900 |
| H | -5.18507500 | 4.35612800  | 0.14232300  |
| H | -5.25968300 | 2.75160400  | -1.75907400 |
| C | -0.36162200 | 5.97891700  | -0.14673600 |
| H | -1.21000000 | 6.50079300  | 0.31367400  |
| H | 0.53510800  | 6.36596300  | 0.34630400  |
| C | -0.33091200 | 6.32411200  | -1.62969700 |
| C | 0.81387100  | 6.59452300  | -2.29751000 |
| C | 0.84341400  | 6.92814600  | -3.77522500 |
| H | 1.08678600  | 7.98913900  | -3.93335300 |

|   |             |            |             |
|---|-------------|------------|-------------|
| H | 1.63629700  | 6.35596400 | -4.27577900 |
| H | -0.09153800 | 6.71530800 | -4.29534700 |
| C | 1.10430900  | 1.83286900 | 4.32256200  |
| H | 1.07168500  | 0.91971300 | 3.72368300  |
| H | 2.07561000  | 1.86601400 | 4.82566400  |
| H | 0.33243300  | 1.74142800 | 5.09765500  |
| C | -1.68993700 | 6.41759800 | -2.30850600 |
| H | -1.98348600 | 5.47878700 | -2.79349000 |
| H | -2.47153500 | 6.63943200 | -1.57588100 |
| H | -1.71932200 | 7.20719900 | -3.06440500 |
| C | -1.07072200 | 2.01328700 | 2.35885700  |
| H | -0.58715900 | 1.04457100 | 2.49647000  |
| H | -1.86181900 | 2.06710600 | 3.12493100  |
| H | -1.56293800 | 2.03032600 | 1.38778200  |
| C | 1.41493500  | 4.34648800 | 4.25717600  |
| H | 2.45604300  | 4.18862900 | 4.55659000  |
| H | 1.37247100  | 5.27563400 | 3.68738500  |
| H | 0.82514400  | 4.48230300 | 5.17238300  |
| C | 2.20201500  | 6.61535900 | -1.69422700 |
| H | 2.22324600  | 6.60767100 | -0.60282600 |
| H | 2.79628100  | 5.75729700 | -2.03951600 |
| H | 2.73942800  | 7.51365300 | -2.02691000 |

TS-EF-7RR-1

1 imaginary frequency

H = -5472.484135

G = -5472.698775

E(M06-2X-DCM) = -5473.462559

|   |             |             |             |
|---|-------------|-------------|-------------|
| O | -0.83060400 | -2.21409000 | -1.60656200 |
| O | -2.79223700 | -0.99655400 | -0.40828300 |
| P | -1.15430000 | -1.09185800 | -0.44937800 |
| O | -0.61065000 | 0.25614900  | -0.80287400 |
| C | -2.00091200 | -1.24686800 | -5.50638500 |
| C | -2.89916500 | -1.82074900 | -4.61161500 |
| C | -2.47335300 | -2.21312200 | -3.33539600 |
| C | -0.22886100 | -1.38889100 | -3.81716100 |
| C | -0.67345200 | -1.07140300 | -5.11370600 |
| C | -3.54897500 | -2.13670800 | -0.12594200 |
| C | -3.76002500 | -3.08841700 | -1.12735700 |
| C | -4.35327800 | -4.31672300 | -0.79291700 |
| C | -4.82871800 | -4.55315700 | 0.49150800  |
| C | -4.74475800 | -3.53203600 | 1.43654300  |
| C | -4.11351500 | -2.30944000 | 1.15564200  |
| H | 0.04557500  | -0.66199400 | -5.81726900 |

|   |             |             |             |
|---|-------------|-------------|-------------|
| H | -5.17017900 | -3.67324400 | 2.42600300  |
| C | -3.56278600 | -3.01683300 | -2.64113500 |
| C | -4.83102500 | -2.42825600 | -3.34890800 |
| H | -5.11137100 | -1.49560900 | -2.84543900 |
| H | -5.68973200 | -3.10517600 | -3.29985700 |
| H | -5.39014200 | -5.34086100 | -2.39771400 |
| H | -4.04297600 | -6.25970400 | -1.73465500 |
| C | -1.17436800 | -1.92945600 | -2.92372000 |
| H | -2.31777200 | -0.95194800 | -6.50373900 |
| H | -5.28284900 | -5.50584200 | 0.75200400  |
| C | -4.37132200 | -2.12331300 | -4.79276400 |
| H | -4.92139100 | -1.28950800 | -5.24435900 |
| H | -4.52035100 | -2.99033900 | -5.45159000 |
| C | -4.37504600 | -5.24604700 | -1.98672100 |
| C | -3.42883600 | -4.53957500 | -2.97918100 |
| H | -2.39506400 | -4.84995700 | -2.78921200 |
| H | -3.65539300 | -4.75566900 | -4.02804400 |
| C | -4.20447400 | -1.22758500 | 2.19229600  |
| C | -3.42022000 | -1.27067600 | 3.36819600  |
| C | -5.22260700 | -0.24987900 | 2.05298100  |
| C | -2.42006900 | -2.26982300 | 3.58980100  |
| C | -3.62957800 | -0.28410500 | 4.40615100  |
| C | -5.42880000 | 0.72388100  | 3.10143200  |
| C | -1.67629500 | -2.28958500 | 4.73972000  |
| H | -2.23472200 | -3.00034400 | 2.81423400  |
| C | -2.83187400 | -0.34153600 | 5.59283000  |
| C | -4.61848400 | 0.68974900  | 4.24030100  |
| C | -1.88344000 | -1.31505700 | 5.75725000  |
| H | -0.90510000 | -3.04292500 | 4.86498900  |
| H | -3.00613600 | 0.40282700  | 6.36694900  |
| H | -4.78505200 | 1.41826100  | 5.03208500  |
| H | -1.28472900 | -1.34984400 | 6.66370300  |
| C | 1.21103400  | -1.18638200 | -3.46647000 |
| C | 1.77549100  | 0.11312500  | -3.51452700 |
| C | 2.03421300  | -2.30477000 | -3.17923200 |
| C | 0.99954100  | 1.29150300  | -3.76838600 |
| C | 3.19469800  | 0.28689500  | -3.29839600 |
| C | 3.44319200  | -2.10871000 | -2.92362400 |
| C | 1.58295600  | 2.53060400  | -3.85269800 |
| H | -0.07192100 | 1.19010600  | -3.89399800 |
| C | 3.76539500  | 1.59623700  | -3.39914500 |
| C | 3.98762000  | -0.82408000 | -2.99927500 |
| C | 2.98794700  | 2.68928500  | -3.67455100 |
| H | 0.96859200  | 3.40173000  | -4.06825900 |

|   |              |              |              |
|---|--------------|--------------|--------------|
| H | 4. 83958700  | 1. 69689900  | -3. 25978500 |
| H | 5. 05115800  | -0. 68383400 | -2. 81903500 |
| H | 3. 43553400  | 3. 67603900  | -3. 75838900 |
| C | -7. 13397800 | 0. 70170300  | 0. 85729900  |
| H | -7. 80752500 | 0. 69123900  | 0. 00416600  |
| C | -6. 11593900 | -0. 21352400 | 0. 93333300  |
| H | -5. 98957500 | -0. 94302900 | 0. 14157100  |
| C | -7. 32584900 | 1. 66396000  | 1. 88960400  |
| H | -8. 14133600 | 2. 37891900  | 1. 81646700  |
| C | -6. 48908000 | 1. 67539300  | 2. 97371800  |
| H | -6. 63023200 | 2. 39745100  | 3. 77509400  |
| C | 2. 36336400  | -4. 70632700 | -2. 86595000 |
| H | 1. 95845000  | -5. 71462800 | -2. 85053900 |
| C | 3. 74412600  | -4. 50258500 | -2. 58683900 |
| H | 4. 37845800  | -5. 35346500 | -2. 35392400 |
| C | 4. 26563400  | -3. 23856400 | -2. 62179100 |
| H | 5. 32068000  | -3. 06659100 | -2. 42282800 |
| C | 1. 54209300  | -3. 64878600 | -3. 15558500 |
| H | 0. 49687600  | -3. 82960700 | -3. 37570800 |
| C | -0. 84542400 | 4. 34766300  | 0. 35419900  |
| C | -0. 75129800 | 4. 34034800  | 1. 92358900  |
| H | -0. 07917800 | 5. 15522300  | 2. 19283900  |
| H | -1. 72957400 | 4. 62354500  | 2. 33395700  |
| C | -0. 31961300 | 3. 08765500  | 2. 64380700  |
| C | 0. 49294200  | 3. 83195500  | -0. 22601600 |
| H | 1. 28818200  | 4. 50477700  | 0. 09345100  |
| H | 0. 46180900  | 3. 86442600  | -1. 31727800 |
| N | 0. 91558000  | 2. 47326800  | 0. 14987700  |
| C | 2. 15071900  | 2. 17865900  | 0. 59655900  |
| N | 2. 62121100  | 0. 93420500  | 0. 42978800  |
| C | 3. 93848000  | 0. 50402500  | 0. 79323600  |
| C | 4. 12184100  | -0. 43793700 | 1. 80519600  |
| C | 5. 02336400  | 0. 96345700  | 0. 04962000  |
| C | 5. 40788000  | -0. 91718600 | 2. 06207200  |
| C | 6. 30212500  | 0. 47410300  | 0. 31470500  |
| H | 4. 85847900  | 1. 67621300  | -0. 75040700 |
| C | 6. 50245900  | -0. 46908200 | 1. 32174500  |
| H | 7. 49258200  | -0. 86219100 | 1. 51544100  |
| C | 7. 43986600  | 0. 96070900  | -0. 54009200 |
| C | 5. 59938200  | -1. 91525700 | 3. 17580900  |
| F | 7. 17590400  | 0. 76687000  | -1. 86176400 |
| F | 8. 59772600  | 0. 32864200  | -0. 26761200 |
| F | 7. 65235200  | 2. 28587200  | -0. 38753000 |
| F | 5. 58491800  | -1. 31128100 | 4. 38710200  |



|   |             |             |             |
|---|-------------|-------------|-------------|
| F | 6.78053800  | -2.56491800 | 3.07201500  |
| F | 4.62132200  | -2.84206300 | 3.18550400  |
| S | 3.05523700  | 3.33898800  | 1.53838800  |
| H | 3.26841100  | -0.80545800 | 2.36426200  |
| H | 2.02744500  | 0.19636500  | 0.03176300  |
| H | 0.37281000  | 1.69404500  | -0.26163000 |
| C | 0.75074900  | 3.12908900  | 3.55419500  |
| H | 1.71468400  | 3.23524200  | 2.58944600  |
| N | -0.74218500 | -1.80565500 | 0.94198100  |
| S | 0.76516200  | -2.02485600 | 1.35758500  |
| O | 1.06990800  | -1.46683900 | 2.69092300  |
| O | 1.75341900  | -1.73947900 | 0.28544500  |
| C | 0.87902100  | -3.87277900 | 1.59488200  |
| F | 0.01100100  | -4.28233900 | 2.53441000  |
| F | 2.11634500  | -4.18899000 | 1.99063500  |
| F | 0.60758600  | -4.50726600 | 0.45292100  |
| C | -2.09090400 | 3.63559100  | -0.20123600 |
| C | -2.06830100 | 2.93894500  | -1.41691400 |
| C | -3.33392300 | 3.75822600  | 0.44520900  |
| C | -3.22895400 | 2.38339600  | -1.95952900 |
| H | -1.14085800 | 2.79279700  | -1.95630400 |
| C | -4.49429600 | 3.20461500  | -0.08867600 |
| H | -3.41535200 | 4.29578800  | 1.38567000  |
| C | -4.44781600 | 2.51311400  | -1.29997100 |
| H | -3.16570800 | 1.83003300  | -2.89233900 |
| H | -5.43084200 | 3.29963000  | 0.45139700  |
| H | -5.34931900 | 2.06712900  | -1.70978500 |
| C | -0.95571500 | 5.88769900  | -0.03182000 |
| H | -1.89671900 | 6.24240100  | 0.39819000  |
| H | -0.15613500 | 6.41189800  | 0.50939800  |
| C | -0.85494000 | 6.27953300  | -1.49830000 |
| C | -1.92699700 | 6.50393600  | -2.28902600 |
| C | -1.79300200 | 6.89517300  | -3.74523000 |
| H | -2.44833100 | 6.26904100  | -4.36547300 |
| H | -2.12193100 | 7.93294300  | -3.90194200 |
| H | -0.77906100 | 6.80166600  | -4.13787100 |
| C | 1.10641500  | 1.87699500  | 4.35575000  |
| H | 1.17760400  | 0.97357400  | 3.74555100  |
| H | 2.06983900  | 2.01811400  | 4.85520900  |
| H | 0.35439100  | 1.68676700  | 5.13233600  |
| C | 0.56165600  | 6.49353700  | -2.02552300 |
| H | 0.65530800  | 7.44269600  | -2.56399700 |
| H | 1.28858800  | 6.52164000  | -1.20817200 |
| H | 0.89048900  | 5.70369200  | -2.71454300 |

|   |             |            |             |
|---|-------------|------------|-------------|
| C | -1.09961300 | 1.82763500 | 2.42439900  |
| H | -0.50918600 | 0.91984900 | 2.55931200  |
| H | -1.88917300 | 1.79111800 | 3.19331100  |
| H | -1.59389300 | 1.78946700 | 1.45530900  |
| C | 1.13895700  | 4.41011500 | 4.30795000  |
| H | 2.19665600  | 4.36667300 | 4.58716500  |
| H | 0.98277600  | 5.33371400 | 3.74906200  |
| H | 0.55549900  | 4.47229500 | 5.23515500  |
| C | -3.37094600 | 6.41141600 | -1.85629300 |
| H | -3.51019800 | 6.36698500 | -0.77557900 |
| H | -3.92997700 | 7.27802900 | -2.23507300 |
| H | -3.84754800 | 5.51703100 | -2.27862200 |

TS-EF-7RR-2

l imaginary frequency

H = -5472.484096

G = -5472.698681

E(M06-2X-DCM) = -5473.462225

|   |             |             |             |
|---|-------------|-------------|-------------|
| O | -0.52782200 | -2.78126000 | -0.85023900 |
| O | -2.65611300 | -1.43133400 | -0.19876100 |
| P | -1.01670800 | -1.35356000 | -0.19667200 |
| O | -0.60015400 | -0.17946600 | -1.02389900 |
| C | -1.58574800 | -3.42661900 | -4.84708200 |
| C | -2.47018200 | -3.72710500 | -3.81553600 |
| C | -2.07327100 | -3.58342800 | -2.47940900 |
| C | 0.10714200  | -2.76350700 | -3.20133300 |
| C | -0.30065700 | -2.98519400 | -4.52951200 |
| C | -3.30732000 | -2.46919800 | 0.47183900  |
| C | -3.37729600 | -3.73432600 | -0.11805600 |
| C | -3.86496200 | -4.81604400 | 0.63365100  |
| C | -4.37519100 | -4.62477900 | 1.91219500  |
| C | -4.43462400 | -3.32962600 | 2.42388300  |
| C | -3.91243700 | -2.22997000 | 1.72407900  |
| H | 0.41180300  | -2.78762700 | -5.32512800 |
| H | -4.89047500 | -3.15033600 | 3.39345500  |
| C | -3.11535500 | -4.19162000 | -1.55270100 |
| C | -4.39689900 | -4.03363900 | -2.44038900 |
| H | -4.78609900 | -3.01655900 | -2.31435300 |
| H | -5.19048500 | -4.73262800 | -2.15806800 |
| H | -4.72351500 | -6.45146500 | -0.50058800 |
| H | -3.32797400 | -6.92343100 | 0.46311900  |
| C | -0.82843700 | -3.03574900 | -2.18418300 |
| H | -1.87900400 | -3.54741500 | -5.88705300 |
| H | -4.74712300 | -5.46306100 | 2.49584000  |

|   |             |             |             |
|---|-------------|-------------|-------------|
| C | -3.89792100 | -4.22469200 | -3.89094800 |
| H | -4.49976300 | -3.67106000 | -4.62105300 |
| H | -3.93519400 | -5.28135300 | -4.19110300 |
| C | -3.74230800 | -6.10909500 | -0.14227400 |
| C | -2.82192800 | -5.71093000 | -1.31405500 |
| H | -1.77350700 | -5.82123600 | -1.01440900 |
| H | -2.97698100 | -6.31231500 | -2.21538400 |
| C | -4.15721000 | -0.86348500 | 2.29481200  |
| C | -3.41887500 | -0.38650200 | 3.40218400  |
| C | -5.26466500 | -0.12334800 | 1.80779000  |
| C | -2.33551400 | -1.12245500 | 3.97825400  |
| C | -3.76441100 | 0.88523300  | 4.00041800  |
| C | -5.60656300 | 1.14069100  | 2.42047600  |
| C | -1.63782200 | -0.63828500 | 5.05272500  |
| H | -2.05176400 | -2.06489600 | 3.53046200  |
| C | -3.00998100 | 1.35472000  | 5.12220900  |
| C | -4.83860600 | 1.61771200  | 3.48717400  |
| C | -1.97747500 | 0.61620700  | 5.63504300  |
| H | -0.80236200 | -1.20716300 | 5.44812000  |
| H | -3.28571900 | 2.30948200  | 5.56503400  |
| H | -5.10590000 | 2.56556000  | 3.95139400  |
| H | -1.41311000 | 0.98186300  | 6.48894400  |
| C | 1.50610700  | -2.30705700 | -2.93246600 |
| C | 1.95759700  | -1.06560600 | -3.44695100 |
| C | 2.41008500  | -3.16020400 | -2.24968200 |
| C | 1.09259500  | -0.13899100 | -4.11634600 |
| C | 3.34674000  | -0.69107600 | -3.30083600 |
| C | 3.78534300  | -2.75135100 | -2.07429400 |
| C | 1.56977400  | 1.03447700  | -4.64380200 |
| H | 0.03889100  | -0.37849800 | -4.19573700 |
| C | 3.80511700  | 0.54113900  | -3.86802400 |
| C | 4.21992600  | -1.53717800 | -2.61227100 |
| C | 2.94737300  | 1.38032900  | -4.52756100 |
| H | 0.89250600  | 1.70689500  | -5.16543100 |
| H | 4.85989600  | 0.78842700  | -3.76834900 |
| H | 5.25971400  | -1.24147100 | -2.49039700 |
| H | 3.31053100  | 2.30766600  | -4.96249200 |
| C | -7.21671600 | 0.10734600  | 0.34958200  |
| H | -7.85292300 | -0.28925700 | -0.43741800 |
| C | -6.11528700 | -0.60010900 | 0.75779600  |
| H | -5.88645000 | -1.55242700 | 0.29331300  |
| C | -7.54139000 | 1.35766600  | 0.94975300  |
| H | -8.41883300 | 1.90516100  | 0.61568600  |
| C | -6.75111500 | 1.85859800  | 1.95020600  |

|   |             |             |             |
|---|-------------|-------------|-------------|
| H | -6.99313200 | 2.80709900  | 2.42479200  |
| C | 2.93125900  | -5.23853900 | -1.07368900 |
| H | 2.61402700  | -6.20495200 | -0.69125100 |
| C | 4.27660200  | -4.81653800 | -0.87925600 |
| H | 4.97137800  | -5.45876000 | -0.34499300 |
| C | 4.68866400  | -3.60930100 | -1.37289400 |
| H | 5.71575900  | -3.27684500 | -1.24319700 |
| C | 2.03495800  | -4.44324700 | -1.73768600 |
| H | 1.01922500  | -4.79056000 | -1.88320800 |
| C | -1.13851600 | 3.92759800  | -1.41669500 |
| C | -1.11809900 | 4.52144700  | 0.03020700  |
| H | -0.52165000 | 5.43002600  | -0.02950000 |
| H | -2.13016100 | 4.86470800  | 0.28236300  |
| C | -0.60968000 | 3.68522600  | 1.17935300  |
| C | 0.27770800  | 3.38101000  | -1.74653800 |
| H | 0.98821200  | 4.20403900  | -1.67054900 |
| H | 0.30929500  | 3.02855500  | -2.78185700 |
| N | 0.79725800  | 2.29490800  | -0.90660100 |
| C | 2.02367700  | 2.30666300  | -0.35347300 |
| N | 2.59931500  | 1.14007900  | -0.02739700 |
| C | 3.92859800  | 1.00819700  | 0.48901000  |
| C | 5.00295500  | 1.24417100  | -0.36593800 |
| C | 4.14470500  | 0.56753000  | 1.79505400  |
| C | 6.30642800  | 1.04036100  | 0.08554100  |
| C | 5.45571400  | 0.37890600  | 2.23786400  |
| H | 3.30108300  | 0.36765100  | 2.44708500  |
| C | 6.54051100  | 0.61040300  | 1.39058400  |
| H | 7.55264600  | 0.45229200  | 1.74206600  |
| C | 5.69452100  | -0.14124700 | 3.63287000  |
| C | 7.44139000  | 1.28917700  | -0.86976000 |
| F | 5.60584900  | -1.48780800 | 3.68382300  |
| F | 4.79389900  | 0.35043800  | 4.50842300  |
| F | 6.92599900  | 0.19141100  | 4.08455800  |
| F | 7.21437400  | 0.68236800  | -2.06630400 |
| F | 8.61737300  | 0.82622800  | -0.40241000 |
| F | 7.59972100  | 2.60428700  | -1.13442800 |
| S | 2.78611800  | 3.81374800  | 0.09632700  |
| H | 4.81279500  | 1.56263900  | -1.38446500 |
| H | 2.08940800  | 0.25217200  | -0.12121900 |
| H | 0.33474600  | 1.37453800  | -1.01633300 |
| C | 0.41220700  | 4.18006100  | 2.01057300  |
| H | 1.39939000  | 3.99640600  | 1.09090600  |
| N | -0.59820800 | -1.44762500 | 1.36304100  |
| S | 0.90340100  | -1.43699300 | 1.84840500  |

|   |              |              |              |
|---|--------------|--------------|--------------|
| O | 1. 13412300  | -0. 46490400 | 2. 93541300  |
| O | 1. 91223000  | -1. 45346700 | 0. 75663400  |
| C | 1. 10023300  | -3. 10471900 | 2. 66512600  |
| F | 0. 87152200  | -4. 08316800 | 1. 78685600  |
| F | 0. 23744900  | -3. 22992800 | 3. 68716300  |
| F | 2. 34351700  | -3. 22344300 | 3. 14102800  |
| C | -2. 26895900 | 2. 92076900  | -1. 69779800 |
| C | -3. 47491600 | 2. 93748400  | -0. 98037900 |
| C | -2. 17862400 | 2. 02563100  | -2. 77592700 |
| C | -4. 53819800 | 2. 10089300  | -1. 31725000 |
| H | -3. 60516000 | 3. 60564000  | -0. 13579100 |
| C | -3. 23899400 | 1. 18814800  | -3. 12029200 |
| H | -1. 26828700 | 1. 95685900  | -3. 36129700 |
| C | -4. 42647300 | 1. 22156800  | -2. 39252300 |
| H | -5. 44948000 | 2. 13418900  | -0. 72960000 |
| H | -3. 12447600 | 0. 49799200  | -3. 95182800 |
| H | -5. 25134600 | 0. 56278500  | -2. 64856300 |
| C | -1. 29916200 | 5. 14948600  | -2. 41847800 |
| H | -0. 42355400 | 5. 79239100  | -2. 28181300 |
| H | -1. 21415000 | 4. 73157100  | -3. 43006900 |
| C | -2. 57410800 | 5. 97446600  | -2. 35426400 |
| C | -2. 65674200 | 7. 16812900  | -1. 72498700 |
| C | -1. 24284300 | 2. 35574000  | 1. 45278500  |
| H | -0. 58604600 | 1. 65756800  | 1. 97347800  |
| H | -2. 09572500 | 2. 53078000  | 2. 12991400  |
| H | -1. 63713300 | 1. 87114100  | 0. 56204200  |
| C | -3. 75778600 | 5. 42696000  | -3. 14479500 |
| H | -4. 09674100 | 6. 14702800  | -3. 90002400 |
| H | -3. 49334200 | 4. 50438500  | -3. 66530000 |
| H | -4. 61876100 | 5. 19058000  | -2. 50988100 |
| C | 0. 84817400  | 3. 37413300  | 3. 23517100  |
| H | 1. 76766900  | 3. 79923100  | 3. 64896500  |
| H | 0. 08142500  | 3. 41281700  | 4. 01941700  |
| H | 1. 03879000  | 2. 32041300  | 3. 01879300  |
| C | -3. 93245300 | 7. 98319600  | -1. 70672900 |
| H | -4. 14061900 | 8. 34916300  | -0. 69212100 |
| H | -3. 83230500 | 8. 87663300  | -2. 34065000 |
| H | -4. 80917800 | 7. 42996400  | -2. 04708000 |
| C | 0. 64684700  | 5. 68365600  | 2. 21862800  |
| H | 0. 41228600  | 6. 30711300  | 1. 35515200  |
| H | 0. 03371700  | 6. 02830100  | 3. 06088700  |
| H | 1. 69494600  | 5. 86047400  | 2. 48123800  |
| C | -1. 52602600 | 7. 87024300  | -1. 00540800 |
| H | -1. 69896300 | 7. 89164500  | 0. 08037600  |

|   |             |            |             |
|---|-------------|------------|-------------|
| H | -0.54157300 | 7.42970800 | -1.17673300 |
| H | -1.47407800 | 8.91990900 | -1.32524400 |

TS-EF-7RR-3

l imaginary frequency

H = -5472.484454

G = -5472.699506

E(M06-2X-DCM) = -5473.462491

|   |             |             |             |
|---|-------------|-------------|-------------|
| O | -0.38808200 | -2.72457000 | -1.01651100 |
| O | -2.52167200 | -1.49729900 | -0.17445700 |
| P | -0.88587300 | -1.37552900 | -0.21929700 |
| O | -0.52768900 | -0.12438600 | -0.95737600 |
| C | -1.59107900 | -3.04777200 | -5.01240500 |
| C | -2.42327100 | -3.46652400 | -3.97859200 |
| C | -1.97666500 | -3.42741700 | -2.65076400 |
| C | 0.14551000  | -2.47111100 | -3.37964800 |
| C | -0.30886900 | -2.59070100 | -4.70581700 |
| C | -3.12127000 | -2.60626600 | 0.42814800  |
| C | -3.18251500 | -3.81809300 | -0.26547000 |
| C | -3.61306700 | -4.97317800 | 0.40760200  |
| C | -4.07868000 | -4.90539300 | 1.71536400  |
| C | -4.14909100 | -3.66082700 | 2.33878600  |
| C | -3.68063700 | -2.49132300 | 1.71833400  |
| H | 0.36334100  | -2.29808600 | -5.50713200 |
| H | -4.56975600 | -3.57775400 | 3.33681200  |
| C | -2.96422000 | -4.14470800 | -1.74240200 |
| C | -4.28385300 | -3.95158400 | -2.56519600 |
| H | -4.69641000 | -2.96173700 | -2.33738400 |
| H | -5.04581000 | -4.69648000 | -2.31514300 |
| H | -4.47055700 | -6.53160300 | -0.83140600 |
| H | -3.02766000 | -7.04177800 | 0.03848600  |
| C | -0.73706400 | -2.86740600 | -2.35568900 |
| H | -1.92267700 | -3.08750100 | -6.04707500 |
| H | -4.40713600 | -5.80022400 | 2.23794200  |
| C | -3.83748400 | -4.00244000 | -4.04411300 |
| H | -4.48376100 | -3.40922400 | -4.70149200 |
| H | -3.85503000 | -5.03059300 | -4.43217500 |
| C | -3.48597300 | -6.19182800 | -0.48000400 |
| C | -2.62115800 | -5.66910800 | -1.64534000 |
| H | -1.55960400 | -5.77296300 | -1.39348900 |
| H | -2.79416600 | -6.19658100 | -2.58871600 |
| C | -3.92760200 | -1.18760500 | 2.41973500  |
| C | -3.16652300 | -0.80992500 | 3.55019700  |
| C | -5.05629200 | -0.42016800 | 2.03415600  |

|   |             |             |             |
|---|-------------|-------------|-------------|
| C | -2.05241800 | -1.57622600 | 4.01826500  |
| C | -3.51766900 | 0.38721100  | 4.28350700  |
| C | -5.40216600 | 0.76898400  | 2.78008000  |
| C | -1.33315000 | -1.18833100 | 5.11727100  |
| H | -1.76155200 | -2.46013400 | 3.46729100  |
| C | -2.74152800 | 0.75562300  | 5.42786300  |
| C | -4.61681100 | 1.14740900  | 3.87339000  |
| C | -1.68084300 | -0.00842400 | 5.83494700  |
| H | -0.47447300 | -1.77469500 | 5.42853500  |
| H | -3.02254700 | 1.65417100  | 5.97319200  |
| H | -4.88879000 | 2.03678900  | 4.43952100  |
| H | -1.09927800 | 0.28070900  | 6.70643500  |
| C | 1.53469800  | -1.97909300 | -3.12420200 |
| C | 1.91283300  | -0.67864000 | -3.54358000 |
| C | 2.49890400  | -2.84491300 | -2.54847300 |
| C | 0.98559300  | 0.26162900  | -4.10163800 |
| C | 3.28840500  | -0.25352400 | -3.40875600 |
| C | 3.86060800  | -2.38950200 | -2.38303300 |
| C | 1.39060500  | 1.49937300  | -4.53394500 |
| H | -0.05760200 | -0.02122200 | -4.17756400 |
| C | 3.67174600  | 1.04394000  | -3.87792700 |
| C | 4.22186300  | -1.11426500 | -2.82535400 |
| C | 2.75481400  | 1.89797400  | -4.43009900 |
| H | 0.66539600  | 2.18234300  | -4.97009300 |
| H | 4.71767300  | 1.33011800  | -3.79056400 |
| H | 5.25092400  | -0.78122000 | -2.70955800 |
| H | 3.06111000  | 2.87645300  | -4.79030600 |
| C | -7.04676300 | -0.07703800 | 0.65320200  |
| H | -7.69688200 | -0.40366300 | -0.15443400 |
| C | -5.92488000 | -0.80244100 | 0.96080900  |
| H | -5.69330900 | -1.69855200 | 0.39656900  |
| C | -7.37625000 | 1.09894900  | 1.38580500  |
| H | -8.27246700 | 1.65950900  | 1.13243400  |
| C | -6.56900600 | 1.51010100  | 2.41276500  |
| H | -6.81412100 | 2.40026600  | 2.98810600  |
| C | 3.15138200  | -4.98985700 | -1.57541700 |
| H | 2.89014100  | -5.99887500 | -1.26805300 |
| C | 4.48371300  | -4.52477500 | -1.38974200 |
| H | 5.22460300  | -5.17783600 | -0.93677200 |
| C | 4.82517800  | -3.26202700 | -1.78948100 |
| H | 5.84115600  | -2.89514700 | -1.66522500 |
| C | 2.19798800  | -4.18275400 | -2.13785300 |
| H | 1.19329600  | -4.56241300 | -2.27940000 |
| C | -1.37269700 | 4.04945600  | -0.98103400 |

|   |             |             |             |
|---|-------------|-------------|-------------|
| C | -1.32264700 | 4.49929600  | 0.51887700  |
| H | -0.76926400 | 5.43783900  | 0.54203900  |
| H | -2.33884900 | 4.74887200  | 0.84766100  |
| C | -0.75199800 | 3.56219700  | 1.55448000  |
| C | 0.04382700  | 3.57049400  | -1.40339800 |
| H | 0.73038500  | 4.40981000  | -1.29338000 |
| H | 0.03900700  | 3.30037700  | -2.46418300 |
| N | 0.63848500  | 2.44377800  | -0.67179000 |
| C | 1.88559100  | 2.46353300  | -0.16557100 |
| N | 2.52662200  | 1.30167900  | 0.02852600  |
| C | 3.88076300  | 1.19319600  | 0.48601400  |
| C | 4.90761800  | 1.54351200  | -0.38756000 |
| C | 4.16885800  | 0.67240500  | 1.74772500  |
| C | 6.23640000  | 1.37401200  | 0.00041400  |
| C | 5.50386300  | 0.51939000  | 2.12799900  |
| H | 3.36284400  | 0.38180600  | 2.41303500  |
| C | 6.54201100  | 0.86483100  | 1.26131000  |
| H | 7.57354800  | 0.73390300  | 1.56400100  |
| C | 5.82038300  | -0.08420300 | 3.47310800  |
| C | 7.31930400  | 1.74730700  | -0.97450000 |
| F | 5.77159600  | -1.43301800 | 3.43737800  |
| F | 4.94643300  | 0.32082600  | 4.41758500  |
| F | 7.06094800  | 0.25639700  | 3.89295100  |
| F | 7.08837800  | 1.19524900  | -2.19693100 |
| F | 8.53748900  | 1.33497100  | -0.57297300 |
| F | 7.38584900  | 3.08256700  | -1.16773700 |
| S | 2.59278300  | 3.95766100  | 0.39983800  |
| H | 4.66185100  | 1.92510500  | -1.37193000 |
| H | 2.05923600  | 0.40355400  | -0.14606300 |
| H | 0.22068400  | 1.51151000  | -0.84133500 |
| C | 0.27542100  | 3.99472500  | 2.41085100  |
| H | 1.24393400  | 3.96520300  | 1.44793600  |
| N | -0.40990500 | -1.58976400 | 1.31015400  |
| S | 1.10843200  | -1.55516000 | 1.74573900  |
| O | 1.33020600  | -0.68974000 | 2.92042800  |
| O | 2.07324300  | -1.40859100 | 0.62556800  |
| C | 1.40823100  | -3.28621000 | 2.37887200  |
| F | 1.19193400  | -4.17989400 | 1.41127700  |
| F | 0.58869200  | -3.55585400 | 3.40843000  |
| F | 2.67172800  | -3.39365800 | 2.80105800  |
| C | -2.49763500 | 3.05457400  | -1.30934400 |
| C | -3.77573100 | 3.20343100  | -0.74254100 |
| C | -2.33434400 | 2.03985500  | -2.26380000 |
| C | -4.83673000 | 2.37830000  | -1.10817100 |



|   |             |            |             |
|---|-------------|------------|-------------|
| H | -3.96251500 | 3.97451700 | -0.00274000 |
| C | -3.39365800 | 1.20928000 | -2.63349900 |
| H | -1.36985200 | 1.85494700 | -2.72065600 |
| C | -4.65136300 | 1.37540600 | -2.06073300 |
| H | -5.80330300 | 2.50821300 | -0.63178000 |
| H | -3.21972600 | 0.41840300 | -3.35770400 |
| H | -5.47452700 | 0.72169200 | -2.33443500 |
| C | -1.58472000 | 5.34400300 | -1.88161500 |
| H | -0.73333900 | 6.01069200 | -1.68336400 |
| H | -1.47033600 | 5.00917600 | -2.91597600 |
| C | -2.86042100 | 6.15518100 | -1.73592400 |
| C | -3.90739400 | 6.04129500 | -2.58313600 |
| C | -1.35633000 | 2.19902100 | 1.69631000  |
| H | -0.66536300 | 1.45316500 | 2.09211200  |
| H | -2.17242200 | 2.27705700 | 2.43384700  |
| H | -1.79492800 | 1.82261800 | 0.77377100  |
| C | -2.86502400 | 7.16581900 | -0.59562000 |
| H | -3.39005100 | 6.80112900 | 0.29877400  |
| H | -1.84331400 | 7.40921800 | -0.28540500 |
| H | -3.34063600 | 8.10911500 | -0.87873600 |
| C | 0.77079100  | 3.06959400 | 3.52265800  |
| H | 1.69097900  | 3.47231600 | 3.95691400  |
| H | 0.02819900  | 2.99530100 | 4.32741200  |
| H | 0.98250700  | 2.05281100 | 3.18316000  |
| C | -5.17959300 | 6.84746500 | -2.43421000 |
| H | -5.33095700 | 7.50052000 | -3.30558000 |
| H | -6.04715100 | 6.17407500 | -2.40212300 |
| H | -5.21392900 | 7.46758400 | -1.53727700 |
| C | 0.46608300  | 5.47326800 | 2.78181400  |
| H | 0.19717000  | 6.17900200 | 1.99480200  |
| H | -0.14276200 | 5.70297300 | 3.66527800  |
| H | 1.51266000  | 5.65485500 | 3.04700800  |
| C | -3.97677200 | 5.10070200 | -3.76401300 |
| H | -4.32089700 | 5.64163600 | -4.65622500 |
| H | -3.03250800 | 4.61337300 | -4.00894200 |
| H | -4.70845200 | 4.30421000 | -3.57414500 |

TS-EF-7RR-4

l imaginary frequency

H = -5472.480949

G = -5472.693554

E(M06-2X-DCM) = -5473.453812

|   |             |             |            |
|---|-------------|-------------|------------|
| 0 | -1.54171500 | -2.88905700 | 0.23429600 |
| 0 | -2.68375200 | -0.61268600 | 0.69834600 |

|   |             |             |             |
|---|-------------|-------------|-------------|
| P | -1.21108000 | -1.31332900 | 0.53554600  |
| O | -0.49960700 | -0.63846800 | -0.60106700 |
| C | -4.25609100 | -4.05932300 | -2.72912200 |
| C | -4.69614400 | -3.71167800 | -1.45635400 |
| C | -3.78235200 | -3.35754900 | -0.45267800 |
| C | -1.94576200 | -3.64589700 | -2.03477100 |
| C | -2.88908000 | -4.04169300 | -2.99919400 |
| C | -3.44546000 | -0.90712100 | 1.83195300  |
| C | -4.09075100 | -2.13737000 | 1.93645900  |
| C | -4.60501900 | -2.53214400 | 3.18118200  |
| C | -4.61233400 | -1.64875900 | 4.25593500  |
| C | -4.13715800 | -0.34891500 | 4.06682000  |
| C | -3.54248700 | 0.05104600  | 2.85975700  |
| H | -2.52921500 | -4.32622500 | -3.98365600 |
| H | -4.20878000 | 0.37704100  | 4.87173600  |
| C | -4.50539500 | -3.15247700 | 0.87416200  |
| C | -5.94179900 | -2.79617600 | 0.34762200  |
| H | -5.96696900 | -1.72914600 | 0.09772900  |
| H | -6.71820200 | -2.98116100 | 1.09603900  |
| H | -6.19652800 | -4.01160200 | 3.16720900  |
| H | -4.72193300 | -4.57010500 | 3.94787400  |
| C | -2.42473300 | -3.28244100 | -0.76154400 |
| H | -4.96337500 | -4.33955700 | -3.50563900 |
| H | -5.01051200 | -1.94919800 | 5.22192300  |
| C | -6.11383200 | -3.62851000 | -0.93845800 |
| H | -6.80023600 | -3.16480100 | -1.65609500 |
| H | -6.51458300 | -4.62828600 | -0.71804200 |
| C | -5.09981900 | -3.96327800 | 3.11689300  |
| C | -4.57467200 | -4.44867500 | 1.74401400  |
| H | -3.56275800 | -4.85459500 | 1.85370300  |
| H | -5.20107800 | -5.22404300 | 1.29093100  |
| C | -3.15175400 | 1.48336600  | 2.65485000  |
| C | -2.05784300 | 2.05405900  | 3.34604500  |
| C | -3.96487900 | 2.29328600  | 1.81998000  |
| C | -1.20121900 | 1.28726500  | 4.19768300  |
| C | -1.76788400 | 3.46269900  | 3.19126900  |
| C | -3.65545900 | 3.69667500  | 1.66490700  |
| C | -0.15272600 | 1.86892600  | 4.86123800  |
| H | -1.37751600 | 0.22379300  | 4.28970800  |
| C | -0.66676200 | 4.03065700  | 3.90586400  |
| C | -2.56629100 | 4.24198600  | 2.35093700  |
| C | 0.11594200  | 3.26035600  | 4.72249500  |
| H | 0.49175400  | 1.25779100  | 5.48537700  |
| H | -0.46844300 | 5.09323800  | 3.78424200  |

|   |             |             |             |
|---|-------------|-------------|-------------|
| H | -2.33626600 | 5.29735100  | 2.22574600  |
| H | 0.94933700  | 3.70394200  | 5.26139300  |
| C | -0.49656900 | -3.66373800 | -2.40704000 |
| C | -0.02637000 | -2.78943600 | -3.41719100 |
| C | 0.37308700  | -4.62871400 | -1.84214000 |
| C | -0.83633700 | -1.75171700 | -3.98410600 |
| C | 1.32617200  | -2.92508000 | -3.90799100 |
| C | 1.73648000  | -4.72335900 | -2.31234200 |
| C | -0.36949000 | -0.94520700 | -4.99056100 |
| H | -1.83568300 | -1.59570700 | -3.59586400 |
| C | 1.76747200  | -2.08074800 | -4.97625000 |
| C | 2.17092600  | -3.88199500 | -3.34007700 |
| C | 0.94577500  | -1.12285400 | -5.50953500 |
| H | -1.00489200 | -0.16068800 | -5.38997900 |
| H | 2.77370300  | -2.22834600 | -5.36390300 |
| H | 3.18945400  | -3.98104700 | -3.71118700 |
| H | 1.28964700  | -0.49727300 | -6.32960300 |
| C | -5.88472100 | 2.60474100  | 0.33505200  |
| H | -6.75357400 | 2.19509900  | -0.17351000 |
| C | -5.11697200 | 1.79397000  | 1.13004900  |
| H | -5.38873500 | 0.75179700  | 1.25091800  |
| C | -5.55993800 | 3.98044800  | 0.16952700  |
| H | -6.17683400 | 4.60819200  | -0.46799800 |
| C | -4.47729700 | 4.50746400  | 0.82042500  |
| H | -4.21899100 | 5.55633600  | 0.70505100  |
| C | 0.82036700  | -6.47752700 | -0.30868900 |
| H | 0.47723400  | -7.16129000 | 0.46282500  |
| C | 2.16805500  | -6.55230800 | -0.76123000 |
| H | 2.83932100  | -7.29174500 | -0.33250400 |
| C | 2.60804800  | -5.70078100 | -1.73794600 |
| H | 3.63134300  | -5.75338500 | -2.10277800 |
| C | -0.04444300 | -5.55361900 | -0.83263400 |
| H | -1.06720400 | -5.51488000 | -0.47740600 |
| C | 5.32037900  | 0.88035200  | 0.02345300  |
| C | 5.49378300  | 1.53020900  | -1.39932400 |
| H | 5.56429200  | 2.60876500  | -1.24953300 |
| H | 6.47296800  | 1.21432300  | -1.79011200 |
| C | 4.50099600  | 1.25667200  | -2.49004300 |
| C | 4.02027200  | 1.43077600  | 0.68349100  |
| H | 4.14957100  | 2.50446300  | 0.82094000  |
| H | 3.89921200  | 0.97868200  | 1.66991700  |
| N | 2.74409500  | 1.23625100  | -0.02349100 |
| C | 1.92686500  | 2.23487200  | -0.45338200 |
| N | 0.63903800  | 1.89221900  | -0.65850300 |

|   |             |             |             |
|---|-------------|-------------|-------------|
| C | -0.37725800 | 2.65702600  | -1.29459500 |
| C | -0.63274900 | 3.99530800  | -0.98129200 |
| C | -1.18489400 | 1.99114800  | -2.22330600 |
| C | -1.65857300 | 4.67113400  | -1.64228300 |
| C | -2.21772100 | 2.67814000  | -2.86114700 |
| H | -1.01369500 | 0.93880800  | -2.42060200 |
| C | -2.45483100 | 4.02392300  | -2.58669300 |
| H | -3.26283600 | 4.55146800  | -3.07807300 |
| C | -3.04235600 | 1.96397700  | -3.89856000 |
| C | -1.87955800 | 6.13251400  | -1.35619400 |
| F | -2.41207700 | 1.94345800  | -5.10452500 |
| F | -4.23710100 | 2.55777300  | -4.09666800 |
| F | -3.27452600 | 0.67649000  | -3.56518600 |
| F | -1.59722200 | 6.44663800  | -0.06962100 |
| F | -3.15776100 | 6.50747300  | -1.58993200 |
| F | -1.09384400 | 6.91737600  | -2.12876500 |
| S | 2.55450100  | 3.80403900  | -0.82661400 |
| H | -0.05409600 | 4.49863200  | -0.22013200 |
| H | 0.34724300  | 0.90636600  | -0.49809800 |
| H | 2.25191500  | 0.40232500  | 0.31024100  |
| C | 3.97856400  | 2.37221700  | -3.21887200 |
| H | 3.39546200  | 2.86881900  | -2.27242400 |
| N | -0.53879700 | -1.33939200 | 2.00433400  |
| S | 0.99732000  | -1.65409500 | 2.19544500  |
| O | 1.85328600  | -0.43496000 | 2.15153100  |
| O | 1.52520300  | -2.81969100 | 1.46378500  |
| C | 1.02231400  | -2.18261700 | 3.98354200  |
| F | 0.55148400  | -1.23289700 | 4.80333200  |
| F | 2.29201600  | -2.44186800 | 4.32476100  |
| F | 0.29639900  | -3.28969900 | 4.14792800  |
| C | 5.44484900  | -0.65021400 | -0.05275200 |
| C | 6.56539100  | -1.22369100 | -0.68405500 |
| C | 4.48883800  | -1.52172600 | 0.48252800  |
| C | 6.71215900  | -2.60510400 | -0.79053700 |
| H | 7.34751600  | -0.59071900 | -1.09756700 |
| C | 4.62436200  | -2.91014100 | 0.36768500  |
| H | 3.62098200  | -1.14774600 | 1.01058800  |
| C | 5.73464700  | -3.45755800 | -0.26969200 |
| H | 7.59112900  | -3.01468700 | -1.28225300 |
| H | 3.83908600  | -3.53961800 | 0.77336600  |
| H | 5.84123900  | -4.53513200 | -0.36017000 |
| C | 6.51260800  | 1.47696300  | 0.87853300  |
| H | 6.51254000  | 2.55817800  | 0.71469200  |
| H | 7.44521700  | 1.10282300  | 0.43736900  |

|   |             |              |              |
|---|-------------|--------------|--------------|
| C | 6. 52776900 | 1. 17238800  | 2. 36971800  |
| C | 6. 17275900 | 2. 08002000  | 3. 30738400  |
| C | 2. 94782700 | 2. 13200600  | -4. 32357500 |
| H | 2. 13149100 | 1. 47772100  | -4. 00837900 |
| H | 2. 50607200 | 3. 08886800  | -4. 61742100 |
| H | 3. 41184500 | 1. 69453000  | -5. 21586000 |
| C | 6. 16713200 | 1. 77670700  | 4. 79110000  |
| H | 6. 94436700 | 2. 35552900  | 5. 31109800  |
| H | 5. 20911900 | 2. 08335700  | 5. 23172100  |
| H | 6. 31130900 | 0. 72267400  | 5. 03003300  |
| C | 4. 09224900 | -0. 14083800 | -2. 80061300 |
| H | 5. 00065200 | -0. 68538600 | -3. 10266700 |
| H | 3. 72658700 | -0. 68352300 | -1. 92574600 |
| H | 3. 36292800 | -0. 21081300 | -3. 60495400 |
| C | 7. 01958000 | -0. 21882000 | 2. 73744300  |
| H | 6. 20368200 | -0. 95013800 | 2. 79006200  |
| H | 7. 71834100 | -0. 59268500 | 1. 98217700  |
| H | 7. 54068800 | -0. 23438400 | 3. 69778500  |
| C | 4. 91569100 | 3. 54749400  | -3. 58045000 |
| H | 5. 44748100 | 3. 30818000  | -4. 50894000 |
| H | 4. 31536300 | 4. 44505700  | -3. 75331400 |
| H | 5. 65471800 | 3. 78196500  | -2. 81384200 |
| C | 5. 72621300 | 3. 50029500  | 3. 03320200  |
| H | 5. 89119400 | 3. 84269900  | 2. 00982400  |
| H | 4. 65584100 | 3. 62119300  | 3. 25140500  |
| H | 6. 25546500 | 4. 19365500  | 3. 70081500  |

TS-EF-7RR-5

l imaginary frequency

H = -5472. 482367

G = -5472. 695601

E(M06-2X-DCM) = -5473. 455811

|   |              |              |              |
|---|--------------|--------------|--------------|
| O | -2. 56702800 | -2. 01039400 | 0. 04977200  |
| O | -2. 38791600 | 0. 45634000  | 0. 83070700  |
| P | -1. 48195000 | -0. 87157300 | 0. 50222100  |
| O | -0. 56046500 | -0. 50127300 | -0. 63356400 |
| C | -5. 36998200 | -1. 23540800 | -2. 96961400 |
| C | -5. 61183500 | -0. 85245100 | -1. 65505400 |
| C | -4. 69131000 | -1. 15131700 | -0. 63920600 |
| C | -3. 21303800 | -2. 17312000 | -2. 29011900 |
| C | -4. 18693300 | -1. 90778900 | -3. 26876200 |
| C | -3. 22327400 | 0. 43040700  | 1. 95239700  |
| C | -4. 42963400 | -0. 26694600 | 1. 89997900  |
| C | -5. 13474000 | -0. 50272000 | 3. 09081300  |

|   |             |             |             |
|---|-------------|-------------|-------------|
| C | -4.72047400 | 0.07470800  | 4.28601000  |
| C | -3.60327000 | 0.91052500  | 4.28036100  |
| C | -2.82491100 | 1.09896100  | 3.12655000  |
| H | -3.98876000 | -2.22416500 | -4.28867800 |
| H | -3.30068400 | 1.41597800  | 5.19280800  |
| C | -5.26245500 | -0.75832600 | 0.71846700  |
| C | -6.26720500 | 0.36440400  | 0.27794700  |
| H | -5.71400200 | 1.30415300  | 0.16612200  |
| H | -7.05789100 | 0.52990400  | 1.01587100  |
| H | -7.26606600 | -0.88078400 | 2.90619400  |
| H | -6.36322000 | -2.23945600 | 3.56626000  |
| C | -3.48426800 | -1.76731600 | -0.96862400 |
| H | -6.08705400 | -1.01312500 | -3.75582400 |
| H | -5.26645800 | -0.10167000 | 5.20941000  |
| C | -6.79285200 | -0.09083100 | -1.09785100 |
| H | -7.09406900 | 0.74740100  | -1.73646700 |
| H | -7.67264200 | -0.74199300 | -0.99523300 |
| C | -6.31192400 | -1.42181200 | 2.83808200  |
| C | -6.04858200 | -1.92480800 | 1.39987200  |
| H | -5.40679200 | -2.81263200 | 1.42760500  |
| H | -6.96269300 | -2.18693300 | 0.85734300  |
| C | -1.67008400 | 2.05131300  | 3.17530900  |
| C | -0.53563600 | 1.76584900  | 3.97214700  |
| C | -1.77585100 | 3.30073900  | 2.51259700  |
| C | -0.37030200 | 0.51972600  | 4.65579900  |
| C | 0.51236300  | 2.75274500  | 4.10858000  |
| C | -0.71322400 | 4.27237300  | 2.64558600  |
| C | 0.72885200  | 0.27467300  | 5.43520400  |
| H | -1.11863000 | -0.24914400 | 4.52360700  |
| C | 1.64011300  | 2.46099500  | 4.93880400  |
| C | 0.39908200  | 3.97273400  | 3.43758000  |
| C | 1.74369400  | 1.26177700  | 5.59184100  |
| H | 0.83553800  | -0.69081900 | 5.92042600  |
| H | 2.41191000  | 3.22048100  | 5.04275700  |
| H | 1.18912100  | 4.71380800  | 3.54427700  |
| H | 2.60179400  | 1.05516300  | 6.22633700  |
| C | -1.96076600 | -2.87732300 | -2.70613200 |
| C | -1.07076100 | -2.24136800 | -3.60651800 |
| C | -1.72030200 | -4.20938000 | -2.29102600 |
| C | -1.25168300 | -0.89339900 | -4.05903200 |
| C | 0.07742100  | -2.96328800 | -4.10563200 |
| C | -0.56299900 | -4.91525100 | -2.79140100 |
| C | -0.38885200 | -0.31283700 | -4.95333900 |
| H | -2.09505300 | -0.32393800 | -3.68664200 |

|   |             |             |             |
|---|-------------|-------------|-------------|
| C | 0.95409200  | -2.32296800 | -5.03797500 |
| C | 0.30197200  | -4.27591000 | -3.68316800 |
| C | 0.72879700  | -1.03850300 | -5.45779700 |
| H | -0.56243100 | 0.70837400  | -5.28028600 |
| H | 1.80066100  | -2.89129700 | -5.41776300 |
| H | 1.16856800  | -4.81496700 | -4.06043500 |
| H | 1.39193900  | -0.57196300 | -6.18242000 |
| C | -2.99436400 | 4.89768500  | 1.11585600  |
| H | -3.87529300 | 5.15277500  | 0.53249700  |
| C | -2.91699900 | 3.67581000  | 1.73206100  |
| H | -3.73941600 | 2.97595600  | 1.63866200  |
| C | -1.93493700 | 5.84125300  | 1.23340200  |
| H | -2.00285200 | 6.79800200  | 0.72397500  |
| C | -0.82983700 | 5.53299900  | 1.98020900  |
| H | -0.01278800 | 6.24330300  | 2.07692000  |
| C | -2.34782000 | -6.21176400 | -1.03973100 |
| H | -3.02975200 | -6.72240300 | -0.36541500 |
| C | -1.19899800 | -6.89824900 | -1.52526100 |
| H | -1.01565400 | -7.92452500 | -1.21860100 |
| C | -0.33677000 | -6.26606500 | -2.37938700 |
| H | 0.53768800  | -6.78225400 | -2.76926500 |
| C | -2.59995900 | -4.91801500 | -1.41180900 |
| H | -3.48265800 | -4.41400500 | -1.03640400 |
| C | 4.73067100  | -1.44088700 | 0.05162100  |
| C | 5.50892700  | -0.61028700 | -1.01997100 |
| H | 5.98214100  | 0.21895800  | -0.49672500 |
| H | 6.33327300  | -1.22742600 | -1.40717100 |
| C | 4.78585200  | -0.06830000 | -2.22131500 |
| C | 3.62691500  | -0.54217600 | 0.67731800  |
| H | 4.12312000  | 0.28942500  | 1.17727000  |
| H | 3.06918800  | -1.10014100 | 1.43519600  |
| N | 2.63255300  | 0.04314400  | -0.24219900 |
| C | 2.34188500  | 1.37117100  | -0.35368900 |
| N | 1.07422100  | 1.64931600  | -0.70640500 |
| C | 0.50877300  | 2.79880700  | -1.31089700 |
| C | 0.87495300  | 4.11977500  | -1.02852600 |
| C | -0.52773000 | 2.54587700  | -2.22004500 |
| C | 0.23061400  | 5.16397200  | -1.69236200 |
| C | -1.16265300 | 3.60234500  | -2.86827800 |
| H | -0.82626800 | 1.52081000  | -2.41146400 |
| C | -0.78413500 | 4.92040600  | -2.61719800 |
| H | -1.28633900 | 5.74197100  | -3.11416600 |
| C | -2.22004400 | 3.30130500  | -3.89686300 |
| C | 0.65290300  | 6.58714800  | -1.43600900 |

|   |             |             |             |
|---|-------------|-------------|-------------|
| F | -1.66648700 | 3.02474700  | -5.10734400 |
| F | -3.05918500 | 4.34091600  | -4.08135300 |
| F | -2.96512800 | 2.22729900  | -3.55828700 |
| F | 1.31709000  | 6.72599300  | -0.26897900 |
| F | -0.40995600 | 7.42455900  | -1.40155700 |
| F | 1.47197500  | 7.04244100  | -2.41339500 |
| S | 3.57811800  | 2.56286600  | -0.16155400 |
| H | 1.63149700  | 4.33404700  | -0.28973100 |
| H | 0.40717100  | 0.84466700  | -0.66106800 |
| H | 1.84516500  | -0.57074900 | -0.46083900 |
| C | 4.99218700  | 1.28879900  | -2.58540400 |
| H | 4.37754000  | 1.74557800  | -1.57967500 |
| N | -0.88213300 | -1.34594900 | 1.91221100  |
| S | 0.03452400  | -2.61818300 | 2.15562800  |
| O | 1.35177400  | -2.25076700 | 2.71165400  |
| O | 0.01630800  | -3.61969800 | 1.07362600  |
| C | -0.84804900 | -3.45287000 | 3.57358300  |
| F | -0.86721500 | -2.67553700 | 4.66873300  |
| F | -0.20802700 | -4.58878100 | 3.87665100  |
| F | -2.10769000 | -3.74377700 | 3.23444700  |
| C | 4.25550300  | -2.80195800 | -0.48849800 |
| C | 5.13850200  | -3.61287400 | -1.22786100 |
| C | 2.99440700  | -3.32926200 | -0.18785500 |
| C | 4.76598100  | -4.88264000 | -1.66320700 |
| H | 6.14028700  | -3.26320300 | -1.46543400 |
| C | 2.61385600  | -4.60218100 | -0.62249500 |
| H | 2.28518700  | -2.78276600 | 0.41833500  |
| C | 3.49644300  | -5.38311000 | -1.36449200 |
| H | 5.47271000  | -5.48296200 | -2.23092500 |
| H | 1.62415800  | -4.96058000 | -0.36083200 |
| H | 3.20524600  | -6.37510900 | -1.69954500 |
| C | 5.72451900  | -1.80739000 | 1.23684600  |
| H | 6.50344600  | -2.44515100 | 0.80163700  |
| H | 5.15310600  | -2.46007300 | 1.90111300  |
| C | 6.39440600  | -0.69529100 | 2.02913300  |
| C | 5.94028800  | -0.26642200 | 3.22829900  |
| C | 4.29870600  | 1.85511900  | -3.82591300 |
| H | 3.22238000  | 1.66433800  | -3.83530100 |
| H | 4.43633100  | 2.93979500  | -3.85817600 |
| H | 4.72616200  | 1.43930800  | -4.74659500 |
| C | 6.64031800  | 0.81725600  | 4.01963800  |
| H | 5.92236000  | 1.59348600  | 4.31608700  |
| H | 7.05331800  | 0.40801200  | 4.95293800  |
| H | 7.45256800  | 1.30660200  | 3.47937600  |



|   |            |             |             |
|---|------------|-------------|-------------|
| C | 3.89295000 | -0.94765300 | -3.03441600 |
| H | 4.53340800 | -1.43906000 | -3.78728000 |
| H | 3.41961600 | -1.74176700 | -2.46179300 |
| H | 3.13466200 | -0.39478200 | -3.58926900 |
| C | 7.68751300 | -0.14211800 | 1.43579500  |
| H | 8.00757300 | -0.73033900 | 0.56983600  |
| H | 7.59710000 | 0.90182200  | 1.10458700  |
| H | 8.51234200 | -0.17112500 | 2.15679200  |
| C | 6.35613800 | 1.96715700  | -2.35333100 |
| H | 6.99410300 | 1.79171500  | -3.22814900 |
| H | 6.21471300 | 3.04742800  | -2.25249300 |
| H | 6.88918400 | 1.61541400  | -1.46989700 |
| C | 4.71598500 | -0.79225700 | 3.94222100  |
| H | 4.24980400 | -1.66361700 | 3.48086700  |
| H | 4.97674600 | -1.06298000 | 4.97488000  |
| H | 3.94252500 | -0.01590500 | 4.01536000  |

TS-EF-7RR-6

1 imaginary frequency

H = -5472.484096

G = -5472.698681

E(M06-2X-DCM) = -5473.462225

|   |             |             |             |
|---|-------------|-------------|-------------|
| O | -0.52785600 | -2.78121900 | -0.85028300 |
| O | -2.65615100 | -1.43130700 | -0.19878100 |
| P | -1.01674600 | -1.35353100 | -0.19669300 |
| O | -0.60019700 | -0.17942200 | -1.02390000 |
| C | -1.58579300 | -3.42653600 | -4.84713100 |
| C | -2.47022300 | -3.72703500 | -3.81558600 |
| C | -2.07330900 | -3.58337000 | -2.47945800 |
| C | 0.10710000  | -2.76343500 | -3.20138000 |
| C | -0.30070300 | -2.98511000 | -4.52956000 |
| C | -3.30735400 | -2.46918100 | 0.47180700  |
| C | -3.37732900 | -3.73430200 | -0.11810400 |
| C | -3.86499100 | -4.81602900 | 0.63359100  |
| C | -4.37521800 | -4.62478200 | 1.91213800  |
| C | -4.43464900 | -3.32963500 | 2.42384400  |
| C | -3.91246500 | -2.22997000 | 1.72405400  |
| H | 0.41175500  | -2.78753300 | -5.32517600 |
| H | -4.89049700 | -3.15035900 | 3.39342000  |
| C | -3.11538900 | -4.19157700 | -1.55275500 |
| C | -4.39693600 | -4.03359000 | -2.44043700 |
| H | -4.78613800 | -3.01651100 | -2.31439000 |
| H | -5.19051900 | -4.73258300 | -2.15812200 |
| H | -4.72354200 | -6.45143900 | -0.50066900 |

|   |             |             |             |
|---|-------------|-------------|-------------|
| H | -3.32799900 | -6.92341300 | 0.46303200  |
| C | -0.82847500 | -3.03569100 | -2.18423000 |
| H | -1.87905100 | -3.54732300 | -5.88710300 |
| H | -4.74714800 | -5.46307200 | 2.49577300  |
| C | -3.89796100 | -4.22462500 | -3.89100000 |
| H | -4.49980600 | -3.67098700 | -4.62109700 |
| H | -3.93523100 | -5.28128200 | -4.19116600 |
| C | -3.74233500 | -6.10907100 | -0.14235100 |
| C | -2.82195700 | -5.71088800 | -1.31412700 |
| H | -1.77353500 | -5.82119500 | -1.01448400 |
| H | -2.97700900 | -6.31226400 | -2.21546400 |
| C | -4.15722600 | -0.86349300 | 2.29481200  |
| C | -3.41888700 | -0.38654200 | 3.40219600  |
| C | -5.26467100 | -0.12333400 | 1.80780400  |
| C | -2.33553500 | -1.12251900 | 3.97825200  |
| C | -3.76441200 | 0.88518300  | 4.00045700  |
| C | -5.60656000 | 1.14069300  | 2.42052100  |
| C | -1.63784000 | -0.63838000 | 5.05273500  |
| H | -2.05179400 | -2.06495400 | 3.53044100  |
| C | -3.00997800 | 1.35463800  | 5.12226000  |
| C | -4.83860000 | 1.61768200  | 3.48723000  |
| C | -1.97748100 | 0.61610400  | 5.63508000  |
| H | -0.80238600 | -1.20727500 | 5.44811800  |
| H | -3.28570700 | 2.30939300  | 5.56510500  |
| H | -5.10588800 | 2.56552200  | 3.95147200  |
| H | -1.41311200 | 0.98173500  | 6.48898900  |
| C | 1.50606300  | -2.30697800 | -2.93251600 |
| C | 1.95754200  | -1.06552000 | -3.44699100 |
| C | 2.41005000  | -3.16012600 | -2.24974400 |
| C | 1.09253200  | -0.13890600 | -4.11637800 |
| C | 3.34668200  | -0.69098000 | -3.30087600 |
| C | 3.78530700  | -2.75126500 | -2.07436000 |
| C | 1.56969900  | 1.03457100  | -4.64382400 |
| H | 0.03883100  | -0.37842400 | -4.19577400 |
| C | 3.80504700  | 0.54124700  | -3.86804900 |
| C | 4.21987800  | -1.53708300 | -2.61232600 |
| C | 2.94729500  | 1.38043600  | -4.52757700 |
| H | 0.89242500  | 1.70698700  | -5.16544700 |
| H | 4.85982400  | 0.78854500  | -3.76837200 |
| H | 5.25966500  | -1.24137100 | -2.49045600 |
| H | 3.31044400  | 2.30778200  | -4.96249700 |
| C | -7.21671700 | 0.10741300  | 0.34959700  |
| H | -7.85292500 | -0.28916500 | -0.43741500 |
| C | -6.11529400 | -0.60006100 | 0.75779500  |

|   |             |             |             |
|---|-------------|-------------|-------------|
| H | -5.88646300 | -1.55236900 | 0.29328800  |
| C | -7.54138400 | 1.35771800  | 0.94980100  |
| H | -8.41882300 | 1.90522800  | 0.61574700  |
| C | -6.75110700 | 1.85862000  | 1.95026800  |
| H | -6.99311800 | 2.80711000  | 2.42487900  |
| C | 2.93124500  | -5.23846800 | -1.07377300 |
| H | 2.61402000  | -6.20488700 | -0.69134100 |
| C | 4.27658600  | -4.81646100 | -0.87934400 |
| H | 4.97136900  | -5.45868300 | -0.34509100 |
| C | 4.68863700  | -3.60921600 | -1.37297400 |
| H | 5.71573100  | -3.27675600 | -1.24328000 |
| C | 2.03493400  | -4.44317500 | -1.73775600 |
| H | 1.01920200  | -4.79049300 | -1.88327500 |
| C | -1.13845400 | 3.92761900  | -1.41663900 |
| C | -1.11800300 | 4.52146700  | 0.03026300  |
| H | -0.52150400 | 5.43001300  | -0.02945600 |
| H | -2.13004600 | 4.86478000  | 0.28242100  |
| C | -0.60960800 | 3.68523200  | 1.17940900  |
| C | 0.27775600  | 3.38100800  | -1.74650300 |
| H | 0.98827600  | 4.20402700  | -1.67055200 |
| H | 0.30931200  | 3.02851900  | -2.78181100 |
| N | 0.79729700  | 2.29491200  | -0.90654500 |
| C | 2.02372600  | 2.30664200  | -0.35343900 |
| N | 2.59933700  | 1.14004800  | -0.02735200 |
| C | 3.92862100  | 1.00813700  | 0.48904500  |
| C | 5.00298000  | 1.24411800  | -0.36590000 |
| C | 4.14472500  | 0.56743100  | 1.79507800  |
| C | 6.30645100  | 1.04028000  | 0.08557200  |
| C | 5.45573200  | 0.37878100  | 2.23788100  |
| H | 3.30110200  | 0.36754400  | 2.44710500  |
| C | 6.54053000  | 0.61028900  | 1.39060500  |
| H | 7.55266400  | 0.45215800  | 1.74208100  |
| C | 5.69455000  | -0.14141900 | 3.63286700  |
| C | 7.44142100  | 1.28911900  | -0.86971400 |
| F | 5.60606000  | -1.48799600 | 3.68373800  |
| F | 4.79383100  | 0.35009400  | 4.50841500  |
| F | 6.92596800  | 0.19137700  | 4.08461900  |
| F | 7.21432900  | 0.68249600  | -2.06633600 |
| F | 8.61736600  | 0.82599300  | -0.40244200 |
| F | 7.59987800  | 2.60425000  | -1.13420200 |
| S | 2.78621400  | 3.81371600  | 0.09631200  |
| H | 4.81282300  | 1.56261100  | -1.38441800 |
| H | 2.08940900  | 0.25214900  | -0.12115400 |
| H | 0.33477100  | 1.37455000  | -1.01628400 |

|   |             |             |             |
|---|-------------|-------------|-------------|
| C | 0.41230500  | 4.18003700  | 2.01061900  |
| H | 1.39947000  | 3.99640300  | 1.09092800  |
| N | -0.59824400 | -1.44761600 | 1.36301900  |
| S | 0.90336600  | -1.43703400 | 1.84837800  |
| O | 1.13411300  | -0.46498800 | 2.93541900  |
| O | 1.91218900  | -1.45348900 | 0.75660000  |
| C | 1.10017400  | -3.10479300 | 2.66503800  |
| F | 0.87143200  | -4.08320700 | 1.78673800  |
| F | 0.23740000  | -3.23001800 | 3.68708100  |
| F | 2.34346100  | -3.22356000 | 3.14092100  |
| C | -2.26892200 | 2.92081700  | -1.69772900 |
| C | -3.47487700 | 2.93757700  | -0.98030600 |
| C | -2.17861700 | 2.02566100  | -2.77584500 |
| C | -4.53818300 | 2.10101000  | -1.31716000 |
| H | -3.60509700 | 3.60575100  | -0.13572800 |
| C | -3.23901300 | 1.18820500  | -3.12019600 |
| H | -1.26828400 | 1.95685100  | -3.36121700 |
| C | -4.42648700 | 1.22166700  | -2.39242200 |
| H | -5.44946200 | 2.13433800  | -0.72950600 |
| H | -3.12451700 | 0.49803300  | -3.95172200 |
| H | -5.25137900 | 0.56290300  | -2.64844800 |
| C | -1.29909100 | 5.14951800  | -2.41841200 |
| H | -0.42348700 | 5.79242400  | -2.28173100 |
| H | -1.21406500 | 4.73161100  | -3.43000600 |
| C | -2.57404100 | 5.97449400  | -2.35421100 |
| C | -2.65668900 | 7.16814700  | -1.72491800 |
| C | -1.24281500 | 2.35577100  | 1.45285000  |
| H | -0.58604600 | 1.65758500  | 1.97355900  |
| H | -2.09569700 | 2.53085200  | 2.12997000  |
| H | -1.63711800 | 1.87117400  | 0.56211200  |
| C | -3.75770300 | 5.42699500  | -3.14476900 |
| H | -4.09666100 | 6.14708000  | -3.89998000 |
| H | -3.49324100 | 4.50443800  | -3.66529800 |
| H | -4.61868000 | 5.19058300  | -2.50986900 |
| C | 0.84828900  | 3.37407700  | 3.23519000  |
| H | 1.76779500  | 3.79916000  | 3.64897500  |
| H | 0.08155600  | 3.41274800  | 4.01945200  |
| H | 1.03889600  | 2.32036000  | 3.01878300  |
| C | -3.93240300 | 7.98321100  | -1.70667300 |
| H | -4.14056100 | 8.34920500  | -0.69207300 |
| H | -3.83226500 | 8.87663100  | -2.34062000 |
| H | -4.80912900 | 7.42996600  | -2.04700000 |
| C | -1.52598600 | 7.87025800  | -1.00531500 |
| H | -1.47402700 | 8.91992300  | -1.32515200 |

|   |             |            |             |
|---|-------------|------------|-------------|
| H | -1.69894800 | 7.89166300 | 0.08046400  |
| H | -0.54153100 | 7.42971900 | -1.17661700 |
| C | 0.64693800  | 5.68362500 | 2.21873200  |
| H | 1.69508200  | 5.86046900 | 2.48115200  |
| H | 0.41217300  | 6.30714000 | 1.35535300  |
| H | 0.03396000  | 6.02817700 | 3.06114000  |

TS-EF-7RR-7

1 imaginary frequency

H = -5472.476546

G = -5472.692777

E(M06-2X-DCM) = -5473.451246

|   |             |             |             |
|---|-------------|-------------|-------------|
| O | -1.10125300 | -2.51412600 | -1.39449900 |
| O | -2.94324100 | -1.07898700 | -0.26945400 |
| P | -1.32216600 | -1.26164900 | -0.35928000 |
| O | -0.77680000 | 0.02962500  | -0.89284900 |
| C | -2.32815100 | -1.85499400 | -5.34224400 |
| C | -3.23817800 | -2.26708800 | -4.37401700 |
| C | -2.80697300 | -2.56895800 | -3.07376500 |
| C | -0.52315600 | -1.95744500 | -3.68869600 |
| C | -0.98064900 | -1.73903700 | -5.00030900 |
| C | -3.75344800 | -2.13546100 | 0.14795900  |
| C | -4.10343200 | -3.13002100 | -0.76592400 |
| C | -4.79692100 | -4.26227400 | -0.30922600 |
| C | -5.23149600 | -4.34706000 | 1.00877600  |
| C | -4.97094300 | -3.28741600 | 1.87625000  |
| C | -4.22023600 | -2.16861100 | 1.47726400  |
| H | -0.25626100 | -1.44934000 | -5.75583000 |
| H | -5.33423100 | -3.32424900 | 2.89895400  |
| C | -3.94598300 | -3.20538700 | -2.28404000 |
| C | -5.17563300 | -2.56825500 | -3.01609600 |
| H | -5.35127000 | -1.56812700 | -2.60263900 |
| H | -6.09204200 | -3.15066200 | -2.87917900 |
| H | -5.98187700 | -5.29977100 | -1.80091900 |
| H | -4.71828900 | -6.29763300 | -1.08914700 |
| C | -1.47667000 | -2.34387100 | -2.72609400 |
| H | -2.65464800 | -1.63307000 | -6.35523900 |
| H | -5.77419100 | -5.22076500 | 1.36080000  |
| C | -4.73562700 | -2.45300600 | -4.49249200 |
| H | -5.22251200 | -1.62189700 | -5.01572700 |
| H | -4.98106500 | -3.36458000 | -5.05528800 |
| C | -4.95133500 | -5.27880800 | -1.41909900 |
| C | -3.96563100 | -4.75841700 | -2.48621700 |
| H | -2.96210400 | -5.15043600 | -2.28510400 |

|   |              |              |              |
|---|--------------|--------------|--------------|
| H | -4. 23727300 | -5. 04338000 | -3. 50742300 |
| C | -4. 00267300 | -1. 06353100 | 2. 46426500  |
| C | -3. 26074300 | -1. 30800100 | 3. 64641500  |
| C | -4. 63677400 | 0. 18988300  | 2. 26985200  |
| C | -2. 55302700 | -2. 53102900 | 3. 87748900  |
| C | -3. 18348000 | -0. 28745600 | 4. 66800600  |
| C | -4. 52303900 | 1. 21338800  | 3. 28533800  |
| C | -1. 85343100 | -2. 74237400 | 5. 03590800  |
| H | -2. 54154000 | -3. 28221400 | 3. 09868800  |
| C | -2. 45788500 | -0. 55606700 | 5. 87146800  |
| C | -3. 81322100 | 0. 94286700  | 4. 45907700  |
| C | -1. 81528800 | -1. 74981100 | 6. 05572300  |
| H | -1. 30192800 | -3. 66843700 | 5. 16841200  |
| H | -2. 42513000 | 0. 21727700  | 6. 63589600  |
| H | -3. 75730100 | 1. 70656000  | 5. 23322100  |
| H | -1. 26069000 | -1. 93952200 | 6. 97079400  |
| C | 0. 93407100  | -1. 80289300 | -3. 38502200 |
| C | 1. 56271100  | -0. 54440000 | -3. 56030800 |
| C | 1. 70484100  | -2. 93249300 | -3. 01072500 |
| C | 0. 84354200  | 0. 64561300  | -3. 90985800 |
| C | 2. 99281400  | -0. 42684100 | -3. 38018200 |
| C | 3. 12606700  | -2. 78794700 | -2. 79011200 |
| C | 1. 48900500  | 1. 83802000  | -4. 11836000 |
| H | -0. 23454700 | 0. 59357900  | -4. 00402200 |
| C | 3. 62906700  | 0. 83458100  | -3. 61275300 |
| C | 3. 73282600  | -1. 54489900 | -2. 98764400 |
| C | 2. 90372300  | 1. 93690600  | -3. 97849000 |
| H | 0. 91671500  | 2. 71916400  | -4. 39791500 |
| H | 4. 70951700  | 0. 89018600  | -3. 49881000 |
| H | 4. 80534000  | -1. 44279800 | -2. 83410000 |
| H | 3. 39985700  | 2. 88618300  | -4. 16232100 |
| C | -6. 01855800 | 1. 71887000  | 0. 95245000  |
| H | -6. 60029100 | 1. 92366600  | 0. 05837200  |
| C | -5. 42395300 | 0. 49489900  | 1. 11304300  |
| H | -5. 54998000 | -0. 26508500 | 0. 35089100  |
| C | -5. 88007000 | 2. 73122900  | 1. 94351100  |
| H | -6. 35538400 | 3. 69724400  | 1. 79666800  |
| C | -5. 15850500 | 2. 47825300  | 3. 07854600  |
| H | -5. 05879700 | 3. 23537000  | 3. 85348700  |
| C | 1. 91678000  | -5. 31142800 | -2. 49145700 |
| H | 1. 46159200  | -6. 29217800 | -2. 38265400 |
| C | 3. 31031600  | -5. 15583600 | -2. 24721900 |
| H | 3. 90451500  | -6. 01478200 | -1. 94762600 |
| C | 3. 89448900  | -3. 92816000 | -2. 39873200 |

|   |             |             |             |
|---|-------------|-------------|-------------|
| H | 4.95984400  | -3.79458500 | -2.22699900 |
| C | 1.14551900  | -4.24169700 | -2.86282200 |
| H | 0.08848700  | -4.38558300 | -3.05285400 |
| C | -0.86179900 | 4.19288800  | -0.14058800 |
| C | -1.19941300 | 3.69312300  | 1.34534100  |
| H | -1.64819600 | 4.55089600  | 1.86028500  |
| H | -1.99851600 | 2.95735000  | 1.24210900  |
| C | -0.16761400 | 3.05883500  | 2.25798600  |
| C | 0.30012300  | 3.37175500  | -0.81908200 |
| H | 1.15619700  | 4.02860500  | -0.94664400 |
| H | -0.01227300 | 3.04841900  | -1.81296900 |
| N | 0.81518200  | 2.16902300  | -0.15479600 |
| C | 2.10026500  | 2.01783000  | 0.21703500  |
| N | 2.58678200  | 0.77002100  | 0.31172800  |
| C | 3.92569800  | 0.42054600  | 0.66396700  |
| C | 4.97525900  | 0.80023200  | -0.16953500 |
| C | 4.16172800  | -0.38581200 | 1.77980100  |
| C | 6.27267100  | 0.37488400  | 0.11429700  |
| C | 5.46794800  | -0.79088000 | 2.06022800  |
| H | 3.33407800  | -0.70105200 | 2.40694500  |
| C | 6.52810400  | -0.41687900 | 1.23204800  |
| H | 7.53691000  | -0.74283600 | 1.45339900  |
| C | 5.72812400  | -1.69572600 | 3.23832300  |
| C | 7.36694400  | 0.75370600  | -0.84610000 |
| F | 5.58627400  | -2.99696100 | 2.90654600  |
| F | 4.87827100  | -1.44743200 | 4.25529700  |
| F | 6.98683400  | -1.54380900 | 3.71115200  |
| F | 7.09636700  | 0.28883700  | -2.09589000 |
| F | 8.56568500  | 0.25662300  | -0.48540000 |
| F | 7.49541300  | 2.09336600  | -0.95794700 |
| S | 3.03386700  | 3.39898000  | 0.72513200  |
| H | 4.76947500  | 1.39736700  | -1.05041500 |
| H | 1.98755800  | -0.04447100 | 0.10792800  |
| H | 0.28765800  | 1.30274400  | -0.37292400 |
| C | 0.88460600  | 3.75342500  | 2.87685000  |
| H | 1.74696700  | 3.64785000  | 1.83303000  |
| N | -0.86382300 | -1.81002800 | 1.08916200  |
| S | 0.64068500  | -2.13532200 | 1.45620100  |
| O | 1.00422500  | -1.64536700 | 2.79595800  |
| O | 1.61280100  | -1.85160400 | 0.36424700  |
| C | 0.66892200  | -3.99857100 | 1.60449800  |
| F | 0.30317700  | -4.56328800 | 0.45180800  |
| F | -0.17100200 | -4.40222900 | 2.56922700  |
| F | 1.90473700  | -4.39930700 | 1.91787000  |

|   |             |            |             |
|---|-------------|------------|-------------|
| C | -2.19725600 | 4.02735100 | -0.90178800 |
| C | -2.52667000 | 2.82010400 | -1.54048000 |
| C | -3.16553800 | 5.04371400 | -0.89088900 |
| C | -3.75614100 | 2.65553100 | -2.17995000 |
| H | -1.84738200 | 1.97348600 | -1.52365000 |
| C | -4.39537100 | 4.88005700 | -1.53061100 |
| H | -2.96755400 | 5.98244500 | -0.38797100 |
| C | -4.69371700 | 3.68784500 | -2.18904800 |
| H | -3.97646100 | 1.70703600 | -2.66212400 |
| H | -5.11809000 | 5.69201500 | -1.51395500 |
| H | -5.64798700 | 3.56232900 | -2.69414200 |
| C | -0.41226000 | 5.70429700 | -0.09732000 |
| H | -0.99217200 | 6.19909000 | 0.68059200  |
| H | 0.62630000  | 5.71219100 | 0.26131300  |
| C | -0.46799800 | 6.55840000 | -1.36491400 |
| C | -0.93933300 | 7.82677700 | -1.34797200 |
| C | -0.41896600 | 1.61424700 | 2.57631100  |
| H | 0.46998000  | 1.04102900 | 2.84338800  |
| H | -1.08141500 | 1.57815600 | 3.45709200  |
| H | -0.94278800 | 1.09421700 | 1.77409300  |
| C | 0.12507000  | 5.92565400 | -2.60466600 |
| H | 0.09837600  | 6.57908100 | -3.47598100 |
| H | 1.17333800  | 5.63926800 | -2.44484800 |
| H | -0.42055400 | 5.01399700 | -2.87587300 |
| C | 1.69100000  | 3.06976900 | 3.98650500  |
| H | 2.56971500  | 3.67564800 | 4.22822000  |
| H | 1.08905600  | 2.97401100 | 4.89880500  |
| H | 2.04624000  | 2.07455600 | 3.71200400  |
| C | -0.92774200 | 8.76287700 | -2.53992600 |
| H | -1.95389000 | 8.96524400 | -2.87879200 |
| H | -0.50273400 | 9.73388800 | -2.25111700 |
| H | -0.36115200 | 8.40324900 | -3.39878300 |
| C | -1.53899200 | 8.52415300 | -0.14191300 |
| H | -0.84945200 | 9.28893400 | 0.24354800  |
| H | -2.45432700 | 9.05647100 | -0.43320800 |
| H | -1.79585500 | 7.87065900 | 0.69395400  |
| C | 0.84517400  | 5.26980900 | 3.07787000  |
| H | 1.83902700  | 5.70831000 | 2.93119600  |
| H | 0.14964100  | 5.78378900 | 2.41885400  |
| H | 0.54986200  | 5.47958000 | 4.11396100  |

TS-EF-7RR-8

l imaginary frequency

H = -5472.469623



G = -5472.685049

E(M06-2X-DCM) = -5473.446772

|   |             |             |             |
|---|-------------|-------------|-------------|
| O | -1.82650500 | -2.08668100 | -1.40927000 |
| O | -3.22623600 | -0.27863900 | -0.18498800 |
| P | -1.69902400 | -0.83390500 | -0.35850500 |
| O | -0.89946900 | 0.31441500  | -0.89881200 |
| C | -2.90468600 | -1.02500500 | -5.30872600 |
| C | -3.87515600 | -1.19778700 | -4.32667100 |
| C | -3.51979000 | -1.64741000 | -3.04644800 |
| C | -1.17007900 | -1.68422600 | -3.71075500 |
| C | -1.57206600 | -1.30715800 | -5.00363700 |
| C | -4.26032500 | -1.12308900 | 0.21770900  |
| C | -4.87557800 | -1.94815400 | -0.72455000 |
| C | -5.82597200 | -2.88635800 | -0.29038900 |
| C | -6.23094900 | -2.92802400 | 1.03911500  |
| C | -5.68350900 | -2.01768400 | 1.94186900  |
| C | -4.68543100 | -1.10538100 | 1.56111400  |
| H | -0.81143100 | -1.21586400 | -5.77357300 |
| H | -6.01599400 | -2.01416400 | 2.97571300  |
| C | -4.77411200 | -1.98761400 | -2.24898900 |
| C | -5.79849000 | -1.01396600 | -2.92323500 |
| H | -5.69134700 | -0.02160800 | -2.46960500 |
| H | -6.83558700 | -1.33436100 | -2.78277000 |
| H | -7.27868300 | -3.49487500 | -1.78084600 |
| H | -6.30878300 | -4.82723500 | -1.16139400 |
| C | -2.17306900 | -1.80350200 | -2.72936800 |
| H | -3.17558300 | -0.68774800 | -6.30616100 |
| H | -6.97020700 | -3.65175400 | 1.37300500  |
| C | -5.36830600 | -0.95978800 | -4.40713200 |
| H | -5.61579400 | -0.00419400 | -4.88377000 |
| H | -5.86624300 | -1.74216600 | -4.99680100 |
| C | -6.27075100 | -3.76714100 | -1.43691800 |
| C | -5.20842600 | -3.46959300 | -2.51505600 |
| H | -4.33937700 | -4.12065800 | -2.36624500 |
| H | -5.56861700 | -3.62197500 | -3.53719500 |
| C | -4.17363200 | -0.13435100 | 2.57995500  |
| C | -3.46046300 | -0.60231200 | 3.71062300  |
| C | -4.50502400 | 1.23957800  | 2.46656500  |
| C | -3.05827900 | -1.96814000 | 3.86143200  |
| C | -3.09572300 | 0.32286700  | 4.76051000  |
| C | -4.10667100 | 2.15916000  | 3.50906600  |
| C | -2.37839200 | -2.39243200 | 4.97214600  |
| H | -3.26484300 | -2.66453700 | 3.05909600  |
| C | -2.40053400 | -0.16503000 | 5.91177300  |

|   |             |             |             |
|---|-------------|-------------|-------------|
| C | -3.42437500 | 1.67531400  | 4.62948100  |
| C | -2.05552800 | -1.48449600 | 6.02012400  |
| H | -2.06124400 | -3.42848200 | 5.04454900  |
| H | -2.14801100 | 0.54251200  | 6.69855600  |
| H | -3.15253900 | 2.36751100  | 5.42480000  |
| H | -1.52102500 | -1.84221600 | 6.89603000  |
| C | 0.26874200  | -1.98621900 | -3.43190200 |
| C | 1.24840200  | -0.97061000 | -3.55476000 |
| C | 0.65879800  | -3.31304900 | -3.11870700 |
| C | 0.92390700  | 0.39081300  | -3.86335400 |
| C | 2.64517700  | -1.29549700 | -3.36498300 |
| C | 2.05447200  | -3.61460200 | -2.89767600 |
| C | 1.90091000  | 1.33991700  | -4.02177200 |
| H | -0.11887000 | 0.66685300  | -3.96649200 |
| C | 3.63336500  | -0.27324000 | -3.53147400 |
| C | 3.00758300  | -2.60182000 | -3.02969500 |
| C | 3.27709300  | 1.00736000  | -3.86035600 |
| H | 1.62396000  | 2.36010700  | -4.27381600 |
| H | 4.67882900  | -0.54059200 | -3.39308500 |
| H | 4.05859900  | -2.83911500 | -2.87782200 |
| H | 4.03676000  | 1.77241300  | -3.99764700 |
| C | -5.55805200 | 3.10669000  | 1.28843500  |
| H | -6.12513800 | 3.48205000  | 0.44118700  |
| C | -5.25519400 | 1.77259800  | 1.36905500  |
| H | -5.59277700 | 1.09848700  | 0.59033600  |
| C | -5.13944200 | 4.01119100  | 2.30495400  |
| H | -5.38542600 | 5.06629600  | 2.22190600  |
| C | -4.43955000 | 3.54484500  | 3.38457700  |
| H | -4.12789100 | 4.22084600  | 4.17796600  |
| C | 0.13988400  | -5.66967100 | -2.72787000 |
| H | -0.59013900 | -6.47266400 | -2.67038300 |
| C | 1.51284700  | -5.95351700 | -2.48284000 |
| H | 1.81820500  | -6.96592500 | -2.23299500 |
| C | 2.44047200  | -4.95178100 | -2.57113300 |
| H | 3.49460200  | -5.15380400 | -2.39679900 |
| C | -0.27005800 | -4.39908300 | -3.03613200 |
| H | -1.31939600 | -4.20794000 | -3.22809900 |
| C | 0.13445400  | 4.27576900  | -0.05782200 |
| C | -0.31395200 | 3.83040400  | 1.41474500  |
| H | -0.52557000 | 4.76506800  | 1.94866400  |
| H | -1.27448400 | 3.32489100  | 1.30750800  |
| C | 0.53809000  | 2.93519900  | 2.29173000  |
| C | 0.89906900  | 3.14914300  | -0.85828200 |
| H | 1.82193500  | 3.57990400  | -1.24550900 |

|   |             |             |             |
|---|-------------|-------------|-------------|
| H | 0.29809400  | 2.83490700  | -1.71109000 |
| N | 1.25029800  | 1.89347400  | -0.18101500 |
| C | 2.49590400  | 1.51468500  | 0.15168400  |
| N | 2.74399100  | 0.19583800  | 0.24184000  |
| C | 3.97980400  | -0.40679400 | 0.61613300  |
| C | 5.13571700  | -0.15464500 | -0.12353700 |
| C | 4.00008800  | -1.32135100 | 1.67219700  |
| C | 6.32286400  | -0.80606900 | 0.20733300  |
| C | 5.19735800  | -1.96552900 | 1.99167700  |
| H | 3.09163000  | -1.52782500 | 2.22956600  |
| C | 6.36242700  | -1.71119700 | 1.26769700  |
| H | 7.28556000  | -2.21808500 | 1.52094600  |
| C | 5.21474700  | -2.99050600 | 3.09778100  |
| C | 7.56448200  | -0.50233500 | -0.58840000 |
| F | 4.85468900  | -4.21201100 | 2.64750000  |
| F | 4.36464300  | -2.66513000 | 4.09237500  |
| F | 6.44821000  | -3.11655800 | 3.63891600  |
| F | 7.28170400  | -0.36067500 | -1.90654900 |
| F | 8.48990400  | -1.47750800 | -0.47483300 |
| F | 8.14720400  | 0.65000800  | -0.19026500 |
| S | 3.67143100  | 2.70962100  | 0.62327600  |
| H | 5.09584200  | 0.52121300  | -0.96896800 |
| H | 1.98545500  | -0.48289200 | 0.06464800  |
| H | 0.55602100  | 1.14533400  | -0.36190200 |
| C | 1.72945700  | 3.33448700  | 2.91862500  |
| H | 2.51574600  | 3.13574900  | 1.81386100  |
| N | -1.31010400 | -1.50860900 | 1.05829000  |
| S | 0.09720700  | -2.16975400 | 1.34802900  |
| O | 0.60921700  | -1.82596400 | 2.68498400  |
| O | 1.07324800  | -2.06105800 | 0.22640600  |
| C | -0.27537700 | -3.99968400 | 1.43908900  |
| F | -0.79475300 | -4.42845700 | 0.28776300  |
| F | -1.14879400 | -4.24588400 | 2.42647000  |
| F | 0.85422700  | -4.66869500 | 1.68935000  |
| C | -1.20851500 | 4.63862600  | -0.73367200 |
| C | -2.07868700 | 3.61854300  | -1.15739700 |
| C | -1.63810300 | 5.96629800  | -0.87068600 |
| C | -3.31885800 | 3.91981600  | -1.71884300 |
| H | -1.80084400 | 2.57263300  | -1.04749800 |
| C | -2.88120500 | 6.26798800  | -1.43197400 |
| H | -0.99364800 | 6.78514200  | -0.57128000 |
| C | -3.72702000 | 5.24699100  | -1.86181200 |
| H | -3.96619300 | 3.10773000  | -2.03789400 |
| H | -3.18187100 | 7.30747500  | -1.53577100 |

|   |             |            |             |
|---|-------------|------------|-------------|
| H | -4.69225000 | 5.48216000 | -2.30259400 |
| C | 1.09005300  | 5.49347800 | 0.08323200  |
| H | 0.58648300  | 6.24055200 | 0.71302600  |
| H | 1.92370500  | 5.13652400 | 0.69670500  |
| C | 1.78538700  | 6.27699600 | -1.03853500 |
| C | 1.70863000  | 6.22937300 | -2.38562600 |
| C | -0.04827200 | 1.58131700 | 2.55673000  |
| H | 0.67409700  | 0.80411500 | 2.80779900  |
| H | -0.70773200 | 1.67961900 | 3.43564100  |
| H | -0.67588000 | 1.22761800 | 1.73928200  |
| C | 2.77371700  | 7.24670000 | -0.39272500 |
| H | 3.78130100  | 6.81091700 | -0.32842800 |
| H | 2.85884700  | 8.18901600 | -0.94014100 |
| H | 2.47270800  | 7.49508900 | 0.63128900  |
| C | 2.40136600  | 2.40009100 | 3.92985800  |
| H | 3.39637700  | 2.78285700 | 4.17744400  |
| H | 1.82074700  | 2.35184400 | 4.85958100  |
| H | 2.52690100  | 1.38080100 | 3.55876200  |
| C | 2.61336500  | 7.11589100 | -3.23413800 |
| H | 3.63839600  | 7.16823200 | -2.85487000 |
| H | 2.66378200  | 6.73964500 | -4.26138500 |
| H | 2.23356000  | 8.14620400 | -3.29265200 |
| C | 0.79974400  | 5.38611000 | -3.24609500 |
| H | 0.25960100  | 6.03267300 | -3.95196400 |
| H | 1.39312700  | 4.69362200 | -3.86034300 |
| H | 0.05216400  | 4.81524400 | -2.70548300 |
| C | 2.02043200  | 4.80185800 | 3.25206400  |
| H | 3.05549400  | 5.06877600 | 3.00829000  |
| H | 1.35983900  | 5.50837600 | 2.75260100  |
| H | 1.90031900  | 4.93752400 | 4.33428300  |

TS-EF-7RR-9

l imaginary frequency

H = -5472.469794

G = -5472.684975

E(M06-2X-DCM) = -5473.449508

|   |             |             |             |
|---|-------------|-------------|-------------|
| O | -0.22562100 | -2.88499500 | -0.97721800 |
| O | -2.38190700 | -1.72692200 | -0.12778700 |
| P | -0.74648200 | -1.56425800 | -0.15630500 |
| O | -0.44533900 | -0.28497100 | -0.87436600 |
| C | -1.46196700 | -3.24430100 | -4.96222300 |
| C | -2.26702400 | -3.69832200 | -3.92250200 |
| C | -1.81563000 | -3.64199000 | -2.59597200 |
| C | 0.25574900  | -2.58792300 | -3.34252300 |

|   |             |             |             |
|---|-------------|-------------|-------------|
| C | -0.20219200 | -2.72512500 | -4.66524100 |
| C | -2.95540900 | -2.84480500 | 0.48444600  |
| C | -3.01231300 | -4.05477600 | -0.20937100 |
| C | -3.42730100 | -5.21249100 | 0.46854400  |
| C | -3.89097500 | -5.14370700 | 1.77722800  |
| C | -3.94822100 | -3.90220100 | 2.40823000  |
| C | -3.47631400 | -2.73248400 | 1.78933700  |
| H | 0.44697900  | -2.39312200 | -5.47003900 |
| H | -4.34714100 | -3.82527500 | 3.41532800  |
| C | -2.78292400 | -4.38526000 | -1.68325400 |
| C | -4.10822200 | -4.23635300 | -2.50656400 |
| H | -4.55238200 | -3.25819600 | -2.28644800 |
| H | -4.84805900 | -5.00094600 | -2.25022000 |
| H | -4.24841000 | -6.79210800 | -0.77147300 |
| H | -2.80527600 | -7.27218400 | 0.11479400  |
| C | -0.59508400 | -3.03302700 | -2.31239700 |
| H | -1.80093200 | -3.29706300 | -5.99387500 |
| H | -4.21637200 | -6.03903500 | 2.30090100  |
| C | -3.66068700 | -4.28478400 | -3.98399700 |
| H | -4.32688200 | -3.72077800 | -4.64710300 |
| H | -3.64216700 | -5.31666700 | -4.36205000 |
| C | -3.27353600 | -6.43315100 | -0.41239200 |
| C | -2.40625100 | -5.90058000 | -1.57266200 |
| H | -1.34551400 | -5.97974500 | -1.30887500 |
| H | -2.55822800 | -6.43835700 | -2.51378800 |
| C | -3.61688000 | -1.43624900 | 2.52628900  |
| C | -2.90562200 | -1.22479100 | 3.73288600  |
| C | -4.56606400 | -0.47985500 | 2.08380600  |
| C | -1.90392100 | -2.13081300 | 4.20759000  |
| C | -3.17398400 | -0.04541000 | 4.52602900  |
| C | -4.80372900 | 0.70925000  | 2.87206700  |
| C | -1.23893900 | -1.90433900 | 5.38324400  |
| H | -1.64245300 | -2.98529000 | 3.59772600  |
| C | -2.46996200 | 0.14341700  | 5.75703100  |
| C | -4.11185400 | 0.88792300  | 4.07414500  |
| C | -1.53290200 | -0.76042000 | 6.17813600  |
| H | -0.46050200 | -2.59206200 | 5.69949700  |
| H | -2.69513100 | 1.02823400  | 6.34846600  |
| H | -4.31699500 | 1.77026700  | 4.67828300  |
| H | -0.99842700 | -0.60221600 | 7.11098900  |
| C | 1.61484200  | -2.01279100 | -3.09951800 |
| C | 1.90060300  | -0.68735500 | -3.51367100 |
| C | 2.64098800  | -2.81959700 | -2.54700800 |
| C | 0.90113000  | 0.20000400  | -4.03287700 |

|   |             |             |             |
|---|-------------|-------------|-------------|
| C | 3.25057600  | -0.18038100 | -3.40847000 |
| C | 3.97385600  | -2.27971500 | -2.40188500 |
| C | 1.22040200  | 1.46111900  | -4.46866800 |
| H | -0.12879800 | -0.13470900 | -4.06615700 |
| C | 3.54369000  | 1.13832300  | -3.88343900 |
| C | 4.24661200  | -0.98337500 | -2.84628800 |
| C | 2.56204100  | 1.93721000  | -4.40655400 |
| H | 0.44101900  | 2.10427400  | -4.87015600 |
| H | 4.57212300  | 1.48717100  | -3.82133400 |
| H | 5.25450200  | -0.58646900 | -2.74670000 |
| H | 2.79982000  | 2.93312700  | -4.77099000 |
| C | -6.25551600 | 0.29499200  | 0.49206000  |
| H | -6.82677300 | 0.14088900  | -0.41916900 |
| C | -5.34377100 | -0.64679900 | 0.89257800  |
| H | -5.20798700 | -1.54552700 | 0.30217900  |
| C | -6.46798300 | 1.47436400  | 1.26075700  |
| H | -7.19813700 | 2.20851200  | 0.93110300  |
| C | -5.76341000 | 1.66861700  | 2.41870700  |
| H | -5.92963000 | 2.55515200  | 3.02707400  |
| C | 3.44309100  | -4.92369800 | -1.59719000 |
| H | 3.25110400  | -5.94848100 | -1.29085200 |
| C | 4.74639200  | -4.37611100 | -1.43057400 |
| H | 5.53432200  | -4.98313400 | -0.99317600 |
| C | 5.00098400  | -3.09246000 | -1.82871300 |
| H | 5.99377000  | -2.66281400 | -1.71878900 |
| C | 2.43159900  | -4.17586100 | -2.13976100 |
| H | 1.45009800  | -4.61691300 | -2.26626300 |
| C | -1.88007600 | 3.81203300  | -1.14635500 |
| C | -2.20759900 | 3.66244000  | 0.40981900  |
| H | -2.70901200 | 4.58636700  | 0.70800000  |
| H | -2.94635700 | 2.86642100  | 0.51770100  |
| C | -1.12533000 | 3.36568000  | 1.42668900  |
| C | -0.38117100 | 3.48282200  | -1.51163400 |
| H | 0.22601600  | 4.37824700  | -1.38808800 |
| H | -0.35434500 | 3.20754900  | -2.57144200 |
| N | 0.30279400  | 2.42488200  | -0.76856200 |
| C | 1.54979800  | 2.56244700  | -0.27153800 |
| N | 2.25994600  | 1.45373500  | -0.00927500 |
| C | 3.61768100  | 1.45934300  | 0.45122400  |
| C | 4.62378500  | 1.84039200  | -0.43370200 |
| C | 3.93219600  | 1.02241700  | 1.73793900  |
| C | 5.95778600  | 1.78803400  | -0.02986200 |
| C | 5.27114000  | 0.98404300  | 2.13247200  |
| H | 3.14606600  | 0.69916000  | 2.41189500  |

|   |             |             |             |
|---|-------------|-------------|-------------|
| C | 6.28858700  | 1.36314600  | 1.25582500  |
| H | 7.32408700  | 1.32226500  | 1.56986000  |
| C | 5.61311300  | 0.47095700  | 3.50852900  |
| C | 7.02052700  | 2.19670700  | -1.01288000 |
| F | 5.59482400  | -0.87740800 | 3.55600800  |
| F | 4.73589900  | 0.91373000  | 4.43374700  |
| F | 6.84767800  | 0.86632800  | 3.89692100  |
| F | 6.85270900  | 1.56751300  | -2.20786900 |
| F | 8.26232400  | 1.90506700  | -0.57883200 |
| F | 6.98252000  | 3.52177100  | -1.27366500 |
| S | 2.16869800  | 4.13141900  | 0.16553300  |
| H | 4.35968100  | 2.15400300  | -1.43717300 |
| H | 1.85163100  | 0.52357100  | -0.15809900 |
| H | -0.01512600 | 1.45405100  | -0.92582600 |
| C | -0.29092300 | 4.35889500  | 1.97705800  |
| H | 0.69315200  | 4.25873900  | 1.09064800  |
| N | -0.27504600 | -1.78128200 | 1.37027500  |
| S | 1.23678400  | -1.61048200 | 1.81883600  |
| O | 1.36426500  | -0.77770000 | 3.02735700  |
| O | 2.17543500  | -1.32039600 | 0.70626900  |
| C | 1.70124400  | -3.33190000 | 2.37561000  |
| F | 1.58652700  | -4.19411600 | 1.36228000  |
| F | 0.90295200  | -3.73412100 | 3.37729700  |
| F | 2.96499000  | -3.33268100 | 2.81067400  |
| C | -2.76238400 | 2.88383600  | -2.01542100 |
| C | -2.92876600 | 1.53244400  | -1.68281700 |
| C | -3.32837900 | 3.32818600  | -3.22315300 |
| C | -3.62277800 | 0.65634300  | -2.51851000 |
| H | -2.49883800 | 1.12528900  | -0.77661800 |
| C | -4.03197000 | 2.45760700  | -4.05643100 |
| H | -3.25381500 | 4.36879200  | -3.51638400 |
| C | -4.17958500 | 1.11430200  | -3.71129700 |
| H | -3.70779000 | -0.38538500 | -2.22612900 |
| H | -4.46623400 | 2.83719600  | -4.97789900 |
| H | -4.72159900 | 0.43521500  | -4.36406400 |
| C | -2.00361000 | 5.31001100  | -1.56347500 |
| H | -1.18927400 | 5.82979700  | -1.03991600 |
| H | -1.69693500 | 5.37535400  | -2.61753200 |
| C | -3.21052000 | 6.23888400  | -1.39434600 |
| C | -4.46877300 | 6.02688100  | -0.95133500 |
| C | -1.08094700 | 1.96141900  | 1.94636600  |
| H | -0.10160900 | 1.64180400  | 2.30748000  |
| H | -1.76058500 | 1.90126700  | 2.81227000  |
| H | -1.43515700 | 1.23340400  | 1.21683000  |

|   |             |            |             |
|---|-------------|------------|-------------|
| C | -2.78416500 | 7.65395800 | -1.78972800 |
| H | -3.56417100 | 8.18732500 | -2.33983200 |
| H | -2.52461700 | 8.26537800 | -0.91348300 |
| H | -1.89642800 | 7.63284600 | -2.43086900 |
| C | 0.47319000  | 4.06348000 | 3.27417000  |
| H | 1.21640300  | 4.84711000 | 3.44944600  |
| H | -0.21466800 | 4.05532700 | 4.12887900  |
| H | 1.00174600  | 3.10880300 | 3.25854700  |
| C | -5.44489100 | 7.18484400 | -0.80530200 |
| H | -6.05670600 | 7.30518100 | -1.71161100 |
| H | -6.14344000 | 6.98731200 | 0.01639300  |
| H | -4.96311500 | 8.14382400 | -0.60215200 |
| C | -5.11859800 | 4.71855400 | -0.56734300 |
| H | -5.33277100 | 4.69106100 | 0.51063400  |
| H | -6.09092700 | 4.63638000 | -1.07298900 |
| H | -4.55167300 | 3.83029800 | -0.82655600 |
| C | -0.63957800 | 5.84537700 | 1.86267600  |
| H | 0.27575000  | 6.44696500 | 1.84668000  |
| H | -1.22137100 | 6.09636200 | 0.97689200  |
| H | -1.21616000 | 6.15382600 | 2.74427600  |

TS-1-1-7SS

l imaginary frequency

H = -5472.465669

G = -5472.676918

E(M06-2X-DCM) = -5473.443208

|   |             |            |             |
|---|-------------|------------|-------------|
| C | -3.44005500 | 2.16587100 | 1.96348700  |
| C | -3.00350900 | 1.29473600 | 3.22446700  |
| H | -3.87260300 | 0.69998200 | 3.49943300  |
| H | -2.84580200 | 2.02129600 | 4.03390800  |
| C | -1.78022500 | 0.42390100 | 3.25248000  |
| C | -2.35845900 | 3.20805700 | 1.59369600  |
| H | -2.78745800 | 3.95006800 | 0.91832700  |
| H | -2.06437100 | 3.76147700 | 2.49395000  |
| N | -1.15287900 | 2.68227200 | 0.96720600  |
| C | -0.10891700 | 3.49563600 | 0.63658500  |
| N | 0.96675800  | 2.79233800 | 0.14650900  |
| C | 2.19692600  | 3.23620900 | -0.36056400 |
| C | 2.84763400  | 4.41193700 | 0.04232100  |
| C | 2.82495000  | 2.39997700 | -1.30047100 |
| C | 4.08813300  | 4.73986200 | -0.50765200 |
| C | 4.06072300  | 2.74821100 | -1.83992600 |
| H | 2.32087400  | 1.49743600 | -1.62955000 |
| C | 4.70570600  | 3.92416300 | -1.45291900 |



|   |              |              |              |
|---|--------------|--------------|--------------|
| H | 5. 65787500  | 4. 20315600  | -1. 88672300 |
| C | 4. 72699900  | 1. 83790700  | -2. 83367400 |
| C | 4. 79594200  | 5. 97229100  | -0. 00562600 |
| F | 3. 82628400  | 1. 10832900  | -3. 54259100 |
| F | 5. 47712200  | 2. 51983300  | -3. 72289700 |
| F | 5. 55327400  | 0. 94526700  | -2. 23131200 |
| F | 5. 72826800  | 6. 41142300  | -0. 88011100 |
| F | 3. 94064300  | 6. 98873400  | 0. 22374200  |
| F | 5. 43687800  | 5. 72704400  | 1. 16341000  |
| S | -0. 19575900 | 5. 16966200  | 0. 82338300  |
| H | 2. 37589200  | 5. 06873600  | 0. 75902900  |
| C | -1. 85400200 | -0. 98500900 | 3. 21948100  |
| H | 0. 84106000  | 1. 77822600  | 0. 09419600  |
| H | -1. 02545900 | 1. 68162900  | 0. 85227300  |
| H | -1. 61593600 | -1. 23032700 | 1. 93967500  |
| O | 1. 27216600  | -2. 46749600 | 0. 38849100  |
| O | 0. 24068300  | -1. 07700800 | -1. 57188200 |
| P | 0. 18352200  | -1. 31202500 | 0. 03311500  |
| O | 0. 45198800  | 0. 02183300  | 0. 65608400  |
| C | 5. 34580800  | -1. 66872900 | -0. 25915700 |
| C | 4. 53356500  | -2. 10167300 | -1. 29965200 |
| C | 3. 18724300  | -2. 43409800 | -1. 07253200 |
| C | 3. 45617800  | -1. 86321300 | 1. 28459400  |
| C | 4. 81002300  | -1. 58781500 | 1. 02293300  |
| C | 0. 16081600  | -2. 00724000 | -2. 62420000 |
| C | 1. 14201700  | -2. 98570400 | -2. 77917900 |
| C | 0. 89885800  | -4. 05087000 | -3. 66296700 |
| C | -0. 20029100 | -4. 03267000 | -4. 51157900 |
| C | -1. 04296100 | -2. 92450000 | -4. 49096700 |
| C | -0. 90190100 | -1. 89463400 | -3. 54413400 |
| H | 5. 44156700  | -1. 29256600 | 1. 85529800  |
| H | -1. 85393500 | -2. 85134200 | -5. 20810200 |
| C | 2. 59739600  | -3. 06945400 | -2. 32357600 |
| C | 3. 51219500  | -2. 41401700 | -3. 41925700 |
| H | 3. 52436000  | -2. 98898900 | -4. 34918200 |
| H | 3. 12719500  | -1. 41494900 | -3. 64995500 |
| H | 2. 60315100  | -5. 13544500 | -4. 46381600 |
| H | 1. 57509500  | -6. 10480800 | -3. 41579200 |
| C | 2. 64644600  | -2. 24076900 | 0. 19563000  |
| H | 6. 38532400  | -1. 40767700 | -0. 43683900 |
| H | -0. 37968700 | -4. 84491000 | -5. 21129200 |
| C | 4. 89479600  | -2. 28199000 | -2. 75482300 |
| H | 5. 47256100  | -1. 43815100 | -3. 14315100 |
| H | 5. 50287300  | -3. 18547200 | -2. 90218800 |

|   |              |              |              |
|---|--------------|--------------|--------------|
| C | 1. 98665500  | -5. 09845900 | -3. 55538700 |
| C | 2. 80289400  | -4. 61866500 | -2. 33521600 |
| H | 2. 38070100  | -5. 03666400 | -1. 41387300 |
| H | 3. 85943800  | -4. 90035100 | -2. 37995400 |
| C | -1. 82358800 | -0. 72111300 | -3. 64660500 |
| C | -3. 22926000 | -0. 92405400 | -3. 64494000 |
| C | -1. 29406100 | 0. 56461000  | -3. 94079600 |
| C | -3. 83616800 | -2. 18331900 | -3. 32532600 |
| C | -4. 10957500 | 0. 16836200  | -3. 99256500 |
| C | -2. 19475900 | 1. 66360900  | -4. 20969200 |
| C | -5. 19249200 | -2. 36406200 | -3. 41176800 |
| H | -3. 20754100 | -2. 99708700 | -2. 98801700 |
| C | -5. 51638700 | -0. 06890400 | -4. 09012900 |
| C | -3. 57191400 | 1. 43175500  | -4. 24691300 |
| C | -6. 04688100 | -1. 30173100 | -3. 82143700 |
| H | -5. 62183800 | -3. 32954600 | -3. 15833500 |
| H | -6. 15535600 | 0. 75836900  | -4. 38948300 |
| H | -4. 24044300 | 2. 25299200  | -4. 49746600 |
| H | -7. 11699500 | -1. 47132000 | -3. 90830200 |
| C | 3. 01370400  | -1. 80386800 | 2. 71296200  |
| C | 3. 05044800  | -0. 56788100 | 3. 40571700  |
| C | 2. 72823000  | -3. 00403600 | 3. 41218100  |
| C | 3. 29382000  | 0. 68200800  | 2. 74720200  |
| C | 2. 82992900  | -0. 54096500 | 4. 83477700  |
| C | 2. 49230300  | -2. 95899100 | 4. 83837700  |
| C | 3. 33978300  | 1. 86070800  | 3. 44620400  |
| H | 3. 42932300  | 0. 68840100  | 1. 67212400  |
| C | 2. 89174500  | 0. 71008900  | 5. 52692200  |
| C | 2. 56196500  | -1. 73472100 | 5. 51032400  |
| C | 3. 14393100  | 1. 87759900  | 4. 85713800  |
| H | 3. 52259200  | 2. 79289800  | 2. 91907600  |
| H | 2. 73692300  | 0. 71019700  | 6. 60354200  |
| H | 2. 40450500  | -1. 71153400 | 6. 58699500  |
| H | 3. 19161100  | 2. 82050000  | 5. 39484200  |
| C | 0. 58337500  | 2. 08992600  | -4. 32546900 |
| H | 1. 65457400  | 2. 25108000  | -4. 39621100 |
| C | 0. 10891100  | 0. 83487500  | -4. 04379500 |
| H | 0. 81326100  | 0. 02237000  | -3. 91379400 |
| C | -0. 31070700 | 3. 17776000  | -4. 53138600 |
| H | 0. 08277600  | 4. 16868100  | -4. 73948100 |
| C | -1. 66068600 | 2. 96243700  | -4. 48274600 |
| H | -2. 35932100 | 3. 77646000  | -4. 66097900 |
| C | 2. 40497600  | -5. 42589800 | 3. 48186900  |
| H | 2. 37476000  | -6. 38371300 | 2. 96974400  |

|   |              |              |              |
|---|--------------|--------------|--------------|
| C | 2. 15748600  | -5. 37289600 | 4. 88294300  |
| H | 1. 93779400  | -6. 28783400 | 5. 42619300  |
| C | 2. 20583500  | -4. 17274200 | 5. 53872600  |
| H | 2. 02893400  | -4. 11817400 | 6. 61036300  |
| C | 2. 68616800  | -4. 28580600 | 2. 77515600  |
| H | 2. 88239600  | -4. 35041100 | 1. 71153400  |
| N | -1. 23349900 | -1. 91214400 | 0. 65459700  |
| S | -2. 08737500 | -3. 22387900 | 0. 18598600  |
| C | -1. 43483400 | -4. 69594600 | 1. 15906300  |
| O | -3. 46286800 | -3. 05981200 | 0. 65548600  |
| O | -1. 79943900 | -3. 60905100 | -1. 19660200 |
| F | -2. 08638000 | -5. 78131400 | 0. 73660900  |
| F | -1. 66054800 | -4. 55376800 | 2. 47608800  |
| F | -0. 12735200 | -4. 86452900 | 0. 96158200  |
| C | -0. 47398600 | 1. 10219300  | 3. 52241600  |
| H | 0. 31439100  | 0. 75492100  | 2. 84913600  |
| H | -0. 54489400 | 2. 18762200  | 3. 46110000  |
| H | -0. 14954700 | 0. 83448600  | 4. 53930900  |
| C | -0. 67593700 | -1. 74657900 | 3. 84283300  |
| H | -0. 69140400 | -1. 63083800 | 4. 93441500  |
| H | -0. 74883100 | -2. 80945200 | 3. 61837500  |
| H | 0. 28924600  | -1. 39531400 | 3. 48041000  |
| C | -4. 69313800 | 2. 91686900  | 2. 48446400  |
| C | -5. 85334500 | 2. 18728200  | 2. 79660200  |
| C | -4. 71992900 | 4. 30016700  | 2. 71758100  |
| C | -6. 98851700 | 2. 80597900  | 3. 31464500  |
| H | -5. 88026700 | 1. 11557100  | 2. 62733700  |
| C | -5. 85915900 | 4. 92540400  | 3. 23446700  |
| H | -3. 85879200 | 4. 92136900  | 2. 50040300  |
| C | -6. 99810800 | 4. 18427000  | 3. 53675400  |
| H | -7. 86801000 | 2. 20875400  | 3. 54078900  |
| H | -5. 84498700 | 5. 99936500  | 3. 39993400  |
| H | -7. 88206300 | 4. 67116000  | 3. 93944700  |
| C | -3. 80307300 | 1. 21274200  | 0. 75833600  |
| H | -4. 12970500 | 0. 25969300  | 1. 17220100  |
| H | -2. 87993500 | 0. 98771500  | 0. 20739500  |
| C | -4. 84859000 | 1. 73547100  | -0. 21536800 |
| C | -6. 02158500 | 1. 10024100  | -0. 43007800 |
| C | -4. 47052300 | 3. 01801700  | -0. 93046100 |
| H | -3. 40092300 | 3. 02134100  | -1. 17033200 |
| H | -5. 00444900 | 3. 14385300  | -1. 87390900 |
| H | -4. 66968300 | 3. 90927100  | -0. 31985600 |
| C | -7. 13649300 | 1. 67589900  | -1. 27589200 |
| H | -6. 95078300 | 2. 69129700  | -1. 62883800 |

|   |             |             |             |
|---|-------------|-------------|-------------|
| H | -7.33966300 | 1.03850600  | -2.14588600 |
| H | -8.06376300 | 1.70282900  | -0.68578200 |
| C | -3.20807000 | -1.67045900 | 3.46507600  |
| H | -3.53165200 | -1.49968300 | 4.50036200  |
| H | -3.99535100 | -1.33221600 | 2.79079000  |
| H | -3.11096200 | -2.74553300 | 3.31753100  |
| C | -6.40748700 | -0.24411000 | 0.15180200  |
| H | -6.88922600 | -0.85002600 | -0.62576700 |
| H | -5.57091100 | -0.83632600 | 0.52805100  |
| H | -7.14741600 | -0.13400300 | 0.95892200  |

TS-1-1-7SS-1

l imaginary frequency

H = -5472.460797

G = -5472.672902

E(M06-2X-DCM) = -5473.441397

|   |             |             |             |
|---|-------------|-------------|-------------|
| C | 3.94945300  | 0.84878500  | -2.14988000 |
| C | 3.46206200  | -0.38387400 | -3.02915500 |
| H | 4.17046900  | -1.18745800 | -2.84896700 |
| H | 3.61872500  | -0.06173200 | -4.07183300 |
| C | 2.07864300  | -0.96521000 | -3.08872500 |
| C | 3.05358700  | 2.09593900  | -2.30235000 |
| H | 3.54385700  | 2.93254900  | -1.79794200 |
| H | 2.97894000  | 2.37699000  | -3.36027300 |
| N | 1.71418700  | 1.97075100  | -1.74764100 |
| C | 0.88565400  | 3.04061200  | -1.61187600 |
| N | -0.26876300 | 2.72524700  | -0.92895600 |
| C | -1.24500100 | 3.57976900  | -0.38600400 |
| C | -1.72637400 | 4.72775400  | -1.02869100 |
| C | -1.78093400 | 3.21741000  | 0.86178600  |
| C | -2.71212200 | 5.50318800  | -0.41379900 |
| C | -2.76265500 | 4.00324900  | 1.45755800  |
| H | -1.40136400 | 2.33891900  | 1.37293800  |
| C | -3.23618600 | 5.15701700  | 0.82874300  |
| H | -3.98870600 | 5.77682500  | 1.30243100  |
| C | -3.31775900 | 3.64847500  | 2.80865300  |
| C | -3.26629400 | 6.69667900  | -1.14900600 |
| F | -2.72151500 | 2.55573800  | 3.34526800  |
| F | -3.16465700 | 4.65639900  | 3.69469200  |
| F | -4.64786900 | 3.38514400  | 2.75201400  |
| F | -3.78006600 | 7.61524000  | -0.30065500 |
| F | -2.32792300 | 7.31069500  | -1.89693200 |
| F | -4.26624600 | 6.33613900  | -1.98940800 |
| S | 1.28520800  | 4.56520000  | -2.21229200 |

|   |             |             |             |
|---|-------------|-------------|-------------|
| H | -1.31730900 | 5.02196900  | -1.98461100 |
| C | 1.82218800  | -2.31686100 | -2.76409900 |
| H | -0.34215100 | 1.75258700  | -0.62132200 |
| H | 1.41787500  | 1.09530300  | -1.32586000 |
| H | 1.36187900  | -2.22494300 | -1.54171500 |
| O | -1.85601300 | -2.09880000 | -0.08822600 |
| O | -0.42557500 | -0.80411900 | 1.67952100  |
| P | -0.42691100 | -1.35588300 | 0.14700100  |
| O | -0.17759600 | -0.15890600 | -0.71787400 |
| C | -5.36508500 | 0.19231400  | 0.13117000  |
| C | -4.76686500 | -0.29965300 | 1.28556900  |
| C | -3.63371700 | -1.12634300 | 1.21034700  |
| C | -3.68271100 | -0.95815800 | -1.22470000 |
| C | -4.84140600 | -0.17085900 | -1.10789500 |
| C | -0.67098700 | -1.53665500 | 2.85672300  |
| C | -1.93535900 | -2.07001200 | 3.10475700  |
| C | -2.07795600 | -3.01775000 | 4.13130500  |
| C | -1.02648800 | -3.29464500 | 4.99585900  |
| C | 0.16095800  | -2.58013000 | 4.85569700  |
| C | 0.37305600  | -1.69071100 | 3.78938100  |
| H | -5.32919100 | 0.16094900  | -2.01959500 |
| H | 0.96384000  | -2.71643200 | 5.57385300  |
| C | -3.32340300 | -1.70822500 | 2.58200700  |
| C | -3.95386300 | -0.60436300 | 3.50198200  |
| H | -4.20171000 | -0.98668900 | 4.49613500  |
| H | -3.23080100 | 0.20641400  | 3.62870300  |
| H | -4.05195500 | -3.27904300 | 5.00003700  |
| H | -3.45479100 | -4.70361200 | 4.15681200  |
| C | -3.05884900 | -1.37587000 | -0.03237300 |
| H | -6.24174300 | 0.83208800  | 0.18829800  |
| H | -1.13654100 | -4.02491800 | 5.79335300  |
| C | -5.17611700 | -0.07881700 | 2.72345800  |
| H | -5.38725600 | 0.97348900  | 2.93766400  |
| H | -6.08611500 | -0.64570400 | 2.96484000  |
| C | -3.47211400 | -3.60814400 | 4.12684400  |
| C | -4.07007900 | -3.06235100 | 2.81139300  |
| H | -3.83383300 | -3.74131800 | 1.98397000  |
| H | -5.15700200 | -2.93744700 | 2.84555600  |
| C | 1.63830000  | -0.88629400 | 3.80416000  |
| C | 2.89534900  | -1.51770300 | 3.64208600  |
| C | 1.57264000  | 0.48048400  | 4.18117900  |
| C | 3.02437700  | -2.89097900 | 3.25869100  |
| C | 4.11014000  | -0.76648300 | 3.86727200  |
| C | 2.79577700  | 1.20909800  | 4.43372500  |

|   |              |              |              |
|---|--------------|--------------|--------------|
| C | 4. 25496000  | -3. 47180700 | 3. 09382400  |
| H | 2. 12777200  | -3. 47190500 | 3. 08286800  |
| C | 5. 37344800  | -1. 41327200 | 3. 69291100  |
| C | 4. 02665100  | 0. 56824200  | 4. 26979100  |
| C | 5. 44787300  | -2. 72718800 | 3. 31557500  |
| H | 4. 31770900  | -4. 50902800 | 2. 77812000  |
| H | 6. 27636800  | -0. 83296700 | 3. 86877900  |
| H | 4. 94301000  | 1. 12117700  | 4. 46658800  |
| H | 6. 41455400  | -3. 20624900 | 3. 18378000  |
| C | -3. 25480400 | -1. 37527400 | -2. 59787800 |
| C | -2. 80181800 | -0. 40663500 | -3. 52695900 |
| C | -3. 45860400 | -2. 71673700 | -3. 01144200 |
| C | -2. 58274800 | 0. 96446100  | -3. 17230200 |
| C | -2. 54537600 | -0. 79300800 | -4. 89734300 |
| C | -3. 17359800 | -3. 09373700 | -4. 37825800 |
| C | -2. 16672300 | 1. 88475900  | -4. 09962600 |
| H | -2. 74448800 | 1. 27050300  | -2. 14569100 |
| C | -2. 11391900 | 0. 19928400  | -5. 83367000 |
| C | -2. 72861000 | -2. 12399700 | -5. 28156700 |
| C | -1. 93428300 | 1. 50189700  | -5. 45172700 |
| H | -2. 00494900 | 2. 91623200  | -3. 80103500 |
| H | -1. 93850300 | -0. 10689800 | -6. 86257800 |
| H | -2. 53545400 | -2. 41004200 | -6. 31374500 |
| H | -1. 61147400 | 2. 24757500  | -6. 17295100 |
| C | 0. 31022400  | 2. 49721000  | 4. 76169300  |
| H | -0. 64383400 | 3. 00226400  | 4. 87874200  |
| C | 0. 33841200  | 1. 18387000  | 4. 36893700  |
| H | -0. 59508900 | 0. 65966800  | 4. 20189600  |
| C | 1. 51875000  | 3. 20421100  | 5. 01874200  |
| H | 1. 47882800  | 4. 24119500  | 5. 34072600  |
| C | 2. 72292800  | 2. 57226500  | 4. 86257800  |
| H | 3. 65431100  | 3. 09780800  | 5. 06097900  |
| C | -4. 17516000 | -5. 01347200 | -2. 57810600 |
| H | -4. 57357100 | -5. 75921000 | -1. 89560200 |
| C | -3. 86348600 | -5. 38518800 | -3. 91647500 |
| H | -4. 02037400 | -6. 41000100 | -4. 24154700 |
| C | -3. 37988300 | -4. 44821900 | -4. 78866600 |
| H | -3. 15160100 | -4. 71346300 | -5. 81832600 |
| C | -3. 98195400 | -3. 72838600 | -2. 14343100 |
| H | -4. 23326900 | -3. 46509900 | -1. 12261500 |
| N | 0. 68413900  | -2. 52876300 | -0. 22485500 |
| S | 0. 85105700  | -4. 00753300 | 0. 46058400  |
| C | -0. 11907300 | -5. 23215200 | -0. 60373200 |
| O | 2. 23962500  | -4. 44126700 | 0. 31282300  |

|   |             |             |             |
|---|-------------|-------------|-------------|
| O | 0.16917600  | -4.08873000 | 1.75428300  |
| F | -0.44601400 | -6.27384800 | 0.16097500  |
| F | 0.64056600  | -5.67692700 | -1.61980100 |
| F | -1.22596600 | -4.68424300 | -1.10291100 |
| C | 1.01304200  | -0.15205700 | -3.75074600 |
| H | 0.10073100  | -0.12130100 | -3.14775600 |
| H | 1.32688900  | 0.86781300  | -3.96239400 |
| H | 0.73897600  | -0.63794200 | -4.69782100 |
| C | 0.61260000  | -2.95812700 | -3.46657200 |
| H | 0.79028400  | -3.01117700 | -4.54898600 |
| H | 0.45953100  | -3.97400700 | -3.10913300 |
| H | -0.31309800 | -2.40361800 | -3.30500300 |
| C | 5.34998400  | 1.17394500  | -2.74311300 |
| C | 6.33319300  | 0.16987600  | -2.80961300 |
| C | 5.69151700  | 2.43618100  | -3.25299500 |
| C | 7.59092800  | 0.40877900  | -3.35900800 |
| H | 6.13278000  | -0.81880300 | -2.40751900 |
| C | 6.95381500  | 2.68129900  | -3.80154000 |
| H | 4.98543100  | 3.25727600  | -3.23120000 |
| C | 7.90988600  | 1.67076600  | -3.86181800 |
| H | 8.32346900  | -0.39358600 | -3.38715900 |
| H | 7.18117200  | 3.67293100  | -4.18353900 |
| H | 8.88964000  | 1.86219500  | -4.29063300 |
| C | 4.08131600  | 0.43152400  | -0.63437100 |
| H | 4.52581500  | -0.57033900 | -0.60274100 |
| H | 3.07537400  | 0.31402700  | -0.21730200 |
| C | 4.92704400  | 1.36189700  | 0.23326800  |
| C | 4.42834400  | 2.40035600  | 0.93952900  |
| C | 6.41242000  | 1.02888200  | 0.30514400  |
| H | 6.59022500  | -0.01785400 | 0.04143800  |
| H | 7.02392200  | 1.63453800  | -0.37511100 |
| H | 6.80488400  | 1.17177000  | 1.31669300  |
| C | 5.32348800  | 3.35132000  | 1.70841400  |
| H | 6.36779500  | 3.32713000  | 1.39129700  |
| H | 4.96376800  | 4.38092200  | 1.58625700  |
| H | 5.28979300  | 3.13849800  | 2.78677900  |
| C | 3.00683700  | -3.28027100 | -2.57027500 |
| H | 3.56612200  | -3.39616000 | -3.50765300 |
| H | 3.69403600  | -2.95656800 | -1.78574500 |
| H | 2.63891900  | -4.26185200 | -2.27341900 |
| C | 2.96771900  | 2.75147600  | 1.08821400  |
| H | 2.69543500  | 3.61338100  | 0.46409800  |
| H | 2.29345400  | 1.92956000  | 0.84446900  |
| H | 2.76513300  | 3.04138600  | 2.12522600  |

TS-1-1-7SR

1 imaginary frequency

H = -5472.460905

G = -5472.671219

E(M06-2X-DCM) = -5473.439984

|   |             |             |             |
|---|-------------|-------------|-------------|
| C | -3.37639700 | 3.27773700  | 1.09188500  |
| C | -3.31495800 | 2.37930500  | 2.38289500  |
| H | -4.27809600 | 1.88098000  | 2.46547800  |
| H | -3.26756400 | 3.09212700  | 3.22176700  |
| C | -2.20501000 | 1.42190200  | 2.73194900  |
| C | -2.09356900 | 4.11972400  | 0.87240300  |
| H | -2.31630500 | 4.95871300  | 0.20216900  |
| H | -1.78629700 | 4.58593400  | 1.81431400  |
| N | -0.98158200 | 3.35208000  | 0.33767300  |
| C | 0.27790500  | 3.85409300  | 0.20252800  |
| N | 1.16083200  | 2.90240400  | -0.25377300 |
| C | 2.48452100  | 2.98115700  | -0.70493500 |
| C | 3.26976500  | 4.14222300  | -0.75402800 |
| C | 3.03881700  | 1.76857100  | -1.16485400 |
| C | 4.57528800  | 4.07442500  | -1.24992700 |
| C | 4.33537600  | 1.72913700  | -1.66057700 |
| H | 2.43556500  | 0.86797100  | -1.15186500 |
| C | 5.12478600  | 2.88183000  | -1.70805200 |
| H | 6.13212300  | 2.85099200  | -2.10596900 |
| C | 4.91085200  | 0.44140100  | -2.18000800 |
| C | 5.41718700  | 5.32500900  | -1.23004700 |
| F | 3.98444500  | -0.54466500 | -2.25491500 |
| F | 5.42243400  | 0.59558700  | -3.42556500 |
| F | 5.91899500  | -0.02458000 | -1.40594000 |
| F | 6.43196400  | 5.26341400  | -2.12192400 |
| F | 4.69218500  | 6.42620600  | -1.51568100 |
| F | 5.97498500  | 5.52534200  | -0.01286800 |
| S | 0.62908500  | 5.45095300  | 0.61467800  |
| C | -4.50590000 | 4.36189100  | 1.36881400  |
| H | -4.67114300 | 4.88129000  | 0.42172000  |
| H | -4.06466900 | 5.10496000  | 2.04767300  |
| H | 2.86070100  | 5.08309700  | -0.41503300 |
| C | -2.43407200 | 0.05411800  | 2.99547400  |
| H | 0.82358000  | 1.93848000  | -0.18140300 |
| H | -1.19277100 | 2.44873900  | -0.07238100 |
| H | -2.08010200 | -0.47419700 | 1.81414600  |
| O | 0.79209100  | -2.26445600 | 1.15813500  |
| O | 0.29025100  | -1.45403000 | -1.29339800 |



|   |             |             |             |
|---|-------------|-------------|-------------|
| P | -0.03830200 | -1.17220900 | 0.27469100  |
| O | 0.33861800  | 0.24843900  | 0.53424800  |
| C | 4.99120000  | -2.15715200 | 1.05085500  |
| C | 4.26956300  | -2.82117100 | 0.06690500  |
| C | 2.87036800  | -2.91231700 | 0.13819700  |
| C | 2.90313700  | -1.65761400 | 2.22823000  |
| C | 4.30584300  | -1.61755400 | 2.13527700  |
| C | 0.24370900  | -2.64494100 | -2.04070900 |
| C | 1.02294700  | -3.74342200 | -1.67335300 |
| C | 0.72882500  | -5.00020400 | -2.22766600 |
| C | -0.17036300 | -5.11568100 | -3.27947900 |
| C | -0.73818500 | -3.95581100 | -3.79918200 |
| C | -0.56578000 | -2.69537200 | -3.19657500 |
| H | 4.85703300  | -1.14517200 | 2.94274100  |
| H | -1.35606100 | -4.01440800 | -4.68892200 |
| C | 2.35403400  | -3.86037100 | -0.93200900 |
| C | 3.51591500  | -3.75454100 | -1.98693800 |
| H | 3.56793100  | -4.63593400 | -2.63163500 |
| H | 3.33285200  | -2.88740000 | -2.62783700 |
| H | 2.27590700  | -6.52686400 | -2.26348400 |
| H | 0.92598600  | -6.91044600 | -1.20354400 |
| C | 2.19764200  | -2.26221100 | 1.16911700  |
| H | 6.07299900  | -2.07721500 | 0.98996200  |
| H | -0.38702800 | -6.08139900 | -3.72887400 |
| C | 4.79546000  | -3.52081700 | -1.16253500 |
| H | 5.53646800  | -2.91462600 | -1.69433800 |
| H | 5.28606700  | -4.46766900 | -0.89675500 |
| C | 1.55158300  | -6.08606700 | -1.56542300 |
| C | 2.25604400  | -5.33077700 | -0.41545400 |
| H | 1.62919600  | -5.34809000 | 0.48368100  |
| H | 3.23404700  | -5.74806800 | -0.15545800 |
| C | -1.15673000 | -1.51679400 | -3.90808100 |
| C | -2.53091100 | -1.53222800 | -4.27177600 |
| C | -0.30383700 | -0.50098900 | -4.42345200 |
| C | -3.46467000 | -2.48754700 | -3.74995400 |
| C | -3.03536400 | -0.56288800 | -5.21805400 |
| C | -0.84835000 | 0.50857500  | -5.30582100 |
| C | -4.76665200 | -2.52389700 | -4.18050300 |
| H | -3.13444500 | -3.17457200 | -2.98166900 |
| C | -4.39412800 | -0.65074500 | -5.65894700 |
| C | -2.18817400 | 0.43911000  | -5.69327100 |
| C | -5.23739000 | -1.60989300 | -5.16587300 |
| H | -5.44991100 | -3.25737200 | -3.76082400 |
| H | -4.74136400 | 0.06954800  | -6.39654200 |

|   |             |             |             |
|---|-------------|-------------|-------------|
| H | -2.57488500 | 1.17348000  | -6.39736400 |
| H | -6.26659500 | -1.66832200 | -5.51018300 |
| C | 2.30012200  | -1.15090500 | 3.50114500  |
| C | 2.39917000  | 0.22293600  | 3.83112000  |
| C | 1.80126300  | -2.07843100 | 4.45140600  |
| C | 2.86174300  | 1.20986300  | 2.90062300  |
| C | 2.01489100  | 0.67205200  | 5.15121500  |
| C | 1.40789400  | -1.61253500 | 5.76273500  |
| C | 2.95067800  | 2.53295700  | 3.24901300  |
| H | 3.12710300  | 0.89733400  | 1.89747300  |
| C | 2.13339900  | 2.06054600  | 5.47729300  |
| C | 1.53543200  | -0.25635800 | 6.07916900  |
| C | 2.58874600  | 2.96634100  | 4.55699400  |
| H | 3.28937800  | 3.26300400  | 2.51980300  |
| H | 1.85144100  | 2.37960100  | 6.47822400  |
| H | 1.25590300  | 0.08396600  | 7.07452400  |
| H | 2.67102200  | 4.01856800  | 4.81420900  |
| C | 1.89583700  | 0.54379500  | -4.69584000 |
| H | 2.96106500  | 0.54768400  | -4.48867400 |
| C | 1.10481200  | -0.44439700 | -4.16856200 |
| H | 1.56216800  | -1.20687400 | -3.55166800 |
| C | 1.34017700  | 1.55926600  | -5.52280300 |
| H | 1.98077900  | 2.33979400  | -5.92383200 |
| C | 0.00555500  | 1.53440400  | -5.81959300 |
| H | -0.43427300 | 2.28953400  | -6.46696800 |
| C | 1.20030100  | -4.34910500 | 5.12938100  |
| H | 1.12200700  | -5.40791000 | 4.89793700  |
| C | 0.80101100  | -3.88194700 | 6.41355200  |
| H | 0.41914400  | -4.58551200 | 7.14820600  |
| C | 0.90774500  | -2.55199800 | 6.71812200  |
| H | 0.61552000  | -2.18187900 | 7.69812400  |
| C | 1.68666800  | -3.48116900 | 4.18648300  |
| H | 1.99487300  | -3.85993500 | 3.21908300  |
| N | -1.60648600 | -1.43412600 | 0.77144300  |
| S | -2.60421100 | -2.67948600 | 0.44081500  |
| C | -2.24560000 | -4.03631200 | 1.69280900  |
| O | -3.97056300 | -2.25438800 | 0.75097900  |
| O | -2.29535600 | -3.33074000 | -0.83241600 |
| F | -3.04764600 | -5.06778600 | 1.42116600  |
| F | -2.49491100 | -3.62425600 | 2.94647000  |
| F | -0.97512400 | -4.43748000 | 1.61561600  |
| C | -3.73279000 | 2.49269400  | -0.18055600 |
| C | -4.19359400 | 1.17148800  | -0.16492800 |
| C | -3.67036200 | 3.14240700  | -1.42911000 |

|   |             |             |             |
|---|-------------|-------------|-------------|
| C | -4.61822700 | 0.53261000  | -1.33250900 |
| H | -4.23513000 | 0.60823400  | 0.75564900  |
| C | -4.09348500 | 2.51096600  | -2.59506000 |
| H | -3.30072900 | 4.16135300  | -1.49703900 |
| C | -4.58696500 | 1.20543700  | -2.55052200 |
| H | -4.96066300 | -0.49583900 | -1.27690400 |
| H | -4.03585600 | 3.04135500  | -3.54185300 |
| H | -4.92453300 | 0.71278100  | -3.45509100 |
| C | -5.83005500 | 3.90658100  | 1.96670800  |
| C | -6.91303400 | 3.58392900  | 1.22583200  |
| C | -5.90506700 | 3.91220600  | 3.49207800  |
| H | -6.80678400 | 4.41885700  | 3.85213200  |
| H | -5.91015100 | 2.90522800  | 3.93107100  |
| H | -5.05242400 | 4.44452900  | 3.92630800  |
| C | -0.85697900 | 1.99952000  | 3.02793800  |
| H | -0.07525600 | 1.49715300  | 2.44972600  |
| H | -0.79636700 | 3.06868400  | 2.84371100  |
| H | -0.62034400 | 1.81680400  | 4.08500300  |
| C | -1.40176900 | -0.66094500 | 3.87782800  |
| H | -1.49006900 | -0.31480000 | 4.91572000  |
| H | -1.57637400 | -1.73586100 | 3.86836600  |
| H | -0.37733900 | -0.49093800 | 3.55115700  |
| C | -8.21683800 | 3.13338600  | 1.84963700  |
| H | -8.99171700 | 3.90498300  | 1.73133600  |
| H | -8.59270700 | 2.23982600  | 1.33395400  |
| H | -8.14078200 | 2.89402500  | 2.91179200  |
| C | -6.99083600 | 3.64141100  | -0.28122000 |
| H | -7.93215300 | 4.11843600  | -0.58648200 |
| H | -6.16940200 | 4.18544700  | -0.74778500 |
| H | -6.99382500 | 2.63218800  | -0.71359100 |
| C | -3.85997600 | -0.45037100 | 3.26894000  |
| H | -4.20146600 | -0.06246900 | 4.23791000  |
| H | -4.59494600 | -0.17793200 | 2.51206700  |
| H | -3.86055800 | -1.53859400 | 3.32537800  |

TS-1-1-7SR-1

l imaginary frequency

H = -5472.463682

G = -5472.674820

E(M06-2X-DCM) = -5473.439349

|   |             |            |             |
|---|-------------|------------|-------------|
| C | -3.97339800 | 2.75534700 | -0.63388700 |
| C | -4.07645200 | 2.16834500 | 0.82252900  |
| H | -4.94739400 | 1.51637800 | 0.83712800  |
| H | -4.34535000 | 3.03092600 | 1.45480900  |

|   |             |             |             |
|---|-------------|-------------|-------------|
| C | -2.95612800 | 1.55909300  | 1.62502300  |
| C | -2.77471000 | 3.71541800  | -0.84653600 |
| H | -2.94533500 | 4.30192500  | -1.75807800 |
| H | -2.72722300 | 4.44973900  | -0.03651200 |
| N | -1.49226200 | 3.03830600  | -0.93719500 |
| C | -0.30231900 | 3.70388600  | -0.94801600 |
| N | 0.76871300  | 2.83991100  | -0.96859300 |
| C | 2.13812200  | 3.04795500  | -1.18145300 |
| C | 2.74578300  | 4.27836900  | -1.47193000 |
| C | 2.94299700  | 1.89168200  | -1.12734500 |
| C | 4.12464100  | 4.33506700  | -1.69403600 |
| C | 4.30964800  | 1.97289400  | -1.36199900 |
| H | 2.48297500  | 0.93106000  | -0.92612300 |
| C | 4.92217200  | 3.19673500  | -1.64516700 |
| H | 5.98654600  | 3.25519400  | -1.83926400 |
| C | 5.15845000  | 0.73298800  | -1.33733200 |
| C | 4.75933700  | 5.68017600  | -1.94056600 |
| F | 4.41528300  | -0.39801200 | -1.27342700 |
| F | 5.92614500  | 0.63738600  | -2.45030700 |
| F | 6.00699000  | 0.70569100  | -0.28269800 |
| F | 5.93656000  | 5.56837200  | -2.59706600 |
| F | 3.96292300  | 6.48816700  | -2.67078500 |
| F | 5.01694300  | 6.32577900  | -0.77904700 |
| S | -0.24333200 | 5.38775000  | -0.88358600 |
| C | -5.24193500 | 3.69460500  | -0.78804700 |
| H | -5.27657100 | 4.01647100  | -1.83485400 |
| H | -5.02849800 | 4.59580900  | -0.20727600 |
| H | 2.14695600  | 5.17569100  | -1.52672900 |
| C | -3.06246600 | 0.28111100  | 2.21518700  |
| H | 0.55164700  | 1.88331600  | -0.67471600 |
| H | -1.50183200 | 2.05376000  | -1.18115100 |
| H | -2.33079900 | -0.45823400 | 1.36279700  |
| O | 0.83305800  | -1.76124200 | 1.85012800  |
| O | 0.83114600  | -1.70665700 | -0.77515000 |
| P | 0.10032400  | -1.10716700 | 0.54832700  |
| O | 0.20656200  | 0.37792300  | 0.45185200  |
| C | 4.86998700  | -0.82511900 | 2.53648600  |
| C | 4.51430500  | -1.84968800 | 1.66813300  |
| C | 3.16833500  | -2.20556600 | 1.48780500  |
| C | 2.50812600  | -0.48231700 | 3.08233600  |
| C | 3.87018400  | -0.18010800 | 3.25869500  |
| C | 1.13400900  | -3.03183000 | -1.13634900 |
| C | 1.95698400  | -3.81969400 | -0.32998600 |
| C | 1.98517700  | -5.20821500 | -0.54285900 |

|   |             |             |             |
|---|-------------|-------------|-------------|
| C | 1.38477200  | -5.76487400 | -1.66431900 |
| C | 0.78579400  | -4.91460600 | -2.58986800 |
| C | 0.62490400  | -3.53716100 | -2.35214500 |
| H | 4.13356500  | 0.58512400  | 3.98257900  |
| H | 0.40195200  | -5.31933900 | -3.52045200 |
| C | 3.06980700  | -3.47640600 | 0.65935900  |
| C | 4.42935100  | -3.40791500 | -0.12874500 |
| H | 4.76348200  | -4.39545400 | -0.45781700 |
| H | 4.28998300  | -2.79273800 | -1.02162700 |
| H | 3.69675700  | -6.34664000 | 0.16651100  |
| H | 2.19743600  | -6.72235900 | 1.00542600  |
| C | 2.17866200  | -1.46875200 | 2.13241600  |
| H | 5.91101100  | -0.54335400 | 2.66831900  |
| H | 1.42244100  | -6.83571300 | -1.84710200 |
| C | 5.42001700  | -2.71274100 | 0.82401900  |
| H | 6.17220100  | -2.12013500 | 0.29249400  |
| H | 5.96323800  | -3.43831000 | 1.44558000  |
| C | 2.76833700  | -5.90388400 | 0.55150700  |
| C | 3.05473700  | -4.75905800 | 1.54988000  |
| H | 2.23476800  | -4.67820100 | 2.27307900  |
| H | 3.98749200  | -4.89067900 | 2.10753300  |
| C | 0.02447100  | -2.71905300 | -3.45345600 |
| C | -1.22965500 | -3.09516600 | -4.00594600 |
| C | 0.80109000  | -1.71134800 | -4.08961000 |
| C | -2.09051600 | -4.06714300 | -3.39628800 |
| C | -1.67830800 | -2.49652400 | -5.24271600 |
| C | 0.29900500  | -1.07222800 | -5.28656200 |
| C | -3.26333400 | -4.45723100 | -3.99127100 |
| H | -1.81503400 | -4.47829800 | -2.43390100 |
| C | -2.89613500 | -2.95000700 | -5.84222000 |
| C | -0.91353700 | -1.49214700 | -5.83770400 |
| C | -3.66629700 | -3.90973100 | -5.24259100 |
| H | -3.89601500 | -5.19104800 | -3.49927700 |
| H | -3.19558500 | -2.50885600 | -6.79058600 |
| H | -1.26095000 | -1.03625600 | -6.76285500 |
| H | -4.58818600 | -4.24720300 | -5.70884200 |
| C | 1.54107800  | 0.19939800  | 3.99920900  |
| C | 1.36368500  | 1.60250300  | 3.91991900  |
| C | 0.94982600  | -0.53550500 | 5.05868200  |
| C | 1.90133400  | 2.39038700  | 2.85020700  |
| C | 0.60389100  | 2.28716300  | 4.94260500  |
| C | 0.17975500  | 0.16084900  | 6.06541500  |
| C | 1.71632000  | 3.74803200  | 2.80104800  |
| H | 2.44591900  | 1.89125900  | 2.05733700  |

|   |             |             |             |
|---|-------------|-------------|-------------|
| C | 0.44550400  | 3.70720800  | 4.86022300  |
| C | 0.03874100  | 1.54990400  | 5.98665000  |
| C | 0.98542000  | 4.41959400  | 3.82306400  |
| H | 2.11798400  | 4.31972900  | 1.96965700  |
| H | -0.11767600 | 4.20816800  | 5.64448800  |
| H | -0.52488600 | 2.06981100  | 6.75912900  |
| H | 0.85476900  | 5.49662500  | 3.76787100  |
| C | 2.82953500  | -0.35295100 | -4.29296500 |
| H | 3.81841400  | -0.08915700 | -3.93164200 |
| C | 2.10483800  | -1.31924800 | -3.64400400 |
| H | 2.53600900  | -1.80470000 | -2.77810700 |
| C | 2.30607400  | 0.30195600  | -5.44244800 |
| H | 2.89063300  | 1.07206200  | -5.93809900 |
| C | 1.07649600  | -0.05471600 | -5.92343000 |
| H | 0.66789200  | 0.42058800  | -6.81216800 |
| C | 0.51089500  | -2.63083400 | 6.23934000  |
| H | 0.63745900  | -3.70707400 | 6.31963500  |
| C | -0.25837700 | -1.94143000 | 7.21900600  |
| H | -0.71410700 | -2.49607200 | 8.03463300  |
| C | -0.41273300 | -0.58435500 | 7.13274900  |
| H | -0.98954700 | -0.04285100 | 7.87898300  |
| C | 1.09697800  | -1.95283300 | 5.20220300  |
| H | 1.68740900  | -2.49608600 | 4.47385100  |
| N | -1.49350800 | -1.53853000 | 0.78144300  |
| S | -2.18705100 | -3.00965700 | 0.65596400  |
| C | -2.03650100 | -3.85572300 | 2.32996300  |
| O | -3.62586700 | -2.81247200 | 0.47129000  |
| O | -1.43695900 | -3.91295700 | -0.21732100 |
| F | -2.54915200 | -5.08225400 | 2.21352900  |
| F | -2.72323300 | -3.19872900 | 3.27898100  |
| F | -0.76039400 | -3.94715000 | 2.70739300  |
| C | -3.96892000 | 1.67324600  | -1.72736100 |
| C | -3.95240700 | 0.30017400  | -1.45285500 |
| C | -4.01081800 | 2.06482700  | -3.07919500 |
| C | -4.03507300 | -0.64870400 | -2.47615300 |
| H | -3.88717700 | -0.06258000 | -0.43653500 |
| C | -4.09278100 | 1.12417700  | -4.10159100 |
| H | -3.99236400 | 3.11821900  | -3.34369800 |
| C | -4.12400100 | -0.23966100 | -3.80389800 |
| H | -4.03057200 | -1.70377700 | -2.22106100 |
| H | -4.13601600 | 1.45974400  | -5.13456200 |
| H | -4.20076600 | -0.97644700 | -4.59556000 |
| C | -6.60782700 | 3.13539000  | -0.41804500 |
| C | -7.27868400 | 3.50932200  | 0.69625700  |

|   |             |             |             |
|---|-------------|-------------|-------------|
| C | -7.18004500 | 2.17023100  | -1.44029900 |
| H | -8.25741100 | 2.02965100  | -1.34210400 |
| H | -6.98930000 | 2.53793100  | -2.45536400 |
| H | -6.70709000 | 1.18215900  | -1.38519500 |
| C | -1.81056500 | 2.44182800  | 2.00764800  |
| H | -0.85231300 | 1.96945700  | 1.76960900  |
| H | -1.84482800 | 3.42110700  | 1.53825700  |
| H | -1.82086100 | 2.58175300  | 3.09717600  |
| C | -2.22363800 | 0.03598700  | 3.47863700  |
| H | -2.63037900 | 0.61539700  | 4.31764100  |
| H | -2.25363600 | -1.01679100 | 3.75488600  |
| H | -1.17865900 | 0.31434300  | 3.35121800  |
| C | -8.64251000 | 2.97379100  | 1.08158300  |
| H | -8.62649900 | 2.61536900  | 2.12007800  |
| H | -9.39673900 | 3.77301900  | 1.04616400  |
| H | -8.99525900 | 2.15080600  | 0.45988200  |
| C | -6.78528100 | 4.51092400  | 1.72061100  |
| H | -6.60724900 | 4.02085200  | 2.68883600  |
| H | -5.87106300 | 5.03885200  | 1.44432000  |
| H | -7.55765700 | 5.27036300  | 1.90425200  |
| C | -4.43213600 | -0.41407400 | 2.27962600  |
| H | -5.10009500 | 0.14705000  | 2.94636100  |
| H | -4.92432800 | -0.52591700 | 1.31308600  |
| H | -4.31762400 | -1.41735600 | 2.68861600  |

TS-1-1-7SR-2

l imaginary frequency

H = -5472.460479

G = -5472.671212

E(M06-2X-DCM) = -5473.439042

|   |             |             |             |
|---|-------------|-------------|-------------|
| C | -3.87144100 | 1.45374200  | 2.48032500  |
| C | -3.06848000 | 0.64635300  | 3.58116700  |
| H | -3.68232900 | -0.20925000 | 3.85856700  |
| H | -3.06264100 | 1.30870600  | 4.46245800  |
| C | -1.62302700 | 0.23270200  | 3.49519200  |
| C | -3.15660800 | 2.75109000  | 2.04183600  |
| H | -3.86479800 | 3.41441200  | 1.53936800  |
| H | -2.81450200 | 3.30853600  | 2.92079600  |
| N | -2.02442200 | 2.51221900  | 1.15985100  |
| C | -1.18133600 | 3.49927800  | 0.74606100  |
| N | -0.16473100 | 3.00800300  | -0.03968900 |
| C | 0.82493800  | 3.63516200  | -0.80748300 |
| C | 1.06642900  | 5.01506500  | -0.87322400 |
| C | 1.62469000  | 2.76979200  | -1.58276800 |

|   |              |              |              |
|---|--------------|--------------|--------------|
| C | 2. 08771900  | 5. 50051100  | -1. 69590700 |
| C | 2. 62809900  | 3. 27728500  | -2. 39733500 |
| H | 1. 43484500  | 1. 70286900  | -1. 55690700 |
| C | 2. 87649700  | 4. 65145700  | -2. 46442300 |
| H | 3. 65278700  | 5. 04622800  | -3. 10907100 |
| C | 3. 45522500  | 2. 35532500  | -3. 24882600 |
| C | 2. 36644000  | 6. 98220500  | -1. 69487300 |
| F | 3. 00961000  | 1. 07635400  | -3. 20903200 |
| F | 3. 43959400  | 2. 73662000  | -4. 54936200 |
| F | 4. 75529300  | 2. 33111500  | -2. 87185500 |
| F | 3. 02410600  | 7. 37242300  | -2. 81020300 |
| F | 1. 23260300  | 7. 70889400  | -1. 61698500 |
| F | 3. 13581300  | 7. 33870900  | -0. 63932100 |
| S | -1. 41099600 | 5. 10012700  | 1. 22536200  |
| C | -5. 18533600 | 1. 86804900  | 3. 28074500  |
| H | -4. 84587400 | 2. 45877500  | 4. 14369200  |
| H | -5. 59208500 | 0. 94070800  | 3. 69245100  |
| H | 0. 45771200  | 5. 69538300  | -0. 29502200 |
| C | -1. 20503000 | -1. 11038000 | 3. 62034900  |
| H | -0. 05860000 | 1. 99003000  | -0. 01362100 |
| H | -1. 95650900 | 1. 59918600  | 0. 72310700  |
| H | -1. 05553200 | -1. 43086700 | 2. 33087900  |
| O | 1. 94034000  | -1. 86657100 | 0. 67392900  |
| O | 0. 43884900  | -1. 29765800 | -1. 40906800 |
| P | 0. 52190200  | -1. 20420000 | 0. 21306900  |
| O | 0. 37368300  | 0. 24011100  | 0. 56015500  |
| C | 5. 51069800  | -0. 02336100 | -0. 55453200 |
| C | 4. 84304700  | -0. 91155300 | -1. 38839200 |
| C | 3. 68575100  | -1. 57616400 | -0. 95270200 |
| C | 3. 86293800  | -0. 45500500 | 1. 20476900  |
| C | 5. 03655500  | 0. 16539700  | 0. 74028200  |
| C | 0. 63492900  | -2. 38967900 | -2. 27417000 |
| C | 1. 85304400  | -3. 07163000 | -2. 28983200 |
| C | 1. 91936200  | -4. 32920400 | -2. 91216600 |
| C | 0. 86231000  | -4. 79180400 | -3. 68466900 |
| C | -0. 24227900 | -3. 96394900 | -3. 86375400 |
| C | -0. 40107300 | -2. 75397800 | -3. 16181600 |
| H | 5. 57778400  | 0. 81062700  | 1. 42563100  |
| H | -1. 02736400 | -4. 26025200 | -4. 55121600 |
| C | 3. 28110900  | -2. 63694000 | -1. 96325700 |
| C | 3. 92661500  | -2. 04356400 | -3. 26918800 |
| H | 4. 12025100  | -2. 81484100 | -4. 01943800 |
| H | 3. 23290900  | -1. 32181700 | -3. 70975800 |
| H | 3. 84815200  | -5. 07622600 | -3. 58071000 |



|   |              |              |              |
|---|--------------|--------------|--------------|
| H | 3. 15026200  | -6. 00033000 | -2. 25711100 |
| C | 3. 16264400  | -1. 28043300 | 0. 30294800  |
| H | 6. 40005200  | 0. 49939400  | -0. 89536500 |
| H | 0. 91405400  | -5. 75389600 | -4. 18786800 |
| C | 5. 19771500  | -1. 31169800 | -2. 79968700 |
| H | 5. 44148000  | -0. 44493300 | -3. 42302600 |
| H | 6. 07519400  | -1. 97332800 | -2. 81199000 |
| C | 3. 26050900  | -4. 98561900 | -2. 65728100 |
| C | 3. 92854700  | -4. 02287300 | -1. 64937000 |
| H | 3. 66583000  | -4. 31139100 | -0. 62494600 |
| H | 5. 02023700  | -4. 00071300 | -1. 72649700 |
| C | -1. 59103400 | -1. 91603300 | -3. 51741500 |
| C | -2. 88886400 | -2. 49595300 | -3. 49806500 |
| C | -1. 40351600 | -0. 63051400 | -4. 09806100 |
| C | -3. 16868200 | -3. 75934800 | -2. 87980000 |
| C | -3. 99191400 | -1. 81204100 | -4. 13439600 |
| C | -2. 53842500 | 0. 07328800  | -4. 65580000 |
| C | -4. 41452800 | -4. 32928400 | -2. 94946500 |
| H | -2. 38188500 | -4. 25553700 | -2. 32647200 |
| C | -5. 27002600 | -2. 45207400 | -4. 20549400 |
| C | -3. 79181300 | -0. 54210600 | -4. 67741900 |
| C | -5. 47769200 | -3. 68205200 | -3. 64134800 |
| H | -4. 59449800 | -5. 28564600 | -2. 46579900 |
| H | -6. 07596700 | -1. 93206000 | -4. 71877700 |
| H | -4. 62747900 | -0. 02595200 | -5. 14631900 |
| H | -6. 45199800 | -4. 15955100 | -3. 70427600 |
| C | 3. 53119000  | -0. 26656000 | 2. 65216400  |
| C | 3. 18634700  | 1. 01946100  | 3. 13548600  |
| C | 3. 74570700  | -1. 33549700 | 3. 55970100  |
| C | 2. 92299700  | 2. 12706900  | 2. 26506000  |
| C | 3. 08116800  | 1. 24487000  | 4. 56028800  |
| C | 3. 62319000  | -1. 09838200 | 4. 98104500  |
| C | 2. 59635800  | 3. 36281400  | 2. 76123200  |
| H | 2. 96772900  | 1. 97059400  | 1. 19364000  |
| C | 2. 74702000  | 2. 55246700  | 5. 03651900  |
| C | 3. 30628500  | 0. 18359400  | 5. 44116400  |
| C | 2. 51303100  | 3. 58331800  | 4. 16621700  |
| H | 2. 38819800  | 4. 18190100  | 2. 07910500  |
| H | 2. 68362300  | 2. 70771600  | 6. 11124200  |
| H | 3. 23522500  | 0. 35922400  | 6. 51298000  |
| H | 2. 25710900  | 4. 57109500  | 4. 53897800  |
| C | 0. 01598800  | 1. 23837400  | -4. 80317200 |
| H | 1. 00251700  | 1. 68203500  | -4. 89024700 |
| C | -0. 12487800 | 0. 00324000  | -4. 22446100 |

|   |             |             |             |
|---|-------------|-------------|-------------|
| H | 0.75760300  | -0.50857300 | -3.86343900 |
| C | -1.11435900 | 1.94226900  | -5.30383000 |
| H | -0.98478300 | 2.92417100  | -5.75048800 |
| C | -2.35360600 | 1.36848100  | -5.23352200 |
| H | -3.22702600 | 1.88118600  | -5.62981200 |
| C | 4.30715000  | -3.66504700 | 4.04442500  |
| H | 4.57764500  | -4.65755100 | 3.69440100  |
| C | 4.17049500  | -3.42870200 | 5.44164100  |
| H | 4.33392300  | -4.24126000 | 6.14419200  |
| C | 3.84235700  | -2.17881900 | 5.89218000  |
| H | 3.74379800  | -1.98086900 | 6.95702300  |
| C | 4.10759000  | -2.65567600 | 3.13875200  |
| H | 4.22750600  | -2.85530000 | 2.08045400  |
| N | -0.58520000 | -2.10055900 | 1.07409000  |
| S | -1.06533000 | -3.64293800 | 0.86091000  |
| C | 0.16434300  | -4.74217000 | 1.76452400  |
| O | -2.31943300 | -3.82812600 | 1.59331600  |
| O | -0.93691600 | -4.09140100 | -0.52590100 |
| F | -0.21133300 | -6.01060700 | 1.58854000  |
| F | 0.17603800  | -4.48258000 | 3.08233500  |
| F | 1.39840000  | -4.58044200 | 1.28257100  |
| C | -4.25593200 | 0.59873500  | 1.26383100  |
| C | -4.17130300 | -0.80003400 | 1.25894600  |
| C | -4.79524000 | 1.21769100  | 0.11965000  |
| C | -4.64122200 | -1.55817600 | 0.18552300  |
| H | -3.73320400 | -1.33307100 | 2.09019700  |
| C | -5.26881000 | 0.46471400  | -0.95242500 |
| H | -4.86066300 | 2.29807100  | 0.06202600  |
| C | -5.21036500 | -0.92945500 | -0.91838900 |
| H | -4.54284300 | -2.63856200 | 0.21809800  |
| H | -5.68025700 | 0.97272000  | -1.82065900 |
| H | -5.58247000 | -1.51697200 | -1.74984600 |
| C | -6.28262800 | 2.65419700  | 2.58697800  |
| C | -7.39082000 | 2.07415200  | 2.07517600  |
| C | -6.10781900 | 4.16998100  | 2.57790400  |
| H | -6.98149700 | 4.68250600  | 2.99689100  |
| H | -5.24484700 | 4.47541300  | 3.17651600  |
| H | -5.95342000 | 4.57753800  | 1.57026300  |
| C | -0.59162900 | 1.31639900  | 3.50100700  |
| H | 0.11503000  | 1.19614500  | 2.67402700  |
| H | -1.01764100 | 2.31515600  | 3.45576900  |
| H | 0.00000600  | 1.23245000  | 4.42295400  |
| C | 0.23964100  | -1.34214600 | 4.08269300  |
| H | 0.34156400  | -1.08160700 | 5.14409200  |

|   |             |             |            |
|---|-------------|-------------|------------|
| H | 0.50872300  | -2.39132900 | 3.96909400 |
| H | 0.96198000  | -0.75400600 | 3.51944700 |
| C | -8.49498000 | 2.87231500  | 1.41811700 |
| H | -8.67155400 | 2.50599300  | 0.39720300 |
| H | -9.44294500 | 2.74028900  | 1.95906900 |
| H | -8.29000700 | 3.94205100  | 1.35493300 |
| C | -7.67919900 | 0.59149900  | 2.07001700 |
| H | -7.68096600 | 0.20782800  | 1.04110700 |
| H | -6.96162400 | -0.00890600 | 2.63034400 |
| H | -8.67998700 | 0.39856300  | 2.48083800 |
| C | -2.16003700 | -2.16584700 | 4.20117700 |
| H | -2.31382700 | -1.96608000 | 5.26987400 |
| H | -3.13460200 | -2.21776500 | 3.71692800 |
| H | -1.71407300 | -3.15548000 | 4.10601800 |

TS-1-1-7RS

1 imaginary frequency

H = -5472.469061

G = -5472.678016

E(M06-2X-DCM) = -5473.445212

|   |             |            |             |
|---|-------------|------------|-------------|
| C | 3.40491000  | 2.43215900 | 2.06320300  |
| C | 2.35494900  | 2.13201300 | 3.21996400  |
| H | 2.95008100  | 1.75508400 | 4.05927100  |
| H | 1.95702400  | 3.11007000 | 3.51492500  |
| C | 1.13337900  | 1.24183900 | 3.09759700  |
| C | 2.76017900  | 3.11869200 | 0.82559900  |
| H | 3.48070200  | 3.08370600 | -0.00058100 |
| H | 2.61012600  | 4.17234600 | 1.05643000  |
| N | 1.46489800  | 2.63928200 | 0.37326900  |
| C | 0.47083500  | 3.47130100 | -0.06218000 |
| N | -0.59116000 | 2.77228900 | -0.58581900 |
| C | -1.83036500 | 3.20829500 | -1.08174600 |
| C | -2.51209100 | 4.35004100 | -0.63178100 |
| C | -2.44424100 | 2.38425700 | -2.03721200 |
| C | -3.76925200 | 4.65317000 | -1.15163200 |
| C | -3.70362900 | 2.70284800 | -2.54220600 |
| H | -1.93191500 | 1.49295300 | -2.38612100 |
| C | -4.37727900 | 3.84474100 | -2.11322200 |
| H | -5.34953900 | 4.09970300 | -2.51701500 |
| C | -4.36790200 | 1.75419600 | -3.49944000 |
| C | -4.53690000 | 5.82455300 | -0.59693900 |
| F | -3.48382400 | 1.19624500 | -4.36026900 |
| F | -5.32866400 | 2.34935300 | -4.23257800 |
| F | -4.96159600 | 0.72086900 | -2.83897100 |

|   |             |             |             |
|---|-------------|-------------|-------------|
| F | -3.73089800 | 6.77103900  | -0.08068100 |
| F | -5.37573700 | 5.43342300  | 0.40005700  |
| F | -5.30888500 | 6.40947500  | -1.53916400 |
| S | 0.54396200  | 5.15660200  | 0.04373100  |
| H | -2.05894200 | 4.99061300  | 0.11032500  |
| C | 1.10481000  | -0.11874000 | 3.46579900  |
| H | -0.45831600 | 1.75876800  | -0.64137900 |
| H | 1.35314500  | 1.64956300  | 0.16062900  |
| H | 0.94965500  | -0.81377100 | 2.31663000  |
| O | -1.74125600 | -1.38046000 | 0.03040200  |
| O | 0.35370000  | -2.31308400 | -1.24084600 |
| P | -0.11411500 | -1.31524500 | -0.04475600 |
| O | 0.23569000  | 0.11845700  | -0.27953000 |
| C | -3.93211700 | -4.94661900 | 0.39505100  |
| C | -3.28081500 | -4.63290500 | -0.79106600 |
| C | -2.65132300 | -3.38971200 | -0.95288700 |
| C | -3.26032200 | -2.77988300 | 1.32811400  |
| C | -3.96415000 | -3.99694000 | 1.41108100  |
| C | -0.00261400 | -1.97071100 | -2.56299100 |
| C | -1.28986700 | -2.26616900 | -3.01182400 |
| C | -1.70939700 | -1.78528600 | -4.26396500 |
| C | -0.83012800 | -1.10102800 | -5.09381000 |
| C | 0.48744600  | -0.93266500 | -4.67926300 |
| C | 0.93717200  | -1.35668700 | -3.41499300 |
| H | -4.53678300 | -4.19378700 | 2.31146000  |
| H | 1.20391300  | -0.45353700 | -5.33932400 |
| C | -2.36648600 | -3.17431800 | -2.43333100 |
| C | -2.15988600 | -4.65385600 | -2.89773600 |
| H | -2.30195600 | -4.77663300 | -3.97584500 |
| H | -1.13552200 | -4.95826100 | -2.65480700 |
| H | -3.72390700 | -1.27888600 | -4.90800400 |
| H | -3.24462000 | -2.93979900 | -5.25838900 |
| C | -2.53567700 | -2.53489800 | 0.14143700  |
| H | -4.44112600 | -5.89894800 | 0.51899600  |
| H | -1.15374900 | -0.72599500 | -6.06106300 |
| C | -3.16185300 | -5.46522100 | -2.04874900 |
| H | -4.13148100 | -5.56677300 | -2.55543700 |
| H | -2.80894800 | -6.48147400 | -1.83935400 |
| C | -3.15774200 | -2.13074500 | -4.51981500 |
| C | -3.64016400 | -2.57803900 | -3.12745700 |
| H | -4.46808800 | -3.29209000 | -3.15871400 |
| H | -3.97728400 | -1.70160100 | -2.56355800 |
| C | 2.40481600  | -1.20793900 | -3.15447600 |
| C | 3.23611200  | -2.35701200 | -3.18339800 |

|   |              |              |              |
|---|--------------|--------------|--------------|
| C | 2. 98152500  | 0. 08556700  | -3. 11183600 |
| C | 2. 72170400  | -3. 69202300 | -3. 24785400 |
| C | 4. 67383700  | -2. 19560300 | -3. 19222700 |
| C | 4. 41969300  | 0. 23138400  | -3. 13845000 |
| C | 3. 55569700  | -4. 77872700 | -3. 28271800 |
| H | 1. 64869900  | -3. 84163600 | -3. 26793900 |
| C | 5. 50845500  | -3. 35686400 | -3. 22723500 |
| C | 5. 22393200  | -0. 91016500 | -3. 18584400 |
| C | 4. 96965700  | -4. 61403400 | -3. 26690200 |
| H | 3. 13488500  | -5. 77960700 | -3. 32451200 |
| H | 6. 58656000  | -3. 21423500 | -3. 22619100 |
| H | 6. 30572700  | -0. 79623400 | -3. 21100000 |
| H | 5. 61431000  | -5. 48824500 | -3. 29336500 |
| C | -3. 41871400 | -1. 81175400 | 2. 45650100  |
| C | -3. 98864400 | -0. 53176500 | 2. 21989700  |
| C | -3. 14144800 | -2. 22832500 | 3. 78651800  |
| C | -4. 38198100 | -0. 07468500 | 0. 92091200  |
| C | -4. 23842800 | 0. 35784800  | 3. 33330700  |
| C | -3. 46395800 | -1. 35324100 | 4. 89213800  |
| C | -4. 90529400 | 1. 17640200  | 0. 72659400  |
| H | -4. 27592400 | -0. 73910000 | 0. 07256400  |
| C | -4. 76540900 | 1. 66545800  | 3. 08493100  |
| C | -3. 98588500 | -0. 08277600 | 4. 63512800  |
| C | -5. 07859300 | 2. 07483400  | 1. 81731000  |
| H | -5. 19365300 | 1. 48140900  | -0. 27387100 |
| H | -4. 91818100 | 2. 32622000  | 3. 93525000  |
| H | -4. 20749000 | 0. 57856100  | 5. 47072300  |
| H | -5. 45889100 | 3. 07530400  | 1. 63293900  |
| C | 2. 77870600  | 2. 52229000  | -3. 02666600 |
| H | 2. 15832500  | 3. 41227100  | -2. 96790700 |
| C | 2. 19448600  | 1. 28161500  | -3. 04758500 |
| H | 1. 11555100  | 1. 19183900  | -3. 00181300 |
| C | 4. 19657300  | 2. 65831300  | -3. 06875100 |
| H | 4. 64109400  | 3. 64954300  | -3. 05637700 |
| C | 4. 98939000  | 1. 54312100  | -3. 11834900 |
| H | 6. 07279200  | 1. 63284100  | -3. 14291000 |
| C | -2. 29016400 | -3. 86147900 | 5. 39734100  |
| H | -1. 80389800 | -4. 81172100 | 5. 59870400  |
| C | -2. 65925500 | -3. 01700400 | 6. 48181600  |
| H | -2. 47747900 | -3. 33977400 | 7. 50339600  |
| C | -3. 21972200 | -1. 79388400 | 6. 23087700  |
| H | -3. 48717800 | -1. 12676400 | 7. 04723800  |
| C | -2. 51992200 | -3. 48151200 | 4. 10009700  |
| H | -2. 19947900 | -4. 12785200 | 3. 29220100  |

|   |             |             |             |
|---|-------------|-------------|-------------|
| N | 0.61056000  | -1.86467100 | 1.34020900  |
| S | 0.78036800  | -3.44816800 | 1.75125600  |
| C | 2.53507800  | -3.85145500 | 1.23032200  |
| O | -0.08263000 | -4.32287300 | 0.95555500  |
| O | 0.81017000  | -3.56890700 | 3.20993200  |
| F | 2.71799300  | -5.16887400 | 1.35154900  |
| F | 2.75741300  | -3.49071100 | -0.03401700 |
| F | 3.39707800  | -3.21596400 | 2.02961800  |
| C | 4.18979100  | 1.14815500  | 1.74035200  |
| C | 5.15260700  | 0.65307100  | 2.64044400  |
| C | 3.96461700  | 0.40720700  | 0.57378200  |
| C | 5.87339600  | -0.50955500 | 2.37703100  |
| H | 5.34954900  | 1.17376500  | 3.57217100  |
| C | 4.66822900  | -0.77242300 | 0.31546900  |
| H | 3.24179700  | 0.73811200  | -0.16332500 |
| C | 5.63306400  | -1.23120000 | 1.20788400  |
| H | 6.61575300  | -0.85364100 | 3.09257900  |
| H | 4.45204600  | -1.33243100 | -0.58578000 |
| H | 6.18104000  | -2.14627500 | 1.00166900  |
| C | 4.35442200  | 3.54342500  | 2.68015300  |
| H | 3.69737200  | 4.26919100  | 3.16137900  |
| H | 4.94209400  | 3.09352800  | 3.48835200  |
| C | 5.30166600  | 4.26545200  | 1.73017500  |
| C | 5.14410000  | 5.56883600  | 1.40221000  |
| C | -0.21510900 | -0.60659900 | 4.09873100  |
| H | -1.08755500 | -0.38450500 | 3.48617500  |
| H | -0.17489600 | -1.68490200 | 4.24526100  |
| H | -0.35204000 | -0.12708500 | 5.07700700  |
| C | 6.04968500  | 6.31071900  | 0.44014900  |
| H | 5.44117300  | 6.84417100  | -0.30253600 |
| H | 6.63224800  | 7.07965800  | 0.96778500  |
| H | 6.74730100  | 5.67540800  | -0.10657900 |
| C | 6.45734100  | 3.42437600  | 1.22216600  |
| H | 7.26410800  | 4.02276600  | 0.79633100  |
| H | 6.88798700  | 2.83272800  | 2.03862900  |
| H | 6.13938800  | 2.70110500  | 0.46035300  |
| C | -0.16755100 | 1.95019700  | 2.84413800  |
| H | -0.02544400 | 2.97236400  | 2.49713900  |
| H | -0.79745800 | 1.41274400  | 2.12862400  |
| H | -0.73563100 | 1.98045400  | 3.78612600  |
| C | 2.33564100  | -0.75720200 | 4.11348400  |
| H | 3.24736300  | -0.59550800 | 3.54171500  |
| H | 2.48238500  | -0.35101300 | 5.12480000  |
| H | 2.18285900  | -1.83317900 | 4.21041800  |

|   |             |             |             |
|---|-------------|-------------|-------------|
| C | 4. 04564200 | 6. 47796700 | 1. 91640300 |
| H | 3. 27568700 | 6. 63415200 | 1. 14849200 |
| H | 3. 53798700 | 6. 11861900 | 2. 81354100 |
| H | 4. 46209800 | 7. 46620400 | 2. 15199600 |

TS-1-1-7RS-1

1 imaginary frequency

H = -5472. 466558

G = -5472. 675602

E(M06-2X-DCM) = -5473. 442696

|   |              |              |              |
|---|--------------|--------------|--------------|
| C | 3. 58553600  | 2. 66774500  | 1. 22375900  |
| C | 2. 63271400  | 2. 53333200  | 2. 49278000  |
| H | 3. 30284600  | 2. 26318000  | 3. 31652300  |
| H | 2. 26838700  | 3. 54980900  | 2. 68489400  |
| C | 1. 41279200  | 1. 64233500  | 2. 62705700  |
| C | 2. 80287700  | 3. 09979800  | -0. 05913500 |
| H | 3. 37218700  | 2. 79334700  | -0. 94138700 |
| H | 2. 73698000  | 4. 18646300  | -0. 07929000 |
| N | 1. 43220700  | 2. 64116100  | -0. 20702100 |
| C | 0. 39975800  | 3. 46813100  | -0. 56295900 |
| N | -0. 73252600 | 2. 75744200  | -0. 88024500 |
| C | -2. 02195400 | 3. 17379400  | -1. 24724200 |
| C | -2. 62184500 | 4. 37733200  | -0. 84506100 |
| C | -2. 76928100 | 2. 26585500  | -2. 01350500 |
| C | -3. 93431500 | 4. 65411000  | -1. 22505300 |
| C | -4. 08009800 | 2. 56079900  | -2. 38180300 |
| H | -2. 31968500 | 1. 32711200  | -2. 32213000 |
| C | -4. 67610000 | 3. 76131800  | -1. 99978200 |
| H | -5. 69053400 | 3. 99659600  | -2. 29789600 |
| C | -4. 87727100 | 1. 52941300  | -3. 12927100 |
| C | -4. 60573800 | 5. 90019200  | -0. 70929800 |
| F | -4. 12121700 | 0. 85313100  | -4. 02664400 |
| F | -5. 91788800 | 2. 06519300  | -3. 79597200 |
| F | -5. 39247100 | 0. 59426800  | -2. 28288700 |
| F | -3. 72658900 | 6. 87935000  | -0. 42587900 |
| F | -5. 29689800 | 5. 64659100  | 0. 43441900  |
| F | -5. 49903300 | 6. 39206600  | -1. 59584200 |
| S | 0. 51381600  | 5. 15348900  | -0. 58522300 |
| H | -2. 06421800 | 5. 08477900  | -0. 24914300 |
| C | 1. 45190500  | 0. 33141900  | 3. 14466900  |
| H | -0. 62016000 | 1. 74009200  | -0. 86837400 |
| H | 1. 27231100  | 1. 64333700  | -0. 33742400 |
| H | 1. 12823000  | -0. 50372400 | 2. 12352800  |
| O | -1. 83488100 | -1. 28223200 | 0. 29628000  |

|   |             |             |             |
|---|-------------|-------------|-------------|
| O | 0.06836400  | -2.42351100 | -1.09609000 |
| P | -0.23154000 | -1.26744800 | 0.00648300  |
| O | 0.09483600  | 0.11400100  | -0.45995300 |
| C | -4.02084200 | -4.71917500 | 1.32510400  |
| C | -3.52433800 | -4.55466100 | 0.03830000  |
| C | -2.89536500 | -3.35828400 | -0.33857900 |
| C | -3.18882100 | -2.49120700 | 1.92270200  |
| C | -3.89843900 | -3.66835900 | 2.22834200  |
| C | -0.43251300 | -2.22612000 | -2.40032600 |
| C | -1.76912200 | -2.52419300 | -2.66083800 |
| C | -2.32082200 | -2.17529800 | -3.90531700 |
| C | -1.52674800 | -1.62990400 | -4.90665200 |
| C | -0.16598500 | -1.46080300 | -4.66657900 |
| C | 0.41527000  | -1.74486200 | -3.41736100 |
| H | -4.34839300 | -3.75096300 | 3.21227800  |
| H | 0.47944500  | -1.08702600 | -5.45550800 |
| C | -2.79125100 | -3.31727000 | -1.85839100 |
| C | -2.67934100 | -4.84581500 | -2.17327700 |
| H | -2.95644700 | -5.08026500 | -3.20563600 |
| H | -1.64026100 | -5.15986200 | -2.02259400 |
| H | -4.38346600 | -1.65801600 | -4.36149100 |
| H | -4.00023900 | -3.36685300 | -4.57105600 |
| C | -2.62400900 | -2.39571600 | 0.63250100  |
| H | -4.52797300 | -5.63549200 | 1.61590100  |
| H | -1.95147200 | -1.36039100 | -5.87001200 |
| C | -3.58699500 | -5.52107800 | -1.12372200 |
| H | -4.61518100 | -5.63680200 | -1.49348500 |
| H | -3.23787700 | -6.52257800 | -0.84758200 |
| C | -3.79936800 | -2.48512100 | -3.94682400 |
| C | -4.12268000 | -2.75220600 | -2.46412000 |
| H | -4.96696700 | -3.43162500 | -2.31591800 |
| H | -4.36730400 | -1.80524000 | -1.97107800 |
| C | 1.90161000  | -1.59763500 | -3.31667200 |
| C | 2.71564900  | -2.75777800 | -3.26739400 |
| C | 2.49274800  | -0.32028800 | -3.47839400 |
| C | 2.18223000  | -4.08132800 | -3.14709000 |
| C | 4.15119200  | -2.62588600 | -3.38511200 |
| C | 3.92688800  | -0.20706600 | -3.62129500 |
| C | 2.99926700  | -5.18067100 | -3.10856200 |
| H | 1.10820300  | -4.21148700 | -3.08512500 |
| C | 4.96847900  | -3.79884100 | -3.33475800 |
| C | 4.71457600  | -1.35977000 | -3.57016300 |
| C | 4.41336900  | -5.04187600 | -3.19620500 |
| H | 2.56479600  | -6.17180900 | -3.01118300 |



|   |             |             |             |
|---|-------------|-------------|-------------|
| H | 6.04609700  | -3.67759800 | -3.41661300 |
| H | 5.79352200  | -1.27000800 | -3.67813700 |
| H | 5.04473800  | -5.92541300 | -3.16065400 |
| C | -3.17396100 | -1.40737000 | 2.95307700  |
| C | -3.75744100 | -0.14446600 | 2.66473000  |
| C | -2.71650900 | -1.69256400 | 4.26777300  |
| C | -4.32353700 | 0.18703900  | 1.39170300  |
| C | -3.84010100 | 0.85987900  | 3.70305700  |
| C | -2.87103300 | -0.70124700 | 5.30972000  |
| C | -4.85822900 | 1.42359900  | 1.14283400  |
| H | -4.34169700 | -0.56220800 | 0.61011100  |
| C | -4.38462000 | 2.14744600  | 3.39503300  |
| C | -3.41158200 | 0.54854200  | 4.99614300  |
| C | -4.86919300 | 2.43233100  | 2.14742500  |
| H | -5.28152800 | 1.63187700  | 0.16597600  |
| H | -4.41012600 | 2.89510900  | 4.18454200  |
| H | -3.50728600 | 1.29696800  | 5.78061100  |
| H | -5.26233100 | 3.41752200  | 1.91399700  |
| C | 2.32097400  | 2.10909200  | -3.71218800 |
| H | 1.71497300  | 3.01060300  | -3.73397900 |
| C | 1.72497000  | 0.88955000  | -3.51743400 |
| H | 0.65166600  | 0.82886400  | -3.38161700 |
| C | 3.73316100  | 2.21025800  | -3.87556600 |
| H | 4.18665400  | 3.18422700  | -4.03727000 |
| C | 4.50971800  | 1.08370400  | -3.82203400 |
| H | 5.58926700  | 1.14759700  | -3.93538200 |
| C | -1.66634200 | -3.17437200 | 5.90685100  |
| H | -1.16753900 | -4.11138200 | 6.13732100  |
| C | -1.86876600 | -2.21393300 | 6.93735100  |
| H | -1.54809900 | -2.43509100 | 7.95180100  |
| C | -2.44535500 | -1.00879300 | 6.64014100  |
| H | -2.58750200 | -0.25507500 | 7.41131900  |
| C | -2.07231600 | -2.92326400 | 4.62154900  |
| H | -1.87720900 | -3.65717200 | 3.84916600  |
| N | 0.66565100  | -1.65127300 | 1.34668800  |
| S | 0.88300800  | -3.17590400 | 1.92792400  |
| C | 2.55018100  | -3.67970500 | 1.23296100  |
| O | -0.08582400 | -4.12098300 | 1.37003600  |
| O | 1.11112600  | -3.11720700 | 3.37238900  |
| F | 2.73133000  | -4.98011100 | 1.47590700  |
| F | 2.60921400  | -3.46441000 | -0.08186000 |
| F | 3.51759800  | -2.98352300 | 1.83709300  |
| C | 4.39297200  | 1.37645600  | 1.03438800  |
| C | 5.51411600  | 1.11452200  | 1.84200200  |

|   |             |             |             |
|---|-------------|-------------|-------------|
| C | 4.02941200  | 0.39958500  | 0.09782700  |
| C | 6.24434600  | -0.06560200 | 1.71378400  |
| H | 5.82243300  | 1.83241600  | 2.59257800  |
| C | 4.75075800  | -0.79040300 | -0.02588600 |
| H | 3.17353700  | 0.54540500  | -0.55266300 |
| C | 5.86462600  | -1.02656500 | 0.77665800  |
| H | 7.10789400  | -0.23363500 | 2.35231100  |
| H | 4.42935600  | -1.53429100 | -0.74551800 |
| H | 6.42426800  | -1.95286700 | 0.67981500  |
| C | 4.53117100  | 3.88050100  | 1.62949200  |
| H | 3.90940300  | 4.78387100  | 1.55005500  |
| H | 4.75305800  | 3.77627800  | 2.69143100  |
| C | 5.82710400  | 4.11709000  | 0.86436000  |
| C | 7.02350400  | 4.24693600  | 1.48221900  |
| C | 0.24636800  | -0.06569700 | 4.02377600  |
| H | -0.71042300 | 0.08923700  | 3.52748200  |
| H | 0.31760000  | -1.11860000 | 4.29226200  |
| H | 0.25347800  | 0.53024100  | 4.94613900  |
| C | 8.32941100  | 4.49268600  | 0.75298000  |
| H | 8.70424800  | 5.50752000  | 0.95022300  |
| H | 9.09904800  | 3.80369600  | 1.12654800  |
| H | 8.27476600  | 4.35864700  | -0.32754000 |
| C | 5.66834800  | 4.28697700  | -0.63312800 |
| H | 6.53524100  | 4.75172600  | -1.10393800 |
| H | 5.49699700  | 3.32607000  | -1.13588900 |
| H | 4.80448700  | 4.92316400  | -0.85928800 |
| C | 0.08285800  | 2.32967700  | 2.49675000  |
| H | 0.16245400  | 3.30496200  | 2.01910900  |
| H | -0.64663500 | 1.72071300  | 1.95397200  |
| H | -0.33359500 | 2.47378000  | 3.50513600  |
| C | 2.77255600  | -0.23885400 | 3.66722200  |
| H | 3.58784500  | -0.14783700 | 2.95221600  |
| H | 3.06547800  | 0.27753400  | 4.59315800  |
| H | 2.64732300  | -1.29568300 | 3.90791200  |
| C | 7.25637200  | 4.17579800  | 2.97772200  |
| H | 7.83617600  | 5.04969900  | 3.30503600  |
| H | 6.35173700  | 4.14762300  | 3.58721400  |
| H | 7.86285900  | 3.29525500  | 3.23490700  |

TS-1-1-7RR

l imaginary frequency

H = -5472.467561

G = -5472.676396

E(M06-2X-DCM) = -5473.448685

|   |              |              |              |
|---|--------------|--------------|--------------|
| C | 3. 50993600  | 2. 37151000  | 1. 49820300  |
| C | 3. 07636600  | 1. 42945300  | 2. 70002900  |
| H | 3. 84125500  | 0. 66363500  | 2. 78837100  |
| H | 3. 17842500  | 2. 05087700  | 3. 60913600  |
| C | 1. 73426300  | 0. 80331500  | 2. 96777600  |
| C | 2. 43406200  | 3. 39394700  | 1. 06364600  |
| H | 2. 88377400  | 4. 06996400  | 0. 32950100  |
| H | 2. 13876500  | 4. 02616000  | 1. 90894800  |
| N | 1. 23867600  | 2. 82147300  | 0. 47024600  |
| C | 0. 16119100  | 3. 58414000  | 0. 14785100  |
| N | -0. 88250300 | 2. 83222900  | -0. 34768900 |
| C | -2. 16836400 | 3. 21168100  | -0. 76123500 |
| C | -2. 86558600 | 4. 32240900  | -0. 25847900 |
| C | -2. 80860500 | 2. 37320500  | -1. 68701800 |
| C | -4. 16118000 | 4. 58379500  | -0. 69975500 |
| C | -4. 10719400 | 2. 64997400  | -2. 11188800 |
| H | -2. 28853500 | 1. 50245800  | -2. 07465500 |
| C | -4. 79568600 | 3. 76249000  | -1. 63230800 |
| H | -5. 79891500 | 3. 98415900  | -1. 97505100 |
| C | -4. 79685400 | 1. 68611500  | -3. 03485300 |
| C | -4. 93455500 | 5. 72119400  | -0. 08560000 |
| F | -3. 95131900 | 1. 16614100  | -3. 95540500 |
| F | -5. 82245500 | 2. 25268900  | -3. 70023300 |
| F | -5. 31253500 | 0. 62806800  | -2. 34792200 |
| F | -5. 80132800 | 6. 27100300  | -0. 96466600 |
| F | -4. 13364900 | 6. 70251700  | 0. 36954200  |
| F | -5. 67668400 | 5. 29491600  | 0. 97192000  |
| S | 0. 16333400  | 5. 26046200  | 0. 34843700  |
| C | 3. 90331100  | 1. 55129000  | 0. 20365000  |
| H | 3. 98589200  | 2. 29341700  | -0. 59407600 |
| H | 3. 04284200  | 0. 92793400  | -0. 06721200 |
| H | -2. 39261300 | 4. 97250400  | 0. 46265400  |
| C | 1. 62113100  | -0. 55541800 | 3. 34558100  |
| H | -0. 68645400 | 1. 83292500  | -0. 44485300 |
| H | 1. 20133600  | 1. 82879400  | 0. 25323400  |
| H | 1. 24453700  | -1. 08415600 | 2. 21174100  |
| O | -1. 76463400 | -1. 35201200 | 0. 13406800  |
| O | 0. 20151000  | -2. 12604500 | -1. 39999000 |
| P | -0. 14647700 | -1. 28363400 | -0. 05673400 |
| O | 0. 20469400  | 0. 17008700  | -0. 11234900 |
| C | -3. 80666400 | -4. 98948200 | 0. 61613800  |
| C | -3. 28225500 | -4. 63108300 | -0. 61884200 |
| C | -2. 72113800 | -3. 35990300 | -0. 81534600 |
| C | -3. 11532200 | -2. 82260300 | 1. 53100600  |

|   |             |             |             |
|---|-------------|-------------|-------------|
| C | -3.77261600 | -4.06161000 | 1.65293400  |
| C | -0.33322400 | -1.74008400 | -2.64375700 |
| C | -1.63126800 | -2.12923400 | -2.97476100 |
| C | -2.20342800 | -1.65507800 | -4.16818700 |
| C | -1.46630500 | -0.88110600 | -5.05555700 |
| C | -0.13879800 | -0.59495500 | -4.75354400 |
| C | 0.45951800  | -1.00617400 | -3.54861400 |
| H | -4.24803300 | -4.29646000 | 2.59967700  |
| H | 0.46562600  | -0.02857300 | -5.45522500 |
| C | -2.58529500 | -3.11609800 | -2.31335600 |
| C | -2.33953500 | -4.57742300 | -2.81151200 |
| H | -2.56251400 | -4.69936700 | -3.87599200 |
| H | -1.28510300 | -4.82975200 | -2.65336600 |
| H | -4.29923800 | -1.29559500 | -4.62167300 |
| H | -3.73361200 | -2.91465400 | -5.03523500 |
| C | -2.52335300 | -2.52682200 | 0.28332500  |
| H | -4.26473800 | -5.96343200 | 0.76785300  |
| H | -1.91064200 | -0.51687800 | -5.97795600 |
| C | -3.22841500 | -5.44509100 | -1.89339300 |
| H | -4.22953400 | -5.59286000 | -2.32116700 |
| H | -2.80811400 | -6.44291900 | -1.72416000 |
| C | -3.63908400 | -2.10560200 | -4.29750700 |
| C | -3.95577700 | -2.59574800 | -2.87350000 |
| H | -4.73685500 | -3.36021200 | -2.83584700 |
| H | -4.28992600 | -1.74741700 | -2.26693500 |
| C | 1.91230800  | -0.69178100 | -3.37720700 |
| C | 2.87179300  | -1.73127100 | -3.46433900 |
| C | 2.33078900  | 0.66146100  | -3.33428000 |
| C | 2.51638200  | -3.11384500 | -3.57725000 |
| C | 4.27926800  | -1.40042000 | -3.49203500 |
| C | 3.73811900  | 0.97799000  | -3.41808800 |
| C | 3.47117200  | -4.09275200 | -3.66516100 |
| H | 1.46783700  | -3.38737000 | -3.59222800 |
| C | 5.24416800  | -2.45350000 | -3.57357500 |
| C | 4.67199900  | -0.05917100 | -3.48176000 |
| C | 4.85616200  | -3.76352800 | -3.65336700 |
| H | 3.17004800  | -5.13371200 | -3.74541300 |
| H | 6.29795400  | -2.18468500 | -3.58336000 |
| H | 5.73101400  | 0.18341300  | -3.53728100 |
| H | 5.59859200  | -4.55417100 | -3.71948600 |
| C | -3.17380300 | -1.88167800 | 2.69174300  |
| C | -3.79837100 | -0.61365100 | 2.54501000  |
| C | -2.74073500 | -2.31274200 | 3.97450900  |
| C | -4.35828500 | -0.15320200 | 1.31021200  |

|   |             |             |             |
|---|-------------|-------------|-------------|
| C | -3.93558800 | 0.25490600  | 3.69365000  |
| C | -2.94444200 | -1.45692500 | 5.12315600  |
| C | -4.94351800 | 1.08069700  | 1.20211200  |
| H | -4.33345300 | -0.80245800 | 0.44392600  |
| C | -4.52903500 | 1.54730500  | 3.53240200  |
| C | -3.51504900 | -0.19354300 | 4.94856200  |
| C | -5.01138300 | 1.95943500  | 2.32002200  |
| H | -5.36194100 | 1.38800700  | 0.24949300  |
| H | -4.59580800 | 2.19303500  | 4.40502400  |
| H | -3.64908200 | 0.45236300  | 5.81431100  |
| H | -5.44605600 | 2.94741400  | 2.19994800  |
| C | 1.84246700  | 3.05762500  | -3.23182200 |
| H | 1.12417500  | 3.86652600  | -3.13366100 |
| C | 1.41239900  | 1.75587000  | -3.22164900 |
| H | 0.35499100  | 1.54031800  | -3.12288800 |
| C | 3.22790000  | 3.36267200  | -3.36100300 |
| H | 3.54931100  | 4.40031800  | -3.38514000 |
| C | 4.14505700  | 2.34929600  | -3.44559300 |
| H | 5.20633400  | 2.56761000  | -3.53465300 |
| C | -1.70477400 | -3.96286800 | 5.45604600  |
| H | -1.19705400 | -4.91425000 | 5.58716800  |
| C | -1.95115900 | -3.13486400 | 6.58734200  |
| H | -1.65395200 | -3.47048500 | 7.57728400  |
| C | -2.54309000 | -1.91241900 | 6.41863500  |
| H | -2.72161600 | -1.25898600 | 7.26966500  |
| C | -2.08005600 | -3.56550300 | 4.19851100  |
| H | -1.85011800 | -4.20006400 | 3.35188400  |
| N | 0.68607500  | -2.03233300 | 1.15861600  |
| S | 0.88152500  | -3.64569400 | 1.36326200  |
| C | 2.58777700  | -3.97606300 | 0.65041700  |
| O | -0.03385600 | -4.44278600 | 0.54613100  |
| O | 1.02998100  | -3.92916300 | 2.79328600  |
| F | 2.73548400  | -5.29245200 | 0.49199700  |
| F | 2.74246700  | -3.36596200 | -0.52367100 |
| F | 3.53296500  | -3.53437900 | 1.49414700  |
| C | 4.72942600  | 3.16612500  | 2.04607900  |
| C | 4.83062600  | 4.56523700  | 1.96235200  |
| C | 5.78767000  | 2.49015300  | 2.68350500  |
| C | 5.93435000  | 5.25078200  | 2.47734500  |
| H | 4.05041400  | 5.15720700  | 1.50024100  |
| C | 6.88953900  | 3.17085100  | 3.19886900  |
| H | 5.77033600  | 1.41089900  | 2.77479600  |
| C | 6.97226900  | 4.55998600  | 3.09663700  |
| H | 5.97074800  | 6.33358900  | 2.39280600  |

|   |             |             |             |
|---|-------------|-------------|-------------|
| H | 7.68483900  | 2.60915000  | 3.68210900  |
| H | 7.82955200  | 5.09333600  | 3.49814500  |
| C | 5.13282800  | 0.65554300  | 0.19009000  |
| C | 0.52929300  | 1.68656800  | 3.10427200  |
| H | 0.73217400  | 2.72886100  | 2.87488700  |
| H | -0.28874100 | 1.34120600  | 2.46232400  |
| H | 0.15995100  | 1.61665300  | 4.13590900  |
| C | 4.88967900  | -0.80075500 | 0.55825700  |
| H | 3.82770200  | -0.98950300 | 0.72689500  |
| H | 5.19513400  | -1.48354000 | -0.24266600 |
| H | 5.42824700  | -1.11340300 | 1.46343300  |
| C | 6.35110600  | 1.07870800  | -0.21277800 |
| C | 2.87493100  | -1.35556100 | 3.73228800  |
| H | 3.66400700  | -1.33240800 | 2.98154800  |
| H | 3.28390900  | -0.97161500 | 4.67599800  |
| H | 2.59879900  | -2.39975200 | 3.88143100  |
| C | 7.55402900  | 0.16269200  | -0.25950900 |
| H | 7.34716600  | -0.85570600 | 0.07325700  |
| H | 7.96023300  | 0.10719900  | -1.27981300 |
| H | 8.36317500  | 0.56219400  | 0.36850800  |
| C | 6.68596200  | 2.48603200  | -0.64731300 |
| H | 5.81902400  | 3.13993800  | -0.74476200 |
| H | 7.37096800  | 2.95746700  | 0.07022900  |
| H | 7.20943400  | 2.46967000  | -1.61384600 |
| C | 0.40981300  | -0.94456300 | 4.20381500  |
| H | 0.53150000  | -0.55108600 | 5.22228400  |
| H | -0.53218700 | -0.57070300 | 3.80439900  |
| H | 0.33478300  | -2.02987700 | 4.26322700  |

TS-1-1-7RR-1

1 imaginary frequency

H = -5472.465864

G = -5472.674477

E(M06-2X-DCM) = -5473.444922

|   |            |            |             |
|---|------------|------------|-------------|
| C | 3.45412100 | 2.64049700 | 1.35056200  |
| C | 3.11139200 | 1.69693300 | 2.58002700  |
| H | 3.93047900 | 0.98644400 | 2.65572100  |
| H | 3.19193000 | 2.33557000 | 3.47947400  |
| C | 1.82152200 | 0.98742500 | 2.89242500  |
| C | 2.30587600 | 3.57276600 | 0.91113500  |
| H | 2.70301600 | 4.26590600 | 0.16196900  |
| H | 1.96930500 | 4.19760000 | 1.74619700  |
| N | 1.15087300 | 2.90368700 | 0.33789200  |
| C | 0.03265100 | 3.59420200 | -0.01148900 |

|   |             |             |             |
|---|-------------|-------------|-------------|
| N | -0.97690600 | 2.77153900  | -0.46153500 |
| C | -2.27987000 | 3.07390400  | -0.88643100 |
| C | -3.01678300 | 4.18612600  | -0.44688600 |
| C | -2.89268400 | 2.15812400  | -1.75609600 |
| C | -4.32134700 | 4.37529000  | -0.89800100 |
| C | -4.20164100 | 2.36293900  | -2.19050700 |
| H | -2.34381400 | 1.28355500  | -2.09199100 |
| C | -4.92801600 | 3.47782500  | -1.77692200 |
| H | -5.93884800 | 3.64312000  | -2.12902400 |
| C | -4.86220200 | 1.32178500  | -3.04825100 |
| C | -5.13213300 | 5.52165200  | -0.35249400 |
| F | -4.00203700 | 0.76795100  | -3.93442500 |
| F | -5.90354500 | 1.81432000  | -3.74758400 |
| F | -5.34812300 | 0.29651900  | -2.29324200 |
| F | -6.01620100 | 5.98798500  | -1.26209600 |
| F | -4.36439000 | 6.55471500  | 0.04091000  |
| F | -5.86066400 | 5.13652900  | 0.73008900  |
| S | -0.04393000 | 5.27684700  | 0.11064100  |
| C | 3.86725600  | 1.76553600  | 0.08848900  |
| H | 3.51069900  | 2.31026000  | -0.79361600 |
| H | 3.27936400  | 0.84439800  | 0.11626300  |
| H | -2.56653400 | 4.89452000  | 0.23235600  |
| C | 1.81167800  | -0.36613500 | 3.30341900  |
| H | -0.73587400 | 1.77820900  | -0.50789900 |
| H | 1.17286400  | 1.90225200  | 0.15999800  |
| H | 1.37997900  | -0.95138700 | 2.21710800  |
| O | -1.68801100 | -1.38007700 | 0.23548700  |
| O | 0.26309400  | -2.18411000 | -1.30018400 |
| P | -0.07559900 | -1.28447900 | 0.00773200  |
| O | 0.24106900  | 0.17222100  | -0.12263000 |
| C | -3.61246700 | -5.03253500 | 1.00189300  |
| C | -3.12436800 | -4.74309200 | -0.26548700 |
| C | -2.60819100 | -3.47159800 | -0.55973200 |
| C | -2.96716800 | -2.79090300 | 1.75473200  |
| C | -3.58514000 | -4.03653000 | 1.97380700  |
| C | -0.31840300 | -1.89300300 | -2.54832800 |
| C | -1.60633700 | -2.35466200 | -2.82229200 |
| C | -2.22186800 | -1.98353000 | -4.03064200 |
| C | -1.53783000 | -1.23836300 | -4.98259400 |
| C | -0.21966500 | -0.87409200 | -4.72885600 |
| C | 0.42059200  | -1.18209000 | -3.51484200 |
| H | -4.03280800 | -4.22096900 | 2.94495600  |
| H | 0.34389600  | -0.32547600 | -5.47715200 |
| C | -2.50830500 | -3.32883900 | -2.07367900 |

|   |             |             |             |
|---|-------------|-------------|-------------|
| C | -2.21906000 | -4.81199500 | -2.47362600 |
| H | -2.45410600 | -5.01597100 | -3.52287700 |
| H | -1.15430500 | -5.01703900 | -2.31661100 |
| H | -4.33832300 | -1.73985000 | -4.46345200 |
| H | -3.71470300 | -3.36035600 | -4.77571000 |
| C | -2.41211600 | -2.56179300 | 0.47645200  |
| H | -4.03612300 | -6.00746100 | 1.22877900  |
| H | -2.01676300 | -0.95372200 | -5.91558800 |
| C | -3.06345000 | -5.64204500 | -1.48140700 |
| H | -4.06530600 | -5.85305400 | -1.87988100 |
| H | -2.60617000 | -6.61076600 | -1.25034900 |
| C | -3.63971400 | -2.49844000 | -4.09804100 |
| C | -3.90879400 | -2.89959400 | -2.63735400 |
| H | -4.65921300 | -3.68764100 | -2.52936900 |
| H | -4.26250900 | -2.02397100 | -2.08313800 |
| C | 1.85977400  | -0.78735000 | -3.39988200 |
| C | 2.86893000  | -1.77900500 | -3.47626600 |
| C | 2.20752500  | 0.58581000  | -3.42837300 |
| C | 2.58225900  | -3.18158800 | -3.51142100 |
| C | 4.25491100  | -1.37832100 | -3.57426000 |
| C | 3.59265200  | 0.97031600  | -3.57435500 |
| C | 3.58283100  | -4.11406900 | -3.59480300 |
| H | 1.54948300  | -3.50760800 | -3.46966900 |
| C | 5.26948800  | -2.38412900 | -3.65255100 |
| C | 4.57689200  | -0.01962200 | -3.63324300 |
| C | 4.94792600  | -3.71465400 | -3.65793600 |
| H | 3.33407100  | -5.17161800 | -3.61472400 |
| H | 6.30647500  | -2.06331700 | -3.72236000 |
| H | 5.61892000  | 0.27403900  | -3.74125400 |
| H | 5.72760600  | -4.46873900 | -3.72223200 |
| C | -3.02446100 | -1.77684300 | 2.85222500  |
| C | -3.69478500 | -0.54191900 | 2.64016500  |
| C | -2.54315200 | -2.10724800 | 4.14751900  |
| C | -4.30576400 | -0.18544400 | 1.39530200  |
| C | -3.82802700 | 0.39802200  | 3.73148600  |
| C | -2.73938800 | -1.18032900 | 5.24126800  |
| C | -4.93929900 | 1.01709500  | 1.22421100  |
| H | -4.28175000 | -0.89054000 | 0.57371000  |
| C | -4.47266200 | 1.65516500  | 3.50344600  |
| C | -3.35441400 | 0.05066600  | 4.99948800  |
| C | -5.00685300 | 1.96641700  | 2.28276700  |
| H | -5.39603000 | 1.24503500  | 0.26687200  |
| H | -4.53671000 | 2.35619900  | 4.33249400  |
| H | -3.48430200 | 0.74981800  | 5.82349800  |



|   |             |             |             |
|---|-------------|-------------|-------------|
| H | -5.48216500 | 2.92762900  | 2.11148100  |
| C | 1.59575000  | 2.95546700  | -3.41102400 |
| H | 0.83886800  | 3.72970100  | -3.32404900 |
| C | 1.23603600  | 1.63476600  | -3.33275000 |
| H | 0.19493100  | 1.36887400  | -3.19253900 |
| C | 2.95856500  | 3.32587400  | -3.59730200 |
| H | 3.22384700  | 4.37671600  | -3.67353400 |
| C | 3.92493500  | 2.35852300  | -3.67138700 |
| H | 4.96953500  | 2.62802700  | -3.80602600 |
| C | -1.42495100 | -3.62642100 | 5.70724600  |
| H | -0.89041000 | -4.55466800 | 5.88830400  |
| C | -1.66089700 | -2.72824800 | 6.78619900  |
| H | -1.32801800 | -2.98778700 | 7.78760200  |
| C | -2.28915300 | -1.53509800 | 6.55214000  |
| H | -2.46182800 | -0.82949600 | 7.36171500  |
| C | -1.84380600 | -3.32525100 | 4.43695600  |
| H | -1.62122800 | -4.01121600 | 3.62934700  |
| N | 0.80215800  | -1.95958000 | 1.23574100  |
| S | 1.02892900  | -3.55894100 | 1.51170600  |
| C | 2.70975100  | -3.91427100 | 0.75110200  |
| O | 0.09373700  | -4.40701500 | 0.77214200  |
| O | 1.23786000  | -3.76858000 | 2.94687600  |
| F | 2.84867200  | -5.23528200 | 0.62644600  |
| F | 2.82783500  | -3.34007700 | -0.44558700 |
| F | 3.68198700  | -3.45203400 | 1.55093900  |
| C | 4.61335000  | 3.53296200  | 1.88353600  |
| C | 4.57942800  | 4.93675700  | 1.84373500  |
| C | 5.73782800  | 2.93978900  | 2.48924200  |
| C | 5.61943500  | 5.70696600  | 2.37229500  |
| H | 3.74309200  | 5.46530900  | 1.40291100  |
| C | 6.77573200  | 3.70528600  | 3.01728400  |
| H | 5.82716700  | 1.86032800  | 2.52796900  |
| C | 6.72363500  | 5.09862600  | 2.96249800  |
| H | 5.55381500  | 6.79046000  | 2.32035500  |
| H | 7.62796900  | 3.20679100  | 3.47196800  |
| H | 7.53070700  | 5.69817400  | 3.37445000  |
| C | 5.33670700  | 1.46748900  | -0.16660000 |
| C | 0.56453600  | 1.79262000  | 3.04340300  |
| H | 0.68569100  | 2.83476200  | 2.76173600  |
| H | -0.25174100 | 1.36391800  | 2.45147500  |
| H | 0.24122700  | 1.74572300  | 4.09173600  |
| C | 6.14163400  | 2.65060600  | -0.69629500 |
| H | 5.52980000  | 3.55419400  | -0.74744700 |
| H | 7.00749200  | 2.89074200  | -0.07077300 |

|   |             |             |             |
|---|-------------|-------------|-------------|
| H | 6.51229300  | 2.45386500  | -1.71003400 |
| C | 5.89203100  | 0.24002400  | -0.07493900 |
| C | 3.13261500  | -1.08616500 | 3.61101700  |
| H | 3.86033500  | -1.03333600 | 2.80092600  |
| H | 3.59020700  | -0.66281200 | 4.51473200  |
| H | 2.92881600  | -2.14095000 | 3.79828600  |
| C | 7.34274900  | -0.01906200 | -0.42047100 |
| H | 7.91748900  | 0.88687400  | -0.61910600 |
| H | 7.84207300  | -0.56085600 | 0.39486000  |
| H | 7.41706800  | -0.66690200 | -1.30617700 |
| C | 5.16904900  | -1.02357200 | 0.31771900  |
| H | 4.10497200  | -0.88879700 | 0.51181600  |
| H | 5.25306100  | -1.77345800 | -0.47998900 |
| H | 5.62278400  | -1.47659100 | 1.21030600  |
| C | 0.68755800  | -0.79477100 | 4.25902400  |
| H | 0.85815000  | -0.35650600 | 5.25182000  |
| H | -0.30053000 | -0.49058500 | 3.91687800  |
| H | 0.68133300  | -1.87936900 | 4.35737600  |

TS-1-2-7SS

l imaginary frequency

H = -5472.463010

G = -5472.675620

E(M06-2X-DCM) = -5473.449034

|   |             |             |             |
|---|-------------|-------------|-------------|
| O | -1.32731200 | -1.42253400 | -1.63045400 |
| O | -3.10046500 | -0.62713600 | 0.11680100  |
| P | -1.50859900 | -0.81655800 | -0.13598400 |
| O | -0.95156500 | 0.61931300  | -0.00799100 |
| N | -0.97121800 | -1.93281300 | 0.87232800  |
| S | 0.59645200  | -2.23185000 | 1.00886200  |
| C | 0.74040200  | -3.99695700 | 0.41255400  |
| F | 0.22747600  | -4.11195600 | -0.81251800 |
| F | 0.08543500  | -4.82269000 | 1.23790600  |
| F | 2.03106100  | -4.33776900 | 0.38815000  |
| C | -0.11697900 | 4.48434300  | 0.51474000  |
| C | -0.15882000 | 4.01099900  | 2.02224100  |
| H | -1.07259900 | 4.43148700  | 2.45418100  |
| H | 0.68521700  | 4.50077100  | 2.51665800  |
| C | -0.11256400 | 2.55661600  | 2.44774300  |
| C | 1.12712200  | 3.88290000  | -0.22276400 |
| H | 0.95965200  | 3.92143500  | -1.30229100 |
| H | 1.99334300  | 4.50793300  | -0.00696700 |
| N | 1.53345200  | 2.52808500  | 0.13435700  |
| C | 2.84407200  | 2.22018800  | 0.44222500  |

|   |             |             |             |
|---|-------------|-------------|-------------|
| N | 3.07025900  | 0.87526000  | 0.53541500  |
| C | 4.27820000  | 0.19209800  | 0.82313700  |
| C | 5.20216600  | 0.61644100  | 1.78710500  |
| C | 4.50551800  | -1.00900000 | 0.14144900  |
| C | 6.34806900  | -0.14205700 | 2.02642900  |
| C | 5.65570000  | -1.75523500 | 0.39399500  |
| H | 3.77708300  | -1.36336400 | -0.57646600 |
| C | 6.59320300  | -1.32683700 | 1.33095500  |
| H | 7.49110800  | -1.90244400 | 1.51967400  |
| C | 5.90319000  | -2.99207800 | -0.42501900 |
| C | 7.30264600  | 0.28491600  | 3.11051400  |
| F | 6.37379600  | -2.67858700 | -1.66589900 |
| F | 6.81591000  | -3.80899500 | 0.13931800  |
| F | 4.77432700  | -3.70859200 | -0.61865600 |
| F | 8.57431600  | -0.08134000 | 2.82976800  |
| F | 7.29595900  | 1.62094000  | 3.29792000  |
| F | 6.98877600  | -0.28106500 | 4.30080200  |
| S | 4.01980300  | 3.39834900  | 0.72800900  |
| H | 5.03588500  | 1.53246700  | 2.33425700  |
| C | -1.21522200 | 1.69213900  | 2.45119400  |
| H | 2.32199800  | 0.23677500  | 0.25407400  |
| O | 1.41724700  | -1.46205400 | 0.03793800  |
| H | 0.95248700  | 1.76963400  | -0.21770300 |
| O | 1.03080300  | -2.24864900 | 2.40779400  |
| H | -0.96628400 | 1.20545800  | 1.19585300  |
| C | -5.76944000 | -3.81223400 | -0.45639700 |
| C | -5.31121900 | -3.06882600 | -1.53710100 |
| C | -4.46478400 | -1.96218400 | -1.34956100 |
| C | -4.52007400 | -2.35964500 | 1.06260100  |
| C | -5.39503500 | -3.43324900 | 0.83060000  |
| C | -1.65140000 | -0.73227000 | -2.80329500 |
| C | -2.98960100 | -0.50863100 | -3.11256900 |
| C | -3.30763000 | 0.38042000  | -4.15056800 |
| C | -2.30600700 | 0.87843700  | -4.97889100 |
| C | -0.98887900 | 0.45722300  | -4.77963400 |
| C | -0.62092000 | -0.34848300 | -3.68730100 |
| H | -5.77850700 | -3.97551200 | 1.68971100  |
| H | -0.21542300 | 0.75841300  | -5.47965700 |
| C | -4.25926200 | -1.23718800 | -2.67894200 |
| C | -4.50863600 | -2.42691100 | -3.67560900 |
| H | -3.58348200 | -3.00814700 | -3.76260000 |
| H | -4.77906000 | -2.08108500 | -4.67722200 |
| H | -5.24140400 | 0.17741800  | -5.12106300 |
| H | -5.06264000 | 1.67262600  | -4.21353900 |

|   |             |             |             |
|---|-------------|-------------|-------------|
| C | -4.02222500 | -1.66951000 | -0.05986300 |
| H | -6.42175600 | -4.66834700 | -0.60781700 |
| H | -2.54502200 | 1.54552500  | -5.80346100 |
| C | -5.59408400 | -3.28723000 | -3.00469200 |
| H | -5.53788700 | -4.34304400 | -3.29241700 |
| H | -6.60289000 | -2.94052200 | -3.26991000 |
| C | -4.80554900 | 0.60700300  | -4.20904500 |
| C | -5.31776700 | -0.11715100 | -2.93880600 |
| H | -5.32156600 | 0.57318600  | -2.08750800 |
| H | -6.33064900 | -0.51643800 | -3.05025500 |
| C | 0.77321000  | -0.87898400 | -3.56057100 |
| C | 1.88201900  | -0.00746500 | -3.42314200 |
| C | 0.98254500  | -2.28114100 | -3.65819000 |
| C | 1.75752600  | 1.41839000  | -3.37050400 |
| C | 3.21659000  | -0.55701500 | -3.32970700 |
| C | 2.31770100  | -2.81440000 | -3.51822700 |
| C | 2.85661600  | 2.23117300  | -3.25715700 |
| H | 0.77032300  | 1.85798700  | -3.43224100 |
| C | 4.33498300  | 0.32501600  | -3.19612900 |
| C | 3.39585400  | -1.94195300 | -3.35382700 |
| C | 4.16677500  | 1.68245800  | -3.16419800 |
| H | 2.73043600  | 3.31016700  | -3.22693100 |
| H | 5.32451500  | -0.11622100 | -3.10756500 |
| H | 4.39720000  | -2.34977300 | -3.24462900 |
| H | 5.02079400  | 2.34336600  | -3.05242100 |
| C | -4.26225700 | -1.96497900 | 2.48486600  |
| C | -3.48080300 | -2.78961300 | 3.32854200  |
| C | -4.93847900 | -0.83692800 | 3.01371800  |
| C | -2.77626100 | -3.94075300 | 2.85076600  |
| C | -3.37300300 | -2.47119600 | 4.73527600  |
| C | -4.80356100 | -0.51872200 | 4.41756300  |
| C | -2.04230000 | -4.72651400 | 3.69947000  |
| H | -2.80736300 | -4.17125100 | 1.79291600  |
| C | -2.59795400 | -3.31989200 | 5.58624000  |
| C | -4.02976200 | -1.34485700 | 5.23778000  |
| C | -1.95517600 | -4.41938200 | 5.08714100  |
| H | -1.50278500 | -5.58335100 | 3.30775900  |
| H | -2.53034000 | -3.06715900 | 6.64172400  |
| H | -3.94367500 | -1.10972400 | 6.29690300  |
| H | -1.36563900 | -5.05508300 | 5.74187800  |
| C | 0.17458500  | -4.56354800 | -4.01182400 |
| H | -0.64375800 | -5.24476300 | -4.23008400 |
| C | -0.06640800 | -3.21671700 | -3.93272200 |
| H | -1.07086300 | -2.84689200 | -4.10236900 |

|   |              |              |              |
|---|--------------|--------------|--------------|
| C | 1. 48303200  | -5. 08454700 | -3. 80887900 |
| H | 1. 65073800  | -6. 15707500 | -3. 85392400 |
| C | 2. 52326100  | -4. 22844200 | -3. 57170400 |
| H | 3. 53255400  | -4. 60361600 | -3. 42286900 |
| C | -6. 43063400 | 1. 08625000  | 2. 76810800  |
| H | -7. 07237000 | 1. 70304700  | 2. 14451000  |
| C | -6. 27206600 | 1. 41006300  | 4. 14575100  |
| H | -6. 78769300 | 2. 27226600  | 4. 55986300  |
| C | -5. 48340300 | 0. 62477500  | 4. 94341900  |
| H | -5. 36592300 | 0. 85024500  | 6. 00095200  |
| C | -5. 78971800 | 0. 00309400  | 2. 22424700  |
| H | -5. 93282800 | -0. 23328800 | 1. 17566400  |
| C | 1. 16203200  | 2. 11134800  | 3. 10669800  |
| H | 1. 43235700  | 1. 08063400  | 2. 86501200  |
| H | 2. 00344000  | 2. 76556600  | 2. 87836300  |
| H | 0. 99238100  | 2. 13258400  | 4. 19523500  |
| C | -1. 15357900 | 0. 42258000  | 3. 30940100  |
| H | -0. 24651600 | -0. 16953300 | 3. 18439100  |
| H | -1. 23892600 | 0. 69533700  | 4. 37003300  |
| H | -1. 99465100 | -0. 22927400 | 3. 07041000  |
| C | 0. 04435100  | 6. 02566700  | 0. 50497700  |
| C | -0. 33265200 | 6. 84197100  | 1. 58326000  |
| C | 0. 55498300  | 6. 67308300  | -0. 63488300 |
| C | -0. 20099500 | 8. 23162500  | 1. 53228300  |
| H | -0. 73424200 | 6. 41006200  | 2. 49298100  |
| C | 0. 68906500  | 8. 05974000  | -0. 69094200 |
| H | 0. 85710000  | 6. 09465400  | -1. 50000500 |
| C | 0. 31096600  | 8. 85062700  | 0. 39441600  |
| H | -0. 49838800 | 8. 82623200  | 2. 39212800  |
| H | 1. 09516600  | 8. 52005000  | -1. 58786300 |
| H | 0. 41878800  | 9. 93105900  | 0. 35448200  |
| C | -1. 48753400 | 4. 12541800  | -0. 17814300 |
| H | -1. 59880000 | 3. 03592100  | -0. 16469600 |
| H | -2. 26778700 | 4. 52596100  | 0. 47290800  |
| C | -1. 74349300 | 4. 59980300  | -1. 60096100 |
| C | -2. 44571400 | 5. 71574300  | -1. 89631700 |
| C | -1. 23323600 | 3. 67802700  | -2. 69805200 |
| H | -0. 34973200 | 4. 07709100  | -3. 21696900 |
| H | -0. 95887000 | 2. 70270400  | -2. 28760800 |
| H | -1. 98961800 | 3. 48890600  | -3. 46591200 |
| C | -2. 70532100 | 6. 16347900  | -3. 31859600 |
| H | -2. 37599500 | 7. 20318300  | -3. 45280600 |
| H | -2. 19918100 | 5. 55892700  | -4. 07284200 |
| H | -3. 78228500 | 6. 15279200  | -3. 54127800 |

|   |             |            |             |
|---|-------------|------------|-------------|
| C | -3.04864700 | 6.66627600 | -0.88813100 |
| H | -3.02991500 | 6.30256900 | 0.13996500  |
| H | -2.51644000 | 7.62690600 | -0.89956300 |
| H | -4.09365100 | 6.88148400 | -1.15141700 |
| C | -2.65363300 | 2.20263500 | 2.32832400  |
| H | -2.73639600 | 3.20351300 | 1.91165500  |
| H | -3.25443100 | 1.52938700 | 1.71200900  |
| H | -3.10821800 | 2.20841100 | 3.32682900  |

TS-1-2-7SS-1

l imaginary frequency

H = -5472.458992

G = -5472.670617

E(M06-2X-DCM) = -5473.443575

|   |             |             |             |
|---|-------------|-------------|-------------|
| O | 1.64287300  | -1.13714700 | 1.63077000  |
| O | 3.38959600  | 0.04365100  | 0.08472300  |
| P | 1.84263600  | -0.43021400 | 0.18523700  |
| O | 1.04354600  | 0.88383800  | 0.05372000  |
| N | 1.59652700  | -1.57382300 | -0.90535600 |
| S | 0.14002400  | -2.15942700 | -1.19554200 |
| C | 0.33178100  | -3.96972700 | -0.77517100 |
| F | 0.80841100  | -4.10888500 | 0.46119100  |
| F | 1.17320100  | -4.55561100 | -1.63537200 |
| F | -0.86297200 | -4.55909000 | -0.86213400 |
| C | -1.00032700 | 4.31065800  | -0.59999200 |
| C | -0.81508200 | 3.76685400  | -2.07519900 |
| H | -0.18945000 | 4.49981500  | -2.59956900 |
| H | -1.80832700 | 3.81042100  | -2.52578300 |
| C | -0.25768400 | 2.40400900  | -2.44712500 |
| C | -1.56840800 | 3.20110700  | 0.36745700  |
| H | -0.85191200 | 3.04302900  | 1.17337100  |
| H | -2.49654900 | 3.54735400  | 0.81387800  |
| N | -1.84475100 | 1.87661300  | -0.18468100 |
| C | -3.11491100 | 1.45980600  | -0.51555800 |
| N | -3.20083600 | 0.09786900  | -0.63984500 |
| C | -4.29667000 | -0.75661600 | -0.87532100 |
| C | -5.51895700 | -0.37524400 | -1.44719800 |
| C | -4.10683900 | -2.10240200 | -0.51403500 |
| C | -6.52565800 | -1.32735800 | -1.62232400 |
| C | -5.12816800 | -3.03098600 | -0.68697900 |
| H | -3.15693000 | -2.41698700 | -0.09720400 |
| C | -6.35263500 | -2.65614300 | -1.24051600 |
| H | -7.14776400 | -3.37953400 | -1.37155600 |
| C | -4.92340300 | -4.43367000 | -0.18360400 |

|   |             |             |             |
|---|-------------|-------------|-------------|
| C | -7.80543000 | -0.91405600 | -2.30258200 |
| F | -5.19536800 | -4.52437600 | 1.15148100  |
| F | -5.73051400 | -5.32184400 | -0.79936500 |
| F | -3.65155600 | -4.85403700 | -0.34114900 |
| F | -8.84595700 | -1.69514800 | -1.93159200 |
| F | -8.13826900 | 0.36350500  | -2.02477000 |
| F | -7.70498100 | -1.01066600 | -3.64961300 |
| S | -4.35895400 | 2.56341600  | -0.77887800 |
| H | -5.68514000 | 0.65283800  | -1.73255600 |
| C | 1.08919100  | 2.02871500  | -2.39179800 |
| H | -2.35029400 | -0.42719300 | -0.42613700 |
| O | -0.88946500 | -1.66610100 | -0.24055800 |
| H | -1.17713000 | 1.16144400  | 0.09404200  |
| O | -0.20110400 | -2.12604800 | -2.62187300 |
| H | 0.93721300  | 1.46178900  | -1.14206400 |
| C | 6.47314800  | -2.75955800 | 0.57283900  |
| C | 5.82920700  | -2.21660400 | 1.67780200  |
| C | 4.84424200  | -1.22499400 | 1.52711800  |
| C | 5.13222400  | -1.33794500 | -0.89778200 |
| C | 6.14318900  | -2.29238600 | -0.69702900 |
| C | 1.79773300  | -0.50210400 | 2.86868300  |
| C | 3.07591300  | -0.15345100 | 3.29735000  |
| C | 3.21411200  | 0.66647800  | 4.42819700  |
| C | 2.10818700  | 0.96877600  | 5.21650800  |
| C | 0.86722700  | 0.42688000  | 4.87779900  |
| C | 0.67005100  | -0.30824000 | 3.69445000  |
| H | 6.66766300  | -2.67276900 | -1.56833700 |
| H | 0.01723000  | 0.57631600  | 5.53637800  |
| C | 4.45318400  | -0.67740300 | 2.89811700  |
| C | 4.79222400  | -1.92301500 | 3.79337600  |
| H | 3.95162700  | -2.62493000 | 3.74693700  |
| H | 4.94206300  | -1.65343600 | 4.84258500  |
| H | 5.08841900  | 0.58992000  | 5.52385200  |
| H | 4.78839800  | 2.13984500  | 4.75014700  |
| C | 4.45441900  | -0.85830100 | 0.23973300  |
| H | 7.23422700  | -3.52598400 | 0.69417000  |
| H | 2.21086800  | 1.57876600  | 6.11050700  |
| C | 6.03110900  | -2.55766100 | 3.13568000  |
| H | 6.09836800  | -3.63744700 | 3.30966200  |
| H | 6.96125500  | -2.11711400 | 3.52144700  |
| C | 4.66479200  | 1.05780700  | 4.62495700  |
| C | 5.34284500  | 0.53079200  | 3.33737800  |
| H | 5.31105600  | 1.29744700  | 2.55458900  |
| H | 6.38945900  | 0.24773100  | 3.48556200  |

|   |             |             |             |
|---|-------------|-------------|-------------|
| C | -0.65591100 | -0.94148200 | 3.41223300  |
| C | -1.83085300 | -0.15372500 | 3.30931600  |
| C | -0.74581300 | -2.35786900 | 3.34519900  |
| C | -1.83380700 | 1.27382300  | 3.43145700  |
| C | -3.10617300 | -0.79808400 | 3.08250800  |
| C | -2.01875800 | -2.98005900 | 3.06158800  |
| C | -2.99849600 | 1.99628700  | 3.38214100  |
| H | -0.89113400 | 1.78872600  | 3.57179200  |
| C | -4.29415900 | -0.00488700 | 3.01502700  |
| C | -3.16099300 | -2.18583300 | 2.93300100  |
| C | -4.25051000 | 1.35360000  | 3.17103200  |
| H | -2.96611700 | 3.07679500  | 3.49487400  |
| H | -5.23898100 | -0.51212600 | 2.83736200  |
| H | -4.11516800 | -2.66183400 | 2.72148800  |
| H | -5.15925300 | 1.94509700  | 3.11658100  |
| C | 4.91639100  | -0.83718200 | -2.29236700 |
| C | 4.39523300  | -1.70088700 | -3.28580700 |
| C | 5.38067900  | 0.45639500  | -2.64126200 |
| C | 3.88187800  | -3.00404300 | -2.98799300 |
| C | 4.35791700  | -1.26303300 | -4.66347000 |
| C | 5.31467600  | 0.88878600  | -4.01954600 |
| C | 3.39547200  | -3.81875900 | -3.97619500 |
| H | 3.85116400  | -3.33117500 | -1.95600100 |
| C | 3.85041300  | -2.14907500 | -5.66483100 |
| C | 4.81604300  | 0.01587400  | -4.99080800 |
| C | 3.38746700  | -3.39347300 | -5.33506100 |
| H | 2.99235000  | -4.79371900 | -3.71929500 |
| H | 3.83674300  | -1.80578300 | -6.69658500 |
| H | 4.78556200  | 0.34016100  | -6.02925300 |
| H | 2.99866900  | -4.05615700 | -6.10323800 |
| C | 0.23783100  | -4.59089600 | 3.51585700  |
| H | 1.09847600  | -5.22288400 | 3.71891400  |
| C | 0.36360400  | -3.22847500 | 3.59272900  |
| H | 1.31949500  | -2.79845500 | 3.86838900  |
| C | -1.00366000 | -5.19127800 | 3.16550700  |
| H | -1.07693400 | -6.27217500 | 3.08356700  |
| C | -2.10093900 | -4.40386300 | 2.94756800  |
| H | -3.05940500 | -4.84139000 | 2.68314600  |
| C | 6.38247800  | 2.61181100  | -2.06222600 |
| H | 6.80784900  | 3.27945900  | -1.31765900 |
| C | 6.29268000  | 3.04051400  | -3.41715500 |
| H | 6.64365500  | 4.03094600  | -3.69375800 |
| C | 5.77772700  | 2.19750400  | -4.36499900 |
| H | 5.71690200  | 2.50500100  | -5.40649200 |



|   |             |             |             |
|---|-------------|-------------|-------------|
| C | 5.94688500  | 1.36625900  | -1.69020600 |
| H | 6.03699400  | 1.05490200  | -0.65563800 |
| C | -1.23375100 | 1.48513900  | -3.13378700 |
| H | -1.10368400 | 0.43251500  | -2.87045900 |
| H | -2.26925500 | 1.77577100  | -2.96060400 |
| H | -1.03743300 | 1.54735000  | -4.21599400 |
| C | 1.55963200  | 0.83564300  | -3.23079600 |
| H | 0.90650900  | -0.03475600 | -3.20161400 |
| H | 1.65819500  | 1.15447500  | -4.27735700 |
| H | 2.54591500  | 0.51362700  | -2.89550100 |
| C | -1.96051500 | 5.52746400  | -0.67369800 |
| C | -2.07789500 | 6.31964500  | -1.82783900 |
| C | -2.69841400 | 5.93631700  | 0.45044900  |
| C | -2.90442100 | 7.44484000  | -1.86662700 |
| H | -1.52751000 | 6.07132600  | -2.72841000 |
| C | -3.52763300 | 7.05633600  | 0.41703300  |
| H | -2.61862100 | 5.39185300  | 1.38469800  |
| C | -3.64057500 | 7.81861300  | -0.74498700 |
| H | -2.97154200 | 8.02426900  | -2.78382900 |
| H | -4.08782600 | 7.33049400  | 1.30722300  |
| H | -4.29012100 | 8.68906100  | -0.77462400 |
| C | 0.40041800  | 4.80430800  | -0.05740700 |
| H | 1.03819600  | 3.92304900  | 0.02499800  |
| H | 0.83353300  | 5.43351300  | -0.84650500 |
| C | 0.47803900  | 5.61701600  | 1.22808600  |
| C | 0.92869100  | 5.11748100  | 2.40014700  |
| C | 0.19878700  | 7.11039600  | 1.07946300  |
| H | 1.09437000  | 7.70013600  | 1.31502300  |
| H | -0.09770900 | 7.36018800  | 0.05913600  |
| H | -0.60524200 | 7.46389300  | 1.73310100  |
| C | 1.08416400  | 5.97834900  | 3.63612500  |
| H | 2.14656700  | 6.08765000  | 3.90040500  |
| H | 0.66354200  | 6.97937600  | 3.53114200  |
| H | 0.60198500  | 5.50132500  | 4.50049400  |
| C | 1.40035100  | 3.70231800  | 2.63896100  |
| H | 1.32072200  | 3.03326400  | 1.78124600  |
| H | 2.45492600  | 3.71031500  | 2.95182000  |
| H | 0.85200900  | 3.24192100  | 3.47091800  |
| C | 2.22927500  | 3.03201700  | -2.19993900 |
| H | 1.89932700  | 4.03615900  | -1.94579700 |
| H | 2.92974700  | 2.69398700  | -1.42950000 |
| H | 2.79908500  | 3.09001500  | -3.13506000 |

l imaginary frequency

H = -5472.463334

G = -5472.675289

E(M06-2X-DCM) = -5473.447255

|   |             |             |             |
|---|-------------|-------------|-------------|
| O | 1.31809000  | -1.28161000 | 1.79101200  |
| O | 3.10074500  | -0.79266900 | -0.05275600 |
| P | 1.49905100  | -0.84379000 | 0.23520500  |
| O | 1.01420100  | 0.59103900  | -0.01804900 |
| N | 0.89529400  | -2.03275500 | -0.64700700 |
| S | -0.68235200 | -2.25664200 | -0.77409500 |
| C | -0.90713600 | -3.96374900 | -0.04988900 |
| F | -0.45772500 | -3.99407200 | 1.20534100  |
| F | -0.23546500 | -4.87011400 | -0.77295000 |
| F | -2.20554400 | -4.27329300 | -0.06418300 |
| C | 0.07429700  | 4.43265100  | -0.90326500 |
| C | 0.40373800  | 3.85414100  | -2.33605500 |
| H | 1.41962700  | 4.16268200  | -2.59345600 |
| H | -0.27500600 | 4.36193800  | -3.02831800 |
| C | 0.25576800  | 2.38520600  | -2.66489600 |
| C | -1.38334600 | 4.04379700  | -0.50950100 |
| H | -1.60275500 | 4.46182600  | 0.47891600  |
| H | -2.07720500 | 4.52129800  | -1.20192600 |
| N | -1.71286600 | 2.62072600  | -0.52183400 |
| C | -2.99924700 | 2.19530300  | -0.79595700 |
| N | -3.17036500 | 0.84714500  | -0.64289800 |
| C | -4.35124700 | 0.07754700  | -0.80157400 |
| C | -5.28711300 | 0.29436100  | -1.82251200 |
| C | -4.53751600 | -0.99558500 | 0.07742900  |
| C | -6.40515800 | -0.53256500 | -1.92262300 |
| C | -5.65713300 | -1.81947200 | -0.04370800 |
| H | -3.79821500 | -1.19500200 | 0.84298800  |
| C | -6.60755100 | -1.59053000 | -1.03508700 |
| H | -7.48200100 | -2.22352000 | -1.12072200 |
| C | -5.83456600 | -2.93726100 | 0.94734900  |
| C | -7.37350000 | -0.33194000 | -3.05881400 |
| F | -6.13888100 | -2.46389500 | 2.19013800  |
| F | -6.82842200 | -3.78038000 | 0.60104700  |
| F | -4.70817300 | -3.66829800 | 1.08960900  |
| F | -8.63247000 | -0.68410100 | -2.70995600 |
| F | -7.41069000 | 0.95023600  | -3.47633600 |
| F | -7.04264600 | -1.08692900 | -4.13390400 |
| S | -4.20884200 | 3.25205600  | -1.31470600 |
| H | -5.14910400 | 1.10491600  | -2.52224400 |
| C | 1.29621100  | 1.44833800  | -2.55024400 |

|   |             |             |             |
|---|-------------|-------------|-------------|
| H | -2.38831600 | 0.29037200  | -0.28878800 |
| O | -1.46940700 | -1.37619300 | 0.12787400  |
| H | -1.14353500 | 2.01283500  | 0.06304100  |
| O | -1.11520400 | -2.36001700 | -2.17059400 |
| H | 1.01046700  | 1.08960000  | -1.30992300 |
| C | 5.42581500  | -4.20744700 | 0.68042300  |
| C | 5.06844700  | -3.35656500 | 1.71934100  |
| C | 4.35111900  | -2.17437400 | 1.47018800  |
| C | 4.33029000  | -2.70918300 | -0.91346600 |
| C | 5.08414900  | -3.85870000 | -0.62437900 |
| C | 1.75339900  | -0.49403100 | 2.86101400  |
| C | 3.11667000  | -0.42017700 | 3.13469000  |
| C | 3.57647100  | 0.52519000  | 4.06351900  |
| C | 2.67232800  | 1.25613000  | 4.82833800  |
| C | 1.30565100  | 1.01675100  | 4.67334700  |
| C | 0.80643000  | 0.15112900  | 3.68288100  |
| H | 5.39771300  | -4.48636700 | -1.45317200 |
| H | 0.59550500  | 1.51326300  | 5.32751300  |
| C | 4.26859900  | -1.34236100 | 2.74749800  |
| C | 4.39382100  | -2.47967000 | 3.82283000  |
| H | 3.40604500  | -2.93168300 | 3.96916500  |
| H | 4.73290500  | -2.10122800 | 4.79151800  |
| H | 5.47630200  | 0.13576600  | 5.03971500  |
| H | 5.49630600  | 1.55788600  | 4.00528400  |
| C | 3.92109800  | -1.90804100 | 0.17081800  |
| H | 5.97904800  | -5.12240100 | 0.87593200  |
| H | 3.01963000  | 1.96951300  | 5.57170700  |
| C | 5.34707500  | -3.51470400 | 3.19624700  |
| H | 5.16061900  | -4.53385500 | 3.55317800  |
| H | 6.39693700  | -3.28631200 | 3.42820500  |
| C | 5.09103000  | 0.54331800  | 4.09513500  |
| C | 5.47175500  | -0.35411100 | 2.89330100  |
| H | 5.54468600  | 0.25087000  | 1.98216500  |
| H | 6.42569300  | -0.87357200 | 3.02706100  |
| C | -0.65942700 | -0.13571700 | 3.59944500  |
| C | -1.59096900 | 0.91040200  | 3.37956300  |
| C | -1.12338700 | -1.45742400 | 3.83493200  |
| C | -1.20484600 | 2.27733500  | 3.19200400  |
| C | -3.00660800 | 0.61602900  | 3.35428700  |
| C | -2.53813500 | -1.74212700 | 3.75876900  |
| C | -2.13877600 | 3.27139800  | 3.04137400  |
| H | -0.15029500 | 2.52491200  | 3.18910500  |
| C | -3.94474400 | 1.67809100  | 3.16172700  |
| C | -3.43946300 | -0.70164500 | 3.51979800  |

|   |             |             |             |
|---|-------------|-------------|-------------|
| C | -3.53047200 | 2.97429800  | 3.01978500  |
| H | -1.81615300 | 4.30434900  | 2.93673000  |
| H | -5.00248300 | 1.42900100  | 3.13498200  |
| H | -4.50209600 | -0.92338600 | 3.46443100  |
| H | -4.25249300 | 3.77265000  | 2.87799300  |
| C | 4.10795500  | -2.36487700 | -2.35435800 |
| C | 3.26483900  | -3.16506300 | -3.16226700 |
| C | 4.87122900  | -1.31984900 | -2.93427200 |
| C | 2.46139000  | -4.22439800 | -2.63130500 |
| C | 3.18964100  | -2.91225800 | -4.58442700 |
| C | 4.76527800  | -1.06215800 | -4.35311600 |
| C | 1.66599600  | -4.98782700 | -3.44436000 |
| H | 2.46263500  | -4.39639200 | -1.56229300 |
| C | 2.35178900  | -3.73809400 | -5.39753700 |
| C | 3.93486800  | -1.86768600 | -5.13759600 |
| C | 1.61494200  | -4.75089700 | -4.84742400 |
| H | 1.04917200  | -5.76971900 | -3.01208500 |
| H | 2.31195900  | -3.53741400 | -6.46558700 |
| H | 3.87226400  | -1.68072500 | -6.20795200 |
| H | 0.97718900  | -5.36861800 | -5.47361900 |
| C | -0.74396200 | -3.80497500 | 4.40558900  |
| H | -0.06070500 | -4.60408000 | 4.68094000  |
| C | -0.25881600 | -2.54143600 | 4.19197300  |
| H | 0.80129800  | -2.35217500 | 4.31294900  |
| C | -2.13150500 | -4.08832000 | 4.26661000  |
| H | -2.49339400 | -5.10154000 | 4.41747500  |
| C | -3.00262900 | -3.08073800 | 3.95557400  |
| H | -4.06573300 | -3.27416400 | 3.84662100  |
| C | 6.50304500  | 0.49649400  | -2.77424800 |
| H | 7.18831600  | 1.09284100  | -2.17760200 |
| C | 6.37192300  | 0.76396200  | -4.16673300 |
| H | 6.95097700  | 1.56446900  | -4.61915800 |
| C | 5.52967900  | 0.00054600  | -4.92984500 |
| H | 5.43198300  | 0.18165200  | -5.99788900 |
| C | 5.78235800  | -0.50852200 | -2.18226000 |
| H | 5.90661000  | -0.70415100 | -1.12306400 |
| C | -1.02177100 | 1.97850600  | -3.33779900 |
| H | -1.37727600 | 0.99669000  | -3.01540400 |
| H | -1.82256500 | 2.70712200  | -3.21165100 |
| H | -0.80399700 | 1.88314500  | -4.41431200 |
| C | 1.18320000  | 0.12931200  | -3.32403800 |
| H | 0.23637900  | -0.39459400 | -3.18514900 |
| H | 1.31722100  | 0.31868600  | -4.39739900 |
| H | 1.97242100  | -0.55364400 | -3.00936200 |

|   |             |            |             |
|---|-------------|------------|-------------|
| C | 0.04840300  | 5.98088400 | -0.97476900 |
| C | 0.27863100  | 6.71971800 | -2.14462400 |
| C | -0.25012500 | 6.70838600 | 0.19174100  |
| C | 0.20587700  | 8.11574500 | -2.15328200 |
| H | 0.52786300  | 6.22520600 | -3.07652500 |
| C | -0.33180900 | 8.09889100 | 0.18691100  |
| H | -0.41991800 | 6.18493500 | 1.12627000  |
| C | -0.10446200 | 8.81387600 | -0.98969700 |
| H | 0.39132900  | 8.65159400 | -3.08041100 |
| H | -0.57166500 | 8.62329700 | 1.10809300  |
| H | -0.16674200 | 9.89852100 | -0.99691900 |
| C | 1.09493100  | 3.94611800 | 0.20757700  |
| H | 0.51272600  | 3.73179800 | 1.10449100  |
| H | 1.49354700  | 2.96977500 | -0.08608900 |
| C | 2.27281700  | 4.84355400 | 0.58243100  |
| C | 2.49637600  | 5.26361300 | 1.84708600  |
| C | 3.24710000  | 5.15531100 | -0.53755000 |
| H | 3.92281600  | 4.31101500 | -0.73391800 |
| H | 2.72229600  | 5.37533600 | -1.47147600 |
| H | 3.86802100  | 6.02754300 | -0.32777200 |
| C | 3.72935700  | 6.03608700 | 2.27258000  |
| H | 4.12738900  | 5.61747800 | 3.20681500  |
| H | 4.54067300  | 6.02740600 | 1.54369600  |
| H | 3.47923200  | 7.08517800 | 2.48800500  |
| C | 1.57716200  | 5.02259300 | 3.02533300  |
| H | 0.56091400  | 4.73475000 | 2.75277700  |
| H | 1.97690500  | 4.23730200 | 3.68282500  |
| H | 1.50496200  | 5.93265100 | 3.63576400  |
| C | 2.75234600  | 1.89726400 | -2.39718300 |
| H | 2.86668100  | 2.82524800 | -1.84171400 |
| H | 3.33185800  | 1.12660200 | -1.88556800 |
| H | 3.19693400  | 2.03144200 | -3.39175700 |

TS-1-2-7SS-3

l imaginary frequency

H = -5472.463129

G = -5472.675286

E(M06-2X-DCM) = -5473.446891

|   |             |             |             |
|---|-------------|-------------|-------------|
| O | -1.40859000 | -1.38091300 | -1.69863100 |
| O | -3.17517200 | -0.62445700 | 0.06496100  |
| P | -1.57620700 | -0.72919700 | -0.21948100 |
| O | -1.06910200 | 0.72089800  | -0.16860500 |
| N | -0.96984200 | -1.79057200 | 0.81151600  |
| S | 0.60494400  | -2.03055500 | 0.92649000  |

|   |             |             |             |
|---|-------------|-------------|-------------|
| C | 0.76483300  | -3.84873000 | 0.52793600  |
| F | 0.25374700  | -4.10297400 | -0.67749600 |
| F | 0.11514700  | -4.58517200 | 1.43924700  |
| F | 2.05747700  | -4.18145600 | 0.54099300  |
| C | 0.36383100  | 4.59726300  | 0.30881100  |
| C | 0.01486500  | 4.17876400  | 1.78743100  |
| H | -0.93983400 | 4.64827500  | 2.04162700  |
| H | 0.78128200  | 4.62982100  | 2.42363200  |
| C | -0.03763000 | 2.73238700  | 2.23645200  |
| C | 1.73403700  | 3.98074300  | -0.13559800 |
| H | 1.88626500  | 4.21596500  | -1.19455200 |
| H | 2.53124300  | 4.48471300  | 0.41062000  |
| N | 1.95506700  | 2.55516400  | 0.07883400  |
| C | 3.19912600  | 2.07875000  | 0.45123600  |
| N | 3.27840400  | 0.71581800  | 0.44038100  |
| C | 4.39514800  | -0.11105200 | 0.71823200  |
| C | 5.29878200  | 0.12819700  | 1.76317600  |
| C | 4.54621400  | -1.25877000 | -0.06634400 |
| C | 6.35413800  | -0.75603100 | 1.97886900  |
| C | 5.60573600  | -2.13653100 | 0.16739100  |
| H | 3.82993200  | -1.46723900 | -0.85224400 |
| C | 6.52549400  | -1.89005300 | 1.18215600  |
| H | 7.35530100  | -2.56467500 | 1.35268300  |
| C | 5.74836600  | -3.33196400 | -0.73288300 |
| C | 7.28810100  | -0.52970700 | 3.13879500  |
| F | 6.01990800  | -2.95654600 | -2.01566300 |
| F | 6.74367300  | -4.15581900 | -0.34808600 |
| F | 4.61201500  | -4.06065100 | -0.78578100 |
| F | 8.54474200  | -0.94337200 | 2.85437400  |
| F | 7.35779400  | 0.76995300  | 3.49233800  |
| F | 6.89276500  | -1.21733200 | 4.23693800  |
| S | 4.46683500  | 3.09326600  | 0.91418700  |
| H | 5.18401500  | 0.99915800  | 2.39087900  |
| C | -1.19660400 | 1.94283600  | 2.21701700  |
| H | 2.46757000  | 0.17852600  | 0.12081700  |
| O | 1.37912200  | -1.35701900 | -0.14952100 |
| H | 1.36140900  | 1.91556600  | -0.44338200 |
| O | 1.09211000  | -1.88129300 | 2.30197300  |
| H | -0.98056000 | 1.37797400  | 1.02084200  |
| C | -5.45021400 | -4.15209000 | -0.00764400 |
| C | -5.10807300 | -3.50623600 | -1.18920500 |
| C | -4.41673700 | -2.28267800 | -1.17028900 |
| C | -4.38165800 | -2.36085400 | 1.27107200  |
| C | -5.11698500 | -3.55617200 | 1.20631800  |

|   |             |             |             |
|---|-------------|-------------|-------------|
| C | -1.88371800 | -0.79688900 | -2.87588100 |
| C | -3.24921200 | -0.82907700 | -3.14565900 |
| C | -3.74873000 | -0.08857700 | -4.22840800 |
| C | -2.87845900 | 0.53327300  | -5.11807100 |
| C | -1.50294100 | 0.39056000  | -4.93011800 |
| C | -0.96782100 | -0.26310700 | -3.80573900 |
| H | -5.41868200 | -4.02170800 | 2.13970800  |
| H | -0.81435200 | 0.79715300  | -5.66453900 |
| C | -4.36311800 | -1.70534900 | -2.58276900 |
| C | -4.44999900 | -3.02846700 | -3.42248700 |
| H | -3.44903800 | -3.47132500 | -3.48094800 |
| H | -4.79576400 | -2.85111100 | -4.44499700 |
| H | -5.62974200 | -0.73339800 | -5.09969500 |
| H | -5.71010400 | 0.85643100  | -4.35213100 |
| C | -3.98794200 | -1.77025100 | 0.05400700  |
| H | -5.98459500 | -5.09841800 | -0.02530700 |
| H | -3.25729800 | 1.08834300  | -5.97260500 |
| C | -5.37690400 | -3.95086500 | -2.60843900 |
| H | -5.16032700 | -5.01382400 | -2.76344300 |
| H | -6.43162400 | -3.80115000 | -2.87901600 |
| C | -5.26249700 | -0.13914800 | -4.25191800 |
| C | -5.60497000 | -0.80872900 | -2.90024800 |
| H | -5.70055700 | -0.04647100 | -2.11821400 |
| H | -6.53799100 | -1.37996900 | -2.92450700 |
| C | 0.50849000  | -0.46961700 | -3.68754100 |
| C | 1.39393700  | 0.63638300  | -3.64401400 |
| C | 1.02561200  | -1.79158500 | -3.71816700 |
| C | 0.94875900  | 1.99870300  | -3.67616600 |
| C | 2.82144700  | 0.40739700  | -3.58309700 |
| C | 2.45158800  | -2.00368300 | -3.62126900 |
| C | 1.83962300  | 3.04216800  | -3.69943300 |
| H | -0.11534500 | 2.20221400  | -3.70646200 |
| C | 3.71297900  | 1.52569400  | -3.57184500 |
| C | 3.30880400  | -0.90197900 | -3.54939700 |
| C | 3.24308400  | 2.80913000  | -3.64232100 |
| H | 1.47026200  | 4.06286900  | -3.76334100 |
| H | 4.78076000  | 1.33013500  | -3.51545800 |
| H | 4.38115700  | -1.07039400 | -3.47877900 |
| H | 3.93230300  | 3.64841700  | -3.64463200 |
| C | -4.15731000 | -1.75795400 | 2.62332600  |
| C | -3.32500700 | -2.40941100 | 3.56563200  |
| C | -4.90746400 | -0.61550800 | 3.00195300  |
| C | -2.52092800 | -3.54651300 | 3.23309800  |
| C | -3.25749200 | -1.91230000 | 4.92201400  |

|   |             |             |             |
|---|-------------|-------------|-------------|
| C | -4.80933400 | -0.11496200 | 4.35501600  |
| C | -1.73316200 | -4.15828300 | 4.17225900  |
| H | -2.51273900 | -3.90049500 | 2.20992600  |
| C | -2.43073700 | -2.58798500 | 5.87349000  |
| C | -3.99724400 | -0.78125800 | 5.27720100  |
| C | -1.69331900 | -3.68274300 | 5.51375700  |
| H | -1.11420700 | -5.00322400 | 3.88604400  |
| H | -2.39841800 | -2.20507600 | 6.89082700  |
| H | -3.94190100 | -0.41103600 | 6.29917000  |
| H | -1.06326000 | -4.18420900 | 6.24316000  |
| C | 0.73699300  | -4.21241900 | -3.90880000 |
| H | 0.08406900  | -5.07109700 | -4.04111000 |
| C | 0.20248000  | -2.95109600 | -3.88512600 |
| H | -0.86604800 | -2.82509100 | -4.01287100 |
| C | 2.13741000  | -4.41452600 | -3.76128300 |
| H | 2.54097800  | -5.42315200 | -3.76479500 |
| C | 2.96955900  | -3.33726000 | -3.62692800 |
| H | 4.04079800  | -3.47268400 | -3.51712400 |
| C | -6.50282400 | 1.17238200  | 2.50748900  |
| H | -7.16965000 | 1.66810300  | 1.80693700  |
| C | -6.38128100 | 1.67562200  | 3.83390400  |
| H | -6.94904300 | 2.55277900  | 4.13211500  |
| C | -5.56101400 | 1.04315000  | 4.72880000  |
| H | -5.46937400 | 1.40652700  | 5.74984700  |
| C | -5.79599700 | 0.06729500  | 2.10880900  |
| H | -5.91413000 | -0.30776500 | 1.09848800  |
| C | 1.18095700  | 2.21818500  | 2.94722300  |
| H | 1.40395700  | 1.17421000  | 2.71153400  |
| H | 2.06802900  | 2.82413300  | 2.76306100  |
| H | 0.96245000  | 2.24279800  | 4.02735700  |
| C | -1.25571100 | 0.72102100  | 3.14179200  |
| H | -0.38007800 | 0.07299600  | 3.08990700  |
| H | -1.37560100 | 1.05413200  | 4.18141500  |
| H | -2.12274700 | 0.11017000  | 2.89211100  |
| C | 0.65365800  | 6.12229500  | 0.24035600  |
| C | 0.74782600  | 6.95735700  | 1.36333600  |
| C | 0.90705700  | 6.70879800  | -1.01314200 |
| C | 1.06888100  | 8.31154400  | 1.24207000  |
| H | 0.55383100  | 6.57572000  | 2.35913900  |
| C | 1.23298400  | 8.05814700  | -1.13943800 |
| H | 0.84367100  | 6.10961400  | -1.91588400 |
| C | 1.31499600  | 8.87157300  | -0.00905000 |
| H | 1.12511400  | 8.92602900  | 2.13668600  |
| H | 1.42199400  | 8.47207500  | -2.12643500 |



|   |             |            |             |
|---|-------------|------------|-------------|
| H | 1.56713300  | 9.92406400 | -0.10321000 |
| C | -0.75314000 | 4.18239600 | -0.70244500 |
| H | -0.33536600 | 4.35574200 | -1.70316800 |
| H | -0.85441600 | 3.09668000 | -0.63203400 |
| C | -2.16225600 | 4.81368700 | -0.66802700 |
| C | -3.18062400 | 4.19446400 | -1.30957900 |
| C | -2.34861400 | 6.16587500 | -0.01071100 |
| H | -1.95851500 | 6.19728600 | 1.01122400  |
| H | -1.81802500 | 6.95245300 | -0.55927800 |
| H | -3.39766100 | 6.45795600 | 0.03886400  |
| C | -4.60286700 | 4.71214400 | -1.38727400 |
| H | -5.30750400 | 3.88777800 | -1.21343300 |
| H | -4.84401600 | 5.50180600 | -0.67461100 |
| H | -4.82195800 | 5.09692000 | -2.39400800 |
| C | -3.04001200 | 2.89435200 | -2.06908600 |
| H | -2.01424900 | 2.55946500 | -2.21532900 |
| H | -3.57424000 | 2.08403000 | -1.55441800 |
| H | -3.50168600 | 2.98975500 | -3.06103600 |
| C | -2.57716200 | 2.56573500 | 1.99660100  |
| H | -2.58531500 | 3.37566900 | 1.26858300  |
| H | -3.27726200 | 1.80230200 | 1.64852300  |
| H | -2.96189500 | 2.94392900 | 2.95327200  |

TS-1-2-7SR

l imaginary frequency

H = -5472.467566

G = -5472.678698

E(M06-2X-DCM) = -5473.451811

|   |             |             |             |
|---|-------------|-------------|-------------|
| O | -1.71283300 | -1.28057700 | -1.54551300 |
| O | -3.28544600 | 0.11983800  | 0.00606500  |
| P | -1.75842700 | -0.41050600 | -0.17194700 |
| O | -0.90313900 | 0.86373500  | -0.27540000 |
| N | -1.47108700 | -1.43632000 | 1.02046800  |
| S | -0.00762000 | -2.02595100 | 1.27319400  |
| C | -0.28470800 | -3.86709900 | 1.12057600  |
| F | -0.82334000 | -4.15755800 | -0.06435800 |
| F | -1.10803800 | -4.29662900 | 2.08697300  |
| F | 0.88848300  | -4.49246200 | 1.24011700  |
| C | 0.95768700  | 4.50671400  | -0.39093900 |
| C | 0.67954200  | 4.37461500  | 1.15740800  |
| H | -0.14031900 | 5.06146900  | 1.39413600  |
| H | 1.57370300  | 4.75261200  | 1.65718900  |
| C | 0.38358300  | 3.04052700  | 1.81304500  |
| C | 2.08289300  | 3.54508800  | -0.85700900 |

|   |              |              |              |
|---|--------------|--------------|--------------|
| H | 2. 11887200  | 3. 54923600  | -1. 95274500 |
| H | 3. 02815600  | 3. 95909300  | -0. 51084900 |
| N | 2. 08271800  | 2. 16955200  | -0. 36556800 |
| C | 3. 24917200  | 1. 54488500  | 0. 02165500  |
| N | 3. 08784300  | 0. 22061300  | 0. 32134900  |
| C | 4. 06634000  | -0. 70643600 | 0. 76369300  |
| C | 5. 03481200  | -0. 39992600 | 1. 72961500  |
| C | 3. 99826500  | -2. 00679000 | 0. 25449200  |
| C | 5. 93714600  | -1. 37968300 | 2. 13962500  |
| C | 4. 90253100  | -2. 97938000 | 0. 68426100  |
| H | 3. 22803100  | -2. 26085800 | -0. 46261800 |
| C | 5. 88678600  | -2. 67483400 | 1. 61981600  |
| H | 6. 59549400  | -3. 42725600 | 1. 94288300  |
| C | 4. 80641600  | -4. 35504800 | 0. 08429800  |
| C | 6. 93603000  | -1. 06199000 | 3. 22096100  |
| F | 5. 14753100  | -4. 35022000 | -1. 23675700 |
| F | 5. 62019800  | -5. 24223400 | 0. 69160500  |
| F | 3. 54886900  | -4. 84362700 | 0. 14604900  |
| F | 8. 08781800  | -1. 75223000 | 3. 05504500  |
| F | 7. 24954200  | 0. 24993000  | 3. 25619700  |
| F | 6. 46231500  | -1. 38666200 | 4. 44798400  |
| S | 4. 72669000  | 2. 35641500  | 0. 15734400  |
| C | 1. 52172400  | 5. 97020100  | -0. 67594500 |
| H | 0. 72796200  | 6. 68199400  | -0. 43141800 |
| H | 1. 63568300  | 6. 02631500  | -1. 76247900 |
| H | 5. 08900800  | 0. 59420000  | 2. 14789900  |
| C | -0. 88825300 | 2. 45619300  | 1. 89074200  |
| H | 2. 18819800  | -0. 22588800 | 0. 12531100  |
| O | 0. 94115100  | -1. 71055600 | 0. 17415000  |
| H | 1. 29584600  | 1. 57406300  | -0. 61481900 |
| O | 0. 45116700  | -1. 81024500 | 2. 64880000  |
| H | -0. 76642900 | 1. 70015700  | 0. 78568900  |
| C | -6. 36464200 | -2. 72080700 | 0. 27828300  |
| C | -5. 84986900 | -2. 34831800 | -0. 95711800 |
| C | -4. 87384400 | -1. 34234800 | -1. 05971300 |
| C | -4. 90771400 | -1. 08507100 | 1. 36894700  |
| C | -5. 91569800 | -2. 06233700 | 1. 42044600  |
| C | -2. 01096800 | -0. 79505500 | -2. 82097000 |
| C | -3. 33681700 | -0. 51972500 | -3. 14898000 |
| C | -3. 62020600 | 0. 14296400  | -4. 35367400 |
| C | -2. 61562300 | 0. 35812600  | -5. 29202000 |
| C | -1. 32903600 | -0. 11272700 | -5. 02358900 |
| C | -0. 98476400 | -0. 68552500 | -3. 78552800 |
| H | -6. 34177100 | -2. 30565800 | 2. 38909400  |

|   |             |             |             |
|---|-------------|-------------|-------------|
| H | -0.55967500 | -0.03655900 | -5.78571200 |
| C | -4.64737100 | -0.99696700 | -2.52917800 |
| C | -5.05271400 | -2.36026800 | -3.19491700 |
| H | -4.19574300 | -3.04169900 | -3.14292100 |
| H | -5.32303700 | -2.24592100 | -4.24856300 |
| H | -5.59725600 | -0.11423500 | -5.21362500 |
| H | -5.26426800 | 1.53354600  | -4.69905100 |
| C | -4.35532000 | -0.78392800 | 0.10797000  |
| H | -7.11845500 | -3.50007700 | 0.35518200  |
| H | -2.83243800 | 0.84207100  | -6.24111900 |
| C | -6.19739200 | -2.90255700 | -2.31917600 |
| H | -6.25484600 | -3.99685500 | -2.32566400 |
| H | -7.17462400 | -2.53327500 | -2.66091300 |
| C | -5.09432200 | 0.48186700  | -4.44015400 |
| C | -5.61151500 | 0.12942000  | -3.02569500 |
| H | -5.51191300 | 0.99664800  | -2.36282300 |
| H | -6.66032300 | -0.18253700 | -3.01414600 |
| C | 0.38557000  | -1.24795200 | -3.57493600 |
| C | 1.53598700  | -0.42611300 | -3.69320000 |
| C | 0.53253400  | -2.64136700 | -3.34177700 |
| C | 1.47908800  | 0.96958700  | -4.01336400 |
| C | 2.84859400  | -1.00217500 | -3.49832100 |
| C | 1.84933900  | -3.19512200 | -3.12439800 |
| C | 2.61674500  | 1.72555000  | -4.14496400 |
| H | 0.51350900  | 1.43168800  | -4.17670700 |
| C | 4.00760600  | -0.17306300 | -3.61865800 |
| C | 2.96817400  | -2.36131000 | -3.19794800 |
| C | 3.90300900  | 1.15327800  | -3.93792200 |
| H | 2.53512700  | 2.77641300  | -4.41095500 |
| H | 4.98111300  | -0.62674500 | -3.45134300 |
| H | 3.95492800  | -2.78286500 | -3.02290600 |
| H | 4.79152100  | 1.77098400  | -4.02626600 |
| C | -4.57416800 | -0.37160000 | 2.64308200  |
| C | -3.93712600 | -1.06113300 | 3.70316300  |
| C | -5.04913400 | 0.95077300  | 2.83436400  |
| C | -3.42082000 | -2.38922400 | 3.56365900  |
| C | -3.78008200 | -0.41037600 | 4.98520000  |
| C | -4.86200500 | 1.59713300  | 4.11421600  |
| C | -2.81844100 | -3.03072600 | 4.61360800  |
| H | -3.47918000 | -2.87446400 | 2.59763800  |
| C | -3.15343300 | -1.12006300 | 6.05707600  |
| C | -4.24128900 | 0.89786900  | 5.15317400  |
| C | -2.69014600 | -2.39519800 | 5.88120000  |
| H | -2.41324400 | -4.02800700 | 4.47238700  |

|   |             |             |             |
|---|-------------|-------------|-------------|
| H | -3.04987300 | -0.61747300 | 7.01589400  |
| H | -4.11925200 | 1.38299100  | 6.11978200  |
| H | -2.20983600 | -2.92281400 | 6.70059900  |
| C | -0.38530200 | -4.89810600 | -3.12880800 |
| H | -1.24062700 | -5.56819800 | -3.15315100 |
| C | -0.56644800 | -3.55893400 | -3.35483100 |
| H | -1.56128900 | -3.18682500 | -3.56954400 |
| C | 0.90813000  | -5.42480500 | -2.85695800 |
| H | 1.02824600  | -6.48605000 | -2.65792900 |
| C | 1.99426500  | -4.59343400 | -2.85897800 |
| H | 2.99006600  | -4.97559500 | -2.65599600 |
| C | -6.18949600 | 2.96355800  | 2.03805900  |
| H | -6.71498300 | 3.49432700  | 1.24860200  |
| C | -5.97764700 | 3.60419000  | 3.29189200  |
| H | -6.33677400 | 4.61794900  | 3.44716600  |
| C | -5.33605600 | 2.93405500  | 4.29856300  |
| H | -5.18113600 | 3.40427200  | 5.26703400  |
| C | -5.74493900 | 1.68520500  | 1.81954300  |
| H | -5.92726900 | 1.21154200  | 0.86150500  |
| C | -0.34275000 | 4.40349600  | -1.21458400 |
| C | -1.34737500 | 5.38300900  | -1.08603400 |
| C | -0.56128100 | 3.38854700  | -2.15171500 |
| C | -2.50346600 | 5.35357500  | -1.86224800 |
| H | -1.23850600 | 6.18673600  | -0.36316900 |
| C | -1.72128600 | 3.34836900  | -2.93097300 |
| H | 0.17111800  | 2.60396300  | -2.28870400 |
| C | -2.69519000 | 4.33347800  | -2.79585000 |
| H | -3.25381100 | 6.12971100  | -1.73558700 |
| H | -1.85854300 | 2.53824300  | -3.64086600 |
| H | -3.59471200 | 4.30735600  | -3.40513900 |
| C | 2.78960400  | 6.44009900  | 0.01909100  |
| C | 4.01106900  | 6.40991300  | -0.55920500 |
| C | 2.59613500  | 7.05955000  | 1.40130300  |
| H | 1.53375000  | 7.15959600  | 1.64474200  |
| H | 3.05740600  | 6.47023600  | 2.20474100  |
| H | 3.02933800  | 8.06484300  | 1.45959900  |
| C | 1.51855700  | 2.43196800  | 2.58587500  |
| H | 1.53929000  | 1.34090700  | 2.52875100  |
| H | 2.49049400  | 2.82522000  | 2.28590500  |
| H | 1.35978000  | 2.67701700  | 3.64870800  |
| C | -1.13670600 | 1.39655900  | 2.97152900  |
| H | -0.38563400 | 0.60674400  | 3.01480900  |
| H | -1.18068300 | 1.88078100  | 3.95618200  |
| H | -2.09835900 | 0.91293500  | 2.80143200  |

|   |             |            |             |
|---|-------------|------------|-------------|
| C | 5.25730500  | 6.89700500 | 0.14549300  |
| H | 6.02260200  | 6.10957600 | 0.13760700  |
| H | 5.69093400  | 7.75816800 | -0.38305000 |
| H | 5.09308600  | 7.18699200 | 1.18440900  |
| C | 4.30978700  | 5.88908600 | -1.94664700 |
| H | 4.83897800  | 4.92816900 | -1.88719100 |
| H | 3.42432800  | 5.74113700 | -2.56851900 |
| H | 4.97408000  | 6.58642400 | -2.47417700 |
| C | -2.15483000 | 3.25133900 | 1.56803500  |
| H | -2.01379100 | 3.99793500 | 0.79047000  |
| H | -2.94830200 | 2.57651800 | 1.23949100  |
| H | -2.51181500 | 3.74838100 | 2.47996700  |

TS-1-2-7SR-1

l imaginary frequency

H = -5472.468087

G = -5472.679258

E(M06-2X-DCM) = -5473.451356

|   |             |             |             |
|---|-------------|-------------|-------------|
| O | 1.55423300  | -0.79387800 | 1.86638300  |
| O | 3.25023500  | -0.05191200 | 0.01958100  |
| P | 1.69202200  | -0.43268600 | 0.28665100  |
| O | 0.90348100  | 0.83747200  | -0.07598200 |
| N | 1.38829400  | -1.78283200 | -0.51374800 |
| S | -0.09641600 | -2.36289100 | -0.62738600 |
| C | 0.07832800  | -4.06292700 | 0.12714800  |
| F | 0.56856200  | -3.97217600 | 1.36411500  |
| F | 0.90319400  | -4.81845700 | -0.61086200 |
| F | -1.12302700 | -4.64325500 | 0.16722100  |
| C | -0.78798200 | 4.38344500  | -1.25435200 |
| C | -0.45787400 | 3.73079800  | -2.66275800 |
| H | 0.39896400  | 4.27923900  | -3.06854400 |
| H | -1.31352600 | 3.95322400  | -3.30791200 |
| C | -0.19381500 | 2.24724300  | -2.83270400 |
| C | -1.95093600 | 3.64851800  | -0.53013400 |
| H | -1.98796800 | 3.98197200  | 0.51130900  |
| H | -2.88561600 | 3.97108300  | -0.98522400 |
| N | -2.00232100 | 2.18912100  | -0.58450100 |
| C | -3.18005300 | 1.51857200  | -0.84054400 |
| N | -3.08821800 | 0.16683700  | -0.66203200 |
| C | -4.09431600 | -0.81804300 | -0.83542400 |
| C | -4.99232600 | -0.82524300 | -1.91166700 |
| C | -4.12703300 | -1.86775800 | 0.08768100  |
| C | -5.92596200 | -1.85375000 | -2.02562100 |
| C | -5.06140600 | -2.89559400 | -0.04710600 |

|   |             |             |             |
|---|-------------|-------------|-------------|
| H | -3.41088100 | -1.88811300 | 0.89946300  |
| C | -5.97660900 | -2.89424200 | -1.09549500 |
| H | -6.70967600 | -3.68554500 | -1.19167800 |
| C | -5.07275500 | -3.98558600 | 0.98899300  |
| C | -6.84846300 | -1.88987000 | -3.21560000 |
| F | -5.45800300 | -3.51191800 | 2.20899600  |
| F | -5.91869700 | -4.98787600 | 0.67654600  |
| F | -3.84673000 | -4.52430600 | 1.16516100  |
| F | -8.04757900 | -2.43180100 | -2.90082100 |
| F | -7.07788700 | -0.66010500 | -3.72088200 |
| F | -6.33563900 | -2.63957200 | -4.22066200 |
| S | -4.58384200 | 2.29539300  | -1.37612100 |
| C | -1.36611700 | 5.82093200  | -1.60397000 |
| H | -2.10650700 | 5.66776600  | -2.39077800 |
| H | -0.56091900 | 6.41087100  | -2.05837300 |
| H | -4.96907100 | -0.03226200 | -2.64426700 |
| C | 1.04969300  | 1.62937400  | -2.63899600 |
| H | -2.23195000 | -0.22113400 | -0.25743700 |
| O | -1.05917800 | -1.66825100 | 0.26625400  |
| H | -1.27334100 | 1.67400200  | -0.09533600 |
| O | -0.50269600 | -2.58869200 | -2.01782100 |
| H | 0.84702400  | 1.28161600  | -1.35599900 |
| C | 6.17668500  | -2.94067200 | 0.86495500  |
| C | 5.63981600  | -2.15695200 | 1.87867700  |
| C | 4.71808600  | -1.13579500 | 1.59110300  |
| C | 4.85301700  | -1.70442100 | -0.78049400 |
| C | 5.80645600  | -2.68281400 | -0.45272200 |
| C | 1.83079400  | 0.08282800  | 2.91829600  |
| C | 3.15689100  | 0.39972700  | 3.20455600  |
| C | 3.43264000  | 1.41896300  | 4.12965900  |
| C | 2.40728000  | 1.98082200  | 4.88411400  |
| C | 1.10683800  | 1.50025300  | 4.72023300  |
| C | 0.77681800  | 0.55546400  | 3.73125100  |
| H | 6.25314800  | -3.25184200 | -1.26247100 |
| H | 0.31527700  | 1.86263800  | 5.36875400  |
| C | 4.45995100  | -0.31040200 | 2.84885300  |
| C | 4.76519000  | -1.38773300 | 3.94955200  |
| H | 3.87386600  | -2.01154600 | 4.08313700  |
| H | 5.00482000  | -0.93875400 | 4.91773300  |
| H | 5.35866800  | 1.38379900  | 5.13089500  |
| H | 5.13996400  | 2.77533700  | 4.07901000  |
| C | 4.27297500  | -0.97878400 | 0.27905800  |
| H | 6.88830700  | -3.73086800 | 1.08988800  |
| H | 2.61548300  | 2.74891100  | 5.62481800  |

|   |             |             |             |
|---|-------------|-------------|-------------|
| C | 5.90761500  | -2.23821100 | 3.36363900  |
| H | 5.90318300  | -3.26886400 | 3.73586600  |
| H | 6.89148700  | -1.81672200 | 3.61357900  |
| C | 4.91951600  | 1.70590100  | 4.17699000  |
| C | 5.46720800  | 0.87714800  | 2.99136100  |
| H | 5.44113900  | 1.47416100  | 2.07247800  |
| H | 6.49652200  | 0.53705600  | 3.14060900  |
| C | -0.61478800 | 0.01285800  | 3.64566300  |
| C | -1.71948200 | 0.87476800  | 3.42173400  |
| C | -0.83329400 | -1.37109600 | 3.87960700  |
| C | -1.59436300 | 2.29368800  | 3.26277100  |
| C | -3.05511100 | 0.32223300  | 3.35879900  |
| C | -2.17070300 | -1.90997800 | 3.78577500  |
| C | -2.69129200 | 3.09750700  | 3.07844500  |
| H | -0.61023200 | 2.74304500  | 3.31169600  |
| C | -4.16853200 | 1.19191000  | 3.13691200  |
| C | -3.24157500 | -1.05309200 | 3.51865700  |
| C | -3.99991800 | 2.54333300  | 3.00569800  |
| H | -2.56013100 | 4.17245800  | 2.98427000  |
| H | -5.15970400 | 0.74953500  | 3.07795700  |
| H | -4.24390000 | -1.46707300 | 3.44008300  |
| H | -4.85438700 | 3.19212700  | 2.83885500  |
| C | 4.60583200  | -1.44116000 | -2.23415700 |
| C | 3.97108900  | -2.41707300 | -3.04013800 |
| C | 5.15818500  | -0.27607700 | -2.82454200 |
| C | 3.37875800  | -3.60283700 | -2.49887200 |
| C | 3.89595600  | -2.22153700 | -4.47118600 |
| C | 5.05290700  | -0.08297000 | -4.25367000 |
| C | 2.78111200  | -4.53159000 | -3.30946200 |
| H | 3.37576900  | -3.74303300 | -1.42533800 |
| C | 3.27110700  | -3.22082100 | -5.28127000 |
| C | 4.43316400  | -1.06175000 | -5.03571800 |
| C | 2.73354000  | -4.34687300 | -4.72041000 |
| H | 2.31791400  | -5.40945800 | -2.86957800 |
| H | 3.22973000  | -3.06011900 | -6.35602700 |
| H | 4.37260700  | -0.91943600 | -6.11304500 |
| H | 2.25555100  | -5.09674900 | -5.34466100 |
| C | -0.04010700 | -3.60668400 | 4.47452300  |
| H | 0.77356600  | -4.26572300 | 4.76570100  |
| C | 0.20935800  | -2.27735100 | 4.25562300  |
| H | 1.21516600  | -1.89724600 | 4.39015100  |
| C | -1.35051500 | -4.13918000 | 4.32110800  |
| H | -1.52405000 | -5.20024000 | 4.47697600  |
| C | -2.38610700 | -3.30957600 | 3.98927700  |

|   |             |             |             |
|---|-------------|-------------|-------------|
| H | -3.39392800 | -3.69536300 | 3.86941700  |
| C | 6.37591700  | 1.84079100  | -2.67635500 |
| H | 6.90026800  | 2.58206600  | -2.07913700 |
| C | 6.24488900  | 2.03793900  | -4.08039800 |
| H | 6.66371900  | 2.92828000  | -4.54153400 |
| C | 5.60496500  | 1.09790800  | -4.84258800 |
| H | 5.51091800  | 1.22662600  | -5.91850900 |
| C | 5.85518100  | 0.72530700  | -2.07297300 |
| H | 5.97686500  | 0.58893100  | -1.00430600 |
| C | 0.49467000  | 4.53202400  | -0.41490500 |
| C | 1.52300900  | 5.39627800  | -0.83856800 |
| C | 0.69056600  | 3.85213700  | 0.79142100  |
| C | 2.67848500  | 5.58469400  | -0.08436900 |
| H | 1.42823200  | 5.93831600  | -1.77551200 |
| C | 1.84948700  | 4.03210800  | 1.55309100  |
| H | -0.05970700 | 3.16512400  | 1.16007100  |
| C | 2.84584400  | 4.90419800  | 1.12351500  |
| H | 3.44737500  | 6.26489500  | -0.44159800 |
| H | 1.96710900  | 3.48155000  | 2.48169300  |
| H | 3.74461600  | 5.05022100  | 1.71670000  |
| C | -1.98370300 | 6.63260600  | -0.47211500 |
| C | -3.31686800 | 6.84438600  | -0.37327900 |
| C | -0.98739700 | 7.24441200  | 0.49629300  |
| H | -0.59429600 | 6.51195300  | 1.21231400  |
| H | -0.11703300 | 7.63038900  | -0.04723200 |
| H | -1.40638700 | 8.07547500  | 1.06596500  |
| C | -1.31756800 | 1.45641700  | -3.43818600 |
| H | -1.39134900 | 0.44232800  | -3.03782400 |
| H | -2.28355800 | 1.95248700  | -3.33860200 |
| H | -1.09669200 | 1.34309600  | -4.51212800 |
| C | 1.29248000  | 0.26515000  | -3.29733000 |
| H | 0.50834300  | -0.47177800 | -3.11854000 |
| H | 1.39864200  | 0.39474000  | -4.38261600 |
| H | 2.22333000  | -0.16327500 | -2.92630900 |
| C | -3.95964700 | 7.62911500  | 0.75300900  |
| H | -4.36531300 | 8.58191800  | 0.38308300  |
| H | -4.81505400 | 7.06839100  | 1.15304500  |
| H | -3.29418400 | 7.84775900  | 1.58901800  |
| C | -4.36359600 | 6.33765500  | -1.34380000 |
| H | -5.09449600 | 7.13181600  | -1.54672400 |
| H | -3.97141900 | 6.00214100  | -2.30541000 |
| H | -4.92340400 | 5.49532300  | -0.91558000 |
| C | 2.34041400  | 2.44300000  | -2.52274700 |
| H | 2.20234500  | 3.41489400  | -2.05586400 |



|   |            |            |             |
|---|------------|------------|-------------|
| H | 3.07930900 | 1.89376600 | -1.93488100 |
| H | 2.76759100 | 2.58567500 | -3.52438200 |

TS-1-2-7SR-2

l imaginary frequency

H = -5472.467373

G = -5472.678369

E(M06-2X-DCM) = -5473.451709

|   |             |             |             |
|---|-------------|-------------|-------------|
| O | -1.62171900 | -1.59537800 | -1.34135000 |
| O | -3.22009000 | -0.04760000 | 0.03584300  |
| P | -1.67686300 | -0.54034600 | -0.10465900 |
| O | -0.87667400 | 0.73841100  | -0.41229300 |
| N | -1.32561400 | -1.36987300 | 1.21536700  |
| S | 0.15857400  | -1.88610500 | 1.50845600  |
| C | -0.07117900 | -3.73782000 | 1.60142500  |
| F | -0.63671400 | -4.19144900 | 0.48181000  |
| F | -0.85372800 | -4.05923500 | 2.64140200  |
| F | 1.12163800  | -4.31504400 | 1.76141900  |
| C | 0.74699400  | 4.41558900  | -1.13090300 |
| C | 0.50925700  | 4.50760800  | 0.42487600  |
| H | -0.36567700 | 5.14722400  | 0.57690600  |
| H | 1.37727900  | 5.04382200  | 0.82083500  |
| C | 0.34634100  | 3.27222100  | 1.28479500  |
| C | 1.92130000  | 3.46243900  | -1.47934300 |
| H | 1.96043600  | 3.33283400  | -2.56811000 |
| H | 2.84804400  | 3.95206300  | -1.19314400 |
| N | 1.98891200  | 2.16175000  | -0.81655500 |
| C | 3.18775300  | 1.64190400  | -0.37826100 |
| N | 3.09073200  | 0.36892800  | 0.11077000  |
| C | 4.11905300  | -0.43628300 | 0.66690400  |
| C | 5.07013600  | 0.05380100  | 1.57234100  |
| C | 4.12005400  | -1.79649700 | 0.34568200  |
| C | 6.02327800  | -0.80924200 | 2.10946400  |
| C | 5.07359900  | -2.65053600 | 0.90271800  |
| H | 3.36453100  | -2.18902100 | -0.32276700 |
| C | 6.04036300  | -2.16593700 | 1.77842200  |
| H | 6.78732400  | -2.82738700 | 2.19950200  |
| C | 5.04506200  | -4.10179700 | 0.50933400  |
| C | 7.00465400  | -0.29043500 | 3.12707200  |
| F | 5.36163600  | -4.27068700 | -0.80691500 |
| F | 5.91827100  | -4.84680300 | 1.21696400  |
| F | 3.81842300  | -4.64247800 | 0.67346000  |
| F | 8.19200000  | -0.93432900 | 3.04896400  |
| F | 7.24646700  | 1.02849600  | 2.97618600  |

|   |             |             |             |
|---|-------------|-------------|-------------|
| F | 6.55083700  | -0.46528500 | 4.39154200  |
| S | 4.63426000  | 2.51841700  | -0.40180300 |
| C | 1.19561600  | 5.86095800  | -1.62973900 |
| H | 0.36157100  | 6.53812600  | -1.44400400 |
| H | 1.26989200  | 5.78606300  | -2.72179300 |
| H | 5.07163400  | 1.09853000  | 1.84608100  |
| C | -0.87396500 | 2.61902400  | 1.50613400  |
| H | 2.20951700  | -0.13980000 | 0.00540200  |
| O | 1.07452900  | -1.69300900 | 0.35559300  |
| H | 1.21682200  | 1.51247600  | -0.95134500 |
| O | 0.63524700  | -1.48331500 | 2.83433100  |
| H | -0.74922800 | 1.71475200  | 0.51222900  |
| C | -6.15840500 | -2.94163400 | 0.82285200  |
| C | -5.69180400 | -2.73674300 | -0.46947700 |
| C | -4.76620500 | -1.71714800 | -0.75029500 |
| C | -4.75194700 | -1.10162400 | 1.61331000  |
| C | -5.71236300 | -2.10157200 | 1.84017700  |
| C | -1.97568000 | -1.31874900 | -2.66422500 |
| C | -3.32112600 | -1.15188500 | -2.98623900 |
| C | -3.66612900 | -0.69100400 | -4.26669800 |
| C | -2.69785800 | -0.57858700 | -5.25945600 |
| C | -1.38434500 | -0.94927800 | -4.96592400 |
| C | -0.98168500 | -1.31353200 | -3.66805500 |
| H | -6.10251800 | -2.21533200 | 2.84707800  |
| H | -0.63932100 | -0.95720600 | -5.75553400 |
| C | -4.59210400 | -1.58623100 | -2.26100600 |
| C | -4.94944300 | -3.04975600 | -2.70421000 |
| H | -4.06068200 | -3.67879500 | -2.57821000 |
| H | -5.25018900 | -3.10587800 | -3.75430800 |
| H | -5.65032100 | -1.15700300 | -5.01507900 |
| H | -5.38106600 | 0.56172700  | -4.76190100 |
| C | -4.24559800 | -0.96901500 | 0.30483300  |
| H | -6.87317700 | -3.73172700 | 1.03793600  |
| H | -2.96189500 | -0.25338700 | -6.26272700 |
| C | -6.04612600 | -3.50285100 | -1.72274000 |
| H | -6.05276400 | -4.58721700 | -1.56486600 |
| H | -7.04745800 | -3.23061500 | -2.08517200 |
| C | -5.15608100 | -0.43121500 | -4.35518100 |
| C | -5.62021200 | -0.58908000 | -2.88830100 |
| H | -5.54474300 | 0.37120600  | -2.36529300 |
| H | -6.65259300 | -0.94019000 | -2.79692400 |
| C | 0.41842700  | -1.78128700 | -3.42366600 |
| C | 1.52583000  | -0.93745100 | -3.69617200 |
| C | 0.63588700  | -3.11916900 | -2.99932000 |

|   |              |              |              |
|---|--------------|--------------|--------------|
| C | 1. 39548700  | 0. 39358700  | -4. 21066600 |
| C | 2. 86848500  | -1. 42328200 | -3. 46436900 |
| C | 1. 98245800  | -3. 58043200 | -2. 75054700 |
| C | 2. 49251800  | 1. 17207900  | -4. 48172200 |
| H | 0. 40535900  | 0. 78348400  | -4. 41090300 |
| C | 3. 98381500  | -0. 57034500 | -3. 73609300 |
| C | 3. 05903800  | -2. 71951600 | -2. 97936700 |
| C | 3. 80899000  | 0. 69188700  | -4. 23438700 |
| H | 2. 35496400  | 2. 16946800  | -4. 89169500 |
| H | 4. 98143400  | -0. 95314500 | -3. 53668600 |
| H | 4. 06859200  | -3. 06957000 | -2. 77893500 |
| H | 4. 66479700  | 1. 32937500  | -4. 43425100 |
| C | -4. 41994800 | -0. 19420200 | 2. 75801500  |
| C | -3. 72525900 | -0. 69207500 | 3. 88705400  |
| C | -4. 95201500 | 1. 12011200  | 2. 76905700  |
| C | -3. 15179900 | -2. 00327400 | 3. 92751800  |
| C | -3. 56593100 | 0. 14723500  | 5. 05412700  |
| C | -4. 76292200 | 1. 95587500  | 3. 93380200  |
| C | -2. 49218900 | -2. 45588100 | 5. 03959900  |
| H | -3. 21316900 | -2. 62860900 | 3. 04601600  |
| C | -2. 87900900 | -0. 36872800 | 6. 19743800  |
| C | -4. 08340100 | 1. 44512400  | 5. 04332100  |
| C | -2. 36070400 | -1. 63480300 | 6. 19530500  |
| H | -2. 04399300 | -3. 44469500 | 5. 03245000  |
| H | -2. 77442400 | 0. 27411500  | 7. 06834400  |
| H | -3. 95938600 | 2. 07263700  | 5. 92390000  |
| H | -1. 83457800 | -2. 01421300 | 7. 06692700  |
| C | -0. 17057400 | -5. 35803700 | -2. 43624900 |
| H | -0. 99440300 | -6. 05968900 | -2. 33541100 |
| C | -0. 41963100 | -4. 07388900 | -2. 84396500 |
| H | -1. 43622200 | -3. 77786400 | -3. 07465700 |
| C | 1. 15289300  | -5. 78580600 | -2. 13667200 |
| H | 1. 32733000  | -6. 80146800 | -1. 79276100 |
| C | 2. 19902500  | -4. 91874700 | -2. 29380600 |
| H | 3. 21660200  | -5. 22576700 | -2. 07197300 |
| C | -6. 20767900 | 2. 94169400  | 1. 72455300  |
| H | -6. 77835300 | 3. 32666700  | 0. 88358100  |
| C | -5. 99422700 | 3. 76908600  | 2. 86353800  |
| H | -6. 39732100 | 4. 77806200  | 2. 88050300  |
| C | -5. 29532000 | 3. 28352500  | 3. 93585900  |
| H | -5. 13799400 | 3. 89786800  | 4. 81953300  |
| C | -5. 70830500 | 1. 66568800  | 1. 68100600  |
| H | -5. 89255400 | 1. 04835400  | 0. 80898000  |
| C | -0. 55865900 | 4. 10971500  | -1. 89384800 |

|   |             |            |             |
|---|-------------|------------|-------------|
| C | -1.63255700 | 5.02119500 | -1.86185600 |
| C | -0.71598700 | 2.97064700 | -2.68979300 |
| C | -2.79728800 | 4.80804500 | -2.59512600 |
| H | -1.57203700 | 5.91708500 | -1.25025400 |
| C | -1.88367000 | 2.74632600 | -3.42495800 |
| H | 0.07270800  | 2.23225000 | -2.74931500 |
| C | -2.92769700 | 3.66588200 | -3.38711800 |
| H | -3.60226500 | 5.53675500 | -2.54601900 |
| H | -1.97174200 | 1.84491500 | -4.02378000 |
| H | -3.83373500 | 3.49595600 | -3.96266100 |
| C | 2.48231400  | 6.47676000 | -1.09911600 |
| C | 2.51497900  | 7.34243800 | -0.06012500 |
| C | 3.75309400  | 6.15408400 | -1.87822400 |
| H | 4.43075800  | 5.48439200 | -1.33419200 |
| H | 3.51624300  | 5.65937100 | -2.82492800 |
| H | 4.31540200  | 7.06199600 | -2.12291800 |
| C | 1.55273100  | 2.87387700 | 2.08462600  |
| H | 1.65019400  | 1.79216100 | 2.20288800  |
| H | 2.48042100  | 3.27561400 | 1.67529900  |
| H | 1.42029000  | 3.28097000 | 3.10039000  |
| C | -1.00471100 | 1.71648800 | 2.73923000  |
| H | -0.19671100 | 0.99330800 | 2.85979000  |
| H | -1.04685500 | 2.33530400 | 3.64550900  |
| H | -1.93344500 | 1.14849900 | 2.68700700  |
| C | 3.80538100  | 7.96258900 | 0.43323400  |
| H | 3.88595700  | 9.01080700 | 0.10842600  |
| H | 3.82805100  | 7.97743100 | 1.53063000  |
| H | 4.69818600  | 7.43606800 | 0.09214800  |
| C | 1.31088100  | 7.84266400 | 0.70723600  |
| H | 1.33055500  | 8.94026500 | 0.75619700  |
| H | 0.35081200  | 7.54977000 | 0.27790500  |
| H | 1.32945800  | 7.49123200 | 1.74857900  |
| C | -2.20504600 | 3.27226800 | 1.12716800  |
| H | -2.14945900 | 3.87999900 | 0.22723700  |
| H | -2.96537900 | 2.50646100 | 0.96146000  |
| H | -2.55337000 | 3.89793500 | 1.95988000  |

TS-1-2-7SR-3

l imaginary frequency

H = -5472.465895

G = -5472.677387

E(M06-2X-DCM) = -5473.447303

|   |            |             |            |
|---|------------|-------------|------------|
| 0 | 1.33425600 | -1.28551400 | 1.82081000 |
| 0 | 3.13859000 | -0.68588200 | 0.03013400 |

|   |             |             |             |
|---|-------------|-------------|-------------|
| P | 1.53736600  | -0.80955600 | 0.28035700  |
| O | 0.99030600  | 0.60915500  | 0.04923300  |
| N | 0.99240400  | -2.00156800 | -0.63574600 |
| S | -0.57461500 | -2.24762600 | -0.82314100 |
| C | -0.76837200 | -4.02289800 | -0.27515500 |
| F | -0.31463300 | -4.17415800 | 0.96929000  |
| F | -0.08628100 | -4.83902200 | -1.08870400 |
| F | -2.06272400 | -4.34670400 | -0.31855100 |
| C | -0.17886100 | 4.46416700  | -0.85094900 |
| C | 0.00578900  | 3.83486500  | -2.29752100 |
| H | 0.89808000  | 4.31247900  | -2.71818900 |
| H | -0.85220700 | 4.18521500  | -2.88035400 |
| C | 0.11591500  | 2.34801000  | -2.57476300 |
| C | -1.35578700 | 3.79073300  | -0.06891000 |
| H | -1.18032400 | 3.88077300  | 1.00346900  |
| H | -2.26826000 | 4.34087900  | -0.28863000 |
| N | -1.69221000 | 2.39894900  | -0.36149300 |
| C | -2.97750200 | 2.02550700  | -0.70317300 |
| N | -3.17681700 | 0.67570400  | -0.64079900 |
| C | -4.35686700 | -0.07420000 | -0.86542100 |
| C | -5.30456200 | 0.22393700  | -1.85448700 |
| C | -4.53335300 | -1.21602500 | -0.07418700 |
| C | -6.42203400 | -0.59592800 | -2.00852300 |
| C | -5.65500000 | -2.02646700 | -0.24555300 |
| H | -3.78593500 | -1.47448800 | 0.66609800  |
| C | -6.61616800 | -1.72113700 | -1.20556300 |
| H | -7.49284200 | -2.34454700 | -1.33002700 |
| C | -5.82216900 | -3.21046900 | 0.66681400  |
| C | -7.40345300 | -0.30600800 | -3.11415000 |
| F | -6.09991600 | -2.82019300 | 1.94435800  |
| F | -6.82728600 | -4.02212900 | 0.28164700  |
| F | -4.69757100 | -3.95496000 | 0.73764300  |
| F | -8.65878800 | -0.68311700 | -2.77883800 |
| F | -7.44317000 | 1.00484800  | -3.42974400 |
| F | -7.08629300 | -0.97531900 | -4.24831900 |
| S | -4.15084400 | 3.13797200  | -1.19656100 |
| C | -0.61244600 | 5.96079700  | -1.17986400 |
| H | -1.65430400 | 5.90117600  | -1.52557900 |
| H | -0.03628500 | 6.27876400  | -2.04894700 |
| H | -5.17747100 | 1.09092400  | -2.48518700 |
| C | 1.28905100  | 1.59655400  | -2.42751400 |
| H | -2.41712400 | 0.09399000  | -0.27655600 |
| O | -1.40556600 | -1.47782600 | 0.14070300  |
| H | -1.11424200 | 1.68996900  | 0.08535600  |

|   |             |             |             |
|---|-------------|-------------|-------------|
| O | -0.98345000 | -2.22102500 | -2.23186700 |
| H | 1.01314000  | 1.16281700  | -1.17976400 |
| C | 5.55166200  | -4.06262300 | 0.65781500  |
| C | 5.13952900  | -3.27739000 | 1.72740100  |
| C | 4.39679700  | -2.10298600 | 1.51757000  |
| C | 4.46084900  | -2.51269800 | -0.88961900 |
| C | 5.24041400  | -3.65374600 | -0.63678400 |
| C | 1.73307300  | -0.53862400 | 2.93306000  |
| C | 3.08906200  | -0.45608500 | 3.23903700  |
| C | 3.51350400  | 0.44441200  | 4.22848000  |
| C | 2.58121100  | 1.11382200  | 5.01567300  |
| C | 1.22295200  | 0.85806100  | 4.82018200  |
| C | 0.75744200  | 0.04364800  | 3.77113900  |
| H | 5.59811100  | -4.22652700 | -1.48708900 |
| H | 0.49267400  | 1.30090700  | 5.49007400  |
| C | 4.26501000  | -1.33845400 | 2.83224600  |
| C | 4.38518100  | -2.52618900 | 3.85209800  |
| H | 3.40414500  | -3.00605800 | 3.94559500  |
| H | 4.68764500  | -2.19139500 | 4.84853000  |
| H | 5.39654100  | 0.02989500  | 5.22554300  |
| H | 5.41816700  | 1.50743400  | 4.27292800  |
| C | 3.99401200  | -1.78293600 | 0.22145500  |
| H | 6.12479900  | -4.97129800 | 0.82284900  |
| H | 2.90007000  | 1.79051100  | 5.80450400  |
| C | 5.37960100  | -3.50611900 | 3.20177200  |
| H | 5.20631100  | -4.54633900 | 3.49968000  |
| H | 6.41676900  | -3.26790200 | 3.47675300  |
| C | 5.02660100  | 0.48380200  | 4.29617000  |
| C | 5.44762800  | -0.33994700 | 3.05626100  |
| H | 5.52795800  | 0.31453800  | 2.18064000  |
| H | 6.40756800  | -0.85004700 | 3.18191300  |
| C | -0.70153300 | -0.25709200 | 3.63729500  |
| C | -1.64883600 | 0.78987600  | 3.49217300  |
| C | -1.14573500 | -1.60261300 | 3.74353100  |
| C | -1.29361300 | 2.17847400  | 3.46006000  |
| C | -3.05603000 | 0.46961500  | 3.38597100  |
| C | -2.55019100 | -1.90663900 | 3.59245600  |
| C | -2.24678900 | 3.16245800  | 3.37774100  |
| H | -0.24849600 | 2.45715700  | 3.52202000  |
| C | -4.01338200 | 1.52510600  | 3.26534100  |
| C | -3.46438100 | -0.86620100 | 3.40930700  |
| C | -3.62820400 | 2.83786300  | 3.27286000  |
| H | -1.94340300 | 4.20615700  | 3.38673500  |
| H | -5.06273700 | 1.25630400  | 3.17456300  |

|   |              |              |              |
|---|--------------|--------------|--------------|
| H | -4. 51937600 | -1. 10278300 | 3. 29356300  |
| H | -4. 36601000 | 3. 63005600  | 3. 18839100  |
| C | 4. 27642700  | -2. 10218400 | -2. 31811300 |
| C | 3. 49733200  | -2. 89383000 | -3. 19579400 |
| C | 5. 01750100  | -1. 00036700 | -2. 81630200 |
| C | 2. 71316200  | -4. 00473000 | -2. 74744200 |
| C | 3. 46955400  | -2. 57763200 | -4. 60674700 |
| C | 4. 96029000  | -0. 68228300 | -4. 22562400 |
| C | 1. 98091700  | -4. 75783600 | -3. 62700700 |
| H | 2. 67774100  | -4. 22645600 | -1. 68810400 |
| C | 2. 69749100  | -3. 39455800 | -5. 49092300 |
| C | 4. 19633800  | -1. 48216600 | -5. 08021700 |
| C | 1. 97802800  | -4. 45806600 | -5. 01891100 |
| H | 1. 37801900  | -5. 58146500 | -3. 25696700 |
| H | 2. 69341800  | -3. 14577900 | -6. 54955600 |
| H | 4. 17083700  | -1. 24850300 | -6. 14289400 |
| H | 1. 39070600  | -5. 06893200 | -5. 69888900 |
| C | -0. 73663500 | -3. 98244900 | 4. 13282400  |
| H | -0. 04652600 | -4. 78832000 | 4. 36846400  |
| C | -0. 27183000 | -2. 69672000 | 4. 04213400  |
| H | 0. 77837900  | -2. 49898900 | 4. 22136200  |
| C | -2. 11142800 | -4. 27936500 | 3. 91814300  |
| H | -2. 45662100 | -5. 30810600 | 3. 97116900  |
| C | -2. 99244100 | -3. 26559900 | 3. 65958600  |
| H | -4. 04661500 | -3. 46973200 | 3. 49770900  |
| C | 6. 55767100  | 0. 87476800  | -2. 50457000 |
| H | 7. 18682000  | 1. 47398700  | -1. 85175300 |
| C | 6. 47666000  | 1. 19800700  | -3. 88885200 |
| H | 7. 03831800  | 2. 04226600  | -4. 27935300 |
| C | 5. 70263700  | 0. 43529200  | -4. 72138100 |
| H | 5. 64225100  | 0. 66062500  | -5. 78371500 |
| C | 5. 85757200  | -0. 18550300 | -1. 98954000 |
| H | 5. 94349000  | -0. 42162900 | -0. 93490900 |
| C | 1. 14793800  | 4. 46003600  | -0. 07182400 |
| C | 2. 17987700  | 5. 34527100  | -0. 43612600 |
| C | 1. 39587400  | 3. 59467400  | 1. 00115500  |
| C | 3. 39678700  | 5. 36680700  | 0. 24188400  |
| H | 2. 04060900  | 6. 02732400  | -1. 26789300 |
| C | 2. 61576700  | 3. 60895700  | 1. 68424900  |
| H | 0. 65099600  | 2. 87276900  | 1. 31023000  |
| C | 3. 62035300  | 4. 49843400  | 1. 31227200  |
| H | 4. 17007100  | 6. 06580000  | -0. 06656100 |
| H | 2. 77246300  | 2. 91382700  | 2. 50439100  |
| H | 4. 56805500  | 4. 51456100  | 1. 84402400  |

|   |             |             |             |
|---|-------------|-------------|-------------|
| C | -0.51735600 | 7.02172600  | -0.09319800 |
| C | 0.15259300  | 8.18449400  | -0.26220000 |
| C | -1.29737300 | 6.71174700  | 1.16839000  |
| H | -2.28277000 | 6.29982600  | 0.92066900  |
| H | -0.78265900 | 5.96216100  | 1.78456800  |
| H | -1.46687200 | 7.58802100  | 1.79489600  |
| C | -1.07136700 | 1.72345600  | -3.25141000 |
| H | -1.26329400 | 0.69815400  | -2.92418500 |
| H | -1.97901100 | 2.31580100  | -3.13420000 |
| H | -0.83969000 | 1.65727900  | -4.32677800 |
| C | 1.40578200  | 0.27513900  | -3.19648500 |
| H | 0.53992300  | -0.38129100 | -3.10508300 |
| H | 1.56417400  | 0.48621200  | -4.26248800 |
| H | 2.27255400  | -0.28251200 | -2.84231700 |
| C | 0.26053600  | 9.26054700  | 0.79956800  |
| H | 1.30766800  | 9.57559400  | 0.90462700  |
| H | -0.30211200 | 10.15864800 | 0.50625900  |
| H | -0.08442900 | 8.95564000  | 1.78777100  |
| C | 0.88901200  | 8.60188900  | -1.51863000 |
| H | 1.97036200  | 8.66785700  | -1.33018500 |
| H | 0.73919100  | 7.95021400  | -2.38087800 |
| H | 0.57047300  | 9.60955800  | -1.81882100 |
| C | 2.65371300  | 2.25843200  | -2.22732300 |
| H | 2.60725400  | 3.21164200  | -1.70661300 |
| H | 3.31288700  | 1.59698900  | -1.65941900 |
| H | 3.12268700  | 2.41240000  | -3.20860200 |

TS-1-2-7RS

l imaginary frequency

H = -5472.459963

G = -5472.673821

E(M06-2X-DCM) = -5473.441135

|   |             |             |             |
|---|-------------|-------------|-------------|
| O | -1.94453500 | 1.27887300  | 1.49966300  |
| O | -3.29286400 | -0.82300600 | 0.71373600  |
| P | -1.97874800 | 0.07904500  | 0.39180700  |
| O | -2.09836300 | 0.78675800  | -0.95225700 |
| N | -0.68054700 | -0.82498500 | 0.67702400  |
| S | -0.45796700 | -2.33340900 | 0.20894200  |
| C | -0.85399900 | -3.35204100 | 1.73033600  |
| F | -0.75796200 | -4.64725000 | 1.42718400  |
| F | 0.01000900  | -3.07394900 | 2.71688800  |
| F | -2.09273200 | -3.09122400 | 2.15982000  |
| C | 1.46084600  | 3.08841900  | -2.44742200 |
| C | 1.18075000  | 1.96857200  | -3.54633900 |



|   |             |             |             |
|---|-------------|-------------|-------------|
| H | 0.70387500  | 2.49726900  | -4.38087400 |
| H | 2.16790000  | 1.64324000  | -3.88493500 |
| C | 0.38664900  | 0.69425400  | -3.31475100 |
| C | 2.22690300  | 2.53093100  | -1.19251600 |
| H | 1.84990500  | 3.01407100  | -0.29023300 |
| H | 3.27025100  | 2.82710900  | -1.28893200 |
| N | 2.24209700  | 1.08853500  | -0.94355600 |
| C | 3.37340200  | 0.32774700  | -1.11947700 |
| N | 3.28827300  | -0.91577700 | -0.55926500 |
| C | 4.31391700  | -1.88341000 | -0.45113400 |
| C | 5.61423200  | -1.54053400 | -0.06591300 |
| C | 3.98512200  | -3.23178600 | -0.63756100 |
| C | 6.56578800  | -2.53941700 | 0.13233700  |
| C | 4.95307400  | -4.21873600 | -0.44592500 |
| H | 2.97154700  | -3.50608300 | -0.90521600 |
| C | 6.25049500  | -3.88408200 | -0.05968400 |
| H | 6.99491600  | -4.65380100 | 0.10119000  |
| C | 4.60370200  | -5.65801100 | -0.71863400 |
| C | 7.91321000  | -2.13705400 | 0.66620200  |
| F | 3.31406200  | -5.92840400 | -0.42625200 |
| F | 5.37151900  | -6.50647300 | 0.00221600  |
| F | 4.78637600  | -5.97630400 | -2.02200800 |
| F | 8.81951100  | -3.13308600 | 0.58245800  |
| F | 7.83041600  | -1.78604700 | 1.97825100  |
| F | 8.41789100  | -1.06798400 | 0.01579100  |
| S | 4.69334700  | 0.85105000  | -2.03534200 |
| C | 2.47506000  | 4.07023000  | -3.17151300 |
| H | 3.23256500  | 3.42591200  | -3.61564700 |
| H | 1.95737200  | 4.55178700  | -4.01056200 |
| H | 5.87168300  | -0.50324900 | 0.09644300  |
| C | -1.01289500 | 0.59083600  | -3.34358900 |
| H | 2.37549300  | -1.24952200 | -0.23946400 |
| O | 0.99138300  | -2.55094100 | 0.01177300  |
| H | 1.57976400  | 0.74511000  | -0.25278800 |
| O | -1.36828300 | -2.82269400 | -0.83334000 |
| H | -1.29718600 | 0.69856100  | -2.03477300 |
| C | -7.11433900 | 0.90638200  | 0.58854900  |
| C | -6.26924800 | 1.12128600  | 1.67146400  |
| C | -5.03429000 | 0.46126100  | 1.74882800  |
| C | -5.45127700 | -0.59948200 | -0.40884600 |
| C | -6.71869000 | 0.01544300  | -0.40638900 |
| C | -1.85727100 | 0.96385900  | 2.86886200  |
| C | -3.00211000 | 0.53289500  | 3.54086700  |
| C | -2.88612400 | 0.05130300  | 4.85559100  |

|   |             |             |             |
|---|-------------|-------------|-------------|
| C | -1.67210700 | 0.10378300  | 5.52835400  |
| C | -0.57568900 | 0.67280300  | 4.88714500  |
| C | -0.63309500 | 1.11229600  | 3.55225700  |
| H | -7.39758300 | -0.21344000 | -1.22169700 |
| H | 0.36464900  | 0.78014700  | 5.41870400  |
| C | -4.47719900 | 0.59676100  | 3.15876100  |
| C | -5.10680400 | 1.96796200  | 3.57700000  |
| H | -5.15555900 | 2.09157700  | 4.66306000  |
| H | -4.48456800 | 2.77713600  | 3.17701000  |
| H | -4.11434300 | -1.44872900 | 5.85199900  |
| H | -4.65774700 | 0.20806600  | 6.09277000  |
| C | -4.59371600 | -0.30102000 | 0.66924800  |
| H | -8.08333000 | 1.39558900  | 0.52987900  |
| H | -1.58126300 | -0.26581100 | 6.54644000  |
| C | -6.49199700 | 1.98480300  | 2.89406400  |
| H | -7.26693000 | 1.55877400  | 3.54614000  |
| H | -6.82305100 | 2.99752600  | 2.63643300  |
| C | -4.21135300 | -0.47568000 | 5.35725600  |
| C | -5.05095400 | -0.54420400 | 4.06688800  |
| H | -6.12662700 | -0.44046400 | 4.23739200  |
| H | -4.88246800 | -1.50532600 | 3.56757100  |
| C | 0.58120200  | 1.80982100  | 3.02172000  |
| C | 0.54336700  | 3.21627200  | 2.83510500  |
| C | 1.81264400  | 1.11397600  | 2.92759600  |
| C | -0.64738500 | 3.99597000  | 2.99949100  |
| C | 1.76318400  | 3.92664700  | 2.51920100  |
| C | 3.03098000  | 1.84555000  | 2.65936900  |
| C | -0.64407000 | 5.35549500  | 2.82425000  |
| H | -1.56685400 | 3.49614200  | 3.28155000  |
| C | 1.72008400  | 5.34427700  | 2.33057600  |
| C | 2.97066600  | 3.22534200  | 2.44676000  |
| C | 0.55177300  | 6.04278900  | 2.47310300  |
| H | -1.56344600 | 5.91892100  | 2.95926000  |
| H | 2.64660800  | 5.85679600  | 2.08331900  |
| H | 3.88898700  | 3.77067900  | 2.23932800  |
| H | 0.53368400  | 7.11980700  | 2.33222800  |
| C | -5.13847700 | -1.57455900 | -1.49742500 |
| C | -4.87978700 | -2.93442100 | -1.18274800 |
| C | -5.23249800 | -1.16535200 | -2.85354300 |
| C | -4.84298200 | -3.43767800 | 0.15682700  |
| C | -4.67956200 | -3.88759500 | -2.25089800 |
| C | -5.07722000 | -2.14266600 | -3.90813000 |
| C | -4.57742400 | -4.75538100 | 0.42117000  |
| H | -5.03647800 | -2.76157600 | 0.98027900  |

|   |             |             |             |
|---|-------------|-------------|-------------|
| C | -4.39770400 | -5.25286200 | -1.93326600 |
| C | -4.79333600 | -3.46981600 | -3.57858700 |
| C | -4.33894700 | -5.67851000 | -0.63507600 |
| H | -4.54923100 | -5.10214800 | 1.45054100  |
| H | -4.23464700 | -5.94715400 | -2.75399500 |
| H | -4.66311000 | -4.19822400 | -4.37638000 |
| H | -4.12104000 | -6.71767500 | -0.40501400 |
| C | 3.13330600  | -0.93576900 | 3.08754700  |
| H | 3.17964500  | -2.01248100 | 3.22396900  |
| C | 1.91707600  | -0.30345400 | 3.11047800  |
| H | 1.01258100  | -0.87960900 | 3.25610100  |
| C | 4.33604900  | -0.20351200 | 2.86958200  |
| H | 5.29066300  | -0.72174800 | 2.85876000  |
| C | 4.27871000  | 1.14548900  | 2.64412600  |
| H | 5.18491600  | 1.71594000  | 2.45551400  |
| C | -5.57461600 | 0.54859400  | -4.56942500 |
| H | -5.74758200 | 1.58841100  | -4.83416400 |
| C | -5.45794500 | -0.42690600 | -5.59964900 |
| H | -5.55716100 | -0.12884100 | -6.63982400 |
| C | -5.20634100 | -1.73160500 | -5.27218800 |
| H | -5.09665300 | -2.48694900 | -6.04688800 |
| C | -5.45982100 | 0.19444000  | -3.24921900 |
| H | -5.52893900 | 0.95853500  | -2.48390800 |
| C | 0.14069100  | 3.80616100  | -2.09227900 |
| C | -0.43773300 | 4.72855600  | -2.98762900 |
| C | -0.56238200 | 3.54836100  | -0.91004900 |
| C | -1.63854000 | 5.37454800  | -2.70324300 |
| H | 0.04782500  | 4.95220300  | -3.93198800 |
| C | -1.77424000 | 4.18365900  | -0.62284100 |
| H | -0.18606800 | 2.83866600  | -0.18355200 |
| C | -2.31570100 | 5.10649600  | -1.51189700 |
| H | -2.04580600 | 6.08559000  | -3.41769300 |
| H | -2.28528600 | 3.93914000  | 0.30210600  |
| H | -3.25448600 | 5.60576500  | -1.28741400 |
| C | 3.16643100  | 5.14607900  | -2.33866900 |
| C | 4.51510800  | 5.25561100  | -2.28181300 |
| C | -1.62433500 | -0.79331200 | -3.60469400 |
| H | -1.42699200 | -1.09848900 | -4.64188700 |
| H | -1.25610700 | -1.57511900 | -2.93898000 |
| H | -2.70423800 | -0.74001700 | -3.47381800 |
| C | 5.23917500  | 6.30708200  | -1.46172300 |
| H | 5.65775700  | 7.09180300  | -2.10879300 |
| H | 4.62374600  | 6.79237000  | -0.70294300 |
| H | 6.09319500  | 5.84893700  | -0.94586400 |

|   |             |             |             |
|---|-------------|-------------|-------------|
| C | 1.18475900  | -0.57942000 | -3.28524800 |
| H | 2.25769500  | -0.40347300 | -3.24213600 |
| H | 0.89359100  | -1.24528700 | -2.46679900 |
| H | 0.96239100  | -1.13585100 | -4.20851000 |
| C | 2.24744000  | 6.13977300  | -1.65515200 |
| H | 1.49008400  | 6.50559200  | -2.35804100 |
| H | 1.69167000  | 5.69579000  | -0.81994700 |
| H | 2.77801600  | 7.01272900  | -1.27298600 |
| C | -1.88390800 | 1.71099300  | -3.91572700 |
| H | -2.87986000 | 1.67148500  | -3.46929100 |
| H | -1.48035300 | 2.70608000  | -3.75182000 |
| H | -2.00436100 | 1.54847500  | -4.99584000 |
| C | 5.50818800  | 4.39173000  | -3.03114800 |
| H | 6.07852300  | 3.76229500  | -2.33606000 |
| H | 5.07191500  | 3.72954500  | -3.77843300 |
| H | 6.23654800  | 5.03613700  | -3.54344500 |

TS-1-2-7RS-1

l imaginary frequency

H = -5472.453344

G = -5472.668184

E(M06-2X-DCM) = -5473.435953

|   |             |             |             |
|---|-------------|-------------|-------------|
| O | -2.06436300 | 1.00240100  | 1.62753200  |
| O | -3.11442900 | -1.15472500 | 0.57775500  |
| P | -1.89916800 | -0.08432500 | 0.41613800  |
| O | -2.01949100 | 0.71651400  | -0.87347300 |
| N | -0.52137800 | -0.85648400 | 0.69095500  |
| S | -0.09749800 | -2.35878000 | 0.40591400  |
| C | -0.62451800 | -3.32242900 | 1.92456400  |
| F | -0.13818600 | -4.56228800 | 1.84824200  |
| F | -0.15603400 | -2.73801600 | 3.03487500  |
| F | -1.96068500 | -3.38555000 | 2.00712900  |
| C | 1.30757900  | 3.11129200  | -2.54065400 |
| C | 1.03675200  | 1.98491200  | -3.63615300 |
| H | 0.45300800  | 2.47456400  | -4.42420900 |
| H | 2.01848100  | 1.74874500  | -4.05683500 |
| C | 0.37875400  | 0.64737000  | -3.34080400 |
| C | 2.30999100  | 2.62738000  | -1.44056700 |
| H | 2.16257200  | 3.22031100  | -0.53488400 |
| H | 3.31379900  | 2.84201100  | -1.79140900 |
| N | 2.34981500  | 1.21104700  | -1.06980900 |
| C | 3.48240200  | 0.45111700  | -1.25402800 |
| N | 3.45549400  | -0.75063200 | -0.60719600 |
| C | 4.52000200  | -1.67914100 | -0.49496200 |

|   |              |              |              |
|---|--------------|--------------|--------------|
| C | 5. 81796700  | -1. 26850600 | -0. 17096800 |
| C | 4. 23962500  | -3. 04455000 | -0. 61300400 |
| C | 6. 82009400  | -2. 21700200 | 0. 02125600  |
| C | 5. 25523300  | -3. 98329300 | -0. 41999900 |
| H | 3. 22803500  | -3. 36970300 | -0. 82420100 |
| C | 6. 55215900  | -3. 58030500 | -0. 10630900 |
| H | 7. 33233600  | -4. 31315800 | 0. 05822300  |
| C | 4. 95266100  | -5. 44646200 | -0. 61064400 |
| C | 8. 20626600  | -1. 74177100 | 0. 36595500  |
| F | 3. 69378000  | -5. 75437400 | -0. 23453700 |
| F | 5. 79428300  | -6. 23025700 | 0. 10062300  |
| F | 5. 07654400  | -5. 81447800 | -1. 90782700 |
| F | 8. 93795000  | -2. 70704400 | 0. 96450700  |
| F | 8. 16874100  | -0. 68131300 | 1. 21015400  |
| F | 8. 89256800  | -1. 34410700 | -0. 72731800 |
| S | 4. 74693100  | 0. 90952500  | -2. 28216800 |
| C | 2. 05223000  | 4. 27606400  | -3. 34949200 |
| H | 2. 57396600  | 3. 78944000  | -4. 18072000 |
| H | 1. 29713800  | 4. 91536500  | -3. 81110500 |
| H | 6. 03499600  | -0. 21607900 | -0. 05347700 |
| C | -1. 00564600 | 0. 41211100  | -3. 29101700 |
| H | 2. 58339000  | -1. 07267300 | -0. 17888900 |
| O | 1. 37816000  | -2. 43045900 | 0. 46518200  |
| H | 1. 73403800  | 0. 91651000  | -0. 31653400 |
| O | -0. 77192500 | -3. 01522900 | -0. 72046800 |
| H | -1. 25286100 | 0. 60233700  | -1. 98790500 |
| C | -7. 14285100 | -0. 02694900 | 0. 97215000  |
| C | -6. 26323100 | 0. 08124900  | 2. 04229700  |
| C | -4. 93685300 | -0. 36203100 | 1. 92565200  |
| C | -5. 34589400 | -0. 98101300 | -0. 39982300 |
| C | -6. 68652800 | -0. 59001200 | -0. 21532900 |
| C | -1. 83389000 | 0. 56694200  | 2. 94761900  |
| C | -2. 80584400 | -0. 19687700 | 3. 59314300  |
| C | -2. 49335900 | -0. 82574200 | 4. 80996200  |
| C | -1. 28142800 | -0. 58261900 | 5. 44312200  |
| C | -0. 39174200 | 0. 31721700  | 4. 86155100  |
| C | -0. 63261700 | 0. 90210400  | 3. 60589300  |
| H | -7. 37546500 | -0. 73063200 | -1. 04204100 |
| H | 0. 53194400  | 0. 56981000  | 5. 37304200  |
| C | -4. 28970100 | -0. 38908700 | 3. 30414100  |
| C | -5. 11696500 | 0. 73164600  | 4. 02354400  |
| H | -5. 08924200 | 0. 63640900  | 5. 11292300  |
| H | -4. 68617300 | 1. 70557100  | 3. 76321500  |
| H | -3. 27771600 | -2. 71449000 | 5. 55967100  |

|   |              |              |              |
|---|--------------|--------------|--------------|
| H | -4. 15154800 | -1. 29624700 | 6. 12732300  |
| C | -4. 46729100 | -0. 80610900 | 0. 68931300  |
| H | -8. 17654400 | 0. 29668200  | 1. 06334300  |
| H | -1. 03792600 | -1. 06140100 | 6. 38801000  |
| C | -6. 53464700 | 0. 61433700  | 3. 43057000  |
| H | -7. 15580300 | -0. 08415200 | 4. 00847200  |
| H | -7. 06932300 | 1. 57104900  | 3. 41616600  |
| C | -3. 62780700 | -1. 72030500 | 5. 25949200  |
| C | -4. 53611100 | -1. 76246100 | 4. 01248000  |
| H | -5. 59200100 | -1. 93024000 | 4. 24527400  |
| H | -4. 20501200 | -2. 56440700 | 3. 34377000  |
| C | 0. 35736800  | 1. 91413500  | 3. 12049400  |
| C | -0. 00034200 | 3. 28721400  | 3. 12483900  |
| C | 1. 69555900  | 1. 53006200  | 2. 85540200  |
| C | -1. 30191200 | 3. 75354300  | 3. 50226500  |
| C | 0. 99170200  | 4. 28492700  | 2. 79155500  |
| C | 2. 68931300  | 2. 54397500  | 2. 57534300  |
| C | -1. 60993400 | 5. 08974400  | 3. 50994100  |
| H | -2. 05078300 | 3. 02964800  | 3. 80276800  |
| C | 0. 62252100  | 5. 66687000  | 2. 79031900  |
| C | 2. 30505900  | 3. 88713200  | 2. 52348200  |
| C | -0. 64131600 | 6. 06311800  | 3. 13519000  |
| H | -2. 60371000 | 5. 41238500  | 3. 80903500  |
| H | 1. 38019000  | 6. 40005100  | 2. 52385400  |
| H | 3. 05467700  | 4. 64489000  | 2. 30450700  |
| H | -0. 90599100 | 7. 11676300  | 3. 13817100  |
| C | -4. 99586400 | -1. 61369400 | -1. 70899900 |
| C | -4. 58007300 | -2. 96952800 | -1. 76129600 |
| C | -5. 24389100 | -0. 89888200 | -2. 91118800 |
| C | -4. 35380900 | -3. 76625300 | -0. 59364600 |
| C | -4. 40640900 | -3. 61196700 | -3. 04558900 |
| C | -5. 10468200 | -1. 56955000 | -4. 18460000 |
| C | -3. 94544900 | -5. 07038000 | -0. 68508500 |
| H | -4. 50649600 | -3. 32682000 | 0. 38370900  |
| C | -3. 97756800 | -4. 97532000 | -3. 09722200 |
| C | -4. 68640100 | -2. 90227500 | -4. 21607500 |
| C | -3. 74531100 | -5. 68615600 | -1. 95223700 |
| H | -3. 76818000 | -5. 64249500 | 0. 22129100  |
| H | -3. 84296500 | -5. 43426800 | -4. 07378000 |
| H | -4. 57781900 | -3. 40149200 | -5. 17691400 |
| H | -3. 41457800 | -6. 71970500 | -2. 00320000 |
| C | 3. 45066700  | -0. 16355700 | 2. 71474000  |
| H | 3. 75161900  | -1. 20663400 | 2. 74463900  |
| C | 2. 13028200  | 0. 16408200  | 2. 88306300  |

|   |             |             |             |
|---|-------------|-------------|-------------|
| H | 1.39769600  | -0.61797600 | 3.03658100  |
| C | 4.43191200  | 0.84222600  | 2.47927400  |
| H | 5.47336100  | 0.55835200  | 2.35622700  |
| C | 4.05403500  | 2.15461200  | 2.39052000  |
| H | 4.78813100  | 2.93160500  | 2.19196500  |
| C | -5.88748600 | 1.13487000  | -4.11358100 |
| H | -6.17079300 | 2.18393100  | -4.09691300 |
| C | -5.78184700 | 0.45693200  | -5.36103100 |
| H | -6.00078500 | 0.98691900  | -6.28399400 |
| C | -5.39171400 | -0.85464300 | -5.38990500 |
| H | -5.29117800 | -1.38299900 | -6.33518300 |
| C | -5.62329700 | 0.48407200  | -2.93561700 |
| H | -5.68785600 | 1.02621000  | -1.99950400 |
| C | -0.02887700 | 3.64051800  | -1.98217400 |
| C | -0.90255200 | 4.36828500  | -2.81581600 |
| C | -0.43452600 | 3.44961100  | -0.65799700 |
| C | -2.10095400 | 4.89777700  | -2.34603000 |
| H | -0.64719000 | 4.53561700  | -3.85875600 |
| C | -1.63910600 | 3.97444400  | -0.17822200 |
| H | 0.17972800  | 2.88621100  | 0.03533600  |
| C | -2.47357300 | 4.70784100  | -1.01431300 |
| H | -2.74076300 | 5.45925000  | -3.02220800 |
| H | -1.91697500 | 3.79563000  | 0.85368600  |
| H | -3.40575800 | 5.12063900  | -0.63821400 |
| C | 3.09989600  | 5.15012100  | -2.64362700 |
| C | 2.80564800  | 6.19046300  | -1.83333500 |
| C | -1.49126000 | -1.03769100 | -3.42319300 |
| H | -1.33308900 | -1.39356700 | -4.45086100 |
| H | -1.00516000 | -1.73536500 | -2.74007500 |
| H | -2.56073800 | -1.07805500 | -3.22043400 |
| C | 3.84600700  | 7.05350700  | -1.14863900 |
| H | 3.56791900  | 7.21026000  | -0.09719800 |
| H | 4.85590300  | 6.64184400  | -1.16249500 |
| H | 3.88481300  | 8.05297200  | -1.60593700 |
| C | 1.29092600  | -0.54608100 | -3.31925200 |
| H | 2.34485300  | -0.27708600 | -3.34020100 |
| H | 1.09938100  | -1.21009000 | -2.47075800 |
| H | 1.06869100  | -1.14827400 | -4.21372600 |
| C | 4.51638000  | 4.80685000  | -3.06797400 |
| H | 4.74187300  | 3.74175200  | -2.93912600 |
| H | 4.63570600  | 5.01680800  | -4.14166400 |
| H | 5.28600800  | 5.37463800  | -2.54368400 |
| C | -2.00706900 | 1.39314200  | -3.90718400 |
| H | -2.95938800 | 1.34429500  | -3.37548400 |

|   |             |            |             |
|---|-------------|------------|-------------|
| H | -1.67232500 | 2.42603600 | -3.89164600 |
| H | -2.19678800 | 1.09312100 | -4.94654000 |
| C | 1.40420900  | 6.65936700 | -1.51497800 |
| H | 1.36564000  | 7.75698300 | -1.54581200 |
| H | 0.64682600  | 6.27749100 | -2.19843600 |
| H | 1.10070400  | 6.36591200 | -0.50021500 |

TS-1-2-7RS-2

1 imaginary frequency

H = -5472.458118

G = -5472.671731

E(M06-2X-DCM) = -5473.439095

|   |             |             |             |
|---|-------------|-------------|-------------|
| O | -1.83317400 | 1.00034400  | 1.72934700  |
| O | -3.27911500 | -0.98007000 | 0.82539000  |
| P | -1.82159000 | -0.26777200 | 0.70184200  |
| O | -1.60908500 | 0.36268400  | -0.66946500 |
| N | -0.83755300 | -1.36711000 | 1.31386200  |
| S | 0.16638700  | -2.36837600 | 0.63042300  |
| C | -0.87989100 | -3.76772300 | -0.03306400 |
| F | -0.09434500 | -4.64909000 | -0.65750300 |
| F | -1.52403900 | -4.37658400 | 0.96144600  |
| F | -1.77587700 | -3.28689600 | -0.90866900 |
| C | 1.18698000  | 3.18644200  | -2.59513900 |
| C | 0.95737300  | 2.04692800  | -3.67926000 |
| H | 0.24846600  | 2.46393700  | -4.40422500 |
| H | 1.91416800  | 1.93417400  | -4.19744300 |
| C | 0.50214100  | 0.63006000  | -3.35610600 |
| C | 2.21622400  | 2.76269400  | -1.49800000 |
| H | 2.04516100  | 3.35605900  | -0.59453100 |
| H | 3.21144100  | 3.02211800  | -1.85389700 |
| N | 2.30955500  | 1.35266400  | -1.13438500 |
| C | 3.49204900  | 0.64683300  | -1.18960800 |
| N | 3.38547000  | -0.59859500 | -0.63663200 |
| C | 4.37877300  | -1.58940000 | -0.48375500 |
| C | 5.68699800  | -1.30049000 | -0.08294200 |
| C | 3.99155700  | -2.92594600 | -0.65354800 |
| C | 6.58528100  | -2.34284200 | 0.14657200  |
| C | 4.90451300  | -3.95418300 | -0.42989200 |
| H | 2.97351300  | -3.15773000 | -0.94358200 |
| C | 6.21037100  | -3.67423200 | -0.02648500 |
| H | 6.91522600  | -4.47521600 | 0.15985400  |
| C | 4.49603800  | -5.38092800 | -0.68430200 |
| C | 7.94327800  | -2.00192600 | 0.69683200  |
| F | 3.16541400  | -5.56018300 | -0.55218600 |



|   |             |             |             |
|---|-------------|-------------|-------------|
| F | 5.11113800  | -6.23572500 | 0.16366500  |
| F | 4.82422400  | -5.77447400 | -1.93895100 |
| F | 8.81817700  | -3.02242300 | 0.57616900  |
| F | 7.87051100  | -1.70007200 | 2.02169700  |
| F | 8.48265800  | -0.92573000 | 0.08779100  |
| S | 4.88415100  | 1.22213400  | -1.95129300 |
| C | 1.90045300  | 4.35555300  | -3.39780900 |
| H | 2.68381800  | 3.87861400  | -3.98759000 |
| H | 1.18824700  | 4.76783000  | -4.12241200 |
| H | 5.99330000  | -0.27472000 | 0.06363200  |
| C | -0.82714300 | 0.23183800  | -3.16797200 |
| H | 2.43947100  | -0.94883800 | -0.46415400 |
| O | 1.05059100  | -2.98896900 | 1.61371700  |
| H | 1.60506500  | 0.99012400  | -0.50081200 |
| O | 0.79595100  | -1.80978300 | -0.60304200 |
| H | -0.97414700 | 0.29461200  | -1.79013100 |
| C | -7.02639500 | 0.91096400  | 0.89167400  |
| C | -6.16160000 | 1.01502700  | 1.97412200  |
| C | -4.93955200 | 0.32191700  | 1.98991300  |
| C | -5.41310800 | -0.53947100 | -0.24771100 |
| C | -6.66398500 | 0.10174400  | -0.18078300 |
| C | -1.75346900 | 0.74212100  | 3.11141700  |
| C | -2.88887000 | 0.28931100  | 3.77673100  |
| C | -2.76440100 | -0.20825800 | 5.08336200  |
| C | -1.55282900 | -0.12344100 | 5.75916000  |
| C | -0.47277000 | 0.49305900  | 5.12950500  |
| C | -0.53731100 | 0.93276600  | 3.79571100  |
| H | -7.35696900 | -0.04221200 | -1.00354200 |
| H | 0.46085000  | 0.62781800  | 5.66696300  |
| C | -4.36423900 | 0.35962100  | 3.40406500  |
| C | -4.97159100 | 1.71168700  | 3.91407300  |
| H | -4.99908400 | 1.77017400  | 5.00596500  |
| H | -4.34491200 | 2.53550700  | 3.55266100  |
| H | -3.95587000 | -1.78098100 | 6.00814900  |
| H | -4.54123200 | -0.15286400 | 6.32860200  |
| C | -4.53247200 | -0.36312900 | 0.84296700  |
| H | -7.98417300 | 1.42502800  | 0.89155200  |
| H | -1.45043500 | -0.50443600 | 6.77194000  |
| C | -6.36358000 | 1.78737900  | 3.25799800  |
| H | -7.13170300 | 1.31695700  | 3.88734000  |
| H | -6.69352700 | 2.81728500  | 3.07912900  |
| C | -4.07829000 | -0.78808000 | 5.56076800  |
| C | -4.92360900 | -0.82025200 | 4.26824900  |
| H | -5.99922700 | -0.73286100 | 4.44932100  |

|   |             |             |             |
|---|-------------|-------------|-------------|
| H | -4.74950200 | -1.76088200 | 3.73330300  |
| C | 0.64270900  | 1.66491800  | 3.23550800  |
| C | 0.54413800  | 3.06399700  | 3.01720700  |
| C | 1.89294400  | 1.01132300  | 3.09735900  |
| C | -0.65846400 | 3.80962200  | 3.24436800  |
| C | 1.71374900  | 3.80574900  | 2.59931700  |
| C | 3.06541200  | 1.77806200  | 2.73503100  |
| C | -0.71512400 | 5.16300100  | 3.03279400  |
| H | -1.53650800 | 3.28839200  | 3.60885000  |
| C | 1.60630600  | 5.21402400  | 2.36927900  |
| C | 2.93900000  | 3.14469600  | 2.47189700  |
| C | 0.42705400  | 5.87797000  | 2.57427200  |
| H | -1.64096300 | 5.70009900  | 3.22113100  |
| H | 2.49501200  | 5.74905800  | 2.04291600  |
| H | 3.82190900  | 3.71358500  | 2.18770300  |
| H | 0.36119400  | 6.94898000  | 2.40441000  |
| C | -5.13626100 | -1.41770300 | -1.42617900 |
| C | -4.92221200 | -2.80886800 | -1.24067500 |
| C | -5.22400100 | -0.88326300 | -2.73996100 |
| C | -4.93626400 | -3.43844100 | 0.04551000  |
| C | -4.72211300 | -3.66118500 | -2.39120600 |
| C | -5.06756300 | -1.75988700 | -3.88004900 |
| C | -4.71479700 | -4.78279700 | 0.18811100  |
| H | -5.13599900 | -2.83773300 | 0.92424600  |
| C | -4.47928000 | -5.05757100 | -2.19901300 |
| C | -4.80045000 | -3.11571800 | -3.67464800 |
| C | -4.46776900 | -5.60655000 | -0.94623000 |
| H | -4.72945500 | -5.22875000 | 1.17867000  |
| H | -4.31452700 | -5.67557600 | -3.07839800 |
| H | -4.66900600 | -3.76692500 | -4.53644800 |
| H | -4.28499500 | -6.66903700 | -0.81186100 |
| C | 3.29895800  | -0.98088700 | 3.24292500  |
| H | 3.38979000  | -2.05154400 | 3.39777000  |
| C | 2.06197200  | -0.39395000 | 3.31671500  |
| H | 1.19174900  | -1.00478000 | 3.52173100  |
| C | 4.45850700  | -0.21127600 | 2.94106500  |
| H | 5.43062700  | -0.69348500 | 2.89516300  |
| C | 4.33698000  | 1.12635700  | 2.67541200  |
| H | 5.20823800  | 1.72386800  | 2.41819500  |
| C | -5.59643300 | 0.97405200  | -4.29348900 |
| H | -5.78607600 | 2.03078200  | -4.46181500 |
| C | -5.46534300 | 0.09910800  | -5.40832600 |
| H | -5.57143400 | 0.48887100  | -6.41701500 |
| C | -5.19492500 | -1.22639400 | -5.20118400 |

|   |             |             |             |
|---|-------------|-------------|-------------|
| H | -5.07939400 | -1.90715400 | -6.04135700 |
| C | -5.46802500 | 0.50403200  | -3.01169700 |
| H | -5.54344400 | 1.19669800  | -2.18197700 |
| C | -0.16920400 | 3.66388400  | -2.03936600 |
| C | -1.04690600 | 4.40633000  | -2.85518600 |
| C | -0.60203600 | 3.37381600  | -0.74151000 |
| C | -2.28166200 | 4.85147600  | -2.39099600 |
| H | -0.77246700 | 4.64196200  | -3.87897100 |
| C | -1.84628600 | 3.80711600  | -0.27199600 |
| H | 0.01889000  | 2.79885300  | -0.06398400 |
| C | -2.68878500 | 4.55408600  | -1.08888900 |
| H | -2.92596100 | 5.42808700  | -3.05000900 |
| H | -2.14335500 | 3.54673500  | 0.73711700  |
| H | -3.65270300 | 4.89613400  | -0.72154600 |
| C | 2.49914000  | 5.50432100  | -2.59504200 |
| C | 3.83080200  | 5.74329800  | -2.55368900 |
| C | -1.17833900 | -1.25074000 | -3.35605500 |
| H | -1.12512500 | -1.51571400 | -4.42140300 |
| H | -0.52616900 | -1.92394600 | -2.80081800 |
| H | -2.20218200 | -1.43052600 | -3.02246800 |
| C | 4.45496800  | 6.86475200  | -1.74631000 |
| H | 4.84037700  | 7.65564300  | -2.40623300 |
| H | 3.78301500  | 7.32792300  | -1.02266100 |
| H | 5.32128700  | 6.48194300  | -1.19057200 |
| C | 1.55581200  | -0.42824300 | -3.51819300 |
| H | 2.56829100  | -0.02540800 | -3.51149700 |
| H | 1.46865000  | -1.22032300 | -2.77255500 |
| H | 1.38692700  | -0.90793000 | -4.49622000 |
| C | 1.49201100  | 6.40168200  | -1.89923000 |
| H | 0.63063500  | 6.58652700  | -2.55080900 |
| H | 1.08722200  | 5.94911300  | -0.98480900 |
| H | 1.90829200  | 7.37436500  | -1.63189100 |
| C | -1.98392700 | 1.14426600  | -3.57360300 |
| H | -2.86870300 | 0.91622400  | -2.97917300 |
| H | -1.76824600 | 2.20206700  | -3.45245300 |
| H | -2.24160900 | 0.95062000  | -4.62406800 |
| C | 4.89535500  | 4.95485900  | -3.28837800 |
| H | 5.47970400  | 4.34125000  | -2.59018000 |
| H | 4.51922000  | 4.28469900  | -4.06240400 |
| H | 5.60076700  | 5.64772700  | -3.76722500 |

TS-1-2-7RR

l imaginary frequency

H = -5472.458301

G = -5472.670896

E(M06-2X-DCM) = -5473.446958

|   |             |             |             |
|---|-------------|-------------|-------------|
| O | -1.85913600 | 0.45311100  | 1.87264400  |
| O | -3.13921800 | -1.30495800 | 0.40048200  |
| P | -1.85809300 | -0.30812700 | 0.43141700  |
| O | -1.97572400 | 0.81199500  | -0.60531300 |
| N | -0.51570700 | -1.18732000 | 0.35681900  |
| S | -0.23761300 | -2.62484700 | -0.27061800 |
| C | -0.49928500 | -3.83022000 | 1.13727400  |
| F | -0.24448800 | -5.06657200 | 0.70772200  |
| F | 0.31155400  | -3.55169100 | 2.16404000  |
| F | -1.76864800 | -3.76777700 | 1.56220500  |
| C | 0.93049200  | 3.23435600  | -1.76290700 |
| C | 0.87464200  | 2.33280800  | -3.06237000 |
| H | 0.42932800  | 2.95371100  | -3.84914300 |
| H | 1.91496400  | 2.15119100  | -3.33828600 |
| C | 0.17319900  | 0.99245800  | -3.12413700 |
| C | 1.30965600  | 2.37159900  | -0.49419500 |
| H | 0.41515600  | 2.24889800  | 0.11621300  |
| H | 2.05106000  | 2.90430600  | 0.10212500  |
| N | 1.79556800  | 1.00634800  | -0.70319600 |
| C | 3.10737100  | 0.67677100  | -0.93221800 |
| N | 3.32925700  | -0.67476700 | -0.83031600 |
| C | 4.52202100  | -1.41494300 | -0.93273000 |
| C | 5.78929500  | -0.90596000 | -0.62418700 |
| C | 4.39980800  | -2.76780700 | -1.29393400 |
| C | 6.90323900  | -1.74545600 | -0.67413900 |
| C | 5.52540000  | -3.58571700 | -1.34774700 |
| H | 3.42162800  | -3.17571300 | -1.52446100 |
| C | 6.79142300  | -3.08460800 | -1.03919400 |
| H | 7.66552100  | -3.72194900 | -1.08418400 |
| C | 5.36500800  | -5.04495900 | -1.68287400 |
| C | 8.22715200  | -1.17930000 | -0.23591500 |
| F | 5.15202700  | -5.79065300 | -0.57283400 |
| F | 6.46833600  | -5.54515500 | -2.28325700 |
| F | 4.31872800  | -5.26313900 | -2.50849700 |
| F | 9.25849800  | -2.00351700 | -0.51674100 |
| F | 8.24366000  | -0.96796200 | 1.10767400  |
| F | 8.48664900  | 0.01123500  | -0.81446800 |
| S | 4.24771800  | 1.82571300  | -1.38337600 |
| H | 5.89942400  | 0.13082900  | -0.34221300 |
| C | -1.21529200 | 0.80595500  | -3.15839700 |
| H | 2.51179400  | -1.26577300 | -0.66736700 |
| O | 1.21009000  | -2.71465600 | -0.55670600 |

|   |             |             |             |
|---|-------------|-------------|-------------|
| H | 1.21231700  | 0.28639400  | -0.27851300 |
| O | -1.17450000 | -3.06284600 | -1.30995800 |
| H | -1.38508600 | 0.77656000  | -1.80794300 |
| C | -7.02970300 | -0.04896000 | 1.39431000  |
| C | -6.08043800 | -0.28284200 | 2.38111300  |
| C | -4.80551800 | -0.76639400 | 2.04818100  |
| C | -5.40831400 | -0.73274100 | -0.31645300 |
| C | -6.69611900 | -0.31225200 | 0.07021900  |
| C | -1.58643000 | -0.30429500 | 3.03476600  |
| C | -2.56978800 | -1.16150200 | 3.52908700  |
| C | -2.23627100 | -2.09461800 | 4.52377900  |
| C | -0.98273000 | -2.07213000 | 5.12118600  |
| C | -0.07790700 | -1.08634300 | 4.73785900  |
| C | -0.34083600 | -0.18865700 | 3.68576400  |
| H | -7.44287600 | -0.18507400 | -0.70689800 |
| H | 0.87755000  | -1.00630900 | 5.24623000  |
| C | -4.07827300 | -1.18908800 | 3.31687500  |
| C | -4.76662100 | -0.24542900 | 4.36335600  |
| H | -4.67932500 | -0.62424700 | 5.38570000  |
| H | -4.27491300 | 0.73369300  | 4.32836500  |
| H | -3.10098200 | -4.07294100 | 4.80670100  |
| H | -3.83683800 | -2.81786100 | 5.79679600  |
| C | -4.45290200 | -0.90640600 | 0.70578200  |
| H | -8.02414100 | 0.30863600  | 1.64853100  |
| H | -0.72007800 | -2.78462000 | 5.89884300  |
| C | -6.22216700 | -0.11387000 | 3.87619000  |
| H | -6.86261400 | -0.89798800 | 4.30347900  |
| H | -6.67642100 | 0.84547500  | 4.14915100  |
| C | -3.39996900 | -3.01855500 | 4.80892400  |
| C | -4.38731000 | -2.68107400 | 3.67141400  |
| H | -5.43574000 | -2.83701500 | 3.94298200  |
| H | -4.17034400 | -3.30244300 | 2.79577100  |
| C | 0.68059400  | 0.87935600  | 3.44199200  |
| C | 0.37441100  | 2.22281500  | 3.78584500  |
| C | 2.01005300  | 0.51873400  | 3.10442200  |
| C | -0.91964700 | 2.64292100  | 4.23416000  |
| C | 1.41980900  | 3.22235900  | 3.75487900  |
| C | 3.04844500  | 1.52515500  | 3.10551400  |
| C | -1.16672700 | 3.94013900  | 4.60260700  |
| H | -1.71639000 | 1.91135200  | 4.29900400  |
| C | 1.11652300  | 4.56873600  | 4.13254600  |
| C | 2.72180200  | 2.84887800  | 3.40930900  |
| C | -0.13871000 | 4.92296600  | 4.54741400  |
| H | -2.15826400 | 4.22260600  | 4.94638900  |

|   |              |              |              |
|---|--------------|--------------|--------------|
| H | 1. 91770600  | 5. 30327700  | 4. 09782000  |
| H | 3. 50819500  | 3. 60084000  | 3. 41284100  |
| H | -0. 35270400 | 5. 94616600  | 4. 84393800  |
| C | -5. 20987900 | -1. 02667200 | -1. 76987700 |
| C | -4. 96379000 | -2. 35508300 | -2. 20366300 |
| C | -5. 45904200 | -0. 00163400 | -2. 72064300 |
| C | -4. 75158600 | -3. 44721700 | -1. 30290500 |
| C | -4. 96513200 | -2. 65297000 | -3. 61932800 |
| C | -5. 48951800 | -0. 32423400 | -4. 12970700 |
| C | -4. 52054600 | -4. 71725200 | -1. 76089100 |
| H | -4. 77280400 | -3. 26363300 | -0. 23598900 |
| C | -4. 71504600 | -3. 99170500 | -4. 05572700 |
| C | -5. 23875400 | -1. 63667900 | -4. 53855200 |
| C | -4. 49316000 | -4. 99737600 | -3. 15582400 |
| H | -4. 35306300 | -5. 52277700 | -1. 05150600 |
| H | -4. 71026800 | -4. 19072200 | -5. 12472500 |
| H | -5. 26159900 | -1. 87498100 | -5. 60009500 |
| H | -4. 30142700 | -6. 01034600 | -3. 49832400 |
| C | 3. 70497700  | -1. 15438800 | 2. 55570100  |
| H | 3. 96634700  | -2. 18303400 | 2. 32375800  |
| C | 2. 39470200  | -0. 82518300 | 2. 78834100  |
| H | 1. 63096700  | -1. 58991100 | 2. 73179600  |
| C | 4. 72871000  | -0. 16447900 | 2. 59124500  |
| H | 5. 75939800  | -0. 44607300 | 2. 39630500  |
| C | 4. 40000500  | 1. 14057000  | 2. 83797000  |
| H | 5. 16428300  | 1. 91344500  | 2. 84454000  |
| C | -5. 95854100 | 2. 32540100  | -3. 29576300 |
| H | -6. 12409100 | 3. 35346200  | -2. 98492800 |
| C | -6. 01539000 | 1. 99345700  | -4. 67919100 |
| H | -6. 23845000 | 2. 76529100  | -5. 41066500 |
| C | -5. 77764000 | 0. 70619600  | -5. 07949100 |
| H | -5. 80608900 | 0. 43859400  | -6. 13324500 |
| C | -5. 68532300 | 1. 36645200  | -2. 35415200 |
| H | -5. 62634400 | 1. 64537300  | -1. 30851200 |
| C | 1. 94647000  | 4. 37554100  | -2. 00972700 |
| C | 2. 41002300  | 5. 14807200  | -0. 93044300 |
| C | 2. 37092500  | 4. 75842700  | -3. 29113200 |
| C | 3. 26974100  | 6. 22839200  | -1. 11893900 |
| H | 2. 09853000  | 4. 91448700  | 0. 08130100  |
| C | 3. 23226400  | 5. 84045300  | -3. 48679700 |
| H | 2. 05152700  | 4. 20984400  | -4. 16989000 |
| C | 3. 69009900  | 6. 58290700  | -2. 40145400 |
| H | 3. 61351400  | 6. 79278800  | -0. 25575900 |
| H | 3. 54644900  | 6. 09452400  | -4. 49591200 |

|   |             |             |             |
|---|-------------|-------------|-------------|
| H | 4.36475400  | 7.42171000  | -2.55015200 |
| C | -0.49091000 | 3.90340700  | -1.56120500 |
| H | -0.73769800 | 4.36738300  | -2.51853000 |
| H | -1.20872300 | 3.09302300  | -1.40555700 |
| C | -0.71209800 | 4.91699500  | -0.44882000 |
| C | -0.70517200 | 6.25245000  | -0.65918800 |
| C | -1.76204700 | -0.56763800 | -3.55600200 |
| H | -1.30032400 | -1.40444400 | -3.03102800 |
| H | -2.83117200 | -0.60625200 | -3.34910000 |
| H | -1.62910900 | -0.72461400 | -4.63554800 |
| C | -0.92828900 | 7.26630800  | 0.44372200  |
| H | -0.12709500 | 8.01803100  | 0.42565600  |
| H | -1.86770500 | 7.81706700  | 0.28788700  |
| H | -0.94863200 | 6.83668300  | 1.44618500  |
| C | 1.05650100  | -0.20346900 | -3.35718600 |
| H | 2.11435400  | 0.03105400  | -3.25728600 |
| H | 0.81799400  | -1.05073100 | -2.70874700 |
| H | 0.87212100  | -0.55779500 | -4.38308300 |
| C | -1.02699100 | 4.31480000  | 0.90874500  |
| H | -1.52699100 | 3.34687400  | 0.79821200  |
| H | -0.12711300 | 4.13918200  | 1.51128100  |
| H | -1.68640400 | 4.94619900  | 1.50794400  |
| C | -2.17483500 | 1.92812100  | -3.57261600 |
| H | -3.01658700 | 2.01077000  | -2.88122900 |
| H | -1.70132800 | 2.90427700  | -3.65244000 |
| H | -2.59274900 | 1.67128300  | -4.55340700 |
| C | -0.45832600 | 6.92825500  | -1.98918500 |
| H | -0.45294500 | 6.25309000  | -2.84585400 |
| H | -1.22423000 | 7.69585900  | -2.16903800 |
| H | 0.51100600  | 7.44450200  | -1.98258400 |

TS-1-2-7RR-1

l imaginary frequency

H = -5472.454084

G = -5472.666116

E(M06-2X-DCM) = -5473.441760

|   |             |             |             |
|---|-------------|-------------|-------------|
| O | -1.88691400 | 0.41838000  | 1.88037500  |
| O | -3.14713200 | -1.24696800 | 0.29048800  |
| P | -1.84782800 | -0.27943000 | 0.40807600  |
| O | -1.90267100 | 0.88580500  | -0.58578700 |
| N | -0.52076500 | -1.17824600 | 0.33224700  |
| S | -0.24173300 | -2.60371800 | -0.31905600 |
| C | -0.50980900 | -3.83748300 | 1.06190700  |
| F | -0.22521400 | -5.06135800 | 0.61565000  |

|   |             |             |             |
|---|-------------|-------------|-------------|
| F | 0.27451700  | -3.56444700 | 2.11039900  |
| F | -1.78905800 | -3.80493200 | 1.46085700  |
| C | 1.08870000  | 3.34407300  | -1.87224600 |
| C | 0.98499500  | 2.38537700  | -3.12903300 |
| H | 0.54554900  | 2.98121800  | -3.93830600 |
| H | 2.01573200  | 2.16384500  | -3.41102800 |
| C | 0.24965000  | 1.06067500  | -3.13153100 |
| C | 1.39512100  | 2.51351600  | -0.56317800 |
| H | 0.47816500  | 2.45123000  | 0.02365400  |
| H | 2.13862100  | 3.03328700  | 0.04012800  |
| N | 1.83285800  | 1.12217900  | -0.71715900 |
| C | 3.13512900  | 0.73705200  | -0.92093000 |
| N | 3.31019300  | -0.61896900 | -0.79300200 |
| C | 4.48658000  | -1.38971600 | -0.88335400 |
| C | 5.75538000  | -0.91783300 | -0.52642900 |
| C | 4.34532400  | -2.72915200 | -1.28333600 |
| C | 6.85292300  | -1.77887900 | -0.56941400 |
| C | 5.45473600  | -3.57019500 | -1.32749700 |
| H | 3.36587800  | -3.10973900 | -1.55038200 |
| C | 6.72225500  | -3.10531800 | -0.97269100 |
| H | 7.58337400  | -3.76041700 | -1.01138200 |
| C | 5.27145200  | -5.01627000 | -1.70527500 |
| C | 8.17783800  | -1.24748400 | -0.09253800 |
| F | 4.99684900  | -5.78316400 | -0.62364800 |
| F | 6.38443300  | -5.53010600 | -2.27575500 |
| F | 4.25292700  | -5.18692000 | -2.57559800 |
| F | 9.19158800  | -2.10826100 | -0.32227600 |
| F | 8.15374600  | -1.01180400 | 1.24703700  |
| F | 8.49568300  | -0.07614400 | -0.68135100 |
| S | 4.32580200  | 1.83125300  | -1.37542300 |
| H | 5.88020100  | 0.10795300  | -0.21274200 |
| C | -1.14265500 | 0.90159500  | -3.13591400 |
| H | 2.47471200  | -1.18873500 | -0.64637200 |
| O | 1.20728800  | -2.68898000 | -0.59927400 |
| H | 1.22098000  | 0.43538300  | -0.27941900 |
| O | -1.17410300 | -3.02352500 | -1.36983100 |
| H | -1.31217600 | 0.86389800  | -1.78351400 |
| C | -7.04578900 | -0.02214900 | 1.29632100  |
| C | -6.11463000 | -0.32096600 | 2.28262800  |
| C | -4.83659900 | -0.79294800 | 1.94383200  |
| C | -5.40185500 | -0.62155500 | -0.42371500 |
| C | -6.69240800 | -0.21218700 | -0.03493400 |
| C | -1.63994600 | -0.39298400 | 3.01159900  |
| C | -2.62996700 | -1.27610400 | 3.44024500  |



|   |             |             |             |
|---|-------------|-------------|-------------|
| C | -2.31436500 | -2.25904600 | 4.39196500  |
| C | -1.07407800 | -2.26402900 | 5.01689700  |
| C | -0.16600200 | -1.25478000 | 4.70711900  |
| C | -0.41155100 | -0.30496500 | 3.69846300  |
| H | -7.42535500 | -0.03607800 | -0.81567400 |
| H | 0.77698700  | -1.19587200 | 5.24132000  |
| C | -4.13345100 | -1.29053800 | 3.19924800  |
| C | -4.83675400 | -0.40449800 | 4.28575200  |
| H | -4.76811300 | -0.84105300 | 5.28625900  |
| H | -4.34125000 | 0.57292700  | 4.31422900  |
| H | -3.17898800 | -4.25152700 | 4.54169500  |
| H | -3.93636400 | -3.05864800 | 5.59073500  |
| C | -4.46223600 | -0.85735200 | 0.60104000  |
| H | -8.04161800 | 0.32816900  | 1.55513800  |
| H | -0.82480500 | -3.01612700 | 5.76093600  |
| C | -6.28269600 | -0.23915100 | 3.78212000  |
| H | -6.93261800 | -1.04479400 | 4.15114900  |
| H | -6.73931700 | 0.70417300  | 4.10278000  |
| C | -3.48120700 | -3.19973300 | 4.60086200  |
| C | -4.44974700 | -2.79882500 | 3.46679400  |
| H | -5.50252200 | -2.96686000 | 3.71323200  |
| H | -4.22023800 | -3.37251300 | 2.56243400  |
| C | 0.59450200  | 0.79122000  | 3.53407800  |
| C | 0.25731100  | 2.10198900  | 3.96282000  |
| C | 1.93080700  | 0.48319700  | 3.17694300  |
| C | -1.03632500 | 2.45165300  | 4.47050000  |
| C | 1.27055100  | 3.13387900  | 3.96441800  |
| C | 2.94124300  | 1.51695100  | 3.22391800  |
| C | -1.31428500 | 3.71688900  | 4.91845300  |
| H | -1.80551000 | 1.68971600  | 4.51685400  |
| C | 0.93193600  | 4.44872000  | 4.41477900  |
| C | 2.57808400  | 2.81669000  | 3.58506600  |
| C | -0.32215000 | 4.73695500  | 4.88284000  |
| H | -2.30275400 | 3.94612600  | 5.30747100  |
| H | 1.70679100  | 5.21152800  | 4.39844200  |
| H | 3.34190100  | 3.59103500  | 3.61556200  |
| H | -0.56055800 | 5.73512600  | 5.23981900  |
| C | -5.18838500 | -0.84430000 | -1.88773500 |
| C | -4.96306700 | -2.15423600 | -2.38464800 |
| C | -5.40629500 | 0.23147400  | -2.78833100 |
| C | -4.77989000 | -3.29313800 | -1.53712600 |
| C | -4.95403600 | -2.38124000 | -3.81339400 |
| C | -5.42379600 | -0.01920400 | -4.21214000 |
| C | -4.56802900 | -4.54325000 | -2.05537400 |

|   |             |             |             |
|---|-------------|-------------|-------------|
| H | -4.80744300 | -3.16166800 | -0.46267600 |
| C | -4.72557000 | -3.70149500 | -4.31323000 |
| C | -5.19471900 | -1.31449400 | -4.68346200 |
| C | -4.53247300 | -4.75461400 | -3.46217900 |
| H | -4.42203100 | -5.38575700 | -1.38534800 |
| H | -4.71335600 | -3.84756400 | -5.39069200 |
| H | -5.20899200 | -1.49889000 | -5.75584500 |
| H | -4.35681100 | -5.75301700 | -3.85270800 |
| C | 3.67062900  | -1.12054100 | 2.56919500  |
| H | 3.96123700  | -2.13193600 | 2.29970100  |
| C | 2.35081700  | -0.83534600 | 2.80467800  |
| H | 1.60743100  | -1.61667000 | 2.71324300  |
| C | 4.66737900  | -0.10605500 | 2.65098800  |
| H | 5.70630800  | -0.35502400 | 2.45578800  |
| C | 4.30329700  | 1.17957900  | 2.94560100  |
| H | 5.04757600  | 1.97066300  | 2.98897100  |
| C | -5.85430700 | 2.59362900  | -3.25032200 |
| H | -6.00539000 | 3.60760900  | -2.88987800 |
| C | -5.89752800 | 2.33329900  | -4.64954100 |
| H | -6.09546200 | 3.14547500  | -5.34359800 |
| C | -5.67907000 | 1.06350000  | -5.11188000 |
| H | -5.69858100 | 0.85026600  | -6.17817300 |
| C | -5.61287500 | 1.58303900  | -2.35527700 |
| H | -5.56471200 | 1.80669100  | -1.29583100 |
| C | 2.18904600  | 4.39568800  | -2.16687900 |
| C | 2.77891300  | 5.12478000  | -1.12010100 |
| C | 2.57422100  | 4.73829600  | -3.47217600 |
| C | 3.72399000  | 6.11916500  | -1.36179300 |
| H | 2.49070800  | 4.93456100  | -0.09238200 |
| C | 3.51977100  | 5.73627600  | -3.72107000 |
| H | 2.15335300  | 4.22383600  | -4.32875300 |
| C | 4.10651500  | 6.43071000  | -2.66666200 |
| H | 4.16364000  | 6.65122300  | -0.52195800 |
| H | 3.79705700  | 5.96211000  | -4.74758600 |
| H | 4.84728600  | 7.20257600  | -2.85675000 |
| C | -0.28629300 | 4.11239200  | -1.70764500 |
| H | -0.54746700 | 4.47000000  | -2.71144700 |
| H | -1.04088400 | 3.37321000  | -1.43241200 |
| C | -0.38865600 | 5.32569400  | -0.79239000 |
| C | -0.95531000 | 5.28901400  | 0.43278900  |
| C | -1.72266000 | -0.46170700 | -3.52488800 |
| H | -1.26216900 | -1.31037300 | -3.01896900 |
| H | -2.78588500 | -0.48358700 | -3.28832200 |
| H | -1.62177000 | -0.61323000 | -4.60851700 |

|   |             |             |             |
|---|-------------|-------------|-------------|
| C | -1.11813100 | 6.53053700  | 1.28313900  |
| H | -2.18121900 | 6.80044900  | 1.37109300  |
| H | -0.76388200 | 6.33838200  | 2.30443700  |
| H | -0.58505300 | 7.40176900  | 0.89857400  |
| C | 1.10597400  | -0.15636600 | -3.35693200 |
| H | 2.16893400  | 0.05429500  | -3.25625500 |
| H | 0.84677400  | -0.99597600 | -2.70705200 |
| H | 0.91717300  | -0.50910300 | -4.38278600 |
| C | 0.02045300  | 6.65505300  | -1.42145100 |
| H | 0.45051400  | 6.51052000  | -2.41459500 |
| H | -0.84787900 | 7.31876400  | -1.53194900 |
| H | 0.76978100  | 7.19524700  | -0.83418300 |
| C | -2.08742100 | 2.04075500  | -3.53673800 |
| H | -2.90528300 | 2.15465500  | -2.82133900 |
| H | -1.59293900 | 3.00310500  | -3.64542400 |
| H | -2.54274200 | 1.78270000  | -4.50018000 |
| C | -1.52189900 | 4.05991000  | 1.10194800  |
| H | -1.65675600 | 3.20247500  | 0.44172600  |
| H | -0.88970400 | 3.74009700  | 1.93812000  |
| H | -2.50238800 | 4.29299900  | 1.53987800  |
